# Supplementary material for: Increasing taxonomic and functional characterization of host-microbiome interactions by DIA-PASEF metaproteomics
Source: Front Microbiol. 2023 Oct 16;14:1258703. doi: 10.3389/fmicb.2023.1258703 (PMC10613666; doi:10.3389/fmicb.2023.1258703)
Supplement: Supplementary file 8 [file Table_1.XLSX]

## Sheet: DDA-MQ-Protein
Microbiota													Host
Protein IDs	DDA-MQ-1	DDA-MQ-2	DDA-MQ-3	DDA-MQ-4	DDA-MQ-5	DDA-MQ-6	DDA-MQ-7	DDA-MQ-8	DDA-MQ-9	DDA-MQ-10			Protein IDs	DDA-MQ-1	DDA-MQ-2	DDA-MQ-3	DDA-MQ-4	DDA-MQ-5	DDA-MQ-6	DDA-MQ-7	DDA-MQ-8	DDA-MQ-9	DDA-MQ-10
1_GL0004722;MH-0-3_GL0005477;S-Fe2_GL0170894	NA	NA	NA	NA	NA	NA	124440	4849	158310	NA			O08553	68438	67257	67554	80019	62724	84315	75212	74607	74562	87540
1_GL0041992;2-1_GL0038151;8-5_GL0034441;MC-6-3_GL0014865;1-2_GL0023035;MH-6-3_GL0111249;MH-6-1_GL0088296;S-Fe9_GL0207036;20_GL0172070;S-Fe7_GL0176825;S-Fe20_GL0059594	132000	119470	155000	141740	97463	106340	120810	135910	126070	139770			O08573	40906	29076	NA	41373	12410	NA	NA	NA	NA	45576
1_GL0043524	74126	80543	94494	NA	57495	83494	88266	80114	92206	116790			O08601	109190	134660	76806	76849	70934	65270	71997	71703	58000	74500
1_GL0065332;6-6_GL0015877	NA	NA	NA	23180	28841	39521	50579	39887	43271	59935			O08709	519920	583720	499650	539720	548430	488750	503550	498100	505550	483430
1_GL0092558	18712	16858	24995	16152	18540	19902	19522	22988	20162	20374			O08749	389110	422220	416380	352570	297880	368120	440970	263160	360520	390400
1_GL0100631;G1-4A_GL0019983;14_GL0124354;6-1_GL0062513;S-Fe8_GL0195568;26_GL0076787;1A-dyr4-07_GL0048160;G1-5A_GL0015696;11_GL0011325;1-2_GL0040405;1-4_GL0084533;3-2_GL0067552;1-1_GL0151501;S-Fe6_GL0192230;26_GL0097174;Group2-3A_GL0028895;6-7_GL0026521;2-2_GL0089550;20_GL0175919;11_GL0026527;1-1_GL0124360;G1-2A_GL0023229;S-Fe20_GL0026058;2-1_GL0097897	1379800	1227700	1228500	1177100	1151400	1206000	1154600	1183200	1171100	1163100			O08756	72848	65049	66127	50763	50745	90644	82593	NA	NA	NA
1_GL0113163	308350	349860	320240	347890	339080	312210	314670	307490	331590	329010			O08795	NA	65164	36832	53483	43950	62923	48029	44564	59952	52710
10_GL0002188	NA	16160	105710	NA	NA	171320	NA	119840	65089	NA			O08807	195030	152070	101540	101720	94547	91931	98657	152790	108490	79219
10_GL0011642;5-8_GL0142127;S-Fe10_GL0072623	355000	345340	320980	292540	252570	249430	234360	214750	245730	222810			O08848	483850	500440	467710	460120	461720	NA	530120	NA	522090	NA
10_GL0012297	118500	119890	105600	116990	111180	110680	115020	107610	NA	113270			O08992	103840	91701	95530	84953	108320	99759	NA	NA	102680	147000
10_GL0015619	64473	NA	68317	NA	80711	70123	68103	NA	NA	NA			O09037	454150	495970	349140	523720	444980	430920	329520	368910	346400	336430
10_GL0017432;2-6_GL0065188;2-2_GL0125591	35267	36418	51974	62272	55612	58485	50469	76975	59293	70928			O09049	5701400	5990300	6305600	6653400	6613100	6102700	6001600	5797600	6294200	5936900
10_GL0022027	553180	405920	540190	424010	314130	353840	421560	380130	259580	399900			O09061	267000	213670	247610	192980	204500	190360	172330	168060	140220	230030
10_GL0022779	31607	43472	33046	48210	38179	57796	53890	43913	44151	83476			O09131	39406	42930	95406	96752	NA	87156	77529	77959	79446	44848
10_GL0022788	397390	288070	307370	170450	120320	927850	133890	74573	267330	264580			O09159	134960	159630	115800	153550	173380	117000	67842	201080	162010	104230
10_GL0023967	41669	47113	37697	41464	38964	31159	30536	32609	31339	33870			O35054	235220	208230	175280	NA	187130	190190	220690	NA	251950	242280
10_GL0025698	689430	765360	796560	876510	705520	776600	776520	712020	698700	772380			O35129	76011	49136	48782	38894	37679	39303	37563	37493	39221	34422
10_GL0030674	361340	348430	392300	347110	376420	432120	381270	361600	353380	371460			O35350	62403	60289	52292	54226	49324	48154	47640	48017	46704	48894
10_GL0030675	NA	117050	NA	20901	NA	NA	NA	NA	77979	49969			O35594	177360	167800	165380	154460	163100	156520	146890	165790	83361	132330
10_GL0030677	368510	222840	311570	291500	313720	237890	38960	224640	283190	371800			O35598	236770	257400	287670	280480	NA	269470	326630	226380	292570	261730
10_GL0030713	183740	186470	NA	161730	152260	151580	39216	NA	180260	NA			O35639	113670	110840	90939	104590	96476	91841	95618	96923	96512	96833
10_GL0040330	20554	20178	30392	38496	75882	NA	NA	28784	42683	NA			O35658	13004	33350	29910	NA	57014	33043	29238	NA	NA	NA
10_GL0040778	161130	128640	230020	171070	91666	NA	70713	189760	126540	109220			O35684	58940	65172	71083	71248	62128	65949	63788	62776	57107	49225
10_GL0042587	71256	NA	70274	69653	70032	50978	62800	59585	59289	67249			O54990	66682	96848	105230	99443	84783	99810	94666	98753	97777	121660
10_GL0048655	NA	303140	434270	159950	NA	NA	NA	NA	292960	NA			O55111	45889	65726	47730	45710	57357	55578	NA	51512	49425	NA
10_GL0054899	60087	56815	59003	55306	63648	75013	77920	74053	72177	80710			O55135	39367	25482	29965	30349	24973	23984	35215	36999	30040	54698
10_GL0063323	237960	240310	190430	184070	169350	254110	262850	228950	292500	340310			O55234	46485	89188	49816	59240	44909	65415	73713	52784	53319	50893
10_GL0063930	390950	217580	109100	339330	206080	197480	265170	222380	203140	279800			O70370	463870	510360	496520	510470	507280	537640	577920	548580	668290	500350
10_GL0065599	NA	124000	72409	NA	13587	13739	49990	NA	24175	101760			O70435	242950	250670	222080	238620	206980	139620	187200	187540	138260	169350
10_GL0065662;20_GL0014278;S-Fe10_GL0095560;S-Fe10_GL0082892;MC-6-1_GL0006653;MH-0-4_GL0022652;31_GL0038728;G1-1A_GL0076432;1B-dyr11-07_GL0006915;1A-dyr1-07_GL0007946;14_GL0134396;MC-0-1_GL0020550;MC-0-3_GL0013230;1-1_GL0141637;3-1_GL0019714;G1-1A_GL0026950;G1-1A_GL0052859;MH-6-2_GL0115474;MC-0-1_GL0037345	86974	NA	NA	40087	NA	2567.4	NA	84651	114580	NA			O70456	100310	91640	NA	84969	81264	NA	145040	59569	71281	NA
10_GL0066865;MC-6-5_GL0012643;MC-6-2_GL0022966;MC-0-1_GL0089057;4-1_GL0065988;20_GL0034540;1B-dyr11-07_GL0006909;1A-dyr2-07_GL0028331;1-8_GL0068166;10_GL0065656	NA	150770	NA	NA	NA	59119	122200	138100	NA	137000			O70475	92662	121440	124380	101730	97533	95811	124540	114740	113890	121830
10_GL0068853;8-2_GL0021262;11_GL0140676;11_GL0065712	34126	38580	75232	71068	110990	124170	100010	106700	101820	127620			O70570	5415800	4930000	4955000	5102000	4997500	4862200	5219600	4913400	4813700	5096200
10_GL0071530	155800	125720	176630	148110	135770	132980	125330	130750	113280	104210			O88310;Q80ZA0	4508700	4250500	4337100	4584900	4773200	4264400	4235400	4256800	4343600	4242000
10_GL0074962;1-1_GL0030434;G1-3A_GL0124836;S-Fe20_GL0169250	NA	352480	214050	183260	206760	NA	162910	175060	201570	152530			O88312	497720	406480	411920	397660	387700	399980	411110	391860	417610	395850
10_GL0075367	201680	216890	243570	173360	177360	173630	158870	184370	118590	NA			O88329	164820	280010	108670	180400	171510	193070	166410	158320	228460	160000
10_GL0093032	31129	30025	32692	NA	28868	31830	31353	31305	33046	31747			O88342	52420	35953	61330	34850	59302	46997	83904	91778	61550	84386
10_GL0098958;11_GL0064789	194140	124410	193100	162870	198630	167790	148800	147580	151200	162860			O88428	71783	37638	8994.7	NA	NA	NA	NA	54950	57778	NA
1-1_GL0000642	236160	243090	263500	296850	300330	NA	NA	484290	NA	NA			O88456;Q9D7J7	49529	44481	40331	47853	44107	42076	43794	43341	41774	38841
1-1_GL0001529	877670	1038000	964320	908040	959780	921420	873680	857460	840730	821280			O88533	16003	NA	NA	18776	9837.3	36975	21901	15947	10538	15667
11_GL0002095;MC-6-2_GL0150055	93522	NA	NA	82552	NA	98825	108970	NA	NA	NA			O88569	13518	171110	87839	104680	88174	55076	NA	61994	NA	66482
1-1_GL0002265;1-7_GL0092975	166010	209230	220070	301370	251780	249660	241190	238310	253930	261930			O88593	352530	215520	334030	288850	319280	350000	297110	283000	308710	322930
1-1_GL0003043;MC-6-4_GL0000211;Group2-7A_GL0109897;3-7_GL0034754;MH-6-3_GL0092342;MH-6-4_GL0044125;S-Fe20_GL0051579;S-Fe6_GL0216681;S-Fe8_GL0248696;MH-6-3_GL0047101;S-Fe7_GL0187488	107980	123100	101900	112800	92318	101530	96607	97411	91739	95460			O88792	303120	292530	309900	314220	309970	359500	301580	333780	295710	303530
11_GL0003265	95440	107050	103300	97836	91110	100080	101910	99515	99136	107710			O88844	58893	32204	74611	30408	30906	NA	15257	NA	51219	161450
11_GL0003545	126060	191860	125120	163840	167990	186880	154910	158830	160210	182550			P00329	188650	192850	209980	216890	157890	285100	188030	232990	258700	247990
1-1_GL0003946	NA	208100	190010	210710	154010	NA	168240	214160	NA	NA			P00405	393500	353260	353960	341110	330880	336440	312440	293650	325350	322820
1-1_GL0004559	44999	24937	50988	38205	41659	39253	24074	46443	103670	56594			P00683	39186	36541	40348	38389	45076	44451	56905	38301	43962	40825
11_GL0005088	37209	62684	58291	57531	54420	66424	57164	NA	45436	75971			P00687;CON__Q3MHH8	416570	430470	480020	515810	495010	496390	518690	482310	493120	532970
11_GL0006171	65324	NA	NA	NA	51907	101030	NA	60610	7107.3	55359			P00688	4879800	4329400	5257600	5359300	5428600	5328600	5468200	5493800	5214500	5299900
11_GL0006534	200820	208410	285550	280740	286420	326720	278750	298570	307160	332010			P00920	368160	339060	328230	364530	325830	358010	340030	332470	315740	318090
1-1_GL0008837	201830	102770	47109	157220	148370	85268	127660	NA	NA	NA			P01027	106980	86595	84213	76512	122360	89455	64551	72751	53634	29888
1-1_GL0008925	69463	65944	49924	59303	56187	40429	56953	49827	56552	43324			P01592	6741600	6424700	6552500	6486800	6451400	6189900	5528000	5756100	5387800	5139000
11_GL0008962	NA	31647	11390	72682	32713	NA	NA	NA	NA	NA			P01630	299410	321900	326810	NA	NA	407930	110870	328550	443950	NA
1-1_GL0009612	276490	243080	300910	299700	302590	282790	340780	324160	290240	332030			P01631	1707000	1647500	1657800	1600900	1601500	1607200	1726000	1608200	1591000	1712600
11_GL0009802	91545	67946	76770	69387	59897	74165	66551	NA	73601	69280			P01633	2046400	2165500	2316300	765140	1791100	1992800	2302700	1703600	1372700	1630700
1-1_GL0009843	185430	187580	209990	184400	189480	128740	180980	190720	177270	173330			P01634;P01632	9784.7	130480	166310	166900	NA	48142	35133	2074.9	NA	143070
11_GL0010402	351990	332990	284110	316790	304540	263910	279840	297660	252930	279610			P01635	1138000	1124700	1015300	959670	926740	957550	972140	974840	935980	959090
11_GL0010649	368570	349430	359900	517820	356210	359940	321860	373740	445490	518250			P01636	837230	596160	NA	851850	806350	535000	114280	767280	805100	488280
11_GL0010650	230200	207390	202670	206150	217280	215630	78068	275180	150410	175820			P01638;P01637	426250	483980	495470	488540	485180	423030	480080	491500	499380	465170
1-1_GL0011358	NA	278090	224490	NA	203950	278990	197330	NA	NA	NA			P01639	715970	740490	754040	709390	702190	764010	773060	737330	759570	786340
11_GL0011607;S-Fe20_GL0084968	38251	53699	46070	47682	48559	NA	46107	45571	27614	NA			P01642	NA	NA	1198600	1243800	1189500	1157300	NA	1117500	NA	1062500
11_GL0011810;S-Fe3_GL0098457	29822	151860	NA	136370	448810	31788	365450	329460	154390	261620			P01645;P01644;P01647;P01646;P01643;P04946	1315400	1520600	1266400	1445600	1514900	1513300	1778900	1678700	1678600	1716900
1-1_GL0012052	158940	118090	239540	205240	194130	217180	281830	178560	136910	320630			P01648;P01649	NA	1572000	1373500	NA	1626800	1551800	1553900	NA	1705300	1601500
1-1_GL0012145;11_GL0034911	219790	210100	225720	212120	212140	197820	214130	197740	169290	208380			P01657;P01668;P01673;P01672;P01671;P01670;P01669;P01667;P01666;P01665;P01664;P01659	188050	156030	NA	124780	NA	103620	107150	129000	102910	127310
11_GL0012274	73951	270380	74350	117900	73987	97539	98167	77888	87401	112360			P01660	157690	157660	183010	157620	170360	150450	145630	138270	156950	144810
1-1_GL0013371	90147	66278	80972	52537	64851	82296	77634	NA	NA	91153			P01679;P01678;P01677;P01676;P01675	NA	70115	32537	41373	58020	NA	NA	31443	34614	26861
1-1_GL0014587;S-Fe10_GL0091615;S-Fe15_GL0008547;S-Fe10_GL0150402;S-Fe10_GL0072587;MH-6-2_GL0001655;MC-0-3_GL0054813;MC-0-1_GL0077067;MC-0-1_GL0004210;1-1_GL0077824;10_GL0045525;MC-6-5_GL0095509;MC-6-2_GL0114686	46294	32008	37696	71311	39691	36568	41831	51075	46650	48527			P01680	580400	493010	427910	458780	391550	285270	356210	NA	368230	307720
11_GL0014868	584150	588850	555000	589720	552120	569920	575130	565650	549620	537270			P01724	273030	NA	211360	NA	NA	1331700	1423000	2092700	157160	NA
11_GL0014907	463400	428030	447800	476560	436510	464170	457450	430410	449850	450910			P01725	76771	61759	47124	49021	34946	51109	58795	NA	72456	69339
1-1_GL0015108	335750	318110	318840	328530	345100	351420	327510	467050	316920	314940			P01741	NA	NA	19249	3139.6	NA	34170	32928	31748	32039	34700
1-1_GL0015695	86870	100910	128110	109620	109360	135790	148670	147950	170530	167860			P01750	41571	35177	77267	73237	86268	53786	55430	107320	65649	87301
1-1_GL0015696	104850	87584	86911	121350	29888	98216	98877	120770	85046	56137			P01758	131390	138730	NA	3119.2	269870	NA	219120	NA	173960	NA
1-1_GL0015814	125610	104460	99790	125620	92360	114940	96071	82311	98547	93559			P01790;P01794;P01791;P01788;P01787;P01789;P01793;P01792	NA	129860	NA	NA	NA	NA	136740	NA	122270	NA
1-1_GL0017506	207050	178260	153490	188810	179520	188840	158730	185840	195250	188680			P01800;P01799;P01797;P01796;P01802;P01801;P01798;P01803	227310	182690	233460	205280	236770	227160	237390	250820	217150	262460
1-1_GL0018142	202180	244010	234690	110380	85785	35993	189180	151530	138520	157640			P01804	95024	87795	82307	77753	80599	87161	84958	79204	75985	76834
11_GL0018497	662850	616780	626700	612180	618040	611450	641830	603140	604390	604370			P01820;P01819	NA	523800	472700	499270	447860	476740	433810	422730	294940	NA
11_GL0020263	47908	65944	71775	75121	42324	47861	NA	39936	NA	8394.9			P01837	7133200	5807400	6773400	6810100	6172800	6166000	6617600	6399000	6801300	6139900
11_GL0020264	48345	61413	58801	36266	49422	48990	77743	66438	87794	73265			P01843	963470	959220	967520	951530	921530	951480	987420	950420	882590	984140
1-1_GL0020905	60530	164060	181530	240620	194840	193670	NA	198640	216570	NA			P01845;P01844	48292	53358	57143	49425	49844	49117	44911	48971	35650	52638
11_GL0021641	136560	92613	105810	119410	114110	100760	153950	107910	109450	120430			P01867	65869	69028	67645	65223	63321	55092	57369	56213	52228	65879
11_GL0021701	431610	391440	441960	405240	447130	457780	432010	420810	442070	435170			P01878	10679000	9937700	12190000	11730000	12081000	11659000	11629000	11254000	10944000	11053000
1-1_GL0022476	976750	947730	1065100	1046600	1060600	1080000	1097100	1048200	1079100	1067000			P01899;P01895;P01898;P01897;P01900;P01896;P14427	117950	104530	107840	101650	124820	98609	41656	159470	112310	130850
1-1_GL0023432;20_GL0015813	152720	120730	70116	124050	111150	109020	109010	124110	115890	121390			P01942	193810	340480	324940	330320	326570	175070	342980	323360	352150	761650
1-1_GL0024532	113640	NA	87598	NA	26554	81259	NA	84204	86054	65156			P02088;P02089	258240	225120	150700	271810	191370	299750	264540	268110	225480	233270
11_GL0025380	390740	319140	398460	388700	335690	394850	403320	417680	402420	447520			P02301;P84244;P68433	541500	563040	184650	262470	204650	119960	150770	120430	159490	158370
1-1_GL0025390	370430	453980	362160	326510	352790	304360	365060	382130	392170	444490			P02816	4914100	5363500	5411100	5456400	5371300	5022700	5079400	4604800	4951000	4526200
11_GL0025983	32256	32569	25298	33694	NA	25290	32545	NA	35678	37169			P03953	153190	NA	178700	118550	105590	93365	124840	89072	29881	116480
11_GL0026529;G1-5A_GL0015694;6-3_GL0040209	88842	NA	NA	15948	NA	NA	22704	15462	NA	NA			P03958	175710	157660	150550	99926	114630	109810	124880	114420	123210	120880
1-1_GL0026635	633500	457530	546870	504660	501020	455320	448820	491820	341990	423320			P03976	165180	172790	164650	143560	170340	167440	181510	170610	165820	144760
1-1_GL0026659;S-Fe1_GL0135833	71234	91249	110840	NA	126910	165320	155900	130910	197420	188310			P03977;P01656;P01654;P01655	68442	65986	72372	70143	72304	79805	72304	62947	70946	84622
1-1_GL0027389	57562	51297	68133	47358	57669	59769	65085	55022	63276	50412			P04104	58452	65845	45302	50660	53430	47832	45745	59695	49738	NA
1-1_GL0027394	370880	436380	385090	318720	329550	349640	373370	336440	349880	344820			P04444;P04443	31805	32021	38052	39113	39782	32707	36541	38111	32211	41405
1-1_GL0027791	75564	80935	76758	77545	79759	67708	72990	73784	73981	66879			P04939	855370	760790	NA	500130	472520	NA	550460	785870	631650	277840
11_GL0028376	5211600	1475600	1511000	1521700	2160600	1993500	2003300	1514600	1461600	4533600			P04945	430450	498910	459170	445530	440920	429690	NA	394430	414050	400140
11_GL0028428	NA	130630	107390	140000	94036	NA	132520	131080	NA	NA			P05064	148810	126980	122920	124780	136330	150640	151140	195780	176230	140870
11_GL0028479	NA	9359.5	101980	NA	98295	NA	123890	NA	202480	NA			P05201	33282	33691	NA	27215	NA	27320	24995	21976	25760	21268
11_GL0028561	187450	NA	NA	179880	NA	NA	NA	NA	NA	NA			P05202	174810	168250	144150	157140	164620	131200	199480	145410	143640	148570
11_GL0028726	70136	38917	39089	43712	46806	48339	51200	44640	76341	46098			P05208	14420000	13789000	14426000	13473000	14428000	14195000	13481000	12311000	11737000	10513000
1-1_GL0029153	43044	22489	NA	100020	53400	71476	76114	68645	92107	72244			P05213;P68368;Q3UX10	613640	453690	311480	302330	272130	205110	223910	224790	182900	214830
1-1_GL0029988	138940	138280	143360	126040	87123	8939.7	121180	115310	102420	109180			P06151;P00342	892690	1011100	992520	960700	920160	890110	871150	820850	811790	866590
1-1_GL0030443	73483	63963	54450	50271	54803	78024	93462	99480	93032	83141			P06328;P01754;P01753	40438	50499	13095	45624	16192	49601	NA	NA	21379	92736
1-1_GL0030452;1-4_GL0006688;1-1_GL0144870;1A-dyr1-07_GL0010461;Group2-8A_GL0041768;1-1_GL0091757;1-1_GL0048779;6-1_GL0049235;1-3_GL0067338;6-5_GL0012467	12313	110300	157690	104150	193980	97462	127770	46238	99371	110790			P06330;P01757;P01756	2018600	1815100	1967000	1992600	1944300	1882700	1990600	1896400	1864200	1890500
1-1_GL0030908	66374	86791	127500	91489	84527	88906	NA	187010	31919	85658			P06728	246310	180200	219300	207120	188740	184450	188880	225310	169220	191280
1-1_GL0031225	382660	627380	309680	306250	265840	496360	389420	343210	521340	293740			P06797	56532	54855	39210	63400	NA	24192	NA	87740	43843	73525
1-1_GL0031226	807540	827190	819360	832150	882700	864130	837370	676540	754540	707360			P07146	34566000	43674000	42570000	43596000	48813000	47201000	48043000	45015000	53127000	47123000
11_GL0031897	546960	613850	637450	664460	699840	628460	628150	601000	550230	608030			P07309	654130	776390	655930	611210	594960	656340	715710	672680	701940	712260
11_GL0031899	402670	NA	339770	292830	319250	389800	379060	397040	395490	433700			P07356	1202300	1172500	1083900	1104100	1079900	1077300	1018700	1057900	1030300	1064000
11_GL0031901	1404100	1466100	1447600	1514500	1335200	1368600	1486300	1406100	1326700	1353700			P07724	2337300	2369800	2155000	2242700	2243000	2410700	2381900	2255400	2248100	2132400
11_GL0032113	6017	36746	49112	65025	48802	70762	62362	59046	57531	48256			P07743	252750	308090	298520	280560	240020	292860	288110	287880	257440	250300
11_GL0032640	54065	NA	40967	50119	51661	51848	49777	50516	56768	72692			P07759;P29621;Q80X76	1856400	1860100	1773400	1861000	1853900	1767300	1811600	1776500	2006700	1800200
11_GL0033162	188260	198370	221810	253830	264180	250380	220600	229010	282170	266120			P07901	233350	140060	91038	99831	89884	92873	83816	77683	75438	62709
1-1_GL0033364	150380	190980	174560	172430	176880	208390	163150	167130	159490	158760			P08003	94538	89657	103390	99878	97036	93575	93639	88738	87278	94925
11_GL0033854	266450	235410	285330	283820	296120	282130	244730	289800	327510	293050			P08113	194730	194800	199210	163450	243670	183230	190850	172080	149970	170100
1-1_GL0034633;MH-0-5_GL0067897;7-5_GL0150318;23_GL0096062;1-7_GL0140302;1-2_GL0015611;4-7_GL0019478;Group2-2A_GL0085143;2A-dyr14-07_GL0049191;1-1_GL0031879;14_GL0137105;2A-dyr14-07_GL0043773;2A-dyr14-07_GL0027383	199540	211980	264720	281940	226930	211610	265690	269110	278490	262050			P08207	NA	255210	NA	62203	9104.4	167110	39308	14327	64693	22205
1-1_GL0034889	NA	78369	NA	NA	167970	167370	NA	160260	110820	NA			P08228	2234000	2390400	2059900	2163400	2116800	2153200	2131600	2050500	2032900	2007200
1-1_GL0035152	31579	47754	41662	28788	NA	11627	43546	46723	30482	NA			P08249	755410	559730	659160	643830	523800	584090	609900	585240	584430	626460
1-1_GL0036247	628250	673200	673550	802630	607410	688490	644230	758100	689660	671750			P09055	86304	72206	81768	97707	106420	83469	90773	86054	97555	92352
11_GL0036264	710000	678920	749050	726810	665780	726470	813690	652030	713310	739320			P09103	314200	338010	352660	339850	332550	352480	352090	345640	357340	358420
1-1_GL0038124	169270	194870	146770	166910	89716	129980	167160	219580	158880	183320			P09411;P09041	174500	184170	150870	151240	151150	150020	147050	155070	148930	152070
1-1_GL0039242	143670	149310	126070	140690	119450	110180	81163	137170	102840	117410			P09470;D0G895	370110	306700	347490	350500	360300	335080	328150	326670	323330	360480
1-1_GL0039822;MH-6-5_GL0091986;23_GL0046726	119870	97151	86684	86828	111010	53718	52488	49885	98903	107880			P09528	410310	406110	356420	441370	385410	481070	495380	519930	513210	518480
1-1_GL0039894	254750	207760	236680	196540	204060	184060	NA	204390	200670	228030			P09671	306130	273430	261340	236780	231060	261870	267650	266980	291600	286030
1-1_GL0040368	652360	708500	666320	756310	784650	682040	641630	729240	665250	706890			P09803	1079400	1110400	1105600	1219300	1124900	1094400	1125100	1054900	1120800	1043400
1-1_GL0040818	70686	65346	77595	68696	83279	93725	80293	94734	78225	89988			P0DP28;P0DP27;P0DP26;Q9D6P8	281800	186970	192780	212630	188670	187200	202160	204230	187380	206730
11_GL0041387	592100	NA	519100	NA	NA	NA	494940	520860	NA	922780			P10107	1210200	899860	442010	186030	896590	591090	735020	651050	863760	694970
1-1_GL0041447	69616	NA	NA	NA	53461	53724	60054	58060	70338	48327			P10126;P62631	874760	791570	719060	676870	645270	656920	661140	637640	641870	630600
1-1_GL0041844	51993	64445	68582	54462	12940	105160	67022	70633	89944	49597			P10605	214920	164230	210040	273160	296420	263420	311490	364590	337010	318660
1-1_GL0041857	15206000	16222000	14320000	14512000	14137000	13899000	13298000	13321000	13104000	12942000			P10639	345040	302390	299150	305200	287440	298390	296380	273250	260390	244780
11_GL0042282;S-Fe4_GL0132117	58247	43235	54275	68058	42589	49626	65494	50959	58791	43378			P10649;Q8R5I6;Q80W21;P15626;P48774	200520	146000	120560	109080	85153	111360	107750	112900	118790	96260
11_GL0042298	674250	574910	598480	914880	278870	784240	760490	634820	780730	641910			P11031	87896	96615	81997	82877	61488	96926	87135	78572	83973	74195
11_GL0042302	98085	NA	NA	125830	NA	100990	109790	140320	NA	NA			P11088	68066	72128	72400	66599	70606	73618	70710	75268	67634	75855
1-1_GL0043110	112660	95692	145910	142410	166310	173850	157790	140590	173610	140460			P11352	183550	178540	169130	171180	170430	155200	159920	142940	119840	138350
1-1_GL0043549	85139	158090	41029	99929	14499	106220	NA	74817	NA	NA			P11438	219960	227120	230510	201300	202950	219720	237640	219070	2937.3	213850
11_GL0043820	470820	481210	430340	432600	402080	352930	401190	413570	392380	370130			P11499	183140	248940	97054	93010	89700	86178	77386	73026	87543	64817
11_GL0044172;S-Fe7_GL0198557	505870	527060	536630	531870	545680	555440	524060	562380	562100	578590			P11589	2149400	2775800	3297500	3274100	3448200	3217900	3289000	3411700	3108600	3389000
11_GL0044796;1A-dyr4-07_GL0032856	1073900	1095300	1092900	980360	1007000	1080000	968920	937200	995010	968760			P11590	179550	265010	338070	146970	337720	63890	126120	448830	325540	335020
11_GL0044803;6-3_GL0059447;G1-5A_GL0015705;11_GL0131224	160500	360690	375620	240070	288400	282790	334740	335500	345560	289490			P11881	NA	229010	239210	297720	173470	190730	233100	203490	191200	136740
1-1_GL0044944;MC-0-1_GL0079955	46375	54051	NA	NA	62510	50292	55846	36081	NA	NA			P12265	84934	96335	76716	82688	88789	88281	99749	72631	83305	73318
11_GL0045555	NA	NA	NA	NA	NA	37364	39439	NA	NA	46237			P12382;Q9WUA3	8243600	8429500	7481000	NA	7711400	7968800	8491100	7864900	7437000	7994400
1-1_GL0045586	456300	357830	408320	395750	390240	340000	343800	269250	317070	341300			P12787	332280	256240	544870	341720	389470	190620	318660	327120	396130	181800
1-1_GL0045676	146710	164490	144550	142500	139350	162630	149590	156560	178670	165510			P12815	34112	37759	42197	42277	46866	38579	31524	35020	29597	29808
1-1_GL0046107	272380	25919	34370	NA	NA	220700	NA	223360	43375	NA			P12970	25700	17898	NA	21254	21271	8170.6	18704	20467	16753	16729
1-1_GL0047300	30478	NA	NA	20465	NA	NA	NA	NA	NA	NA			P13542;Q5SX40;Q5SX39;P13541	127890	81637	64692	159720	229210	200150	161870	173170	152240	193390
11_GL0048662	112910	135250	126960	104620	105300	124190	70454	157180	150290	156280			P13634	1220100	1124200	1177700	1227900	1227200	1271200	1254500	1186100	1200600	1233100
11_GL0048685;8-2_GL0114566	NA	NA	202400	NA	NA	NA	NA	1328400	NA	NA			P14069	960920	953610	NA	NA	NA	601350	732180	814820	627540	NA
1-1_GL0048765	40987	NA	57570	NA	NA	21539	23824	NA	NA	NA			P14094	879530	980350	922510	988510	905800	863810	929110	976900	926770	1001100
1-1_GL0048867;1-1_GL0066104;34_GL0028183	262840	313460	343660	349820	351610	294380	306810	298440	243150	293440			P14131	56683	54540	45552	46511	42637	39764	38943	36895	39360	46568
11_GL0049644;4-7_GL0083512	142490	140010	139550	137920	123980	116390	112510	112600	106020	110360			P14152	420320	417040	445140	357150	370420	348750	377150	363260	368880	351780
1-1_GL0050368	224210	226300	215090	224790	211910	171890	182330	183910	164390	176300			P14206	22239	NA	326950	NA	NA	NA	NA	238970	NA	12770
11_GL0051057	279090	443750	227700	355940	168980	316580	311590	NA	431680	396540			P14211	404030	375670	431390	463110	595450	452360	453440	476740	498300	527170
11_GL0051060;6-7_GL0081591	123620	80551	119080	116510	20827	NA	NA	69928	133480	5437.4			P14426;P01901;P14430;P14428;P14429;P03991;P04223;P14431	136240	NA	178630	NA	117530	137930	148920	104320	66109	115870
1-1_GL0052826	9099.9	NA	NA	45832	38910	38129	NA	48296	59856	58315			P14438;P14434;P14437;P14436;P14435;P23150;P04228;P01910;P04227	96061	63272	167370	157520	194900	153100	155680	145230	139650	131070
11_GL0053212	76595	84678	59448	50911	78735	46675	69496	46652	126420	94522			P14483;P01921;P06343;P18469;P06342	225370	241380	235120	234530	NA	291590	270570	276670	232280	263750
11_GL0053215	NA	6883.8	10840	20385	NA	5526.1	NA	6254.5	NA	NA			P14869	40335	25527	41358	NA	41708	30352	30991	NA	44956	NA
1-1_GL0053884	140490	201380	123360	127880	107350	118920	178610	145660	132210	134480			P15864;P43277;Q07133;P43274	245660	218030	156370	165370	159620	152160	205810	185800	205530	192530
1-1_GL0054161	300860	324640	318840	310720	297570	307440	369130	317650	317350	303550			P15947;P15945;Q61759;P15946;P00756	3318700	3561900	3281100	3358600	3272400	3090100	3122600	2848800	2959700	2885600
1-1_GL0054810	99032	92410	101000	82252	78933	91196	95740	96017	115840	92890			P16110	369680	413300	354110	402620	434690	426750	384850	415420	411150	392970
11_GL0054940	77155	50949	66570	65687	63215	84683	NA	80240	80060	90572			P16125	71017	12351	7809.2	6170.2	7845.5	6109.9	6798.8	5722.6	NA	NA
11_GL0055314	245210	254720	243760	261290	223020	203100	203700	215920	195200	208650			P16406	1765900	1826500	1650000	1726800	1679000	1705200	1726300	1651300	1720300	1730900
11_GL0055324	NA	122900	73253	110030	109190	52642	100760	141160	74549	78914			P16546	287110	47972	43434	67008	40046	32194	102780	45952	66419	51223
11_GL0055390	83517	74697	75036	74753	76073	76589	71348	80580	76035	82211			P16858	610040	557500	477910	411010	277890	464470	458980	435990	402850	479110
1-1_GL0056183	1471600	1720600	1641800	1684900	1756300	1635800	1575200	1601500	1495500	1472000			P17047	37999	23135	29965	40561	45164	40023	64642	52379	25742	41039
11_GL0057242	85370	91696	92204	79654	78034	82702	86138	89004	96962	87919			P17182;P17183	562810	524420	417140	458540	473060	442510	418480	472890	332530	413120
11_GL0058639	120630	58745	NA	160570	200630	NA	NA	112620	141660	193930			P17439	NA	NA	NA	53789	57564	NA	NA	NA	NA	NA
1-1_GL0058790	44818	49544	43703	39848	42109	7238	37869	22783	41534	35418			P17533	92308	103140	89452	83630	89132	108060	111600	107010	110910	116960
11_GL0059124;G1-5A_GL0071216	759990	791240	641830	593390	639800	562100	573040	549270	511140	407800			P17563;Q63836	1380800	1371100	1368800	1387900	1393600	1297600	1358600	1303800	1323500	1353400
1-1_GL0059506	59122	83570	NA	84082	NA	NA	87195	NA	NA	NA			P17742	324150	219010	189520	202220	226740	203240	185650	215410	214320	197840
11_GL0059511	NA	77923	NA	66187	61134	70104	58159	NA	58761	57270			P17751	257380	238390	266080	222900	216300	202580	231300	210940	206980	196410
1-1_GL0059664;6-2_GL0051646	92921	70323	88976	87751	84689	94880	91310	92181	98978	109190			P17892	2105500	1981400	2117800	2193700	2175000	2158900	2113400	2104200	2063400	1978700
1-1_GL0060070	NA	76123	72604	70474	NA	68404	NA	66767	NA	NA			P17897;P08905	587800	759280	741890	838570	776380	716870	693630	760120	812940	628120
1-1_GL0060071	139370	195330	176420	NA	137170	NA	NA	NA	37957	NA			P18242	276840	201870	NA	368470	276780	396920	361910	258070	375510	246890
11_GL0060737	684940	603540	607060	605740	563770	590230	586380	534750	499020	592130			P18524;P01806;P01812;P01809;P01810;P01808;P01807	258860	257140	224890	199900	204750	224440	185980	194970	196930	194910
11_GL0061743	195780	179890	172460	163710	106420	185370	192280	136650	151700	191410			P18525;P18529	539550	577300	536700	476660	489530	501560	537360	489870	489060	500440
11_GL0062566	271840	252330	259610	274100	227280	273100	239460	240190	262980	226540			P18526	136440	95054	NA	43142	94203	NA	NA	NA	NA	NA
11_GL0062567	232970	117560	93212	114660	111400	110810	99381	100490	99602	181040			P18527	NA	NA	14419	23779	11945	16529	11541	13981	NA	32690
11_GL0062568	33795	NA	45029	35218	25724	43772	39971	35939	NA	33547			P18528	329040	338180	343990	283040	331560	398980	403690	408430	390070	390380
11_GL0062569	281950	275830	251190	296060	269290	272770	288180	262770	282680	274120			P18531	1763500	1638600	1493400	1555900	1505700	1597400	1658100	1670500	1567000	1670800
11_GL0062770	47275	139580	173300	171710	155600	172400	179120	154040	168560	183770			P18572	415980	215420	193750	194390	215700	177250	149330	221540	224190	175310
11_GL0062779;11_GL0122981;8-3_GL0048164	454030	335460	343130	337750	352120	322030	359490	325750	319010	351570			P18761	6974000	6346100	7335800	7874300	7759200	7844200	7858200	7559300	7713700	8023800
1-1_GL0063097	259830	140270	277920	360770	408430	323520	41221	353540	344240	334260			P19157;P46425	220870	276900	224950	221330	202530	190180	200040	232500	178680	198880
11_GL0063269	98726	62448	116950	137400	79755	113750	97267	125770	85626	84187			P19467	1350100	1405200	1218200	1213800	1235400	1138500	1112300	1082800	1109300	1102300
1-1_GL0063435;3-3_GL0108964	363680	67363	440130	409870	457140	429920	424890	NA	362200	408050			P19783	283430	307420	279510	299480	321100	262590	293500	277070	300230	293990
1-1_GL0063993	105180	106020	123680	93475	90770	95741	99663	104300	93695	103960			P20029	343640	306310	288810	326530	277780	330660	293720	302300	299560	280020
1-1_GL0063995	227670	216040	189380	212110	194140	201480	183500	200460	175960	205090			P20060	NA	NA	17340	NA	NA	NA	NA	56012	50171	95574
1-1_GL0064345;MH-6-3_GL0063230;32_GL0061905	207600	269310	161000	236420	248530	291940	296280	NA	255640	294670			P20108	58677	53832	52936	58000	57911	50861	57674	NA	NA	59957
1-1_GL0065399	415440	191050	425780	413220	359060	456690	188060	446420	375250	460540			P20444;P63318	216910	225790	243270	236320	236310	216240	279790	199960	303510	313000
11_GL0065713	NA	NA	NA	NA	31862	39569	41738	52926	54637	60393			P21278;P30677;P21279	94924	97106	74872	81765	70960	62092	66762	83059	68969	85830
1-1_GL0067993	233560	203050	191940	82943	165250	218200	200240	201010	255050	NA			P21447;P06795;P21440	347510	339540	340850	316780	339180	314630	323700	338200	350560	350760
11_GL0068447	NA	NA	82748	NA	NA	83335	NA	60463	60529	NA			P21550	NA	16763	NA	NA	NA	NA	NA	5159.3	NA	NA
1-1_GL0068882;32_GL0103930	186860	210340	167460	167060	88122	165270	286290	189070	247780	270930			P22599;Q00898	1260600	1147200	1044900	998290	985200	942360	940870	958970	961010	894630
1-1_GL0069134	248580	259200	239820	231300	333670	426190	404040	307340	43301	340710			P23492	NA	17977	30270	36144	34618	47827	33443	NA	50130	32413
11_GL0069170	127790	NA	35803	137990	81161	NA	76115	202260	NA	204020			P23780	99901	101030	88628	NA	89369	100140	85936	NA	95630	89551
11_GL0069306	261830	250180	243530	240020	226890	242630	228420	246250	232200	241190			P24369	296760	73330	225370	187630	169570	292740	160920	156550	181400	161060
11_GL0072670	28988	28225	26063	29556	27324	34011	36490	27548	28894	26223			P24527	NA	47029	NA	NA	NA	NA	3206.9	NA	NA	NA
1-1_GL0073107	363230	293480	363030	355930	316450	381320	384630	432260	379870	387810			P24549;O35945	107660	43230	122700	149220	97793	90259	86317	144740	112210	151770
1-1_GL0073437	120580	132620	NA	132170	132250	127970	120290	116580	115400	121180			P24822;P24823	4977500	4749100	5022100	4971600	4821000	4976600	4696200	4642600	4881400	4723400
1-1_GL0073618	82635	77836	69611	73935	58298	60125	48176	81807	74111	50739			P26040;P26043	381820	337440	317480	357490	329370	303620	324870	315140	283680	330720
11_GL0073714	181330	3880.8	143290	147530	153550	163870	173630	167770	164460	145540			P26041	122170	30115	16880	NA	42255	14165	NA	NA	30995	NA
1-1_GL0074148	238800	169210	91721	156390	149940	176300	165980	126730	145500	131710			P26231	71908	89109	73022	84137	112160	75489	43940	50754	74438	131270
11_GL0074655	121460	73073	104690	80270	78244	83720	72214	84162	100550	83092			P26443	51535	NA	82900	77176	NA	NA	68646	79583	88184	95274
1-1_GL0074860;MH-6-5_GL0032199;S-Fe20_GL0044944	2103400	1861800	1947000	1622100	1813300	1694600	1587100	1580700	1745500	1684400			P27005	94438	NA	NA	103870	NA	88525	77773	NA	NA	52565
1-1_GL0076153	41775	40576	64460	34613	40610	35207	37165	40718	30809	29253			P27661;Q64522	93608	NA	6022.8	7282.2	5642.4	NA	3823.2	NA	NA	NA
11_GL0076757	131350	92047	131010	135030	132340	151430	138530	140330	145150	141490			P27773	180550	185840	185160	188810	190810	124260	198880	185160	177390	183060
1-1_GL0077524	210850	164490	158750	193090	189890	178310	172730	172350	180780	153230			P28063	45237	50483	47852	51984	53809	63100	NA	96326	111490	56988
1-1_GL0077781	NA	98949	NA	NA	NA	80000	NA	91911	NA	NA			P28271	18972	19724	21549	22085	21482	21823	19460	21113	22158	21796
1-1_GL0078624	36552	38686	26626	26617	30104	32875	33349	45232	31959	30825			P28312	64641	NA	141920	139770	101620	128970	79844	93876	85369	49680
1-1_GL0078745	229910	271680	369850	203890	223690	470860	388860	320260	430810	387950			P28474	36931	32144	34736	35048	39284	NA	50662	35438	11585	32009
1-1_GL0080583	198000	197690	185100	224370	138970	277310	96996	22040	342330	179470			P28665	32703	9809.8	NA	NA	44749	64534	63263	29532	52446	55781
1-1_GL0080605	77359	65436	71222	95247	79096	71570	91260	104310	63278	90341			P28825	593360	640480	604610	663560	716790	645980	668480	683800	685510	743650
1-1_GL0080606	77560	82259	81556	83135	76436	84890	80883	95184	86907	84006			P28843	1367100	1382200	1347700	1298400	1320700	1233100	1263400	1204700	1315000	1280000
1-1_GL0080710	239590	204290	249100	253660	339660	266480	308670	328810	310340	292240			P29391;P49945	183970	263530	235250	291110	232750	321350	347670	258660	326380	301000
11_GL0081446	76136	41142	74334	87303	69499	82777	76699	88618	77939	94142			P29758	76669	96292	79395	83745	97564	94412	145390	103710	157330	137630
11_GL0081716	290880	283480	293730	259780	226250	208190	265020	447140	209300	249100			P30275;Q6P8J7	1029800	1055700	1038300	1034100	999900	963170	983850	911720	936930	935360
1-1_GL0082829	37465	29005	68285	73258	59296	58185	55863	71378	66541	157870			P31428	985130	979920	1008300	1099400	1153700	1148500	1162500	1153600	1180700	1187200
1-1_GL0082854;3-4_GL0054324;1-2_GL0110297	578100	546980	578580	630330	610280	591530	586480	537150	573060	545400			P31725	NA	482630	301650	321390	322180	374490	315210	NA	292580	269950
1-1_GL0083048	2118500	1854100	1809900	1905900	1838300	1778400	1904300	1799300	1732400	1872700			P31809;Q925P2	4010800	3650800	3869300	3825800	3783200	3635800	3696100	3746400	3681500	3553700
1-1_GL0084350	86302	152320	104050	109360	8699.5	52463	44433	40310	128710	6407.5			P32261;CON__P41361	238330	247620	300550	214860	241280	242970	254370	240890	267420	218510
1-1_GL0084994;Group2-4A_GL0034379	222740	160510	203270	240610	252520	206200	215390	215240	219980	234660			P35230	9170300	8846300	11067000	11027000	11257000	9622300	8537000	8393200	7125400	7444900
1-1_GL0085365	315350	598930	562140	606570	665450	558060	694400	631140	633570	616230			P35441	58043	52260	48044	NA	NA	NA	NA	NA	NA	NA
1-1_GL0086098	NA	NA	255820	248610	11881	13077	NA	479780	23565	633610			P35486	33933	27138	27705	25079	22058	24935	26672	23208	27386	24814
1-1_GL0089280	180430	161020	200150	199650	121880	115150	136270	125780	299380	NA			P35564	134910	108720	125430	NA	158770	152790	154320	111210	NA	114920
1-1_GL0089286	234000	197940	NA	258720	NA	246580	254310	266160	NA	248890			P35700	97158	257060	132520	104730	128840	145760	95616	114290	134070	113430
1-1_GL0089402	372960	263200	393990	255590	NA	274750	273840	285020	324870	280300			P35980	134590	142390	118840	121860	110460	108670	99548	101110	104100	110220
11_GL0090262	59777	67937	96594	79450	112760	41790	65470	45672	58518	56730			P36552	71547	3512.4	38266	1785.1	28315	51653	56096	187900	52137	53348
1-1_GL0091513	392670	385340	414700	457700	314840	363390	387270	404200	338460	306750			P37040	124930	143140	108180	109710	106300	NA	144130	97931	NA	80302
1-1_GL0092356	15667	13623	16046	20737	27264	15710	16724	NA	10535	14004			P38647	108190	53393	145660	73050	60912	84500	87171	56054	69148	92091
1-1_GL0092522	4780100	4308700	4615100	4738600	4626700	4573200	4574100	4578700	4620900	4813600			P40124;Q9CYT6	141560	117240	169320	161570	149990	170910	169390	134260	159920	171850
1-1_GL0093572	115700	62926	103440	114260	118630	113000	136350	130750	102890	133490			P40142	591660	724280	713710	700450	757980	756490	763040	717380	709560	720090
1-1_GL0093739	261970	256040	230580	258870	243620	241210	242940	243340	217400	233740			P40237	382810	355780	329280	336250	325660	358130	375850	453580	327220	385010
1-1_GL0093801;Q9Z2V4	102350	72491	94790	130370	90968	91819	138200	121910	90290	194800			P41731	176820	94152	167680	163280	134800	130400	153930	146580	66613	164320
1-1_GL0094467	89521	87738	93302	98287	89589	90461	95700	81335	98020	109000			P42125	97247	75040	61236	NA	47030	NA	43430	59896	44051	61889
1-1_GL0095104;MH-6-5_GL0183530	807290	820590	778710	746470	703650	727800	733800	786090	782280	739840			P43137	860460	820920	895420	812030	876520	804460	829360	859500	835010	793660
1-1_GL0095242	618110	640910	532760	559140	565890	537150	585410	497940	492890	499810			P45376	NA	NA	155070	NA	167160	156330	164930	135270	NA	NA
1-1_GL0095657	363000	354970	423130	380550	339000	401320	426120	407000	383970	408160			P45591;P18760	346620	NA	45095	NA	NA	NA	89959	NA	32296	86579
11_GL0095758	42473	80820	66472	49779	66213	76475	58310	69738	64050	77547			P45952	265820	277460	247060	258510	242620	226390	247720	224090	221450	219910
11_GL0095770	146020	230470	27666	233350	107330	144230	134810	192670	159740	91493			P46638;P62492	93694	120260	100680	89067	36480	151190	87229	87375	118100	82316
11_GL0095772	42781	42814	22857	23497	26458	28001	24521	NA	15468	35161			P47738	618050	588090	488730	575510	404370	453270	498980	468240	482090	514310
1-1_GL0096134;10_GL0063529	556810	519800	547910	564440	569020	592850	601000	552610	600630	580780			P47740;P47739	186360	220660	189890	220710	203690	218920	232520	208310	210750	207630
1-1_GL0096137	155880	175120	151370	141120	130550	117520	128920	169230	131210	105170			P47753	54641	53777	50189	41625	40818	NA	35410	36316	27349	41086
11_GL0096768;11_GL0136132	88020	72080	69463	106850	10527	79411	122270	107770	79303	99921			P47791	113580	91853	124220	107650	102870	126000	113700	109400	118970	97565
1-1_GL0097453	404980	398630	331530	368250	350360	340490	327560	369750	320120	351090			P47856	24046	91964	79419	96059	92691	129420	102910	113530	118320	116290
1-1_GL0097533	249590	259700	258420	232630	264460	265610	265760	270030	249540	277430			P47962	98693	96880	114210	79659	64931	66932	62321	59799	68602	76799
11_GL0098946	99082	87647	74314	10704	138380	126000	116950	80552	78267	20428			P47963	28443	15519	16876	NA	15776	17342	15931	16713	11656	17804
1-1_GL0100030	104600	107160	105910	121240	108200	97630	105300	83642	96193	102830			P48036	122120	140550	106200	104330	103730	106880	96742	93154	98357	98193
1-1_GL0100152	182820	138860	159640	193870	211180	219560	161860	164380	222390	206720			P48678	137960	112190	125380	93076	85224	97250	85327	87490	97862	95006
11_GL0100278	105570	119750	89920	82632	104370	92902	88294	79553	91949	78902			P48999	76060	80481	88930	75869	76889	90368	95674	102330	115570	120010
1-1_GL0101438	960860	1006900	1130400	1208000	1161200	1108300	1111400	1047700	994160	1066200			P49183	748010	511800	689910	649560	763860	767680	574890	763310	424020	430500
1-1_GL0101526;MH-6-4_GL0014773;6-4_GL0010578	46453	NA	281390	157060	NA	NA	179760	158300	NA	NA			P49312	149450	46517	24452	20518	20432	NA	34838	NA	32971	30885
11_GL0101716	153120	106770	160400	183610	195370	174120	52674	187330	201970	210940			P49722	22687	13839	18775	18397	21238	23854	19866	17887	20852	19281
1-1_GL0102102	175580	179330	163060	143480	135860	131130	131370	120470	133190	115100			P49935	116120	80650	NA	96135	NA	156150	91824	NA	89748	NA
11_GL0102613	762170	827940	807290	836940	857720	1582200	889120	810530	1081000	756370			P50247;MH-0-3_GL0069232;S-Fe1_GL0142651;MH-0-4_GL0004632;37_GL0013898	192820	197420	181970	204350	151650	174880	201290	171030	202810	190190
1-1_GL0103727	372740	351330	355240	328620	317290	341320	309600	387090	296150	314850			P50543	285640	100450	119320	112860	129650	84723	NA	105460	101070	96277
1-1_GL0103775;MC-0-1_GL0066732	57571	11220	38698	57614	66089	42570	33451	38686	46205	30712			P50544	154680	NA	165050	163400	159480	NA	193900	129530	NA	145640
1-1_GL0103989	187480	180900	180330	157060	164720	139590	146450	133330	117770	142910			P50709;Q5G865;P50713;P50707;P50704;P50706;Q64016;P50712;Q5G866;P50714;P50711;P50708;P50705;P28310;P28309;P11477	2520000	2829700	2497100	2503400	2601900	2302700	2662600	2450600	2746300	2570400
11_GL0104030	96621	97932	103010	93026	86963	91130	96688	89259	75753	84898			P51150	NA	NA	NA	20770	92785	NA	NA	45500	14613	NA
11_GL0104167	180850	128050	192210	159290	127230	170970	124870	151040	134770	189430			P51162	178310	192960	187720	158000	173060	164760	178250	186240	180540	144380
1-1_GL0104180	24158	26220	23590	27841	23945	32238	32673	41644	NA	37034			P51174	165740	170680	162580	133680	153250	133440	142550	148520	157430	147420
1-1_GL0104331;Group2-8A_GL0070902;S-Fe6_GL0127411	67368	51558	NA	NA	55678	53431	50351	55795	50285	50084			P51658	7265.1	7159	8400.8	9923.3	8222.3	NA	15769	15919	NA	NA
1-1_GL0104334	296170	NA	NA	NA	NA	194560	NA	NA	NA	NA			P51661	223030	94247	NA	115850	16470	NA	128540	NA	NA	NA
1-1_GL0104702	226390	262900	266740	187030	181360	223010	211250	215180	226600	205990			P51881	701250	580420	584690	543500	561090	454540	563040	677870	686920	654810
1-1_GL0104839	NA	75149	41866	58486	52011	61655	NA	30772	11608	47176			P52196	23691	45094	NA	NA	48822	NA	NA	NA	17054	129580
1-1_GL0104842	119390	62795	6483.5	31774	57954	NA	NA	41509	NA	37370			P52480;P53657	411930	319150	281800	283840	278860	298710	236570	269070	276030	271940
1-1_GL0106191	85065	104230	99004	90779	93639	99411	95658	97511	90024	108830			P52624	93651	70823	101190	82908	111900	90829	91967	85204	70238	101120
11_GL0106913;6-4_GL0079360;3B-dyr36-06_GL0005182;Group2-2A_GL0042555	35648	123280	37496	151720	79344	NA	136740	90786	265670	176350			P53026	NA	NA	104680	68102	NA	104480	46939	47971	37049	31740
11_GL0106920	61092	66777	NA	149620	NA	96502	176090	145840	81477	81957			P53986	15488	20818	18646	18441	14781	21313	19474	24289	19982	25507
11_GL0107160	29463	34859	26183	37761	55400	35440	37955	30582	34442	15547			P54071	422460	369300	378840	332610	355630	345730	356770	403110	372370	355310
1-1_GL0107181	97081	74714	69317	55406	63041	94470	83356	80936	93803	56361			P54116	189780	176510	159000	169650	166340	177380	143660	175420	150880	160500
1-1_GL0107764	157080	131860	155180	176500	160590	202840	146410	183330	166730	199940			P54869;Q8JZK9	217410	192440	187400	150190	152310	173770	164420	187620	169360	109900
1-1_GL0107767	1028400	1182700	174280	1114400	1181800	976480	1119200	950390	739180	843740			P55050	318480	280370	207710	291910	176010	NA	249130	316600	313910	261360
1-1_GL0108082	NA	200050	165440	195760	152260	128350	189140	178200	137950	NA			P55292	320830	330440	357740	293460	355030	361990	347310	353820	410690	363740
11_GL0108656	570780	610420	538780	537420	543180	553780	543740	534440	503060	522120			P56135	162120	98727	NA	NA	NA	188820	161700	152390	161580	171120
11_GL0108772	148020	151720	124760	139510	130900	142100	143880	164500	169540	152480			P56389	85552	83430	135490	NA	146120	99034	148660	NA	110680	140960
11_GL0108888	328820	266650	270010	286090	282190	231550	319750	252970	279280	280500			P56391	18718	NA	61446	45813	42143	56584	44284	46020	37429	56586
11_GL0109255	104900	190000	180660	164950	34667	209250	172080	174110	158450	143960			P56395	28113	NA	NA	NA	NA	NA	NA	NA	82808	119700
11_GL0109256	73144	NA	68147	114690	115110	101700	149080	121000	54989	76820			P56480	750080	719970	735270	770270	774240	773510	742570	707300	721920	740780
1-1_GL0110379;1-3_GL0065887	1348700	988320	NA	1037100	952740	914570	1019900	914000	930180	942640			P56677	208570	181770	25653	211610	156140	214090	57308	288090	217280	267160
1-1_GL0110595	203010	402490	119620	129230	147720	NA	51002	138780	241260	149090			P57716	139960	156110	205920	242330	200100	156230	187980	144560	168790	174580
1-1_GL0110655	236740	275120	221170	252530	172460	150880	139980	227330	178240	210130			P57780;Q7TPR4;Q9JI91;O88990	219940	210870	217150	226740	219910	201960	209170	210590	197000	210980
1-1_GL0111475	83903	84660	86784	NA	100700	110460	105330	NA	NA	120570			P58021	76516	77949	NA	67757	NA	85789	NA	78388	69546	77175
11_GL0111645;S-Fe20_GL0183304	105530	137050	110320	100160	95389	104130	95199	95492	96386	85875			P58242	536590	533740	337370	603770	614220	567410	536320	457800	661280	684150
11_GL0111646	NA	29476	39064	37512	46681	NA	NA	NA	NA	NA			P58252	169710	82207	94274	80794	91928	62668	64023	23415	94317	59066
1-1_GL0111812	18071	41480	35025	30869	40861	37419	48765	64256	63380	50410			P59108	NA	62121	54953	44907	36112	10374	NA	75099	NA	42582
1-1_GL0111814	132430	119850	94333	87357	104060	122900	124180	101350	98885	79059			P59999	62455	66634	64305	65912	60016	58866	55594	50824	50844	56419
1-1_GL0112011	64508	NA	245350	NA	251830	360670	407150	416310	261410	143230			P60335;Q61990;P57722	46885	53890	12154	NA	12128	NA	11227	NA	9931.2	NA
1-1_GL0113093	540350	528840	502830	461960	472840	494250	436540	462690	460130	452670			P60710	721970	674420	558950	634940	618350	548790	548240	572590	574770	582440
11_GL0113823	156210	100080	199860	248230	192070	259020	252740	241310	230060	273480			P60766;P84096;Q8R527;Q9ER71	111420	146080	91988	108670	79391	113660	112080	99842	137020	93087
1-1_GL0114159	35476	2610.5	NA	NA	30143	NA	NA	NA	39378	NA			P60843;P10630	254320	169210	115400	112770	96511	96198	89753	97726	117970	104400
1-1_GL0114166	181940	180490	173430	179130	157310	169390	175220	175920	170180	182960			P60867	NA	NA	39653	52009	NA	40244	38713	30364	36163	41952
1-1_GL0114553	363000	366970	192650	283780	250610	137740	76444	150930	247940	303180			P61022	35120	36833	33146	28103	34024	29005	30209	28313	30811	22701
1-1_GL0114862;S-Fe2_GL0161391;4-1_GL0044898	190720	183270	216690	169630	213820	153310	34080	160270	147110	147620			P61161	34415	32283	33699	39724	34368	19389	19626	50030	22499	27552
1-1_GL0115232;34_GL0017243;1-2_GL0048689	NA	204210	NA	200890	214470	264560	282910	NA	NA	NA			P61358	91953	121670	40352	58081	52493	51019	40783	46535	75190	18922
1-1_GL0115270	423980	407970	332540	460450	445190	518750	562080	500570	431760	417560			P61750	80929	97067	69517	79577	64778	55306	56284	31623	51487	58563
1-1_GL0116050;S-Fe10_GL0170082	110960	NA	113580	NA	79585	60106	69884	79394	88169	99008			P61804	NA	NA	82394	168500	NA	24345	75900	88453	NA	82208
1-1_GL0116892	NA	102800	119230	167580	NA	NA	129040	136330	172300	157650			P61922	256570	199750	227590	264910	211680	214680	280910	271230	227520	73393
1-1_GL0117012	31000	NA	5623.6	50919	9927.8	103330	126800	28521	17456	78595			P61979	116470	75555	6004.2	NA	37909	NA	NA	NA	39627	NA
1-1_GL0117261	NA	20232	40053	33915	NA	NA	49178	26016	12939	NA			P61982	71290	NA	NA	17870	NA	33713	NA	NA	NA	NA
11_GL0117532	83225	55083	86117	127660	88948	NA	69805	NA	53988	76240			P62082	42259	17305	11460	NA	NA	NA	NA	NA	NA	NA
1-1_GL0117667;S-Fe10_GL0031034	254200	252790	208660	157130	131570	169620	187580	179770	57173	171850			P62141;P63087;P62137	261160	82953	127580	149550	156890	159120	91182	149400	114310	191820
11_GL0118584	57634	62458	48789	61662	66701	61989	64768	61506	64115	58889			P62242	319820	142340	49368	NA	41320	203210	64983	NA	206490	55528
1-1_GL0118687	385190	398250	433550	471120	437580	377670	387360	360160	387710	334210			P62259	172290	98101	84398	69492	28860	62171	101000	61504	118650	63389
11_GL0120222	340250	427730	316000	281220	315320	331680	341470	379260	319760	302950			P62264	103730	89202	72593	71466	107180	65484	95602	93471	58816	72774
11_GL0120543	148130	148210	NA	161550	NA	130110	137050	138540	156630	102410			P62270	310660	252480	217640	184910	220000	235710	201570	206830	217590	212140
1-1_GL0121030	18227	15340	15454	14044	16075	14993	15086	18423	25498	25455			P62305	35417	NA	NA	22523	19557	19948	23128	NA	NA	NA
11_GL0121511;Group2-7A_GL0140882;G1-4A_GL0058602	312670	285180	309250	293720	293910	149440	339190	303640	208330	265380			P62309	37627	29529	72826	30455	48684	39424	NA	46360	31326	45771
11_GL0121666;1A-dyr4-07_GL0054274;G1-5A_GL0050443;3-6_GL0057763;11_GL0142670;4-1_GL0045516;1-8_GL0113440;34_GL0077571;11_GL0004982;1-1_GL0097553;Group2-3A_GL0133614;G1-1A_GL0065512;G1-1A_GL0023663;8-4_GL0050445;7-6_GL0012399;Group2-8A_GL0131983;29_GL0059643;2-2_GL0106418;10_GL0025680;10_GL0020849;G1-5A_GL0104094;5-1_GL0005641;4-2_GL0043514;2-3_GL0102263;Group2-8A_GL0084398;G1-7A_GL0058707;35_GL00…	496880	361490	89262	423240	NA	378260	306770	274280	335120	360410			P62331	NA	NA	NA	53993	60153	NA	57835	NA	NA	56142
1-1_GL0122179	106530	92994	114240	117740	103830	81635	101880	130130	115100	116080			P62702	126370	70318	64247	66950	63815	NA	56459	NA	19981	NA
1-1_GL0122934	477250	477510	445200	436920	446680	456140	446510	462280	470450	480140			P62751	128310	165440	114310	NA	117900	125100	119970	107550	109920	102130
1-1_GL0123182	50314	NA	NA	64832	51691	34127	71563	109290	75891	NA			P62806	2881800	3018400	2385700	2521600	2236700	2356700	2271700	2103600	2005500	1940800
1-1_GL0123183	94807	136960	83269	81432	79024	90792	76712	66793	75520	135060			P62821	169550	114970	109930	90679	66698	35228	52799	53485	82693	65002
1-1_GL0123184	1032400	1047000	991520	963710	975240	896520	944960	884690	914500	914030			P62827;Q61820	159170	135400	61691	43588	42987	NA	50294	49806	58776	45140
1-1_GL0123231	226550	243820	232490	233250	218340	245740	214090	236830	250710	256270			P62830	162680	89304	67301	72739	52807	52408	56350	51837	59108	47563
1-1_GL0123826	235670	260670	293270	263420	296860	368960	364380	375330	349020	324820			P62835	51485	26639	4842.5	27907	21644	14825	16219	33792	16169	14546
1-1_GL0123934	NA	26985	36783	NA	34583	67447	NA	22298	NA	NA			P62849	98637	61052	NA	46040	52210	NA	NA	NA	NA	NA
1-1_GL0124304;1-3_GL0119037;54_GL0001050;MH-6-4_GL0136450	NA	1299100	634080	NA	1628600	1328900	2305400	1299400	1172900	1987600			P62852	96504	57357	53847	51892	NA	44261	58064	45768	NA	57360
1-1_GL0124334;G1-8A_GL0058816	520720	414570	299210	311850	380540	276300	295780	255440	367410	280440			P62855	NA	31363	NA	37459	NA	27309	35506	25846	24282	NA
1-1_GL0125402	191140	168410	254480	257060	152790	226790	289060	266190	274470	249870			P62858	114280	NA	NA	101940	107220	NA	NA	NA	NA	NA
1-1_GL0125549;G1-1A_GL0096895	178260	175940	180120	175140	190590	166620	194360	189490	195390	190590			P62874;P62880;P29387	61467	154820	120590	99690	95081	49376	91560	NA	96361	94165
11_GL0125565	1529300	1379400	1424400	1286200	1358100	1288500	1222200	1253600	1293900	1248200			P62889	77910	77945	129310	NA	113740	121790	125560	98538	110440	121250
11_GL0125782	276340	270220	278070	294360	293460	271350	267290	245260	279640	255140			P62897;CON__P62894	505260	403710	535640	473610	434080	311440	342690	306440	309750	384190
1-1_GL0126511;S-Fe20_GL0042994;S-Fe2_GL0030158;47_GL0058974	181410	186830	253620	189350	197720	197490	249630	140310	317850	342230			P62908	NA	163730	500640	138920	242670	476150	196640	402490	48457	NA
1-1_GL0127751	75046	53220	NA	NA	48490	74466	74724	NA	87547	NA			P62911	NA	30973	NA	28583	24881	31621	13014	NA	58171	29546
1-1_GL0127858	138220	155560	137050	137190	119320	147470	144550	141900	132830	135610			P62918	39359	37026	31255	26149	27463	28584	37723	47140	34454	36620
1-1_GL0127859	NA	93925	NA	99320	84812	NA	NA	NA	89097	89935			P62984;P62983;P0CG49;P0CG50	1571500	1382100	1320300	1255100	1298300	1557200	1296800	1348800	1120900	1348200
1-1_GL0128445	615100	580950	532800	556270	548100	529910	561630	574370	591620	564120			P63001;Q05144;P60764	194950	153960	188670	171940	172190	162890	173220	177360	176750	182140
11_GL0128752	6892100	7485400	6355900	6433400	6394900	6141600	5977300	5682000	5715000	5391100			P63017;P17156	664740	617420	555470	515840	522870	515010	559840	561370	534000	529320
11_GL0128753	680930	773120	670800	682440	643320	679930	664960	651620	609640	662370			P63038	142550	112200	128710	120010	116930	132800	129080	128070	136100	97655
1-1_GL0129407	180910	166920	168540	160430	159460	166420	167380	186790	174730	166960			P63082	82443	47961	152130	196400	174960	159390	153520	181300	149010	184520
1-1_GL0129836	72067	38078	NA	90356	84804	69360	67662	57988	59519	78651			P63101	407100	284750	241660	241180	215320	232810	207440	209340	208740	224020
1-1_GL0130386	117720	116440	117580	119390	116640	105920	119480	107880	116590	106860			P63260	2922400	2678100	2236200	2189100	2127400	2079700	2087700	2083200	2214900	2188800
1-1_GL0131296	209040	207750	268470	197340	174910	211960	126700	195270	179390	225040			P63276	NA	NA	NA	NA	40698	NA	14750	NA	12428	17965
1-1_GL0131432	547150	544910	522750	509310	480300	517610	507560	500150	439160	584890			P63321	33592	65000	57203	53986	61915	69729	60103	90510	50823	76085
1-1_GL0131480	NA	126450	55003	NA	184160	123650	182340	NA	142210	NA			P63323	92491	NA	NA	NA	4515	4223.7	NA	NA	NA	NA
1-1_GL0131531	99455	95572	123410	NA	145040	126590	82928	NA	NA	NA			P63330;P62715	92408	NA	46928	70662	NA	72745	59848	58272	64278	78691
11_GL0132807	69448	137380	128120	216180	46036	189580	189970	209020	51083	82609			P67778	96690	64223	36839	30253	42254	44019	50169	50563	56667	26948
1-1_GL0133105	137730	132830	139010	100550	100380	122440	118450	128310	134270	153230			P67984	24635	30620	23365	13982	NA	28394	25543	1219.5	14168	22988
1-1_GL0134047	198720	193660	198570	181940	180090	204790	177550	188220	196530	200910			P68040	577010	277370	276070	176040	232060	261760	280220	263830	271720	247130
1-1_GL0134181;17_GL0042801;S-Fe12_GL0013246	338450	365750	331440	321590	302730	320030	317250	312540	306880	304020			P68134;P68033;P63268;P62737	2009600	2123500	1914600	2120600	2054200	1992100	1854300	1926000	1937900	1701400
1-1_GL0134521	310180	257750	314670	261360	336490	335090	278790	288950	307010	338940			P68254	70400	72426	47015	46563	44067	57166	60570	58988	63774	57199
1-1_GL0135073;6-6_GL0125700;7-8_GL0069765;5-6_GL0090238	NA	79951	116740	115340	116650	142590	134820	165260	111300	142280			P68372;Q9D6F9;Q922F4;CON__ENSEMBL:ENSBTAP00000025008;A2AQ07	355730	272140	210350	201360	226210	199810	187870	202460	118230	150950
1-1_GL0135235	833390	574810	577370	628580	571840	521220	590830	623220	521990	631600			P68373;Q9JJZ2	112170	81060	76351	NA	78575	70603	67326	78940	88759	NA
1-1_GL0135247	42390	25710	27236	55962	27826	40867	60525	75363	54402	70547			P68510	64717	102810	32278	NA	112610	NA	123090	126130	118700	138910
11_GL0135547	154770	128610	90295	120650	79347	92615	93263	96196	103320	124720			P70158	66292	74590	71925	79075	62147	76349	65238	78679	65382	61695
1-1_GL0135553	691880	640640	582190	633290	588190	567500	557210	567440	533900	561100			P70202	41055	45785	62710	54097	36233	50441	57105	64765	61842	70696
1-1_GL0135577;5_GL0164578	103790	NA	138220	NA	NA	NA	59317	161620	NA	163210			P70296	79034	70203	92048	152800	113260	106010	NA	131390	77215	88557
1-1_GL0136144;1A-dyr1-07_GL0036169	466770	265010	330300	411250	351180	374840	323810	384690	376690	173000			P70333;O35737	41504	37270	NA	NA	6895.6	NA	NA	NA	14954	NA
1-1_GL0136841;MC-6-4_GL0039328;S-Fe17_GL0096003;MC-6-5_GL0002992	46369	16753	57820	53740	7299.2	59349	124660	61376	NA	48345			P70412	3936000	3967600	3921200	3614600	3710000	3483100	3515500	3491900	3444300	3394800
11_GL0137061	133750	138430	104820	85222	87161	101030	91711	85441	92820	70497			P70441	299190	260880	209100	226200	191860	184480	233420	209440	221530	270430
11_GL0137082	81633	97857	121290	107710	138070	134020	119330	121010	130280	135390			P70451	141760	NA	NA	NA	109580	108150	194630	167180	206160	163120
1-1_GL0137416	129420	162790	180520	167620	171280	213000	177800	145440	141950	190720			P70665	165490	172910	150100	153800	148260	146090	142940	142670	137190	142500
1-1_GL0137633	239890	246050	226380	209550	189230	222100	202180	209320	256320	242370			P70677	85952	NA	NA	17182	64951	255420	24338	130960	4694.6	134050
1-1_GL0137848	108070	54755	84698	42594	99801	100500	10756	48520	NA	54725			P84078;P61205;Q8BSL7;P84084	507150	402340	392680	390240	338180	401120	341740	332480	377690	382630
1-1_GL0137880;MH-6-2_GL0004454	154440	149870	143530	154170	150560	149050	153540	152080	143720	161580			P84091	2261800	2244200	1924300	1949800	1768700	1913900	1863300	1682100	1807400	1790300
1-1_GL0138491	1327600	1452400	1588900	1520400	1500500	1643400	1556700	1401100	1460800	1642300			P84099	209190	216950	121310	160620	180580	140700	143590	140230	136930	130020
11_GL0139065	673600	599380	714430	778060	727350	742840	754660	885340	785220	910790			P97300	74051	93226	76441	80630	82208	83530	95475	102700	101990	108330
1-1_GL0139144	17256	NA	127790	NA	NA	NA	38607	NA	NA	NA			P97351	79607	63778	24703	63808	NA	25926	11687	27077	NA	19736
11_GL0139318	710850	447860	570500	616850	606660	530240	557520	566210	539250	583460			P97384	486960	529710	469210	479870	504080	489500	470560	455740	417900	417240
11_GL0139331	248110	291830	238410	210530	231350	212440	224390	193300	NA	NA			P97429	1982300	1977100	1929300	1992700	1824700	1912000	1937500	1812300	1882100	1954500
11_GL0139734	108990	85105	103670	NA	NA	51379	112250	3149.2	115700	NA			P97435	136390	153440	169610	162020	188280	217630	203530	165730	153590	184650
11_GL0139858	486330	446430	423280	490920	428290	351060	336410	343840	355240	402580			P97447	99241	71374	111000	97252	91227	143530	91861	66625	113980	77258
1-1_GL0139949	163650	177610	160750	145990	145620	159930	139810	154840	135720	147840			P97449	6961800	6338300	6503700	6442300	6480900	6142600	6303100	6211500	6311900	6089400
11_GL0139961;6-3_GL0062463;2A-dyr16-07_GL0071629	561630	522340	616350	435380	606860	623860	538350	497940	640960	676480			P97742	80590	65100	101810	128200	38157	115160	NA	86650	84109	96802
11_GL0140125	31806	25391	27432	23493	21745	NA	20756	23041	22974	23368			P97792	141270	NA	151650	138600	174710	142330	166440	153070	148990	172940
1-1_GL0140275	763460	781450	720610	701220	663450	581150	698960	753670	719070	709710			P97807	67510	207940	189140	171710	154620	174040	187840	122080	162200	194620
1-1_GL0141547	877120	978550	874480	NA	3264.2	NA	688440	873950	633660	901750			P97821	346410	440750	291130	421100	275070	241180	337800	324340	281230	NA
1-1_GL0141548	1025900	1090800	821110	924160	1000200	869400	902520	844820	852980	896130			P97864	22577	22776	10788	36968	32100	NA	31110	60349	44571	54273
1-1_GL0141549;S-Fe9_GL0216320;S-Fe9_GL0104873;MC-6-2_GL0032211;4-3_GL0000037;1-1_GL0081980;10_GL0033898	162250	235900	228450	255930	273750	279090	314990	303460	341340	371830			P99024;Q9CWF2;Q7TMM9	220220	183010	135570	NA	NA	119660	NA	93067	39749	NA
1-1_GL0141625	NA	NA	NA	NA	80275	NA	63770	77802	NA	NA			P99026	192690	122620	69755	NA	NA	NA	164860	92465	202720	183260
1-1_GL0141631;G1-1A_GL0026944	231390	468020	105680	26125	133840	227180	130510	105730	219040	NA			P99028	18158	15035	29262	NA	47266	47808	46451	46171	47771	53993
1-1_GL0141777	629650	662330	624660	577270	571950	569010	583470	576210	542900	577460			P99029	36661	19209	20995	15886	18740	34602	19831	14243	20089	18542
11_GL0141839	70322	97563	74186	86032	76873	76392	NA	78607	62953	30204			Q00519	69479	53652	38391	60719	70222	45602	67902	9938.7	57515	36878
1-1_GL0142511	192510	208080	211990	196730	215840	193680	192420	176820	191430	184950			Q00896;P07758	669910	625080	552310	509140	551880	592090	573400	569170	609460	559500
11_GL0143116	236290	247870	185430	283820	181720	234010	197440	206330	196140	234980			Q00897	357590	372280	364390	337300	342350	331780	416810	410120	375650	367880
1-1_GL0143497;Group2-8A_GL0231745;Group2-4A_GL0039847	126240	133510	140980	208410	180900	159670	246330	213890	268350	256410			Q01768;P15532	422930	295010	272270	260340	254140	267730	264190	320720	281560	253690
1-1_GL0143705	213030	192720	314200	350840	339390	340750	375220	343100	302700	366240			Q01853	355930	344950	292410	266100	273340	257000	257960	239600	257280	258230
1-1_GL0143854	65492	71894	61731	59023	64101	69819	62540	65711	75436	68898			Q02257	49155	22232	51468	15247	27097	33810	17613	29976	27544	35572
1-1_GL0144133	48650	147420	189120	101680	138000	140520	79608	109450	121710	137040			Q03265	760330	743070	684910	641980	661460	632660	646740	628900	609300	659220
1-1_GL0144661	162390	124490	NA	110280	103520	33940	93222	146890	70054	108460			Q03401	222300	210000	205230	155200	158910	138510	122940	142470	136710	147040
11_GL0145605	27596	32068	27227	29828	21670	30824	32046	33172	28824	34284			Q03404	258870	259970	258770	234920	235880	247590	249140	242040	240210	260430
1-1_GL0145833	99442	180200	162380	176240	216390	246780	192500	232700	191320	207760			Q03734;Q6P4P1	82448	36215	51960	51413	66851	66099	69190	73474	74032	26714
11_GL0146124;38_GL0076358;MH-6-3_GL0061014;MH-6-3_GL0025839	319780	279710	446640	344350	352920	380550	313810	325060	285660	314360			Q05117	17186	53820	NA	NA	NA	NA	NA	NA	NA	NA
1-1_GL0146495	629090	672670	632610	562500	568410	550780	568120	632460	590730	592340			Q05920	69295	60902	68630	NA	66535	68053	75782	69359	83400	99527
1-1_GL0146614	145070	149140	178820	136690	179740	159970	116790	139680	147930	181490			Q06138	47592	59586	63236	64598	49831	60539	58918	56218	42278	47350
1-1_GL0146646	43684	64367	54366	37549	67886	73158	82578	111380	96222	83265			Q07076	219510	234990	210050	187450	192600	231570	219290	221120	210140	221130
11_GL0147059	857110	956200	1044200	302020	378760	1189600	1141500	743090	872780	636170			Q07417	148690	87970	159710	204570	147250	168110	159460	162890	172630	149050
1-1_GL0147539	483320	473910	426530	410910	411800	403890	386260	393610	405810	422180			Q07797	339800	309990	347460	360170	350250	326240	365830	334170	340510	369560
1-1_GL0147731	200670	202010	200680	188680	191020	179420	182600	193160	192630	192310			Q08189	402780	382910	393730	317250	294030	367020	370660	373180	487700	423550
1-1_GL0148132	181030	113400	117420	109490	95518	121720	116940	104080	101250	113830			Q08509	76529	NA	156050	NA	NA	NA	14067	135750	NA	NA
1-1_GL0148426	59757	104620	93376	108860	86549	91652	86280	87097	92502	117420			Q08731	673120	616550	594800	809140	741480	685550	765390	660040	771420	755840
1-1_GL0148995	43778	NA	46031	45037	43323	43173	36321	36161	31292	34884			Q09199	NA	141820	NA	96505	NA	101530	NA	NA	NA	NA
1-1_GL0149091	74362	94573	54091	66663	63630	67175	60085	49186	60770	69163			Q0KL02	961530	642920	750240	741610	645550	506550	471200	469690	487940	480250
1-1_GL0150115	121060	77546	77126	NA	89671	84056	109570	162740	65181	93380			Q0VG18	78832	75841	69818	68069	74769	68891	61603	74523	64039	51123
1-1_GL0151547;1-1_GL0072113	37394	NA	NA	NA	NA	NA	32302	33286	NA	55415			Q11136	1157600	1067600	1089400	1134300	1082500	1093600	1090300	1110100	1129300	1102100
11_GL0151721	145700	NA	199030	NA	NA	NA	163380	163640	174260	NA			Q3TD49	949850	1020600	721970	1179900	NA	772660	820570	781140	1103600	711240
11_GL0153043	78388	86309	NA	106980	169790	89059	92126	78648	21175	103810			Q3THE2;Q9CQ19	219250	133060	143530	109450	180440	171490	207690	152820	213230	194730
11_GL0153063	377710	389780	368580	277200	317080	328920	365000	343250	345610	330260			Q3TIW9;Q8BTJ4	1366400	1268100	1447200	1430000	1411300	1344000	1353700	1319700	1347900	1268600
11_GL0155660	641740	528010	518490	532740	457840	514960	570040	497220	606040	537000			Q3TMQ6;P97802	536020	433700	178150	538140	504420	331800	321610	322200	393970	342320
11_GL0155661;6-7_GL0104531;1-1_GL0082828	177140	191920	157650	159880	206450	183710	165580	134680	148270	138840			Q3TTY0	530310	458810	609250	649920	643150	602470	603640	558030	612590	627220
11_GL0155826	108390	105440	98048	94127	89719	104060	95460	92287	101660	100930			Q3UJU9	8728500	7491700	NA	11495000	14555000	NA	16684000	10638000	12604000	18189000
11_GL0155893	99085	138610	115560	140930	111560	142500	143560	189190	153050	239650			Q3UQ44	47756	55789	39385	48822	20344	49567	40427	30299	49276	37164
11_GL0158489	321890	359620	329620	147420	281910	211150	253850	197690	251850	237670			Q3UV17	1099400	NA	940810	1147900	1052600	1039900	1058700	1035900	1040300	1044800
11_GL0161434	2571600	2483500	2257400	2184900	2202600	2143100	2134000	2074400	2005200	2031500			Q3UVK0	81855	72951	70089	80977	82846	54356	41308	78468	9832.5	33013
11_GL0162060	60403	50491	74669	92933	43215	94309	47852	96012	91956	95593			Q3UWA6	151490	164750	197950	151230	124410	100190	125520	119200	135960	131080
1-2_GL0002789	1978800	1750400	1782500	1889200	1590500	1741600	1773300	1877400	1609000	1720200			Q3UZZ6	24514	54570	62619	105380	96629	75984	48180	74729	80568	97372
1-2_GL0005357	127900	85377	115540	107430	111730	114190	82134	118300	130890	128120			Q3V0K9;Q99K51;Q61233	181380	230560	204250	214890	186600	192290	206610	198240	209300	222860
1-2_GL0005685	454710	447060	445040	478700	421360	414060	442380	421750	427680	439860			Q45VN2	3539200	4700600	3940200	4214300	3598500	3926000	4051100	3831600	3920800	3883700
1-2_GL0008025;3-5_GL0100291	53711	70865	43852	62427	NA	63127	42413	60668	NA	NA			Q504N0;Q6P8K8	740880	735090	807030	786600	785540	772430	764020	715750	701380	714370
1-2_GL0009417	93559	102480	110090	96199	65395	85325	88110	91392	85750	69904			Q571E4	65231	56526	58515	62948	54271	52927	53796	50005	49366	49790
1-2_GL0010842;5-8_GL0023725;1-8_GL0094007	47305	54076	45466	42122	51566	61384	55713	55250	55964	23967			Q5BKQ4	225180	207970	183240	133560	179310	189760	160750	182200	220400	161370
1-2_GL0016841;MC-0-1_GL0059229;Group2-8A_GL0061048	131170	NA	165110	159870	NA	NA	187010	NA	98422	NA			Q5F226	224620	181880	276880	NA	223120	262620	NA	NA	NA	NA
1-2_GL0016953	2879000	2879400	2824000	2957500	2865000	2874200	2746800	2811800	2847600	2830200			Q5M6W3	NA	NA	NA	166600	NA	NA	NA	NA	NA	250060
1-2_GL0017647	91200	114560	90057	73381	95217	102190	133520	82273	117990	116580			Q5SSH7	25424	41465	28599	24059	32253	27485	NA	36312	34996	20905
1-2_GL0020540	77481	100940	143480	114180	142980	156260	134430	139860	139760	142530			Q5SYD0	59795	53312	NA	45043	43826	57172	49562	40402	37921	47751
1-2_GL0020777	NA	260310	310090	NA	118490	NA	277660	NA	265020	243330			Q5XJY5	51079	68135	63940	64511	75353	63101	57093	68876	50213	56606
1-2_GL0031972	90698	125830	112110	63779	125140	77541	95218	245910	201670	127540			Q60597	45336	59671	66227	80206	74234	80031	83415	65858	74070	76532
1-2_GL0032701	182500	170660	177580	183800	152240	127310	136460	133820	167260	152070			Q60604	35434	36391	43199	47612	49093	48556	49003	44960	40229	48930
1-2_GL0033820;8_GL0141891;S-Fe3_GL0202097;20_GL0139225;1A-dyr2-07_GL0018295;26_GL0008793;S-Fe7_GL0269252	45995	31258	56445	NA	60077	47452	75863	NA	70827	69709			Q60605;Q8CI43	60740	125260	42801	138950	129680	20170	46654	71328	19900	220880
1-2_GL0038806;1A-dyr4-07_GL0102309;11_GL0008659	75711	94597	62718	66564	71886	63160	61516	40146	59537	72469			Q60692	243370	54392	179930	223040	135000	198900	184940	275130	91329	209850
1-2_GL0041485	200780	215160	148760	164310	154530	157850	NA	207070	180120	229380			Q60854	2146100	2255500	2262800	2279100	2223700	2193900	2210900	2124700	2129800	2120900
1-2_GL0041958	46714	61303	40320	51513	NA	NA	NA	42116	NA	NA			Q60928	119800	145210	141160	127840	133600	116830	134840	122570	133450	146430
1-2_GL0042023	175720	163150	235030	NA	225720	249700	232920	NA	198050	274840			Q60930	518600	523100	522220	480420	474350	500750	478100	479450	487820	496340
1-2_GL0042922;1_GL0048916	59038	36997	14669	93568	152380	166320	106680	12671	66376	NA			Q60931	347500	382300	364460	374380	345500	375850	358870	513470	340860	357610
1-2_GL0045795	30899	23004	45310	83461	21489	35917	31183	38858	42179	48853			Q60932	358930	351540	298040	312680	298610	294420	269060	281610	294460	272290
1-2_GL0046009	56332	60561	67547	69138	61518	70018	68972	66069	66363	62057			Q60997	8988500	8736700	8599900	8819600	8560200	8170200	8166000	7852000	7857400	7668000
1-2_GL0046791;S-Fe10_GL0131129	142180	89805	132200	143960	151150	118380	156080	120000	119880	122040			Q61062;Q60838	339380	NA	345530	361840	348980	393130	391780	344590	NA	302890
1-2_GL0047207	94353	89838	76216	46616	57050	82309	122820	78819	123230	81917			Q61087	NA	NA	79233	295670	149120	NA	132010	NA	NA	57362
1-2_GL0047570	21174	20155	21312	17670	15911	22902	18360	19468	17239	19564			Q61171	70833	50060	39970	43462	39061	41083	36248	44255	39881	52647
1-2_GL0053997	149070	146810	101620	132040	128180	123690	125060	118610	124080	115030			Q61247	85257	93322	101170	87730	108470	95157	101470	99142	89067	109420
1-2_GL0055961	3146.9	71588	NA	NA	68182	57556	59098	66675	NA	69530			Q61391	1019200	1056800	1108300	1067200	1131500	1066600	997860	1047600	1058900	1032600
1-2_GL0056317	158540	141820	205160	230730	211620	253010	221300	234400	206860	181660			Q61425	133940	151050	146960	138190	147230	133110	123160	130600	124430	123820
1-2_GL0056517	73321	81937	65246	62105	63955	73810	64332	72767	49067	74838			Q61503	222150	148120	198580	153080	135420	233500	267330	214650	184250	238200
1-2_GL0056607	62491	21758	62947	NA	56647	74328	41726	39581	76356	78230			Q61598;P50396	1415600	1180900	1162300	1211500	1136600	1155400	1284000	1187100	1060000	1198000
1-2_GL0059967	NA	129580	NA	71483	NA	NA	NA	NA	NA	NA			Q61696;P16627;P17879	231780	227900	222510	192570	194620	203830	210610	227010	217800	226510
1-2_GL0059978	80931	103450	94561	121350	114500	118910	122510	109320	123530	132560			Q61739	122510	117020	145140	NA	120200	135120	144070	138830	166480	171280
1-2_GL0061797	318850	270010	305420	313080	301040	307580	299350	313200	318630	318940			Q61847	2974800	2866300	2780400	2828700	2861400	2909900	2936000	2940600	2884100	2896000
1-2_GL0062480	NA	28412	46472	40472	NA	45653	NA	238160	NA	211460			Q61937	183690	148590	124160	NA	126660	134470	118430	147430	108720	170980
1-2_GL0067118	NA	25168	NA	236060	163200	144320	NA	88095	NA	83747			Q62087	140990	149370	170940	196100	171830	168230	152070	152230	142180	159710
1-2_GL0072935;MH-6-1_GL0132097;MH-6-2_GL0010405;S-Fe9_GL0077283	122270	110950	127810	108970	108150	126220	128510	141150	119280	135550			Q62261	277810	81508	137360	127140	31043	28004	146180	121790	241900	160160
1-2_GL0077649	41972	74387	55501	46380	45291	45206	60816	27713	NA	NA			Q62395	636470	608600	714670	521970	564730	596250	573410	602510	619860	611930
1-2_GL0078660	1023500	251120	550890	565840	186760	372660	539850	590210	394300	437320			Q62468	581260	519470	538720	520980	507840	486520	493450	491450	486890	482840
1-2_GL0080622	202220	NA	125020	89904	112960	91266	25407	NA	NA	NA			Q62469	NA	70101	35208	NA	46964	NA	59366	NA	NA	NA
1-2_GL0082121;MH-6-5_GL0040014;8-5_GL0000196	209960	111280	32987	151780	127450	126480	186930	166860	164500	79463			Q62470	65805	91907	18749	55878	120810	102410	263330	154750	227320	167950
1-2_GL0083818	67465	80153	107300	90180	63391	102960	91545	90639	118380	136600			Q62471	119380	53869	102560	117800	110350	192470	115080	168660	176180	NA
1-2_GL0084271	362760	329510	312340	309240	283590	299710	361500	337300	316330	332270			Q63886;Q62452;Q64435;P70691;P17717	116220	85469	98411	104270	96276	94739	96728	97132	104280	102690
1-2_GL0086064	237630	285960	214220	228850	271720	269510	224330	248040	214650	204920			Q64133	598600	570140	506640	538550	500020	526070	500810	486730	455380	474910
1-2_GL0093285	102900	NA	NA	79238	NA	63132	95217	NA	NA	NA			Q64191	134480	296310	NA	NA	NA	22469	NA	NA	192540	NA
1-2_GL0094249	38097	44414	50295	43278	42800	54670	42091	40045	NA	49118			Q64277	170460	106980	199270	235540	166100	223540	241900	209960	240450	239460
1-2_GL0095419	170700	160850	170110	156270	133400	126790	151560	148680	188240	157490			Q64285	115910	125680	110250	110460	99472	90130	92191	92745	92616	85975
1-2_GL0095952	748450	717430	695940	698900	643410	622850	663000	602170	616560	612800			Q64299	68796	78691	75128	65414	65182	57701	65024	67237	56085	64489
1-2_GL0098312	86692	86789	84423	87024	78467	84630	83650	82152	72295	76193			Q64444	337830	310500	307000	295000	299670	272130	303300	290930	281630	324910
1-2_GL0098314	44328	42724	40741	31999	40110	41008	39146	39100	40549	43346			Q64521	271170	244900	271490	293280	280850	251380	311100	292620	285420	257900
1-2_GL0098677	37438	57497	27580	NA	101670	NA	83802	59861	18888	NA			Q64523;Q6GSS7	4889.8	NA	5094.2	NA	5719.5	728750	NA	7565.5	NA	NA
1-2_GL0100942	1146900	1263800	1141400	1165000	1138200	1238000	1214300	1182200	1109300	1137800			Q68FD5	107890	71661	121290	111300	94053	92775	83308	132590	106090	84311
1-2_GL0103656	66626	37437	30485	34415	42821	42248	56750	52661	63258	48487			Q6DYE8	691700	667740	673510	692700	667190	700800	731640	648030	629190	637810
1-2_GL0106009	326300	338170	332510	344320	322410	296060	309980	301740	308860	302010			Q6NSR8	309490	315480	111460	327790	115050	146640	138700	133240	158350	138310
1-2_GL0106369	1636900	1694500	1705800	1859000	1873000	1845200	1816200	1842700	1907200	1822400			Q6P6M7	65873	72288	70148	62382	70268	74958	74125	71470	66137	67287
1-2_GL0107126;5-8_GL0032106;7-5_GL0152446;7-8_GL0074757;Group2-8A_GL0042327;MC-6-2_GL0088060	240430	205100	242430	232480	195430	208860	207530	175680	199320	202310			Q6P8U6	7588800	7028800	7880500	8098600	7922400	7638200	7399300	7315300	7119000	7488600
1-2_GL0109440	99726	84947	70627	65794	58496	68612	55398	52722	71553	58588			Q6PZE0	125230	142380	132170	110270	101110	129400	126120	133020	131500	127020
1-2_GL0112586	63196	57059	63908	77610	43814	49185	49570	56288	45850	15233			Q6Q473	3584100	3691000	3408900	3605700	3388100	3385700	3354800	3439900	3376700	3478100
1-2_GL0113032	144200	139370	137780	130200	149690	130350	148100	130830	155820	135380			Q6T3U4	141970	157350	118420	202720	183660	274160	224470	191080	228150	209890
1-2_GL0113170;G1-5A_GL0020141	101420	105640	114590	116360	120600	182430	106500	90503	108810	84983			Q6UQ17	164190	146960	134280	129920	134960	135330	135030	136010	134700	131450
1-2_GL0113171	939010	1183000	918630	874470	870730	785370	803100	768040	800710	799610			Q6URW6	83447	101570	123670	74386	115020	133630	85436	104350	70549	102060
1-2_GL0113636;MC-0-1_GL0113705;MH-6-5_GL0055981;MH-6-1_GL0066174;MH-6-2_GL0057252	86911	92804	85757	113940	150370	141110	84132	133500	127310	140640			Q6X893	NA	70373	105570	98810	84086	87818	95380	91985	94074	85091
1-2_GL0114244;4-6_GL0051640;3-2_GL0000386;3-1_GL0075579;1-1_GL0144691;S-Fe2_GL0016290	4931.1	124360	110540	93954	117820	157870	189990	185950	146700	157480			Q6ZQM8	300810	346750	288710	275320	259080	286930	305670	283590	288230	273550
1-2_GL0115398	76746	70812	68679	67635	69845	61337	73221	61189	70225	86053			Q6ZWN5	73164	69394	45094	41171	55591	46271	45118	51597	45462	56802
1-2_GL0115399	98142	NA	108570	NA	119750	93409	NA	NA	99378	NA			Q6ZWV3	35960	37234	NA	NA	NA	NA	NA	NA	17365	NA
1-2_GL0115428	194280	215780	235990	196920	209720	247730	241860	229840	323890	277410			Q6ZWV7	63750	48564	38725	33887	62762	57373	51957	48832	54500	47700
1-2_GL0115758;Group2-8A_GL0085366	95526	103680	94404	68320	98745	91200	84984	92487	92993	84339			Q78IQ7	NA	NA	395320	NA	NA	NA	NA	80997	NA	394830
1-2_GL0120539	60652	67468	73272	56127	62228	65010	73855	67207	77963	65465			Q7M758	3630500	3371700	3648500	3722400	3596100	3515700	3415300	3415600	3375100	3526100
1-2_GL0124113	287640	298250	461220	283180	424000	243570	268610	303270	247020	264720			Q7TMF3	26994	26688	25545	26274	22622	22406	22553	17873	23344	22642
1-2_GL0125028;1-1_GL0014250	86866	125770	170580	82421	100390	54311	141900	106670	96413	150950			Q7TMK9	60684	86943	9674.9	7998.7	8099.2	5926.7	NA	9690.4	4657.3	13281
1-2_GL0125305	NA	NA	196480	263190	NA	209550	NA	NA	NA	197900			Q7TMR0	30065	NA	NA	43689	NA	NA	29439	46407	39434	NA
1-2_GL0126345;1-2_GL0125347	116200	148620	134040	124620	132960	118990	139050	116310	124250	127950			Q7TMS5	58930	55682	58596	47053	47177	44218	40511	39197	39383	57259
1-2_GL0126346	115580	120440	156160	143960	142780	177340	163980	165840	206060	160900			Q7TPZ8;CON__Q2KIG3	7396100	6881800	8004400	7778300	7901600	7262600	7283500	7200200	6654200	6587600
1-2_GL0126797	276250	217930	317820	383280	368170	282350	277270	284330	167790	319860			Q7TSG1	207580	217870	140850	158260	172750	NA	NA	164840	149460	183950
1-2_GL0128806	41228	NA	45435	52444	49459	56749	56092	51638	51796	54660			Q7TSV4	11205	NA	8739	NA	NA	NA	NA	7224	13918	32393
1-2_GL0128995;7-8_GL0086080;Group2-3A_GL0005562;38_GL0071201;1-1_GL0104563;MC-6-2_GL0075820;8-1_GL0083732;32_GL0120672	1255700	956890	1147800	1038800	1047800	1116100	1158900	1072300	1127300	1113000			Q80T03	120980	126300	116580	114370	126060	130310	103010	120810	80926	122260
1-2_GL0129193	123800	86231	133930	133300	132870	110400	61625	94504	91104	92717			Q80VA0	29315	21260	27226	27347	22978	23165	22820	25221	23804	29641
1-2_GL0129635;5-5_GL0127696	NA	167450	186770	NA	NA	137570	164240	NA	65108	NA			Q80X90	437440	448400	367150	339580	302810	351410	372160	356100	371210	345050
1-2_GL0129656	54629	62731	65797	54510	56865	60070	55732	77536	52380	58156			Q80XN0	154360	120770	143560	138270	115840	149510	171250	98937	142090	197130
1-2_GL0129659	190350	128670	132110	175280	149910	201850	214010	216760	158390	229240			Q80Z19	8274700	8572600	8336800	8491300	8345800	8502700	8515200	8479200	8254300	8414800
1-2_GL0130010	216490	211640	211480	247080	245500	189750	190950	195820	179050	177550			Q8BFR4	NA	NA	NA	127000	165390	162550	215690	NA	215330	150500
1-2_GL0130912	218890	213590	207460	214370	214000	207950	205820	223940	192200	221710			Q8BFR5	122310	72601	90516	83116	78707	90458	52475	84747	43771	97171
1-3_GL0005317;G1-5A_GL0040735	202330	78423	251350	166790	225510	320040	261460	232570	269600	249870			Q8BFZ3	5284.4	NA	49714	NA	NA	NA	NA	3458.1	NA	NA
13_GL0007091;5-5_GL0093836;MC-0-3_GL0029057;MH-0-4_GL0087531;23_GL0048466	188910	145880	176030	148180	147080	161010	131200	163340	136440	164330			Q8BFZ9;Q91X78	244740	247380	327300	234960	273890	241350	253570	296780	281330	295780
1-3_GL0011727	401220	436440	424110	408760	277050	312260	410540	304640	385220	246070			Q8BG05	67994	NA	NA	47489	16599	33024	NA	NA	NA	NA
1-3_GL0011731;MH-6-2_GL0050618;3-5_GL0053195;20_GL0090887;1-1_GL0020214;S-Fe8_GL0232913	71260	96523	72704	59825	61417	73517	64606	61801	65851	55212			Q8BH95	NA	27297	60755	61033	78486	62389	64262	71558	78968	69762
1-3_GL0015145	256530	273040	252870	218100	192040	263180	NA	238390	222550	280880			Q8BHL4	155390	176700	157160	176000	164330	215730	164210	151480	9958.7	196850
1-3_GL0017605;Group2-7A_GL0014189;S-Fe2_GL0094361;7-5_GL0192219;3-3_GL0086338;5-8_GL0107180;8-5_GL0085606;MH-6-5_GL0047955;3-4_GL0027057;6-6_GL0013566;MC-6-2_GL0021972;Group2-6A_GL0031804;S-Fe20_GL0113895;5-7_GL0056912;MC-6-5_GL0079780;MC-0-1_GL0048719;G1-6A_GL0074484;5-7_GL0081956	82822	94268	42206	118850	112820	95458	104150	72779	92294	91505			Q8BHN3	2957.7	51446	74886	34213	60310	58636	64790	48279	9206.4	23602
13_GL0028689	127830	188300	109780	125010	115020	32776	51589	44350	11003	34678			Q8BJ64	NA	NA	NA	55428	NA	71313	60035	68457	NA	58847
13_GL0030246	595700	577880	562880	560550	568920	579680	583280	574780	569870	581030			Q8BJZ3	27967	NA	27440	36528	35482	34705	35290	38441	29430	36818
1-3_GL0031323;13_GL0004268;1-2_GL0043599;23_GL0065033	153740	155000	128030	128360	121390	223520	182540	202350	163690	136290			Q8BK48	377910	365690	307360	343830	321770	340000	312520	315490	333520	351680
13_GL0031459;S-Fe7_GL0291283	520450	443090	414100	430300	402070	347040	399370	391570	426210	315370			Q8BM96	157640	157530	160370	152190	145870	164220	151400	170550	158780	154480
1-3_GL0032164	81057	76449	65282	61864	55452	76245	48585	93897	85273	86359			Q8BMD8	56704	59178	61762	68793	51874	55640	50382	53012	53209	47520
1-3_GL0043265	154430	154620	127240	248850	175160	152460	174940	168020	172850	174420			Q8BMF4	55997	61249	57860	57977	55374	50750	55751	48269	60461	59787
1-3_GL0044776	304940	310210	271580	299930	264170	288650	262300	266630	277860	279320			Q8BMS1	101710	104990	126180	142730	150530	82668	127390	98549	90289	156800
1-3_GL0050200	155040	161250	174850	233160	181510	205660	176500	187260	179640	202150			Q8BND5	120380	92717	88726	95253	68033	96726	93887	92262	102370	121060
13_GL0050784	87488	NA	146400	160320	15865	24878	126600	NA	NA	80903			Q8BNJ6	1428900	1239700	1237300	1284700	1218100	1291600	1528200	1572600	1106400	1530800
13_GL0054975	115760	124980	NA	114440	NA	117850	124470	126150	121180	117890			Q8BSY0	25780	126880	192580	228110	137090	NA	33275	208250	NA	180120
13_GL0058869	64365	47379	47282	23333	56591	54897	112040	107640	105700	158280			Q8BT60;Q1RLL3;Q9Z140;Q8BLR2;Q0VE82;Q9DC53;Q8JZW4	237630	224260	205740	236730	208440	210810	225280	171120	228770	234470
1-3_GL0073849;2-2_GL0076275;1-1_GL0087344	169180	NA	158220	NA	158070	151240	NA	NA	NA	159770			Q8BWT1	35905	67893	66378	69561	25876	68054	105930	94181	122030	33238
1-3_GL0081464;MH-6-3_GL0042215	36906	43523	40836	32079	33753	35296	36642	35615	30922	37245			Q8BXK9	45906	37219	NA	53849	NA	56349	60663	NA	65467	36189
13_GL0082481	6915.8	28650	30671	43023	29787	38958	45349	NA	36548	62235			Q8BZ64	1710900	1803600	1651900	1626100	1407600	1857200	1643300	1459000	1732300	1836900
13_GL0084008	152100	238140	205990	214230	226340	213730	244280	264010	262330	300910			Q8C052	218400	212070	170080	152360	137160	139760	142710	153470	156080	131240
1-3_GL0084454	127420	104380	129130	97271	124880	113670	140310	136830	129150	130350			Q8C196	50024	47005	40872	NA	NA	NA	NA	NA	NA	NA
1-3_GL0088005	58957	NA	NA	47568	NA	NA	52725	NA	NA	47630			Q8C1P2;Q8C1N8	6878100	6672100	6810000	6924800	6823200	6820900	6942600	6903200	6803900	6997000
13_GL0088770	947990	912880	949960	898920	825400	835780	922330	946740	956570	920010			Q8C3K6	425740	494830	440230	306470	384220	452060	435900	551130	485940	245870
1-3_GL0102532	113380	109830	85318	74029	135730	120110	52586	95471	55675	79207			Q8C6C9	2857000	2611800	2858500	2767900	2689700	2323100	2374200	2229800	2191700	2350500
1-3_GL0114313	55100	81392	80452	55189	85268	80641	55219	75523	86407	93360			Q8CAQ8	NA	35323	95932	NA	NA	65683	NA	NA	NA	201770
1-3_GL0117225	462150	432100	269400	199950	345680	327900	348540	579670	223770	312700			Q8CCH2	NA	54264	28850	69019	88712	86197	67988	72864	84591	66844
1-3_GL0118280;1-1_GL0112147;Group2-8A_GL0108082;26_GL0009909;1-3_GL0031341;23_GL0123068	318410	188170	202340	70551	148640	177750	98762	42822	158170	163590			Q8CGP2;Q8CGP1;Q6ZWY9;Q64525;Q64478;Q64475;P10854;P10853	1146200	656620	744550	920560	718830	614880	596820	746110	694250	826240
1-3_GL0119111	65180	68538	73990	73223	69454	80368	65590	57927	61842	61639			Q8CGU1	NA	NA	511210	NA	NA	NA	NA	NA	498920	437260
1-3_GL0120068	104290	26007	128920	NA	NA	69776	97681	NA	88794	NA			Q8CHG5	NA	NA	NA	NA	NA	NA	2968.7	NA	NA	8710.8
1-3_GL0120131	40579	49383	38972	39869	36164	46915	43725	43822	40496	45947			Q8CI94	34458	46204	48220	55040	50362	52421	44030	50224	61336	47570
1-4_GL0000992	83253	88199	95306	82190	86763	113880	119290	120590	123770	122050			Q8JZM8	NA	NA	33164	45236	29585	NA	NA	NA	52676	NA
1-4_GL0011369;5-6_GL0060701	488800	404890	417770	438080	455030	452500	486620	498310	480880	483130			Q8JZQ5	283390	268050	258870	307380	260310	277730	267110	262420	268000	265440
14_GL0016880	773490	823650	766510	710880	758900	799490	793280	861620	789910	782600			Q8K0C5	53952000	52842000	51117000	55301000	54733000	54130000	55924000	55398000	57760000	56221000
1-4_GL0020599;MH-6-1_GL0022310;MC-6-4_GL0086245;Group2-7A_GL0060830	104740	118880	94426	86904	93850	167100	134900	111350	8055	NA			Q8K0C9;MC-0-1_GL0005540	601090	665910	740760	675000	689360	761730	703610	708300	719880	711610
14_GL0022104;23_GL0018553	158010	136880	137950	133920	141840	130120	122850	134480	118030	155930			Q8K157	59855	64487	56836	69946	42979	66802	71063	106240	82160	NA
14_GL0024258	353240	299990	380610	445960	465650	439900	386070	385960	361030	397250			Q8K183	NA	NA	NA	NA	NA	NA	67738	NA	NA	41768
1-4_GL0026046	148130	154520	123290	127060	147010	132580	139430	139500	156060	142860			Q8K1H9	168310	199320	179970	178310	174110	179610	178130	171030	163280	176500
14_GL0026545	65307	59965	59181	53100	56622	60848	53086	54639	70620	61648			Q8K2B3	160690	202070	211230	189710	195650	184020	191060	215100	194120	204350
14_GL0028185	382320	397680	378620	426580	396740	302070	302530	294080	306350	307290			Q8K2I4	27850	NA	39137	49885	49033	42924	40488	53908	NA	37457
1-4_GL0031628	125770	128310	207410	176810	141750	152640	206250	180890	167220	130510			Q8K385	52578	NA	NA	50634	NA	52314	NA	67201	16491	NA
14_GL0031812	187040	126250	75800	NA	60324	56519	102070	34520	77085	103470			Q8K419;O54891	1636500	1590200	1637100	1689200	1643100	1692500	1747500	1652600	1605900	1714900
14_GL0032835	101270	83860	109540	80630	109630	131990	177330	128730	145860	179850			Q8QZT1	NA	NA	NA	46025	8410.9	NA	NA	4722.9	45679	NA
14_GL0045078	NA	NA	69150	NA	89620	NA	NA	NA	125980	NA			Q8R016	183650	147470	173980	197880	177670	153310	184040	157890	159340	163870
14_GL0045534	103210	118300	90008	115450	126820	82936	124100	115300	126450	119730			Q8R088	49635	45938	45992	49837	50500	42135	39555	34647	31189	33695
14_GL0046265	135160	NA	85175	NA	NA	5777.5	NA	NA	86098	NA			Q8R0F8	NA	NA	24418	30600	35088	NA	NA	21893	48706	NA
14_GL0056356	174990	175060	149570	154090	144860	132030	135410	129190	158990	157270			Q8R0I0	501310	504650	524070	536370	523690	535630	532010	552060	546740	561590
1-4_GL0058523	NA	190850	191330	205890	179390	167770	NA	NA	NA	167160			Q8R0Y6	NA	NA	57020	71461	22037	NA	NA	NA	87267	62331
1-4_GL0059879;S-Fe7_GL0070778	83543	78151	59443	72329	69425	72462	71381	77404	33987	49897			Q8R143	77890	77448	50224	59090	84096	96106	81334	75578	59998	67599
14_GL0060733;1-4_GL0028900;1-1_GL0003671;3-5_GL0061738;S-Fe7_GL0191360;23_GL0105051;MC-0-1_GL0028363;23_GL0149752;1-4_GL0024956;7-5_GL0055455;MC-6-4_GL0069182;5-6_GL0079744;8-6_GL0002466;6-3_GL0007035;16_GL0110771	292470	427890	380250	350300	357010	407020	423260	407810	408000	403630			Q8R146	172730	143160	174150	184570	159300	162120	126130	166770	153820	191830
14_GL0077266	89184	92631	76241	89078	82738	90663	88707	99321	77286	98182			Q8R1I1	NA	210630	NA	230350	NA	NA	243960	219480	199420	218860
1-4_GL0080002	365150	349860	357500	331480	339980	321770	322400	348790	351340	340350			Q8R1M8	5432200	4460000	5079400	5379300	4805400	4664600	4461900	4170600	4198600	3890200
14_GL0085272;MC-6-1_GL0029908;35_GL0149062;7_GL0102444;7-4_GL0131624;MH-6-3_GL0020275	135600	180810	176490	196880	210990	220320	200730	197370	210500	105550			Q8R2P1	104900	96392	99894	93647	88744	82944	79586	75307	76196	80477
14_GL0090060	NA	41642	47378	NA	44258	45913	6433.2	45738	51528	NA			Q8R3G9	2113600	2239300	1979500	2009200	1888600	1833300	1791000	1942900	1603000	1880300
14_GL0090199	496330	512580	534260	519700	517090	496540	501820	424950	482600	524460			Q8R3I2	449970	433540	480700	NA	NA	408260	399680	394400	NA	366830
1-4_GL0093240	200770	NA	155990	180120	148720	130190	147580	51885	156810	153470			Q8R429;Q64518;O55143	114540	128360	NA	NA	112870	108030	NA	NA	106620	105550
1-4_GL0094030	86302	117110	141930	110770	78956	152390	98032	132190	156100	216670			Q8VC28	126960	131290	99154	104300	100150	102110	107060	127010	NA	NA
1-4_GL0094208	58479	55892	NA	72453	NA	41075	NA	NA	NA	NA			Q8VCI0	123730	108880	110930	108310	123790	107040	106780	113520	129890	111850
1-4_GL0101572	185630	162040	169990	173830	145950	90281	126080	91911	86189	96598			Q8VCK7	28220	18878	NA	49443	44449	64005	NA	NA	NA	71948
14_GL0104367	148750	153070	158350	133720	131800	149580	131260	176790	151110	180380			Q8VCN5	268760	285390	231460	242330	244820	219930	223610	210770	207890	217630
14_GL0105035	98616	83843	119320	72897	70438	127880	96581	131620	98750	122250			Q8VDD5;O08638;Q61879	373830	388790	334280	370910	387840	368880	381810	383060	355180	390710
14_GL0106635	74402	68150	62661	57260	150240	97844	78523	67925	84658	86864			Q8VDN2;Q6PIE5;Q9WV27	524560	552430	459820	476180	445370	421650	447630	472490	415470	468230
14_GL0107848	148680	95440	144730	95089	104360	139790	123650	136290	105250	138230			Q8VEK0	37445	9725.7	10657	28702	25302	NA	33926	NA	NA	15596
14_GL0118271	236600	239340	242940	263240	237050	229180	232660	196480	233850	256120			Q8VEM8	484880	397840	639210	576770	625690	563210	500460	504010	592160	543680
14_GL0118341	120650	239350	111050	214830	197100	79926	81979	265290	104300	222460			Q8VEN2	27541	29070	29620	30326	28228	42808	38903	46887	38467	48244
14_GL0128099;S-Fe5_GL0110042	195670	168760	155660	201860	182650	148560	169630	162710	145810	149260			Q8VHF2	1821100	1730800	1930200	1858400	1877400	1823300	1826900	1718300	1796700	1801200
14_GL0134653	2254900	2674100	2267500	2256500	2312600	2275100	2472900	2374900	2469800	2471200			Q8VHV1	242900	NA	191440	202040	202220	192210	NA	236520	186620	229270
14_GL0136631	NA	33708	35283	37242	29364	33768	31556	31749	29488	28393			Q91V76	233230	236250	226840	230290	229100	214570	221140	213370	210110	230430
14_GL0138138	43746	NA	56292	38237	38688	56287	NA	24817	NA	NA			Q91V92	NA	NA	4076.5	NA	NA	10656	NA	NA	30010	NA
1-5_GL0010349	26437	18439	21665	18257	20088	26266	27806	38778	28724	39718			Q91VA1	356520	350360	329420	343030	317150	326510	312670	314100	302540	300840
1-5_GL0023339;MH-0-3_GL0065403;1-2_GL0048644	103990	109360	120870	112090	94325	85158	125620	124750	121170	128020			Q91VD9	19506	20212	23010	16660	23178	19850	17358	29875	24407	110340
1-5_GL0029067	117410	128520	130850	140180	152510	161740	148890	135030	135670	136600			Q91VR2	NA	NA	NA	NA	32840	79559	69859	71499	75737	NA
1-5_GL0036722	75219	77949	73082	45857	62589	53259	63564	53742	62512	48004			Q91W90	46466	64571	56480	47048	48550	53106	55769	65349	57932	61516
1-5_GL0038598;2_GL0115137	106570	172950	100790	101650	73732	105820	105150	96135	143510	87763			Q91WD5	331620	NA	376470	319010	449370	424910	49872	406800	428840	370190
1-5_GL0072941	321340	278810	258670	196040	310080	313010	277460	311620	307740	317770			Q91WG0;Q6AW46	1101200	1082500	1100200	1077700	1060700	1094700	1074900	1073800	1004400	1047900
1-5_GL0075367	184380	201000	198490	208850	240920	204570	216940	195890	195020	179830			Q91WK5	75545	69480	83604	83575	79070	80943	79986	80993	73349	85890
16_GL0001238	NA	67231	59970	NA	67600	78054	62916	84501	81362	NA			Q91WL0	98467	91176	98721	103980	110180	104230	97936	107070	91629	88009
16_GL0002435	40154	26958	52555	49000	49353	42531	52593	48287	51139	54201			Q91WP6;Q5I2A0	345970	335680	320920	320150	257790	218190	313480	295520	293090	347250
1-6_GL0004407	563850	642450	524310	461660	329980	436090	452840	490280	537860	528730			Q91WS0	66387	NA	73616	63556	72665	66827	NA	60452	58835	64362
1-6_GL0007650;S-Fe20_GL0186196;MC-0-1_GL0030789	249600	252260	263070	232020	NA	162750	216290	198360	NA	176960			Q91WU0	103820	105320	NA	75300	109530	92641	83056	76698	71204	65020
16_GL0008788	63282	61888	59582	59339	63607	58871	63004	67104	62133	59799			Q91WV7	440030	441870	426480	445640	432310	399400	398270	385950	398410	376640
16_GL0012697	110320	61154	107240	137850	257140	NA	19569	179580	117150	203830			Q91X17	139490	146950	158260	136250	139640	153400	158290	158790	164970	167930
1-6_GL0017811	394760	406880	428820	404030	413660	386280	364510	323610	313000	384640			Q91X79	5014000	4713300	5114000	5000600	5029700	4848400	4877100	4983300	4551000	4715900
16_GL0018481;S-Fe2_GL0005616;54_GL0044783;7-8_GL0156526;MC-6-3_GL0102226;S-Fe8_GL0294437;1-6_GL0074843;2A-dyr16-07_GL0043696	251900	446170	254770	301630	300050	288260	270500	316480	324450	315260			Q91XA2	82923	2719.5	NA	19397	NA	NA	NA	NA	6529.6	NA
16_GL0018652;1A-dyr2-07_GL0025186;4-1_GL0047735;G1-1A_GL0002834;MC-0-1_GL0090921;MC-6-1_GL0012762;S-Fe10_GL0130688;1-1_GL0119200;MC-0-1_GL0094073;S-Fe10_GL0130011;MC-0-1_GL0033950;MC-0-1_GL0030808;G1-1A_GL0100824;31_GL0054304;MC-0-3_GL0103823;S-Fe10_GL0116443;MH-6-2_GL0069964;31_GL0038263;S-Fe10_GL0056201;S-Fe6_GL0038579;Q8VHK1	434350	463680	396350	400740	386250	371360	390160	391710	376900	373160			Q91XA9	5723800	6188400	6434400	6558500	6464300	5946000	5957400	5716000	5710600	5826200
16_GL0018914	203750	178390	189840	149680	277900	193360	295690	167130	154660	155260			Q91XU3	NA	NA	14065	13798	17469	NA	13747	NA	21004	NA
1-6_GL0019151	241600	74335	216870	317220	253370	198450	195980	185020	222550	242420			Q91Y97	NA	72592	NA	67862	88086	68010	96991	NA	106660	74538
16_GL0034177	15580	11932	15279	15109	14920	14999	17008	NA	18272	25306			Q91YQ5	45389	40587	36491	39623	33873	44918	45412	41823	18332	40721
1-6_GL0034481	10843	37022	47291	37158	27363	NA	NA	22096	NA	NA			Q91YT0	110410	18804	111380	124960	110930	107130	88403	76458	100880	115790
1-6_GL0034482	NA	NA	NA	NA	134800	106240	NA	NA	NA	11912			Q91Z83;Q02566;A2AQP0	997220	898060	960990	954470	943590	976590	961540	1119400	940870	788640
1-6_GL0034486	81394	66488	193050	90265	96926	151860	83300	73669	66139	NA			Q91ZW3;Q6PGB8	269160	271280	246490	258580	227150	178560	186920	182060	169750	172150
16_GL0036423	70547	88512	104400	114500	111290	118950	113550	103580	104080	104810			Q921I1	378050	470530	427490	431700	473210	472140	450710	431530	415320	436230
1-6_GL0038420	50130	47056	44349	44676	43840	44996	44054	46777	43576	50434			Q924M7	16178	17008	15043	16074	17437	16163	16451	17680	19497	19333
16_GL0053753	45039	58478	46196	62377	42759	55649	55959	56347	54763	78760			Q93092	23536	22172	24004	18806	21079	11749	11205	9381.2	11827	NA
16_GL0055680	94853	140420	102160	89952	105940	131670	96887	125390	102480	121100			Q99J77	72485	116420	NA	97718	50263	41045	74797	50337	92075	105200
1-6_GL0056681	886530	848730	817540	841600	815090	813600	850460	873620	820890	846620			Q99JG3	194100	178560	185960	199140	180150	197010	199700	189990	167330	174570
1-6_GL0057821	62483	62327	52445	33186	39559	45090	46517	53088	48652	62269			Q99JW5	210090	196850	200200	236350	205040	238810	216820	219200	215910	225200
1-6_GL0071686	27607	71135	94465	94603	96761	102900	94419	122160	90440	97253			Q99JY0	67191	43208	56053	64011	63424	61538	52560	59784	56754	75782
16_GL0074983	154520	141450	125920	155880	118120	132910	133600	144170	140840	158660			Q99JY9	54232	49898	63283	74772	NA	86084	87572	NA	88958	NA
16_GL0077348	65007	75437	165240	59388	51330	37507	63385	65061	46022	68636			Q99JZ0	58867	61964	89411	29455	106300	106400	99231	124650	112280	76022
1-6_GL0079693	67766	110380	70646	82946	44787	76952	65118	70540	97603	49700			Q99K30	74935	65523	58387	97634	82445	69026	68951	65126	NA	NA
16_GL0083579	363310	465610	454800	385550	425270	366250	166460	269280	342330	324240			Q99KB8	333050	363240	386660	328040	356850	393320	287920	395380	146340	349850
16_GL0085211;S-Fe11_GL0089649	83160	127860	62820	99141	88332	17119	68757	NA	77621	69946			Q99KE1	NA	NA	39883	30249	32885	NA	33350	58357	NA	NA
1-6_GL0086957	112450	132970	115290	133670	105190	15239	107530	127350	120190	122950			Q99KF1	NA	4930.5	NA	61697	NA	NA	NA	NA	NA	NA
16_GL0092029	84376	86643	76016	66138	79321	NA	52839	NA	NA	70207			Q99KI0	223590	217700	231390	215330	204920	207980	221360	198240	205990	191050
16_GL0093860	255480	106810	603080	52511	75595	24908	40667	42577	25501	45576			Q99KK9;Q61035	92794	63434	69461	NA	75948	NA	93798	83055	NA	NA
1-6_GL0094859	359860	184260	155910	227180	305810	137420	293180	273990	206420	124240			Q99KP3	26364	29690	28236	23208	36274	45894	31851	30871	13223	54734
16_GL0101698	100880	97291	NA	NA	NA	78822	90436	76087	76598	NA			Q99KV1	120960	48673	121400	16751	95910	NA	133750	NA	NA	102340
16_GL0104024	112100	221850	167100	128040	47068	NA	131800	60182	174690	34310			Q99LC5	190390	251180	236770	221120	184080	209370	215650	222840	238200	227200
16_GL0104380	191240	186360	150790	73931	126380	196020	191300	145890	152790	129500			Q99LJ1	62253	75273	37517	53480	59042	52199	53360	53330	59385	63802
1-6_GL0107645	41411	37699	38370	38496	37611	32834	36825	45546	31771	38532			Q99MN9	NA	NA	NA	38810	5696.3	NA	NA	NA	NA	NA
16_GL0108906	47806	29538	46551	49098	48514	48023	51570	49023	50144	51469			Q99MZ6;P97479	88633	90751	99052	87213	89570	83564	85138	78378	76583	91601
16_GL0111863	182130	169800	161480	144900	162550	152270	163240	168250	175750	179860			Q99P86	89529	11545	94852	282390	97476	12737	387090	87115	325550	127230
17_GL0005632	328600	348910	291930	288730	319870	315660	317230	317620	335770	352280			Q99PD7	785170	777220	762050	709810	675230	618010	670720	644520	679510	683850
17_GL0007853	NA	NA	NA	NA	22208	22951	NA	NA	153100	74677			Q99PT1	1206900	858490	672950	837220	785900	752720	655110	707640	653890	644320
17_GL0012715	80545	100020	91984	120360	120380	107700	132060	126970	88757	127340			Q9CPQ1	172220	142630	150050	176600	175320	163530	186520	170790	153860	150980
17_GL0017174;17_GL0002929;20_GL0064585	220150	205270	253340	237710	227200	149510	217080	197260	213900	233180			Q9CPQ8	262530	258040	265800	263040	265130	246810	264960	254910	262190	270930
17_GL0017708;34_GL0016941	34070	41194	38222	NA	26498	NA	NA	37732	15204	58386			Q9CPU0	NA	196570	9156.9	76734	227610	36329	77584	77106	167740	76755
17_GL0025669	130310	105350	NA	120720	114040	97741	105770	103530	89282	94308			Q9CPU4	194580	166690	103700	213500	162890	282250	223320	243460	232300	253720
17_GL0031453;35_GL0119623	96108	88861	96614	107080	90964	95312	90117	87257	91027	71667			Q9CPY7	1084700	1144500	1110200	1123400	1038300	1119100	1074400	1082200	1165600	1065400
1-7_GL0032360	68510	68871	56743	67814	64966	69329	66562	54912	55356	54827			Q9CQ52	43503000	45218000	47056000	50146000	51050000	49329000	49977000	48692000	51619000	50174000
17_GL0034252	106540	96398	100260	93364	115380	70904	86541	82189	91131	89980			Q9CQ62	52741	39821	65422	58097	24628	37328	64296	26694	26945	39588
17_GL0038620	72164	NA	NA	NA	95946	72647	87086	21239	130090	90885			Q9CQA3	210950	129900	148040	101490	165500	150680	218270	165180	206500	243670
17_GL0041592	540310	630770	498610	NA	NA	466790	440600	408590	447490	417530			Q9CQC2	3803200	3438800	2917900	3283000	3171100	3388900	3679800	3052800	3205500	2680700
1-7_GL0042718	161220	124070	153180	154450	135220	148420	49407	132330	164370	148550			Q9CQQ7	180870	187740	175350	134080	158600	132940	145860	145220	130280	147790
17_GL0044386;20_GL0082386;8-2_GL0127477	248460	224590	265220	233120	263370	300940	280080	318570	305440	288880			Q9CQR2	51668	NA	24224	18881	27086	NA	14973	14490	NA	15690
17_GL0044561;S-Fe7_GL0260487;S-Fe3_GL0018540;52_GL0098467;1-1_GL0023442;MH-6-3_GL0108133;41_GL0082993;S-Fe8_GL0209974;8-2_GL0008326	47839	54101	51603	51558	46711	40148	38331	39883	43547	40190			Q9CQV3	148300	219140	178890	134730	116100	155220	140420	159850	147280	130120
1-7_GL0050721;2-1_GL0035926;2-3_GL0035795;S-Fe12_GL0128799;G1-1A_GL0025113	1823000	2034300	1809200	1772500	1678800	1754900	1729900	1736600	1759900	1693200			Q9CQV8	233020	NA	35386	71713	NA	123750	95995	66619	NA	80861
17_GL0054728;Group2-3A_GL0074883	70685	56980	45443	43490	56490	76903	43595	5015.1	46005	50333			Q9CQW5	93288	62773	130410	118990	109580	NA	98740	110030	105590	NA
17_GL0057695;S-Fe6_GL0073324;38_GL0136918	101590	77635	114200	90812	160470	91365	44869	73612	90548	65227			Q9CQX2	NA	9451	33838	26927	36796	33446	29143	22794	40957	23227
17_GL0063191	154630	114440	144800	124700	148860	134830	145130	138790	117830	110710			Q9CQZ6	36241	47731	49813	56373	54527	50945	NA	51476	46068	46018
1-7_GL0071625	100420	102370	81477	82524	89240	89393	87816	83535	160020	87933			Q9CR02	NA	NA	NA	NA	NA	324280	276050	282930	306190	270340
1-7_GL0075894;S-Fe7_GL0051574;MH-0-5_GL0121836;S-Fe1_GL0048528	151720	108480	119050	78433	117790	132160	127800	142590	115990	142420			Q9CR35	23006000	21138000	21247000	20398000	20278000	19934000	18787000	17079000	18527000	19081000
17_GL0077597;8-2_GL0096686;2-1_GL0060674	112620	106700	111520	76009	NA	92002	NA	NA	81295	102160			Q9CR57	93578	NA	NA	NA	56156	NA	NA	NA	NA	NA
17_GL0081252;2_GL0001740;Group2-6A_GL0037095;20_GL0005185;17_GL0139147;20_GL0129438;1A-dyr2-07_GL0001224;S-Fe3_GL0056909;Group2-3A_GL0030493	37335	33286	33931	NA	31563	25758	28257	29005	43416	26088			Q9CR62	17051	18475	20480	28068	20416	38200	23870	31276	29480	18798
17_GL0082678;G1-7A_GL0075935;8_GL0085543;20_GL0085072;17_GL0109217	NA	NA	76889	NA	NA	NA	NA	NA	NA	142610			Q9CR68	416240	387820	495630	529540	434500	428470	353400	365930	310130	367270
17_GL0083320;1-3_GL0064412	201430	220490	282340	200920	293940	125020	193430	NA	47680	189780			Q9CRY7	193960	165120	153670	131240	251920	164490	178980	56391	NA	167700
17_GL0086790	245200	138960	142350	186290	143420	141190	160780	147620	167950	138360			Q9CVB6	82961	NA	52677	43756	40157	32093	42729	43690	42442	46472
1-7_GL0088538	81384	142500	101870	78025	70243	49580	73542	161540	78881	NA			Q9CXF0	376970	NA	NA	NA	NA	NA	NA	369740	NA	NA
17_GL0098350	360340	94945	369780	340400	329990	49181	347660	334710	71224	68459			Q9CY58	97185	NA	NA	28846	NA	NA	NA	NA	26536	NA
17_GL0099111	257820	230660	271240	218630	102230	284170	294750	221470	231200	439620			Q9CYA0	45686	45109	38803	39811	39956	42350	40042	39949	42429	38931
17_GL0099112	113970	80947	40405	95232	101780	64335	69139	NA	28241	51405			Q9CZ13	269230	136630	218780	244040	167120	196880	239410	190290	189410	116750
17_GL0100210	70951	51022	NA	NA	42248	NA	76632	73905	NA	NA			Q9CZM2	NA	154610	102370	123080	115570	148980	102320	NA	106840	72638
17_GL0101695	NA	175610	113220	99328	112370	145560	109570	NA	126900	NA			Q9CZS1	75866	79196	98088	114100	122380	126760	123490	117670	150570	127620
17_GL0105836	1070000	1060300	1005600	1075200	998900	1024200	1007200	988150	1060400	987380			Q9CZU6	512080	480800	415070	505080	265900	318640	433930	365910	374780	366600
1-7_GL0113738	137210	150590	162840	130250	172120	157680	123210	70429	131870	132300			Q9D051	99105	45300	NA	97950	79748	33478	NA	105400	137850	NA
17_GL0115680	128650	98343	146740	156680	131120	NA	138670	128310	146470	83718			Q9D0L8	737970	928510	1015500	1330400	1241800	1166500	1184400	1122200	1373400	1030500
17_GL0116041	2192400	2273500	2170600	1909800	1903800	1984500	2744300	2547500	2518900	2188400			Q9D0M3	66316	38132	39571	55989	56893	58745	55507	58121	64087	69363
17_GL0117386	NA	468710	446800	497640	662790	NA	608100	518930	NA	NA			Q9D0R4	478740	510580	483410	454140	418270	483980	492180	459500	453550	435540
1-7_GL0120419;1-3_GL0017870	357630	322220	323830	382690	363160	349420	353280	372040	359810	379080			Q9D154;Q8VHP7;Q5SV42	1117400	1126500	1290700	1230000	1299500	1242400	1214300	1178500	1149200	1151800
1-7_GL0120747	268640	262840	278430	175950	315670	123480	173380	300200	262620	364550			Q9D1A2	229800	254650	228650	260710	273620	270150	276040	284390	277750	271810
17_GL0125692	133330	141800	131400	123910	119830	114850	128140	118930	113100	137700			Q9D1D4	12482	155410	15564	61253	59027	NA	64707	68280	NA	55698
1-7_GL0127377	282940	224690	213740	122920	204610	258580	239800	267290	271470	161360			Q9D2G2	156680	149980	158550	130340	173010	175740	153490	169530	142040	47914
17_GL0127899	122830	NA	NA	NA	129810	126070	NA	NA	110420	NA			Q9D2U9;Q8CGP0;Q64524	211330	165650	118010	107060	98546	101820	NA	101330	83229	114330
1-7_GL0129603	157200	132800	38106	156330	165120	NA	15584	NA	NA	153720			Q9D2Z1	84162	23905	106000	107300	107380	100780	129300	101300	98562	148560
17_GL0132051;20_GL0145886;17_GL0088819;G1-7A_GL0018427;20_GL0085515;17_GL0160254	104460	89652	98611	87200	73556	117420	74324	66086	83577	89641			Q9D311;Q8VE49	NA	84283	185180	7589.7	115140	171390	105920	88592	NA	102540
17_GL0135287;29_GL0049199;2-4_GL0006265;2-2_GL0129598;S-Fe12_GL0050488;1-1_GL0029137;MC-6-2_GL0110651;MC-6-2_GL0140356	39255	NA	125360	178080	164020	133650	168500	93426	NA	170630			Q9D3H2	1605400	1607100	1486700	1671200	1644500	1553700	1657100	1551200	1508800	1668100
17_GL0138871	50601	68003	53680	65788	NA	NA	NA	92859	NA	108410			Q9D687	158410	85669	124290	115180	128610	131910	129530	139100	146700	100450
17_GL0140266	329690	331070	393240	349680	371030	343350	312700	350960	359580	348040			Q9D6R2	101430	63172	74521	60083	59409	55991	62423	63804	76176	NA
17_GL0140636;14_GL0001317	94693	94738	79499	91466	99425	70643	77784	72772	72204	74938			Q9D733	4326800	4078500	4190400	3972300	3830300	3780000	3752200	3704400	3785500	3804400
1-7_GL0142767;40_GL0071771;1-1_GL0070442	137850	NA	NA	183550	NA	NA	NA	NA	113380	NA			Q9D799	105260	105320	125990	129040	130310	119380	122710	108330	104430	111880
1-7_GL0146731	420260	355850	363920	381660	369080	247760	302270	316210	260450	311990			Q9D7B6	NA	NA	NA	NA	NA	NA	NA	13927	208710	NA
17_GL0151479	100080	106000	111350	100460	97442	100280	98435	100320	95986	103130			Q9D7L8	246130	1207.2	329770	163860	224920	NA	NA	247210	117900	253210
17_GL0153311;2-1_GL0018300;Group2-7A_GL0070020	666350	616550	748010	843580	589410	350960	794000	611790	644610	622670			Q9D7P9	115820	102810	127230	126590	118250	135940	121210	111080	105680	111480
17_GL0153450	147980	144790	148280	NA	133760	117440	107670	136310	101870	154660			Q9D7Z6	4003600	3723300	3475700	3348700	3387300	3338300	3255500	3156900	3218500	3133500
17_GL0156126	62415	68126	55524	61930	62854	64383	60474	58506	60878	76077			Q9D816	410690	423850	400730	396670	381700	396040	362750	364780	335440	378440
17_GL0156635	461860	442950	415680	397710	391650	420930	401620	395760	400040	395440			Q9D819	NA	60066	43974	NA	29380	NA	74657	81827	96974	115660
17_GL0158445;2A-dyr13-07_GL0016166	NA	124960	83712	138750	124470	127770	135530	128180	89825	145810			Q9D855	79237	118570	131200	121520	92538	191850	152180	68134	114520	147470
17_GL0160550	421630	350000	265910	NA	349490	282480	322680	443890	NA	NA			Q9D8E6	99815	66717	23777	19213	NA	20221	NA	23332	20855	NA
1-8_GL0002819	507650	500880	530510	515060	500130	510810	437980	505200	476180	450040			Q9D8G5	NA	NA	NA	NA	37419	NA	44508	63713	NA	56419
1-8_GL0016906	142940	155010	142530	153550	168400	3112	162990	186880	200270	160170			Q9D8N0	98641	108410	112850	71287	89664	108520	92474	124380	77552	96247
1-8_GL0040021	103380	101450	95110	92523	101300	83944	79399	82634	98890	87331			Q9D952	NA	5336100	4989700	3897600	1182700	7161500	4154000	3730600	3964100	4087200
1-8_GL0064640;28_GL0027363;MC-0-1_GL0036391;10_GL0027835;G1-1A_GL0032124;1A-dyr2-07_GL0057578	160070	220550	165010	165160	202580	182940	119710	162900	178630	168610			Q9DA19	2088900	2146100	2088900	1660900	1618600	1591600	1459500	1599900	1545300	1760600
1-8_GL0071629;1-7_GL0015164;8_GL0016986;MH-6-4_GL0119103	117570	110320	73879	86888	86141	88043	96603	117890	111600	108590			Q9DAX9	NA	NA	NA	NA	NA	NA	318230	NA	105180	78299
1-8_GL0078987	392690	404160	428610	465120	457010	469370	460070	430220	387190	398490			Q9DB20	154580	253600	181200	130290	128770	150390	139920	143160	134530	140830
1-8_GL0083404;G1-1A_GL0107449	1198300	761270	215320	1061500	1079400	951680	1036300	1081300	826920	758970			Q9DB77	334590	342320	320660	305070	343310	315290	294990	310660	286960	324300
1-8_GL0091748	98843	94784	96101	96198	104020	90219	91842	103400	109580	86214			Q9DBG6	52237	NA	52468	65072	65609	73580	92189	60549	71428	NA
1-8_GL0096783;8-1_GL0122418;7-4_GL0016879	312480	303260	284910	294320	283010	270340	228770	269010	237510	263540			Q9DBJ1	162450	93366	120700	NA	115150	122260	121550	60154	105160	NA
19_GL0012001;1-8_GL0081270;MC-6-1_GL0038567;38_GL0098251	95503	66905	98196	84507	91047	69821	81222	75989	77599	70093			Q9DBJ3	NA	NA	NA	NA	10091	10956	NA	14330	NA	NA
19_GL0026803;25_GL0027332	185650	179830	136390	186520	159360	135950	151020	188960	194290	171520			Q9DBP5	113060	101070	99914	72780	75155	77640	73266	76417	69321	79225
19_GL0028928;1-1_GL0071681	41991	NA	44573	44019	38506	42499	35116	40375	40333	53920			Q9DBX3	265570	287290	260940	262600	267620	253190	248370	257000	264940	278470
19_GL0043319	153600	NA	138860	217430	391100	27446	218110	NA	214460	217050			Q9DC50	51554	67118	54433	60108	51531	51055	59514	46270	43367	44419
19_GL0049070	199690	306970	181540	234780	236640	380780	401410	321770	231180	113980			Q9DCD0	104150	105460	94183	71570	41039	76258	78879	86870	66468	58290
19_GL0062420	62980	44735	92827	10823	48036	62318	37422	NA	39682	59039			Q9DCJ5	20559	25991	33200	34072	32960	33494	33038	41115	36845	39524
19_GL0080876	102740	124650	111640	109750	110590	82454	97278	91164	55138	91505			Q9DCM0	216960	232100	212190	229930	218130	234050	220330	213780	208350	207780
19_GL0086251	135500	153320	114420	121400	161090	109850	99331	49446	73512	83649			Q9DCT2	NA	NA	NA	NA	105680	NA	NA	NA	101170	NA
1A-dyr1-07_GL0006858	13935	36869	22800	37291	42877	48906	46209	46326	42633	41663			Q9DCW4	NA	NA	NA	26502	23479	NA	25840	33467	NA	43393
1A-dyr1-07_GL0015343	8342.2	NA	NA	NA	54027	53005	34678	45551	44964	NA			Q9DCX2	37917	122670	206000	159690	64183	179440	151000	38556	161800	166770
1A-dyr1-07_GL0015351;7-5_GL0112814;Group2-5A_GL0033504	436410	522050	438850	403470	371870	475260	432940	507930	480520	465880			Q9DD20	161460	64447	61948	61374	NA	58241	52759	51144	36398	NA
1A-dyr1-07_GL0022001;6-6_GL0094383;1-2_GL0082674;11_GL0136326	669990	609570	601360	413550	636020	542100	583030	626400	544140	534790			Q9EQ06	61275	70158	NA	NA	32001	26545	31038	36084	29283	40216
1A-dyr1-07_GL0022012;1-1_GL0008776	98352	101350	93043	100440	105030	104420	108710	108000	105290	NA			Q9EQK5	75027	91602	19491	98580	108390	110820	96138	NA	107910	98328
1A-dyr1-07_GL0027622;5-8_GL0155540	504710	446980	453540	401340	446170	488870	463050	380730	422720	341730			Q9EQU5	92253	81207	75649	68862	66360	58392	60269	56451	65650	90858
1A-dyr1-07_GL0028607	293990	286410	398420	350820	357680	354380	354070	314090	359350	337150			Q9ES64	577950	145110	567210	944740	1046500	1906700	328570	679160	2393400	754730
1A-dyr1-07_GL0041020	NA	157630	14115	20621	71971	102130	NA	163600	101640	101440			Q9ES88	NA	NA	17236	14404	13919	24238	NA	NA	24389	20267
1A-dyr2-07_GL0001117	76497	52035	62038	102890	100710	65047	100450	109100	108940	137590			Q9ET22	16502	20028	20816	15876	13725	22291	20759	24404	20700	NA
1A-dyr2-07_GL0002158	90178	NA	NA	NA	NA	NA	83540	125330	NA	NA			Q9JHE3	1509400	1586000	1458900	1510000	1529200	1447900	1503300	1477300	1493000	1479200
1A-dyr2-07_GL0005927	68783	86889	77952	78602	76815	78674	71133	83713	78844	66966			Q9JI48	8529900	8824000	7001200	7107700	7166900	7002500	6723100	6440000	6473200	6313500
1A-dyr2-07_GL0007771	72791	90212	75185	NA	80472	77959	96005	99708	91865	91892			Q9JI67	NA	NA	NA	NA	NA	48224	31341	35083	NA	8422.5
1A-dyr2-07_GL0012775	122420	NA	115010	127190	136920	NA	165970	144000	128950	163840			Q9JII6	NA	NA	NA	NA	NA	120990	122490	NA	NA	NA
1A-dyr2-07_GL0013677	280890	299100	277360	234640	285920	314550	314760	302700	258130	288090			Q9JIP7	203640	229750	187400	151680	204950	259230	329740	47995	172700	310490
1A-dyr2-07_GL0013684	53333	115240	NA	23026	52501	52872	70231	48688	47896	53978			Q9JIQ8	379820	17605	316360	396550	406720	599820	613810	316280	316420	218870
1A-dyr2-07_GL0015347	88259	90482	76453	63706	77985	93243	72683	92639	45021	64784			Q9JJ00	206470	201910	183940	172410	184040	187370	243170	182510	202580	159850
1A-dyr2-07_GL0017940	674070	687830	700890	684930	655450	831950	768400	710900	741810	721670			Q9JJI8	1978.1	7806.5	13354	21126	24253	33968	31256	26596	17284	29085
1A-dyr2-07_GL0018394	72391	80544	132800	102640	112520	150640	134830	161820	NA	NA			Q9JK88	401090	336440	342360	463200	367070	402700	350110	358870	293830	403200
1A-dyr2-07_GL0022384	NA	NA	NA	NA	NA	NA	264600	NA	NA	209730			Q9JKA5	629030	678110	662010	674980	660390	663910	639000	652230	614970	656960
1A-dyr2-07_GL0024075	46694	44288	29801	40486	26638	49790	68914	56595	70192	70577			Q9JKF1	29269	22411	20995	19137	18690	18131	17577	14255	19940	NA
1A-dyr2-07_GL0025235	NA	45171	NA	NA	NA	NA	64306	NA	11404	NA			Q9JLB4	612040	573630	546540	509560	501430	507050	562810	543870	504300	518900
1A-dyr2-07_GL0025321	NA	60698	NA	49377	76864	69748	60042	74772	63807	NA			Q9JLC4	394020	400920	417480	383760	381000	386880	355060	375220	296470	341850
1A-dyr2-07_GL0026662;G1-1A_GL0026386	705890	765180	660670	673870	641120	712870	628350	650620	720560	640830			Q9JLR9	NA	40354	33110	30959	26839	30035	26011	35267	30592	34905
1A-dyr2-07_GL0027476;17_GL0041626;26_GL0078522	663500	664090	563220	558370	417660	446530	503700	490060	543550	463770			Q9JLT2	638700	613410	603750	609690	589340	612000	618760	619290	628070	629090
1A-dyr2-07_GL0027893	79597	214690	NA	131980	NA	145370	NA	NA	8975.6	110510			Q9JM84	51275	40199	48703	44967	57179	49466	47335	37596	38642	52978
1A-dyr2-07_GL0028334;4-1_GL0065985;1-8_GL0053882;G1-1A_GL0070527;MC-0-1_GL0060605;13_GL0085660;MC-6-3_GL0028775;G1-1A_GL0096655;1A-dyr2-07_GL0065865;7-1_GL0076793;20_GL0014287;S-Fe10_GL0073477;MC-6-4_GL0006970;Group2-8A_GL0096241	217140	271980	247880	245560	214100	229720	277090	297040	241380	184090			Q9JMA9	102040	113330	110270	106350	95761	102580	103790	91576	85044	93636
1A-dyr2-07_GL0032467	799630	782450	678090	676720	618590	541170	607310	581060	593450	543280			Q9JMH6	78970	86228	78034	48791	81752	75910	75016	89604	76750	79568
1A-dyr2-07_GL0033201	289930	320970	336440	419910	238660	390770	374170	380490	369420	390580			Q9NYQ2	159670	124710	139780	119530	103560	106360	123380	183690	168500	102080
1A-dyr2-07_GL0033906	73079	78317	NA	73387	62988	78277	68119	82859	NA	69928			Q9QUI0	59336	44739	44881	49083	48408	45345	46669	48152	41948	43049
1A-dyr2-07_GL0037152	40101	76120	66949	77338	62558	61219	64662	58138	96479	30000			Q9QUM9	188760	205010	199240	245110	190660	199390	214790	186180	174600	179970
1A-dyr2-07_GL0038040	247980	278890	374270	180280	254970	400230	295410	294700	224210	301700			Q9QUR6	217030	340550	154670	220460	237240	111320	179070	249050	NA	193390
1A-dyr2-07_GL0041271	36133	40712	40909	35072	40056	40117	42031	37945	29029	40963			Q9QWG7	113620	144840	NA	130800	NA	112590	117330	110130	NA	141780
1A-dyr2-07_GL0041521	6283.1	NA	45948	53061	NA	37042	34078	57864	47646	38864			Q9QWR8	112640	97689	91480	96834	107330	90855	78433	90448	95992	99979
1A-dyr2-07_GL0044881	36312	36089	31638	41036	39746	43530	38797	43460	42517	41759			Q9QX15	105900	100850	88011	77760	95325	90772	88138	94501	92169	90548
1A-dyr2-07_GL0046703	224310	236240	228590	214130	208670	287380	217540	209130	188800	221140			Q9QXS1	4032500	2275000	5044100	3860000	4574500	3781400	2276000	3578900	3591400	4904500
1A-dyr2-07_GL0047813	49452	NA	NA	NA	NA	85863	NA	NA	NA	33625			Q9QYB5	NA	NA	NA	195580	100260	NA	100620	NA	NA	NA
1A-dyr2-07_GL0049124	95356	190040	98635	66539	69930	144810	75160	136310	154460	189310			Q9QYI7	913310	1001400	1052700	1085700	1498800	768220	1588500	1319800	1266800	1442500
1A-dyr2-07_GL0049252	NA	43373	39357	NA	36021	NA	NA	2211.4	NA	20810			Q9QYZ9	135410	122090	142300	127010	168660	135680	139470	121290	14631	141480
1A-dyr2-07_GL0049302	65042	72064	63350	NA	NA	38665	50596	71094	46423	43106			Q9QZN4	100530	111190	92158	93602	86302	96890	43483	84061	74297	79499
1A-dyr2-07_GL0049869	96316	93912	44961	76599	85431	87914	64572	90909	75042	74368			Q9QZQ0	253500	254980	284190	259250	224420	303610	291900	303840	289070	195500
1A-dyr2-07_GL0051691	125720	117590	90175	94178	96319	110830	NA	37525	88078	89834			Q9R098	16006	19944	22722	14425	12988	23071	17190	22746	21478	21907
1A-dyr2-07_GL0054586	86041	180290	31158	53206	75181	64611	81284	82459	81605	63446			Q9R0H0	4667	26321	40021	47191	50945	85428	113350	53940	118120	96946
1A-dyr2-07_GL0057236;Group2-5A_GL0014900;S-Fe2_GL0214744	200280	240240	184290	206360	209260	212030	224900	158610	177910	257950			Q9R0P5	155790	158270	156080	159530	140140	157100	213820	147300	151340	121960
1A-dyr2-07_GL0057868	47185	76669	49199	60931	49541	44041	63243	59599	47568	NA			Q9R100	3400900	3786000	3474300	3363200	3389000	3435000	3358700	3510400	3422300	3384800
1A-dyr2-07_GL0058687;S-Fe10_GL0010502;1A-dyr3-06_GL0029045	96959	48091	32597	13660	57422	69127	74425	76954	76732	46602			Q9R112	424270	457140	524320	513030	508070	500800	492350	481530	577460	501330
1A-dyr2-07_GL0064195;Group2-8A_GL0004158;1-8_GL0009479	68129	265090	NA	NA	230160	223230	218890	NA	NA	244290			Q9R1P0	216280	223900	NA	NA	190660	226630	NA	NA	205930	197160
1A-dyr2-07_GL0064584	12376	137020	81576	143160	129540	211020	266210	102060	149930	268330			Q9R1P1	242350	48564	11271	267460	238450	181780	206150	218490	200840	225790
1A-dyr2-07_GL0066529	89856	100700	136090	122190	119800	107510	123900	114600	99056	117950			Q9R1P4	64796	41811	52037	44451	58249	48704	29653	63177	64954	49313
1A-dyr2-07_GL0068012	35629	30374	39515	26773	30941	28675	1506.7	30798	36961	38278			Q9R1Q7	NA	11148	48263	NA	14809	NA	NA	NA	NA	11660
1A-dyr2-07_GL0068242	NA	104320	68418	77568	153620	119350	128270	120520	132220	136690			Q9R1Z7	75331	63667	55998	58865	109230	34734	22831	39684	28385	23616
1A-dyr2-07_GL0072819	36733	38701	30118	32193	34387	42666	45120	42666	43802	48276			Q9WTM3	NA	90181	202620	2628.7	131930	134060	NA	296730	NA	NA
1A-dyr2-07_GL0073121;2B-dyr24-06_GL0041129	46734	57997	55441	60578	70039	53925	55377	72755	45166	54362			Q9WU03	32364	29720	38086	26781	36945	39037	38089	37663	29587	36392
1A-dyr2-07_GL0073393	112450	117910	111550	109110	86219	91881	101370	101600	97162	99358			Q9WU78	75022	NA	NA	79852	57230	51001	67381	78425	77011	NA
1A-dyr2-07_GL0073957	131040	NA	116200	116190	130990	174830	129470	137730	161750	175660			Q9WUM5	39624	22753	50698	42241	35030	61535	72563	50774	71579	32940
1A-dyr2-07_GL0074297	93762	114020	85159	102720	107420	85792	80068	104840	98731	124080			Q9WV32	26705	31130	33121	21433	19055	39550	32278	44371	48732	44878
1A-dyr2-07_GL0076977	105490	NA	73296	87365	68600	113890	108150	96496	86848	NA			Q9WVA4	94070	36517	38662	NA	35536	35510	35104	31982	33995	35625
1A-dyr2-07_GL0079837	61326	56280	58083	39967	42614	42785	29704	40900	63766	56445			Q9WVC8	133440	167690	123740	126210	107240	94181	110810	103020	85186	99181
1A-dyr2-07_GL0080061	130870	118380	116620	92019	94183	54945	136660	113630	116770	135910			Q9WVJ3	154790	178160	161960	100100	132950	149410	147420	NA	141540	170580
1A-dyr2-07_GL0080700;4-5_GL0094535;G1-5A_GL0113281	305330	172940	236260	256470	237110	114540	258780	288570	255310	237570			Q9Z0F4	NA	100020	25499	10912	24899	26467	NA	16340	30693	8716.9
1A-dyr2-07_GL0081225	145910	189130	151530	183580	134910	194060	194720	195180	174190	202730			Q9Z0G9	85483	NA	213090	448930	274700	162490	NA	NA	71620	NA
1A-dyr2-07_GL0081226;6-4_GL0032353	391740	370960	330800	346580	345420	298950	323450	366750	303740	305860			Q9Z0J0	539120	525580	509580	542900	522600	465150	451790	465820	443360	454430
1A-dyr3-06_GL0023343;S-Fe5_GL0087131;1A-dyr3-07_GL0042950	902700	546130	564450	583880	427640	556110	561210	609780	575730	571030			Q9Z0K8	540300	875300	795470	871220	602390	449910	46447	422690	451310	651890
1A-dyr3-07_GL0026644	637180	716030	720370	611270	647570	684990	643540	675540	795650	936020			Q9Z0L8	1110000	1226700	1310700	1209900	1269900	1179600	1339800	1281500	1239900	1279200
1A-dyr4-07_GL0000364	223140	240550	272500	279350	318620	294830	283130	298950	235610	274380			Q9Z0M1	273570	217860	189720	191500	185090	186290	197990	196450	203130	211340
1A-dyr4-07_GL0002538	15925	19002	19364	15462	21527	22077	25323	25364	28673	21211			Q9Z0S1	33262	43364	40325	42405	48138	48262	44465	57464	52678	59739
1A-dyr4-07_GL0002546	417500	426260	443120	440020	427260	466080	515590	484150	481580	482580			Q9Z0Y2	4503800	4013800	4742900	4504800	4535300	4802800	4483600	4531500	4455500	4340600
1A-dyr4-07_GL0003295;8-1_GL0120912;Group2-3A_GL0034976;Group2-3A_GL0043324;G1-5A_GL0103962;G1-6A_GL0032118;5-8_GL0037685	87186	65509	119080	123460	139150	125810	130510	123550	141120	152420			Q9Z1P5	NA	787790	810430	606010	631710	550120	583710	570030	476120	518370
1A-dyr4-07_GL0005233;MH-6-1_GL0089961	65240	64063	72951	77030	69082	68584	67336	69230	66283	57723			Q9Z1Q5	119400	94618	74451	NA	6225	120550	124360	65827	134210	82014
1A-dyr4-07_GL0006102	122380	117050	119150	143700	126090	131870	145990	138740	144630	150990			Q9Z1W8	209090	284440	268210	233720	194810	254450	310650	267920	280410	285920
1A-dyr4-07_GL0007893	112830	120240	109260	113590	105470	111980	113650	114820	124160	108490			Q9Z1Z2	NA	NA	30532	31508	50906	28556	29142	24289	38110	NA
1A-dyr4-07_GL0009375	11793	NA	5702.4	NA	2202	16539	41661	54162	38257	36898			Q9Z261	502060	626770	568260	568090	526810	514130	466020	418690	470440	377160
1A-dyr4-07_GL0009722	267230	325610	311600	326140	342870	153930	321090	324060	297910	278560			Q9Z2H7	140120	117740	67510	17594	60891	63911	95881	90480	101040	101400
1A-dyr4-07_GL0011510	57165	110930	75729	107640	121150	109910	97831	126320	82261	63250			Q9Z2I8	53069	57004	47357	52579	42282	42487	52277	55338	72164	51277
1A-dyr4-07_GL0011766	255640	97137	35820	160940	120790	56768	58989	132550	32564	125100			Q9Z2U0;Q9CWH6	197930	201950	156700	173050	161270	162070	169320	170840	165930	166310
1A-dyr4-07_GL0011948	NA	NA	8939.9	7929.6	8511	8566.4	14837	18581	17013	23625			Q9Z2U1	100720	102180	86644	88070	73035	75743	110820	104750	92845	124030
1A-dyr4-07_GL0016031	99691	124080	145200	90435	120960	120700	123260	136340	126980	125570			Q9Z2W0	851460	875070	854790	819640	845220	793630	796860	845880	775480	788810
1A-dyr4-07_GL0017631	54302	39367	44913	36795	48181	60122	10250	63006	36487	54510			A2AEP0	1180500	989090	1487600	1364500	1262500	1361200	1093800	1348700	1274400	1335600
1A-dyr4-07_GL0018595	NA	64922	86119	1131500	9996.8	1305000	67660	1836200	83804	1301900			A2AJX4	288450	181460	113100	67116	132640	124430	116480	130480	152200	92101
1A-dyr4-07_GL0019666	NA	30110	NA	NA	NA	NA	NA	956280	NA	849610			A2ARP9	2850300	2399900	1991100	2474900	1881400	1717100	1566100	1746800	1768500	1617200
1A-dyr4-07_GL0021362;Group2-5A_GL0149413;Group2-2A_GL0025382;8-1_GL0094982;8_GL0153459;6-4_GL0019431;6-3_GL0027473;3B-dyr36-06_GL0038076;1A-dyr2-07_GL0006914;1A-dyr1-07_GL0047212;G1-7A_GL0066840;Group2-3A_GL0110759;S-Fe2_GL0005285;6-1_GL0074696	NA	NA	NA	NA	NA	NA	112430	NA	386220	NA			A2ASS6	2313600	2361800	2210200	2296400	1962700	2547400	2055900	2040200	2196700	2126300
1A-dyr4-07_GL0022802	714890	703860	825750	871100	790940	771650	769180	680300	718570	767390			A2BIM8;P02762;P04938;P11588;P11591	1294800	1189000	1566600	1387200	1290400	1489800	1482900	1622600	1480400	1750700
1A-dyr4-07_GL0023556	170750	141350	155030	140390	NA	123270	NA	155570	143190	236660			B1AVD1	1623800	1559000	1583200	1618900	1522800	1452500	1521400	1448800	1485400	1474200
1A-dyr4-07_GL0028776	220420	193270	234170	265430	326220	325080	234180	247450	193360	235970			B2RXS4	49974	51160	69031	62673	75276	43650	26735	46322	39552	54252
1A-dyr4-07_GL0029594;5_GL0087218	49126	22500	52319	NA	48838	73949	69673	54636	71733	70141			B2RY04	2289800	2601800	57388	2275700	1530800	2403800	2206000	2191000	2230800	2317400
1A-dyr4-07_GL0030450	224400	172560	213270	207190	219730	247230	267600	271150	253290	228990			B5X0G2	NA	NA	NA	NA	3972.6	72867	3043.2	11568	NA	NA
1A-dyr4-07_GL0031946	1370500	1374100	1288200	1280800	1330500	1358600	1333500	1369500	1422300	1360500			C0HKE9;C0HKE8;C0HKE7;C0HKE6;C0HKE5;C0HKE4;C0HKE3;C0HKE2;C0HKE1;Q8CGP6;Q8R1M2;Q8CGP7;Q8CGP5;Q8BFU2;Q3THW5;P0C0S6	2468000	1534000	1419800	1435400	1306600	1099800	1122400	1069600	1053300	1000900
1A-dyr4-07_GL0032842;11_GL0021639	85235	86922	NA	NA	NA	NA	70656	97514	NA	NA			E9Q0N2	113640	91549	120170	121880	102670	123300	106890	123590	121220	108180
1A-dyr4-07_GL0032843;5-7_GL0069852	70806	48921	55079	51883	53793	1126.5	50386	47852	50524	34359			E9Q3E1;J3QMK6;Q80VQ0	48146	NA	34280	NA	73701	NA	68124	67715	NA	96095
1A-dyr4-07_GL0036868	62209	65472	56604	61584	56243	69476	68321	65214	69791	56159			E9Q7P9	2725400	2635800	2547100	2534900	2522700	2461600	2402300	2403700	2400200	2411700
1A-dyr4-07_GL0038717	31987	39806	111390	63203	12261	29574	86396	137860	128720	134220
1A-dyr4-07_GL0040112	52654	64498	55015	61701	53542	75323	73665	59268	102610	106920
1A-dyr4-07_GL0042683	438640	436610	384410	338730	434470	397220	403130	389160	391100	390460
1A-dyr4-07_GL0044722	772380	744470	992550	1009200	1040800	989550	1008300	1016900	977060	1078500
1A-dyr4-07_GL0045601	70165	49739	91137	31599	37782	32756	25386	10655	NA	19647
1A-dyr4-07_GL0047715	295200	302670	248100	246920	252350	272320	271030	261410	242970	230670
1A-dyr4-07_GL0048238	NA	24416	NA	45947	49167	47066	NA	NA	NA	49037
1A-dyr4-07_GL0048670	472600	495140	517330	466130	471420	497410	476750	506660	484450	516370
1A-dyr4-07_GL0048671	173930	229770	206720	198760	205290	217030	167590	224320	209580	108940
1A-dyr4-07_GL0048823	138280	127740	110950	110640	112730	95785	84566	82623	64947	83382
1A-dyr4-07_GL0054230	39928	41475	42446	39698	42788	49115	42748	49254	44722	42477
1A-dyr4-07_GL0054244	274130	276880	275130	244790	265430	292330	233580	244660	235600	236130
1A-dyr4-07_GL0054247;11_GL0126032	107670	90647	114660	86076	65549	111160	89055	100950	113130	95425
1A-dyr4-07_GL0054950	185550	181830	117640	209670	84187	182380	168430	130960	168490	107110
1A-dyr4-07_GL0055880	141380	114070	112180	96077	93817	11551	82331	91120	NA	116270
1A-dyr4-07_GL0055881	133510	167690	156760	107060	192740	146500	161000	155260	164180	142980
1A-dyr4-07_GL0057270	18624	22683	23237	24312	23410	20606	21689	18719	18229	18032
1A-dyr4-07_GL0061974	80739	90855	68854	93276	26073	80620	NA	85772	32402	65743
1A-dyr4-07_GL0064894;Group2-3A_GL0002282;G1-5A_GL0213408;6-7_GL0116078	115680	78008	95645	98125	114320	108800	103400	100180	127500	102660
1A-dyr4-07_GL0068118	163140	161060	148650	148830	134490	171110	144870	148670	132760	149940
1A-dyr4-07_GL0069799	24904	14100	NA	NA	48719	42286	5405	NA	61817	NA
1A-dyr4-07_GL0071878;S-Fe9_GL0044734	200770	210670	148250	178350	141580	97559	167870	160990	144380	186380
1A-dyr4-07_GL0074774	798360	832560	817280	780170	806330	747910	734440	790010	803290	788050
1A-dyr4-07_GL0078029	88166	82411	77701	85757	79992	82554	81107	75827	72938	77830
1A-dyr4-07_GL0078414	37791	41619	36593	38052	39986	32870	39269	35631	31639	41171
1A-dyr4-07_GL0079687	243640	205890	292430	186540	179940	181110	172230	217200	147080	175990
1A-dyr4-07_GL0080154	156750	286600	285410	246360	130630	200550	228360	311020	234800	220130
1A-dyr4-07_GL0081851	142530	23089	NA	16372	133530	153600	180060	NA	174220	199750
1A-dyr4-07_GL0083332	349700	372410	309760	334260	322630	288840	284650	294060	290910	303110
1A-dyr4-07_GL0084261	698290	756310	705520	680980	668170	625200	599300	588350	639430	608920
1A-dyr4-07_GL0084324	795610	866750	787000	818860	807170	791810	793650	785750	792690	749570
1A-dyr4-07_GL0086302	196100	242210	189750	204810	201290	212350	204010	253890	209510	187450
1A-dyr4-07_GL0086410	200390	271410	317480	282990	270170	262310	283540	231860	269900	302190
1A-dyr4-07_GL0089321	65699	59697	50630	44466	46820	49155	43602	50038	39878	53732
1A-dyr4-07_GL0089340	316090	226350	166060	264900	265090	229740	235300	258280	227100	265350
1A-dyr4-07_GL0090449	51443	37088	67582	66128	74910	79307	90096	91280	91759	100500
1A-dyr4-07_GL0092337	525720	417820	558640	561020	523230	529040	531540	547090	597520	552320
1A-dyr4-07_GL0093212	387000	340610	373120	NA	263280	419190	247440	397560	383980	NA
1A-dyr4-07_GL0093575	145170	27490	75217	70941	55104	132710	44146	192610	78068	70810
1A-dyr4-07_GL0095483	474950	532080	473080	545020	530610	537310	544870	599270	587130	534520
1A-dyr4-07_GL0097123	NA	NA	NA	NA	29482	32319	26809	NA	NA	31173
1A-dyr4-07_GL0098195;S-Fe7_GL0065669	196230	448720	231050	315130	239620	310750	366340	500310	224550	348700
1A-dyr4-07_GL0098906	150140	138210	165270	135240	109650	138200	116450	137510	124490	113070
1A-dyr4-07_GL0099301	NA	NA	105710	115960	127190	137870	NA	121580	175870	NA
1A-dyr4-07_GL0102273	NA	NA	NA	NA	87265	NA	NA	NA	NA	83307
1A-dyr4-07_GL0103639	NA	NA	NA	96137	NA	NA	107050	341540	NA	277200
1A-dyr4-07_GL0104106	238770	287510	238560	217460	174040	136800	158300	139980	2213.5	203900
1A-dyr4-07_GL0104552	1349900	1320400	1362300	1269400	1219000	1352700	1284400	1286300	1341900	1324600
1A-dyr4-07_GL0106169	80107	95467	84530	75415	71045	51528	78230	66698	60720	94806
1A-dyr4-07_GL0106171	261620	213030	271420	234060	231730	164330	171300	195270	160880	202790
1A-dyr4-07_GL0106172	1565800	1399600	1478100	1424400	1327500	1339500	1471300	1279800	1390300	1263000
1A-dyr4-07_GL0106526	400930	353970	414310	397430	388120	381370	376440	392800	386730	409370
1A-dyr4-07_GL0106531	234740	223990	225930	229800	228000	228780	254290	223310	215960	226280
1A-dyr4-07_GL0109263	142610	156120	96850	11157	90744	113220	62178	121830	110190	83043
1A-dyr4-07_GL0109899	309130	214050	162490	200080	148080	131930	131570	79295	122590	173450
1A-dyr4-07_GL0110966	176250	141430	142400	146090	120240	117560	61142	110350	59863	112780
1A-dyr4-07_GL0110967	NA	149240	NA	NA	98097	73642	NA	125950	117650	122270
1A-dyr5-06_GL0003051	200260	176690	162540	148070	170780	180600	207580	186660	163860	173900
1A-dyr5-06_GL0004232	65043	263590	293480	350920	51439	462810	223520	592590	272480	365760
1A-dyr5-06_GL0012902	60887	54023	46751	NA	NA	NA	44772	NA	NA	NA
1A-dyr5-06_GL0015330	111380	177560	152580	116600	174960	136100	167600	134130	144320	141880
1A-dyr5-06_GL0021819	NA	92090	237870	103150	90970	218140	210730	191410	2100.8	165400
1A-dyr5-06_GL0059240;2B-dyr24-07_GL0039540;3-1_GL0089305;11_GL0017325	134540	201970	205600	211290	202850	227320	207130	215020	245950	220900
2_GL0008154;4-8_GL0022065;8-8_GL0063046	42493	48096	50486	48712	42991	42976	43323	40008	47984	35811
2_GL0032312;7-2_GL0002651;S-Fe6_GL0141242;8-1_GL0123359;S-Fe9_GL0231394;S-Fe20_GL0042327;7-8_GL0090586;MH-0-5_GL0019692	227390	232300	206540	187880	163670	203360	213130	190540	198440	232000
2_GL0037426	516860	500200	473980	474860	438500	428700	440920	433970	434420	429800
2_GL0048758	141280	106300	113960	106250	68990	104210	125470	118540	109490	112730
2_GL0058400	589190	636020	922290	831030	914610	944440	817670	768190	804970	816390
2_GL0075727	950980	933400	975530	1012600	1012200	1111600	1080800	1011900	1063200	1040300
2_GL0091357	162440	162080	148310	142680	154570	149710	138060	148090	154030	139180
2_GL0099541	204980	207800	207230	178020	174060	209110	190740	173950	223600	199170
2_GL0109744	4094700	4209400	3755600	3731500	3538000	3566300	3653400	3267800	3465100	3250800
2_GL0125294	215180	265360	206240	185710	242900	268060	250540	235900	275750	258880
2_GL0136960	27292	56421	NA	170960	173030	115860	175090	340830	236580	166610
2_GL0144406	43366	33575	51819	51564	48957	53256	NA	59834	63631	59572
2_GL0148423	30029	42907	28545	NA	43467	39215	35047	7091.4	NA	283570
20_GL0002468	127760	131040	194930	172240	166870	224330	172910	187020	191500	235410
20_GL0002873	NA	NA	NA	32508	NA	26526	29387	35921	NA	24284
20_GL0003781	3523900	3341800	3086300	3102800	3043500	2905800	3113700	2908700	2986200	2836900
20_GL0005549	483740	446940	477490	449470	487520	471020	453270	498140	460180	452980
20_GL0008685	NA	41152	53263	NA	32294	NA	NA	39568	31653	51808
20_GL0009341	130400	154210	122050	132700	113320	97863	121710	139460	125420	104920
20_GL0009554;5-8_GL0109980;1-1_GL0028661	396920	404260	386380	373500	371900	408050	413750	374910	411190	397190
20_GL0010443	598410	575970	540570	469640	504240	461750	460090	458040	405860	448400
20_GL0010568	127300	176110	114610	135310	113270	77420	86070	98853	137730	108060
20_GL0011174	76988	NA	98524	128100	125770	126780	123270	120770	118690	129310
20_GL0014719	130740	121870	118720	128740	119360	121850	124640	120590	126710	118790
20_GL0015768	606010	481910	628490	648610	608360	308110	631420	663960	665300	658690
20_GL0016446	103060	110180	105190	98240	94397	108540	103520	105260	98431	102050
20_GL0017935	NA	NA	50705	56111	7076.1	53897	50604	45822	51618	54082
20_GL0019808	642220	529390	671210	545240	561420	588630	618630	653570	616040	595350
20_GL0023401	411020	NA	274180	629180	NA	468830	23228	191150	195800	NA
20_GL0023675	243430	252250	235010	209030	217460	234690	225090	240230	192340	234950
20_GL0024012	148120	175350	106290	131050	116470	101530	106170	128460	149480	169610
20_GL0025621	NA	125080	149610	NA	NA	88792	120560	NA	NA	NA
20_GL0027333;S-Fe8_GL0149064	NA	133500	NA	134670	NA	NA	101200	NA	NA	NA
20_GL0028243	365130	389370	336240	358910	380190	408870	325070	284020	275380	290140
20_GL0029051	104270	107370	113060	87918	76024	106090	96536	106940	109700	99159
20_GL0029566	58185	42030	49339	52700	NA	52019	56483	77163	62545	60228
20_GL0032073	97638	81127	90231	100810	267470	104580	156680	31222	142600	238680
20_GL0037201	120620	171150	55742	91017	119530	32843	NA	39988	118900	144490
20_GL0037957;1A-dyr4-07_GL0079686	489090	526530	534330	497900	538280	517380	546210	529530	516000	559870
20_GL0038208	109880	101370	101050	85464	92564	81597	83285	97626	71366	74502
20_GL0040658	513170	523440	435840	398510	447260	510810	453060	510100	502350	525440
20_GL0041115	NA	29539	40877	40228	NA	NA	NA	38829	22690	39442
20_GL0041194	764340	820680	745960	806630	758470	797090	771500	763630	754180	726230
20_GL0048707	514120	525060	546400	443810	468100	512080	420920	448390	389570	426600
20_GL0049210	174660	185350	156680	165490	143750	154920	167070	166660	159860	158080
20_GL0052656	405930	500660	389140	417710	242040	541650	295490	425490	377520	180950
20_GL0053555	208840	227510	184530	171350	86585	148180	152080	384010	149120	279290
20_GL0054119;1-1_GL0104706	36174	31742	34729	30794	33110	40722	54750	60007	58773	43632
20_GL0054153;17_GL0083926;2A-dyr14-07_GL0067403;S-Fe9_GL0291491;Group2-6A_GL0076595;1A-dyr2-07_GL0001235;17_GL0130412;17_GL0063405	118300	121800	110920	108520	101710	110780	119890	116260	116430	117300
20_GL0054836	139690	133100	172900	178550	193020	155960	206520	152870	153140	175610
20_GL0055703;Group2-1A_GL0047679;1A-dyr4-07_GL0079615	39645	NA	47867	NA	NA	45820	49232	39363	NA	NA
20_GL0059666	372550	403140	381560	349620	354450	350220	330520	319920	340260	327990
20_GL0060803	8239100	1958800	10568000	27242000	2300100	12319000	60427000	514580	NA	18095000
20_GL0061686	43586	43615	49778	77405	55705	55219	55507	65781	54842	49594
20_GL0062175	362560	391150	342270	417230	379630	394130	424950	383240	392680	388290
20_GL0062363	365450	390860	355360	304720	307720	317970	294020	310830	275120	299850
20_GL0063005	37352	37848	38290	46207	49401	51977	48520	54293	62551	49596
20_GL0063644	63534	91824	84518	90714	88973	69439	63721	153110	73272	71503
20_GL0068488	151630	147910	153630	159630	146530	160820	148650	163030	166460	158810
20_GL0071933	61997	79243	77230	82089	83795	82090	73724	78458	76555	76917
20_GL0075446	31797	29456	39253	43130	37741	18522	50011	45243	25014	33950
20_GL0075449	NA	51515	NA	15119	56985	NA	41895	130450	53528	NA
20_GL0075489	126750	144250	135150	117870	132070	123740	133300	118170	117480	133920
20_GL0076783	192690	688550	1051700	300130	3138200	198820	660410	641890	873360	1046600
20_GL0082096	2545200	2385200	2243400	2116000	2219800	2150400	2197000	2187100	2168800	2253000
20_GL0086333;7_GL0080347;Group2-8A_GL0128941	472100	464600	420770	456890	389820	296290	275460	258180	299590	266520
20_GL0086411	235010	351540	91223	238700	387180	371010	246000	97327	187490	236230
20_GL0090419	783560	863890	924070	955360	952810	903340	873470	948810	798610	870980
20_GL0096466	385440	372470	310450	285690	303420	310430	284740	268170	293920	258820
20_GL0098510	347990	335750	352660	351160	345900	344630	361330	334540	345600	327250
20_GL0099725	441670	445170	363590	361310	404660	356860	333570	354270	347940	377170
20_GL0100113	534350	368730	NA	850440	842740	653250	787220	585870	414630	NA
20_GL0100646;1-7_GL0129238;S-Fe10_GL0110934;S-Fe10_GL0027232;MC-6-2_GL0125781;MC-6-1_GL0076511;MC-0-1_GL0097529;MC-0-1_GL0000892;G1-1A_GL0068698;40_GL0008478	367770	NA	293990	NA	NA	140970	NA	NA	NA	225920
20_GL0101824	346910	380180	384420	439840	404530	414640	455200	451480	542990	528000
20_GL0102855;26_GL0124273;17_GL0117854;17_GL0097567;26_GL0098299;2A-dyr13-07_GL0028092;Group2-6A_GL0027993	126240	120830	139340	144460	128280	163590	146160	195960	185940	147520
20_GL0103470;S-Fe7_GL0257815	211080	175020	173800	201060	207980	204960	229840	211520	245170	195440
20_GL0103614	66185	18151	40463	58527	128990	21466	153920	152360	94630	146640
20_GL0105336;8-2_GL0112663	286130	304850	258020	309090	248210	267190	247410	243580	223380	210740
20_GL0108700	458370	NA	586530	583300	585920	572230	NA	597220	589770	NA
20_GL0110130	NA	NA	52091	53339	41820	52845	56315	51499	49254	50199
20_GL0110156	409790	423590	418910	404060	405940	381990	392860	385220	430580	352100
20_GL0112071	801220	864430	747770	955440	693530	384370	714550	588850	775350	640280
20_GL0112751	326470	324810	310420	305830	291150	211440	296110	292530	292580	255560
20_GL0113859;G1-1A_GL0083616;S-Fe12_GL0186143;G1-5A_GL0158631	132130	135200	124200	159580	123470	139930	117520	88602	131440	134450
20_GL0114457	23912	48914	9640.4	40309	64406	58502	59340	65159	57823	36259
20_GL0114520	75903	67762	76344	NA	73744	89753	87748	83706	70466	85276
20_GL0115411	55515	52742	42136	45332	43818	55167	47154	49947	59088	55616
20_GL0118731	5281300	5178600	5721500	4129000	5504900	5747600	5571400	5084900	5299200	5508900
20_GL0120325	113850	95069	NA	71016	53944	63478	NA	40721	108580	60331
20_GL0121992	324740	260240	505710	328600	412350	366880	246720	233440	288270	241470
20_GL0122417;11_GL0131220;Group2-7A_GL0012768;6-2_GL0045494	335610	369130	307060	328590	317570	290140	308740	263680	276690	278340
20_GL0125594	246560	198190	242350	283960	263570	240610	274950	287890	272160	247090
20_GL0126153	79236	110370	967390	298290	804310	827200	434020	763970	292950	NA
20_GL0128104	177020	154390	164690	157040	168330	149600	157870	162180	166230	189370
20_GL0128292;11_GL0033535	56919	63873	69077	49463	50994	NA	NA	66615	63969	43344
20_GL0129676	748700	692090	701550	582420	731670	782480	786660	718760	736260	748990
20_GL0130302	NA	NA	NA	30163	NA	NA	NA	NA	NA	36382
20_GL0131076	1058700	920850	1106800	1233500	1177500	1273800	1293500	1088300	1079100	975840
20_GL0131578	60884	70765	68053	63155	60049	78280	69919	57242	55367	68064
20_GL0132005	298450	294510	281820	1966.7	272810	NA	274730	151200	NA	247830
20_GL0134575	378860	328220	445800	469550	508850	497130	518490	515670	488960	466400
20_GL0137114;17_GL0100890;S-Fe2_GL0046547;S-Fe1_GL0109407;S-Fe9_GL0218513	46571	44265	53540	69596	65674	55454	53985	61161	61684	66657
20_GL0139296	18454	124530	24930	30861	27122	NA	NA	NA	31927	NA
20_GL0140601	39010	40390	43095	35637	34416	NA	204470	NA	186870	44418
20_GL0141044;7-5_GL0045867;MH-6-4_GL0062157	160640	180620	160030	166420	169780	150820	167110	164600	135340	148800
20_GL0144797;5-4_GL0059287	530960	444050	569390	544030	560630	540190	542900	533040	525910	551350
20_GL0147742	1300000	936410	1103500	1197200	1122900	1058000	995920	1102500	1105700	910850
20_GL0149676	143500	14170	NA	97895	152480	NA	104470	94358	94724	161820
20_GL0150260;26_GL0110301	265100	276560	259470	269880	256850	252090	257310	236670	294880	243640
20_GL0151793;MH-6-3_GL0045414;MH-6-3_GL0002555;MC-6-5_GL0029895;Group2-7A_GL0109277;S-Fe8_GL0182684;1-2_GL0127586;1-1_GL0053280;1-1_GL0108808;41_GL0079325;Group2-6A_GL0112269;Group2-3A_GL0116303;S-Fe7_GL0106544;MH-6-5_GL0015097;MH-0-4_GL0053297;MH-6-3_GL0136632;38_GL0029624;S-Fe6_GL0125476;MC-0-1_GL0109708;S-Fe7_GL0050647	79626	77016	104520	82432	65345	78972	56634	67756	79644	83488
20_GL0156552	511030	505940	500730	496880	479800	504170	524750	532830	511050	513570
20_GL0156837	466520	492650	523000	526530	490830	439660	488120	473670	470100	482660
20_GL0160305	NA	23592	16178	22307	NA	NA	27355	12403	NA	19303
20_GL0161385;S-Fe7_GL0266673	37580	61234	60971	43490	57722	45532	41903	42831	48143	41919
20_GL0163312	298530	NA	281400	314040	351110	342490	358340	369570	288480	317990
20_GL0163715	698030	654020	605710	1191300	652720	NA	515940	508030	762460	442880
20_GL0164740	NA	195830	152160	166140	168680	184190	176610	179910	179040	182840
20_GL0165003	NA	32672	48915	NA	NA	45922	42575	55262	37059	61282
20_GL0165667	98241	104900	93258	123740	121770	113250	119940	108250	106650	93474
20_GL0169665	548110	715400	561720	640790	684050	496560	644800	559810	599540	759110
20_GL0170323	68377	56968	NA	65329	65379	NA	71753	62231	70559	93450
20_GL0174229	438920	419820	421790	397410	366200	329930	331530	306010	284330	330580
20_GL0174232	78883	69839	NA	70598	59497	61507	NA	NA	NA	79450
20_GL0174234	123950	175230	185860	208250	177770	243410	221700	259800	201000	179340
20_GL0177940	33899	40857	39228	NA	39900	35146	113220	28125	36624	28366
20_GL0178293	264600	271150	270830	270910	244060	222790	235750	207440	212060	233120
20_GL0178642	203200	163700	165330	172670	146260	188720	170940	177780	133550	148710
20_GL0179942	NA	NA	NA	39131	NA	NA	NA	NA	61627	43161
2-1_GL0000285	45687	49848	46588	40818	40302	42036	38858	34248	43781	43325
2-1_GL0000668	114180	109020	90278	103000	94464	101540	108150	104340	104950	105790
2-1_GL0000769	879090	927720	783060	883960	871160	911060	827800	866380	902230	751340
2-1_GL0001288	314700	156410	157540	176250	193710	339590	166720	196610	104230	228660
2-1_GL0002791	248780	275820	289880	295880	302750	192570	425800	314010	371570	305110
2-1_GL0004454	352960	319870	291650	295180	291490	214050	165490	277820	233510	245780
2-1_GL0004689;31_GL0065912	278340	275120	248910	253700	NA	236630	255370	247580	199620	265960
2-1_GL0005243	792330	805950	841020	758980	830350	840700	909750	928600	805460	921820
2-1_GL0005249	627430	725930	605320	555540	570920	25622	586830	690910	513710	484910
2-1_GL0006662	60938	46132	79790	58481	78728	61869	66948	56267	46409	59744
2-1_GL0006967	351440	452210	385000	504330	541630	608940	588760	430860	489540	556080
2-1_GL0006988	552390	430390	504430	509270	501100	486050	480330	502860	483430	466980
2-1_GL0006992	276750	245440	69810	238900	151490	260620	172260	242480	149790	240230
2-1_GL0008249;8-2_GL0062281;5-4_GL0018213	67060	71686	54341	57739	60431	69847	58877	71681	61659	63847
2-1_GL0009313	341490	300870	289480	339970	274830	113440	267100	199310	170310	252670
2-1_GL0009411;20_GL0046769	372680	248620	342520	393900	490290	472280	816930	627170	462760	678500
2-1_GL0009413;S-Fe12_GL0083542;2-1_GL0087633	686980	759970	725470	668110	665620	642160	639450	593720	587450	573870
2-1_GL0009421;5-2_GL0102415;2-1_GL0087625	1135600	1238600	1301300	1321300	1388300	1291800	1232800	1291100	1306400	1304100
2-1_GL0009641;G1-1A_GL0056480;Group2-3A_GL0035594	NA	NA	142760	132100	130370	NA	98533	NA	117960	126380
2-1_GL0009642	200990	260680	251790	236940	222150	232730	229860	219920	234620	224130
2-1_GL0009672	15556	15731	17159	14060	15310	17930	17016	NA	19368	16750
2-1_GL0009700	1259300	1399100	1366900	1435000	1436600	1198100	1359900	1194300	1301300	1183200
2-1_GL0009701	446000	398540	405600	414260	405200	363510	342390	319810	309250	263980
2-1_GL0009703	219030	214950	196140	221760	178240	164770	164550	153410	149870	157530
2-1_GL0009760	1046200	839770	868480	873810	883890	843880	797020	742240	860820	786070
2-1_GL0010167	414270	468000	471710	451020	354460	523760	465200	512280	446150	400840
2-1_GL0010197	912830	909780	949010	993060	958050	959020	856000	834720	772970	867370
2-1_GL0010247	306810	257690	211860	312770	289370	259340	243870	253020	282450	253210
2-1_GL0010886	166900	185420	159150	160880	162740	174970	166680	174270	194900	143690
2-1_GL0010887	175900	170480	255160	210730	82376	184220	208760	200910	168810	160000
2-1_GL0011115	105090	187410	170770	224680	167010	198720	185440	133670	188450	227100
2-1_GL0011438	53409	NA	42821	NA	37554	35956	34489	38126	35531	33858
2-1_GL0012023	133590	84258	73230	96140	130910	184490	160580	217610	163640	110530
2-1_GL0012776	137800	105090	48818	123860	145960	120990	150760	152250	131830	112590
2-1_GL0015007	537250	534270	525540	519740	508880	537630	523570	527850	514730	530860
2-1_GL0019333	33605	NA	35823	NA	42567	50792	55552	55530	NA	NA
2-1_GL0020053	80849	84419	116090	112050	93435	100680	109410	99011	87269	39068
2-1_GL0020071;MC-6-5_GL0093809	137450	165660	65156	110260	99661	102840	53667	NA	79571	63195
2-1_GL0020085	124110	121000	129860	121970	146010	202340	142650	144950	151140	101030
2-1_GL0020961	NA	96275	124590	NA	NA	112390	115050	NA	95747	NA
2-1_GL0021062	20193	31281	NA	20499	20871	4521.3	27994	28534	27116	26839
2-1_GL0021252;5-2_GL0101286	44620	47415	43558	39329	43658	57263	43691	43747	46501	47306
2-1_GL0021623	182180	NA	NA	NA	NA	NA	NA	NA	312370	NA
2-1_GL0024423	18804	21707	15534	14584	13378	17775	18292	19572	20331	21443
2-1_GL0024446;2-5_GL0012958	265530	277740	240830	219020	182090	206050	188500	198150	199800	169530
2-1_GL0024451	128330	126790	121880	118000	109500	127780	119620	130510	127160	135810
2-1_GL0024466;31_GL0056107	190010	243940	181810	196930	201060	209080	191250	184780	213600	209340
2-1_GL0024475	1226600	1170300	1071900	1023500	974700	980700	886930	956910	959250	922380
2-1_GL0024477;31_GL0082075	4496300	4808300	4463100	4434500	4255000	4158100	4019800	4038100	4108800	3767100
2-1_GL0024479	192470	218510	279740	304000	342070	363280	322020	336450	515540	465120
2-1_GL0024480	156600	151650	165040	161920	177810	140110	135880	123100	120530	102000
2-1_GL0024490	1981500	1696700	1833200	1765700	1525000	1570000	1718900	1556000	1605800	1671500
2-1_GL0024923	21883	77570	71353	NA	87079	59288	90292	85006	NA	NA
2-1_GL0025618	180290	193500	168940	161000	172270	188290	161030	180650	183540	167890
2-1_GL0025625	89277	77622	94978	76899	89940	93186	83786	115940	78332	128250
2-1_GL0025767	450970	519230	599410	642620	614320	680480	607730	642270	666830	663210
2-1_GL0026526;31_GL0090396	1069400	1149700	1207600	1163300	1077100	1148900	1199200	1240600	1260300	1074000
2-1_GL0026530	119700	112320	94969	85280	82512	77480	63306	71059	75480	121810
2-1_GL0026536	669580	602510	687260	681250	688780	666220	636200	634490	563850	656060
2-1_GL0027603	170200	143160	123800	152100	149280	127220	132780	131660	147690	146360
2-1_GL0028796;4-1_GL0047515;7-1_GL0005029;5-4_GL0037331;MC-6-2_GL0018649	63325	87798	NA	NA	NA	65160	NA	NA	62164	97198
2-1_GL0029142;5-2_GL0034803;2-1_GL0063176	28216	NA	54446	NA	54331	35909	36937	38395	51031	52065
2-1_GL0029154	741910	787150	739890	725460	701210	765950	748110	756970	756800	825760
2-1_GL0029307	254470	263100	240830	232920	235400	256630	255330	252180	259390	229370
2-1_GL0029363	247770	68073	147910	142610	157070	122700	148210	126480	186760	188160
2-1_GL0029802;2-1_GL0087642;S-Fe11_GL0038363	NA	NA	64527	47143	84923	NA	69981	79226	8435.9	63518
2-1_GL0029805	259260	252460	NA	257150	258220	210440	NA	272390	NA	53057
2-1_GL0030751	61895	95037	91993	NA	39633	61036	65477	NA	110790	NA
2-1_GL0031200	NA	NA	46952	30447	NA	63149	111170	21793	NA	28485
2-1_GL0031408	872270	935440	907570	907470	977550	939010	894410	858600	905980	842090
2-1_GL0031576	84817	89338	86998	98859	99546	103660	NA	107550	107030	112740
2-1_GL0032220	418330	428900	413650	405050	392920	426760	432170	432040	427340	426030
2-1_GL0033208	224080	238320	242290	245660	237860	245000	235960	230390	233090	244720
2-1_GL0033262	136320	117140	110880	122370	114730	108680	113970	104840	110440	99110
2-1_GL0033349	1133000	1185600	1080800	1060100	1051400	1042000	1177000	1103200	1137000	1102200
2-1_GL0034812	190800	201100	237180	272840	262940	248870	248830	266100	249000	239890
2-1_GL0036258;5-2_GL0103665	1467200	1451400	1390500	1510900	1443700	1487700	1583400	1457600	1583700	1736500
2-1_GL0036491	810150	740990	719490	792240	745550	740200	913210	965080	795150	787750
2-1_GL0037625	200870	186950	193670	211090	185750	177950	199120	175100	153620	192090
2-1_GL0039363	NA	NA	NA	NA	NA	93109	94646	89290	NA	102080
2-1_GL0039511	128020	150100	55153	35422	54422	20672	117250	70168	96630	114710
2-1_GL0039512	NA	237870	273830	NA	NA	NA	NA	NA	206480	NA
2-1_GL0039651	88324	70278	132640	263230	217480	216990	190080	67890	145330	287730
2-1_GL0042309	93170	87580	86215	85147	144030	101700	98419	NA	43885	150030
2-1_GL0042755	208730	240890	245130	254780	262520	248210	258710	272140	230340	255100
2-1_GL0043938	720540	814820	679970	655130	630090	536930	594950	619070	564890	556010
2-1_GL0045814	466920	402090	434470	460810	478300	491540	485270	471360	480870	501680
2-1_GL0046786	41605	37095	38719	44726	54526	NA	46947	NA	45425	43334
2-1_GL0046905	713300	705080	834460	871960	936970	925860	891980	862110	879940	939540
2-1_GL0047226	284380	167780	279260	233980	275160	223450	211650	233150	205940	209050
2-1_GL0047228	101680	124880	175300	228840	30725	227360	NA	229540	228420	206720
2-1_GL0047628;11_GL0004412;6-7_GL0077416;G1-8A_GL0085502;6-1_GL0053071;31_GL0067678	544220	610050	706140	696850	775700	740870	752140	882970	795190	770880
2-1_GL0047643	37601	32423	29402	33528	39453	34668	36286	33175	NA	56077
2-1_GL0047644;2-3_GL0095440;G1-1A_GL0068928;5-2_GL0029612;2-6_GL0045970;1_GL0003708	58818	80580	NA	60436	60018	66986	64961	62005	79724	NA
2-1_GL0047729;S-Fe12_GL0048671;G1-1A_GL0033740;1-1_GL0036243;34_GL0006378;1A-dyr1-07_GL0047372	828510	850460	705160	569200	498410	809260	695620	753480	811000	606520
2-1_GL0047991	1292900	1211400	1115100	1140500	1100800	1039500	1107700	1045200	993090	1009100
2-1_GL0048386	191610	1387000	950560	1551300	1349500	1907500	1437500	1411000	1516800	1291600
2-1_GL0048884	135540	61921	114550	104400	101210	99871	120470	109790	106260	59908
2-1_GL0049860	219430	222220	203420	226690	227640	229630	205760	208670	205230	199520
2-1_GL0050302;8-1_GL0066398	459180	447660	422980	426640	414150	444150	415590	439570	451230	432260
2-1_GL0050430	176770	192730	168490	160250	193990	176650	181250	197110	206830	214500
2-1_GL0050696;23_GL0000753;Group2-8A_GL0218094;3-5_GL0038173	67134	42333	60142	59263	51537	51547	53448	55605	58177	55771
2-1_GL0051897	189310	153050	NA	NA	NA	128820	170890	106500	133610	NA
2-1_GL0051898	66275	90236	92269	101190	84312	81193	76647	76870	83442	67662
2-1_GL0052075	98971	152640	109270	174140	82716	186360	NA	147470	192570	205650
2-1_GL0052080;5-2_GL0065055	283920	193930	243490	244040	270100	250950	237230	181130	262000	188530
2-1_GL0052084	625000	611680	601600	550320	577480	548350	478960	489400	533640	743350
2-1_GL0052085	641040	631440	472500	527440	525620	555050	542630	532180	537960	456100
2-1_GL0052359	160100	444830	NA	163150	393860	461990	NA	413370	NA	NA
2-1_GL0052492	1444700	1378900	1221300	1277000	1227600	1129600	1171100	1065400	1199200	1107200
2-1_GL0052682	545800	569630	579620	501400	524050	515650	498200	392980	486290	445520
2-1_GL0054607	301710	302360	267800	289670	270260	248680	248150	278890	265890	256460
2-1_GL0055223	896850	549430	1113300	1058300	839030	523000	821600	1276100	1393400	335410
2-1_GL0056143;8-1_GL0121720	233330	246830	181010	198440	175240	180710	172890	187090	192320	169810
2-1_GL0056349	639220	839280	557840	643790	731210	683710	705380	567850	749910	625170
2-1_GL0056880	118220	147630	182160	160100	183700	229820	193640	204110	201680	218690
2-1_GL0056886	318040	359150	288990	322930	328600	289610	297710	280510	298940	312620
2-1_GL0057479;S-Fe12_GL0053547;5-2_GL0081782;1-1_GL0051612;17_GL0096479	1759700	NA	NA	NA	NA	1893900	2047500	NA	NA	4207.4
2-1_GL0057480;17_GL0071818	280440	NA	262510	196110	233340	273020	NA	197410	293490	304400
2-1_GL0057481	315430	349930	366830	416590	407690	333910	297840	257820	245760	287810
2-1_GL0057678	71819	NA	47769	38688	NA	51678	46010	47118	54390	41489
2-1_GL0058375	80766	94696	99478	133390	124940	186990	NA	NA	187330	205050
2-1_GL0058833	NA	47051	NA	NA	NA	50117	32145	50046	2117.2	34715
2-1_GL0059318;5-2_GL0083784	306160	114280	61071	22340	105540	294150	106510	102980	90202	20670
2-1_GL0059320	223250	257900	217860	207660	201970	223190	210200	213450	214330	202180
2-1_GL0059565;S-Fe8_GL0160863	1028100	1137900	948740	1003000	1030700	927970	928520	972430	1007800	888690
2-1_GL0061088	824780	784510	817020	841010	822680	830130	804690	772010	789710	755740
2-1_GL0061095	75212	96468	61321	74920	70230	66960	79718	87566	65055	NA
2-1_GL0061307	931490	930750	753030	931520	701270	760530	797000	746530	773110	822680
2-1_GL0062493	229960	237460	208990	NA	191530	204750	218610	222050	178460	185540
2-1_GL0062746	111410	80316	21298	100710	181500	45457	222580	109420	135110	93909
2-1_GL0063170	372430	353210	347720	308920	283180	266160	294600	301900	269940	315350
2-1_GL0063224	40589	42983	35258	29577	16687	23741	39993	30252	37800	40257
2-1_GL0063845	479690	341980	453760	397070	407150	393490	418640	447200	391200	424150
2-1_GL0063846	16555	229390	241640	236050	258110	224130	190960	203620	193670	187980
2-1_GL0063867	655460	710040	690430	703830	619920	652780	659030	643490	660840	638300
2-1_GL0064618;31_GL0018182	1671200	1850600	2050600	1928500	1763500	1799300	1948200	1665400	1748600	1993400
2-1_GL0064620	21218	27973	65547	72788	29419	32065	31222	9695.8	23924	32374
2-1_GL0064815	191450	155700	264560	151790	139720	125000	153630	163190	165470	166040
2-1_GL0065396	1611600	1455600	1476800	1520800	1379800	1446200	1401300	1391800	1361600	1370400
2-1_GL0066566	410960	452180	375610	227880	335800	391950	402420	403770	327160	341180
2-1_GL0067158	1846000	1816500	1713000	1745500	1672500	1718700	1519500	1595400	1487000	1393100
2-1_GL0067955;5-2_GL0015477	181690	177450	238550	200980	226250	208960	231000	215370	213660	245860
2-1_GL0068363	794110	755290	862890	922050	856050	839060	861210	824160	843290	848550
2-1_GL0068385	NA	121510	94587	NA	108860	331600	25969	119620	352220	122280
2-1_GL0068386	240990	NA	103870	264790	252750	331660	301230	265840	318710	391910
2-1_GL0068730	152930	66864	79249	106450	141760	63633	80686	174290	82480	117640
2-1_GL0068896;1-2_GL0064638;MC-6-3_GL0093400;S-Fe20_GL0151347;S-Fe10_GL0002382	159310	58040	70497	106210	137280	NA	88565	135120	96845	149980
2-1_GL0069145;MC-6-1_GL0108415	NA	123590	94968	66640	14540	66683	NA	NA	NA	68763
2-1_GL0069415;S-Fe12_GL0187600;G1-1A_GL0042835	1039700	954520	1260900	929220	604460	1015800	836160	1142600	1066100	813580
2-1_GL0070543	292980	187430	156470	334400	202660	247720	208940	329030	230220	NA
2-1_GL0071086	1033100	1337600	1489400	1414200	1579100	936060	1223000	1165800	1017900	734260
2-1_GL0071457;S-Fe6_GL0031620	317770	262740	334520	358070	377960	404480	389450	399130	359000	347420
2-1_GL0071461	156140	237840	182660	122230	178250	211010	68571	298330	203380	251650
2-1_GL0072207	257970	261620	259190	203170	201800	207050	195930	212390	217010	226250
2-1_GL0073193	247920	152450	223970	324190	211510	170470	263620	132000	9891.7	249120
2-1_GL0073987	194840	178390	189610	216010	187560	173010	185750	180620	173580	178830
2-1_GL0074921	101950	105330	87689	96731	63408	100690	96089	88921	80351	96449
2-1_GL0077441	551660	540900	457500	580660	523660	387260	502090	444660	465530	434530
2-1_GL0077992	138590	149780	NA	142390	NA	NA	135520	137740	132750	130820
2-1_GL0079956	75087	68046	62960	52125	53532	92754	95266	105750	85236	103630
2-1_GL0080115	518050	475150	482270	492640	443740	507340	480450	487980	455630	467360
2-1_GL0080403	496730	810080	356530	781880	234580	555450	30301	31752	521830	387280
2-1_GL0082032	114450	60425	121960	NA	124970	127800	116830	NA	NA	163530
2-1_GL0082133	80364	67779	28127	NA	NA	NA	NA	NA	NA	NA
2-1_GL0082143	245770	352480	302030	224860	262080	196620	226450	232170	188600	253750
2-1_GL0084435	184610	156960	144830	132790	93248	107620	115560	93718	105130	112800
2-1_GL0086392;1-1_GL0030056;5-2_GL0064278;2-1_GL0067568;14_GL0110599;4-3_GL0042365	55108	58679	71693	64604	78894	54565	67355	61416	62508	69923
2-1_GL0086441	308510	311290	322570	365510	304780	330930	299860	305490	304810	308360
2-1_GL0086447;31_GL0016479	144190	155880	185760	193460	210450	193840	205950	191880	188980	197460
2-1_GL0086496;5-2_GL0015473	572410	497380	530900	478940	518180	500220	485240	429030	521080	504020
2-1_GL0086497	761900	791400	780840	819700	789480	734480	774280	689940	746430	744270
2-1_GL0086498	770030	743280	691100	713010	673860	726710	785590	741430	726100	759300
2-1_GL0087205	497460	562300	498920	484450	479650	510840	426770	471150	444250	455300
2-1_GL0087623;5-2_GL0102413;2-1_GL0109054	223260	189450	239540	225100	251440	212390	229080	208420	231900	265600
2-1_GL0087635	658030	704430	728280	798560	708790	656340	702480	669920	611930	674930
2-1_GL0087636	145030	119170	145760	122770	114840	124780	158080	166360	100090	157540
2-1_GL0087638	183260	178720	179860	188590	193290	185820	88075	190720	168620	193750
2-1_GL0087705	113770	278310	254550	NA	NA	NA	13427	NA	42589	NA
2-1_GL0087710	31891	48047	139030	NA	69448	107150	99562	96801	82863	62737
2-1_GL0087711	194430	193830	192980	186260	175940	167310	171560	188050	168660	179360
2-1_GL0087715	53981	62782	NA	NA	81494	NA	NA	NA	61094	NA
2-1_GL0087720	96566	25265	80378	NA	76537	55200	58182	NA	NA	NA
2-1_GL0089416	445170	501780	472770	506070	438710	448280	480820	474490	492940	488010
2-1_GL0090550	27686	27098	30686	30113	29205	29231	25550	29926	30453	27375
2-1_GL0091350	645580	641540	667560	692270	645860	564460	680160	665600	517870	659210
2-1_GL0091352	156920	166970	143080	163350	149540	154210	157160	136670	156960	123130
2-1_GL0091359	99270	85485	84637	89196	92282	96460	103830	90894	90677	100370
2-1_GL0091641	65757	69620	NA	139810	80163	79436	95414	54874	96983	52708
2-1_GL0091811	312990	270170	286440	291260	335880	349870	315080	329530	307830	351510
2-1_GL0092823	365480	344950	360470	132490	273660	277990	280910	243360	263600	251670
2-1_GL0092825	82898	117010	134170	123330	124860	135100	126480	189440	142400	128840
2-1_GL0093175	268460	241700	312220	277780	273920	307630	282550	260320	275020	253610
2-1_GL0093184	193750	145460	61924	137550	114920	130870	149730	178470	202950	172290
2-1_GL0093185	310390	294310	317060	318780	344150	359090	324660	336160	303180	320720
2-1_GL0093187	1747700	1668500	1726300	1742600	1756700	1739900	1724100	1703800	1641800	1646000
2-1_GL0093189	56578	69868	66389	89144	57380	64211	39471	76500	94819	62129
2-1_GL0093194	120610	109010	110050	99586	111040	115670	119720	117390	104710	118660
2-1_GL0093764	32070	43770	31807	34277	51286	44549	37543	NA	29942	34425
2-1_GL0094538	NA	26570	NA	33523	31081	33239	7671.6	39024	36142	33672
2-1_GL0095220	3529900	3542200	3289200	3410700	3252600	3360300	3228100	3142800	3199500	3611600
2-1_GL0096565	40966	53971	39536	32750	32013	NA	29577	27650	24802	27409
2-1_GL0096566	75584	108170	85924	70171	42973	64996	66688	78256	46049	64436
2-1_GL0098741;2-1_GL0053158;S-Fe3_GL0197601;Group2-4A_GL0106292;2-6_GL0036819	1539000	1375800	1422400	1518500	1484300	1427800	1430300	1446500	1477000	1468200
2-1_GL0099634	72694	80717	77032	75635	65819	77911	90781	86427	79512	86551
2-1_GL0099638	NA	90380	65887	69639	70647	NA	83180	88851	97451	NA
2-1_GL0099646	500100	503870	514710	487850	459800	497010	445250	386430	632860	502020
2-1_GL0100020	376050	640380	715950	1109100	799420	867310	1005800	653780	799670	704100
2-1_GL0100797	14310	NA	11906	13137	11906	NA	18385	18460	NA	17200
2-1_GL0101074	18292	102280	NA	58218	14289	47935	122770	97840	60158	111720
2-1_GL0101233	547310	535260	510960	517620	489020	499940	518510	484330	503960	530250
2-1_GL0102243	151690	87273	773800	NA	127630	77833	NA	118090	39702	114470
2-1_GL0102246	293030	132610	140340	114280	110460	128250	85194	92061	110180	80214
2-1_GL0102249	141480	144860	145330	141460	130660	136060	140020	138490	135590	142040
2-1_GL0102347	419160	527310	379530	456550	383270	167210	462290	627180	506260	478200
2-1_GL0102389	667290	683480	741020	778890	764060	747950	715320	680020	670450	742180
2-1_GL0102390	138780	175760	137080	138380	132910	140560	143930	127630	136740	127780
2-1_GL0102392;2-1_GL0100511	225620	190940	207550	196130	189970	204350	203650	181440	189030	200010
2-1_GL0102395;20_GL0006363;1-1_GL0008645;1_GL0011591;2-3_GL0062050;8-1_GL0061360;6-2_GL0004784;S-Fe12_GL0209882;1-2_GL0119759;MC-6-2_GL0065858	115740	101720	87513	91958	93622	80033	63296	71507	69179	77892
2-1_GL0102471	46436	36466	71761	102370	NA	82588	99143	93129	78564	NA
2-1_GL0103051	451710	381720	358910	407360	450450	393660	395560	567720	404970	446040
2-1_GL0103436	135510	139480	127990	114550	114620	123470	129940	113850	109370	114960
2-1_GL0103739;G1-1A_GL0051997;6-2_GL0036741;3-5_GL0040884;S-Fe12_GL0080717;1_GL0086842	486780	479850	491070	461660	499720	484720	511860	585560	517500	381800
2-1_GL0105493;7-1_GL0076022;S-Fe8_GL0195565;6-2_GL0032239;2-7_GL0009163;MC-6-1_GL0053362;4-1_GL0001158;3-8_GL0043860;MC-6-2_GL0185758	24649	25186	20840	31438	28402	26991	24108	25162	21739	29677
2-1_GL0106075	226850	171930	187650	225400	231520	247980	255180	239010	259900	232640
2-1_GL0106087	346800	321670	309520	326440	295460	323090	335010	369560	362970	374930
2-1_GL0106098	202450	186470	205750	206850	191980	210330	205670	204120	200190	221820
2-1_GL0106271	NA	10055	35938	22096	52925	30386	26626	24350	49765	22854
2-1_GL0106280	463450	391230	425560	438230	451880	500080	NA	453360	NA	475590
2-1_GL0106619	4434900	4575400	4370000	4307500	4167000	4059600	4104200	4023400	4244900	3877400
2-1_GL0106621	92016	113750	125920	119130	123870	116380	139280	114150	133460	134480
2-1_GL0107798	1142300	1130700	1000000	1075400	1023000	977140	980990	967320	999970	929760
2-1_GL0107809;5-2_GL0005981	105110	108160	103630	98331	114410	131250	132500	123230	109290	105560
2-1_GL0107926	29210	30386	47585	35339	21492	69434	5875.1	29230	52392	29604
2-1_GL0107966	276450	235080	300480	355610	330950	335230	319070	333560	348270	444330
2-1_GL0109469	126130	146790	117370	125300	130930	143870	122140	136830	132480	134330
2-1_GL0110697;5-2_GL0041195	334030	100280	327520	329530	392930	332260	433560	320600	349010	281740
2-1_GL0110699;5-2_GL0041197	298400	354520	271350	232840	356360	319430	196390	161950	303210	403970
2-1_GL0111147	299600	315590	329350	323340	331350	296710	253860	304120	288390	302710
2-1_GL0113853	167450	174230	126230	164790	162550	142730	160270	151990	174670	148400
2-1_GL0114667	43425	55359	45817	61393	58288	46169	71812	53283	NA	52618
2-1_GL0114780	493490	522570	510830	495200	508900	532680	503320	564990	558700	520040
2-1_GL0114903	74051	76771	NA	69815	NA	76477	68035	78977	69781	NA
2-1_GL0114928;2-3_GL0062107	156080	124040	162010	NA	NA	146140	138070	159620	122140	NA
2-1_GL0114934	207830	163210	141150	129860	135140	148340	155870	131490	181290	154950
2-1_GL0114961	343150	291080	375620	378410	387330	378430	398200	385300	381700	388200
2-1_GL0115160	202680	180160	189590	181910	164800	182030	208520	191270	193960	226290
2-1_GL0115202	539380	530900	560140	474320	618380	492880	444400	440310	444910	451690
2-1_GL0115345;Group2-3A_GL0004536	724470	673350	669380	754110	703520	629780	673480	586650	629150	666440
2-1_GL0116556	101480	131590	115130	128650	115820	119110	141560	110980	105700	104920
2-1_GL0116859	242770	223910	198420	205710	208040	175490	196920	186090	195150	139440
2-1_GL0117031	21813	24897	23205	18244	17632	23467	26658	28459	28956	28344
2-1_GL0117668	128260	67077	21576	NA	17124	30356	NA	43238	15349	NA
2-1_GL0118084;2-1_GL0032121	368480	381980	387680	401320	306850	365860	351390	339880	315630	317400
2-1_GL0118102	120490	86389	118860	135490	150420	179450	157850	143270	159360	147660
2-1_GL0120205	2267600	1505500	1979700	1669000	1870700	1771800	2045300	2014700	1672500	1724400
2-1_GL0121714	159620	NA	185930	236040	155920	NA	203070	NA	NA	190590
2-1_GL0121718	190840	226330	193370	192130	210730	171660	183520	173810	168090	172350
2-1_GL0121721	251210	220770	193400	264610	251540	237540	236360	215740	184300	195340
2-1_GL0121740	70955	NA	168460	NA	NA	46909	100040	71135	NA	56981
2-1_GL0122220	86072	92146	74092	77777	9151.5	71439	68324	74751	69354	83794
2-1_GL0122637	1794200	1883100	1708900	1510500	1568100	1591900	1696000	1554200	1676600	1428300
2-1_GL0122922	167970	183750	229910	270460	267590	264550	295870	355610	263840	294320
2-2_GL0003534	NA	129380	NA	119130	NA	NA	105070	108080	NA	NA
2-2_GL0005186	NA	NA	67965	NA	65563	NA	NA	NA	NA	47487
2-2_GL0005347	110910	251100	216470	179490	183120	64035	146460	71658	149070	165790
2-2_GL0005407	69987	381080	412560	466170	372610	395240	437810	491420	390770	428550
2-2_GL0005909	90621	117080	136580	78745	50015	73377	94940	218260	116230	108440
2-2_GL0006031	104310	90827	99974	NA	92153	102890	102520	NA	NA	NA
22_GL0006093	NA	76173	NA	166590	114300	86881	73697	108460	NA	NA
2-2_GL0007249	537380	592060	NA	458140	531060	443920	475020	425240	357120	513020
22_GL0008170	34111	NA	NA	NA	94452	NA	101150	93704	NA	NA
2-2_GL0009767	NA	9167.7	10016	8884.7	9241.6	10807	11089	20143	17061	18342
2-2_GL0015544	118170	198350	252670	254590	NA	236420	177240	197990	220120	205160
2-2_GL0017765	296620	298840	276190	260560	264730	253450	267810	259460	266810	252180
2-2_GL0020629	159850	175780	164400	159090	161680	173740	165900	164200	185680	176030
2-2_GL0024037	160210	151310	158700	174800	169410	163140	169160	157680	181920	168550
2-2_GL0026240	15884	18876	25602	NA	NA	5800.9	NA	NA	12640	19154
2-2_GL0028420	85354	105190	143030	NA	78209	76668	NA	NA	160940	NA
2-2_GL0029466	226180	224160	209770	210310	194180	212330	215350	222280	208080	223840
2-2_GL0030376	548130	533330	539250	507330	494420	521840	504170	506730	505690	521110
2-2_GL0032163	56723	40524	55746	57048	60948	52667	38466	41842	46122	51783
2-2_GL0034688	81968	336730	490240	379430	439400	418720	402950	379560	460270	417270
2-2_GL0038528	952330	758320	164250	893620	740820	760350	761540	794140	656070	564730
2-2_GL0040077	24086	28810	24534	19499	22389	26630	24660	26754	26291	34522
2-2_GL0043249	391180	396520	349280	369650	332990	351870	384920	337540	372390	393700
2-2_GL0043407	NA	NA	NA	NA	91285	NA	90620	NA	92409	NA
2-2_GL0045471	NA	52844	48002	51214	51534	NA	NA	47897	NA	NA
2-2_GL0046102	313090	328620	313550	331720	329510	319210	314550	317100	281700	307140
2-2_GL0049769	120690	19181	51270	190320	116440	43085	159370	208330	146320	358550
22_GL0051420	371850	406950	315990	414960	296400	371360	329080	370000	340930	335590
2-2_GL0052474	259020	215680	227440	241490	209260	242840	184300	200510	211650	130330
2-2_GL0055485	128130	109510	NA	101100	100200	116040	NA	114160	124410	107430
2-2_GL0056571	2021200	1942500	2186300	2062000	2118200	2524300	2045000	2085200	2174600	2429300
2-2_GL0058270	397240	167180	NA	149950	279860	250740	271790	261780	299330	224670
2-2_GL0058857	130800	88739	132390	97750	97818	93369	94374	89694	88185	81196
2-2_GL0059731	988590	1022500	981130	933440	927340	851580	791410	806620	823720	845350
2-2_GL0060930	41335	41244	39706	40090	31499	49844	44001	48752	52619	35919
2-2_GL0060974	20053	NA	20950	27017	28733	28359	27197	NA	27241	40092
2-2_GL0063768	40521	55403	85993	52072	55611	66098	64193	73822	68930	69335
2-2_GL0064056	173820	193230	170750	158260	140150	204940	166810	229750	227440	326890
2-2_GL0067024	79174	85880	67973	72355	75057	79561	80941	NA	69608	67837
22_GL0067222;22_GL0013754	163910	210140	150300	160370	176680	121880	196280	166350	193990	183470
2-2_GL0067371	3776.1	NA	NA	NA	121730	230540	109140	151480	235280	104240
2-2_GL0069709	32158	NA	28789	NA	20950	NA	NA	15239	25195	NA
2-2_GL0070583	124060	174220	90253	87342	74551	21498	105790	37517	75289	94798
2-2_GL0073397	100020	125280	54217	91853	75758	213290	219740	149050	197960	154110
2-2_GL0075503	NA	NA	NA	NA	33033	NA	NA	3633	3867	NA
22_GL0076169	70583	24992	58902	52398	51978	49983	63173	55925	53088	43793
22_GL0076717	137710	167620	156340	158150	157650	137320	156730	156930	157710	168620
2-2_GL0080396;2-1_GL0103287	295660	251360	259530	241500	251930	233530	229820	221300	245270	239850
22_GL0080670;Group2-3A_GL0128796	235270	225540	297840	205030	237530	286710	263240	263190	263790	322540
2-2_GL0082034	59457	55808	53161	59436	60153	60261	62275	57479	57480	62834
2-2_GL0082283;8-1_GL0020931	52598	50399	56840	43608	44365	46853	55613	44962	50312	52568
2-2_GL0084486	52375	86117	5133.8	50832	79984	94498	NA	97355	8692.9	63472
2-2_GL0085154	49884	40134	63783	48394	6873.3	35483	45756	28612	38385	47955
2-2_GL0087128	34501	57501	NA	83104	75174	74862	55855	79673	82169	73455
2-2_GL0089540;14_GL0090066;S-Fe12_GL0043079	NA	NA	172720	NA	178660	247550	280830	NA	376370	417310
2-2_GL0089776	35633	65811	87700	53926	13564	NA	54417	394590	NA	NA
2-2_GL0092099;8-2_GL0064155	618920	686210	623050	551200	589340	532820	553910	573590	540820	449670
2-2_GL0093294	346440	368380	317370	349260	315550	348430	322890	344820	343480	375570
2-2_GL0094996	496730	233370	NA	73776	83299	NA	9378.3	441690	NA	NA
2-2_GL0095571	24296	29314	NA	NA	23148	NA	29896	12581	40953	33542
2-2_GL0095802	28062	34843	37646	24233	15376	NA	46387	32999	27939	31723
2-2_GL0104289;1-2_GL0087925	45194	44445	NA	90470	100280	85976	74023	72155	65014	78029
2-2_GL0104486	71659	24069	72260	107610	94820	99267	67725	83707	80003	122310
2-2_GL0105122	85163	80745	NA	120930	147560	121300	140060	134760	138570	88013
2-2_GL0106331;2-8_GL0071310	349900	383430	421070	620470	599790	NA	630940	544420	594880	512530
2-2_GL0106600	190410	199710	185790	182630	169500	159270	161940	165300	178930	157250
2-2_GL0107122	360190	429510	64229	353540	NA	293440	353490	322240	298510	349540
2-2_GL0107972	76126	71968	87298	84483	66265	74135	62119	68105	55788	53336
2-2_GL0109379	76227	86476	71651	82480	88691	80328	82981	87623	78590	88167
2-2_GL0111604	359720	362900	364440	335590	364560	404630	366970	329360	337650	335510
2-2_GL0112127	NA	26053	27474	NA	NA	39402	98576	74794	71415	93969
2-2_GL0114153	142790	214870	314230	275420	224440	273660	167200	324660	459130	332780
2-2_GL0119454	447880	419550	414840	421100	448180	420720	426270	412480	411440	392240
2-2_GL0119514;S-Fe12_GL0145635;S-Fe20_GL0023976;8-3_GL0121760	122310	99508	111900	120150	113720	104330	112280	114990	103100	104360
2-2_GL0121285;MC-6-5_GL0019016	69068	15231	51056	60241	79898	69894	66926	75321	71684	150220
2-2_GL0125109;7-5_GL0112823;4-1_GL0023024;8-2_GL0064431	103210	88698	90754	93730	83478	82007	72116	103980	65893	86204
2-2_GL0125744	85324	92990	97082	76542	82311	77605	78545	96321	77385	76531
2-2_GL0125755	62520	NA	75014	70440	NA	90180	75812	67864	79103	66977
2-2_GL0129596	225590	210710	213410	209470	71287	200030	181400	183010	193730	194620
2-2_GL0130846	83034	124660	134090	135260	164600	117700	245420	98790	180620	162730
2-2_GL0131392	72869	75376	66032	71108	64723	73588	77991	71933	76833	73407
2-2_GL0132299;1A-dyr4-07_GL0001069;Group2-6A_GL0110434	131500	NA	48536	138040	10015	122140	98972	80219	114760	134860
2-2_GL0133451	128730	61602	115100	57762	93387	75991	77320	55701	86717	80868
2-2_GL0133472	85473	31859	76078	59818	NA	79886	53461	54259	82824	NA
2-2_GL0136084	192260	245860	239160	210720	246420	269970	254830	181790	281490	269810
2-2_GL0137308	92157	120770	NA	NA	52698	103550	56793	98105	109440	115870
2-2_GL0140121	68639	62917	69444	85253	82851	67355	74158	72026	63068	74419
2-2_GL0140340;7-5_GL0027765	107170	98576	90112	216560	102110	100650	117740	95495	110340	45576
2-2_GL0142401	194090	228120	218540	209260	204160	203620	222990	214970	232340	244830
2-2_GL0142405	38598	39832	50018	44805	48092	37947	50038	42217	39449	37274
2-2_GL0143234;8-2_GL0104287;7-5_GL0193070;3-5_GL0014921	547400	619290	567900	562440	525530	563150	579290	562550	516690	513150
2-2_GL0143285	175060	162100	78144	NA	76619	8686.8	NA	NA	75568	NA
2-2_GL0145679	123760	126510	78458	102540	124960	103510	77782	82694	89048	101910
2-2_GL0146624	327180	290610	309130	232360	264740	301130	297970	304220	312800	265650
2-2_GL0150569	117410	125580	116430	49882	81328	96757	86562	101760	67918	98115
2-2_GL0151691	426390	388930	369820	16951	351740	362130	413470	339060	381610	471240
2-2_GL0154178	1088900	1092100	1140900	1167300	1158500	1145700	1165800	1126700	1127100	1132200
2-2_GL0154188	178150	159160	172050	179130	188400	187850	181740	192920	192250	188350
2-2_GL0154559	58939	23045	51202	78275	92278	110760	106820	132060	112400	131590
2-2_GL0154687	155280	196230	197840	209820	179520	171710	162570	164700	180420	192430
2-2_GL0155297	162700	112790	105690	144160	317350	171180	187370	205550	168750	216300
2-3_GL0000308	122180	188750	255400	213600	217620	383670	304540	324570	342800	411310
2-3_GL0000311	299790	236750	218990	299190	111950	293520	336380	286830	293000	317490
2-3_GL0000992	712650	683900	700510	692420	681540	678500	664590	686200	675690	692820
23_GL0001561	194080	280590	190260	86147	175510	NA	87739	176260	202260	91650
2-3_GL0002271	618930	603130	542240	565750	496850	479510	518470	498840	482010	494190
2-3_GL0002371	108630	67189	62003	60014	77493	64425	66266	49804	61456	43015
2-3_GL0002598	11000	16368	NA	62046	NA	19814	18489	NA	NA	NA
2-3_GL0002730	131930	133340	133850	123520	118420	131560	133300	133790	134380	123520
2-3_GL0002950	262520	242790	283570	302130	298580	316890	308800	295140	294680	301740
23_GL0003280	251230	NA	119990	NA	NA	NA	234220	NA	NA	223220
2-3_GL0004506	117800	107860	99572	123670	105050	89008	101210	66300	119650	102430
2-3_GL0004569	108080	127360	121170	107100	117930	109680	109960	120140	123900	115130
2-3_GL0004577	59290	71781	64084	51421	49004	64197	70609	73439	73847	83945
2-3_GL0004587	3292800	3161500	3310900	3418400	3449100	3478000	3359200	3467900	3303600	3471500
2-3_GL0004747;G1-1A_GL0052611;S-Fe12_GL0145311	214230	255060	291440	269030	306920	313240	260020	349930	330440	327830
2-3_GL0004765	123020	118990	145490	153620	143570	157030	180650	145480	162110	187410
2-3_GL0004781	253170	263480	234010	242280	231320	238590	242080	239020	252260	246430
2-3_GL0008280	252510	260900	242170	242490	240620	248990	240640	245120	243030	244790
2-3_GL0009984	574710	578370	534690	499860	454720	482250	537410	463170	430790	464460
2-3_GL0009989	171140	161140	77016	53585	58155	30327	59332	NA	53308	55680
2-3_GL0010267	778290	714660	781310	822510	815500	778070	816290	781340	766080	830200
2-3_GL0011118;Group2-6A_GL0035610;1-2_GL0053410;Group2-6A_GL0107982;11_GL0070423;11_GL0015307;MC-6-2_GL0032219;S-Fe17_GL0114278;Group2-6A_GL0116707;2A-dyr14-07_GL0040025;26_GL0087337;26_GL0139638;20_GL0054158;20_GL0031919;1A-dyr4-07_GL0045295;1A-dyr2-07_GL0001240;11_GL0045958;10_GL0033891;MH-0-5_GL0107403	533970	455230	430670	382700	411460	403880	406650	461260	403320	489790
2-3_GL0011339	3920400	3562100	3484400	3501800	3218400	335370	3051600	3016800	1995900	1997400
2-3_GL0012633;10_GL0040351	393470	313870	373780	330290	359610	398030	337450	335780	406610	305020
2-3_GL0012641;G1-3A_GL0030227;S-Fe12_GL0083533	104850	116230	94330	71315	37819	66529	NA	80977	72000	NA
2-3_GL0014793;S-Fe12_GL0187612	532090	545900	727460	883830	873470	776670	937070	940530	905890	868450
2-3_GL0015512	1326700	1301600	1434900	1389400	1400100	1537000	1578700	1292000	1418600	1479800
2-3_GL0015861	212130	154520	127560	172650	136180	128800	164780	117660	87230	90353
23_GL0017106	121160	106120	127260	72982	77448	111050	76241	104100	90896	112540
23_GL0019583	96794	118150	112570	98880	96776	104640	92546	99263	101270	99479
2-3_GL0019987	235230	NA	NA	NA	NA	195550	126540	150350	NA	199400
23_GL0020560	627060	591020	492960	504440	492060	461410	486690	482510	488580	509990
2-3_GL0028462	883410	657490	701560	882380	826880	844490	799090	794180	798190	832270
2-3_GL0029383	85651	60097	52107	89648	75650	82395	114050	93474	70395	80473
2-3_GL0029391	1467400	1453900	1344700	1368600	1325800	1251200	1243500	1175200	1255900	1169400
2-3_GL0029399	669680	525450	710780	751230	686840	725670	680640	667550	636990	726800
2-3_GL0030380	106330	82510	113010	80056	59301	66457	NA	117340	94905	116650
2-3_GL0031991	64194	68741	61651	68948	53097	40849	54619	57603	64411	44344
23_GL0032619;MH-6-5_GL0005655	48045	50317	56444	55454	50022	52822	54640	NA	64047	65901
23_GL0033011;Group2-8A_GL0020817	206130	173940	196680	219680	191560	228300	225520	241430	228620	254870
2-3_GL0035301	335710	411430	629860	696020	717730	681920	688430	658220	688460	683840
2-3_GL0037931	341560	362620	365430	365640	339890	351840	363860	373040	379030	366230
23_GL0039889	189660	150750	35737	185140	201540	221320	80034	208610	242360	200680
2-3_GL0040955	28731	35158	30934	23067	31725	26205	33350	NA	NA	NA
2-3_GL0040988	49437	63920	53367	46881	67927	24584	56100	44031	51043	68983
23_GL0041303;S-Fe4_GL0109099	292300	234630	178970	NA	168440	162640	192450	224850	252620	182170
2-3_GL0042236	880750	1482000	1428200	1793200	1712700	1347900	1785400	1647600	1740700	1849200
2-3_GL0047515	33374	19601	51330	26706	49647	42544	51859	38390	56616	71670
2-3_GL0047516	865740	793620	977740	1040000	1064900	922460	1067700	1050500	967820	1006700
2-3_GL0047974;7-8_GL0150723;G1-1A_GL0106621	269770	308240	277470	248430	220280	272050	259850	270390	252950	264910
2-3_GL0047992	336640	312450	265920	275630	281170	230280	235040	229320	229110	223720
2-3_GL0048165	195920	187820	180350	192270	203460	174510	198520	179770	160660	181560
2-3_GL0050515	38289	450600	390540	340760	318690	384190	376870	303970	NA	454600
2-3_GL0050614	154700	173970	131260	149810	150440	171230	154440	173790	138310	184760
2-3_GL0053153	33791	24635	34005	36317	32351	37066	30999	36838	30649	31720
23_GL0053589	71586	72904	73404	82884	82228	81269	80057	74284	82383	84161
23_GL0054631	195800	192840	182730	181630	184060	189580	120970	161630	161460	184800
2-3_GL0055997	308200	298820	314140	314410	328520	300690	290110	285250	314490	308340
23_GL0056999;S-Fe2_GL0068028;Group2-7A_GL0015842	406860	424890	338440	363420	405180	331710	350140	380990	440440	405280
2-3_GL0059436	224970	242150	183210	246640	207930	202510	198550	199220	234620	138200
2-3_GL0060241	79445	88098	70998	71749	68561	60947	56802	71693	50772	64721
2-3_GL0062045;G1-3A_GL0137293	637740	589180	623740	647370	662270	624570	629670	621780	613470	641100
2-3_GL0062049	NA	238630	302690	297150	216390	17700	271420	277190	197030	250330
2-3_GL0062059;2-1_GL0043783	332130	302780	315770	289300	320740	306480	310870	292630	332640	317820
2-3_GL0062071	6040300	5759200	5492300	5658300	5222100	5217400	5415800	5206300	5402400	5800200
2-3_GL0062072;49_GL0077775	3930000	3682400	3376100	3718400	3517300	3136200	3539200	3059600	3457300	3698600
2-3_GL0063079	NA	652860	NA	986270	1065000	1015200	1299300	967880	976590	1194000
2-3_GL0064605;4-2_GL0120044;G1-1A_GL0088866;6-1_GL0028538;MH-6-3_GL0082285;2-2_GL0053873;Group2-8A_GL0128462;1-1_GL0142365;34_GL0007329;MC-0-1_GL0053639;4-1_GL0005770;7-1_GL0066484;Group2-5A_GL0014163;6-2_GL0015050;G1-8A_GL0101798;G1-5A_GL0034119;S-Fe8_GL0105141;S-Fe20_GL0189587;4-8_GL0089667;14_GL0026443;1-1_GL0052409;7-6_GL0107477	366780	236620	102390	136280	88038	123560	118350	179990	141370	41035
2-3_GL0065530	238450	NA	283810	279850	NA	87827	NA	NA	290690	341120
2-3_GL0065534	297250	326170	334470	321560	334830	307450	299390	328300	285920	317060
23_GL0066357	73220	112390	35527	86136	102030	74129	86403	71778	63584	NA
23_GL0067149	87781	99228	73726	102280	NA	NA	78338	NA	NA	91993
2-3_GL0067669	242200	250810	179370	110370	148020	240170	248870	274250	23165	168780
2-3_GL0068909;S-Fe12_GL0204307	615410	695510	729150	107490	602940	690450	647040	853530	645650	917490
2-3_GL0071040	396920	89575	568340	274080	534520	507860	320270	487690	195320	377200
23_GL0071614	106180	9690.8	130910	126130	75005	125300	119690	114820	58626	104260
23_GL0073074	846080	992250	886160	996750	1100900	986150	936810	984560	890950	983300
2-3_GL0073322	56447	58152	79449	67245	80942	47078	88866	98399	51713	150580
23_GL0074568	38386	NA	40462	54038	47494	NA	49305	37576	44974	NA
2-3_GL0075820	474420	544440	423190	513380	507670	471100	475100	441740	460880	515710
2-3_GL0075850;G1-1A_GL0025260	217370	247390	234860	217070	200050	199010	212590	198030	188180	186800
2-3_GL0077122;S-Fe12_GL0207643	111480	178040	100990	127980	163270	56060	171710	161240	230870	66881
23_GL0079503	NA	NA	341220	307870	301210	338540	296480	NA	NA	307750
2-3_GL0080940	1245800	1278600	1186900	1167800	1088800	1154200	1097000	1082500	1104100	1050000
2-3_GL0080941	7579500	7246000	7129400	6548400	6707000	6614800	6375400	6961200	6669400	6461400
23_GL0083604	345380	325720	370290	341700	358560	366660	386630	310950	260910	348410
2-3_GL0084480	215400	211510	215840	229910	222640	221170	208630	255940	208430	233680
2-3_GL0084511	180830	180450	172300	168990	139610	151210	164340	159820	150410	34661
2-3_GL0084512	233830	228440	193340	212550	220830	193370	207000	213380	216150	191830
2-3_GL0084513	237140	185360	162380	NA	102540	184840	197630	205430	173030	167840
2-3_GL0085873;6-2_GL0043237	11292000	10929000	11308000	10917000	11193000	12327000	11676000	12024000	12805000	12584000
2-3_GL0086048;4-2_GL0030521;6-5_GL0022316;4-2_GL0090090;6-5_GL0045676;G1-2A_GL0118566;11_GL0011560;MC-6-2_GL0089037;G1-5A_GL0126681	122740	115080	121570	113050	106230	134720	130660	115330	117090	137320
2-3_GL0086483;Group2-1A_GL0019927	206550	263370	238800	153670	306390	126980	284620	250930	207180	233600
2-3_GL0086488	35541	40958	32726	34422	34063	42898	32567	32022	31264	25907
2-3_GL0086806	130640	179760	121310	129420	NA	75885	119000	NA	62485	175210
2-3_GL0088585;4-3_GL0052164	656330	533840	487290	493340	495550	544520	498840	439940	529030	577990
2-3_GL0089029	462720	437170	409650	411150	428580	416730	437990	438620	473620	449610
2-3_GL0089030	22748	26174	116100	62084	172450	68075	101180	87513	178290	117960
2-3_GL0091868	2033400	2104900	1928400	1861800	1816000	1803100	1848400	1801400	1760000	1806600
2-3_GL0091874	64188	61630	99471	49765	NA	NA	NA	NA	53433	NA
2-3_GL0091942	124550	86920	107840	101090	149060	138730	105740	151120	109370	118710
23_GL0093713	174890	205570	192820	228420	176900	200500	222470	221200	188250	205280
2-3_GL0093863	106530	113200	110950	115760	119140	114750	113290	100000	111050	108150
2-3_GL0094047	NA	114950	159260	144960	102090	NA	NA	NA	NA	125790
23_GL0095675	140570	93027	152690	83052	171210	123120	149480	130970	131780	130760
23_GL0095676	127870	119300	102100	109460	119510	123770	127910	86748	84654	129220
2-3_GL0096810;2-5_GL0077426;G1-5A_GL0074341;S-Fe12_GL0123865	1285100	1314400	1206100	1245800	1156000	1174500	1160200	1195600	1197500	1246600
2-3_GL0096811	1042800	1081800	1037100	1008100	1024700	1071900	1037900	1050500	1049700	1059900
2-3_GL0096830	173690	195730	187050	165250	157410	164960	157310	158900	175340	138550
2-3_GL0096832	329650	264770	273080	292430	242010	282730	278940	273860	318770	285920
2-3_GL0096836	41074	50603	27223	46319	30889	361980	29156	31913	63256	41937
2-3_GL0096847;6-6_GL0128668	115690	123900	153440	139810	140270	147990	154960	241670	219320	192200
23_GL0097013	267020	259880	320600	316100	349910	321680	334290	333440	343530	376600
2-3_GL0097161	126900	142810	105510	89080	70272	63479	91306	87750	94188	75835
2-3_GL0098550	17480	35459	NA	12954	12286	19234	20169	22333	21849	22552
2-3_GL0099670	152910	154150	150070	156560	153360	159890	149420	155160	135080	143920
2-3_GL0100389;Group2-7A_GL0020466;G1-5A_GL0036793;2-5_GL0069973	111760	92014	97084	119130	124260	122510	92218	72942	72135	106660
2-3_GL0101637;1-1_GL0056201	152990	71938	98631	77643	103210	156810	113540	105960	121050	114760
2-3_GL0102173	1130300	1139000	941670	904560	804950	711850	670450	706410	703370	692160
2-3_GL0102205	55437	100170	3716	198710	381980	78794	80030	60705	128890	235000
2-3_GL0102645	54402	66240	53423	57490	52023	49392	53636	53497	53897	48222
2-3_GL0103103	231250	195770	194090	199160	231970	240270	235560	252640	244720	269690
2-3_GL0105795;G1-1A_GL0097279;S-Fe12_GL0051758	794070	746960	847330	822730	676260	868970	848230	798400	777030	908910
2-3_GL0105804	873930	811720	818970	802280	780430	794800	782210	780610	765880	763180
23_GL0109063	97060	95875	77325	49864	27845	NA	68114	NA	77789	15599
23_GL0115185	NA	30198	NA	41929	NA	35964	42903	39699	33604	34785
23_GL0115225	NA	1714.4	558570	431140	NA	NA	677600	NA	NA	401890
23_GL0125801	56361	166080	186880	177980	155690	182900	187180	203170	196650	68497
23_GL0127816	49396	98107	120880	84701	92509	82175	82822	15297	96418	122530
23_GL0128052	15638	NA	37652	NA	56871	NA	63282	NA	NA	NA
23_GL0130307	44616	46812	48419	53029	47256	61566	55579	54118	48739	54503
23_GL0131357	211370	182950	204590	204940	201940	143740	184170	180180	189150	185010
23_GL0133425	68774	NA	59971	55504	24354	NA	54266	NA	NA	NA
23_GL0134681;14_GL0065856;MC-6-4_GL0043020;MC-6-4_GL0072895;MH-0-3_GL0047526;40_GL0061738;MC-0-3_GL0078037;MH-6-5_GL0072195;MC-6-1_GL0016835;S-Fe3_GL0001824	148920	135880	123750	150700	137180	139380	121480	143730	136510	123990
23_GL0135535;G1-5A_GL0047237;26_GL0103359;20_GL0025324;41_GL0015768	104880	89946	95751	95687	91298	91452	107500	101760	NA	78161
23_GL0137035	504280	554300	545320	565330	567300	240250	477040	491070	451960	518070
23_GL0140512	176570	247010	184970	200590	270660	196640	197970	218960	202120	261550
23_GL0143133;MH-0-5_GL0059286;38_GL0090539;Group2-2A_GL0081919;MH-6-4_GL0046500;MH-6-3_GL0008355	429030	406510	417550	440670	433530	432810	423140	401100	381200	397230
23_GL0148044	133860	174690	165570	166230	153170	187590	173560	183720	199330	230330
2-4_GL0001971	286660	308050	266570	259380	256090	271970	272010	266810	273230	295830
2-4_GL0003329	84588	27398	53628	58157	68748	NA	71153	53051	48692	56498
2-4_GL0007561	94304	NA	77505	82534	NA	86160	99311	76622	76368	107720
2-4_GL0026221;S-Fe6_GL0148689	133420	117700	98315	95921	95999	108540	84842	84034	82314	85378
2-4_GL0037109	23992	23407	24963	21011	26568	50039	49426	65423	59211	12910
2-4_GL0042546	158380	146350	137270	137910	139710	125790	128170	118510	124920	127480
2-4_GL0045295;5-2_GL0019173	1120400	804180	802570	1122000	669520	1566700	1039200	1143800	1602000	840580
2-4_GL0048544;Group2-8A_GL0217785	159640	115450	155130	193050	171210	185020	178240	206490	261040	194570
2-4_GL0049274	59975	70443	81900	90573	66093	75349	65910	90613	NA	66890
2-4_GL0056650	219050	149420	192360	163390	158870	165570	158190	150910	184080	171980
2-4_GL0057128	279420	270700	214490	255350	268490	152050	162870	192270	195780	188340
2-4_GL0063036	492070	497500	472950	464160	505620	536230	459560	355370	467740	408090
2-4_GL0073295	68390	93996	133500	61125	106610	160900	28803	177070	77587	NA
2-4_GL0077639	79641	79509	83956	75920	69365	58997	34228	49313	55338	33248
2-4_GL0090286	63894	NA	54519	51185	NA	NA	57876	64728	49622	14364
2-4_GL0098628	412150	321450	381860	346640	431270	381500	322230	252860	392160	395330
2-4_GL0098862	1437800	1492600	1377000	1429200	1420300	1361800	1331100	1390100	1368900	1304600
2-5_GL0001157;5-3_GL0020605	335600	316270	312400	278780	262020	285380	269050	277630	257530	264300
2-5_GL0002629	2525400	2725400	2480900	2854600	3077200	2474400	2401100	2379400	2098600	2402300
2-5_GL0003928	3794100	3645400	3602200	3452000	3396500	3487900	3359300	3419100	3406500	3511800
2-5_GL0004327	86321	76480	71399	96471	130190	95657	92418	93119	85053	134210
2-5_GL0004989	50337	49377	50884	NA	55343	NA	47217	56774	61896	71227
2-5_GL0005064	701230	654570	761270	768690	734390	683440	683220	683210	636460	650970
2-5_GL0007106	217590	225080	303410	249250	245890	NA	227470	217640	149420	NA
2-5_GL0008595	253460	226240	223860	226790	262650	241720	249000	231060	236430	248940
2-5_GL0012957;2-1_GL0024447;1-1_GL0143695;S-Fe12_GL0071643	881910	759770	812100	847480	835370	835460	846070	823600	791550	869970
25_GL0015924	86734	84086	60855	106920	78464	67034	92239	101560	101070	100190
2-5_GL0016798	338040	362630	268930	292260	267100	296110	302160	302570	335660	276870
2-5_GL0019211;Group2-8A_GL0132537;Group2-4A_GL0146347	NA	123890	108640	117580	91273	103160	97725	153390	86472	144420
2-5_GL0020291;Group2-4A_GL0127595	37701	37079	41237	46391	41995	39362	43558	43569	42667	41007
2-5_GL0023856	615860	536040	617560	552770	603150	636510	610930	591250	622170	662500
2-5_GL0024453	123270	196080	182820	31809	184070	172020	142210	136860	300230	175860
25_GL0025122	NA	NA	5968.5	NA	4183.4	4244	5063.7	NA	8243.4	NA
2-5_GL0025479	126180	137700	134580	124870	152460	NA	153670	119640	180800	99545
2-5_GL0025491;5-3_GL0001319	40301	37087	40266	36729	32420	44243	44217	39604	40471	46104
2-5_GL0025492	72972	20357	84701	103240	175930	135580	121170	107100	113190	86863
2-5_GL0028038	66212	12633	NA	55372	NA	136970	3761.8	126590	51733	126180
2-5_GL0029984	2090400	1819100	1911000	1952900	1967300	1972300	2019800	2188600	2098700	2090100
2-5_GL0030686;2-1_GL0067160	115450	125510	112600	106840	108230	103650	102220	106080	99295	96941
2-5_GL0030726	50562	48108	49694	47718	46357	45249	49490	46587	46671	49319
2-5_GL0030947;4-1_GL0008701	314410	207820	343420	340470	341680	341470	329320	317420	316090	316170
25_GL0031160;MC-6-1_GL0028222;MC-0-1_GL0025025	94214	70913	133070	85531	96766	91541	59315	73079	100920	116280
2-5_GL0033775	376000	410790	420650	408650	418970	428800	462700	420910	421790	458030
2-5_GL0034294	188430	199460	154290	209650	185550	202750	220050	220030	212910	212780
2-5_GL0035363	53579	79786	77543	66573	79224	52965	63709	64675	55005	54102
2-5_GL0042266	226850	308100	214870	204400	223150	213480	214530	239870	235840	213430
2-5_GL0045979	28848	60276	88827	88944	127140	104670	89023	94323	88490	93729
2-5_GL0046998;2-2_GL0136936;8-1_GL0005412	175260	119180	140410	130890	148790	148780	125820	149190	183870	164840
2-5_GL0047504	35745	NA	NA	NA	NA	98137	39888	20805	NA	NA
2-5_GL0052916	48116	38177	39079	43132	43985	53392	47669	55384	50026	61338
2-5_GL0055301	NA	NA	42777	NA	NA	78498	3113.9	81927	63441	84329
2-5_GL0056919	90318	59307	34198	65275	150760	124990	283960	224960	137170	213600
2-5_GL0056978	NA	NA	236090	283340	NA	125980	58478	128200	NA	268440
2-5_GL0058344;S-Fe10_GL0069698	149600	187720	124020	117530	138000	139980	123520	138620	132670	145760
2-5_GL0058789	71702	70615	66752	67409	58001	NA	66062	63407	67215	60233
2-5_GL0058808	119200	86003	87236	72214	87548	95106	90833	80890	90828	71742
2-5_GL0059022	146760	115700	124020	105690	85832	118430	133660	131090	117840	116700
2-5_GL0059214	44593	26721	37667	39638	37098	44287	44679	44192	47912	58395
2-5_GL0059397	74202	85655	50081	59526	59790	58922	32398	55212	63045	57695
2-5_GL0063554	56571	83332	95556	56942	45544	65348	84921	56559	56418	54235
2-5_GL0068667	354070	359470	374220	377680	407120	397580	406780	410160	426020	387840
2-5_GL0069320;G1-5A_GL0071230;Group2-1A_GL0112425	420890	358960	437990	400780	333190	390570	399540	399100	383530	406410
2-5_GL0072625;2-1_GL0102394	540070	512460	546860	721300	580660	496730	455460	490480	388990	672670
2-5_GL0073403	83762	86343	108030	116750	96635	98309	82428	84858	82433	89291
2-5_GL0077425	230270	246220	235880	189180	256760	194960	162030	151510	175620	227820
2-5_GL0078356	184100	188040	156600	161910	141940	152190	135720	129320	136050	126550
25_GL0092132	135260	128150	136500	93384	96715	130050	138740	141570	122410	132760
25_GL0094012	210810	261170	NA	226020	183250	233820	223480	NA	200640	212250
25_GL0095065	503800	639920	549030	587480	582350	540670	NA	518480	514220	491840
26_GL0002628	49179	55210	40856	NA	NA	34423	68833	51817	57955	54153
26_GL0006440;G1-7A_GL0009592;20_GL0130548	638280	440880	449020	NA	419840	NA	NA	NA	NA	424090
26_GL0016074;2-7_GL0069624;4-7_GL0098121	103130	113230	111180	94574	95420	NA	NA	90568	NA	103930
2-6_GL0036140;14_GL0036195;MH-6-2_GL0055662;MH-6-1_GL0080575	55351	53839	61592	46043	50154	45586	47829	47027	50055	59736
26_GL0042131;7-3_GL0070741;20_GL0129546;Group2-4A_GL0141247	458880	483780	393570	329640	401150	481750	418610	423860	371700	227120
26_GL0043098;26_GL0020165;17_GL0075803;17_GL0107546;20_GL0007727	560090	514460	487100	533260	493110	488460	463000	487220	479850	485880
26_GL0044737	NA	NA	NA	23573	NA	NA	25025	NA	19837	19963
2-6_GL0048575	366630	358200	312610	343470	283740	268300	270020	268680	246230	288110
2-6_GL0048576	109710	162760	110960	62640	95946	87774	93060	97155	84261	88579
2-6_GL0057703	90668	77176	82835	99709	76952	63618	86987	66477	82359	86329
26_GL0060734	435230	114300	363850	230980	320640	349670	443950	342840	417730	417650
2-6_GL0064820	475300	643640	512920	561180	510720	356520	455790	435580	572240	582940
2-6_GL0065005	84846	82358	70305	67440	62929	85256	99181	99245	80635	95921
26_GL0065335;52_GL0063841	149230	171440	158380	184170	162900	144440	145930	146710	142120	135540
26_GL0069263;2_GL0053633;5-2_GL0094680	80689	89769	84595	75554	61849	104710	78398	93756	81410	79577
26_GL0069817	285880	274800	305730	271840	290850	320570	310550	310740	274160	309290
2-6_GL0069942	216590	291940	323910	173920	307470	370150	277930	277080	274540	30308
2-6_GL0070304	312660	237380	271630	326210	343750	378080	296810	294770	296940	305440
2-6_GL0080553	NA	NA	NA	NA	NA	29477	NA	NA	24070	27884
26_GL0084018	269720	304540	242600	233180	254470	211740	227460	246320	184500	219340
26_GL0100420;20_GL0128582;G1-8A_GL0109097;17_GL0000326	4176000	4511800	4408000	4070000	3880400	3975900	4047900	3666200	3974200	3950700
26_GL0100613;Group2-7A_GL0026504;Group2-3A_GL0113560;1-1_GL0114307;8-3_GL0058401	447640	479850	415620	371350	365930	427240	345350	367600	363700	389000
26_GL0106558;Group2-3A_GL0058381;Group2-1A_GL0117450	65781	76690	77233	95138	100300	58011	66928	29647	95405	93933
26_GL0111020;1-8_GL0092769;1A-dyr1-07_GL0015701;S-Fe17_GL0047782	984370	1072800	910420	898340	887580	841430	837950	819570	860370	778070
26_GL0113070	14031	NA	16000	15970	14981	18472	NA	18650	NA	30232
26_GL0127226	206320	204160	174730	179180	189260	204190	182960	192260	181820	207540
26_GL0143567;2-7_GL0060370	108280	104600	112500	93855	114810	117280	103240	120140	101860	91407
2-7_GL0020742	88268	82800	93675	113130	108390	115260	100710	94844	85412	98440
2-7_GL0024198;7-2_GL0023884;MH-6-5_GL0145002	212900	286720	253680	279300	257220	264040	256240	271580	245440	275590
2-7_GL0044195	208030	258320	195940	230130	132480	201910	265230	162050	196070	198450
2-7_GL0046144;7-1_GL0009388	2006300	1808100	1817100	1937600	2079400	1859100	1717000	1910100	1773900	1917000
2-7_GL0062923	76161	114390	128620	141570	107860	131220	137710	149830	130870	120670
2-7_GL0084190	392020	757810	690410	742020	872040	706380	775040	730880	703490	780940
2-7_GL0087533	1081500	1091400	1014700	986790	1010800	1015900	996290	963700	993750	1041000
2-7_GL0091106;MC-6-3_GL0079455	169530	89909	93360	111480	86375	71399	73211	144520	88919	120800
2-7_GL0095336	147630	15874	NA	124060	NA	36169	13544	345290	277490	32046
2-7_GL0100757	219080	264330	252990	272470	264690	285270	306200	233700	248410	265070
28_GL0001933	103700	NA	NA	97067	103940	NA	63113	90448	79880	78170
2-8_GL0003248	129380	145860	119550	114970	113410	126790	82367	109960	65859	109210
2-8_GL0005311	805120	759340	809400	829630	880680	820760	813940	844850	804110	816080
2-8_GL0008141	8447.8	8391.9	12820	8028.8	14222	16008	16372	17034	18514	11074
2-8_GL0013593	177750	238110	263250	189960	119170	243380	221520	223280	208830	229800
28_GL0014389	11598	11114	NA	13955	13938	13059	14295	14074	12326	NA
2-8_GL0020511	177930	172370	122750	147990	133680	135750	222930	153870	161850	97012
28_GL0024951	46116	58112	36710	46588	47881	62780	42838	39953	44572	49555
28_GL0030161	182690	182590	172310	174140	156760	166240	183490	162090	155850	142670
28_GL0033599	11926	12981	NA	13348	12533	14159	12216	14996	NA	14931
2-8_GL0037621	6025200	5594000	5535500	4908500	4887100	5345800	4913500	4234600	4887800	4860400
28_GL0037869	169920	216780	176470	155020	164850	192080	182570	229940	183130	222530
28_GL0042998	185170	158600	228700	282950	203490	225180	242340	53510	209570	251440
28_GL0044456	88385	55427	77713	68708	70407	83134	77419	72402	77420	78924
28_GL0045891;6-2_GL0006001	65337	43139	51867	51750	52917	35581	54013	47452	36531	41303
2-8_GL0055221	472310	627650	745590	698740	993960	560340	597010	576140	540650	491000
2-8_GL0056240	323220	233870	309300	304280	282830	279800	299500	255810	258230	306060
2-8_GL0059894	75101	91290	62651	58114	94826	66981	64464	67820	59318	63789
2-8_GL0060042	162340	177700	146920	156540	220810	162710	105230	206630	169680	204930
28_GL0064281	9495.6	12478	13472	10353	11314	10777	12786	16686	13993	15484
28_GL0066492	355590	369160	343430	311580	313210	321940	314220	303780	299960	315300
2-8_GL0070180	15245	14132	17578	16805	18824	22641	20541	24926	20594	21307
2-8_GL0071465	124620	141580	91887	108010	121380	96248	127610	100310	88509	100160
28_GL0071609	174880	151890	163440	171090	180760	130130	139020	145960	131290	136090
2-8_GL0074235	69423	NA	95652	NA	58434	48331	57835	67320	65353	NA
2-8_GL0075141;5-3_GL0113930	338910	138250	296430	357400	240520	335120	272970	331680	178240	288440
2-8_GL0077784	NA	123500	89775	105720	34282	127110	126280	133990	139460	130460
2-8_GL0078136	118370	136060	101050	94916	146680	93848	101880	100560	91722	51208
28_GL0079362;G1-1A_GL0104470;G1-1A_GL0038055	45397	41453	43299	41979	39852	NA	40280	40119	37767	39538
2-8_GL0085455	43928	229560	NA	NA	NA	NA	NA	169180	NA	NA
2-8_GL0092069;8-3_GL0100693	5946.9	144930	126360	179810	3695.7	118340	286580	NA	2155.6	NA
28_GL0093835;23_GL0106468;8-1_GL0069124;17_GL0114641;Group2-3A_GL0077775	123460	124040	132380	134250	131050	139000	137060	117190	143810	131270
2-8_GL0099161	NA	NA	NA	198910	274560	NA	NA	273940	250600	235740
2-8_GL0100524	314800	317560	345090	269470	298780	286700	285930	303760	283530	289250
2-8_GL0100526	582010	776000	557890	604540	529830	589930	787970	604360	949090	606020
2-8_GL0103441	450700	448830	364510	395410	407330	352880	347480	401150	403840	396040
2-8_GL0109886	103670	235440	98121	235580	164280	150450	276880	372000	293100	316780
28_GL0113309	127030	119060	147990	112270	161180	146890	165680	147670	159710	164270
29_GL0009860;G1-5A_GL0072912;32_GL0041053	19255	169020	83995	272990	255900	279620	283090	246270	238520	220310
29_GL0024392;23_GL0107253	21343	24591	25131	23774	27777	16851	17634	43409	24452	NA
29_GL0030986	136220	156990	139680	143930	159700	124690	NA	162760	147120	NA
29_GL0059851	168440	192190	167870	179340	180430	206310	198830	165580	163840	153220
29_GL0062908	261740	234970	198130	200860	178650	178470	171530	175780	163040	184540
29_GL0067888	117010	210360	143920	98731	98090	123140	94482	103410	49404	64334
29_GL0102344	118880	113940	107190	97408	103280	99324	95342	82884	72530	NA
29_GL0111795	86525	101720	86153	NA	118110	124460	NA	117000	298690	113700
29_GL0132058;17_GL0137863;G1-4A_GL0018942;20_GL0172709;17_GL0002945;S-Fe3_GL0213757;8_GL0055484	321160	244050	323590	252890	304400	348430	398520	400940	340120	373330
2A-dyr13-07_GL0016088	10077000	493880	13029000	13144000	7380500	15485000	14218000	15231000	157490	906700
2A-dyr13-07_GL0019058;1-1_GL0005528;34_GL0075940	70310	260870	292460	233120	248950	235440	212670	236980	296720	NA
2A-dyr13-07_GL0037479;1A-dyr2-07_GL0000594	81275	75388	69957	71055	78893	94802	106760	88790	86826	133190
2A-dyr14-06_GL0023083;Group2-2A_GL0063381;S-Fe6_GL0035382	235830	184100	175190	182130	175870	198920	181630	179740	207780	190390
2A-dyr14-06_GL0037258	1361700	1357200	1326700	1257700	1329200	1321000	1340700	1383200	1367100	1359500
2A-dyr14-06_GL0054569	51612	49766	58621	55561	80378	67685	53183	62824	81349	67413
2A-dyr14-06_GL0056636	119340	69555	NA	NA	92153	NA	NA	NA	98973	NA
2A-dyr14-06_GL0056642	60430	41930	43787	48451	52698	46174	58003	67245	90796	NA
2A-dyr14-06_GL0063007	241690	170010	288500	220450	139590	227900	291190	244150	216730	256660
2A-dyr14-06_GL0065220	234210	285980	255150	278310	212350	240310	256010	227320	193520	183230
2A-dyr14-07_GL0007669	122570	NA	89827	92317	NA	NA	107220	84344	81894	119010
2A-dyr14-07_GL0021171;11_GL0068944	118980	NA	51330	NA	2831.6	59908	NA	41160	95337	NA
2A-dyr14-07_GL0034700;11_GL0025984;10_GL0060834;4-8_GL0028287	121960	207550	202230	181240	NA	176600	NA	NA	137570	40922
2A-dyr14-07_GL0036596	152650	156730	159780	150040	142000	152610	150760	148030	149860	160470
2A-dyr14-07_GL0037894	244970	240070	252680	254900	269880	279140	283010	257810	265160	253480
2A-dyr14-07_GL0059822;11_GL0052466;3-3_GL0102717;S-Fe20_GL0019594;1A-dyr4-07_GL0102649;4-7_GL0146230;10_GL0070277;2-5_GL0018695	818320	780860	714040	692670	664520	760980	735960	728800	597070	681040
2A-dyr14-07_GL0061336	102080	108300	98134	NA	90912	69302	86107	70207	81983	75195
2A-dyr14-07_GL0067822	70779	69423	163450	93576	84941	44874	76255	NA	90047	88308
2A-dyr16-06_GL0000485;1A-dyr4-07_GL0028986	NA	NA	NA	40707	NA	NA	NA	NA	NA	49164
2A-dyr16-06_GL0003807;3B-dyr36-06_GL0025271	47590	61022	74797	NA	93242	84655	85111	83651	92225	90652
2A-dyr16-06_GL0005924;1A-dyr4-07_GL0071917;S-Fe9_GL0056616;11_GL0112834	NA	NA	191450	141780	146660	179830	184180	197790	269040	284030
2A-dyr16-06_GL0009609	NA	86106	153900	67736	40078	116260	NA	82278	NA	126940
2A-dyr16-06_GL0018814	206760	306340	255770	261060	135050	74146	239560	292860	224400	241450
2A-dyr16-06_GL0019187	415830	381580	350350	373910	343630	380020	369330	330830	372360	346140
2A-dyr16-06_GL0020786	42630	40852	43839	50016	41070	51678	53524	37367	42446	52203
2A-dyr16-06_GL0021101	116480	165730	NA	NA	92677	92033	85331	91323	88781	99088
2A-dyr16-06_GL0031830;1A-dyr2-07_GL0052714;5-6_GL0004580;4-3_GL0089082;MC-6-2_GL0174343;4-2_GL0016401	950900	893670	876790	1003300	1047800	865890	886600	834810	677570	996230
2A-dyr16-06_GL0051101	849640	759370	888600	910240	844350	779670	862180	846490	835830	850500
2A-dyr16-06_GL0061657	105780	18916	128250	129900	143460	119250	139450	95813	104250	129090
2A-dyr16-07_GL0000620	132580	69747	126660	85320	118520	NA	91574	119410	NA	111170
2A-dyr16-07_GL0005642	130540	97965	191480	165390	185940	242030	201430	256580	122130	196870
2A-dyr16-07_GL0017169	371430	363140	313260	328850	338640	326430	309910	323950	316180	333370
2A-dyr16-07_GL0031078	567030	451290	439100	376700	494380	431090	41770	290380	334590	352340
2A-dyr16-07_GL0034220	92687	196810	150590	NA	166630	218860	94219	130170	NA	NA
2A-dyr16-07_GL0038020	77987	80179	NA	221310	95136	101590	87767	151500	113120	27796
2A-dyr16-07_GL0039382	97818	111520	110570	113220	119860	106320	104580	96713	102080	118000
2A-dyr16-07_GL0047024	NA	NA	1030000	NA	NA	NA	NA	NA	530550	NA
2A-dyr16-07_GL0056933	NA	NA	NA	NA	NA	NA	72783	52512	NA	52285
2A-dyr16-07_GL0078050	109410	115130	74079	93445	94907	101080	89159	105170	94199	93658
2A-dyr16-07_GL0080542	66735	NA	NA	NA	64992	NA	NA	60979	46465	61840
2A-dyr16-07_GL0094086	75793	150990	211050	104080	120070	105520	19668	10174	81902	49199
2A-dyr16-07_GL0096765	NA	106670	83241	66878	106740	115400	102960	77550	98569	82843
2B-dyr19-06_GL0001958	686910	765900	519260	520810	442290	492640	433150	450190	448560	431040
2B-dyr19-06_GL0030623;2A-dyr16-06_GL0039105	328180	306710	425090	350520	305820	293760	382250	525700	434200	518440
2B-dyr19-06_GL0048335	NA	49884	55408	42252	39642	48073	50538	58265	41212	63769
2B-dyr23-07_GL0007711	382990	306490	322430	291760	304970	315990	347880	314640	329910	296380
2B-dyr23-07_GL0020466	27347	28315	35244	22077	23921	19911	24211	34008	23676	22989
2B-dyr23-07_GL0021524;Group2-3A_GL0102583	182960	234910	179540	218440	196330	210800	199600	196690	180640	200940
2B-dyr23-07_GL0049983	207440	193400	130320	148960	148210	191040	176610	172970	164780	164700
2B-dyr24-06_GL0065236	361970	354170	327180	360150	308780	342380	335210	327480	308900	296300
2B-dyr24-07_GL0027755;7-8_GL0013564	85949	94101	63774	99708	NA	74721	68507	53745	NA	93013
2B-dyr24-07_GL0030910	100960	98018	94320	84517	84344	76693	64343	65961	57233	69708
3-1_GL0006170	166670	116460	103020	112470	172200	149990	161250	152850	138010	153390
3-1_GL0007228	21986	26348	22546	23370	33827	62414	30359	29639	41995	31478
3-1_GL0008128	292320	390950	377840	404330	371460	380120	366390	347420	325390	401410
3-1_GL0009239	409230	NA	NA	NA	110940	424980	NA	NA	NA	436470
31_GL0014376	381920	394130	340590	333870	307280	298130	306160	288280	303740	283360
3-1_GL0018865	87059	92371	37253	69616	40637	25787	30260	17622	47933	39087
3-1_GL0020327	190050	NA	NA	141920	125090	240370	NA	62950	158800	NA
31_GL0024892	212800	189460	220550	156810	163990	147870	160330	193680	191090	147740
3-1_GL0028327	72566	76621	82975	105500	75814	NA	104450	124000	82732	NA
31_GL0034271	440720	542880	381630	352780	364400	360050	355300	353470	355920	343270
31_GL0035487;20_GL0057763;S-Fe12_GL0180330;G1-8A_GL0054307;G1-1A_GL0056564;2-5_GL0022411;2-3_GL0093870;2-1_GL0057421;2-5_GL0061391	182210	124890	239890	156220	266290	242860	261820	256280	NA	NA
3-1_GL0036989	1326400	1409500	1357600	1296800	1287600	1227400	1184400	1269800	1130200	1134400
3-1_GL0038768	122050	NA	113540	124620	NA	141460	93230	NA	156940	119610
31_GL0039026	762570	712190	631600	758740	673830	640880	677310	549140	592880	601940
31_GL0041092	313890	338480	325610	167020	247020	256160	300670	254940	333020	287800
3-1_GL0044984	197570	195560	183230	191940	170270	183980	179480	203540	169350	181220
31_GL0045860	86844	73188	73566	63046	73487	82477	142880	76198	NA	80682
3-1_GL0046625	183830	195130	149580	217330	208820	173650	183350	206350	163310	171700
3-1_GL0049920	891360	805840	824860	802660	810460	783990	731590	693680	696660	677690
3-1_GL0054518	772280	716290	826270	737870	834470	816140	776930	744620	773510	784640
31_GL0054965;10_GL0039976	NA	NA	NA	NA	56966	63760	NA	48133	NA	NA
31_GL0060417;G1-3A_GL0048518;G1-8A_GL0002875	NA	NA	NA	NA	NA	NA	36738	NA	34691	NA
3-1_GL0063415	554790	538910	532230	542620	538200	478170	527520	506090	482940	510350
3-1_GL0065586	311280	337750	299620	298650	295120	300890	299200	268480	267960	286610
3-1_GL0067242	1359800	1489000	1284400	1205000	1224300	1244300	1236800	1215000	1323300	1199300
3-1_GL0071292;11_GL0028482	37660	39408	39157	37611	36532	44630	35011	49828	41627	27195
3-1_GL0071434;3-3_GL0007857	147120	120070	142710	130320	141370	124450	126220	124080	122160	61606
3-1_GL0072055;4-2_GL0113063;MH-6-5_GL0021921;1A-dyr2-07_GL0077421;Group2-8A_GL0050777;8-7_GL0014700;10_GL0070280;S-Fe2_GL0142648;S-Fe12_GL0211469;S-Fe12_GL0083535;6-2_GL0039163;5-2_GL0102416;4-7_GL0146227;4-5_GL0005229;3-1_GL0029024;2-5_GL0051204;2-4_GL0024138;2-3_GL0015891;2-3_GL0012643;2-1_GL0109057;2-1_GL0087626;2-1_GL0009420;19_GL0071373;17_GL0039226;1-1_GL0013129;2-2_GL0125568;1A-dyr1-07_GL0…	NA	120530	12126	149820	10455	NA	11224	133340	7848.9	163510
31_GL0073464	945170	896780	919620	922820	880050	880200	854650	842380	881180	844590
31_GL0076600;Group2-1A_GL0072296;2-1_GL0018594;2-1_GL0002664	230430	224700	231030	220880	213360	214450	229740	234430	234340	248230
3-1_GL0077016;2-2_GL0125589	15653	22818	25422	34057	31800	24211	19809	21318	NA	35079
3-1_GL0077017	44847	72540	48606	62159	78133	56635	62834	57258	63473	79840
3-1_GL0081548	50695	73682	27808	41410	86687	38711	39990	37369	95626	43789
3-1_GL0086169	7261500	8255900	7862200	7931400	7649600	8078100	7743500	7437100	7255900	7865400
3-1_GL0091210	226350	212650	180810	235350	186020	252100	241530	239780	240960	253800
31_GL0091700	2004100	2112800	1816900	1618300	1395800	1556000	1521900	1607300	1686200	1412100
3-1_GL0093950	1244600	1325900	1154800	1198500	1107900	1170300	1071300	1059600	1061900	1095400
3-1_GL0094038	83568	89471	NA	77707	NA	71030	76905	67725	68882	67533
3-1_GL0095819	58034	29307	65289	NA	NA	55645	36754	38808	51679	59991
3-1_GL0097688	310090	237400	257140	238740	243410	276330	268670	298220	263500	316380
3-1_GL0099603;7-5_GL0058316	245860	225850	243670	246950	240160	239920	244700	195880	214100	248880
3-2_GL0004470	745380	527390	586050	645830	651960	620050	546590	551080	561100	488940
3-2_GL0013557	77117	45275	NA	42844	122920	NA	79156	NA	NA	NA
3-2_GL0019842	3716300	3753700	3898200	3810900	3660600	3891700	3412600	3627700	3893400	3865000
3-2_GL0020306	64916	43289	72086	NA	65308	70586	83227	80501	65707	77069
32_GL0021838	93901	54596	109010	96866	117050	100760	115640	124950	99191	111940
3-2_GL0026078	52613	42645	50223	50218	51131	41646	33964	40458	31222	34378
3-2_GL0036211	58659	83163	139400	69535	127610	126810	174590	171660	147170	177320
3-2_GL0044377;Group2-2A_GL0046340	65323	37499	57861	32991	26475	69635	68809	64065	72889	80695
32_GL0056532	NA	NA	NA	47400	47330	40807	41280	43690	NA	56306
3-2_GL0062694	NA	212710	NA	184990	NA	184760	192000	159430	175220	200450
32_GL0064470;S-Fe7_GL0289205;23_GL0050213;S-Fe11_GL0050783;G1-5A_GL0211919	36589	50270	45404	50529	55631	52054	51643	48375	49393	56905
3-2_GL0068898	791480	736060	659170	705940	883350	839220	796500	747510	719420	749760
32_GL0088143	NA	NA	NA	115090	113650	NA	98910	90321	97766	102040
32_GL0104477	22874	19343	18147	21138	20364	25703	NA	25862	22389	22727
32_GL0111881	235780	273400	204370	176690	211450	255510	210370	210460	275770	194560
32_GL0111907;7-8_GL0096984;Group2-8A_GL0135212;Group2-7A_GL0144783	38270	34911	44003	42493	42284	47332	36702	43527	40130	48883
32_GL0135097	66550	45501	NA	75100	NA	55435	65080	61960	69435	52443
3-3_GL0011641	424800	492620	407490	438450	412270	468230	435100	460910	467670	450310
3-3_GL0015631	209830	170310	175120	164070	146060	141390	128470	128360	NA	135740
3-3_GL0026476;Group2-8A_GL0176957;1A-dyr4-07_GL0112723;S-Fe8_GL0168562	104280	81247	40439	82283	82887	83828	66172	55813	94498	56939
3-3_GL0033464	274070	223770	260730	234710	259490	247900	252360	211250	200180	263560
3-3_GL0039961	688580	672390	650250	639460	617820	586580	577940	606100	577080	663260
3-3_GL0049024	90888	102740	91712	94700	83414	65302	87223	97327	91028	93392
3-3_GL0079932	109300	119310	117610	114250	73836	98654	98825	108240	113380	93019
3-3_GL0086922;10_GL0080426;8-3_GL0099290;5-7_GL0102755;35_GL0104729;2A-dyr14-07_GL0061143	123230	83202	129110	150850	154100	166040	156650	150600	190570	180100
3-3_GL0088496	286440	290550	241620	225560	259800	240620	256520	235050	224280	252230
3-3_GL0100994;8-1_GL0076341	135860	98240	213610	314570	191940	222710	268640	303390	240410	295370
34_GL0005795;1-1_GL0139943	90086	88876	91388	89948	84759	83603	90408	91039	86891	92522
34_GL0007339;22_GL0108699	198340	158130	133820	153340	149890	159450	130820	147120	233060	164540
34_GL0009955;7_GL0001552	898440	469420	839060	897380	766030	779860	707590	948310	966780	755170
3-4_GL0014520;2-1_GL0093171	1699800	1770700	1800500	1795900	1698000	1906700	1755000	1867900	1639100	1747200
34_GL0024705	636460	629550	568820	534640	519470	523160	509750	532550	481190	518890
3-4_GL0028422	138140	68316	211500	203340	192830	138050	133310	251820	231150	200010
34_GL0029000;1-1_GL0026921	65938	75053	NA	180140	NA	170960	152970	186040	NA	176530
3-4_GL0031004	236930	293310	252180	235250	245010	235420	230790	235260	218340	256750
34_GL0037103	169750	153180	174070	164710	165050	169010	160040	147780	175370	149240
3-4_GL0039792;MC-6-2_GL0076891;7-1_GL0084647;4-3_GL0066886;2-2_GL0119181	221750	290550	226980	234120	264530	217210	244370	272380	216140	234590
3-4_GL0041400;2-2_GL0102145	134160	126860	63972	67436	124820	123480	126680	110200	119340	114470
34_GL0041794;1-1_GL0022565	217290	236040	227750	166870	215650	210700	279560	220920	214350	233390
34_GL0042756;40_GL0026669	239110	204560	218470	243870	210080	207300	231190	225910	191690	217010
3-4_GL0045321	38568	40013	34755	35656	35771	36493	46704	52696	40907	53698
3-4_GL0048088	174380	162510	143260	157280	154720	158160	158830	155970	158460	160840
34_GL0066279;1A-dyr1-07_GL0037352;1-1_GL0068022;1-1_GL0046574;G1-5A_GL0075504;6-1_GL0078460;28_GL0077658	NA	15814	NA	NA	639970	116730	NA	22081	NA	NA
34_GL0079617;1-1_GL0108993;1A-dyr4-07_GL0048717;G1-3A_GL0067553	1634900	1772500	1642600	1993900	1934900	1682400	1819700	1800500	1813800	2071800
34_GL0080700;1-1_GL0124400	80846	93539	87784	83958	82601	81879	87653	73267	80017	76611
35_GL0002274	105300	81007	83955	119060	126420	NA	NA	NA	NA	NA
3-5_GL0002294	2887600	2370100	2577500	2812700	2742300	2630300	2632900	2370600	2500500	2484100
3-5_GL0005950	NA	NA	78502	83971	79056	NA	81410	NA	NA	NA
3-5_GL0018240	196950	151760	178400	137200	167060	181680	188980	159290	235520	191620
3-5_GL0021064	406150	497320	402020	386190	382270	424810	405870	399670	398990	406730
3-5_GL0022718	62956	37455	142610	123820	146890	131380	137700	116560	126870	145490
3-5_GL0023986;7-5_GL0063140;1A-dyr1-07_GL0020514	2955000	2831100	2864200	3170500	3133800	3082400	3022200	2920400	3029200	3142000
3-5_GL0026479	1380900	1398400	1383500	1350000	1152400	1220300	1307400	1126700	1256400	1217100
3-5_GL0028913	191040	156170	146180	154300	138980	138100	168750	160150	140920	169420
35_GL0029654	186620	136590	39187	96821	82917	172170	119410	97825	148880	66104
3-5_GL0032295	374070	444120	357850	444480	402940	441730	410070	412810	395720	398110
3-5_GL0033094	95999	76982	82497	103540	132460	62610	85239	86933	112390	NA
35_GL0035715	65243	64366	78520	67146	50025	52624	54469	79826	69852	53382
35_GL0042497	71936	13668	130460	170270	163460	81008	87539	109050	155500	104990
3-5_GL0046555	66210	72197	89274	63472	48841	45959	63552	63125	51077	62903
3-5_GL0047540;Group2-8A_GL0004165	138430	156410	147830	124230	142070	131750	194220	138700	133460	164920
3-5_GL0047916	3425400	2870600	3054400	2920700	2959800	2882800	2841900	2707800	2977200	2867200
3-5_GL0048232	209270	117110	320010	248990	236040	236930	265940	249690	254990	238400
3-5_GL0050568	674020	855190	744020	706570	741340	676090	939770	726240	727680	644980
35_GL0053560;S-Fe20_GL0098308;20_GL0037236	3304600	2733700	2947000	2931800	2639300	2481700	2508600	2791300	2442000	2853100
35_GL0053842	57230	437170	261840	272540	191410	184030	169970	158890	156110	264410
3-5_GL0056574	1110900	1147800	1004800	1052400	996150	958810	1024000	963410	943100	1027500
3-5_GL0058228	611250	483290	424490	431910	506410	443950	394920	451630	444520	438990
3-5_GL0058721	354190	405870	377390	313830	348920	351360	332130	346350	255620	370780
3-5_GL0064362;7-5_GL0001861	169390	167550	154080	155710	154660	164470	137450	156860	151890	137410
3-5_GL0064703	38126	42804	185360	72327	13124	33861	10994	71579	193930	121910
3-5_GL0067786;2_GL0015902	1034200	992840	1060300	906490	985170	962400	969550	892550	881560	863240
3-5_GL0068802;1-2_GL0124123	61299	62620	47448	52817	47303	56211	51127	53277	54025	53170
3-5_GL0069860	186790	240300	184640	185730	201600	170670	166500	156580	164020	173360
3-5_GL0070222	87251	NA	50109	NA	61840	54881	67388	43005	NA	NA
3-5_GL0070956	85384	127500	80612	164040	83331	117700	NA	36565	20428	NA
35_GL0073425;Group2-3A_GL0023112;G1-5A_GL0099661	105790	110370	117840	108650	111360	118900	123120	105560	106360	122540
3-5_GL0075414	35741	30503	50215	57750	47875	52433	54595	51996	24315	41383
3-5_GL0078498	174170	112490	NA	154950	78716	NA	117620	111100	130100	180740
3-5_GL0081488	330710	321560	343190	328620	325090	312170	328390	350460	305640	304730
3-5_GL0082187	69497	86651	54019	65118	57934	66241	69115	86275	80887	81775
35_GL0082428;Group2-3A_GL0214811	128820	144040	150300	155180	152360	179230	167770	153620	154210	155540
35_GL0082816;11_GL0083465	47331	45082	50043	61669	41814	52969	51543	49899	21877	NA
35_GL0089920	177580	173230	179020	173220	142820	NA	123760	135450	119970	112600
35_GL0091503;29_GL0044239;6-1_GL0092358	152120	133120	95207	181950	179300	155410	170560	165500	223300	166410
35_GL0093169;6-5_GL0112882;S-Fe3_GL0160698;11_GL0128492	NA	79108	62777	NA	NA	NA	74821	76130	61547	78492
35_GL0097538	125920	127700	131020	143190	111050	94141	105600	103320	105170	88270
3-5_GL0101557	9101.9	19386	21463	14864	16029	NA	23874	38438	34740	43616
3-5_GL0105741;6-4_GL0101252	81226	64100	66045	59421	57833	51556	58703	46672	45173	54323
3-5_GL0107671	604470	696080	595420	552930	549210	530060	529160	491920	505210	500330
35_GL0116043	103250	NA	90559	89698	NA	NA	NA	135200	21307	134690
3-5_GL0116372	98818	107200	120080	96233	100780	175210	132140	325510	99725	172400
3-5_GL0118066	42637	40346	46239	52844	NA	50854	42957	46011	34438	34600
3-5_GL0118285	241780	432960	221980	305720	414620	235060	294860	260920	478500	255840
35_GL0118785;5-5_GL0031773	NA	NA	NA	64355	NA	NA	NA	NA	98428	43129
3-5_GL0119887	338680	313500	318210	316080	333600	317600	279520	301680	315300	330610
3-5_GL0120794	365050	399710	407460	387340	393710	397450	372120	382770	348980	366030
3-5_GL0123641	112840	112290	122560	111500	112660	61688	95085	103950	95818	117430
3-5_GL0123684	74960	107290	154690	184830	157610	134620	109440	139470	144010	130710
35_GL0124728	176250	102170	157170	209330	113370	142200	134770	224030	149870	NA
3-5_GL0125912	255060	227080	252590	300160	314400	289860	267900	268470	281970	266700
3-5_GL0126622	189270	268200	263510	327160	320150	299260	306580	241730	499730	385950
35_GL0128063	124690	NA	NA	NA	102020	NA	NA	NA	112050	NA
35_GL0130831	389820	382270	315570	348880	329170	317400	248840	163830	248520	396600
35_GL0136148	1512500	1284500	1244500	1138600	1223000	799040	1240700	971990	434520	948300
35_GL0152348	775910	763560	691220	712200	673190	600640	601920	583980	570610	598910
3-6_GL0004253	52173	64587	42510	51422	NA	54800	64684	NA	NA	66117
3-6_GL0004823	983350	884170	828440	868420	729670	909020	865440	783590	764040	842190
3-6_GL0021313	171520	208950	213980	221320	238780	251810	254030	221480	205370	214520
3-6_GL0025665	377790	407010	381990	364530	375940	379840	403310	404240	401140	397370
3-6_GL0026546;5-5_GL0128182	793860	457300	754180	721830	724090	572760	450030	577140	516740	520330
3-6_GL0039132	60032	47884	41464	41210	32112	NA	63611	66223	60642	64042
3-6_GL0039139;2-2_GL0089536;1A-dyr1-07_GL0015349;1-2_GL0035060;10_GL0059726;4-4_GL0029438	332660	388780	385430	360070	429740	389640	390640	393480	378930	385260
3-6_GL0039144;1-8_GL0064960;7-5_GL0154146;10_GL0059721;7-5_GL0086054;G1-5A_GL0150550;MC-6-2_GL0171757;5-1_GL0073760;2-8_GL0014180;MH-6-5_GL0178834;MH-6-5_GL0094195;MC-6-1_GL0108160;6-2_GL0048196;Group2-8A_GL0004166;G1-1A_GL0058575;2-2_GL0099322	267620	267420	240490	241050	245110	228160	217820	206100	211300	200410
3-6_GL0051335;3-1_GL0012212	115320	91387	83574	98393	106060	101220	132080	92313	95399	94410
3-7_GL0014620	NA	NA	77045	72409	61231	104450	86645	96907	67383	64610
3-7_GL0015565	515870	566010	448520	470450	445980	480990	450040	485090	481680	448260
37_GL0016532	298940	264280	293400	266600	299290	NA	NA	283620	368000	269670
37_GL0018308;S-Fe10_GL0021310;1A-dyr3-06_GL0017534;1A-dyr2-07_GL0034958;11_GL0121982;1_GL0014036;G1-4A_GL0028042;31_GL0008441;10_GL0012095	NA	51458	43158	28223	NA	NA	NA	NA	NA	56053
3-7_GL0021056	192270	135530	112840	128620	128950	141340	142480	278080	127930	62467
3-7_GL0022026	304130	199280	189480	145390	NA	388230	414750	335140	272740	320500
3-7_GL0022344	24057	68036	52649	65743	67021	9358.3	48862	30519	61114	53388
37_GL0028671;MH-6-3_GL0040743;MH-6-5_GL0063819;1-2_GL0030644	114420	251320	195670	192220	193340	190330	197160	173570	194430	180680
3-7_GL0035461	181000	175250	162130	168900	157230	169520	166590	166740	156900	164380
3-7_GL0035829;1-2_GL0071376;S-Fe2_GL0143674;MC-6-5_GL0002422;MC-6-4_GL0091933;Group2-7A_GL0071327;2A-dyr16-07_GL0016158;Group2-4A_GL0053272;MH-6-1_GL0051393;20_GL0052239;S-Fe7_GL0219876;Group2-3A_GL0205236;32_GL0061318;S-Fe20_GL0041016	35031	114110	141380	184820	160700	175150	168990	155830	159010	206740
37_GL0042111	176820	151170	140330	190140	169400	164750	167690	138450	172870	139220
3-7_GL0050744	503630	455850	445140	454100	456220	471790	489330	512530	251300	556320
3-7_GL0055218	229220	196370	194920	166320	190780	205380	187940	191490	190570	183770
37_GL0064322	760120	811200	800340	800740	812990	768940	774290	749810	729950	753380
3-7_GL0065379	72272	NA	NA	NA	NA	70128	52715	56327	NA	62498
3-7_GL0067223	80236	73009	18223	80916	73354	95391	80073	79031	66915	101340
3-7_GL0070275;MH-6-1_GL0118148;8-5_GL0024395;S-Fe2_GL0210641;1-1_GL0034657;MH-6-4_GL0103150;47_GL0080676;MC-0-1_GL0074098;5-3_GL0105134;S-Fe8_GL0008502;8-1_GL0066574;MH-6-4_GL0055511	353120	255960	340900	388850	373030	352640	405740	357600	413970	386490
3-7_GL0070473	700100	661860	595560	565820	577050	634120	615460	661410	625940	672290
3-7_GL0072829;11_GL0059961;10_GL0038119	376280	358900	357370	380660	357830	317110	343300	357860	357260	342210
3-7_GL0079704;5-1_GL0087110	73448	50150	78529	68439	77070	109130	89765	94011	83395	64358
3-7_GL0080749	138610	137460	127520	138810	163610	112420	125500	123360	137960	117370
3-7_GL0081478;11_GL0049046	730990	827050	670460	674540	735730	648830	668020	614820	606080	622260
3-7_GL0081576;3-7_GL0072477	154010	144700	149560	148890	154660	153690	139500	141770	NA	169550
38_GL0014182	92120	125400	74130	44473	51050	76606	89513	86345	93959	126860
38_GL0022899	86077	115340	122090	123390	119800	98861	60090	95118	97087	103250
3-8_GL0027844	13524	252160	222440	360880	410650	451090	320960	364050	296330	416100
38_GL0032027	186850	171190	167200	171210	164170	173640	167590	169060	187410	167690
3-8_GL0040129	71203	95781	82839	68895	84546	78930	87436	99126	80729	80607
3-8_GL0041886;S-Fe20_GL0138630	2672000	2808900	2697900	2412400	2657600	2394300	2275300	1982300	2233600	2217800
3-8_GL0046192;G1-3A_GL0099545;5-3_GL0066451	564120	501310	502520	510160	518710	472820	493870	461970	465500	461720
38_GL0050779	356310	281680	363750	374890	368310	359150	376130	378260	289350	325130
3-8_GL0057539	195660	176300	178510	173960	195740	175610	107730	179330	179120	166640
38_GL0064430;10_GL0001670;5-8_GL0110805	93860	112390	86927	82583	95346	NA	127560	91628	73493	31800
3-8_GL0065092;8-8_GL0007757;Group2-8A_GL0058594	666580	741060	681350	653060	686760	646390	614490	589780	590580	635730
38_GL0070575;20_GL0118797	78448	NA	58083	31675	122360	98879	65274	60586	15146	NA
38_GL0076495	54043	61181	57586	57188	43136	50329	48860	57063	43709	54156
38_GL0079365;1-1_GL0117868	349140	332220	276810	313870	324180	277790	299000	275000	229330	231140
38_GL0096706;1-1_GL0090446;1-1_GL0075236;Group2-8A_GL0054553;G1-5A_GL0186590;1A-dyr1-07_GL0002549	189830	224810	205980	182130	200320	159360	194260	207590	194560	75888
38_GL0102093;1A-dyr3-06_GL0038646	121080	824510	875500	93528	26074	1173800	715600	860840	390440	349530
38_GL0109923;1A-dyr1-07_GL0024711;1-2_GL0086213;Group2-8A_GL0059645;22_GL0041743	593320	NA	521640	479570	439680	379600	NA	514010	443980	463330
38_GL0128261;MH-6-5_GL0125619;7-8_GL0004023;2A-dyr16-07_GL0033426;1-1_GL0120097;32_GL0045417;S-Fe16_GL0037617;MH-6-4_GL0065065;8-3_GL0077504;MH-6-3_GL0113777;S-Fe7_GL0059132;S-Fe16_GL0040496;MC-0-3_GL0014253;MH-6-3_GL0108660;Group2-7A_GL0026428;S-Fe9_GL0281585;1-8_GL0008708;20_GL0013814	84254	144770	142640	168450	148350	179670	160860	141880	103840	149460
3A-dyr30-06_GL0000181	92614	144900	NA	247760	NA	229290	264080	219580	317270	296280
3B-dyr36-06_GL0007023;1A-dyr2-07_GL0060154	89436	92385	109760	107680	120470	152600	97392	92128	133750	119440
3B-dyr36-06_GL0045449	32556	38831	37376	40040	30924	40349	45346	43110	42446	49097
3B-dyr36-06_GL0047558	187440	208390	187700	218040	176150	144540	202750	149290	170360	168820
3B-dyr36-06_GL0048615;G1-5A_GL0170319;6-4_GL0040304;4-3_GL0069261;1-1_GL0053004;14_GL0132258	210310	198770	205120	260900	272110	212380	NA	215760	206970	192760
3B-dyr36-06_GL0053142;2A-dyr16-06_GL0082930;S-Fe8_GL0132106;1A-dyr4-07_GL0110602	6998.1	18276	78889	14770	125420	NA	104900	139900	108730	97620
40_GL0001449;16_GL0064789;1-3_GL0045077	242270	284150	221360	281340	269450	211110	244350	189470	210610	192860
40_GL0004504	36864	170770	150830	144870	151100	143260	42197	44820	48819	47935
40_GL0017458;7-1_GL0071761;1-1_GL0120486	NA	NA	NA	NA	38859	NA	NA	NA	3490	NA
40_GL0036768	197970	247730	35677	303230	530330	328360	325550	10501	231480	114570
40_GL0063238;1-3_GL0093270	51634	NA	51477	61446	46966	64514	52812	51396	71508	NA
40_GL0063975	730820	786310	853130	808390	804700	837560	681920	743250	796050	781830
40_GL0065169	165470	252510	278430	225440	192470	143310	142930	160480	181500	152830
40_GL0077841;37_GL0013375;1-1_GL0111479	246150	220240	NA	189620	147030	280290	259060	174580	172630	242550
40_GL0085157	185700	135600	128900	82035	90723	168510	167500	109460	108330	45695
41_GL0002060	239780	250500	235950	221840	255060	210980	226960	211620	214980	231740
4-1_GL0002628;5-5_GL0026823	180310	111760	194680	182400	200360	311510	176750	358640	151660	176070
4-1_GL0005066	1356500	1376500	1504600	1306000	1374100	1434600	1441300	1420000	1404800	1339400
4-1_GL0006409	63215	85149	73129	85449	97290	109460	87008	84520	NA	84934
4-1_GL0007396	159600	69027	181330	203970	190490	192150	218540	236680	240950	186980
4-1_GL0010800	NA	18524	NA	26745	32974	NA	34479	3887.9	35614	40194
4-1_GL0012071	140780	173440	147270	157920	136730	158160	131070	135300	138640	131500
4-1_GL0012625	167610	178950	163350	146910	158190	188570	170280	121570	187160	163430
4-1_GL0012700	163660	131000	169280	188580	190010	184320	190810	198430	173660	179100
4-1_GL0012890	260470	247430	229850	270330	281180	202250	221180	202740	203780	166030
4-1_GL0012891	600170	536540	594510	630020	616310	651870	649420	651500	699760	684080
4-1_GL0012892	1276200	1462800	1282200	1263000	1222600	1218100	1244700	1167200	1318800	1170000
4-1_GL0012894	345710	287040	232080	320850	281480	305890	331320	447470	336800	352760
4-1_GL0012896	79688	163630	161050	134340	NA	165880	161670	172370	155270	160270
4-1_GL0013292;S-Fe19_GL0006769	91005	96416	109740	103050	138310	128370	113920	118880	136650	138470
4-1_GL0013931	368350	334870	352420	368180	341120	311270	299870	325800	251460	323640
4-1_GL0015438;20_GL0052321;2_GL0075359;S-Fe11_GL0075414;2_GL0044572;4-8_GL0124309;S-Fe20_GL0140296;2-7_GL0071932;4-7_GL0123823	731400	987060	943830	827280	868910	888100	785930	1086300	906420	788850
4-1_GL0015938;7-5_GL0009089	37061	62050	99095	113760	101590	131440	99497	135240	102520	145220
4-1_GL0016136	54333	NA	56022	72525	55258	46444	51867	53811	50933	59579
4-1_GL0016632	156790	178510	163830	161270	169570	169700	172890	183800	159470	149530
4-1_GL0017830	362780	363460	363310	317980	267910	301530	264010	266180	240470	262150
4-1_GL0017831	189960	171080	152220	196360	142150	180230	196700	170360	170390	163980
4-1_GL0019848	226180	321320	318990	342780	379210	342670	351760	372960	384000	431030
4-1_GL0019853	252520	237870	240470	195900	241510	124480	172540	171380	121820	146540
4-1_GL0021590	60304	131400	111690	106580	108610	99528	100270	116770	125720	106060
4-1_GL0022805;7-5_GL0063139	NA	NA	NA	1367800	NA	NA	NA	NA	1067200	NA
4-1_GL0022807	18515	16953	NA	NA	27699	NA	NA	NA	24529	25460
4-1_GL0023018	62954	85557	67096	67629	67464	71181	79495	70418	73310	76498
4-1_GL0023022	146270	144890	135750	121690	112310	88330	120240	137900	99016	94370
4-1_GL0025901;S-Fe19_GL0032168	241530	284730	287860	269500	274140	308820	308340	296850	303780	319710
4-1_GL0026024	219520	17929	222830	56508	157510	146730	140170	113490	36799	9123.9
4-1_GL0026384;7-5_GL0193085	675850	675030	645060	565820	617450	561190	546260	550180	535870	547830
4-1_GL0026388;Group2-2A_GL0057409	171470	148140	152730	150510	161930	147380	141950	142430	140320	161810
4-1_GL0027404	103820	127280	135150	NA	115140	107950	114340	129800	156880	115650
4-1_GL0031018	NA	217770	NA	NA	NA	NA	87657	93698	NA	NA
4-1_GL0032557	392160	241690	417350	404260	449100	411210	381250	365770	367870	474310
4-1_GL0033100	169570	166820	161130	117120	139510	175220	150980	210510	176510	133930
4-1_GL0033101	133610	109520	119380	141080	60376	97128	87260	108000	90934	115240
4-1_GL0033476	62422	104520	NA	169970	39213	253730	122470	128530	98373	120310
4-1_GL0033815	NA	24647	2492.5	39432	34752	29573	13889	44386	42614	52177
4-1_GL0037845	66809	75322	73124	55012	NA	64760	84319	81849	68794	61435
4-1_GL0038203	1411200	1487500	1352600	1399100	1314500	1283200	1302500	1249100	1267600	1276200
4-1_GL0039810	70110	86241	77252	78767	63926	82179	75140	84317	79435	81467
4-1_GL0040689;8-2_GL0067404	174290	175210	158300	166030	162100	162880	154420	165870	162300	141980
4-1_GL0042251	337850	324640	316870	283970	308280	313020	373320	353260	327880	394270
4-1_GL0042650	NA	45856	48016	32518	42881	30275	31595	NA	NA	29634
4-1_GL0043646	456790	12144	410660	394980	376400	422120	434550	348250	329420	420300
4-1_GL0043965	96655	173530	137920	174420	160480	183830	188410	160870	258900	218320
4-1_GL0044060	102690	86860	NA	62522	63049	65916	48745	69442	61777	70936
4-1_GL0044489	50635	58004	64222	68395	68513	53741	66450	45422	45427	35771
4-1_GL0045655;7-5_GL0020145;4-2_GL0122448;2-3_GL0100459	260000	150280	269440	284210	238310	214500	377950	270360	317190	210400
4-1_GL0048652	37706	40412	69337	7547.7	34011	72534	95907	4148.3	74029	NA
4-1_GL0052193	202340	264610	329160	341070	389630	380210	379310	389190	386310	398640
4-1_GL0052607	423740	443080	410340	388940	402430	402640	390740	433330	399850	407090
4-1_GL0052696	722940	718970	558990	653100	208600	569290	608530	581660	587840	573770
4-1_GL0052786	103370	19825	82289	76558	77783	88998	85118	90783	81529	104730
4-1_GL0057479	108180	107200	106080	102430	109200	96170	83356	109080	97189	NA
4-1_GL0062056	241440	213690	194660	267500	309070	NA	274730	311410	281340	262300
4-1_GL0062284	402470	390090	374870	390150	387200	403200	383750	400340	397880	393330
4-1_GL0062494	41138	68336	51191	62300	60897	56038	61779	NA	64682	74391
4-1_GL0063821;MC-6-2_GL0056698	40364	45154	NA	35051	NA	43134	42767	37967	39210	NA
4-1_GL0065296	1097300	672600	845070	1108500	826450	796780	620560	587280	281160	526210
4-1_GL0065529	45749	38308	46328	51842	50222	58522	60008	55852	73986	NA
4-1_GL0066340	46327	82961	46164	45880	50105	37311	NA	63004	NA	65656
4-1_GL0068194;6-1_GL0096272;11_GL0096306	200160	133890	NA	NA	207800	173460	186340	176800	217760	229470
4-1_GL0069044	464860	358200	415690	406550	416710	316050	345470	324220	368050	364980
4-1_GL0069166;MC-6-1_GL0066073	93674	148070	85037	105430	86140	92191	83643	98724	104190	92299
4-1_GL0071052;MC-0-3_GL0010275;7-1_GL0006975;2-4_GL0017984	NA	NA	7916.2	NA	NA	NA	155450	60194	61427	59261
4-1_GL0071150	517590	719950	668500	669620	724760	672200	697730	642830	603640	622320
4-1_GL0071382	278240	286750	338530	324430	285880	317350	316130	291740	257080	309690
4-1_GL0072049	312870	304930	272110	266030	246810	247760	258050	253260	254050	260710
4-1_GL0073239	1640900	1753200	1613200	1540600	1402700	1392000	1405600	1291100	1396300	1305300
4-1_GL0073390	130830	134560	132400	106770	104360	130360	124490	130780	122210	152880
4-1_GL0074517	55940	65006	58546	62025	90771	14191	72276	54646	45771	68048
4-1_GL0075275	1132000	1113100	1172500	1154300	1153500	1208700	1207300	1186100	1135000	1191200
4-1_GL0075644	134440	195170	144000	193880	135800	85010	128630	128720	125160	122130
4-1_GL0076714	129660	143490	131630	121640	127920	135070	112200	145080	155390	112110
4-1_GL0078425;G1-1A_GL0119263	65437	NA	115870	94107	101450	NA	88187	107290	109430	118060
4-1_GL0079155	25665	8938.6	NA	NA	NA	NA	58590	NA	52520	NA
4-1_GL0079156	NA	175480	NA	96113	2375	97049	NA	84498	96336	NA
4-1_GL0079284	88027	101050	181680	146060	147320	141110	119540	171250	128580	108780
4-1_GL0079285	212800	211300	187300	219710	186460	198690	190000	206780	258510	214950
4-1_GL0079690	99336	83028	87174	84436	86834	64965	49816	72733	54414	61047
4-1_GL0080461	332620	323140	311210	282640	296590	272470	279050	262810	287120	279560
41_GL0080835;Group2-3A_GL0150810;20_GL0013105	25721	24785	24262	26232	25110	26418	27203	32579	31257	29657
4-1_GL0081681	87113	94052	81469	74384	75237	70189	76719	66352	NA	60181
4-1_GL0082186	NA	NA	447070	417200	454920	NA	NA	435170	NA	460550
4-1_GL0083000	136450	116160	115200	160760	155430	168870	181010	170550	167400	160870
41_GL0096270	347270	503390	293440	NA	348270	251280	314720	280960	282750	291630
4-2_GL0000258;1A-dyr4-07_GL0006518	1334200	1280300	1331100	1295800	1258100	971220	1057400	957260	900960	1016400
4-2_GL0002982	NA	NA	NA	NA	NA	NA	54343	2115.5	55528	NA
4-2_GL0004966	617530	617260	592610	497410	474610	385970	529630	173550	480630	524300
4-2_GL0022358	322450	287680	323760	277390	314340	299490	283900	319220	271350	340690
4-2_GL0030911;G1-3A_GL0119208;2-1_GL0117217	213960	256630	218030	236330	229370	219810	254880	241280	140290	249990
4-2_GL0032002	56814	60562	64408	64729	67275	86616	74698	79809	78590	91431
4-2_GL0036651	42489	47497	38369	45961	39124	44133	34886	37835	38781	37285
4-2_GL0037945	55334	63323	69128	77621	61850	95762	91111	66593	65978	64462
4-2_GL0039027	38094	NA	NA	NA	NA	NA	35775	NA	25574	31737
4-2_GL0040157	49934	NA	NA	58732	NA	NA	58865	61629	NA	NA
4-2_GL0043523	147200	113580	NA	120150	157880	NA	NA	167190	116140	153250
4-2_GL0053150	102100	91060	97909	119200	90553	117510	NA	NA	92597	90418
4-2_GL0066375	589290	596880	578740	499000	553740	535050	544620	526380	518340	498120
4-2_GL0067923	149940	99094	115440	115770	171540	132190	121310	116660	101090	99084
4-2_GL0071357	130400	67116	116470	NA	NA	139270	139810	130060	5782.2	146040
4-2_GL0077416	67821	NA	62781	58977	NA	NA	57909	NA	NA	47056
4-2_GL0084019	86742	118010	88704	NA	NA	144490	38863	99452	NA	NA
4-2_GL0084916	NA	44942	NA	NA	40882	68288	13232	83289	NA	NA
4-2_GL0087447;29_GL0062680;35_GL0079983;3-3_GL0101460;G1-5A_GL0118117;6-4_GL0067458;6-2_GL0026137	84681	164120	120050	98352	99316	92795	91130	77383	82683	86467
4-2_GL0090088	683630	462460	573300	515210	542580	513360	496250	541720	422740	329350
4-2_GL0094209	20482	39330	26123	21162	26937	22272	23961	29550	18339	3101.5
4-2_GL0105421	100130	121160	66919	122290	107150	159080	107800	150840	96181	147100
4-2_GL0107015;4-7_GL0091510	31502	36886	62157	67041	75966	81813	58963	42691	66587	57631
4-2_GL0116018	113340	NA	92700	126910	NA	80369	128060	81013	10649	NA
4-2_GL0119024	776440	723380	860900	871260	641130	791430	830640	823850	NA	781570
4-2_GL0119200;S-Fe7_GL0046833;17_GL0028428;Group2-3A_GL0186233;G1-1A_GL0036776;6-5_GL0003901;6-4_GL0022280;4-2_GL0081797;35_GL0057624;6-3_GL0093598;2-2_GL0009733	373000	398840	303050	352130	282810	229630	300090	237180	NA	262500
4-2_GL0122689	50918	79476	49913	47166	48046	42342	39130	48831	51062	26008
4-3_GL0005894	121660	174180	57121	134810	70765	105060	120300	83418	154300	246160
4-3_GL0007345	42406	163910	168950	186040	177510	165140	181840	171360	166010	200110
43_GL0010662;8-1_GL0050203	NA	52635	61604	75622	NA	88409	63225	64525	70816	83918
4-3_GL0015732	526300	548880	543080	537530	532260	503390	522240	518920	493040	545290
4-3_GL0016214;6-3_GL0001206	176970	121540	244480	NA	73360	NA	251820	432950	NA	540890
4-3_GL0016227;S-Fe20_GL0116991	NA	48110	46292	42925	39948	42869	36594	36687	35194	36597
4-3_GL0017430	784170	749390	843610	792130	771460	936440	687960	751460	729070	742550
4-3_GL0023277;3B-dyr36-06_GL0004321;S-Fe8_GL0189024;6-4_GL0066277;1A-dyr5-06_GL0037924	44160	79016	83915	48535	50071	44814	46252	24120	10045	NA
4-3_GL0023577	32047	NA	NA	NA	NA	137590	NA	24344	NA	133660
4-3_GL0025195;4-1_GL0077359	233820	233920	216780	220240	216340	216090	198720	204700	194390	183030
43_GL0025566	155400	220480	172170	139360	147850	79987	145030	152140	124610	198440
43_GL0028121	105840	NA	98083	77155	NA	86423	80107	78710	66629	95952
4-3_GL0030327	147750	119310	147050	46235	121280	73803	108980	134870	118120	NA
4-3_GL0039646;MH-0-5_GL0134704	387020	407620	382540	468410	366890	412140	287140	366680	325050	349220
4-3_GL0042685	70010	87383	74506	60727	NA	65723	63469	61276	66197	56995
[truncated: 3,006 more rows]

## Sheet: DIA-MQ-Protein
Microbiota													Host
Protein IDs	DIA-MQ-1	DIA-MQ-2	DIA-MQ-3	DIA-MQ-4	DIA-MQ-5	DIA-MQ-6	DIA-MQ-7	DIA-MQ-8	DIA-MQ-9	DIA-MQ-10			Protein IDs	DIA-MQ-1	DIA-MQ-2	DIA-MQ-3	DIA-MQ-4	DIA-MQ-5	DIA-MQ-6	DIA-MQ-7	DIA-MQ-8	DIA-MQ-9	DIA-MQ-10
1_GL0004722;MH-0-3_GL0005477;S-Fe2_GL0170894	58539	65137	60160	65663	72951	74337	32468	50634	62822	61479			O08553	NA	NA	8943.1	NA	NA	9039.6	15231	NA	10381	19592
1_GL0041992;2-1_GL0038151;8-5_GL0034441;MC-6-3_GL0014865;MH-6-3_GL0111249;1-2_GL0023035;MH-6-1_GL0088296;S-Fe9_GL0207036;20_GL0172070;S-Fe7_GL0176825;S-Fe20_GL0059594	172620	159020	171140	161480	168690	170320	169160	176740	150220	176080			O08573	10383	9305.5	7781.7	8377.6	5119.6	1386.6	8514.3	10194	9478.7	7698.3
1_GL0043524	97579	79990	78375	115260	47734	54653	98467	87028	70983	112490			O08601	72321	61141	65091	53425	60476	54687	60040	46454	61493	51824
1_GL0100631;G1-4A_GL0019983;14_GL0124354;6-1_GL0062513;S-Fe8_GL0195568;S-Fe6_GL0192230;26_GL0076787;1A-dyr4-07_GL0048160;G1-5A_GL0015696;11_GL0011325;1-2_GL0040405;1-4_GL0084533;1-1_GL0151501;26_GL0097174;2-2_GL0089550;3-2_GL0067552;Group2-3A_GL0028895;6-7_GL0026521;20_GL0175919;11_GL0026527;1-1_GL0124360;2-1_GL0097897;G1-2A_GL0023229;S-Fe20_GL0026058	971730	945910	914890	1056400	1039200	981640	1084600	1090700	1048100	1075300			O08709	460100	478470	479280	485040	483970	501600	499360	478180	478540	503290
1_GL0113163	371250	395430	461420	425220	380470	393600	379220	330010	382660	382430			O08749	925950	758050	747510	707420	877780	831580	870910	855210	814930	877380
10_GL0002188	71832	45060	40859	NA	17931	46318	38612	52756	29954	NA			O08756	NA	25911	40792	39089	6747.7	37352	29975	NA	52767	46767
10_GL0011642;5-8_GL0142127;S-Fe10_GL0072623	272660	236940	256730	270530	269600	284110	299740	276630	304850	303210			O08795	101240	86105	90996	64212	67431	55463	95227	100490	83128	98182
10_GL0012297	98447	87240	102710	102820	102800	111740	108250	99837	116490	107220			O08807	117900	112540	152590	128390	126260	110510	133760	116450	28851	63910
10_GL0015619	38138	19749	9599.6	112390	35334	28283	NA	51891	70906	NA			O08848	747020	770790	848060	663940	681860	854140	673390	704320	712290	843460
10_GL0017432;2-6_GL0065188;2-2_GL0125591	12515	11119	10244	11968	12036	12282	12662	13149	12798	11967			O08992	122170	136670	102850	94545	97297	133380	110630	115650	107860	102320
10_GL0022027	613050	514670	614650	583570	545740	599110	555760	602790	619160	627490			O09037	486410	469530	483290	448860	410850	434230	423990	439250	448210	425660
10_GL0022779	35181	36389	33211	34405	33848	34853	29590	30149	26081	39906			O09049	7767800	7905000	7813500	8080100	8050700	8110000	7918600	8031200	7837600	8011100
10_GL0022788	309770	282460	302660	293530	309750	317830	332120	379270	316320	352620			O09061	182760	220140	177850	233250	214860	210350	200930	176370	205170	141130
10_GL0023967	19786	13209	18163	14234	13588	12610	13037	7168.6	7465.1	4388.9			O09131	62341	43856	27711	NA	61778	50898	21379	53048	47235	38551
10_GL0025698	611240	611750	589300	630400	620510	621080	628890	598410	582300	502550			O09159	181230	199080	204860	236020	194680	223790	206580	150980	183180	150430
10_GL0030674	767350	696960	724650	734770	752760	762110	700880	710570	700400	795700			O35054	47468	35390	47574	54006	58313	52969	54208	56793	64680	55725
10_GL0030675	101830	90239	58817	120200	120300	92498	89953	107600	117920	85806			O35129	35536	35199	34692	31558	33056	37098	31546	32137	32988	37718
10_GL0030677	141020	155270	144150	165050	135750	143290	151390	126730	147230	133650			O35350	37444	36698	43296	38612	26870	43867	42367	NA	31457	17978
10_GL0030713	222770	186520	149180	213680	145080	124540	103410	142900	118430	133460			O35594	125330	10441	63759	156380	168690	207330	138560	87479	101720	155990
10_GL0040330	294710	228400	283870	76419	18011	349950	208780	276660	259510	271090			O35598	335230	217970	233930	239510	321010	324060	291770	358500	350360	324160
10_GL0040778	27762	93488	NA	19416	102270	32739	33066	129290	94308	106240			O35639	103020	107310	108940	109640	88157	117270	102730	107190	95676	108820
10_GL0042587	33519	26919	41694	39797	36143	35793	34962	NA	148360	34088			O35684	54586	68405	66469	58347	67210	65723	65405	50356	61604	53551
10_GL0048655	468790	137080	489530	316440	357250	125590	179100	166880	206370	148680			O54990	82262	68610	64612	71223	71350	70641	74226	79856	63571	58679
10_GL0054899	63630	66522	62074	64232	66047	55004	62674	54950	57653	61885			O55111	37898	26582	36122	36758	35996	38868	35850	41177	39330	32887
10_GL0059712	NA	NA	1238.2	1280.7	22.73	245.73	256.43	NA	26.206	NA			O55135	NA	19418	19379	18610	NA	16152	30859	23711	NA	44899
10_GL0063323	51326	NA	12066	NA	NA	96643	99846	87887	NA	49581			O55234	9658	13605	10991	9884.1	10326	10762	10822	7458.1	12716	12427
10_GL0063930	220230	223660	254590	222370	213580	227330	234400	229650	240010	237820			O70370	609280	582410	579990	607980	577710	636850	591460	534170	561000	626830
10_GL0065599	48192	53719	37354	57277	67882	59059	51924	88910	97980	142210			O70435	94205	69841	91105	102080	99508	99175	70643	79168	82802	83892
10_GL0065662;20_GL0014278;S-Fe10_GL0095560;S-Fe10_GL0082892;MC-6-1_GL0006653;MH-0-4_GL0022652;31_GL0038728;G1-1A_GL0076432;1B-dyr11-07_GL0006915;1A-dyr1-07_GL0007946;14_GL0134396;MC-0-1_GL0020550;MC-0-3_GL0013230;1-1_GL0141637;3-1_GL0019714;G1-1A_GL0026950;G1-1A_GL0052859;MH-6-2_GL0115474;MC-0-1_GL0037345	44347	39402	43397	38182	43572	36491	34915	163220	38119	44101			O70456	43710	41825	43447	20549	20802	36415	27952	44018	59260	61154
10_GL0066865;MC-6-5_GL0012643;MC-6-2_GL0022966;MC-0-1_GL0089057;4-1_GL0065988;20_GL0034540;1B-dyr11-07_GL0006909;1A-dyr2-07_GL0028331;1-8_GL0068166;10_GL0065656	205730	258150	246320	291600	278350	269610	270010	226690	250230	231450			O70475	101580	92179	103430	96987	93254	99563	105660	98727	103390	95506
10_GL0068853;8-2_GL0021262;11_GL0140676;11_GL0065712	60951	68287	65616	70894	75372	49095	13012	56734	50736	47606			O70570	4204200	4058000	3938400	4076000	4177600	4333300	4130500	4325100	4186900	4448700
10_GL0071530	136650	140700	126520	130550	140140	114010	107300	78088	80365	88322			O88310;Q80ZA0	5166300	5209600	5460900	5493300	5219500	5230900	5252500	5108300	4982000	4584200
10_GL0074962;1-1_GL0030434;G1-3A_GL0124836;S-Fe20_GL0169250	215410	285220	451420	303520	175390	NA	211540	307570	276550	393310			O88312	286310	277820	280400	288850	286760	306930	302720	289600	270760	295800
10_GL0075367	277290	222750	270270	271660	254990	229750	306810	381280	260870	321360			O88329	192500	191680	165710	174930	189620	175390	186640	183090	172740	192610
10_GL0093032	40493	9151.1	15799	11230	13718	14456	13459	61721	11817	9339.3			O88342	72182	45932	68913	59655	96383	40687	72732	55599	84745	74694
10_GL0098958;11_GL0064789	161300	200390	176190	169250	144260	134200	146190	128940	171120	175960			O88428	23179	11703	14270	10187	21520	16071	23204	17615	20471	14429
1-1_GL0000642	227.64	4649.8	NA	NA	291.5	3044.2	325.17	389.07	3131.9	2461.9			O88456;Q9D7J7	41085	36477	35603	40467	40714	34776	41753	41556	53315	43468
1-1_GL0001529	924390	949040	941720	921130	950130	998090	919010	960960	981780	1000900			O88569	47198	49343	30388	47104	44862	36673	50302	57828	62602	57483
11_GL0002095;MC-6-2_GL0150055	53052	31254	55933	55339	51284	26468	35509	31649	43144	19498			O88593	357690	339310	347550	406360	310920	327750	270150	296280	378240	342560
1-1_GL0002265;1-7_GL0092975	263990	229150	232590	231430	204600	248140	230840	255910	227860	248470			O88792	225190	235320	222460	236910	239170	252780	240710	261220	268880	276980
1-1_GL0003043;MC-6-4_GL0000211;Group2-7A_GL0109897;3-7_GL0034754;MH-6-3_GL0092342;MH-6-4_GL0044125;S-Fe20_GL0051579;S-Fe6_GL0216681;S-Fe8_GL0248696;MH-6-3_GL0047101;S-Fe7_GL0187488	220030	184770	179440	202700	203160	189790	199520	184450	205290	229820			O88844	122180	99770	102280	23493	93766	58582	122030	100900	NA	104870
11_GL0003265	112150	112140	115210	107980	103990	115900	93762	103710	93439	114350			P00329	390940	323520	365180	388300	462520	431350	424690	412000	413530	424970
11_GL0003545	147740	121560	66403	138750	70838	132560	145990	94995	107340	59665			P00405	286640	294380	314420	308940	314650	297460	293340	300690	321960	271240
1-1_GL0003946	94089	74081	82788	95794	86453	73685	90144	109370	105090	129780			P00683	40972	44509	55294	42755	35828	44963	42337	48179	48799	48986
1-1_GL0004559	101180	72111	68313	86143	96756	68432	90043	86591	70654	65134			P00687;CON__Q3MHH8	506210	495510	502320	483550	513880	513470	487490	498180	487890	494050
11_GL0005088	5671.6	4053.6	6179	7049.4	4373.1	6130.6	5993.7	5442.4	6840	5392.8			P00688	5527000	5461100	5544400	5491800	5281300	5360900	5256900	5021700	5050000	4702700
11_GL0006171	35931	26795	31155	35569	32287	30227	31313	41748	30742	39038			P00920	296020	287940	271080	275880	285330	287250	275500	298220	296230	332460
11_GL0006534	268950	247690	263860	267830	247270	262130	260620	271170	245940	272660			P01027	55416	51721	57479	56890	55722	53823	55196	62820	64272	68297
1-1_GL0008837	116790	88998	78700	114500	100430	88278	95913	108960	87200	184610			P01592	4894300	5967800	5626300	5180400	4890000	4814800	4520900	4744600	4894600	5603100
1-1_GL0008925	39770	38279	46355	43362	46669	59777	40119	49198	47909	3780.1			P01630	207240	194040	192160	216560	206530	220770	205430	187770	222770	238710
11_GL0008962	132480	133490	138920	141650	145740	137100	143480	146940	115010	128760			P01631	2014200	1846700	1820400	1816500	1689500	1935100	1553400	1616300	1635800	1301100
1-1_GL0009612	369230	362770	364560	340490	352070	386640	351390	348310	378390	385540			P01633	1788500	1820700	1758700	2001500	1842100	1923300	1844600	1860500	1885100	1976800
11_GL0009802	51292	70470	52590	62159	63737	73371	79917	68871	62550	72102			P01634;P01632	158580	166290	153690	165010	143190	183770	155460	152110	152230	174850
1-1_GL0009843	320600	329390	302060	315830	326090	316060	307690	338340	333560	352210			P01635	1027800	1087700	1077100	1074600	1065500	1122700	1069400	1057200	1104200	1189300
11_GL0010402	199970	209200	207120	218130	217580	222980	193300	224050	208440	238870			P01636	699610	627450	753860	754050	637080	744170	681930	707030	689210	538960
11_GL0010649	523550	503070	462820	528950	529820	504320	481630	530690	450520	474140			P01638;P01637	501990	491850	498550	491160	462590	473600	470940	488710	462920	460140
11_GL0010650	276320	277310	313860	271260	292420	331300	261810	294190	265740	267730			P01639	703870	721720	705960	671110	658600	694970	645290	761360	682110	688940
1-1_GL0011263;8_GL0084412;14_GL0037010;G1-7A_GL0008708	NA	33696	9959.2	6605.5	64347	94264	204130	111670	113420	179680			P01642	476140	476240	480220	527190	511160	509250	510610	527390	538440	543100
1-1_GL0011358	304910	19452	70626	83561	529870	253200	52544	18934	64691	180510			P01645;P01644;P01647;P01646;P01643;P04946	2805800	2819000	2817700	2875300	2928300	2980100	2943200	2811100	2926800	2980500
11_GL0011607;S-Fe20_GL0084968	34454	22477	37715	33167	26514	23419	9563.4	23903	22586	48680			P01648;P01649	2340100	2039800	2242200	2334700	2337600	2245700	2144300	2478500	2139900	2217700
11_GL0011810;S-Fe3_GL0098457	399760	382880	414950	416520	436190	449210	423020	386460	357030	400230			P01657	149820	140540	148230	161750	136280	129090	144740	114710	131500	113280
1-1_GL0012052	141970	161190	150810	160850	179560	172860	170650	178150	177970	191560			P01660	99422	101690	87593	103390	97526	104080	112480	103000	102920	113010
1-1_GL0012145;11_GL0034911	271920	242790	238530	230450	239480	271720	229060	282190	254720	253260			P01679;P01678;P01677;P01676;P01675	6294.3	6593.9	12342	8174.5	10345	6883.7	47373	4649.8	NA	5758.9
11_GL0012274	86227	79338	67519	67951	81309	62255	73881	73640	77963	61877			P01680	369400	345520	336200	389910	397970	390330	402670	430120	396730	449000
1-1_GL0013371	10410	3481.5	NA	24521	NA	4776.4	12408	10321	8773.4	87278			P01724	0.40547	0.15827	NA	0.13815	4.4987	0.57125	0.2428	2.2435	0.12724	0.61468
1-1_GL0014587;S-Fe10_GL0091615;S-Fe15_GL0008547;S-Fe10_GL0150402;S-Fe10_GL0072587;MH-6-2_GL0001655;MC-0-3_GL0054813;MC-0-1_GL0077067;MC-0-1_GL0004210;1-1_GL0077824;10_GL0045525;MC-6-5_GL0095509;MC-6-2_GL0114686	15660	12358	18709	20828	18027	19350	12515	NA	4107.6	11919			P01725	43709	47598	47084	43300	45442	48696	50605	46470	45660	47655
11_GL0014868	1015100	993840	994510	1032100	1022400	1049100	1055800	1035000	1019400	1064500			P01741	22976	19458	18974	11416	18517	25463	18350	6289.3	17195	20422
11_GL0014907	537610	547940	542670	551310	534420	528000	558320	483090	515420	480840			P01747;P01746	726830	785500	752880	565980	686560	818160	615340	623860	745280	699110
1-1_GL0015108	478290	426680	496660	468210	446350	488390	447040	465020	473070	518810			P01750	66402	92140	118130	35947	57744	48098	52803	49428	67954	39448
1-1_GL0015695	187950	163690	172180	189780	222260	174490	250510	217620	210520	258200			P01758	185200	38385	168990	196350	216310	156140	187980	159230	138170	164470
1-1_GL0015696	78639	65547	64666	59622	74419	82901	73983	69730	86105	83991			P01790;P01794;P01791;P01788;P01787;P01789;P01793;P01792	96359	91662	83765	81528	93918	85182	97051	100720	97670	102140
1-1_GL0015814	40052	97480	40855	51521	56281	35583	53828	39675	30525	36485			P01800;P01799;P01797;P01796;P01802;P01801;P01798;P01803	236730	226900	202580	218400	236320	249340	238650	243130	241020	250320
1-1_GL0017506	144630	140250	146690	176990	154810	143990	166560	150680	153090	118460			P01804	52301	48926	52491	40137	50928	47612	54391	51889	51207	50799
1-1_GL0018142	149410	148180	143660	145900	149990	150580	142520	142650	146050	151540			P01820;P01819	672780	630380	601930	142770	799370	668840	701430	723460	703950	569140
11_GL0018497	746030	739390	751830	768000	743230	741480	727860	727770	708840	751950			P01837	9395500	8801300	8111900	8338200	9022200	9602400	9325500	9471800	9789900	10427000
11_GL0020260	17755	22760	21957	19316	16130	18214	15857	16469	16734	29805			P01843	1726700	1757500	1645700	1633800	1750600	1806800	1698400	1676800	1834700	1882800
11_GL0020263	27451	23118	13873	22821	22254	16919	28034	NA	29714	16646			P01845;P01844	18669	12922	17874	1541.4	3439.2	43069	14176	17930	80883	19849
11_GL0020264	50458	64956	22074	69010	15052	46973	35363	187850	70794	27912			P01867	44310	49144	43595	48689	45220	43472	43733	42734	45292	46407
1-1_GL0020905	41801	30076	123270	56460	306680	247480	41422	36566	70514	25259			P01878	12154000	12140000	11815000	12086000	11990000	11951000	11742000	12780000	12369000	12447000
11_GL0021641	90411	81734	81558	72666	93399	100190	84788	92293	93472	83233			P01899;P01895;P01898;P01897;P01900;P14427	106280	118780	106070	118440	112130	113790	122400	116250	120620	121870
11_GL0021701	450620	463390	470170	452730	438900	504410	465520	480970	496210	500940			P01942	615300	650110	668600	580000	570690	547630	447200	521380	506060	402160
1-1_GL0022476	1147500	1041700	1142900	1148000	1163500	1115400	1127700	1127800	1095000	949750			P02088;P02089	225190	200990	234970	266540	238000	271960	286210	255540	244140	224580
1-1_GL0023432;20_GL0015813	173310	172690	191660	203560	181400	183700	155430	164890	147570	174930			P02301;P84244;P68433	85301	90391	89258	86358	91695	86893	84270	73915	78535	83304
1-1_GL0024532	91769	69029	80632	53232	79877	81563	75596	95670	88334	75887			P02816	5315900	4698800	4869500	4894600	4768700	5417300	4768400	5568400	5420400	6076200
11_GL0025380	424170	381040	419960	406900	413020	417180	438960	429580	425260	455050			P03953	30262	21850	22695	26331	34480	24867	26253	43517	36923	32105
1-1_GL0025390	299400	285370	280260	286990	290070	263110	296990	306910	284950	313580			P03958	122050	110800	112740	129090	128830	122720	121940	141830	129850	147810
11_GL0026529;6-3_GL0040209;G1-5A_GL0015694	6999.9	7416.2	8933.2	8807.4	6948	6646.8	3969.5	3461.6	6843.7	4728.9			P03976	151920	167250	173170	155240	155230	207040	152700	196230	164740	167940
1-1_GL0026635	378980	388470	407570	345140	321890	384290	307430	355860	342140	342350			P03977;P01656;P01654;P01655;P01668;P01673;P01672;P01671;P01670;P01669;P01667;P01666;P01665;P01664;P01659	61571	68844	31147	41956	49403	19581	37557	57538	64368	46762
1-1_GL0026659;S-Fe1_GL0135833	293780	284710	387610	368560	326690	274490	349890	258340	293210	293520			P04104	123420	20654	23624	13169	26009	18258	18963	20494	169420	20566
1-1_GL0027389	17141	37741	43377	44114	27657	28831	38363	42421	32969	6263.2			P04444;P04443	36105	1372.9	NA	NA	NA	NA	1504	38405	NA	1128.8
1-1_GL0027394	863550	877210	852840	895570	856320	925030	899260	856940	861470	917890			P04939	511290	930640	764460	659170	627880	591090	769600	800120	715430	733910
1-1_GL0027791	47735	49974	52366	53821	52285	50195	47260	64242	52892	57723			P04945	348820	369260	387820	396840	369020	424040	315000	334290	319460	359670
11_GL0028376	151840	164670	187080	192820	143780	160350	153550	138410	146240	116140			P05064	142600	116630	122520	127150	136560	138350	143480	136070	137340	134260
11_GL0028428	64387	73126	91652	67375	53594	77592	55813	99219	64021	79139			P05201	15105	14793	NA	11039	13287	15190	NA	26793	13383	12112
11_GL0028479	38048	NA	63501	32315	59680	43342	46699	34233	54401	24187			P05202	147740	140580	152280	149110	135360	143100	164510	160230	152290	156710
11_GL0028561	50496	28807	43119	46636	42393	44852	63975	52159	NA	56004			P05208	13110000	13268000	13810000	13726000	13113000	13063000	12760000	11949000	11778000	11161000
11_GL0028726	48012	50623	43239	45369	48955	46358	48831	46053	50324	45000			P05213;P68368	247810	237990	255950	261760	246490	249340	239640	220500	241410	236550
1-1_GL0029153	47318	52374	48816	48710	40942	47599	46643	46998	43298	66677			P06151;P00342	785770	864630	832370	834280	809190	831520	792910	788400	782140	869100
1-1_GL0029988	82907	92225	84559	97491	86449	98571	70964	92511	82962	92246			P06328;P01754;P01753	26688	27312	19167	19654	1367.5	6457.3	27736	24246	7119.4	8257.5
1-1_GL0030443	82874	67296	70839	72901	50437	74709	58894	77279	76035	107460			P06330;P01757;P01756	1808200	1805300	1808900	1753000	1829400	1851200	1800100	1849000	1803000	1952900
1-1_GL0030452;1-4_GL0006688;1-1_GL0144870;1A-dyr1-07_GL0010461;Group2-8A_GL0041768;1-1_GL0091757;1-1_GL0048779;6-1_GL0049235;1-3_GL0067338;6-5_GL0012467	128800	135730	165160	169740	120270	96090	112540	121300	94511	67413			P06728	171220	182440	173940	164540	187170	141460	136220	166130	142820	166320
1-1_GL0030908	208950	224430	211740	183800	167230	243290	202910	204330	226290	200040			P06797	35308	NA	32428	30988	NA	NA	44362	32636	43809	41540
1-1_GL0031225	543290	484260	541500	527310	531030	535320	516280	479150	475980	495830			P07146	63542000	64156000	61620000	65497000	67022000	65923000	69040000	66413000	66396000	55403000
1-1_GL0031226	1022700	736970	946420	942310	832100	903460	863520	854500	776540	576760			P07309	633060	631400	688790	611760	605320	600550	599030	641590	671500	682850
11_GL0031897	795490	762130	853290	875710	869910	870100	796310	746680	754130	700000			P07356	1052100	1018600	1055700	1085500	1054600	1108400	1088400	1051800	1055000	1118300
11_GL0031899	385120	284770	346490	260860	435520	266830	410420	504740	375690	310260			P07724	1882000	1899200	1980800	1881000	1814800	1894300	1888700	1830400	1908500	1942200
11_GL0031901	1367500	1313900	1484100	1525700	1311200	1380200	1372000	1298100	1339000	1299700			P07743	274660	222580	251750	267150	248710	239100	243320	285720	273550	276470
11_GL0032640	37852	27306	27366	35734	37811	34324	28878	32459	33563	29605			P07759;P29621;Q80X76	3455300	3314500	3285100	3280000	3168700	3426500	3176200	3360400	3471500	3502100
11_GL0033162	260960	257860	253950	272430	274280	284520	265400	276610	273000	309520			P07901	48446	78890	60610	64445	98508	93220	75664	76841	106370	83891
1-1_GL0033364	33318	35079	35680	34692	36064	34597	31210	36914	34337	36575			P08003	80264	83020	98376	91632	107030	100290	84550	106890	111590	106640
11_GL0033854	244460	256100	276690	261340	249770	270390	263790	240670	251390	251680			P08113	211170	215080	217640	202410	222330	221930	215480	235690	222470	293590
1-1_GL0034633;MH-0-5_GL0067897;7-5_GL0150318;23_GL0096062;1-7_GL0140302;1-2_GL0015611;4-7_GL0019478;Group2-2A_GL0085143;2A-dyr14-07_GL0049191;1-1_GL0031879;14_GL0137105;2A-dyr14-07_GL0043773;2A-dyr14-07_GL0027383	243230	250080	278770	304690	341630	403360	331890	382360	378460	457160			P08207	NA	192560	NA	NA	NA	232270	191230	NA	192040	NA
1-1_GL0034657;3-7_GL0070275;MH-6-4_GL0103150;MH-6-1_GL0118148;47_GL0080676;MC-0-1_GL0074098;8-5_GL0024395;5-3_GL0105134;S-Fe2_GL0210641;S-Fe8_GL0008502;8-1_GL0066574;MH-6-4_GL0055511	161910	150540	145080	132320	124290	176930	124290	147550	190180	194470			P08228	1891400	2045000	1993800	1950600	1789800	1961800	1996500	1944900	2063900	2160000
1-1_GL0035152	19899	36083	18635	14858	NA	21639	13900	21440	17922	18920			P08249	489530	504530	520450	509510	454220	478810	457230	498120	475450	506240
1-1_GL0036247	478000	507260	531740	507550	484060	538060	493580	494380	513440	548320			P09055	70910	58134	68184	70221	71326	73930	66350	63714	60822	67137
1-1_GL0037958	NA	NA	42810	27899	29575	26949	21676	17190	41548	39797			P09103	447460	410710	385380	432790	419370	441000	472280	487710	479270	475610
1-1_GL0038124	270780	252510	233380	238930	255260	280370	258970	274360	246120	271290			P09411;P09041	169090	159760	159460	168150	115750	135970	126390	134430	123150	143830
1-1_GL0039242	107140	113440	110950	124350	128150	106530	110630	132340	105500	111110			P09470;D0G895	339100	339590	330840	348810	343080	347080	332150	341820	361910	364640
1-1_GL0039822;MH-6-5_GL0091986;23_GL0046726	95958	79783	62958	74790	127310	96551	154570	100630	98663	74988			P09528	446100	437480	439240	441850	454620	450780	453440	442290	456590	473480
1-1_GL0039894	242570	192550	233040	191440	218110	200750	221290	220400	252020	245100			P09671	256860	210530	236040	222510	226760	237610	240630	241890	252390	266740
1-1_GL0040368	688330	611800	657150	671300	683530	684030	685650	643220	723700	615440			P09803	1111000	1110400	1118900	1128700	1125400	1123000	1129800	1131900	1131100	1182500
1-1_GL0040818	85986	79488	78064	91115	86364	90907	92298	99149	101110	113410			P0DP28;P0DP27;P0DP26;Q9D6P8	215370	195250	196600	204880	215540	236570	217090	260720	263370	255590
11_GL0041387	518370	431820	453380	423550	420320	407400	424600	416110	497390	505270			P10107	94252	96461	92474	98469	81932	77381	92970	85171	83896	61150
1-1_GL0041447	38364	47130	41519	33901	32281	30173	42087	35134	39731	25089			P10126;P62631	665750	658730	655650	674970	714600	636470	638570	658690	645700	799610
1-1_GL0041844	60992	50561	40200	37190	53372	56148	52005	46526	46582	56395			P10605	358800	395970	393620	332430	369470	365290	366470	344730	451700	418050
1-1_GL0041857	14704000	14741000	14857000	15507000	15791000	15188000	14667000	15480000	15294000	15099000			P10639	261940	233530	233090	227670	238240	226320	232350	273260	241440	244760
11_GL0042282;S-Fe4_GL0132117	37157	49051	46888	39326	51887	53193	68705	36762	65795	60677			P10649;Q8R5I6;Q80W21;P15626;P48774	86715	83326	83381	75362	78698	98088	91201	77878	76001	100300
11_GL0042298	623970	597380	630700	648100	670150	660370	601490	551400	628660	617480			P11031	64535	65625	54968	70571	67565	83329	55114	73033	66905	62657
11_GL0042302	26105	27658	23748	24047	29168	24156	30431	26896	27629	7131.2			P11088	142680	4952.5	15099	4522.1	10383	30376	47428	12632	7692.8	16969
1-1_GL0043110	123320	91019	104150	119500	116120	104280	105730	91916	104660	94148			P11352	110910	99576	92572	111220	119060	122140	107140	109870	126570	126120
1-1_GL0043549	89742	82727	69774	89777	81525	87914	93220	107850	111880	91169			P11438	162640	163060	163980	157230	135100	168640	140240	150610	158220	164980
11_GL0043820	487150	483920	488000	470260	475770	487240	502490	478100	497480	518380			P11499	93021	84022	74238	84437	100980	106790	111900	89709	112800	117360
11_GL0044172;S-Fe7_GL0198557	734750	684710	688610	677340	663690	669910	666830	652850	665390	656450			P11589	4409100	4414300	4994600	4934500	4365500	4298400	4693800	4449900	4427200	4107600
11_GL0044796;1A-dyr4-07_GL0032856	1014100	970320	990460	950650	1036700	1015400	991750	963630	998470	745300			P11590	253400	229190	246240	254430	259710	289830	284110	287690	269180	287010
11_GL0044803;6-3_GL0059447;G1-5A_GL0015705;11_GL0131224	263610	282240	264940	264950	253680	291490	275060	221280	234470	274760			P12265	96261	54421	84130	78781	73665	90709	47984	NA	97846	143180
1-1_GL0044944;MC-0-1_GL0079955	32480	33856	36116	26487	39977	29264	31567	28614	36962	37517			P12382;Q9WUA3	7702500	93161	6591900	7000000	604580	9432800	3454700	5670100	4983800	7495700
11_GL0045555	4248.3	5138.8	6750.6	6183.4	6933	10692	5586.8	1340.3	NA	2545.7			P12787	243980	251290	243040	306130	265900	209340	134910	312890	210990	286940
1-1_GL0045586	355620	350630	322090	367990	352000	371300	334420	349410	374700	398420			P12815	46999	28658	NA	NA	49768	NA	NA	30970	29876	NA
1-1_GL0045676	170610	144210	155310	143050	156790	162790	167900	180510	155700	188460			P13542;Q5SX40;Q5SX39;P13541	217440	145620	199560	218370	204420	215530	229670	169390	218610	132040
1-1_GL0046107	938400	837680	905020	895580	922360	839670	861400	773040	771770	648110			P13634	1346500	1341800	1341000	1437500	1355100	1416800	1372000	1317100	1289000	1352400
11_GL0048662	117030	133000	132360	130010	133150	126930	134160	127270	127310	146190			P14069	631620	602600	557770	737020	803010	631660	612660	618450	628550	670600
11_GL0048685;8-2_GL0114566	29624	4036.5	1871500	16803	80784	15804	NA	NA	1404300	71330			P14094	819030	791840	801800	812750	779350	833240	799730	845910	824810	869950
1-1_GL0048765	NA	6344.4	1989.6	1986.9	2382.8	NA	NA	2447.3	NA	NA			P14131	46591	34607	46198	53427	42627	48948	53471	39316	51008	37803
1-1_GL0048867;1-1_GL0066104;34_GL0028183	272360	344120	310040	326000	283780	269300	250250	330940	275980	309590			P14152	568030	595560	583370	605420	592590	555940	566800	589010	577050	620670
11_GL0049644;4-7_GL0083512	133610	135980	160990	145800	122990	160230	132710	162150	142410	170920			P14206	16630	13761	10570	10070	NA	1029.9	6986.9	7749.8	6400.2	8845.7
1-1_GL0050368	149870	122830	134730	128800	152770	156350	145490	157900	150260	193910			P14211	274040	254640	279400	269040	262900	268930	274460	296850	280060	304320
11_GL0051057	3474.3	NA	160430	8607.5	187720	186100	174630	226240	NA	211340			P14426;P01901;P14430;P14428;P14429;P03991;P04223;P01896;P14431	97055	105510	61505	91464	113920	112650	108150	107660	94534	99381
11_GL0051060;6-7_GL0081591	115470	46836	79768	85861	77833	131650	111020	148200	134340	138360			P14438;P14434;P14437;P14436;P14435;P23150;P04228;P01910;P04227	137080	136810	133130	133840	135350	137880	134880	134180	140850	131220
1-1_GL0052826	1708.2	946.09	2030.7	1617.7	1266.8	1729.6	1581.1	1463.3	8645.5	3743.2			P14483;P01921;P06343;P18469;P06342	327230	328820	330850	333540	322800	326760	298150	323020	293610	308460
11_GL0053212	66666	43731	66806	73990	47410	29801	46780	49896	74788	70625			P14869	11811	29248	21644	14834	7947.3	31874	7266.1	24000	20734	23803
1-1_GL0053884	418530	365610	368180	353540	364380	420050	361220	477920	450160	424290			P15864;P43277;Q07133;P43274	173310	212760	167800	168550	192630	177280	184540	179910	189020	205330
1-1_GL0054161	441320	403640	271960	444520	321950	288020	296260	255970	265700	242920			P15947;P15945;P00756;Q61759;P15946	2305900	2425700	2359600	2349000	2369500	2434200	2067800	2231400	2226300	2380100
1-1_GL0054810	151450	142440	131790	159060	154200	146490	154960	161090	127650	132120			P16110	481840	401610	410870	382010	397900	434270	409340	410720	473180	466150
11_GL0054940	61696	57284	60297	41857	66612	36540	40649	64819	42387	38435			P16406	1803200	1720900	1800600	1831500	1803400	1814800	1775600	1793700	1812400	1928800
11_GL0055314	235920	234600	224430	238480	219860	241880	225530	225250	222490	234070			P16546	318580	209060	246540	291000	274950	245160	242470	206300	211360	251860
11_GL0055324	68415	59575	65938	53390	60589	40194	57398	64470	69226	65413			P16858	456760	445070	408970	409520	417940	476980	474660	445570	464890	520740
11_GL0055390	73426	74230	75188	72881	73944	73935	75569	81469	74433	76761			P17047	13678	10790	10897	14506	11128	11638	13765	8868.8	12309	14406
1-1_GL0056183	2034200	2043600	2048800	2050600	2121600	2076100	2046700	1977600	1867600	2059000			P17182;P17183	564460	538390	532020	559330	560220	534670	544420	549400	526930	569140
11_GL0057242	109260	122760	121420	115250	117970	136110	116200	123810	133600	127360			P17439	5964	29952	NA	146570	22546	93308	26112	43259	34749	44878
11_GL0058639	133100	128250	119300	114280	138980	62847	111280	109660	87721	130330			P17533	96856	96153	93650	83967	92743	89660	94744	68801	103880	101460
1-1_GL0058790	13152	13833	13383	8874	12049	11677	16856	22151	14390	18308			P17563;Q63836	1412200	1417200	1384200	1472000	1475700	1460900	1439600	1439800	1417400	1527500
11_GL0059124;G1-5A_GL0071216	464160	487000	469940	464760	450550	471320	449220	444120	410160	441720			P17742	269540	244830	270600	243210	229800	218210	246020	240640	219080	228580
1-1_GL0059506	59304	19664	44903	9607.4	2995.3	38557	37268	9127.9	4762.8	34678			P17751	179240	187680	190080	181820	189030	201240	188520	170740	179210	189800
11_GL0059511	39691	36726	36093	41065	54324	49205	50579	38305	34820	36792			P17892	2758500	2877400	2724000	2773300	2825100	2848100	2650900	2858600	2858100	2818300
1-1_GL0059664;6-2_GL0051646	74205	60271	52031	56655	54731	62124	66785	61766	61907	61928			P17897;P08905	797010	794850	796880	807100	824280	864820	854230	925190	878190	933510
1-1_GL0060070	58021	42033	50592	57786	52902	50835	53494	48143	53079	51920			P18242	310960	336880	350730	376310	324290	318580	300290	284240	294500	227050
11_GL0060737	696160	639770	654750	705880	708510	679060	697100	681870	729410	720270			P18524;P01806;P01812;P01809;P01810;P01808;P01807	174760	142590	164400	163070	164760	178360	169670	175080	185060	188130
11_GL0061743	131550	127630	130730	125540	125490	139260	123130	116660	136350	138490			P18525	316750	238530	245870	259010	216700	266260	241410	278010	295740	290380
11_GL0062566	240540	210040	371350	291120	319950	250180	182790	243880	336470	480530			P18526	16457	16353	18608	22256	18724	17338	16341	21447	18186	21856
11_GL0062567	34678	40090	10734	8342.7	138870	23894	54296	46285	32059	72482			P18527	56997	1391.8	101520	35938	29581	1194	15277	31996	19311	57826
11_GL0062568	11747	65506	46528	5359.7	26012	45835	4403.8	28804	16130	58988			P18528;P18529	462420	450210	444220	482860	466270	463220	463500	456960	452220	509400
11_GL0062569	287490	274080	269210	285710	297890	264390	290250	293750	288800	294210			P18531	1996000	1908900	1795700	1710300	1482000	2000300	1571000	1849800	1778700	24939
11_GL0062770	167660	180650	173000	165450	165820	177270	176960	187270	170790	192310			P18572	194950	194870	161590	161320	183460	210910	192540	192890	208620	225740
11_GL0062779;11_GL0122981;8-3_GL0048164	544020	488820	452540	418800	495360	473150	475050	545520	563140	553590			P18761	8340900	7757600	8012100	8686900	8663600	8435300	8679900	7995900	7903400	7809000
1-1_GL0063097	266100	257180	328650	240870	285360	265350	276250	332760	275170	319960			P19157;P46425	196200	213890	197330	172460	168310	208370	152910	171080	176080	166640
11_GL0063269	207090	217050	235100	224050	233020	176100	211610	201440	211820	178070			P19467	882880	954960	888830	905780	912440	960620	897300	942110	947780	986470
1-1_GL0063435;3-3_GL0108964	269350	279240	269580	264820	301040	284360	283410	279600	277130	302200			P19783	385450	377760	385690	399340	382210	404410	383700	398060	380680	401700
1-1_GL0063993	379840	438300	366240	393570	370430	408630	386760	371520	393570	402080			P20029	374840	368160	357980	365530	365920	390320	384450	398180	427070	408870
1-1_GL0063995	195440	177610	172020	189830	204920	197980	175580	202100	197200	222780			P20060	NA	54182	48419	NA	NA	NA	73220	112450	63675	86506
1-1_GL0064345;MH-6-3_GL0063230;32_GL0061905	388770	391430	360640	377580	373460	424970	407310	371140	344300	419810			P20108	91840	81319	81498	74723	71474	78704	66568	65788	74135	78370
1-1_GL0065399	298360	280530	326450	351240	287660	349440	311500	410090	356230	375310			P20444;P63318	135820	141090	151140	152360	139540	148090	106190	131810	122690	133530
11_GL0065713	NA	36.488	NA	NA	NA	NA	NA	NA	NA	51.503			P21278;P30677;P21279	89037	86550	78321	89253	82500	92188	83835	82538	73887	88636
1-1_GL0067993	56888	NA	21362	30422	NA	20352	36646	44907	32519	NA			P21447;P06795;P21440	303050	307050	313860	297680	298940	306440	305240	305760	320030	342390
11_GL0068447	73550	2335.6	24135	29415	20094	12995	39553	21508	23273	12247			P21550	1.1905	NA	0.58503	1.8234	NA	0.19581	NA	NA	1.7612	0.44413
1-1_GL0068882;32_GL0103930	199850	180940	202420	181050	176350	308890	294110	300360	298910	358250			P22599;Q00898	1038300	1059000	1035500	1033400	1053200	1088100	1092400	1095200	1067600	1176400
1-1_GL0069134	232640	232270	227060	239440	238450	237300	237210	258980	257550	252070			P23780	52059	61706	62524	60646	60512	56057	64080	78881	82968	75834
11_GL0069170	12724	108770	37740	136020	140120	136010	157670	134630	110110	127680			P24369	405490	421680	404960	400600	436850	437310	372580	460610	446120	432590
11_GL0069306	213930	209820	209850	202860	204270	219570	216010	235070	229470	259640			P24527	1921.6	1970.4	2655.6	2239.6	2401	2447	2062	1752.9	2483.5	1498.6
11_GL0072670	28071	18407	NA	17506	NA	NA	16960	17450	18885	10092			P24549;O35945	325850	297220	245340	325740	306370	324600	311750	299030	295880	295490
1-1_GL0073107	316110	283560	311270	307950	267300	326460	321960	283800	326350	288150			P24822;P24823	5006100	4740200	4715900	4875000	4790100	4982600	4912700	4654600	4613200	4689300
1-1_GL0073618	47766	33592	40330	47762	37259	50685	46700	54852	45587	58147			P26040;P26041;P26043	431010	399560	417030	420900	438780	417860	422860	436220	414950	446600
11_GL0073714	216320	187910	198980	206070	223840	215090	227430	248210	236270	231160			P26231	70162	68972	63441	57603	62622	88211	60694	87886	78593	92862
1-1_GL0074148	182400	228810	193290	195340	186560	206180	202320	201460	206180	228630			P27005	8762.7	62638	11445	20665	NA	15343	13012	14879	13172	40245
11_GL0074655	136890	139360	102930	157450	162120	185910	161700	150080	174860	204020			P27773	310120	270140	289140	278360	271060	282410	263270	284650	291180	311660
1-1_GL0074860	407350	359090	355680	498060	390320	388270	504970	432770	385400	318380			P28063	48971	47130	44371	48100	48627	48739	44730	54886	53273	48389
1-1_GL0076153	2136.6	8433.1	10364	12720	12807	7058.3	9425.6	NA	11345	11493			P28271	16535	14988	12842	15377	14908	13826	20386	15148	15238	15958
11_GL0076757	156530	153750	154160	150690	157300	158690	161310	158870	157160	126560			P28312	74827	21146	76449	32944	91265	128590	38017	125290	61389	124470
1-1_GL0077524	283160	270050	250240	269620	283510	242970	274420	297200	282800	259410			P28474	27994	32206	19740	3263	26278	25172	1245.2	5403.3	22214	35998
1-1_GL0077781	7794.1	13047	21878	19447	26531	42437	35532	11308	12304	57482			P28665	16652	12513	11973	13039	15858	13405	18103	NA	19043	13121
1-1_GL0078624	24160	20121	17229	23634	17701	22986	20721	24275	24689	26875			P28825	588470	576480	582730	608690	610850	612580	621980	614660	618470	641980
1-1_GL0078745	132840	144240	153260	138480	177440	137190	151570	160080	155600	207910			P28843	1998600	1925400	1859700	1985500	1978000	2072400	1975500	2005200	2005000	2144500
1-1_GL0080583	130600	137430	148150	137180	140550	138350	140520	148550	140630	148930			P29391;P49945	357290	340230	326640	328260	371960	312900	382020	379720	385840	355820
1-1_GL0080605	59971	52992	53605	50926	49792	55780	51917	60687	59233	66298			P29758	131350	144260	131350	133270	132990	141590	116620	93424	133290	158030
1-1_GL0080606	56263	50019	41631	56731	48917	44491	57340	57287	57621	52529			P30275;Q6P8J7	1113700	1111200	1096400	1144400	1120300	1170300	1130700	1071000	1081100	1102800
1-1_GL0080710	224510	179910	188080	250690	200500	213150	216640	177640	180090	131920			P31428	1036900	1056500	1043500	1050600	1044200	1043300	1000600	1068900	1011700	904490
11_GL0081446	74704	67205	77987	78569	80767	82624	74471	79769	79404	90496			P31725	275140	291020	280620	277600	295890	270740	215420	249880	256600	267540
11_GL0081716	173620	203680	214610	191460	187630	195430	202860	195370	189850	209780			P31809;Q925P2	3553800	3416900	3491900	3390700	3628000	3552200	3301300	3545800	3610300	3683400
1-1_GL0082854;3-4_GL0054324;1-2_GL0110297	654270	626160	646620	648760	633410	658480	628510	644860	665920	653490			P32261;CON__P41361	195090	188340	225470	195840	187320	183520	194820	197940	230840	221300
1-1_GL0083048	1713700	1646800	1605700	1696200	1703500	1777300	1656800	1747100	1786800	1863100			P35230	8525800	8034600	7788200	8410100	8985600	8877100	8732800	9290600	8849400	8406400
1-1_GL0084350	90901	70400	72122	65948	69299	74692	73923	80525	70934	81119			P35441	36491	30376	32099	31872	38599	42638	35470	45110	41154	42938
1-1_GL0084994;Group2-4A_GL0034379	148270	173770	158990	180040	134190	136000	139010	115260	114200	88903			P35486	19588	6507.6	12403	15682	20516	26405	24208	11241	22442	35012
1-1_GL0085365	657250	615650	668170	663620	675260	700730	678220	707370	685140	706390			P35564	61719	94581	125790	97804	98207	27177	33541	91377	107890	49939
1-1_GL0086098	31360	85340	261270	9132.6	20940	232690	3022.4	224210	3874.6	130230			P35700	77203	70451	69467	84661	76821	78028	79399	78807	72600	84103
1-1_GL0089280	67058	67916	67445	60448	67273	69266	65332	70628	71647	77437			P35980	52963	85575	109720	120740	72276	92166	79549	63909	95599	74872
1-1_GL0089286	393440	385530	489450	434890	390550	382130	330620	305750	317990	203600			P36552	66030	85969	83712	93618	77450	75828	78862	63724	56392	57075
1-1_GL0089402	267610	291030	289930	297180	277150	275260	262810	230440	191630	161290			P37040	53588	66626	54762	67349	57509	62372	69645	62082	65296	81021
11_GL0090262	15093	16072	17566	14673	15347	20560	17679	18961	19089	21276			P38647	358180	332620	407250	411060	369770	377060	402170	342750	343430	406090
1-1_GL0091513	326840	360840	348070	369060	351690	331900	345330	335020	352670	375010			P40124;Q9CYT6	86482	85642	91417	88925	78442	90381	85793	79361	87665	107320
1-1_GL0092522	2587100	2221000	2412600	2476200	2328600	2215800	2254300	1891400	1890200	1395300			P40142	563400	573720	555110	586000	576940	570830	595610	552520	529510	556920
1-1_GL0093572	91876	96479	94673	91869	97891	97362	97266	89820	95372	97451			P40237	737800	751320	757210	737550	724080	681730	763780	828510	790930	821070
1-1_GL0093739	538110	508140	501930	504500	539060	529310	520410	558090	541210	561910			P41731	112120	98106	102890	109530	114340	116310	114480	112200	127600	126300
1-1_GL0093801	34241	28003	11106	31696	28852	34908	35053	13998	14802	46790			P42125	50476	38110	37496	51386	46504	53787	57706	24683	51052	64838
1-1_GL0094467	48770	44550	59994	71460	53323	60965	59976	49223	45531	42175			P43137	1002100	976910	946630	886680	887210	999970	844010	887250	1009000	1166100
1-1_GL0095104;MH-6-5_GL0183530	857310	829770	798690	861810	859980	770410	848890	825190	863660	935640			P45376	236160	251470	266470	231010	226390	310570	191810	200140	242430	229210
1-1_GL0095242	807430	779240	756970	810700	808600	808030	790280	832730	808040	780380			P45591;P18760	29096	21056	23814	18370	18590	24842	16163	23970	23256	31161
1-1_GL0095657	406910	415790	430480	397280	416480	408950	410740	424530	425790	424890			P45952	231540	217890	245280	262790	243190	264120	268110	277090	297600	300610
11_GL0095758	27535	25358	27604	30425	28758	26110	25101	22977	24430	29561			P46638;P62492	130390	132870	141720	154200	151790	128730	123660	152990	149300	150880
11_GL0095770	149980	135970	156430	156100	170540	190620	173090	194310	178110	188670			P47738	777360	717320	699570	757360	746460	754290	761080	745300	780970	764120
11_GL0095772	20228	16341	17288	16202	23365	23005	23205	24069	20916	25086			P47740;P47739	176970	159220	172210	180620	163310	180190	169180	171800	172400	168850
1-1_GL0096134;10_GL0063529	515130	524300	540900	549280	552480	531810	543000	580650	562430	592060			P47753	15678	14426	14473	11141	18642	21793	9826.9	14075	NA	19741
1-1_GL0096137	124990	138570	127100	123000	122400	131760	136570	137350	133730	146010			P47791	91853	99111	86791	82852	105300	97476	86343	104830	87081	106610
11_GL0096768;11_GL0136132	95108	86123	94378	96172	92792	96427	100770	107000	109840	109490			P47856	87818	85378	94986	86996	86208	85861	66628	91728	75749	105020
1-1_GL0097453	286720	270880	268490	276490	274470	285700	278500	306630	306230	313760			P47962	56227	65584	67186	60804	69690	65442	72766	71158	77603	81964
1-1_GL0097533	316140	280710	249430	294740	288170	280430	287490	284510	287970	296590			P47963	9426.7	21203	16235	12643	12084	19639	23902	17727	36489	19225
11_GL0098946	70183	75763	65750	48785	80645	76033	71848	54786	54697	52636			P48036	98748	91645	95195	90550	82643	87864	86345	86872	77340	85963
1-1_GL0100030	90523	98887	83606	102610	106150	111970	97522	98392	107210	112620			P48678	82608	53639	71307	67072	72187	67663	68872	62941	73856	81431
1-1_GL0100152	228700	249640	213460	226910	230750	275880	266770	272730	259550	286440			P48999	97754	63168	81828	72080	59827	95811	64366	77847	80493	94699
11_GL0100278	107270	110100	114230	116200	99361	118980	107000	114770	120020	119800			P49183	616900	681400	703020	653020	668460	627330	652830	738470	602070	758900
1-1_GL0101353	5516.5	83084	4744.4	14154	4629.1	3627.7	52429	3323.6	NA	5087.5			P49312	64266	NA	59441	13144	52155	79675	18140	66704	71607	43471
1-1_GL0101438	1171700	1073700	1264700	1316900	1160400	1120200	1183000	1024100	991120	791220			P49722	4659.7	14482	8789.5	10791	8697.9	11190	9774.8	5682.5	8934.1	3243.1
1-1_GL0101526;MH-6-4_GL0014773;6-4_GL0010578	51295	46775	49352	46698	40155	38862	44037	51041	61404	54467			P49935	101710	77874	82050	66440	74258	69753	56949	NA	48621	58709
11_GL0101716	97179	91735	NA	115210	96653	70409	65310	50120	46418	41967			P50247;MH-0-3_GL0069232;S-Fe1_GL0142651;MH-0-4_GL0004632;37_GL0013898	164900	156900	157980	163960	172150	178240	173510	179140	180400	191220
1-1_GL0102102	86480	96091	100330	96510	85549	94743	99689	94278	91959	84430			P50544	56852	49297	46871	51900	45816	58586	53784	45256	54764	52317
11_GL0102613	1045100	1193300	1180900	1269300	1085900	1188700	1109000	1109900	1164200	1191500			P50709;Q5G865;P50713;P50707;P50704;P50706;Q64016;P50712;Q5G866;P50714;P50711;P50708;P50705;P28310;P28309;P11477	1922500	1950200	1909600	1997000	1936100	1803900	1768400	1808700	1680900	1996500
1-1_GL0103727	383600	330980	333010	375060	369050	389450	401710	363140	364910	411640			P51150	12540	12753	17969	15879	13807	14953	19173	12780	17300	10287
1-1_GL0103775;MC-0-1_GL0066732	14216	16724	17013	28833	18383	16508	26267	7842.3	12308	12235			P51162	139490	157550	126710	132850	141480	154440	151120	145940	147350	179870
11_GL0104030	85859	81349	80625	73967	84921	88405	84632	94912	89853	95177			P51174	140340	134200	130530	142030	128480	136530	136670	145410	146060	148750
11_GL0104167	220120	200340	169260	169440	162390	202540	163640	186690	178530	199850			P51432	16792	3262.9	13671	15657	8678.8	14843	11325	12214	6343.9	10654
1-1_GL0104180	24619	15553	14007	11122	10882	18928	8980.6	12629	11229	13892			P51881	746060	708020	714940	700920	746120	772790	765030	722440	735530	770820
1-1_GL0104331;Group2-8A_GL0070902;S-Fe6_GL0127411	46874	52273	51796	99797	15011	53582	51529	47075	68237	75739			P52196	31112	25042	22485	33646	30807	34980	24742	33059	32084	28388
1-1_GL0104334	NA	NA	NA	NA	178210	324050	NA	NA	NA	NA			P52480;P53657	253450	262560	260710	268750	250530	258700	240200	238780	238050	260740
1-1_GL0104702	109130	122590	120530	115970	100150	103500	127350	108750	114470	117160			P52624	77832	95164	68631	97090	55503	83890	90363	91824	107120	76314
1-1_GL0104842	37367	38756	35770	32588	47763	30036	61996	32877	53260	8898.1			P53026	44012	NA	30383	40297	33690	NA	NA	NA	33375	NA
1-1_GL0106191	80277	78029	83221	88848	91061	83688	85177	72509	83904	84071			P54071	436680	398530	419390	446480	370360	350260	476870	436650	411980	438850
11_GL0106913;6-4_GL0079360;3B-dyr36-06_GL0005182;Group2-2A_GL0042555	159770	154330	113070	169450	116200	154900	113090	124440	116630	137420			P54116	216150	239990	221630	220670	230310	229210	199050	266660	216780	234690
11_GL0106920	69564	112120	90441	71164	92164	86271	76374	102280	95053	97152			P54869;Q8JZK9	152050	158020	163230	150050	156570	161250	123380	143510	142290	157010
1-1_GL0107181	50521	37023	36995	37162	37026	35311	34434	32043	39110	43610			P55050	322350	354420	298970	163560	307850	471650	333920	374150	388860	267890
1-1_GL0107764	NA	NA	NA	276060	169770	NA	NA	NA	NA	NA			P55292	537740	492560	536020	531170	483590	569630	469230	612640	540430	632680
1-1_GL0107767	NA	11654	NA	NA	12582	NA	NA	NA	13753	NA			P56135	116090	111110	112610	106470	130550	117650	107680	121310	117920	119470
1-1_GL0108082	167450	172060	191550	185210	140840	195840	177240	210820	197480	229380			P56389	67907	110920	270190	132800	125520	72245	103390	99154	9775	75068
11_GL0108656	497010	507780	500910	491740	512890	564980	530670	544140	512720	552440			P56391	19159	23141	27650	25164	27126	22301	23707	24916	6798.2	15935
11_GL0108772	1008600	922210	1027400	1037300	990660	1007800	1017200	1039700	908990	894270			P56480	1845200	1779600	1804400	1840200	1834600	1865900	1780300	1814300	1813000	1877500
11_GL0108888	326610	305270	294030	294310	289200	341830	308390	319750	339290	317270			P56677	148530	140970	136800	130830	138190	144620	151590	136430	136860	144100
11_GL0109255	256380	221210	240160	262910	277370	279210	256330	273050	290130	292320			P57716	138830	143210	120020	135240	131430	124730	132610	126040	108350	70149
11_GL0109256	1.5867	0.46891	1.0318	NA	NA	0.25222	NA	0.37032	1.1714	2.1187			P57780;Q7TPR4;Q9JI91;O88990	378600	341730	350020	384260	363390	370200	380360	364490	384790	364020
1-1_GL0110379;1-3_GL0065887	1091500	1044600	1153500	1073200	1042500	1114100	1113600	1135200	1094400	1208000			P58021	61274	55192	51843	53750	57881	61202	60015	64871	62830	71729
1-1_GL0110595	123200	130090	137230	133680	116720	140950	126850	127080	129030	145660			P58242	622590	422370	478610	493490	532370	539950	526410	613430	588780	543990
1-1_GL0110655	113310	127350	95860	93753	91634	113200	111350	118410	131270	108880			P58252	47179	41953	34462	52800	52388	35299	50292	42630	37355	44186
1-1_GL0111475	127310	105440	84223	50793	72031	80114	89616	24869	129830	50158			P59108	36609	45192	49729	47006	39456	28391	11990	59437	39615	38884
11_GL0111645;S-Fe20_GL0183304	104730	103640	91788	93215	96212	98763	85985	102470	112330	119530			P59999	61024	61931	57357	58361	52084	62713	56057	68151	57337	62071
1-1_GL0111812	52295	52946	52474	69267	79462	54789	69131	67091	65895	64429			P60335	NA	1074.7	1955.9	286.4	NA	NA	1461.9	1592.7	547.62	678.23
1-1_GL0111814	94844	89844	96981	103140	92697	94447	99337	95291	95711	70854			P60710;Q8BFZ3	473600	394210	555570	543800	461710	474740	460580	428650	488650	434130
1-1_GL0112011	469020	397600	403740	425180	417400	211350	529780	478060	329410	247470			P60766	55548	94042	90330	146270	88347	67742	33145	76810	108540	66758
1-1_GL0113093	692240	701980	685280	707150	672010	730340	698150	768950	715730	754530			P60843;P10630	114270	107770	108530	110430	109720	104610	111260	98803	95850	72005
11_GL0113823	202800	209300	198440	219800	201640	183870	193650	175410	184760	176060			P60867	21114	23130	15095	18934	20205	17003	12755	18229	20335	19285
1-1_GL0114159	NA	34957	32192	40815	19164	34014	27265	41013	29769	25486			P61022	17384	15665	19798	24002	23504	20958	17498	18283	17540	14223
1-1_GL0114166	294530	270590	305810	297380	276080	282840	267740	273030	274350	258760			P61161	41476	14674	112500	1344.9	13520	7308.4	8880	3451.3	7254	3221.4
1-1_GL0114553	218030	207530	203750	225660	206230	210620	217260	212060	234280	204830			P61358	18464	17128	25142	19533	20990	14857	NA	15716	24471	16434
1-1_GL0114862;S-Fe2_GL0161391;4-1_GL0044898	195030	157940	178280	172370	191940	205820	174380	202310	191400	196240			P61750	24717	46837	54403	54048	64676	NA	36684	59611	30498	65991
1-1_GL0115232;34_GL0017243;1-2_GL0048689	257590	260570	211790	257510	258530	272760	272390	258330	244460	314030			P61804	59743	49407	47416	58942	62274	92713	54986	78886	63693	79368
1-1_GL0115270	487390	499830	482040	518410	480140	533740	523110	570350	607080	573220			P61922	147060	162470	108630	161400	148670	170720	157250	191900	188240	198990
1-1_GL0116050;S-Fe10_GL0170082	68111	92173	NA	43473	19746	NA	46502	73780	73722	69115			P61979	26976	15544	19044	17921	16822	24939	17670	NA	21295	28627
1-1_GL0116892	24495	16598	128870	17166	19927	134950	131840	124160	133520	104260			P62141;P63087;P62137	133040	106530	137210	93890	127050	121160	120290	163240	135040	166040
1-1_GL0117012	59442	71692	90163	42931	88773	53975	71549	67596	32669	55514			P62242	26478	18093	32474	32550	18145	30081	15123	31108	38526	41402
1-1_GL0117261;G1-3A_GL0125811	116290	140550	114410	123900	124610	127560	115550	142560	127870	137720			P62259	94137	170920	141950	69100	115420	172070	88867	44832	67041	154470
11_GL0117532	31054	53278	103210	95039	499710	171000	61504	52267	274170	150810			P62264	45443	38438	26246	31203	44952	38567	31511	39934	33535	44360
1-1_GL0117667;S-Fe10_GL0031034	193040	177260	135330	161290	26511	92598	207540	166390	191380	23651			P62270	130880	135820	114630	134310	132430	141870	138400	118750	121710	129040
11_GL0118584	40631	37632	32290	38899	32749	39799	44347	40388	42475	41811			P62305	4567.5	4517.1	NA	NA	NA	NA	4377.2	NA	NA	NA
1-1_GL0118687	142040	186790	215180	165340	175460	117840	114120	128600	89427	82581			P62309	89664	65512	77381	90996	98548	NA	85814	87981	67061	73588
11_GL0120222	389290	369700	343570	348380	364530	387610	331290	351790	353920	375080			P62331	10166	10890	9444.7	11739	12385	8170.5	12715	17198	13445	15365
11_GL0120543	176610	174970	172690	178660	186130	206820	206700	187160	193870	193380			P62702	49967	55836	37490	54834	40374	48201	50121	35290	41072	31992
1-1_GL0121030	14767	6158.7	31163	121040	8298.3	6458.7	10387	1854	10776	19232			P62751	81703	128930	121760	94030	99318	133040	125600	134940	156330	291100
11_GL0121511;Group2-7A_GL0140882;G1-4A_GL0058602	285810	302990	289420	267690	254700	302000	303850	296050	273730	308880			P62806	2042800	2024800	1938300	2076900	2053400	2212000	2101200	2019000	2104100	2101500
11_GL0121666;1A-dyr4-07_GL0054274;G1-5A_GL0050443;3-6_GL0057763;11_GL0142670;G1-1A_GL0065512;1-8_GL0113440;11_GL0004982;1-1_GL0097553;34_GL0077571;4-2_GL0043514;2-3_GL0102263;Group2-8A_GL0131983;Group2-8A_GL0084398;Group2-3A_GL0133614;7-6_GL0012399;G1-1A_GL0023663;8-4_GL0050445;G1-5A_GL0104094;5-1_GL0005641;29_GL0059643;2-2_GL0106418;10_GL0025680;10_GL0020849;4-1_GL0045516;G1-7A_GL0058707;35_GL00…	253780	236160	231720	250700	231110	244200	258050	253340	250880	282710			P62821	42875	64123	70433	40140	63597	42637	41127	72381	46543	62526
1-1_GL0122179	64840	59366	61572	62052	67597	73173	70713	68320	72414	81776			P62827;Q61820	37551	44678	45265	42125	26967	43511	39010	59937	37209	56613
1-1_GL0122934	539470	540080	536370	543510	531600	521460	543190	540210	539970	576190			P62830	58851	34325	81237	71958	64297	47653	46506	45262	22563	29855
1-1_GL0123182	28238	22479	24873	22447	22709	1858.5	21896	19504	24250	17263			P62835	31817	34918	32889	31330	35197	33654	32065	33418	29200	34948
1-1_GL0123183	56083	53383	64452	56272	57788	61280	57260	59511	57565	67669			P62849	NA	18545	18689	21733	34017	54851	NA	21218	28897	6478.5
1-1_GL0123184	96713	96624	86724	89655	103480	91488	99414	107750	104050	105310			P62852	40192	42783	36861	38788	35880	31593	45432	44648	51106	40673
1-1_GL0123231	176020	156010	162250	171580	170910	179180	160730	162420	172400	189570			P62858	48661	40056	43652	49644	54225	51128	44175	51336	47389	54821
1-1_GL0123826	457410	457020	446920	447960	446670	476930	420470	466870	467600	512290			P62874;P62880;P29387	66005	124790	96730	95030	108350	63321	53042	120590	68753	110730
1-1_GL0123934	3663.5	5559	2538.6	2396.8	1612.2	2457.4	6515.2	4150.2	7942.4	292.08			P62889	45843	43129	43197	39485	60649	44759	47454	60673	51387	43497
1-1_GL0124304;1-3_GL0119037;54_GL0001050;MH-6-4_GL0136450	1306700	1309700	1174700	1362900	1400000	1337200	1334800	1195100	1249700	1281200			P62897	404000	391350	408550	375960	365450	371950	403190	339240	339840	397930
1-1_GL0124334;G1-8A_GL0058816	93719	84361	79311	112890	98537	103260	114420	119170	112490	120420			P62908	198570	186240	189590	182130	175310	200890	187700	183940	180740	225780
1-1_GL0125402	343670	313350	638650	546030	461650	720510	533040	799640	834860	634270			P62984;P62983;P0CG49;P0CG50	1053400	1048700	1021600	1067300	1063400	1131600	1102100	1103800	989570	1189200
1-1_GL0125549;G1-1A_GL0096895	132400	101170	89477	93201	88885	121050	90562	103930	126860	131390			P63017;P17156	542490	502200	536120	513070	525050	535480	538600	546450	546490	534130
11_GL0125565	951050	1052100	1004600	1060100	959720	934910	947400	1027100	1010000	1040300			P63038	94329	73358	102790	107580	87668	81536	78830	93148	78022	76277
11_GL0125782	301610	289580	335400	334680	306980	299980	322930	294140	299820	313430			P63082	NA	88200	68887	NA	NA	NA	NA	NA	NA	NA
1-1_GL0126511;S-Fe20_GL0042994;S-Fe2_GL0030158;47_GL0058974	64737	58598	68606	75313	61584	48341	55167	63939	58857	70037			P63101;P61982	331770	294230	291570	303260	277720	316630	327400	309040	289880	293310
1-1_GL0127751	87820	NA	14736	NA	42731	41100	35596	30799	30369	NA			P63260	2296700	2233600	2270900	2329200	2315100	2255100	2308700	2336100	2165300	2192200
1-1_GL0127858	145680	150180	151960	123580	150900	146340	121710	150740	151240	177080			P63268;P68134;P68033;P62737	2181800	2364100	2161200	2320300	2194900	2302800	2236100	2340500	2262600	2206000
1-1_GL0127859	7763.3	7095	6884.6	10934	15943	7001.1	8919.3	NA	17940	12252			P63321	49255	63618	64138	54797	50740	56259	51760	35371	43881	36563
1-1_GL0128445	920070	919820	889000	917080	927570	904780	947140	1050800	971420	985010			P63330;P62715	33969	37517	13255	27054	32263	40571	40501	30318	38928	38203
11_GL0128752	4268000	4328100	4355600	4404100	4512600	4545000	4130900	4180400	4110600	4063700			P67778	33987	23163	21089	24362	20785	20482	20582	23873	27936	49414
11_GL0128753	96469	104540	102030	106720	112610	119520	120710	118750	122790	117310			P68040	97539	92042	104480	101010	111750	115360	112190	110380	100200	132810
1-1_GL0129407	233110	189850	223160	219420	211210	232040	196760	204020	243370	230350			P68254	29323	23087	22754	23925	NA	NA	NA	NA	3497.5	4076.9
1-1_GL0129836	61887	69724	55013	64302	59556	66599	61731	57110	61092	37757			P68372;Q9D6F9;Q922F4	193810	202300	189830	188760	205210	199420	173090	166760	173840	183960
1-1_GL0130386	132710	109440	106420	106010	106310	160110	128710	115370	126100	122220			P68373;Q9JJZ2;Q3UX10	37168	35944	52178	56047	39885	25656	20022	20502	29920	30436
1-1_GL0131296	153760	155810	151860	155650	168820	158890	158970	149480	159260	169270			P68510	10393	36322	20036	11018	22132	1880.5	27465	32831	34298	34266
1-1_GL0131432	449540	425690	455350	391100	457330	441910	445920	467780	444240	501190			P70158	109730	104300	98462	101660	104310	107830	110590	103840	116280	87400
1-1_GL0131480	156130	NA	99275	93246	52076	58535	209890	94118	167630	57995			P70296	82907	75134	73311	67365	64223	70931	85589	91350	73646	76333
1-1_GL0131531	103860	110740	119420	148540	150390	98198	144040	128650	130520	57383			P70412	3199500	3181000	3213800	3222500	3021700	3125600	3188700	2979400	2979300	3148800
11_GL0132807	106640	108260	105320	122650	67723	116930	85607	98671	108250	112510			P70441	155940	149250	148360	168130	173210	139510	160590	157590	165690	176100
1-1_GL0133105	37916	193050	127570	124020	85843	74732	129700	67340	63219	73492			P70451	226730	197390	184120	216120	203440	202320	60160	144300	237060	72282
1-1_GL0134047	212270	210690	201880	197740	220470	221920	232420	228360	229690	243050			P70665	138650	137780	117900	122140	133910	134680	138500	154910	145020	165570
1-1_GL0134181;17_GL0042801;S-Fe12_GL0013246	278970	275060	251320	283550	291500	280560	306510	321460	304030	323220			P70677	184320	174460	199670	183990	168830	179820	195750	193950	151820	186780
1-1_GL0134521	298760	299890	369840	367360	308940	376910	340630	326540	281130	303970			P84078;P61205;Q8BSL7;P84084	537660	554760	534990	486610	469030	556160	458860	520060	428940	504710
1-1_GL0135073;6-6_GL0125700;7-8_GL0069765;5-6_GL0090238	142850	102190	238520	240300	175580	145180	167310	226590	156720	130910			P84091	1801500	1675400	1663300	1597500	1435600	1809600	64351	1592900	1573900	88620
1-1_GL0135235	390310	378370	416940	402440	411240	413270	432580	373080	402770	396170			P84099	77336	68977	92458	26581	84150	112750	74682	81637	96931	89216
1-1_GL0135247	37960	36987	40880	45369	36660	34983	43465	47774	45943	45593			P97300	74261	84547	89560	104270	105790	94725	87230	99150	104160	105030
11_GL0135547	126270	95573	68175	109560	103150	92282	96709	95421	94519	115980			P97384	603530	592790	619520	647540	634200	620580	589850	626880	584920	604790
1-1_GL0135553	578600	541330	514930	584930	566510	589450	589220	551300	582610	651040			P97429	1996100	1941900	1921200	1994600	1988400	1962900	1958100	1920400	1911900	1990800
1-1_GL0135577;5_GL0164578	169160	134020	121130	136500	135800	161740	118470	172330	144060	179600			P97435	103010	97130	102880	108560	109430	101120	103560	108720	107490	112460
1-1_GL0136144;1A-dyr1-07_GL0036169	153140	152420	156930	104380	141530	131050	143240	161090	157820	178730			P97447	45946	47742	40369	49872	42660	51769	43827	42873	47540	50043
1-1_GL0136841;MC-6-4_GL0039328;S-Fe17_GL0096003;MC-6-5_GL0002992	19981	18266	16197	19403	23116	18633	20957	20354	19976	21234			P97449	6826300	6753800	6689100	6985100	6631200	7020200	6991100	6925500	6678700	7016200
11_GL0137061	108950	102590	101020	96057	104400	117670	125020	124940	126780	131370			P97742	85800	85768	103920	78056	70109	89988	82775	113520	106590	83653
11_GL0137082	124550	122000	118680	142020	128920	119270	140600	125610	135650	120810			P97792	105360	125060	117120	127810	127100	NA	139390	56763	80717	NA
1-1_GL0137416	158480	151240	180610	178240	166470	170960	163200	156210	169400	156250			P97807	96106	85889	91708	94656	103830	113630	112950	111370	105310	108220
1-1_GL0137633	244280	226880	241730	225750	226770	238260	226850	232750	226430	236690			P97821	145140	156320	154070	155750	162870	169140	141870	162120	170930	171250
1-1_GL0137848	12476	12043	11055	16091	9173.7	16449	14481	14288	20959	15273			P97864	NA	1508.6	1200.3	NA	1551.7	NA	979	NA	2171.1	812.14
1-1_GL0137880;MH-6-2_GL0004454;MH-6-1_GL0021820;32_GL0126562	150060	136910	129210	124870	132710	139120	121130	130300	137540	186180			P99024;Q9CWF2;Q7TMM9;CON__ENSEMBL:ENSBTAP00000025008;A2AQ07	84981	6339.6	76089	71994	118440	10521	6602.5	NA	7635.7	9485
1-1_GL0138491	2816700	2760800	2744200	2889200	2753100	2828900	2823300	2791800	2796000	2789300			P99026	146500	108680	140100	154160	172250	156910	144030	153200	161520	168130
11_GL0139065	294480	264520	266040	272720	281140	296530	290110	361430	376000	401780			P99028	NA	NA	47084	36999	34340	41648	NA	41561	34548	25740
1-1_GL0139144	30578	9464.5	20076	27914	29948	31549	24644	26753	41428	27633			Q00519	33520	19581	35703	32161	15566	24055	23471	25486	19514	23961
11_GL0139318	349760	393210	360900	367180	376980	334360	332200	374740	297640	310530			Q00896;P07758	663860	642800	624570	631320	637860	657120	653320	679660	713920	707720
11_GL0139331	197390	202380	211900	200270	198590	213620	208000	216980	186150	224470			Q00897	376280	376250	372030	386160	350680	344080	377070	365790	355410	367690
11_GL0139734	80032	91645	84692	90657	86873	92891	89811	91017	89002	67695			Q01768;P15532	320130	298620	304820	295400	283320	312430	266440	285140	317300	368700
11_GL0139858	437670	375690	461260	470840	416870	494530	465400	435260	461890	439190			Q01853	210090	209960	200590	216740	255230	194730	218090	187170	167490	185870
1-1_GL0139949	124080	130260	124220	124970	120150	152040	131300	138970	159340	177810			Q02257	52300	91467	57775	16814	127130	46952	68549	28009	68525	22310
11_GL0139961;6-3_GL0062463;2A-dyr16-07_GL0071629	865520	680950	612880	723980	402700	614440	629600	314950	443940	330120			Q03265	964730	870260	874330	966560	967140	987510	1021300	969320	1013700	1010800
11_GL0140125	31633	24645	20005	27299	32731	25942	26443	21010	31598	33379			Q03401	131220	139440	110220	124380	121820	120170	122770	140830	137400	140330
1-1_GL0140275	766490	585940	623420	697250	721790	683650	708730	623490	664400	524550			Q03404	238340	227690	222780	228360	237780	237830	231580	248110	235950	256000
1-1_GL0141547	626110	729170	707420	741510	674910	649420	683230	672540	643090	683590			Q03734;Q6P4P1	39139	38010	32486	30345	33250	32006	30938	33977	36768	37336
1-1_GL0141548	332260	326390	324800	350940	327690	342570	353550	378750	338340	356950			Q05117	15010	16882	14657	13121	10296	13486	12830	11587	12686	13959
1-1_GL0141549;S-Fe9_GL0216320;S-Fe9_GL0104873;MC-6-2_GL0032211;4-3_GL0000037;1-1_GL0081980;10_GL0033898	271330	282030	326410	319890	263710	265410	262750	258000	236730	231040			Q05144;P63001;P60764;P84096;Q8R527;Q9ER71	253270	241910	214150	268300	257070	262870	255970	255470	268840	297120
1-1_GL0141625	NA	10812	12654	11920	10633	8725.8	2674.2	7223.7	9139.6	NA			Q05920	70445	51857	40584	55813	45074	53857	65903	62834	65616	57570
1-1_GL0141631;G1-1A_GL0026944	102040	356.06	468.02	425.87	466.64	598.17	848.38	215.24	986.72	667.58			Q06138	23351	189170	26186	51087	110990	224110	12525	18902	141890	211370
1-1_GL0141777	324110	312090	333370	336780	321220	322600	307370	329600	330010	383770			Q07076	410000	403970	371170	368930	351690	338820	395660	414540	404640	375180
11_GL0141839	26239	49685	30131	32479	27467	34593	32032	33873	30525	27207			Q07417	161200	154210	145220	135940	146370	150770	123280	153110	136360	136890
1-1_GL0142511	215910	217220	210390	218850	223820	231510	218540	214440	221380	235340			Q07797	327580	340050	329000	322830	325320	326910	314530	335300	316700	335720
11_GL0143116	248000	205540	238680	187170	210230	200450	214670	197770	225790	250690			Q08189	353310	343390	344270	341820	356180	363800	347840	335020	342030	360390
1-1_GL0143497;Group2-8A_GL0231745;Group2-4A_GL0039847	339680	246370	297700	222160	221470	245810	312230	267370	258210	259910			Q08509	78190	76281	79530	38115	76843	83391	74085	79839	77017	76668
1-1_GL0143705	176880	142760	167280	163110	183330	164990	179790	167780	152650	141000			Q08731	727270	717840	741940	757860	669700	801340	676080	762560	748600	859660
1-1_GL0143854	55931	44291	46842	36737	42674	43876	46446	42943	51175	81904			Q09199	42550	43272	40595	40800	50507	43135	46542	40658	30070	51791
1-1_GL0144133	89773	112700	110320	118180	112780	120540	110200	123940	109250	169730			Q0KL02	389210	530930	484240	551740	478880	561020	562140	552120	578300	547730
1-1_GL0144661	98132	87310	83772	99287	98000	95971	100360	77640	123480	110020			Q0VG18	84621	80880	87200	103740	110410	92766	90398	95651	87103	95851
11_GL0145605	31903	12080	19569	16013	8110.5	13140	15304	8692.4	8215.8	15135			Q11136	1682100	1637600	1753200	1782300	1725100	1776400	1735200	1704100	1733200	1810200
1-1_GL0145833	307880	279560	276760	292870	289660	315750	326310	313860	317810	338200			Q3TD49	732160	773140	549140	902850	886890	947220	919810	791750	808580	970300
11_GL0146124;38_GL0076358;MH-6-3_GL0061014;MH-6-3_GL0025839	33790	323920	325680	326780	45975	45019	349630	372600	327790	23720			Q3THE2;Q9CQ19	53992	77340	76459	55564	61694	62139	54527	77357	73947	79904
1-1_GL0146495	641290	654160	563790	646240	654960	658300	653570	704290	684260	682200			Q3TIW9;Q8BTJ4	1684400	1582100	1711300	1662800	1656700	1633000	1792100	1864200	1570500	1749500
1-1_GL0146614	129140	101040	117560	123890	102670	135180	125440	106570	121210	124250			Q3TMQ6;P97802	784260	773280	742060	780160	838420	846030	841810	808440	808890	902340
1-1_GL0146646	74212	60259	53646	72238	66154	78198	59362	56110	68315	71062			Q3TTY0	635190	616630	609870	619860	622070	628930	621330	598420	609800	609280
11_GL0147059	582920	648410	567520	644150	725600	708710	653630	830280	858760	710130			Q3UJU9	15206000	9648800	10405000	15891000	16341000	16135000	17064000	13590000	18483000	14757000
1-1_GL0147539	488980	482100	488180	530040	520720	542030	542480	543960	523640	549690			Q3UQ44	15041	10705	11816	12336	16208	15772	13429	19580	18534	12259
1-1_GL0147731	283030	280400	279660	288730	278510	309170	309040	286870	291890	323110			Q3UV17	800340	782290	740100	891150	904240	837250	825760	889750	847490	1164900
1-1_GL0148132	100850	120700	108090	97105	91141	129970	117200	117870	122080	147120			Q3UVK0	63012	63911	65186	64692	66214	81663	59423	64229	72013	77315
1-1_GL0148426	92248	93275	86457	93222	77028	89683	79260	83679	80644	104170			Q3UWA6	130330	129020	100950	131820	132980	111480	118360	142930	153340	141930
1-1_GL0148995	23161	12504	15826	21276	19205	16906	18690	15268	15360	6549.3			Q3UZZ6	115010	132130	117200	90028	97690	96257	97880	80959	66831	80445
1-1_GL0149091	59361	54875	57020	60480	59209	68190	58769	60973	59061	68853			Q3V0K9;Q99K51;Q61233	160660	153250	154310	163910	173950	183590	177640	158940	179410	186950
1-1_GL0150115	45755	NA	50526	34396	30150	28609	33924	33901	18221	24483			Q45VN2	3465200	3639100	3381200	3863600	3815500	3669200	3543200	3598800	3590900	3665600
1-1_GL0151547;1-1_GL0072113	3878.1	6964.5	NA	2032.9	NA	2189.9	36559	770.85	3572.2	3873.8			Q504N0;Q6P8K8	975120	988360	965760	1012300	991390	937220	984590	1013200	981020	927700
11_GL0151721	79458	86346	169400	71221	39544	132240	65418	242040	44815	134630			Q571E4	56812	33451	42569	45136	53805	41396	56771	53526	52221	44531
11_GL0153043	29362	59876	21265	71517	64776	70829	67324	88811	87317	24205			Q5BKQ4	191520	164940	162870	166140	191040	186180	182650	162300	186810	210170
11_GL0153063	309910	318880	321200	331310	348960	327780	339340	355980	351730	345100			Q5F226	81740	78422	55743	54235	103780	68942	70486	91768	103300	92093
11_GL0155660	25828	28194	30239	32198	38627	36281	39717	35562	22272	14527			Q5FW60	33065	27967	27283	31093	24435	21590	31094	30713	28914	31377
11_GL0155661;6-7_GL0104531;1-1_GL0082828	126460	139830	137960	149130	122530	145490	143370	124150	125460	160320			Q5M6W3	200620	218500	198570	174670	158410	167480	122590	171960	192660	184440
11_GL0155826	34348	44992	33632	29311	40053	39093	28109	49924	31030	31538			Q5SSH7	22585	24958	28124	29719	23829	32285	37270	39187	39160	41663
11_GL0155893	94277	98573	83970	103040	82390	98316	98463	111280	119470	103170			Q5SYD0	36274	34540	19791	41896	34501	37681	28977	63101	27815	55438
11_GL0158489	616590	660090	560750	722750	496660	674070	511660	484870	510580	502230			Q5XJY5	33956	59018	80056	293420	23302	39716	59909	34013	67509	18759
11_GL0161434	1118100	1058800	996320	1252900	1208000	1209900	1155500	1128400	1105700	1200000			Q60597	19371	11030	13809	21583	16764	44569	22224	37512	23210	44849
11_GL0162060	140120	105500	105090	131150	87594	96378	86950	61637	33780	89765			Q60604	32289	26192	36991	46854	47920	48110	29632	38619	33507	41591
1-2_GL0002789	223920	207590	192840	205190	196800	212220	211350	222930	211430	213750			Q60605;Q8CI43	123210	129800	115930	120720	118310	116600	128050	128560	125920	140180
1-2_GL0005357	130610	134810	128230	112080	134430	91154	131800	79085	120260	158930			Q60692	69736	77293	70356	68047	92451	77729	74767	83373	84764	78908
1-2_GL0005685	371070	364930	373250	361350	366460	365530	365210	365840	383600	393050			Q60817;P70670	75854	71290	62519	73329	44056	48107	109060	54403	135580	98161
1-2_GL0009417	NA	64599	89641	102680	80829	73071	61866	76396	70872	85534			Q60854	2378900	2372400	2434300	2478200	2403200	2573600	2401800	2405400	2364900	2455600
1-2_GL0010842;5-8_GL0023725;1-8_GL0094007	46728	45581	41421	37289	51844	45032	35471	49804	46282	43677			Q60928	107140	99002	105160	108820	114600	118230	114610	126720	134010	131390
1-2_GL0016841;MC-0-1_GL0059229;Group2-8A_GL0061048	128430	150090	83548	50090	41585	88544	78788	96567	114220	121670			Q60930	603580	648100	660470	623350	585120	634600	604330	605840	608220	662000
1-2_GL0016953	3107600	3125100	3125900	3214400	3204700	3166100	3177400	3218900	3137900	3292000			Q60931	362030	374790	391580	383650	378830	420830	386240	400770	416030	425070
1-2_GL0017647	55831	43979	44382	61389	56653	53773	56773	63754	43935	56157			Q60932	621170	615480	586160	576720	542710	731450	602530	730730	779780	803230
1-2_GL0020540	136660	121850	111240	121650	116350	117680	128160	139620	141970	130990			Q60997	10194000	10343000	9924200	10086000	10355000	10084000	10263000	10346000	10113000	10879000
1-2_GL0020777	146470	142070	86609	142030	152240	148730	158440	134790	132530	143780			Q61062;Q60838	179530	137560	234270	252640	230630	247950	199650	189300	218420	191430
1-2_GL0031972	33557	37395	28168	26633	30562	30083	32628	33768	28832	36377			Q61087	21080	9260.8	9440.8	108340	13003	4228	9026.9	2091.9	4341.2	4018.9
1-2_GL0032701	101800	93439	123300	128870	100400	112840	101020	121770	83689	91616			Q61171	35946	39710	44323	29433	35026	38045	33722	33804	35753	31861
1-2_GL0033820;8_GL0141891;S-Fe3_GL0202097;20_GL0139225;1A-dyr2-07_GL0018295;26_GL0008793;S-Fe7_GL0269252	37618	36467	54669	43823	29999	37552	33572	31115	33913	28043			Q61247	73971	75078	93800	83692	73781	78814	99171	83030	97584	104060
1-2_GL0038806;1A-dyr4-07_GL0102309;11_GL0008659	58235	51011	45399	47278	70085	48389	55944	60153	58243	60140			Q61391	1226000	1187600	1214600	1199100	1188300	1251000	1202800	1206800	1188400	1096500
1-2_GL0041485	163470	171250	179380	141110	168020	170460	194340	207850	198950	212180			Q61425	121340	123960	141860	141140	115710	129570	138520	141920	122970	120170
1-2_GL0041958	27701	18509	14553	22628	17352	7532.5	10667	20091	19573	15374			Q61598;P50396	1118500	1090500	1071700	1072600	1113000	1239500	1090800	1144100	1117100	1416900
1-2_GL0042023	216680	233250	175580	343380	217790	243930	187830	251870	237300	234370			Q61847	3295400	3289500	3220200	3343600	3357500	3301100	3242600	3389700	3346000	3542500
1-2_GL0042922;1_GL0048916	55324	56595	67783	51569	62400	54802	61101	71958	63259	77654			Q61937	99715	137890	NA	99225	119630	95461	109440	105120	117250	120430
1-2_GL0045795	NA	325730	105230	64453	6008.7	165870	208620	475300	372810	256900			Q62087	95063	114890	105350	115090	111500	153320	92698	83736	76209	103660
1-2_GL0046009	58145	55720	55163	52180	37143	66949	53838	58956	52105	63919			Q62261	80748	60541	155870	NA	141790	94533	117770	70046	90020	103300
1-2_GL0046791;S-Fe10_GL0131129	108710	120160	115090	109100	128160	109330	92706	118080	100090	95808			Q62395	630070	632460	702930	637260	621890	618070	641640	667130	660930	673560
1-2_GL0047207	67759	89639	88572	89655	79555	78599	92605	102310	90144	80997			Q62468	588820	550180	538940	581380	597630	573930	601520	619200	619590	662790
1-2_GL0047570	12631	13291	13044	16276	16000	11890	NA	15313	14313	NA			Q62470	95302	60303	61069	110290	61224	72559	73058	57132	115710	72370
1-2_GL0053997	137850	123070	138960	131280	143490	140300	145220	139220	143860	160580			Q62471	130520	121400	149850	119900	136950	124360	128700	113640	162490	148100
1-2_GL0055961	33013	48846	31792	35296	40208	40866	43651	36565	45887	37250			Q63886	65402	75963	80417	94836	91918	75515	97084	72994	83501	66450
1-2_GL0056317	246260	180740	180920	202590	182940	307920	189230	238510	211430	192370			Q64133	553820	573930	618320	542290	557650	565980	539290	602590	617580	605880
1-2_GL0056607	38022	40172	35789	35955	34156	35287	34118	48988	42591	48763			Q64191	85212	78360	88025	85917	74010	84841	78249	75784	79845	90291
1-2_GL0059967	11845	11475	12445	9456.3	11560	10957	14137	12335	12918	12706			Q64277	256420	250200	264480	273740	262810	257010	278430	247450	264900	230050
1-2_GL0059978	114540	115220	112320	104690	113650	127660	93286	116670	100230	107710			Q64285	161680	160590	160080	157710	172560	162480	156540	179960	179060	157690
1-2_GL0061797	303130	303820	310080	318650	301140	291240	294000	331020	342790	296420			Q64299	47033	45951	46485	48442	55444	47562	57477	50306	46704	33479
1-2_GL0062480	108340	110180	95194	116850	100330	139780	121220	123220	113990	136900			Q64444	252420	247290	244760	248040	231200	268700	245660	255270	268360	287110
1-2_GL0067118	34377	39458	61355	41275	54948	55078	57581	57130	43528	49861			Q64521	286530	296880	283570	304330	285350	286520	297450	285970	293170	293140
1-2_GL0072935;MH-6-1_GL0132097;MH-6-2_GL0010405;S-Fe9_GL0077283	82287	89319	83779	86131	87390	70229	87238	65681	73219	51324			Q64523;Q6GSS7	0.90838	0.85178	1.3597	0.72594	0.9626	1.213	0.4075	1.1304	1.1735	1.2672
1-2_GL0077649	22413	23790	27206	15144	17360	26074	38902	22801	26209	28787			Q68FD5	88966	89360	79276	97487	91110	86900	73396	90120	94096	94095
1-2_GL0078660	750810	725650	744730	743410	753270	755530	768810	731860	748600	721140			Q6DYE8	802230	804760	823940	842530	825220	805180	814980	775380	756190	709280
1-2_GL0080622	43105	38374	41794	67191	31052	47757	36775	42016	44631	32297			Q6NSR8	127610	133960	144670	136150	175480	141610	172820	173720	163480	197870
1-2_GL0082121;MH-6-5_GL0040014;8-5_GL0000196	153060	129020	98258	122790	124700	138440	109630	134830	137360	104510			Q6P6M7	56312	NA	51874	38254	43225	57352	51864	50595	58894	61443
1-2_GL0083818	115350	67018	93113	108180	81545	122080	99261	115200	133460	97714			Q6P8U6	7820600	7840100	7915900	7718400	7747400	7943500	7691600	7570100	7379300	7555600
1-2_GL0084271	282150	247340	259480	256740	272180	254350	252530	298440	251450	272270			Q6PZE0	90731	94149	96316	97899	85581	99528	100270	100520	92296	109310
1-2_GL0086064	312650	262330	254350	248160	225580	266830	208090	264410	262220	297630			Q6Q473	3222700	3199700	3151000	3291900	3268800	3337100	3232400	3182800	3159100	3252500
1-2_GL0093285	59233	42406	49800	53674	62131	58658	63701	57571	69827	73009			Q6T3U4	263560	221720	231000	241110	224450	242700	238020	230820	225430	209420
1-2_GL0094249	211340	197350	71595	287960	142240	252640	208450	216690	404010	196680			Q6UQ17	108820	5600.8	113640	118510	127720	99666	123980	112590	124020	101110
1-2_GL0095419	125290	148960	117500	112440	117030	109130	111590	113330	127550	117180			Q6URW6	318430	320670	300000	326930	291490	300180	314850	341900	335360	321530
1-2_GL0095952	719230	729510	737440	730320	737830	758480	732600	792700	692630	691700			Q6X893	49309	59878	58543	63752	54238	79356	57816	50086	60783	49241
1-2_GL0098312	99229	98182	84553	96471	113720	106550	117210	106310	110870	119750			Q6ZQM8;Q62452;Q64435;P70691;P17717	267110	250150	243370	251360	248890	264300	261870	264870	274780	269980
1-2_GL0098314	62131	46446	63835	56264	70027	42815	23922	65809	47411	70503			Q6ZWN5	19119	14885	25561	47309	26390	62549	19079	22809	20918	19484
1-2_GL0098677	33512	18717	50452	19597	31401	27602	27527	43390	14857	63401			Q6ZWV3	6383.6	12174	4313.5	8068	3407.4	6656	6370.4	NA	NA	6472
1-2_GL0100942	270390	206360	245630	249110	215830	305540	254900	305870	295700	287420			Q6ZWV7	44512	41506	39723	42396	40265	44489	46305	40845	42651	44602
1-2_GL0103656	22329	19136	32343	33194	23923	42493	28248	36149	48806	36642			Q78IQ7	216900	187700	167010	222160	249340	176340	206360	198940	216690	208130
1-2_GL0106009	352430	347770	336300	351010	355810	350070	325750	310710	319560	343720			Q7M758	5069700	4929500	5012700	5155500	4977100	5125700	4996400	4796200	4767900	4940900
1-2_GL0106369	2121200	1998700	2073300	2085800	2058900	2164200	2165600	2061000	2119600	2184700			Q7TMF3	15598	18702	19247	19177	18022	18780	16308	13544	13505	11626
1-2_GL0107126;5-8_GL0032106;7-5_GL0152446;7-8_GL0074757;Group2-8A_GL0042327;MC-6-2_GL0088060	349450	352750	365530	354040	322640	359060	362650	363730	362390	367540			Q7TMR0	15364	3620.9	NA	8763.3	16017	20707	10840	24299	NA	18135
1-2_GL0109440	36349	25941	28713	25044	32056	32182	32550	35070	33472	23897			Q7TMS5	45682	40498	39639	47128	37832	46592	43109	34791	42302	43042
1-2_GL0112586	10304	10726	10494	9385.6	6888.6	9098	12309	438.38	9134	841.12			Q7TPZ8;CON__Q2KIG3	7520500	7619800	7688600	7657000	7500300	7615800	7594200	7595200	7636100	7782300
1-2_GL0113032	94637	94499	100850	101430	113430	111920	61510	92909	100930	87385			Q7TSG1	265780	30937	116760	167180	137200	95422	27829	47107	146260	14689
1-2_GL0113170;G1-5A_GL0020141	24452	27708	35406	26383	27747	32645	32576	NA	39724	161900			Q80T03	118190	125700	136970	122860	83787	98960	86126	129680	122440	137980
1-2_GL0113171	632190	653260	653010	695700	719750	661240	748300	690750	682900	782040			Q80VA0	20517	21153	8695.5	19262	1122.4	23267	18118	15035	21852	16900
1-2_GL0113636;MC-0-1_GL0113705;MH-6-5_GL0055981;MH-6-1_GL0066174;MH-6-2_GL0057252	109560	129330	117520	185640	109870	113320	86950	125890	135780	99691			Q80X90	901530	894390	869590	886040	945650	925430	953620	945110	975260	1059100
1-2_GL0114244;4-6_GL0051640;3-2_GL0000386;3-1_GL0075579;1-1_GL0144691	497240	514860	523690	485950	470520	451510	470780	447630	494810	490960			Q80XN0	133740	137200	142340	131030	126450	144920	150050	81499	91538	105150
1-2_GL0115398	98255	98740	106050	59568	53359	50350	46202	86553	113690	41817			Q80Z19	10504000	10369000	10298000	10277000	10301000	10621000	10308000	10425000	10563000	11104000
1-2_GL0115399	131490	105210	119800	112180	116910	108550	122510	122180	134700	174240			Q8BFR4	229400	224720	235990	213740	242240	231780	223960	209060	242340	236920
1-2_GL0115428	260910	238530	259210	206430	160460	238850	134990	210690	233200	295190			Q8BFR5	75463	70846	77488	73285	62282	68550	70779	60237	65795	64752
1-2_GL0115758;Group2-8A_GL0085366	76729	86203	85365	76778	81371	79797	85984	81228	81299	89846			Q8BFZ9;Q91X78	19266	18225	18011	22507	19778	23175	17933	28667	27736	28499
1-2_GL0120539	68010	74082	55995	69422	9413.1	60096	46189	72267	76273	88077			Q8BG05	14146	19958	25398	22989	19675	10376	17939	21585	21341	24158
1-2_GL0124113	417310	474740	456240	470340	456850	475930	516850	471410	431100	500920			Q8BH95	44268	45232	57088	54540	48745	41624	51509	26546	47264	38877
1-2_GL0125028;1-1_GL0014250	117680	110080	76034	88648	104780	81212	103070	111150	111140	117090			Q8BHL4	111030	120700	122490	125260	114340	125870	124140	128200	123880	128950
1-2_GL0126345;1-2_GL0125347	102230	121070	111730	116550	108450	137760	91792	114030	101430	126700			Q8BHN3	27369	28655	33892	39037	36536	39333	30897	44751	32665	34550
1-2_GL0126346	170100	68331	93608	123630	110390	86103	55732	135540	NA	194830			Q8BJ64	55105	51774	52619	64432	48480	46792	47235	57365	50518	56507
1-2_GL0126797	278340	304460	277630	323100	383060	271040	256090	303120	238650	276040			Q8BK48	409480	391990	411730	413350	368950	402410	379920	408510	396800	390720
1-2_GL0128995;38_GL0071201;Group2-3A_GL0005562;1-1_GL0104563;MC-6-2_GL0075820;8-1_GL0083732;7-8_GL0086080;32_GL0120672	1133100	1256700	1185700	1159700	1136900	1193700	1244600	1141100	1165900	1213400			Q8BM96	164180	115620	129420	174760	88534	147990	111430	NA	104880	57244
1-2_GL0129193	61025	59974	59062	66734	76269	65482	65110	62963	72983	58824			Q8BMD8	52305	52933	59385	54753	46797	55618	54564	64115	39437	54761
1-2_GL0129635;5-5_GL0127696	167110	127300	112690	141750	136800	81255	108980	51069	174180	179990			Q8BMF4	20893	47402	33121	21343	37030	38626	40015	24270	13655	21144
1-2_GL0129656	61052	66690	62765	53567	52982	58948	74664	64031	72384	71709			Q8BMS1	116280	108630	118890	119860	112570	118720	123180	111750	100900	130290
1-2_GL0129659	185880	171230	173710	170800	129860	200680	143200	196060	146970	196730			Q8BND5	117900	105770	107190	115520	125840	107910	124940	133260	137260	116420
1-2_GL0130010	166500	170790	242030	246790	177530	160530	177390	159230	151000	124540			Q8BNJ6	2056000	1867700	1935100	2056400	2040500	2103200	2153300	2267300	2243100	2316700
1-2_GL0130912	169410	166230	157990	171950	172570	145220	167670	166910	166300	153320			Q8BSY0	971900	1116200	855550	802420	839150	767020	874530	637080	38677	567510
13_GL0007091;5-5_GL0093836;MC-0-3_GL0029057;MH-0-4_GL0087531;23_GL0048466	107930	112720	112100	89980	72557	105130	98649	85902	158550	109470			Q8BT60;Q1RLL3;Q9Z140;Q8BLR2;Q0VE82;Q9DC53;Q8JZW4	171040	170960	160990	161170	168900	164310	172430	186580	176860	186680
1-3_GL0011727	604180	563360	497080	576420	571470	623080	538580	631670	584540	628570			Q8BWT1	68318	65275	60663	72218	66975	55937	43240	78772	88858	73773
1-3_GL0011731;MH-6-2_GL0050618;3-5_GL0053195;20_GL0090887;1-1_GL0020214;S-Fe8_GL0232913	24454	36748	45411	37481	45506	42651	27262	32142	37505	45699			Q8BXK9	16049	33710	35959	38208	21592	29959	28942	26147	27858	24241
1-3_GL0015145	393690	341330	324570	328130	265940	394090	298390	299780	363000	408700			Q8BZ64	1633100	1572100	1309900	1195900	865820	1708800	1105900	1272100	1324300	1495200
1-3_GL0017605;3-3_GL0086338;5-8_GL0107180;8-5_GL0085606;Group2-7A_GL0014189;S-Fe2_GL0094361;7-5_GL0192219;MH-6-5_GL0047955;MC-6-2_GL0021972;Group2-6A_GL0031804;3-4_GL0027057;MC-6-5_GL0079780;MC-0-1_GL0048719;G1-6A_GL0074484;S-Fe20_GL0113895;5-7_GL0056912;6-6_GL0013566;5-7_GL0081956	77709	61616	93860	90364	78791	95534	87685	68189	84049	80352			Q8C052	130600	129950	129780	144550	154380	132030	132340	163560	124890	146770
13_GL0028689	33052	26743	25623	28239	31593	33499	28802	34405	35236	33971			Q8C1P2;Q8C1N8	5791000	6238300	6563700	6610300	6214100	6817600	7620400	6127600	6318600	7117000
13_GL0030246	610830	582270	594630	615590	567980	606420	639860	629810	646690	595300			Q8C3K6	249560	283470	324770	305970	318420	286660	326600	370370	308630	340610
1-3_GL0031323;13_GL0004268;1-2_GL0043599;23_GL0065033	60497	56825	56675	51711	56230	56661	56628	64201	65242	65149			Q8C6C9	2383200	2415500	2430800	2576100	2454400	2462100	2389200	2152200	2173600	1981600
13_GL0031459;S-Fe7_GL0291283	557730	495030	564950	558040	541930	595380	571150	595950	619740	710560			Q8CAQ8	28556	32144	40843	42495	22875	28638	31872	29492	29780	26413
1-3_GL0032164	65812	57181	51911	43599	47778	62059	48099	66902	57984	69953			Q8CCH2	51948	79905	69889	54548	85674	99406	50574	32144	56670	21160
1-3_GL0043265	138960	112050	126140	133140	126270	122510	129440	122860	115140	89701			Q8CGP2;Q8CGP1;Q6ZWY9;Q64525;Q64478;Q64475;P10854;P10853	866320	796680	790180	798210	786150	696940	794260	779390	701900	634070
1-3_GL0044776	326640	303450	311420	302830	320840	321470	313110	318510	312940	367010			Q8CGU1	286280	276010	276080	258430	300290	273760	258270	259200	307270	294260
1-3_GL0050200	105050	72429	92694	91255	91583	90344	95506	105290	113430	101370			Q8CHG5	446140	418270	32649	467320	424150	447510	420590	494150	476480	444470
13_GL0050784	71663	77493	60561	78685	86606	93723	76792	78359	87219	93934			Q8CHZ9;B9EJ57	482740	396810	451760	467680	NA	513670	494350	505930	442310	449300
13_GL0054975	235350	215090	208190	247250	243660	235890	204410	242920	251920	236580			Q8CI94	NA	45533	44585	52880	39270	NA	NA	36043	54162	48950
13_GL0058869	173800	172300	119050	166260	155350	172830	213520	201560	244150	207040			Q8JZM8	22846	21719	18831	15805	18912	21705	22876	18904	23032	23494
1-3_GL0073849;2-2_GL0076275;1-1_GL0087344	88341	73783	55176	56878	82831	90519	88097	96385	87584	90820			Q8JZQ5	349860	340150	360150	354340	322540	358680	343540	373110	350740	386370
1-3_GL0081464;MH-6-3_GL0042215	15211	12363	33257	5419.9	18371	14395	21588	4326.5	26230	18129			Q8K0C5	60783000	54959000	55812000	60529000	60862000	62557000	62413000	62337000	63862000	65686000
13_GL0082481	40184	33019	32560	34730	41788	40804	42700	26292	25609	31367			Q8K0C9;MC-0-1_GL0005540	377910	393100	355330	363190	376580	368270	372320	350490	368700	372900
13_GL0084008	268660	251690	275790	283340	266180	271800	235380	191870	181000	157740			Q8K157	28804	28304	25356	27146	33727	33582	27478	28504	30190	41776
1-3_GL0084454	75586	77138	88986	91954	89855	74479	71970	80303	72775	85847			Q8K183	3525.6	NA	NA	2636.7	3298.8	4088.2	3886.3	5242.5	2994.3	3617
1-3_GL0088005	28159	22210	17516	30229	27062	30644	20001	24920	23880	26259			Q8K1H9	166650	172300	170400	165120	155600	187040	145620	170190	163170	185470
13_GL0088770	890340	843870	890420	838510	847720	857460	822590	951980	868110	871050			Q8K2B3	411020	399810	399870	397930	400920	405370	377090	398410	426260	455060
1-3_GL0102532	35513	32712	35683	42305	33966	39491	31217	37710	49476	40780			Q8K2I4	10760	6817.7	12081	8641.3	12862	14150	13556	14980	14784	18142
1-3_GL0114313	93831	72973	64921	73032	67166	78304	52833	59570	59690	77079			Q8K419;O54891	1888600	1931800	1936600	1853700	1709900	1958000	1753000	1842200	1787400	1906700
1-3_GL0117225	1249600	1268600	1239600	1270200	1276200	1316300	1274800	1297500	1206000	1322700			Q8QZT1	38181	36928	32483	35226	30786	34667	40936	39437	54179	43900
1-3_GL0118280;1-1_GL0112147;Group2-8A_GL0108082;26_GL0009909;1-3_GL0031341;23_GL0123068	130830	131970	119680	141160	140930	134120	145880	142180	137820	154980			Q8R016	124450	123670	132000	127050	137580	133410	103940	125970	113880	127020
1-3_GL0119111	37884	36434	30311	29462	42195	32980	30573	48099	43236	40990			Q8R0I0	519380	497870	512460	518510	494520	522750	488290	515610	515320	540550
1-3_GL0120068	43846	17564	4044.8	40083	12923	41932	44390	45175	49685	10824			Q8R0Y6	74340	57464	56807	90581	81542	84369	91305	80322	74427	58244
1-3_GL0120131	26179	20678	26352	128700	80411	55623	22312	21362	20180	21619			Q8R143	58339	56379	48026	61703	61402	45215	45596	52347	55087	64627
1-4_GL0000992	120930	112470	114050	110180	120050	111510	119710	99744	124450	119000			Q8R146	139430	146800	139300	151450	131160	149250	139370	136070	129370	131700
1-4_GL0011369;5-6_GL0060701	457460	413900	481820	446220	458570	460660	486100	440660	462970	427360			Q8R1I1	118620	91352	93008	77477	127450	111500	147550	118700	126200	143380
14_GL0016880	747880	762980	730340	726940	757710	735710	693170	717330	752910	789970			Q8R1M8	3888300	3822500	3776300	3714000	3896600	3894700	3748600	3573400	3652200	3262600
1-4_GL0020599;MH-6-1_GL0022310;MC-6-4_GL0086245;Group2-7A_GL0060830	100070	94351	88691	98909	78484	96247	103350	83092	106110	110130			Q8R2P1	74755	103180	96994	104560	107290	107630	95232	92465	93078	77543
14_GL0022104;23_GL0018553	94400	110130	98458	97733	101500	108780	102260	107570	100040	115070			Q8R3G9	1816900	1821700	1712000	1757800	1958300	1805400	1877600	1997900	2013800	2190100
14_GL0024258	437500	541070	546530	505750	458550	440410	452500	476040	418750	384690			Q8R3I2	397970	428060	417970	391460	407250	401550	85913	412410	434760	471500
1-4_GL0026046	126190	125580	125110	126520	133530	155940	145770	132950	144750	161190			Q8R429;Q64518;O55143	29841	41793	32301	39040	46526	40804	35663	58244	48339	48576
14_GL0026545	48557	139150	45110	34082	29399	20264	23496	9219.1	44843	22072			Q8VC28	20525	24240	21933	18017	24162	25968	26932	22783	24504	18968
14_GL0028185	310140	302320	277760	324680	301500	323650	320000	307110	327900	361660			Q8VCI0	99488	94374	91651	105170	106680	103170	97179	108480	107080	106310
1-4_GL0031628	154310	180740	154950	181610	172590	181370	157690	152720	153720	152220			Q8VCK7	27690	18923	31783	30840	22129	25231	15053	14164	NA	NA
14_GL0031812	113540	113910	116280	132070	140470	124510	95303	99583	115230	130600			Q8VCN5	192750	184060	180010	185450	183270	205800	183910	201560	189870	232320
14_GL0032835	229130	203090	198880	274620	246040	220870	242230	232820	225490	310890			Q8VDD5;O08638;Q61879	268220	253640	232290	266550	246690	282130	255650	288040	263310	297980
14_GL0045078	16516	11295	17828	11265	13369	15392	16425	18024	12808	13297			Q8VDN2;Q6PIE5;Q9WV27	650120	661100	641120	654510	673440	689410	690590	676990	712860	717970
14_GL0045534	70630	52188	58224	61096	48506	31567	62349	47689	43666	25317			Q8VEK0	29126	12596	9964.6	6457	7671	NA	11127	6191.9	NA	34971
14_GL0046265	NA	50535	NA	NA	41320	352.53	32600	63524	NA	10261			Q8VEM8	436810	428110	406440	459930	462110	430170	420780	420980	406970	408240
14_GL0056356	112670	119030	103140	107110	99443	125370	126910	175220	103170	135640			Q8VEN2	104750	93239	93508	97678	79337	99163	91973	97458	108420	105970
1-4_GL0058523	79127	90942	69782	81427	78611	82795	69921	79404	70495	87010			Q8VHF2	1896100	2042500	1918400	2104000	1902100	1939600	1906100	1963100	1976800	1981900
1-4_GL0059879;S-Fe7_GL0070778	67976	79321	80683	78999	78076	79223	76258	82249	90515	88608			Q8VHV1	139250	168960	162090	189680	134260	150390	149500	169340	157320	161920
14_GL0060733;1-4_GL0028900;1-1_GL0003671;3-5_GL0061738;1-4_GL0024956;23_GL0149752;MC-0-1_GL0028363;S-Fe7_GL0191360;23_GL0105051;7-5_GL0055455;MC-6-4_GL0069182;5-6_GL0079744;8-6_GL0002466;6-3_GL0007035;16_GL0110771	592520	576820	568340	603250	468130	594550	627290	543130	614910	639570			Q91V76	229610	214710	240850	259330	247060	243870	239800	226650	237110	202070
14_GL0077266	51763	41834	45479	44650	49845	51306	47045	50860	63548	67580			Q91VA1	336440	309040	339000	352480	356900	343550	334380	347850	354700	310650
1-4_GL0080002	413690	385120	376870	401070	425950	428450	416320	463280	497700	488810			Q91VD9	16653	10092	13754	12797	13334	11207	8822.5	11708	7287.1	5540.8
14_GL0085272;MC-6-1_GL0029908;35_GL0149062;7_GL0102444;7-4_GL0131624;MH-6-3_GL0020275	192690	199430	197430	187900	194320	170730	188240	162270	218750	142080			Q91VR2	22409	11803	63308	35974	38478	NA	22733	32919	20204	43134
14_GL0090060;Group2-4A_GL0020961	20842	20239	11671	18537	21780	17330	20553	26514	29116	9971.4			Q91W90	42633	34529	54124	38873	37744	44086	59552	34070	37072	56935
14_GL0090199	474420	438530	520350	498790	466360	470730	468660	435460	457580	463930			Q91WD5	28322	25390	27923	32561	32407	38662	25608	33318	NA	20331
1-4_GL0093240	220050	236640	199690	258410	223130	231970	201930	190210	244630	251320			Q91WG0;Q6AW46	1129700	1120200	1105800	1108600	1124400	1125100	1110300	1104400	1071300	1056100
1-4_GL0094030	252840	297010	240210	166690	320740	285640	310150	496120	307590	218130			Q91WK5	NA	NA	NA	930.45	4783.9	2254.3	1906.5	43992	NA	NA
1-4_GL0094208	38142	33333	38119	41355	35850	39416	40357	43565	42112	48035			Q91WL0	107130	99547	82166	110480	90219	95962	95713	92833	88738	87390
1-4_GL0101572	68914	63679	72702	77648	65702	66324	68992	73361	89170	73274			Q91WP6;Q5I2A0	257830	202590	171650	277870	281700	299520	268410	221190	306240	264460
14_GL0104367	89238	90116	99998	79946	75474	111300	87536	89248	95547	113610			Q91WS0	70805	67586	66573	43429	69135	54544	13458	56771	51807	54500
14_GL0105035	30491	119480	103930	153030	70519	54435	64321	25702	94051	64197			Q91WU0	102320	46532	52767	70867	83085	98003	80037	78835	76094	75736
14_GL0106635	128320	124160	118990	127960	113160	127030	133580	115560	112490	115900			Q91WV7	502370	474580	491490	465540	477420	484830	471510	514000	509980	506420
14_GL0107848	145480	114130	110890	119720	97633	128720	130850	111540	126300	129440			Q91X17	148180	144040	122560	139220	150650	139610	113890	143410	110000	145920
14_GL0118271	206030	150020	151510	204550	196930	209360	185740	206410	197570	209130			Q91X79	4926100	4720800	4672500	4781500	4880400	4991400	4837000	4905400	4995700	5227000
14_GL0118341	211990	261930	222320	175630	253980	185390	197350	222820	235830	231840			Q91XA2	28330	9753.5	10203	17148	16688	3602.4	10337	23299	18580	11307
14_GL0128099;S-Fe5_GL0110042	161420	149060	153360	153090	154680	144440	171240	169270	168140	152390			Q91XA9	7832200	7624600	7732000	8075100	7681700	7926500	7618700	7299500	7628700	7771300
14_GL0134653	245120	200820	208620	206690	215000	241740	227160	235470	257080	270700			Q91Y97	27660	29498	28467	24118	26559	30811	43811	34430	42829	35089
14_GL0136631	22151	24312	22127	31031	23690	21911	24914	38952	39445	36475			Q91YQ5	56860	20091	38781	43503	20716	39853	41565	35136	33740	32230
14_GL0138138	27776	25812	27982	21307	19222	22663	20781	13191	26070	NA			Q91YT0	87975	88185	100940	97997	98777	92532	94062	93945	119700	101340
1-5_GL0023339;MH-0-3_GL0065403;1-2_GL0048644	110170	88758	96729	106520	100120	107120	90284	77437	122840	99335			Q91Z83;Q02566	341170	342470	350670	379250	375890	374360	356760	332850	343620	347280
1-5_GL0029067	161640	142640	141220	156190	135660	124210	129290	121170	123260	82160			Q91ZW3;Q6PGB8	414010	396590	407250	378520	373090	371440	340800	362120	317020	261810
1-5_GL0036722	44496	39632	37923	36264	44506	31968	39919	42201	38513	42502			Q921I1	479970	472850	486780	466670	471910	468460	460360	507980	486570	530730
1-5_GL0038598;2_GL0115137	51245	64095	45258	39098	42741	48787	48805	53025	72269	50869			Q924M7	11435	NA	11993	11250	NA	15144	18864	17381	17690	13042
1-5_GL0072941	342060	352500	322830	343260	332700	343820	320410	342230	331630	319730			Q93092	315.2	882.39	1829	2151.5	632.96	753.24	1272.1	1358.2	3260.3	2811.6
1-5_GL0075367	111140	95740	98723	105030	122860	123570	121590	127030	128360	145090			Q99J77	92169	76700	82576	80794	78761	86779	87501	84581	99842	89845
16_GL0001238	156870	35067	NA	26765	62997	NA	19285	NA	NA	74056			Q99JG3	243770	235880	209150	230940	235770	231090	223950	250910	227480	249090
16_GL0002435	32631	29346	28952	23691	32957	44287	22606	26916	30868	39713			Q99JW5	357510	348910	345010	328560	340840	332160	357710	366810	313350	337680
1-6_GL0004407	311470	285950	328400	369980	324160	330680	350770	346060	350060	300520			Q99JY0	52826	56486	60837	56068	55886	65018	51019	76687	53767	60073
1-6_GL0007650;S-Fe6_GL0073324;38_GL0136918;S-Fe20_GL0186196;MC-0-1_GL0030789	192440	154620	150000	209890	201600	194080	187960	202240	183310	207040			Q99JY9	174900	181510	52258	59267	100550	476770	144990	NA	NA	NA
16_GL0008788	52593	57708	33674	51474	48011	46805	52964	54594	47537	68851			Q99JZ0	47173	37814	29528	31528	46004	30455	57919	38178	51231	48610
16_GL0012697	71170	85091	88631	94083	88209	91148	101270	93374	87543	96126			Q99K30	43015	42647	64970	43436	41827	69887	114990	34660	62146	286990
1-6_GL0017811	186500	177160	175620	170730	182190	188590	182990	213570	203370	226030			Q99KB8	291730	304630	257830	239270	272450	280780	297570	287680	303060	313420
16_GL0018914	119720	146010	125840	126510	141450	108410	115020	137020	127510	107570			Q99KE1	26431	22118	22036	19279	14086	24599	15033	29631	19424	25709
1-6_GL0019151	358380	387210	382360	373870	372680	353500	315440	363520	313110	310800			Q99KF1	12842	12173	14123	13519	14390	13867	15723	NA	NA	13984
1-6_GL0034481	21961	12834	18276	18645	20249	22365	25966	18947	12710	17313			Q99KI0	287110	275060	292140	278980	274590	279060	268800	272160	301140	298820
1-6_GL0034482	3234.1	NA	46417	63296	NA	56088	34093	NA	66269	63330			Q99KK9;Q61035	93532	88308	89239	76766	106150	103340	83298	99166	105020	111370
1-6_GL0034486	164070	122620	128260	149590	199610	155660	118400	154040	147820	136720			Q99KP3	25436	4006.1	27962	28022	24096	24948	4908.7	27784	32846	22368
16_GL0036423	130430	116330	123160	122820	123870	128470	119970	128740	124660	120550			Q99KV1	10070	NA	NA	18653	NA	20986	6954.5	14474	9680.2	8796.9
1-6_GL0038420	36306	35217	32402	37159	30514	34827	25964	36033	39698	38812			Q99LC5	283370	217940	274700	291450	211220	230500	253870	214390	257300	226180
16_GL0053753	68318	44208	50031	46838	50543	57998	68963	38120	52477	63952			Q99LJ1	44178	49778	45881	58605	53706	51791	39757	48750	52101	53308
16_GL0055680	79594	73006	74118	88141	83229	90911	87410	93711	93395	95614			Q99MN9	17233	29242	27142	14198	34012	34682	23269	29772	31994	33349
1-6_GL0056681	793320	727270	725120	733650	743560	751740	753160	756730	818820	805010			Q99MZ6;P97479	113250	112500	112790	106020	104910	111900	97933	106620	118430	112630
1-6_GL0057821	35298	36796	34062	35953	33086	36256	35307	76672	46995	45650			Q99P86	354070	363400	374760	27608	193450	371640	403800	427910	416590	10132
1-6_GL0071686	51534	61469	54516	46332	66985	67203	58738	32045	56272	73563			Q99PD7	319520	333860	327170	348440	316660	294770	325490	295640	322990	342970
16_GL0074983	192730	166720	122580	109120	145700	147530	126270	139430	167770	173630			Q99PT1	630340	649650	655210	664480	652930	670220	584990	701150	653000	665450
16_GL0077348	19122	34081	21851	27296	31148	20073	12461	20399	31428	25507			Q9CPQ1	200930	195820	188730	161340	172020	188650	181820	186260	209800	208000
1-6_GL0079693	103540	97765	102560	93463	88363	109710	100880	117500	105120	125310			Q9CPQ8	236790	228700	327320	339490	250270	292750	236290	247120	175090	168100
16_GL0083579	821810	823150	775840	792560	781010	841090	844840	878260	880260	919740			Q9CPU0	79225	77013	80224	81765	87456	70698	83291	75873	94891	79910
16_GL0085211;S-Fe11_GL0089649	101790	91171	99015	86999	112870	107970	118370	92953	77516	114280			Q9CPU4	340080	292470	299670	242920	258770	290420	277260	368860	407440	351020
1-6_GL0086957	46177	38438	39642	43427	50062	55337	48120	42284	48051	56793			Q9CPY7	1358200	1344500	1333200	1373700	1356200	1393100	1345400	1404400	1362000	1467900
16_GL0092029	59106	59017	51353	61865	46792	63425	56950	57337	49574	67239			Q9CQ52	49600000	48834000	49364000	51317000	49554000	51263000	51762000	47921000	48949000	49787000
16_GL0093860	NA	548420	123850	464010	639790	794870	714680	726080	707340	910420			Q9CQ62	28511	46893	40874	30136	28721	56621	36392	49748	42964	59371
1-6_GL0094859	63796	59564	67792	45805	61375	68264	66813	67695	73040	63443			Q9CQA3	104420	106500	102000	101160	107540	101130	102520	108620	100920	98176
16_GL0101698	80949	69749	64124	62136	65606	76148	76850	72713	81717	87678			Q9CQC2	3974000	4151500	3948100	3953400	3631400	4091800	3622300	2933200	3923300	4373600
16_GL0104024	87840	83678	93625	98450	91801	99956	69420	101160	102360	92421			Q9CQQ7	134820	115850	145020	122420	119750	145150	123460	150330	119230	151040
16_GL0104380	119780	122600	96800	119610	116680	117270	117270	129590	125560	135490			Q9CQR2	12457	8931.9	10835	9690.4	NA	10107	10393	7635.8	9951.9	NA
1-6_GL0107645	21667	24570	32159	29608	25573	20853	21438	26422	22581	22205			Q9CQV3	102080	103330	84800	123480	86565	89059	96701	117910	74603	78751
16_GL0108906	31763	22980	28516	26433	25972	28165	27091	22304	26750	17392			Q9CQV8	21389	11865	16480	17819	18392	16846	24467	19047	22955	21527
16_GL0111863	129030	134430	123750	139630	126760	132370	143810	139250	138900	145780			Q9CQW5	25541	27443	27481	26129	26243	35594	27848	26517	33539	29130
17_GL0005632	215640	207060	229820	215350	208090	237490	218990	218200	210810	233450			Q9CQX2	19357	38379	24404	29325	19945	30561	26559	33511	26716	26763
17_GL0007853	178660	170560	143850	155830	107800	176000	151670	7142.7	111960	141220			Q9CQZ6	40027	45011	42991	42559	37701	47359	41795	39825	41237	44755
17_GL0012715	213620	148670	149060	146590	141020	225890	262050	400830	192850	490400			Q9CR02	318100	321780	296220	382430	386530	336110	401770	351180	343170	439990
17_GL0017174;17_GL0002929;20_GL0064585	64156	280850	NA	57048	55171	61821	225990	60758	NA	312110			Q9CR35	18261000	17576000	17777000	18309000	18276000	18336000	17824000	17050000	17768000	18125000
17_GL0017708;34_GL0016941	16072	NA	26714	NA	18522	13228	20249	NA	NA	NA			Q9CR57	4003.3	11825	NA	10601	14510	13738	17801	17246	17326	21459
17_GL0025669	55138	57280	52296	56968	54977	45025	49036	52200	49479	51001			Q9CR68	351480	362180	383730	411210	496290	406430	427420	411200	419040	469500
17_GL0031453;35_GL0119623	51044	55980	50443	50863	53153	50878	51136	59194	60233	87911			Q9CRY7	156410	164730	150080	165550	140360	153690	140560	140670	120180	104210
1-7_GL0032360	50159	57057	51290	52434	56804	61736	55522	51623	48787	52909			Q9CVB6	28816	26965	21005	26829	31060	30903	29846	25909	34769	25380
17_GL0034252	77824	62071	68882	61661	75842	68779	79454	86238	81653	89134			Q9CXF0	199280	136880	205870	219320	199130	187510	191910	172570	195360	80826
17_GL0038620	74717	83938	91759	96130	89889	78244	92508	71654	71923	74130			Q9CYA0	25351	20494	19769	31487	32608	19051	43029	33986	34953	38174
17_GL0041592	398000	408430	433910	409850	396270	432260	430860	388030	385020	408870			Q9CZ13	183540	166930	171490	180180	188750	162600	183730	167580	180020	198760
1-7_GL0042718	38400	32445	29887	32184	32347	37439	34960	36339	33294	38856			Q9CZM2	67266	75923	38416	68276	49567	67665	51701	86453	74394	91631
17_GL0044386;20_GL0082386;8-2_GL0127477	12197000	12729000	11803000	11930000	11938000	11969000	11779000	12131000	11539000	12312000			Q9CZS1	149560	120600	152680	145990	136870	151300	139670	133150	146220	108930
17_GL0044561;S-Fe7_GL0260487;S-Fe3_GL0018540;52_GL0098467;1-1_GL0023442;MH-6-3_GL0108133;41_GL0082993;S-Fe8_GL0209974;8-2_GL0008326	28200	30567	25935	31612	32897	31854	33166	31995	34345	31117			Q9CZU6	449590	434640	452590	407280	466690	434590	462300	510090	491230	528360
1-7_GL0050721;2-1_GL0035926;2-3_GL0035795;S-Fe12_GL0128799;G1-1A_GL0025113	1657900	1663500	1656900	1716900	1650800	1729200	1648700	1710200	1702200	1789400			Q9D051	NA	13619	15825	17657	8951.5	15505	19973	12532	12265	10196
17_GL0054728	43665	37697	38264	30897	39478	42667	25165	43838	39057	38046			Q9D0L8	1137900	1182600	1183800	1313400	1351300	1391600	1691100	1676200	1554900	1211000
17_GL0057695	166460	104700	118180	NA	64411	164540	108300	186180	NA	117560			Q9D0M3	69758	58512	54251	43040	70117	64279	65403	62988	90150	87344
17_GL0063191	112360	125140	125610	122780	120030	122780	106660	125000	107980	130390			Q9D0R4	422470	384350	391710	388880	390190	381790	353850	349890	341250	398000
1-7_GL0071625	101560	85876	96096	80597	95352	101150	93876	99692	98069	93612			Q9D154;Q8VHP7;Q5SV42	1355900	1327100	1392200	1406400	1386400	1376200	1361600	1308800	1263900	1256900
1-7_GL0075894;S-Fe7_GL0051574;MH-0-5_GL0121836;S-Fe1_GL0048528	112090	102700	105550	94555	109280	109600	99370	108620	103820	110320			Q9D1A2	338670	326110	324740	349440	330640	313530	337100	331100	302660	281100
17_GL0081252;2_GL0001740;Group2-6A_GL0037095;20_GL0005185;17_GL0139147;20_GL0129438;1A-dyr2-07_GL0001224;S-Fe3_GL0056909;Group2-3A_GL0030493	23103	38350	31715	14570	25335	30613	26346	24273	36950	24057			Q9D1D4	57828	50756	65150	76894	50607	64989	58811	48608	63688	58784
17_GL0082678;G1-7A_GL0075935;8_GL0085543;20_GL0085072;17_GL0109217	44281	41652	31852	42822	44750	43504	56009	47987	43612	43430			Q9D2G2	72002	87375	80637	78931	67257	80610	75692	53669	69587	49952
17_GL0083320;1-3_GL0064412	135040	147360	136250	138240	156550	135250	141240	136810	125170	102210			Q9D2U9;Q8CGP0;Q64524	70669	77564	73280	78929	82971	99894	84631	70923	173580	60609
17_GL0086790	99779	95424	111800	104240	110190	107370	99952	98905	105860	87048			Q9D2Z1	52522	59886	56039	59383	56826	58088	56448	57607	62178	55060
1-7_GL0088538	19849	18428	20332	23397	21845	18005	20438	17998	18855	13525			Q9D311;Q8VE49	135250	132900	133190	161910	154680	137820	140620	133380	145930	126140
17_GL0098350	346440	357840	360630	364960	347900	376810	279020	351910	313240	351490			Q9D3H2	1349400	1309600	1243400	1341200	1403200	1412100	1416400	1343100	1356800	1450000
17_GL0099111	181870	171120	163400	161830	175780	162850	172060	163930	171430	181340			Q9D687	108120	113810	110850	114800	114180	107640	108980	121810	120190	121710
17_GL0099112	46840	31017	54909	45281	41945	60969	44649	49292	60072	68762			Q9D6R2	75350	77098	67632	70660	79005	72774	75803	81206	77343	82640
17_GL0100210	13664	10525	13298	34063	10717	9419.3	7936.4	11069	33638	17542			Q9D733	4301500	4163200	3880500	3931500	3970100	4208100	4027400	4225000	4016100	4144400
17_GL0101695	56214	51219	49150	58653	70534	81242	79291	76157	76069	81305			Q9D799	92494	114020	118910	119240	116080	107830	131700	101230	95082	64438
17_GL0105836	619840	647280	616570	664720	636680	638380	645690	621450	647250	650630			Q9D7B6	0.95737	0.87855	0.98712	0.98806	1.013	1.0727	1.0077	1.0646	0.97233	1.0586
1-7_GL0113738	119540	152900	141070	144850	168080	120190	140290	155730	117440	147890			Q9D7L8	147750	127450	129910	136700	125410	130080	138930	127500	137370	128600
17_GL0115680	99798	103590	67571	106200	79689	79567	79879	65543	52755	35677			Q9D7P9	53384	51958	47623	54458	42466	57495	49687	51479	58029	62455
17_GL0116041	2086600	2363800	2309000	2075500	2030900	2279200	2133500	2609900	2203200	2612900			Q9D7Z6	2883000	2968700	2884400	2931500	2898800	3006800	2965900	3067800	3008900	3149200
17_GL0117386	420100	531690	813630	786840	506630	498960	529800	761570	491090	1058800			Q9D816	512900	505470	498260	509430	475580	510670	499940	508420	521900	489520
1-7_GL0120419;1-3_GL0017870	292380	289320	276270	297280	321010	316510	321350	283330	299570	300330			Q9D819	9235.4	NA	2745.9	9025.7	7268.9	5209.4	6036	8697.6	8284.8	6668.1
1-7_GL0120747	439970	431830	505830	482440	416410	432220	464360	365750	374930	325320			Q9D855	103610	114650	108170	97493	104590	105070	102260	116110	116450	115580
17_GL0125692	79849	70524	91033	79500	67160	85974	88528	82345	89642	66884			Q9D8E6	21949	17034	19735	14321	23123	23390	21807	34612	42897	47406
1-7_GL0127377	273030	235620	223380	258250	232710	268090	248430	249720	267330	297670			Q9D8G5	55035	46997	125630	NA	93894	76254	90048	NA	61462	NA
17_GL0127899	39911	36114	39198	48052	40240	41528	35536	40861	48818	39858			Q9D8N0	90461	118580	94066	115180	120060	115110	95430	105720	104710	113440
1-7_GL0129603	133800	135080	141380	152610	146590	151740	155110	150790	137620	157770			Q9D952	4541800	5584800	4455600	4569300	4778300	4609900	4453900	2796100	4496100	4553700
17_GL0132051;20_GL0145886;17_GL0088819;G1-7A_GL0018427;20_GL0085515;17_GL0160254	47163	44208	54047	49966	52944	51906	58901	50636	47653	58078			Q9DA19	1679200	1667800	1700800	1753000	1703600	1705300	1736400	1392400	1422900	1675000
17_GL0135287;29_GL0049199;2-4_GL0006265;2-2_GL0129598;S-Fe12_GL0050488;1-1_GL0029137;MC-6-2_GL0110651;MC-6-2_GL0140356	178900	152680	120810	156900	164180	151960	179270	206330	206960	200900			Q9DAX9	47585	170330	157130	185290	21318	157960	176430	189610	123760	147390
17_GL0138871	5543.3	1262.6	12276	3664.4	5805.6	3532.8	8029.6	1412.6	4552.3	5764.4			Q9DB20	156600	149700	146240	151540	153600	145620	164740	151100	163680	171050
17_GL0140266	409460	334250	329790	383670	140240	346240	338430	314330	338020	301820			Q9DB77	283920	295880	302900	283080	282160	299280	285690	290050	312940	302030
17_GL0140636;14_GL0001317	39446	NA	291350	36961	33632	30950	NA	37121	NA	262200			Q9DBG6	22194	34420	31093	10368	12738	29333	18880	28249	86364	38116
1-7_GL0142767;40_GL0071771;1-1_GL0070442	80549	58934	59798	60485	107080	57962	59157	106410	102460	81703			Q9DBJ1	64604	70911	65343	32991	60442	59447	72658	53373	43695	28330
1-7_GL0146731	377640	389050	427850	431700	390520	372240	399840	421540	390670	333660			Q9DBP5	72550	74184	75592	112850	78120	48779	64725	80082	69845	79024
17_GL0151479	85576	86895	83945	82746	92998	88888	89166	104460	99538	104050			Q9DBX3	222080	186980	185530	186490	214090	204650	210560	204480	208700	228150
17_GL0153311;2-1_GL0018300;Group2-7A_GL0070020	606900	596560	612920	639880	550540	613460	581440	599070	584170	586680			Q9DC50	20561	22643	19168	30060	6503.9	19716	21271	17578	19720	19198
17_GL0153450	121470	114270	109170	113320	121900	122320	118090	131170	137120	148200			Q9DC69	5821.8	3793.4	3542.9	3532.9	NA	3527.8	4228.8	2706.9	3926.3	1949.3
17_GL0156126	59679	54799	51420	55013	57314	47380	50786	82709	57873	57827			Q9DCD0	41206	25241	18357	24006	27966	34254	29009	54417	34939	47207
17_GL0156635	487920	459620	448000	462540	461770	487870	473620	480570	484000	532930			Q9DCJ5	26866	26736	NA	29431	30836	23344	NA	24178	NA	NA
17_GL0160550	86039	293640	264600	276140	252710	296350	350020	231190	347480	346950			Q9DCM0	175220	143220	188870	191520	165610	194920	180620	160600	176780	194240
1-8_GL0002819	490820	507340	532930	552420	467390	472910	502440	456600	456500	443980			Q9DCT2	31010	47156	50384	34315	55976	51332	39394	NA	47877	43126
1-8_GL0016906	27159	24472	16701	25652	22636	26735	25703	24649	27854	681910			Q9DCW4	39413	31334	38413	41778	23859	20019	34720	38090	21488	16764
1-8_GL0040021	93830	84951	81762	86505	105350	98508	85196	94747	101550	109920			Q9DCX2	114610	65905	133360	94050	97743	118260	112980	87534	85003	56034
1-8_GL0064640;28_GL0027363;MC-0-1_GL0036391;10_GL0027835;G1-1A_GL0032124;1A-dyr2-07_GL0057578	124220	104210	101310	124990	120250	98926	108890	127000	94811	63215			Q9DD20	19328	18228	20016	19853	18972	24330	23921	23064	24452	24774
1-8_GL0071629;1-7_GL0015164;8_GL0016986;MH-6-4_GL0119103	45772	13447	1511.4	12485	15414	NA	6463.1	12705	30677	4155.2			Q9EQ06	23543	26865	25852	25386	28223	33527	30619	37775	33674	36556
1-8_GL0078987	425190	475820	472700	466730	449840	488570	452040	415650	443580	438310			Q9EQK5	99180	122090	106190	94672	95033	105770	91565	78787	83463	60265
1-8_GL0083404;G1-1A_GL0107449	669850	499770	512470	553690	710290	986610	991050	941020	830810	769960			Q9EQU5	54151	57387	55319	56020	62163	55963	44622	54370	59243	50910
1-8_GL0091748	97536	84271	89897	109040	81524	97538	90311	87366	94932	95412			Q9ES64	23488	26880	17104	21568	24806	36503	13968	11235	6218.7	17707
1-8_GL0096783;8-1_GL0122418;7-4_GL0016879	192860	184640	190170	209630	219220	214320	211230	209040	215620	213840			Q9ES88	3119	12113	10315	2612.8	1789.4	233.19	18345	3346.5	8031	3183.1
19_GL0012001;1-8_GL0081270;MC-6-1_GL0038567;38_GL0098251	38721	40324	NA	71192	53818	68212	59957	59655	66250	79169			Q9ET22	360.87	61374	1469.1	1057	NA	NA	2440.7	1144.7	1433.4	1644.3
19_GL0026803;25_GL0027332	249900	228250	229570	207160	261960	263490	246600	232710	258380	307640			Q9JHE3	1882900	1743700	1765700	1799600	1803700	2042100	1797600	1905500	1925700	2019900
19_GL0028928;1-1_GL0071681	33102	28814	30804	34603	31777	32230	29877	27171	35405	36767			Q9JI48	5309900	5163400	4891700	5314400	5545800	5917200	6299400	6135300	6104400	6207700
19_GL0043319	158470	178760	132610	147790	187650	154190	172590	134190	210470	232430			Q9JI67	7440.6	NA	12763	10691	45329	NA	14925	NA	14244	NA
19_GL0049070	108710	91670	108590	106080	106850	106630	120770	113420	121610	113340			Q9JII6	28205	20373	24796	26405	21509	25389	24121	28054	26700	24904
19_GL0062420	112290	107890	105120	99622	85343	86424	80830	112950	100910	112810			Q9JIP7	265700	285840	280950	299150	299120	304530	269830	281180	282140	274560
19_GL0080876	97336	75538	94158	111920	85209	85377	90029	72371	83211	56214			Q9JIQ8	16001	15226	15938	22555	17536	15807	18360	16068	18999	12565
19_GL0086251	62452	54810	48368	56747	56032	54522	55052	74037	77294	74119			Q9JJ00	306830	326960	337300	364790	359050	360240	332540	368150	348740	384010
1A-dyr1-07_GL0006858	35645	43095	39421	38107	37751	47238	39525	43565	38965	38931			Q9JJI8	7449.5	44981	3274.7	42566	3165.6	1252.8	44112	60316	7811.6	37376
1A-dyr1-07_GL0022001;6-6_GL0094383;11_GL0136326;1-2_GL0082674	502140	529220	522750	549920	483890	521820	503250	538920	489460	548340			Q9JK88	364140	361030	349610	367460	401370	331920	375440	368710	367530	388180
1A-dyr1-07_GL0022012;1-1_GL0008776	303560	229200	307510	326230	287810	253710	78855	284260	283400	260470			Q9JKA5	629070	628780	601390	631450	629460	637370	619370	700690	680530	652130
1A-dyr1-07_GL0027622;5-8_GL0155540	605350	733000	721970	666580	637000	745640	785810	820780	783120	820530			Q9JKF1	9734.3	6947.2	7996.4	10275	9528.3	9150.1	14224	10371	7466.3	5630.2
1A-dyr1-07_GL0028607	517160	489500	489350	507080	491350	518410	519760	524580	529740	503540			Q9JLB4	565990	554430	549810	566210	559670	587970	563360	572090	608440	634560
1A-dyr1-07_GL0041020	8489.2	38907	NA	18900	23734	23625	21670	26383	15732	24952			Q9JLC4	331530	357620	348960	394110	411250	368120	385310	367830	363540	429280
1A-dyr2-07_GL0001117	63915	61955	68366	56583	65155	99095	66721	64037	69478	86799			Q9JLR9	7030.7	10697	8719.9	7085.3	8261.2	NA	43757	13207	43143	8158.1
1A-dyr2-07_GL0002158	11229	33784	34430	27330	40426	24835	33720	39645	44494	32414			Q9JLT2	725420	722460	712410	699650	690130	722660	679540	696440	677550	732030
1A-dyr2-07_GL0005927	59591	53929	51671	58251	61694	59346	58358	54912	60570	53831			Q9JM84	26681	27017	25777	20006	18103	27988	25766	28084	27147	28585
1A-dyr2-07_GL0007771	88935	109800	88557	67319	80352	107900	80213	65731	90833	72819			Q9JMA9	65387	73858	56515	72064	69545	66303	69112	68410	69616	66446
1A-dyr2-07_GL0012775	150120	146820	131250	134350	157830	130280	134740	125750	153720	161490			Q9JMH6	125420	148260	158970	140410	156370	145890	154140	166180	147410	183830
1A-dyr2-07_GL0013677	384330	367040	362610	386890	368390	418080	367040	393010	368730	378910			Q9NYQ2	73765	71168	70560	77984	84877	68805	73230	72654	69003	74143
1A-dyr2-07_GL0013684	61791	47195	62783	74465	36005	54600	63430	NA	76647	56640			Q9QUI0	45497	40714	34627	31084	42019	27396	36241	47543	43481	37690
1A-dyr2-07_GL0015347	84214	74129	76766	72572	72615	64046	82449	74431	82089	68192			Q9QUM9	177240	187920	188080	156480	153190	191050	148690	189700	166880	183500
1A-dyr2-07_GL0017940	879040	814930	1036000	1031500	941600	941570	993340	907300	838030	925040			Q9QUR6	106560	130760	161110	110070	123150	156240	110760	112950	112580	123620
1A-dyr2-07_GL0018394	NA	18696	65597	21232	39485	43226	51372	NA	40843	42272			Q9QWG7	79510	64508	83959	65612	64790	102810	72878	79781	68797	72826
1A-dyr2-07_GL0022384	48990	51434	72142	47712	40430	51503	49453	45460	65231	59473			Q9QWR8	70781	53181	57658	56407	61749	62473	58310	53558	54536	44400
1A-dyr2-07_GL0024075	7873.4	3757.2	47948	20140	19230	44086	3795.6	8961.7	9282.4	5388.5			Q9QX15	83619	80120	70447	74043	92585	74546	95589	107630	89353	109910
1A-dyr2-07_GL0025235	18991	16104	17839	13857	20099	16274	16130	14843	16453	5341.9			Q9QXS1	7716100	131210	8262000	6543000	198340	10870000	7551400	10513000	409780	8061100
1A-dyr2-07_GL0025321	38373	45520	58615	30191	32285	41300	34743	40601	42469	46487			Q9QYB5	64691	45384	6564.5	41602	43535	41901	46695	41693	NA	5616.3
1A-dyr2-07_GL0026662;G1-1A_GL0026386	492900	493870	487520	475540	487880	506530	497650	484060	524690	510330			Q9QYI7	1523400	1647300	1597200	1747900	1723700	1406300	1399100	1545200	1491800	1934800
1A-dyr2-07_GL0027476;17_GL0041626;26_GL0078522	413820	415300	371470	413270	437250	460390	454830	450080	451530	471850			Q9QYZ9	126120	137670	126260	151260	144520	151160	161610	144500	143060	182320
1A-dyr2-07_GL0027893	60907	40714	45301	65365	96416	49578	69566	62208	57956	31751			Q9QZN4	88700	76118	70486	77577	67901	84420	77472	79864	79572	95425
1A-dyr2-07_GL0028334;4-1_GL0065985;1-8_GL0053882;G1-1A_GL0070527;13_GL0085660;MC-0-1_GL0060605;MC-6-3_GL0028775;G1-1A_GL0096655;1A-dyr2-07_GL0065865;7-1_GL0076793;20_GL0014287;S-Fe10_GL0073477;MC-6-4_GL0006970;Group2-8A_GL0096241	273970	292750	245060	271510	268910	307950	263930	264790	286860	303250			Q9QZQ0	245910	237750	236280	256710	230380	253890	282170	172350	191520	199880
1A-dyr2-07_GL0032467	504930	546070	577430	581470	579590	486140	603230	593320	560050	350670			Q9R098	2167.3	4470.6	13478	230.02	213.33	696.23	3552.6	443.39	7273.2	514.99
1A-dyr2-07_GL0033201	290440	289310	294250	301880	304620	277890	263340	280950	278590	276860			Q9R0H0	34454	24394	29431	31059	31577	24203	23508	17531	21848	13632
1A-dyr2-07_GL0033906	53933	46927	52685	52230	56210	50185	60304	56242	62340	62772			Q9R0P5	146300	151990	152860	146440	151720	151790	136090	156860	154860	161820
1A-dyr2-07_GL0037152	43302	47183	54503	58764	50411	47247	35115	38536	38519	34629			Q9R100	3618300	3625100	3691300	3690200	3608900	3616600	3719200	3566000	3448200	3573100
1A-dyr2-07_GL0038040	134170	115010	50552	136730	27809	150540	190790	202800	242500	102280			Q9R112	216430	215360	216340	216350	219570	233620	222980	223840	231350	231270
1A-dyr2-07_GL0041271	22672	20907	26882	25640	26001	38145	36203	41337	11048	38052			Q9R1P0	377910	363850	388080	343180	297960	385230	384290	397470	369180	385530
1A-dyr2-07_GL0041521	NA	1076	7129.8	2655.2	NA	444.33	820.17	781.99	577.27	NA			Q9R1P1	106330	149060	168050	208940	151870	148180	164940	145800	160110	140940
1A-dyr2-07_GL0044881	35838	22738	24422	26796	28289	27143	31007	28849	16166	12691			Q9R1P4	76021	69472	69296	53298	62758	53713	60018	59745	61791	53724
1A-dyr2-07_GL0046703	170760	174020	165080	164320	173200	175580	171120	181210	169840	181780			Q9R1Q7	41.613	NA	71.005	NA	1242.7	NA	135.11	NA	100.67	NA
1A-dyr2-07_GL0047813	16020	13414	15739	17301	11267	18663	12996	13417	12487	15589			Q9R1Z7	7508.5	23798	8742.8	10226	19222	12019	25528	8977.3	10323	26863
1A-dyr2-07_GL0049124	41463	122600	112750	99233	127100	128370	111620	138070	115280	124600			Q9WTM3	8731	6253.2	8661.8	425.5	9017.1	8480.6	17836	5612.6	29944	8647.7
1A-dyr2-07_GL0049252	21262	11383	NA	20398	33544	23463	NA	19671	40900	37864			Q9WU78	33670	31903	18326	16436	47112	65755	22926	9807.1	18646	56021
1A-dyr2-07_GL0049302	26821	42437	50616	35495	40594	44303	42404	45950	27056	38373			Q9WUM5	9215.8	10094	11180	9566.1	6851.5	7920.8	8189.6	9586.4	10087	9169
1A-dyr2-07_GL0049869	58387	52062	53968	56023	61387	55435	58256	55701	54095	44741			Q9WV32	24034	22252	33265	15549	16547	5340.8	28510	25645	15722	33435
1A-dyr2-07_GL0051691	100620	86281	89452	88216	94418	92329	100000	115260	100270	116890			Q9WVA4	8368.3	11792	11303	8405.1	15513	7638.3	18277	6588	30693	4918.2
1A-dyr2-07_GL0054586	55387	55744	62828	46819	44189	52647	55898	73101	45491	73888			Q9WVC8	91091	84441	90189	105200	100700	88160	100960	107690	104250	95087
1A-dyr2-07_GL0057236;Group2-5A_GL0014900;S-Fe2_GL0214744	218180	183940	182860	207340	188720	218860	233870	215310	231150	215800			Q9WVJ3	77991	88743	85039	70510	88195	85429	81064	86347	82401	94220
1A-dyr2-07_GL0057868	31214	27465	27481	28750	24657	29453	25959	32773	34158	34369			Q9Z0F4	25663	19404	19758	19014	15353	14398	18984	21217	12790	11667
1A-dyr2-07_GL0058687;S-Fe10_GL0010502;1A-dyr3-06_GL0029045	215930	172600	210920	237130	217260	166060	166320	128610	86203	75238			Q9Z0G9	58605	64423	59670	53955	65765	49396	61745	66818	51352	40946
1A-dyr2-07_GL0064195;Group2-8A_GL0004158;1-8_GL0009479	157430	177930	160730	160340	172160	164600	171920	161410	167400	161760			Q9Z0J0	479780	486360	468880	529130	535540	495950	524090	498360	521740	533770
1A-dyr2-07_GL0064584	101700	117330	84760	104410	94373	91545	77331	57239	53330	38919			Q9Z0K8	494950	493370	491550	504700	493750	500850	469700	522650	521760	546270
1A-dyr2-07_GL0066529	123200	127900	150170	170670	126970	151170	143640	118730	138370	122280			Q9Z0L8	1423800	1329600	1481000	1271900	1356000	1361700	1379000	1500400	1423200	1464600
1A-dyr2-07_GL0068012	26830	18304	24121	18464	20206	33900	36450	18911	18963	31818			Q9Z0M1	205140	174470	194640	208010	283460	197850	210170	211510	229230	287750
1A-dyr2-07_GL0068242	42124	98882	132550	66668	164070	74881	145720	35976	41994	50423			Q9Z0Y2	1799000	1800800	1877500	1758300	1771100	1732600	1761600	1785200	1764400	1865500
1A-dyr2-07_GL0073121;2B-dyr24-06_GL0041129	31652	27855	31072	30859	35551	9060.3	38413	27588	26272	25463			Q9Z1P5	409510	347380	398350	416680	379080	60079	366670	47407	360100	406610
1A-dyr2-07_GL0073393	92966	90202	102760	104090	111480	108150	106070	100530	114180	106370			Q9Z1Q5	117760	120900	115620	104340	118390	108360	116650	107580	109930	125730
1A-dyr2-07_GL0073957	111440	137730	125680	180190	92894	NA	216640	170580	167640	133490			Q9Z1W8	361380	265970	281280	315960	335400	281960	309850	304830	350170	312820
1A-dyr2-07_GL0074297	179060	168980	146270	146900	152110	166570	133170	149200	171580	174490			Q9Z1Z2	76119	48370	56535	47576	33510	70898	65083	87198	72472	70765
1A-dyr2-07_GL0076977	33514	41215	36098	85616	NA	155150	62250	NA	NA	99036			Q9Z261	377800	390850	415760	434700	406620	433660	406990	379250	405500	358730
1A-dyr2-07_GL0079837	46243	38223	33287	31569	38611	36745	36966	39084	39713	35302			Q9Z2H7	168520	181620	120220	129440	123350	196640	176480	92500	157870	159910
1A-dyr2-07_GL0080061	156350	173120	156860	139930	159860	135840	130380	170130	175450	129630			Q9Z2I8	53248	51453	52674	50333	48250	46149	50234	47186	46607	49951
1A-dyr2-07_GL0080700;4-5_GL0094535;G1-5A_GL0113281	201090	55253	207420	63004	229970	207510	68360	207880	225750	222070			Q9Z2U0;Q9CWH6	169150	142940	163920	163490	159640	161260	148980	171660	156880	168080
1A-dyr2-07_GL0081225	239510	228880	210990	212850	238680	262470	224250	218210	246990	238360			Q9Z2U1	80008	68436	95481	85059	76693	45370	64940	68959	65802	97589
1A-dyr2-07_GL0081226;6-4_GL0032353	323780	330160	338070	338570	325240	352560	302070	332150	332270	323070			Q9Z2W0	789350	780900	762760	775040	739510	764880	722300	786180	777870	780380
1A-dyr3-06_GL0023343;S-Fe5_GL0087131;1A-dyr3-07_GL0042950	601490	577860	516890	565380	605820	611880	580120	568680	617960	612730			A2AEP0	1523700	1232300	1327500	1387500	1528000	1506400	1534300	1316500	1427900	1636300
1A-dyr3-07_GL0026644	955470	842440	789160	851370	829400	897210	1519400	989440	933110	930870			A2AJX4	158950	136480	147850	137720	158610	161710	133470	190000	149310	178680
1A-dyr4-07_GL0000364	308290	353060	326600	305370	268950	305370	235330	316670	283600	311180			A2ARP9	2003100	1867500	2860200	1940900	2510000	2376200	2182900	3261200	2488200	3289500
1A-dyr4-07_GL0002546	416640	404270	405860	410830	397740	409540	422220	419910	422640	498520			A2ASS6	1724000	1747500	1713100	1771300	1688400	1799700	1800900	1725900	1691500	1772000
1A-dyr4-07_GL0003295;8-1_GL0120912;Group2-3A_GL0034976;Group2-3A_GL0043324;G1-5A_GL0103962;G1-6A_GL0032118;5-8_GL0037685	144180	130180	143640	145070	135560	116770	141660	137230	124270	123060			A2BIM8;P02762;P04938;P11588	2054200	1956700	1942900	1353300	1370100	1687100	1277400	1383700	1572700	1401300
1A-dyr4-07_GL0005233;MH-6-1_GL0089961	42059	37765	43109	53829	48936	49404	50131	45691	53519	39279			B1AVD1	1737000	1687100	1736100	1779400	1834700	1778800	1766900	1774500	1745500	1878000
1A-dyr4-07_GL0006102	147710	147040	154300	161810	148810	158260	156510	158470	161380	137930			B2RXS4	41654	39509	27525	35113	33975	37258	29638	18164	33066	36258
1A-dyr4-07_GL0007893	129960	116370	113740	125930	126450	117160	123480	120280	132960	111310			B2RY04	1997800	2215400	2208000	2024500	2048000	2141600	2235900	1983700	1888800	2129300
1A-dyr4-07_GL0009722	3860400	3950400	3978800	3903600	4010300	4139600	3800800	3710100	3652600	3946300			B5X0G2;P11591	12709	7021.8	9655.8	17722	4466	12066	12585	7430.7	8078.4	10420
1A-dyr4-07_GL0011510	91250	107000	120020	101680	92191	83933	90163	93456	191990	95112			C0HKE5;C0HKE8;C0HKE1;C0HKE7;C0HKE2;C0HKE3;C0HKE4;C0HKE6;C0HKE9;Q8CGP7;Q8CGP5;Q8BFU2;Q8CGP6;Q8R1M2;P0C0S6;Q3THW5;P27661;Q64522	1142200	1105200	1082100	1126900	1095600	1128500	1130500	1157800	1197300	1145000
1A-dyr4-07_GL0011766	92478	114450	105120	104840	111040	103370	81194	100570	100660	115380			E9Q3E1;J3QMK6;Q80VQ0	62608	48649	63740	60968	69100	77656	84485	64443	72320	105620
1A-dyr4-07_GL0016031	90874	85111	86474	97606	74398	85756	92195	104470	88898	93532			E9Q7P9	2256700	2175700	2196700	2252600	2264000	2217400	2188900	2292300	2157900	2471100
1A-dyr4-07_GL0017631	47150	41278	43703	38184	34679	42390	28649	40189	42651	44914
1A-dyr4-07_GL0018595	348170	174420	741350	367290	285290	352690	197660	381500	313870	402970
1A-dyr4-07_GL0019666	444840	361010	412150	331360	412860	420550	466170	511820	551160	601040
1A-dyr4-07_GL0021362;Group2-5A_GL0149413;Group2-2A_GL0025382;8-1_GL0094982;8_GL0153459;6-4_GL0019431;6-3_GL0027473;3B-dyr36-06_GL0038076;1A-dyr2-07_GL0006914;1A-dyr1-07_GL0047212;G1-7A_GL0066840;Group2-3A_GL0110759;S-Fe2_GL0005285;6-1_GL0074696	30091	18775	21091	14487	9308.2	19318	16813	11748	17876	21134
1A-dyr4-07_GL0022802	939360	929730	951350	931880	965180	941370	946680	899890	868720	873940
1A-dyr4-07_GL0023556	85307	91932	103540	104640	80999	94877	86020	75122	79950	82264
1A-dyr4-07_GL0028776	278150	284150	306230	292670	291620	280440	280790	240620	282210	174990
1A-dyr4-07_GL0029594;5_GL0087218	NA	66221	67053	NA	NA	NA	49006	NA	NA	84800
1A-dyr4-07_GL0030450	237560	233950	231820	271680	255230	241870	233920	251920	238410	270410
1A-dyr4-07_GL0031946	643230	609190	594270	631580	608840	594050	597740	596870	567510	555520
1A-dyr4-07_GL0032842;11_GL0021639	33497	33687	39585	21055	37550	46364	8780.4	50414	54966	60964
1A-dyr4-07_GL0032843;5-7_GL0069852	24808	28247	19495	20709	27485	15590	17629	33625	18829	26370
1A-dyr4-07_GL0036868	42396	44616	39657	39136	30513	33319	43195	47443	48830	39451
1A-dyr4-07_GL0038717	72708	52987	31458	173750	52793	37835	51189	48791	74014	56149
1A-dyr4-07_GL0042683	385190	362410	414540	377150	364420	405170	346780	424670	390910	436500
1A-dyr4-07_GL0044722	1045600	1110700	1097800	1112000	1015200	989540	1079300	914890	881370	742260
1A-dyr4-07_GL0045601	37286	41729	43769	46663	37422	27680	37992	39708	33223	26112
1A-dyr4-07_GL0047715	263830	252660	265230	253740	241320	266420	261070	255600	274640	277930
1A-dyr4-07_GL0048238	43750	42217	27977	38815	35347	45166	46806	40650	31980	42081
1A-dyr4-07_GL0048670	517230	523720	524200	519790	526650	516150	505840	509090	510380	537070
1A-dyr4-07_GL0048671	34492	29484	26827	33355	31798	31927	34771	34957	32132	36614
1A-dyr4-07_GL0048823	64998	73692	63992	75203	43990	72049	66033	56160	75584	82946
1A-dyr4-07_GL0054230	50028	35927	42450	44608	41813	65006	39617	59484	43563	68234
1A-dyr4-07_GL0054244	493350	537600	550880	499240	461390	509160	534970	459280	470010	510100
1A-dyr4-07_GL0054247;11_GL0126032	72837	75997	79222	74568	79016	75146	73597	73905	66410	49176
1A-dyr4-07_GL0054950	178270	196760	182250	197400	186490	193580	170830	184730	191310	195960
1A-dyr4-07_GL0055880	56987	52808	39761	52219	58644	58788	59047	55075	50976	61319
1A-dyr4-07_GL0055881	140190	129240	131750	119450	143380	122260	115730	139980	130100	112230
1A-dyr4-07_GL0057270	NA	13806	16942	15562	16201	10514	13099	11413	31769	NA
1A-dyr4-07_GL0061974	66270	74552	79116	74992	68081	77145	74171	77694	82648	87249
1A-dyr4-07_GL0064894;Group2-3A_GL0002282;G1-5A_GL0213408;6-7_GL0116078;S-Fe12_GL0103183	117420	85897	103940	95502	90303	93625	87523	57086	78421	46900
1A-dyr4-07_GL0068118	85239	92200	92564	82146	93021	91615	98597	88464	97930	94813
1A-dyr4-07_GL0069799	NA	20799	NA	19273	NA	NA	NA	NA	5525.6	NA
1A-dyr4-07_GL0071878;S-Fe9_GL0044734	145010	86833	85771	140610	141600	155770	157080	165990	191330	175830
1A-dyr4-07_GL0074774	846580	849140	868270	889850	903370	847630	872880	835460	903920	942890
1A-dyr4-07_GL0078029	62648	72504	68120	63380	52301	56968	60702	53078	76555	70121
1A-dyr4-07_GL0078414	13834	6652.5	16897	17142	18875	17402	18115	16190	23102	17790
1A-dyr4-07_GL0079687	80413	120910	125070	116370	81152	106350	88550	132100	133840	113620
1A-dyr4-07_GL0080154	161580	182660	163780	166450	177710	188010	158520	178080	156840	187140
1A-dyr4-07_GL0081851	9114.1	297830	28191	37650	33991	386190	8650.4	43113	18672	43288
1A-dyr4-07_GL0083332	288960	322870	302490	340040	315430	311550	294480	305660	308180	275640
1A-dyr4-07_GL0084261	570070	613610	627850	575510	589580	580340	627040	593340	586910	621190
1A-dyr4-07_GL0084324	1123400	1082700	1071400	1121400	1157000	1178300	1167200	1177800	1194600	1226600
1A-dyr4-07_GL0086302	144330	127020	144140	130340	148220	140070	152270	130070	159970	188600
1A-dyr4-07_GL0086410	241550	241990	253060	262830	266620	285880	263520	262720	244870	269090
1A-dyr4-07_GL0089321	22553	21435	20573	14891	22295	21547	25053	27759	27092	27114
1A-dyr4-07_GL0089340	290780	288800	273000	298340	301480	295480	306480	286230	275250	260070
1A-dyr4-07_GL0090449	19404	119940	17739	127050	17118	19926	116850	15493	14097	93253
1A-dyr4-07_GL0092337	297320	306260	327140	328030	308420	256820	3205900	254180	262510	212120
1A-dyr4-07_GL0093212	157510	116590	134800	151400	126960	165280	110520	140410	162250	120630
1A-dyr4-07_GL0093575	49430	42887	42081	48798	51748	51662	53113	50522	58183	51825
1A-dyr4-07_GL0095483	453370	492570	513600	491070	433400	451780	457600	448610	456020	543100
1A-dyr4-07_GL0097123	NA	NA	NA	NA	10592	NA	NA	NA	16345	NA
1A-dyr4-07_GL0098195;S-Fe7_GL0065669	420240	503570	478500	190900	394410	333290	404210	492610	496850	362930
1A-dyr4-07_GL0098906	70668	67224	70471	63070	73019	67604	73497	76370	73773	79727
1A-dyr4-07_GL0102273	4634.8	4800.3	3669.8	4294.4	4196.9	4425.1	3542	3716.4	3691.7	2907
1A-dyr4-07_GL0103639	64365	43691	56373	54094	52598	65677	54063	68309	70836	69792
1A-dyr4-07_GL0104106	160290	158230	168820	171940	157730	170060	152820	133410	144770	136400
1A-dyr4-07_GL0104552	1552500	1515300	1574400	1640000	1598700	1738400	1615200	1657800	1556900	1737900
1A-dyr4-07_GL0106169	118560	116000	113100	123440	110190	111350	115330	118680	111720	92626
1A-dyr4-07_GL0106171	1151400	1279200	1258300	1411100	1335200	1271200	1280000	1317600	1230200	1350700
1A-dyr4-07_GL0106172	1299300	1349200	1337100	1322800	1394200	1249400	1354600	1212200	1342200	1349300
1A-dyr4-07_GL0106526	372020	389950	368470	400750	372430	368210	370960	373930	353950	348810
1A-dyr4-07_GL0106531	439980	427180	431060	404880	402940	430560	446700	432170	431700	410110
1A-dyr4-07_GL0109263	96760	97386	94919	99438	95847	105210	98772	116070	106460	108520
1A-dyr4-07_GL0109899	200030	164860	188140	189650	168880	175530	171930	175650	169580	229990
1A-dyr4-07_GL0110966	121460	146180	134610	133550	136580	145540	124420	132220	140100	174750
1A-dyr4-07_GL0110967	41831	60783	47378	51635	57842	62790	50334	65158	63680	53623
1A-dyr5-06_GL0003051	123320	102370	122400	105170	109070	123700	102910	116570	155570	136670
1A-dyr5-06_GL0004232	243590	236560	225400	146300	251780	266070	256890	223110	209680	259360
1A-dyr5-06_GL0012902	23616	22709	18903	27133	24370	14111	22002	33426	22595	43081
1A-dyr5-06_GL0015330	118060	99133	111640	102650	96646	126350	93703	135940	92882	132880
1A-dyr5-06_GL0021819	91801	395080	503290	77425	233210	90261	156940	193930	341580	410270
1A-dyr5-06_GL0059240;2B-dyr24-07_GL0039540;3-1_GL0089305;11_GL0017325	183790	188810	198610	215390	213730	216160	207770	226350	253650	272460
2_GL0008154;4-8_GL0022065;8-8_GL0063046	30548	22677	31128	35014	29863	28275	30266	39079	36207	25207
2_GL0032312;7-2_GL0002651;S-Fe6_GL0141242;8-1_GL0123359;S-Fe9_GL0231394;S-Fe20_GL0042327;7-8_GL0090586;MH-0-5_GL0019692	277580	272180	263040	272910	280940	265130	292750	300040	303890	270260
2_GL0037426	452730	459710	435920	444950	469540	478810	479030	502260	464720	491960
2_GL0048758	76903	48886	79032	60119	63017	63796	71877	67787	78668	94123
2_GL0058400	1131900	1056400	1095400	1027700	1136900	1068700	1107900	1024500	979010	1072300
2_GL0075727	1095600	1149200	1098200	1092700	1183900	1129500	1049500	1140100	1139000	1115800
2_GL0091357	51482	38253	53361	51200	51918	51713	54358	52328	57628	39601
2_GL0099541	245190	235400	245630	239110	238380	258010	241690	261470	238970	274610
2_GL0109744	463880	316340	406460	449530	320860	516300	514860	451350	700980	654870
2_GL0125294	241430	252430	269310	228340	281970	235300	250330	234880	278660	282480
2_GL0136960	111640	125760	145090	123770	130610	119200	123600	98660	103490	117110
2_GL0144406	48293	43493	36958	30091	42530	50591	30450	79318	30124	50069
20_GL0002468	138130	112250	113580	146570	125180	132700	115070	124240	163890	171420
20_GL0002873	13810	9731.5	15984	16086	13189	11631	15793	15918	13226	12160
20_GL0003781	2869800	3001600	2876100	2840500	2878400	3033400	3075800	3255800	3042600	3119200
20_GL0005549	458360	443460	442860	450360	437880	481330	472290	479980	479600	525480
20_GL0008685	596.31	NA	525.67	567.8	620.31	505.42	603.27	677.43	176.04	675.67
20_GL0009341	87499	103310	102080	77427	87160	86344	86276	105160	87000	107710
20_GL0009554;5-8_GL0109980;1-1_GL0028661	527980	481960	508350	555740	548480	530950	533190	547650	501080	557810
20_GL0010443	436750	453190	424290	428540	438920	455230	445480	438830	470780	522190
20_GL0010568	66740	64427	61132	57998	60573	64051	64646	67801	74197	76809
20_GL0011174	129880	120400	118800	128160	117230	117490	124780	131450	134830	119380
20_GL0014719	110890	108360	109250	104340	110020	94582	98909	113900	119160	100620
20_GL0015768	502330	528340	535780	521280	514440	525890	548620	488620	461630	507470
20_GL0016446	117340	118720	108470	109880	108540	97843	95571	114550	102430	92086
20_GL0017935	36101	38070	34759	33566	40089	38986	43157	32947	37912	46329
20_GL0019808	586890	589090	704180	610440	601990	648680	647990	634870	656560	686810
20_GL0023401	227060	204760	217100	245280	281520	268400	297890	282270	297970	280350
20_GL0023675	251500	256060	256110	263770	246730	267530	223860	229570	268370	308940
20_GL0024012	197010	163590	155330	182300	183230	175540	184540	192440	203730	239170
20_GL0025621	41137	27758	29502	42245	33728	38999	34585	2880.8	17692	16298
20_GL0027333;S-Fe8_GL0149064	75590	363350	34422	35266	118180	40577	46952	43255	148360	40814
20_GL0028243	428570	407160	386520	418160	378090	393330	409100	432170	404940	439520
20_GL0029051	60159	58592	62970	54552	56567	66195	64330	65478	62671	57424
20_GL0029566	91914	78426	79309	91354	86709	76915	89908	89749	101070	69337
20_GL0032073	117300	134760	130860	121850	115650	109300	128680	127090	89046	123080
20_GL0037201	137870	136690	140730	136190	150120	158200	146990	179300	152610	185890
20_GL0037957;1A-dyr4-07_GL0079686	680520	673170	656550	652450	644910	702590	606770	669670	650240	671710
20_GL0038208	81223	95691	73404	77360	85196	85689	80663	87883	95460	92997
20_GL0040658	481350	528070	500610	503370	496990	526180	524410	566870	593220	604980
20_GL0041115	6571.3	9758.7	8668.5	7496.4	6778.6	6777.8	9960.3	5280.7	8410.5	5615.7
20_GL0041194	456720	490210	495700	548710	487350	462910	485630	471850	419180	384740
20_GL0048707	549920	506370	600590	525240	523890	514510	517920	559970	570340	564290
20_GL0049210	143370	132670	145920	147390	155050	163500	137770	135880	128090	136250
20_GL0052656	361380	380960	372740	356910	377800	382570	334910	385240	375530	383480
20_GL0053555	284350	279200	273050	286840	308690	294480	284550	317330	300040	334000
20_GL0054119;1-1_GL0104706	14319	18406	16435	18087	15416	17217	17278	16437	19374	18102
20_GL0054153;17_GL0083926;2A-dyr14-07_GL0067403;S-Fe9_GL0291491;Group2-6A_GL0076595;1A-dyr2-07_GL0001235;17_GL0130412;17_GL0063405	66832	76088	93311	83598	74837	78236	76285	79070	76606	91562
20_GL0054836	169140	119630	139090	133870	145840	134780	129440	137030	150040	117340
20_GL0059666	349850	349770	356820	330390	334140	332730	342030	346450	323910	355320
20_GL0060803	36739000	37446000	37663000	38937000	39019000	39508000	37535000	37192000	35520000	40562000
20_GL0061686	52246	54040	52801	48165	44504	43513	44122	32354	42233	41405
20_GL0062175	403930	380190	397190	390260	374840	435710	391240	427230	405950	423840
20_GL0062363	469100	407760	407310	423940	427600	430020	442900	462870	504310	504630
20_GL0063005	34341	27072	31315	34976	38003	33046	26175	51851	37967	37536
20_GL0063644	56748	56955	53881	53798	52397	55325	48733	59241	55812	52245
20_GL0071933	65177	60787	77779	81870	65183	74714	69423	55324	61769	47467
20_GL0075446	10429	12129	4528	16362	11475	11201	3812.4	11927	15803	12981
20_GL0075449	990680	1099400	1109100	1138500	1078300	1170400	884390	1007000	888600	1051700
20_GL0075489	117640	120160	115140	134590	129470	118470	143180	128500	155440	128640
20_GL0076783	790540	767580	875530	758210	747500	829630	741230	653160	788030	624650
20_GL0082096	1744200	1743800	1686700	1710300	1832400	1817600	1747700	1673400	1729700	1985900
20_GL0086333;7_GL0080347;Group2-8A_GL0128941	226490	160700	224530	184880	241380	216370	269070	249160	276730	269780
20_GL0086411	312030	297350	265060	286300	297310	326040	254580	337990	320110	387040
20_GL0090419	1121100	1133800	1247400	1157600	1151500	1090300	1148300	1055400	1094800	1022600
20_GL0096466	332530	357480	314380	325010	351290	370370	369120	263890	376790	379150
20_GL0098510	556000	556850	546760	558230	561200	566610	553660	562020	571280	574950
20_GL0099725	390320	395490	373680	408430	393650	389200	416380	392960	396140	335580
20_GL0100113	976170	1009500	944360	1124500	957780	877780	1055800	880060	879620	871090
20_GL0100646;1-7_GL0129238;S-Fe10_GL0110934;S-Fe10_GL0027232;MC-6-2_GL0125781;MC-6-1_GL0076511;MC-0-1_GL0097529;MC-0-1_GL0000892;G1-1A_GL0068698;40_GL0008478	105020	109690	118870	111830	107840	100760	104660	90944	45365	31571
20_GL0101824	457430	455060	433840	445240	437080	423770	459100	419950	444110	452320
20_GL0102855;26_GL0124273;17_GL0117854;17_GL0097567;26_GL0098299;2A-dyr13-07_GL0028092;Group2-6A_GL0027993	111710	82538	142330	108740	103430	108230	110400	90200	86863	120560
20_GL0103470;S-Fe7_GL0257815	176520	189830	174240	177500	168910	205730	192140	192030	180640	211020
20_GL0103614	61867	63676	5486.9	71964	72549	74471	75389	72853	69815	89182
20_GL0105336;8-2_GL0112663	254180	234430	230160	230490	236100	252050	237780	238520	271310	289740
20_GL0108700	18907	17644	21847	23008	15923	1189	20282	15892	25030	12436
20_GL0110130	23559	22170	27660	26102	25898	26451	26446	33079	30067	32311
20_GL0110156	597650	637870	628760	626790	618270	660090	577220	578540	628870	642740
20_GL0112071	596790	579520	575170	585080	562680	632350	507430	585630	573330	661490
20_GL0112751	274520	253930	263010	261500	265120	280990	276450	319950	286530	334660
20_GL0114457	46381	41307	43693	44446	44303	42362	47467	49732	46223	48959
20_GL0114520	94720	93650	97057	108730	94144	115880	94545	124050	114810	117160
20_GL0115411	739840	289110	293850	585310	840150	429640	233590	332880	1037300	347470
20_GL0118731	284300	270530	268430	279040	284710	285070	266510	275030	280680	294080
20_GL0120325	46530	46180	41746	46634	47402	47396	53468	42042	51022	52509
20_GL0121992	84982	136560	135920	149200	123010	105310	133600	183240	110500	95419
20_GL0122417;11_GL0131220;Group2-7A_GL0012768;6-2_GL0045494	321610	308610	318660	327520	303410	309220	325460	326430	333720	316240
20_GL0125594	428220	434180	397340	430710	429690	381190	381750	371910	431320	307320
20_GL0126153	486620	186060	702470	152540	393690	797800	540790	1380900	535370	NA
20_GL0128104	113860	107530	109820	93596	99301	113150	102980	111350	103810	122960
20_GL0128292;11_GL0033535	14720	20596	22202	26421	21313	17716	63211	NA	34092	36001
20_GL0129676	975610	938520	1001500	929420	843560	1050500	876020	1087000	1066900	1193400
20_GL0130302	2050.2	2065.9	1649.3	2196.4	1594.7	1456.1	4743.9	3061.4	18823	1857.6
20_GL0131076	1718100	1498400	1617200	1641300	1645900	1460000	1448100	1409500	1343500	1183000
20_GL0131578	59131	54868	58045	35853	47784	39634	35056	46790	49515	26384
20_GL0132005	113130	120290	102480	112790	116120	107540	69542	117140	99515	79032
20_GL0134575	405630	392410	415900	342420	343930	311750	345590	389520	343410	373030
20_GL0137114;17_GL0100890;S-Fe2_GL0046547;S-Fe1_GL0109407;4-2_GL0039027;S-Fe9_GL0218513	65475	54811	57397	55476	65919	73312	45937	66934	72448	69643
20_GL0139296	39621	40892	30753	38465	48479	43326	42549	51827	NA	53227
20_GL0140601	4521.5	4118.2	4762.3	4187.3	4021.6	4427.6	4838	5869.4	4704.8	4715.5
20_GL0141044;7-5_GL0045867;MH-6-4_GL0062157	150430	173170	164020	175610	152840	191400	148080	181600	161700	174210
20_GL0144797;5-4_GL0059287	706880	667420	675350	708850	686460	663020	685630	693940	605460	570920
20_GL0147742	996320	1014000	1070100	1055000	1073400	1044000	1102200	1079200	1087700	1125400
20_GL0149676	52132	46338	45614	38790	43700	48142	37996	42631	42506	49140
20_GL0150260;26_GL0110301	173870	173300	179380	184160	189740	189750	187220	171050	209620	163170
20_GL0151793;S-Fe8_GL0182684;MH-6-3_GL0045414;Group2-7A_GL0109277;MC-6-5_GL0029895;MH-6-3_GL0002555;1-1_GL0053280;Group2-3A_GL0116303;Group2-6A_GL0112269;41_GL0079325;MH-6-5_GL0015097;1-2_GL0127586;S-Fe7_GL0106544;1-1_GL0108808;38_GL0029624;S-Fe7_GL0050647;MH-0-4_GL0053297;MC-0-1_GL0109708;MH-6-3_GL0136632;S-Fe6_GL0125476	102030	94661	92735	105870	109780	101890	103090	104730	107050	137300
20_GL0156552	928880	931840	934660	952810	936420	966610	993170	1023500	976970	1038800
20_GL0156837	528010	513520	551150	550070	548920	517990	521030	541460	510000	504460
20_GL0160305	7156.5	13513	NA	11019	17484	3671.9	691.83	7529.6	NA	5031.5
20_GL0161385;S-Fe7_GL0266673	6574.2	12224	12770	NA	NA	5348.9	2726.8	NA	4057.7	3610.6
20_GL0163312	170850	214000	234380	251250	193780	185940	188920	165250	167200	125000
20_GL0163715	491540	465310	466850	524860	533630	446150	443070	509170	484890	524230
20_GL0164740	121770	128210	123810	121040	126980	128960	150620	126420	136640	159380
20_GL0165003	17521	24557	14819	15375	4896.2	12364	10996	9244.4	1285.4	16263
20_GL0165667	103410	108440	84730	97352	102100	118510	106810	80044	101250	108420
20_GL0169665	1072400	1097600	1130800	1123900	966230	1134200	907410	908980	934660	1048800
20_GL0170323	42526	33797	27181	32140	23688	28087	31869	37306	44536	38280
20_GL0174229	344870	349250	333370	371850	363330	354250	336750	366590	352420	356990
20_GL0174232	51153	32314	34842	23405	32483	12067	43728	105210	NA	63355
20_GL0174234	208000	231340	225790	216290	209960	223630	205440	224920	217860	230710
20_GL0177940	58189	18562	15162	22082	15384	13860	15807	16289	13788	10295
20_GL0178293	278070	197790	214340	239920	233730	201590	201960	220070	273440	263580
20_GL0178642	178680	169670	166860	186820	174090	179170	174590	150750	195710	198570
20_GL0179942	9333	9122.7	8728.5	7405.5	7685.6	9693.8	9925.4	9418.8	10210	9223.7
2-1_GL0000285	32040	30152	28722	35209	32648	40634	31790	40864	34490	30451
2-1_GL0000668	105000	102160	101370	108040	112500	121840	111120	126780	117030	135980
2-1_GL0000769	929660	1002800	1142600	1069600	1155400	1051700	1006900	1135700	1049600	954420
2-1_GL0001288	179570	178020	173440	175830	184460	181590	163150	158720	166680	152850
2-1_GL0002791	231940	227020	229960	230980	233070	247700	210610	219970	218810	227800
2-1_GL0004454	837530	851330	857030	873810	891550	919680	887050	870610	811230	873690
2-1_GL0004689;31_GL0065912	177150	156560	146800	170950	164840	199750	161640	182080	169040	177220
2-1_GL0005243	1089500	1040900	1103800	1096400	1166600	1090900	1132800	1147300	1156300	1148000
2-1_GL0005249	530720	478670	508270	498170	491520	490340	548120	496770	529160	553400
2-1_GL0006662	74380	68731	72405	60134	49905	77572	61320	55134	50258	72648
2-1_GL0006967	607200	973250	819340	948620	840000	583010	699470	738240	700010	404070
2-1_GL0006988	614240	605890	597130	617530	570970	570300	641330	593840	580610	585330
2-1_GL0006992	220020	208290	215480	214190	237410	251910	228350	223120	204130	242450
2-1_GL0007366	NA	17033	14095	21424	21534	16557	18613	22883	11839	3885.5
2-1_GL0008249;8-2_GL0062281;5-4_GL0018213	53603	48390	43363	39126	52419	55930	55358	36535	55289	65992
2-1_GL0009313	253920	217530	244030	258820	274260	267390	261890	251550	236280	245430
2-1_GL0009411;20_GL0046769	495880	458390	476680	473610	486620	473510	437830	519940	475550	478740
2-1_GL0009413;1-1_GL0047300;S-Fe12_GL0083542;2-1_GL0087633	380590	345800	396360	344760	319200	389470	327290	340310	360620	396610
2-1_GL0009421;5-2_GL0102415;2-1_GL0087625	1578900	1639700	1666000	1687800	1624500	1639500	1412500	1551600	1442800	1475400
2-1_GL0009642	212690	212320	177000	234200	218030	215460	215430	200640	204000	200450
2-1_GL0009700	230370	224940	282420	310010	257070	249250	240960	233990	262590	243480
2-1_GL0009701	341150	346170	315160	335510	347390	358070	363080	330530	326440	341830
2-1_GL0009703	97546	102390	87739	90959	102650	108960	73373	46120	52382	71572
2-1_GL0009760	1177100	1248800	1292900	1273700	1109400	1213200	1192800	941500	1014900	1086300
2-1_GL0010167	534520	559590	555790	626140	579630	603730	592290	583360	533540	509830
2-1_GL0010197	1003900	987350	982300	974390	950780	983360	1028300	967220	1010300	1027800
2-1_GL0010247	344800	326280	349370	364470	357440	325000	367300	342290	315450	367710
2-1_GL0010886	12638	15205	22344	15835	12353	12399	20164	6399.8	18892	27077
2-1_GL0010887	225920	211720	217370	214300	216760	204620	208670	212560	211030	188100
2-1_GL0011115	153790	120770	121810	132890	130360	144270	143450	130500	155030	131270
2-1_GL0011438	17742	27859	25072	35507	30414	30701	29876	29759	28902	34003
2-1_GL0011849	10984	8565.7	12336	10227	11074	10165	8009.2	12572	12921	12863
2-1_GL0012023	132850	168930	152020	127620	148600	129670	120510	121700	135480	88294
2-1_GL0012776	115360	89539	76876	87719	101230	81348	89907	113110	111130	81913
2-1_GL0015007	718140	716030	689050	727840	678950	713130	730810	747380	728320	736210
2-1_GL0020053	88304	52971	76024	69088	79198	35089	73678	65683	64363	112570
2-1_GL0020071;MC-6-5_GL0093809	71867	87410	59612	89622	49188	58566	50358	48461	87686	39985
2-1_GL0020085	33926	36054	33839	35438	40981	35357	35470	38774	42111	46808
2-1_GL0020961	100590	90807	96068	101930	101710	94435	106480	97935	96175	72876
2-1_GL0021062	17514	25478	19467	17270	16759	16698	21924	19270	15501	NA
2-1_GL0021252;5-2_GL0101286	62937	32807	46317	34624	46878	62023	44451	47105	51521	52233
2-1_GL0021623	1490.5	1122.8	10258	1767.7	1665.7	2242.3	1992.4	994.27	910.98	6952.1
2-1_GL0024446;2-5_GL0012958	165590	176450	161090	160130	168390	174970	156060	176020	160300	176560
2-1_GL0024451	138740	136410	120950	133320	145440	146190	150170	136900	143500	138730
2-1_GL0024466;31_GL0056107	277750	310710	301020	341210	305900	356190	329240	311910	333010	344500
2-1_GL0024475	487750	467210	460700	470730	508980	557610	488760	524940	519020	540750
2-1_GL0024477;31_GL0082075	2943000	3048900	3093000	3136700	3099000	3143100	3106800	3128200	3036800	3201900
2-1_GL0024479	491170	455950	471680	470270	450310	487670	407610	405610	440690	476150
2-1_GL0024480	142120	102460	73573	124680	141480	149760	140670	159900	168920	150230
2-1_GL0024490	2106600	2109900	2080700	2116300	2012100	2008100	2139800	2367300	2220600	2324500
2-1_GL0024923	24222	28035	26425	28187	24328	31081	29212	27660	25715	30546
2-1_GL0025618	191560	185620	188800	189770	170810	188620	175670	199900	185880	205220
2-1_GL0025625	77475	82574	79100	82921	72540	90186	88364	74353	57500	92709
2-1_GL0025767	618710	567370	592830	663530	664770	688160	689420	626350	664420	679820
2-1_GL0026526;31_GL0090396	1658500	1623000	1695900	1699900	1611600	1624000	1656600	1485000	1520500	1473900
2-1_GL0026530	84652	81581	80020	75924	97013	80164	91169	83722	83308	88025
2-1_GL0026536	791590	782410	844540	793100	783080	852470	740500	790020	751180	708850
2-1_GL0027603	109690	107430	139830	187000	100510	104950	92431	114120	105200	113940
2-1_GL0028796;4-1_GL0047515;7-1_GL0005029;5-4_GL0037331;MC-6-2_GL0018649	38198	38552	33670	27384	34779	38203	36362	34229	32156	31658
2-1_GL0029142;5-2_GL0034803;2-1_GL0063176	3157.4	22775	19710	26945	28234	25710	21071	2911.9	8968.3	1890.7
2-1_GL0029154	765430	749100	721090	750920	726430	801520	733420	780990	783700	792730
2-1_GL0029307	319680	303540	341920	306220	290970	394040	386450	353770	400710	425100
2-1_GL0029363	33329	35692	40088	35648	46155	39326	36286	48205	33498	36721
2-1_GL0029805	NA	241100	316860	336240	294370	266250	282140	255250	198550	235070
2-1_GL0030751	37249	29087	33120	16782	10197	43695	21951	31528	34973	50648
2-1_GL0031200	NA	NA	NA	NA	NA	NA	NA	NA	NA	NA
2-1_GL0031408	928720	950210	938220	918930	947740	1021300	892600	966750	924570	996420
2-1_GL0031576	236230	123210	128030	196790	199280	176610	215580	180550	250030	183600
2-1_GL0032220	472410	471610	460040	471090	449930	438200	466080	466720	437320	481340
2-1_GL0033208	322130	304700	276870	314770	300290	314470	319200	340940	321590	344710
2-1_GL0033262	68638	53629	56750	70188	47179	61493	56919	50242	48569	67557
2-1_GL0034812	221650	217850	221190	226740	227780	229260	236360	201260	192040	216970
2-1_GL0036258;5-2_GL0103665	2141000	2120000	2139600	2272700	2351800	2217700	2350900	2214500	1907300	2321100
2-1_GL0036491	872680	855420	858570	884330	869900	810280	821340	885860	831640	874640
2-1_GL0037625	202860	201250	204150	262480	238180	247420	195100	214950	213490	256060
2-1_GL0039363	22867	69723	21434	18154	NA	26193	40551	28022	33451	NA
2-1_GL0039511	88928	86590	87072	80061	93029	88407	91731	93451	79923	96798
2-1_GL0039512	514310	564290	516600	326380	580890	174550	171820	225570	134620	543470
2-1_GL0039651	55807	116950	96421	79694	49244	77735	100350	77435	74580	42440
2-1_GL0042309	22764	18101	49701	104350	44438	50009	39576	23425	28453	10171
2-1_GL0042755	206720	210960	237650	248700	214190	245080	225820	198510	201690	161210
2-1_GL0043938	826190	812860	803820	818900	765810	813600	813630	816030	784110	836850
2-1_GL0045814	345840	348630	349970	362770	356570	335310	320630	299510	310430	286250
2-1_GL0046786	28634	519.99	32571	26612	22632	NA	12953	16340	NA	NA
2-1_GL0046905	920070	959450	889300	960800	914810	915850	974000	872260	767870	650780
2-1_GL0047226	298090	302320	299780	298300	328390	292660	318550	311740	286670	329290
2-1_GL0047228	230050	268870	245090	254240	250350	229030	231800	257730	235240	249900
2-1_GL0047628;11_GL0004412;6-7_GL0077416;G1-8A_GL0085502;6-1_GL0053071;31_GL0067678	608520	565250	555060	586960	594960	589940	589100	573600	605610	619420
2-1_GL0047644;2-3_GL0095440;G1-1A_GL0068928;5-2_GL0029612;2-6_GL0045970;1_GL0003708	46920	55970	63700	55683	49609	51306	38290	54254	45554	58569
2-1_GL0047729;S-Fe12_GL0048671;G1-1A_GL0033740;1-1_GL0036243;34_GL0006378;1A-dyr1-07_GL0047372	123970	115630	117690	126190	132370	131430	128390	126770	127700	129460
2-1_GL0047991	4825400	NA	NA	5251600	NA	5201400	5112400	NA	NA	5010100
2-1_GL0048386	1440900	1735000	1712600	1821400	1830300	1542600	1675100	1484000	1464100	1158600
2-1_GL0048884	100580	102300	100710	97677	103520	101700	106150	109390	107240	86613
2-1_GL0049860	249390	242650	239770	237030	252170	251890	249150	247510	252240	268470
2-1_GL0050302;8-1_GL0066398	747320	754240	766190	768910	765310	778430	770440	777350	770690	794390
2-1_GL0050430	218830	215000	226610	204630	208730	216010	207170	228600	254490	247290
2-1_GL0050696;23_GL0000753;Group2-8A_GL0218094;3-5_GL0038173	24913	23924	30339	27002	31999	30609	32169	25723	25865	19796
2-1_GL0051897	0.98668	1.7436	0.069481	0.14527	0.59041	0.11749	NA	1.8805	1.7377	1.7288
2-1_GL0051898	89966	72087	88294	86804	91417	75175	85483	67971	71261	66613
2-1_GL0052075	190400	235120	220180	224850	222260	256900	224580	228360	187630	182340
2-1_GL0052080;5-2_GL0065055	239580	218790	226670	231770	229130	240290	193770	148040	209640	245510
2-1_GL0052084	663940	635020	660840	639080	622910	622450	612500	560830	613840	733050
2-1_GL0052085	81762	78298	21459	61520	82096	69033	104210	34507	65979	81840
2-1_GL0052359	NA	NA	NA	327910	305180	NA	NA	NA	473820	NA
2-1_GL0052492	1185400	1157900	1133300	1249200	1243000	1238800	1205900	1194800	1150900	1249200
2-1_GL0052682	362420	428590	375220	443820	465980	477160	430510	465850	431740	498320
2-1_GL0054607	327470	372450	377290	346660	336850	328910	352070	383970	370840	424920
2-1_GL0055223	5895600	5375900	4619800	5578300	5317800	6017400	5091400	5577300	5930600	6167800
2-1_GL0056143;8-1_GL0121720	211050	190130	215080	212240	207040	225500	210050	220770	209970	203700
2-1_GL0056349	732710	746490	657380	741550	778130	795480	766400	793060	771620	812780
2-1_GL0056880	328780	317260	323520	305220	402460	280430	351390	331750	326020	364470
2-1_GL0056886	320510	323540	319730	343570	325880	338150	327430	346150	328570	357440
2-1_GL0057479	275750	267520	256370	252630	247240	269640	253640	273610	265890	282000
2-1_GL0057480;17_GL0071818	330600	285170	286350	266870	218730	290120	241280	257670	241020	320310
2-1_GL0057481	1597400	1556700	1503000	1635300	1724300	1644600	1522500	1796400	1874800	1881800
2-1_GL0057678	38644	18251	26908	26150	49304	39943	28577	22326	38699	29742
2-1_GL0058375	134760	131920	136300	100980	132850	141210	129310	142060	162210	151380
2-1_GL0059318;5-2_GL0083784	18323	15979	15465	18040	21450	13044	9167.8	20037	16558	15635
2-1_GL0059320	456700	464190	463630	491800	472870	501960	490220	490180	487910	517690
2-1_GL0059565;S-Fe8_GL0160863	700810	712820	684880	682670	673360	659020	679390	595290	685840	504450
2-1_GL0061088	712080	703810	684680	728470	713570	733090	730380	703540	719220	804780
2-1_GL0061095	57087	54156	46726	35660	33134	54228	49785	45985	50813	56144
2-1_GL0061307	857890	855030	808460	814440	787500	798350	727630	800300	846340	857830
2-1_GL0062493	269830	277350	126070	377510	33138	254890	327250	245150	368150	287810
2-1_GL0062746	181980	173640	194970	170700	158910	193420	173020	165040	181080	196270
2-1_GL0063170	334970	350560	335440	352620	375020	377810	348900	343580	338820	376010
2-1_GL0063224	13356	13029	13491	11546	12489	13149	11187	11688	12850	16499
2-1_GL0063845	115210	119710	124800	120020	119810	138830	128870	121240	116800	128060
2-1_GL0063846	288950	346340	334330	317380	376370	301790	336310	346000	313970	301840
2-1_GL0063867	624370	586070	556980	584660	592940	594250	582720	625710	626270	622020
2-1_GL0064618;31_GL0018182	431810	431930	402450	420380	405350	406240	423680	452940	421800	472430
2-1_GL0064620	116490	137090	164500	153320	141740	145070	147750	130020	112230	89120
2-1_GL0064815	201820	153710	147470	153070	165940	174990	183010	183750	220530	208380
2-1_GL0065396	1389900	1360100	1388300	1447600	1433500	1392300	1395500	1424100	1421600	1461000
2-1_GL0066566	319140	365650	341330	327590	321260	330590	331310	312690	323560	343390
2-1_GL0067158	1632300	1657400	1627700	1716600	1734800	1705000	1705700	1699700	1684400	1721300
2-1_GL0067955;5-2_GL0015477	140290	97376	160720	111500	120380	109770	125360	109900	106690	61165
2-1_GL0068363	999660	1063800	1054900	1031300	1069000	1036000	977660	1069600	1069000	1093900
2-1_GL0068385	167160	45854	51027	NA	50617	44369	26160	49935	39554	103530
2-1_GL0068386	76804	67099	63590	70328	81949	83352	87963	99256	83871	102690
2-1_GL0068730	68443	76323	84879	43582	78658	63006	81498	75806	88433	61480
2-1_GL0068896;1-2_GL0064638;MC-6-3_GL0093400;S-Fe20_GL0151347;S-Fe10_GL0002382	76693	75454	66875	65413	62591	62746	70111	63415	77625	61262
2-1_GL0069145;MC-6-1_GL0108415	23478	35410	38647	21291	60914	22122	20009	27230	26576	14270
2-1_GL0069415;S-Fe12_GL0187600;G1-1A_GL0042835	703220	918110	768420	734280	739700	619150	714360	739150	840310	873100
2-1_GL0070543	343340	395670	371050	306070	328690	377210	296700	299230	344360	381770
2-1_GL0071086	1483300	1532000	1146600	1657700	1527200	1406700	1711200	1508100	1365500	1394400
2-1_GL0071457;S-Fe6_GL0031620	840790	842440	921310	856430	798020	865770	852530	765080	735060	719780
2-1_GL0071461	27231	33983	29438	31377	32342	29603	33713	32959	34889	32637
2-1_GL0072207	208440	219580	222100	192710	179130	210090	188290	206950	187250	203420
2-1_GL0073193	145180	121070	139850	123370	140000	162490	128700	144860	126490	136980
2-1_GL0073987	149950	138900	150870	153610	155760	153530	161320	153590	150520	150330
2-1_GL0074921	101400	89378	102930	90894	94357	110130	89815	107540	107950	135800
2-1_GL0077441	582380	551460	550950	605310	534450	550820	531060	578320	515000	573110
2-1_GL0077992	7617.2	5583.4	5625.5	5546.2	6609.5	9782.2	6977.6	5990.2	8410.2	4264.7
2-1_GL0079956	62912	54485	52330	50374	49096	51064	50751	71651	62593	59261
2-1_GL0080115	517310	508470	487150	462650	478010	512640	490130	507710	523690	536480
2-1_GL0080403	627870	563060	548890	514610	530100	556930	597450	600800	582440	627190
2-1_GL0082032	148980	157820	220150	193450	139630	206570	NA	202000	156540	156110
2-1_GL0082133	32170	33749	29486	28792	8879.2	13312	29299	27145	32476	28040
2-1_GL0082143	204350	223090	228300	241980	233460	233520	218760	222740	203560	203920
2-1_GL0084435	86279	94664	64019	62982	52645	71746	50255	44061	77002	87072
2-1_GL0086392;14_GL0110599;1-1_GL0030056;5-2_GL0064278;4-3_GL0042365;2-1_GL0067568	15825	31780	23234	19473	33133	20188	14711	21960	13993	42805
2-1_GL0086441	604880	643920	630290	612280	618170	600870	624700	595790	614780	658290
2-1_GL0086447;31_GL0016479	197010	172870	168940	165780	172410	186490	194050	131430	147030	175600
2-1_GL0086496;5-2_GL0015473	811430	777000	832910	822070	819580	858030	837850	840850	841530	878320
2-1_GL0086497	1229100	1045800	1134700	1355300	1216500	1220900	1180900	1024300	979380	845200
2-1_GL0086498	875660	769730	747580	809760	829020	848040	875530	838190	947470	967620
2-1_GL0087205	539820	531100	537680	538350	561650	553520	519350	531410	533370	572870
2-1_GL0087623;5-2_GL0102413;2-1_GL0109054	197510	162670	178560	178800	178630	179950	206880	229550	228020	197540
2-1_GL0087635	795830	729620	787150	762330	836900	801730	830920	752360	850870	871510
2-1_GL0087636	99822	66393	75160	82057	60276	80894	76578	82664	77272	84835
2-1_GL0087638	177150	121700	146200	152410	140220	124730	132390	106150	112950	65443
2-1_GL0087705	81202	81902	76847	78506	75583	62647	63762	75414	85203	81594
2-1_GL0087710	67559	69453	67094	65215	63585	68987	68301	69182	71324	85139
2-1_GL0087711	154220	164380	166920	162530	143660	158850	150210	138780	135480	145370
2-1_GL0087715	33124	31401	27913	37816	30922	40949	34041	32405	43086	28644
2-1_GL0089416	659610	619920	573140	534010	547550	606860	525580	581780	620890	637160
2-1_GL0090550	17065	NA	NA	29099	12212	NA	8235.7	13298	NA	19605
2-1_GL0091350	407030	392700	410890	423170	412400	406900	393150	397380	376890	419400
2-1_GL0091352	140000	125400	124450	130840	135240	140950	138550	142990	141350	139660
2-1_GL0091359	129440	80205	80561	92875	105050	99840	102770	94318	122940	129870
2-1_GL0091641	52755	53164	56658	60373	56229	56316	47436	56777	42962	28946
2-1_GL0091811	409720	361710	393510	430350	401820	401040	408150	381330	403370	406780
2-1_GL0092823	371810	357200	365990	339670	373200	384840	353280	378190	390420	351650
2-1_GL0092825	84415	102230	94605	31786	54881	85470	113980	105290	78184	53100
2-1_GL0093175	181210	173460	180250	188960	175120	176830	182330	175360	171840	163100
2-1_GL0093184	71391	64854	66969	65533	68919	70331	80912	72396	76594	66493
2-1_GL0093185	271700	242950	257760	243060	254510	249380	248000	254890	252450	240460
2-1_GL0093187	1978800	1962000	2029200	2095600	2034200	2064400	1983900	2030600	1998200	2085400
2-1_GL0093189	47099	39024	26728	71162	40637	42828	60928	19583	NA	1914.9
2-1_GL0093194	156800	125910	124470	138160	133700	151960	128420	150050	164470	172580
2-1_GL0093764	29489	23253	24684	33446	34859	29064	23755	39178	28294	28428
2-1_GL0094538	29312	26311	28027	27857	27886	24723	24326	25249	26606	13924
2-1_GL0095220;2-1_GL0043783	1579400	1545200	1615900	1652900	1622300	1750900	1622200	1719100	1735800	1673100
2-1_GL0096565	363.97	NA	377.49	NA	17295	17840	NA	18661	439.25	18397
2-1_GL0096566	103560	92731	94008	98237	104620	120860	119950	132050	123580	133780
2-1_GL0098741;2-1_GL0053158;S-Fe3_GL0197601;Group2-4A_GL0106292;2-6_GL0036819;Group2-3A_GL0097538;35_GL0002304;2-8_GL0019958	1325500	1331400	1351500	1330200	1359700	1281900	1348500	1428500	1388200	1432400
2-1_GL0099634	81925	51065	56267	55727	53029	60600	39689	68066	63179	94338
2-1_GL0099638	22606	27897	28444	18991	20759	22592	24952	23706	26425	20846
2-1_GL0099646	638960	618250	639410	561790	606360	688770	700020	698120	632670	636880
2-1_GL0100020	358560	353970	312570	305260	265570	338680	312500	336230	347710	362860
2-1_GL0100797	11911	32130	7390.1	5429.1	3537.7	13328	5053.2	8712	6869.7	5849.8
2-1_GL0101074	102500	90184	92894	107940	129730	114050	94877	119460	104950	65314
2-1_GL0101233	35266	26810	47077	43965	41862	35185	40646	36043	26403	34432
2-1_GL0102243	442570	407590	421310	432350	427090	427800	445870	452890	477950	510290
2-1_GL0102246	20954	19269	20052	17891	20554	24048	23672	28484	17923	31471
2-1_GL0102249	133440	134310	116740	137750	140940	151550	142170	140910	147420	158120
2-1_GL0102347	612180	622120	748290	747850	623600	598120	626110	571010	572090	555700
2-1_GL0102389	556640	546060	576800	588290	571860	577740	562120	549230	550600	552180
2-1_GL0102390	73013	73471	76264	79483	72951	76227	57303	61348	56094	58572
2-1_GL0102392;2-1_GL0100511	220460	212160	211090	228550	227870	214040	213060	218610	203840	211600
2-1_GL0102395;20_GL0006363;1-1_GL0008645;1_GL0011591;2-3_GL0062050;8-1_GL0061360;6-2_GL0004784;S-Fe12_GL0209882;1-2_GL0119759;MC-6-2_GL0065858	77917	66754	73103	81683	62689	66545	58898	41872	44462	24409
2-1_GL0102471	88008	45576	51727	47045	50546	47717	66103	49895	55760	20582
2-1_GL0103051	466990	474900	507070	435510	468030	451630	429730	475850	462850	398130
2-1_GL0103436	84446	86051	83217	79024	74049	84886	70369	86273	82836	90150
2-1_GL0103739;G1-1A_GL0051997;6-2_GL0036741;3-5_GL0040884;S-Fe12_GL0080717;1_GL0086842	682870	642360	648490	652120	680750	696570	767240	758130	837260	810240
2-1_GL0106075	45915	52059	56690	56769	57454	58031	64184	67868	60192	48496
2-1_GL0106087	186250	224100	194900	175780	185320	159750	144930	186550	141340	169610
2-1_GL0106098	227090	245690	249570	247820	240890	246470	245310	237550	229230	275660
2-1_GL0106280	396490	396140	398000	384860	361860	299090	318170	336720	285130	325120
2-1_GL0106619	3781100	3890200	3837100	4006500	3936700	3886400	3890900	3749600	3758900	3779900
2-1_GL0106621	166280	152090	152060	163760	162130	169800	148220	159050	156100	180230
2-1_GL0107798	833130	796980	823200	848610	850510	859650	857030	848870	809140	843820
2-1_GL0107809;5-2_GL0005981	83637	59263	54434	72293	78699	81292	76913	80648	84558	75972
2-1_GL0107926	343900	134130	316890	195940	292660	313400	314450	269500	540310	785730
2-1_GL0107966	327470	307400	327330	333700	342210	339490	335180	347140	330110	350180
2-1_GL0109469	142190	138030	134980	137070	141800	136480	140190	151220	149640	155200
2-1_GL0110697;5-2_GL0041195	394120	380240	399670	393690	397530	417560	373730	388710	378100	397780
2-1_GL0110699;5-2_GL0041197	217000	163700	217820	215970	205170	155030	190480	168070	184780	138570
2-1_GL0111147	331840	320140	353830	347650	352030	340570	358880	358800	337310	266440
2-1_GL0113853	198990	225720	202320	199860	203700	211040	178290	208240	187280	237150
2-1_GL0114667	54914	42513	59479	57896	60212	51844	45880	42130	43174	28061
2-1_GL0114780	611830	642550	644130	626320	574690	637420	658800	633830	624050	657130
2-1_GL0114903	54392	45741	48209	43426	43896	48713	49969	56270	47538	57008
2-1_GL0114928;2-3_GL0062107	331700	299430	297360	332330	310730	315660	313990	308020	291270	313990
2-1_GL0114934	193350	160720	172900	198640	200720	180710	208860	190410	224930	264760
2-1_GL0114961	368380	362360	367010	393040	360570	383370	342650	337620	345640	348630
2-1_GL0115160	136570	149480	168600	164050	174030	173450	165660	146610	162190	183780
2-1_GL0115202	375260	346350	360050	362920	384470	464950	440790	416200	449830	446740
2-1_GL0115345;Group2-3A_GL0004536	556200	587620	580030	610480	534290	558070	555860	515470	549180	448240
2-1_GL0116556	252800	260810	183530	273710	275640	274300	281340	247930	259170	263070
2-1_GL0116859	29096	NA	26860	38407	24504	29473	36223	34310	37993	42705
2-1_GL0117668	37639	85514	107810	48544	62455	67201	NA	49113	40287	35615
2-1_GL0118102	188590	200130	195260	227290	190050	191020	192510	167560	183910	149060
2-1_GL0120205	2487200	2251700	1800600	1866300	2426600	2682100	2065200	1797000	2432200	2333300
2-1_GL0121714	45991	25658	34910	NA	29917	NA	NA	NA	NA	NA
2-1_GL0121718	497200	541110	545050	552100	539450	539680	561230	543500	569680	559460
2-1_GL0121721	121180	58185	98279	86017	80966	77571	94590	68838	82883	45113
2-1_GL0121740	40771	38435	38309	38361	40346	37284	36767	38271	40235	39267
2-1_GL0122220	66093	58452	53108	62772	65731	60274	65746	66561	70330	71120
2-1_GL0122637	1860700	1729300	1799000	1814200	1799300	1843200	1766200	1795500	1805100	1730400
2-1_GL0122922	179980	174480	166100	168160	177200	183380	182020	165680	194980	194730
2-2_GL0003534	10059	3309.3	4531.8	12163	6929.8	99402	NA	3617.5	4533.8	NA
2-2_GL0005186	NA	21997	14570	12803	17686	32726	21515	12410	29577	NA
2-2_GL0005347	164520	163930	173040	165700	171610	168580	150880	174560	160680	178680
2-2_GL0005407	283460	267240	288980	282570	293370	273080	275720	245610	283870	294120
2-2_GL0005909	104110	91765	71271	64171	NA	30273	71816	NA	20726	69501
2-2_GL0006031	23988	50654	21064	26208	29027	35282	27112	47558	31233	23166
22_GL0006093	116400	73654	92184	98947	57547	56498	71804	85008	55173	68079
2-2_GL0007249	489930	488410	468470	486640	492900	460330	467540	516220	480820	521960
22_GL0008170	29661	30064	33032	29771	24438	32612	30021	30712	25267	42452
2-2_GL0009767	1831.7	6082.2	10251	31795	3415.3	1650.2	3248.7	12280	3541.1	2057.7
2-2_GL0015544	109270	125000	109560	135090	122000	123470	103090	59972	62038	75691
2-2_GL0017765	335480	320790	318270	326070	338890	337460	339700	343670	370870	376280
2-2_GL0020629	132620	132360	138350	124130	113240	112780	137480	124790	110240	111410
2-2_GL0024037	116600	144770	138450	165220	146110	131830	138130	129200	130040	81899
2-2_GL0028420	36862	26579	22991	16069	29513	19471	22587	22660	21215	2222.7
2-2_GL0029466	189980	174720	184190	154310	193870	187570	178070	191050	208290	210800
2-2_GL0030376	922450	886560	860050	894760	943960	943310	904820	956300	918070	1009700
2-2_GL0034688	355150	373300	368370	367190	369150	361660	360330	351700	370030	365690
2-2_GL0038528	2117500	2152700	2267800	1994700	1991200	2244200	1946900	1972900	2094200	2275700
2-2_GL0040077	27028	15622	39280	39681	26633	24085	53477	23061	26814	161920
2-2_GL0043249	537590	537450	518930	518940	511200	558530	505580	583970	545060	593450
2-2_GL0043407	48866	45653	30850	34840	28773	46428	76700	NA	38459	37549
2-2_GL0045471	10691	4501.4	9864.7	11649	5232.7	3654.1	6082.5	3713.8	2642.8	11275
2-2_GL0046102	323010	314010	312400	303310	306020	315900	299370	314770	303340	326290
[truncated: 3,654 more rows]

## Sheet: DIA-NN-libE-Protein
Microbiota													Host
[truncated: 9,894 more rows]

## Sheet: DIA-NN-libF-Protein
Microbiota													Host
[truncated: 9,549 more rows]

[truncated: 4 more sheets: DDA-MQ-Peptide, DIA-MQ-Peptide, DIA-NN-libE-Peptide, DIA-NN-libF-Peptide]
