# Supplementary material for: Increasing taxonomic and functional characterization of host-microbiome interactions by DIA-PASEF metaproteomics
Source: Front Microbiol. 2023 Oct 16;14:1258703. doi: 10.3389/fmicb.2023.1258703 (PMC10613666; doi:10.3389/fmicb.2023.1258703)
Supplement: Supplementary file 9 [file Table_2.XLSX]

## Sheet: DIA-NN-libE-Protein
Microbiota																		Host
ProteinGroup	500ng-1	500ng-2	500ng-3	250ng-1	250ng-2	250ng-3	125ng-1	125ng-2	125ng-3	62.5ng-1	62.5ng-2	62.5ng-3	31.25ng-1	31.25ng-2	31.25ng-3			ProteinGroup	500ng-1	500ng-2	500ng-3	250ng-1	250ng-2	250ng-3	125ng-1	125ng-2	125ng-3	62.5ng-1	62.5ng-2	62.5ng-3	31.25ng-1	31.25ng-2	31.25ng-3
1_GL0003708;2-1_GL0047644;2-3_GL0095440;G1-1A_GL0068928	2565.05	2259.17	2917.61	1940.41	1534.19	1981.58	NA	NA	NA	NA	NA	NA	NA	NA	NA			O08528	6929.58	7765.92	7102.85	8320.81	7439.55	7247.92	8160.35	7490.25	8138.25	NA	NA	NA	NA	NA	NA
1_GL0004722;MH-0-3_GL0005477;S-Fe2_GL0170894	2427.63	2275.65	2871.89	1826.47	1872.54	1484.63	1633.15	1392.67	1908.94	NA	NA	NA	NA	NA	NA			O08528;P17710	NA	2940.8	2691.08	3031.22	3705.83	NA	3578.34	NA	2925.68	NA	NA	NA	NA	NA	NA
1_GL0010544;G1-5A_GL0097369	2197.23	1971.44	2429.76	1606.53	NA	NA	NA	NA	1769.96	NA	NA	NA	NA	NA	NA			O08529	2079.5	1416.76	1568.7	2683.38	2253.13	2586.71	2101.11	1880.99	2057.1	NA	NA	NA	NA	NA	NA
1_GL0021401	9065.19	9636.13	9646.13	9026.69	7605.77	8281.05	6989.85	5968.34	7343.59	NA	NA	NA	NA	NA	NA			O08553	3533.11	3764.89	3263.92	4536.46	4155.69	4258.89	3879.41	4036.36	3958.24	2996.93	3356.73	3656.73	2911.53	2134.45	NA
1_GL0021401;5-7_GL0063732;7-7_GL0030347;8-1_GL0083080;8-5_GL0050759;G1-4A_GL0063738;G1-5A_GL0199126;MH-6-5_GL0077975;S-Fe20_GL0017193;S-Fe20_GL0032209;S-Fe20_GL0132538	14964.2	13892.7	14345.2	13020.3	12293.2	12034	12879.3	11193.1	11963.7	6803.37	4484.83	5984.58	5949.42	5229.51	5532.88			O08573	6035.04	6483.5	6370.58	4591.65	3731.92	3798.1	4828.3	5158.69	4707.27	3810.99	3826.88	NA	4487.63	NA	2965
1_GL0021401;5-7_GL0063732;8-1_GL0083080;G1-4A_GL0063738;Group2-4A_GL0123968;S-Fe20_GL0132538;S-Fe20_GL0145210	36640.3	36165.1	NA	30980.3	35812.9	32091.3	32221.8	33172.8	35918.2	29601.2	29345.8	26259.6	29270.7	26218.7	28686.7			O08601	7151.12	6167.14	5618.37	6083.32	6640.26	6819.74	6256.17	6459.42	5667.01	6644.52	6308.01	6671.48	5325.41	7063.34	7024.17
1_GL0021401;8-1_GL0083080;G1-4A_GL0063738	8379.44	9430.52	9588.48	10053	9656.37	9853.13	10648.7	8886.8	9384.3	10034.9	10757.2	10957.2	10907.5	8899.17	9990.69			O08638	NA	3361.83	3205.19	4809.77	3790.23	3270.09	3366.59	3605.14	NA	NA	NA	NA	NA	NA	NA
1_GL0021401;8-1_GL0083080;G1-4A_GL0063738;S-Fe20_GL0132538	8715.65	11184.4	10201.8	17198.5	16958.5	18619	18271.1	20331.9	18069.7	20042.2	21680.2	25301.3	21553.4	21380.7	18618.9			O08638;Q6URW6;Q8VDD5	3148.85	3506.4	3348.24	3462.05	2686.52	3413.13	2980.36	3403.19	3121.1	2438.3	1775.2	1764.08	3047.63	2866.32	NA
1_GL0021401;G1-4A_GL0063738;S-Fe20_GL0132538	2169.27	2200.39	2622.86	14783.8	14767.7	14002.5	16587.7	15080.3	16105	15108.6	17257.8	15244.1	15773	14905.2	14197.4			O08638;Q8VDD5	6331.42	6936.67	7373.7	5577.56	5233.08	4363.65	4496.29	4207.72	3171.93	6749.1	6581.63	5059.97	5688.47	4752.75	5991.52
1_GL0029577	2508.03	2388.17	2882.93	1796.06	2046.73	2209.16	2501.15	1810.57	1974.53	NA	NA	NA	NA	NA	NA			O08688	3053.08	4060.06	3103.05	4740.87	4609.72	4645.46	5351.87	NA	4688.38	NA	21936.5	NA	NA	NA	NA
1_GL0029577;2-2_GL0131392;2-5_GL0034294;5-3_GL0028392;Group2-4A_GL0000538	8088.2	7208.79	7652.95	7773.5	8161.62	8384.5	8041.24	8418.41	8113.82	9299.74	6438.59	6321.15	5827.5	9105.17	6730.92			O08709	58643.2	49492	53747.7	60809	62235.2	62614.4	66288.3	60575.2	62955.7	68283.7	68471.1	69917.2	66262.2	63007	65776.8
1_GL0029577;2-2_GL0131392;2-5_GL0034294;Group2-4A_GL0000538	12386.4	10266	12767.6	11840.6	11399.4	11330.2	13404.7	14765.7	14187.2	10376.5	10268.5	12806.3	7683.76	6663.4	12175.2			O08749	24424.6	20968.1	20264.7	29788.2	27092.6	27969.2	26134.2	28873.7	29813.3	27202.3	25944.9	27546.5	25587.9	26017.9	26956.1
1_GL0029577;2-5_GL0034294;5-3_GL0028392;Group2-4A_GL0000538	2126.35	1730.53	1890.06	1971.18	1463.6	1500.59	1606.49	1796.5	1521.95	1458.82	1764.73	2517.04	NA	NA	NA			O08756	2299.6	2766.6	3306.1	2422.81	2043.62	2211.32	1858.43	2331.25	NA	NA	NA	1763.69	NA	NA	NA
1_GL0029577;2-5_GL0034294;Group2-4A_GL0000538	10026.5	10694	10423.8	10419.8	10958	10731.3	11785.8	10659.3	11069.8	8515.57	9121.42	10221.8	11260.3	10497.7	10864.4			O08795	4845.84	5539.64	5541.36	5850.93	6046.16	5686.36	5457.65	5296.26	5951.61	6201.48	6511.02	4421.13	4893.03	5845	NA
1_GL0029577;Group2-4A_GL0000538	NA	9036.48	5608.82	10589.3	11157.7	12937	NA	11145.4	NA	NA	8792.99	NA	NA	8423.43	NA			O08807	6612.74	7506.29	6021.29	6340.41	6545.99	7207.94	8216.14	8951.13	9134.72	8756.78	NA	9488.29	NA	NA	NA
1_GL0032517;G1-1A_GL0003105;S-Fe10_GL0023669	2370.41	2690.35	2762.79	3325.6	5343.81	4406.61	3398.68	4214.76	3325.39	4048.5	NA	NA	NA	NA	4452.33			O08807;P35700	7677.3	7861.12	5298.85	12465.1	13751.8	13321.9	12024	11174.4	11829.2	10451.5	16619.5	13174.6	20437.4	17654.9	14957.1
1_GL0036429	11622.7	10557.9	11390.6	15485.8	14090.3	12924.8	13458.2	14173.8	14411.3	10637.7	13223.7	12751.8	11615.4	14150.3	13797.4			O08810;P58252	2972.58	2733.83	2112.11	10599.2	8565.75	8698.68	12883.4	14172.2	14946.4	15465.8	15102.5	13850.1	12707.3	14235.4	13597.8
1_GL0036429;Group2-8A_GL0049193	9383.33	9202.82	10083.4	7551.17	7700.79	7615.29	8781.01	7059.7	7412.83	3920.36	3727.33	5357.96	3808.51	4824.66	3072.52			O08832	1588.81	1749.99	1875.1	1517.96	2214.68	2169.92	NA	NA	NA	NA	NA	NA	NA	NA	NA
1_GL0038377	NA	NA	NA	7975	7684.23	7481.5	9008.35	10527.1	NA	NA	NA	NA	NA	NA	NA			O08992	3045.39	4308.47	4826.94	5095.91	5216.95	5220.09	5061.11	4925.38	4978.84	NA	NA	NA	NA	NA	NA
1_GL0038377;2-1_GL0064618;2-3_GL0101170;6-2_GL0017794	NA	NA	NA	NA	NA	NA	NA	NA	NA	17455.3	16479.7	13092.7	20258.7	13477.6	17148.5			O09037	34487.3	34596.1	34008.1	38549.5	36502.9	37219	36502.1	35371.2	39885.2	26368.6	NA	13383.5	22921.6	NA	NA
1_GL0038377;2-3_GL0101170	77987.9	76635.2	77321.7	88567.7	87021.3	90183.4	70402.8	75797	75620.2	70371.8	67031.1	65336.9	68274.4	58119.5	67242.6			O09043	13873.8	13326.8	12111.1	10186.3	10843.3	10117	10999.3	9793.69	11034.2	11401.4	NA	10805.6	NA	13067.7	12487.3
1_GL0038377;2-3_GL0101170;34_GL0024708;6-2_GL0017794;G1-5A_GL0006982	NA	68795.1	NA	74661	80160.1	73698	79784.4	63297.6	94145.5	98591.7	95593.8	95670.8	94806.2	103920	95633.7			O09049	979249	916081	969150	1.02165e+06	1.04333e+06	1.01995e+06	1.00312e+06	980989	1.08128e+06	632744	544471	610914	582635	566581	589060
1_GL0038377;2-7_GL0046144;3-6_GL0039132;5-1_GL0073748	60163.8	57387.3	53319	81540.6	87200.9	86724.6	86486.9	81322.9	83444.1	77829.1	73956	78205	81857.1	70072.7	72554.1			O09061	9716.59	10119.3	8803.33	8129.65	7887.02	7425.31	7969.64	8343.11	9028.91	8575.52	7492.6	8282.16	8941.65	NA	11910.4
1_GL0041992	12345.4	11706.4	11843.5	14787.9	14287.3	13756.8	14910.4	14966.2	13959.5	15344.4	16996.4	14328	16083.9	12258.2	12168.7			O09111	701.939	NA	NA	4251.81	4536.61	NA	NA	NA	NA	NA	NA	NA	NA	NA	NA
1_GL0041992;20_GL0172070	4018.6	3464.11	3978.76	NA	2720.3	1450.05	NA	2109.89	NA	NA	NA	NA	NA	NA	NA			O09114	1215.56	1385.01	1472.96	NA	NA	NA	NA	NA	NA	NA	NA	NA	NA	NA	NA
1_GL0043524;2-1_GL0009760;2-1_GL0052492;2-3_GL0000168;2-3_GL0062071;2-3_GL0062072;2-3_GL0080940;2-3_GL0080941;2-7_GL0019013;2-8_GL0037621;2-8_GL0100524;2-8_GL0100526;28_GL0037869;2A-dyr16-07_GL0000620;3-2_GL0068898;3-5_GL0047916;49_GL0077775;5-3_GL0006268;5-3_GL0050893;7-1_GL0019247;G1-5A_GL0133398;Group2-4A_GL0005454;Group2-4A_GL0005459;S-Fe12_GL0075450;S-Fe12_GL0081748;S-Fe6_GL0169466	3558.55	3512.3	4236.61	NA	NA	NA	NA	NA	NA	NA	NA	NA	NA	NA	NA			O09117	13591.3	12270.9	11737.2	9385.18	10498.4	10421.7	10353.4	10456.5	9132.57	9897.81	11646.2	10688.4	11277.1	13503	13484
1_GL0054117	2874.98	3074.24	3215.9	3494.32	3029.57	2800.05	2576.05	2696.9	2585.17	2259.77	2251.81	1628.71	945.345	NA	NA			O09131	11954.7	13113.7	12479.3	14210.6	14838.5	14294.3	14342.7	12989	13667.2	15605.3	15448.3	15370.5	12155.6	13125	14561.3
1_GL0064176;2-1_GL0087634;5-2_GL0102425	52315.8	44932.3	49295.5	69826.5	69095.9	68102.1	72783.6	67244	73901.1	65938.1	68697.7	67629.1	71232.2	73783	67326.5			O09159	9989.69	10085.2	9930.4	10135.7	9169.62	9814.74	9601.99	9214.23	8166.21	8680.71	7907.22	9451.32	9405.66	NA	8802.81
1_GL0065332	NA	NA	NA	7550.2	8938.76	7494.63	NA	NA	NA	NA	NA	NA	NA	NA	NA			O35054	10617.8	10432.4	9446.22	11550.7	11996.6	10589.2	10957.9	12905.7	12092.2	11325	11712.2	13070.1	6249.39	6840.64	16115
1_GL0065332;6-6_GL0015877	3899.18	3821.65	3953.48	4007.41	4440.4	4289.52	4385.68	4937.3	4519.88	5932.18	4620.94	4930.9	4461.59	NA	5866.77			O35129	8595.52	7480.17	7844.04	8726.94	8923.64	9781.19	9913.8	8905.46	9001.45	7941.53	8452.49	9881.27	7002.58	6234.87	9004.71
1_GL0086419;2-1_GL0024478	18057.6	15172.6	16765.6	18577.4	18389.3	18331.4	17340.9	18318.2	18728.3	18210.9	16875.5	14380.6	14699.6	12993.9	17264.6			O35215	3245.21	3161.49	3813.74	3420.43	4057.08	NA	3187.31	2619.43	2902.71	NA	NA	NA	NA	NA	NA
1_GL0086419;2-1_GL0121718	8053.77	7203.66	7217.81	8641.45	9125.85	7045.58	9058.01	9479.24	8896.84	7159.06	8815.27	9966.88	NA	7908.02	3580.87			O35292	NA	NA	4332.44	5086.42	5346.79	4628.87	4155.47	3135.41	3861.54	NA	NA	4322.5	NA	NA	NA
1_GL0086842;2-1_GL0103739;2-5_GL0069395;4-1_GL0068194;5-3_GL0111435;5-5_GL0069737;G1-1A_GL0051997;S-Fe12_GL0080717	NA	NA	3816.33	NA	NA	NA	NA	NA	NA	NA	51395.3	NA	54804.4	52845.9	56572.6			O35295	1523.99	1862.44	1983.54	NA	NA	1750.12	1801.94	NA	NA	NA	NA	NA	NA	NA	NA
1_GL0086842;2-1_GL0103739;G1-1A_GL0051997;S-Fe12_GL0080717	8673.63	7499.92	6850.37	8803.48	10417.2	8125.6	8102.92	8177.58	9075.62	4796.91	4173.52	3877.03	NA	NA	3872.47			O35350	7733.17	7766.26	7510.01	8920.68	7644.29	8907.64	8788.49	9532.69	8996.46	8324.61	9704.02	9549.93	8702.72	7252.29	7822.36
1_GL0088793;20_GL0046722;26_GL0073244	32037.6	34336.4	31689.9	33012.9	38628.7	29952.7	37972.5	36848.7	41063.2	30326.4	33114	34104.4	33941.1	30339.7	33011.7			O35598	8182.65	8033.52	8266.94	7581.63	7744.16	7549.99	9343.55	12279.9	9702.69	6248.14	NA	6466.85	NA	NA	4700.25
1_GL0088793;2-6_GL0089672;20_GL0046722;26_GL0073244;4-2_GL0081783;Group2-3A_GL0037730;Group2-7A_GL0013216;S-Fe3_GL0084203	32825.9	32958.4	32427.4	36112.3	35684.9	34992.5	30928.9	32621.5	36045.6	27373.9	33316.1	26139.5	26712.8	25838.4	22184.9			O35639	25002.6	24790.7	24086.6	24820.9	26049	24992.8	26541.1	25501.6	25562	26031.3	24243.8	24909	21709.8	27814.2	25057.2
1_GL0092558;2-1_GL0106075;2-5_GL0058789;5-5_GL0087530;G1-5A_GL0183250	47613.6	62883.1	39297.4	60976.2	57525.9	57264.5	53807.3	58911.9	61859.3	58555.8	57068	56416.1	56388.5	59457.7	56423.6			O35640	2037.81	2036.47	2367.75	2163.81	2386.43	2345.73	2146.09	2792.3	2530.46	NA	NA	NA	NA	NA	NA
1_GL0092558;2-1_GL0106075;2-5_GL0058789;G1-5A_GL0183250	4717.47	3629.79	4465.56	4125.12	4017.83	3241.1	5450.12	4790.98	4633.75	3481.91	4184.91	3827.84	NA	NA	NA			O35643;Q9DBG3	3269.03	3325.8	2980.33	2510.89	2926.84	2642.77	1591.49	3216.33	3079.04	NA	NA	3169.66	3885.85	NA	NA
1_GL0092558;2-1_GL0106075;5-5_GL0087530;G1-5A_GL0183250	8878.03	9573.85	9678.08	8498.33	9186.05	9901.19	9632.04	10616	10389.9	7096.85	7860.59	6199.22	10493.3	9660.86	7318.73			O35657	2858.08	3244.92	2724.98	NA	NA	2833.64	NA	NA	NA	NA	NA	NA	NA	NA	NA
1_GL0092558;2-5_GL0058789	16124.1	14528.6	16901.9	11124.2	12228	11674	11050.9	13548.7	11858.1	10075.2	12613.5	11555.3	7990.59	10348.4	14517.5			O35658	5231.3	5677.36	5577.11	5349.64	5578.97	4380.88	5158.98	4273.39	4544.92	2131.64	NA	NA	NA	NA	1990.56
1_GL0095036	23998	32884.4	35880.1	29784	32220.4	26859.1	28951.1	33788	31356.8	27416.3	27235.1	31219.7	18107.5	28464.7	16716.4			O35682	960.322	932.614	1060.72	1108.06	1322.18	1438.4	NA	1153.05	NA	NA	NA	NA	NA	NA	NA
1_GL0095036;2-1_GL0087638	9072.74	7050.17	6375.03	1259.15	1852.15	1349.15	5668.3	3418.65	3214.61	1459.95	NA	293.003	1581.46	1939.75	NA			O35684	3556.96	3546.81	4226.05	4450.53	5101.18	4603.6	3412.48	3827.69	3034.69	3791.21	6351.72	3571.65	3196.27	3004.67	1560.24
10_GL0000502	3175.49	3156.06	3138.11	2259.92	2517.72	2795.26	2686.87	2244.34	1766.28	NA	NA	NA	NA	NA	NA			O35855	7516.57	6777.94	7096.16	3368.56	NA	1672.77	NA	6861.24	NA	NA	NA	NA	NA	NA	NA
10_GL0000502;16_GL0092029;5-8_GL0080291;6-2_GL0003591;MC-0-1_GL0058727;MC-0-3_GL0020201;MC-6-1_GL0032534;MC-6-2_GL0176091;MH-0-4_GL0002636;S-Fe10_GL0041507;S-Fe10_GL0076296;S-Fe10_GL0164975;S-Fe1_GL0178399;S-Fe20_GL0111922	41597.7	NA	65558	NA	NA	NA	NA	NA	NA	NA	NA	NA	NA	NA	13301.9			O35955	5166.58	5922.56	5873.72	6112.16	5230.25	5204.37	5334.04	5342.37	5202.22	5652.51	4064.87	5087.1	5734.88	4412.65	NA
10_GL0000502;16_GL0092029;5-8_GL0080291;6-2_GL0003591;MC-0-1_GL0058727;MC-0-3_GL0020201;MC-6-1_GL0032534;MH-0-4_GL0002636;S-Fe10_GL0041507;S-Fe10_GL0164975;S-Fe1_GL0178399;S-Fe20_GL0111922	63793.6	55723.1	59047.4	106591	99289.6	98522.8	106776	111317	121996	121592	126871	123394	134130	133985	133046			O35963	45560.3	45951.4	42677.8	42543	NA	43806	NA	NA	NA	NA	44116.2	NA	42111.4	NA	NA
10_GL0000502;16_GL0092029;5-8_GL0080291;6-2_GL0003591;MC-0-3_GL0020201;MC-6-1_GL0032534;S-Fe10_GL0164975;S-Fe20_GL0111922	2723.85	1383.95	1189.35	870.491	483.119	NA	731.156	NA	NA	NA	NA	NA	NA	NA	NA			O54734	6504.29	6956.54	6418.39	6876.54	6579.68	6366.24	7416.33	5988.01	6570.4	6610.43	8041.02	5606.13	NA	7236.13	7609.65
10_GL0000502;5-8_GL0080291;MC-0-3_GL0020201;S-Fe10_GL0164975;S-Fe1_GL0178399	6648.59	6206.02	6153.87	NA	NA	NA	NA	NA	NA	NA	NA	NA	NA	NA	NA			O54909	2590.6	3392.24	3288.64	NA	NA	NA	NA	NA	NA	NA	NA	NA	NA	NA	NA
10_GL0000502;6-2_GL0003591;MC-0-1_GL0058727;S-Fe1_GL0178399	6848.58	6675.03	6010.19	NA	NA	NA	5603.37	4195.64	4627.77	6715.83	NA	4111.37	NA	NA	NA			O54962	521.706	664.503	788.015	1071.45	NA	NA	NA	NA	NA	NA	NA	NA	NA	NA	NA
10_GL0000502;MC-0-1_GL0058727;MC-6-2_GL0176091;S-Fe10_GL0041507	32385.2	36690.1	34500	NA	NA	NA	NA	NA	NA	NA	NA	NA	NA	NA	NA			O54990	13540.3	14346.4	14301.5	14479.9	14794.4	15399.4	15549.8	13916.7	14254.6	17415.1	13635.1	8981.22	13358.9	21765.1	15518.2
10_GL0000502;MC-0-1_GL0058727;MH-0-4_GL0002636;S-Fe10_GL0041507	NA	NA	NA	24073.5	26669	26378.1	22262.2	18919.5	22339.9	15679.5	17767.4	14079.6	9841.05	10669.1	14213.9			O55023	8789.7	9061.86	10258	8994.54	9551.15	10095.9	8729.47	8816.89	8564.3	8435.34	8004.29	10077.7	8608.52	8630.97	9422.6
10_GL0000502;MC-0-1_GL0058727;MH-0-4_GL0002636;S-Fe10_GL0041507;S-Fe1_GL0178399	20167.6	20641.6	18941.6	20934.9	20493.2	19581.7	22038.9	18918.4	22948.5	10677	13310.8	14231.3	8517.46	10179.4	11092.4			O55029	6315.65	7478.04	6463.52	8688.98	8101.97	7822.22	7517.63	7457.93	7501.65	6948.27	6737.03	7317.37	8744.27	6575.41	6387.21
10_GL0000502;S-Fe10_GL0076296;S-Fe1_GL0178399	2885.02	2343.8	2253.35	1984.56	2229.36	2389.62	1921.8	2117.28	1878	NA	NA	NA	NA	NA	NA			O55111	3606.94	2921.83	3151.3	3435.87	3431.44	3382.33	3055.15	3040.55	3631.53	4164.64	3227.51	4135.27	2920.15	NA	NA
10_GL0000536;6-7_GL0033069	6711.79	5428.08	6657.51	3597.8	3493.08	NA	3682.62	3485.86	3530.15	2143.48	2664.47	2170.06	2751.72	2368.63	2426.59			O55125	NA	6441.53	NA	7827.17	8226.54	8164.23	NA	NA	6511.95	NA	NA	NA	NA	NA	NA
10_GL0000536;6-7_GL0033069;S-Fe18_GL0057238	8637.7	8523.09	8813.69	12962.8	12524.8	14106	9549.07	11454.8	10981.8	12536	11060.3	11337	8149.17	9210.51	9667.31			O55126	4061.29	4203.58	4623.61	5382.51	4417.46	4364.47	3838.06	3505.17	3353.4	NA	NA	NA	NA	NA	NA
10_GL0002188	7564.55	7216.19	8022.96	7983.93	8683.38	7305.18	6989.48	7116.24	7549.91	7620.25	8310.27	NA	NA	4222.82	NA			O55135	8983.03	7699.67	7896.95	7927.92	7045.96	7557.78	NA	7494	8262.63	NA	8844.54	NA	NA	NA	NA
10_GL0002401	6720.91	5819.11	6044.71	6710.69	6714.77	6287.67	4782.24	4724.74	4192.39	4431.34	3490.57	NA	NA	NA	NA			O55142	6237.65	5972.13	6337.68	8200.21	7634.76	8428.78	8355.87	10068	8351.91	NA	11028.4	9274.01	NA	NA	NA
10_GL0003402	2115.34	2551.19	2634.33	2162.89	2093.93	1972.49	990.613	1555.34	1478.42	NA	NA	NA	NA	NA	NA			O55143	4184.04	3584.11	3938.03	5132.08	4411.89	5392.48	4671.23	5168.31	5524.82	NA	5947.71	5198.6	NA	NA	NA
10_GL0005938;11_GL0040234;3-2_GL0032488;5-8_GL0064329;G1-5A_GL0001850	NA	28835.4	NA	35538.6	32600.1	NA	30504.1	30760.1	NA	21317.9	NA	NA	NA	NA	NA			O55143;Q64518	2033.26	2128.34	1832.08	1446.86	1732.48	NA	1647.42	1834.2	NA	NA	NA	NA	NA	NA	NA
10_GL0005938;11_GL0040234;3-2_GL0032488;G1-5A_GL0001850	NA	NA	NA	40156.5	40499.2	39729	41019.9	37549.2	41380.8	44933.8	45169.7	47865	46962.7	49467.4	46424.7			O55143;Q64518;Q8R429	2373.73	3045.71	3135.97	2520.3	2108.09	1826.54	2200.38	2406.63	3648	NA	NA	NA	NA	NA	NA
10_GL0009545	135838	142599	127447	167124	148994	173915	169282	157706	165240	136522	187810	156770	151837	157401	NA			O55143;Q8R429	4913.4	5257.59	5562.42	5734.73	5875.87	5132.45	NA	6572.1	6302.56	NA	NA	NA	NA	NA	NA
10_GL0009545;20_GL0000962;26_GL0111020;5-7_GL0020114;5-7_GL0076266;5-7_GL0138075;6-8_GL0073135;6-8_GL0085366;7-4_GL0099193;G1-5A_GL0036391;MH-6-5_GL0063812	2441.79	2252.72	1298.63	821.917	907.348	NA	1440.53	1638.18	NA	NA	NA	NA	NA	NA	NA			O55234	6294.08	6909.62	6634.42	7100.59	7345.48	7153.36	8029.68	7057.25	8055.81	4790.77	NA	NA	8825.47	NA	NA
10_GL0009545;20_GL0027333;4-2_GL0105421;47_GL0039979;5-7_GL0020114;5-7_GL0076266;5-7_GL0138075;6-8_GL0073135;6-8_GL0085366;7-4_GL0099193;G1-5A_GL0036391;MH-6-5_GL0063812;S-Fe10_GL0161803;S-Fe1_GL0098999	314831	291037	298269	532333	531677	534746	565190	548637	545927	538980	NA	508759	NA	526556	486165			O70133	914.528	1057.3	1183.96	1182.06	963.85	NA	937.958	NA	NA	NA	NA	NA	NA	NA	NA
10_GL0009545;20_GL0089028;5-7_GL0020114;5-7_GL0076266;5-7_GL0138075;54_GL0144097;6-8_GL0073135;6-8_GL0085366;MH-0-5_GL0037489;MH-6-4_GL0107289;S-Fe2_GL0149110;S-Fe3_GL0215405	NA	NA	4472.8	NA	61148.4	70403.4	112584	115018	111832	111458	91053.5	92853.6	105268	111514	100512			O70325	3320.88	2868.35	3597.94	2195.91	3061.99	2532.71	3054.46	NA	NA	NA	NA	NA	NA	NA	NA
10_GL0009545;26_GL0111020;MH-6-5_GL0063812	3943.36	3292.09	3495.29	3244.4	2816.4	3291.17	2240.87	2267.22	1865.84	2064.6	1665.55	1506.83	855.189	767.926	1202.98			O70370	27593.4	29605.9	26427.1	35008.4	35863.6	31012.5	31648.3	34343.1	35442.9	26613.3	28836.8	24004.6	19415.8	22957.5	28638.2
10_GL0009545;2A-dyr16-07_GL0047024;G1-5A_GL0036391	8231.85	8369.5	8647.04	10077.1	11023.9	9342.89	10680	11649.1	10525.7	12012.9	11732.4	11685.8	NA	NA	NA			O70435	7815.63	7904.87	8162.95	7460.23	8197.12	7926.97	8499.26	8029.03	NA	9373.08	9535	NA	NA	NA	6245.56
10_GL0009545;5-7_GL0020114;5-7_GL0076266;6-8_GL0073135;6-8_GL0085366;G1-5A_GL0036391	154635	159972	150008	173626	173159	165260	173433	161021	147816	156317	163470	144631	222060	161401	145020			O70456	8202.79	8160.31	6987.55	8887.43	8848.83	8755.13	10250.8	9237.21	11406.9	13110.6	11481.6	NA	NA	NA	12742.5
10_GL0011642	13572.6	16030.4	12394.9	13855.3	14846.4	14822.1	14399.5	14514.4	14275.9	11787.6	8454.45	9765.04	10033.8	10151.7	11658.4			O70456;P61982;P62259;P63101;P68254;P68510;Q9CQV8	7615.04	7597.41	7329.46	15094.4	16454.2	16017.4	19138.6	18648.1	16519.4	14709.9	16157.6	13422.3	13273.3	18654.5	18480.9
10_GL0011642;2-1_GL0025638	5606.46	4705.03	5506.74	4357.64	4963.71	3845.12	4914.24	3683.4	4344.78	1270.73	NA	2593.71	2514.41	NA	NA			O70456;P61982;P63101;P68510	NA	10838.7	10509.3	NA	NA	NA	NA	NA	NA	NA	NA	NA	NA	NA	NA
10_GL0011642;2-1_GL0025638;2-1_GL0032121;2-1_GL0118084	4369.3	3069.75	3586.39	NA	NA	NA	NA	NA	NA	NA	NA	NA	NA	NA	NA			O70475	14559.3	14116.8	13411.1	13823.1	13091.6	13971.7	13430.4	14218.6	12514	12282.8	11074.9	11720.5	9267.21	11471.1	12212.3
10_GL0011642;2-1_GL0025638;2-1_GL0032121;2-1_GL0118084;2-3_GL0037968;2-5_GL0004989;5-8_GL0142127	17379.5	16142.8	16560	14359.9	15771.4	15944.4	15571.1	16508.9	14989.9	14519.9	15499.7	15202.8	12861.8	14502.3	13175.3			O70503	3691.84	5001.24	5666.06	5710.12	5272.19	5943.72	7861.9	6247.13	6480.85	7391.76	6873.57	6932.88	4855.54	13430.2	NA
10_GL0011642;2-1_GL0025638;2-1_GL0118084	NA	NA	NA	3558.68	3255.17	3418.93	4501.48	3506.69	3688.12	NA	NA	NA	NA	NA	NA			O70570	589187	591712	566036	553269	524502	499316	584265	574718	549375	440060	442186	422735	444091	470999	423730
10_GL0011642;2-1_GL0032121;2-1_GL0118084;2-5_GL0004989;5-8_GL0142127	5159.5	5805.34	5575.64	3328.11	3643.51	2771.28	4479.7	4652.4	3634.05	NA	NA	NA	NA	NA	NA			O88310	933957	625056	1.0522e+06	1.17701e+06	1.18059e+06	1.18016e+06	1.24891e+06	1.27666e+06	1.27912e+06	1.03352e+06	1.08503e+06	930744	1.10869e+06	1.04297e+06	913249
10_GL0015619	1573.96	2291.21	1983.61	2110.71	2085.5	2358.48	2179.71	2294.43	1815.53	NA	2768.63	NA	NA	NA	NA			O88312	43447.7	43467.1	43595.3	49110.9	47447.1	46300.1	44967.2	48541.3	47702.5	31114.5	36374.5	49468.6	43025.2	44828.5	56054.2
10_GL0015619;5-8_GL0134414	54173.2	46680.4	42548	59167.7	58267.6	55922.9	69443.4	59103.9	60272.5	70606.6	71308.7	71656.7	65109.2	70423.5	69226.1			O88329	18454.7	19855.7	17998.7	22281.3	21595.2	22324.2	22093.8	23140.3	21930	20241.9	20096.7	19080.1	20210.7	19920.6	19918.3
10_GL0015619;Group2-1A_GL0079313;Group2-4A_GL0181870	2768	3124.81	2767.13	NA	NA	NA	NA	NA	NA	NA	NA	NA	NA	NA	NA			O88342	13143.3	12479.9	12497.5	12704.5	12411.6	12428.7	14111.6	13618.6	14188.3	14784.8	14601.9	14331.3	14386.6	14776.3	14851.9
10_GL0018496	783.726	746.345	769.628	857.871	801.087	630.802	610.535	818.271	NA	NA	NA	NA	NA	NA	NA			O88343	3138.5	2810.62	2897.38	NA	NA	NA	NA	NA	NA	NA	NA	NA	NA	NA	NA
10_GL0022779	2799.74	3629.51	2810.12	4222.3	6119.13	5334.18	3735.11	3204.4	2968.24	NA	3945.48	NA	NA	NA	NA			O88346	3051.09	2882.41	2684.47	NA	NA	NA	NA	NA	2316.79	NA	NA	NA	NA	NA	NA
10_GL0022788	54697.2	54468.5	54275	70652.8	74491.5	73893.2	67651	66653.2	69110.5	67448.6	69395.5	69515.9	70279.9	66355.1	71334.4			O88428	7499.34	7873.83	8197.73	8531.28	8441.43	8852.12	9153.94	9210.19	9295.25	8970.34	9251.92	10926.6	12489.4	9732.08	12402.6
10_GL0023724	558.961	757.189	705.854	NA	551.799	501.989	NA	450.365	NA	NA	NA	NA	NA	NA	NA			O88455	4277.04	4187.7	3795.57	3762.91	3580.35	3403.43	4026.45	3872.53	3921.21	NA	3566.96	NA	NA	NA	NA
10_GL0024591;16_GL0015629;1B-dyr12-07_GL0014279;20_GL0118339;S-Fe10_GL0031283	10284.7	9331.33	10904.4	9955.85	10177.9	11341.2	9685.95	9492.58	10074.1	12454.8	12865.1	NA	9420.94	9994.84	NA			O88456	6453.02	6254.23	6584.76	7921.87	7618.89	7826.06	7367.74	6501.19	7701.09	6668.11	6238.65	7319.29	6703.8	8362.38	7208.52
10_GL0025698;2-4_GL0007561;4-2_GL0043523;54_GL0082039;8-3_GL0010235;G1-5A_GL0104085	42820.3	42581.2	40655.9	40742.5	40902.3	39315.3	40331.8	38171.4	37351.6	41203.6	41399.4	34837.4	37015.8	38089.7	31549.1			O88533	4228.25	5501.41	4348.67	6067.56	5743.26	6135.22	5290.43	6106.64	5955.93	NA	NA	3891.42	NA	NA	NA
10_GL0025698;4-2_GL0043523;5-8_GL0102626;G1-5A_GL0104085	NA	NA	NA	19922.7	16725.5	NA	NA	17621.4	16807.7	8915.37	7546.11	4729.86	5621.06	NA	7925.84			O88569	3984.83	4090.49	3943.56	4180.32	3755.15	4036.55	4598.4	NA	NA	NA	NA	NA	NA	NA	NA
10_GL0025698;54_GL0082039;8-3_GL0010235	1112.9	831.234	687.232	961.71	945.583	1249.05	NA	782.704	797.278	NA	NA	NA	NA	NA	NA			O88593	63256.6	79668.2	45792.2	66769	73903.4	46060.4	NA	69358	70076.9	NA	NA	NA	NA	NA	NA
10_GL0025698;5-8_GL0102626;54_GL0082039;8-3_GL0010235;G1-1A_GL0023674;MC-6-2_GL0178191	11703.8	9236.49	8717.4	5385.41	5536.83	3990.39	5126.58	6493.21	NA	NA	NA	NA	NA	NA	NA			O88627	5049.41	5777.6	5655.17	7162.02	6165.71	6167.42	6846.28	7117.54	6525.86	8411.25	8295.29	8580.55	7674.6	10097.4	7932.08
10_GL0025715	1168.46	NA	1267.44	NA	NA	NA	1655.41	1406	1227.44	NA	NA	NA	NA	NA	NA			O88685	868.638	628.909	776.014	1220.78	697.528	NA	NA	NA	NA	NA	NA	NA	NA	NA	NA
10_GL0025715;2-1_GL0103287;2-2_GL0080396;4-1_GL0068219;4-8_GL0081263;5-4_GL0087955;7-1_GL0085595;8-7_GL0053386;MC-6-2_GL0095422	24584.3	27794.5	22352.5	94236.9	81565.9	100308	98099.6	89050.1	101279	NA	NA	NA	NA	NA	NA			O88792	32904	31933	31306.7	34519.8	33743.7	35675.7	31630	30323	30067.3	27990.6	25047.7	22973.8	24722	23461.4	29783.1
10_GL0026251	6283.04	7382.54	7103.01	6573.95	5699.31	6021.19	6952.91	6142.04	5847.89	5947.2	5364.6	6429.56	6675.79	NA	NA			O88844	6551.2	6720.43	6077.07	7457.79	8105.8	8079.72	7842.1	8427.58	8442.1	7244.94	9457.84	8296.64	7218.37	7845.1	7966.52
10_GL0027835	NA	NA	NA	NA	NA	NA	NA	5728.99	NA	NA	NA	NA	NA	NA	NA			O88968	1590.87	1761.75	1892.67	1801.2	1942.51	NA	NA	1498.84	NA	NA	NA	NA	NA	NA	NA
10_GL0027835;1A-dyr2-07_GL0057578;28_GL0027363;G1-1A_GL0032124	NA	NA	NA	18286.9	15836.3	17745.9	24412.7	26948.5	28446.9	35643.9	31474.5	35795.9	32849.5	32005.5	31838.7			P00015	2211.18	2261.08	2480.69	1793.58	1841	1461.1	2127.2	1135.68	NA	NA	NA	NA	NA	NA	NA
10_GL0030674	25937.3	24589.8	25952.5	24528.7	24064.1	22723	27304.8	26789.6	26396.9	24813.2	23239.2	24186.6	22963.6	22112.4	23916.8			P00158	51105.3	179245	154751	6339.56	5958.21	6464.33	4607.31	6631.04	5766.77	NA	NA	NA	NA	NA	NA
10_GL0030675	16103.3	14288.3	14507.1	14646.3	16264.9	15451.2	14697.1	16821.8	16654.1	14246.3	14194.9	13508.5	11950.5	9653.53	NA			P00329	18474.6	17453.3	18663.1	19082	17916.7	19779.8	20431.5	20051.3	20368.6	20615.6	17505.6	17987.4	18904.1	20644.3	19287.5
10_GL0030677	38326.4	35242.3	36502.5	29327.3	35709.3	27678.8	32313.1	33982.4	30117.7	15968.6	11046.3	23226.3	21161.9	18992.7	12600			P00405	70681.4	50002.8	51674.1	82726	80555.6	86618.4	83677.3	76617.4	84121.9	78283.3	73468.5	70389.3	71949.4	72244	75901.3
10_GL0030713	3855.65	4448.96	4067.73	8393.43	8925.88	8731.57	8764.26	8616.78	7701.97	9001.4	10017.5	9482.11	NA	NA	9029.86			P00493	2211.83	2263.69	1763.77	2356.28	2857.29	2608.85	2422.39	2759.24	2370.4	3784.48	NA	NA	NA	NA	NA
10_GL0033884	904.166	849.057	969.018	NA	NA	NA	NA	NA	NA	NA	NA	NA	NA	NA	NA			P00683	2632.39	2208.73	1613.51	NA	3931.86	NA	NA	NA	NA	NA	NA	NA	NA	NA	NA
10_GL0038119;11_GL0059961;2-1_GL0009701;3-7_GL0072829;G1-2A_GL0012091	10488	10359.9	11468.9	7676.38	8534.81	8313.58	7990.46	7352.53	7712.01	5934.03	5235.69	5784.58	NA	NA	NA			P00687	32936.5	30060.8	32146	27218.5	26642.4	24247.1	22932.9	22656.4	20880.9	13656	10473.2	15019.4	7721.74	8358.92	12225.2
10_GL0038119;11_GL0059961;3-7_GL0072829	33689.7	30270	30865.8	27775.1	30790.8	30248.6	24542.9	28404.2	27291.4	26637.7	25126.4	28134.2	22795.1	30063.6	23806.3			P00687;P00688	292922	316789	246361	395810	448428	373429	568175	581532	543582	NA	734141	NA	691255	771392	650538
10_GL0038119;11_GL0059961;3-7_GL0072829;7-1_GL0070929	26524.1	32232	31210.9	29282.9	29354.1	29077.8	25133.3	31339.3	27249.2	31291.3	30646.8	29121.5	29044.8	31901.4	30243.9			P00688	308020	317518	296966	348204	338022	341364	337067	343462	341089	249873	235824	229309	224175	214256	224020
10_GL0039963	2244.34	NA	3573.83	9838.87	NA	NA	NA	174133	NA	NA	NA	NA	NA	22281.6	NA			P00920	45704.5	36554.2	38843.3	37433.1	37653.6	40240.1	36774.3	38295.2	39962.7	39283.8	39257.6	37955.5	35029.8	35246.9	37364.3
10_GL0039963;1A-dyr2-07_GL0057236;S-Fe2_GL0214744	9094.95	8755.24	7741.05	11015.6	10594.3	11684.8	10758	10268	11771.6	10366	10211.3	9999.24	8126.07	8884.5	10251.3			P01027	11509.9	12228	12145.3	12657.7	12109.7	12804.1	12902.9	12396.7	12411.5	12570.9	13316.8	13424.5	13782.2	12891.2	15014.7
10_GL0039976	5503.13	6161.01	6051.32	NA	5925.57	6559.31	4908.38	NA	NA	NA	NA	5093.99	NA	NA	NA			P01132	2566.26	2916.26	2516.97	2791.16	2952.76	2856.35	2282.26	2944.46	3299.81	NA	NA	NA	NA	NA	NA
10_GL0039980	NA	3000.51	2161.72	NA	NA	NA	NA	NA	NA	NA	NA	NA	NA	NA	NA			P01592	664803	627335	579761	780762	817381	776739	903796	882913	937147	945243	873629	833773	878147	903560	794590
10_GL0039980;1A-dyr2-07_GL0002766	7737.31	NA	6636.47	26901.6	23925.7	24491.4	25253.7	24406.6	26488.1	NA	25521.8	23684.6	21790.5	NA	NA			P01630	31141.3	33295.5	31388.8	27411.5	26420.1	28239.9	27447	28084	31272.5	28133.2	25693.2	25045.1	29634.5	31058.7	28151.4
10_GL0040330	NA	NA	NA	3445.56	3619.71	3819.6	2794.65	2820.24	3755.41	NA	NA	NA	NA	NA	NA			P01633	543131	523842	490203	591745	543646	623838	560011	581384	591501	518177	518603	491148	521843	489813	487109
10_GL0040330;2-4_GL0087179;3-5_GL0047540;4-1_GL0069176;41_GL0096270;5-1_GL0073759;6-6_GL0028102;6-6_GL0093594;7-1_GL0064936;7-2_GL0034129;G1-3A_GL0016658;Group2-6A_GL0107987	157741	153266	131942	NA	NA	NA	NA	NA	NA	NA	NA	NA	NA	NA	NA			P01634	26351	24164.2	23173.2	48152	46342.2	47473.7	49134.4	49934.1	49856.9	43729.3	41845.9	43890.2	40983.6	39634.9	41309.6
10_GL0040778;14_GL0046265;1A-dyr4-07_GL0104106;20_GL0086333;Group2-8A_GL0128941;S-Fe2_GL0137955;S-Fe2_GL0200208	20794.8	16820.9	18884	12473.9	12916	10424.1	11252.9	12212	11095.5	5274.38	6701.21	5358.51	4672.08	4375.92	5743.1			P01635	60123.2	56312.5	57325.3	71946	68306.2	72301.2	75584.6	81089.7	80039.8	83192	87173.4	85591.1	85361.8	82785.6	83225.3
10_GL0040778;S-Fe2_GL0200208	25091.2	23065	23740.9	29654.5	28659.8	26264.9	25410.1	26235	31423.2	25842.7	27730.3	35641.8	25798.1	21330.5	21647.8			P01636	9212.02	8807.41	7613.87	7477.18	7557.59	8824.36	8476.64	8961.73	8805.51	7259.03	3440.35	17226.3	NA	NA	5042.61
10_GL0045886	10906.7	10003.3	9566.64	9393.15	NA	NA	9506.7	NA	NA	6426.04	9438.69	NA	NA	7702.05	NA			P01638	82862.3	73052.7	97660	72639.1	77244.4	79313.6	61581.6	64312.4	66227.5	71656	66416.6	66263.4	55178	79046.8	56509.5
10_GL0048655;20_GL0131076	9775.05	6364.27	5757.3	9969.88	8336.89	5795.67	7899.6	7120.31	8733.95	4098.88	3356.55	2295.52	5131.32	4483.07	NA			P01639	13920.6	14305.4	13989.8	12255.7	8540.28	8845.95	10487.4	10187	8730.25	9443.85	11545.8	NA	NA	NA	NA
10_GL0048655;2-1_GL0042309;2-2_GL0131240;2-3_GL0051869;43_GL0068607;7-8_GL0086080;8-1_GL0083732	168023	46952.7	174283	134115	130655	95264	104645	115914	114434	88994.2	105491	122839	120800	102522	121817			P01642	85705.6	87261.8	80996.1	156403	154562	165859	157104	150576	160762	132866	145169	141397	128539	141618	129944
10_GL0051222	2569.57	2402.22	3218.45	2069	NA	NA	NA	NA	2414.37	NA	NA	NA	NA	NA	NA			P01644;P01645	39640	36757.9	35080.5	22491.7	21869.3	21329.5	18042	22570.7	19691.1	NA	3562.62	NA	NA	NA	NA
10_GL0051222;20_GL0090764;26_GL0073947;4-2_GL0122448;7-5_GL0020145	11479.7	10562.4	10336	13604.7	14000.6	12757.5	14547.4	14365.6	14189.3	NA	14299.6	NA	NA	NA	NA			P01647	51598	71468.7	NA	62572.3	58081	58257.9	74780.1	83958.6	80718.4	NA	NA	NA	NA	NA	NA
10_GL0051222;2-1_GL0012776;2-1_GL0046786;2-3_GL0075850;20_GL0090764;26_GL0073947;3-1_GL0035705;4-2_GL0122448;7-5_GL0020145;G1-5A_GL0039703	54283.8	52971.1	54268.2	45266.5	45758.7	49630.2	49785.7	50681.2	51219.1	50688.2	NA	55545.8	NA	51893	48146.8			P01660	16988.3	21206.6	19086.9	33557	34898.5	33720.8	30290.4	30162.7	32321	30897.1	31419.2	25933.8	33101.3	29459.1	NA
10_GL0051222;2-1_GL0046786;G1-5A_GL0039703	4581.79	4077.25	2577.62	NA	NA	NA	NA	NA	NA	NA	NA	NA	NA	NA	NA			P01671;P01673	4609.36	5275.28	4736.18	4804.58	4756.48	5543.4	6827.94	6986.62	8942.41	10288.3	NA	NA	NA	NA	NA
10_GL0054899	4598.26	4331.65	4312.26	NA	NA	NA	NA	NA	NA	NA	NA	NA	NA	NA	NA			P01674	13137.1	12417.8	14041.7	14038.7	12700	14051.3	13666.2	14489.4	13472	10988.7	10684.6	11471.5	8608.06	8122.25	10637.2
10_GL0055487;23_GL0131578;MC-6-3_GL0035939	1366.27	1383.06	1282.97	NA	NA	NA	NA	NA	NA	NA	NA	NA	NA	NA	NA			P01680	87487.4	82222.9	83397.7	128398	126093	122959	122643	121814	125296	123837	126286	117477	133362	118457	118273
10_GL0057338	10018.9	13377.8	12557.1	13249.4	14277.8	12268.6	14142.4	14167.5	14592.9	NA	11908.6	14542.2	NA	15833.2	11505.4			P01746;P01747	34020.8	35320.2	32677.3	28485.1	30179	24594	27310	27891.3	28258.7	10729.1	12605.8	10439.2	10887	10814.9	9661.46
10_GL0057711	11171.3	10640.3	10666.3	9851.99	NA	NA	NA	NA	9080.18	NA	NA	NA	NA	NA	NA			P01749	NA	NA	NA	7965.32	NA	8853.32	6348.73	6410.94	8061.13	6933.24	8714.19	NA	NA	NA	NA
10_GL0059712	7493.93	7036.88	7277.05	10734.8	11112.7	11458	9878.78	9953.53	11345.3	13721.8	9707.1	11470.4	10808	8982.31	9538.14			P01750	5753.78	6257.76	10876	8471.95	6927.58	9646.11	10739.2	8630.04	7255.34	8779.04	9193.53	9912.18	9279.93	8378.94	7155.13
10_GL0059878;10_GL0070463;14_GL0065856;23_GL0134681;38_GL0053435;4-1_GL0018258;40_GL0061738;G1-1A_GL0013042;G1-1A_GL0071501;MC-0-1_GL0009093;MC-6-4_GL0043020;MC-6-4_GL0072895;S-Fe10_GL0019286;S-Fe10_GL0157485;S-Fe1_GL0132958;S-Fe3_GL0042534	11042.5	12895.4	12394	9300.86	8293.45	9616.11	NA	NA	NA	NA	NA	NA	NA	NA	NA			P01750;P06330	14350.8	NA	NA	12400	15809.7	12336.4	16207	15249.1	16551.6	NA	NA	NA	NA	NA	NA
10_GL0059878;10_GL0070463;38_GL0053435;S-Fe10_GL0157485;S-Fe1_GL0132958;S-Fe3_GL0042534	11174.3	10589.2	11956.5	NA	NA	NA	NA	NA	NA	NA	NA	NA	NA	NA	NA			P01754;P06328	17851.5	17328.1	15728.4	NA	71317.5	67493.2	NA	NA	NA	NA	NA	NA	NA	NA	NA
10_GL0059878;G1-1A_GL0071501;S-Fe10_GL0157485;S-Fe3_GL0042534	4603.23	4759.75	4170.58	5291.57	5014.77	4734.71	6345.74	6036.32	5374.44	3683.72	2984.31	3741.23	2814.69	5210.12	3935.6			P01786	1952.35	1705.87	1615.09	NA	NA	NA	NA	571.234	NA	NA	NA	NA	NA	NA	NA
10_GL0059878;MC-0-1_GL0009093;S-Fe3_GL0042534	13786.6	12847.9	12386.8	NA	NA	NA	NA	NA	NA	NA	NA	NA	NA	NA	NA			P01787;P01788;P01790;P01791;P01794	9312.39	9865.03	9627.95	10192.6	10295.5	10616.6	8970.26	9362.47	8963.52	7877.11	7024.45	8212.58	6426.03	6630.55	7125.02
10_GL0059878;S-Fe10_GL0019286;S-Fe3_GL0042534	863.14	1501.39	856.405	602.155	871.146	528.258	NA	NA	NA	NA	NA	NA	NA	NA	NA			P01796;P01797;P01798;P01799;P01800;P01801;P01802	30063	31153.2	30470.2	22213.8	21441.4	24260.9	22079.5	19794.7	21376.2	19679.3	15619.7	20339.6	18182.5	15144.7	17077.8
10_GL0060041	12017.6	12755.8	13303.6	15293.9	14930.2	15742.6	15461.6	12542.4	15139.9	13428.2	13064.1	14784.3	15542.9	8557.02	10893			P01804	10229.2	9407.41	10139.1	8325.94	8282.82	7368.7	8347.72	7537.55	7391.35	7994.89	6487.49	5800.26	5985.35	5129.19	6644.78
10_GL0062623	NA	NA	NA	NA	NA	NA	NA	NA	NA	NA	NA	1009.82	NA	NA	NA			P01806;P01807;P01808;P01809;P01810;P01812	8119.73	5925.87	7275.41	NA	NA	NA	NA	NA	NA	NA	NA	NA	NA	NA	NA
10_GL0062623;MH-6-5_GL0072282	NA	2036.65	1221.68	NA	NA	NA	NA	NA	NA	NA	NA	NA	NA	NA	NA			P01806;P01807;P01808;P01809;P01810;P01812;P18524	29656.9	29405	28491.7	34374.6	33525.2	32675.6	33286.3	33872.7	32764.5	31413.7	27639.2	27503.7	23164.3	24129	26541.3
10_GL0063584;MC-0-1_GL0015266	3493.49	5957.67	3810.22	3126.88	5149.41	3550.12	2907.4	3419.14	3829.8	3514.44	NA	NA	NA	NA	NA			P01806;P01807;P01808;P01809;P01812	NA	NA	6181.25	12678.9	14301.6	12588.3	19715.4	19683.5	18923.9	15744.4	17065.7	14938.4	13164.8	13268.4	NA
10_GL0063930	39838.4	37626.6	37017.4	41498.3	40170.4	41141.9	36661.3	38351.2	36147.1	35792.6	41032.4	34416	37206.1	34518.8	34124.7			P01819;P01820	50087.3	48657.2	49664.6	NA	NA	NA	NA	NA	41439.6	NA	NA	NA	NA	NA	NA
10_GL0065599	6319.18	6560.03	6313.54	7265.72	7030.14	5811.21	7199.02	5642.76	6901.14	8920.64	8264.53	9380.84	9724.55	7512.27	8244.97			P01837	361767	594392	380405	381998	287251	344847	407424	400557	404798	225909	189434	143389	178239	144108	197923
10_GL0065600	2951.69	3327.07	3186.58	3946.33	3221.44	3725.51	2778.39	3503.69	3204.23	4263.85	NA	NA	4303.24	7049.7	NA			P01843	59312.5	63640.6	62567.2	50599	52928.3	56018.2	48884.3	50530	44463.8	41092.7	42435.9	42070.6	36281.1	37543.6	46739.1
10_GL0066865	13115.6	13544.2	13582	10363	14674.4	14424.1	11520.5	11819	11558.4	13372.3	8785.47	10127.5	8891.78	7548.91	12691.5			P01844;P01845	1233.46	1484.12	1307.17	NA	1130.62	1307.93	1349.65	1296.99	NA	1249.69	NA	1228.08	NA	NA	NA
10_GL0069978;2A-dyr16-06_GL0039105;2B-dyr19-06_GL0030623;7-2_GL0017231;Group2-1A_GL0049538;Group2-2A_GL0001900;MC-6-2_GL0155276;S-Fe9_GL0216616	180303	174719	174171	176365	161936	165667	169610	165310	180457	209144	186699	208551	215058	226653	195698			P01867	7708.04	9934.75	9148.88	9952	10307.3	10568.8	10530.9	8848.31	9371.05	9359.59	8385.31	6589.04	8072.71	NA	7210.69
10_GL0069978;7-2_GL0017231	6842.2	7643.13	8510.19	12719.5	12754.5	11481.9	11471	13070.2	12924.3	8312.29	9107.5	7461.88	NA	9721.71	NA			P01868;P01869	NA	3496.32	NA	NA	NA	NA	NA	NA	NA	NA	NA	NA	NA	NA	NA
10_GL0070277;4-1_GL0033815	4988.4	6216.8	5225.07	6110.71	5100.49	5551.38	5163.69	6250.97	4580.04	4049.89	3863.36	5141.26	3005.93	5427.71	5132.94			P01878	663379	538942	544562	727441	741961	693499	781795	758013	915891	586650	568294	491754	620210	547928	578973
10_GL0070463;38_GL0053435;G1-1A_GL0013042;S-Fe1_GL0132958	NA	NA	NA	12603.6	15257.2	14991.3	11370.9	11335.3	14186	14338	9332.36	12575.5	8403.27	NA	NA			P01887	15090.4	15550.3	15009.9	17201.1	18032.3	17980.3	16032	17861.1	16988.2	15595	15942.8	14413.7	15135.1	15536.2	15101.7
10_GL0070463;38_GL0053435;G1-1A_GL0071501;S-Fe10_GL0157485;S-Fe1_GL0132958	2615.1	2805.39	2953.02	2811.36	2715.57	1786.63	2275.39	2561.19	2844.45	NA	1948.57	NA	NA	NA	NA			P01899	7509.37	8331.78	7465.74	9464.29	8586.61	8465.51	8334.37	8252.86	7803.09	7031.06	6747.79	6685.85	8633.16	6343.97	NA
10_GL0070463;38_GL0053435;MC-0-1_GL0009093;S-Fe1_GL0132958	4199.22	3455.24	5301.57	5586.21	6729.48	6114.38	5925.1	5921.35	5319.54	4819.12	4821.8	3420.43	5004.03	4551.49	3864.91			P01899;P01901	1523.63	5092.79	4145.36	5738.78	4922.93	5333.34	4832.3	5344.75	5492.3	6166.53	4354.8	6463.77	NA	3412.57	4973.07
10_GL0071530	6587.5	6655.26	5540.34	7126.99	6780.93	6048.82	7264.02	6449.04	6810.84	7168.47	9338.7	6944.32	7738.17	7350.84	6178.18			P01901	5338.39	5230.67	4937.15	6320.91	5419.5	5216.22	5856.44	5186.32	5587.24	NA	3740.89	NA	3347.47	NA	4957.33
10_GL0075367	9999.93	8335.73	8544.12	12687.6	14407.3	13867.4	27750.9	29511.2	31312.8	19750.2	19220.4	NA	NA	NA	14001.1			P01942	7755.81	8670.5	7639.92	29834.2	28785.1	27856.4	56025.5	57289.6	61833.2	64535	62351.9	61413.5	68607.1	64298.7	59612.6
10_GL0075367;1A-dyr4-07_GL0048670	12716.6	13496.8	12962.6	13924.7	14296.9	13098.5	15599	14542.8	12956.9	12805.4	11449.1	11170.2	14747.4	11170.8	11669.6			P02088	63850	54076.8	46457.7	61352.8	56618.7	59222.9	60202.7	63264.1	54834.8	39939.9	32332.3	32922.3	34450	36159.9	36666.1
10_GL0077463;2-2_GL0047467;23_GL0145025;7-5_GL0024707;MC-6-5_GL0049850	709.869	678.063	NA	2020.84	1583.59	2286.04	2425.16	2630.5	1773.81	2326.01	1190.23	NA	NA	NA	NA			P02301;P68433;P84228;P84244	9274.39	7089.83	6996.13	70072.1	122515	65116.3	270024	269938	285823	332475	327353	343373	368500	351317	330792
10_GL0085180	3636.48	3370.54	3000.59	4622	4720.45	4623.37	4428.33	3720.37	4365.96	NA	NA	NA	NA	NA	NA			P02535	142485	141421	142594	121594	119852	119745	119045	117813	114212	104249	109261	110077	108028	91272.5	101233
10_GL0086254	2846.82	3052.39	2558.54	3586.19	3579.38	3220.39	2827.14	3172	3374.27	2483.76	2381.86	NA	NA	NA	NA			P02535;P08730	9408.42	8665.07	8130.68	9366.99	8991.42	7806.3	13408.8	12056.7	13837.1	6854.39	7132.65	7730.29	NA	9363.23	6355.82
10_GL0087224	11005.5	11641.8	11403.3	13418.5	13026	13556.7	14330	13266.4	14812.3	15899.3	13644.5	18255	16436.8	17215.9	19173.3			P02535;Q9Z2K1	188473	175894	176864	200693	197015	196257	179087	NA	178214	162282	168493	164284	175877	188445	156142
10_GL0091753	NA	NA	709.891	NA	NA	NA	NA	NA	NA	NA	NA	NA	NA	NA	NA			P02816	411904	452905	440468	551079	539061	510174	551440	560586	581985	450813	415890	406657	414534	434907	418464
10_GL0092158;2-5_GL0008306;Group2-1A_GL0045529	2678.22	2712.82	2307.98	2066.82	2250.02	2040.94	1754.02	2004.16	1861.3	1090.22	1322.98	2156.54	1167.82	2069.03	NA			P03921	411.983	571.365	195.954	NA	NA	NA	NA	NA	NA	NA	NA	NA	NA	NA	NA
10_GL0093032	1368.57	2152.58	2052.7	1169.73	1395.92	1326.7	1425.2	1585.32	1714.97	NA	1536.88	NA	NA	NA	NA			P03953	3064.25	3444.01	4365.82	NA	NA	NA	NA	NA	NA	NA	NA	NA	NA	NA	NA
10_GL0095502	8524.61	8513.71	8591.54	9605.69	10138.8	9551.24	9633.87	8965.88	10276.8	11277.5	9133.89	9624.13	9188.19	13594.4	7696.41			P03958	9503.99	9958.5	10033.3	10518.1	10137.8	9857.27	10767	11620.4	10170.8	9632.42	11441.3	8929.95	7667.86	9386.45	7440.95
10_GL0097774	1658.05	1709.75	1994.75	1584.64	1248.76	1694.51	2226.79	NA	2280.4	NA	NA	NA	NA	NA	NA			P03976	16055	14942.1	15473.4	12168	11877.1	12579.6	12380.4	12113.3	12487.2	NA	NA	12015.8	10646.9	8794.15	11948.6
10_GL0097774;1A-dyr2-07_GL0053074;2B-dyr19-06_GL0042982	6269.16	7255.67	6560.69	6079.79	5587.77	5338.93	5496.01	4881.03	4949.64	NA	3365.67	NA	NA	NA	NA			P03977	3823.52	2662.07	4015.32	5151.1	4288.97	4618.76	6685.02	8537.37	6209.36	4182.04	NA	4665.39	NA	5049.05	NA
10_GL0097774;1A-dyr2-07_GL0053074;2B-dyr19-06_GL0042982;S-Fe10_GL0098581	10880.3	11557.1	10597.3	NA	NA	NA	NA	NA	NA	NA	NA	NA	NA	NA	NA			P04104	30514.8	28197	28569.5	36869.5	35273.8	36821	33399.8	35930.9	34384	35410.5	41583	46749.5	40189.1	44243.5	NA
10_GL0098958	19259.2	19284.3	18178.6	18821.1	21374.8	20310.5	18106.1	20652.7	17200.3	17399.9	18395.7	16234	17403.1	18497.4	17186.7			P04104;P07744;P11679;P50446;Q3TTY5;Q3UV17;Q6IME9;Q6NXH9;Q922U2;Q99M73;Q9DCV7;Q9Z331	10620.7	9902.93	9426.22	51497	51335.8	51538.1	NA	56512.3	55997.9	NA	NA	NA	NA	NA	62880.8
10_GL0100485;S-Fe11_GL0031229	6193.86	6564.3	4805.13	7573.35	7431.87	6072.55	7668.28	8706.22	8638.4	7155.51	7512.34	7294.46	7370.78	6408.21	NA			P04104;P11679;P50446;Q3TTY5;Q922U2;Q9Z331	NA	NA	NA	18538.8	15572.5	20639.7	18178	16364.6	14469.1	9922.89	7985.61	10139.8	9564.55	NA	6510.18
1-1_GL0001033	10220	9452.72	10095.5	10761.3	NA	NA	NA	NA	NA	NA	NA	NA	NA	NA	NA			P04104;Q6NXH9	89779.3	102476	97318	112292	111281	110990	105952	103668	95092.7	123175	108338	111841	NA	NA	NA
1-1_GL0001033;1-1_GL0114862	5657.16	6186.18	5882.04	7808.13	7538.24	7533.17	5860.79	8383.36	7412.85	7752.37	7192.68	5242.3	NA	NA	9154.1			P04444	3961.62	NA	3742.84	NA	NA	NA	NA	NA	2903.15	NA	NA	NA	NA	NA	NA
1-1_GL0001033;1-1_GL0114862;S-Fe2_GL0048785	33877.5	33441.5	35380.5	33524.9	34235.5	29731	32708.7	31245.5	39141.3	NA	NA	NA	NA	NA	NA			P04939	14201.4	NA	12775.3	70894.5	NA	72070.2	67069.1	72040	73361.8	NA	NA	NA	NA	NA	NA
11_GL0001401;11_GL0101716	5074.53	5129.02	4303.85	3880.93	3529.2	2845.79	3552.29	3424.59	3261.21	1564.1	1107.26	NA	NA	NA	NA			P04939;P11590	29099.3	30350.7	27985.9	24615.8	27255.6	24809.5	26520.4	26994.6	24631	12798.8	12635.5	11515.8	9136.32	9108.8	6631.94
11_GL0001401;11_GL0101716;1A-dyr4-07_GL0084261;20_GL0023401;23_GL0066357;4-7_GL0047847	5827.24	4754.97	4658.32	43893	43964.4	45493.4	63432.4	63293.2	74474.6	65512.6	69650.3	68397.1	69074.6	72195.4	64723.9			P04939;P11590;Q5FW60	NA	NA	7387.56	NA	NA	NA	NA	NA	NA	NA	NA	NA	NA	NA	NA
11_GL0001401;11_GL0101716;1A-dyr4-07_GL0084261;20_GL0023401;4-7_GL0047847	37716.9	36849.3	36928.7	62765.3	55321.9	54792.1	44380	43176.8	44943.8	49708.8	47301.3	43546.2	44478.5	39541.3	38553.2			P04939;Q5FW60	968.899	935.009	717.615	NA	NA	NA	NA	NA	NA	NA	NA	NA	NA	NA	NA
11_GL0001401;11_GL0101716;4-7_GL0047847	14852.8	11396	13506.4	24758.8	26167.5	26465.5	27060.3	28255	31006.7	32171	32462.7	32612.5	31543.8	33355.4	30212.2			P04945	12593.4	10073.4	10647.3	10768.9	10623.5	10210.6	9295.28	11673.9	11987.1	6574.64	10007.7	5174.61	9574.78	6187.29	3899.59
11_GL0001401;4-7_GL0047847	1577.79	NA	NA	1056.29	NA	NA	1779.13	1646.54	NA	NA	NA	NA	NA	NA	NA			P05064	16056.5	15345.9	14441.5	17124.3	16069	15904.3	16833.6	16937.8	17424.4	13590.1	15658.9	14563	13753.8	10950.2	12099.7
1-1_GL0001529	8295.4	7798.16	8823.08	8672.41	7396.12	6896.52	NA	7758.52	7668.97	NA	NA	NA	NA	NA	NA			P05201	6612.18	6713.44	6953.88	7512.14	8256.83	8316.88	7809.45	8096.86	7727.97	7809.43	6328.19	7915.46	7957.11	6553.92	8896.19
1-1_GL0001529;10_GL0025715;1A-dyr2-07_GL0013682;2-1_GL0020071;4-1_GL0068219;4-8_GL0081263;5-4_GL0087955;7-1_GL0085595;8-7_GL0053386;MC-6-2_GL0095422	105778	104016	88490.4	145393	153634	147457	137443	134631	139729	129556	135077	137792	130235	142892	119117			P05202	14035.4	15994.9	15031.7	22512.3	23454.4	22413.7	23084.4	22663.1	23143.8	23580.4	24844.6	21084.6	19387.3	24161.3	23610.1
1-1_GL0001529;10_GL0025715;2-1_GL0020071	44152.3	44572.2	41846.9	55942.4	55161.1	59177.1	64999.8	53472.6	65671.9	82742.3	83666.8	76102.5	63963.3	87362.3	65334.7			P05208	908314	775591	809126	850262	808772	730865	833010	748784	926338	523965	489171	412987	517912	510765	460709
1-1_GL0001529;10_GL0025715;2-1_GL0020071;2-1_GL0103287;2-2_GL0080396;4-1_GL0068219;4-8_GL0081263;5-4_GL0087955;7-1_GL0085595;8-7_GL0053386;MC-0-3_GL0011656;MC-6-2_GL0095422	70704.1	63669	52656.9	84616.5	82166.1	70654.8	129475	124284	123737	98836.1	98959.8	94504.9	163358	167367	99120			P05784	16543.8	18587.4	16362.3	15858.9	16166.9	17092.4	16749.2	18251.6	16811.7	15489.6	16075.2	14974.6	13513.6	13286.5	16744.3
1-1_GL0001529;10_GL0025715;2-1_GL0020071;2-1_GL0103287;2-2_GL0080396;8-7_GL0053386;MC-0-3_GL0011656	33756.2	34998.4	31383	31772.3	34090.9	33933.5	36749.6	29076.8	34120.5	37888.2	37531.7	39540.3	34294.3	34151.6	35238.3			P05784;P19001	43611.7	53487.7	36644.1	67270.6	63277.8	58339.3	94354.7	94780.3	105985	69980.7	70869	67312.9	68706.8	73103.3	68667.4
1-1_GL0001529;10_GL0025715;2-1_GL0020071;4-1_GL0068219;4-8_GL0081263;5-4_GL0087955;7-1_GL0085595;MC-6-2_GL0095422	1855.64	NA	2057.84	11927.2	9398.75	11724.5	30571.6	34578.1	39645.4	53224.5	50380.3	54020.8	54656	51453.9	58942.5			P06151	114734	120869	118005	114281	123119	114570	117100	117687	115775	103163	110961	100254	114652	101854	104775
1-1_GL0001529;10_GL0025715;2-1_GL0103287;2-2_GL0080396;4-1_GL0068219;4-8_GL0081263;5-4_GL0087955;7-1_GL0085595;8-7_GL0053386;MC-0-3_GL0011656;MC-6-2_GL0095422	NA	NA	NA	NA	NA	NA	30715.5	NA	NA	NA	NA	20811.2	NA	NA	27762.3			P06327	1978.61	2023.79	2185.22	1224.36	1250.07	1078.86	NA	1020.7	1331.28	NA	NA	NA	NA	NA	NA
1-1_GL0001529;2-1_GL0020071	31843.4	29946.3	27062.9	33980.6	31958.1	35886.5	32391.9	34238.4	31515	29553.6	29355.3	27551.3	29769	31051.2	30419.8			P06330	472982	538810	533143	378567	428615	395707	390918	371104	378280	259875	258395	236394	206484	228911	254249
1-1_GL0002023;8-2_GL0080684	4984.79	5106.26	5783.7	10636	10061.6	8557.81	12748.4	10620.5	11500.1	8766.76	9335.44	10539.3	8313.81	12275.9	9860.71			P06745	10343.8	10984.3	12755.9	11843.9	9846.74	10793.3	11090.5	11364.3	10705	10980.6	9713.21	12568.4	8547.93	9638.12	10190.6
1-1_GL0002265	2872.78	3254.79	3468.02	3249.69	2364.75	NA	NA	1721.17	NA	NA	NA	NA	NA	NA	NA			P06797	1151.26	1287.44	1306.43	1107.87	945.713	1338.76	1256.95	1628.14	1078.72	1334.45	NA	1179.95	NA	NA	NA
1-1_GL0002265;1-7_GL0092975	12617	12141	12638.8	12359.1	12181.1	12142.7	12438.9	11552.8	11792.4	12467.1	10211.4	9689.2	9933.74	10891.2	9177.47			P07146	978093	1.8959e+06	2.16295e+06	2.75401e+06	2.57412e+06	2.53448e+06	2.84142e+06	3.18609e+06	2.72035e+06	4.0183e+06	4.27716e+06	3.76046e+06	2.85037e+06	4.12485e+06	4.17902e+06
1-1_GL0003043;1A-dyr4-07_GL0055880;Group2-7A_GL0109897;MC-6-4_GL0000211	4915.11	5459.7	6222.56	5299.17	6623.41	7527.85	5024.68	6390.06	4169.63	NA	NA	NA	NA	NA	NA			P07309	53060.9	51873.9	26848	126462	127902	121891	117546	119619	114815	116961	115338	120131	120143	125875	116791
1-1_GL0003043;1A-dyr4-07_GL0055880;MH-6-1_GL0054828	1797.73	1981.72	3118.96	NA	1517.86	1183.2	1274.69	NA	1325.99	NA	NA	NA	NA	NA	NA			P07356	114411	116911	107011	110584	105982	106997	105865	109279	107135	94509.8	91141.1	93469	94503.3	90283.7	93024.8
1-1_GL0003043;Group2-7A_GL0109897	7779	9806.23	8605.53	7523.79	8463.33	7805.33	7128.34	8137.89	6830.49	6641.26	9376.34	5374.92	7027.81	6348.4	6603.18			P07724	80206.3	79306.9	75044.4	74445.8	73152.7	75167.2	72127.3	71422.9	72566.2	66945.6	68899.2	65543.9	63751.6	64580.5	62420.4
1-1_GL0003043;Group2-7A_GL0109897;MC-6-4_GL0000211	3878.72	2823.61	3001.31	9925.12	8899.63	9360.46	10549.1	10102.7	9582.06	8303.18	9445.38	10029.5	9810.76	9548.44	7380.14			P07743	31219	31120.7	29996.2	24411.3	30448.8	34213.3	29420.3	28366.7	31989.6	30527.3	31338.5	29158.1	27940.4	20852.6	34454.8
1-1_GL0003043;MC-6-4_GL0000211	1136.02	1056.97	1215.37	590.638	NA	NA	NA	NA	NA	NA	NA	NA	NA	NA	NA			P07744	842.906	1250.64	1151	NA	NA	NA	NA	NA	NA	NA	NA	NA	NA	NA	NA
1-1_GL0003046;2-7_GL0030149;MH-6-1_GL0001405;MH-6-3_GL0025057;S-Fe20_GL0024156	56535.6	57830.8	52576.8	74963.5	74554.3	77764.4	NA	NA	NA	NA	NA	NA	NA	NA	NA			P07758;Q00896	47032.8	47780.1	50239.4	41405.3	34587.5	28068.7	34187.5	34602.8	35214.1	17118.4	18818.3	11679.2	14968.8	11866.7	16007.9
1-1_GL0003046;2-7_GL0030149;MH-6-1_GL0001405;S-Fe20_GL0024156	29396.8	27415.6	28786.2	47632.4	37731.6	43159.2	22730	21911.5	19521.4	16084	19974.8	NA	20674.1	NA	NA			P07759	63019.8	52964.7	53196.8	60228	62375.8	56804.6	66564.2	66574.5	70941.6	58720	67341.9	61676.1	56767.3	62586.6	68059.9
11_GL0003265	6997.81	7410.42	6149.79	7433.4	7871.37	7918.13	7561.45	7570.39	5513.82	7188.33	7889.71	8400.64	NA	NA	7896.8			P07759;Q03734	12467.9	10502.9	8972.4	3679.97	3382.29	NA	4559.01	4616.17	4085.78	NA	NA	NA	NA	NA	7265.35
11_GL0003265;3-3_GL0033464	24669.3	22727.2	22970.6	27376.9	24157.9	25641.9	23977.5	22849.1	27301.2	25040.3	28564	21444	23388.2	23494.1	18529.4			P07759;Q03734;Q91WP6	38060	73570.5	93705.3	66274.4	68799.1	65088.5	60532.8	55606.4	57044.4	63900.2	69045	71236.7	64346.2	68623.5	54081.6
11_GL0003545	9472.44	10009.6	10095.1	10199.2	9350.73	10517.3	9477.2	9724.01	9628.12	8618.55	7644.36	10010.6	7516.07	6542.15	9494.76			P07901	9176.86	9456.19	8586.12	11623.9	11451.8	11659.6	10209.4	11444.6	10615.3	11218	9459.68	11785.3	9278.45	14484.5	11540.5
11_GL0003656;43_GL0071674	3115.82	3547.47	3742.32	2799.24	2825.52	NA	3123.36	2231.66	NA	NA	NA	NA	NA	NA	NA			P07901;P11499	13158.7	13156.5	11896.3	13110.3	13634.6	12611	12667.5	13745.6	11298.5	14336.1	13053.7	12685.1	10599.8	11486.5	12414.9
1-1_GL0003671;1-1_GL0036481;1-1_GL0091838;1-4_GL0024956;1-4_GL0028900;14_GL0060733;17_GL0130449;5-7_GL0064926;7-5_GL0106407;MC-0-1_GL0035093;MC-6-4_GL0069182	36867.3	37687.4	38468.6	32586.1	35364.2	28652.8	27888.1	31356.3	33084.4	9382.6	8363.34	5917.53	12909.5	13249	11183			P08003	6974.76	7804.12	6712.65	8481.73	8102.81	7934.8	9048.54	8082.52	6904.1	7379.61	7612.25	7976.69	8873.36	6502.61	7174.7
1-1_GL0003671;1-1_GL0036481;1-4_GL0028900;14_GL0060733;17_GL0130449;MC-6-4_GL0069182	20698.1	20621.5	20390.2	21930.7	21039.8	21138.1	20691.9	20511.7	20963.5	17417.1	17835.2	16904.2	14797.8	11473.5	12512.6			P08113	9462.57	11268	9912.96	12290	12259.6	12911.8	14024.9	13172.1	13086.6	14243.7	14697.7	13259.9	14762.7	13508.7	14191.9
1-1_GL0003671;1-2_GL0032701;1-4_GL0024956;1-4_GL0028900;14_GL0060733;MC-0-1_GL0035093	43504.2	47822.1	43405.7	61389	60787.9	60646.6	64132.5	63472.2	63775.4	66650.9	68379.2	66593.5	62608.8	66215.5	61631.7			P08113;P11499	18254.2	16139.1	16239.3	16778.7	15835.6	16945.1	16958.5	18753.9	18014.8	17676.4	NA	NA	NA	NA	NA
1-1_GL0003671;1-4_GL0024956;1-4_GL0028900;14_GL0060733;MC-6-4_GL0069182	NA	NA	NA	12381.6	12126.9	12107.4	11946.3	14648.8	13147.3	8895.34	NA	NA	NA	NA	NA			P08228	209080	217191	229788	343464	258943	344619	219728	276780	275046	NA	272284	NA	262846	214934	NA
1-1_GL0003946	3440.28	3962.93	4104.03	3575.96	3841.52	3776.25	4422.67	3310.15	5255.51	5049.32	4116.35	NA	5341.26	NA	5627.32			P08249	53235	51581.4	50796.4	47853.4	47279.8	48452.7	47725.9	49562	48784.5	41743.8	40539.5	41803.4	37597.5	44776.9	37109.5
11_GL0004412;2-1_GL0047628;6-1_GL0053071;6-7_GL0077416;G1-8A_GL0085502;S-Fe8_GL0083926	169866	136779	137670	166157	158938	156146	160063	159398	152799	173537	164479	137634	177814	186305	136529			P08551;P08553;P19246;P20152;P31001;P46660	NA	NA	NA	NA	NA	NA	NA	8629.9	4595.2	NA	NA	NA	NA	NA	NA
1-1_GL0004559	9704.57	9460.09	10185.5	10437.9	9665.33	9729.06	10611.7	10261.8	10142.6	9002.27	8683.38	8640.13	10193.1	7217.76	8502.1			P08556;P32883	4635.44	NA	NA	NA	NA	NA	4722.5	4259.79	4236	NA	NA	NA	NA	NA	NA
11_GL0005088	1734.24	1882.58	1912.81	1613.26	1836.53	1171.48	2068.24	1552.29	1579.42	1541.27	1383.28	NA	NA	NA	NA			P08730	4314.85	4267.58	4886.34	4929.83	4819.74	5072.59	4547.79	4682.73	4663.44	2423.59	3699.63	4632.09	NA	NA	NA
1-1_GL0005528	6410.69	6640.97	6754.91	7242.16	6886.28	6918.19	5990.99	6744.55	6446.28	NA	5392.27	4493.45	NA	2802.07	NA			P08730;P19001	46110.3	44066.7	NA	87572.5	67615.9	87269.9	83559.4	NA	62230.7	NA	58404.7	45578.8	55030.2	65187.3	63646.4
11_GL0006171	3437.74	3642.9	3657.06	4310.8	4051.05	3082.18	3241.57	3111.92	2920.3	2682.56	3031.02	5088.42	NA	NA	NA			P08730;P19001;Q6IFX2;Q9D312;Q9QWL7;Q9Z2K1	19684.7	18970.9	19984.3	18308.5	22979.4	19897.4	20925.6	22416.7	19949.8	20667.9	21001.7	20173.3	20561	18247	20483.5
11_GL0006171;2-6_GL0080553;4-7_GL0137206;S-Fe7_GL0245275	2815.37	2962.13	2599	NA	NA	NA	NA	NA	NA	NA	NA	NA	NA	NA	NA			P08752	3433.99	3543.31	3108.44	3600.56	3556.33	3633.44	3720.52	2886.31	2924.65	3659.32	NA	NA	2572.13	2949.93	NA
11_GL0006171;4-7_GL0137206;S-Fe7_GL0245275	6405.96	NA	4974.97	NA	5481.16	NA	NA	NA	NA	NA	NA	NA	NA	NA	NA			P08752;Q9DC51	5378.73	10029.5	9468.98	9486.34	NA	NA	NA	NA	NA	NA	NA	NA	NA	NA	NA
11_GL0006534	5950.46	6583.71	7263.56	6310.31	6447.99	6506.67	NA	6663.3	6204.71	NA	NA	NA	3694.34	NA	4931.04			P09055	11288.3	11835.2	11914.6	11893.9	12513.3	12736.7	12468.5	12809.2	11962.7	10185.4	9297.62	9772.59	10212.9	9829.44	9267.86
11_GL0006534;11_GL0111646	1600.07	1228.29	1696.72	1533.34	NA	NA	1669.34	1798.39	NA	NA	NA	NA	NA	NA	NA			P09103	25408.2	25420	25547.6	25213	24777.4	25204.8	24363	24337.1	24297.5	21020.6	23981	21289.1	22862.9	23070.7	24535.8
11_GL0006534;11_GL0111646;2-1_GL0010886;2-1_GL0051897;2-1_GL0082032;2-1_GL0096565;2-3_GL0084512;2-5_GL0056919;4-1_GL0079156;6-4_GL0014602;7-5_GL0112828;G1-8A_GL0047995;Group2-2A_GL0060000;Group2-2A_GL0069764;Group2-3A_GL0194212;Group2-6A_GL0031198;Group2-7A_GL0049719;S-Fe20_GL0076361;S-Fe20_GL0133804	41363.9	45504	43726.2	44880.4	49134	51975.3	49697.7	49982	43424.4	30917.6	31858.3	23633	NA	29642.8	NA			P09411	8795.13	9110.28	9211.79	8873.13	9095.68	9083.74	9698.41	9091.82	9203.5	9986.51	10513.7	11743	11049.9	9119.02	12459.3
11_GL0006534;11_GL0111646;2-1_GL0010886;2-1_GL0051897;2-1_GL0096565;2-3_GL0084512;6-4_GL0014602;G1-8A_GL0047995;Group2-2A_GL0060000;Group2-3A_GL0194212	100053	100024	91096.7	114088	111350	106970	116175	111552	118225	98076.5	103397	108314	112763	90341.4	100999			P09470	63103.1	60499.3	61486.2	62040.5	58150.6	58081.2	59778	55768.7	61713.9	57595.6	54108	57907.9	58164.9	55349.4	52137.5
11_GL0006534;11_GL0111646;6-4_GL0014602;Group2-2A_GL0060000;Group2-3A_GL0194212	9276.63	6012.17	5327.1	36239	30493.9	33486.4	47224.2	48434.8	55906.3	44285.5	52873.5	49038.1	53385.9	56502.2	55110.5			P09528	35469.8	32452.6	31742.1	32517	28554.7	30675.1	28726.7	26572.9	25764.4	NA	NA	NA	NA	NA	NA
11_GL0006534;2-1_GL0010886;2-1_GL0051897	25906.4	27648.1	26668.2	21299.1	19549.2	17193.5	21243.6	22076.9	25695.3	10092.1	10368.6	10514.8	12991.6	13302.7	10526.5			P09671	24843.6	23418.8	11553	19440.3	18091.3	17894.1	25279.5	28955.2	25895.5	31390.6	32252.3	32348.3	24032.9	30786.6	35225.9
11_GL0006534;2-1_GL0010886;3B-dyr36-06_GL0058943;6-4_GL0014602;Group2-2A_GL0060000;Group2-3A_GL0194212	7778.12	7761.26	7186.14	6761.81	7216.84	7203.97	6925.12	6968.75	6434.47	NA	NA	NA	NA	5355.7	3722.86			P09803	104490	103701	111333	112738	117719	117007	119055	115151	116391	113442	124682	115330	110527	125326	123506
11_GL0006534;5-4_GL0037344	1147.65	899.612	1070.38	NA	NA	NA	NA	NA	NA	NA	NA	NA	NA	NA	NA			P0C0S6;Q3THW5	4550.81	3586.48	4454.06	5079.31	4720.04	3804.47	4722.71	4852.26	4876.07	NA	NA	NA	7413.97	NA	NA
11_GL0007621;14_GL0090060;4-7_GL0061305;6-7_GL0004908	18915.3	19157.5	17793.5	26050.5	28751.7	24714.2	25715.5	26027.2	28739.5	27206	26121.8	28077.7	23786.7	24411.4	22807			P0DP26;P0DP27;P0DP28	16710	16638.8	16470.7	11479.9	11863.8	13464	13373	11529.5	12732.2	8895.46	8521.88	7705.51	NA	7443.7	NA
11_GL0007621;4-7_GL0061305;6-7_GL0004908	8035.88	8050.27	9024.94	7075.87	6143.07	6494.13	5674.28	5903.75	4370.56	4822.41	5979.02	4694.8	4373.94	4168.93	5012.41			P10107	9417.31	8918.94	9734.06	9664.43	9766.66	9008.35	9564.26	8815.13	8772.26	9019.33	10179.6	8783.58	7812.45	9188.11	7788.5
1-1_GL0007779;1A-dyr2-07_GL0028330;S-Fe10_GL0165127	8123.49	7642.11	7764.43	7762.45	7560.5	6966.61	9422.79	7262.08	7942.61	7263.79	9527.65	9787.63	7114.11	9158.55	7867.48			P10126	78988.7	72949.1	80276.8	81824.5	83856.2	83340	86120.4	80045.9	81709.1	73442.5	74152.7	78690.5	70579.7	67255.4	71399
1-1_GL0007779;1A-dyr2-07_GL0028330;S-Fe10_GL0165127;S-Fe15_GL0033534	55759.1	50228.9	52718.5	47789.1	48278.2	40546.7	57785.9	61711.5	49141.2	56319.8	53634.6	73975.3	NA	46792.6	51973.1			P10518	3188.31	3403.23	3231.91	3057.06	3012.97	3368.44	3305.16	3318.82	3226.6	3127.16	NA	NA	NA	NA	NA
1-1_GL0008052	2826.07	2451.93	2384.7	2686.89	2795.11	3061.48	2966.15	2817.14	2761.76	NA	NA	NA	NA	2915.65	NA			P10605	19843.9	19689.7	19634.5	19736.2	21063.8	20140.6	19764.5	20263	17918.5	19202.4	19326.8	18414	15920.5	16258	14572.8
11_GL0008659	4181.14	4091.65	4093.51	5382.53	4878.54	4774.85	4805.18	4589.2	5550.37	6432.13	6015.87	NA	NA	NA	NA			P10639	46707	50428.5	38457.8	41028.3	43477.5	42382.7	45334.9	47435.7	43177.6	40735.9	37480.2	39073.4	40784.9	42594.2	42432.1
11_GL0008659;1A-dyr4-07_GL0102309	3251.14	3021.14	2947.34	4082.14	4840.57	3400.21	NA	4716.98	4121.24	NA	NA	NA	NA	NA	NA			P10649	9491.32	8852.74	9059.12	8863.54	9045.38	9093.26	8453.57	8611.61	8418.84	8071.71	8138.85	9603.06	9101.87	7917.45	8067.21
11_GL0008659;1A-dyr4-07_GL0102309;MH-0-5_GL0091689	6512.31	6123.6	7079.41	NA	NA	6208.99	NA	NA	NA	NA	NA	NA	NA	NA	NA			P10649;P15626	12125.7	12298.8	11011.1	20168.6	20046.3	19910.5	25019.3	24242.7	26033.2	22197.2	NA	23548.4	25632.6	NA	NA
1-1_GL0008776;54_GL0038006	4327.4	4471.16	5110.1	3182.61	NA	NA	NA	NA	2532.85	NA	NA	NA	NA	NA	NA			P10853;P10854;P70696;Q64475;Q64478;Q64524;Q64525;Q6ZWY9;Q8CGP0;Q8CGP1;Q8CGP2;Q9D2U9	NA	NA	NA	NA	NA	NA	NA	NA	NA	165929	180006	181789	145068	166427	172974
1-1_GL0008776;G1-8A_GL0025952	24782.1	18928.3	17058.6	NA	NA	NA	NA	NA	NA	NA	NA	NA	NA	NA	NA			P10853;P10854;Q64475;Q64478;Q64524;Q64525;Q6ZWY9;Q8CGP0;Q8CGP1;Q8CGP2;Q9D2U9	4474.82	3644.73	3496.04	2823.11	3912.36	3085.24	3259.8	4186.65	4698.06	NA	NA	NA	NA	NA	NA
1-1_GL0008837	10089.3	9689.2	9232.44	10915.2	10813.7	10690.3	11105.4	10984	11880	11437.7	10827.1	10581.4	11041.8	10018.3	11922.2			P10853;P10854;Q64475;Q64478;Q64525;Q6ZWY9;Q8CGP1;Q8CGP2	25114.8	27175.1	22873.9	40150.3	38622.2	34921	47732.2	46588.1	48814.1	NA	NA	28131.7	37249.9	37708.8	NA
1-1_GL0008925	7892.78	7984.88	7640.66	8774.73	7960.38	8345.17	8703.77	8200.72	9138.89	NA	7405.57	NA	NA	NA	NA			P11031	10211.1	10832.4	10263.1	12172.2	11635.2	11817.6	10920.9	12765.8	12644.1	12856.6	12242	11849.4	13321.6	13754.7	10790.1
11_GL0008962	2785.32	2962.69	2655.83	2511.68	2103.23	2360.19	2404.55	3169.41	2729.85	1525.67	NA	NA	NA	NA	NA			P11088	951.599	955.237	1161.93	914.909	886.008	633.497	970.076	715.561	NA	NA	NA	NA	NA	NA	NA
11_GL0008962;4-2_GL0071357;6-5_GL0102019	17035.5	15926.2	15105.7	18986.4	20009.7	19521.2	20694.2	21966.9	23025	NA	NA	26901.3	NA	22871.6	NA			P11276	4022.21	4433.05	4097.87	3866.56	3798.02	3557.01	2970.31	2744.61	3085.08	3411	NA	NA	NA	NA	NA
11_GL0009244;4-3_GL0015482;G1-5A_GL0050915;Group2-8A_GL0236582	2049.34	2099.13	2226.39	2199.51	1708.47	1715.15	1624.97	1923.85	2026.98	NA	NA	NA	NA	NA	NA			P11352	5414.27	5089.74	4908.27	5189.8	5200.12	5202.28	5182.41	5027.92	4589.26	4914.59	3527.14	5379.48	4951.94	NA	6051.89
1-1_GL0009577	17752.5	15956.5	17079.9	16964.3	17773.3	19121	19416.2	19072.6	19321.6	19672.4	20433.9	19479.4	20383.1	19545.8	22196			P11438	18803	17264.5	17431.1	20289.8	19839.8	20093.5	17096.6	15771.4	16481.4	14354.5	16180.4	13352.2	12816.3	16367	15317.6
1-1_GL0009589	1792.99	1644.41	1802.88	1790.15	1242.71	1815.3	1958.42	NA	NA	NA	NA	NA	NA	NA	NA			P11499	11485.2	11840.1	10597.8	12398.7	11686.5	13041.8	12365.6	13712.7	12342.8	15386.4	11964.9	13389.2	12278.6	11252.4	13381.9
1-1_GL0009612	15251.3	15861.6	15542.6	16136.9	16040.9	15788.3	16057.3	15157.4	14691.2	14759.2	15311	14056.4	13844.5	13885.3	14423.1			P11588;P11589	135842	109194	NA	134574	132395	NA	NA	NA	NA	NA	NA	NA	NA	NA	NA
11_GL0009802	5431.54	6248.45	5556.88	8100.34	8311.17	8714.83	8890.24	9176.87	9094.65	10145.6	9979.58	9482.79	9034.07	9830.49	8797			P11589	7022.96	8934.53	9610.85	NA	NA	NA	NA	NA	NA	NA	NA	NA	NA	NA	NA
1-1_GL0009843	12477.8	11682.1	12382.1	11919.9	11634.1	11648.8	10324.2	12194.7	11705.3	9876.85	10733.5	10920.1	8757.35	10739	12025.8			P11590	12152.8	12382.2	13419.3	12332.5	13249	12644.6	13325.7	13928.9	15858.7	NA	19298.6	NA	13723.9	16353.6	12867.7
1-1_GL0009843;1-1_GL0050864;1-2_GL0047570;11_GL0132807;2-1_GL0058178;5-8_GL0094007;S-Fe20_GL0135464;S-Fe20_GL0145970	NA	NA	NA	107109	104578	116012	106774	95712.5	109020	118412	112378	113374	130954	117044	103636			P11679	74108.1	73762.6	70981	78161	79226.8	76229.1	80229.1	78367	78359.7	72077.2	70425.3	71552.1	74945.3	72667.4	73423
1-1_GL0009843;1-1_GL0103727	10878.9	12904.4	10413.4	15080.9	14088.4	14165.4	16378.3	18804.1	17371.9	18069.5	18397.7	18072.8	NA	20767.4	NA			P11679;P50446;Q3UV17;Q99M73;Q9Z331	20958.1	21519.1	22443.4	42221.4	42410.5	38309.7	42590.7	41087.7	39519	42766.6	43704.2	48045.4	NA	53641	33588.5
1-1_GL0009843;2-1_GL0058178;2A-dyr16-06_GL0021101;3-5_GL0107671;4-3_GL0038994;6-1_GL0039873;6-3_GL0056201;6-4_GL0027646;G1-5A_GL0031161;Group2-4A_GL0005933;S-Fe2_GL0174696;S-Fe8_GL0076667;S-Fe9_GL0037037	NA	NA	NA	33364.8	30899.8	35390.7	35356.1	31262.3	33749.4	NA	NA	NA	NA	NA	NA			P11679;Q922U2	108359	115477	117556	114529	132443	134169	118859	126924	129130	NA	NA	NA	NA	NA	NA
1-1_GL0009843;2A-dyr16-06_GL0021101;4-3_GL0038994;5-4_GL0118669;6-1_GL0039873;6-3_GL0056201;6-4_GL0027646;6-6_GL0112695;8-4_GL0005749;G1-5A_GL0031161;Group2-4A_GL0005933;S-Fe8_GL0076667;S-Fe9_GL0037037	34257.1	35866.1	39575.2	42894.4	42094.8	46522	33499.1	35287.5	37684.2	26590.4	28539.9	21770.7	17604.4	25936.3	26374.1			P11983	1198.89	958.557	1055.88	895.497	1077.05	1048.92	NA	758.231	NA	NA	NA	NA	NA	NA	NA
1-1_GL0009843;2A-dyr16-06_GL0021101;4-3_GL0038994;5-4_GL0118669;6-1_GL0039873;6-3_GL0056201;6-4_GL0027646;8-4_GL0005749;G1-5A_GL0031161;Group2-4A_GL0005933;S-Fe8_GL0076667	37186.1	49025.7	47589.7	85359.3	82704.1	84958.7	76726.1	80053.3	85802.1	92071.2	95637.3	92378.4	94674.8	93186.5	89764.2			P12265	9137.37	8632.79	9071.3	9520	10196.3	10007.9	9407.72	8600.72	8881.7	9064.73	9212.46	8172.16	8366.6	8579.04	8884.98
1-1_GL0009843;6-1_GL0039873;6-3_GL0056201;G1-5A_GL0031161;Group2-8A_GL0235603;S-Fe8_GL0076667	2644.21	2201.14	1806.66	1161.69	1361.5	916.07	1305.83	1130.86	NA	NA	NA	NA	NA	NA	NA			P12382;Q9WUA3	1626.27	1797.69	1474.66	1275.07	NA	1009.92	859.923	1946.8	1099.13	NA	NA	1598.02	NA	NA	NA
1-1_GL0009843;6-6_GL0112695	11856.4	11555.3	11727.8	NA	6698.49	NA	9121.44	9992.37	9595.05	10183.7	12227.2	10080.7	9757.76	8643.43	9671.38			P12787	9025.47	9115.11	9295.71	15058.3	16105.8	15068.8	14396.4	15043	14794.5	13499.5	11775.6	11520.4	10859.2	10693.6	8691.89
1-1_GL0010110;1-1_GL0011358;1-1_GL0091513;1-6_GL0017811;1-8_GL0006211;11_GL0028376;11_GL0108772;1A-dyr2-07_GL0066529;1A-dyr4-07_GL0005233;2-2_GL0114153;2-3_GL0002598;20_GL0034432;28_GL0023200;3-5_GL0005950;3-5_GL0037612;35_GL0130831;37_GL0016532;37_GL0064322;40_GL0047200;5-6_GL0012253;6-3_GL0073361;6-5_GL0072187;7-8_GL0106456;8-5_GL0086787;G1-5A_GL0169276;Group2-5A_GL0004763;MC-0-1_GL0022870;MC-0…	295083	352857	327875	NA	NA	NA	NA	NA	NA	NA	NA	NA	NA	NA	NA			P12815	2447.34	2496.82	2901.73	2973.86	2100.66	3319.88	NA	NA	3081.71	NA	NA	NA	NA	NA	NA
1-1_GL0010110;1-1_GL0011358;1-1_GL0091513;37_GL0016532;40_GL0047200;MC-0-1_GL0022870;MH-0-3_GL0068860;S-Fe10_GL0056937;S-Fe10_GL0134058;S-Fe10_GL0143701;S-Fe12_GL0013137	137400	153515	149598	141175	141407	143544	113322	122763	130490	122659	130293	131628	122630	109624	123146			P12970	6869.48	7608.26	6989.02	6232.76	6373.48	6491.93	6528.28	6947.57	6298.46	5605.24	4890.59	4701.93	5009.88	7226.01	NA
1-1_GL0010110;1-1_GL0011358;14_GL0090199;40_GL0047200;MC-6-2_GL0150055;S-Fe10_GL0134058;S-Fe11_GL0043926	44326.8	41177	41581.5	40774.9	40394.4	38954.8	29614.3	33260	34449.9	29951.9	35688.3	31330.9	30873.7	34594.8	28392.1			P13020	10852.2	10849	10441.9	11047.2	10925.4	11055.9	11578.7	11351.4	11062.6	10084.5	9101.03	14484.5	14105	13092	8142.32
1-1_GL0010110;1-1_GL0011358;40_GL0047200	772.834	NA	NA	7518.13	6286.46	6868.86	7975.74	8902.83	7903.64	7899.12	9482.7	9248.55	9065.6	8410.88	5629.11			P13542;Q02566;Q5SX40	9393.24	7715.51	5948.24	10151.2	9650.03	9665.22	10175.5	10166.9	9144.42	6431.32	6271.51	6363.32	7145.33	5521.75	7178.6
1-1_GL0010110;37_GL0016532;40_GL0047200;6-5_GL0008930;MC-0-1_GL0022870;MH-0-3_GL0068860	5529.41	4273.51	4074.34	1053.9	1465.41	NA	NA	NA	NA	NA	NA	NA	NA	NA	NA			P13542;Q5SX40	6132.28	6889.15	7348.11	5465.98	5461.22	5970.69	7006.83	6088.68	5874.89	NA	7204.96	NA	NA	8848.12	11193
1-1_GL0010110;40_GL0047200	6763.14	6924.6	7522.26	6683.25	7008.87	6677.73	5239.64	5336.51	6921.04	5544.09	7829.12	4903.4	2863.43	NA	5418.52			P13634	169373	168295	183339	178265	180460	180214	180141	191347	195219	162083	172980	171533	153152	191175	173823
1-1_GL0010110;MC-0-1_GL0022870;MH-0-3_GL0068860	1418.94	1218.45	1186.58	852.456	NA	NA	NA	NA	NA	NA	NA	NA	NA	NA	NA			P14069	81149.4	69248.5	67464.4	85174.5	94960.6	91974.5	131077	122942	131082	152143	121839	141567	138672	173687	181532
11_GL0010402	42610.3	44335	44422.6	32953.3	37106.6	38982.2	45939.8	43738.3	47212.4	29687.3	35533.9	37171.6	33490.1	36399.9	32008.5			P14094	141455	136406	141328	129518	134339	141094	132755	134582	133721	116457	126545	119941	111606	115744	108769
11_GL0010402;11_GL0053374;1A-dyr4-07_GL0028776;3-7_GL0067223;4-2_GL0084916;6-3_GL0057956;6-5_GL0061757;S-Fe9_GL0038199	13320	11660.9	13791.8	9386.02	9648.91	9079.58	8017.89	8815.51	9380.43	8608.87	NA	NA	NA	NA	NA			P14115	6039.5	5934.48	5538.28	5672.5	5570.53	6652.44	4840.21	NA	4648.31	7865.37	9266.48	6282.25	6284.79	NA	8390.19
11_GL0010402;20_GL0075449;4-7_GL0095119;6-2_GL0018346;7-8_GL0014644;MH-6-4_GL0054736;MH-6-4_GL0125371	NA	NA	1407.72	25265.6	20909.2	21211.4	26981.3	25790.9	22688.7	NA	NA	NA	NA	NA	NA			P14131	4748.55	4975.47	4305.36	11107.7	10467.5	11713.2	12732.6	12616.3	12418	12377.7	13830.7	12867.2	11367	11914.5	10828
11_GL0010402;4-7_GL0095119	NA	2829.85	NA	32822.7	34345.2	35755.5	54317.5	51274.6	43639	NA	NA	NA	NA	NA	NA			P14148	4057.17	4059.47	4276.7	5476.24	5219.44	5179.89	5236.06	6307.19	5561.27	4472.19	5518.78	NA	6001.21	5490.76	NA
11_GL0010649	14749.7	11772.5	13698.3	12331.9	12656.9	12162.4	11986.2	12331.9	13117.1	10710.7	13266.7	9839.37	10855.1	10240.2	9807.05			P14152	69460.8	64201.1	65101.1	68056.7	63982.6	65375.4	57884.4	61729.2	64316.5	53791.6	60327.5	62068.8	55138.6	54992.2	54585.7
11_GL0010649;11_GL0153043	7876.77	8217.15	8191.17	8431.1	8374.13	8113.67	7566.21	8107.34	8945.62	4881.15	3176.15	NA	3180.13	3680.32	NA			P14206	2597.07	2707.35	2821.4	3234.77	2780.05	2908.7	3307.82	3699.71	2502.13	3735.48	NA	NA	NA	NA	NA
11_GL0010649;11_GL0153043;5-8_GL0118237;S-Fe7_GL0297624	10493.4	9768.09	10640.3	24539.7	26384.3	25769.3	28953.7	28071.2	27812.7	22579.9	30485.1	28720.6	31367.5	26196.5	29255			P14211	9145.36	22859.8	13934.4	17622	17763.9	18793.9	19422.8	18791.8	18963.6	24057.9	18371.9	22267	21050.7	18815.4	19483.6
11_GL0010649;17_GL0083320;1A-dyr4-07_GL0106169;5-8_GL0118237	14489	14622.4	14647.8	16975.1	17789.9	NA	16242.5	14149.5	16520.9	14000.7	20093.4	11453	17361.5	18372.9	12639.6			P14432	1584.48	1667.46	1757.06	1888.36	NA	1681.84	NA	NA	NA	NA	NA	NA	NA	NA	NA
11_GL0010649;5-8_GL0118237;S-Fe7_GL0297624	10905.8	10747	9701.63	10888.1	10377.9	11421	11597.4	11054	11459.3	NA	NA	NA	NA	NA	NA			P14434;P14438	5423	6828.72	5360.21	5417.77	5317.77	4523.59	5852.66	6813.52	6143.28	NA	NA	NA	NA	NA	NA
11_GL0010649;S-Fe7_GL0297624	12536.6	13512.7	15070.9	21913	22178.4	22945.8	20192.6	19182.3	22731.4	23461.4	21109.7	17108	19150	20414.9	22546.1			P14483	18155.2	16417.7	17388.3	18493.5	16161.2	16383	16011	18995.8	18589.1	11845.2	12093.8	12172.8	12377.6	12460.9	10782.9
11_GL0010650	32246.5	34411.8	31496.3	33586.7	34803.2	34533.3	27627.7	27295.2	33082.2	24530.1	22923.7	29126	26706.4	32813	NA			P14733	1987.62	1929.27	2059.06	1356.2	1292.03	1474.19	NA	NA	NA	NA	NA	NA	NA	NA	NA
11_GL0010650;2-4_GL0102869;5-7_GL0067986;S-Fe2_GL0121794	4718	7077.58	6584.92	10852.4	10104.5	8099.71	NA	7107.85	6020.67	NA	NA	NA	NA	NA	7093.49			P14824	2872.73	3267.09	2999.04	2758.06	NA	NA	NA	2459.32	3774.93	NA	NA	NA	NA	NA	NA
11_GL0010650;5-7_GL0067986	2253.9	2245.04	2588.04	1613.5	1934.67	2149.56	1894.58	2381.89	1624.32	NA	NA	NA	NA	NA	NA			P14824;P97429	3686.2	3606.05	NA	NA	NA	NA	NA	NA	19824.2	NA	NA	NA	NA	NA	NA
11_GL0010650;5-7_GL0067986;S-Fe2_GL0121794	NA	NA	NA	23924.6	23149.5	23990.1	NA	29911.6	29127	NA	NA	NA	NA	NA	NA			P14847	2462.37	2800.37	2997.75	NA	NA	NA	NA	NA	5889.55	NA	NA	NA	NA	NA	NA
1-1_GL0011263	4503.02	4191.59	4448.41	4706.48	5046.59	4579.36	3789.36	4154.85	4487.54	NA	NA	NA	NA	NA	NA			P14869	4017.58	4059.88	3859.98	6338.77	6499.02	7529.14	7369.42	6629.37	NA	7522.63	NA	NA	8774.81	NA	NA
1-1_GL0011263;1-1_GL0108993;1A-dyr1-07_GL0020514;1A-dyr2-07_GL0064584;1A-dyr5-06_GL0013898;2-1_GL0015271;2-1_GL0076259;2-1_GL0084165;2-2_GL0079900;2-2_GL0129080;2-3_GL0014793;26_GL0143043;29_GL0023124;29_GL0054160;2A-dyr14-06_GL0036622;34_GL0079617;5-1_GL0049746;5-2_GL0064268;6-2_GL0091659;6-3_GL0118595;7-3_GL0070741;7-5_GL0063140;8-3_GL0125327;8-5_GL0030763;G1-3A_GL0067553;G1-5A_GL0198494;MH-6-2…	415445	442150	391789	636173	560606	607813	664973	608617	607348	NA	NA	NA	NA	NA	NA			P15626	2010.12	2391.27	1982.83	2656.73	2300.86	2139.99	NA	2308.25	2031.92	NA	NA	NA	NA	NA	NA
1-1_GL0011263;1-1_GL0108993;2-1_GL0076259;2-2_GL0079900;26_GL0143043;29_GL0023124;34_GL0079617;5-1_GL0049746;8-1_GL0126821;G1-3A_GL0067553;G1-5A_GL0198494	7744.66	6271.21	8832.38	4943.61	3991	3502.4	3118.48	4744.99	3769.52	1343.17	1424.09	1030.75	NA	NA	3094.39			P15947	766444	779681	792801	904639	883096	892056	860221	878591	878361	733667	746242	740737	698616	713141	723608
1-1_GL0011263;1-1_GL0108993;2-2_GL0079900;29_GL0023124;34_GL0079617;5-1_GL0049746;8-1_GL0126821;G1-3A_GL0067553;G1-5A_GL0198494	NA	11124	10708.4	NA	NA	NA	NA	NA	NA	NA	NA	NA	NA	NA	NA			P16110	5239.13	5262.13	5598.83	NA	NA	NA	NA	NA	NA	NA	NA	NA	NA	NA	NA
1-1_GL0011263;11_GL0121982;1A-dyr1-07_GL0020514;1A-dyr2-07_GL0034958;1A-dyr2-07_GL0064584;1A-dyr3-06_GL0017534;1_GL0014036;2-1_GL0076259;2-1_GL0084165;20_GL0010443;26_GL0143043;2A-dyr14-06_GL0036622;37_GL0018308;6-2_GL0091659;7-5_GL0044338;7-5_GL0063140;S-Fe10_GL0021310	15597.1	12760	13521.1	497071	459822	490707	481429	457663	463092	656505	666074	700296	715800	703375	642464			P16381;Q62095;Q62167	NA	905.885	NA	NA	NA	NA	NA	NA	NA	NA	NA	NA	NA	NA	NA
1-1_GL0011263;2-2_GL0079900;20_GL0010443;29_GL0023124;29_GL0054160;5-1_GL0049746;8-3_GL0125327;G1-5A_GL0198494	111738	78989.5	80627.6	126988	123663	107911	122766	124116	141052	92761.3	97031.4	79819.8	105958	88672	89261.1			P16406	163410	169218	164076	193782	191657	197916	193253	199714	196068	196698	208446	206112	200822	194592	196697
1-1_GL0011263;2-2_GL0079900;2-3_GL0014793;29_GL0023124;29_GL0054160;5-1_GL0049746;8-3_GL0125327;G1-5A_GL0198494	121354	111986	112435	83306	78617.2	69155.2	22052.2	NA	NA	NA	10582.2	14415.2	12496.9	9319	7338.24			P16546	9130.04	10676.7	9747.94	12487	11682.6	12910.8	13311.4	12380.4	12460.9	12615.1	13835.6	13682.4	12949.6	NA	15763.5
1-1_GL0011263;2-2_GL0079900;29_GL0023124;29_GL0054160;5-1_GL0049746;8-3_GL0125327;G1-5A_GL0198494	6279.45	7756.36	8529.54	NA	NA	NA	NA	NA	NA	NA	NA	NA	NA	NA	NA			P16627	10923.5	10337	11600.7	7792.26	6079.24	NA	6052.76	NA	4166.47	49655.6	NA	NA	NA	NA	NA
1-1_GL0011263;2-2_GL0079900;29_GL0054160;2A-dyr14-06_GL0036622;5-1_GL0049746;G1-5A_GL0198494	12590.3	10522.4	12198.8	8356.13	8219.97	6970.92	7701.38	7458.96	6744.76	2029.34	1523.84	NA	2698.81	NA	NA			P16627;P20029;P63017	40709.7	40331.4	39331.1	37921.6	37799.7	36927.2	37298.6	39157.1	37477.9	33463.2	33919.2	32699.6	35317.3	34295	30506.9
1-1_GL0011263;6-2_GL0091659	6741.16	7462.12	6899.12	6786.51	5940.99	6320.02	6574.66	6771.65	5402.14	NA	6478.37	5174.2	NA	4769.9	6574.01			P16627;P63017	NA	NA	NA	35459.4	NA	NA	34423.8	38839.1	25387.2	41765.6	37869.7	NA	NA	NA	40898.4
11_GL0011325;11_GL0026527;14_GL0001317;17_GL0139147;1A-dyr4-07_GL0048160;2-1_GL0030314;20_GL0005185;20_GL0012397;20_GL0175919;2_GL0001740;4-2_GL0041327;5-1_GL0073769;5-2_GL0102417;5_GL0152003;6-7_GL0026521;G1-2A_GL0010340;G1-2A_GL0083575;G1-5A_GL0015696;Group2-4A_GL0121168;Group2-6A_GL0037095	34377.1	35660.4	32028.9	NA	NA	NA	NA	NA	NA	NA	NA	NA	NA	NA	NA			P16675	NA	2818.95	NA	2244.81	1916.52	2280.19	2172.91	NA	NA	NA	NA	NA	NA	NA	NA
11_GL0011325;11_GL0026527;14_GL0001317;1A-dyr4-07_GL0048160;20_GL0175919;6-7_GL0026521;G1-5A_GL0015696;S-Fe20_GL0026058	14379	15970.7	15652.6	16086.9	15641.1	16223.1	13872.1	14123.4	12933.7	8041.96	10227.5	15892.4	7384.17	NA	12349.6			P16858	67645.3	94220.5	82290.7	92938.5	83439.4	84463.5	75021.9	79000.9	79831	61241.7	66898.5	51515.2	67805	67564.9	60719.9
1-1_GL0011358	2702.91	2901.79	3149.79	3404.86	3381.45	2977.03	2643.5	2876.59	3093.57	NA	NA	NA	NA	NA	NA			P16858;Q64467	4498.19	3510.75	11302.3	10267.7	10902.9	11963.7	11371.4	10711.9	9954.2	9657.99	10128.2	10811	11326.2	NA	8081.52
1-1_GL0011358;1-1_GL0091513;28_GL0023200;37_GL0016532;MC-0-1_GL0022870;MC-6-3_GL0041016;MH-0-3_GL0068860;S-Fe10_GL0143701;S-Fe12_GL0013137;S-Fe13_GL0093499	77327.4	NA	86485.3	115702	116697	96315.6	113423	NA	108849	80015	82840.9	68033.6	73135.1	82658.5	NA			P17047	7945.51	7932.37	8499.18	10365.7	11333.8	11455.7	11838.7	11742.2	11308	15896.4	16022.7	14738.9	NA	15075	NA
1-1_GL0011358;37_GL0016532;4-1_GL0044489;MC-0-1_GL0022870;MH-0-3_GL0068860	36916.4	30461	30196.7	20095.2	23420.7	17234.9	23517.2	22656.2	18761.5	NA	NA	NA	NA	NA	NA			P17182	29265.1	29254.5	27876.8	27576.7	27901.5	27266.8	26853.1	27874.9	26925.4	24744.9	24944.8	23367.3	20987.3	21788	22953.3
1-1_GL0011358;37_GL0016532;S-Fe10_GL0134058	3138.96	8714.05	3671.77	NA	NA	NA	NA	NA	NA	NA	NA	NA	NA	NA	NA			P17427	3801.68	3313.57	3608.8	NA	4084.82	NA	NA	NA	NA	NA	NA	NA	NA	NA	3225.37
1-1_GL0011409;1-1_GL0097718;1-1_GL0125183;1-3_GL0027415;14_GL0041674;2A-dyr16-07_GL0072563;3-6_GL0008151;5-8_GL0010434;52_GL0005030;7-5_GL0036750;MC-0-1_GL0027857;MH-6-1_GL0086685;MH-6-3_GL0157415;S-Fe20_GL0191821	16992.6	18265.6	20664.8	NA	NA	NA	NA	NA	NA	NA	NA	NA	NA	NA	NA			P17439	2986.24	3080.02	2903.53	3639.71	3432.67	2929.03	3732.81	3704.87	3267.12	NA	2719.37	NA	NA	NA	NA
1-1_GL0011409;1-1_GL0097718;1-1_GL0125183;1-3_GL0027415;52_GL0005030;MC-0-1_GL0027857;MH-6-1_GL0086685;MH-6-3_GL0157415	7966.47	7993.28	8225.95	NA	NA	NA	NA	7089.77	7273.84	NA	NA	NA	NA	NA	NA			P17533	5067.71	5676.09	4916.45	3860.13	4244.2	4958.63	3485.27	3623.67	3131.04	3618.33	3214.84	2540.24	2474.5	2846.81	3205.69
1-1_GL0011767	4531.52	4557.23	4123.57	4021.76	4508.69	4351.61	4633.23	4427.16	4099.37	3855.06	5371.8	4252.97	5966.64	NA	6367.61			P17563	251963	229128	215140	213938	211167	213456	207257	197719	202161	158143	182340	166534	175834	201158	196875
1-1_GL0012052	8384.98	9153.59	9300.47	8792.39	8834.02	8971.92	9124.76	8434.37	9405.35	8621.91	7660.41	7537.85	7187.03	7638.56	6909.32			P17665	3933.85	NA	NA	NA	5393.78	NA	NA	NA	NA	NA	NA	NA	NA	NA	NA
1-1_GL0012145;11_GL0034911	12686.3	12027.3	11733.3	11363.6	10571.6	11421.6	12180.8	10094.7	11203.5	11459.2	9040.99	10686.5	11961.3	NA	10331.5			P17710	6639.51	7716.49	6851.9	8602.15	8208.39	7432.58	9405.78	9904.24	9008.57	9158.12	NA	12530	NA	9400.87	6232.35
1-1_GL0012145;11_GL0034911;3-5_GL0085079;G1-5A_GL0200115	6855.19	7618.55	7240.06	6684.76	8968.25	7885.31	6474.87	7689.28	5623.06	4457.71	NA	NA	NA	NA	NA			P17742	19697.8	19259.1	18288.1	21242.8	19602	21314.3	22521.7	21873.5	22786.4	21385.1	21384	20888.2	20280	22474.6	19781.6
11_GL0012274	3851.35	3736.92	3413.66	3645.24	3453.29	2823.48	3269.72	3326.56	3536.68	4435.88	NA	1885.3	NA	1814.38	NA			P17751	15712.1	15721.3	14976.4	18158.6	16203.2	18708.2	18078.6	16546	15063.7	15359.6	15081.1	14834.9	15206.4	13761.3	17999.9
11_GL0012274;2-5_GL0019211;4-7_GL0137209;5-7_GL0003557;5-8_GL0143660;6-7_GL0036393;Group2-2A_GL0051349;Group2-7A_GL0006144;Group2-8A_GL0132537;MC-6-2_GL0028893;S-Fe2_GL0188224	48957.1	90378.4	87454.4	90631.2	97769.5	94509.8	82469	90541.4	97312.4	85953.5	88225	85433.7	95593.3	77309	96833.7			P17879;Q61696	839.792	811.724	NA	906.322	452.709	NA	NA	978.07	921.451	NA	NA	NA	NA	NA	NA
11_GL0012274;2-5_GL0019211;4-7_GL0137209;5-7_GL0003557;5-8_GL0143660;Group2-3A_GL0095108;Group2-8A_GL0076108;Group2-8A_GL0132537;MC-6-2_GL0028893;S-Fe2_GL0188224;S-Fe7_GL0290151	10347.5	9781.95	10455.6	9034.92	9205.63	9116.39	7263.73	7950.15	6760.93	6066.94	5265.37	3910.29	3977.87	4624.22	4473.45			P17892	206359	222272	197256	191601	201448	186026	201712	190753	186562	145647	129240	124970	110148	112233	106371
11_GL0012274;2-5_GL0019211;4-7_GL0137209;5-7_GL0003557;Group2-3A_GL0095108;Group2-8A_GL0076108;Group2-8A_GL0132537;MC-6-2_GL0028893;S-Fe2_GL0188224	70357.6	66628.6	62414.2	79328.8	75868.1	85379.2	78740.2	NA	77148.9	70675.7	82046.4	70573.4	76098.6	79309.5	NA			P17897	65299.3	108741	115312	125400	140189	124052	128486	145772	142169	116066	129164	124248	131702	129332	125583
1-1_GL0013371	3071.95	3153.69	3334.03	2947.39	3021.14	2850.44	3362.65	3107.02	3672.31	NA	NA	NA	NA	NA	NA			P18242	9522.86	9673.9	10057.7	8897.35	9968.76	9369.85	8776.47	7614.63	8296.72	7843	10266.3	5532.48	NA	NA	10037.7
1-1_GL0013371;MC-6-1_GL0049868;S-Fe10_GL0064312	24969.6	22528.3	26424.9	27293.6	23702.4	21456.3	26013.8	24172.6	26138.8	NA	NA	10831.9	17846.9	15645.5	NA			P18524	6847.07	6608.26	6195.78	6379.39	6369.8	5133.06	5556.16	6300.21	6026.45	4341.26	2445.69	NA	3591.42	NA	4185.15
1-1_GL0013372;1-1_GL0082194;1-1_GL0095242;40_GL0038719;S-Fe19_GL0084219	6844.33	7806.18	7295.59	7584.57	7867.07	8614.17	7153.42	8333.28	8479.02	7241.08	8713.36	NA	NA	NA	NA			P18525	90736.8	89221	86729.8	89095.3	90575.6	90781.3	82909	79704.6	83238.8	72459.5	69235.3	72578.9	68357.2	61307.1	65086.7
1-1_GL0013372;1-1_GL0095242;40_GL0038719;S-Fe10_GL0170082;S-Fe19_GL0084219	9315	7773.31	8792.07	9111.11	8762.81	7482	7561.13	9612.72	7917.84	NA	NA	NA	NA	NA	4379.09			P18531	26156.3	23641.3	22436.3	18964.6	16315.5	17917.9	16901	18141.6	15865.8	11134.5	11982.6	10399.2	11089.6	8331.54	11254.6
1-1_GL0013372;40_GL0038719;S-Fe10_GL0170082	NA	NA	NA	4212.03	4413.11	3449.3	NA	NA	NA	NA	NA	NA	NA	NA	NA			P18572	29404.2	29355.6	29101.4	39241	38967.7	40152.7	39651.6	40369.4	39709.4	41503.1	41468.1	43274	43445	44514.7	45881.5
1-1_GL0013372;40_GL0038719;S-Fe19_GL0084219	26813.3	26966.9	28727.1	NA	18493	NA	NA	NA	NA	NA	NA	NA	NA	NA	NA			P18760	13084.5	12173.1	13136.2	12442.4	12856.2	13166	12810.1	10553.1	11578.5	9240.48	9674.67	9389.69	10790.1	9904.5	8120.34
11_GL0013664	8881.89	8643.69	8546.21	NA	7352.48	8063.56	7073.47	7086.74	7673.24	NA	NA	NA	NA	NA	NA			P18761	199740	233265	321181	219908	221662	199658	213628	227208	216060	152460	150613	124225	137457	108305	165874
11_GL0014135;1A-dyr4-07_GL0045601;6-6_GL0074506;Group2-8A_GL0206293	16817.6	15641.5	15239.4	NA	NA	NA	NA	NA	NA	NA	NA	NA	NA	NA	NA			P19001	127239	106298	114197	126802	119845	120665	125420	119077	116595	104649	98429.8	100091	96033.7	102001	95827.1
11_GL0014135;6-6_GL0074506	2927.33	3114.64	2823.17	3195.86	2608.94	2130.87	2759.85	2100.61	2738.44	1652.44	NA	NA	NA	NA	NA			P19001;Q6IFX2;Q9QWL7	112759	76223.8	113739	114731	102088	106730	106383	105624	111614	131514	130813	115218	137097	117898	119615
1-1_GL0014250;1-1_GL0095657;1-2_GL0125028	28341.7	23573.4	22494.7	16960.9	17393.6	12805.2	18877.5	18204.6	19734.7	NA	14700.6	NA	NA	NA	NA			P19096	2308.97	2433.38	2406.2	2048.59	2236.28	2110.15	2394.4	2211.53	2943.16	NA	NA	NA	NA	NA	NA
1-1_GL0014250;1-2_GL0125028	11413.7	11620.8	10244.1	8576.25	7524.85	7918.21	7397.92	10908.7	9235.87	6825.19	NA	NA	6181.89	10176.9	NA			P19157	7165.97	6759.11	7263.68	5329.11	4587.95	4949.3	5596.32	5228.69	5339.74	3546.16	3262.99	2785.1	NA	3736.61	3248.24
1-1_GL0014587;10_GL0045525;MC-0-3_GL0054813;MC-6-2_GL0114686;S-Fe10_GL0091615	15082.8	15132.7	14980.5	NA	10171.6	11650.6	NA	NA	NA	NA	NA	NA	NA	NA	NA			P19253	7478.54	9005.26	7831.49	6602.38	6533.24	6200.52	7067.17	6517.47	5662.62	3885.76	5036.86	4906.72	4935.48	4737.98	NA
1-1_GL0014587;S-Fe10_GL0091615	15604	17509.7	17071.8	38553.4	40049.2	NA	NA	30440.4	30129.4	NA	NA	NA	NA	NA	NA			P19467	90748.2	82736.8	80759.9	84619.1	85286.2	80736.9	77572	74539.7	71691.1	68804.4	59105.7	60556.7	62795.6	62705.8	60364.6
1-1_GL0014825;6-5_GL0021958;G1-7A_GL0160633	2657.4	2881.57	2799.72	3176.6	2988.92	3080.84	2585.17	2436.97	2543.76	3432.69	3005.93	2761.25	4426.86	NA	2087.83			P19536	7045.22	6749.64	7064.21	7712.44	8657.97	7936.71	6313.43	6449.13	7333.99	5382.61	7047.22	NA	7263.1	NA	6449.5
11_GL0014868	49482.7	49665.2	49271.6	50504.3	51482.4	51298	49735.6	52624.5	51792.7	51112.9	52589.5	52112.8	50819.4	47668.2	49095.2			P19783	52428.6	55732.9	52584.9	48937.1	46888.9	45686.1	54119.9	54806.7	59476.4	52008.6	51886.9	51101.2	49353.9	45716.6	58637.7
11_GL0014868;3-5_GL0033094	42295	40973.4	39684.7	37453.1	36878	35465.6	37105.5	39032.1	37474.9	33646.6	35004.2	34320.6	33570.1	34751.5	34959.5			P20029	39319.4	38935.5	37255.4	41161.5	38270.1	39610.7	40931.2	41328.4	40854.2	34173.9	37830.7	35846.2	35043.4	38521.8	35976.6
11_GL0014907	2206.05	1774.02	1985.32	1382.84	2460.02	1437.46	1334.29	1169.24	1704.31	NA	NA	NA	NA	NA	NA			P20029;P63017	NA	NA	NA	NA	NA	10069.4	10511.7	NA	9384.21	NA	8255.57	9050.13	NA	8862.27	12953.1
11_GL0014907;2-8_GL0070180;20_GL0075659;Group2-8A_GL0149820;MC-0-3_GL0022317	18362.2	19194.3	18335.2	NA	NA	NA	NA	NA	20891	NA	NA	NA	NA	NA	NA			P20060	7506.32	8957.74	10051.3	8591.19	8499.26	7691.82	8273.77	8763.31	8331.25	11616.2	10031.4	10389.3	8914.05	12310.3	12168.2
11_GL0014907;2-8_GL0070180;20_GL0075659;MC-0-3_GL0022317	17289.9	19372.8	15223.6	21400.3	20675.1	18247.2	25700.4	25526.9	25165	19707	17946.6	16974.4	19435.2	16753.6	22166.5			P20108	NA	3853.22	NA	4916.6	5138.77	4863.49	5539.18	5414.92	5269.72	6589.81	6280.26	NA	NA	NA	NA
1-1_GL0014971;3-5_GL0123684;8-3_GL0099509	2954.86	3107.51	2927.55	3165.92	2409.17	3303.71	NA	1942.2	NA	NA	NA	NA	NA	NA	NA			P20444	10794.4	10471.3	9500.95	14971.4	14731	16980.1	13064.5	13330.4	14914.3	NA	8189.23	NA	NA	NA	NA
1-1_GL0014971;8-3_GL0099509;Group2-1A_GL0029726	4317.62	4653.93	4636.15	3123.95	3390.28	2996.94	3465.33	5137.77	4087.7	3479.9	NA	2893.35	NA	NA	2451.92			P21107	3834.77	3941.32	4505.94	4236.14	4358.44	NA	NA	NA	NA	NA	NA	NA	NA	NA	5666.03
11_GL0015040	5064.99	4889.27	4800.45	6314.17	5925.95	5544.65	6591.18	5672.5	5653.73	6304.56	6877.68	6208.79	NA	2657.83	9404.91			P21107;P58771	5332.02	5900.33	4968.88	3900.44	3600.64	3685.94	4517.97	4380.67	5889.93	NA	NA	NA	NA	NA	NA
1-1_GL0015108	22315.5	23945	25082.3	23252.5	20621.3	21990.8	22865.2	21521.6	20256.5	24483.1	22591.8	21427.5	22983.1	20625.9	23634.8			P21278	7706.03	7393.58	7592.29	6048.06	6172.59	6540.87	8241.66	8232.98	6960.05	3815.89	4461.71	NA	5621.16	NA	3124.78
1-1_GL0015108;MC-0-3_GL0069398	NA	29386.4	28332.2	4391.56	NA	NA	12349.5	8264.42	12027.4	22100.5	16887.6	14486	15796.7	18523.1	18729.4			P21278;P21279	8869.04	10937.4	12937.2	12040.7	11382.2	12427.2	12478	14745.4	13391.9	14357.3	NA	NA	NA	NA	NA
11_GL0015288	11963.2	11977.1	12141	8994.46	9649.85	8275.61	8068.33	9368.64	7821.03	4413.37	3736.2	4099.56	3902.14	3315.2	NA			P21447	34716	35593.3	34555	38021.1	37475.8	38917.2	40060.3	39209.1	40245.5	38377.2	37461.2	39258.3	39751.7	39553.1	41284.4
11_GL0015288;1A-dyr4-07_GL0093212;3-1_GL0085386;4-7_GL0127008;4-7_GL0132820;4-8_GL0078270;5-2_GL0022232;5-2_GL0103665;5-7_GL0107009;6-7_GL0039704;8-2_GL0009262;8_GL0142198;Group2-4A_GL0154951;Group2-7A_GL0062225;MC-6-1_GL0019122;S-Fe10_GL0058389;S-Fe10_GL0069545;S-Fe8_GL0104469	95994.4	123137	114495	465178	463129	455561	478924	477043	455391	456217	465146	462085	460331	424815	466484			P21460	2678.89	2348.23	2413.44	NA	NA	NA	NA	NA	NA	NA	NA	NA	NA	NA	NA
11_GL0015288;1A-dyr4-07_GL0093212;3-1_GL0085386;4-7_GL0127008;4-7_GL0132820;4-8_GL0078270;5-2_GL0103665;5-7_GL0107009;6-7_GL0039704;7-5_GL0122860;8-2_GL0009262;8_GL0142198;Group2-4A_GL0154951;Group2-7A_GL0062225;MC-0-1_GL0059229;MH-6-5_GL0074415;S-Fe10_GL0058389;S-Fe20_GL0132961;S-Fe8_GL0104469	3746.66	2740.68	1377.81	7722.98	7804.3	NA	NA	NA	NA	NA	NA	NA	NA	NA	NA			P21550	7547.08	8045.98	6992.02	7879.78	8478.68	8949.09	7838.11	7840.68	8318.55	9847.83	10870.5	9047.13	12405.3	7673.75	7252.42
11_GL0015288;1A-dyr4-07_GL0093212;4-7_GL0127008;4-7_GL0132820;4-8_GL0078270;5-2_GL0022232;7-5_GL0122860;8-2_GL0009262;8_GL0142198;Group2-4A_GL0154951;Group2-7A_GL0062225;S-Fe10_GL0058389;S-Fe8_GL0104469	14850.1	13670.2	14592.4	8396.52	6420.68	8542.38	6632.14	7760.11	5736.33	NA	NA	NA	NA	NA	NA			P22599	38672.3	44685.7	40974.6	40532.6	35666.5	31188.9	35016.9	34431.9	33882.4	17935.7	18031.1	19431.4	17930	17004.3	21567.2
11_GL0015288;1A-dyr4-07_GL0093212;4-7_GL0132820;5-2_GL0022232;8_GL0142198	NA	NA	NA	NA	NA	NA	4249.95	4231.67	NA	18491.6	21807.2	18863.3	32365.2	32427.3	28053.5			P22599;Q00897	149284	144323	141187	144399	144553	137259	129686	139097	149473	167473	166116	122135	102220	154991	121706
11_GL0015288;4-7_GL0127008;4-7_GL0132820	25766.8	23120.1	24721.4	22508.9	21760.1	21835.5	24984.9	22713.4	24126.8	23837.5	NA	21515.4	NA	21041.5	19278.1			P22599;Q00897;Q00898	260812	257257	235296	428068	427612	461579	367332	383776	397482	NA	NA	NA	NA	NA	NA
1-1_GL0015695	11716.4	12154.9	12114.2	12116.9	11414	12031	11753.5	11731.8	12184.6	11710.4	10612.2	11223.7	9427.72	10433.2	10593.8			P22599;Q00898	NA	753.872	823.323	1159.01	1064.92	NA	955.566	1158.63	965.565	NA	NA	NA	NA	NA	NA
1-1_GL0015695;MC-6-2_GL0157885;S-Fe10_GL0011383	23608.6	21431.8	22211.9	48303.2	45481.1	48117.9	46020.7	51995.4	50037.2	40753.3	49483.3	45409.9	44147.5	45412.2	47705.2			P23492	2247.9	2223.89	2474.39	2643.3	2561.54	2732.97	NA	2229.82	NA	NA	NA	NA	NA	NA	NA
1-1_GL0015696	6807.77	7490.97	7550.62	6849.98	6118.53	6091.75	5074.59	5929	5607.88	5907.56	6460.65	3693.77	4310.13	2339.29	5590.32			P23591	705.145	923.242	978.946	NA	NA	NA	NA	NA	NA	NA	NA	NA	NA	NA	NA
1-1_GL0015814	1107.57	1006.51	820.792	NA	NA	679.354	NA	NA	NA	NA	NA	NA	NA	NA	NA			P23780	6729.95	6596.16	6360.22	7353.52	6719.35	8257.25	7868.66	7065.48	7844.53	7044.37	6449.15	8313.98	8089.76	6779.89	6741.34
1-1_GL0015814;6-4_GL0006541;Group2-3A_GL0186028;MH-6-4_GL0059762	4973.04	4867.96	5838.31	4971.31	3932.36	2962.8	2757.73	2528.55	3687.25	NA	1642.67	NA	NA	NA	NA			P23953	2873.24	2484.9	2397.63	2322.58	2235.87	1792.2	2175.38	2291.32	1572.85	NA	NA	NA	NA	NA	NA
1-1_GL0015814;Group2-3A_GL0186028	NA	NA	7520.46	NA	NA	8610.71	8181.57	13754.9	NA	NA	NA	25689.7	NA	NA	NA			P23953;Q8VCC2;Q8VCT4	18571.1	18737	17128.9	14514	15803.5	15332.8	15556.2	16989.5	18270.8	14806.2	12268.5	13324.8	16394.8	13468.1	17112.6
1-1_GL0016117	4944.29	4654.81	5258.31	4473.87	NA	4774.88	5036.48	3990.27	3835.74	NA	NA	NA	NA	NA	NA			P24270	2614.64	2361.41	2570.64	2340.43	2335.85	2501.22	3160.79	2418.4	2757.31	23304.5	NA	NA	NA	NA	NA
1-1_GL0016635;1-1_GL0072842;1-1_GL0126610;1-2_GL0000667;1-6_GL0075906;1-6_GL0082402;10_GL0075557;11_GL0070877;11_GL0075367;11_GL0097825;11_GL0124101;13_GL0060310;14_GL0072027;14_GL0119944;14_GL0120358;16_GL0109432;1A-dyr2-07_GL0000560;1A-dyr4-07_GL0087490;2-1_GL0074457;2-2_GL0044042;2-2_GL0090932;2-2_GL0119774;2-3_GL0049929;2-5_GL0054484;2-7_GL0060340;2-7_GL0102068;2-8_GL0072932;3-3_GL0108994;3-5…	12274.2	14864.8	13804.7	NA	NA	NA	NA	NA	NA	NA	NA	NA	NA	NA	NA			P24369	27086.3	25663.7	26464.1	27882.5	26964.4	28257.8	26775.8	27328.1	26244.1	27004.9	28772.6	27423.1	22775.2	20506.9	23394
1-1_GL0016635;1-1_GL0072842;1-1_GL0126610;1-2_GL0000667;1-6_GL0075906;1-6_GL0082402;10_GL0075557;11_GL0070877;11_GL0075367;11_GL0097825;11_GL0124101;13_GL0060310;14_GL0072027;14_GL0119944;14_GL0120358;16_GL0109432;2-1_GL0074457;2-2_GL0044042;2-2_GL0090932;2-2_GL0119774;2-3_GL0049929;2-5_GL0054484;2-7_GL0060340;2-7_GL0102068;2-8_GL0072932;3-3_GL0108994;3-5_GL0119581;4-1_GL0035322;4-1_GL0074539;4-2…	16139.1	18053.4	8763.33	53931.7	50359.7	52138.7	144347	148672	172565	148280	146010	132161	145921	140898	134939			P24452	2614.53	2394.63	2265.44	NA	NA	NA	NA	NA	NA	NA	NA	NA	NA	NA	NA
11_GL0017325;1A-dyr5-06_GL0059240;2B-dyr24-07_GL0039540;3-1_GL0089305	51170.1	49855.3	46433.4	47357.3	45265.1	48794.9	56809.7	51564.4	56782.7	54278.1	46895.6	39085.4	46875.9	47539.3	45364			P24527	4726.78	4901.46	4609.23	4523.11	4601.04	4346.68	4231.01	4612.7	4641.04	6744.09	5312.38	7930.18	NA	5968.13	NA
1-1_GL0017506	2516.15	2594.61	2245.73	1553.62	1597.65	1297.29	1637.39	1161.26	1614.28	NA	NA	NA	NA	NA	NA			P24549	10631.7	10696	10596.4	9079.44	7965.53	8782.61	10413.6	9942.98	11327	11786.2	12583.5	11857.4	12247.4	13483.3	10504.2
1-1_GL0017506;17_GL0156635	16664.8	20943.7	19137.1	19940.7	21018.5	21365.9	23203.8	22514.6	20801.8	23336.3	22728.6	22145.1	16746	20129	21017.5			P24668	NA	NA	NA	NA	1216.8	NA	NA	NA	NA	NA	NA	NA	NA	NA	NA
1-1_GL0017506;17_GL0156635;20_GL0118731;20_GL0164740;MC-6-3_GL0102708;MC-6-4_GL0086125;MH-6-2_GL0021684;MH-6-4_GL0175531	15744	18626.2	19974.9	18907.9	NA	19845.3	19202.3	19242.9	20621.9	19167.9	NA	NA	NA	12948.2	NA			P24822	1.58829e+06	1.40567e+06	1.4849e+06	1.6726e+06	1.52665e+06	1.61634e+06	1.69171e+06	1.61858e+06	1.70287e+06	1.46424e+06	1.40503e+06	1.48971e+06	1.34447e+06	1.53936e+06	1.4958e+06
1-1_GL0017506;17_GL0156635;MC-6-3_GL0102708;MC-6-4_GL0086125;MH-6-2_GL0021684	40872.4	40419.2	41186.5	43505.9	44261.4	42593.9	44918.5	41194.5	45281.4	39896.4	42404.3	39932.3	39097.6	36037.7	36994.5			P24822;P24823	175076	106654	133209	87557.4	25314.8	80389	NA	101994	NA	52833.1	211066	NA	NA	198329	171758
1-1_GL0017506;17_GL0156635;MC-6-3_GL0102708;MC-6-4_GL0086125;MH-6-2_GL0021684;MH-6-4_GL0175531	7649.63	8992.06	8808.78	8538.7	6928.83	8972.8	6696.23	6914.03	8063.39	7818.54	8201.75	7976.18	5260.27	6595.26	6213.78			P24823	2876.64	2815.87	3064.5	2799.94	NA	3151.86	NA	NA	2044.21	NA	2095.45	NA	2525.93	NA	3387.2
1-1_GL0017506;17_GL0156635;MC-6-3_GL0102708;MC-6-4_GL0086125;MH-6-4_GL0175531	11886.6	11415.2	5497.37	48098.6	41930.2	46402.5	48513.1	48180.6	49987	39968.2	42939.1	40798	53569.1	40997.3	37340.4			P25444	6635.8	6294.88	6308.36	5140.44	5087.2	4971.15	7593.58	8311.83	8392.26	NA	7503.3	NA	8011.47	NA	NA
1-1_GL0017506;17_GL0156635;MC-6-4_GL0086125	11971.5	11973.5	12774.3	13471	13242.8	12692.9	13395.8	11920.4	12023.7	10106.1	9387.98	6880.45	8118.43	12980.7	8549.42			P26040	32887.3	33011.8	32953.1	34731.7	34104.4	34795.2	37888.1	36041.4	35724.5	36133.4	37469.8	34980.6	43298.1	36282.1	38242.5
1-1_GL0017506;17_GL0156635;MH-6-2_GL0021684;MH-6-4_GL0132126	21143.3	18019.6	18050.4	24144	23708.6	22939.4	30292	32672.4	31936.6	29737.2	31892.1	32941.4	21704.6	27693.1	27747.5			P26040;P26043	29140.9	27279.5	30184.5	24150.5	25299.1	28483.4	23765.7	23736.4	23752.7	13425.6	16873.5	11431.1	14272.5	14068.1	11978.8
1-1_GL0017506;17_GL0156635;MH-6-4_GL0132126	3516.95	3716.43	3816.19	3078.84	3227.73	3241.13	NA	NA	4213.9	NA	NA	NA	NA	NA	NA			P26150	882.485	893.805	767.223	NA	619.653	NA	1077.85	NA	NA	NA	NA	NA	NA	NA	NA
1-1_GL0017506;MC-6-4_GL0086125	4042.84	4324.25	3852.15	3169.69	3083.78	2990.93	3263.72	3164.52	3113.61	NA	NA	NA	NA	NA	NA			P26231	7199.88	6659.12	7877.38	6589.14	7610.62	7493.3	7203.79	6628.74	6747.79	6081.66	7465.56	6836.64	7329.36	10812.8	8489.65
1-1_GL0017506;MH-6-4_GL0132126	13475.2	14641.8	15413.3	17545.4	15850.8	18039.7	16761.8	16570.3	17425.5	NA	NA	NA	14792.4	19161.1	NA			P26443	8160.34	8265.67	7943.08	10040.7	10311.2	9203.49	11033.2	12318.9	10413.1	9705.37	7560.84	10332.5	NA	13668.4	NA
1-1_GL0018142	8520.04	8919.26	8731.01	9715.68	10299.9	9021.16	10012	8400.28	9412.71	7451.78	7511.45	8686.26	7419.1	8345.43	8355.11			P26638	401.441	523.658	520.345	558.765	283.223	554.835	408.806	402.773	216.461	458.14	NA	NA	NA	NA	NA
11_GL0018497	17269	17768.9	17871.8	18347.1	19154.6	19101.4	23839.1	17856.2	21477.1	21241.7	20979.3	22307.6	24536.5	18642.4	21741.8			P27005	266.847	273.098	280.143	NA	NA	NA	NA	NA	NA	NA	NA	NA	NA	NA	NA
11_GL0018497;11_GL0023226;11_GL0128753;1A-dyr4-07_GL0079687;5-4_GL0100790;6-6_GL0126785;7-5_GL0132685;G1-7A_GL0111510;MC-6-2_GL0112990;S-Fe6_GL0192593	2040.73	2416.33	2020.25	36257.7	35219.5	43695.9	49042.8	46376.8	63496.7	NA	NA	NA	NA	NA	NA			P27046	1010.67	NA	NA	NA	NA	1892.29	NA	NA	NA	NA	NA	NA	NA	NA	NA
11_GL0018497;11_GL0128753;1A-dyr4-07_GL0079687	1972.15	1650.71	1559.93	1040.22	NA	NA	638.764	NA	692.072	NA	NA	NA	NA	NA	NA			P27048;P63163	2026.22	1700.66	1506.89	6279.11	5201.3	NA	NA	5567.59	4026.46	NA	NA	NA	NA	NA	NA
11_GL0018497;11_GL0128753;1A-dyr4-07_GL0079687;5-4_GL0100790;G1-7A_GL0111510;S-Fe6_GL0192593	4113.16	3369.68	2913.98	1810.52	2689.73	1778.79	1926.9	1929.15	1263.94	NA	NA	NA	NA	NA	NA			P27601	3781.37	NA	3599.35	3291.36	3329.27	3038.88	NA	NA	NA	NA	NA	NA	NA	NA	NA
11_GL0018497;1A-dyr4-07_GL0079687	14291.9	16293.1	10782.8	15727.6	14062.2	19063.4	NA	19086.6	20269.4	NA	23679.7	NA	19463.6	18873.4	19863.7			P27659	2699.31	2460.56	2457.58	3032.9	3591.08	3254.53	3281.34	3584.04	2727.32	3198.72	1786.85	4060.11	NA	NA	NA
11_GL0018497;1A-dyr4-07_GL0079687;5-4_GL0100790	36114.2	32971.6	34547.7	22565.5	22661.8	24946	21907.3	21147.8	19902.2	19167.8	19436.3	18899.5	21309.4	21829.3	19838.9			P27773	28716.1	28858.7	28778.3	28569.9	28112.6	28334.8	28244	28532.5	27071.6	26507.9	25468.5	24516	27265.1	26821.8	26282.6
11_GL0018497;1A-dyr4-07_GL0079687;5-4_GL0100790;7-5_GL0132685;S-Fe16_GL0001211	69919.3	61896.1	67022.7	73041.4	75464.8	75007.7	70568.1	80539.4	77434	85414.5	89642.7	82640.1	78793.4	74860.3	93375.8			P27784	NA	2313.61	3141.92	NA	NA	NA	NA	NA	NA	NA	NA	NA	NA	NA	NA
11_GL0018497;1A-dyr4-07_GL0079687;MC-6-2_GL0112990	44708.5	46885.9	45132.5	64206.9	60628	63042.1	70596.5	70909.5	64842.1	60431.7	70259.6	67979.1	64780	67468.9	64290.5			P28063	7717.39	8102.63	8649.79	8132	8078.72	7994.36	8662.09	8450.06	8469.74	10175.8	8441.41	8441.55	7320.34	6722.76	9183.11
11_GL0018497;5-4_GL0100790;MC-6-2_GL0112990	17870.5	22166.8	23480.9	31159.1	31345	31199.9	31753	33842	34844.6	33979.6	32318.2	34509.9	34570.4	36348.8	37901.4			P28076	9547.08	10018	10484.3	9878.06	10180	10772	9119.2	11062.4	9810.19	8255.82	7451.43	8760.46	7098.38	8285.99	9172.26
1-1_GL0020214;1-3_GL0011731;20_GL0090887;3-5_GL0053195;MH-6-2_GL0050618;S-Fe8_GL0232913	9589.61	9958.91	9670.33	10913	11166.1	11222.7	9144.22	9118.93	10072.4	11704	11381.9	12994.2	NA	NA	9624.47			P28271	3925.59	4444.73	3942.3	4738.6	4727.29	4971.22	5413.28	4279.98	4495.25	5270.63	3856.86	5655.46	NA	NA	NA
11_GL0020259;S-Fe3_GL0084351	12258.1	7484.1	7764.51	48812.2	48762.6	44016.1	51899.5	54556.6	52441.6	48062.6	51960.6	45233.7	51002.3	53353.7	56818.3			P28310;P50706;P50707;P50708;P50711;P50713;Q64016	791074	835095	849953	813474	711713	814271	NA	NA	NA	NA	NA	NA	NA	NA	NA
11_GL0020260	2371.4	2271.18	2909.61	3010.27	2975.02	2773.08	2884.85	2756.61	2298.13	NA	NA	NA	NA	NA	NA			P28474	8306.5	8247.35	7444.92	11213.6	9791.24	10298.6	12878.6	13004.9	11737.3	13449.3	12677.8	12412.6	15265.3	13677.5	14313.1
11_GL0020264	1820.65	NA	1227.66	NA	NA	NA	NA	NA	NA	NA	NA	NA	NA	NA	NA			P28665	10005.7	8241.2	9580.75	9017.21	8410.28	8503.06	8222.39	8504.72	9255.59	5769.13	6999.74	NA	7684.51	NA	6412.95
1-1_GL0020905	1207.01	1204.25	1640.09	NA	NA	NA	NA	NA	NA	NA	NA	NA	NA	NA	NA			P28825	75066.3	84497.6	70737.7	103532	93055.1	96936.2	107013	100608	97122.4	94576.4	89715.6	96321.2	88888.5	86625.6	84644
1-1_GL0020905;1-1_GL0048366;1-1_GL0048765;1-1_GL0092522;11_GL0041387;1A-dyr4-07_GL0009722;1A-dyr4-07_GL0092337;2-2_GL0114153;2-5_GL0007106;3-1_GL0086169;3-5_GL0005950;3-5_GL0037612;32_GL0111881;35_GL0124728;4-1_GL0072049;4-2_GL0086461;4-3_GL0023577;4-3_GL0063589;4-4_GL0083540;43_GL0029674;5-2_GL0024931;5-6_GL0012253;5-6_GL0015745;6-5_GL0008930;6-6_GL0089718;8-6_GL0099766;G1-1A_GL0021347;Group2-3A…	32136.4	30061.4	30639	32496.6	27826	30109.5	31234.7	29462.3	29131.8	9244.89	9675.2	6191.54	8618.08	10017.4	9371.84			P28843	191740	198763	200872	221033	223750	222152	213352	216670	214439	212409	213490	216650	220985	208484	215914
1-1_GL0020905;1-1_GL0048366;1A-dyr4-07_GL0092337;4-1_GL0072049;4-7_GL0028961;6-6_GL0089718;Group2-4A_GL0103032;Group2-8A_GL0153883	NA	NA	15595.9	NA	8952.72	6042.37	9347.8	NA	7231.8	NA	NA	NA	NA	NA	NA			P28867	1166.12	NA	1185.96	NA	1927.82	NA	NA	NA	NA	NA	NA	NA	NA	NA	NA
1-1_GL0020905;1-1_GL0048765;1-1_GL0092522;1-2_GL0125305;1-7_GL0120747;11_GL0041387;1A-dyr4-07_GL0009722;1A-dyr4-07_GL0092337;2-2_GL0111604;2-2_GL0114153;2-3_GL0002598;2-3_GL0015512;2-5_GL0007106;2-5_GL0023856;2-8_GL0005311;3-1_GL0086169;3-5_GL0005950;3-5_GL0070222;32_GL0111881;4-1_GL0007488;4-1_GL0072049;4-2_GL0086461;4-3_GL0063589;4-4_GL0083540;4-7_GL0028961;43_GL0029674;5-2_GL0024931;5-6_GL0015…	24188.9	19057.4	17070.7	18286.4	16383.7	12598.1	17342	15064.4	18680.6	5341.49	4051.78	2438.47	5813.61	NA	4844.91			P29391	46559.4	47877.9	45192	47137.2	44845	45923.2	50068.2	52797.1	50368.2	40849.9	45031.3	38704.5	38673.3	44747	44116.2
1-1_GL0020905;1-1_GL0048765;1-1_GL0092522;1-2_GL0125305;1-7_GL0120747;11_GL0041387;1A-dyr4-07_GL0009722;1A-dyr4-07_GL0092337;2-2_GL0111604;2-2_GL0114153;2-3_GL0015512;2-5_GL0007106;2-5_GL0023856;2-8_GL0005311;3-1_GL0086169;3-5_GL0005950;3-5_GL0070222;32_GL0111881;4-1_GL0007488;4-1_GL0072049;4-2_GL0086461;4-3_GL0063589;4-4_GL0083540;4-7_GL0028961;43_GL0029674;5-2_GL0024931;5-6_GL0015745;6-5_GL0008…	3241.25	3203.39	2435.29	NA	NA	NA	NA	NA	NA	NA	NA	NA	NA	NA	NA			P29416	6303.89	5690.26	6077.74	6331.07	5658.47	6031.63	15563.4	6050.32	5627.45	NA	8711.57	NA	8353.1	NA	NA
1-1_GL0020905;1-1_GL0048765;1-1_GL0092522;1-2_GL0125305;1-7_GL0120747;11_GL0041387;2-2_GL0111604;2-3_GL0002598;2-3_GL0015512;2-5_GL0007106;2-5_GL0023856;2-8_GL0005311;3-1_GL0086169;3-5_GL0070222;32_GL0111881;4-1_GL0007488;4-1_GL0072049;4-3_GL0063589;4-4_GL0083540;4-7_GL0028961;43_GL0029674;5-2_GL0024931;6-5_GL0072187;7-5_GL0167262;7-8_GL0106456;8-1_GL0074410;G1-1A_GL0021347;G1-5A_GL0009874;G1-5A_…	2392.89	2121.01	1655.86	1787.88	2238.38	1786.41	3143.56	2916.81	3008.45	2612.09	2377.83	2615.06	5933.4	5768.36	7620.35			P29452	892.14	1147.86	1336.17	1443.11	NA	NA	NA	NA	939.564	NA	NA	NA	NA	NA	NA
1-1_GL0020905;1-1_GL0048765;1-1_GL0092522;2-3_GL0002598;32_GL0111881;7-8_GL0106456;G1-1A_GL0021347;Group2-4A_GL0085401	19090.7	17504.3	16546.7	14753.8	11286.7	13047.1	13382.2	12810.4	13710.6	5131.79	6708.21	NA	NA	NA	NA			P29699	4623.13	4321.72	4654.73	5513.27	2823.23	5150.42	NA	3506.27	NA	NA	NA	NA	NA	NA	NA
1-1_GL0020905;1-1_GL0092522;2-2_GL0114153;2-3_GL0002598;3-1_GL0086169;32_GL0111881;4-7_GL0028961;7-8_GL0106456;G1-5A_GL0009874;G1-5A_GL0103365;Group2-4A_GL0085401	25199.5	26400.9	22483.5	NA	9930.12	11693.1	14767.1	16224.5	12684.5	NA	NA	NA	NA	NA	NA			P29758	16158	16387.9	15323.7	14820.5	14357.1	15252.6	14336.6	14341	13281	13278.4	14451.1	17939.1	12271.5	NA	10620.8
1-1_GL0020905;1-2_GL0125305;2-2_GL0111604;2-2_GL0114153;4-1_GL0007488;4-3_GL0063589;S-Fe6_GL0118707	67845.2	65745.5	64290	59271.6	61952.3	64079.6	62208.3	62444.5	64894.1	62632.4	62289.6	70360	67445.6	60215.2	60682.2			P30275	151080	139856	141986	134242	145727	130548	123169	121528	124816	102018	95930.8	86496.6	106571	84967.2	86428.4
1-1_GL0020905;1A-dyr4-07_GL0092337;2-2_GL0114153;6-3_GL0073361;6-5_GL0008930;Group2-3A_GL0181197;Group2-4A_GL0103032;Group2-8A_GL0153883	11886.7	11391.8	11371.2	11642.5	11861	10215	NA	NA	NA	NA	NA	NA	NA	NA	NA			P30416	3894.27	4172.71	4345.79	NA	2309.9	2040.26	3009.06	2764.43	NA	NA	NA	NA	NA	NA	NA
1-1_GL0020905;2-3_GL0015512;6-5_GL0008930;Group2-8A_GL0153883	216429	195736	205834	NA	NA	NA	NA	NA	NA	NA	NA	NA	NA	NA	NA			P30999	2422.45	NA	NA	2308.64	2206.2	2255.2	NA	2557.36	2343.21	NA	NA	NA	NA	NA	NA
11_GL0021566;4-8_GL0087691	14985.4	15239.7	14779.8	25058.9	22531.2	24299.1	24441.9	25412.9	25048.3	23407.7	22367.3	24041.9	24747.2	23499	25222.8			P31428	66478.5	55810	47420.6	167003	150636	150871	178016	179416	178342	247590	187562	197714	143984	198849	173601
11_GL0021641	16695.3	22997.9	14439.1	22101.2	23506.9	23696.4	24449.3	25025.1	25081.1	22535.9	22187	22316.3	21654.1	25441.8	22858.3			P31725	10917.5	10955.7	9799.77	7005.06	8373.59	7931.85	7803.94	8111.85	6435.41	NA	6814.91	NA	NA	NA	NA
11_GL0021641;7-4_GL0130722	1199.1	1453.48	1028.65	NA	990.529	NA	NA	1369.22	1126.97	NA	NA	NA	NA	NA	NA			P31809	173245	168512	183477	171170	165286	171184	171105	166322	165789	107098	99325.4	87704.1	85155.7	84945.5	88982.9
11_GL0021701	7961.78	7933.7	8661.39	5115.18	5193.77	4901.47	4969.18	4940.87	5146.52	NA	NA	NA	NA	NA	NA			P32261	15686	21781.2	17234.3	24213.8	21533.6	24628.3	24895.9	25395.9	26716.7	28756	27033.9	24061.6	36524.8	31835.8	29902.8
11_GL0021701;16_GL0103773;6-6_GL0043770;G1-1A_GL0049582;MC-0-1_GL0010773	NA	NA	NA	36522.2	38965.2	43130.3	33017.7	32956.6	28671.9	NA	NA	NA	NA	NA	NA			P32921	610.336	672.499	752.23	NA	NA	NA	NA	NA	NA	NA	NA	NA	NA	NA	NA
11_GL0021701;20_GL0040658;6-6_GL0043770	NA	NA	NA	9147.58	9790.58	9228.19	4417.58	7861.9	4979.68	NA	5142.75	NA	NA	NA	NA			P35230	1.54041e+06	721124	1.57835e+06	1.89459e+06	1.93417e+06	1.82458e+06	2.2223e+06	2.17172e+06	2.4209e+06	3.4023e+06	3.23628e+06	4.46138e+06	5.28563e+06	3.32161e+06	4.36497e+06
11_GL0021701;4-1_GL0023341;6-6_GL0043770;MH-6-4_GL0118888;MH-6-5_GL0010319	37130.8	36967.7	39021.5	51176.4	45200.4	44994.9	48074.3	47979	46618.8	41902.2	40127.3	35375.3	38306.9	32801.6	44423.9			P35276	1746.73	1359.09	1468	NA	1821.91	1903.2	NA	NA	NA	NA	NA	NA	NA	NA	NA
11_GL0021701;6-6_GL0043770	24157	24753.1	23169	24371.1	25028.3	24689	23532.1	24940	24845.9	17297.8	18362.4	17104.9	18272.8	15958.7	18851.1			P35276;P55258;P61028	5606.67	5653.79	6177.96	18965.9	NA	NA	NA	NA	21028.1	NA	NA	NA	NA	NA	NA
1-1_GL0022476	55866.9	55963.4	50723.7	61283.9	63375.9	56926.9	51386.3	52240.4	56344.1	28643.6	45225	43539.7	46265.8	43896.4	41950.2			P35278	6985.73	5387.09	7410.97	6861.96	6103.56	6728	6837.35	7096.15	6748.08	6219.74	NA	6896.29	NA	6019.57	NA
1-1_GL0022476;1-1_GL0080710	44378.2	38435.2	45544.1	36771.3	39469.9	38429	40105.7	34119.2	40083.3	37940.9	44628.8	37396.7	36415.6	29588	42944.7			P35279	NA	8873.77	13136.1	NA	13637.4	10973.8	17904.9	16412.6	12431.2	NA	16403.5	NA	NA	NA	18951.5
1-1_GL0022476;1-1_GL0080710;2-1_GL0115202;2-4_GL0063036;3-5_GL0058721	7442.15	7894.89	6977.92	NA	NA	NA	NA	NA	4931.88	NA	NA	NA	NA	NA	NA			P35293	1536.5	1372.91	1832.77	1910.4	NA	1538.89	NA	NA	2338.81	NA	NA	NA	NA	NA	NA
1-1_GL0022476;4-1_GL0012700	33578.1	30469.3	31814.7	38070.1	41695.1	36894.3	39311.8	42598.1	39356.1	44422.4	45921.3	43033.8	40776.8	41306.6	37506.9			P35441	7831.29	6995.23	6518.28	8070.25	7857.33	8020.18	10878.2	13072.8	8886.21	7482.23	8791.25	8464.65	10943.8	6944.5	10694.2
1-1_GL0022565;1-1_GL0141678;11_GL0054940;2-3_GL0050515;34_GL0041794;4-8_GL0109418;Group2-3A_GL0001191;S-Fe20_GL0185811	30418.4	15806.8	16868.7	63417.7	75247.6	73979.4	92654.2	89768.5	77623.2	67221.1	74848	73642.6	71567.7	63350.5	71444.7			P35459	NA	1082.66	1070.35	NA	NA	NA	NA	NA	NA	NA	NA	NA	NA	NA	NA
1-1_GL0022565;34_GL0041794	18021.6	20844.9	19375.2	16715.2	17272.4	16657.1	18102.3	17367	18232.4	12887.2	14949.2	14613.2	11653.5	9164.19	12132.4			P35486	3709.35	3264.64	3603.39	3963.23	2914.81	4047.11	3633.69	3989.98	2784.31	2834.16	NA	NA	NA	NA	NA
1-1_GL0022715	3889.59	4385.65	3985.72	4650.65	NA	NA	4675.24	NA	NA	NA	NA	NA	NA	NA	NA			P35564	2896.71	2851.98	2853.27	2987.92	2622.62	2834.56	2196.2	2498.44	2966.06	NA	NA	NA	NA	NA	NA
1-1_GL0022715;MC-0-3_GL0041542	16276.7	18755.9	16289.8	NA	NA	NA	NA	NA	NA	NA	16460.8	NA	20180.2	NA	NA			P35700	17097.6	17334.6	19453.7	24003.4	22812.7	24197.6	24303.9	25066.9	24188.6	27037.3	24450.7	24522	26836.3	25151.5	28043.7
11_GL0023226;3-5_GL0022718;6-6_GL0126785;8-8_GL0048439;G1-5A_GL0023352	23145.7	30301.2	26496.2	58939.2	60774.6	56637.6	56886.5	55322.7	62712.2	64741.9	72888.2	64051.3	62741.4	57265.2	72010			P35979	5235.83	5630.11	5538.29	4355.93	4410.81	4982.36	7173.3	5362.51	5743.33	5991.64	4652.95	5984.11	NA	NA	NA
11_GL0023226;6-6_GL0126785	19258.2	20283.3	20587.7	23600.8	22544.3	25283.3	23399	23474.3	22189.6	23582.3	28786.7	25865.6	25553.1	27850.6	27458.7			P35980	9494.43	8817.37	10346.6	9865.47	10217.5	9677.48	9907.71	9449.41	10275.9	9934.02	9161.53	9967.25	9044.7	8374.44	11532.6
1-1_GL0023432	NA	NA	NA	NA	15702.9	NA	NA	7046.24	NA	NA	NA	NA	NA	NA	NA			P36552	5404.56	5117.38	5362.25	6383.74	6342.23	6568.3	5222.46	5857.18	5516.71	5414.39	7442.93	5417.49	5070.93	6692.34	NA
1-1_GL0023432;2-1_GL0006988	192.863	179.181	284.716	387.48	NA	NA	NA	347.968	NA	NA	NA	NA	NA	NA	NA			P37040	16006.4	14668.7	12857.1	14778.9	13975.5	14746.2	12848.9	13986	13809.8	NA	13502.2	NA	NA	18452.9	NA
1-1_GL0023432;2-1_GL0006988;6-2_GL0031725;Group2-1A_GL0027790	80688.5	75122.8	74137.8	89010.4	91907.2	92562.4	93560.7	87010.9	88118.5	81029.6	88138.2	90652.7	81543.5	87339.1	81705.4			P38060	2273.65	2575.52	2516.89	2423.8	2096.8	2120.88	NA	2521.82	NA	NA	NA	NA	NA	NA	NA
1-1_GL0023432;6-2_GL0031725;Group2-1A_GL0027790	29203.8	30037.2	28116.1	26382.2	25639.2	27479.1	28132.6	24959.8	24013.7	23608.4	20072.4	19977.4	19872.1	22511.9	24489.8			P38647	13014.6	13478.7	12698	14176.8	14072.6	15089.4	13785.5	12936.3	12606.5	11772.3	12312.1	12124.1	11201.2	NA	10143.2
1-1_GL0024532	5704.23	6027.61	6207.33	5569.51	5406.63	6016.68	5356.75	5895.86	5252.45	5133.56	5213.2	4434.2	6336.27	5841.41	6242.42			P40124	15427.3	13115.6	12861.7	15361.7	14445.3	14465.3	13244.6	13210.6	13005.4	13761.5	14248	11389.5	13697.8	9796.89	15696.5
11_GL0024984	2620.26	3090.37	2748.57	NA	NA	NA	NA	NA	NA	NA	NA	NA	NA	NA	NA			P40142	34118.8	33805.4	34147.7	39838.1	39435.5	41172.9	45022.2	45014.8	47800.9	39392.9	45267.3	40462.3	40915.3	47659.3	41882.5
11_GL0024984;2-1_GL0102409	33042.7	34501.4	32764.2	40269.8	40450.3	39169.6	39840.7	37481.5	38419.8	48036.6	47722.7	53007.8	50884.8	48673	50081.4			P40237	34265.5	31173.1	34445.3	40124.7	35799.6	36749.8	29726.6	32287	35600	32383.3	29251.5	24908.1	22068.4	19886.5	31296.5
11_GL0024984;2-1_GL0102409;2-3_GL0002950;MH-6-4_GL0075386	30326.4	27624.1	30225.4	27540.3	26885.4	27897.3	32527.6	30716.2	32238	38316.7	36216.2	35506.5	42585.9	47044.2	39856.8			P40336	2824.26	2094.55	2669.35	1307.17	2826.94	2763.26	2360.03	2165.71	2708.99	NA	4030.19	NA	NA	NA	NA
11_GL0025380	62996.6	60895.8	47752.8	51709.7	45085.7	50230.8	48640.6	48769.4	49850.5	44498	47197.1	47310.4	50627.2	40405.7	45241.6			P41105	4262.02	4957.54	4704.82	4078.23	3484.65	3361.09	2802.44	5152.35	NA	NA	NA	NA	NA	NA	NA
11_GL0025380;S-Fe3_GL0160040	15088.1	16467.9	18030.2	25700.8	26395.7	29213.4	25905.1	22696.2	27713.4	23615.5	19991.7	26861.4	18839.7	18254.8	27450.5			P41317	3996.11	3935.63	3822.99	4496.53	4171.22	4190.39	4807.08	5209.04	6392.58	NA	NA	NA	NA	NA	NA
1-1_GL0025390	8532.62	10258.5	9299.95	6927.25	7314.59	6084.36	6685.06	5756.93	5308.78	NA	NA	NA	NA	NA	NA			P41731	12287.8	11710.6	12407.5	11814.7	10791.8	11194.2	11343.8	10709.5	9793.79	NA	NA	NA	NA	NA	NA
1-1_GL0025390;3-3_GL0067842;3-5_GL0064703;G1-6A_GL0095196;S-Fe9_GL0264014	20851.8	21654.5	21005.3	20303.2	17451.1	19551.4	18480.9	18513.2	16960.6	NA	12111.4	11337.5	NA	NA	13518.1			P42125	2164.61	2224.95	2278.01	2174.99	2225.88	2557.92	2337.48	2123.43	2642.13	NA	NA	NA	NA	NA	NA
1-1_GL0025390;3-5_GL0064703;S-Fe9_GL0264014	4238.26	3920.38	3776.28	4275.56	6393.03	6541.73	NA	NA	NA	NA	NA	NA	NA	NA	NA			P42669	3241.8	2867.86	3295.79	2155.43	2816.34	2413.55	3442.6	3223.2	4100.43	NA	NA	NA	NA	NA	NA
11_GL0025673	7237.21	6925.58	6516.42	9315.49	9751.44	9141.64	8139.07	8778.93	9292.31	9725.3	9682.23	9973.84	8704.05	10483.2	9236.68			P42932	3950.08	3670.94	3918.24	3510.15	3886.86	4310.06	3986.21	3826.52	4338.85	NA	NA	NA	NA	NA	NA
11_GL0025982	12721.8	12397.4	11154.8	12859.6	13560.9	12094.6	11506.2	11545.4	11501.6	9993.41	11605.6	6548.72	7846.62	NA	NA			P43137	24961.3	24084.4	24669.1	19131.3	18955.3	18157.8	18008.3	18445.2	16162.9	13907.8	10012.6	9918.75	NA	10205.8	13279.6
11_GL0025983	4140.58	4296.65	4927.54	2932.49	3542.89	2987.07	5820.84	5183.26	3029.9	NA	NA	NA	NA	NA	NA			P43274	6348.36	7036.47	7258.77	NA	NA	NA	NA	4855.07	6298.68	NA	NA	NA	NA	NA	NA
11_GL0025983;11_GL0048662;1A-dyr4-07_GL0110966;7-2_GL0009749;7-8_GL0139379;MC-0-3_GL0075365	18010.7	17108.6	18718.7	25946	21843.3	21326.8	30050.8	31455.3	30368.4	11113.1	8405.45	7784.13	NA	6992.15	7218.16			P43274;P43277	7182.81	11044.7	10242.6	22385.6	24567.9	20231.1	22074	24089.8	25391.6	22433	23777.9	NA	27406.7	30465.1	24894.3
11_GL0025983;11_GL0048662;2-1_GL0087205;2-1_GL0100511;2-1_GL0102392	49813	42944.6	48416.3	46576.3	50195	50552.4	30474.4	42749	40991.1	18327.2	23974.4	18553.2	17606.6	11788	18638.3			P43276	4031.57	3867.3	4534.46	4818.78	3431.83	NA	4304.66	NA	NA	NA	NA	NA	NA	NA	NA
11_GL0025983;17_GL0100210;1A-dyr4-07_GL0110966	8218.99	9247.78	9303.48	9305.55	11412.9	11110.4	10356.5	8993.78	10515.6	8423.79	7271.97	5713.42	NA	7708.97	6505.25			P43277	17063.1	16020.5	16174.6	15039.4	14946.8	15452.6	13071.2	15545	15462.6	15711.3	16677.3	16560.5	12478.5	17154.3	16810.9
1-1_GL0026484	3787.97	4136.96	3885.64	5321.84	6498.02	5556.39	NA	5589.54	NA	NA	NA	NA	NA	NA	NA			P45376	1987.64	1960.83	1906.39	1634.55	2146.26	2125.19	1683.31	2097.04	2071.42	NA	NA	NA	NA	NA	NA
11_GL0026527;20_GL0175919;G1-5A_GL0015696	3892.59	4315.89	3605.01	2636.54	2723.62	NA	NA	2385.52	2349.58	NA	NA	NA	NA	NA	NA			P45700	4942.34	5804.01	4509.33	7727.89	6150.9	6425.45	NA	6074.42	5970.63	NA	NA	NA	NA	NA	NA
1-1_GL0026529;1-1_GL0063097;2_GL0136110;4-6_GL0015699;4-7_GL0067539;5-1_GL0040177;5-4_GL0113635;G1-4A_GL0032122;MH-6-2_GL0119841	265471	314924	314045	251085	250586	239428	240008	223914	238333	191323	NA	188406	196274	193166	178447			P45952	38949.4	35530.5	38022.2	41997.2	43608.8	43853.6	42144.1	43444.9	43070.4	41894.2	39742.3	39970.5	37361.5	37041	39050
1-1_GL0026529;1-1_GL0063097;2_GL0136110;MH-6-2_GL0119841	17585.3	18152.8	16256.7	12414.2	12163.8	10966.4	10654.6	12127.5	13506.9	6567.29	9010.06	4396.23	6673.66	5381.78	6407.68			P46471	3110.84	2611.81	3080.54	2844.17	2640.21	2624.37	2883.94	2240.7	2088.36	NA	NA	NA	NA	NA	NA
1-1_GL0026529;1-1_GL0063097;2-1_GL0122637;2_GL0136110;4-1_GL0013931;5-1_GL0040177;5-4_GL0113635;G1-4A_GL0032122;G1-5A_GL0015335;MH-6-2_GL0119841	14641.6	8771.96	7944.6	43603.3	NA	NA	NA	NA	157969	NA	NA	NA	NA	NA	NA			P46638;P62492	12797.1	14467.7	12822.1	17738.3	18902.3	17105.5	18136.2	18593.7	17643.1	20028.9	18893.8	16525.3	18730.5	17397.3	17635.2
1-1_GL0026529;1-1_GL0063097;2-1_GL0122637;2_GL0136110;4-6_GL0015699;7-4_GL0056601;MH-6-2_GL0119841	NA	NA	2939.47	NA	NA	NA	NA	NA	NA	21995.8	NA	8588.83	NA	23779.7	41935.6			P46978	4238.36	3985.18	3987.9	3904.78	3781.09	3795.48	4606.48	3713.74	3255.01	NA	3569.71	NA	NA	NA	NA
1-1_GL0026529;2_GL0136110;4-6_GL0015699;5-8_GL0067825;8-2_GL0113497;G1-8A_GL0014960;MH-6-2_GL0119841	23453.4	23874.8	22348.8	21699.9	22148.5	21342	23021.6	21171.7	18930.4	17016.2	18871.4	16187.7	15301.3	19070.3	15174.8			P47738	43181.3	40358.3	40001.7	37399.2	37868.3	36877.6	39664.3	36580.1	36287.1	32402.1	27741.2	29582.4	28105.1	28245.7	30489.2
1-1_GL0026529;2_GL0136110;G1-4A_GL0032122;MH-6-2_GL0119841	55301.6	54669.8	53855.9	53537	51209.5	55464.5	51990.3	51688.4	53802.5	68233.6	72402.1	69170.1	62571.3	61154	60898.3			P47740	10363.3	10952.9	10984.3	11724.5	11170.7	12131.2	12258.5	12246.3	11994.2	11731	11706.6	11140.9	11443	9723.12	10653.4
1-1_GL0026529;2_GL0136110;MH-6-2_GL0119841	NA	5206.2	2502.01	11381.9	10858.8	10264.3	9462.23	8606.03	8527.44	NA	11967.7	17375.2	13951.6	15370.2	11713.8			P47753	3397.85	3738.17	3384.72	3405.61	2920.05	2737.82	2751.79	3059.86	3346.88	2351.48	NA	NA	NA	NA	NA
1-1_GL0026635	28790.1	23877.1	25335.3	31475.7	29849.6	28975.6	32161.9	32287.3	34021.4	35104	33986.3	29890.8	31779.3	31709	32398.2			P47754	2669.2	3068.5	2773.3	3035.76	2364.14	2717.51	2509.15	2221.08	2284.72	NA	NA	NA	NA	NA	NA
1-1_GL0026635;S-Fe20_GL0074192	29502.5	26671.9	25053.7	59219.8	56568.6	55593.9	61527.6	59810.3	61607.1	68859	62107.1	64922	70691.1	68187.5	65112			P47757	7241.73	5876.26	5510.54	5796.01	5477.58	5336.33	5492.27	5430.3	5175.37	4977.78	4985.29	5268.75	5591.39	4487.25	NA
1-1_GL0026806	4223.67	4005.7	4105.53	3770.97	3559.92	3122.51	4420.62	3996.37	3877.86	2433.53	NA	2518.15	NA	NA	NA			P47791	9769.5	9071.94	8339	11739.8	10625.8	12591.1	15349.9	15096.2	15764.2	14747.1	14570.3	14758.3	15623.2	13039.5	13659
1-1_GL0026921	10464.3	10613.4	10396.5	9607.35	8691.96	8821.36	11488.5	9117.5	9911.6	5537.4	NA	5452.42	NA	5256.47	7344.92			P47802	631.941	636.796	947.222	870.613	NA	758.867	NA	NA	NA	NA	NA	NA	NA	NA	NA
1-1_GL0026921;1-1_GL0125402;1A-dyr2-07_GL0026662;3-7_GL0022026;5-3_GL0043541;8-1_GL0116808;Group2-3A_GL0207018;Group2-8A_GL0080257	54046	48173.3	50189.6	36101.9	31993.5	27084.1	39214.9	37854.2	32777.8	14193.1	13905.2	10427	17283.5	10784.2	15849.7			P47856	12060.4	12141.3	12607.3	12314.9	12309.6	12529.5	11978.6	12843.1	12272.2	9872.98	7642.98	10181.1	7951.01	8651.02	9445.69
1-1_GL0026921;1-1_GL0125402;1A-dyr2-07_GL0026662;3-7_GL0022026;8-1_GL0116808;Group2-3A_GL0207018;Group2-8A_GL0080257	29300.5	8535.05	28072.7	25527.1	27487.8	25309.4	29711.1	28436.1	28163.1	22756.6	22620.5	22947.1	24791	21885.3	17723.1			P47911	3555.06	3307.32	5130.06	5560.77	5265.13	6208.66	6444.57	5796.03	6391.65	7723.7	7282.54	7570.19	7336.59	7592.64	8107.54
1-1_GL0026921;1-1_GL0125402;5-3_GL0043541	6453.86	6521.79	6308.42	4941.56	4711.68	4081.25	4233.94	4075.13	4178.74	2350.9	2168.06	2064.7	2036.85	NA	2439.35			P47962	5092.53	4695.77	5235.71	4780.99	5346.35	4645.06	4432.65	4406.42	4427.39	4109.24	3826.57	4761.56	4232.48	NA	4743.39
1-1_GL0027389	11629.4	10934.4	9675.72	9241.58	11364.7	8418.56	10227.2	11825.9	11021.6	NA	10928.1	11046.3	NA	NA	NA			P47963	8882.91	9034.16	9815.29	8198.62	7285.95	8187.91	7891.3	8911.17	8395.75	5745.62	7417.82	6634.72	7477.79	8355.81	NA
1-1_GL0027390	5212.55	6039.77	6051.79	5854.96	5971.96	5221.53	NA	4687.75	4436.66	NA	NA	5283.59	NA	NA	NA			P47968	NA	901.754	1050.29	NA	NA	NA	NA	NA	NA	NA	NA	NA	NA	NA	NA
1-1_GL0027394	40889	38059.1	38745.2	42061.9	38049.1	40020.3	44012	42696.5	41646.1	41246.4	37786	38793	37784.4	42702.8	33871.7			P48036	11650.1	12316	12145.6	13858.7	13213	13472.4	14238.3	13531.7	13543.5	13860.4	15248.1	14685.6	15281.9	13987.3	15607.5
1-1_GL0027394;3-3_GL0049024	10756.7	12536.9	12035.4	18482.3	15768.9	17325.4	16390.4	19438.1	20167.8	19583.7	16088.9	20094.4	16016.8	18961.9	14458			P48453;P63328	NA	2445.98	2279.54	NA	2095.95	NA	NA	1962.76	NA	NA	NA	NA	NA	NA	NA
1-1_GL0027791	14255	15183.5	14914	14538.3	15346.1	15018.8	14446.8	14358.7	13410.4	14441.5	16485.3	14400.6	14912.5	15077	12484.7			P48678	15990.7	15902	16443.5	16231.1	16461.5	16717.4	16495.5	16038.7	15091.5	15551	13618.8	14446.2	14357.4	14745.4	14643.5
1-1_GL0028152	7626.13	9556.88	9863.62	18924.7	19711.5	19872.3	19647.2	18298.9	19329.3	14324.7	17630.3	14400.3	13775.3	13821.3	15038.9			P48758	8278.74	7998.33	7235.39	12428.9	11071.4	10993.1	12278.1	10906	12500.5	11034.4	10994.2	9698.67	10196.9	NA	9291.16
11_GL0028376	NA	NA	NA	NA	10377.8	NA	NA	9050.26	12724.1	NA	NA	NA	NA	NA	NA			P48962	5411.57	5155.86	5114.91	4578.33	5719.19	4810.79	4715.65	4227.95	5237.68	4105.29	3664.88	3771.25	4454.18	3214.57	5575.28
11_GL0028376;2-3_GL0015512;3-5_GL0037612;5-7_GL0068497	NA	NA	NA	40853.4	35403	40711.3	41733	NA	NA	NA	NA	NA	NA	NA	NA			P48962;P51881	66662.4	51882.9	53138	94371.3	94726.5	93510.8	128250	129288	129503	90194.3	93928.7	96519.7	89988	94777.7	103377
11_GL0028428	4982.46	5920.17	6122.94	5891.96	5863.99	5803.19	5243.44	5364.62	5686.91	5143.93	4376.48	5578.04	4964.42	4000.8	4297.79			P49183	101871	79770.9	67838.7	136298	133798	130045	160010	157856	150930	134667	132043	133427	150222	145802	144516
11_GL0028428;11_GL0055314	9235.42	9761.88	8385.02	12103.3	12720.7	12727.2	15178.5	13475	13490.9	14312.6	11833.2	12642.9	12929.1	12714	13606.1			P49290	1667.2	1592.89	1396.5	1190.37	NA	NA	NA	1215.77	NA	NA	NA	NA	NA	NA	NA
11_GL0028479	9186.16	8661.26	9157.13	9036.17	7831.55	8691.27	8512.06	7550.12	8266.33	7814.4	6868.12	7785.48	6448.84	7260.69	7370.44			P49722	5299.11	5916.22	4524.1	4574.8	3802.94	2828.1	4678.31	4114.67	4380.89	NA	NA	NA	NA	NA	NA
11_GL0028479;11_GL0061743;11_GL0062569	3852.64	3682.13	4549.17	2987.6	2675.95	1452.06	NA	3000.42	NA	3225.67	NA	NA	2458.06	2365.27	2399.95			P49769	6437.42	6650.8	6444.46	NA	7878.12	8865.16	8026.07	9050.01	7503.27	NA	NA	NA	NA	NA	NA
11_GL0028482	10605.1	12323.8	11539	15075.9	13479.8	14887.8	14820.1	16416.3	16091.5	16678.4	15997.5	17517.4	15714.2	16628.9	17926.4			P49935	2760.46	3590.61	3066.27	3175.96	4375.17	4092.74	3370.93	3737.3	4217.65	NA	NA	3646.33	NA	NA	NA
11_GL0028482;1A-dyr4-07_GL0019666;2-2_GL0119514;2A-dyr14-06_GL0053546;2_GL0109744;5-6_GL0009184;5-7_GL0138952;8-1_GL0112958;8-4_GL0073668;G1-5A_GL0086325;G1-6A_GL0013373;S-Fe9_GL0241485	NA	2418	NA	126604	NA	NA	NA	NA	NA	NA	NA	NA	NA	NA	NA			P50247	16767.1	15977	16900.8	23930.9	22538.4	24332.3	23093.6	22989	23081.2	24259.2	23107.1	24475.1	25095.7	26291	28722.4
11_GL0028522	9726.18	9757.91	9675.92	10244.7	10343.1	10624.2	11047.5	10070.4	11836.5	7292.01	9230.62	10139	8708.35	10746.1	14130.7			P50396	1554.22	1825.56	1666.03	NA	2452.76	NA	NA	NA	NA	NA	NA	NA	NA	NA	NA
11_GL0028522;25_GL0015924	684.616	790.222	785.021	613.407	529.296	515.145	311.902	522.873	418.253	NA	179.73	NA	NA	NA	NA			P50396;Q61598	12603.8	16111.9	15401.5	15404.5	14018.9	16961.6	21899.5	13955.6	15665.3	20039	19172.9	18008.3	13796.7	NA	18572.5
11_GL0028522;2B-dyr23-07_GL0020466;6-3_GL0116019	11076	10321.8	11252.7	9391.75	10086.2	10242.9	10586.3	10413.4	9549.84	NA	NA	NA	NA	NA	NA			P50428	4473.94	4003.9	5560.08	NA	3553.14	3515.63	3796.24	NA	2971.23	3872.21	NA	NA	NA	NA	NA
11_GL0028561	3271.27	3546.56	3760.83	3278.8	3474.42	2913.76	3716.59	2808.69	3034.51	NA	3303.2	3733.77	NA	NA	NA			P50431	5304.69	5504.86	5632.52	6772.8	6068.71	5964.89	6821.76	8348.8	6900.8	NA	NA	NA	NA	NA	NA
1-1_GL0028661	NA	NA	NA	NA	7036.24	7942.39	8832.51	7399.71	7828.63	NA	8239.78	NA	NA	NA	NA			P50446	7708.29	8992.62	9431.99	3905.23	2875.78	3547.29	3287.73	NA	2738.68	NA	NA	NA	NA	NA	NA
1-1_GL0028661;20_GL0009554	3333.6	2811.96	3189.08	2189.46	1541.53	1665.67	2002	1694.05	2066.63	NA	NA	NA	NA	NA	NA			P50446;Q6IME9;Q922U2	NA	2746.11	NA	6724.25	6528.38	5970.71	6002.27	5987.17	6384.93	5232.11	7617.56	8513.47	18113.3	NA	NA
1-1_GL0028661;MC-0-1_GL0002410	4196.44	4195.96	3590.58	4036.84	4342.48	3569.2	3600.82	3113.16	4773.81	NA	NA	4375.1	NA	NA	NA			P50446;Q922U2;Q9Z331	29155.7	67596.1	68346.9	75461.4	65171	59550.2	83018.9	83738.4	75417.9	59196	67714.1	65024.7	72411.7	76630.8	70101.8
11_GL0028726	6069.14	6377.17	5819.9	5965.25	6922.6	6281.82	6141.87	6410.31	5465.89	6380.77	5560.83	5756.92	5916.87	4930.1	6628.23			P50446;Q9Z331	26953.8	28038	27450.1	28737.5	27615	26457.4	31200.3	31477.3	30230.8	33688.2	30260	32054.2	34179.7	34390.1	29577.1
11_GL0028726;Group2-4A_GL0001770	7277.56	7460.52	6068.5	9677.79	9948.69	9585.13	9809.61	11433.8	11955.4	8800.9	9449.37	5353.44	10790.2	10014.8	10017.2			P50516	2216.08	2016.08	2198.75	3683.11	2821.11	3220.34	5870.83	NA	NA	NA	8225.8	NA	NA	NA	NA
1-1_GL0029103	5571.33	5150.67	5870.1	5177.46	NA	NA	NA	NA	NA	NA	NA	NA	NA	NA	NA			P50544	5105.9	5631.81	5727.66	6438.07	5452.23	6268.96	7673.76	7037.98	5715.89	7837	7249.38	7595.82	7210.82	8106.5	6141.19
1-1_GL0029103;10_GL0011642;2-1_GL0025638;2-1_GL0032121;2-1_GL0118084;2-3_GL0037968;2-5_GL0004989;20_GL0168711;5-8_GL0142127;S-Fe10_GL0072623	15396.3	16916.4	16549.4	18615	18160.3	18382.4	17858.3	15964.1	13422.9	15165.9	14235.7	10244.3	15794.6	16640	18062.9			P50580	2594.99	3118.39	2848.48	2725.19	2432.09	2557.35	3151.47	2199.23	2662.94	NA	NA	NA	NA	NA	NA
1-1_GL0029103;2-1_GL0025638;2-1_GL0032121;2-1_GL0118084;2-3_GL0037968;2-5_GL0004989	3047.61	2980.03	2731.67	2151.98	2028.85	1805.54	1233.15	1063.59	NA	NA	1261	NA	NA	NA	NA			P51150	10340.8	10316.8	9202.86	11513.9	17380.2	11616.1	13545.9	12488.6	13138.8	9194.59	12439.1	NA	14003.4	NA	18516.4
1-1_GL0029103;2-3_GL0037968;2-5_GL0004989	1329.66	1157.84	1766.01	NA	1024.32	1264.23	1178.24	1501.66	1092.82	NA	NA	NA	NA	NA	NA			P51162	38551.4	43835.4	43853.2	33310.3	33664.7	34210.9	37509.2	36366	36038.9	27561.3	30518.7	34440	24067.2	29460.1	33114.6
1-1_GL0029103;2-3_GL0037968;2-5_GL0004989;5-8_GL0142127	4635.74	4852.96	4457.75	NA	NA	NA	NA	NA	NA	NA	NA	NA	NA	NA	NA			P51174	16292.6	17058.2	15931.9	14815.5	16889.5	15911.7	16955	15830.6	15640.8	19388	16983.7	19294.8	20646.9	19747.6	20475.9
1-1_GL0029125	12123.1	10339.7	12425.2	15005.2	15635.1	15226.4	15618.8	15482	14983.1	14259.3	14490.1	14778.2	15732.7	13614.8	12555.5			P51410	3056.43	3326.88	3083.31	NA	2135.08	NA	NA	NA	NA	NA	NA	NA	NA	NA	NA
1-1_GL0029125;2-1_GL0072698;2-2_GL0129609;4-3_GL0000037;MC-6-2_GL0032211;S-Fe9_GL0104873	12936.1	13644.8	12539.4	NA	NA	NA	NA	NA	NA	NA	NA	NA	NA	NA	NA			P51432	3368.14	3150.97	3495.45	3442.97	3902.22	3419.3	3569.89	3542.03	3439.97	4227.73	4528.52	NA	4781.81	NA	NA
1-1_GL0029135	85784.4	84319.8	82678.3	100609	95778.5	95722	91861.9	93510.4	91253.6	83401.6	86114.4	87163.8	87009.5	89661.1	98469.3			P51569	5156.97	6282.32	4385.25	4902.82	5430.2	5348.62	5883.85	7422.46	7101.05	NA	NA	NA	NA	NA	NA
1-1_GL0029135;1-1_GL0151489;2-1_GL0073987;2-2_GL0123342;2-3_GL0042236;2-3_GL0090842;23_GL0000047;28_GL0073235;3-1_GL0049920;4-1_GL0073237;4-7_GL0002310;5-1_GL0066416;5-4_GL0097816;5-7_GL0046612;7-2_GL0015190;7-5_GL0112810;S-Fe14_GL0055615	5059.35	4653.32	4558.78	92185.4	100846	99066.1	NA	137116	154737	NA	NA	NA	NA	NA	153885			P51658	NA	NA	NA	1426.25	NA	NA	NA	NA	1932.52	NA	NA	NA	NA	NA	NA
1-1_GL0029135;1-1_GL0151489;2-1_GL0073987;2-2_GL0123342;2-3_GL0042236;2-3_GL0090842;23_GL0000047;28_GL0073235;3-1_GL0049920;4-1_GL0073237;5-4_GL0097816;5-7_GL0046612;6-2_GL0084700;7-2_GL0015190;S-Fe14_GL0055615	78449	64041	61455.8	106691	109657	99706.5	110510	108488	125771	129156	132425	132318	134898	137279	143370			P51660	3506.82	3537.39	3789.07	2587.8	2676.56	2675.25	3002.08	2750.58	2826.14	1872.02	2704.8	2562.87	NA	3295.12	3152.47
1-1_GL0029135;1-1_GL0151489;2-1_GL0073987;2-2_GL0123342;2-3_GL0042236;2-3_GL0090842;23_GL0000047;28_GL0073235;3-1_GL0049920;4-1_GL0073237;5-4_GL0097816;6-2_GL0084700;7-2_GL0015190;S-Fe14_GL0055615	NA	106282	100966	130490	132233	132664	120107	125799	142399	150388	146554	140533	134577	155924	117152			P51661	5309.66	5282.18	5858.82	4988.58	4938.49	4450.5	4560.56	5160.97	4971.39	4909.74	5243.52	4283.22	5217.94	NA	4153.83
1-1_GL0029135;2-1_GL0073987;2-2_GL0123342;3-1_GL0049920;5-4_GL0097816;S-Fe14_GL0055615	36742.2	37407.3	38324	NA	NA	NA	NA	NA	NA	20551.1	18935.7	NA	9067.6	NA	NA			P51670	2316.65	2146.81	2545.82	3106.91	2163.95	2539.68	2086.25	NA	2843.04	NA	NA	NA	NA	2572.28	NA
1-1_GL0029135;2-3_GL0042236;3-1_GL0049920;4-1_GL0073237;5-4_GL0097816;6-2_GL0084700	55672.3	50748.2	53112.7	66951.9	64567.1	60390.6	59644.6	55474.5	59781.8	44338.2	33603.3	40318.2	39627.3	42554.2	46556.7			P51855	3533.22	3360.63	3200.09	3846.26	4386.9	3573.64	4459.77	3387.78	4184.76	NA	3646.42	4208.08	NA	NA	3822.29
1-1_GL0029135;28_GL0073235;5-1_GL0066416	23659.3	24377.2	21297.4	22427.1	23798.6	23208.4	25575.1	22702.7	25083.1	18615.4	18034.7	18082.5	17201.2	17525.3	15382.3			P51879	2357.78	3431.18	2524.91	2509.97	3268.48	2553.87	3537.7	2531.52	2385.43	NA	NA	3422.15	NA	NA	NA
1-1_GL0029135;28_GL0073235;S-Fe14_GL0055615	16743.3	15247.1	14556.6	20899.1	19531.5	23211.8	NA	NA	NA	NA	NA	NA	NA	NA	NA			P51881	33918.1	33197.7	49617.2	67646.1	69478.7	65349.3	68753.2	65912.6	69006.3	77913.6	95329.5	83213.1	94343	106314	77039.1
1-1_GL0029135;2A-dyr16-07_GL0034220;5-4_GL0097816;6-2_GL0084700;S-Fe14_GL0055615	27731	31668	29320.9	NA	NA	NA	NA	NA	NA	NA	NA	NA	NA	NA	NA			P52196	5787.71	4616.07	5733.52	6319.51	5843.99	6057.16	5607.09	6472.57	6082.32	4232.31	5984.75	5685.43	6272.82	5308.36	5488
1-1_GL0029153	10850	10202.1	10838.2	10941.6	10899	10040.1	11745.2	10657.4	10878.9	13732.5	13230.9	12223.9	12910.5	16497.8	14413.3			P52480	25153.9	24059.8	24270.3	25311.2	24704.1	24887.1	25357.1	25895.8	25085.3	23138.5	24927.5	24795.9	25432.4	22901.3	24706.9
11_GL0029950;11_GL0040983	26632.3	24804.4	24227.5	21283.1	23953.5	22274.6	7198.28	7672.42	4663.83	NA	NA	NA	NA	17661.2	NA			P52480;P53657	32629	33402	35074.8	42393.4	41053.8	41751.2	43116.1	40794.3	42358.5	41784.7	42146.3	39891.7	37768.8	40796.4	40118.3
1-1_GL0029988	14324.1	15781	15174.2	16669.9	16020.8	17157.4	17736.3	16403.5	16898.4	12226.5	14206.7	14552.8	13847.6	10789	12678.3			P52624	15735	14583.7	15597.8	16753.8	15511.3	15895.4	15301.9	17679.4	16595.1	16032.3	17510.5	17077.9	15942.5	16871.3	15080.9
1-1_GL0029988;7-1_GL0012015;S-Fe9_GL0171725	38396.9	34062.7	35557.7	44932	39893	39762.3	48478.6	45983	49391.2	50047.9	45517.4	45862.4	46764.1	47524.4	47690.3			P52787	4486.65	4497.68	4643.75	4161.67	4990.81	4393.44	4944.82	4900.51	5079.96	3856.44	4823.31	7083.88	NA	NA	NA
1-1_GL0029988;8-3_GL0022294;Group2-1A_GL0028415	NA	NA	NA	3654.43	2580.6	3896.88	NA	NA	NA	NA	NA	NA	NA	NA	NA			P52825	12549.9	11997.4	10544.2	8916.66	8618.11	8682.51	11701.6	9705.94	9249.44	NA	4049.32	NA	NA	NA	NA
1-1_GL0030056;14_GL0110599;1_GL0032517;2-1_GL0067568;2-1_GL0086392;5-2_GL0064278;G1-1A_GL0003105;S-Fe10_GL0023669	1992.95	2372.56	1968.36	1372.44	1446.39	897.864	1412.98	1592.25	1617.33	1861.07	1923.31	1198.69	NA	NA	NA			P53026	NA	NA	NA	NA	NA	NA	7171.99	6605.07	5812.94	7269.37	NA	6855.94	NA	NA	NA
1-1_GL0030443	4631.36	4402.37	4657.34	3787.79	4390.84	5647.03	4064.55	4286.66	4389.06	NA	3763.25	3798.53	NA	NA	NA			P53395	NA	1723.62	1460.09	NA	NA	NA	NA	NA	NA	NA	NA	NA	NA	NA	NA
1-1_GL0030443;11_GL0025982;3-7_GL0070473;4-7_GL0087480;Group2-1A_GL0028415;S-Fe9_GL0171725	18975.1	19149.9	19238.9	NA	NA	NA	NA	NA	NA	NA	NA	NA	NA	NA	NA			P53810	1296.21	1454.06	1257.96	2697.07	2654.85	3319.1	3400.9	3007.27	3400.42	NA	NA	NA	NA	NA	NA
1-1_GL0030443;1-1_GL0083995;11_GL0014135;11_GL0025982;1A-dyr2-07_GL0027016;1A-dyr4-07_GL0045601;1A-dyr4-07_GL0110967;2-1_GL0011849;2-1_GL0021623;2-1_GL0102394;20_GL0139296;3-7_GL0070473;34_GL0067531;4-7_GL0087480;6-1_GL0068351;6-6_GL0074506;8-1_GL0006910;8-3_GL0022294;G1-1A_GL0008874;Group2-1A_GL0028415;Group2-2A_GL0084879;Group2-8A_GL0077290;Group2-8A_GL0206293	205979	191430	190762	347448	263924	343120	NA	367693	388321	322680	360653	359801	387136	408835	397698			P53986	3639.94	3984.91	3961.61	4181.47	4078.11	4256.84	4666.91	4067.48	3958.96	NA	NA	4508.97	NA	NA	4977.06
1-1_GL0030443;1-1_GL0083995;2-1_GL0021623;2-1_GL0102394;2-3_GL0062049;34_GL0067531;6-2_GL0046991;7-1_GL0012015;Group2-8A_GL0077290;MH-6-4_GL0175735	13916.1	14810.9	14235.4	36571.1	34838.4	34909.4	45588.8	47317.1	49730.9	52177.4	51509.9	48982.3	49279.5	48741.6	51278.3			P53994	6990.98	7486.6	7755.93	7859.14	7683.38	7647.02	7532.29	6857.71	7084.67	8289.95	NA	NA	6723.12	NA	6834.67
1-1_GL0030443;2-1_GL0102394;34_GL0067531;6-2_GL0046991	13430.6	16599.3	14521.5	33400.2	33665.7	32682.1	32879.2	32495.6	33762.3	23709.1	28908	29156.5	29436.2	26087.7	27427.1			P54071	9814.23	11028.1	9681.69	7061.58	7891.77	7778.92	7248.23	6953.6	7052.93	8488.63	5733.38	6137.78	5449.25	7289.83	5589.83
1-1_GL0030452;1-1_GL0091757;1-1_GL0144870;1-4_GL0006688;4-1_GL0026029;6-1_GL0049235;7_GL0068824;MC-6-2_GL0038561	4346.44	7569.37	6228.14	7890.08	NA	NA	NA	NA	8174.16	NA	NA	NA	NA	NA	NA			P54116	20307.4	21012.5	20881.3	19960.1	18218.9	19249.1	19407.3	19832	19834.8	16855.9	17332.6	16815.5	16466.5	19632	17472.4
1-1_GL0030452;1-1_GL0144870;1-4_GL0006688	4399.21	4530.61	4955.6	5114.36	4047.06	3397.44	3791.02	4000.31	4178.66	2340.78	2183.13	NA	3988.02	NA	NA			P54818	2836.76	2666.93	2710.69	NA	3181.85	2945.28	1816.64	NA	NA	NA	NA	NA	NA	NA	NA
1-1_GL0030908	4640.36	5051.03	4764.46	5543.44	5439.12	6126.33	5494.43	5577.03	5074.21	4716.01	5862.86	5657.71	5669.79	4353.74	3779.44			P54869	19211.1	21377.1	19503	21048	21999.5	20314.4	20682.5	21261.6	20931.9	20185.4	17580.8	22345.8	21711.9	23123.4	23088.8
1-1_GL0030908;MC-0-1_GL0054819;MC-6-3_GL0095560;S-Fe15_GL0060535	NA	NA	NA	1831.88	1911.57	1949.69	NA	2256	1957.26	NA	NA	NA	NA	NA	NA			P55050	36837	33448.4	32979.2	34435.4	28558	27961.3	30483.3	23779.6	25688.9	22650.3	NA	25528.2	27178.8	NA	27363
1-1_GL0031225	49974.4	48115.1	42872	47577.8	41322.8	35014.4	48600.5	43359.2	45128.9	41380.4	40887.1	44025.8	43379.5	NA	48403.2			P55088	1339.58	NA	1752.17	1425.25	NA	NA	NA	NA	876.51	NA	NA	NA	NA	NA	NA
1-1_GL0031225;1-1_GL0046107;1-2_GL0113170;11_GL0010650;14_GL0024258;1A-dyr2-07_GL0046703;2-1_GL0003289;2-1_GL0039511;2-1_GL0071086;2-4_GL0102869;20_GL0090419;4-1_GL0012891;4-1_GL0019852;4-1_GL0082413;4-2_GL0102076;5-1_GL0023968;5-7_GL0067986;6-1_GL0082357;G1-5A_GL0020141;Group2-8A_GL0037214;MC-0-3_GL0086469;S-Fe12_GL0089833;S-Fe2_GL0121794;S-Fe2_GL0132020	NA	NA	NA	NA	12501.8	NA	156802	158218	174016	159023	150176	177355	161817	154437	156837			P55258	1611.24	1732.03	1487.6	1011.94	NA	NA	NA	NA	NA	NA	NA	NA	NA	NA	NA
1-1_GL0031225;1-1_GL0046107;1-2_GL0113170;11_GL0010650;14_GL0024258;2-1_GL0003289;20_GL0090419;4-1_GL0012891;4-1_GL0082413;47_GL0090201;5-7_GL0067986;6-1_GL0082357;MC-0-3_GL0086469;S-Fe12_GL0089833;S-Fe2_GL0121794;S-Fe2_GL0132020	37609.1	7485.73	55862.9	148441	148322	155401	161649	141680	193945	195797	157690	180716	212037	NA	NA			P55258;P61027;P61028;P62821;Q8K386;Q9D1G1	NA	918.867	NA	NA	NA	NA	NA	NA	NA	NA	NA	NA	NA	NA	NA
1-1_GL0031225;1-1_GL0046107;1-2_GL0113170;11_GL0010650;14_GL0024258;2-1_GL0003289;2-4_GL0102869;4-1_GL0019852;4-1_GL0082413;5-1_GL0023968;5-7_GL0067986;G1-5A_GL0020141;Group2-8A_GL0037214;MC-0-3_GL0086469;S-Fe12_GL0089833;S-Fe2_GL0121794;S-Fe2_GL0132020	27197.5	26093.2	25244.9	16359.3	12272.2	9812.29	23266.5	19919.8	19871.6	10564.9	9709.03	8271.97	16811.5	11420.5	12911			P55292	10413.8	10809.6	10811.4	10270.2	10175.2	9828.56	10102.3	9769.68	9160.21	8037.8	8842.15	8959.49	6018.61	7995.39	6899.52
1-1_GL0031225;1-1_GL0046107;1-2_GL0113170;11_GL0010650;14_GL0024258;4-1_GL0012891;5-7_GL0067986;S-Fe12_GL0089833;S-Fe2_GL0121794	7033.41	6625.17	5486.12	NA	NA	NA	NA	NA	NA	NA	NA	NA	NA	NA	NA			P56135	11920.9	11012.4	10731	12908.8	11356.4	12569.8	10983.5	11015.4	12683	10601	NA	NA	NA	NA	NA
1-1_GL0031225;1-1_GL0046107;1-2_GL0113170;11_GL0010650;2-1_GL0003289;2-1_GL0039511;4-1_GL0082413;5-7_GL0067986;6-1_GL0082357;G1-5A_GL0020141;MC-0-3_GL0086469;S-Fe12_GL0089833;S-Fe2_GL0121794	20721.1	34179.1	33710.1	39373.8	37753.1	37882.5	32995.6	38238.1	35741.6	35184.5	38842.3	39820.5	38015.3	37963.6	38399.5			P56382	10032	10297.1	10234	11310.4	11350.7	12501.7	12347	NA	15024.8	12769.1	14400.8	15551.2	14201	12184.7	12441.3
1-1_GL0031225;1-1_GL0046107;1-2_GL0113170;2-1_GL0003289;4-1_GL0082413;6-1_GL0082357;G1-5A_GL0020141;MC-0-3_GL0086469;S-Fe12_GL0089833	NA	NA	NA	15266.3	18289.4	18766.7	NA	15609.2	13001	38717.6	46534.1	45891	28219.7	33375.5	31838.9			P56389	6928.22	7574.35	7923.68	9415.83	11103.6	10805.5	6701.12	NA	17759.4	NA	NA	NA	NA	NA	NA
1-1_GL0031225;1-1_GL0046107;1A-dyr2-07_GL0046703;2-1_GL0071086;4-1_GL0019852;4-2_GL0102076;47_GL0090201;Group2-8A_GL0037214	8928.8	8283.53	8819.46	7612.53	6680.37	5960.48	6976.84	7793.46	8482.35	NA	NA	NA	3796.78	3972.63	4455.21			P56391	4052.02	3272.08	4096.13	4502.32	3727.25	3843.46	3275.72	3136.42	3213.82	NA	NA	NA	NA	NA	NA
1-1_GL0031225;1-1_GL0046107;4-1_GL0019852;Group2-8A_GL0037214	29738	28933.4	28497.1	28792.1	28696.2	28710.4	26675.7	25671	29742.3	29657.1	28421	25749.6	27651.3	27417.2	20209.2			P56395	4938.7	4602.71	5365.11	5408.89	5182.24	6147.14	5967.04	4849.88	5525.23	NA	NA	NA	NA	NA	NA
1-1_GL0031226	14869.4	11740.4	14279.8	13891	12268.4	12590	15808.8	16056.8	17008.7	14316.2	12984.1	14793.3	13818.3	18962.2	18785			P56480	82174.7	85550.5	87680.9	96133.3	98984.4	93121.2	88550.6	86485.2	92339	93658.2	88391.5	90339	83613.3	97332.2	92067.4
1-1_GL0031226;1-2_GL0062480;1-2_GL0113171;1A-dyr2-07_GL0068617;1A-dyr4-07_GL0106171;2-1_GL0009700;2-1_GL0024477;2-3_GL0019987;2-7_GL0037264;20_GL0075489;23_GL0100646;4-1_GL0012892;4-8_GL0033484;5-1_GL0003077;6-2_GL0022431;6-7_GL0119670;7-5_GL0130962;8-7_GL0038526;G1-3A_GL0068069;Group2-3A_GL0099690;MC-0-1_GL0054221;MH-6-4_GL0065481;S-Fe20_GL0010192;S-Fe5_GL0016695;S-Fe9_GL0013307	501535	391538	392424	539167	NA	NA	495205	434509	609920	478160	535247	475246	632909	637040	518887			P56528	3033.31	3003.41	3059.58	2532.27	2742.68	2727.66	3111.4	3277.05	3085.73	NA	2176.34	3080.33	NA	NA	NA
1-1_GL0031226;1-2_GL0113171;1A-dyr2-07_GL0068617;2-3_GL0019987;23_GL0100646;4-1_GL0012892;4-8_GL0033484;6-2_GL0022431;7-5_GL0130962;8-7_GL0038526;MC-0-1_GL0054221	11002.2	8832.38	8315.46	13184.3	12115.8	9839.52	11018.2	12278.3	12521.9	7916.16	7208.08	7308.19	9617.77	7050.01	9071.58			P56677	6872.33	7044.17	8006.69	10927.3	9429.16	9686.88	8354.25	8773.6	8558.39	7401.02	7921.58	6432.16	5333.27	4988.88	9818.65
1-1_GL0031226;1-2_GL0113171;2-1_GL0009700;2-1_GL0024477;2-3_GL0019987;23_GL0100646;4-8_GL0033484;5-1_GL0003077;6-2_GL0022431;8-7_GL0038526;MC-0-1_GL0054221	74211.3	72379.9	75183.6	52789.1	51788.8	42144.6	52884.6	51973.1	56886.6	19803.8	19182.8	14740.6	21461.3	20876.6	16685.8			P57016	443.125	368.528	532.793	NA	2037.39	1460.73	2266.2	2355.57	NA	NA	NA	NA	NA	NA	NA
1-1_GL0031226;1-2_GL0113171;2-1_GL0024477;23_GL0100646;4-8_GL0033484;5-1_GL0003077;6-2_GL0022431;MC-0-1_GL0054221	124716	123596	120880	188502	176606	195372	212768	209921	225202	215873	205315	178584	193809	191013	186920			P57096	10050.7	11844.9	8588.51	11635.5	11784	11274.6	11720.6	11912.1	11828.6	12434	10751.9	12142.3	14481.6	8152.82	12352.1
1-1_GL0031226;1-2_GL0113171;4-1_GL0012892;4-8_GL0033484;5-1_GL0003077;7-5_GL0130962;G1-3A_GL0068069	NA	27209.3	NA	NA	NA	30832.3	NA	24953	30793.3	29509.8	28971.8	22422.9	22542.5	26415.5	19247			P57716	27697.4	28350.6	26479.8	31769	31936	31833.2	34076.7	31852.8	35052	30694.5	28926.3	29034.3	30352.6	32968.8	31494.5
1-1_GL0031226;1A-dyr2-07_GL0068617	2664.33	3047.13	3126.75	3018.74	2549.97	1910.99	1440.66	1811.73	1623.92	NA	NA	NA	NA	NA	NA			P57759	1354.44	1338.29	1550.61	NA	NA	NA	NA	NA	NA	NA	NA	NA	NA	NA	NA
1-1_GL0031226;1A-dyr2-07_GL0068617;2-1_GL0009700;2-1_GL0024477;2-3_GL0019987;23_GL0100646;5-1_GL0003077;8-7_GL0038526	13412.9	14571.3	14930	NA	NA	NA	NA	NA	NA	NA	NA	NA	NA	NA	NA			P57780	9823.5	9561.33	10273.7	7763.26	8253.8	7863.21	8072.79	7315.16	7794.07	6506.91	6884.35	5939.83	6941.6	6141.19	6285.35
1-1_GL0031226;2-1_GL0009700;2-1_GL0024477;5-1_GL0003077	42435.7	20961.4	37304.6	NA	25074.9	30275.8	NA	NA	NA	NA	NA	NA	NA	NA	NA			P57780;Q7TPR4	5610.42	6471.47	5295.67	11604.1	11390	10981.9	12768.7	12351.5	11473.9	9336.66	9118.34	11441.6	11401.8	11077	10287.9
1-1_GL0031226;2-1_GL0024477	43720.9	41312.4	45641.7	48408.5	50502.1	60651	47247.3	44725.1	48236.8	44809.9	42793.7	39548.6	26915.7	31027.7	26572.9			P57780;Q7TPR4;Q9JI91	4499.39	4880.94	4842.35	4696.43	4636.76	5118.92	5044.55	5049.59	5359.46	6487.54	5790.08	4084.84	NA	NA	2888.7
1-1_GL0031226;23_GL0100646;6-2_GL0022431	NA	NA	NA	42202.2	37991.6	45929.6	28635.1	NA	NA	48654.8	46170.3	49464.7	50478.4	41473.9	53661.5			P58021	6732.88	7658.45	7408.82	5760.22	6052.79	5148.1	5664.18	5675.78	7089.17	NA	NA	NA	NA	NA	NA
1-1_GL0031226;5-1_GL0003077	NA	NA	18209.3	45254.1	48488.6	50675.4	42147.6	43431.4	39419.5	NA	NA	39355.4	NA	NA	NA			P58044	3771.58	3465.54	3862.61	3709.79	4337.35	3898.29	2855.1	2752.13	3506.91	NA	2768.49	4174.85	NA	6813.04	3372.03
1-1_GL0031226;5-1_GL0003077;6-2_GL0022431;6-7_GL0119670	32122.4	32568.1	30455.5	36872.8	38578.9	39681.8	37193.4	37899.3	38264.4	39107.4	41179.3	43437.1	NA	39496.9	42412.8			P58137	NA	1025.25	NA	844.777	1208.27	NA	NA	NA	NA	NA	NA	NA	NA	NA	NA
1-1_GL0031226;6-7_GL0119670	NA	NA	NA	NA	7112.46	NA	NA	NA	NA	NA	NA	NA	NA	5918.43	NA			P58242	80296.9	87778.2	79397.2	77636.9	76144.8	83713.8	74423.7	73656.7	76799.7	63050.8	68571.6	71380.5	68031.8	77595.1	59150.7
1-1_GL0031255;10_GL0065662;1A-dyr3-06_GL0012636;34_GL0023746;Group2-4A_GL0018635;MC-0-1_GL0020550;S-Fe10_GL0112851;S-Fe9_GL0179822	29087.9	26884.5	30442.6	33146.9	32012.9	37602.2	34859.3	31591.8	41694.6	NA	NA	NA	NA	NA	NA			P58252	13585.5	14251.1	14496	16382.9	15362.9	15679.5	16554.3	16490.7	17194.6	17470	17472.7	17040.5	15563.6	19085.9	17662.6
1-1_GL0031255;1-1_GL0141637;10_GL0065662;1A-dyr3-06_GL0012636;34_GL0023746;G1-1A_GL0026950;Group2-4A_GL0018635;MC-0-1_GL0020550;S-Fe10_GL0112851;S-Fe9_GL0179822	NA	14377.8	11284.6	NA	NA	NA	NA	NA	NA	NA	NA	NA	NA	NA	NA			P58771	2468.34	2609.17	1966.31	2360.72	2289.65	2620.67	3091.13	2522.35	2945.72	NA	NA	NA	NA	NA	NA
1-1_GL0031255;1-1_GL0141637;10_GL0065662;G1-1A_GL0026950;MC-0-1_GL0020550;S-Fe10_GL0112851	2436.43	2667.96	2652.4	5467.83	4780.12	5900.14	5656.7	5871.83	4073.89	5424.49	5628.27	5310.55	4453.23	NA	4304.05			P59108	4762.06	5869.03	4871.85	5418.05	5809.19	5616.58	5133.56	4917.94	4852.2	5771.45	5469.01	6551.34	NA	NA	NA
1-1_GL0031255;1A-dyr3-06_GL0012636;34_GL0023746;Group2-4A_GL0018635;S-Fe10_GL0112851;S-Fe9_GL0179822	41882.2	43905.4	43562	41940.3	41538.1	41532.1	43389.1	47975.9	47508.1	44360.5	44653	43765.4	41545.2	40713.4	43318.8			P59108;Q8BT60	5951.48	6184.46	5456.3	8335.59	6378.64	8616.63	6887.91	5868.45	6771.32	6219.28	3541.33	5258.23	4426.33	3720.46	4170.94
1-1_GL0031369	7905.86	8033.23	8275.64	6890.55	7366.35	7202.15	6739.91	7309.51	6699.01	5864.34	7260.33	8724.96	6801.74	7532.74	7984.43			P59999	7959.66	8069.92	7967.08	7066.42	6998.93	7867.85	6842.38	7498.65	7227.81	6459.44	6518.89	3293.12	6798.48	6971.7	9597.7
1-1_GL0031369;1A-dyr4-07_GL0112723;Group2-7A_GL0019026	34698	27535.8	30757.9	31050.4	29335.7	33203.7	36054.8	33682.2	32242.7	NA	NA	NA	NA	NA	NA			P60335	2072.46	1936.02	1906.05	NA	2280.88	NA	NA	NA	2187	NA	NA	NA	NA	NA	NA
1-1_GL0031369;1A-dyr4-07_GL0112723;Group2-7A_GL0019026;S-Fe8_GL0168562	17322.5	18782.7	17224.4	15912.2	15624.4	12777	16772.4	16469.7	15141	13986.9	15204.5	14723.4	18664	14436.1	14972			P60335;Q61990	2209.53	2252.49	2362.22	2360.9	2206.01	NA	1795.51	2000.54	2232.25	NA	NA	NA	NA	NA	NA
1-1_GL0031369;1A-dyr4-07_GL0112723;S-Fe8_GL0168562	4377.56	6036.37	5266.67	NA	NA	NA	NA	NA	7999.71	NA	NA	NA	NA	NA	NA			P60710	322674	290490	253294	352828	351341	317011	363892	356242	364785	342080	336117	327900	351227	354262	339707
1-1_GL0031369;Group2-7A_GL0019026	NA	2750.17	NA	NA	NA	2948.63	NA	NA	NA	NA	NA	NA	NA	NA	NA			P60710;Q8BFZ3	177403	153881	144862	150535	157576	155083	150642	163559	177460	191943	180223	194710	198664	199282	204172
1-1_GL0031369;S-Fe8_GL0168562	1724.78	1646.34	1906.49	NA	1449.92	NA	NA	NA	NA	NA	NA	NA	NA	NA	NA			P60766	10112.4	9749.31	8989.91	9748.64	10736.9	9023.67	9848.64	8194.57	9838.87	NA	NA	NA	NA	NA	11201.8
11_GL0031897	21913.8	20046.9	21996.5	18115.2	20198.8	16206.5	17701.2	23322.2	18985.5	10406.7	16800	7469.72	17132.3	14081.5	9868.3			P60766;P63001;P84096	8355.69	8209.9	8804.26	10865.2	11713.5	10046.7	12094.5	11202	12059.7	10876.3	10574.9	9550.55	11796.9	9877.17	8522.7
11_GL0031897;1A-dyr4-07_GL0106169;6-3_GL0036745	22765.3	19975.2	20543.2	20167.2	21330.6	18477.3	15990.2	14006.7	18156	18011.9	14084.4	15401.7	15261.6	11935.9	13621.3			P60843	5756.91	6076.06	5708.21	5970.31	6379.66	5397.68	6039.99	6992.31	6164.84	3233.7	3952.38	2830.11	3307.05	4170.31	3656.38
11_GL0031897;6-3_GL0036745	43717	48757.6	42651.5	50501.8	49833.3	46031.8	48248.5	49889.4	45994.6	49894.2	43261.9	39912.6	43807.2	37271.7	56529.7			P60867	2846.34	3158.06	2687.03	2789.44	3140.52	2375.47	NA	NA	6873.19	NA	NA	NA	NA	NA	NA
11_GL0031901	38964	36540.5	38159.4	38065.3	34783	33596.2	28445.5	36362.3	32232.1	34998.2	26665.5	26086.3	22078.7	24308.4	21167.6			P61022	2461.88	2553.98	2353.09	2678.52	3235.07	3260.2	3332.07	2610.49	2930.16	3670.44	NA	6250.13	NA	NA	NA
11_GL0031901;7-5_GL0152823	69793.1	63838.6	62119.7	39251.1	42436.4	38722.5	45008.3	44390.1	45065.2	44362.7	38148.8	37544.3	36471.9	48452.4	40216.2			P61027	1407.02	1742.02	1574.3	NA	NA	NA	NA	NA	NA	NA	NA	NA	NA	NA	NA
11_GL0032113	6343.93	7259.92	8478.53	8465.22	7468.47	7039.26	8194.56	7643.85	7535.09	NA	3360.67	NA	NA	NA	10598			P61089	2389.23	2280.02	2449.96	1759.22	NA	2517.15	1904.97	NA	NA	NA	NA	NA	NA	NA	NA
11_GL0032640	6226.46	6656.25	6733.02	6080.99	6309.82	6107.58	7105.25	7300.32	6595.5	NA	12060.6	9901.66	8926.64	12613.4	11082.4			P61161	5486.24	5506.16	5645.15	6274.94	6313.7	7218.31	6618.07	6827.91	5516.02	5427.49	NA	5500.63	NA	NA	5616.72
11_GL0032668;4-8_GL0022628;6-7_GL0054004	6051.72	5226.15	5947.43	5769.28	5344.76	5191.99	6033.86	5136.61	4185.7	3861.48	4006.23	4255.47	4312.6	4435.68	NA			P61164	1458.19	1201.49	1003.57	2514.92	NA	NA	NA	NA	NA	NA	NA	NA	NA	NA	NA
11_GL0033162	15100.4	14245.1	15055.6	14025.2	14299.8	14381.1	13719.3	13193.2	15054.3	10742.8	12424.4	10874.1	12176.5	11772	11552.7			P61205;P84078	18034.6	16927.4	16502.8	16659.6	17054	17029.7	17867	19110.5	18625.1	16149.5	13629.9	13218.8	14482.4	13927.6	16227.4
1-1_GL0033364	8477.57	8729.16	8769.7	8972.15	8117.19	8380.29	8154.82	7699.07	8889.26	8603.09	7903.5	7042.75	6938.28	8756.06	8901.74			P61255	9456.91	9331.91	9330.56	11168.1	11469.7	10446.1	12493.7	11623.7	11727.5	12345.7	12680.8	9961.24	12010.3	9794.09	14539.8
1-1_GL0033364;6-6_GL0053070;G1-1A_GL0017043	1531.57	1750.81	1401.62	2320.74	2026.01	1960.52	NA	1007.37	NA	NA	NA	NA	NA	NA	NA			P61327;Q9CQL1	1598.73	1903.42	1743.1	2724.86	2688.72	2455.13	NA	3585.06	3157.14	NA	NA	NA	NA	NA	NA
11_GL0033535;20_GL0128292	4030.94	4248.07	3684.01	2993	2736.46	2144.79	2156.07	3028.52	1864.45	NA	NA	NA	NA	NA	NA			P61358	5799.04	6578.8	6616.63	8800.71	6744.83	7481.25	7351.32	7573.08	7132.44	7335.71	6160.54	7128.42	NA	NA	7719.88
11_GL0033854	14292	14113.8	15123.6	12610.6	11916.9	12328.5	12585.8	13307.9	11998.9	6712.56	6826.77	6964.8	6593.04	4784.61	6191.51			P61514	2762.1	3400.68	2758.7	2748.36	2676.8	2877.58	2766.88	2628.79	2911.84	3492.82	NA	NA	NA	NA	4108.92
11_GL0033854;4-7_GL0055421;5-7_GL0002148	40815.7	36691.6	38251.7	NA	NA	NA	NA	NA	91993.6	NA	NA	NA	NA	NA	NA			P61620	NA	NA	NA	4671.28	4586.86	4230.46	5496.4	5391.49	5576.9	NA	NA	NA	3361.86	3501.32	NA
1-1_GL0034633;14_GL0137105;7-4_GL0117481;7-5_GL0150318;G1-3A_GL0097750;Group2-2A_GL0085143	90329.4	105088	60675.3	263383	265885	263974	250111	260653	243679	181984	177978	187801	186797	191006	137897			P61750	4902.12	4910.26	5281.92	7429.41	6754.06	6769.76	7122.23	7095.09	7365.02	8170.8	7916.12	8047.37	NA	NA	7694.1
1-1_GL0034633;7-4_GL0117481;7-5_GL0150318;G1-3A_GL0097750	2554.66	2040.27	2924.2	NA	2524.18	3215.55	NA	NA	NA	NA	NA	NA	NA	NA	NA			P61750;P84084	12846.5	15231.5	16021.2	11973	9865.52	11787.2	14576	16463.4	11361.2	NA	NA	NA	NA	NA	NA
11_GL0034650;11_GL0111616	3112.87	2997.37	3041.68	2505.53	2033.84	2786.83	1965.32	1878.86	1583.49	1803.81	1947.94	1925.32	NA	NA	NA			P61804	4524.07	5470.2	4953.94	8544.29	7281.97	7221.74	4798.74	5112.82	5358.85	NA	NA	5698.37	NA	NA	NA
1-1_GL0034657	NA	NA	NA	1015.02	NA	NA	NA	NA	NA	NA	NA	NA	NA	NA	NA			P61922	13156.3	12082.8	11928.3	13717.1	13151.9	13567.6	14104.5	12987.6	13558.2	14675.5	13292.1	12749.7	13640.8	15027.7	14720.9
1-1_GL0034657;MC-0-1_GL0074098;MH-6-1_GL0045244;MH-6-1_GL0118148;S-Fe20_GL0053310;S-Fe2_GL0210641;S-Fe8_GL0008502	NA	46879.9	42113.9	NA	NA	NA	NA	NA	NA	NA	NA	NA	NA	NA	NA			P61965	5634	5251.29	5613.01	6105.89	6153.27	4363.9	7896.67	7146.92	5742.32	4960.62	4717.32	6088.98	5464.46	6394.98	NA
1-1_GL0034657;MC-0-1_GL0074098;MH-6-1_GL0118148;S-Fe20_GL0053310;S-Fe8_GL0008502	1412.32	1379.98	1277.57	1461.2	1649.59	1477.06	NA	1660	NA	NA	NA	NA	NA	NA	NA			P61979	2619.32	2609.14	2465.73	2350.23	2746.25	2103.37	2631.34	2573.61	2348.96	1800.59	1255.96	1966.69	3771.82	NA	2353.1
1-1_GL0034889	4195.77	5075.72	4283.57	NA	NA	NA	NA	NA	NA	NA	NA	NA	NA	NA	NA			P61982	2612.15	2767.3	2771.13	1987.97	2201.38	2122.25	1785.9	2181.04	1519.15	NA	1990.06	NA	NA	NA	NA
1-1_GL0035152	3122.57	3003.55	3566.44	3712.25	3306.78	3405.57	2759.22	3479.96	2975.63	4237.43	4425.95	2976.24	1849.45	NA	NA			P61982;Q9CQV8	NA	NA	NA	2258.93	NA	NA	NA	3762.99	3606.4	NA	NA	NA	NA	NA	NA
1-1_GL0035152;2-1_GL0006992;2-1_GL0081025;2-8_GL0046229;5-3_GL0092959	39925.6	39211.2	37697.7	34157.4	36785.9	36492.2	38781.1	35243.6	38416.5	34668.8	35767.9	31835.4	NA	36672.8	37228.5			P62071	3493.94	5244.86	3230.45	5253.46	5630.94	4219.17	5988.05	6691.57	6007.72	8847.81	7393.6	NA	NA	NA	NA
1-1_GL0035152;2-1_GL0029304	5349.41	5402.42	5139.92	NA	NA	NA	6261.31	4949.08	5286.91	NA	NA	NA	NA	NA	NA			P62137	5204.1	5858.23	5460.57	5224.13	6670.59	6347.76	5665.44	4529.57	6118.37	NA	NA	NA	NA	NA	NA
1-1_GL0036243;1-1_GL0103334;10_GL0023724;1A-dyr1-07_GL0047372;2-1_GL0047729;2-1_GL0100791;34_GL0006378;4-1_GL0038667;4-8_GL0123903;5_GL0126821;7-1_GL0075240;7-2_GL0037805;G1-5A_GL0147092;S-Fe20_GL0155750	NA	NA	NA	119066	117470	129910	106458	112643	114961	137630	140103	143240	125191	129680	120007			P62137;P62141;P63087	4912.77	4325.78	5151.95	4409.53	4308.11	5123.62	3033.36	3571.87	3709.29	NA	NA	NA	NA	NA	NA
1-1_GL0036243;1-1_GL0103334;10_GL0023724;1A-dyr1-07_GL0047372;2-1_GL0047729;2-1_GL0100791;34_GL0006378;6-2_GL0062533;G1-5A_GL0147092	NA	6015.41	5698.4	9232.03	8355.74	10326.7	12050.7	9967.83	11294.4	12446.3	12021.1	10441.2	11499.5	12391.4	11425.8			P62141	11926.4	11766.4	10015	17766.1	17072.5	17114.4	15080.6	13955.8	17078.7	12312.1	12889.2	11854	10639	15023.7	11901.1
1-1_GL0036243;1A-dyr1-07_GL0047372;2-1_GL0047729;34_GL0006378;4-1_GL0038667	1062.9	1313.48	1059.45	NA	1418.56	NA	993.354	NA	NA	NA	NA	NA	NA	NA	NA			P62196	4445.36	4948.8	4219.47	NA	NA	NA	NA	NA	NA	NA	NA	NA	NA	NA	NA
1-1_GL0036247	16117.1	17443.5	16821.2	13650.4	14405.2	14662.9	14640.9	14522.7	13600	12019.8	11828.2	12715.4	13591.9	12870.5	15050.3			P62242	6590.37	7078.66	5926.65	7580.62	8067.55	6966.85	9336.22	8557.12	9567.75	9790.71	NA	NA	7181.39	NA	12554.2
1-1_GL0036247;7-1_GL0048475;MC-6-1_GL0084390	39198.4	34663.4	36909.9	33206.4	31099.6	35984.9	35578.7	37191.3	37906.9	30138.4	33914.3	31029.8	25433.2	25487.2	30282.8			P62245	3618.76	3441.99	3865.11	3242.45	3296.67	3121.12	2225.19	2810.42	3045.24	NA	NA	NA	NA	NA	NA
1-1_GL0036481;17_GL0130449	8719.51	8740.74	8316.9	NA	NA	NA	NA	NA	NA	NA	NA	NA	NA	NA	NA			P62259	23912.8	21329.8	20533.8	33168.1	31958.9	32233.1	28469.7	29392	32259.4	36053.5	36486.8	37721.2	33610.3	33690.2	33748.8
1-1_GL0036481;17_GL0130449;MH-6-3_GL0025839;MH-6-3_GL0061014	NA	NA	NA	15229	16130.1	NA	NA	14744.5	15255.7	NA	NA	NA	NA	NA	NA			P62264	8599.64	9392.06	8792.42	NA	4673.91	NA	5748.79	5775.63	4247.27	8884.07	8321.03	NA	9850.09	10344.5	NA
11_GL0037479;S-Fe7_GL0276527	32562.3	33145.1	31813.3	34380.6	35017.9	32813.9	34947.5	34491	35971.4	28603.9	28836.7	30954.6	29659.3	30982.5	27206			P62267	3550.91	3609.32	3949.68	NA	NA	NA	NA	NA	NA	NA	NA	NA	NA	NA	NA
1-1_GL0037621;3-3_GL0073627;7-5_GL0007445;8-5_GL0087398;MH-6-5_GL0108824;S-Fe20_GL0046866	5232.9	4859.47	4374.01	5805.55	4488.05	5414.73	5743.56	4338.7	3907.3	NA	NA	NA	NA	NA	NA			P62270	11994.8	12126.9	11046.3	14779	13936.4	15380.5	14103.4	15052	15255.7	11520.5	12025.6	12719.6	14287.8	10275.5	15890.3
1-1_GL0037958	2216.25	2078.44	NA	2502.8	2611.34	NA	5380.22	4392.63	NA	NA	NA	NA	NA	NA	NA			P62274	3985.21	NA	2876.63	4023.68	4692.95	3993.31	4407.53	3381.37	5251.03	NA	NA	NA	NA	NA	NA
1-1_GL0037958;1-1_GL0054161;1-1_GL0073107;1-2_GL0095419;1-2_GL0115428;1-7_GL0113738;11_GL0021701;11_GL0139318;1A-dyr4-07_GL0090469;2-1_GL0112186;2-3_GL0105804;2A-dyr16-07_GL0057446;38_GL0043757;4-1_GL0011555;4-1_GL0013487;4-1_GL0023341;4-1_GL0057479;4-2_GL0077478;4-8_GL0028110;46_GL0035035;5-8_GL0048195;50_GL0015409;6-2_GL0055252;6-6_GL0043770;8_GL0053219;Group2-1A_GL0059452;Group2-3A_GL0036528;G…	8506.9	5661.65	2479.45	NA	NA	NA	NA	NA	NA	NA	NA	NA	NA	NA	NA			P62281	4631.13	6034.94	5424.74	4861.81	5973.64	4085.76	4590.27	6422.25	5261.6	4402.37	4822.95	NA	NA	NA	NA
1-1_GL0037958;16_GL0103773;23_GL0097013;G1-1A_GL0049582;MC-0-1_GL0010773;MC-0-1_GL0078736;MH-6-1_GL0004420;S-Fe10_GL0038852;S-Fe10_GL0095140;S-Fe2_GL0120413	31004.3	37084.7	31978.9	71230.4	65772.2	70430.4	72947.4	71973.9	75950.5	80165.8	76466.6	83663.1	86103.9	84665.5	91171.2			P62301	2836.27	2845.95	2632.82	5299.55	8469.14	6402.58	NA	5707.94	NA	NA	NA	NA	NA	NA	NA
1-1_GL0037958;MC-0-1_GL0078736	5706.36	5562.45	5210.1	4818.06	5757.87	5504.01	5272.41	5214.68	6076.48	5448.36	6235.38	5217.82	4006.74	3864.33	5439			P62307	2086.55	1360.79	2483.64	1713.02	2084.34	1769.64	1663.49	1926.18	1889.94	NA	NA	NA	NA	NA	NA
1-1_GL0037958;MC-0-1_GL0078736;S-Fe10_GL0095140	11908.9	11600.2	11054.5	15079.4	16215.9	15667.7	15601.2	14058.4	13564	12024.1	14302.2	14010.1	14562	16848.1	11850.7			P62309	2404.28	2171.35	2427.74	1885.6	2502.79	NA	3612.47	3004.23	NA	NA	NA	NA	NA	NA	NA
1-1_GL0038122;11_GL0031471;MH-0-4_GL0007045;S-Fe10_GL0069592;S-Fe3_GL0151416	7393.55	8449.34	8368.36	7349	8341.82	9071.66	8199.4	7124.78	7282.11	4577.79	5020	6453.58	NA	5842.73	NA			P62311	874.719	783.624	944.308	829.338	1565.93	1175.92	1870.43	1161.98	1166.75	NA	1899.25	NA	NA	NA	NA
1-1_GL0038124	11774.2	12188.8	11195.8	14266	13497.2	12143.3	12510.8	11803.4	11719.5	11441.1	12256.9	13488.7	11562.3	11711.8	12402			P62313	NA	NA	NA	5282.87	4712.57	4538.64	6608.85	6764.56	6382.37	NA	NA	NA	NA	NA	NA
1-1_GL0038124;23_GL0083604;MC-0-1_GL0025932;S-Fe10_GL0069594	NA	NA	NA	26649.6	29901.6	24105.9	30382.2	36515.3	37381.1	NA	NA	NA	NA	NA	NA			P62315	2319.14	1556.91	1414.3	NA	NA	NA	NA	NA	NA	NA	NA	NA	NA	NA	NA
1-1_GL0038124;MC-0-1_GL0025932	19356.1	17960.1	18109.9	23135.1	23068.5	22624.6	21116.5	21085.6	21566.7	18787.7	19721.6	20454.6	22972.5	20985.1	20931.9			P62317	4431.6	4783.34	4654.97	4018.74	5009.85	3787.75	3827.38	4217.49	4543.75	4301.94	NA	5283.97	NA	4623.97	NA
1-1_GL0038124;MC-0-1_GL0025932;S-Fe10_GL0069594	28024.7	28907.3	25894.5	32414.4	35504.7	30652.2	34481.7	36703.2	34705.6	36140.9	35046.4	36029.8	35230.8	33111.2	39675.3			P62320	7123.7	7514.88	6803.85	6894.16	6559.46	6500.84	7031.72	8281.66	8214.22	5686.95	5107.63	6563.32	4871.41	5558.34	NA
11_GL0038728;11_GL0131219	63287.6	67463.8	77297.1	122964	NA	NA	128162	131245	128617	123150	120622	126512	120373	128405	123122			P62331	5671	6262.23	6206.62	5433.69	6177.04	7073.99	5270.15	5136.52	5099.69	4936.97	5828.42	4354.22	6509.76	7000.24	6330.36
11_GL0038974;11_GL0114595;5-4_GL0123428;6-2_GL0072779	4294.93	6207.2	6298.83	4997.05	5383.33	3918.02	6393.19	4400.97	4178.39	NA	NA	NA	NA	NA	NA			P62702	2382.47	2212.76	2021.62	1367.54	1451.82	1103.93	1942.45	1837.3	1617.59	2247.43	NA	NA	NA	NA	NA
1-1_GL0039105	3176.39	3027.14	2898.65	NA	NA	NA	NA	NA	NA	NA	NA	NA	NA	NA	NA			P62717	4925.57	4704.08	3922.56	19300.9	16799.9	6739.3	2279.57	4082.12	2860.96	NA	3058.88	NA	NA	NA	NA
1-1_GL0039105;16_GL0089899;28_GL0032797;MC-0-1_GL0088483;MH-0-5_GL0025077;S-Fe10_GL0165136;S-Fe12_GL0018251;S-Fe12_GL0191779	24574.9	28379.1	26744.6	24929.5	25611.9	25819.6	23486.4	25138	25724.5	NA	NA	NA	NA	NA	NA			P62737;P63268;P68033;P68134	22985.6	27319.7	22653.3	105276	107356	115820	97714.2	100380	100978	112643	101105	118106	109597	114530	102663
1-1_GL0039105;28_GL0032797;MC-0-1_GL0088483;MC-0-3_GL0016791;S-Fe10_GL0165136;S-Fe12_GL0018251;S-Fe12_GL0191779	30024.1	28460.9	31968.7	58832.2	78164	64209.7	50692.8	48832.2	47809.9	84328.2	76119.3	79432.3	90743.1	83541.4	87943.3			P62746	3321.89	3396.41	3726.87	4424.3	4398.56	4295.41	4110.77	5513.01	NA	NA	NA	NA	NA	NA	NA
1-1_GL0039105;MC-0-1_GL0088483;S-Fe12_GL0191779	1261.56	977.085	1126.65	3863.92	4084.27	3947.79	NA	3659.65	NA	NA	NA	NA	NA	NA	NA			P62746;Q62159;Q9QUI0	835.735	629.843	738.728	742.204	937.114	394.108	1093.14	1510.58	826.492	NA	NA	NA	NA	NA	NA
1-1_GL0039242	8974.06	9962.42	8206.78	10426.7	10047.3	9578.69	9368.64	8886.68	9394.43	9055.25	8670.5	9528.4	9202.27	7635.33	9159.94			P62748	2741.79	2305.76	2300.19	3102.74	2048.22	2610.39	2392.06	2719.83	2377.42	2948.21	NA	NA	NA	NA	NA
1-1_GL0039242;1-1_GL0064871	7679.77	9521.13	9042.72	7707.21	6992.15	7718.44	6124.35	7617.35	6333.36	7430.49	6389.59	6574.74	NA	7460.25	6269.33			P62751	35332.1	28006.2	28749.8	48645.1	47679.8	42123.6	46672.1	46704.9	50588	45098.8	44301.6	55371.7	60693.1	58677	80823.6
1-1_GL0039242;MH-6-3_GL0024150	13389.6	12565.2	13202.9	19876.4	18087.2	18918.2	19298.4	21009.8	19167.6	17883.8	18122.6	18547.3	19702	15620.7	15607.7			P62754	4392.93	2578.52	2439.17	4735.29	4211.39	4350.23	4648.5	3751.22	4045.45	6037.78	5374.5	NA	4056.81	NA	NA
1-1_GL0039689	1211.14	1329.71	1247.24	1164.36	1100.3	1073.87	1304.71	1170.36	1438.88	1783.21	1476.97	NA	NA	NA	NA			P62806	455812	456298	474049	545256	521537	521274	487161	489734	511649	483640	454133	454975	449858	468026	398998
1-1_GL0039698	6762.44	6702.96	6289.87	5601.48	5360.19	5070.73	6321.52	5573.54	6523.84	7087.82	3813.53	4323.2	NA	NA	NA			P62814	2264.63	2046.98	2262.5	NA	NA	NA	NA	NA	1219.28	NA	NA	NA	NA	NA	NA
1-1_GL0039822	6848.29	7434.29	7619.98	6420.41	5965.23	5270.43	8711.68	6756.85	6264.19	NA	NA	NA	NA	NA	NA			P62821	3944.82	4686.92	4497.77	4389.78	4387.92	3730	NA	4332.16	3474.99	NA	2137.98	NA	NA	NA	NA
1-1_GL0039822;MH-6-5_GL0079858;MH-6-5_GL0091986	11358.5	12572.6	12145.2	10770.9	10181.8	10493.9	9226.64	11003.8	12470.3	14894.7	15102.2	15784.3	16938.7	12317.4	15438.7			P62821;Q9D1G1	NA	17148.7	NA	20791.9	25705.2	20056.6	NA	NA	NA	NA	NA	NA	14764.2	NA	NA
1-1_GL0039894	21028.4	23358.6	22452	22634.1	22832.8	21409	20310.5	19686.1	19747.9	13235.8	13232.1	13227.7	15177.8	12998.4	12424.2			P62827	10285	11598.8	10759.9	15285.7	14088.7	13028.5	15602	14368.8	15436.9	15042.9	15027.1	15993.4	NA	NA	13117.8
1-1_GL0039894;5-8_GL0086175	12765.1	12854.8	37155.2	30167	28706.4	27039.5	37289	35053.3	34411.7	29625.6	31690.7	27977	26252.6	22862.8	52650.7			P62827;Q61820	6108.94	6597.23	6184.93	7153.44	8353.9	7897.54	NA	8723.71	7260.41	NA	NA	NA	NA	NA	NA
1-1_GL0039894;5-8_GL0086175;MH-6-5_GL0136822	96570.5	97822.2	97017.8	107664	107655	106559	107254	105718	108096	106746	105772	104703	107919	100263	104243			P62830	2202.77	2637.73	2783.14	2268.8	2364.24	2129.67	3244.65	2364.31	2227.49	NA	7753.06	NA	NA	NA	4298.75
1-1_GL0039894;MH-6-5_GL0136822	12031.6	12584.3	11090.5	NA	NA	NA	NA	NA	11431.7	NA	NA	NA	NA	NA	NA			P62835	814.361	1002.54	813.496	NA	NA	NA	NA	NA	NA	NA	NA	NA	NA	NA	NA
1-1_GL0040368	13661.3	12499.3	12510.4	NA	NA	10009	NA	13342.4	NA	NA	NA	NA	NA	NA	NA			P62835;Q99JI6	14972.8	12740	14136.7	16898	14923.7	17235.3	17032.4	15805.7	16004.1	14523.9	12469.2	14937.1	NA	12621.7	16156.8
1-1_GL0040368;1-1_GL0097533;1-1_GL0138491;1-2_GL0056317;1-2_GL0106369;10_GL0025698;2-1_GL0068363;2-2_GL0154178;2-3_GL0004587;2-3_GL0071040;2-4_GL0007561;3-1_GL0054518;4-1_GL0033909;4-1_GL0068204;4-2_GL0043523;5-5_GL0053324;5-8_GL0063331;5-8_GL0102626;54_GL0082039;6-2_GL0076314;7-1_GL0047885;8-3_GL0010235;G1-1A_GL0023674;G1-5A_GL0104085;G1-5A_GL0142275;MC-6-1_GL0049413;MC-6-2_GL0178191	NA	NA	393271	486624	498696	494635	494520	491466	489721	527568	478873	462398	454957	481154	434039			P62843	2168.25	1668.41	1978.41	2755.08	2060.01	2524.03	2760.9	3481.69	2704.26	NA	NA	NA	NA	NA	NA
1-1_GL0040368;1-1_GL0097533;1-1_GL0138491;1-2_GL0056317;1-2_GL0106369;10_GL0025698;2-1_GL0068363;2-2_GL0154178;2-3_GL0004587;2-3_GL0071040;2-4_GL0007561;3-1_GL0054518;4-1_GL0033909;4-1_GL0068204;4-2_GL0043523;5-5_GL0053324;5-8_GL0063331;5-8_GL0102626;54_GL0082039;6-6_GL0084393;7-1_GL0047885;7_GL0094385;8-3_GL0010235;G1-1A_GL0023674;G1-5A_GL0104085;MC-6-1_GL0049413;MC-6-2_GL0178191	25065.2	26859.4	21446.5	NA	NA	NA	NA	NA	NA	NA	NA	NA	NA	NA	NA			P62849	1857.59	1797.1	2178.64	1059.39	1282.97	919.11	834.88	1154.32	870.187	NA	NA	NA	NA	NA	NA
1-1_GL0040368;1-1_GL0097533;1-1_GL0138491;1-2_GL0056317;1-2_GL0106369;10_GL0025698;2-1_GL0068363;2-2_GL0154178;2-3_GL0004587;2-3_GL0071040;2-4_GL0007561;3-1_GL0054518;4-1_GL0033909;4-1_GL0068204;4-2_GL0043523;5-5_GL0053324;5-8_GL0063331;5-8_GL0102626;54_GL0082039;7-1_GL0047885;7_GL0094385;8-3_GL0010235;G1-1A_GL0023674;G1-5A_GL0104085;MC-6-1_GL0049413;MC-6-2_GL0178191	114705	131581	121286	130990	173922	139938	100999	106028	126205	131113	140892	116029	94317.2	107566	105510			P62852	12690.7	12279.4	12743.7	10968.3	14301	13213.8	13057.3	12909	13552.9	NA	14887.3	NA	NA	NA	NA
1-1_GL0040368;1-1_GL0097533;1-1_GL0138491;1-2_GL0056317;1-2_GL0106369;10_GL0025698;2-1_GL0068363;2-2_GL0154178;2-3_GL0004587;2-3_GL0071040;2-4_GL0007561;3-1_GL0054518;4-1_GL0033909;4-1_GL0068204;4-2_GL0043523;5-8_GL0102626;54_GL0082039;7-1_GL0047885;8-3_GL0010235;G1-1A_GL0023674;G1-5A_GL0104085;MC-6-1_GL0049413;MC-6-2_GL0178191	2270.94	839.696	1424.24	NA	NA	NA	NA	820.611	NA	NA	NA	NA	NA	NA	NA			P62858	5748.49	5820.78	5605.47	6452.32	6759.41	7000.6	6874.25	6597.11	7731.85	7465.55	8158.21	9427.4	7930.78	6924.75	6908.67
1-1_GL0040368;1-1_GL0097533;1-1_GL0138491;1-2_GL0056317;1-2_GL0106369;10_GL0025698;2-1_GL0068363;2-2_GL0154178;2-3_GL0004587;2-3_GL0071040;2-4_GL0007561;3-1_GL0054518;4-1_GL0033909;4-2_GL0043523;5-8_GL0102626;54_GL0082039;8-3_GL0010235;G1-1A_GL0023674;G1-5A_GL0104085;Group2-8A_GL0017053;MC-6-1_GL0049413;MC-6-2_GL0178191	12477.1	14066.6	13913.2	13966.8	16741.9	14077.6	14492.3	14258.8	15854.9	9655.1	12971.1	9893.96	11723.4	10374.6	9663.04			P62874;P62880	33038.2	29996.4	29986.9	44582.6	39180	38638.6	37921.6	39435.6	39840.9	29988.6	29861.9	39644.8	31248.3	33649.1	NA
1-1_GL0040368;1-1_GL0097533;1-1_GL0138491;1-2_GL0056317;1-2_GL0106369;10_GL0025698;2-1_GL0068363;2-2_GL0154178;2-3_GL0004587;2-3_GL0071040;2-4_GL0007561;3-1_GL0054518;4-1_GL0068204;4-2_GL0043523;5-5_GL0053324;5-8_GL0102626;7-1_GL0047885;G1-1A_GL0023674;G1-5A_GL0104085;MC-6-1_GL0049413	12467.7	11845.1	11448.9	11376.2	13072.9	12722.1	9903.13	11142.8	8695.94	7149.47	8314.42	8981.99	8818.05	8402.1	7721.81			P62880	7118.61	6033.83	6872.13	8386.71	8448.16	7562.01	8774	10383.6	11140.9	8232.73	8400.78	8922.5	7918.87	8538.62	8490.87
1-1_GL0040368;1-1_GL0097533;1-1_GL0138491;1-2_GL0056317;1-2_GL0106369;10_GL0025698;2-1_GL0068363;2-2_GL0154178;2-3_GL0004587;3-1_GL0054518;4-1_GL0033909;4-1_GL0068204;4-2_GL0043523;5-5_GL0053324;5-8_GL0063331;5-8_GL0102626;54_GL0082039;7-1_GL0047885;8-3_GL0010235;G1-1A_GL0023674;G1-5A_GL0104085;MC-6-1_GL0049413	249850	322373	278785	352219	371590	378175	408332	386891	400574	421704	415321	432304	416256	383746	404064			P62889	7365.95	6572.04	6294.82	6563.07	5764.86	6250.71	6424.95	6138.67	6330.95	5725.7	4605.47	2854.27	NA	5330.56	NA
1-1_GL0040368;1-1_GL0097533;1-1_GL0138491;1-2_GL0056317;1-2_GL0106369;10_GL0025698;2-1_GL0068363;2-3_GL0071040;4-1_GL0033909;4-1_GL0068204;4-2_GL0043523;5-5_GL0053324;5-8_GL0102626;7-1_GL0047885;G1-1A_GL0023674;G1-5A_GL0104085;MC-6-2_GL0178191	60670.6	63997.4	62701	40739	39626.1	44337.5	NA	NA	NA	NA	NA	NA	NA	NA	NA			P62897	24104.8	23933.6	19565.5	31361.8	28867.9	28418.6	25238.8	29328.1	33347	32688	27196.6	28849.1	29586.1	26506.8	32843
1-1_GL0040368;1-1_GL0097533;1-1_GL0138491;1-2_GL0056317;1-2_GL0106369;10_GL0025698;2-2_GL0154178;2-3_GL0004587;2-3_GL0071040;2-4_GL0007561;3-1_GL0054518;4-1_GL0033909;4-1_GL0068204;4-2_GL0043523;5-5_GL0053324;5-8_GL0102626;54_GL0082039;7-1_GL0047885;8-3_GL0010235;G1-1A_GL0023674;G1-5A_GL0104085;MC-6-1_GL0049413;MC-6-2_GL0178191	33307	34620.7	34652.6	401315	419157	NA	NA	NA	NA	NA	NA	NA	NA	NA	NA			P62900	8184.95	7535.58	6985.08	7342.55	7765.85	6498.44	8826.47	9833.25	10435.2	NA	11199.4	NA	11321.4	11030.2	NA
1-1_GL0040368;1-1_GL0097533;1-1_GL0138491;1-2_GL0106369;10_GL0025698;2-1_GL0068363;2-2_GL0154178;2-3_GL0004587;2-3_GL0071040;2-4_GL0007561;3-1_GL0054518;4-1_GL0033909;4-1_GL0068204;4-2_GL0043523;5-5_GL0053324;54_GL0082039;7-1_GL0047885;7_GL0094385;8-3_GL0010235;G1-1A_GL0023674;G1-5A_GL0104085;MC-6-1_GL0049413	9682.21	7913.92	6128.6	2418.77	1736.7	1173.16	1583	1697.13	1276.14	NA	NA	NA	NA	NA	NA			P62908	18747.6	19145.3	18305.7	17564.5	16166.5	16913.4	17847.2	18196.8	15960.9	15881.6	15980.7	16531.3	14068.5	14366.1	20357
1-1_GL0040368;1-1_GL0097533;1-1_GL0138491;1-2_GL0106369;10_GL0025698;2-1_GL0068363;2-2_GL0154178;2-3_GL0004587;2-3_GL0071040;2-4_GL0007561;3-1_GL0054518;4-1_GL0068204;4-2_GL0043523;5-5_GL0053324;54_GL0082039;7-1_GL0047885;8-3_GL0010235;G1-1A_GL0023674;G1-5A_GL0104085;MC-6-1_GL0049413	40940.7	38304.4	43045.1	36515.1	36992.5	31153.4	32980.2	30717.9	30191.3	16658.7	15819.8	16156.4	16003.3	10661.5	12451.5			P62918	7940.97	8434.55	8215.39	7681.51	7588.44	8159.06	8168.65	8615.53	8464.18	6797.31	NA	6767.53	NA	NA	NA
1-1_GL0040368;1-1_GL0097533;1-2_GL0106369;10_GL0025698;2-2_GL0154178;2-3_GL0071040;2-4_GL0007561;4-1_GL0033909;4-2_GL0043523;5-5_GL0053324;5-8_GL0102626;54_GL0082039;7_GL0094385;8-3_GL0010235;G1-1A_GL0023674;G1-5A_GL0104085;MC-6-2_GL0178191	6873.92	7043.27	5417.77	4444.57	5046.67	4320.64	4939.28	3804.7	NA	NA	NA	NA	NA	NA	NA			P62960	795.803	701.654	781.01	689.047	581.359	686.558	NA	NA	472.625	NA	NA	800.838	NA	NA	NA
1-1_GL0040368;1-1_GL0097533;2-1_GL0068363;2-2_GL0154178;3-1_GL0054518;4-1_GL0033909;4-1_GL0068204;5-5_GL0053324;5-8_GL0102626;7-1_GL0047885;MC-6-1_GL0049413	3863.54	3397.22	3895.27	2982.32	2244.59	1701.55	NA	3072.95	2732.05	NA	NA	NA	NA	NA	NA			P62962	6073.02	5838.68	5483.92	9675.97	8826.98	7278.63	9062.76	8649.48	9341.49	NA	10471.5	8715.67	13632.6	10293.6	NA
1-1_GL0040368;1-1_GL0138491;10_GL0025698;3-1_GL0054518;4-1_GL0033909;4-1_GL0068204;4-2_GL0043523;7-1_GL0047885;G1-1A_GL0023674;G1-5A_GL0104085;MC-6-1_GL0049413	7236.17	5651.98	6480.54	12835.4	NA	NA	NA	NA	NA	NA	NA	NA	NA	NA	NA			P62983	17954.4	45573.2	31310.9	105566	103212	93260.2	122096	125753	134508	101285	108073	99650.3	112809	110887	96870.9
1-1_GL0040368;1-1_GL0138491;1-2_GL0056317;10_GL0002188;2-1_GL0068363;2-2_GL0154178;2-3_GL0004587;2-3_GL0071040;2-4_GL0007561;3-1_GL0054518;4-1_GL0033909;4-1_GL0068204;5-5_GL0053324;54_GL0082039;7-1_GL0047885;8-3_GL0010235;MC-6-1_GL0049413;MC-6-2_GL0178191	21032.9	17932.5	17147.6	52073.8	46496.3	46496.2	463434	485239	489694	566603	NA	584004	NA	565397	546095			P63001	18562.7	19277.2	20308.4	20565.1	20109	20180.5	23629.6	24368.8	23559	23225.6	23951.2	24535.9	26876.5	23980.9	23265.6
1-1_GL0040368;1-1_GL0138491;1-2_GL0056317;2-1_GL0068363;2-2_GL0154178;2-3_GL0004587;2-4_GL0007561;3-1_GL0054518;4-1_GL0068204;4-2_GL0043523;5-5_GL0053324;5-8_GL0102626;7-1_GL0047885;MC-6-1_GL0049413;MC-6-2_GL0178191	313645	293720	298113	518745	498480	537666	631315	621049	644461	675106	660372	676999	667510	665131	671786			P63005	2146.44	2298.71	2300.6	2099.6	2209.51	NA	1818.66	2333.55	2013.92	NA	NA	NA	NA	NA	NA
1-1_GL0040368;1-2_GL0056317;2-4_GL0007561;4-1_GL0033909;4-1_GL0068204;5-5_GL0053324;54_GL0082039;7-1_GL0047885;8-3_GL0010235	4120.03	1668.6	1545.73	2358.7	1875.63	2033.83	1657.3	2733.06	1660.38	NA	NA	NA	NA	NA	NA			P63017	35295.8	38376.1	39092.8	39114.7	36681.5	37168.3	35976.8	36908.3	34007.4	32940.4	29549.9	29543.6	36722.1	34836.5	33226.2
1-1_GL0040368;2-4_GL0007561;4-1_GL0033909;4-1_GL0068204;54_GL0082039;7-1_GL0047885;8-3_GL0010235;MC-6-1_GL0049413;MC-6-2_GL0178191	33660.9	37668.5	35632.2	NA	27863.4	NA	NA	NA	NA	NA	NA	NA	NA	NA	NA			P63028	NA	2022.75	1463.01	NA	NA	NA	NA	NA	NA	NA	NA	NA	NA	NA	NA
1-1_GL0040368;2-4_GL0007561;4-1_GL0068204;4-2_GL0043523;5-5_GL0053324;7-1_GL0047885;G1-5A_GL0104085;MC-6-1_GL0049413	1958.16	2371	2003.87	NA	NA	NA	NA	NA	NA	NA	NA	NA	NA	NA	NA			P63038	17001	19104.5	17007.3	20397.1	21819.2	20121.1	19550.4	20783.7	21202.8	19160.4	20993.3	19850.5	20766.4	22161.2	20491.8
1-1_GL0040368;4-1_GL0068204	40352.5	38615	35859.2	32089.8	27638.6	22932.6	32758.9	34955.2	31850.8	18377	19542.9	13718.4	21701.5	15565.2	18786.5			P63094;Q6R0H7	1497.99	1842.15	2010.56	1625.52	1687.8	1767.02	1372.01	2042.61	2066.78	NA	1603.92	NA	NA	NA	NA
1-1_GL0040488	17225.7	17126.5	16620.7	16322.1	18865.9	15659.1	17851.4	18063.2	17423.3	18747	19628.4	17697.4	20725.7	17301	17599.3			P63101	30659.2	29174.1	30963.3	31239.4	32559.3	32968.5	33051.1	30180.2	34399.4	30844.8	29212.9	29439.8	27620.4	32830	32347.4
1-1_GL0040488;1-1_GL0041844;1-1_GL0135553;17_GL0054728;2-1_GL0009760;2-3_GL0062071;2-3_GL0062072;2-8_GL0100524;2-8_GL0100526;28_GL0037869;3-5_GL0047916;31_GL0034271;49_GL0077775;5-3_GL0006268;5-8_GL0134376;7-1_GL0019247;7-4_GL0069222;8-2_GL0111531;G1-1A_GL0092180;G1-1A_GL0102557;G1-5A_GL0096260;G1-5A_GL0133398;Group2-1A_GL0079313;Group2-3A_GL0074883;Group2-4A_GL0005454;Group2-4A_GL0005459;Group2-…	360451	358969	361890	447054	420403	432249	400684	394817	420218	473724	468134	467667	404928	432037	453156			P63158	7938.82	8673.23	9220.05	NA	NA	NA	NA	NA	NA	NA	NA	NA	NA	NA	NA
1-1_GL0040488;1-1_GL0041844;1-2_GL0002789;17_GL0054728;2-3_GL0062072;20_GL0063005;20_GL0178642;28_GL0037869;3-5_GL0081488;38_GL0006105;38_GL0076495;5-3_GL0006268;5-8_GL0134376;G1-5A_GL0096260;Group2-1A_GL0079313;S-Fe12_GL0075450	NA	12378.6	9640.19	NA	NA	NA	NA	NA	NA	NA	NA	NA	NA	NA	NA			P63276	1768.48	956.564	1400.24	2313.95	2351.62	2221.39	2462.36	2535.55	2476.33	NA	NA	NA	NA	NA	NA
1-1_GL0040488;1-1_GL0041844;17_GL0054728;2-3_GL0062071;2-3_GL0062072;49_GL0077775;5-8_GL0134376;Group2-1A_GL0079313;Group2-3A_GL0074883;S-Fe12_GL0075450;S-Fe12_GL0075454	998.235	1132.58	1172.95	712.89	NA	NA	NA	NA	NA	NA	NA	NA	NA	NA	NA			P63330	4005.91	4702.8	4525.43	4576.69	4700.25	4624.75	4574.95	4804.88	3282.98	NA	NA	NA	NA	NA	NA
1-1_GL0040488;17_GL0054728;2-1_GL0045814;2-3_GL0062071;2-3_GL0062072;20_GL0019808;28_GL0037869;49_GL0077775;5-3_GL0006268;5-8_GL0134376;G1-5A_GL0096260;Group2-1A_GL0079313;Group2-1A_GL0084123;Group2-4A_GL0108882;S-Fe12_GL0075450;S-Fe12_GL0075454	146769	184669	155091	NA	261954	NA	NA	NA	NA	NA	NA	NA	NA	NA	NA			P67778	10085.8	9190.64	9711.66	9455.37	9982.24	9413.2	8521.72	8912.85	8269.84	9587.63	9383.98	9493.42	12947.3	8372.69	11947.3
1-1_GL0040488;2-8_GL0037621;20_GL0063005;20_GL0178642;3-5_GL0081488;38_GL0006105;5-8_GL0134414;6-2_GL0061949;S-Fe7_GL0233959	3540.76	3841.49	3564.24	NA	NA	NA	NA	NA	NA	NA	NA	NA	NA	NA	NA			P67871	1626.42	1737.1	1692.12	1142.3	1262.57	1478.35	NA	NA	NA	NA	NA	NA	NA	NA	NA
1-1_GL0040659;1-1_GL0061372;3-2_GL0053877;Group2-8A_GL0009740	10096.7	8980.16	11153.7	11016.6	9062.72	9178.25	10880.1	12155.6	13029.3	6771.66	6716.91	6375.27	7156.74	5487.35	6129.95			P67984	10064.2	9078.57	8940.82	12737.7	12267.8	12685	13785.6	12715.2	11735.7	6469.78	8259.28	8560.92	9587.45	NA	7136.54
1-1_GL0040818	8258.17	9591.67	8603.65	8416.14	8464.86	7075.01	8957.03	8934.51	9084.95	7614.22	8641.15	7770.63	5993.3	7291.48	10095.5			P68040	9567.99	8735.47	9547.02	9484	9620.6	9989.33	9392.84	10645.1	10266.5	10380.5	10226	9776.46	9478.25	10501.5	10112.2
1-1_GL0040818;1-1_GL0116892;1-2_GL0109440;2-1_GL0014526;2-1_GL0092823;4-1_GL0044060;5-1_GL0025617;7-1_GL0050743;G1-5A_GL0100317;S-Fe2_GL0096220	85246.4	95199.6	98610.6	113509	114281	113364	123532	120533	123430	110261	94698	95180.3	101113	104383	106178			P68254	2187.09	1990.38	2038.04	NA	1726.46	2210.04	2053	NA	NA	NA	NA	NA	NA	NA	NA
1-1_GL0041200	2943.7	3357.84	3260.54	2920.01	3184.12	2921.28	2276.03	2973.13	2632.91	3562.86	2298.9	2917.74	3800	NA	3512.91			P68368	14728	13347.6	12433	12830.5	12923.6	13743.2	13857.1	13038.6	14889.7	12212	11923.6	15637.9	15781.7	13907.7	12074
11_GL0041387	33243.7	NA	28806.3	NA	NA	NA	NA	NA	NA	NA	NA	NA	NA	NA	NA			P68369;P68373	8863.98	9123.79	9243.9	10630.3	15509.7	13958.4	16791.8	16614.3	14090.4	9621.42	13443.1	8932.38	16382.9	11892.2	11891.1
11_GL0041387;43_GL0029674	5955.5	6784.09	5973.31	7911.1	7683.15	6881.42	6888.67	8058.91	6734.08	4145.75	4414.51	5908.09	6917.33	4512.09	6787.17			P68369;P68373;Q9JJZ2	NA	NA	NA	NA	3931.72	4121.71	3068.28	2797.37	3486.61	NA	NA	NA	NA	NA	NA
11_GL0041387;5-2_GL0024931	NA	49109.8	NA	120960	127194	NA	NA	NA	NA	NA	NA	63723.2	NA	NA	NA			P68372	13495.1	12428.3	12734.1	12135.8	11489.6	11732.4	11444.7	12977.7	12494.9	9334.86	8363.33	9429.85	10787.2	6320.99	7498.25
11_GL0041387;S-Fe5_GL0056502	27318.4	26450.5	28083.1	26292.9	24421.8	25405.5	20870.3	22180.5	22760.5	9236.29	8100.71	9376.17	10905.7	8375.94	10234			P68372;P99024	8618.79	9020.72	9168.86	9809.13	10628.9	9864.76	9808.93	9691.16	10406.3	8504.89	9316.79	9242.25	9081.44	7977.87	8108.64
1-1_GL0041447	5395.32	5743.9	5515.04	6473.83	7352.02	6438.29	9111.63	8462.51	5897.87	7485.73	NA	NA	6734.68	NA	NA			P68510	4094.5	4364.52	3607.23	3706.54	3195.94	3479.6	3837.15	3618.23	3509.65	3482.09	4189.12	3809.27	3399.03	3390.43	6141.89
1-1_GL0041447;3-1_GL0062029	32503.6	NA	30763.8	NA	NA	NA	NA	NA	23253.5	NA	27870.2	NA	19422.5	21092.6	22971			P70158	10670.4	10414.6	11143.5	12659.7	10686.4	14624.9	10989.3	12282.1	10843.1	11990.2	15617.3	15580.8	16137.1	15457.7	12371.8
1-1_GL0041844	14637.3	14046.6	13108.1	14595	14116.2	14296.5	14105.1	14053.9	15604.2	11951.7	12674.3	12431.2	11261.3	12100.6	13887			P70168	1902.88	1696	1774.04	2010.09	NA	NA	NA	NA	NA	NA	2734.24	NA	NA	NA	NA
1-1_GL0041844;1-1_GL0135553;1-2_GL0059967;10_GL0015619;14_GL0016880;1_GL0043524;2-1_GL0033208;2-1_GL0039651;2-1_GL0043783;2-1_GL0045814;2-1_GL0095220;2-2_GL0126451;2-3_GL0062059;2-8_GL0037621;20_GL0019808;2B-dyr23-07_GL0049983;3-1_GL0097688;3-2_GL0068898;4-4_GL0081307;5-7_GL0037700;5-8_GL0004261;5-8_GL0134414;54_GL0078610;6-2_GL0061949;6-3_GL0000806;7-5_GL0144179;7_GL0033364;8-2_GL0111531;G1-5A_G…	361982	430607	351658	438558	NA	589388	NA	NA	NA	NA	NA	NA	NA	NA	NA			P70172	NA	670.89	647.483	NA	NA	NA	NA	NA	NA	NA	NA	NA	NA	NA	NA
1-1_GL0041844;2-1_GL0039651;20_GL0019808;G1-1A_GL0102557;Group2-6A_GL0131438;S-Fe12_GL0075454	18383.9	17733.5	18800	26264.9	29823.1	29106.5	29829.1	28348.1	24675.9	NA	NA	31230	27647.5	29634.8	NA			P70195	4494.11	4786.1	4450.72	5519.36	6965.32	5771.71	7453.11	5410	5162.76	9921.11	8344.78	3813.3	7022.54	8058.75	NA
1-1_GL0041844;31_GL0034271	NA	337.522	450.567	NA	NA	NA	NA	NA	NA	NA	NA	NA	NA	NA	NA			P70202	6847.28	5506.21	6055.83	6165.32	5568.51	5490.02	7215.59	5624.83	5921.6	NA	NA	3253.12	NA	NA	NA
1-1_GL0041857	20329.4	32783.4	19230.7	28158.2	27521	24622.2	34600.5	34288.1	35719.7	31826	33131.8	33173.8	36930.5	35377.4	35236.7			P70296	6046.38	6268.91	6727.51	5625.92	5181.11	5105.31	6031.22	5358.65	5328.83	3372.95	3299.89	NA	5193.54	NA	5640.01
1-1_GL0041857;11_GL0053374;1A-dyr4-07_GL0028776;2-1_GL0106976;2_GL0025466;3-7_GL0067223;4-1_GL0035742;5-1_GL0042433;6-3_GL0057956;6-7_GL0028379;7-3_GL0054179;7-4_GL0040368;8_GL0038333;Group2-7A_GL0057465;S-Fe2_GL0192770	NA	NA	NA	17511.9	12173.7	13729.9	17561.7	16363.5	13244.8	19131.7	NA	14663.8	NA	NA	NA			P70302	2063.78	1571.14	1502.5	2208.24	2358.4	1733.27	1855.32	2048.86	1651.76	NA	NA	NA	NA	NA	1348.11
1-1_GL0041857;1-1_GL0078624;11_GL0010402;11_GL0161434;1A-dyr2-07_GL0017940;1A-dyr2-07_GL0060154;2-1_GL0043938;2-1_GL0061307;2-8_GL0078176;2_GL0025466;3-7_GL0067223;32_GL0021838;4-2_GL0084916;4-7_GL0095119;4-8_GL0070713;6-2_GL0018346;6-4_GL0066269;6-5_GL0061757;6-7_GL0028379;7-4_GL0040368	6871.52	6276.72	5134.19	3954.68	3060.4	2996.56	4862.01	4713.44	3733.58	NA	NA	NA	NA	4168.65	NA			P70349	NA	6196.26	6458.83	8134.64	7116.91	5406.71	7928.99	9179.29	6847.47	NA	5413.81	NA	NA	NA	7525.54
1-1_GL0041857;1-1_GL0078624;1-1_GL0145214;11_GL0010402;11_GL0053374;11_GL0161434;1A-dyr2-07_GL0017940;1A-dyr2-07_GL0060154;1A-dyr4-07_GL0028776;2-1_GL0043938;2-1_GL0061307;2-1_GL0106976;2-8_GL0078176;2_GL0025466;3-7_GL0067223;32_GL0021838;4-1_GL0035742;4-1_GL0052696;4-2_GL0084916;4-7_GL0095119;4-8_GL0070713;5-1_GL0042433;6-2_GL0018346;6-3_GL0057956;6-4_GL0066269;6-5_GL0061757;6-7_GL0028379;7-3_GL…	64421.6	69102.6	63462.7	87185.1	92987.4	1.35719e+06	1.12126e+06	1.04137e+06	1.09725e+06	1.34544e+06	1.39434e+06	1.29583e+06	1.03683e+06	1.03694e+06	1.07683e+06			P70412	310421	299460	281951	304339	311215	297453	303829	291059	306886	247681	243386	250957	223409	219938	226947
1-1_GL0041857;11_GL0161434;2-1_GL0043938;2-1_GL0061307;6-7_GL0028379	NA	11313.8	10362.1	NA	NA	NA	NA	NA	NA	NA	NA	NA	NA	NA	NA			P70441	29836.5	29747.9	30385.3	27325.1	25676	25798.5	24659.8	25475.7	23949.5	25125.8	24274.6	24478.4	22571.5	23020.4	21052.7
1-1_GL0041857;2-1_GL0106976;4-1_GL0035742;5-1_GL0042433;6-7_GL0028379;7-3_GL0054179	49392.7	36252.2	41692.5	115531	112174	108452	124013	117393	132433	127754	NA	139748	NA	132642	136037			P70665	19046.6	17384	17820.5	17532.5	16704.9	16184.7	16274.8	15828.2	15061	11854	11347.1	12925.9	9695.28	12862.6	11368.2
1-1_GL0041857;2-1_GL0106976;4-1_GL0035742;7-3_GL0054179	78032.6	71127.1	66527.7	102630	108817	115610	110649	105983	103014	96937.1	97420.1	111108	109079	103917	102253			P70670;Q60817	1923.23	1703.64	1993.75	2084.11	1838.13	1950.78	NA	2003.56	1733.15	NA	NA	NA	NA	NA	NA
1-1_GL0042003;17_GL0101032;4-8_GL0087013	22237.7	22489.2	23976.2	25297.9	24419.5	24047	22341.4	25403.3	23528.9	23073.7	23282.9	22513.7	22882.5	22885.4	24791.2			P70677	14838.8	15937.4	16150.2	16332	17303.3	18346.2	18580.2	17068	16330.4	16455.4	17387.8	15841.2	NA	15098.7	18209.7
1-1_GL0042165	5907.74	5579.46	5444.88	6319.68	5699.23	5827.84	5087.33	5473.3	5489.34	4723.18	6168.98	7228.42	NA	6925.32	NA			P70695	4338.57	4454.1	4184.22	4707.7	4693.11	4462.67	5358.16	4781.06	5136.74	5146.34	5690.37	4992.86	NA	NA	4588.95
1-1_GL0042165;1-4_GL0059879	7363.72	8188.32	8102.86	7922.07	7496.38	7497.73	8538.35	6943.23	6961.8	NA	4047.5	NA	NA	NA	NA			P80313	2720.39	2940.6	3042.15	1767.75	2562.52	2913.22	NA	NA	NA	NA	NA	NA	NA	NA	NA
1-1_GL0042165;1-4_GL0059879;S-Fe7_GL0070778	10736.9	10463.6	10310.1	10236.6	10393.1	10640.7	10088.4	10570.5	10167.1	9145.99	10286.2	9256.48	9842.26	11396.3	13659.3			P80316	4272.32	5388.4	4982.28	4636.11	5717.16	NA	4435.8	4882.57	5881.27	NA	4632.38	NA	NA	NA	NA
11_GL0042282;14_GL0000416;14_GL0118341;2-3_GL0050614;S-Fe4_GL0132117	17391.2	16867.3	16292.2	NA	NA	NA	NA	NA	27007.1	NA	NA	NA	NA	NA	NA			P80318	1485.63	1515.48	1475.96	1282.19	1711.43	1776.72	1503.89	850.308	1237.7	NA	NA	NA	NA	NA	NA
11_GL0042282;14_GL0118341;S-Fe4_GL0132117	7340.46	6828.42	9154.7	12566.9	11985.9	12716	12164.3	13089	11111.3	10478.5	13424.2	13151.5	16864.6	14822	12666.7			P83882	4553.27	3590.32	3706.41	3612.39	3953.48	3915.41	3943.46	4503.1	3725.9	2939.36	4199.49	4511.85	3958.32	3974.94	4723.5
11_GL0042282;2-2_GL0081124;2-3_GL0050614;MH-6-5_GL0129225;S-Fe2_GL0013443;S-Fe4_GL0132117;S-Fe9_GL0229005	38122.8	33967.8	35338.7	55620.5	54291	57088.1	54417.2	57152.1	58192.8	54227.2	54634	57782.9	53670.6	57269.8	47158.8			P84084	3692.79	3408.69	3467.86	3608.68	3656.24	3313.2	3651.18	3960.25	4078.78	NA	NA	NA	NA	NA	NA
11_GL0042282;S-Fe4_GL0132117	6264.07	7261.31	5990.46	7753.57	6359.01	6825.42	7895.86	8326.13	6622.76	7852.76	8337.28	7794.97	8462.65	NA	NA			P84099	4105.96	3576.19	3176.2	3541.65	4059.26	3967.89	3643.59	3511.78	2779.81	4693.45	NA	NA	NA	NA	NA
11_GL0042296	4078.31	4056.34	3948.02	3770.05	4093.08	3266.97	3979.34	4437.02	3630.65	5484.72	NA	5269.44	6693.7	NA	6646.98			P97290	2304.87	2307.15	2624.7	2512.14	NA	NA	NA	2698.6	NA	NA	NA	NA	NA	NA	NA
11_GL0042298	4518.98	5286.71	4887.74	5855.25	5899.73	4863.14	5324.02	6102.42	5752.22	6193.84	6073.29	7519.41	NA	6318.57	NA			P97300	12603.4	14953	14310.8	15444.7	15948.2	12765.9	15694	14783.7	14855.3	12694.8	NA	5310.83	9753.8	11302.7	NA
11_GL0042302	5118.36	5511.14	5150.67	7644.65	7124.87	7657.58	7109.08	7210.88	6390.76	6436.14	6907.92	8440.59	7002.59	7252.58	7810.63			P97315	2053.55	2182.65	2029.71	NA	NA	NA	NA	NA	NA	NA	NA	NA	NA	NA	NA
11_GL0042311;6-5_GL0038419	4766.14	4769.4	4790.47	5053.29	4958.7	4650.68	5281.66	3955.2	4573.25	2716.97	4707.79	4069.93	NA	NA	NA			P97351	5465.92	5190.9	4741.3	6104.05	6765.09	7250.03	5534.83	8464.45	9099.12	7391.51	6950.35	NA	NA	6186.41	NA
1-1_GL0043110	8014.72	7797.45	8353.14	6646.54	8122.92	6988.29	7841	7769.17	9682.15	6407.53	6358.47	5331.84	4250.34	3125.87	4106.43			P97371	1558.61	NA	727.304	NA	1050.13	1243.8	1095.89	NA	1327.43	NA	NA	NA	NA	NA	NA
1-1_GL0043549	7912.85	8119.47	8758.14	12143.4	10938.4	10919.2	11527.4	11972.9	11130	10551.1	10053.8	10287.9	11512.8	9000.82	8926.72			P97384	44718.7	59355	51085.6	59419.1	59544.6	58253	63684.2	57790	58863	57588.9	57963.6	57663.6	60160.6	56725.2	62395.3
11_GL0043820	61046.1	61379.6	60766.9	55444.7	53075.4	51256.3	48245.6	49693.9	52022.2	47536.1	45584.6	45814.3	41957	41609.3	44386.2			P97429	395541	425939	385821	489918	497803	470731	487545	491030	469889	456951	469366	455919	483200	443064	471321
11_GL0044796	48286.1	48462.5	50382.3	51040.4	52009.8	49457.6	46539.9	51485.3	48498.4	46236.6	47135.9	45651.6	41630.1	47677.1	40072.3			P97430	1943.96	1703.26	1997.25	2919.75	2694.64	2359.88	NA	2871.16	2689.46	NA	NA	NA	NA	NA	NA
11_GL0044796;17_GL0083926;20_GL0054153;26_GL0091341;S-Fe18_GL0004478	13074.3	19177.7	11352.6	NA	NA	NA	NA	NA	NA	NA	NA	NA	NA	NA	NA			P97435	24929	25732.5	28665	25021	23392.8	22728.2	23023.3	23942.4	24140.9	25104.8	24262.3	22024.8	23449.8	27757.3	26985.7
11_GL0044818	6755.29	7441.65	6497.11	6618.63	6112.31	7441.28	NA	6172.17	5856.32	6589.57	NA	6922.94	NA	NA	NA			P97447	11975.6	11381	11063.2	10943.5	10685.1	10714.5	8983.77	9027.09	8746.12	8638.95	8496.57	9353.7	NA	10317.1	NA
11_GL0044818;11_GL0135547	20549.1	26366.6	28863	50116.6	31605.7	44641.2	47295.3	51543.7	49041.9	35963	40055.2	34681.7	37162.8	34179.7	37294.1			P97449	626912	694646	652342	786761	790862	790619	796097	791429	807823	798833	798626	789276	789684	751629	774012
1-1_GL0044924;11_GL0099668;MC-0-1_GL0059613;MC-0-1_GL0067284;MC-6-4_GL0039012;S-Fe10_GL0092477	11786.2	13179.6	14869.4	14354.4	14534.6	15660.3	13389.5	14523.3	11449.4	16684.4	15420.1	15871.8	12160.9	NA	NA			P97450	NA	1782.7	1410.58	1662.56	1559.59	NA	1885.25	1681	2354.9	NA	NA	NA	NA	NA	NA
1-1_GL0044926;MH-6-1_GL0022671	NA	NA	16017.6	8737.22	8633.01	8380.41	6636.47	6752.72	6666.86	NA	NA	NA	NA	NA	NA			P97461	6774.92	7031.41	7133.42	8396.03	8152.66	8075.73	7579.51	6449.65	7890.58	7904.45	NA	9081.45	NA	NA	NA
1-1_GL0044932;MC-0-3_GL0046641;S-Fe10_GL0092485	39258.7	35014.2	35652.4	28991.7	30463.4	29196.1	33305.1	32111.1	31745.6	26945.3	30269	28077	29606.9	27067	32931.6			P97742	5105.8	4479.23	4774.31	6062.37	5897.5	6493.98	5669.75	5234.46	5586.05	NA	5070.28	NA	NA	NA	NA
1-1_GL0044935;13_GL0044720;20_GL0110213;MC-6-4_GL0000222;S-Fe10_GL0092488;S-Fe1_GL0076123	33495.5	31755.3	31136	NA	NA	NA	NA	NA	NA	NA	NA	NA	NA	NA	NA			P97792	5763.09	6081.08	6023.41	5632.38	5960.98	6176.17	6031.92	6080.89	5938.16	4845.4	5121.36	4880.52	NA	NA	NA
1-1_GL0044935;20_GL0110213;MC-6-4_GL0000222;S-Fe1_GL0076123	4639.04	4084.38	4316.76	4315.44	4344.35	3845.13	3283.57	3938.67	3677.88	1520.07	2003.63	2743.71	1778.25	2284.06	1257.35			P97805	6505.87	6327.29	5791.06	6553.28	6267.23	6842.42	5727.53	6399.89	NA	4536.81	NA	5480.27	NA	NA	NA
1-1_GL0044944	2359.02	3180.93	3550.18	4552.39	4665.76	5737.23	4965.52	4494.41	3196.14	NA	NA	699.852	NA	NA	NA			P97807	7771.58	5217.23	6814.76	7666.59	7327.11	6999.35	7582.9	7025.88	7209.84	8205.93	6463.2	6667.72	7040.68	7333.47	7297.1
1-1_GL0044944;MC-0-1_GL0079955;S-Fe10_GL0076449	10547.5	36880.6	33512.3	NA	27226.3	NA	NA	NA	NA	20868.5	NA	20597	20648	NA	20987.6			P97821	16894.9	17508.9	16103.7	17859.2	17434.3	17067.7	18414.8	15530.6	15868.4	12698	NA	NA	NA	NA	NA
11_GL0045555	12417.5	13519.4	11823.2	14408.4	14985.8	13736.2	13460.6	NA	14814.1	NA	12650.3	NA	NA	NA	NA			P97861;Q9ERE2	2362.94	1985.6	1891.4	NA	2310.99	2311.5	NA	NA	693.402	NA	NA	NA	NA	NA	NA
1-1_GL0045586	41393.9	24702.8	35013.9	62528.8	56757.6	58923.4	60657	61248.6	62658.6	64140.2	65596.9	64800.4	60294.7	64718.5	56017.3			P99024	2240.04	1932.42	1883.8	1493.8	1715.17	1553.03	1957.55	NA	1688.76	NA	NA	NA	NA	NA	NA
1-1_GL0045676	9715.29	9874.77	9566.44	8184.72	7898.34	8350.23	7648.27	6727.06	6909.69	6880.3	7852.65	7640.82	7175.45	6368.04	8273.13			P99026	18319.4	19041.8	18747.5	16912.8	16831.7	17928.6	15262.6	15926.1	15314	16480.5	13499	14373.5	17188.1	18925.5	13424
1-1_GL0045676;1-7_GL0042718	7119.87	7105.38	5295.85	8598.47	8706.22	8005.95	9860.57	8205.21	8947.8	NA	7506.56	7303.68	8858.27	6238.86	7002.01			P99028	7083.18	6667.29	6524.8	5825.55	5519.35	6034.98	5793.2	6392.56	6702.59	NA	NA	NA	NA	NA	NA
1-1_GL0045676;1-7_GL0042718;MH-6-3_GL0122153;MH-6-5_GL0107885;MH-6-5_GL0173924	6959.24	7673.17	8252.55	7186.02	6814.51	6610.9	6380.82	6706.27	6626.18	4612.25	4069.07	4473.62	3277.67	4919.43	5032.77			P99029	3543.06	3454.97	3449.94	3216.54	3143.72	3382.55	2676.21	2672.98	2739.82	NA	3265.11	NA	NA	NA	NA
1-1_GL0045676;MH-6-5_GL0107885	10813.5	10969.8	11018.3	11207.4	12035.3	11870	12633.4	12098.1	13248.2	11072.4	12553.9	11251.8	10509.3	10977.1	10678.1			Q00519	7948.97	8563.08	7940.52	12004	12173.2	12485.2	10490	9963.56	11313.7	11228.4	10691.5	11867.8	11643	11191.3	12006.1
11_GL0045958;26_GL0139638	932.215	1094.03	993.952	NA	NA	1367.22	NA	NA	NA	NA	NA	NA	NA	NA	NA			Q00519;Q3TYQ9	14145.3	13025.8	12816.6	12293.3	11684.4	11441.7	13751.8	12926.4	NA	11430.5	14178.7	15098.7	12865.5	19995.1	16818.7
1-1_GL0046107	5569.74	6899.97	6442.16	4644.96	5321.58	4843.83	5998.88	5623.56	5859.24	4593.98	3420.71	4881.58	4745.7	3400.47	NA			Q00612	NA	NA	NA	6721.75	6815.71	7671.46	6776.44	9853.89	NA	10734.2	9794.07	NA	NA	NA	NA
1-1_GL0046107;4-1_GL0019852;Group2-8A_GL0037214	29389.8	28969	31538.3	27385.2	24685.6	22063.1	23725.3	22163.3	23650.5	14498	13528	15393.6	13597.8	12554.8	14144			Q00623	2520.72	2393.36	2634.15	2275.33	2485.15	NA	NA	NA	NA	NA	NA	NA	NA	NA	NA
1-1_GL0046574;1-1_GL0068022;1A-dyr1-07_GL0037352;34_GL0066279;4-6_GL0073545;6-1_GL0078460	15420.4	16704.7	16332.2	16468.9	17493	15817.1	17441.5	17805.3	16565.3	14028.1	13140.4	15491.8	12368.9	13666.6	10736.4			Q00897	31541.7	34919.6	36737.6	38091	36465.2	33729.7	35323	33265.1	37968.1	20797.3	23161.8	18898.3	19321.4	22169.3	24114.8
1-1_GL0047300	5574.1	4814.51	4896.92	NA	NA	NA	2800.41	NA	4167.25	NA	NA	NA	NA	NA	NA			Q00898	2927.32	3415.4	2771.36	2164.27	2407.96	2310.59	2341.18	2459.13	2361.62	NA	NA	NA	NA	NA	NA
1-1_GL0047300;11_GL0082595;11_GL0134598;1A-dyr4-07_GL0009278;2-4_GL0080874;20_GL0080668;3-5_GL0046732;5-3_GL0001484;5-8_GL0054043;5_GL0105816;7-6_GL0114556;8-4_GL0080717;Group2-3A_GL0108781;S-Fe10_GL0162607;S-Fe12_GL0083542	19640.4	16399	19709.2	NA	NA	NA	NA	NA	NA	NA	NA	NA	NA	NA	NA			Q01768	24264	23160	23975.9	19265.4	18378.5	16850.7	18313.3	19667.6	18823.2	NA	NA	NA	NA	NA	NA
1-1_GL0047300;3-5_GL0046732;5-3_GL0001484;5-8_GL0054043;7-6_GL0114556;Group2-3A_GL0108781;S-Fe10_GL0162607;S-Fe12_GL0083542	10395.4	11373.7	10073.8	NA	NA	NA	NA	NA	NA	NA	NA	NA	NA	NA	NA			Q01853	7898.96	8847.29	8310.77	8056.61	8522.17	8058.14	7987.16	8967.87	8405.69	7064.71	9316.72	7672.4	10758	8027.73	9026.57
1-1_GL0048366	1463.69	1696.13	1700.08	1417.86	1051.52	1446.7	1552.22	1292.23	1479.69	NA	NA	NA	NA	NA	NA			Q02013	8315.56	8120.04	7850.18	7878.14	8708.47	7791.49	6840.35	7499.57	6517.34	6845.75	4830.98	6229.22	5485.2	7294.48	5526.3
1-1_GL0048366;6-6_GL0089718	18478.5	15949.6	16254	11571.2	10940.4	8532.43	11805	13124.8	11054.7	NA	NA	12993.5	NA	NA	13447.8			Q02053	5172.34	5155.99	4859.43	4984.99	5215.85	5248.21	4464.82	4056.07	4670.87	3874.41	4120.05	4662.53	NA	NA	NA
11_GL0048662	7151.53	7541.06	6710.09	8085.35	7493.78	6911.07	6480.69	5634.83	5412.13	6625.49	NA	NA	4722.37	NA	NA			Q02248	3587.85	3685.54	3630.24	3351.06	3541.23	3333.08	3008.42	2663.57	3084.89	3629.99	4086.3	2992.94	2944.8	2683.65	NA
11_GL0048685	NA	NA	NA	NA	NA	NA	NA	NA	NA	NA	NA	NA	NA	NA	115311			Q02248;Q02257	NA	1822.6	1990.7	2626.98	2522.84	2631.95	NA	1829.69	NA	NA	NA	NA	NA	NA	NA
11_GL0048685;11_GL0139961;20_GL0082096;20_GL0126153;3-2_GL0019842;3-3_GL0088496;4-3_GL0063749;4-8_GL0060722;5-4_GL0117453;6-7_GL0016691;Group2-7A_GL0036496;S-Fe2_GL0133793;S-Fe6_GL0005610	2940.14	2711.02	3122.94	NA	NA	NA	NA	NA	NA	NA	NA	NA	NA	NA	NA			Q02257	2716.01	3678.24	4178.29	2437.07	2858.57	2499.67	2720.9	3038.49	2586.17	2248.1	2600.25	2550.85	NA	2402.69	NA
11_GL0048685;11_GL0143116;20_GL0147742;3-2_GL0019842;3-3_GL0088496;4-8_GL0060722;Group2-7A_GL0036496;S-Fe6_GL0005610	NA	1842.56	1597.02	1783.88	1044.71	1428.73	NA	NA	NA	NA	NA	NA	NA	NA	NA			Q02566	42709.3	38205.1	37574.2	NA	NA	NA	NA	NA	NA	NA	NA	NA	NA	NA	NA
11_GL0048685;20_GL0082096;3-2_GL0019842	4623.34	4816.64	6090.65	4532.22	5288.23	4419.58	3994.75	4199.46	3851.13	3536.75	4625.07	3793.74	2956.25	3464.2	4133.79			Q02819	3481.68	3488.39	3720.71	3368.86	3886.17	4117.89	2701.66	2584.61	2549.37	NA	NA	NA	NA	NA	NA
11_GL0048685;20_GL0082096;S-Fe6_GL0005610	168379	161466	156468	173894	177888	172494	167482	165262	176532	183170	176272	175478	173845	171880	158193			Q03265	184351	178468	160845	183126	178113	179200	182770	184769	179030	209288	205847	200624	214243	196052	204956
11_GL0048685;3-2_GL0019842;3-3_GL0088496;4-8_GL0060722	10853.8	10043.2	9750.17	10177.1	11262.4	10416.2	10341.3	8692.16	10887.6	9905.51	NA	6512.97	8667.77	7734.85	8388.4			Q03311	1849.42	2031.19	1971.92	2863.47	NA	2009.09	2699.8	NA	NA	NA	NA	NA	NA	NA	NA
1-1_GL0048765;1-1_GL0092522;1-2_GL0125305;11_GL0041387;1A-dyr4-07_GL0009722;2-2_GL0111604;2-3_GL0002598;2-8_GL0005311;3-1_GL0086169;3-5_GL0005950;3-5_GL0037612;3-5_GL0070222;32_GL0111881;4-1_GL0007488;4-2_GL0086461;4-3_GL0023577;4-4_GL0083540;43_GL0029674;5-2_GL0024931;5-6_GL0012253;5-6_GL0015745;6-5_GL0072187;7-5_GL0167262;8-1_GL0074410;8-6_GL0099766;G1-1A_GL0021347;G1-5A_GL0103365;Group2-3A_GL0…	198158	247110	220869	189613	187987	220610	221784	236722	246967	247128	238212	228965	236085	226314	210082			Q03404	7427.64	8176.13	7676.93	4016.22	4130.76	4233.76	NA	4649.5	4802.93	4168.85	3496.73	4362.02	3277.18	5018.49	4104.6
1-1_GL0048765;1-1_GL0092522;1-6_GL0017811;11_GL0041387;2-3_GL0002598;32_GL0111881;4-4_GL0083540;5-2_GL0024931;6-5_GL0072187;7-5_GL0167262;7-8_GL0106456;8-1_GL0074410;G1-1A_GL0021347;MC-6-2_GL0001188;MC-6-2_GL0009019	29628.2	26307.1	25974.3	23891.5	27643.8	14088	25336.8	39234	NA	8826.52	1658.95	NA	11299.5	12402.3	10529.7			Q03734	4027.32	4498.98	3959.38	4276.72	4398.84	4203.56	4215.82	3554.26	4088.24	NA	4638.34	4293.4	NA	5276.35	5532.62
1-1_GL0048765;1A-dyr4-07_GL0092337;32_GL0111881	10837.1	10362.2	10746.8	11121	10428.2	10752.9	9231.48	9200.98	9666.59	9937.79	11321.7	7016.17	5616.34	7162.73	8734.85			Q05117	2627.7	2527.82	2382.16	2221.99	1752.73	1329.17	1715.25	2023.75	1541.28	NA	NA	NA	NA	NA	NA
1-1_GL0048765;4-4_GL0083540;4-7_GL0028961;S-Fe20_GL0019704	NA	NA	NA	2156.31	5001.24	4033.03	NA	NA	NA	NA	NA	NA	NA	NA	NA			Q05920	12080.9	11614.7	12653.8	12276.7	11745.7	12636.5	11867.1	12158.9	11675.4	14042.5	11078.3	11277.1	13263.9	12466.1	10649.4
1-1_GL0048765;G1-1A_GL0021347;MC-6-2_GL0001188;MC-6-2_GL0009019;S-Fe5_GL0056502;S-Fe6_GL0118707	36996.4	NA	NA	24935.6	21406.2	25914.3	26316.3	26881.9	28406.1	9975.96	8352.31	8280.94	6489.74	7127.87	NA			Q06138	4449.05	4279.43	3946.01	5027.51	4724.43	5142.77	3573.8	5256.73	5130.08	NA	NA	NA	NA	NA	NA
1-1_GL0049429	29145.6	24918.6	23389.7	45497.9	49022	48910.8	52646.8	54450.7	46996.6	48982.7	53853.5	56163.9	53811.6	51339	52579.2			Q07076	24561.8	28062.7	27584.2	26341.9	24600	25599	27345	25128.4	26367.3	24906.3	26612.4	25081.8	24548.8	24986.6	30340.4
1-1_GL0049429;1-1_GL0077794;14_GL0013085;1B-dyr11-07_GL0022599;S-Fe10_GL0072606	16323.6	16709.1	17720.1	16362.1	16048.7	15630.3	12268	11886.6	11705.9	6974.23	NA	5659.08	5761	4079.78	8882.93			Q07417	16974.3	17711.1	16692.2	18090.9	18654.2	17200.4	18543.3	17782.5	17742.7	16583.7	15987.4	16406.5	14567	16015.9	17362.9
1-1_GL0049429;1-1_GL0077794;1B-dyr11-07_GL0022599;S-Fe10_GL0072606	8274.5	6764.12	9686.6	13718.7	15145.7	15672	10801.2	13616.9	14171.6	28960.7	23089.5	19616.1	26279.5	32553.6	24227.3			Q07456	8362.65	NA	8151.99	10255.5	9692.44	10923.4	10531.1	9234.19	NA	9268.21	NA	NA	NA	NA	NA
11_GL0049644	11889.1	12768	12222.5	16653.2	18312.3	18532.9	22530.7	22323.2	22153.4	17712	18409.1	17315.6	25740.5	22721.4	22207.9			Q07797	27980.8	28300.7	28216.1	29147.4	28447.3	27948.4	25075.7	26005.5	27916.1	29120.9	26366.6	24619.6	24303.1	24389.3	21493.8
11_GL0049644;4-7_GL0083512	NA	4093.16	NA	3314.49	2840.93	2829.24	2870.2	3084.58	2488.07	NA	NA	NA	NA	NA	NA			Q07813	2465.61	2640.41	2554.43	2725.35	2497.23	2871.77	NA	3065.94	NA	3021.9	NA	2840.48	NA	NA	2254
1-1_GL0050864	13068	12366.9	11894	8673.23	10704	9545.85	10738.2	10384.4	10560.4	NA	11199.6	11836.2	10556.9	9709.95	10734.6			Q08189	29182.6	30788.3	29309.8	28298.7	29651	29421.2	25585	26416.8	27905.6	26471.7	26051.3	24133.6	22802.8	23734.6	22075.1
1-1_GL0050864;11_GL0132807	6161.96	6996.08	5140.03	5363.33	5258.12	5025.28	4527.61	5480.94	5561.61	NA	NA	NA	1873.69	1082.44	3401.98			Q08509	4380.84	4801.63	4679.36	5158.98	5012.65	5197.51	5664.78	6197.52	5497.52	5489.48	6240.25	6916.55	6752.65	NA	NA
1-1_GL0050864;11_GL0132807;S-Fe20_GL0135464	13890.7	13475.5	13016.8	12863.1	11603.9	11628.4	12723.7	14422.2	9831.84	13970.8	15073.7	NA	NA	NA	11739.8			Q08731	102446	103627	103833	113632	108294	108932	93141.1	101753	97338.3	96494.8	76392.8	66308	80670	57967.7	50056.4
1-1_GL0050864;11_GL0132807;S-Fe7_GL0142498	14958.5	14226.5	16118.2	12208.2	13874.5	13458.5	13500	14042.9	12739.5	7995.08	7163.46	6531.28	6993.46	5402.26	11426.5			Q08857	4421.76	4728.72	4370.94	6223.63	5500.35	5613.16	5747.82	5509.18	6171.59	7563.54	5575.13	5049.76	NA	4483.11	NA
1-1_GL0050864;1A-dyr2-07_GL0072819;20_GL0150260;26_GL0110301;5-8_GL0094007;G1-1A_GL0054686;G1-1A_GL0096517;MH-6-4_GL0014461;MH-6-4_GL0043857;S-Fe10_GL0153182;S-Fe20_GL0078171	20853	19816.2	19512.5	29610.3	30477.3	28472.1	27366	29748.2	32016	30236	25723.8	27176.6	26457.3	27919.6	24775			Q09199	5699.31	6252.96	5858.32	6177.64	6524.58	6046.46	7891.67	6509.61	5985.75	NA	5690.44	NA	10018	NA	NA
11_GL0051055;6-6_GL0061156	2706.29	NA	2717.15	5067.44	NA	3921.17	5632.69	6622.14	5571.32	NA	NA	NA	NA	NA	NA			Q0VG18	11711.5	10766.5	10605.1	11914.4	10400.8	11151.8	11874.6	11889.5	11186.3	10222.8	8926.86	10356.8	9361.38	NA	9330.89
11_GL0051057	7701.39	8509.82	8371.32	10128.3	10765.5	10536.9	9929.41	10786.3	10164.5	12029.2	11981.1	11148.1	12166.4	11497.7	14335.3			Q10738	5028.38	5375	5538.84	9309.39	9586.54	9311.54	8100.28	10373.3	9753.38	10629.6	8594.94	12821.3	10260.4	NA	NA
11_GL0051057;2-7_GL0046144;4-1_GL0069166;4-2_GL0117370;5-1_GL0073748;6-2_GL0017794;G1-5A_GL0006982	3805.5	4916.25	4547.81	NA	NA	NA	NA	NA	NA	NA	NA	NA	NA	NA	NA			Q11011	2808.53	2913.8	2686.57	3249	3145.66	3413.05	4198.53	3557.33	3672.76	11233.2	3843.3	NA	NA	NA	NA
11_GL0051058;6-4_GL0027710	13645.3	12279.2	11652.6	17362.3	19058.7	18222.1	17242.5	19755.9	18865	14990.2	12550.2	20373.1	NA	16567.1	16198.4			Q11136	153141	134339	131898	134073	145902	136919	128952	127540	137074	109222	105133	97626.6	105537	102785	100111
11_GL0051059;6-7_GL0081590	5418.96	3909.45	4819.68	4674.35	4799.3	5128.76	4792.63	4165.27	4076.34	3555.66	3537.93	4184.45	4048.08	NA	4265.19			Q148W0	NA	NA	NA	4646.25	4300.62	4701.11	4458.01	4596.01	4363.29	NA	4149.75	NA	NA	NA	NA
11_GL0051060;1A-dyr2-07_GL0001243;1A-dyr4-07_GL0032849;1A-dyr4-07_GL0089322;2-1_GL0029805;2-3_GL0035843;2-5_GL0002629;2-6_GL0037079;3-1_GL0077018;35_GL0053560;4-3_GL0089082;6-2_GL0017797;6-2_GL0090396;6-4_GL0040307;6-7_GL0081591;7-5_GL0112816;8-1_GL0125340;G1-5A_GL0090444;G1-6A_GL0018306;Group2-1A_GL0085104;S-Fe20_GL0098308	231951	1902.81	221557	229227	NA	NA	NA	176765	NA	106568	NA	95755.1	93302.5	82140.7	105786			Q32NZ6	3654.32	4411.32	4459.25	4680.64	4577.76	5837.03	3842.87	4327.51	NA	6351.95	5416.74	NA	NA	NA	NA
11_GL0051060;6-7_GL0081591	13354	12921.1	14332.8	14343.8	14088.9	13288.7	13693.5	14467.9	14402.6	12854.8	16507	16059.6	13787.3	12310.1	14003.5			Q3TC72	1332.56	1299.48	944.725	1105.24	1028.05	927.919	NA	903.561	NA	NA	NA	NA	NA	NA	NA
1-1_GL0052409;1-1_GL0142365;34_GL0007329;4-2_GL0120044;4-8_GL0089667;7-1_GL0066484;7-6_GL0107477;Group2-5A_GL0014163;MH-6-3_GL0082285;S-Fe20_GL0189587	NA	NA	NA	9729.05	8280.99	9304.37	NA	9956.54	8937.88	5573.01	9020.12	6773.37	7703.69	NA	8973.07			Q3THE2	6372.83	7306.57	6609.5	9066.39	9363.82	9598.37	8730.04	9225.74	9164.6	9411.59	7979.75	9609.92	8591.62	8008.37	8932.27
1-1_GL0052409;S-Fe20_GL0189587	4428.23	4981.68	5007.91	6003.92	4763.67	NA	4414.75	4300.29	5336.97	NA	NA	NA	NA	NA	NA			Q3THS6	16927.6	17057.3	14875.3	12914	13145.3	11812.1	12384.2	13517.6	13816.1	11568.5	10959.2	11583.3	11996.3	13344.8	9090.01
11_GL0052465;11_GL0136326;11_GL0139332;2-1_GL0009422;3-8_GL0043860;4-5_GL0097286;54_GL0085487;6-6_GL0094383;8-2_GL0133656;G1-1A_GL0005457;G1-3A_GL0030227;MC-6-2_GL0185758;S-Fe2_GL0142646	16385.5	NA	16754.7	11237.9	10111.5	10002.1	9760.82	10479.1	11122.6	NA	10347.5	8666.56	9279.3	8151.35	8888.02			Q3TIW9	67581	57585.3	61715.1	61216.9	61216.4	62719.5	63132.9	70393.9	70026	83570.7	74392.3	NA	NA	NA	NA
11_GL0052465;11_GL0139332;2-1_GL0009422;4-5_GL0097286;54_GL0085487;8-2_GL0133656;G1-3A_GL0030227;S-Fe2_GL0142646	34805.8	32932.3	33047.1	34913.3	32868.5	32182.6	26238.1	32363.1	33164	25084.7	27408.5	27445.7	20340.2	22664	28462.2			Q3TMQ6	52356.7	55388.9	48467.1	59512.1	63304.6	62414.5	60242.9	57028.4	59359.9	48293.5	57618.4	49950.5	51032.5	54367.6	53098.6
11_GL0052465;11_GL0139332;4-5_GL0097286;54_GL0085487;8-2_GL0133656;S-Fe2_GL0142646	21330.7	21507.9	22398.5	26217.1	23698.5	22723.9	28592.9	26455.3	24332.4	23462.7	28311	22881.7	NA	29683.6	NA			Q3TTY0	35952.7	36155.1	36749.9	43065.6	41676.4	43869.1	40585	41993.4	42253.2	37991.4	38869.8	39966.2	35552.7	35418.8	37007.4
1-1_GL0052826	1552.38	1280.81	1472.88	1654.64	1167.81	1467.73	1818.44	1353.62	1510.39	NA	NA	NA	NA	NA	NA			Q3TTY5	92311.5	92809.5	92307.9	95786.9	100621	95339	101060	96964.3	99612.4	108673	108274	107321	105025	101645	108532
11_GL0052988;S-Fe12_GL0086995	3167.42	3444.24	2998.96	3940.46	2888.42	3647.91	NA	3107.66	2784.48	NA	2892.17	3986.89	NA	NA	NA			Q3TYQ9	5824.61	5888.18	6282.65	6590.25	6817.49	4047.61	4989.53	4927.8	5779.23	NA	NA	NA	NA	NA	NA
1-1_GL0053002;1A-dyr2-07_GL0038331;6-3_GL0019187;6-4_GL0111760;8-6_GL0092981;G1-5A_GL0031767	7042.13	NA	6053.99	9099.56	9389.13	8555.1	10039.9	9573.46	10957.3	NA	7081.71	7633.13	NA	8053.35	NA			Q3U0B3	6869.95	7471.86	7143.67	7879.24	8082.69	8784.81	7680.35	7845.1	8071.05	7324.58	7540.72	8902.56	NA	7531.23	NA
11_GL0053212	1563.2	1900.99	1375.86	2005.2	1482.07	2147.48	1281.91	1458.2	1504.31	NA	NA	NA	NA	NA	NA			Q3UM45	1444.77	1434.48	2096.3	NA	NA	NA	NA	NA	NA	NA	NA	NA	NA	NA	NA
11_GL0053215	4307.31	4663.01	4292.53	4693.03	4968.64	5283.57	4069.51	3901.76	4057.22	3374.52	3801.61	4120.8	6122.18	NA	4621.69			Q3UMC0;Q9D3R6	2837.17	3400.99	2693.5	NA	NA	3584.51	NA	2420.75	NA	NA	NA	NA	NA	NA	NA
1-1_GL0053280;1-1_GL0108808;20_GL0151793;Group2-7A_GL0109277;MH-0-4_GL0053297;MH-6-3_GL0045414;S-Fe7_GL0106544;S-Fe8_GL0182684	2606.06	2977.52	2243.35	18318.9	NA	NA	NA	NA	NA	NA	34318.4	NA	36141.8	34834.2	29495.1			Q3UMR5	NA	3003.55	3066.71	4299.17	4136.03	4238.78	3607.88	4209.79	3507.11	NA	NA	NA	NA	NA	NA
1-1_GL0053280;1-1_GL0108808;20_GL0151793;Group2-7A_GL0109277;MH-6-3_GL0045414;S-Fe7_GL0106544;S-Fe8_GL0182684	6737.04	6842.17	6696.77	5002.31	5692.32	5365.36	4212.76	4227.05	3151.26	3879.92	3726.14	2853.48	3485.46	2256.66	3656.44			Q3UNX5	3016.09	3157.64	2986.59	3126.49	3305.13	3107.14	2657.07	2815.16	3012.89	NA	2201.34	2760.96	4864.6	NA	NA
1-1_GL0053280;20_GL0151793;Group2-7A_GL0109277;S-Fe7_GL0106544;S-Fe8_GL0182684	5054.48	5186.77	4967.66	NA	4631.86	4139.35	4221.82	NA	NA	NA	NA	NA	NA	NA	NA			Q3UQ44	20155.6	20675.6	20288.3	17126.2	16577.9	18150.8	18767.6	18054.9	16164.2	15207.6	14627.3	NA	NA	NA	NA
11_GL0053374	48059.8	44970.7	44910.4	42892.6	37682.3	40814	43380.3	37215.9	42596.3	39744.1	42037.1	32089.1	34327.7	35696.2	37944.1			Q3UQ44;Q9JKF1	6310.49	6288.83	5444.84	NA	NA	NA	5262.65	4724.44	5199.92	NA	3479.78	NA	NA	NA	NA
11_GL0053374;1A-dyr4-07_GL0028776;6-3_GL0057956	15793.8	10146.7	9055.05	12617.2	10524.2	12970.6	9667.14	9239.34	9754	NA	NA	NA	NA	NA	NA			Q3UV17	129664	131462	133367	191053	187191	196368	196802	207867	197211	201865	211461	198850	191005	197063	202990
11_GL0053374;4-2_GL0084916;6-3_GL0057956;6-5_GL0061757;MH-6-1_GL0098937	NA	NA	NA	28126.2	14408.4	19941.2	NA	NA	NA	NA	NA	NA	NA	NA	NA			Q3UVK0	11488.7	11459	10697.7	11594.1	11906.6	10623.6	10925.8	10497.3	10383.8	9855.87	12447.6	9711.94	10764.8	9118.83	9644.21
11_GL0053374;6-3_GL0057956	88796	90795.7	85773.1	74893.2	73885.1	61930.6	84253.6	84280.3	93442.4	43680.1	48107.4	41587.5	59108.7	53139.8	56650.4			Q3UWA6	15737.6	15502.1	15105.2	13564.2	13781.1	14291.8	14566.2	13814.3	15133.8	14585	13351.8	11987.7	14292.5	10685.4	9943.36
1-1_GL0053884	4618.48	4578.92	4142.7	5492.14	5022.53	5488.04	5192.12	5472.15	4844.81	5438.78	5398.31	NA	7161.23	NA	6680.28			Q3UZZ4	4810.95	5100.3	4605.05	5770.84	6275.15	5157.97	5193.36	5626.76	4875.83	NA	NA	NA	NA	NA	NA
1-1_GL0053884;1-5_GL0075367	6650.45	6804.25	7117.94	7263.3	7861.8	6904.56	9480.47	8775.33	9414	3766.99	5702.26	NA	6509.85	7446.61	4780.01			Q3UZZ6	4599.08	4645.96	4543.62	7306.65	6799.78	NA	7637.62	NA	NA	7937.91	8393.14	10803.7	NA	NA	12482.1
1-1_GL0053884;1-5_GL0075367;G1-3A_GL0082802;G1-5A_GL0008678	22575.8	22365.8	20420	22641.6	21198.4	25394	18190.8	20439.8	19644.1	NA	18380.3	15713.4	19477.5	9336.87	13935			Q3V0K9	17637	17539.8	18045.4	18517.7	20202.2	20012.4	16683.8	18552.3	18672.1	17805.8	18766.8	18038.1	16544.9	15470	13080.4
1-1_GL0054161	4179.11	3749.82	3863.68	5545.44	5385.58	3809.48	5569.42	6291.18	3421.31	5316.16	4665.32	NA	NA	8287.73	NA			Q45VN2	1.01895e+06	1.10905e+06	919520	1.6949e+06	1.42746e+06	1.65289e+06	1.98164e+06	2.08606e+06	2.03481e+06	3.02537e+06	3.06062e+06	3.10175e+06	3.28777e+06	3.26462e+06	3.03956e+06
1-1_GL0054161;1-1_GL0073107;1-2_GL0115428;11_GL0021701;11_GL0139318;1A-dyr4-07_GL0090469;2A-dyr16-07_GL0057446;38_GL0043757;4-1_GL0011555;4-1_GL0057479;4-2_GL0077478;4-8_GL0028110;46_GL0035035;5-8_GL0048195;50_GL0015409;6-2_GL0055252;6-6_GL0043770;8_GL0053219;Group2-3A_GL0036528;Group2-4A_GL0041798;Group2-5A_GL0020455;MC-0-1_GL0029955;MC-6-1_GL0037649;MC-6-4_GL0074673;MC-6-5_GL0057260;S-Fe20_GL00…	NA	NA	NA	296151	304364	281645	362945	357102	368023	396280	368099	377895	407553	391637	427871			Q504N0	66714	57802.3	51772.4	55580.6	56748.3	58019.3	55523.2	55895.7	56363.2	38671.9	38465.3	35617.5	35785.4	34533	31108.2
1-1_GL0054161;1-1_GL0073107;1-2_GL0115428;23_GL0097013;38_GL0043757;4-1_GL0011555;4-1_GL0023341;4-1_GL0057479;4-8_GL0028110;50_GL0015409;Group2-5A_GL0020455;MC-0-3_GL0011860;MC-6-1_GL0037649;MH-6-4_GL0118888;S-Fe12_GL0213072	159763	132508	129658	143220	148501	145102	129884	133586	137937	104766	108981	103052	114262	107614	112639			Q571E4	8158.51	8605.73	8780.79	9727.53	9133.4	9162.11	10240.8	9777.67	9964.68	10018.1	9223.42	8672.89	8475.19	7793.52	8755.52
1-1_GL0054161;1-1_GL0073107;38_GL0043757;4-1_GL0057479;4-2_GL0077478;6-2_GL0055252;Group2-4A_GL0041798	36264.4	35950.2	41921.2	44621.4	42108.1	44843.6	44893.3	44774.9	41257.7	40589.2	49622.5	45485.4	38864.1	37884.9	30737.3			Q571I9	554.899	512.413	634.18	855.521	549.371	570.933	NA	NA	NA	NA	NA	NA	NA	NA	NA
1-1_GL0054161;1-2_GL0095419;1-2_GL0115428;1-7_GL0113738;2-3_GL0105804;38_GL0043757;4-1_GL0011555;4-1_GL0013487;4-8_GL0028110;Group2-1A_GL0059452;MC-6-1_GL0037649	76852.6	105165	83225.6	245200	229325	239145	NA	274121	273638	NA	NA	NA	NA	NA	NA			Q5BKQ4	25418.1	21295.1	21356.2	36819.6	37797.4	37218.8	35392.2	36143.8	36240.5	36677.7	46490.7	46198.1	40853.8	46316.4	45792.2
1-1_GL0054161;1-2_GL0095419;38_GL0043757;4-1_GL0011555;MC-6-1_GL0037649	4866.45	2274.81	4703.96	3894.22	3990.69	3907.06	4966.94	4558.58	4716.51	2811.08	4156.64	NA	NA	NA	NA			Q5FW60	10360.2	10281.8	9685.03	12192.3	12032.3	11513	NA	12768.6	11692	NA	NA	NA	NA	NA	NA
1-1_GL0054161;1-2_GL0115428;4-2_GL0077478;6-2_GL0055252;Group2-3A_GL0036528;Group2-5A_GL0020455	25868.5	26699.8	26831.7	21806.4	21354	18917.1	22685.3	20733.8	20661.1	11177.3	12582.4	9817.81	10587.9	8983.51	8854.43			Q5SSH7	12030.3	9746.64	11314.9	11425.3	10973.1	10328.4	10365.5	9541.24	9835.82	6487.58	6952.91	7556.71	6549.16	8609.13	8402.61
1-1_GL0054161;1-7_GL0113738;11_GL0139318;1A-dyr4-07_GL0090469;2-3_GL0105804;38_GL0043757;4-1_GL0057479;6-2_GL0055252;8_GL0053219;Group2-1A_GL0059452;Group2-4A_GL0041798;S-Fe20_GL0180068	135699	116491	140955	175355	158120	179565	166237	157123	162993	169381	161449	158775	176788	175231	166482			Q5SX40	NA	NA	NA	21641.2	17041.1	18553	18142.8	21217.9	22176.1	26631.7	23012.7	24813	NA	26415.5	NA
1-1_GL0054161;1-7_GL0113738;11_GL0139318;1A-dyr4-07_GL0090469;2-3_GL0105804;4-1_GL0011555;4-1_GL0057479;4-2_GL0077478;6-2_GL0055252;Group2-1A_GL0059452;Group2-3A_GL0036528;Group2-4A_GL0041798;Group2-5A_GL0020455;MC-6-1_GL0037649;S-Fe20_GL0089803;S-Fe20_GL0180068	23569.2	22343	19768.6	34554.9	36032.7	33117.7	34517.1	34599.1	37033.5	26461.6	27908.8	32724.4	28497.2	24818.1	24302.2			Q5SYD0	10425.6	9919.15	10612.8	11289.4	10966.1	11982.5	10796.6	11278.7	11122.2	10892.4	10376.6	10976.9	11274.6	11360.9	10751
1-1_GL0054161;38_GL0043757	7122.27	6164.55	6051.03	7836.85	7848.26	7023.34	6882.71	6675.51	5890.75	4615.73	6803.8	5952.18	NA	NA	NA			Q5XJY5	7395.89	5989.31	7527.93	6672.62	6643.47	6062.77	7761.2	6195.99	6993.35	5646.83	5081.72	6009.17	7810.61	6746.84	NA
1-1_GL0054161;38_GL0043757;4-1_GL0011555;4-1_GL0057479;MC-6-1_GL0037649	8564.3	10067.5	8615.88	8080.98	8742.78	8446.47	11372.2	11251.2	10402.3	10912.2	12668	10694.4	10355	13946	NA			Q60597	7415.31	7636.17	7714.63	9326.63	9974.34	9517.99	9670.59	9303.44	9531.91	8792.61	10339.3	10108.8	NA	10408.7	NA
1-1_GL0054161;38_GL0043757;4-1_GL0011555;MC-6-1_GL0037649	7590.27	7391.25	6908.8	NA	NA	NA	NA	NA	NA	NA	NA	NA	NA	NA	NA			Q60604	9515.38	9315.39	8847.76	9863.07	10460.4	9544.02	9483.97	9707.53	9600.48	9760.76	8888.74	8918.05	8926.17	8920.01	9771.72
1-1_GL0054742;S-Fe10_GL0031926	3499.47	3777.21	3982.93	3058.95	3309.93	3512.15	3487.66	3664.73	2785.19	3413.64	2978.59	3673.89	NA	4925.18	3585.55			Q60605	17293.4	15889.1	15749.9	15497.3	13938.5	13830.3	12936	12654.4	12028.8	14950	11725.1	12477.9	11292.2	13080.8	11154.9
1-1_GL0054810	10096.9	10009.9	10211.1	10117	9491.39	10177.2	10142.2	9150.22	9403.2	9669.71	8999.79	7582.35	9326.22	8268.93	9478.29			Q60648	NA	NA	NA	4983.72	5201.77	4398.02	4355.69	5583.99	NA	NA	NA	NA	NA	NA	NA
1-1_GL0054810;20_GL0054119	3104	NA	2935.98	NA	NA	4228.95	NA	6697.68	NA	NA	NA	NA	NA	NA	NA			Q60668	1774.92	NA	1923.34	1252.45	1212.46	1619.89	1723	1413.91	1219.72	1703.64	NA	NA	NA	2200.71	NA
11_GL0054940	3232.79	2789.17	2966.25	2199.1	NA	NA	NA	NA	1999.33	NA	NA	NA	NA	NA	NA			Q60692	15641.5	16579.1	16506	16052.6	16862.7	16721.9	14929	16794.4	16802.6	17263.4	15774.6	14133.7	16058.4	14629.7	13393.1
11_GL0055314	15609.5	16043.9	15913.6	16813.5	17059.6	17768.5	16438.5	17804.8	18176.9	18204.3	17356.4	17830	18241.8	19904	18126			Q60710	1524.25	1308.32	1365.56	1704.96	1796.44	1832.3	1516.53	1576.19	1394.2	1955.77	NA	NA	NA	NA	NA
11_GL0055324	12137.8	12781.7	12466.1	11966.5	12587.2	11265.2	11111.6	12255.9	13461	14648	15496	12265.3	12683.9	8685.48	19066.1			Q60737	1884.7	2029.54	1734.37	1939.79	1354.48	1603.83	NA	950.776	NA	NA	NA	NA	NA	NA	NA
1-1_GL0055364;1-1_GL0137106;1B-dyr12-07_GL0036906;3-4_GL0004010	5244.65	5036.22	4846.19	NA	NA	NA	NA	NA	NA	NA	NA	NA	NA	NA	NA			Q60854	370311	350644	355948	346323	357639	355879	350259	364221	359703	332500	334827	326065	348420	321652	325747
11_GL0055390	9981.9	10639	9449.23	18930.1	18943.3	19255.7	26202	27126.8	28905.8	29835.2	30591.2	29899.1	29723.3	34834.9	29982.8			Q60928	11908.5	12258.5	12048.8	12828.4	12060	11641.2	11407.3	11785.5	10904.6	10388.1	10077.2	10604.5	10265.6	9766.42	10025.5
11_GL0055516	1177.98	1257.19	1172.42	1129.33	1183.94	NA	NA	791.824	955.571	NA	NA	NA	NA	NA	NA			Q60930	86041.4	84546.8	84985.6	74464.1	72606.1	66990.7	70356.8	72372.9	72361.3	56956	55709.1	59198.6	56661.4	52465.3	62084.4
11_GL0055890	29331.1	29562.6	28696.3	30067.4	29732.2	30079.3	28360.1	29424.8	26154.5	28548.6	27730.4	30906.7	23748.3	29685.5	24411.9			Q60931	16835.6	16301.7	15937.9	13319.2	15543.9	15403.7	15561	17162.6	17144.2	12896.3	15271.4	14102.7	15466.9	13808.3	9597.89
11_GL0055890;Group2-8A_GL0161168;S-Fe20_GL0059760	52327.6	47745.4	54301.8	60114.6	56011.8	56502.2	52959.2	57855.7	60996.3	51697.9	56959.8	55675.1	55490.7	53706	59881.2			Q60932	35002.3	34950.9	35609	33801	34643.9	30876.2	33760	32902.1	32082.6	21050.7	25166.3	25246.7	20191.9	20863.7	24794.1
1-1_GL0056183	42157.1	40092.4	36694.9	78911.4	75929.2	75692.3	83062.3	85076.8	84529.3	80702.1	84222.6	84329.3	83163.9	85023.3	78485.1			Q60967	NA	NA	NA	NA	NA	3021.6	2499.5	675.802	NA	NA	NA	NA	NA	NA	NA
1-1_GL0056183;11_GL0121511;31_GL0073464;4-7_GL0021685;6-2_GL0081925;6-4_GL0007852;6-6_GL0108256;6-7_GL0098660;G1-1A_GL0104822;Group2-4A_GL0058042;Group2-7A_GL0140882;MH-6-5_GL0039873;S-Fe6_GL0098161;S-Fe9_GL0141162	93589	118832	70078.8	NA	NA	NA	NA	NA	NA	NA	NA	NA	NA	NA	NA			Q60994	2840.65	2640.87	2750.64	2434.59	2624.93	NA	2903.87	2296.39	2207.4	NA	NA	NA	NA	NA	NA
1-1_GL0056183;3-1_GL0097688;6-2_GL0061949	NA	NA	NA	261043	NA	245835	242573	238730	266198	NA	NA	NA	NA	NA	NA			Q60997	1.93195e+06	1.77809e+06	1.80849e+06	2.02239e+06	2.04635e+06	1.94236e+06	2.0721e+06	2.13554e+06	2.11591e+06	1.23539e+06	1.26583e+06	1.05823e+06	1.29931e+06	1.02643e+06	1.26848e+06
1-1_GL0056201;1-1_GL0096134;10_GL0063529;2-3_GL0101637	37574.4	61734.9	57320.3	57374.8	54344.6	55513.8	61348.1	61956.4	62466	57104.2	58817.3	56887.9	59184.6	60534.4	56222.6			Q61009	5409.56	5732.89	5340.42	6073.31	5477.16	6013.04	5355.97	5342.09	5700.58	NA	5981.31	4581.47	NA	NA	7511
1-1_GL0056201;2-3_GL0101637	14755.1	16048	15853.7	12033.5	12530.6	10990.6	12739.3	12284.1	10729.2	6274.54	7249.16	6339.45	7785.32	NA	NA			Q61035	5164.13	5368.39	5942.24	NA	NA	3960.04	NA	3353.94	NA	NA	5250.18	NA	NA	NA	NA
11_GL0057242	7305.1	7402.82	7391.06	7197.45	7610.4	7515.64	7186.89	6970.57	7473.98	7151.41	7128.09	6452.96	7576.22	6886.58	6896.87			Q61171	4613.42	5554.1	4292.1	7942.77	7213.62	8000.17	7666.77	7866.58	7859.53	6770.85	9845.15	9700.92	6136.52	6001.86	7813.1
11_GL0058639	27077.3	26975	25197.1	21533.2	19790.5	21173.1	22332.4	21288.9	23093.8	NA	NA	NA	NA	NA	NA			Q61247	1263.42	1360.65	1176.51	NA	1559.86	NA	1875.33	1582.22	1576.1	NA	NA	NA	NA	NA	NA
1-1_GL0058730;1-3_GL0039389;11_GL0016973;41_GL0109251;S-Fe2_GL0099699;S-Fe7_GL0035756;S-Fe8_GL0047884	1223.92	1109.33	1039.22	1080.69	1168.4	1127.14	1165.41	1110.91	1051.32	NA	NA	NA	NA	NA	NA			Q61316	1477.4	1345.21	1218.65	1310.06	NA	NA	NA	NA	NA	NA	NA	NA	NA	NA	NA
1-1_GL0058790	3942.47	4359.96	4332.66	4393.05	4508.73	4373	5571.26	5046.52	4072.3	NA	NA	NA	NA	NA	NA			Q61391	128027	119688	121951	120567	120070	123819	125143	131079	131186	111628	120286	117392	114626	102829	121332
11_GL0059124	20216.4	19363.7	18182.6	7564.35	11827.8	11240.5	17793.4	16492.4	16407.4	12220	10193	7307.71	14007.8	11319.5	9927.35			Q61398	2335.25	1884.22	1770.26	1258.12	1612.41	1659.85	NA	NA	NA	NA	NA	NA	NA	NA	NA
11_GL0059124;1_GL0086419;2-1_GL0009701;2-1_GL0024478;2-1_GL0066566;2-1_GL0121718;G1-5A_GL0071216;G1-5A_GL0190133	NA	NA	NA	8783.98	10237.4	8106.48	NA	NA	NA	NA	NA	NA	NA	NA	NA			Q61425	17860.5	18527.3	18177.3	21622	22311.3	22200.7	22175.6	23172.1	23069.7	23307.2	24607.1	27585.1	26032.8	23148	26384.3
11_GL0059124;1_GL0086419;2-1_GL0024478;2-1_GL0121718;3-5_GL0056574;4-2_GL0116016;5-1_GL0023970;8-5_GL0105757;G1-5A_GL0071216	32641.6	26972.4	28382.7	26333.9	24832	22123.4	21635.2	25134	27381.2	11716.5	12131.6	8312.11	9161.57	9523.98	11467.3			Q61503	19847.7	21676.4	20664.8	20419.6	19707.1	20802.3	19003.3	19289.7	20896.8	16991.7	18992	18871.7	18686.5	18135	19487.8
11_GL0059124;1_GL0086419;2-1_GL0024478;2-1_GL0121718;G1-5A_GL0071216	85261.9	81962.2	81737.1	149361	120953	94021.5	148852	NA	147427	NA	192296	NA	NA	NA	NA			Q61598	3761.61	3792.93	4197	3977.22	3444.12	3697.04	4440.51	4011.06	3795.48	3600.45	2879.16	3403.83	NA	NA	2350.72
11_GL0059124;1_GL0086419;2-1_GL0024478;G1-5A_GL0071216;G1-5A_GL0190133	NA	NA	NA	978.558	NA	NA	NA	NA	1498.53	NA	NA	NA	NA	NA	NA			Q61646	3989.28	4134.24	4263.44	4920.35	4697.69	5190.14	5183.23	4782.59	NA	NA	NA	7208.17	NA	NA	NA
11_GL0059124;2-1_GL0009701;2-1_GL0024478;2-1_GL0121718;G1-5A_GL0071216	53692.1	22266.9	38817.7	61992.2	54035.8	54631.1	51330.2	54791.6	53985.5	62807.7	66796.2	57094.4	71208.1	64662.5	66701.1			Q61656	1401.45	1314.25	1247.69	1468.34	1108.92	1664.07	NA	NA	NA	NA	NA	NA	NA	NA	NA
11_GL0059124;2-1_GL0024478;G1-5A_GL0071216	NA	2347.35	1902.04	4153.14	NA	NA	NA	4008.96	3409.25	NA	NA	NA	NA	NA	NA			Q61739	4038.51	4516.59	4428	5484.67	5239.34	5613.74	7298.07	6673.4	5674.22	NA	8729.47	6427.03	9042.28	9016.29	NA
11_GL0059124;G1-5A_GL0071216	4963.66	4983.97	5023.21	6607.9	6849.12	6642.08	6318.94	6854.48	6578.75	NA	NA	5808.45	NA	7412.26	NA			Q61765;Q61897;Q9D646	NA	5873.65	5267.35	5961.4	5362.58	5622.04	6121.33	NA	NA	NA	NA	NA	8441.85	NA	NA
11_GL0059162;Group2-1A_GL0088141	21296.8	22596	22368.8	24882.7	24979.4	25229	25106.7	22257.4	23325.8	20368.8	20708.8	22936.6	21687.4	20028.1	22999			Q61792	2349.46	2238.5	2778.59	4762.43	4208.79	3710.46	NA	5987.31	5404.24	NA	NA	NA	NA	NA	NA
1-1_GL0059506	6633.7	5273.4	6331.4	5550	5182.39	5151.76	5480.83	5761	5490.86	6992.47	NA	7156.79	NA	NA	4844.39			Q61838	8702.46	7459.37	7960.69	7632.58	7549.19	8293.62	7668.01	7597.67	8789.89	7855.42	7724.93	7188.23	10304.7	NA	9893.48
11_GL0059511	4663.94	4046.81	4245.27	NA	3468.07	NA	NA	NA	4433.57	NA	NA	NA	NA	NA	NA			Q61847	221438	210193	211679	219736	222530	223187	211076	212515	220345	196299	211050	192253	194597	202227	192034
1-1_GL0059664;2-1_GL0026444;2-1_GL0102347;2-8_GL0072129;8-8_GL0083723;S-Fe7_GL0053794	22551.9	25282.8	25691	NA	10657.9	NA	NA	NA	NA	NA	NA	NA	NA	NA	NA			Q61900	7151.45	8756.85	7897.43	6531.62	6623.76	6571.98	6457.12	5601.35	5364.97	5396.49	6866.94	NA	NA	5346.67	7520.96
1-1_GL0059664;6-2_GL0051646	4532.6	3281.45	5041.48	2620.05	3253.92	3953.29	3249.52	3526.97	4042.76	2962.24	NA	NA	NA	NA	NA			Q61937	6239.45	4954.14	5625.97	NA	NA	NA	NA	NA	NA	NA	NA	NA	NA	NA	NA
1-1_GL0060069	10493.3	10750.6	10721	10291.8	9908.5	10177.1	10546.3	10916.3	10612.5	10300.8	10698.4	10292.9	8464.3	8682.05	10251			Q62086	1654.16	NA	1628.44	1969.17	1943.72	1957.03	NA	NA	NA	NA	NA	NA	NA	NA	NA
1-1_GL0060069;11_GL0037479;S-Fe7_GL0276527	26907.4	30761.2	24636.7	35047.9	40446.2	35582.9	33573.5	43736.5	43986.4	NA	NA	NA	53595	NA	NA			Q62087	5971.54	6923.83	6082.47	5405.99	4918.58	5007.05	4808.38	4273.68	4459.47	3978.8	NA	NA	NA	NA	NA
1-1_GL0060070	11422	12348.6	12194.2	11087.1	10954.3	12016.3	11374.1	11595.5	10405	11602.4	10217.7	9552.88	9962.3	9528.81	12208			Q62093	NA	NA	NA	1371.44	NA	NA	NA	2015.15	2512.91	NA	NA	NA	NA	NA	NA
1-1_GL0060071	9110.96	8151.66	7939.91	7935.64	7986.52	8052.79	7636.7	8162.6	7710.78	8689.14	7087.62	8242.23	7250.23	NA	NA			Q62159	1490.92	1591.49	1930.32	1712.44	1733.39	1462.04	2129.46	1326.6	1322.39	NA	NA	NA	NA	NA	NA
11_GL0060737	25437.9	24262.4	24649.7	24708.1	23760.3	24026.4	23498.5	21703.7	23785.6	21233.2	19934.2	17476	19084.5	19269.8	18657.6			Q62159;Q9QUI0	2568.01	3373.83	3344	19422.8	18721.6	19656.2	23349.3	22667	24688.1	21415.3	21102.5	22710.9	21606.7	22753.2	20266.2
11_GL0060737;2-4_GL0063036;2-6_GL0065005	NA	5357.24	NA	11014.1	11270.2	11481.7	10816.3	10211.4	10915.2	6189.1	6412.79	8089.32	6848.2	9563.48	7424.38			Q62186	2874.06	3508.28	2836.94	2345.46	2712.04	2754.51	2367.28	2937.72	NA	2224.69	NA	NA	NA	NA	NA
11_GL0060737;47_GL0080996	24569.1	25169	24150.7	NA	45933.1	46129	NA	55580.8	NA	NA	NA	NA	NA	NA	NA			Q62261	4050.35	3810.6	3941.15	4418.62	4925.18	4964.01	5073.72	4773.08	4681.54	5232.27	NA	8127.76	6208.64	NA	NA
1-1_GL0061105	NA	NA	5610.76	NA	NA	NA	NA	NA	NA	NA	NA	NA	17990	NA	NA			Q62273	1016.53	786.029	1135.15	939.723	NA	NA	1602.12	836.444	NA	NA	NA	NA	NA	NA	NA
11_GL0061743	15317	14293.3	14882.9	14259.3	13691.7	13587.9	13550.3	14233.8	13820.4	12253	11939.7	11861.9	12293.7	11241.4	12986			Q62283	640.777	772.779	714.487	688.941	823.945	505.429	492.803	NA	875.634	NA	NA	NA	NA	NA	NA
11_GL0061773	1272.55	1115	NA	850.246	NA	797.977	NA	NA	NA	NA	NA	NA	NA	NA	NA			Q62395	34168.4	30153.4	34286	27530.2	27941.2	27258.9	24342.9	23969.7	25218.5	18290.3	21202.1	22547.7	19028.5	19602.7	24308.9
11_GL0061773;2-2_GL0129598;2-4_GL0006265;2-5_GL0020291;Group2-4A_GL0127595	11682.9	11412	11126.3	2883.69	1926	1246.64	NA	NA	NA	NA	NA	NA	NA	NA	NA			Q62425	2233.35	2546.63	2357.28	1901.34	2088.17	2496.5	NA	1646.03	1771.55	NA	NA	NA	NA	NA	NA
11_GL0061773;2-7_GL0101884;26_GL0091341;4-2_GL0037945;4-7_GL0134167;Group2-3A_GL0023648;S-Fe18_GL0004478	34958	32921.3	41649.2	53429.6	40300	53809.1	39526.5	36660.7	36095.8	NA	NA	NA	NA	NA	NA			Q62465	2738.07	2672.12	2730.29	1941.96	2027.5	2077.4	2482.17	2426.93	2517.83	NA	NA	NA	NA	NA	NA
11_GL0062566	10364.7	16781.6	8996.32	23291	23599.6	22376.1	26474.8	26730.3	23452.3	66860.3	66359.5	66900.7	70635.6	74113.3	72731.4			Q62468	49530.7	48436.2	47829	46123.4	46109.4	46985	49350.6	47818.3	48044.4	44584	41093.4	42873.4	42681.5	43059.6	45229.8
11_GL0062567	7115.49	7995.26	8095.59	12783	14059.3	12796.8	14219	15403.3	14942.2	14978	14445.2	14528.3	14159.2	16377.6	20688.3			Q62469	2236.78	2053.14	2085.02	2620.77	1802.41	2293.44	NA	1978.37	1460.84	NA	NA	NA	NA	NA	NA
11_GL0062568	4705.88	4692.48	5009.21	4863.29	4529.35	4294.18	5000.9	4332.45	4606.44	3610.1	3864.79	NA	2218	NA	NA			Q62470	4137.46	5161.21	5383.29	6331.14	7033.18	6647.97	6150.23	6745.21	6813	6252.54	8731.72	6592.76	NA	8516.06	16087.6
11_GL0062569	22174.2	22137.1	22217.3	21650.9	21652.7	21271	20178.3	21442.8	19884.1	17119.1	19316.4	21881.1	25371.2	18897	23681.6			Q62471	15452.4	18852.9	18429.4	20509.3	21562.5	21321.9	20691.1	21740	20104.8	20757	22263.2	19935.5	16170.7	16547.9	18303.6
11_GL0062569;S-Fe20_GL0122475	5127.86	6274.57	5833.72	17232	15355.7	14986.1	15979.1	15576.5	15500.9	17256.9	15431	16891.4	17083.5	14583	16068.6			Q63739	2645.57	2632.69	2891.05	NA	NA	NA	NA	NA	NA	NA	NA	NA	NA	NA	NA
11_GL0062770	15602.8	16125.8	15462.4	14981.7	14705.7	14148.2	14380.1	14963.2	14443.2	9471.01	9989.88	9159.17	10503.5	10179.2	11779.9			Q63844	2391.73	2248.32	2263.46	NA	NA	NA	7446.06	8434.33	NA	NA	NA	NA	NA	NA	NA
11_GL0062779;11_GL0122981	10168.9	10080.4	9906.05	11260.6	10283.2	13750.8	10255.5	12661.8	14172.3	12791.9	10903.7	9103.5	8001.33	6374.5	7915.6			Q63886	8143.92	7214.78	7268.05	8342.23	9719.66	9190.22	9354.05	8369.31	9395.05	9438.2	8835.44	9702.19	10255	NA	8980.9
11_GL0062779;11_GL0122981;8-3_GL0048164	21235.5	20200.7	20691.5	20761.3	20278.2	19101.8	20688.6	21815.1	20277.7	15851	16345.8	16275.9	12941.4	14451.6	14591.4			Q63886;Q64435;Q6ZQM8	43599.7	40669.1	41105.6	44306.6	34821.2	39802.1	NA	44257.9	47524.9	NA	NA	NA	NA	NA	NA
1-1_GL0063097	21730.8	16110.3	22697.9	15325.8	15247.4	14069.3	14833.5	15806.8	16985.3	12507.7	7792.28	15672.6	15159.5	14686	15027.5			Q64133	31808.3	34015.6	30888.2	46718.4	45711.4	45447.5	43297.1	41532.6	45845.2	43455.4	42813.5	40527.5	39391.6	36346.1	38291.2
1-1_GL0063097;2-1_GL0122637;4-1_GL0013931;7-1_GL0053961;G1-5A_GL0015335	29107.5	35023.3	27956.3	40941.5	40729.3	43521.2	40434.1	34301.3	40307.5	30485.1	36237.2	35325.1	36012.9	32949.1	32518.7			Q64191	NA	2242.26	2655.1	NA	NA	NA	NA	NA	NA	NA	NA	NA	NA	NA	NA
11_GL0063254	7751.64	8784.31	8022.57	11755.6	10525.1	12167.5	13329.9	12491.5	14139.9	NA	NA	NA	NA	NA	NA			Q64277	10522.6	10279.9	10991.7	10249	11022.6	10954.5	11886.5	8863.11	9865.48	6970.94	NA	7089.39	NA	NA	NA
11_GL0063254;11_GL0095770	16503.1	16731	16217	25067.2	26792.9	24905.8	22607.2	23443	21943.1	21063.5	20794.6	21015.6	20003.8	22446.3	18082.9			Q64285	12149.7	13193.3	13945.2	12425	11003.3	13181.8	12513.2	11664.2	11070.5	7578.61	9658.53	8969.95	8482.68	8460.43	6794.26
11_GL0063269	11232.8	11420.3	10186.6	11140.4	9433.44	10854.6	10801.6	10290.3	9342.34	11636	11063.6	9733.76	NA	10526.2	8784.66			Q64299	11751	11443.8	11204.7	11990.9	12182	10617.9	13004.6	12286.7	11825.6	11395.5	10546.1	11740.3	10936.9	8323.13	10094.2
11_GL0063269;14_GL0085272;2_GL0075727;3-5_GL0021064;5-3_GL0000335;7-4_GL0131624;7-5_GL0057901;S-Fe20_GL0054133	51214.5	50963.3	45602	63562.7	58914.2	59889.1	56630.2	60166	61090	49188.7	46614.5	42021.5	54047.7	49060.8	45238			Q64310	1101.87	1019.85	NA	NA	NA	NA	NA	NA	NA	NA	NA	NA	NA	NA	NA
11_GL0063269;5-3_GL0000335	14519.1	12645	12820.3	9071.05	10038.5	9061.83	NA	10351.1	9566.53	NA	NA	NA	NA	NA	NA			Q64331	2557.7	2813.48	2967.71	4407.1	3547.18	4687.38	NA	NA	NA	NA	NA	NA	NA	NA	NA
1-1_GL0063435;3-3_GL0108964	9277.11	8381.65	10232.1	7156.11	7546.69	5852.9	6099.95	6563.78	6107.15	NA	NA	NA	NA	NA	NA			Q64374	4950.87	5385.32	5063.7	5509.66	5351.11	5419.43	5469.24	5115.75	5436.07	4683.72	5757.17	5023.84	5316.18	6572.8	4373.24
1-1_GL0063435;3-3_GL0108964;7-1_GL0023155	49917.1	49152.3	50168.1	45106.4	49074.9	46569.5	44783.2	46820.9	46937.9	48691.9	52981.3	49371.2	45243	43380.5	NA			Q64433	10097.5	9450.89	13437.5	12256.8	11764.2	11840.1	10435.3	11850.1	12066.5	15065.3	14397.8	12721.2	11419.6	10670.3	12166.3
11_GL0063592	5734.46	6063.85	5140.15	4844.22	5895.9	4709.11	6045.03	4401.2	5155.11	4119.27	NA	3156.24	NA	NA	NA			Q64435	1573.37	NA	1703.97	NA	NA	NA	NA	NA	NA	NA	NA	NA	NA	NA	NA
1-1_GL0063993	NA	12925	13078.6	9610.56	NA	9177.7	7820.21	8510.6	8912.13	5841.72	7127.81	6630.89	6245.98	6117.18	6570.16			Q64442	4095.84	3981.25	4333.66	4140.51	4127.99	3867.89	3787.57	3247.69	4406.3	NA	NA	NA	NA	NA	5058.7
1-1_GL0063993;3-3_GL0011641;4-3_GL0091638;4-8_GL0074077;7-1_GL0074936;7-4_GL0098846;G1-5A_GL0012887;G1-8A_GL0052900;Group2-5A_GL0107794;MC-6-1_GL0089287;S-Fe17_GL0013609;S-Fe7_GL0210999	94245.4	93239	90017.2	92862.8	93112.9	90023.9	92740.3	89028	91804.3	80990.5	85893.1	84853.1	81170.3	93954.8	94347.2			Q64444	31678.2	31938	32018.8	26495.7	28171.3	27456.2	31450.5	30163.8	31403.7	31845.3	31545.8	28929.4	28708.6	23457	29841.1
1-1_GL0063995	3572.5	3574.34	4292.9	4071.82	3784.84	4560.83	3570.84	3409.07	3131.86	3708.86	2988.17	3316.18	3852.75	2747.85	1923.39			Q64455	1549.6	1682.65	1824.74	1388.39	1876.9	1399.58	1478.32	NA	1354.02	NA	NA	NA	NA	NA	NA
1-1_GL0063995;1-2_GL0070352	6593.44	6324.84	3668.73	11684.4	11951.9	10934.6	11526.4	NA	13317.9	12802.7	NA	12909.4	12921.2	12647.8	NA			Q64464	1162.84	1415.07	1670.16	NA	1919.74	1229.2	NA	1356.62	1506.64	NA	NA	NA	NA	NA	NA
1-1_GL0063995;1-2_GL0070352;2-1_GL0004685;2-1_GL0050430;2-1_GL0121740;2-2_GL0073397;2-3_GL0002271;4-1_GL0074517;4-8_GL0123191;5-1_GL0071199;Group2-8A_GL0063593	17348	21798.6	19350.3	46520.2	44858.5	38352.7	46511.8	50054.5	50930.1	50193.2	48449.8	46454.1	50539.6	48388	56992			Q64467	64180	57160.7	62477.4	96624.8	83791.9	89607	84382	86085.2	90200	79259.5	81154.5	68742.1	78972.5	82125.6	75893.7
1-1_GL0063995;2-1_GL0121740;2-2_GL0073397;2-3_GL0002271;4-8_GL0123191;5-1_GL0071199	7591.87	6955.42	7531.96	6932.82	6543.3	6315.84	9096.06	7437.99	7644.52	10884.2	10563.3	8404.22	10813	11305.6	13470.7			Q64514	NA	1132.83	NA	1196.26	NA	1389.32	1499.55	NA	1309.95	NA	NA	NA	NA	NA	NA
1-1_GL0063995;2-2_GL0073397	9368.85	7819.95	9213.55	5680.8	5278.62	5329.16	4395.09	5180.24	4043.97	4087.63	3975.47	4228.84	3439.53	4601.64	3977.32			Q64516	5010.73	5945.67	4272.14	5486.79	5499.98	5789.64	6423.02	6688.92	6443.24	5806.23	6301.27	7408.16	10957.5	NA	NA
1-1_GL0063995;2-2_GL0073397;5-1_GL0071199	7250.11	6647.75	7636.67	9760.24	9709.98	10748.5	9099.86	8716.19	9862.24	11356	9214.16	7629.86	5642.49	NA	8365.24			Q64518	2930.64	3068.24	3040.2	3427.44	3227.88	3176.39	3260.32	3548.43	3583.15	3386.57	2132.85	3084.67	NA	NA	NA
1-1_GL0063995;5-1_GL0071199;Group2-8A_GL0063593	13043.2	11439.5	12582.7	13764.8	14521.7	13793.1	14426	14849.2	17187.7	15981.1	NA	14388.8	14615.4	18536.3	15374.4			Q64521	28706.4	28800.6	29180.6	25299.3	25395.3	23849.1	25213.8	25491.6	25397.8	22459	25286.7	23108.5	23599.4	23615.9	25856.7
1-1_GL0064280	3680.21	3149.84	3055.56	2065.9	2528.61	2254.3	2292.13	2223.1	1838.31	NA	1281.75	2786.14	NA	NA	NA			Q64523;Q6GSS7	4605.41	4928.91	4181.95	NA	NA	NA	NA	NA	NA	NA	NA	NA	NA	NA	NA
1-1_GL0064280;38_GL0032027	16582.3	18353.9	17749.7	17911.8	18045.7	19157.7	19285.2	17969.3	18891.7	20069.2	18620.9	19635.1	18700.7	19409.2	20478.4			Q64524;Q8CGP0;Q9D2U9	NA	2733.5	NA	6326.79	NA	NA	NA	NA	NA	NA	NA	NA	NA	NA	NA
1-1_GL0064345	6124.6	6282.96	6302.07	7506.72	7039.69	6847.82	7293.13	7460.26	7227.37	8624.41	NA	8931.79	10655.3	8096.78	10575.5			Q64669	2306.79	2672.96	2670.44	2358.58	NA	2287.96	2876.79	1837.36	NA	NA	NA	NA	NA	NA	NA
1-1_GL0064345;3-1_GL0094038;32_GL0061905;5-6_GL0001048;MH-6-3_GL0063230	34726.3	37897.2	38966.7	48332.8	46497.8	47129.8	47257.8	44486.9	48084.4	45881.2	43300.5	47640.5	41789.9	44445.8	45617			Q64727	2659.91	2292.11	2642.93	3402.31	2948.98	3712.61	2986.31	2700.77	2730.68	3090.25	3061.63	2207.52	2405.05	NA	NA
1-1_GL0064345;32_GL0061905;MH-6-3_GL0063230	3446.99	3740.18	3808.71	2632.25	2402.37	3044.93	2729.18	2690.63	2151.08	NA	NA	NA	928.245	NA	NA			Q68FD5	7702.24	7595.99	7988.15	7773.01	7892.72	7878.28	7855.71	7456.64	7203.73	5399.27	5731.43	6863.08	NA	4998.68	7176.21
1-1_GL0064871	2030.12	1873.5	1822.04	1276.87	1309.23	1251.16	NA	1283.83	1408.7	NA	NA	NA	NA	NA	11318.9			Q68FL4	9387.6	8531.73	8484.12	9012.91	8647.8	9142.06	8378.91	8641.67	9211.04	19012.9	29378	43817.1	10691.9	23974.2	NA
1-1_GL0064871;MH-6-3_GL0024150	6261.67	9242.17	9416.45	13520	12908	12537.4	11916.7	12801.6	11533.4	12073.6	12921.3	11383.7	NA	11791.8	9538.03			Q69ZF7	3375.4	3781.77	2922.99	3700.85	3056.55	3313.68	4345.79	4633.9	4260.52	5276.51	NA	NA	NA	NA	NA
1-1_GL0065399	8336.34	9012.37	8816.56	8624.9	7932.98	8583.5	7700.69	7999.11	8651.81	4913.92	6166.53	6199.15	4746.56	6154.47	6933.31			Q6DYE8	171373	152095	167924	143000	146613	145875	153383	156242	150164	96985.5	88000.3	96744.1	105899	90331.9	108345
1-1_GL0065399;1A-dyr4-07_GL0047701	2049.92	2633.76	2027.1	2336.95	1819.1	1461.6	1662.27	2132.44	1435.1	NA	NA	NA	1813.53	NA	NA			Q6IFX2	7437.63	7500.83	6920.52	8771.98	8851.1	9226.68	7456.66	7196.93	7227.04	8099.16	5429.71	11621	5078.84	NA	NA
1-1_GL0065399;22_GL0066268;6-6_GL0013485;7-1_GL0048475;G1-5A_GL0201828;MC-6-1_GL0084390	NA	2873.41	NA	NA	NA	NA	NA	NA	NA	NA	NA	NA	NA	NA	NA			Q6IME9	1223.79	1794.79	1294.64	2345.78	NA	1398.37	NA	NA	NA	NA	NA	NA	NA	NA	NA
1-1_GL0065399;22_GL0066268;G1-5A_GL0201828	9820.07	8924.76	9487.78	10882.2	9172.34	10529	11856.1	10358.3	12387.6	10157.3	7267.81	9741.61	8778.22	7185.24	10611.7			Q6NSR8	9274.58	10088.4	9669.83	9819.5	10109.6	9981.59	10033	9744.24	9549.81	9368.21	8296.58	9353.04	10588.2	9206.15	7845.13
11_GL0065633;17_GL0127899;1A-dyr2-07_GL0000594;1A-dyr4-07_GL0054230;2-1_GL0005243;2-3_GL0103226;2-8_GL0109886;20_GL0105798;26_GL0078522;28_GL0045891;3-3_GL0100994;3B-dyr36-06_GL0050063;4-1_GL0062101;4-1_GL0079690;4-3_GL0017430;4-7_GL0128250;5-4_GL0107661;5-7_GL0142112;5-8_GL0008035;5_GL0062237;6-1_GL0015324;6-4_GL0092622;8-2_GL0127477;Group2-3A_GL0019446;Group2-3A_GL0187614;Group2-8A_GL0097207;MC…	225892	247871	310354	NA	NA	NA	NA	NA	NA	NA	NA	NA	NA	NA	NA			Q6P069	12479.4	12250.9	12785.6	14276.1	14554.8	13997.9	13831.7	14977.6	13567.1	14131.4	13825.8	12951.4	13199.6	13725.8	12695.5
11_GL0065633;17_GL0127899;5-4_GL0107661;MH-6-3_GL0027943;MH-6-5_GL0115821;S-Fe12_GL0083056	6756.99	5242.38	4339.3	NA	NA	NA	NA	NA	17293	NA	NA	NA	NA	NA	NA			Q6P1B1	1992.39	2191.46	2282.75	3473.79	3293.77	3276.51	3641.42	3164.78	3133.95	4546.44	4395.08	NA	NA	NA	NA
11_GL0065633;17_GL0127899;5-4_GL0107661;MH-6-5_GL0115821;S-Fe12_GL0083056	30832.4	30228.3	30362.2	30587.1	29151.4	30571	29916.9	27219.2	28380.1	27101.3	26515.8	27852.9	25037.6	25507.5	27776.5			Q6P8U6	780407	715074	744270	696940	672071	559466	660666	649908	635800	345228	342007	283927	375084	291513	326191
11_GL0065633;5-4_GL0107661	8658.33	9464.45	9764.05	13260.6	12427.7	14218.6	14325	14019.2	15047.7	10315.4	9952.15	7719.62	7766.23	9751.63	8797.23			Q6PB66	1223.43	1185.1	1143.03	1279.68	NA	933.944	NA	1641.7	NA	NA	NA	NA	NA	NA	NA
11_GL0065633;5-4_GL0107661;MH-6-5_GL0115821	NA	NA	NA	7595.46	7788.63	7641.73	5985.33	9077.55	6596.81	NA	NA	NA	NA	NA	NA			Q6PDN3	5031.28	5428.16	4681.02	11473.1	11999.2	12440.7	NA	13014.3	12486.7	NA	NA	NA	NA	NA	NA
11_GL0065713	5105.11	4623.19	5045.88	6661.91	4574.27	4781.93	4244.27	4127.22	6753.05	4625.05	NA	5400.84	NA	NA	3241.53			Q6PHZ2	5592.58	5722.88	4817.44	5457.72	5844.54	6009.22	5036.9	5685.86	4889.32	6182.81	6893.35	6651.52	NA	NA	5737.09
11_GL0065713;11_GL0158489;1A-dyr4-07_GL0023556;2-2_GL0089776;20_GL0048707;3-5_GL0119887;4-7_GL0031370;5-1_GL0077814;Group2-3A_GL0100863;S-Fe20_GL0144264;S-Fe2_GL0032219	8832.23	6976.14	14951.6	14756.9	10907.7	12197.5	12487.3	9341.21	9684.03	11150.1	10699.8	11348.1	NA	NA	NA			Q6PZE0	16635.9	17806.4	17562	16119.9	15905.8	16295.6	16672.7	15759.7	15667	15107.9	14349.8	13610.8	14786.2	15372.4	15405.4
11_GL0065713;11_GL0158489;1A-dyr4-07_GL0023556;3-5_GL0119887;4-1_GL0033101;7-5_GL0099918;8-2_GL0142115;Group2-3A_GL0100863	89722.7	80287.4	81751.1	92750.6	92884.4	87331	101436	98619.5	110993	103049	99485.8	104893	113525	109656	94808.4			Q6Q473	219626	198111	199748	261833	271094	268171	253808	267916	259880	241631	242629	240193	253406	228136	234468
11_GL0065713;11_GL0158489;3-5_GL0119887;4-7_GL0031370;6-2_GL0059797;S-Fe20_GL0144264;S-Fe2_GL0032219	6584.11	6268.32	6392.85	5697.55	5158.65	3603.64	4048.46	5330.9	5810.17	NA	NA	NA	NA	NA	NA			Q6T3U4	21084.8	20385.6	20202.8	22713.9	22182.5	21746.2	22043.5	23038.2	22109.5	22722.7	20979	21555.2	20058.7	22833.7	19126.2
11_GL0065713;1A-dyr4-07_GL0023556;2-1_GL0009313;2-1_GL0052084;2-1_GL0052682;2-5_GL0003928;3-5_GL0119887;4-7_GL0031370;6-5_GL0030705;Group2-3A_GL0080538;Group2-3A_GL0100863;MC-6-2_GL0015820;S-Fe20_GL0144264;S-Fe2_GL0032219	25479.9	24323.7	21394.3	20218.4	18247.2	16344.3	20845.8	22661.1	20713.1	9870.48	11103.5	6937.45	12294.2	12421.5	8931.87			Q6UGQ3	2371.9	2851.15	2511.06	2424.2	3048.16	2354.23	2502.92	2963.75	NA	NA	NA	NA	NA	NA	NA
11_GL0065713;1A-dyr4-07_GL0023556;3-5_GL0119887;Group2-3A_GL0100863	24659.7	23429.8	24910.7	21200.2	21041.3	18053.5	25327.9	20222.6	22018.8	14547.8	10707.5	8681.05	10722	10782.7	11693.5			Q6URW6	9570.08	10208.5	9954.16	9440.49	9357.03	9465.12	9733.17	9894.79	9161.52	9026.56	8781.05	8640.29	9904.08	6898.44	9149.28
11_GL0065713;1A-dyr5-06_GL0045551;2-1_GL0009313;2-1_GL0052084;2-2_GL0145679;2-5_GL0003928;3-5_GL0119887;4-1_GL0033101;4-7_GL0031370;5-1_GL0077814;6-4_GL0013979;6-4_GL0029542;7-5_GL0099918;8-2_GL0142115;G1-6A_GL0060704;Group2-3A_GL0080538;MC-6-2_GL0015820;MC-6-2_GL0106506;S-Fe20_GL0144264;S-Fe2_GL0016289;S-Fe2_GL0032219;S-Fe9_GL0205600	277639	257978	258087	311306	329849	323833	305780	284369	323471	309730	343548	311117	293129	267399	257111			Q6URW6;Q8VDD5	NA	NA	NA	NA	5629.19	5063.69	7178.73	6887.68	7836.92	NA	NA	NA	NA	NA	NA
11_GL0065713;3-5_GL0119887;4-7_GL0031370;5-1_GL0077814;Group2-3A_GL0080538;S-Fe20_GL0144264;S-Fe2_GL0016289;S-Fe2_GL0032219	NA	NA	NA	13822.6	14019.6	11392.1	10958.2	11999.9	11362.7	NA	NA	NA	NA	NA	NA			Q6X893	3571.97	4122.4	4215.59	4020.22	4971.67	4152.02	3257.76	NA	4931.16	NA	NA	NA	NA	NA	NA
11_GL0065713;3-5_GL0119887;4-7_GL0031370;S-Fe20_GL0144264;S-Fe2_GL0032219	43069.9	43556.9	44162.9	52249.8	53238.2	53242.8	50698.9	47803.6	48423.8	51361	45375.4	45495.5	49178	50613.9	48310.4			Q6ZQI3	8511.56	10837.4	9490.89	14059.6	14213.9	14287.1	14628	13857.4	12283.8	14239.4	11855.5	18840.5	10439.5	11521.7	10390.3
11_GL0065713;3-5_GL0119887;S-Fe2_GL0032219	36208.9	29541.4	32333.1	53502.5	50891.7	51133.9	52322.3	55923.5	52487.5	52033.6	NA	49822.7	NA	48628.9	50364.5			Q6ZQM8	19473	18978.8	19972	14873.7	15003.6	14823.5	12715.2	11694.8	12307.3	12576.2	12167.6	11932.9	11028.1	9977.22	9026.17
11_GL0066546	4894.5	5299.18	5261.07	5049.17	4946.32	4947.24	5554.12	4562.52	5244.63	7011.64	5110.31	5282.9	NA	6172.69	5520.43			Q6ZWN5	5207.91	5244.41	4731.81	8558.42	7808.97	8164.66	9073.1	9477.99	9698.85	11680.5	10751.8	10414.6	10196.5	NA	11648.4
1-1_GL0066548	1998.66	NA	NA	1904.23	1555.38	NA	NA	NA	NA	NA	NA	NA	NA	NA	NA			Q6ZWU9;Q6ZWY3	12548.4	12785.2	13272.3	12628.5	10055.1	12641.7	12610.6	12214.9	NA	NA	NA	NA	9397.66	NA	NA
1-1_GL0066548;1-2_GL0129635;2-2_GL0030376;3-2_GL0004470;5-6_GL0078041;7-6_GL0110443;G1-5A_GL0169212;Group2-3A_GL0175727;S-Fe6_GL0031332;S-Fe9_GL0026444	64875	60622.3	62152.6	63659.9	69439.7	63107.8	75654.8	75659	71526.3	80231.9	80706.8	79520.7	74595.5	76490.4	82185.6			Q6ZWV3	13786.3	14902.1	15470.5	NA	14743.8	NA	14393	12377.1	12696.6	NA	NA	NA	NA	NA	NA
1-1_GL0066548;5-8_GL0137451;6-3_GL0047309	NA	NA	NA	NA	NA	NA	56039.5	56085.2	55452.3	54775.1	55365.9	57272.2	47181.1	53905.4	50287.2			Q6ZWV7	NA	4985.23	NA	21179	22630.6	22335.1	NA	13648.5	12305.4	9278.93	10901	12374.7	11591.1	9182.12	11021.1
1-1_GL0066932;1-1_GL0083048;1-1_GL0095104;17_GL0105836;20_GL0029051;20_GL0163715;2_GL0125294;35_GL0136148;4-3_GL0039646;5-5_GL0065367;5-8_GL0139456;MH-6-2_GL0012694;MH-6-2_GL0028666;MH-6-3_GL0042795;MH-6-5_GL0099912;MH-6-5_GL0136824;MH-6-5_GL0183530;S-Fe2_GL0026209	14843.5	15961.2	15508.5	18323.1	18225.3	17836.5	18145.3	23194.4	17968	23646.5	24338.2	16994.7	17934	19992.2	25157.8			Q6ZWX6	2343.51	2633.47	2079.75	3132.38	3049.99	2826.45	2981.14	3244.42	3343.75	NA	NA	NA	NA	NA	NA
1-1_GL0066932;1-1_GL0083048;17_GL0105836;20_GL0029051;20_GL0163715;G1-3A_GL0041449;G1-3A_GL0131986;MH-6-5_GL0099912;S-Fe2_GL0026209;S-Fe2_GL0171473;S-Fe2_GL0195698	216949	NA	NA	312793	294971	302484	278322	278223	291790	202777	172058	183336	220095	245100	221759			Q76MZ3	3718.96	4113.55	3427.75	4171.14	3757.64	3631.31	3384.95	4019.51	3947.31	NA	NA	NA	NA	NA	NA
1-1_GL0066932;1-1_GL0083048;20_GL0163715;23_GL0130307;29_GL0067888;35_GL0136148;4-2_GL0053150;4-3_GL0039646;5-7_GL0133472;6-5_GL0134330;7-8_GL0038775;MH-6-4_GL0095022;S-Fe20_GL0101053;S-Fe3_GL0215405;S-Fe7_GL0084033	65315.2	54837.4	53007.7	48318.3	50271.8	48811.1	45818.8	45024.4	46057.9	39804.1	34521.6	28175.9	37884.3	24141.5	39393			Q78IK4	1798.96	2151.62	2110.95	1871.3	1979.88	1840.27	1782.44	2294.32	1812.77	NA	NA	NA	NA	NA	NA
1-1_GL0066932;1-1_GL0095104;1-1_GL0128445;1-3_GL0102532;1-7_GL0127377;14_GL0118271;17_GL0105836;17_GL0160550;1A-dyr4-07_GL0057123;20_GL0029051;20_GL0163715;22_GL0076169;23_GL0079503;29_GL0067888;35_GL0136148;4-1_GL0069044;4-2_GL0053150;4-3_GL0039646;5-5_GL0075629;5-8_GL0061093;5-8_GL0139456;6-3_GL0103114;6-5_GL0134330;7-4_GL0099193;7-5_GL0007166;7-5_GL0115577;G1-5A_GL0036391;Group2-4A_GL0009226;M…	149913	181052	117602	317048	323414	303767	318320	337613	348189	302552	318615	337910	297989	306291	269462			Q78IQ7	28062.4	28928.5	28506.5	25030	24477.5	23748.5	25959.4	22693.9	22174	21781.9	17938.9	21003.7	NA	19209.6	22009.8
1-1_GL0066932;17_GL0160550;20_GL0163715;23_GL0130307	120843	117237	113937	232158	241859	219137	NA	247600	259015	NA	NA	NA	NA	NA	NA			Q78ZA7	1914.31	1405.06	1532.44	NA	NA	NA	NA	NA	2746.27	NA	NA	NA	NA	NA	NA
1-1_GL0066932;17_GL0160550;20_GL0163715;5-7_GL0133472;7-8_GL0038775;G1-3A_GL0041147;G1-3A_GL0041449;MC-0-1_GL0098029;MH-6-3_GL0042795;S-Fe2_GL0171473;S-Fe2_GL0195698	1165.93	1205.34	1107.58	NA	867.423	638.159	NA	NA	NA	NA	NA	NA	NA	NA	NA			Q791V5	5474.75	5865.17	5845.64	8719.61	8804.38	9546.64	NA	NA	NA	NA	NA	NA	NA	NA	NA
1-1_GL0066932;20_GL0163715	4929.46	5119.25	5544.4	NA	4849.59	NA	NA	NA	NA	NA	NA	NA	NA	NA	NA			Q7M758	358415	327390	322995	309742	313037	302879	303217	295782	322703	245259	248526	208283	249927	246586	223024
1-1_GL0066932;20_GL0163715;35_GL0136148;4-2_GL0053150;5-5_GL0065367;7-8_GL0038775;S-Fe2_GL0195698;S-Fe3_GL0215405	260781	248057	260114	227139	230283	238175	216508	220166	224119	222366	NA	214950	231542	217031	219209			Q7TMF3	2372.27	1986.63	2194.45	NA	NA	NA	NA	2952.98	NA	NA	NA	NA	NA	NA	NA
1-1_GL0067006	5089.44	5623.93	5501.24	NA	NA	NA	NA	NA	NA	NA	NA	NA	NA	NA	NA			Q7TMR0	4728.07	4937.49	5385.86	4547.09	4154.51	4817.62	4418.91	5682.12	4646.99	4649.3	NA	NA	NA	NA	NA
1-1_GL0067006;1-1_GL0120486;7-1_GL0071761	10265.1	11108	10705.9	NA	NA	NA	NA	NA	NA	NA	NA	NA	NA	NA	NA			Q7TMS5	4507.45	4759.2	4406.76	5098.78	5346.73	5336.8	5696.67	5091.32	5584.73	5827.43	6631.39	6314.01	NA	7435.2	NA
1-1_GL0067006;1-1_GL0120486;7-1_GL0071761;G1-2A_GL0001893;MC-0-3_GL0002686	55996.1	49664.3	42900	91547.4	101701	94218.8	110786	110614	105416	92676.8	NA	103483	NA	80264.7	NA			Q7TPR4	1781.24	2126.88	2118.78	2028.65	2625.43	2406.77	NA	NA	2980.21	NA	NA	NA	NA	NA	NA
1-1_GL0067006;7-1_GL0071761;G1-2A_GL0001893;MC-0-3_GL0002686	83584.1	89850.2	87905.1	82679.1	76524.9	79068.6	84709.6	84134.4	81440	90929.4	85787.6	82920.1	84862.9	102641	64999			Q7TPZ8	147853	99402	127675	131341	161419	177006	159260	163308	158478	83596.6	94372.1	62137.6	104707	98593.9	78721.4
1-1_GL0067006;G1-2A_GL0001893;MC-0-3_GL0002686	6692.6	8252.24	7592.69	6801.43	NA	NA	NA	NA	NA	NA	NA	NA	NA	NA	NA			Q7TQ65	NA	NA	NA	3781.89	5443.16	4609.84	4235.93	4490.98	5488.35	NA	NA	NA	NA	NA	NA
1-1_GL0067993	7728.8	7635.91	8526.06	8212.51	7858.03	8461.65	9891.61	6658.1	9130.35	NA	NA	7875.87	6072.86	7365.85	NA			Q7TSV4	2518.89	2112.02	2509.7	3783.55	2845.77	3270.63	3308.08	3530.08	3181.01	NA	NA	3467.62	NA	4705.03	NA
11_GL0068447	2753.95	2835.24	3328.41	3193.04	3690.24	4092.08	3370.82	3254.73	5039.99	NA	NA	NA	NA	NA	NA			Q80T03	9218.28	10471.1	8464.5	8188.55	8742.16	8354.35	10070.8	8611.48	9170.96	7161.31	5344.75	7605.89	5220.02	NA	3235.37
11_GL0068447;1A-dyr2-07_GL0028344;20_GL0014296;MC-0-1_GL0050997;MC-6-2_GL0094206;MC-6-3_GL0028764;MH-0-3_GL0071339;S-Fe10_GL0104485;S-Fe10_GL0173635	27987.2	27918.8	27155.4	26344.2	28025.6	25971.1	28219.2	28966.6	30261	33497.7	31154.5	33635.2	34142.5	34132.1	31209.1			Q80T19	5383.46	6145.17	6277.29	6664.83	7004.84	6910.61	5614.75	6607.08	4583.68	NA	NA	6475.79	NA	NA	NA
1-1_GL0068882	10081	13175.8	12735.1	15676.2	15615.9	14726.1	14939.4	16367.8	15287.8	15216.7	16003.1	14837.2	12304.5	12849.3	16755.7			Q80V42	1672.87	2042.16	1886.02	2459.36	2440.82	2926.4	NA	NA	NA	NA	NA	NA	NA	NA	NA
1-1_GL0068882;23_GL0056999;32_GL0103930;5_GL0125181	4271.38	4498.76	4628.24	4177.18	3929.98	4223.07	3524.8	4205.12	3219.59	2720.81	4218.52	2678.64	NA	NA	4216.64			Q80VA0	2289.13	2647.15	2633.74	2206.01	2452.1	2044.82	2791.5	2419.69	1828.15	NA	NA	NA	NA	NA	NA
1-1_GL0068882;23_GL0056999;4-2_GL0094209;5_GL0125181;S-Fe20_GL0056614;S-Fe20_GL0177615	1916.19	2089.73	1971.89	1311.01	1300.99	1279.51	1186	1601.66	1605.62	NA	NA	NA	NA	NA	NA			Q80VQ0	2310.52	2450.47	2164.05	2844.74	2610.23	2742.89	2708.88	2535.98	2377.91	1500.41	3463.79	2327.81	1725.82	NA	NA
11_GL0068944;2A-dyr14-07_GL0021171	5067.98	4111	4506.34	4876.75	4228.87	4176.22	4707.23	3992.74	3439.64	2048.91	1944.99	2161.87	2871.14	2345.21	2719.86			Q80W54	3359.11	3474.66	3418.1	4434.04	4190.22	4507.56	6277.17	5765.51	6104.45	7377.76	10358.7	4071.82	8148.24	NA	NA
1-1_GL0069134	14168.1	14255.5	12974.8	13435.4	14105.6	13150.6	13867.3	14053.6	13746.6	11324.9	10339.6	11067.5	9478.93	12196.2	11690.5			Q80X71	1928.78	2066.77	2273.6	2036.93	1248.59	2154.43	2152.7	1525.29	2109.25	NA	NA	NA	NA	NA	NA
1-1_GL0069134;2-1_GL0005249;2-7_GL0091106;2A-dyr14-06_GL0037258;6-4_GL0106904;Group2-2A_GL0004677;Group2-8A_GL0030196;MC-6-3_GL0079455	81387	72264.6	72317.4	70908.5	79227.1	79240.9	69694.9	75141.5	72126.8	62512.8	69082.3	62532	61509.8	53916	56019.2			Q80X90	15876.8	16023.2	16253.6	15180.5	15756.8	15976.3	15961.3	16315.2	15001	13179.5	13897.2	13121.8	14125.9	12661.3	9645.57
1-1_GL0069134;2-1_GL0005249;2-7_GL0091106;2A-dyr14-06_GL0037258;6-4_GL0106904;Group2-2A_GL0004677;MC-6-3_GL0079455	NA	NA	NA	83653.3	NA	132433	104038	88167.8	100639	121788	118045	104375	85889.7	102215	98510.8			Q80X90;Q8BTM8	6172.43	5874.37	5815.17	NA	NA	NA	8277.1	6182.47	NA	NA	NA	NA	NA	NA	NA
1-1_GL0069134;2-7_GL0091106	1560.93	1478.64	1876.98	NA	NA	NA	NA	636.093	779.297	NA	NA	NA	NA	NA	NA			Q80XI7	5179.17	6066.38	5825.71	5838.5	NA	5846.84	NA	NA	NA	NA	NA	NA	NA	NA	NA
11_GL0069170	13692.7	13652.2	13237.8	15021.5	13216	13294.2	14929.2	14480.6	15830.8	16931.6	16832.8	13586.3	13826.1	NA	NA			Q80XL6	2958.31	3428.28	2720.5	4126.06	4516.77	5469.06	4493.21	5924.57	NA	NA	NA	NA	NA	NA	NA
11_GL0069170;6-2_GL0007112;S-Fe20_GL0049163	16746.3	17217.1	17062.4	26506.9	25042.5	25808.6	23751.6	25418.8	24320.5	25746.7	27069.6	23075.7	24698.8	25219.2	26693.1			Q80XN0	8986.99	8074.44	7911.29	7774.55	8680.88	8211.07	10289.4	11558.3	9746.51	5402.62	6504.89	18096.3	NA	NA	5430.29
11_GL0069170;S-Fe20_GL0049163	18692.4	17715.2	17140.1	19535.9	18194.3	17825.4	20412.7	20800.4	19400.4	19815	17923.3	18162.4	23107.5	21296.2	21667.4			Q80Z19	798896	772038	783422	775067	759941	738643	736018	724404	732875	692766	675185	654675	658363	652402	658189
11_GL0069306	21932.5	21495.4	21854	20858.5	21312.3	21560.8	20849	20694.7	19926.4	17986.5	17404.7	17338.8	17142	16156	18371.9			Q8BFR4	10789.4	12175.7	11855	13816.2	14967.6	14632.6	14532.9	14584.1	15126.5	10974.2	14403.7	11282.7	12678.4	12993.6	14313.3
1-1_GL0070410	10025.8	9597.55	9563.36	9757.98	9528.91	9378.81	10044.4	10729.3	9037.21	9462.35	7888.8	9505.3	8047.16	8962.43	9332.37			Q8BFR5	445862	435810	402318	459968	447670	510254	462879	529164	492650	481663	517626	543959	515817	461405	566756
1-1_GL0070410;1-1_GL0122934;1-4_GL0080002;MH-6-1_GL0099057;MH-6-4_GL0130457;S-Fe9_GL0263219	3099.02	2714.91	2591.04	2422.06	2810.86	2260.62	2239.05	1986.86	2164.83	NA	NA	NA	NA	NA	NA			Q8BFS6	6875.41	7478.05	6739.86	6649.2	7046.36	7062.29	7005.73	7840.56	7875.76	6645.46	8573.61	7056.98	8368.44	5286	8940.03
1-1_GL0070410;1-2_GL0113636	20868.2	21514.1	23204.8	19982.5	18897.3	18627.2	19126.5	20182.8	NA	17645.9	17304.2	12274.6	14929.4	10516	16955.6			Q8BFZ3	NA	NA	NA	62386.3	63399	62616.2	60541	66112.6	58495.5	NA	NA	NA	NA	NA	NA
1-1_GL0070410;1-2_GL0113636;MC-0-1_GL0113705;MH-6-1_GL0099057	9753.6	10576.5	10815	11322.6	12347.7	10407.8	12329.2	12437.8	11545.3	6987	7727.04	7220.48	9699.29	6859.25	6390.09			Q8BFZ9	4331.42	4851.62	4781.07	4658.32	5259.45	4939.7	4996.24	4441.24	4940.16	4086.54	4647.28	4698.93	NA	NA	NA
1-1_GL0070410;1-8_GL0071629;MC-0-3_GL0096743	NA	1775.35	NA	9971.74	8656.24	8248.07	8686.25	9113.27	9031.11	NA	4751.96	5704.56	NA	6586.01	NA			Q8BFZ9;Q91X78	3653.14	3589.16	3365.89	3655.21	3867.48	3368.89	3872.49	3881.34	3308.23	2704.67	3509.5	3806.36	1278.61	3671.52	3072.4
1-1_GL0070410;MC-0-3_GL0096743	28616.3	39666.5	43106	36983.9	36956.4	36998.2	38807.6	38943.7	38068.2	40145.5	36811.4	32891.5	39899	33779.1	30027.7			Q8BGA2	2874.66	NA	NA	4364.35	NA	NA	NA	NA	NA	NA	NA	NA	NA	NA	NA
1-1_GL0070410;MH-6-1_GL0099057	15224.8	15436.3	16183.6	17681.2	19390.4	16555.1	16330.4	16350.1	16998.7	14936.6	15124.7	16189.9	21882.9	17619.1	19488.2			Q8BGH2	3430.61	2928.78	3260.15	4754.01	5707.42	4877.32	4884.31	5345.5	4255.9	NA	NA	NA	NA	NA	NA
11_GL0070885;2-4_GL0084012;6-2_GL0078653;G1-1A_GL0082976	3616.54	4248.41	4273.55	4374.98	5223.12	4198.43	5432.79	4790.67	5015.4	4729.26	4402.36	3814.99	NA	4020.57	5440.49			Q8BGQ7	NA	NA	2044.03	1350.58	2026.54	1160.37	1742.1	1340.42	NA	NA	NA	NA	NA	NA	NA
1-1_GL0071681	2620.43	2726.25	2313.07	2621.11	2809.21	2354.79	2695.15	2221.03	2425.19	2679.93	2079.35	1632.54	NA	1677.66	2681.47			Q8BH24	NA	1895.07	2085.21	4912.17	5254.48	5536.8	4044.88	NA	5145.69	NA	NA	NA	NA	NA	NA
11_GL0071971	5984.38	5499.29	5519.56	4014.84	2978.31	4453.23	5357.36	NA	NA	NA	2261.16	2247.18	NA	NA	NA			Q8BH95	6971.56	6316.61	5873.38	6369.19	7563.11	6720.15	7122.99	6968.33	6962.28	6662.04	6449.95	6808.7	6970.46	6134.75	NA
1-1_GL0072113;1-1_GL0151547	966.567	934.418	852.537	NA	NA	NA	NA	NA	NA	NA	NA	NA	NA	NA	NA			Q8BHG3	2758.3	2289.11	2586.7	3036.62	NA	2642.72	3989.92	3464.89	3213.49	NA	NA	NA	NA	NA	NA
11_GL0072670	12354	11948.6	12541.8	14661.8	13751.9	13156.7	14021.8	12379.9	14198.3	NA	12150.5	NA	NA	10765.9	NA			Q8BHL4	8544.07	8579.41	8687.12	8327.45	8019.37	8845.54	8011.54	7162.12	7473.73	5105.34	7466.5	5579.19	6838.6	5109.26	4700.19
11_GL0072994	1345.65	1770.25	1608.21	1129.34	1370.05	NA	NA	1371.91	1102.92	NA	NA	NA	NA	NA	NA			Q8BHN3	5846.76	6154.32	6069.38	5800.18	5702.54	5573.11	6774.23	6564	6302.79	5995.43	5943.34	8801.56	NA	NA	8238.31
1-1_GL0073107	6792.69	7420.94	7179.57	7041.69	6613.08	6300.82	6019.95	5312.97	5623.45	NA	6401.25	NA	NA	5404.93	NA			Q8BI08	7161.9	7861.61	7108.43	14587.6	14927.7	14334	12381.5	13910.9	14926.2	13818.2	18689.1	14461.5	13281.7	12148.1	9490.05
1-1_GL0073107;11_GL0021701;20_GL0040658;50_GL0015409;6-6_GL0043770;8-5_GL0025241;MH-6-5_GL0010319;S-Fe20_GL0089130	5671.92	4424.92	NA	26847.2	33862.8	27993.1	33466.6	28090	33307.8	33406.1	32976.2	30467.8	32198.6	33179.8	32925.3			Q8BIJ6	1238.64	1559.28	1519.58	1175.71	1179.92	2015.29	NA	NA	NA	NA	NA	NA	NA	NA	NA
1-1_GL0073107;11_GL0021701;20_GL0040658;6-6_GL0043770;MH-6-5_GL0010319	11278.9	9357.84	9771.25	9990.93	8201.93	10041.2	8075.74	8851.94	9681.45	2569.49	NA	NA	NA	NA	NA			Q8BJ64	9573.17	9149.56	9002.69	10718.5	11178.6	10347.1	11795.9	12157.4	12632	9879.3	11531.3	11455.8	9513.87	10693.7	12043
1-1_GL0073107;11_GL0021701;6-6_GL0043770	38071.5	28265.1	28660.9	38190	40763	36510.8	46035.6	47634.3	52127.9	42669.2	39343.3	43377.4	NA	NA	37241.8			Q8BJZ3	2826.78	2640.06	2330.79	NA	NA	NA	NA	NA	NA	NA	NA	NA	NA	NA	NA
1-1_GL0073437	836.976	NA	NA	8316.78	9663.7	9242.59	12134.2	9948.24	10062.8	10524.3	8125.97	7579.29	8116.56	6230.29	7123.92			Q8BK48	36018.5	32852.9	34013.2	33204.1	35504.1	34242.8	31149.3	31877.4	33879.8	24223.8	21153.8	20921	18699.2	19631.4	13978.2
1-1_GL0073618	13892	12849	14445.5	13188.6	14160.6	13146.4	13721.7	10997.7	11709	12735.3	9826.72	12752.1	5176.01	NA	NA			Q8BK48;Q8QZR3	NA	NA	NA	19871.5	23612.1	22450.9	18191.3	19618.5	14904	5182.8	5691.35	5059.45	2475.78	NA	5700.08
11_GL0073714	8188.99	7983.33	7679.42	6339.76	6645.33	5973.9	6365.44	5691.38	6655.01	4461.83	5862.97	4911.25	4217.28	6185.89	5234.61			Q8BK48;Q8QZR3;Q91WG0	55630.9	57818.9	50524.2	NA	NA	NA	NA	NA	NA	NA	NA	NA	NA	NA	NA
1-1_GL0074148	19217.7	19126	17846.8	23601	23670.5	22885.6	23734.9	21906.8	23471	26641.1	27420.2	34982.2	30712	30839.8	31734.4			Q8BK48;Q91WG0	77652.7	71753.9	73326.3	74114.3	79995.6	75206.1	75197.6	69166.2	74739.4	41973.3	34990.9	37226	34327.4	29264.4	20288.3
1-1_GL0074148;Group2-6A_GL0046013	36866.4	37631.5	36311.8	38536.1	33740.7	36941.3	NA	33968.4	32875.3	NA	NA	NA	NA	NA	NA			Q8BK63	2016.26	2166.67	2332.52	1904.34	NA	2068.18	NA	NA	2089.51	NA	NA	NA	NA	NA	NA
11_GL0074655	5247.96	4192.99	4528.27	4531.03	4445.36	4080.21	3690.35	4602.38	3908.19	6085.42	4738.23	3570.19	4950.35	3769.02	NA			Q8BLN5	1283.24	1299.95	1488.35	1198.33	1139.95	NA	NA	974.18	NA	NA	NA	NA	NA	NA	NA
1-1_GL0074860;1A-dyr1-07_GL0006858;1A-dyr2-07_GL0078401;2-1_GL0066207;35_GL0082428;S-Fe12_GL0145311	90160.8	78213.4	83920.2	87805.1	88520.4	82957.6	83783.8	79368.2	90836.1	60251.8	63339.2	66859.1	68023.5	60665.6	53269.2			Q8BM96	12548.7	14495.9	13685	11891.9	13222.9	13795.4	12149.3	11653.5	11594.9	8554.76	12339.4	10452.9	10188.2	9742.41	NA
1-1_GL0074860;1A-dyr1-07_GL0006858;1A-dyr2-07_GL0078401;2-1_GL0066207;4-1_GL0083000;8-2_GL0041742;8_GL0175912;G1-5A_GL0040449;MC-6-2_GL0166527;S-Fe12_GL0145311	63017	68736.2	66875.1	81115.1	81025.4	79606.2	82872.5	94642.6	94875.6	83889.9	90894.8	87418.5	84251.6	82954.2	74603.3			Q8BMD8	10558.7	9448.66	8560.49	12221.2	12617.1	12752	12795.3	14048.6	13900.5	15010	15152.5	16201.5	NA	13174.3	NA
1-1_GL0074860;1A-dyr1-07_GL0006858;1A-dyr2-07_GL0078401;2-2_GL0155297;35_GL0082428;4-1_GL0075275;4-1_GL0083000;5-8_GL0014983;8-2_GL0009559;8-2_GL0041742;8_GL0175912;G1-5A_GL0040449;MC-6-2_GL0166527;S-Fe12_GL0144225;S-Fe12_GL0145311	NA	NA	NA	NA	NA	NA	54190.3	48223.8	56078.8	47122	50219.2	42955.6	30073.4	36186.7	40334.7			Q8BMF4	4509.18	7534.67	10067.1	6676.07	6687.41	7239.77	6192.86	6743.99	6193.17	6008.12	4493.63	NA	NA	11049.5	NA
1-1_GL0074860;1A-dyr1-07_GL0006858;2-1_GL0066207;2-2_GL0155297;35_GL0082428;4-1_GL0075275;4-1_GL0083000;4-8_GL0058658;5-8_GL0014983;8-2_GL0009559;8-2_GL0041742;8_GL0175912;G1-1A_GL0037992;G1-5A_GL0040449;MC-6-2_GL0166527;S-Fe12_GL0144225;S-Fe12_GL0145311	24803.5	30384.2	31449.8	24790.9	24865	18950.5	21118.1	19904.3	22499	10206.3	7950.56	6901.09	6622.93	8871.31	5838.82			Q8BMS1	11647.6	11696.3	11226.8	11971.4	12097.6	11899.2	13269.1	12649.3	11970.9	13312.1	10574.4	12761.3	12201.8	11803.8	12024.1
1-1_GL0074860;2-1_GL0066207;4-1_GL0075275;G1-5A_GL0040449;MC-6-2_GL0166527;S-Fe12_GL0144225;S-Fe12_GL0145311	7840.85	8327.8	8392.52	12494.7	13624	12625.5	10294.4	11341.2	14383.8	12668.5	10721	11447.6	11882.2	11281.5	NA			Q8BND5	22532.1	21529.6	20589.5	20973.3	21473	21795.8	20472.6	19314.5	21201.4	19607.2	20568.9	17312.4	18249.8	16214.4	16457.6
1-1_GL0074860;2-1_GL0066207;G1-5A_GL0040449;MC-6-2_GL0166527	1120.21	30673	NA	98166.5	89348.3	104153	96309.5	98698.7	98378.5	116040	123727	109531	105244	100682	110542			Q8BSY0	437.472	437.995	459.681	424.011	NA	287.082	NA	NA	NA	NA	NA	NA	NA	NA	NA
1-1_GL0074860;2-1_GL0066207;G1-5A_GL0040449;MC-6-2_GL0166527;S-Fe12_GL0145311	58309.8	57420.7	28430.3	71867.5	76486.1	72611.2	74129.9	81029.1	82512.2	50327.1	62987.3	54081.8	48096	41747.3	41564.8			Q8BT60	17452.2	16523.3	15906.2	14429.5	13550.8	13471.2	14821.5	14666.2	13529.7	11883.4	11453.8	12792.9	10849	13244.7	11599.7
1-1_GL0074860;35_GL0082428	30790.3	31969.1	29744.6	78236.5	82775.3	79087.2	88028.3	87059.3	99854.7	110198	90010.1	103259	103204	109854	93579.6			Q8BT60;Q8C166	38251.4	37780.6	43173	35776.5	35411.3	34997.1	35522.1	37228.4	36190.8	42546.9	42233.6	40135.9	30906.5	36609.6	38242.3
1-1_GL0074860;G1-5A_GL0040449;MC-6-2_GL0166527	23250.3	20947.3	22413.4	25176.9	28297	24013.2	25426.7	25704.4	25399.8	21585.7	22824.1	11505.4	21415.2	16605.4	17950.4			Q8BTY1	1080.81	1077.42	1153.9	1433.39	1044.38	1183.71	1325.66	NA	1501.66	NA	784.483	NA	NA	NA	NA
1-1_GL0075236	12612.8	12073.1	12521.3	12050.8	12312.8	12388.2	NA	12159.6	11282.9	7478.03	NA	NA	NA	NA	NA			Q8BVI4	1215.42	1264.87	1376.06	1203.92	1464.01	NA	NA	1410.12	NA	NA	NA	NA	NA	NA	NA
1-1_GL0075563;10_GL0023967;17_GL0133654;1_GL0105535;20_GL0170672;22_GL0105944;2_GL0124299;4-8_GL0084365;8-5_GL0001109;Group2-6A_GL0004850;S-Fe16_GL0027533	1343.38	1222.54	1197.22	784.494	NA	NA	1008.51	513.368	580.789	NA	NA	NA	NA	NA	NA			Q8BW75	8501.1	19315	18398.3	18065.6	15140.3	15132.1	17475.7	18704.3	16109.2	25765.9	19438.4	22756.5	NA	21929.4	25131.1
1-1_GL0075563;17_GL0133654;1_GL0105535;22_GL0105944;S-Fe16_GL0027533	11881	11047.9	10662.6	15331.7	17134.1	15525.8	13000	13919.4	12421.6	13585.3	13791	12891	15201.5	11673.5	13084.9			Q8BWF0	2232.02	2359.14	2470.71	2305.79	NA	NA	NA	1919.95	NA	NA	NA	NA	NA	NA	NA
1-1_GL0075563;17_GL0133654;1A-dyr4-07_GL0110968;1_GL0105535;22_GL0105944;2_GL0124299;4-8_GL0084365;8-5_GL0001109;S-Fe16_GL0027533	69363.4	67488	65904.5	46848.8	38265.2	44321.2	62084.2	63450.1	67513.8	70901.1	79949.8	72969.3	NA	82231.8	78972.4			Q8BWM0	NA	1117.45	989.658	1097.4	NA	939.162	NA	856.788	NA	NA	NA	NA	NA	NA	NA
1-1_GL0075654	4412.97	4380.06	4342.16	4502.46	4962.33	4917.57	4826.62	5104.18	4831.86	NA	4911.25	NA	NA	NA	NA			Q8BWQ1	NA	830.853	741.03	7025.24	NA	NA	NA	NA	4388.89	NA	NA	NA	NA	NA	NA
1-1_GL0076153	4110.72	4993.01	5316.26	NA	5497.06	7660.83	7931.59	8338.36	9190.56	8463.29	NA	NA	NA	9033.49	NA			Q8BWR2	4312.66	4626.04	3906.81	NA	NA	NA	NA	NA	NA	NA	NA	NA	NA	NA	NA
11_GL0076757	13940.7	13191.5	13824.2	12658	13884.2	14489.5	13392.2	12483.8	12945.8	12508.5	11399	13451.9	10782.2	10869.3	11013.8			Q8BWR8	1965.76	NA	NA	2128.72	2293.54	2024.71	1638.12	2548.28	NA	NA	NA	NA	NA	NA	NA
1-1_GL0077500	3891.26	4199.16	4256.22	4730.03	4786.31	4356.92	4746.14	4754.16	4751.98	NA	NA	NA	NA	NA	NA			Q8BWT1	15558.5	13385.7	13250	11259.6	10585	11038.5	11395.6	10159.3	10186.1	8207.38	7411.2	7101.09	8471.08	8320.5	5478.88
1-1_GL0077500;S-Fe10_GL0105436	6763.25	6767.39	7013.21	6131.14	6713.46	6142.79	5297.1	NA	6204.83	NA	6184.04	NA	NA	NA	NA			Q8BWY3	1740.23	1622.78	1581.59	1459.31	1692.86	1687.56	1451.49	1766.83	1351.82	811.29	NA	1158.36	NA	NA	1864.16
1-1_GL0077524	12354.8	12621.4	10665	13402.7	11487.1	11773.4	12865.9	12581.2	12552.1	12255.2	11779.7	9517.53	10413.2	10106.1	9774.99			Q8BXK9	3609.99	3683.4	2932.96	4525.1	3828.12	4234.84	3878.74	2506.62	3349.06	NA	NA	NA	NA	NA	NA
1-1_GL0077781	7224.11	6607.41	5773.35	4908.29	4236.11	4983.41	4880.86	3573.74	5065.47	4563.17	NA	NA	NA	NA	NA			Q8BYF6	6581.02	6563	6683.5	7865.9	8506.73	7388.21	7581.43	7022.63	8016.71	NA	NA	NA	NA	NA	NA
1-1_GL0077781;G1-1A_GL0096658;MC-0-3_GL0016776;MH-0-4_GL0056065	16477.2	17341.7	15338.8	NA	12024.9	9231.28	NA	NA	NA	NA	NA	NA	NA	NA	NA			Q8BYY9	2061.05	2828.8	2461.88	2087.54	2457.58	2220.74	2366.42	2658.96	2726.35	NA	NA	NA	NA	NA	NA
1-1_GL0078624	4074.9	4204.34	3779.99	5138.7	4115.34	3433.11	3468.33	NA	NA	NA	NA	NA	NA	NA	NA			Q8C165	12705.6	14740.3	11391.2	13130.2	11582.7	10659.5	10070.8	9586.85	10002.8	10147.5	9244.04	7597.53	10963.6	9042.64	7987.51
1-1_GL0078624;11_GL0161434;2-1_GL0043938;2-1_GL0061307;2-1_GL0106976;32_GL0021838;4-1_GL0035742;4-1_GL0052696;4-8_GL0070713;5-1_GL0042433;6-7_GL0028379;7-3_GL0054179	NA	NA	NA	30554.7	NA	32900.6	87671.8	81091.2	93099	97707.8	NA	104711	NA	NA	NA			Q8C166	4070.97	4588.72	4217.13	5266.98	4886.42	5072.27	4978.69	5525.11	4815.14	NA	4250.72	3876.33	NA	NA	NA
1-1_GL0078624;1A-dyr2-07_GL0017940;32_GL0021838;6-2_GL0018346;6-4_GL0066269	5607.02	4600.33	5081.81	5409.55	NA	4821.02	6321.03	5328.62	NA	NA	NA	NA	NA	NA	NA			Q8C1B7	1929.56	2274.33	1365.22	NA	1737.99	NA	NA	NA	NA	NA	NA	NA	NA	NA	NA
1-1_GL0078624;2-1_GL0106976;32_GL0021838;4-1_GL0035742;4-1_GL0052696;4-8_GL0070713;5-1_GL0042433;6-7_GL0028379;7-3_GL0054179	323171	267507	272891	301575	309571	295695	268441	300105	309700	295848	257263	288561	242824	230373	212591			Q8C1N8;Q8C1P2	1.14873e+06	1.11064e+06	967290	1.50714e+06	1.56469e+06	1.55576e+06	1.49096e+06	1.5042e+06	1.60447e+06	840947	840068	747026	837158	721526	759718
1-1_GL0078624;32_GL0021838;4-1_GL0052696;4-8_GL0070713;5-1_GL0042433;6-7_GL0028379	71776	101892	102748	128128	124821	130993	133409	119337	133220	113510	111243	113416	113357	131494	83139.1			Q8C3K6	40046.1	40274.2	42525	31756.6	34261.7	32328.9	38601.7	32529.5	37823.9	42439.1	38240.6	53507.5	47428.6	47842.5	42993.4
1-1_GL0078745	2160.27	2737.52	1912.27	2020.36	1856.7	2472.39	952.145	1992.16	2589.5	2337.5	NA	2580.27	NA	NA	NA			Q8C522	NA	2762.98	NA	2733.23	3217.69	2625.41	NA	NA	NA	NA	NA	3579.42	NA	NA	NA
1-1_GL0078756	12607.5	12938.9	11964.4	13330	14869.6	12872.7	13212.2	13849.3	14350.5	11672	11154.7	13611.8	11320.4	8505.24	9990.63			Q8C6C9	173300	157688	142459	127290	115426	119245	133650	143255	126720	102837	98364.7	95367.7	128627	121562	132987
11_GL0079244	8551.6	8552.56	8657.51	8385.26	8938.84	NA	NA	NA	NA	NA	NA	NA	NA	NA	NA			Q8C6D4	NA	10826.9	9277.83	NA	NA	NA	NA	NA	NA	NA	NA	NA	NA	NA	NA
11_GL0079244;11_GL0161216;2A-dyr16-07_GL0072430;6-7_GL0102956	6670.37	8021.45	8038.98	6761.62	6953.22	7814.38	5093.28	5798.74	6080.94	5655.52	5304.9	4914.95	NA	5815.17	4444.41			Q8CAQ8	4189.05	4152.14	3756.61	3890.95	3892.51	4403.81	4557.45	4499.79	4802.48	4681.82	3965.97	NA	NA	NA	NA
1-1_GL0080453	3435.89	3714.24	3656.59	3798.04	3593.75	3526.46	3170.82	3283.72	3365.04	NA	NA	NA	NA	NA	NA			Q8CAY6	1860.94	2170.72	1986.71	NA	NA	4915.3	NA	NA	NA	NA	NA	NA	NA	NA	NA
1-1_GL0080583	16629.3	17352	17292.5	16395	16311.5	16531.3	15685	15436.8	14207.6	13239.1	14529.9	14153.5	12893.1	12544.3	12381.9			Q8CC88	978.068	957.469	1056.75	1518.32	1265.67	1275.38	1285.29	1198.55	1375.91	1200.45	NA	NA	NA	NA	NA
1-1_GL0080605	8616.54	8704.05	8897.98	9906.07	10126.1	10130.3	9719.11	9845.65	9443.28	9789.3	11412.2	10688.6	9473.82	8892.49	14305.9			Q8CCH2	7754.14	7653.97	7214.41	7555.26	6813.92	6353.79	6993.74	7806.64	7350.98	8095.28	8767.84	7577.72	15253.1	8532.71	6714.31
1-1_GL0080606	6137.35	6156	6595.37	7546.55	6754.61	7156.9	7102.42	7751.27	7832.93	5946.32	7781.64	6642.2	5962.09	9190.41	8872.89			Q8CG76	NA	NA	NA	434.61	NA	NA	NA	NA	NA	NA	NA	NA	NA	NA	NA
1-1_GL0080710	23119.4	24469.2	25352.8	30605.1	30322.3	35227	29601.3	34288.5	29740.9	20311.2	27158.1	27889.6	32113	28509.7	24157.6			Q8CGC7	NA	841.868	NA	NA	2122.21	1124.43	1155.05	1030.81	1358.62	NA	NA	NA	NA	NA	NA
1-1_GL0080710;1-2_GL0126535;11_GL0060737;2-1_GL0115202;2-4_GL0063036;2-6_GL0065005;3-5_GL0058721;47_GL0080996;G1-8A_GL0090415;S-Fe11_GL0081509	81577.2	87382.2	81027.7	99502.3	93172.6	97560.6	97815.4	93651.9	104361	103589	96975.9	98395	102415	108233	96317.7			Q8CGR5	1090.19	1111.53	1020.67	943.239	613.157	995.888	NA	662.516	805.808	NA	NA	NA	NA	NA	NA
11_GL0081446	7468.33	8190.4	8874.04	7196.94	7408.38	7084.27	6163.59	5888.11	7590.93	6921.91	4536.53	6150.08	6594.22	5400.5	5812.89			Q8CHP8	3697.06	3512.91	3489.53	4693.29	5153.48	5289.96	6133.33	5518.14	5535.03	NA	NA	NA	NA	NA	NA
11_GL0081446;11_GL0154813;6-7_GL0106790	7645.62	8675.64	8593.18	6955.76	6525.42	5440.41	8228.36	7569.41	9019.02	8215.48	8549.2	8002.99	8441.08	9262.54	9312.68			Q8CHT0	1587.07	1700.15	NA	NA	NA	NA	NA	NA	NA	NA	NA	NA	NA	NA	NA
11_GL0081716	3024.66	3044.32	2796.94	2266.96	2318.98	2318.58	2196.12	2690.32	2103.53	NA	NA	NA	NA	1695.6	NA			Q8CI94	11479.8	8276.78	9986.17	6743.69	8049.77	8230.4	7100.07	6004.69	7143.1	NA	5330.12	NA	NA	NA	NA
11_GL0081716;1A-dyr4-07_GL0086302;2_GL0037426;S-Fe7_GL0247586	4732.97	4012.67	4441.17	12721.7	10513.8	7019.77	NA	NA	44162.9	NA	NA	NA	NA	NA	NA			Q8CIE6	29283.1	25866.8	24585	37262.6	35980.1	38137.1	40945.5	37784.4	36835.9	44373.2	45487.5	41419.5	37702	40090.6	47750.7
11_GL0081716;2_GL0037426	21769.4	27466.9	24361.9	36855.2	37393.5	38053.2	33989	32067.6	37418.2	42661.9	43644.9	41638.7	38083	34615.2	39748.5			Q8JZM8	2837.98	2593.34	2826.85	3130.93	2926.5	2831	3096.81	2545.59	2983.53	2964.01	2833.58	3395.08	NA	NA	NA
11_GL0081716;2_GL0037426;S-Fe7_GL0247586	26964.8	30338.1	24588.3	26864.4	30191.7	29460.8	NA	31654.6	28148.6	23907.2	23419.5	22907.5	14472.7	21686.4	18693.4			Q8JZN5	NA	2838.79	2540.52	2657.45	2771.44	2597.71	3308.08	3010.65	3641.33	2680.42	4362.15	NA	NA	NA	NA
1-1_GL0082194	1534.85	2094.79	1639.6	1794.38	1754.47	NA	NA	NA	NA	NA	NA	NA	NA	NA	NA			Q8JZQ5	29264.2	28368.4	27394.1	31897.7	32846.8	34861.7	30645.3	30804.5	29217.8	34894.3	35974	33980	34754.6	35560.2	35504.5
11_GL0082595;1A-dyr4-07_GL0009278;20_GL0080668;5_GL0105816	11954	9440.66	10902.7	NA	NA	NA	NA	NA	NA	NA	NA	NA	NA	NA	NA			Q8JZU2	10426	9587.85	11078.9	13904.1	12786.3	13732.9	15025.6	14199.2	14524.1	13743.7	12647.1	17929.6	13304.5	15869.8	15309.2
1-1_GL0082828	4626.41	4558.62	4564.62	NA	NA	NA	NA	5621.18	NA	NA	NA	NA	NA	NA	NA			Q8K0C5	1.06417e+06	1.12619e+06	1.18691e+06	1.75211e+06	1.69101e+06	1.59508e+06	1.98648e+06	1.91756e+06	1.96478e+06	2.15187e+06	1.93453e+06	2.23996e+06	2.10135e+06	2.03621e+06	2.12838e+06
1-1_GL0082828;11_GL0155661	6392.54	5788.41	5873.58	NA	NA	NA	NA	NA	NA	NA	NA	NA	NA	NA	NA			Q8K0C9	46783.8	45239.8	44024.8	40953.9	41204.9	41767.2	43877.2	43514.7	41399.4	42365.8	39367.9	41748.2	39959.4	41211.9	42770
1-1_GL0082829	3309.48	3554.53	3173.09	NA	NA	NA	NA	NA	NA	NA	NA	NA	NA	NA	NA			Q8K0D2	NA	1296.21	1254.49	NA	NA	NA	NA	NA	NA	NA	NA	NA	NA	NA	NA
1-1_GL0082829;11_GL0155660;17_GL0098350;1_GL0038377;2-1_GL0064618;2-1_GL0079956;2-2_GL0060647;2-3_GL0101170;3-6_GL0039132;34_GL0024708;Group2-1A_GL0062679	95171.8	83713.2	90333.7	NA	5318.8	NA	NA	NA	NA	NA	NA	NA	NA	NA	NA			Q8K0E7	3564.73	3758.74	3076.57	4645.33	NA	4392.63	NA	NA	3384.18	NA	NA	NA	NA	NA	NA
1-1_GL0082829;11_GL0155660;2-7_GL0046144;4-1_GL0069166	254359	261711	257636	237641	223561	226043	219325	212877	226221	199034	195973	211588	199420	205511	203879			Q8K0L2	2207.85	2791.54	2620.35	3560.75	3858.66	3575.94	4521.84	3560.51	4165.63	3310.82	3399.07	5296.91	NA	NA	5296.46
1-1_GL0082829;17_GL0098350;1_GL0038377;2-1_GL0064618;2-2_GL0060647;2-3_GL0101170;2-7_GL0046144;3-6_GL0039132;34_GL0024708;4-1_GL0069166;G1-5A_GL0006982;Group2-1A_GL0062679	228570	157877	214084	220544	287275	269010	266729	189322	326672	NA	176665	160944	196094	179023	141186			Q8K157	7259.92	6911.92	7281.84	6414.98	6069.86	7006.14	6558.41	6786.94	7091.92	6778.41	7841.24	6690.88	6307.52	4504.67	5412.57
1-1_GL0082829;2-7_GL0046144;4-1_GL0069166;4-2_GL0117370;5-1_GL0073748;Group2-1A_GL0062679	3466.69	4558.19	3903.77	4026.05	3074.11	3714.09	NA	NA	NA	NA	NA	NA	NA	NA	NA			Q8K183	2505.52	1856.74	2519.25	1470.72	NA	NA	NA	NA	NA	NA	NA	NA	NA	NA	NA
1-1_GL0082854;1-1_GL0111479;1-2_GL0110297;3-4_GL0054324;37_GL0013375;40_GL0077841	21889.6	22155.9	21354.3	20551.5	20682.5	17277	19320	20887.5	19172.8	NA	NA	NA	NA	NA	NA			Q8K1F9	28814.3	28943.1	27184.3	36126.3	40279.4	34629.4	34119.5	27988.9	35354	18093.3	17241.9	15927.1	14001.6	15569	13475.4
1-1_GL0082854;1-1_GL0111479;37_GL0013375;40_GL0077841;S-Fe11_GL0142965	51669.5	60893.7	48867.7	68980.3	70541.5	70285	54669.4	60623.4	67853	24006.4	25794.7	14388.3	13561.6	20758.7	20782.6			Q8K1H9	19294	21158.7	20582.8	19493.9	17837.6	19534.2	16876.7	15572.4	16657.9	16183.9	19323.4	14668.8	15142.9	15744.3	14808.5
1-1_GL0082854;1-2_GL0110297;3-4_GL0054324	16106.3	15098.9	16131.1	13775.3	11945.5	10895.9	12605.6	12919.1	12735.3	6832.32	9406.71	6962.22	9567.64	6921.44	9775.36			Q8K1R3	11883.9	12927.1	12435.4	NA	NA	NA	NA	NA	NA	NA	NA	NA	NA	NA	NA
1-1_GL0083048	39596.5	38930	37314	37686.4	39785.3	35849.6	38841	38932.4	40339.9	38333.7	38478	37630.6	41260.3	44753.8	40389.8			Q8K2B3	20986.6	21828.3	21869.1	23508.6	23616.8	22976.9	23778.6	23162.7	23746.5	23946.9	21698.8	21664.3	21207.3	22944.9	21427.8
1-1_GL0083048;1-1_GL0095104;1-1_GL0110655;20_GL0029051;23_GL0079503;29_GL0067888;5-5_GL0065367;5-7_GL0133472;5-8_GL0037172;5-8_GL0061093;6-5_GL0134330;G1-3A_GL0041147;G1-3A_GL0131986;Group2-4A_GL0009226;MH-6-1_GL0097407;MH-6-2_GL0028666;MH-6-3_GL0042795;S-Fe2_GL0195698	187920	126497	180981	NA	NA	NA	NA	NA	630808	NA	NA	NA	NA	NA	NA			Q8K2I4	4861.46	5104.57	4973.27	4816.2	4664.75	4956.13	4671.74	5215.58	3573.09	3607.26	3182.62	2239.04	3492.6	NA	3165.08
1-1_GL0083048;1A-dyr4-07_GL0018595	14626.8	17740.3	19034.1	11961.9	11971.4	NA	21323.8	NA	NA	NA	22267.6	NA	NA	NA	NA			Q8K386	NA	NA	NA	NA	NA	NA	NA	NA	NA	30891.1	NA	34088.3	NA	25403.7	NA
1-1_GL0083048;35_GL0136148;5-5_GL0065367;5-7_GL0133472;6-3_GL0103114;7-8_GL0038775;MH-6-1_GL0000008;S-Fe2_GL0195698;S-Fe3_GL0215405	NA	379683	345652	NA	NA	NA	NA	NA	NA	NA	NA	NA	NA	NA	NA			Q8K3J1	5447.48	5058.94	5416.62	4264.1	3307.74	3921.27	NA	3952.19	3621.49	NA	NA	NA	NA	NA	NA
1-1_GL0083048;MH-6-3_GL0042795	6313.53	6197.63	6448.47	3315.33	2349.04	2575.95	2056.3	2575.28	2565.2	NA	NA	NA	NA	NA	NA			Q8K3X6	4836.88	4731.59	4413.08	4200.32	2953.84	5192.49	4472.46	4063.87	3766.56	NA	NA	4075.97	NA	NA	NA
1-1_GL0083104;8-2_GL0038717;MC-6-5_GL0126588;MH-6-3_GL0019229	771.599	894.008	943.834	924.648	955.146	908.966	1100.14	560.996	NA	NA	NA	NA	NA	NA	NA			Q8K419	88207.1	85112.8	86029	87244.1	84150.5	86179.7	85793.5	86786.9	77433.6	76478.9	63820.8	60181.8	61946	59463.7	65813.5
11_GL0083465;35_GL0082816	11222.3	12266.5	12500.2	10111.2	9286.44	9518.4	10639.9	10824.1	10113.4	8977.78	9648.61	10134.2	11012.4	8898.68	10426.2			Q8QZR3	26656.2	24188.8	26859.6	21059.5	21012.1	26744.7	16724.1	18912.7	18775.5	12451.3	12645.9	14378.8	5771.64	8526.1	7033.05
1-1_GL0083557;MC-0-1_GL0012723	3285.32	3825.41	3419.81	5005.49	4275.01	3928.43	3900.29	3806.08	3068.87	NA	4277.34	3465.75	NA	NA	NA			Q8QZR5	1933.92	1940.48	1684.15	1506.06	2078.51	1671.53	2313.81	1953.18	1561.04	692.658	NA	NA	NA	NA	NA
1-1_GL0083557;MC-0-1_GL0012723;S-Fe10_GL0012234	6977.92	6417.91	6803.95	9836.97	8903.33	9552.17	9323.52	11370.6	9992.75	13076.7	13505.2	11371	NA	10036.8	22206.1			Q8QZT1	5995.74	6516.5	6571.22	6386.2	6549.52	5776.39	5817.79	5974.15	5893.9	6842.3	8277.75	8143.28	7307.12	6466.01	9769.87
1-1_GL0083995;11_GL0014135;6-6_GL0074506;Group2-8A_GL0077290	3489.9	4123.37	3602.8	NA	NA	NA	NA	NA	NA	NA	NA	NA	NA	NA	NA			Q8QZW3	NA	11009.7	6439.82	12071.7	11181.4	13119.1	NA	8077.12	8821.62	NA	NA	NA	NA	NA	NA
1-1_GL0083995;2-3_GL0062049;Group2-8A_GL0077290	12914.9	13294.8	12101.2	18243.4	19283.6	20795.6	18720.7	18768.9	20374.1	18333.7	18324.1	18277.4	18338.4	20492.2	14953.5			Q8R016	20027.6	19074.7	18605.2	19147.2	22142	22509.7	18635.5	18309.7	19863.9	14200.9	13768.1	13311	10396.3	8940.91	11601.9
1-1_GL0083995;Group2-8A_GL0077290	3894.94	NA	3667.7	3175.24	3603.77	2847.82	3379.51	2854.39	3168.6	NA	NA	NA	NA	NA	NA			Q8R059	1811.34	1631.26	1638.93	2718.81	2394.72	2624.67	3041.46	3186.58	2504.11	NA	NA	NA	NA	NA	NA
1-1_GL0084350	6461.49	6890.83	6647	8065.32	7510.67	7824.4	7657.59	8135.22	7384.04	6929.95	7514.49	6653.99	8138.12	7373.78	7107.71			Q8R086	NA	569.756	892.177	895.849	NA	NA	NA	NA	NA	NA	NA	NA	NA	NA	NA
1-1_GL0084350;16_GL0036423	4167.3	4401.55	4750.09	3696.56	3739.16	4773.03	NA	3072.78	3088.85	NA	NA	NA	NA	NA	NA			Q8R0F8	3116.42	3696.42	3435.81	4213.94	3671.79	4445.91	2649	3289.38	3486.26	NA	3436.32	3289.12	NA	NA	NA
1-1_GL0084994;Group2-4A_GL0034379	5639.87	6479.86	4619.73	2584.74	3314.66	NA	4985.65	4113.27	4206.37	NA	NA	NA	4507.8	4606.87	4245.06			Q8R0I0	89231.1	97612.5	82826.5	80570.1	83194.9	87089.9	80723.9	82009.4	81355.3	67895.6	60336.1	76209.2	68404.2	64988.3	80248.7
1-1_GL0085365;40_GL0063975;MH-0-4_GL0006010;S-Fe10_GL0012304;S-Fe5_GL0040685	68351.9	68368.9	72183.8	60261.3	62799	58554.9	46632.6	61500.8	52980.6	38157.4	NA	NA	NA	NA	30971.1			Q8R0W0	8055.48	7957.42	8555	10998.5	9606.61	12134.7	9552.56	12805.7	9150.57	NA	NA	NA	NA	NA	NA
1-1_GL0085365;S-Fe10_GL0012304;S-Fe5_GL0040685	24282.8	24497.5	22218.6	24088.5	22223.4	20172.3	24389.7	22306.6	21681.1	12174	16933.5	12651.6	10347.2	11081.1	12736.2			Q8R0Y6	2955.43	3062.08	3180.71	3468.44	3149.86	3352.55	3667.75	3358.51	3136.66	2609.54	2988.05	NA	3460.64	NA	NA
1-1_GL0085365;S-Fe5_GL0040685	20032.6	21222.3	20868.5	20816.8	21908.5	19819	19788.7	19598.4	20080.8	17554.5	13781.6	13791.3	11989.2	12427.9	12983.8			Q8R143	12365.7	15611.1	15770.9	30830.2	28510.8	30909.3	24998.6	23088	23039.7	25638	24091.3	25606	24389.9	21860.3	21935.9
11_GL0086120;2-1_GL0059318;2-1_GL0063867;5-2_GL0083784;6-6_GL0120740	17458	21153.4	13457.1	99931.9	100242	101046	116561	122548	121308	106258	106922	106543	110132	107430	99154.3			Q8R146	19853.4	19350.2	18275.9	26897.4	25724.6	26808.4	26677.7	27795.1	28876.6	27066.7	28694.2	29477.5	24678.7	30098.7	27499.8
11_GL0086120;6-6_GL0120740	3735.17	3479.99	3798.56	3157.92	3780.48	3178.82	3210.91	3317.95	2899.66	3384.62	3543.91	2745.85	3522.34	4729.14	3535.66			Q8R1I1	5821.81	4881.53	4683.05	7633.08	7401.1	8441.81	NA	NA	NA	NA	NA	NA	NA	NA	NA
11_GL0086269	8246.44	7436.92	7199.06	7289.9	6142.26	5962.46	6919.06	5983.54	5626.61	NA	NA	NA	8394.12	10332.9	NA			Q8R1J1	1272.41	1743.97	2129.64	749.042	NA	NA	NA	1322.73	NA	NA	NA	NA	NA	NA	NA
1-1_GL0086568	9439.77	6687.06	7537.5	12421	12800.4	12291.2	NA	NA	NA	NA	NA	NA	NA	NA	NA			Q8R1M8	660416	538097	608421	662392	667734	574695	510528	557010	585461	524240	494737	379797	566607	541101	541939
1-1_GL0086568;1-5_GL0034417;10_GL0057711;17_GL0116041;2-1_GL0009314;2-3_GL0102173;2-4_GL0039211;26_GL0076349;2_GL0102379;3-2_GL0000386;6-3_GL0013238;6-4_GL0029541;G1-1A_GL0044068;G1-5A_GL0142398;G1-6A_GL0048735;Group2-2A_GL0084888;Group2-8A_GL0032869	323537	304815	311022	328141	350679	331533	329532	327289	335097	322889	315970	326626	340777	317107	296642			Q8R1V4	4100.65	3752.71	3446.39	NA	NA	NA	NA	NA	NA	NA	NA	NA	NA	NA	NA
1-1_GL0086568;1-5_GL0034417;17_GL0116041;2-4_GL0039211;26_GL0076349;3-2_GL0000386;G1-1A_GL0044068	24265.8	23853.3	24841.5	32367.3	31739.2	30874.6	33903	34645.2	33259.8	30388.2	31079.4	31427.4	31359.9	30933.2	27869.9			Q8R2S8	7384.04	6584.56	6957.83	5715.35	5680.17	5209.25	6615.74	6138.83	7290	6639.43	5176.18	6274	6174.32	4321.46	2162.58
1-1_GL0086568;17_GL0116041;2-1_GL0052085;2-4_GL0039211;26_GL0076349;3-2_GL0000386;4-1_GL0043663;7-1_GL0015471;7_GL0063790;MC-6-2_GL0127982	130143	127245	103479	139418	136377	144921	154597	154374	155783	165333	160309	157132	180391	193402	179914			Q8R3B1	1088.35	1270.38	1143.81	1895.28	1670.09	1752.47	1732.9	1988.97	NA	NA	NA	NA	NA	NA	NA
1-1_GL0087344;2-2_GL0076275	NA	NA	1880.42	1829.43	1865.16	1909.12	1330.44	1926.74	1689.06	NA	NA	NA	NA	NA	NA			Q8R3G9	120400	109630	118875	122037	128796	120323	117503	121415	125394	96123	94327.4	99118.8	107516	94196.4	93285.5
1-1_GL0088844	3958.85	3310.71	4165.38	5028.63	4372.94	4608.89	4122.25	4656.51	4361.2	NA	NA	NA	NA	NA	NA			Q8R4N0	3575.96	3463.48	3812.4	5253.18	4212.93	4145.47	4361.43	NA	NA	NA	NA	NA	NA	NA	NA
1-1_GL0089280	9601.18	10212.7	9660.76	8268.94	8510.38	8406.59	8188.76	8362.28	8067.22	6439.76	6524.58	6068.37	6378.19	NA	6488.62			Q8VC28	7310.51	6782.08	6476.45	6847.68	6410.07	6434.33	6518.38	5681.07	6149.02	5434.78	7311.62	6787.83	5548.82	4684.82	4421.72
1-1_GL0089280;1-8_GL0020049;28_GL0098734;MC-0-1_GL0058729	NA	40048.6	NA	43390.5	41822.1	31346.9	40367.9	32871.9	46730.7	25565.3	25094.2	23368.1	37066.9	24657.1	29257.8			Q8VCA5	2169.16	1586.75	1909.5	1460.83	1872.84	2060.37	1840.03	2444.53	1370.05	1684.35	1720.57	1792.47	NA	NA	NA
1-1_GL0089280;28_GL0098734	24379.8	20187.3	21192	26808.6	21761.6	25287.8	26108.2	20708.2	25743.6	26265	24513.1	17191.3	22253.2	21471	24042.5			Q8VCC2	2794.1	3140.09	3099.64	2281.07	2224.38	2493.96	2356.79	NA	2239.76	NA	NA	NA	NA	NA	NA
1-1_GL0089286	4582.21	4677.41	4400.48	3835.56	3424.04	3011.67	3255.45	3467.08	2922.84	NA	3353.34	NA	NA	NA	NA			Q8VCH6	NA	NA	3395.35	NA	NA	NA	2689.89	2447.34	2495.22	NA	NA	NA	NA	NA	NA
1-1_GL0089402	3369.56	3033.63	2877.63	2197.51	2408.27	2501.93	2861.12	2848.35	2548.4	1684.2	NA	NA	1420.03	NA	NA			Q8VCI0	15783.4	14505.8	14340.5	14366.5	14818	14709.6	14776.3	14566	13819.8	13942	14495.3	14841.8	16871.5	15087.5	14898.5
1-1_GL0089402;1A-dyr4-07_GL0100089;2-1_GL0019334;5-2_GL0033754	66642.6	76755	70963.7	45281.9	39599.6	35571.3	66074.6	72667.2	76405.3	77086	70713.3	79239.1	80720.5	69312.8	72943.9			Q8VCK7	14735.6	14357.9	14101.9	15735.7	15380	17435.4	16268.4	17816.2	15822.7	14078.1	14947.9	12664	19490.3	15144	NA
1-1_GL0089402;2-1_GL0019334;23_GL0125801;5-2_GL0033754	33218.1	33996.3	33627.5	36829.8	41013.4	42022.2	41436.4	42428.8	46744.3	45498.5	47977.7	43860.7	38178.2	34655.8	31124.1			Q8VCN5	23313.6	21151.3	21013.2	24739.6	24168.2	24563.5	25677.8	27144.7	26203.2	27312.8	23727.3	24894.8	22424.7	26717.4	23983.2
1-1_GL0089402;2-1_GL0019334;5-2_GL0033754	26494.9	26202.7	44053.4	65297.4	60339.7	62323.8	57213.5	60506.4	60318	62609.9	48388	53679.8	62179.4	49999.3	58522.8			Q8VCT4	2152.24	2264.22	2105.75	2915.01	3060.96	2786.6	2199.75	3134.2	2806.49	NA	NA	NA	NA	NA	NA
11_GL0090262	5034.3	5048.4	5328.2	5012.99	4766.97	4701.33	4312.23	4797.78	4733.67	5530.74	4014.66	7539.68	3479.09	4520.46	NA			Q8VCW8	5310.14	5593.56	5229.38	5567.37	5380.43	5665.52	4716.16	5207.18	4808.38	5033.46	5271.32	4409.03	4252.94	4735.46	5169.79
11_GL0090262;1A-dyr5-06_GL0025300;2-3_GL0091942;3-4_GL0031004;5-8_GL0077176;5-8_GL0150376;6-4_GL0100149;6-5_GL0067061;Group2-3A_GL0191651;Group2-8A_GL0039054;MC-0-1_GL0005167;MH-6-3_GL0063170;MH-6-4_GL0154984;S-Fe12_GL0093100;S-Fe20_GL0105983;S-Fe2_GL0058673;S-Fe9_GL0276065	95433.5	117543	80308.7	423737	402535	396066	NA	401541	394437	NA	NA	NA	NA	NA	353061			Q8VDD5	13645.1	13257.7	13550.9	14027.2	13524	13706.3	13896.8	13989.2	14314	13185.7	13424.2	13027.1	13432	11471.9	13863.7
1-1_GL0090503	1582.35	2169.24	2029.03	1438.7	1547.9	1803.18	1593.68	1623.67	1302.76	NA	NA	NA	NA	2451.93	NA			Q8VDN2	49350.8	51090.1	51154	50200.4	49548.6	50847.8	49761.2	50633.3	49864.4	49000.5	49981.6	49428.7	47285.1	46963.8	49845.6
1-1_GL0090503;1-7_GL0003362	2324.95	2593.45	2015.78	1836.1	1727.9	2223.08	1699.64	2137.64	1369.88	NA	NA	NA	NA	NA	NA			Q8VDN2;Q9Z1W8	9542.1	11510	8310.43	36206	35595.6	34130.1	35568.8	30185.2	33877.7	27376.8	NA	NA	31565.4	NA	23932.9
1-1_GL0090503;G1-5A_GL0188387	2531.42	3240.29	2887.59	NA	NA	NA	NA	NA	NA	NA	NA	NA	NA	NA	NA			Q8VE70	NA	NA	4780.8	2095.4	NA	NA	2841.15	NA	2828.21	NA	NA	NA	NA	NA	NA
1-1_GL0091390	8786.92	7682.29	5405.05	13107.5	12116.3	12215.5	13217.5	13455	14356.3	15441.5	16080.3	16881.2	16526.5	15059.8	15211.7			Q8VEK0	895.841	1099.35	1254.41	955.032	996.374	674.863	1107.39	NA	665.08	NA	1297.02	NA	NA	NA	NA
1-1_GL0091390;2-2_GL0107972	8175.5	NA	6998.3	NA	NA	NA	NA	NA	NA	NA	NA	NA	NA	NA	NA			Q8VEK3	8529.88	7092.24	7917.8	7687.58	6963.18	5518.14	7927.54	7360.95	6524.42	NA	NA	NA	NA	NA	NA
1-1_GL0091513	20225.9	19645.6	20119.1	17076.7	19201.8	16092.2	17130.6	17869	15511.8	11267.6	9810.17	8010.11	10917.9	8574.1	9240.35			Q8VEM8	53687	50883.2	51611.5	57538.1	57060.1	55277.2	55340.7	54167.1	53047.9	63020	63497.2	64749.6	67845.1	60666.8	67039.8
1-1_GL0091513;14_GL0090199;37_GL0016532;MC-0-1_GL0022870;MC-6-3_GL0041016;MH-0-3_GL0068860;S-Fe10_GL0056937;S-Fe10_GL0134058;S-Fe10_GL0143701;S-Fe11_GL0043926;S-Fe12_GL0013137;S-Fe13_GL0093499	1595.85	1713.53	NA	8260.53	9224.45	11048.7	12644	12466.2	13147.5	28974.9	30433.9	24397.4	24675.8	34078.2	25170.7			Q8VEN2	5290.3	6533.45	7499.23	5157.45	5005.65	5179.45	5206.68	5695.77	5261.41	4825.92	NA	NA	NA	NA	NA
1-1_GL0091513;37_GL0016532;MC-0-1_GL0022870;MC-6-3_GL0041016;MH-0-3_GL0068860;S-Fe10_GL0056937;S-Fe10_GL0143701;S-Fe12_GL0013137;S-Fe13_GL0093499	63327.1	66147.2	64825.4	61965.9	61133.8	59446.5	62731.8	59416.8	58315.4	64566.6	61968.5	54278.3	52205.7	56619.6	57092.8			Q8VHF2	123547	137638	127619	151999	153899	155305	157580	153520	156704	140077	135965	131276	133699	133212	135231
1-1_GL0091513;MC-0-1_GL0022870;MH-0-3_GL0068860;S-Fe10_GL0143701	45949.5	39321.7	29347.6	35500.6	38483.3	36451.1	34048.6	37464.7	38369.1	29793.7	28913.2	27741	30540.1	31205.1	30573.5			Q91V76	22877.3	22881.6	23938.6	23361.6	25408.3	25100.6	24845.9	22697	23516.8	20551.9	19862.1	23054.6	19632.2	22619.4	19214.8
1-1_GL0091513;MC-6-3_GL0041016;S-Fe12_GL0013137;S-Fe13_GL0093499	55458.6	46252.3	40044.3	35351.9	38124.4	33998.4	47031.7	34402.3	43701.1	16148	12425.1	12935.1	NA	9436.25	9157.56			Q91V92	4435.6	4206.7	4232.35	4142.01	4246.44	4516.22	4148.85	3701.27	3682.43	4901.35	NA	4290.83	NA	NA	NA
1-1_GL0091757;4-1_GL0026029	5129.46	4217.2	4357.36	NA	NA	4723.61	5367.1	NA	5628.63	NA	NA	NA	NA	NA	NA			Q91VA1	51062	52034.2	50563	52641.1	53839.6	57833.9	51800.8	57307.5	54580	55732.9	54690.1	54831.5	52331.6	48059.6	47164.8
1-1_GL0091838;MC-0-1_GL0035093;MH-6-3_GL0025839;MH-6-3_GL0061014	20053	23462	27355.1	19819.3	25898.5	22171.1	NA	NA	NA	NA	NA	NA	NA	NA	NA			Q91VC3	5579.27	6562.66	5901.22	6228.13	6572.48	6647.34	6845.49	7273.67	6922.1	8157.93	7486.34	NA	7167.07	6104.47	7329.27
1-1_GL0091838;MH-6-3_GL0025839;MH-6-3_GL0061014	10939.6	10502.2	10687.9	10884.5	12527.6	10934.9	11106.6	11156.3	NA	7031.08	8697.17	NA	NA	3951.04	5057.36			Q91VC9	3719.61	NA	3894.87	NA	NA	NA	NA	NA	NA	NA	NA	NA	NA	NA	NA
1-1_GL0092522	6813.53	3637.62	5334.08	4700.91	4867.3	4043.83	4790.49	4879.74	4889.14	2001.47	3089.77	2164.45	3427.51	1502.43	5122.32			Q91VD9	7517.06	7768.27	6878.83	8205.71	8532.29	8287.14	7891.3	8612.71	7699.33	7883.93	8251.28	6700.45	8566.45	6145.1	7994.33
1-1_GL0092522;1A-dyr4-07_GL0009722;4-4_GL0083540;5-6_GL0015745;6-5_GL0072187;7-5_GL0167262;G1-1A_GL0021347	64531.1	76293.6	29229.4	89150.4	85046.3	99259.2	57182.1	70348.8	54026.5	57571.1	65533	47762.5	58033.8	56703.8	58331.8			Q91VI7	2450.22	2939	2599.83	3905.3	3497.69	3654.08	NA	3067.51	3175.64	NA	NA	NA	NA	NA	NA
1-1_GL0092522;2-3_GL0002598;2-3_GL0015512;3-5_GL0005950;5-6_GL0015745;7-8_GL0106456;G1-1A_GL0021347;G1-5A_GL0103365;Group2-8A_GL0153883;MC-6-2_GL0001188;S-Fe9_GL0255628	195642	188348	184405	194162	208638	224487	218551	225938	236065	225654	194149	211089	214768	200156	194081			Q91VM9	776.76	860.795	864.523	1107.87	NA	NA	NA	NA	NA	NA	NA	NA	NA	NA	NA
1-1_GL0093040	4443.08	4846.03	4770.79	5440.04	6410.6	6494.99	5518.88	6221.56	5426.01	9447.62	7908.22	6729.31	7332.05	5847.13	6738.8			Q91VR2	11425.7	11390.7	11039.8	16470	15711.5	16268	18979.5	19854.6	19921.5	14751.5	15237.3	16994.4	16034.7	14029	13052.2
11_GL0093118	15585.5	16461	14924	NA	NA	NA	NA	NA	NA	NA	NA	NA	NA	NA	NA			Q91W90	2054.61	1977.83	1724.63	1173.62	1547.41	1191.61	1721.59	1453.5	1278.24	NA	NA	1483.5	NA	NA	NA
1-1_GL0093225	3831.84	3745.4	4068.77	3148.04	3686.74	4757.61	4514.03	4098.52	3778.4	3585.56	4164.37	3601.08	2831.75	NA	2326.38			Q91WD5	4389.76	3449.09	4120.45	3922.51	4062.75	4839.36	3857.3	5002.28	5200.46	4931.45	NA	NA	NA	NA	NA
1-1_GL0093572	11103.6	10998.8	11333.1	11318.9	11232.2	11545.7	10269.2	11231.2	11267.5	11275.6	11570.8	11415.2	12223	10789.7	11429.6			Q91WG0	81558	97059.5	88595.7	101437	104407	105159	92944.6	97296.9	104421	71845.3	71460.1	72243.2	62512.7	69986.5	67501.6
1-1_GL0093572;MC-6-1_GL0083294;MC-6-2_GL0180851	NA	NA	NA	23211.1	24448.6	23114.7	22522.3	21935	22032.4	22336.1	24414.9	18765.6	19232.3	23864.3	18926.7			Q91WG8	2360.04	2337.28	2077.53	2666.4	2485.66	2664.21	NA	2505.9	1912.36	NA	NA	NA	NA	NA	NA
1-1_GL0093739	25602.6	25256.8	25042.8	23197.8	22786.7	24228.1	22019.2	21811.7	20600.7	21775.1	19600.1	20589.6	24032.9	18499.9	19271			Q91WL0	16220.3	17893.7	18325.9	17889.7	14788.8	17247.2	18412.8	16672.5	20621.1	22562.9	18051.5	23443	27118.2	20961.4	23088.6
1-1_GL0093801	8077.01	10924.6	10577	8423.26	9117.63	9191.05	11759	11492.1	11719.5	8258.8	9248.04	10592.5	6771.15	12337.3	9953.12			Q91WP6	11538	11958.1	11587	14290.5	14036.7	13722.2	13845.2	13142.3	13476.4	11141.5	12234.3	10999.4	14015.5	10910.6	11973
1-1_GL0093801;2-3_GL0098550;3-7_GL0044062;5-8_GL0038230;MH-6-5_GL0035055;S-Fe8_GL0284158;S-Fe9_GL0112465	6737.47	7278.19	7685.92	7744.79	10175.2	12264.4	6256.68	5123.35	7761.06	NA	NA	NA	NA	NA	NA			Q91WS2	1135.96	NA	1310.16	NA	NA	NA	NA	NA	NA	NA	NA	NA	NA	NA	NA
1-1_GL0093801;3-7_GL0044062	4105.04	3028.16	3195.16	2838.5	4812.78	3082.16	2516.31	3414.18	2247.3	NA	NA	NA	NA	NA	NA			Q91WU0	9040.64	9805.23	9260.67	9884.4	9321.38	9765.83	8320.75	8869.79	9881.83	5769.98	7468.66	6629.03	NA	6600.32	NA
1-1_GL0093801;5-8_GL0038230;MH-6-3_GL0111643;S-Fe8_GL0284158	10352.2	12358.7	11553.6	10816.8	11283	10670.2	7776.94	7782.76	8408.21	NA	6072.11	NA	NA	NA	NA			Q91WV7	60429.4	55640.1	61300.8	56570.4	56754	54273.1	55720.6	56803.9	54276	46488.6	48600	54573.7	49006.8	47110.9	52634.8
1-1_GL0093801;MH-6-3_GL0111643	3379.94	3085.23	3672.05	10738.7	7497.88	NA	NA	18003.8	20719	NA	16492.2	NA	NA	NA	NA			Q91X17	10179.8	10224.6	9961.96	9823.9	10207.5	9454.96	10515.3	10674.9	10268	8186.09	9949.3	10933	10907.3	12732.5	12441.5
1-1_GL0093937;1-2_GL0084271;S-Fe10_GL0020184;S-Fe12_GL0037999	11363.6	11040.1	10733.7	14614.4	NA	NA	NA	NA	15536.2	NA	NA	NA	NA	NA	NA			Q91X72	8885.54	8326.77	6722.12	7190.75	7543.74	6667.31	7167.3	9141.07	9680.62	8367.02	10788.7	8293.17	9679.59	9625.97	9520.18
1-1_GL0093937;7-7_GL0086641;S-Fe10_GL0020184;S-Fe12_GL0037999	3591.4	3148.79	NA	9708.51	9687.56	9174.25	8341.58	7359.22	8301.88	7787.95	6408.35	6884.72	6641.74	6358.3	8445.56			Q91X78	1126.92	1236.32	1175.21	NA	NA	NA	NA	NA	NA	NA	NA	NA	NA	NA	NA
1-1_GL0093937;S-Fe12_GL0037999	5777.04	6049.53	5360.23	5588.28	4468.39	4913.67	4254.78	4150.66	4354.92	NA	NA	NA	NA	NA	NA			Q91X79	596300	549748	543707	516594	478507	508331	505429	522057	526921	376875	418301	334230	410773	380372	438333
1-1_GL0094467	5853.66	5313.03	5704.18	6223.89	6810.98	6035.97	6213.97	5633.08	6062.26	6384.65	7714.44	4643.66	NA	NA	5241.27			Q91X79;Q9CQ52	120369	111421	112493	NA	NA	NA	NA	NA	NA	NA	NA	NA	NA	NA	NA
1-1_GL0094651	1455.63	1346.42	1633.18	1615.57	NA	NA	NA	1613.21	1291.86	NA	NA	NA	NA	NA	NA			Q91XA2	1453.43	1543.48	1638.04	1376.32	1721.4	1206.56	1378.55	1523.14	1142.96	1427.32	NA	1303.5	NA	1028.06	1467.37
1-1_GL0094844;41_GL0100954;47_GL0084449	1907.81	1813.94	2110.85	1390.44	1274.62	1424.69	1112.07	1364.74	1156.2	745.968	NA	NA	907.359	NA	1339.46			Q91XA9	695853	602544	583709	530259	490789	515779	495840	489821	549392	545518	520501	481043	561964	542277	476424
1-1_GL0094844;47_GL0084449	6388.6	5535.27	6381.86	6400.53	6735.53	5654.86	6129.51	5920.34	5993.38	6747.14	5465.8	6882.82	6439.39	NA	NA			Q91XE4	3670.66	4167.07	3363.6	NA	NA	NA	NA	NA	3636.06	4904.46	NA	NA	NA	NA	NA
1-1_GL0095104	161587	137545	149626	139428	139936	135489	143108	144133	147180	127955	125118	126743	149851	125809	120963			Q91Y97	11103	11084.3	11070.8	10359.5	9163.77	9333.18	9813.47	9570.94	9707.78	11416.6	12979.8	10593.7	11903.5	9365.36	10066.7
1-1_GL0095104;1-1_GL0128445;1-3_GL0102532;29_GL0067888;MH-6-5_GL0183530	112689	106404	108907	197554	198123	186772	187342	185464	183944	177343	199512	188433	190015	192621	177663			Q91YQ5	5806.59	6302.75	7362.12	7398.97	7274.71	7417.03	8192.05	8100.67	8516.81	8689.58	9866.98	10199.2	8791.48	8260.09	8484.55
1-1_GL0095104;17_GL0105836;22_GL0076169;5-8_GL0139456	NA	NA	NA	NA	NA	NA	NA	NA	30869.4	NA	NA	NA	NA	NA	NA			Q91YT0	11285.7	11002.4	10280.4	10862.7	11506.1	11691.8	12672.6	13372.5	12235.5	12360.6	13806.6	11910	12480.4	14388.2	12544.4
1-1_GL0095104;17_GL0160550;4-2_GL0053150;8-5_GL0071861;MH-6-3_GL0042795;MH-6-5_GL0183530;S-Fe2_GL0195698	45227.5	49435.6	45565.9	NA	NA	NA	27637.5	27704.2	14256.5	NA	NA	NA	NA	NA	NA			Q91ZA3	2554.6	2447.06	2616.83	2150.78	2063.11	2491.85	1656.53	1673.26	2067.85	2069.69	1697.55	NA	NA	NA	1028.68
1-1_GL0095104;22_GL0076169;5-8_GL0139456	32732.7	26681.9	34470.5	29002.2	27314.5	27089.2	26232	21871.3	26283	27172.6	26317.7	22757.4	24119.7	22561.6	23550.9			Q91ZE0	2483.23	2354.71	2642.38	1943.86	3561	2942.74	NA	NA	NA	NA	NA	NA	NA	NA	NA
1-1_GL0095104;5-8_GL0139456	3957.55	1914.95	NA	8245.9	8329.32	8298.32	13777.9	13418.9	14434.5	17574.4	15111.5	13139.9	NA	NA	13800			Q91ZJ5	4141.34	4324.12	4720.6	4172.52	4151.62	4376.85	5183.98	5103.37	5346.92	4264.41	4989.27	4901.48	NA	6041.27	4120.04
1-1_GL0095242	7905.77	14005.4	12868.3	25307.9	27447.8	26502	26698	22600.5	23339.2	20786.7	22486.6	19022.3	16458.7	17756.8	NA			Q91ZX7	7052.45	7320.05	7577.61	6858.6	7562.65	7537.68	7320.78	7938.1	8193.33	12006.4	NA	NA	NA	NA	NA
1-1_GL0095657	56782.5	52008.4	52613.6	35752	45391.9	NA	59056.1	42371.6	31884.4	NA	NA	NA	NA	NA	45307.3			Q921G7	11272.6	11251.4	11778.2	10784	11046.9	10747.9	10202.6	10677.4	11008.6	12420.8	10256	9429.51	8245.5	7745.49	8854.64
11_GL0095758	5075.81	5901.32	5900.01	5349.37	5350.65	5521.65	5523.65	5909.67	4786.93	5525.11	4726.31	4798.93	3813.17	3166.73	4895.09			Q921H8	818.85	680.028	688.779	541.762	740.615	359.973	1054.37	641.615	NA	NA	NA	NA	NA	NA	NA
11_GL0095770	6569.79	6298.05	6448.41	6121.56	6405.38	6315.1	6560.45	6844.8	6627.76	5590.91	6803.62	5541.81	5359.81	4815.26	4875.26			Q921I1	41404.7	40865.5	41596.3	47155.6	46866	47076.5	47776	46736.2	44650.9	48182.9	50322.1	44316	43629.1	44691.7	42312.6
11_GL0095772	6681.37	6329.02	6420.94	5524.54	5309.04	5576.8	4564.48	4898.29	4629.21	4336.78	4544.6	4304.36	4663.73	5600.38	4464.26			Q921M3	NA	NA	1553.15	1558.29	NA	NA	NA	NA	NA	NA	NA	NA	NA	NA	NA
11_GL0096011	31910.3	32880.9	30402.8	39646.1	37421.9	37195.7	42724.8	43322.7	42412.9	40995.5	41187.2	40660.6	41833.7	37498.2	38865.1			Q922D8	1436.4	1509.43	1501.15	1301.27	NA	NA	853.047	NA	NA	NA	NA	NA	NA	NA	NA
11_GL0096011;2-1_GL0072207;2-1_GL0097178;2-3_GL0000992;5-1_GL0024858	NA	17677.6	16528.4	63492.3	59176.2	59617.2	NA	68946.6	69387.3	80939	73739.5	74210.2	101447	79873.7	73167.3			Q922H4	586.793	611.135	705.176	666.732	NA	933.372	NA	NA	788.74	NA	NA	NA	NA	NA	NA
11_GL0096011;5-1_GL0024858	3958.57	4207.95	4020.42	4624.34	4347.25	2783.13	6387.38	7217.26	6792.93	NA	NA	NA	NA	NA	NA			Q922Q1	3634.15	3998.86	3155.93	3701.7	3741.51	3784.59	4119.36	3943.27	2559.84	NA	NA	NA	NA	NA	NA
1-1_GL0096134;10_GL0063529	13169.2	13796.8	13148.5	11493.4	11752	9925.38	10943.1	10243.3	9585.39	5232.63	7541.43	4985.71	10163.2	NA	6548.14			Q922R8	3487.34	2911.31	3105.17	3256.28	3374.26	3962.41	4044.87	4057.62	4509.97	NA	3136.73	4327.93	5789.52	4249.15	NA
1-1_GL0096137	17913.3	16963.1	18396	17613.1	17441.8	17542.7	18686	17846.1	16033.6	13611.5	16999.8	14035.6	17811	NA	17333.4			Q922U2	15285.1	15783.1	15779.3	19687.7	19716.7	19230.3	17812.5	17702.4	16263.1	20512	15528.9	19409.9	15413	15410.3	17599
11_GL0096306	4907.16	4586.13	4949.78	3909.5	2514.93	4151.82	4255.4	3665.81	3892.22	2653.13	NA	NA	3994.94	NA	NA			Q924M7	1974.09	2165.2	1841.55	1839.36	1672.86	1431.63	1709.2	842.84	2018.56	NA	NA	1793.55	NA	NA	NA
11_GL0096306;1_GL0086842;2-1_GL0103739;2-5_GL0069395;4-1_GL0068194;5-3_GL0111435;5-5_GL0069737;7-8_GL0033212;G1-1A_GL0051997;S-Fe12_GL0080717	NA	NA	NA	11271.5	11711.8	10271.7	10521.2	9414.96	9015.49	NA	NA	11616	NA	NA	NA			Q93092	7144.94	8297.12	7709.93	7698.38	7760.1	7277.6	7269.42	7237.92	7595.72	7861.41	8557.19	6700.97	6570.58	5255.77	7226.25
11_GL0096306;1_GL0086842;2-1_GL0103739;2-5_GL0069395;4-1_GL0068194;5-3_GL0111435;5-5_GL0069737;G1-1A_GL0051997;S-Fe12_GL0080717	14127.4	10886.2	10950.9	28166.3	34847.6	29802.7	NA	NA	NA	NA	NA	NA	NA	NA	NA			Q99020	1385.85	1833.06	1790.76	NA	NA	NA	NA	NA	NA	NA	NA	NA	NA	NA	NA
11_GL0096306;4-1_GL0068194	5159.75	4983.27	5068.12	4330.55	4248.1	4273.3	4125.52	4029.03	3703.89	3877.71	3712.14	2814.83	3979.71	NA	3869.48			Q99J47	3374.22	3592.28	3674.7	3599.89	4342.57	4783.52	3736.33	4054.95	3905.91	NA	NA	NA	NA	NA	NA
11_GL0096768;11_GL0136132;2A-dyr14-07_GL0018422;4-5_GL0109726;4-6_GL0053848	10886.5	11364.9	10783.9	12059.8	10743.2	11432.2	10592.2	10924.3	11615.8	11454	13689.5	9813.27	10811.8	11535.4	10291.7			Q99J77	4077.87	4049.52	4622.96	3871.18	3302.41	3599.29	3740.21	3750.07	3256.22	3728.3	2843.76	3260.78	2852.4	2989.48	3084.84
1-1_GL0097306	16026.2	16561.7	16728.8	15326	16724	16234.6	17288.2	16629	17102.3	15211.7	13874.6	NA	13451.1	14272.6	NA			Q99JG3	24706.4	22166.2	22952.6	28718.1	26863.9	25156.7	35138.3	34901.7	35681.7	37152.7	33354.8	36873.1	40420	44426.3	41258.2
1-1_GL0097306;MC-6-2_GL0121460;MC-6-3_GL0067685	25735.5	23073	23135.9	21368.4	21408.5	22514.1	23780.9	22690.4	23009.2	24532.8	22159.4	20188.2	21140.1	18182.8	21086.7			Q99JW2	3574.07	3905.3	3384.03	3963.24	3646.11	NA	3819.19	3897.54	4024.51	NA	NA	NA	NA	NA	NA
1-1_GL0097453	18117.7	22948.6	19009.9	49867.2	45341.4	46488	55437.5	53679.7	50197.2	58708.1	68497.3	66502.2	59924.2	54925.4	53018.6			Q99JW5	3934.77	3735.65	5123.71	3876.05	5189.25	4070.71	4761.76	5042.89	5142.71	5645.8	5225.49	3602.77	5078.63	4069.19	5533.71
1-1_GL0097533	19757.7	17486.6	16631.4	17475.9	15930.4	16072.1	15094.2	16107.2	16405.8	16334.2	13798.1	10976.4	NA	NA	15953.2			Q99JX3	541.713	482.449	463.771	NA	385.172	NA	NA	NA	NA	NA	NA	NA	NA	NA	NA
1-1_GL0097533;1-1_GL0138491;1-2_GL0106369;10_GL0025698;2-1_GL0068363;2-2_GL0154178;2-3_GL0004587;3-1_GL0054518;4-1_GL0033909;5-8_GL0102626;54_GL0082039;8-3_GL0010235;G1-1A_GL0023674	4908.94	5459.42	4822.05	NA	NA	NA	NA	NA	NA	NA	NA	NA	NA	NA	NA			Q99JY0	7686.17	7008.53	6953.47	9043.45	9044.32	9031	9349.3	9615.03	9197.57	9185.73	9543.05	8551.6	10931.6	9619.85	9442.64
1-1_GL0097533;1-2_GL0056317;5-8_GL0063331;7_GL0094385;G1-1A_GL0023674	57596.1	50879.8	51098.6	4737.53	26896.3	NA	19461.4	12999.4	48524.9	55899.3	58926	60679.4	50053.5	52190.9	55149.2			Q99JY9	6024.53	6290.71	6213.99	7958.02	9465.94	8524.72	7117.51	6411.55	6267.37	8087.58	7278.28	6038.34	NA	6574.11	6676.34
1-1_GL0097533;1-2_GL0106369	4142.83	3748.72	4291.12	3936.74	2951.55	3472.59	3350.4	2984.18	5182.41	NA	NA	NA	NA	NA	NA			Q99JZ0	5185.01	6007.08	5801.92	8064.49	9136.29	7785.95	8006	6098.02	7440.02	6595.56	NA	NA	6396.86	NA	NA
1-1_GL0097533;1-2_GL0106369;10_GL0025698;4-2_GL0043523;5-8_GL0102626;G1-1A_GL0023674;G1-5A_GL0104085;MC-6-2_GL0178191	17905.9	18096.4	16372.9	18343.5	19418.1	12669.3	16488.6	17177.4	17887.3	13008.2	13301.3	9585.31	10344.2	10121.7	6188.72			Q99K01	2158.8	2943.37	2760.09	3181.02	3112.33	2982.58	3120.46	2784.16	NA	4783.83	NA	NA	NA	NA	NA
1-1_GL0097533;1-2_GL0106369;10_GL0025698;4-2_GL0043523;G1-1A_GL0023674;G1-5A_GL0104085	56776.4	59076.7	54256.7	70782.2	71457.9	68034.5	71294	74069.1	73905.3	59453.2	61564.5	59962.4	58343.4	51667.6	54600.2			Q99K30	4954.26	5103.18	5079.74	4731.45	4790.52	4912.5	4025.72	4600.27	4022.75	2708.61	4067.37	3626.71	NA	4023.43	NA
1-1_GL0097533;1-2_GL0106369;10_GL0025698;7_GL0094385;G1-1A_GL0023674	66950.6	62427.3	67706.3	106369	110458	98233.8	116253	102249	105857	116351	114610	101654	132328	120957	116498			Q99KB8	10108.4	11617.3	10534.6	12920.6	13117.1	11066.9	13495.6	11588.4	11499.3	12303.5	13134.9	13583.4	10355.2	12265	15730.9
1-1_GL0097533;1-2_GL0106369;7_GL0094385;G1-1A_GL0023674	36227.8	34935.8	38901.8	28796.8	37434.3	24813.9	26027.1	31882.8	32049.5	17344.2	17260.2	12562.4	10721.6	10639.1	13454			Q99KC8	1906.99	2028.16	1623.99	1860.74	1773.8	1518.49	4377.42	1790.12	2227.33	NA	NA	NA	NA	NA	NA
11_GL0098946	4478.9	4329.19	4267.4	3970.83	4017.66	3361.76	3797.54	3147.94	3330.02	NA	NA	NA	NA	NA	NA			Q99KE1	8062.07	7355.42	7856.61	7944.51	9745.92	8488.07	8179.12	7127.58	8075.16	7700.5	8908.38	8598.94	11241.4	7633.28	NA
11_GL0099037;4-1_GL0037845	3812.78	3131.66	4047.35	2682.5	2690.18	NA	NA	NA	NA	NA	NA	NA	NA	NA	NA			Q99KF1	4395.13	3937.83	4474.59	NA	3244.28	3947.41	3206.42	4191.49	4484	NA	NA	NA	3985.6	NA	NA
1-1_GL0099353	2424.74	2598.38	2533.62	1785.13	2238.3	1928.04	1728.26	1819.28	2137.59	2333.15	1448.62	1492.07	1273.95	3001.18	874.549			Q99KG5	3272.43	7702.55	6422.55	4169.18	2172.31	2749.81	2003.65	2285.15	2904.87	1792.47	NA	1685.39	NA	NA	NA
1-1_GL0100030	7930.15	8125.23	8412.05	10064.5	9732.65	10044.3	11427.5	12173.6	10610.5	9268.88	9190.39	11173.9	10109.6	9848.5	10517.8			Q99KI0	23905	24762.6	24560	24278.3	24699.8	25572.7	22997.9	22408.8	23657.2	22090.6	20734.2	22910.8	21392.4	19996.6	19371.7
1-1_GL0100152	9576.63	9648.6	9800.8	9224.86	9350.28	8573.81	9363.76	9609.02	9262.16	6996.93	5992.88	7383.02	5539.83	5838.77	5567.59			Q99KK2	4147.66	3974.38	3767.7	3460.44	3402.69	3490.22	3472.4	3599.09	3384.08	3388.47	3117.42	4129.15	3365.33	3476.8	2764.32
11_GL0100278	14023.6	13890	13219.8	15288.6	17437.6	16369.2	15769.6	16627.5	16822.9	17242.8	16059.9	16166.7	14750.2	14999.3	19620.6			Q99KN1	1364.36	1375.96	1281.56	1609.29	2163.07	2153.51	NA	2117.41	2443.28	NA	NA	NA	NA	NA	NA
1-1_GL0101353	6199.75	7148.02	6327.41	8925.55	9340.16	8766.77	10130.9	8937.97	9393.96	9013.61	9028.98	8839.41	7925.3	8974.58	8769.86			Q99KP3	7449.94	7336.75	8315.06	7460.58	7587.02	7730.19	8361.31	7135.01	7673.55	7934.45	7720.38	7974.55	8722.01	10954.6	11886.1
1-1_GL0101438	49000.4	42174.7	46428.2	65783.7	57763.5	63965.6	56430.1	54480.3	62267.3	31101.7	35009.7	25757.7	37284.6	28507.1	37358.3			Q99KV1	1272.82	1409.49	1347.35	1164.25	NA	825.577	1426.62	1028.43	NA	NA	NA	NA	NA	NA	NA
1-1_GL0101438;1A-dyr2-07_GL0000594;1A-dyr4-07_GL0054230;2-1_GL0005243;2-1_GL0006967;2-1_GL0062493;2-3_GL0085873;2-3_GL0103226;2-8_GL0109886;20_GL0105798;25_GL0094012;26_GL0078522;3-3_GL0100994;3B-dyr36-06_GL0050063;4-1_GL0062101;4-1_GL0079690;4-3_GL0017430;4-7_GL0128250;5-2_GL0000467;5-2_GL0096356;5-3_GL0001944;5-6_GL0003735;5-8_GL0008035;6-4_GL0092622;7-8_GL0114515;8-2_GL0127477;G1-1A_GL0037478;…	NA	NA	8311.73	434102	418322	380712	466252	465122	469598	141565	139580	93534.3	187325	162005	145569			Q99L13	2839.71	3038.62	3217.98	1908.17	2307.53	2561.17	NA	NA	2305.06	NA	2457.75	2940.83	1920.7	2597.02	NA
1-1_GL0101438;2-1_GL0006967;2-1_GL0062493;2-3_GL0085873;5-2_GL0000467;5-8_GL0003525;G1-1A_GL0037478;G1-8A_GL0073811	4727.51	6622.84	6543.01	165135	207616	210596	224122	360986	NA	NA	NA	NA	NA	NA	NA			Q99LB2	NA	1790.94	1636.01	1986.14	2308.23	NA	NA	NA	NA	NA	NA	NA	NA	NA	NA
1-1_GL0101526	5286.02	6799.25	5579.91	4190.28	4203.09	3902.88	5805.11	5748.83	4622.32	NA	NA	NA	NA	NA	NA			Q99LC3	2784.29	2698.11	2814.05	2697.44	3205.81	2274.65	2592.9	4057.55	3148.65	NA	NA	NA	NA	NA	NA
1-1_GL0101526;1-1_GL0123184;3-1_GL0060298;5-2_GL0024084;G1-1A_GL0096667;MC-0-1_GL0020527;MC-6-3_GL0028761;MC-6-4_GL0043014;S-Fe10_GL0025322;S-Fe10_GL0157138;S-Fe11_GL0106313	35309.7	31157.9	32658.8	24876	25071.1	17701.9	22980.5	25745.7	24791.6	13783.2	12447.1	11045.4	14946.3	14423	13298.5			Q99LC5	14212.3	13754.9	14438.2	12364	11792.5	12925.9	12373.7	12944.6	12223.7	10322.1	9976.97	9018.1	11193.7	8061.7	12312.3
1-1_GL0101526;1-6_GL0007650;17_GL0057695;38_GL0136918;5-2_GL0024084;MC-6-3_GL0064023;MC-6-4_GL0043014;MH-6-4_GL0008319;MH-6-4_GL0037853;S-Fe20_GL0148071;S-Fe2_GL0192528;S-Fe6_GL0217629	15861.8	14932	14948.9	12050.4	10342.1	10751.2	9778.79	9631.88	11379.9	4298	5273	3189.17	5238.9	3679.24	3622.48			Q99LJ1	5240.46	5961.71	5338.01	5849.49	6327.11	6592.85	5806.41	5408.23	6750.05	6427.85	5329.23	NA	NA	4235.16	NA
1-1_GL0101526;1-6_GL0007650;MH-6-4_GL0008319	10452	10138.9	11319	12504.7	12305.5	11122	10118.1	9221.51	9574.17	7908.68	8477.74	8226.33	4988.55	5291.2	7059.75			Q99MN9	2377.5	1921.98	1829.37	2374.35	2067.64	2157.72	2189.2	2298.19	2250.46	NA	NA	NA	NA	NA	1319.63
1-1_GL0101526;5-2_GL0024084	7755.34	8306.16	7410	6193.63	7500.82	5671.4	4940.25	7346.69	7295.2	4404.19	3611.58	5357.71	3876.32	3147.88	3628.16			Q99MZ6	11968	11725.3	12245.9	12898	13022.4	12960.7	13807.7	13336.9	12940.6	11745.5	13870.2	12078.1	12204.7	13651.7	12064
1-1_GL0101526;MH-6-1_GL0001778	4210.6	3546.88	4161.68	3089.88	3083.16	2750.44	2510.18	2980.13	2663.73	NA	NA	NA	NA	NA	NA			Q99P58	1114.25	1153.51	1344.85	1343.46	1035.8	1138.33	NA	NA	NA	NA	NA	NA	NA	NA	NA
1-1_GL0102102	5566.73	4665.62	4455.76	5884.1	6670.28	6199.48	6070.81	6112.85	6163.07	4896.95	6504.45	7226.27	5895.09	7125.11	6532.08			Q99P86	58266.6	61836.9	58768.8	53429.4	56176.4	54200	52272.5	52968.2	52934	50282.9	46689.7	45271.4	44476.6	43577.7	51649.9
1-1_GL0102102;28_GL0001933;MC-0-3_GL0093876	7231.04	6616.89	7046.47	7389.07	6585.96	8332.1	6360.78	6582.4	7057.69	NA	7504.03	NA	5880.84	5893.42	NA			Q99PG0	2087.95	2153.84	2029.22	2471.06	2022.71	2374.7	NA	NA	NA	NA	NA	NA	NA	NA	NA
1-1_GL0102282;7-4_GL0011727;8-1_GL0133000	2599.41	2683.58	2945.41	NA	NA	NA	NA	NA	5384.96	NA	NA	NA	NA	NA	NA			Q99PT1	26911.5	24714.9	26097.3	20449.5	22259	24640	23447.2	21655.5	20385.4	17418.8	17188.9	15672	13694.1	18237	11774.3
1-1_GL0102282;7-4_GL0011727;8-1_GL0133000;MC-6-4_GL0010557	9676.6	9656.94	9853.71	12170.9	12915.2	12301	14116.8	11355.8	13025.6	13390.8	13547.5	13129.9	10729.6	12392.8	14554			Q9CPQ1	17966.3	19771.8	19007.8	25884.9	29246.7	NA	NA	24183.8	NA	NA	NA	NA	NA	NA	NA
11_GL0102458;4-7_GL0072954	2106.84	1794.83	2205.13	1752.66	1746.89	1741.74	1653.76	2078.09	2182.68	NA	1554.82	NA	NA	NA	1868.63			Q9CPQ8	20087.5	17660.3	16981.5	17905.2	15789.7	16333.6	12635.1	NA	9856.86	NA	NA	NA	NA	NA	NA
11_GL0102458;4-7_GL0072954;5-2_GL0058072	NA	8532.33	7880.38	NA	NA	NA	NA	NA	NA	NA	NA	NA	NA	NA	NA			Q9CPR4	NA	2729.44	2936.07	NA	NA	NA	NA	NA	NA	NA	NA	NA	NA	NA	NA
11_GL0102458;4-7_GL0072954;5-2_GL0058072;6-7_GL0103377	1050.86	1268.06	1045.68	722.457	NA	NA	NA	NA	NA	NA	NA	NA	NA	NA	NA			Q9CPU0	4843.56	5217.66	4351.64	5277.91	5647.88	5661.49	6777.34	6778.07	6677.12	7038.38	7205.57	7469.49	7274.01	7752.82	8915.87
11_GL0102613	42290	40998.8	37451.7	38913.4	39658.4	39990.2	37401.9	40311	36714	41566.9	37811.6	43695.9	35767.8	39840.6	39823.1			Q9CPU4	8442.22	9186.59	9939.28	7916.21	9175.84	10105.9	9270.66	9280.41	8294.64	NA	NA	NA	NA	NA	NA
11_GL0102613;2-2_GL0087128	221474	205509	209129	NA	NA	NA	NA	NA	NA	NA	NA	NA	NA	NA	NA			Q9CPV4	1327	1497.06	NA	NA	NA	NA	NA	NA	NA	NA	NA	NA	NA	NA	NA
1-1_GL0102656	2435.06	2131.43	2415.37	NA	NA	NA	NA	NA	NA	NA	NA	NA	NA	NA	NA			Q9CPW4	3522.01	3914.22	3175.37	NA	NA	NA	NA	NA	NA	NA	NA	NA	NA	NA	NA
1-1_GL0102656;2-3_GL0065534	5102.6	5512.07	5209.32	4813.26	4032.37	4459.65	4840.24	5122.64	3853.37	NA	1600.48	2332.05	NA	NA	NA			Q9CPY7	124328	130694	129243	133336	131474	134374	131498	130672	133405	112712	111755	113532	106447	110024	108091
1-1_GL0102656;2-3_GL0065534;31_GL0045860	9512.05	7565.25	7466.79	NA	10472.6	10845.6	NA	NA	NA	NA	NA	NA	NA	NA	NA			Q9CQ52	422603	462009	359865	374344	389669	400269	421011	426404	457495	434394	488197	574598	473212	468928	450960
1-1_GL0102656;2-3_GL0065534;31_GL0045860;6-2_GL0051644	15327	16234.2	17824.3	22459.8	20240	19293.5	23804.3	24954.5	26879	NA	NA	NA	NA	NA	NA			Q9CQ62	3981.42	4924.29	5476.19	5439.4	6112.84	5532.85	5040.78	5088.4	5952.29	5863.23	5750.07	3890.84	5826.1	6693.85	6152.64
1-1_GL0102656;2-3_GL0065534;6-2_GL0051644	22084.5	22893.6	19466	27168	26953	28247.2	29757.8	27422.1	31199.5	30663.3	29014.2	29588.8	39115	30850.9	24006.7			Q9CQ69	NA	2265.62	2003.94	NA	NA	NA	NA	5724.27	NA	NA	NA	NA	NA	NA	NA
1-1_GL0102656;31_GL0045860;6-2_GL0051644	3539.94	4084.1	4128.78	3189.37	3613.66	2632.47	2279.31	2754.69	2428.23	NA	NA	NA	NA	NA	NA			Q9CQA3	20279.2	20491.9	18296.1	18780.7	20025.4	19590.9	19425.1	20627.7	20555.3	18613.7	18349.3	19191.1	19444.3	19079.4	18929.9
1-1_GL0102656;6-2_GL0051644	3797.42	4204.34	4168.41	4414.68	4702.04	4330.93	NA	4059.86	4486.27	5504.78	NA	NA	NA	NA	NA			Q9CQB5	1643.51	1935.12	1711.87	1461.99	1209.33	NA	1603.64	NA	NA	NA	NA	NA	NA	NA	NA
1-1_GL0103073	4555.69	4180.48	4217.3	5689.46	5379.04	5156.66	4300.92	4074.09	4287.22	NA	NA	NA	NA	NA	NA			Q9CQC2	240214	98828.7	55435.7	256293	220688	409535	254782	354413	258842	367549	252566	244222	228318	169869	197858
1-1_GL0103334;2-1_GL0100791;6-2_GL0062533;7-1_GL0075240;G1-5A_GL0147092	1522.72	NA	1238.05	NA	NA	953.027	NA	NA	NA	NA	NA	NA	NA	NA	NA			Q9CQH3	3009.37	3108.96	2898.24	5056.05	4742.89	5551.66	5780.77	6442.33	5544.97	NA	NA	NA	NA	NA	NA
11_GL0103683	9901.83	10082.8	10047.4	7558.33	8233.36	6093.07	7772.53	7141.78	6534.89	NA	NA	NA	NA	NA	NA			Q9CQJ8	3700.51	3384.64	3561.31	NA	NA	NA	NA	NA	NA	NA	NA	NA	NA	NA	NA
1-1_GL0103727	13903.2	19934.6	NA	12180.2	10163.1	8844.47	10012.8	8513.07	8626.19	NA	5612.5	10091.7	NA	NA	11810.4			Q9CQM5	1279.15	740.158	1249.5	1834.74	1565.36	1530.01	1643.59	1579.24	1653.52	NA	NA	NA	NA	NA	NA
1-1_GL0103727;1-2_GL0047570;S-Fe9_GL0220525	6341.8	6044.13	5402.33	4077.42	3942.14	4411.86	3682.24	3821.93	3487.27	3256.11	3622.66	1477.21	4632.99	NA	4486.06			Q9CQN1	15813.5	17704.1	17072.2	NA	NA	NA	13145.2	NA	13595.7	NA	18499	NA	NA	NA	NA
1-1_GL0103727;17_GL0125692;1A-dyr4-07_GL0031946;1A-dyr4-07_GL0083332;4-1_GL0071382;6-7_GL0002413;7-5_GL0153411;S-Fe20_GL0078171	75530.1	77456	81443.2	NA	NA	NA	NA	NA	NA	NA	NA	NA	NA	NA	NA			Q9CQQ7	12114.2	12069.7	11270.8	14654.2	13488.5	13095.1	18060.5	14876.8	17395.3	NA	14620.4	13612.4	NA	15709.2	14133.2
1-1_GL0103727;20_GL0150260;8-2_GL0053421;S-Fe2_GL0088178	4255.31	5132.62	4502.35	NA	3956.94	4556.45	NA	NA	NA	NA	NA	NA	NA	NA	NA			Q9CQR2	NA	6511.36	NA	5888.48	4536.35	6030.33	NA	3829.05	5086.18	NA	NA	NA	NA	NA	NA
1-1_GL0103727;8-2_GL0053421;MH-6-3_GL0057767;S-Fe20_GL0145970	43835.4	49330.9	44124.9	57119.7	54006.8	58220.3	52010.6	48921.3	51856.2	62728	57042.8	58345.6	55041.2	51614.6	57510.5			Q9CQV3	5740.58	5536.92	6109.42	6345.31	6075.19	5970.44	7023.52	6466.12	6855.64	6369.44	6325.42	NA	4609.36	NA	NA
1-1_GL0103727;S-Fe20_GL0145970	9666.26	10377.4	10421.2	11184.2	8387.46	10840	6638.49	8496.15	10699.1	3280.02	3797.52	NA	NA	NA	3528.61			Q9CQV8	4531.34	4377.31	4325.42	3894.08	3827.85	3973.54	3978.68	3974.25	4115.98	3652.12	3411.13	NA	NA	NA	NA
1-1_GL0103727;S-Fe7_GL0142498	26672.2	24370.6	23444.8	15149.1	16074.4	15178.6	18451.3	21793.1	21179.5	NA	NA	NA	NA	NA	NA			Q9CQW2	4388.9	4981.4	6396.38	4778.54	5888.13	6335	5468.2	5130.86	6110.6	NA	NA	NA	7248.19	NA	NA
1-1_GL0103775;MC-0-1_GL0066732	19173.6	18574.8	18420.1	15426.9	15539.1	15782	16344.7	16582.8	16674.4	NA	NA	13022.3	NA	NA	10434.6			Q9CQW5	4024.31	4489.45	4796.15	3700.96	4982.27	4480.18	4032.24	3099.65	3076.85	3362.98	NA	3367.88	NA	2969.82	NA
11_GL0104030	12667.2	12766.7	12079.9	18857.5	19243.5	19547.3	18037.3	15968.2	15727.4	17590.6	16073.8	14391.1	15015	16076.6	14190.5			Q9CQX2	11100.2	7389.75	8486.92	NA	NA	NA	NA	NA	NA	NA	NA	NA	NA	NA	NA
11_GL0104167	12018.8	12186.8	11625.9	13871.1	14639.3	12786.2	14016.8	13055.4	12675.1	14214.4	14481.2	14169.6	13098.4	13582.3	9624.75			Q9CQY5	2973.14	2914.2	NA	NA	NA	NA	NA	NA	NA	NA	NA	NA	NA	NA	NA
11_GL0104167;23_GL0140512;4-7_GL0125984;6-7_GL0030818	10341.3	8600.51	9019.32	6262.34	5893.39	5619.24	3700.34	3560.68	3766.89	NA	NA	NA	NA	NA	NA			Q9CQY8	2802.32	3709.12	3297.33	3426.47	3536.54	3528.63	2844.83	3847.55	2618.41	4445.49	NA	NA	NA	NA	NA
11_GL0104167;23_GL0140512;6-6_GL0048311;6-7_GL0030818	7762.72	6546.22	7055.67	19823.9	27920.9	15301.6	71918.8	65865.7	69639.8	187203	NA	NA	NA	NA	NA			Q9CQZ6	4119.87	3922.91	3837.01	9071.86	9781.64	8662.31	10437.1	9397.03	8933.5	9153.71	9456.59	8442.01	8311.68	8610.48	8927.62
11_GL0104167;6-7_GL0030818	364039	354938	379977	337230	322756	340216	345595	338795	373848	359645	NA	NA	502099	NA	NA			Q9CR35	1.42663e+06	946794	1.05193e+06	1.56389e+06	1.36958e+06	1.04779e+06	1.52978e+06	1.78174e+06	1.61354e+06	735105	878624	792639	1.07344e+06	1.4917e+06	1.23876e+06
1-1_GL0104180	1937.38	1876.3	1889.82	1583.77	1446.94	1949.96	1570.75	1612.45	1444.77	NA	NA	NA	NA	NA	NA			Q9CR57	8640.25	8147.68	8352.02	9374.81	9201.24	8402.99	10222	9286.61	9917.1	NA	8364.18	NA	6834.78	NA	NA
1-1_GL0104331	3793.5	3663.34	3990.99	4477.16	4630.52	NA	NA	NA	2840.3	NA	3105.12	2693.21	2082.5	NA	NA			Q9CR61	7363.78	8606.84	8384.71	5711.69	4633.77	6819.25	NA	6600.09	4617.66	NA	NA	NA	NA	NA	NA
1-1_GL0104331;Group2-8A_GL0070902	2589.34	3538.93	2972.2	3069.81	2952.5	3524	4171.5	2527.08	3164.22	2886.94	NA	NA	NA	NA	NA			Q9CR62	2606.43	3261.57	3821.09	4502.76	4217.61	4887.29	4847.23	4504.17	4242.2	4916.91	NA	4448.36	NA	5343.01	NA
1-1_GL0104334	3607.36	3199.58	3418.85	NA	NA	NA	NA	NA	NA	NA	NA	NA	NA	NA	NA			Q9CR68	65344.7	60406.5	61038.9	71204.4	72632.8	71046.3	76724	67141.2	70128.5	71742	62690.3	62140.3	50015.7	57154.8	63733.1
1-1_GL0104334;10_GL0005938;10_GL0069978;11_GL0040234;2-1_GL0059292;2-2_GL0005186;2A-dyr16-06_GL0039105;2B-dyr19-06_GL0030623;3-2_GL0032488;6-2_GL0004768;7-2_GL0017231;7-6_GL0055493;8-2_GL0073909;G1-2A_GL0118566;G1-5A_GL0001850;Group2-1A_GL0049538;Group2-2A_GL0001900;S-Fe16_GL0050487;S-Fe3_GL0098237;S-Fe9_GL0216616;S-Fe9_GL0229166	NA	NA	NA	94058.6	87091.1	90939.8	77638.4	79253.5	71301.5	93599.1	92613.7	86533.4	91745.4	82938.3	78685.6			Q9CRB9	1117.63	1078.77	1242.91	NA	NA	NA	NA	NA	NA	NA	NA	NA	NA	NA	NA
1-1_GL0104334;10_GL0005938;10_GL0069978;11_GL0040234;3-2_GL0032488;5-2_GL0039094;6-2_GL0004768;7-2_GL0017231;7-6_GL0055493;8-2_GL0073909;G1-2A_GL0118566;G1-5A_GL0001850;Group2-1A_GL0049538;Group2-2A_GL0001900;MC-6-2_GL0089037;S-Fe16_GL0050487;S-Fe3_GL0039343;S-Fe3_GL0098237;S-Fe9_GL0229166	86525.2	75104.9	79294	72007	68945.3	73085.6	59978.3	65906.1	70385.5	56121.2	54083.5	47017.3	48454.3	44082.9	51584.2			Q9CRY7	6303.38	6242.72	5788.75	7409.51	7078.3	6550.8	6732.14	7190.94	6552.64	6614.91	5388.1	6947.79	6102.62	7529.24	6673.32
1-1_GL0104334;10_GL0069978;2-1_GL0059292;2-2_GL0005186;7-2_GL0017231;7-6_GL0055493;8-2_GL0073909;G1-2A_GL0118566;Group2-1A_GL0049538;Group2-2A_GL0001900;S-Fe16_GL0050487;S-Fe3_GL0098237;S-Fe9_GL0216616;S-Fe9_GL0229166	19898.7	16250.6	15218.8	NA	NA	NA	NA	NA	NA	NA	NA	NA	NA	NA	NA			Q9CVB6	3972.53	3739.99	4010.51	4038.67	4431.86	4391.8	4094.66	5157.65	3599.57	NA	NA	NA	NA	NA	NA
1-1_GL0104334;10_GL0069978;2-2_GL0005186;6-2_GL0004768;7-2_GL0017231;8-2_GL0073909;Group2-2A_GL0001900;MC-6-2_GL0089037	NA	22254.1	NA	30197	27688.8	26389.7	36008.8	37620.8	37818.9	32622.1	35238.4	30039.3	26318.1	31745.7	29328			Q9CWJ9	4922.27	5191.44	5212.14	5100.42	4778.88	3934.28	5598.65	5782.13	5777.69	4572.06	5170.07	5375.85	3680.72	5493.44	6413.66
1-1_GL0104839	2751.38	2617.44	3313.87	3330.39	3442.94	3458.13	3095.44	2660.05	2794.05	NA	NA	NA	NA	NA	NA			Q9CX00	NA	NA	NA	3078.36	2427.83	3068.49	2754.9	2641.21	2959.87	NA	NA	NA	NA	NA	NA
1-1_GL0104841	3301.6	3287.25	2950.22	3756.93	3767.71	3310.99	3303.98	3111.63	2784.3	NA	NA	NA	NA	NA	NA			Q9CXI5	1634.87	1428.62	1416.68	1429.41	1594.86	1107.27	1395.76	1649.2	1312.14	NA	NA	NA	NA	NA	NA
1-1_GL0104842	4984.96	5267.85	4682.16	4900.61	4565.63	4489.94	4231.2	4187.13	4067.54	3781.72	3022.26	4895.98	4121.92	3463.36	3728.16			Q9CXN7	1828.2	4039.91	3352.77	3169.61	3905.77	3866.95	4863.36	5788.71	4122.12	5422.16	4882.36	5274.41	NA	NA	4817.52
1-1_GL0106191	2913.97	2403.74	2552.07	2024.38	1835.72	1862.05	1844.57	1739.87	1234.32	NA	NA	2599.22	NA	NA	NA			Q9CXW4	6177.52	5666.12	5418.58	7848.66	5681.26	6567.94	6536.25	8427.14	7433.49	7269.14	10504.6	6897.07	NA	12094.7	NA
1-1_GL0106191;1-8_GL0071629	12169.4	11740.6	12258.3	10999.4	11056.4	12180.9	12420.4	13348.5	12855.3	10718.4	12671.5	10489.5	10544.4	10765.7	12895.9			Q9CY50	7776.39	8605.66	7558.68	8475.51	8933.71	9468.61	9064.66	9337.77	10411.8	10525.9	12012.2	12696.1	10134.8	12929.8	12321.9
1-1_GL0106191;1-8_GL0071629;MH-6-4_GL0119103	NA	NA	NA	12009.9	NA	11463.5	NA	13594	12463.8	NA	NA	NA	NA	NA	NA			Q9CYA0	907.169	870.288	903.21	798.722	587.612	797.507	558.803	866.895	433.083	NA	NA	530.583	NA	1447.86	NA
11_GL0106913;11_GL0131224;20_GL0163289;6-3_GL0059447;G1-5A_GL0015705;S-Fe12_GL0182026	2787.36	3107.1	2900.77	9756.53	9455.43	NA	NA	5961	4359.8	NA	NA	NA	NA	NA	NA			Q9CYR0	4874.07	5575.9	5045.08	5600.22	5813.35	5331.04	5237.65	5896.56	5210.24	7312.74	5531.67	6232.47	8530.7	4617.75	6151.64
11_GL0106913;11_GL0131224;2-3_GL0012648;6-3_GL0059447;6-4_GL0079360;7-5_GL0059292;G1-5A_GL0015705;Group2-2A_GL0042555;S-Fe12_GL0182026	58294.3	55783.9	53924.8	52796.6	57994.5	55479.9	54346.1	64842.3	67721.5	62766.4	61116.4	69829.2	NA	63189.8	71382.6			Q9CZ13	34191.1	33543	35392.6	29133.2	31246.1	29746.3	30240.9	31959.3	30945.1	29365.1	30132.6	32381.2	27119	28474.8	29252.6
11_GL0106913;S-Fe12_GL0182026	3091.02	2934.95	2501.48	NA	NA	1349.27	NA	2341.49	NA	NA	NA	NA	NA	NA	NA			Q9CZ30	18279.3	21193.5	20773.8	17050.6	17082	22362.2	21538.6	21648.2	24377.8	28170.8	28194	24165.1	26105.9	23764.5	19811.9
11_GL0106920	11064.3	11627.5	11176.5	10647.8	9702.47	9714.24	9934.51	10964.5	10539.2	5633.28	6978.27	6274.09	5481.21	5845.93	4452.55			Q9CZM2	12113.8	11089.8	10829.3	15537.2	17359.7	16610.9	16135.4	15799.6	16104.6	16537.7	15907.7	17343.9	17058.4	NA	15668.2
11_GL0106926	6664.33	7763.98	7418.75	7236.51	7676.25	6149	8392.23	7590.66	NA	4817.84	NA	NA	5416.29	5499.2	6405.84			Q9CZN7	1933.93	2415.73	2152.24	NA	NA	NA	NA	NA	NA	NA	NA	NA	NA	NA	NA
11_GL0106926;14_GL0128315;5-7_GL0064061;MC-6-2_GL0134348;S-Fe20_GL0190872	NA	10134.8	8655.97	8734.08	7006.55	10492.6	6017.09	7230.54	6330.66	NA	NA	NA	NA	NA	NA			Q9CZS1	18228.3	23123.9	20584.7	16917.7	18081.7	17238	13896.2	14840.8	17247.6	14090.7	11032.4	10570.3	NA	NA	14083.7
11_GL0107160	5277.87	3978.24	6097.07	6057.14	6005.09	5147.01	6201.86	6360.9	6792.94	7178.15	8505.92	7350.15	9076.01	6725.77	7520.76			Q9CZU6	46147.8	45283.8	45805.6	63638.8	64485	66585.9	62448.2	62566.4	63572.4	64611.4	61322.1	69366.7	59567.8	58759.9	69690.3
1-1_GL0107181	8432.62	9203.03	8729.57	8011.94	7095.75	7842.3	6720.39	7256.1	7185.42	6962.12	7048.07	7460.61	7899.29	8327.22	7483.31			Q9CZX8	9085.17	8178.82	8723.92	7837.63	7769.58	8368.27	8548.6	8044.09	8511.46	13015.6	14107.7	15940.8	13147.7	8388.01	10949.3
1-1_GL0107181;MC-0-1_GL0000664	8402.55	9006.26	7608.04	12433.9	13288.8	13028	12805.6	13587.6	13569.4	13984.2	13214.8	15580.3	13602.5	18319.7	16555.9			Q9D051	5499.15	5578.71	4735.67	5250.97	5015.55	5206.77	4982.34	4830.55	5614.12	4422.76	5322.04	4195.75	2507.11	5317.95	6409.68
1-1_GL0107182	4914.16	5470.24	5542.1	3701.53	4060.2	4187.31	4382.1	4417.14	4452.75	5513.41	7810.97	5077	NA	NA	NA			Q9D0F9	5066.87	4105.48	3854.88	3352.79	4312.19	3662	NA	4775.39	4684.48	NA	NA	NA	NA	NA	NA
1-1_GL0107182;MC-0-1_GL0000663	4428.66	5156.61	4406.97	6488.23	7486.64	8386.83	7575.09	8284.29	9563.31	7789.34	6998.43	7200.77	6902.22	5202.99	5028.22			Q9D0K2	6367.6	5869.22	6235.31	5862.07	5894.33	5916.69	6130.3	6144.35	5810.71	NA	NA	NA	NA	NA	NA
1-1_GL0107186	3806.95	3992.02	4044.92	4460.01	4937.03	4490.56	3881.27	4289.56	4343.18	5215.77	3953.37	5345.18	NA	NA	3629.97			Q9D0R2	1707.36	1528.41	1473.93	1488.66	1802.51	1791.98	2002.38	1232.88	NA	NA	NA	NA	NA	NA	NA
1-1_GL0107186;MH-0-3_GL0000820	14028.2	12912.9	13464.6	17850.9	15696.9	16230.5	15413	15684.5	16951.5	17077	16515.4	18809	18402.7	16341.7	18286.5			Q9D154	119094	107135	105097	125602	118492	129288	118763	120424	125725	101924	112822	116311	115476	117644	113158
1-1_GL0107186;MH-0-3_GL0000820;S-Fe11_GL0009507;S-Fe1_GL0164230	9222.64	9290	9376.38	9044.96	9804.94	9160.07	9151.38	10148.7	8479.92	7992.58	8575	7958.81	9554.12	10093	NA			Q9D154;Q9JK88	2503.04	2312.04	2047.11	1804.74	1530.55	1585.4	2213.59	1881.97	1716.9	NA	1194.05	NA	NA	NA	NA
11_GL0107512	7417.71	5758.31	6118.53	6357.21	7242.3	6633.01	6397.18	7033.88	6682.97	5545.47	4422.9	4542.81	4078.26	4946.82	4465.77			Q9D172	817.906	NA	NA	1240.21	1572.97	NA	NA	NA	1370.09	NA	NA	NA	NA	NA	NA
1-1_GL0107764	3701.5	3204.72	3439.81	4827.84	4431.95	4968.19	5065.83	4609.9	4220.91	4193.41	4176.63	4161.27	5091.36	5042.81	NA			Q9D1A2	73990.5	65672	67395	67650.5	71852.2	69542	68954.3	65965.5	68095.5	66848.4	65702.5	62740.2	66052	64006.4	55656.2
1-1_GL0108082	27771.5	30079.7	27835.7	26913.1	26610.6	22703.3	25364.7	25427.7	25488	22422.3	23510.9	21170.9	23208.5	19949.6	22089.3			Q9D1D4	5496.22	5699.14	4311.88	5274.15	3007.84	3964.64	5219.66	NA	6861.22	NA	NA	NA	NA	NA	NA
1-1_GL0108221;10_GL0030637;23_GL0137392;4-5_GL0007293;6-1_GL0025377;G1-2A_GL0018708	6992.24	7184.38	7293.86	5041.47	6792.62	5966.53	4770.54	7625.81	4974.15	NA	5778.43	4707.27	4023.33	NA	6146.38			Q9D1G1	1643.91	1572.17	NA	NA	NA	NA	NA	NA	2015.33	NA	NA	NA	NA	NA	NA
1-1_GL0108221;23_GL0137392;4-5_GL0007293	29408.7	30092.6	28733.4	28079.5	26660.7	27989.3	27733.3	26441.3	28896.7	19112.7	20729.5	15560.5	14827	14336	17684.9			Q9D1Q6	1758.22	1865.63	1937.87	2098.59	2301.76	1905.37	2887.86	2486.37	2821.15	4103.03	3157.03	NA	NA	NA	NA
1-1_GL0108544;23_GL0016380;35_GL0050709	2668.84	3019.46	2732.55	3324.52	3074.14	3205.67	3097.51	NA	NA	NA	NA	NA	NA	NA	NA			Q9D1R9	5249.47	NA	NA	NA	6515.17	6277.22	8056.23	NA	NA	NA	NA	NA	NA	NA	NA
1-1_GL0108544;23_GL0016380;35_GL0050709;MH-6-4_GL0170683	6762.65	6400.73	5778.67	6521.4	6126.58	6687.99	3991.97	4831.57	4282.39	3005.91	2903.22	4749.48	4735.18	4296.34	3984.51			Q9D279	2067.32	2440.16	2389.77	2065.78	2042.93	2075.82	NA	2155.94	2445.52	NA	NA	NA	NA	NA	NA
11_GL0108656	43731.7	45378.7	43910.5	41335.3	42071.3	39410.7	42468.6	43721.1	41729.7	41872.8	39638.5	39482.2	43064.1	42274.8	44033.2			Q9D2G2	9114.31	8874.9	9218.42	8132.93	7539.47	8110.03	8487.87	7821.01	6828.38	7856.43	6696.48	8139.78	6833.75	8433.4	6737.72
11_GL0108772	11520.6	10461.7	10727.1	14006.3	12496.8	13468.2	12274.4	13171.3	13476.2	8680.76	7819.09	6894.32	8720.63	7209.89	11987.7			Q9D2Q8	695.052	764.073	624.918	NA	783.638	551.219	NA	NA	NA	NA	NA	NA	NA	NA	NA
1-1_GL0108808;20_GL0151793;Group2-7A_GL0109277;MH-0-4_GL0053297;MH-6-3_GL0045414;S-Fe7_GL0106544;S-Fe8_GL0182684	2851.56	3145.99	3190.73	2757.74	2672.29	2552.7	NA	NA	NA	NA	NA	NA	NA	NA	NA			Q9D2Z1	3661.48	3656.27	3356.69	2687.4	2256.72	1934.75	2525.26	2474.38	2703.99	1602.65	2643.98	NA	NA	NA	NA
1-1_GL0108886	1158.41	1303.87	1498.35	1396.79	1080.3	1369.91	1223.18	1246.25	NA	NA	NA	NA	NA	NA	NA			Q9D309	NA	NA	NA	NA	3171.12	2963.82	3971.13	4232.14	NA	NA	NA	NA	NA	NA	NA
11_GL0108888	23401.7	22949.2	23420.5	21611.6	21967.2	19956.4	20229.5	20989.9	20542.9	21557.1	21258.2	17937.8	18706.4	20356.6	19543.6			Q9D311	10618.2	9344.84	9522.19	NA	NA	NA	NA	NA	NA	NA	NA	NA	NA	NA	NA
11_GL0108888;11_GL0153063	25259.1	20964.9	26973.1	37182.9	35998.7	38020.6	41323.7	43592.3	44121.9	38983.5	36965.3	44214.2	50874	50043.7	38570.6			Q9D312	16096	15916.4	15747.7	18582.7	19014.6	18662.4	20098	19361.3	19238.1	19756.4	20144.3	18840.8	17711.4	17034.6	18622.4
11_GL0108888;11_GL0153063;1A-dyr4-07_GL0109263	34572.9	31331.7	32755.3	30539.7	30358.1	29412.6	31036.2	33142.4	32326.8	33298.1	29032.3	33085.9	31472	26773.2	31052.7			Q9D3D9	12291.7	13165.8	12774.6	15057.1	15329.4	15125.5	13552.3	14147.6	13406	12203.4	14246.9	12888.9	12549.8	11714.2	13336.4
1-1_GL0108993;11_GL0121982;1A-dyr1-07_GL0020514;1A-dyr2-07_GL0034958;1A-dyr2-07_GL0064584;1A-dyr3-06_GL0017534;1A-dyr5-06_GL0013898;1_GL0014036;2-1_GL0015271;2-1_GL0076259;26_GL0143043;34_GL0079617;37_GL0018308;5-2_GL0064268;6-3_GL0118595;7-3_GL0070741;7-5_GL0063140;8-5_GL0030763;G1-3A_GL0067553;S-Fe10_GL0021310;S-Fe2_GL0146399;S-Fe3_GL0211645	99552.6	89570.4	96610.3	61313.4	60392.3	48757.3	37493	37149.1	31130.3	7148.44	5972.43	8582.65	5628.42	4865.31	6148.9			Q9D3H2	162676	148729	133781	155628	158445	155066	144381	147226	162775	166446	167234	149000	179172	191976	157133
1-1_GL0108993;11_GL0121982;1A-dyr2-07_GL0034958;1A-dyr3-06_GL0017534;1A-dyr5-06_GL0013898;1_GL0014036;34_GL0079617;37_GL0018308;6-2_GL0091659;6-3_GL0118595;G1-3A_GL0067553;S-Fe10_GL0021310;S-Fe3_GL0211645	4615.49	8950.75	6663.17	9804.01	9050.86	9926.81	7981.68	7032.8	7904.55	NA	NA	NA	NA	NA	NA			Q9D3P8	NA	2609.49	2584.54	5085.7	5692.7	5050.42	NA	3631.2	NA	NA	NA	NA	NA	NA	NA
1-1_GL0108993;1A-dyr1-07_GL0020514;2-1_GL0015271;2-1_GL0076259;2-3_GL0014793;26_GL0143043;29_GL0054160;34_GL0079617;5-2_GL0064268;7-5_GL0063140;G1-3A_GL0067553	9573.18	9058.97	6876.53	4729.76	5019.13	3407.22	4587.07	5356.62	4038.12	802.987	NA	NA	2253.66	NA	1809.58			Q9D687	21047.6	17607	20421.4	16934	16947.5	16421.6	19335.7	23415.5	16413.7	9122.86	11488.7	15157.9	9811.19	10173.5	8088.33
1-1_GL0108993;1A-dyr1-07_GL0020514;34_GL0079617;7-5_GL0063140;G1-3A_GL0067553	NA	17790.3	1456.86	12001.1	12846.8	12115.6	13336.6	12690.4	12374.6	NA	NA	NA	NA	NA	NA			Q9D6J6	5322.02	5006.17	5398.94	6047.08	6260.22	6249.13	5232.94	6523.4	5712.87	7394.76	NA	NA	NA	NA	NA
1-1_GL0108993;34_GL0079617	8347.52	7811.63	7716.41	7656.08	6750.34	5169.6	6408.64	7036.06	7080.62	2564.53	2814.42	3769.89	3274.69	3125.37	3357.23			Q9D6R2	13812.8	14000	13402.1	12560	12836.9	12395	13060.5	10896.9	12235.5	13744.1	10139.9	11851.3	12181.5	12384.8	10418.1
1-1_GL0108993;34_GL0079617;8-1_GL0126821	53338.9	59055.6	62339.4	NA	NA	NA	NA	NA	75699.7	NA	NA	NA	NA	NA	NA			Q9D6X5	754.217	1021.04	886.034	793.662	NA	868.201	NA	NA	NA	NA	NA	NA	NA	NA	NA
1-1_GL0108993;34_GL0079617;G1-3A_GL0067553	10152.6	8261.32	7054.91	61471.6	70041.8	60115.7	95070.6	93167.4	93487.6	102472	97282.6	96471.6	101079	116520	94180.3			Q9D733	1.03377e+06	1.00787e+06	988011	858015	808898	781390	887811	896857	891202	665963	696977	578340	677189	671428	689199
11_GL0109028	7249.42	8079.73	8135.14	7593.32	7621.66	7798.77	8445.27	6895.64	7187.78	8694.3	9392.88	10059.6	NA	11068.9	13345.2			Q9D7L8	31432.6	34470.2	33307.2	35906	34629.2	34881.3	34144.1	32421.4	33298.6	24968.5	24838.5	26935.7	22268.5	22254.1	16983
1-1_GL0109225;11_GL0119859;2-1_GL0066248	4035.04	4003.09	3942.56	4303.95	4057.83	4731.73	5950.78	6165.76	4939.96	6895.13	6356.78	6084.98	5646.83	4478.33	3944.81			Q9D7P9	11663.5	11138	9924.23	12152	12292.3	10674.9	11853.4	11701.9	12661.1	12524.2	12076.4	11640.5	12830.1	9777.74	13254.3
1-1_GL0109225;Group2-3A_GL0011001	21559.5	10320.8	10034.4	64204.9	61171.4	61143.5	74176	80548.6	79611.2	87317.7	91224	85582.6	96039.4	110694	87986.6			Q9D7S0	259317	NA	205199	NA	NA	NA	NA	NA	NA	NA	437917	NA	NA	NA	NA
1-1_GL0109227;2-4_GL0006265	1457.85	1236.77	1029.74	NA	1146.1	1064.47	1714.96	1488.57	NA	NA	NA	NA	NA	NA	NA			Q9D7Z6	355825	343692	350635	352508	348290	353158	329047	330150	345327	307393	305453	296074	299226	293669	276583
1-1_GL0109227;35_GL0109639;G1-1A_GL0100162	12804.4	11496.3	11199.1	10265.9	7292.55	8692.98	13568.7	14427.1	11313.7	7536.95	8077.51	NA	NA	NA	NA			Q9D816	53841.1	50880.1	52790	56396	57559	55007.8	58384.7	58249.2	60323.5	48600.5	51620.8	47471.3	42763.5	38016.8	42630
1-1_GL0109227;Group2-2A_GL0102032	6100	6786.05	5923.05	7380.15	6696.45	6387.92	5151.02	6492	5925.01	5309.42	5259.22	5673.67	5205.63	NA	NA			Q9D819	4530.36	4972.23	5027.31	6536.39	6651.69	7351.59	7797.24	6996.9	6939.53	7313.27	7052.94	NA	NA	8882.33	5867.72
1-1_GL0109229	12474	6500.89	18007.5	3664.9	3649.59	4476.4	5774.2	5435.82	5404.42	NA	NA	6568.52	NA	NA	NA			Q9D855	10808.5	10452.3	10344.4	8357.21	9228.63	7544.86	9238.16	8896.36	8228.51	7955.67	11793.1	6874.54	8868.8	8422.33	8865.39
11_GL0109255	12029.1	11465.3	12088.9	13279.4	13147.2	13684.1	12137.9	12935.5	12685.5	11973.7	11411.9	10921	9753.91	9802.82	10299.3			Q9D869	2557.46	3332.55	3053.66	2547.72	NA	NA	2954.64	2996.73	NA	NA	NA	NA	NA	NA	NA
11_GL0109256	2242.1	2578.41	2341.19	2831.39	3161.45	2615.22	3075.95	3022.35	3165.72	NA	NA	NA	NA	NA	NA			Q9D8B3	4551.97	4106.29	4834.8	4272.94	4159.98	3659.08	3832.3	3661.94	3636.09	3274.79	4017.75	4294.41	6004.83	NA	5050.23
1-1_GL0110149	5462.16	5641.38	5659.44	5854.44	5834.69	5929.91	5691.15	5626.51	5092.87	4399.62	5972.11	5536.54	8608.23	6740.48	5909.32			Q9D8B4	1811.32	1863.7	2239.65	2124.52	2033.95	2102.84	2800.49	3126.57	2179.66	NA	NA	NA	NA	NA	NA
1-1_GL0110149;MC-0-1_GL0010185;MC-0-3_GL0053589	42247.2	39362.6	39597.6	29491.2	26403.8	27306.4	26732.9	25938.6	26692.1	17571.8	25863.4	22377.8	16639.7	15905.2	18495			Q9D8E6	5942.01	5756.03	5987.88	6704.48	7193.72	8121.99	8702.24	7614.71	5297.06	9292.75	NA	NA	9035.24	NA	NA
1-1_GL0110149;MC-0-1_GL0010185;MC-0-3_GL0053589;MH-6-2_GL0021116	13872.2	12815.4	12180.5	14967.9	14243.1	15568.4	NA	13842.3	NA	NA	NA	NA	NA	NA	NA			Q9D8G5	23006.9	22019.5	21039.6	21885.3	26436.7	24598.6	21151.3	19705.1	20969.5	25117.3	NA	NA	NA	NA	NA
1-1_GL0110379	50012.4	51431.3	49346.6	45443.2	45014.8	44958.1	46789.7	46469.6	43672.5	40703.6	42235.2	42057.8	40069.5	39573.8	41788			Q9D8I3	5326.63	3832.4	4306.95	4515.19	4635.49	4736.22	4339.64	4193.07	4719.13	NA	NA	NA	NA	NA	NA
1-1_GL0110379;1-3_GL0065887;54_GL0144303;MH-6-4_GL0087399	8024.57	10085.6	8443.25	8198.38	8633.16	8257.67	9558.4	8660.25	9157.12	12501.5	12579.2	NA	NA	NA	NA			Q9D8N0	NA	1530.35	1876.53	NA	NA	NA	NA	NA	NA	NA	NA	NA	NA	NA	NA
1-1_GL0110595	2636.69	2804.36	2779.66	3999.73	3003.87	4010.95	3252.01	3870.15	3667.92	NA	6376.45	NA	NA	NA	NA			Q9D8V0	2604.56	2535.78	2241.91	2256.37	2686.7	2441.76	NA	2285.38	2118.76	NA	NA	2961.22	NA	NA	NA
1-1_GL0110595;2-6_GL0080553	3803.99	5237.73	4202.38	3835.08	3567.95	2922.8	5310.13	4560.63	4282.58	NA	NA	NA	NA	NA	NA			Q9D8Y0	2704.09	3344.23	2732.34	3218.18	2982.49	3065.58	3596.71	3304.18	3326.84	3590.57	2193.13	NA	NA	NA	NA
1-1_GL0110655	30194.8	28759.6	28140.3	26238.1	25942.5	26510.2	25707.3	23822.8	25975.3	24069.2	27736.2	19367.4	24058.5	21209.5	18990.2			Q9D9D5	NA	5247.7	4690.82	NA	NA	NA	NA	NA	NA	NA	NA	NA	NA	NA	NA
1-1_GL0110655;17_GL0160550;MH-6-1_GL0097407;MH-6-2_GL0028666	62838.9	62356.1	59982.2	165277	156217	155639	89552.6	92507.1	93713.1	99423	96544.4	88386.3	81302.4	102294	78078.1			Q9DA03	NA	106860	NA	NA	NA	NA	NA	NA	NA	NA	NA	NA	NA	NA	NA
1-1_GL0110655;MH-6-1_GL0097407	11504.1	6228.01	11667.5	NA	13567.1	NA	14576.8	12551.9	14628.9	22146.5	17861.7	20768	17381.4	18329.2	18184.7			Q9DAS9	1632.11	NA	1797.57	1742.35	1628.88	1427.68	NA	NA	NA	NA	NA	NA	NA	NA	NA
1-1_GL0111475	1219.21	1348.05	1306.98	1576.89	1222.18	1260.68	1408.68	1103.99	1201.84	1134.28	1301.27	2434.02	901.782	NA	693.583			Q9DAX2	7241.04	7329.42	6841.28	9708.77	10514.9	10351.1	11491.5	10597.7	11104.2	11650.4	9452.9	9170.35	11846.3	10897.4	10251.5
1-1_GL0111479;37_GL0013375;40_GL0077841	4651.67	4486.67	3912.5	3249.52	2277.06	2266.99	3263.95	2811.43	2843.57	NA	NA	NA	NA	NA	NA			Q9DB05	1688.9	1492.91	1752.99	1933.46	NA	NA	NA	NA	NA	NA	NA	NA	NA	NA	NA
11_GL0111645	9118.07	9088.6	6102.63	15540.3	14885.8	17263	14337.5	13256.2	13507.2	13312.8	12076.4	13118.2	9732	11828.7	11947.3			Q9DB20	9343.18	6944.59	9985.08	7534.52	8060.57	8961.26	8979.19	7877.31	9597.05	8117.14	7302.24	8101.58	9206.19	7949.53	9243.78
11_GL0111645;1A-dyr4-07_GL0006102;1A-dyr4-07_GL0007893;S-Fe20_GL0183304	6857.08	5350.29	5936.45	4324.69	4286.81	4708.58	5809.65	4100.63	4319.39	NA	NA	NA	NA	NA	NA			Q9DB34	2823.13	2450.84	2747.69	3229.52	2875.56	3458.98	3248.15	NA	NA	NA	NA	NA	NA	NA	NA
11_GL0111645;1A-dyr5-06_GL0013397;5-7_GL0130672;6-4_GL0023264;S-Fe20_GL0183304	28283.5	25985	25014.5	25756.1	NA	31599.4	NA	NA	30170.7	NA	NA	NA	NA	NA	NA			Q9DB77	35467.9	37687.5	39800.2	34181.9	33469	33788.4	33723.6	32911.1	31549.5	28248.2	28075.8	27174.4	25625.9	28360.1	29556.4
11_GL0111646	4544.17	4431.39	4936.73	4557.27	4519.61	4206.9	4677.78	4926.03	4688.63	2519.76	NA	NA	NA	NA	NA			Q9DBG6	7300.29	8752.51	8195.83	7729.95	7692.55	7776.32	7239.21	7279.06	6610.46	8007.58	6040.69	7728.16	4662.65	6952.3	7566.51
11_GL0111646;2-1_GL0010886;2-1_GL0051897;2-1_GL0096565;2-3_GL0084512;3B-dyr36-06_GL0058943;6-4_GL0014602;G1-8A_GL0047995;Group2-2A_GL0060000;Group2-3A_GL0194212	6624.4	7012.9	6904.75	NA	4190.41	NA	NA	NA	NA	NA	NA	NA	NA	NA	NA			Q9DBH5	3552.76	4009.06	3789.27	4415.57	3811.29	4622.23	3954.36	4592.82	4525.55	NA	NA	3638.55	4294.31	NA	NA
11_GL0111646;2-1_GL0096565;2-3_GL0084512;G1-8A_GL0047995	7887.23	6360.69	5869.1	6371.42	6493.22	4914.64	7151.87	6090.68	7628.51	1440.5	2955.82	2595.15	4245.93	3106.77	3791.02			Q9DBJ3	2774.72	3146.88	3221.92	2668.03	3095.03	2923.32	2539.17	2795.81	2487.57	3582.89	3244.52	5269.47	NA	NA	NA
1-1_GL0111801;1-1_GL0140275;11_GL0106920;17_GL0063405;17_GL0083926;1_GL0095036;2-1_GL0087638;2-2_GL0072270;2-2_GL0129598;2-4_GL0006265;2-4_GL0077588;2-5_GL0020291;20_GL0054153;2B-dyr19-06_GL0030526;G1-6A_GL0018298;Group2-4A_GL0127595;Group2-6A_GL0076595	6115.28	NA	NA	106972	71088.8	105918	96535.3	102108	106749	105209	91492	89439	90807.7	108770	111715			Q9DBK0	6423.37	5041.18	5988.95	6184.51	4143.79	4014.27	3816.16	3533.96	4060.92	NA	NA	NA	NA	NA	NA
1-1_GL0111801;1-3_GL0083931;2B-dyr19-06_GL0030526	6601.67	5580.74	6602.54	6601.88	7284.9	6532.34	8345.43	7163.17	7385.3	6766.97	6160.94	6760.53	6892.27	6955.66	5282.65			Q9DBM2	1060.01	712.979	883.708	1395.27	NA	NA	NA	1402.36	1075.71	NA	NA	NA	NA	NA	NA
1-1_GL0111801;2B-dyr19-06_GL0030526	5871.5	8933.87	9475.11	9080.74	8581.29	NA	NA	NA	NA	NA	NA	NA	NA	NA	NA			Q9DBP0	7631.66	7650.53	9675.66	10126	11317.6	9587.5	10647.3	10745.7	10641.4	12216.6	10615.4	10196.2	11626.6	9865.66	13426.5
1-1_GL0111812	8096.57	8307.21	8581.49	9991.34	8453.35	12122.3	7730.11	7578.7	8284.09	7563.28	8765.76	8822.57	NA	NA	NA			Q9DBP5	6499.95	7377.72	7388.61	7332.96	7428.61	7739.91	7341.72	8553.14	6722.23	8326.01	7490.79	7071.01	6912.84	6974.97	6889.8
1-1_GL0111812;1-1_GL0124360;10_GL0059712;11_GL0011325;11_GL0026527;14_GL0001317;17_GL0139147;1A-dyr2-07_GL0030054;1A-dyr4-07_GL0048160;1A-dyr4-07_GL0061974;2-1_GL0030314;20_GL0005185;20_GL0012397;20_GL0175919;2_GL0001740;4-2_GL0041327;4-3_GL0001567;4-4_GL0022591;5-1_GL0073769;5-2_GL0102417;5_GL0152003;6-3_GL0065476;6-7_GL0026521;7-1_GL0009368;8-1_GL0125358;G1-2A_GL0010340;G1-2A_GL0083575;G1-5A_GL…	145763	128710	126139	208718	188400	196350	269882	278713	286674	269298	256306	252190	238473	283145	246904			Q9DBS1	4293.49	4341.93	NA	4394.08	4256.84	3982.64	3738.71	4848.22	2967.52	NA	NA	NA	NA	NA	NA
1-1_GL0111812;1-1_GL0124360;10_GL0059712;11_GL0011325;11_GL0026527;14_GL0001317;17_GL0139147;1A-dyr4-07_GL0048160;1A-dyr4-07_GL0061974;2-1_GL0030314;2-1_GL0087653;2-4_GL0003910;20_GL0005185;20_GL0012397;20_GL0175919;26_GL0044151;2_GL0001740;4-3_GL0034632;4-4_GL0022591;5-2_GL0102417;5_GL0152003;6-7_GL0026521;7-1_GL0009368;7-2_GL0086143;8-1_GL0125358;G1-2A_GL0083575;G1-5A_GL0015696;Group2-3A_GL0004…	60220.7	43736.9	43866.4	244328	226918	247611	315948	307584	316451	278155	272770	297790	281613	277988	268916			Q9DBX3	24689.1	28620.3	27629.8	25708.4	27198.1	24349.5	24743.4	24937	25147.6	24035.1	27067.5	24378.6	26991	22701.8	20585.3
1-1_GL0111812;4-2_GL0041327;5-1_GL0073769;7-1_GL0009368;G1-2A_GL0010340	NA	NA	5824.88	4284.63	5334.62	6058.79	NA	NA	NA	NA	NA	NA	NA	NA	NA			Q9DBX6	2102.28	2290.6	2702.12	2118.55	1649.7	NA	NA	NA	NA	NA	NA	NA	NA	NA	NA
1-1_GL0111814	15449.3	13158.3	13916.2	21834.9	19810.2	21106	23861.4	22774.5	23538.2	31438.5	24931	26185.3	26035.2	24120.5	26038.2			Q9DC50	6106.96	5653.76	6141.89	5898.35	5680.08	5250.31	5533.99	5178.08	5104.91	6792.5	5889.56	NA	8077.89	NA	NA
1-1_GL0111814;3-5_GL0058228;6-6_GL0069165;Group2-3A_GL0028219	77722.8	72923.6	77280.9	72357	80738.3	80129.8	80771.8	87090.5	78788.4	69107.5	77027.6	73644.4	65145.5	57811.4	75245.6			Q9DC51	3326.26	3489.31	3425.64	3096.24	3066.67	3170.97	3117.48	3529.88	3304	2952.8	NA	NA	NA	NA	NA
1-1_GL0112147	NA	4160.75	3524.91	NA	NA	NA	NA	NA	NA	NA	NA	NA	NA	NA	NA			Q9DC69	3317.05	3533.97	3725.35	3123.56	3062.76	3380.75	3662.14	3294.88	2948.09	3260.89	2859.5	NA	NA	NA	NA
1-1_GL0112147;1-3_GL0118280	4977.96	4342.56	5042.88	3936.18	4177.49	3346.98	NA	NA	NA	NA	NA	NA	NA	NA	NA			Q9DC70	4934.94	5349.8	5006.06	6161.01	5638.38	5440.38	4977.91	6133.76	4612.56	8750.99	8336.05	7304.36	NA	NA	NA
1-1_GL0112147;1-3_GL0118280;23_GL0123068;26_GL0009909;Group2-8A_GL0108082	NA	4769.96	4685.46	NA	NA	NA	NA	NA	NA	NA	NA	NA	NA	NA	NA			Q9DCC4	5931.81	5965.23	5632.01	6070.03	6396.93	6768.01	6490.64	6440.26	5169.98	7356.55	7177.29	7192.16	6977.16	7978.04	7732.4
1-1_GL0112147;2-2_GL0107972;26_GL0056783;4-1_GL0033815;4-1_GL0039810;4-7_GL0146230;4-8_GL0047587;S-Fe20_GL0019594	NA	NA	NA	14368.4	21493.6	23833.5	NA	NA	NA	NA	NA	NA	NA	NA	NA			Q9DCD0	8012.43	8146.9	8206.48	8320.14	7861.78	8489.34	8541.06	10614.7	8830.82	9076.1	7650.95	8611.27	9904.64	NA	7118.04
1-1_GL0112147;2-2_GL0107972;26_GL0056783;4-1_GL0033815;4-8_GL0047587;S-Fe20_GL0019594	NA	NA	877.259	NA	NA	NA	NA	NA	NA	NA	NA	NA	NA	NA	NA			Q9DCJ5	5068.27	5633.09	5339.02	5208.13	4860.02	NA	NA	6108.68	NA	5808.49	4239.22	4767.45	6752.76	NA	4405.24
1-1_GL0112329;2-1_GL0078929;3-6_GL0069541;MH-6-4_GL0004541;S-Fe1_GL0183669;S-Fe20_GL0119590	1921.47	2161.26	2447.05	1170.65	1347.95	1784.09	1670	1352.02	1006.54	1412.64	552.678	NA	NA	NA	NA			Q9DCM0	22905.6	22770.3	24429.6	22525.7	21971.3	22745.7	20407.5	20124.1	21163.3	16607.1	18045.7	15705.1	17167.6	15638.9	15210.9
1-1_GL0112601;2-1_GL0013830;26_GL0060917;2_GL0078533;4-1_GL0012842;4-2_GL0105915;4-3_GL0028320;5-2_GL0004611;5-8_GL0000019;6-2_GL0015660;6-4_GL0046841;7-8_GL0040923	15098	15166	15000	13185.1	12804.6	12454.3	11058.5	10550.4	11343.4	10670.5	10392.4	10034	10124	13113.9	10996.9			Q9DCM2	4658.69	4787.99	5154.05	4574.51	3954.44	4524.34	4684.23	4334.68	4388.71	3360.53	NA	4954.68	NA	NA	NA
11_GL0112834	6532.47	9437.09	6123.57	4519.93	5876.04	6158.88	5254.52	6102.26	5535.22	5113.75	4236.99	NA	NA	NA	NA			Q9DCN2	3019.21	3541.68	2990.01	3268.39	3328.92	3215.32	3123.91	NA	NA	NA	2337.09	NA	NA	NA	NA
11_GL0112834;1A-dyr4-07_GL0071917;S-Fe9_GL0056616	NA	7053.6	8085.89	NA	NA	NA	NA	NA	NA	NA	NA	NA	NA	NA	NA			Q9DCS9	2857.39	2669.94	2601.07	2820.6	2912.92	2357.43	2329.36	2668.23	2173.01	NA	NA	NA	NA	NA	NA
11_GL0112834;S-Fe9_GL0056616	4204.45	4586.45	3673.19	2925.15	2870.45	2603.39	3240.01	2325.96	2466.12	NA	NA	NA	NA	NA	NA			Q9DCT2	5373.42	5347.67	5039.32	5293.19	5347.42	6065.12	5925.55	5759.69	5760.4	NA	5773.38	5075.56	6913.4	6456.58	NA
1-1_GL0113093	17578.8	18766.4	19809.7	21818.2	22172.6	22175.4	23044.1	20624.8	21397	20222	20746.9	19564.3	21991.6	19642.5	19180.9			Q9DCV7	2490.02	2436.32	2277.44	2733.6	2830.68	2562.72	2511.26	2888.38	NA	NA	NA	NA	NA	NA	NA
1-1_GL0113093;28_GL0066492	25145.9	31236.8	30014.7	23984.7	22113.2	26906.6	26039.8	26021.5	20275.3	25193.7	NA	NA	NA	27807.4	NA			Q9DCW4	8556.28	9475.7	9166.68	15794.4	16566.6	16535.5	16433.2	18524.8	17802.4	16934.2	20634.2	14519.8	16385	14836.3	18120.4
1-1_GL0113093;28_GL0066492;S-Fe10_GL0009972	83125.4	76007.5	80612.5	135315	136249	142010	127891	137054	132131	130416	130638	131456	127412	124613	124941			Q9DCX2	7028.45	7599.13	7496.05	8482.41	9374.59	9717.11	8608.76	7812.34	8317.84	8530.32	9427.04	8353.05	10936.1	8760.95	7913.78
1-1_GL0113093;S-Fe10_GL0009972	NA	NA	8706.61	NA	NA	NA	NA	NA	NA	NA	NA	NA	NA	NA	NA			Q9DD20	8646.25	7439.1	8505.57	7353.71	7301.8	7500.33	7421.21	7161.77	8010.76	5301.25	5315.45	NA	6696.8	7136.06	NA
11_GL0113823	15257.9	12977.3	13715.8	15891.5	16465.9	16131.7	14676.6	14516.8	14639.2	13623.4	16959.2	11586.9	14642.3	13089.6	16512.1			Q9EQ06	3892.66	4979.57	3831.42	4833.01	7901.11	6623.5	NA	5408.21	5501.44	5537.01	5861.58	5359	NA	5179.24	4543.91
11_GL0113823;2A-dyr16-06_GL0019187;4-8_GL0049517	20686.7	20961.2	21922.9	14530.2	15461.7	14371.6	11923.2	12959.5	10529	4000.25	3296.99	2945.67	3627.03	3288.47	3872.42			Q9EQ20	480.18	818.935	649.946	NA	NA	NA	NA	NA	772.01	NA	NA	NA	NA	NA	NA
11_GL0113823;2A-dyr16-06_GL0019187;4-8_GL0049517;7-5_GL0120767	NA	31994	NA	57746.2	59548.3	68865.2	54560.2	48983.6	26712.2	63306.6	63535	61791.5	64521.9	60189.2	61778.8			Q9EQH2	4870.27	4917.59	4688.33	4617.12	4542.34	4567.29	4539.89	3969.93	3673.79	4254.12	4824.9	5138.65	NA	4433.02	7602.86
11_GL0113823;5-2_GL0098440	2654.28	2904.73	2861.83	1919.6	2154.51	2274.73	2113.6	1234.34	2207.29	NA	NA	NA	NA	NA	NA			Q9EQH3	3032.67	2956.97	2543.14	2734.6	3228.03	2919.63	NA	NA	NA	NA	NA	NA	NA	NA	NA
1-1_GL0114159	12501.7	10995.2	11400.1	12408.1	11743.1	12505.5	13135.9	12472.5	12000.4	13806.9	13355.1	14819.1	12688.8	12794.6	13247.7			Q9EQK5	7418.58	7700.91	7834.43	9079.03	8386.78	7766.11	7851.76	8104.53	8473.81	8384.28	7711.3	9594.52	8848.93	6843.9	8010.62
1-1_GL0114166	7494.29	8849.12	8012.26	9532.04	8767.8	9851.68	10985.9	9692.48	10625.1	12784.9	12512.2	12788.8	13276.3	12585.3	12185.7			Q9EQP2	2025.84	2480.86	2437.53	2167.59	3053.13	2234.71	NA	2417.29	NA	NA	NA	NA	NA	NA	NA
1-1_GL0114307;26_GL0100613	16065.5	8112.38	18443.9	14733	16130	15869	15757.7	12881.4	14339.8	NA	10240.4	NA	NA	NA	NA			Q9EQU5	12151.8	10562.4	10876.4	8249.98	7650.05	8101.85	8412.83	10665.2	NA	NA	6627.35	NA	NA	NA	NA
1-1_GL0114307;26_GL0100613;35_GL0089920;8-3_GL0058401	50808	48835	49145.9	48434.8	47846.4	47275.9	52493.9	56507.7	50627.9	45565.6	42618.6	41516.5	41592.4	41002.4	41972.9			Q9ERS2	3246.32	3349.04	4574.52	6727.48	7586.16	7982.98	6537.06	6208.64	6890.53	5162.32	4937.96	4361.96	6485.39	NA	5508.72
1-1_GL0114307;26_GL0100613;8-3_GL0058401	56093.4	52420.1	54156.3	57412.2	54125.6	52112.8	57772.6	54549.8	59989.2	47495.2	48176.5	53658.3	44460	39703.5	41139.7			Q9ES64	3400.38	3410.34	4295.43	3181.44	3328.71	3042.31	3684.72	3319.01	3634.12	NA	3525.35	NA	NA	NA	4647.89
1-1_GL0114553	15263.7	15186	14778.9	18063.7	15984.9	16579.5	15270.5	15075.9	15780	12395.1	13017.6	11912.7	9340.22	11778.7	10892.6			Q9ES88	4088.57	4093.44	4318.75	NA	NA	NA	NA	NA	NA	NA	NA	NA	NA	NA	NA
1-1_GL0114553;2A-dyr16-07_GL0005642	10377.2	10713.8	12785.7	9962.5	9684.01	9149.97	10854.7	10992.4	9758.28	4960.75	5901.94	5784.98	2984.28	6301.59	4955.48			Q9ET22	2227.26	3773.67	2995.99	3177.34	2898.7	2142.06	2297.36	2854.73	2763.32	NA	NA	3942.72	NA	NA	NA
1-1_GL0114553;47_GL0140415;8-5_GL0025241;S-Fe20_GL0093830	28116.4	37732.7	36357.1	40546.8	38729.9	35459.7	35410.5	39597.3	36830.2	33914.3	35290.1	38096.3	24236.5	22096.2	23537.8			Q9ET30	2852.68	3024.49	2960.89	3308.54	3715.01	3638.58	3821.78	3351.61	3163.53	NA	NA	NA	NA	NA	NA
1-1_GL0114862	12029.1	11649.7	12005	11484.6	9574.16	9557.57	10952.3	8693.73	9434.7	7750.92	10237.6	7199.36	12350.8	13092.7	11734.9			Q9JHC0	2357.42	2327.52	1934.2	2528.45	2738.31	2484.73	3312.81	2222.24	2650.28	1569.58	2511.29	NA	NA	5379.07	NA
1-1_GL0114862;S-Fe2_GL0048785	3384.9	3107.91	2990.26	11851.7	11480.8	12154.8	15271.4	13597.8	14463.3	16902.6	14232.7	17180.8	14841.4	15515.8	17685.3			Q9JHE3	203199	224505	214585	251156	247681	255097	243153	253669	250110	191049	213277	189876	184477	174095	189232
1-1_GL0115142;16_GL0053834;2-1_GL0095016;6-2_GL0036740;G1-5A_GL0042635;S-Fe12_GL0080716	26269	19576.1	19434.1	36199.7	37532.9	38344.6	NA	NA	29260.2	NA	NA	NA	NA	NA	NA			Q9JHI5	3019.79	3339.05	3626.5	4269.17	4135.4	3903.69	4989.88	5643.34	4710.43	4297.17	4315.06	4845.9	4554.26	5827.75	7873.08
1-1_GL0115232;34_GL0017243	9029.02	8677.2	9274.12	9169.33	8991.21	8816.37	8516.91	9729.49	10234.5	7616.8	7339.37	7681.56	6543	8744.89	6103.85			Q9JHS4	NA	3046.48	3015.84	NA	2972.32	3233.31	NA	NA	NA	NA	NA	NA	NA	NA	NA
1-1_GL0115232;34_GL0017243;G1-1A_GL0096895	11100.1	12054.3	11944.1	22731.9	24983.4	25004.3	33746.9	30137.2	29911.6	19867.3	23888.2	21472.7	24603.4	NA	25987.1			Q9JHU4	1702.04	1661.03	1750.77	1738.25	2061.52	2108.37	1288.57	1542.48	1765.44	NA	2506.32	NA	4390.2	NA	NA
1-1_GL0115270	33545.7	35028.3	32227.7	35512.5	35262.5	35761.7	34170.8	35339.8	34605.5	35950.8	31735.1	33995.2	31509.7	32666.8	33333			Q9JHU9	8533.91	16005.8	9243.31	10186.8	10428.2	10627.9	12668.8	10538.2	11615.3	12273.7	9382.68	10573.8	12285	13058	12868.5
11_GL0116713;3-5_GL0070412	4005.38	3964.68	4173.91	4454.91	4828.53	4926.55	4320.58	4965.23	4532.53	4685.02	4304.09	3849.6	4958.87	4288.22	3266.26			Q9JI67	3414.05	3891.32	3466.47	3197.88	4167.11	3490.27	4174.27	2834.45	3457.97	4038.16	NA	NA	NA	NA	3500.42
1-1_GL0116892	6549.84	6935.95	6717.78	6707.73	6280.19	6843.86	6790.84	7533.61	7311.89	5572.1	6336.12	5841.21	8121.43	3833.08	NA			Q9JIF7	2104.06	2284.93	2449.86	NA	2438.66	2109.79	NA	NA	NA	NA	NA	NA	NA	NA	NA
1-1_GL0117012	3866.39	3676.48	3959.15	5250.4	4581.43	4926.14	4946.39	3921.56	4852.35	NA	NA	NA	4753.28	NA	NA			Q9JII6	4800.79	5305.96	5209.5	4698.33	4206.07	4820.68	4333.26	4944.18	5397.59	NA	NA	NA	NA	NA	NA
1-1_GL0117261;8-2_GL0048878;G1-3A_GL0125811;S-Fe18_GL0057346	29530.5	31974.2	33133.5	41678.3	41483.3	40506.3	47002.3	46955	46926.8	41204.6	44561.3	44778.5	45593.9	47353.3	44603.2			Q9JIL4	2497.34	3322.14	3036.64	3814.73	3644.74	4335.6	4068.41	3946.8	3874.03	NA	NA	NA	5998.63	3935.12	NA
1-1_GL0117261;G1-3A_GL0125811	7418.59	8098.49	7972.62	7289.16	7809.6	6388.24	6297.01	7563.53	6238.63	6350.85	5651.55	5552.13	NA	NA	NA			Q9JIP7	26514	25291.8	25550.2	24097.1	23700.2	21401.4	24711.5	25972.8	24635.7	19027.1	20458.9	19930.8	20132.5	16125.3	17717.5
11_GL0117532	2952.8	3006.19	2859.7	3229.49	3098.13	2785.92	2688.78	2873.38	NA	NA	NA	NA	NA	NA	NA			Q9JIQ8	3529.04	4034.32	4021.41	3307.22	3603.69	3480.11	4240.69	2988.98	3179.17	2877.95	2288.27	2865.22	NA	NA	NA
11_GL0117532;1A-dyr4-07_GL0109899	11022.9	NA	11317.3	17188.6	17720.6	18697.4	16759.8	16823	NA	17565.8	NA	NA	NA	16437.5	NA			Q9JIW9	3097.9	3559.38	2806.67	NA	NA	NA	NA	NA	NA	NA	NA	NA	NA	NA	NA
11_GL0117532;1A-dyr4-07_GL0109899;5-8_GL0093753	6437.71	6863.14	6888.4	15260.5	14012.5	15046.9	13109.9	12562.3	13042.6	9323.26	11155.8	11910.4	15878	13219.1	14488.9			Q9JJ00	24236	23421.1	22983.5	34547.7	34500.6	34171.8	37240.7	36164	35506.3	35402.9	33813.8	31456.2	34934.1	35881.6	36892.1
1-1_GL0117667	3498.22	3414.29	2990.85	NA	4132.64	NA	3605	4411.58	3711.11	NA	NA	NA	NA	NA	NA			Q9JJX6	2048.55	1695.44	1689.46	1431.25	NA	1523.11	NA	NA	NA	NA	NA	NA	NA	NA	NA
1-1_GL0117667;S-Fe10_GL0031034	23459.5	23001.7	22586.7	24161.3	24227.6	21609.8	20117.1	18689.6	23465.4	23812.9	21271.8	24524.1	20691.7	20051	18199.9			Q9JK81	2328.55	2610.76	2751.66	2634.82	3668	3466.16	NA	2860.42	NA	NA	NA	NA	NA	NA	NA
11_GL0117849	3974.22	4490.19	4780.62	5615.52	5832.93	5855.88	4610.82	5380.2	5228	4443.93	5262.96	5090.29	3948.61	3637.87	6020.52			Q9JK88	19212.7	19569.9	18065.4	23943.4	23122.7	23400.3	24005.4	27680.6	27864.5	25838.7	26714.8	26005.8	26268.4	30478.5	26412.6
1-1_GL0117864	6362.54	6521.15	6925.1	6853.49	6562.15	6088.76	6531.27	6141.16	5858.56	6490.62	6808.1	6184.71	NA	5118.99	6443.31			Q9JKA5	55213.8	51753.6	52996.5	47154.5	48076.4	49710.4	46889.7	44477.6	48765.8	43211	47581.6	48116.7	41293.8	44790.7	41517.6
1-1_GL0117868	23565.2	23725.1	24849.9	30446.5	30510.9	29089.1	28642.3	25046.4	26197.1	29735.3	27149.4	26586.3	32401.1	30433.1	29790.4			Q9JKF1	2892.42	3003.04	2945.05	2798.85	3140.87	3143.79	2580.01	2652.68	2879.13	2703.1	NA	3361.68	3105.57	NA	NA
11_GL0118584	7816.01	7567.95	8035.73	8171.53	7822.08	7250.75	7059.67	7315.07	6236.51	6414.65	6294.98	5780.01	6577.39	6673.54	6487			Q9JKN1	NA	NA	NA	6562.33	6454.85	6162.34	6528.15	6147.34	6193.45	5812.1	NA	NA	7738.14	8422.38	9144.29
11_GL0118584;6-6_GL0018712	NA	NA	NA	12298.8	NA	11677.9	15064.6	14568.2	15623.2	18745.7	NA	18824.5	NA	NA	NA			Q9JKR6	1953.15	2209.41	1793.64	NA	NA	NA	NA	2983.95	NA	NA	NA	NA	NA	NA	NA
1-1_GL0118687;1-3_GL0015145;10_GL0048655;11_GL0028482;11_GL0128752;19_GL0043319;1A-dyr4-07_GL0081851;2-1_GL0042309;2-1_GL0055223;2-1_GL0106619;2-1_GL0110700;2-2_GL0055485;2-2_GL0119514;2-2_GL0131240;2-2_GL0151691;2-3_GL0051869;2-8_GL0056240;20_GL0041194;20_GL0131076;2A-dyr14-06_GL0053546;2_GL0058400;2_GL0109744;3-5_GL0002294;34_GL0009955;35_GL0053842;4-1_GL0043646;4-2_GL0119024;43_GL0068607;5-4_G…	158335	160829	145683	115682	133816	126403	86886.8	66195.1	49941.8	41827.2	41919.2	44190.3	32987.1	59402	40017.9			Q9JL15	2089.87	1858.76	2465.13	1653.34	1204.42	884.489	NA	1085.39	NA	NA	NA	NA	NA	NA	NA
1-1_GL0118687;1A-dyr4-07_GL0019666;1A-dyr4-07_GL0081851;2_GL0109744;5-7_GL0138952;8-4_GL0073668;G1-6A_GL0013373;S-Fe20_GL0027198	98070.5	106055	96255.4	89867.3	93434.9	95327.1	82235	80623.8	84534.5	81209.7	75273.8	77375.7	65471.7	62753.1	79111.4			Q9JLB4	73817.7	70959.1	72182.5	70099.8	70522.5	71107.4	68013.7	69416.4	69243	60984.7	64226.4	60083.7	57207.2	58925.2	59037.2
1-1_GL0118687;1A-dyr4-07_GL0019666;1A-dyr4-07_GL0081851;2-1_GL0042309;2-2_GL0151691;2_GL0109744;5-6_GL0009184;5-7_GL0138952;7-8_GL0086080;8-1_GL0083732;8-1_GL0112958;8-4_GL0073668;G1-5A_GL0086325;G1-6A_GL0013373;S-Fe20_GL0027198;S-Fe9_GL0241485	27823.6	16984	28645.4	163720	174792	164386	290876	272503	274230	289353	330850	336380	329425	353978	267109			Q9JLJ2	5335.94	3901.61	4658.72	5186.08	5923.12	5861.26	5766	4967.81	5573.47	5091.95	5567.83	5620.43	6939.93	5718.09	5882.04
1-1_GL0118687;1A-dyr4-07_GL0019666;1A-dyr4-07_GL0081851;2-2_GL0151691;2A-dyr14-06_GL0053546;2_GL0109744;5-6_GL0009184;5-7_GL0138952;6-5_GL0043846;8-1_GL0116806;8-4_GL0073668;G1-5A_GL0086325;G1-6A_GL0013373;Group2-8A_GL0097846;S-Fe20_GL0027198;S-Fe9_GL0241485	213332	237260	238656	237839	231259	255346	290134	312860	303490	348362	349022	362832	344285	348100	360592			Q9JLQ0	NA	928.789	850.033	NA	NA	NA	NA	NA	NA	NA	NA	NA	NA	NA	NA
1-1_GL0118687;1A-dyr4-07_GL0019666;1A-dyr4-07_GL0081851;2A-dyr14-06_GL0053546;2_GL0109744;5-6_GL0009184;6-5_GL0043846;8-1_GL0112958;8-4_GL0073668;G1-5A_GL0086325;Group2-8A_GL0097846;S-Fe20_GL0027198;S-Fe9_GL0044726;S-Fe9_GL0241485	34917.9	58956.7	33242.8	47273.8	50149.4	43634.9	40916.8	41217.5	52921	44661.7	45495	36528.9	43432	47019.2	43734.1			Q9JLT2	82179.8	77399.3	75407.8	86894.3	93163.5	87181.1	87601.7	86691.6	90549.7	63154.2	67708	58190.3	59665.3	49692.1	51938.4
1-1_GL0118942	7411.28	8450.29	8231.45	8663.51	7972.14	8033.46	7678.83	6697.45	7898.9	NA	6050.36	NA	NA	4670.6	6745.53			Q9JLT4	4171.69	4264.14	4445.9	3915.9	4110.87	4136.46	3727.8	3657.78	NA	NA	NA	NA	NA	NA	NA
1-1_GL0119200;10_GL0024591;16_GL0015629;16_GL0018652;1A-dyr2-07_GL0025186;1B-dyr12-07_GL0014279;20_GL0118339;4-1_GL0047735;G1-1A_GL0002834;MC-0-1_GL0090921;MC-6-1_GL0012762;S-Fe10_GL0031283;S-Fe10_GL0130688	22609.6	23021.6	19636.1	19881.9	23947.8	26627	27787.3	26975.6	30746	27422.8	27683.7	17061.9	19149.4	21249.2	16792.6			Q9JM76	2150.71	NA	NA	3492.97	3832.69	4371.4	3664.02	3961.38	3708.94	NA	NA	NA	NA	NA	NA
1-1_GL0119200;16_GL0018652;1A-dyr2-07_GL0025186;4-1_GL0047735;G1-1A_GL0002834;MC-0-1_GL0090921;MC-6-1_GL0012762;S-Fe10_GL0130688	NA	NA	NA	40678.3	43506.5	43667.7	45395.1	49259	44069.5	NA	NA	NA	NA	NA	NA			Q9JM84	5410.39	4703.25	5401.08	4808.42	5020.02	5187.4	NA	NA	NA	NA	NA	NA	NA	NA	NA
1-1_GL0119848;11_GL0143072;4-8_GL0096578	NA	NA	NA	3638.88	3414.16	2810.13	4322.41	4915.62	3366.48	NA	NA	NA	NA	NA	NA			Q9JM95	1260.19	1348.93	1408.01	1576.85	NA	2126.67	NA	1613.58	NA	NA	NA	NA	NA	NA	NA
11_GL0119859	32691	30825.6	27804.1	41316.9	47665.6	45158.8	50337.8	52892	53880.5	63928.8	63221.3	60898.4	66165.8	63851.4	64772.3			Q9JMA9	8429.14	7715.45	8053.96	11001.2	9959.23	10977.5	9375.33	9953.38	9958.96	8038.1	9548.34	8536.14	7664.15	NA	9676.33
11_GL0119859;11_GL0131219	20633.8	17825.9	17682	31434.1	32569.3	31316.6	35312.9	33593.4	36451.7	36483.6	36763.1	44069.5	33298.9	35784.8	40907.1			Q9JMH6	14930.2	14215	14378.7	16600.4	15883	16021.1	15984.5	16271.7	16269.1	16022.2	16056.3	15166.8	17207.3	13284	15293.7
11_GL0120222	37875.3	38918.5	36307.7	43228.6	44688.4	37167.9	38700.4	41881.1	35985.9	28696.5	31603	25416	27198.3	28345.2	31031.1			Q9NYQ2	8406.94	8282.22	8215.74	7504.51	7528.39	8076.59	7378.05	7689.11	7157.94	7002.42	7293.35	7109.87	NA	6197.86	NA
1-1_GL0120486	3994.29	NA	3707.25	NA	NA	NA	NA	NA	NA	NA	NA	NA	NA	NA	NA			Q9QUI0	NA	3314.95	3959.76	NA	NA	NA	NA	NA	NA	NA	NA	NA	NA	NA	NA
1-1_GL0120486;7-1_GL0071761	3523.97	NA	2374.64	NA	NA	NA	NA	NA	NA	NA	NA	NA	NA	NA	NA			Q9QUM9	14229	11168.6	11404.8	16963.7	17603.8	16799.4	16350.9	17246	17602.2	16526.8	14703.9	15003.3	17545.9	13767.3	17756.9
11_GL0120543	14978	17126	16429.3	22832.3	22198.2	22822.4	24706	22936.3	23704.8	21761.8	19053.6	21172	21772.9	21949.5	17111			Q9QUR6	11000.1	10818.4	10860.1	8705.7	9235.79	8657.3	9800.53	9072.92	10170.8	11387.8	8463.45	9039.71	NA	9126.96	NA
11_GL0120543;1A-dyr4-07_GL0078414	26883.2	26854.9	24821	26609.3	25806	22239.5	27632.1	24030.1	25619.4	NA	24703.4	25526.9	NA	NA	NA			Q9QWG7	10460.4	9123.42	10117.2	9057.81	8751.62	10207	9561.42	9488.53	8982.52	NA	NA	NA	NA	NA	NA
11_GL0120543;1A-dyr4-07_GL0078414;20_GL0054836	25315.8	24326.7	20399.3	19623.4	19673.4	16751.6	19084.4	20587.9	21547.5	22467.9	23703.8	26859.7	32775.9	25833.1	29665.9			Q9QWL7	9469.01	10052.8	10029.5	8210.05	8076.89	7657.86	8531.65	7631.35	6785.7	5233.54	6856.67	7241.96	6496.58	7809.4	8767.57
11_GL0120543;1A-dyr4-07_GL0078414;2-1_GL0102243;2-1_GL0106087;2-2_GL0094996;2-3_GL0103103;20_GL0054836;22_GL0108699;34_GL0007339;7-1_GL0010569;S-Fe12_GL0142942	8363.93	8722.27	8259.99	12298.4	9921.03	11782.8	11684.6	12788.1	9113.45	12145.8	11141.5	13346	12043.1	NA	13947			Q9QWR8	8741.44	8699.14	8764.09	7995.68	8277.55	7964.56	7318.69	6972.44	7362.77	6320.93	6483.88	7293.19	8106.26	7212.89	7410.71
11_GL0120543;1A-dyr4-07_GL0078414;2-2_GL0094996;22_GL0006093;22_GL0108699;34_GL0007339;7-1_GL0010569;7-5_GL0122421	82957	86700	82062	NA	NA	NA	NA	NA	NA	NA	NA	NA	NA	NA	NA			Q9QX15	12815.1	12440.5	12707.1	11260.5	10747	10975	11127.7	11518.7	11256.5	12332	10744.1	9293.39	10206.7	9436.58	7404.48
11_GL0120543;20_GL0054836	17187.9	13671.9	13359.7	16349	15710.4	15350.1	19420.9	20699.7	20422.6	20015.1	21626.3	20143.7	22649.9	26616.7	22107.3			Q9QXS1	4105.56	4219.3	4426.08	4002.95	4161.92	4476.76	5009.05	4527.99	4506.68	4828.86	4644.76	5082.07	3584.07	NA	NA
1-1_GL0120740	5776.93	6102.44	5936.46	6701.51	7057.77	6340.82	7310.68	7353.4	5953.23	7782.8	5823.54	6373.48	8316.48	7923.43	7494.06			Q9QXT0	1809.67	2314.32	NA	NA	NA	NA	2082.28	NA	NA	NA	NA	NA	NA	NA	NA
11_GL0121511;4-7_GL0021685;Group2-7A_GL0140882	7957.6	8039.75	8803.88	8187.99	8682.05	9383.47	9553.98	8671.46	8907.4	7155.68	6466.51	6151.94	5768.85	6843.36	6799.29			Q9QXX4	4665.41	4933.43	4941.06	5789.14	5482.33	5820.75	6520.41	7840.3	6621.59	NA	NA	NA	NA	NA	NA
11_GL0121511;50_GL0053470;Group2-7A_GL0140882	NA	3023.08	2998.49	NA	NA	NA	NA	NA	NA	NA	NA	NA	NA	NA	NA			Q9QYA2	2958.35	3054.5	2729.27	2593.03	2587.52	2555.42	3349.98	2882.5	2718.89	NA	NA	4030.79	NA	NA	NA
11_GL0121511;5-6_GL0095502;Group2-7A_GL0140882	NA	NA	NA	10316.9	10467.5	10677	9578.76	10907.1	10791.3	11403.5	10763.3	9490.75	9592.32	11662	9914.58			Q9QYJ0	1590.92	1501.43	1703.65	NA	NA	NA	NA	NA	NA	NA	NA	NA	NA	NA	NA
11_GL0121511;Group2-7A_GL0140882	21022.7	22746.2	22071.8	22713.4	21843.5	23179.2	22429.1	23633.4	24279.3	23183.5	22603.6	23287.6	21129.8	19771.2	23314.7			Q9QYZ9	12743.6	12953.7	11223.9	8950.37	8174.71	9202.42	8297.97	7926.14	9134.96	7888.42	8601.62	NA	3304.51	NA	NA
11_GL0121666;11_GL0142670;1A-dyr4-07_GL0054274;3-6_GL0057763;3-8_GL0006308;G1-1A_GL0065512;G1-5A_GL0050443	32477.2	32596.7	23597.4	32062.6	31282	30258.6	28290.3	29263.3	25362.2	18833.1	20970.2	18809.8	16878.8	15262.9	16043.6			Q9QZD8	3227.07	4117.43	3683.39	3342.97	3359.69	3086.69	3282.62	3949.59	3208.17	NA	NA	NA	NA	NA	NA
11_GL0121982;1A-dyr2-07_GL0034958;1A-dyr3-06_GL0017534;1_GL0014036;37_GL0018308;7-5_GL0044338;S-Fe10_GL0021310	28497.6	26836.8	25709.9	23496.6	22822.9	25577.2	26176.5	26279.5	25338.7	25976.9	25448	22003.4	20237	20090.1	24623.1			Q9QZE5	2698.36	1987.14	2858.72	3065.21	3087.33	3012.76	4038.32	NA	NA	NA	NA	NA	NA	NA	NA
11_GL0121982;1A-dyr2-07_GL0034958;1A-dyr3-06_GL0017534;1_GL0014036;37_GL0018308;S-Fe10_GL0021310	20709.2	20431.6	23399.5	30621.3	32402.9	29966.1	26851	24827.6	24969.3	20270.8	24541.8	22779.9	23994.1	NA	26075.3			Q9QZN4	9218.25	9551.17	10052.4	8981.35	8993.83	8308.79	8195.24	7308.15	7229.36	6749.04	6411.02	7270.98	6000.14	6577.2	6505.57
1-1_GL0122179	11467	11226.5	9880.78	13894	12602.2	13132.7	14401.3	14164.8	15061.6	12159.6	11559.8	11649.9	12438.7	10218.4	10886.5			Q9QZQ8	2361.51	2572.14	2676.12	5303.74	NA	NA	NA	NA	NA	5198.98	3911.03	4196.63	NA	NA	NA
1-1_GL0122934	6816.26	8370.9	9441.68	11115.5	9540.64	11311.2	17758.1	17177.1	19329.6	21600	17918.1	21213.1	19571.1	14334.8	20572.7			Q9R098	1339.11	1458.28	1569.69	1428.33	1235.35	1604.71	2156.48	NA	1648.38	1692.09	NA	NA	NA	NA	NA
1-1_GL0122934;17_GL0101695	21282.3	21076.8	21337.2	24139.4	24243.7	25022.1	23639.8	23621.2	22771.2	22201.7	21573.8	21480	19893.8	20841.1	21511.9			Q9R0H0	6052.48	6342.01	6526.02	8036.39	8124.46	8196.76	7799.63	7626.52	7827.6	6233.74	7336.07	7850.24	6340.11	4625.71	7671.67
1-1_GL0122934;17_GL0101695;S-Fe9_GL0263219	42705.3	43088.4	42679.9	39788.9	39071.2	39261.7	39140.6	40332.3	39628.1	35902.3	37236.1	33677.5	36961.9	34781.6	36934.5			Q9R0P3	4161.37	3755.93	3938.57	4265.99	4630.28	4665.84	NA	5542.29	4688.21	6378.84	4287.3	5272.66	NA	5154.31	NA
1-1_GL0122934;S-Fe9_GL0263219	19539.7	18479.8	18797.2	16502.5	18533.2	17428.1	15336.2	15242.2	15662.5	13265.5	16764.5	17849.3	11735.1	11088.2	13201.3			Q9R0P5	18292.6	17729.6	18062.8	16797.2	16463.9	17697.6	15582.2	17310.8	15764.3	10018.2	14839.2	9590.15	10671.8	7348.06	10273.1
1-1_GL0123182	7705.53	8137.62	7527.68	8692.78	8629.43	8446.16	9188.11	8440.19	8367.72	9301.6	7332.92	9613.16	9148.39	9046.87	NA			Q9R0Q9	580.798	661.426	778.869	NA	1494.25	1929.84	NA	973.713	756.764	NA	NA	NA	3231.65	NA	NA
1-1_GL0123183	6860.17	6839.32	6548.62	7408.52	7281.77	7231.55	7916.37	7408.44	7860.04	7332.32	7846.93	7598.67	9014.41	7673.58	9311.96			Q9R100	151347	139929	141008	141060	147175	136866	146924	147957	146008	97605.4	91737.5	79618.3	89611.3	79463.9	77634
1-1_GL0123184	17484.3	19632.8	25744.6	19788.6	25549	21298.2	24162.4	24875.2	22528.9	21799.7	22123.6	22811.4	23378.3	21179.5	22645.6			Q9R111	9527.67	10285	9854.34	10335.4	9419.86	10245.9	9638.54	9357.13	8979.51	8366.94	8852.01	7997.2	7918.82	8795.95	8580.03
1-1_GL0123184;16_GL0083579	NA	16237.2	NA	101966	99434.2	116765	90570.6	92754.8	94302.6	94058.9	104427	93230.7	76734.7	72628.5	73368			Q9R112	26238.5	26374.8	25547.6	24585.6	24993.5	25387.8	24602.9	25407.2	24731.1	22619	21538.3	22021.7	22168.8	20393.8	22405.3
1-1_GL0123184;16_GL0083579;3-1_GL0060298;40_GL0063975;G1-1A_GL0096667;MC-0-1_GL0020527;MC-6-3_GL0028761;MH-0-4_GL0006010;S-Fe10_GL0025322;S-Fe10_GL0157138;S-Fe11_GL0106313	233403	162501	223943	191292	207657	210988	229207	218025	224425	202355	175167	179176	167609	153294	166943			Q9R1J0	1217.72	1586.69	2287.79	2658.3	2603.6	3037.1	2931.64	3802.64	3162.11	3932.11	2373.44	2647.46	2165.91	NA	NA
1-1_GL0123184;16_GL0083579;3-1_GL0060298;40_GL0063975;MH-0-4_GL0006010;S-Fe10_GL0025322	158110	165252	163082	163622	160294	168708	146447	146486	157225	194657	197831	157755	180566	191984	195796			Q9R1P0	17886.5	18078.4	17953.5	19369.4	22213.5	21224.6	20402.7	20064.2	20944.4	24105	21046.9	19903.3	24469.9	24524.3	22482.1
1-1_GL0123184;16_GL0083579;3-1_GL0060298;G1-1A_GL0096667;MC-0-1_GL0020527;MC-6-3_GL0028761;S-Fe10_GL0025322;S-Fe10_GL0157138;S-Fe11_GL0106313	42794	42635.3	41231.6	38727.3	40167.9	40188.8	37687.7	42143.5	39630.6	35614.2	32124.2	28680.5	27701.5	21624.6	25281.1			Q9R1P1	6363.95	6378.83	5918.61	6332.27	6211.25	5569.66	5693.77	6131.56	6432.07	3749.64	2976.34	NA	3246.96	NA	NA
1-1_GL0123184;G1-1A_GL0096667;MC-0-1_GL0020527;MC-6-3_GL0028761;S-Fe10_GL0025322;S-Fe10_GL0157138	212232	208366	196764	179882	159001	151544	170906	167656	156504	92593.9	78600.3	NA	NA	NA	NA			Q9R1P3	5198.2	4677.56	4669.71	8583.72	8194.75	8272.38	8621.79	8984.72	8249.68	6359.98	7534.04	7610.15	7770.08	7091.94	6803.53
1-1_GL0123184;MC-6-3_GL0028761;S-Fe10_GL0025322;S-Fe10_GL0157138	7765.67	7386.43	8441.89	7117.04	6620.11	6312.41	6436.09	6372.09	5906.27	7498.82	5068.23	NA	7638.12	6460.09	4975			Q9R1P4	23472.7	23702.2	24472.2	21785.4	23396	21387	23218.3	23054.2	22045.6	22327.7	24897.3	18268.9	23764	NA	23979.2
1-1_GL0123184;S-Fe10_GL0025322;S-Fe10_GL0157138;S-Fe11_GL0106313	34381.3	32923.5	34913.5	38623.2	35124.1	34081	38517.9	36764.7	36883.4	34092.8	34822	38485	29998.8	35923.1	37316.3			Q9R1Q7	2284.07	2041.98	1978.24	3554.12	3159.03	2830.61	3671.49	2954.39	3054.7	4326.83	2708.06	3219.21	3094.94	NA	NA
1-1_GL0123231	16722.9	17095.6	16263.2	17098.3	16026.7	15409.5	14933.1	13907.4	14609.4	15253.4	13765.2	14764.6	12551.6	15222.9	15199			Q9R1Z7	3316.33	3655.95	3559.9	2882.87	3533.04	2770.91	NA	3101.79	2551.67	NA	NA	NA	NA	NA	NA
1-1_GL0123650	741.73	1385.09	1364.78	628.742	932.138	561.75	1136.03	460.83	958.139	NA	NA	NA	NA	NA	NA			Q9WTP6	1891.6	2353.74	2780.41	3657.21	3579.18	3713.58	3158.12	2867.93	2919.47	3425.72	NA	NA	NA	NA	NA
1-1_GL0123650;1-2_GL0067118;2-1_GL0009703;2-1_GL0121721;2-5_GL0005064;4-1_GL0019848;5-1_GL0003080;5-6_GL0053399	6521.59	6123.53	5167.15	28542.9	51134	43967.2	109310	96197.2	108437	131502	128484	134025	129736	130188	128602			Q9WTP7	15157	17664.3	18297	20305	18448.2	23498.7	19231	21784.2	23854.6	35793.8	39702.4	25972.1	NA	31296.1	29212.8
1-1_GL0123650;1-2_GL0067118;2-1_GL0121721;2-5_GL0005064;4-1_GL0019848;8-1_GL0115642;Group2-3A_GL0096859	NA	70461.3	74306.7	NA	NA	NA	NA	NA	NA	NA	NA	NA	NA	NA	NA			Q9WU03	2380.87	2934.19	2881.31	NA	NA	NA	NA	NA	NA	NA	NA	NA	NA	NA	NA
1-1_GL0123650;2-1_GL0009703;2-1_GL0024480;2-1_GL0121721;2-5_GL0005064	39740.9	35345.5	33113.6	41226.1	41973.7	35356.9	64959.4	57623.2	44325.7	95022.5	64395.3	NA	79706.6	87195.2	91356.4			Q9WU78	4741.06	4522.15	4566.03	4729.12	4807.9	4599.08	4748.55	4907.93	4680.43	6409.55	5808.49	5764.7	NA	6363.87	NA
1-1_GL0123650;2-1_GL0009703;2-1_GL0025767;2-1_GL0121721;2-5_GL0005064;4-1_GL0019848;5-1_GL0003080;5-4_GL0121866;5-6_GL0053399;Group2-3A_GL0096859;S-Fe12_GL0089829	87183.3	81564.3	81581.6	87118.8	93337.9	91118.1	92407.7	84186.4	90067	115119	120046	123676	123589	111293	96115			Q9WU81	3597.5	3838.26	3344.79	3985.49	3994.42	4713.6	3095.97	3345.7	3693.95	NA	NA	NA	NA	NA	NA
1-1_GL0123650;2-1_GL0009703;2-1_GL0121721;2-5_GL0005064	781.188	1022.78	1145.47	NA	906.738	642.353	NA	NA	NA	NA	NA	NA	NA	NA	NA			Q9WUA3	2069.02	2020.73	1763.23	1995.44	2590.17	3096.79	2299.73	2403.77	2063.05	NA	NA	NA	NA	NA	NA
1-1_GL0123650;2-1_GL0025767;2-1_GL0121721;2-5_GL0005064;4-1_GL0019848;5-1_GL0003080;5-4_GL0121866;S-Fe12_GL0089829	4762.53	4033.3	4422.73	2788.29	2821.91	2508.18	NA	NA	NA	NA	NA	NA	NA	NA	NA			Q9WUM3	3122.89	3586.52	3595.13	3309.12	3947.23	NA	3497.62	3367.64	3154.82	NA	NA	NA	NA	NA	NA
1-1_GL0123650;2-5_GL0005064	11523.7	11491.7	11094.7	10112.1	9256.77	9908.69	12390.1	11164	10396.9	7938.07	6959.82	9379.71	9109.58	8250.98	7937.84			Q9WUM4	3320.91	3326.28	3248.99	2476.91	2583.19	2344.09	2442.84	2773.93	2440.48	2736.74	NA	NA	NA	NA	2983.68
1-1_GL0123826	7835.97	8614.07	8909.3	10400.3	8395.9	7266.28	12160	10994.3	9958.53	7508.37	7737.56	6536.31	6544.38	NA	9129.91			Q9WUM5	4962.66	5691.4	5872.64	4309.66	4638.46	4210.24	5097.64	4862.56	6127.1	6801.09	4402.98	NA	NA	4070.82	NA
1-1_GL0123826;10_GL0098958;14_GL0028185;17_GL0000326;1A-dyr2-07_GL0069472;1A-dyr4-07_GL0099301;20_GL0129545;6-3_GL0105993;7-7_GL0023089;8_GL0123334;Group2-6A_GL0061250;S-Fe10_GL0047359;S-Fe20_GL0030613;S-Fe9_GL0131303	1411.22	NA	1252.26	1265.46	1025.56	803.87	NA	NA	NA	NA	NA	NA	NA	NA	NA			Q9WUU7	7735.95	9227.28	7728.92	7376.92	8125.95	8498.13	9240.13	10411.8	9421.68	NA	NA	NA	NA	NA	NA
1-1_GL0123826;1-2_GL0110214;10_GL0016532;10_GL0062623;10_GL0098958;14_GL0028185;14_GL0130313;17_GL0000326;1A-dyr2-07_GL0069472;1A-dyr4-07_GL0099301;2-1_GL0111144;2-2_GL0053682;2-3_GL0014792;2-4_GL0098628;20_GL0129545;26_GL0096319;3-5_GL0028454;3-6_GL0049852;34_GL0079616;4-1_GL0022805;6-2_GL0006408;6-3_GL0105993;7-5_GL0063139;7-7_GL0023089;7-7_GL0107700;8_GL0123334;G1-1A_GL0058007;G1-7A_GL0008709;…	5362.08	5067.88	4217.18	2134.38	NA	NA	3226.05	3186.86	2134.5	NA	NA	NA	NA	NA	NA			Q9WUZ9	5073.2	5250.51	5280.18	3817.65	4047.18	4154.81	4463.61	3412.96	4249.91	3827.28	3860.43	NA	NA	NA	NA
1-1_GL0123826;MH-6-5_GL0072282	17255.6	16883.4	16359.4	9635.86	10271	9694.09	9806.79	13249.7	13226.2	13436.1	14539.4	13333	11263.9	8416.39	12546			Q9WV32	3032.29	2785.58	2927.48	3568.43	3621.07	3491.04	3255.99	2771.26	3024.91	NA	NA	2581.43	NA	NA	NA
1-1_GL0123826;S-Fe20_GL0020046	NA	NA	NA	25757.5	27226.6	25966.1	21250.4	22974.6	21922.1	NA	NA	NA	NA	NA	NA			Q9WV54	6531.47	7677.26	7772.71	7176.74	7758.73	7597.39	7444.9	8229.2	7148.09	8176.61	9288	8847.53	10587	NA	11061.9
1-1_GL0123934	4144.3	4360.99	4616.11	4447.49	4974.96	5261.12	4366.15	3807	3751.91	3609.62	3361.5	2818.92	NA	3052.13	NA			Q9WVA4	3250.04	2813.36	2443.1	2995.29	3310.21	3222.83	3050.19	3093.23	2909.02	NA	NA	3804.14	NA	NA	NA
1-1_GL0123935	5507.19	6162.1	6071.7	6537.39	6362.74	6568.95	6096.69	5777.53	5513.79	5605.43	5506.66	5106.39	5670.73	5918.41	4737.76			Q9WVC8	10817.3	10297.6	10921	12741.3	11516.6	11960	11434.2	12106.1	12226.7	12782.6	13081	10840.7	13011	10752.9	13653
1-1_GL0123935;MC-0-1_GL0054819;MC-6-3_GL0095560;S-Fe15_GL0060535	7845.3	9003.39	9614.38	35014.1	32964.1	36609.9	37051.1	37224	33934.9	38622.4	35038.8	35420.7	34948.2	34418.6	33183.5			Q9WVE8	27057.8	17222.5	17484.2	30662.4	29084.2	27442.8	73530.4	57852.6	55229.9	55144	51758.6	NA	56069	61551.7	75276.3
1-1_GL0124400;11_GL0126032;19_GL0080876;1A-dyr4-07_GL0054247;3-1_GL0067242;34_GL0080700;4-3_GL0069547;41_GL0105928;5-1_GL0034953;5-4_GL0087957;6-2_GL0074047;6-5_GL0016265;G1-1A_GL0022223;S-Fe9_GL0236957	NA	NA	NA	26686.8	33757.3	34104.8	32773.1	32357.8	34964.5	39837.2	37179.6	33408.8	41104.9	33029.6	26327.4			Q9WVJ3	5651.76	5777.5	5594.45	8084.95	8052.2	8062.5	7786.64	7942.09	7741.82	7292.88	6651.14	7477.54	6428.58	7134.1	6680.26
1-1_GL0124400;11_GL0126032;19_GL0080876;1A-dyr4-07_GL0054247;3-1_GL0067242;34_GL0080700;4-3_GL0069547;5-1_GL0034953;5-4_GL0087957;6-2_GL0074047;6-5_GL0016265;G1-1A_GL0006230;G1-1A_GL0022223;S-Fe9_GL0236957	29893.5	31114	29827.1	29270.8	32509.1	31754.4	27674.3	29956.6	26613.4	30512.2	25368.1	25538.5	20717.6	19006.1	28900.5			Q9WVK4	2393.47	2125.54	2603.06	2529.81	2917.18	2486.74	3024.56	3442.5	4410.86	NA	NA	3408.9	NA	NA	NA
1-1_GL0124400;11_GL0126032;19_GL0080876;1A-dyr4-07_GL0054247;3-1_GL0067242;34_GL0080700;4-3_GL0069547;5-1_GL0034953;5-4_GL0087957;6-2_GL0074047;G1-1A_GL0006230;G1-1A_GL0022223;S-Fe9_GL0236957	10219.8	10773.8	10250	6753.65	5929.02	5228.76	5200.25	5330.07	6179.88	NA	NA	NA	NA	NA	NA			Q9WVP1	2792.48	3017.68	3023.18	2562.86	NA	NA	NA	NA	NA	NA	NA	NA	NA	NA	NA
1-1_GL0124400;19_GL0080876;3-1_GL0067242;34_GL0080700;4-3_GL0069547;5-1_GL0034953;5-4_GL0087957;6-2_GL0074047;6-5_GL0016265;G1-1A_GL0006230;G1-1A_GL0013733;G1-1A_GL0022223;S-Fe12_GL0097844;S-Fe9_GL0236957	39003	38870.3	40921.7	38974.6	41621.3	38882.7	33541.1	36854.2	27093.9	12868.9	10804	6771.29	8912.89	NA	14446			Q9Z0F4	9605.69	9084.8	9297.39	10512.8	7604.53	9126.12	8327.47	8152.25	7583.57	6086.75	6011.05	7983.04	NA	NA	7789.75
1-1_GL0124400;19_GL0080876;3-1_GL0067242;34_GL0080700;4-3_GL0069547;5-1_GL0034953;5-4_GL0087957;6-2_GL0074047;6-5_GL0016265;G1-1A_GL0022223;S-Fe9_GL0236957	107977	102734	NA	86798.7	94775.6	98891	80369.3	84163.1	93237.8	86208.8	95176.4	81976	98272.8	89338.2	94674.5			Q9Z0G9	18687.4	19485	19273.4	20469.7	17668.9	18191.5	15594.4	16357.1	17383	10781.3	12436.1	12672.3	8334.13	13592.6	14488.8
1-1_GL0124400;3-1_GL0067242;34_GL0080700;4-3_GL0069547;5-1_GL0034953;6-2_GL0074047;G1-1A_GL0013733;G1-1A_GL0022223;S-Fe12_GL0097844;S-Fe9_GL0236957	14788.5	14820.4	15967.1	8786.25	9179.66	4669.78	10595.8	11741.4	11327.8	4730.26	3469.69	2804.44	6016.51	5728.13	9880.22			Q9Z0J0	29729.9	29306.3	30683.8	31151.7	31892.7	30965.8	29110.1	27811.7	29687.3	31537	30788.8	29074.5	30507.2	27920.4	26980
1-1_GL0124400;34_GL0080700	11230.9	10567.8	10030.9	13262.3	12061.8	12534.1	14655.1	15137.1	16605.4	21382.9	18959	14965.4	22150.4	24458.9	21087.9			Q9Z0K8	68721.7	68532.1	72488.4	64024.2	61802.5	62868.1	58994.3	58623.6	58701.8	52418.4	50095.6	47758.8	45532.3	52672.5	48775.6
1-1_GL0124968;1-3_GL0067546;1-7_GL0086771;11_GL0012544;17_GL0099606;2-2_GL0031086;23_GL0073161;32_GL0022008;4-7_GL0040126;6-5_GL0115677;7-4_GL0134972;Group2-8A_GL0158415;MC-0-3_GL0075314;MH-0-4_GL0077722;S-Fe3_GL0108759;S-Fe8_GL0043340	4815.95	5658.28	6332.19	3590.49	3573.83	3922.18	3612.97	3825.36	4367.59	2421.44	NA	NA	756.803	NA	1421.83			Q9Z0L8	53992.3	51367.2	55350.5	60599.2	59276.3	59501.8	60770.1	61695	59073.9	70550.5	65853	63867.8	60274.6	61634.3	66732.8
1-1_GL0125465;4-8_GL0090143;Group2-2A_GL0141779	NA	NA	NA	3787.02	4434.07	NA	11166.4	NA	8109.46	9451.83	8593.91	9638.73	NA	NA	NA			Q9Z0N1	NA	1150.47	NA	1511.03	1653.28	1569.7	1354.91	1589.15	1336.55	NA	NA	NA	NA	NA	NA
1-1_GL0125465;4-8_GL0090143;Group2-2A_GL0141779;Group2-4A_GL0024003	16638.4	16748.2	17789.8	16672.4	18188	16986.7	18817.4	17726.7	15809.7	12264.1	11402.5	9386.89	NA	NA	NA			Q9Z0S1	2143.8	2609.3	1870.66	NA	3321.26	2750.39	3716.37	2852.92	3549.31	NA	NA	5205.16	NA	NA	NA
11_GL0125565	57587.1	56627.5	54644.8	66439.7	54958.4	52148.7	68781.8	69263.6	71129	55507.6	51258.6	63747	59979.4	65744.7	56918.8			Q9Z0T9	9418.6	9047.43	8855.32	7428.16	8221.09	6758.53	NA	NA	NA	NA	NA	NA	NA	NA	NA
11_GL0125565;6-2_GL0034935	12099.3	11771.4	11119	NA	NA	NA	NA	NA	NA	NA	NA	NA	NA	NA	NA			Q9Z0X1	3756.5	3227.62	3315.21	3319.16	3512.91	3630.21	3518.25	2735.98	3204.56	4418.47	3771.72	NA	3788.17	NA	NA
11_GL0125782	14556.8	15912.3	14621.2	16059.7	15968.8	15114.5	16356	17187.2	15669.6	13794.9	17366.5	16088.8	12485.1	13681.6	12432.8			Q9Z0Y2	341170	315863	312056	445141	474014	460924	661064	614353	694651	744701	796131	774731	904985	765288	700183
11_GL0126032;19_GL0080876;1A-dyr4-07_GL0054247;5-1_GL0034953;5-4_GL0087957;G1-1A_GL0022223	8709.89	8431.84	6362.53	12160.5	12261.1	12994.1	26599.4	26494.9	26508.8	25279.7	26009	27309.4	24494.6	28441.3	25530.3			Q9Z0Z4	1203.49	1417.79	1182.78	1426.3	1258.43	1280.68	1176.9	1176.69	980.952	NA	NA	NA	NA	NA	NA
11_GL0126032;1A-dyr4-07_GL0054247	11912.5	13078	12785	10019.5	8984	8694.06	8338.42	9268.09	10174.2	NA	5401.17	NA	8589.6	NA	6628.86			Q9Z1Q5	23640.9	22755.8	25297.9	18929.7	19976.9	20899.3	18711.7	21013.7	18705	19789.8	20373	18057	28020.9	23973.8	20279
11_GL0126032;1A-dyr4-07_GL0054247;3-1_GL0067242;5-1_GL0034953;6-2_GL0074047;6-5_GL0016265;G1-1A_GL0022223	5158.66	5047.42	5166.3	12192.5	13144.6	12451.2	12361.3	13624.5	11888.7	11448.6	10620.1	10099.7	11424.4	8463.87	10846.2			Q9Z1Q9	609.95	416.519	NA	498.319	NA	NA	NA	NA	NA	NA	NA	NA	NA	NA	NA
11_GL0126032;1A-dyr4-07_GL0054247;3-1_GL0067242;G1-1A_GL0006230;G1-1A_GL0013733;S-Fe12_GL0097844	10601.1	12005.7	12393.3	8327.5	NA	NA	NA	NA	8377.34	NA	NA	NA	NA	NA	NA			Q9Z1T2	2156.88	2204.97	2482.42	3549.19	2495.19	3393.41	3322.55	3284.68	NA	NA	NA	NA	NA	NA	NA
11_GL0126032;1A-dyr4-07_GL0054247;G1-1A_GL0006230	2442.74	2296.76	2278.09	1744.61	NA	NA	NA	NA	2263.99	NA	NA	NA	NA	NA	NA			Q9Z1W8	9105.97	8970.02	8434.46	9274.05	8873.97	8698.68	8969.78	8662.45	9231.68	8453.15	8470.73	7702.89	7861.57	7967.81	10248.8
1-1_GL0126511	5162.13	5245.27	4957.8	6864.87	6528.24	5578.57	5088.44	5730.96	6006.33	NA	NA	NA	NA	NA	NA			Q9Z1Z2	4201.57	4204.57	4639.82	4430.24	4026.3	4114.36	3583.03	3633.91	3979.1	1925.92	2098.4	3722.12	NA	3419.8	NA
1-1_GL0126511;13_GL0007091;8-5_GL0061892;G1-3A_GL0097751;S-Fe20_GL0042994;S-Fe20_GL0074935;S-Fe8_GL0091779;S-Fe8_GL0175826	7948.58	7263.64	7177.54	6119.11	6335.49	6797.18	6203.15	5242.95	5460.9	NA	NA	12516.5	NA	NA	NA			Q9Z261	23450.4	44521.8	35853	45489.4	50551.1	46583.1	36143.3	40817.1	42994.1	13519.7	24244.9	17391.6	17076.4	16948.3	20375.6
1-1_GL0126511;47_GL0058974;S-Fe2_GL0030158	3202.84	3374.99	2768.51	3529.11	3718.14	4418.99	NA	NA	5996.61	NA	NA	NA	NA	NA	NA			Q9Z2D3	NA	NA	NA	NA	NA	NA	NA	NA	3203.87	NA	NA	NA	NA	NA	NA
1-1_GL0126511;8-5_GL0061892;G1-3A_GL0097751;S-Fe1_GL0171338	16269	14967.8	18053.6	30558.4	27974	28924.5	30614	31165.4	31755.8	30254.6	34177.7	NA	NA	30227.1	28616.3			Q9Z2H7	12977.9	12083.2	12488.8	11603.9	10914.6	11800.9	9939.59	9697.31	9303.13	7362.01	8075.96	7743.78	6699.19	7760.41	8431.69
11_GL0126983	5795.1	5954.75	4676.68	5756.34	5548.92	5017.21	5352.59	6097.09	5554.69	6337.58	5632.12	7454.18	6954.9	6393.67	5175.06			Q9Z2I0	2125.81	2000.53	2104.14	2214.68	2085.84	2378.58	2096.06	2193.53	1826.15	3106.29	NA	NA	NA	NA	NA
1-1_GL0127751	13319.3	14015.2	13073	10237.7	11030.7	11239	10200.1	9973.32	9640.81	9001.25	8710.71	9902.49	10221.4	6917.91	8354.51			Q9Z2I8	6066.39	6257.4	5657.38	5850.32	5573.26	6027.52	5634.51	5561.94	5890.5	5003.22	4442.76	5258.62	4230.69	2958.88	3962.63
1-1_GL0127858	14284.4	14900.9	16931.4	15730.3	15739	15973.3	13901.3	15917	14350.9	15762.9	13881.5	14156.4	16777	15743.5	14674.5			Q9Z2I9	3130.76	3013.13	3057.74	3322.84	4260.27	3621.45	NA	2998.58	3461.35	NA	NA	4214.65	NA	NA	NA
1-1_GL0127859	10591.7	10838.6	11221.8	9898.52	10265.4	10055.6	10030.7	9956.83	10337.1	10189	10569.8	10007.4	7519.49	10963.7	10607.8			Q9Z2K1	12896.6	13337.5	13350.1	12300.8	11497	10292.7	11118.8	12969.4	11410	9857.79	NA	NA	7110.81	NA	NA
1-1_GL0128445	46004.9	45493.9	44878.9	47246.2	45769.6	47990.9	44466.3	44217.4	42793.5	45211.8	47126.9	45696.9	40160.2	47986.9	43888.5			Q9Z2M7	3029.67	2802.89	3349.32	4049.73	3308.27	NA	2708.89	NA	3362.19	NA	NA	NA	NA	NA	NA
1-1_GL0128445;17_GL0105836	4330.9	3631.42	3341.59	NA	NA	NA	20285.5	19823.5	NA	NA	NA	NA	NA	NA	NA			Q9Z2T6	6597.21	6616.3	7592	8210.95	9830.46	9313.21	7104.59	7540.63	7238.08	8572.93	8060.86	10019.6	9887.15	NA	NA
1-1_GL0128445;S-Fe7_GL0084033	9043.95	8567.79	8204.77	5973.6	6401.45	4852.34	6302.87	6481.13	5793.59	2564.21	2316.6	1791.6	4833.79	4988.56	3881.84			Q9Z2U0	24689.6	24605.8	24323.8	27025.1	26300.3	23930.2	23403.8	26393.1	25604.4	16274.8	17795.5	18107.3	17172.2	21146.3	19285.1
11_GL0128492;35_GL0093169	2147.19	2055.49	1984.42	2546.09	1962.84	NA	NA	NA	NA	NA	NA	NA	NA	NA	NA			Q9Z2U1	10628.3	9772.43	11178.5	11331.3	10180	10880.4	15319.6	13428.9	12897.9	15590.8	14642.1	15911.2	19931.9	18577.6	16482.2
11_GL0128492;35_GL0093169;6-7_GL0004997	5306.31	4676.02	4851.33	6449.66	6352.43	7232.77	6113.06	5846.74	6424.51	7393.45	6680.05	NA	4959.79	NA	7302.17			Q9Z2V4	14561.5	14500	15900.1	15627.9	16085.4	17270.3	18450.4	17219.9	15872.7	15856.4	20974.7	21557.7	14689.4	16018.2	20489.9
11_GL0128580	7164.04	7940.49	8416.81	7998.55	7726.46	8726.61	7873.82	7791.88	8313.36	8917.33	6784.51	8623.98	8167.7	9468.61	8660.75			Q9Z2W0	100896	103558	95572.5	99300.8	103078	100508	93252.1	97037.2	98756	90764.3	88434.4	87838.9	81113.5	79694.4	85351.5
11_GL0128752	114567	124490	115811	117103	110761	108948	116444	104225	111279	83778.7	81385.4	102545	93005.3	75567.9	95301.7			Q9Z2Z6	5959.9	6805.96	5504.96	11831.1	11540.9	11551.2	13233.1	12461	14792.9	17173.3	15486.9	17070.9	12711.5	15662.9	16472.1
11_GL0128752;2-1_GL0055223;2-2_GL0055485;2-2_GL0119514;2_GL0058400;3-5_GL0002294;35_GL0053842;7-5_GL0132684;8-2_GL0109138	864927	853137	850453	934901	964052	1015540	1083210	1085390	1128690	1453640	1411200	1314160	1492200	1611030	1371320			Q9Z331	2274.76	2157.65	2175.2	NA	1617.85	NA	NA	2228.03	NA	NA	NA	NA	NA	NA	NA
11_GL0128752;2-1_GL0055223;2-2_GL0055485;3-5_GL0002294;7-5_GL0132684;8-2_GL0109138	18568.8	24765.3	26929.5	27667.5	28158.8	26430.4	26127.7	25798.6	28035.4	29212.8	31517.8	22269	26169.8	32936.4	20808.9			A2A863	6483.64	5587.12	6158.05	7870.89	7078.32	7877.53	7062.54	7928.12	6867.52	8316.82	6250.79	8001.95	7957.27	4240.88	8029.96
11_GL0128752;2-1_GL0106619;2-1_GL0110700;20_GL0131076;4-1_GL0043646;5-4_GL0071929;6-1_GL0042817	93673.8	74557.1	71702.9	63391.8	61308	44114.4	59699.3	66717.2	64002.6	29957.5	24219.9	17056.3	31314	18022.3	21797.6			A2AEP0	194984	171046	203463	222240	189241	207028	202674	211903	201579	186643	172713	162609	186188	151170	174942
11_GL0128752;3-5_GL0002294;7-5_GL0132684	29232.7	40056.2	35927.3	205030	222876	240171	212252	209497	221688	221454	206209	185699	182749	148923	198529			A2AJX4	5953.83	6106.11	5875.39	5462.82	5385.77	5265.85	4427.04	5294.99	4893.41	5719.49	5551.39	6459.39	3177.6	5873.81	4597.22
11_GL0128753	22140.4	22240.7	18492.7	41516.6	40011.9	40220	43370.4	46472	43964.5	50888.6	45327.2	46595.5	45994	46260.3	45355.9			A2AKK5	1495.49	1697.17	1521.55	1886.61	1569.64	1806.18	1821.08	1906.83	1323.18	NA	NA	NA	NA	NA	2302.88
11_GL0129182	3361.87	3623.03	3392.11	3263.77	3050.07	2699.9	2441.18	2328.05	2169.89	NA	NA	NA	NA	NA	NA			A2ASS6	5004.85	5429.66	5247.9	5272.68	5569.64	5497.81	5653.81	5822.65	5367.52	4512.62	5013.72	4347.89	NA	NA	5543.51
1-1_GL0129407	16828.9	18534	18123.8	18880.6	18833.8	18603.7	17990.3	16196.4	15557.8	14358	14996.1	15121	16248.4	16643.6	13141			A3KMP2	2480.33	2772.31	2421.36	NA	NA	2919.73	2698.02	2225.68	3071.69	5345.36	NA	NA	NA	NA	7596.33
1-1_GL0129407;1_GL0054117	13805.3	13508.5	12718.3	4006.88	4082.16	2633.75	4976.45	6200.36	5588.84	NA	7800.75	NA	7186.8	NA	NA			B1AQ75	3629.62	NA	NA	4358.63	NA	3769.48	3576.93	4681.49	4141.43	NA	NA	NA	NA	NA	NA
1-1_GL0129836	4535.53	4607.88	4456.85	4481.83	3909.28	4511.6	4047.8	4184.83	3703.19	6319.02	NA	NA	NA	NA	NA			B1AQ75;Q9D312	7514.91	5749.35	6611.33	10391.1	10450.9	11192.2	NA	14073	NA	NA	NA	NA	NA	NA	NA
1-1_GL0129836;2-1_GL0078171;7-1_GL0053968	6924.06	28416.8	28325.9	35301.5	35410.4	35182.9	NA	35309.5	36783.7	NA	NA	NA	NA	NA	NA			B1AR13	NA	NA	NA	3149.6	3043.38	3835.2	3668.63	2865.64	NA	NA	NA	NA	NA	NA	NA
1-1_GL0130386	6763.59	6375.46	6678.05	5065.25	5288.63	4453.33	5663.37	6490.7	5278.31	5180.91	4827.41	5211.52	5327.24	4677.25	5079.6			B1AVD1	147009	163178	167552	173417	181675	175574	187729	182414	184473	171524	171819	153272	160704	174829	172726
1-1_GL0130507;1-1_GL0143732;MH-6-3_GL0055617;MH-6-3_GL0137044;S-Fe20_GL0044627	3435.6	3305.87	3035.57	2940.87	3120.89	2773.41	3269.67	3166.83	3223.95	NA	4204.97	NA	NA	NA	NA			B2RQC6	1735.1	1551.42	1526.15	NA	NA	NA	NA	NA	NA	NA	NA	NA	NA	NA	NA
11_GL0131219	10458.3	11087.7	10721.1	9745.89	9739.97	9599.45	9482.46	10538.4	10604.5	8149.93	7475.66	6789.65	5630.07	5898.63	9291			B2RX12	1054.38	NA	1164.89	NA	NA	NA	NA	NA	NA	NA	NA	NA	NA	NA	NA
11_GL0131219;Group2-3A_GL0011001;S-Fe3_GL0011406;S-Fe9_GL0153918	87871.6	81128.8	79273.9	91338.1	86614.1	80857	77298.5	74640.1	88133.5	98648.5	NA	85949.8	NA	89101.3	89316.3			B2RXS4	9377.86	8748.12	8236.86	9496.79	9870.28	8859.98	9057.3	8639.61	8706.51	7763.51	7749.87	7670.12	7845.06	9554.84	7852.48
11_GL0131220;20_GL0122417;4-3_GL0014682;6-2_GL0045494;Group2-7A_GL0012768	58152.4	58683.6	47603.2	82953.3	81828.2	81819.1	97754.8	NA	102895	144025	145894	147658	139438	147634	131518			B5X0G2;P11588;P11589	664162	805422	651503	693748	748842	636913	648288	648225	644834	573929	542420	403749	399831	476795	486964
11_GL0131220;20_GL0122417;6-2_GL0045494;Group2-7A_GL0012768	1095.54	1027.74	943.193	619.891	494.413	NA	NA	736.529	NA	NA	NA	NA	1290.89	NA	NA			B5X0G2;P11588;P11589;Q5FW60	96936.6	87778.5	71872.5	112795	135520	127515	172618	181911	196424	209624	188866	193055	176553	200663	167860
11_GL0131224;20_GL0163289	2622.93	3141.76	3229.16	2247.39	2429.14	2655.86	2109.12	2029.84	1430.13	978.388	2398.03	1199.32	1564.17	1419.51	701.54			C0HKE1;C0HKE2;C0HKE3;C0HKE4;C0HKE5;C0HKE6;C0HKE7;C0HKE8;C0HKE9;P0C0S6;Q3THW5;Q64523;Q6GSS7;Q8BFU2;Q8CGP5;Q8CGP6;Q8CGP7;Q8R1M2	262190	246682	238332	324258	336514	322427	326153	310401	326966	336645	339863	319482	336396	339158	289753
11_GL0131224;20_GL0163289;6-3_GL0059447;G1-5A_GL0015705	5232.28	4165.74	3687.33	1882.24	1920.9	NA	NA	3008.91	1552.11	NA	NA	NA	NA	NA	NA			C0HKE1;C0HKE2;C0HKE3;C0HKE4;C0HKE5;C0HKE6;C0HKE7;C0HKE8;C0HKE9;Q64523;Q6GSS7;Q8BFU2;Q8CGP5;Q8CGP6;Q8CGP7;Q8R1M2	9889.51	6571.56	5143.65	4698.08	3408.66	3700.74	5210.62	5268.07	5325.43	2764.19	2304.96	2731.19	6016.51	5135.15	7781.14
1-1_GL0131296	16015.7	16742.7	17406.3	14077.5	15157.5	14471.4	13412.1	15109.3	15500	11749.8	11914.9	10643.9	10739.9	8738.66	11245.4			C0HKE1;C0HKE2;C0HKE3;C0HKE4;C0HKE5;C0HKE6;C0HKE7;C0HKE8;C0HKE9;Q8BFU2;Q8CGP5;Q8CGP6;Q8CGP7;Q8R1M2	6976.04	5665.53	5110.43	NA	NA	NA	NA	NA	NA	NA	NA	NA	NA	NA	NA
1-1_GL0131432;1-1_GL0142511;1-2_GL0016953;1-2_GL0095952;1-2_GL0106009;1-2_GL0129659;1-8_GL0002819;11_GL0069170;1A-dyr2-07_GL0018394;1A-dyr4-07_GL0022802;1A-dyr4-07_GL0104552;2-1_GL0032986;2-3_GL0029391;2-4_GL0056650;26_GL0084018;28_GL0064281;3-5_GL0026479;3-5_GL0118066;3-5_GL0125912;5-1_GL0086683;5-2_GL0074880;5-6_GL0014236;6-2_GL0007112;6-3_GL0074355;6-4_GL0056180;6-5_GL0038305;6-5_GL0134428;6-8…	12142.6	14652.7	14933.2	NA	NA	NA	NA	NA	NA	NA	NA	NA	NA	NA	NA			E9Q0N2	2019.59	2175.87	2350.28	1576.76	1639.23	1490.57	1892.86	1729.65	1463.15	NA	NA	NA	NA	NA	NA
1-1_GL0131432;1A-dyr4-07_GL0104552;28_GL0064281;3-5_GL0118066;3-5_GL0125912;6-4_GL0056180;8-2_GL0052282;Group2-2A_GL0086136;MC-0-1_GL0027645;MC-0-3_GL0104301;MC-6-1_GL0080604;MC-6-3_GL0066855;S-Fe10_GL0005531;S-Fe10_GL0012571;S-Fe11_GL0007172;S-Fe2_GL0028018	9726.58	9088.77	9053.43	NA	NA	NA	NA	NA	NA	NA	NA	NA	NA	NA	NA			E9Q414	2177.36	2132.27	2110.73	1706.26	2008.74	2000.65	1548.94	1861.47	1480.58	1969.99	1785	NA	NA	NA	NA
1-1_GL0131432;28_GL0064281;MC-0-1_GL0027645;MC-0-3_GL0104301;MC-6-1_GL0080604;MC-6-3_GL0066855;S-Fe10_GL0005531;S-Fe10_GL0012571;S-Fe11_GL0007172	29903	26958.2	27085.6	22172.1	24820.8	22886.9	21939	22278.4	23450.7	17694.5	17414.8	22413.9	15942.1	12947.4	16247.1			E9Q557	2656.8	2822.61	2400.16	2885.49	1771.9	2160.26	2504.9	3304.95	NA	NA	NA	NA	NA	NA	NA
1-1_GL0131432;28_GL0064281;MC-0-1_GL0027645;MC-0-3_GL0104301;MC-6-1_GL0080604;MC-6-3_GL0066855;S-Fe10_GL0005531;S-Fe11_GL0007172	54766.3	59499.4	58413.5	66129.8	66157.4	68324.6	63743.7	78161.8	60249.1	NA	69286	67015.4	78407.2	NA	NA			E9Q634	1156.97	927.732	904.336	NA	1197.95	NA	NA	NA	NA	NA	NA	NA	NA	NA	NA
1-1_GL0131432;28_GL0064281;MC-0-1_GL0027645;MC-0-3_GL0104301;MC-6-3_GL0066855;S-Fe10_GL0005531;S-Fe11_GL0007172	14964.1	15698.9	16535.8	24860.8	25899.5	24152.5	21841.7	21169.8	22343.7	23393.6	21966.8	23766.5	20182	20560.2	24822.4			E9Q7P9	292852	313817	292669	325347	344987	318018	335006	345369	354273	291049	289917	298931	294218	277162	289065
1-1_GL0131432;28_GL0064281;MC-0-1_GL0027645;MC-0-3_GL0104301;MC-6-3_GL0066855;S-Fe11_GL0007172	1998.5	2768.22	2165.51	1546.42	1846.64	2034.58	NA	NA	2115.34	NA	NA	NA	NA	NA	NA
1-1_GL0131432;28_GL0064281;MC-0-3_GL0104301;MC-6-3_GL0066855;S-Fe10_GL0005531	10968.9	10238.3	10412.6	8849.46	9521.26	8805.77	10645.5	9650.13	8585.38	8492.65	7201.1	7788.59	6135.24	5827.34	8252.1
1-1_GL0131432;MC-0-1_GL0027645;MC-0-3_GL0104301;MC-6-1_GL0080604;MC-6-3_GL0066855;S-Fe11_GL0007172	1932.02	6096.67	3240.02	13385.8	13818.5	14148.9	12221.2	15259.2	15185.5	14673.3	16059.1	18397.3	13863	9863.8	18804
1-1_GL0131432;MC-0-1_GL0027645;MC-6-1_GL0080604;MC-6-3_GL0066855;S-Fe10_GL0005531;S-Fe11_GL0007172	17379.6	13713.7	14126.4	17985.3	16531	17803.7	13148.3	14700.1	15578	7673.83	14757.9	10816.1	6241.45	10063.2	6692.97
1-1_GL0131432;S-Fe10_GL0005531	1710.49	NA	NA	1797.6	2858.18	3032.1	3417.91	2469.48	2406.87	2587.29	3780.85	NA	NA	NA	NA
1-1_GL0131480	8647.16	8361.8	8309.53	9170.08	8616.56	9527.92	8789.31	8690.83	7554.79	10118.4	9098.35	8337.75	8339.92	8324.88	9493.21
1-1_GL0131531	10907.3	11976.5	10724.6	10034.4	11771	12604.8	10906.3	11552.9	11231.7	NA	8326.7	NA	NA	NA	NA
1-1_GL0131531;28_GL0113309	3187.7	2707.1	2951.63	2360.73	2906.3	3501.64	2216.45	2442.66	2634.35	NA	NA	NA	NA	NA	NA
11_GL0132807	5270.11	5409.76	5379.23	6123.12	6819.75	7025.37	7731.47	6734.41	6404.37	11234	9139.06	11529.5	8394.91	11394.4	8020.8
11_GL0132807;8-2_GL0053421;G1-5A_GL0008401;S-Fe20_GL0135464	5651.86	5312.53	5171.7	5265.02	NA	NA	NA	NA	7761.34	NA	NA	NA	NA	NA	NA
11_GL0132807;S-Fe20_GL0135464	7329.58	8222.68	8038.11	7511.62	6295.13	6881.31	7558.59	6611.76	6253.5	6041.26	4362.62	NA	NA	NA	NA
1-1_GL0133105	3151.51	3200.86	3597.14	3576.83	3264.2	2954.31	2484.74	2831.43	3233.99	2252.41	2209.89	4210.53	NA	NA	NA
1-1_GL0134047	6935.87	7063.69	6977.73	6695.31	6462.06	7354.93	6464.6	5898.95	6667.7	5855.56	5123.82	4955.92	4913.1	5080.19	5832.75
1-1_GL0134047;10_GL0093032	26346.1	28038.4	27313.8	29898.8	29091.6	28631.2	29486.9	29967.4	32042.3	27673.8	26452.3	25323.6	25699.5	26275	29562.6
1-1_GL0134181;14_GL0031812;17_GL0042801;1A-dyr4-07_GL0095820;2-1_GL0000285;2-1_GL0006662;2-1_GL0056349;2-1_GL0080403;2-1_GL0106280;2-2_GL0045040;2-3_GL0068909;23_GL0073074;3-1_GL0098988;3-6_GL0026546;4-6_GL0066301;5-4_GL0037288;6-1_GL0032759;7-1_GL0028861;7-8_GL0049526;8-1_GL0040669;8-3_GL0068094;G1-5A_GL0085993;MC-6-4_GL0086258;S-Fe20_GL0071005;S-Fe20_GL0098381;S-Fe2_GL0042950	5756.18	5149.84	4568.8	2830.07	2428.6	1643.03	2800.52	2189.79	2570.8	NA	NA	NA	NA	NA	NA
1-1_GL0134181;14_GL0031812;17_GL0042801;1A-dyr4-07_GL0095820;2-1_GL0000285;2-1_GL0006662;2-1_GL0056349;2-1_GL0080403;2-1_GL0106280;2-3_GL0068909;23_GL0073074;3-1_GL0098988;3-6_GL0026546;4-1_GL0013292;4-6_GL0066301;5-4_GL0037288;6-1_GL0032759;7-1_GL0028861;7-5_GL0058989;7-5_GL0143422;7-8_GL0049526;8-3_GL0068094;S-Fe20_GL0071005	58360.9	NA	NA	427776	467313	441550	419788	441369	438922	473264	491310	467794	525871	470525	423841
1-1_GL0134181;14_GL0031812;17_GL0042801;1A-dyr4-07_GL0095820;2-1_GL0000285;2-1_GL0056349;2-1_GL0080403;2-1_GL0106280;2-3_GL0068909;3-1_GL0098988;3-6_GL0026546;4-1_GL0013292;5-4_GL0037288;6-1_GL0032759;7-1_GL0028861;7-5_GL0058989;7-5_GL0143422;8-1_GL0040669;8-3_GL0068094;S-Fe20_GL0071005;S-Fe9_GL0037052	154103	155544	146767	NA	NA	NA	NA	NA	NA	NA	NA	NA	NA	NA	NA
1-1_GL0134181;14_GL0031812;17_GL0042801;1A-dyr4-07_GL0095820;2-1_GL0006662;2-1_GL0056349;2-1_GL0080403;2-1_GL0106280;2-3_GL0068909;23_GL0073074;3-1_GL0098988;4-6_GL0066301;7-8_GL0049526;S-Fe20_GL0071005	NA	NA	NA	NA	NA	12982.3	NA	46587.9	NA	73459.9	NA	76356.2	75040.4	67016.1	66813.2
1-1_GL0134181;14_GL0031812;17_GL0042801;2-1_GL0056349;2-1_GL0080403;2-1_GL0106280;2-3_GL0068909;3-1_GL0098988;3-6_GL0026546;6-1_GL0032759;8-3_GL0068094	NA	3445.6	1719.54	NA	NA	NA	NA	NA	NA	NA	NA	NA	NA	NA	NA
1-1_GL0134181;14_GL0031812;17_GL0042801;6-1_GL0032759	27500.7	26133.3	24503.9	34006.5	32404.9	32114.5	39022.5	39242.9	36099.9	35558.6	NA	NA	NA	NA	NA
1-1_GL0134181;17_GL0042801	23674.7	23595.6	29604.1	34017.9	30786.1	32081.1	NA	33581.3	33497.7	NA	NA	NA	NA	NA	NA
1-1_GL0134181;17_GL0042801;1A-dyr4-07_GL0095820;2-1_GL0000285;2-1_GL0006662;2-1_GL0056349;2-1_GL0080403;2-1_GL0106280;2-3_GL0068909;23_GL0073074;3-1_GL0098988;3-6_GL0026546;4-6_GL0066301;5-4_GL0037288;6-1_GL0032759;7-1_GL0028861;7-5_GL0058989;7-8_GL0049526;8-1_GL0040669;8-3_GL0068094	204970	191870	198200	194905	203535	190379	173902	184070	192421	159916	151376	140971	159374	160415	156094
1-1_GL0134181;17_GL0042801;1A-dyr4-07_GL0095820;2-1_GL0000285;2-1_GL0006662;2-1_GL0056349;2-1_GL0080403;2-1_GL0106280;2-3_GL0068909;3-1_GL0098988;3-6_GL0026546;4-1_GL0013292;5-4_GL0037288;7-1_GL0028861;7-5_GL0058989;8-3_GL0068094;G1-5A_GL0085993;S-Fe2_GL0042950;S-Fe9_GL0037052	25802.2	27535.7	25531	35745.6	34482.4	38793.1	70923.6	77529.2	75541.1	70034.5	64841	64983	76907	60289.4	67188.4
1-1_GL0134181;17_GL0042801;1A-dyr4-07_GL0095820;2-1_GL0006662;2-1_GL0056349;2-1_GL0080403;2-1_GL0106280;2-2_GL0045040;2-3_GL0068909;23_GL0073074;3-1_GL0098988;3-6_GL0026546;4-1_GL0013292;4-6_GL0066301;6-1_GL0032759;7-5_GL0143422;7-8_GL0049526;8-1_GL0040669;8-3_GL0068094;G1-5A_GL0085993;S-Fe20_GL0071005;S-Fe2_GL0042950;S-Fe9_GL0037052	1442.42	NA	1546.41	NA	NA	NA	11672.9	14192.6	14045	44463.5	46437.3	51961.4	38480.8	46740.2	42052.8
1-1_GL0134181;17_GL0042801;2-1_GL0000285;5-4_GL0037288;7-1_GL0028861	13868.3	16516.5	12800.1	21218.4	22054.9	22664	21513.3	25564.8	25357.8	23877.6	22345.8	22672	21680.8	22436.4	24078.4
1-1_GL0134181;17_GL0042801;2-1_GL0000285;5-4_GL0037288;7-1_GL0028861;S-Fe20_GL0071005	150195	135792	144273	148049	149591	146283	140885	142556	148384	116457	131575	122542	115573	118986	122051
1-1_GL0134181;17_GL0042801;2-1_GL0056349;2-1_GL0080403;2-1_GL0106280;2-3_GL0068909;23_GL0073074;3-1_GL0098988;6-1_GL0032759;7-5_GL0058989	NA	16580.3	18227.7	15287.5	16165.4	16126.8	16250.6	15540.7	14424.8	17721.5	18753.7	17912.1	18515.2	16721.1	19176.3
1-1_GL0134181;17_GL0042801;4-1_GL0013292;6-1_GL0032759	8134.51	9906.95	NA	30049.7	28611.6	28278.8	24424.7	29628.8	28539.9	25175.8	20890.4	34140.2	26430	27726.2	24531.7
1-1_GL0134181;17_GL0042801;5-4_GL0037288;6-1_GL0032759;7-1_GL0028861	NA	NA	NA	NA	NA	NA	102578	100102	110949	109134	116040	105454	112982	111397	102724
1-1_GL0134181;17_GL0042801;6-1_GL0032759	15183.3	12828	14581	13616.6	14071.5	14057.1	13650.6	12157.3	12250.2	8352.96	8671.52	7280.63	5935.09	6537.55	8067.85
1-1_GL0134181;17_GL0042801;6-1_GL0032759;7-1_GL0028861	26866.4	28476.2	28088.3	26758.4	29380.8	28906.5	28213.7	22005.7	25609.8	23154.8	NA	26378	26399.4	NA	28397.3
1-1_GL0134181;17_GL0042801;7-1_GL0028861	5437.6	6701.76	6873.67	9487.85	9749.86	8496.08	9260.87	8494.48	8251.56	NA	NA	NA	NA	NA	NA
1-1_GL0134310;14_GL0061776;17_GL0080551;32_GL0096813;Group2-5A_GL0000249;MH-6-4_GL0077714;MH-6-5_GL0076509;S-Fe3_GL0150411	2002.05	NA	2155.92	NA	NA	NA	NA	NA	NA	NA	NA	NA	NA	NA	NA
1-1_GL0134310;Group2-5A_GL0000249;MH-6-4_GL0077714;MH-6-5_GL0076509;S-Fe3_GL0150411	NA	NA	NA	7722.18	7339.05	NA	NA	8651.1	8273.08	NA	NA	NA	NA	NA	NA
1-1_GL0134521	28724.8	21254	29459.6	36826	35242.6	38273.3	31974.9	34987.8	36895	38621.5	38238.9	35317.2	35115.3	36898.2	31790.1
1-1_GL0135235	12688.1	12492.2	12525.4	10762.8	11401	11830.7	11538.9	10983.3	11123.4	9437.77	9832.54	7623.93	10279.9	10011.4	10728.8
1-1_GL0135235;MH-6-3_GL0001202	10243.8	9801.67	9281.27	15876.7	15985.3	17157.3	17612.3	16240.9	16831.2	16604	16634.5	15852.7	16748.6	17161.5	13896
1-1_GL0135247	7638.77	7233.7	7970.78	7133.54	7454.56	7529.8	7347.01	6594.32	7330.38	6299.02	8171.08	9495.15	8386.11	5894.2	8110.83
11_GL0135542;17_GL0083156;1A-dyr4-07_GL0017166;4-5_GL0016620;7-8_GL0063548	7174.25	8653.88	8431.5	8835.77	8493.24	8672.23	7537.69	8151.06	8693.14	6415.45	7188.68	5739.92	7319.77	6599.48	5042.38
11_GL0135542;17_GL0083156;1A-dyr4-07_GL0017166;4-5_GL0016620;7-8_GL0063548;MC-6-1_GL0119203;MC-6-4_GL0122210	4241.25	5103.69	4049.28	7674.29	NA	NA	NA	NA	13868.2	NA	NA	NA	NA	NA	NA
11_GL0135542;17_GL0083156;1A-dyr4-07_GL0017166;4-5_GL0016620;7-8_GL0063548;MC-6-1_GL0119203;MC-6-4_GL0122210;S-Fe20_GL0110454	7567.25	7184.32	6367.79	NA	NA	NA	NA	NA	NA	NA	NA	NA	NA	NA	NA
11_GL0135547	6634.66	5636.39	5622.64	NA	NA	NA	NA	NA	6661.54	NA	NA	NA	NA	NA	NA
1-1_GL0135553	52831.4	51905	48165.2	67815.7	70058.4	68868.1	69202.2	66445.5	63140.2	58787.4	55910.9	55861.1	55527	60115.2	58280.1
1-1_GL0135577	8494.09	8481.65	7687.83	8703.57	7763.86	7778.59	6850.64	8725.23	7230.57	5320	6685.36	5995.45	NA	NA	NA
1-1_GL0135577;1-1_GL0151341;1A-dyr2-07_GL0006914;23_GL0135535;3B-dyr36-06_GL0038076;4-1_GL0078425;5_GL0164578;6-3_GL0027473;8-1_GL0094982;G1-1A_GL0119263;G1-7A_GL0066840	33188.2	24048.4	25444.9	65284.7	68287.9	68570.5	76864.8	74235.7	82377.7	84948.4	88293.5	87671.9	93117.5	100053	89708.3
1-1_GL0136062;1-2_GL0027772;1-3_GL0120417;14_GL0134251;17_GL0016315;20_GL0019165;26_GL0040665;26_GL0086479;3-3_GL0023851;37_GL0000377;5-5_GL0091302;5-7_GL0031363;5-8_GL0134737;7-8_GL0001560;8-5_GL0127946;8_GL0060260;G1-3A_GL0025321;G1-4A_GL0018402;G1-8A_GL0084476;Group2-3A_GL0031819;Group2-5A_GL0117049;Group2-7A_GL0060598;Group2-8A_GL0134702;MC-0-3_GL0059095;MC-6-1_GL0047944;MC-6-1_GL0090469;MC-6…	24975.7	25114.2	24002.1	9502.89	9300.25	11024.3	18909.4	20634	19486.8	16850.2	18068.8	14058.4	14084.1	16412.2	16766
1-1_GL0136144	9125.18	8968.41	9628.26	9130.5	9833.77	9547.7	10157.8	11619	10420.7	11622.4	12720.5	12395.6	11608.4	10087.6	8778
1-1_GL0136144;1A-dyr1-07_GL0036169	12496.8	12104.7	14066.2	12888.6	11052.4	12559	13416.5	13323.8	13072.1	8487.85	9242.3	9363.42	11067.9	7537.43	9722.28
1-1_GL0136841	1030.6	1090.82	1297.47	1090.2	NA	1209.62	1516.18	NA	NA	NA	NA	NA	NA	NA	NA
1-1_GL0136841;23_GL0148044;3-1_GL0093950;5-8_GL0139458;MC-6-4_GL0039328;S-Fe17_GL0096003	20140.1	NA	21160	16117.8	36728.9	40725.6	34941.5	39917.6	38962.5	37110.8	39205.7	41149.4	36426	37829	31213.9
1-1_GL0136841;3-1_GL0093950;5-8_GL0139458	14743.1	15329.9	16179.2	15189.6	NA	NA	NA	NA	NA	NA	NA	NA	NA	NA	NA
1-1_GL0136841;MC-6-4_GL0039328	2509.87	2079.83	2447.12	1688.82	1781.04	NA	1529.46	1706.2	NA	NA	NA	NA	NA	NA	NA
1-1_GL0136841;MC-6-4_GL0039328;S-Fe17_GL0096003	5294.08	5343.96	5864.4	5358.21	5379.84	5910.86	6241.21	5748.58	5647.06	NA	NA	7861.28	9969.97	NA	NA
11_GL0137061	9142.86	9798.88	8225.27	9552.59	9849.49	10680.1	9093.62	9080.53	9912.88	10440.8	8772.22	10302	10352	9291.8	6713.51
11_GL0137062	2606.1	2846.44	2821.36	2760.74	2731.76	2451.61	2276.81	2937.55	1888.1	NA	NA	NA	NA	NA	NA
11_GL0137082	17695	18082.4	18382.5	18424.7	19321	19444.1	20523.9	19748.4	19676.5	18489	20687.9	19953.3	20134.6	21794.9	19987.8
1-1_GL0137416	12995.9	12878.6	12208.4	14114.8	16088.4	15047.2	16220.4	15673.3	14911.1	15545.3	15367.5	15125.5	16746.3	16217.2	17820.7
1-1_GL0137633	14087.1	13319.4	13584.8	14440.6	13303.4	14050.2	13275.5	12378.9	13587.3	11408.5	10254.3	10165.5	11696.2	11231.1	12081.3
1-1_GL0137774	13022.7	10504.7	11386.7	14091.9	12393.7	13032.7	13756.3	11694.8	12620.1	NA	NA	NA	NA	18302.6	19812.7
1-1_GL0137774;10_GL0030713;MC-0-1_GL0100560	6246.12	8051.03	7803.23	NA	NA	NA	NA	NA	NA	NA	NA	NA	NA	NA	NA
1-1_GL0137774;MC-0-1_GL0100560	54810	48833.9	47127	45752.5	40865.5	50587	47963.5	51055.9	51277.1	48603.8	48300.1	40275.1	50326.3	42660.8	52239.7
11_GL0137832	5633.49	5397.04	5219.2	5521.01	6205.92	5078.39	7321.66	7778.51	NA	NA	NA	NA	NA	4278.61	NA
11_GL0137832;2-3_GL0088585;6-2_GL0053620	3420.9	3484.26	3275.04	2250.68	2559.39	2753.96	3142.68	2416.37	2151.79	3001.94	NA	NA	NA	NA	NA
1-1_GL0137848	3834.17	4165.88	3663.43	4690.49	5282.99	4548.31	4666.3	4302.92	4568.35	4651.36	5417.24	5084.8	6758.94	5191.21	5231.69
1-1_GL0137848;1-1_GL0145833;16_GL0104380;G1-1A_GL0063364;MH-0-5_GL0032691;MH-6-2_GL0093842;S-Fe10_GL0001359;S-Fe10_GL0043374	33017.3	32842.4	33634.9	35028.4	35053.1	35362.8	37096.9	37564.8	36051.6	33055.1	32147	35220.9	35714.8	27454.2	31936.3
1-1_GL0138491;2-1_GL0068363;2-2_GL0154178;2-3_GL0004587;2-3_GL0071040;3-1_GL0054518	8136.94	7687.24	8921.04	10096.7	8778.23	10512.1	8694.06	9396.33	11599.6	3717.98	3768.15	4060.12	3575.46	5187.02	10468.2
1-1_GL0138491;2-1_GL0068363;2-2_GL0154178;2-3_GL0004587;2-3_GL0071040;3-1_GL0054518;5-8_GL0063331	24498.2	33051.5	24002.1	32347	35405.4	25292	29649.5	31269.7	34465.8	23023.6	22232.3	20086.3	20139.3	17653.1	21760
1-1_GL0138491;2-2_GL0154178;2-3_GL0004587;2-3_GL0071040;2-4_GL0007561;3-1_GL0054518;54_GL0082039;8-3_GL0010235	3967.6	3689.93	2925.81	1982.97	1022.88	519.633	1421.09	1656.96	1019.41	NA	NA	NA	NA	NA	NA
1-1_GL0138491;2-3_GL0004587	98089	82095.9	86211.3	77851.4	73740	77214	81558.4	77427.4	84955.7	NA	NA	NA	NA	NA	NA
1-1_GL0138491;2-3_GL0004587;2-3_GL0071040;3-1_GL0054518;5-8_GL0102626	134889	138073	143856	178257	172602	189602	147982	145443	154924	158713	178783	155903	159981	141176	147786
1-1_GL0138491;2-3_GL0004587;3-1_GL0054518	4721.28	4047.88	5205.85	2759.93	2483.89	2957.64	NA	2563.18	2629.71	NA	NA	NA	NA	NA	NA
11_GL0139020	9966.14	9681.88	9789.35	9604.78	9111.59	10168.4	9189.79	9390.95	9789.3	9097.11	7079.64	8941.18	10852.9	9254.92	8530.9
11_GL0139065	17660.9	19244.5	17025	31425.4	30941.3	32745.3	41044.1	48646.1	43230.5	40599.6	48834.1	41224.3	52218.7	52637.1	48535.8
11_GL0139065;6-6_GL0114404	1860.34	1657.42	1586.6	2244.47	2728.86	2785.93	2484.89	NA	NA	NA	NA	NA	NA	NA	NA
1-1_GL0139097;17_GL0109723;17_GL0132349	5058.26	4536.39	5049.03	5252.77	6120.85	5324.87	5079.96	5407.77	4847.01	6348.8	NA	5994.74	NA	NA	6636.35
1-1_GL0139097;17_GL0109723;17_GL0132349;1A-dyr4-07_GL0054950;2-5_GL0033775;Group2-1A_GL0135083;S-Fe9_GL0044734	10679.5	12714.8	12442.9	13266.5	13548.5	13643.3	14904	14532.2	12028	10950.2	11659.7	9923.9	9905.26	NA	NA
1-1_GL0139097;17_GL0109723;17_GL0132349;1A-dyr4-07_GL0054950;3-5_GL0000013;4-8_GL0094516;7-1_GL0037229	41131.8	40149.1	43495.2	48469.3	56457.8	56435.7	37214.6	35949.9	38254.9	60892.2	60836.6	56148.8	54657.3	54602.4	57688.1
1-1_GL0139097;17_GL0109723;17_GL0132349;1A-dyr4-07_GL0054950;3-5_GL0000013;4-8_GL0094516;7-1_GL0037229;S-Fe20_GL0145391	10282.1	13138.6	11583.3	18603.7	17854.4	18239	15658.7	18392.6	19245.9	NA	NA	NA	NA	NA	NA
1-1_GL0139097;17_GL0109723;17_GL0132349;2-5_GL0033775;4-8_GL0094516;Group2-1A_GL0135083	2548.62	2101.83	1913.43	1000.37	NA	NA	NA	2173.33	1392.25	NA	NA	NA	NA	NA	NA
1-1_GL0139097;17_GL0109723;17_GL0132349;4-8_GL0094516;7-1_GL0037229	85578.9	54611.7	86256.7	102598	108906	131768	112866	78446.1	89402.9	83846.7	85090.3	NA	91438.5	72202.2	NA
1-1_GL0139097;17_GL0109723;17_GL0132349;7-1_GL0037229;S-Fe20_GL0145391;S-Fe9_GL0044734	2763.52	799.123	1250.77	10031.3	8534.96	9298.24	5437.35	7513.84	7921.14	8456.88	6260.59	7422.07	8099.63	7624.55	9685.62
1-1_GL0139144	3875.69	4504.36	4154.83	3643	3233.6	3205.34	3257.46	NA	3345.89	NA	NA	NA	NA	NA	NA
1-1_GL0139144;10_GL0030637;2-1_GL0118128;29_GL0062680;6-1_GL0025377	5979.69	5243.44	4269.32	6199.81	5517.84	5233.48	5213.35	6911.85	6924.54	3134	3446.18	NA	4134.11	4864.71	3239.08
11_GL0139318	19552.5	18753.6	19008.8	23769	24153.8	26259	22655.2	23822.7	22584	19842	22465.4	20849.2	17743.9	18244.1	21489.6
11_GL0139318;1A-dyr4-07_GL0090469;2-1_GL0112186;4-1_GL0011555;4-1_GL0013487;4-1_GL0057479;8_GL0053219;MC-6-1_GL0037649	55933.8	56472.3	50215	45005.9	46519.4	38713.2	43654.3	47409.7	47766.3	25266.2	26381.5	15704.3	22683.6	23787	19953.5
11_GL0139318;1A-dyr4-07_GL0090469;4-2_GL0077478;6-2_GL0055252;Group2-3A_GL0036528;Group2-4A_GL0041798;Group2-5A_GL0020455;S-Fe20_GL0089803;S-Fe20_GL0180068	39225.9	36577.6	38252.6	41387.3	40747.8	42551.2	40429.4	40963.1	45662.7	37733.7	NA	38893.9	34738.1	33282.6	33000.4
11_GL0139318;1A-dyr4-07_GL0090469;4-8_GL0028110;8_GL0053219;Group2-3A_GL0036528;Group2-5A_GL0020455;S-Fe20_GL0089803;S-Fe20_GL0180068	NA	480.894	438.791	NA	NA	NA	NA	NA	NA	NA	NA	NA	NA	NA	NA
11_GL0139318;2-3_GL0105804;Group2-4A_GL0041798	16644.3	14173.1	15439.5	NA	NA	NA	NA	NA	NA	NA	NA	NA	NA	NA	NA
11_GL0139318;4-1_GL0057479;4-8_GL0028110;Group2-4A_GL0041798;Group2-5A_GL0020455;S-Fe20_GL0089803	59646	61472.2	62509.5	59264.1	60150.9	63496.4	55978.5	50847.6	52725.4	43863.5	47984.4	45099.2	44207.8	33186.4	47581.4
11_GL0139318;S-Fe20_GL0089803	20823	19422.3	19819.1	21186.4	24067.3	20756.8	19057.1	18318.6	19509.1	20024.2	18219.2	19220.7	17824.7	21181.1	18565.4
11_GL0139331	12801.4	12675.3	12699.6	12121.1	12897.5	12402.9	10950.3	11826.6	12530	14731.6	13745.9	14739.9	11687.2	12501.8	12660.2
11_GL0139331;4-7_GL0146230;S-Fe20_GL0019594	10462.1	9861.54	10228.7	12324.8	11745.2	10058.7	NA	NA	NA	NA	NA	NA	NA	NA	NA
11_GL0139734	4571.88	4392.08	5053.54	5511.9	6680.57	NA	5705.82	8991.05	NA	6952.13	NA	NA	NA	NA	NA
11_GL0139734;20_GL0156837;6-3_GL0040209	31361.9	33589.1	33380.1	29286.6	31068.3	31759	33041.2	34280.7	34295.6	28681.6	27866.5	24775.4	26034.8	22419.7	29580
11_GL0139734;Group2-3A_GL0028219	3242.31	3229.3	5095.68	7507.23	6288.34	8791.27	8157.18	7875.85	7216.45	2627.9	2818.77	3097.4	NA	2147.55	NA
11_GL0139858	NA	28609.4	1844.78	33193.6	33736.4	28730.2	32746.4	30718.8	32785.6	24040.3	31696.4	24502	26240.7	37121.7	33856.6
11_GL0139858;4-4_GL0041848;4-5_GL0107020;4-8_GL0028287;5-1_GL0032559	NA	NA	NA	NA	NA	NA	NA	NA	23093.6	NA	NA	NA	NA	NA	NA
11_GL0139858;4-5_GL0107020;5-1_GL0032559;6-4_GL0083690;S-Fe20_GL0000975;S-Fe3_GL0046178	9177.01	7960.32	7576.45	6980	5696.13	4433.23	6891.74	6068.07	5883.86	3056.15	NA	NA	3414.79	NA	3515.37
1-1_GL0139943	14562.4	11656.9	14652	17084.6	15637.3	16343.6	13051.7	15451.5	14674.9	15035.7	12277.6	18713.2	19348.2	18206.5	16537.2
1-1_GL0139943;3-8_GL0046192;5-2_GL0066386;5-3_GL0066451;7-5_GL0133212;G1-3A_GL0099545;S-Fe8_GL0284423	69342.4	65506.8	67036.5	47283.8	41715.6	32081.5	NA	64114.8	65741	NA	NA	NA	NA	NA	NA
1-1_GL0139943;3-8_GL0046192;5-2_GL0066386;5-3_GL0066451;7-5_GL0133212;S-Fe8_GL0284423	7585.72	7453.78	8445.54	NA	NA	17942.8	NA	NA	NA	NA	NA	NA	NA	NA	NA
1-1_GL0139943;3-8_GL0046192;G1-3A_GL0099545	24867.7	25535.2	25441.2	NA	NA	NA	NA	NA	NA	NA	NA	NA	NA	NA	NA
1-1_GL0139949	18943.8	17640.7	17890.6	19117.9	18206.4	18531.3	17918.4	18183.4	15786.2	11763.9	13625.5	13924.3	9792.61	8902.48	11171.1
11_GL0139961	10028	10508.7	8344.38	NA	8461.15	6666.8	6726.18	4366.73	5930.54	7920.35	8319.33	8637.08	9534.17	10469.5	8685.95
11_GL0139961;11_GL0143116;20_GL0082096;20_GL0147742;6-7_GL0016691;8-3_GL0101808;Group2-7A_GL0036496;S-Fe2_GL0146242;S-Fe7_GL0129548	23743.9	22770.1	23120.9	26838.1	28292.3	28983	24143.9	23299.6	21979.6	17944.9	20145	17473.3	15865.9	7224.01	13118.3
11_GL0139961;4-8_GL0060722;5-4_GL0117453;8-3_GL0101808;S-Fe2_GL0146242;S-Fe7_GL0129548	196344	190299	193264	222979	226465	229996	NA	223751	217318	NA	NA	NA	NA	NA	NA
11_GL0139961;6-7_GL0016691	27558.2	21247.5	24843	29721.9	23749.9	32403.8	30999.5	29632.1	32105.9	29572.9	26816.7	26322.1	28968.3	29114.1	22666.9
11_GL0140125	5132.85	5556.13	4744.29	4357.28	5005.28	4845.02	5488.5	4824.5	5019.16	4860.68	4386.6	NA	NA	NA	NA
1-1_GL0140275	56235.9	51693.5	48390.3	48816.9	48462	38301.7	53975.9	58130.4	62450	20985.2	19839.8	18791.9	33852	36983.4	37982.5
1-1_GL0140275;1_GL0095036;2-1_GL0087638	NA	NA	41437.5	33262.9	35575.9	35999.9	18782.5	19951.4	15660	NA	NA	NA	4814.75	4322.32	5505.32
1-1_GL0140287;2-1_GL0031576;6-2_GL0039186;6-2_GL0084710;Group2-2A_GL0046340;S-Fe12_GL0048418	NA	2914.7	3955.12	NA	NA	NA	NA	NA	NA	NA	NA	NA	NA	NA	NA
1-1_GL0140287;2-4_GL0036412;2-8_GL0114803;3B-dyr36-06_GL0014778;6-2_GL0039186;6-2_GL0084710;Group2-8A_GL0050754;S-Fe12_GL0048418	6309.09	5800.02	5298.53	NA	NA	NA	NA	NA	NA	NA	NA	NA	NA	NA	NA
1-1_GL0140287;2-4_GL0036412;34_GL0024707;6-2_GL0039186;S-Fe12_GL0048418	9119.52	12378.6	8510.09	28232	26601.6	26901.1	28565.8	24744	25117.5	21942.9	24474.1	21710.4	20928	23995.9	22825.7
1-1_GL0140287;2-6_GL0065188;3B-dyr36-06_GL0014778;6-2_GL0039186;S-Fe12_GL0048418	37854	35506.2	34759.6	41630.8	40062	41530.5	NA	45530.5	47201.1	49576.8	NA	43156.9	55197.1	47788.3	NA
1-1_GL0140363	4258.19	4007.01	3642.04	4083.52	4544.5	4226.84	3914.39	3939.76	5109.19	NA	4863.89	4006.12	NA	NA	7150.35
11_GL0140676	3696.76	4880.96	4082.14	NA	NA	NA	5462.68	NA	6917.1	NA	NA	NA	NA	NA	NA
1-1_GL0141160;11_GL0009244;11_GL0121666;11_GL0142670;11_GL0147059;17_GL0085783;1A-dyr2-07_GL0016474;1A-dyr4-07_GL0054274;2-3_GL0102263;20_GL0036609;20_GL0119273;22_GL0069193;26_GL0103357;3-6_GL0057763;4-2_GL0043514;4-3_GL0015482;5-1_GL0005641;G1-1A_GL0065512;G1-5A_GL0050443;G1-5A_GL0050915;G1-5A_GL0104094;Group2-8A_GL0236582;S-Fe3_GL0044161	97695.3	88495.7	90568.1	NA	NA	NA	NA	NA	NA	NA	NA	NA	NA	NA	NA
1-1_GL0141160;11_GL0121666;11_GL0142670;11_GL0147059;1A-dyr4-07_GL0054274;3-6_GL0057763;G1-1A_GL0065512;G1-5A_GL0050443	1526.87	1583.41	2011.7	NA	NA	NA	NA	NA	NA	NA	NA	NA	NA	NA	NA
1-1_GL0141160;11_GL0147059	69888.7	74997.6	76424.3	46844.6	50958.1	56515.8	57979.5	56368.2	53626.8	48895.1	53988.3	59546.6	48045.3	48169.4	49486.5
1-1_GL0141547	2906.11	3016.72	3112.71	1836.42	2090.68	1743.37	1447.74	1525.65	NA	NA	2066.73	2391.64	NA	NA	NA
1-1_GL0141547;20_GL0112751;34_GL0024705;5-8_GL0049679;7-5_GL0112822;G1-5A_GL0090450	3322.14	4386.53	NA	30282	31332.1	31312.3	30919.8	32414.4	31187.9	32952.1	33755.6	30769.7	26938.1	39680.8	31655.5
1-1_GL0141547;34_GL0024705	16077.6	12195.8	10490.7	88294.5	81371.8	92309.8	NA	112300	105730	NA	NA	NA	NA	NA	NA
1-1_GL0141547;34_GL0024705;5-8_GL0049679;G1-5A_GL0090450	8992.61	23060.7	12430.4	29509	28197.2	25343.4	30326.5	31491.8	32182.1	NA	NA	NA	NA	NA	NA
1-1_GL0141547;5-8_GL0049679;7-5_GL0112822;G1-5A_GL0090450	NA	164645	158443	NA	NA	NA	59839.1	NA	NA	169531	NA	173636	164057	154504	144774
1-1_GL0141548	9824.95	11282.1	10140.8	9940.86	9533.95	8833.8	10464.3	9900.3	11230.6	11259.1	9071.77	7844.54	9117.74	10869.1	11894
1-1_GL0141548;2-1_GL0091641;4-1_GL0023022;4-1_GL0071104;5-2_GL0067967;S-Fe20_GL0001047	207056	211377	215575	221467	226404	239953	249428	236345	274607	261886	285874	257763	275652	246138	230264
1-1_GL0141556;1-2_GL0053410;11_GL0045958;11_GL0070423;1A-dyr2-07_GL0001240;1A-dyr4-07_GL0045295;2-3_GL0056575;2-4_GL0088899;2-5_GL0052916;20_GL0031919;20_GL0054158;26_GL0139638;2A-dyr14-07_GL0040025;2B-dyr19-06_GL0035065;2_GL0122601;4-1_GL0058646;5_GL0165385;6-2_GL0032257;6-4_GL0109250;6-5_GL0085332;7-6_GL0129373;G1-1A_GL0100166;G1-4A_GL0033653;Group2-6A_GL0035610;Group2-6A_GL0107982	42593.9	NA	46556	31423.6	29616.5	36412.1	23366.7	23787.3	22272.1	NA	NA	NA	NA	NA	NA
1-1_GL0141556;1A-dyr3-06_GL0023526;2B-dyr19-06_GL0035065;5_GL0165385;6-4_GL0109250	4629.52	4049.1	4291.5	5447.73	4314.48	4566.81	4124.61	4047.13	4496.74	5181.88	3738.71	5260.37	NA	3716.59	3943.74
1-1_GL0141556;2B-dyr19-06_GL0035065;5_GL0165385;6-4_GL0109250	5548.65	5637.3	6670.25	NA	NA	NA	NA	NA	NA	NA	NA	NA	NA	NA	NA
1-1_GL0141625	7737.46	6998.47	6729.16	5583.63	6239.3	4565.65	4573.09	5191.14	6273.04	NA	NA	8457.39	8246.43	NA	NA
1-1_GL0141625;G1-1A_GL0096658;MC-0-1_GL0060608;MC-0-3_GL0016776;MH-0-4_GL0056065	38010.6	NA	NA	27378	28915.5	28399.7	22422	27880.9	28296.6	25497.9	23959.5	NA	NA	21036.5	NA
1-1_GL0141626;13_GL0005917;20_GL0019339;3-1_GL0019703;G1-1A_GL0026939;MC-0-1_GL0020539;MC-6-1_GL0006664;S-Fe10_GL0140499	5378.77	5250.79	5832.25	5491.97	4087.64	5470.22	5611.33	5589.79	6268.59	5850.1	6750.52	5365.99	6152.82	6711.43	4105.58
1-1_GL0141631	1497.09	1476.29	1721.83	1348.47	1280.62	1171.97	1349.88	1352.08	1693.96	NA	NA	NA	NA	NA	NA
1-1_GL0141631;1-3_GL0084986;1-8_GL0068166;10_GL0065656;10_GL0066865;1A-dyr2-07_GL0028331;1B-dyr11-07_GL0006909;20_GL0034540;4-1_GL0065988;MC-0-1_GL0089057;MC-6-2_GL0022966;MC-6-5_GL0012643	11396.3	5476.54	11402.1	17775.2	16738.7	16117.9	15427.5	16743.6	16903.4	26974.9	26905.8	22519.8	20863.4	19854.7	21909.8
1-1_GL0141678;Group2-3A_GL0001191	1113.67	1639.34	1347.77	1780.2	1978.79	1423.52	1790.24	1924.54	1959.52	NA	NA	NA	NA	NA	NA
1-1_GL0141777	30882.1	30796.4	28829	28263.2	27475.7	27292.4	25404.5	25911.9	25613	24179.9	20666.5	24366.5	20439.7	19581.5	21592.6
1-1_GL0141777;20_GL0156552;8-3_GL0044718;MH-6-2_GL0110604;S-Fe2_GL0023820	9945.01	9679.68	11198.1	9464.94	10029.7	9312.22	9308.31	10117.6	8879.25	5860.79	7640.48	9322.11	5318.06	NA	6927.26
1-1_GL0141777;20_GL0156552;Group2-8A_GL0099369;Group2-8A_GL0161845;MH-6-2_GL0110604	49372.3	45714.7	37122.8	38517	46685.4	38378.7	43903.1	42921.6	38803.9	42194.2	45265.1	43748.4	40586	41792.1	35681
1-1_GL0141777;20_GL0156552;Group2-8A_GL0161845;MH-6-2_GL0110604	40790.7	38459.8	40212.7	40623.6	39397.4	38798.1	40128.3	40589.9	39972.6	32219.1	31390.4	26937.7	25922.9	27120.4	23370
1-1_GL0141777;20_GL0156552;MH-6-2_GL0110604	40881.4	41565.2	39410.6	48671.6	49775.3	47301.7	47888.8	50353.7	48776.7	52357.7	53430	46389.5	47224.1	48443	49341.9
1-1_GL0141777;8-1_GL0122035;MC-6-4_GL0116654;MH-0-5_GL0066910	5041.21	NA	NA	NA	19960.6	NA	NA	44910.5	41397.3	NA	NA	NA	NA	NA	NA
1-1_GL0141777;Group2-8A_GL0161845	13155.5	15838.1	13505.4	11601.6	NA	13061.2	14738.7	NA	10724.5	NA	NA	NA	NA	NA	NA
1-1_GL0141777;Group2-8A_GL0161845;MH-6-2_GL0110604	NA	5529.71	6125.82	NA	NA	NA	NA	NA	NA	NA	NA	NA	NA	NA	NA
1-1_GL0141777;MC-6-4_GL0116654	19073.9	13451.7	14920.1	13458.6	16297.3	13013.7	11356.6	12492.2	10164.8	NA	9339.3	NA	NA	NA	NA
1-1_GL0141777;MH-6-2_GL0110604	7597.11	7136.24	6789.63	5869.81	5940.75	6249.49	4787.19	5536.66	5592.36	3888.96	5735.35	4493.29	6338.67	5518.72	5228.57
11_GL0141839	9370.28	8284.97	9489.73	10370.4	11191.3	10446.2	10470.1	11088.1	10127	9222.23	8649.18	11522.8	9807.96	8845.43	8311.94
1-1_GL0142511	13721.4	12869.9	13022.3	12591.8	12409.2	12683.7	11472	11024.3	10896	10439.6	10092.1	9485.37	8552.46	8938.53	9314.35
1-1_GL0142511;1-2_GL0095952	24515.2	23647.5	21491.4	26102.8	25757.4	24998.1	26111	27521.1	26836	25225	26159.2	23736.7	21592.9	20362.5	19982
1-1_GL0142511;1-2_GL0095952;1-2_GL0106009	13704.8	12246.8	13635.9	46003.7	43088.7	41966.7	45473.9	44985.1	43726.7	40778.1	43463.1	51872.6	46725	45590.9	49455.8
1-1_GL0142511;1-2_GL0095952;1-2_GL0106009;8-7_GL0038437;S-Fe8_GL0085783	5835.73	7390.63	NA	9816.25	8899.88	7891.89	7596.85	8148.01	7395.75	NA	NA	NA	NA	NA	NA
1-1_GL0142511;1-2_GL0095952;6-2_GL0007112;MH-6-1_GL0019952;S-Fe20_GL0181977	NA	NA	NA	28886.6	NA	NA	NA	NA	31963	NA	NA	NA	NA	NA	NA
1-1_GL0142511;1-2_GL0095952;8-7_GL0038437;S-Fe8_GL0085783	12660.5	12575.7	12703.5	13576.1	11918.9	11959.5	12563.5	10165.7	12048.2	7978.97	7630.98	6686.39	6230.35	4854.66	1878.39
1-1_GL0142511;1-2_GL0095952;S-Fe2_GL0066888	25549.3	23056	23098.4	32445.4	33359.2	31117.4	28105.4	26209.8	26547.4	35318.5	27147	25741.2	25501	21914.2	NA
1-1_GL0143109	4115.04	4418.14	3468.97	5760.39	5610.47	6137.45	5629.12	5919.32	4701.17	NA	5667.42	3448.85	6670.46	NA	4644.35
1-1_GL0143109;G1-1A_GL0100813	10452.7	17337.3	17499.3	10593	12075.6	12207.8	9310.74	8545.31	8113.84	8639.67	9758.93	7642.33	8658.44	9571.81	11157.8
11_GL0143116	44677.7	42509.5	45594	50677.6	44193.6	48073.9	52473.1	48628.4	54348.4	40130.6	36154.5	37360.1	46959.3	42123.5	45995
11_GL0143116;7-5_GL0149953;8-3_GL0101808;S-Fe2_GL0146242;S-Fe7_GL0129548	33461.9	NA	NA	NA	NA	NA	NA	NA	NA	NA	NA	NA	NA	NA	NA
1-1_GL0143695;2-1_GL0000331;2-1_GL0024447;2-2_GL0046102;2-5_GL0012957;8-5_GL0135920	20786.5	16659	16543.1	90632.4	93992.8	96081.5	121294	124347	115990	109184	108424	109879	105065	121318	111381
1-1_GL0143695;2-1_GL0000331;2-1_GL0024447;2-5_GL0012957;8-5_GL0135920	17572.8	15951.4	16715.8	18363.4	12845.8	8156.9	17962.3	19413.4	18616.5	6574.58	8001.19	6032.6	17077.9	16756	10477.2
1-1_GL0143695;2-1_GL0024447;2-5_GL0012957	139329	132012	136797	131482	132396	112008	123292	117234	113805	86671.4	82058.1	76870.5	74799.8	67054.5	59800.9
1-1_GL0143695;2-1_GL0024447;2-5_GL0012957;8-5_GL0135920	1918.5	1456.4	1433.06	1714.31	1671.79	596.562	1583.92	1135.85	1027.68	NA	NA	NA	NA	NA	NA
1-1_GL0143705	7984.62	9090.54	7833.46	8902.91	9232.22	9142.02	10088.8	9844.88	9303.84	9102.08	6822.31	10378.5	NA	NA	9421.55
1-1_GL0143705;1-3_GL0119111;1A-dyr2-07_GL0072819	4071.94	5090.43	4619.55	14433.9	14717.2	13961.9	15114.3	13534	14996.4	11741.4	14578.4	15136.2	14325	13188.3	13075.9
1-1_GL0143705;1-3_GL0119111;1A-dyr2-07_GL0072819;G1-1A_GL0054686;G1-1A_GL0096517;MC-0-1_GL0087548;S-Fe10_GL0153182	77115.9	80569.7	76779.4	77521.3	75998.1	86052.7	71867.7	80555.6	81121.6	73485.3	61277.7	61223.3	40182.6	38867.2	59820.6
1-1_GL0143705;1-3_GL0119111;1A-dyr2-07_GL0072819;G1-1A_GL0054686;MC-0-1_GL0087548;S-Fe10_GL0153182	47734.6	46888.2	45499.5	50101.7	53975.6	52894.1	43480.3	53744.4	54982.1	NA	NA	NA	NA	NA	NA
1-1_GL0143705;1A-dyr2-07_GL0072819	424.57	258.986	424.496	NA	NA	NA	NA	NA	NA	NA	NA	NA	NA	NA	NA
1-1_GL0143705;1A-dyr2-07_GL0072819;23_GL0108550;G1-1A_GL0054686;G1-1A_GL0096517;MC-0-1_GL0087548	9989.48	10917.3	10603.1	10197.6	8765.31	8408.76	10153.8	8967.13	9900.52	5607.31	5514.02	4874.17	4651.39	3680.98	4041.98
1-1_GL0143705;G1-1A_GL0096517;S-Fe10_GL0153182	1100.32	891.476	753.281	732.08	436.936	NA	NA	597.713	703.161	NA	NA	NA	NA	NA	NA
1-1_GL0143732;MH-6-3_GL0055617;MH-6-3_GL0137044	1893.01	1905.68	1934.09	2685.07	2174.12	1941.47	2474.56	2046.98	2162.43	NA	NA	2759.28	NA	NA	NA
1-1_GL0143854	4583.15	4388.64	4891.18	3387.87	3366.69	3283.04	3128.31	3493.07	3220.05	2685.1	2641.8	2455.72	NA	3045.11	2657.1
11_GL0144106	1798.36	1631.59	2006.26	1696.76	1704.45	1695.62	1785.67	2031.56	1355.5	NA	NA	NA	NA	NA	NA
1-1_GL0144128	4376.35	5722.73	4981.73	5219.06	5236.18	5252.93	5540.26	5302.74	5496.91	3685.63	3186.89	4963.08	NA	NA	5461.15
1-1_GL0144133	11721.3	10370.9	11393.2	9841.86	10248.5	9923.61	9602.78	9251.78	9548.34	NA	5624.97	8874.26	8643.67	NA	NA
1-1_GL0144660	5069.41	4606.6	4914.89	4158.73	4660.53	3727.95	4388.51	4841.28	4175.84	NA	NA	NA	NA	NA	NA
1-1_GL0144660;6-4_GL0065486	43399.6	41868.9	42481.7	54298	53890.5	55405.3	51886.7	56162.3	53523.4	52450.1	52522	53813.8	50028.5	49023	48134
1-1_GL0144661	9659.41	9886.53	9911.57	9213.04	9405.64	9572.91	8811.08	9765.77	9630.32	8699.13	7494.41	8902.97	10312.6	5511.96	8302.75
1-1_GL0144661;11_GL0043820	18631.3	19021.6	13718.4	36833.9	34979.9	35473.4	39505.3	40403.2	38227.2	30119.5	33839.8	34927.5	40260.6	39605.4	30933.8
1-1_GL0145214	NA	NA	NA	15671.2	NA	15078.3	14116.8	14091.1	13632.3	20818.2	NA	13964.8	NA	NA	16253.4
1-1_GL0145214;11_GL0053374;1A-dyr4-07_GL0028776;2-1_GL0061307;8_GL0038333;Group2-7A_GL0057465;S-Fe2_GL0192770	38715.5	37986.6	40074.7	NA	NA	43794.9	NA	NA	50887.1	NA	NA	NA	NA	NA	NA
1-1_GL0145214;S-Fe2_GL0192770	838.426	586.343	641.195	9046.38	9817.63	9332.55	9809.48	9025.12	8843.84	10876.7	6874.89	8171.36	8531.2	9402.54	6934.76
11_GL0145605	2539.15	2855.52	2805.04	2230.83	2224.4	2199.65	1898.27	2167.74	1621.8	2805.62	2055.12	2108.26	NA	2585.63	1843.07
1-1_GL0145833	12203.6	12780.5	10652.2	13652.1	14345	13250.9	15710.6	15721.2	14657.2	13879.5	14693.7	15983.7	13453.3	17279.9	16316.3
11_GL0145987	1338.09	1406.9	1272.11	1404.5	1097.51	1258.72	853.315	1237.68	1139.37	NA	NA	NA	NA	NA	NA
11_GL0145987;Group2-1A_GL0058066	16788.5	16105.6	16754.2	16070.9	17924.2	17117.8	15916.8	14580	13649.6	10382.9	11146.1	9524.25	8319.2	8975.29	7239.11
11_GL0146410;31_GL0054966;Group2-3A_GL0091167	14007.1	10323.7	13460.5	21296.1	20745.3	20787	25266.7	24412	24477.5	24016.3	25017.5	24759.4	21685.5	20531.6	22042.4
1-1_GL0146495	14299.2	13922.2	14789.6	14742.9	13914.7	13045.6	13439.6	12908.1	13892.9	14746.2	14920.9	13756.2	14313.9	12767.2	13387.5
1-1_GL0146495;1A-dyr4-07_GL0040112;20_GL0110156;4-2_GL0010291	116405	116045	113620	107664	114723	108203	104634	102325	102090	103845	98607.7	101060	120216	113903	104288
1-1_GL0146495;1A-dyr4-07_GL0040112;2-1_GL0004454;2-1_GL0010197;2-2_GL0014660;2-5_GL0024453;20_GL0110156;3-8_GL0027844;4-1_GL0005092;4-1_GL0043965;7-1_GL0041687;7_GL0096259;MC-0-1_GL0031289;MC-0-1_GL0038734	51397.4	57007.7	52679.7	49329.5	44318.4	49310.2	45885.7	51039	51097.5	NA	18686	23035.9	16089.6	NA	28893.1
1-1_GL0146495;1A-dyr4-07_GL0040112;2-1_GL0004454;2-1_GL0010197;2-2_GL0014660;2-5_GL0024453;20_GL0110156;3-8_GL0027844;MC-0-1_GL0031289	4935	4038.85	2863.27	3046.57	4539.44	2804.88	4591.95	5386.21	3533.83	NA	NA	NA	NA	NA	NA
1-1_GL0146495;1A-dyr4-07_GL0040112;2-1_GL0004454;2-1_GL0010197;2-5_GL0024453;20_GL0110156;3-8_GL0027844;4-1_GL0043965;S-Fe12_GL0027102	7997.45	7919.4	8980.21	16548.2	16608.3	15577.3	14942.4	14705.3	15105.4	15437.8	13515	15041.4	15514.5	13862.2	16754.3
1-1_GL0146495;1A-dyr4-07_GL0040112;2-1_GL0004454;2-2_GL0014660;2-5_GL0024453;20_GL0110156;7-8_GL0035972;MC-0-1_GL0031289	4285.86	NA	NA	1649.07	3374.42	2329.85	NA	1955.41	NA	1071.42	NA	NA	NA	NA	NA
1-1_GL0146495;2-1_GL0004454;2-1_GL0010197;2-2_GL0014660;2-5_GL0024453;3-8_GL0027844;4-1_GL0005092;4-1_GL0043965;6-4_GL0042689;7-1_GL0041687;7-8_GL0035972;7_GL0096259;MC-0-1_GL0031289;MC-0-1_GL0038734;S-Fe12_GL0027102	12555.8	14353.8	12375	11899.9	12230.8	10901.7	10043.9	11208.9	11332.6	5627.45	5575.25	3065.62	2993.84	3263.34	4858.24
1-1_GL0146495;2-1_GL0004454;2-1_GL0010197;2-2_GL0014660;2-5_GL0024453;3-8_GL0027844;4-1_GL0005092;6-4_GL0042689;7-1_GL0041687;7-8_GL0035972;7_GL0096259;MC-0-1_GL0031289;MC-0-1_GL0038734;S-Fe12_GL0027102	84309.2	99535	95750.7	63143.5	79214.5	86328.3	NA	64378.4	71088.7	NA	NA	NA	NA	NA	NA
1-1_GL0146495;2-5_GL0024453;4-1_GL0043965;S-Fe12_GL0027102	35545.1	7399.88	8676.03	47971.1	50377.8	40975.5	41177.4	41922.9	45974.2	21912.5	26858.6	23317.8	16757.6	21148.5	16247.8
1-1_GL0146495;4-1_GL0005092;4-1_GL0043965;7-1_GL0041687;7_GL0096259;MC-0-1_GL0038734	NA	NA	NA	NA	NA	44937.3	NA	NA	NA	47157.2	49285.3	46348.6	40211.8	44587.9	39605.8
1-1_GL0146495;4-1_GL0043965;7_GL0096259;MC-0-1_GL0038734	NA	NA	NA	18332	21659.2	17258	20991	22437.2	20103.8	16914.8	16988.2	19291.6	16177.2	14136.1	15943
1-1_GL0146495;MC-0-1_GL0031289	11688.3	9181.68	10332.2	NA	NA	NA	NA	NA	NA	NA	NA	NA	NA	NA	NA
1-1_GL0146614	5743.25	5638.32	5514.11	7282.84	7377.89	7147.39	6571.76	7041.99	6220.48	8213.47	8097.04	11976.3	NA	8304.99	7825.41
1-1_GL0146614;1_GL0021401;8-1_GL0083080;8-5_GL0050759;G1-4A_GL0063738;S-Fe20_GL0132538;S-Fe6_GL0172899	5413.9	5720.45	6214.45	6641.14	5911.56	6862.58	6287.57	6188.96	4816.97	3787.37	5204.43	NA	4928.36	4717.7	4193.98
1-1_GL0146614;1-2_GL0045795;11_GL0065713;11_GL0158489;14_GL0134653;19_GL0049070;1A-dyr2-07_GL0049869;1A-dyr4-07_GL0023556;1A-dyr5-06_GL0045551;2-1_GL0009313;2-1_GL0052084;2-1_GL0052682;2-2_GL0067024;2-2_GL0089776;2-2_GL0145679;2-5_GL0003928;2-8_GL0060042;20_GL0048707;23_GL0123732;3-5_GL0119887;4-3_GL0015732;4-7_GL0031370;5-1_GL0077814;6-2_GL0027536;6-2_GL0059797;6-4_GL0013979;6-4_GL0029542;6-5_GL…	356106	369558	496429	512768	444927	367867	517340	487702	561232	503449	480181	520060	483218	485672	409580
1-1_GL0146614;14_GL0134653;1_GL0021401;4-3_GL0015732;8-1_GL0083080;G1-4A_GL0063738;Group2-4A_GL0123968;MH-6-3_GL0075476;S-Fe20_GL0132538;S-Fe20_GL0145210	10568.3	9433.09	9684.56	7192.75	6233.97	5889.89	6779.4	8020.41	6083.55	6487.11	4841.08	2024.86	3077.29	3489.86	2886.26
1-1_GL0146614;14_GL0134653;1A-dyr2-07_GL0049869;4-3_GL0015732;6-2_GL0059797;8-1_GL0083080;8-5_GL0050759;G1-4A_GL0063738;MH-6-3_GL0075476;S-Fe20_GL0032209;S-Fe20_GL0132538;S-Fe20_GL0145210	4279.27	4736.24	8638.77	6957.78	4189.88	6106.25	5525.55	4691.52	5199.11	NA	NA	4821.32	NA	NA	NA
1-1_GL0146614;14_GL0134653;4-3_GL0015732;5-7_GL0063732;7-7_GL0030347;MH-6-3_GL0075476;MH-6-5_GL0052674;MH-6-5_GL0077975;S-Fe20_GL0017193;S-Fe20_GL0032209;S-Fe20_GL0145210	55179.7	55638.9	46236.3	88632.2	88994.3	89763.4	95124.7	94805.4	100819	96475.3	93322.2	95496.2	91532	100716	91112.3
1-1_GL0146614;1-8_GL0016906;25_GL0015924;5-7_GL0063732;6-3_GL0116019;6-4_GL0107221;8-1_GL0083080;8-5_GL0050759;G1-4A_GL0063738;MH-6-5_GL0052674;S-Fe20_GL0132538	NA	NA	NA	22011.3	26237.4	21853.1	NA	37674.2	37968.4	NA	NA	NA	NA	NA	NA
1-1_GL0146614;4-7_GL0090713	7936.18	9237.69	11457.3	21038.5	20909.6	22844.2	NA	23440.8	NA	25930.2	21613.2	24471.6	22379.8	22761.9	NA
1-1_GL0146614;6-4_GL0107221	36184.9	NA	32962.8	NA	NA	NA	NA	NA	NA	NA	NA	NA	NA	NA	NA
1-1_GL0146646	7123.94	6489.39	6569.01	7833.63	8094.88	7434.24	8898.46	7734.88	7641.25	NA	10019.9	NA	11076.2	NA	8889.52
1-1_GL0146646;1-7_GL0129238	12240.2	11440.2	11610.2	9008.45	8926.03	8985.64	9951.77	10076.2	7407.98	8544.57	8734.94	8247.9	NA	NA	NA
1-1_GL0146668	2618.46	2517.18	2273.6	3084.12	3201.64	2987.1	3340.95	3110.53	3363.94	NA	5952.86	NA	4091.98	NA	4756.24
1-1_GL0146986;MH-6-2_GL0082875	2339	1519.76	2263.92	2783.92	2879.89	2977.38	2662.21	2524.23	2789.82	NA	3734.86	3413.18	NA	NA	NA
11_GL0147059	4280.72	6786.18	2600.95	8371.34	11504	13010.2	9476.55	9934.89	9142.07	8628.18	9894.98	7706.83	7950.2	NA	NA
1-1_GL0147319;16_GL0115747;1A-dyr2-07_GL0033920;4-1_GL0066002;G1-1A_GL0083452;MC-0-1_GL0060588;S-Fe10_GL0165140	7551.54	9455.64	6736.4	16626.2	18305.6	18087.6	21930.6	18947.1	21935.5	29239	29042.5	32130.3	44277.8	NA	43784.1
1-1_GL0147539	64901.4	64514.4	72692.3	68089.9	68430.5	70756.6	68375.3	63439.8	65028.3	60555.2	65644.8	62898.2	63455.8	53502.8	56800.7
1-1_GL0147731	21315.9	20624.8	19962.4	20912.3	19672.6	20705.9	19457.1	21010.8	20230.1	19715.4	16701.8	18383.5	18290.1	19786	18516.4
1-1_GL0148132	9246.91	8685.34	8886.32	13011	14350.2	13520.3	15008.4	12357.6	12610.2	15702.5	13128.5	14014.5	14361.6	11830.2	16503.5
1-1_GL0148183;11_GL0093118;2-3_GL0088583;20_GL0087986;7-2_GL0092127;G1-1A_GL0081041;S-Fe12_GL0076409	7730.19	7099.07	6995.32	9811.96	9238.83	8080.34	9540.45	10456.9	10429	7643.22	7236.94	4996.7	8130.76	7861.38	7364.84
1-1_GL0148183;6-4_GL0035312	37301.3	32804.1	37807	NA	NA	NA	NA	NA	52237.3	NA	NA	NA	NA	NA	NA
1-1_GL0148183;7-2_GL0092127	8148.27	7484.52	7484.71	8528	7684.72	8837.28	NA	NA	NA	NA	7798.75	NA	NA	NA	NA
[truncated: 8,282 more rows]

## Sheet: DDA-MQ-Protein
Microbiota																		Host
[truncated: 4,768 more rows]

## Sheet: DIA-NN-libE-Peptide
Microbiota																		Host
[truncated: 44,259 more rows]

[truncated: 1 more sheets: DDA-MQ-Peptide]
