# Supplementary material for: Increasing taxonomic and functional characterization of host-microbiome interactions by DIA-PASEF metaproteomics
Source: Front Microbiol. 2023 Oct 16;14:1258703. doi: 10.3389/fmicb.2023.1258703 (PMC10613666; doi:10.3389/fmicb.2023.1258703)
Supplement: Supplementary file 10 [file Table_3.XLSX]

## Sheet: Taxa_DIA-NN-libE
Sequence	Intensity	LCA	Rank	Superkingdom	Kingdom	Phylum	Class	Order	Family	Genus	Species
AAAAAIEAMK	18717	Firmicutes bacterium ASF500	Species	Bacteria		Firmicutes					Firmicutes bacterium ASF500
AAAAGVVVDYK	3702.81	Anaerotruncus sp. G3(2012)	Species	Bacteria		Firmicutes	Clostridia	Clostridiales	Ruminococcaceae	Anaerotruncus	Anaerotruncus sp. G3(2012)
AAADLGESVSDINSSSR	1192.85	Lactobacillus	Genus	Bacteria		Firmicutes	Bacilli	Lactobacillales	Lactobacillaceae	Lactobacillus
AAADQNSEQLGSVAK	806.048	Lachnospiraceae bacterium A4	Species	Bacteria		Firmicutes	Clostridia	Clostridiales	Lachnospiraceae		Lachnospiraceae bacterium A4
AAADYFGMPLYR	22394.9	Alistipes	Genus	Bacteria		Bacteroidetes	Bacteroidia	Bacteroidales	Rikenellaceae	Alistipes
AAADYLDLPLYK	64096.9	Bacteroidales	Order	Bacteria		Bacteroidetes	Bacteroidia	Bacteroidales
AAADYLGLPLYK	6809.07	Sphaerochaeta globosa	Species	Bacteria		Spirochaetes	Spirochaetia	Spirochaetales	Spirochaetaceae	Sphaerochaeta	Sphaerochaeta globosa
AAAESLGTSLYNYIGGVNAK	3595.22	Ruminococcaceae	Family	Bacteria		Firmicutes	Clostridia	Clostridiales	Ruminococcaceae
AAAEVNQEYGLDPK	3657.72	Muridae	Family	Eukaryota	Metazoa	Chordata	Mammalia	Rodentia	Muridae
AAAINIVPNSTGAAK	49075.3	Bacteria	Superkingdom	Bacteria
AAALQPGEVLLLENLR	1940.49	Bacteria	Superkingdom	Bacteria
AAAMAANLQR	5853.49	Firmicutes	Phylum	Bacteria		Firmicutes
AAAMTFVK	5023.36	Acidaminococcus	Genus	Bacteria		Firmicutes	Negativicutes	Acidaminococcales	Acidaminococcaceae	Acidaminococcus
AAANESFGYNEDEIVSSDIVGMK	6608.27	Clostridiales	Order	Bacteria		Firmicutes	Clostridia	Clostridiales
AAANESFGYNEDEIVSSDIVGMR	12812.2	Clostridiales	Order	Bacteria		Firmicutes	Clostridia	Clostridiales
AAANESFGYNEDEIVSSDVIGMR	5594.47	Lachnospiraceae bacterium A4	Species	Bacteria		Firmicutes	Clostridia	Clostridiales	Lachnospiraceae		Lachnospiraceae bacterium A4
AAANYLDMPLYR	12916.1	Tannerella forsythia	Species	Bacteria		Bacteroidetes	Bacteroidia	Bacteroidales	Tannerellaceae	Tannerella	Tannerella forsythia
AAAPMIPFMTEDIYR	7272.49	Firmicutes	Phylum	Bacteria		Firmicutes
AAAQAALLAATTEIDK	4292.87	Clostridiales	Order	Bacteria		Firmicutes	Clostridia	Clostridiales
AAAQNTIPHSTGAAK	11236.6	Lactobacillaceae	Family	Bacteria		Firmicutes	Bacilli	Lactobacillales	Lactobacillaceae
AAASAALLAATSTIDK	9074.36	Lachnospiraceae bacterium 28-4	Species	Bacteria		Firmicutes	Clostridia	Clostridiales	Lachnospiraceae		Lachnospiraceae bacterium 28-4
AAASESFGYNEDPIVSSDVIGMK	471.48	Ruminococcus	Genus	Bacteria		Firmicutes	Clostridia	Clostridiales	Ruminococcaceae	Ruminococcus
AAASESYGYNEDPIVSSDVIGMK	1393.05	Enterocloster asparagiformis	Species	Bacteria		Firmicutes	Clostridia	Clostridiales	Lachnospiraceae	Enterocloster	Enterocloster asparagiformis
AAATESFGYNTDEIVSSDIVGMR	456.768	Firmicutes	Phylum	Bacteria		Firmicutes
AAATTVQEYLK	32968.8	Mammalia	Class	Eukaryota	Metazoa	Chordata	Mammalia
AAAVNIVPNSTGAAK	971498	Bacteria	Superkingdom	Bacteria
AAAVSMIPTSTGAAK	46731.2	Bacteria	Superkingdom	Bacteria
AADAEAEVASLNR	2617.49	Chordata	Phylum	Eukaryota	Metazoa	Chordata
AADAFGLAFAQK	2663.6	Clostridiales	Order	Bacteria		Firmicutes	Clostridia	Clostridiales
AADAVEDLR	6220.42	Chordata	Phylum	Eukaryota	Metazoa	Chordata
AADDAAGLAISEK	633644	Bacteria	Superkingdom	Bacteria
AADDAAGLAISEKMR	1652.8	Bacteria	Superkingdom	Bacteria
AADDAAGLSISEK	790260	Bacteria	Superkingdom	Bacteria
AADDAAGLTISEK	58608.8	Bacteria	Superkingdom	Bacteria
AADFAEIVK	3503.02	Anaerotruncus sp. G3(2012)	Species	Bacteria		Firmicutes	Clostridia	Clostridiales	Ruminococcaceae	Anaerotruncus	Anaerotruncus sp. G3(2012)
AADFVVENAVEK	3144.28	Lachnospiraceae bacterium MD335	Species	Bacteria		Firmicutes	Clostridia	Clostridiales	Lachnospiraceae		Lachnospiraceae bacterium MD335
AADILGNTK	5118.23	Lachnospiraceae bacterium 3-1	Species	Bacteria		Firmicutes	Clostridia	Clostridiales	Lachnospiraceae		Lachnospiraceae bacterium 3-1
AADLLPIDWDK	9952.73	Bacteroidia	Class	Bacteria		Bacteroidetes	Bacteroidia
AADLSGDFAK	7865.33	Alistipes sp. CHKCI003	Species	Bacteria		Bacteroidetes	Bacteroidia	Bacteroidales	Rikenellaceae	Alistipes	Alistipes sp. CHKCI003
AADNAAGLAISEK	437941	Bacteria	Superkingdom	Bacteria
AADNNLTAPMYLR	2211.94	Alistipes	Genus	Bacteria		Bacteroidetes	Bacteroidia	Bacteroidales	Rikenellaceae	Alistipes
AADNPTVMLTVENNAQYNK	463.72	Lachnospiraceae bacterium MD335	Species	Bacteria		Firmicutes	Clostridia	Clostridiales	Lachnospiraceae		Lachnospiraceae bacterium MD335
AADTHLIDYEK	881.542	Rodentia	Order	Eukaryota	Metazoa	Chordata	Mammalia	Rodentia
AAEADYQENVNK	8110.17	Lachnospiraceae bacterium A2	Species	Bacteria		Firmicutes	Clostridia	Clostridiales	Lachnospiraceae		Lachnospiraceae bacterium A2
AAEADYQENVNKDFK	5873.95	Lachnospiraceae bacterium A2	Species	Bacteria		Firmicutes	Clostridia	Clostridiales	Lachnospiraceae		Lachnospiraceae bacterium A2
AAEAEVQAEAKPAPK	2364.89	Lachnospiraceae bacterium MD335	Species	Bacteria		Firmicutes	Clostridia	Clostridiales	Lachnospiraceae		Lachnospiraceae bacterium MD335
AAEAFSELSK	4621.81	Chordata	Phylum	Eukaryota	Metazoa	Chordata
AAEALDAAKK	108505	Rodentia	Order	Eukaryota	Metazoa	Chordata	Mammalia	Rodentia
AAEDVIVK	10087.6	Lachnospiraceae bacterium MD335	Species	Bacteria		Firmicutes	Clostridia	Clostridiales	Lachnospiraceae		Lachnospiraceae bacterium MD335
AAEESLVLLK	814.648	Bacteria	Superkingdom	Bacteria
AAEILGNR	13815.4	Celeribacter baekdonensis	Species	Bacteria		Proteobacteria	Alphaproteobacteria	Rhodobacterales	Rhodobacteraceae	Celeribacter	Celeribacter baekdonensis
AAEIPDAIR	6102.24	Firmicutes	Phylum	Bacteria		Firmicutes
AAEIPEAIR	83348.2	Bacteria	Superkingdom	Bacteria
AAEIPEAIRK	11353.4	Bacteria	Superkingdom	Bacteria
AAELGVELK	6241.18	Bacteria	Superkingdom	Bacteria
AAELGYIDEIIEPSVTRPK	1493.08	Mucispirillum schaedleri	Species	Bacteria		Deferribacteres	Deferribacteres	Deferribacterales	Deferribacteraceae	Mucispirillum	Mucispirillum schaedleri
AAEPFFK	15398.7	Bacteria	Superkingdom	Bacteria
AAEQAASDLR	3765.53	Mammalia	Class	Eukaryota	Metazoa	Chordata	Mammalia
AAEVAEAIR	10399.8	Caulobacter sp. Root1455	Species	Bacteria		Proteobacteria	Alphaproteobacteria	Caulobacterales	Caulobacteraceae	Caulobacter	Caulobacter sp. Root1455
AAEVPDAIRK	11441.3	Bacteria	Superkingdom	Bacteria
AAEVPEAIR	54752.5	Bacteria	Superkingdom	Bacteria
AAEVPEAIRK	53712	Bacteria	Superkingdom	Bacteria
AAEVQDPATGR	3352.24	Lachnospiraceae bacterium MD335	Species	Bacteria		Firmicutes	Clostridia	Clostridiales	Lachnospiraceae		Lachnospiraceae bacterium MD335
AAEYAALQTSATGAAR	13954.3	Lachnospiraceae	Family	Bacteria		Firmicutes	Clostridia	Clostridiales	Lachnospiraceae
AAFEAGVR	14716.4	Bacteria	Superkingdom	Bacteria
AAFEAGWR	7503.61	Collinsella	Genus	Bacteria		Actinobacteria	Coriobacteriia	Coriobacteriales	Coriobacteriaceae	Collinsella
AAFLSEQLQPLSR	2517.4	Mus musculus	Species	Eukaryota	Metazoa	Chordata	Mammalia	Rodentia	Muridae	Mus	Mus musculus
AAFQLGSPWR	11372.2	Chordata	Phylum	Eukaryota	Metazoa	Chordata
AAFSLDSK	2026.47	Clostridiales	Order	Bacteria		Firmicutes	Clostridia	Clostridiales
AAFSLDSKEPTGDYK	2697.51	Lachnospiraceae bacterium A2	Species	Bacteria		Firmicutes	Clostridia	Clostridiales	Lachnospiraceae		Lachnospiraceae bacterium A2
AAFTMFSR	1518.26	Rodentia	Order	Eukaryota	Metazoa	Chordata	Mammalia	Rodentia
AAFVDNWAAEK	16037.7	Firmicutes	Phylum	Bacteria		Firmicutes
AAGADQAVLTLK	1147.05	Lachnospiraceae bacterium M18-1	Species	Bacteria		Firmicutes	Clostridia	Clostridiales	Lachnospiraceae		Lachnospiraceae bacterium M18-1
AAGADYVGEMDLVEK	6095.03	Firmicutes	Phylum	Bacteria		Firmicutes
AAGADYVGLDEYIEK	19220.4	Bacteroidetes	Phylum	Bacteria		Bacteroidetes
AAGDYEGLQLLPK	18676.9	Bacteroides	Genus	Bacteria		Bacteroidetes	Bacteroidia	Bacteroidales	Bacteroidaceae	Bacteroides
AAGFENLK	3479.84	Bacteria	Superkingdom	Bacteria
AAGGNIIPSSTGAAK	14276.5	Bacteria	Superkingdom	Bacteria
AAGGVLDADTK	7063.67	Lactobacillaceae	Family	Bacteria		Firmicutes	Bacilli	Lactobacillales	Lactobacillaceae
AAGGYELEGK	10239.8	Lachnospiraceae	Family	Bacteria		Firmicutes	Clostridia	Clostridiales	Lachnospiraceae
AAGIPVIAYDR	30096.5	Actinobacteria	Class	Bacteria		Actinobacteria	Actinobacteria
AAGLDVYADEPATNK	5601.6	Firmicutes	Phylum	Bacteria		Firmicutes
AAGLIPWK	1546.62	Pseudoramibacter alactolyticus	Species	Bacteria		Firmicutes	Clostridia	Clostridiales	Eubacteriaceae	Pseudoramibacter	Pseudoramibacter alactolyticus
AAGSGELGVTVK	14502.3	Mammalia	Class	Eukaryota	Metazoa	Chordata	Mammalia
AAGTFTTNVVK	4717.81	Clostridiales	Order	Bacteria		Firmicutes	Clostridia	Clostridiales
AAGTVAEAYK	20751.6	Lachnospiraceae bacterium A4	Species	Bacteria		Firmicutes	Clostridia	Clostridiales	Lachnospiraceae		Lachnospiraceae bacterium A4
AAGVAAQLMAK	5547.09	Firmicutes	Phylum	Bacteria		Firmicutes
AAGVSVQNVSGTFGTAPK	1351.96	Bacteroidetes	Phylum	Bacteria		Bacteroidetes
AAGWSEIK	5513.38	Blastopirellula marina	Species	Bacteria		Planctomycetes	Planctomycetia	Pirellulales	Pirellulaceae	Blastopirellula	Blastopirellula marina
AAGYDNLK	15859.5	Firmicutes	Phylum	Bacteria		Firmicutes
AAGYTGEYITDKDR	4398.84	Clostridiales	Order	Bacteria		Firmicutes	Clostridia	Clostridiales
AAIAEGIVPGGGVAYIR	27733.8	Bacteria	Superkingdom	Bacteria
AAIDFITSEEVLK	3501.63	Clostridiales	Order	Bacteria		Firmicutes	Clostridia	Clostridiales
AAIDTVNTAIDSISSMR	2383.9	Lachnospiraceae bacterium M18-1	Species	Bacteria		Firmicutes	Clostridia	Clostridiales	Lachnospiraceae		Lachnospiraceae bacterium M18-1
AAIEAGISVYNR	7000.86	Firmicutes	Phylum	Bacteria		Firmicutes
AAIEEGIVPGGGVAYIR	6147.57	Bacteria	Superkingdom	Bacteria
AAIEFVR	3446.11	Actinobacteria	Class	Bacteria		Actinobacteria	Actinobacteria
AAIEMEGPVYLR	5443.1	Ruminococcus	Genus	Bacteria		Firmicutes	Clostridia	Clostridiales	Ruminococcaceae	Ruminococcus
AAIGDTLVQDIR	4121.42	Rodentia	Order	Eukaryota	Metazoa	Chordata	Mammalia	Rodentia
AAIGYDDADTIAK	4285.31	Lachnospiraceae bacterium MD335	Species	Bacteria		Firmicutes	Clostridia	Clostridiales	Lachnospiraceae		Lachnospiraceae bacterium MD335
AAIISAEGDSK	8767.61	Metazoa	Kingdom	Eukaryota	Metazoa
AAINNGYDMDIK	35929.6	Clostridiales	Order	Bacteria		Firmicutes	Clostridia	Clostridiales
AAINSVSSTR	22566.7	Anaerotignum neopropionicum	Species	Bacteria		Firmicutes	Clostridia	Clostridiales	Lachnospiraceae	Anaerotignum	Anaerotignum neopropionicum
AAINYVSTTR	38715.9	Lachnospiraceae bacterium MD308	Species	Bacteria		Firmicutes	Clostridia	Clostridiales	Lachnospiraceae		Lachnospiraceae bacterium MD308
AAISDSVVEPAAK	31308.8	Muridae	Family	Eukaryota	Metazoa	Chordata	Mammalia	Rodentia	Muridae
AAIVEVNSETDFVAK	4939.77	Clostridiales	Order	Bacteria		Firmicutes	Clostridia	Clostridiales
AALATSSFLSAASFQETTK	1636.44	Lachnospiraceae	Family	Bacteria		Firmicutes	Clostridia	Clostridiales	Lachnospiraceae
AALDGLTAEQVSK	12435.1	Lactobacillus	Genus	Bacteria		Firmicutes	Bacilli	Lactobacillales	Lactobacillaceae	Lactobacillus
AALDGTVFR	10259	Bacteria	Superkingdom	Bacteria
AALDSALDAAGIK	33174	Lachnospiraceae bacterium A4	Species	Bacteria		Firmicutes	Clostridia	Clostridiales	Lachnospiraceae		Lachnospiraceae bacterium A4
AALEAGVDK	90988.7	Firmicutes	Phylum	Bacteria		Firmicutes
AALEGTLAETEAR	56266.5	Chordata	Phylum	Eukaryota	Metazoa	Chordata
AALENDFAENDAMQYAAVR	899.202	Lachnospiraceae bacterium M18-1	Species	Bacteria		Firmicutes	Clostridia	Clostridiales	Lachnospiraceae		Lachnospiraceae bacterium M18-1
AALESGVNQLADTVR	56222.9	Lachnospiraceae	Family	Bacteria		Firmicutes	Clostridia	Clostridiales	Lachnospiraceae
AALESGVNQLANTVR	14986.5	Lachnospiraceae bacterium 2_1_46FAA	Species	Bacteria		Firmicutes	Clostridia	Clostridiales	Lachnospiraceae		Lachnospiraceae bacterium 2_1_46FAA
AALETGVNK	15832.2	Clostridiales	Order	Bacteria		Firmicutes	Clostridia	Clostridiales
AALEYAVAASALK	10298.6	Bacteria	Superkingdom	Bacteria
AALEYGVAASALK	14849.9	Lachnospiraceae bacterium MD335	Species	Bacteria		Firmicutes	Clostridia	Clostridiales	Lachnospiraceae		Lachnospiraceae bacterium MD335
AALIFGNVTPGDAANLMK	7360.71	Blautia	Genus	Bacteria		Firmicutes	Clostridia	Clostridiales	Lachnospiraceae	Blautia
AALLITDIEMPEMDGHR	1419.02	Dorea	Genus	Bacteria		Firmicutes	Clostridia	Clostridiales	Lachnospiraceae	Dorea
AALNVQAR	6758.14	Oscillibacter sp. 1-3	Species	Bacteria		Firmicutes	Clostridia	Clostridiales	Oscillospiraceae	Oscillibacter	Oscillibacter sp. 1-3
AALVGNYEGTASR	8365.24	Firmicutes	Phylum	Bacteria		Firmicutes
AALWAATR	8015.51	Bacteria	Superkingdom	Bacteria
AAMELPQDAIVNLGTGAPEK	1118.72	Bacteria	Superkingdom	Bacteria
AAMLAIMNPDDK	29751.2	Firmicutes	Phylum	Bacteria		Firmicutes
AAMLTIMNPDDK	46432.8	Firmicutes	Phylum	Bacteria		Firmicutes
AAMMTIMNPDDK	5831.32	Shuttleworthia	Genus	Bacteria		Firmicutes	Clostridia	Clostridiales	Lachnospiraceae	Shuttleworthia
AAMNLMGWDVGSLR	2075.72	Lachnospiraceae bacterium A2	Species	Bacteria		Firmicutes	Clostridia	Clostridiales	Lachnospiraceae		Lachnospiraceae bacterium A2
AAMPEANPVLLEPVGELK	1695.03	Firmicutes	Phylum	Bacteria		Firmicutes
AAMTVSISDMTVPAEK	1133.29	Clostridiales	Order	Bacteria		Firmicutes	Clostridia	Clostridiales
AANAGGVATSALEMTQNSER	4659.07	Firmicutes	Phylum	Bacteria		Firmicutes
AANAGGVATSGLEMSQNSER	653.905	Bacteria	Superkingdom	Bacteria
AANAGGVSVSGLEMAQNSQK	1273.95	Prevotella	Genus	Bacteria		Bacteroidetes	Bacteroidia	Bacteroidales	Prevotellaceae	Prevotella
AANEAGYFNEEMAPIEVK	934.774	Muridae	Family	Eukaryota	Metazoa	Chordata	Mammalia	Rodentia	Muridae
AANEANPIPESDEPFFNYISGER	1198.21	Lachnospiraceae bacterium A4	Species	Bacteria		Firmicutes	Clostridia	Clostridiales	Lachnospiraceae		Lachnospiraceae bacterium A4
AANGVILVTTK	2451.89	Bacteria	Superkingdom	Bacteria
AANGVVLATEK	2846.43	Eukaryota	Superkingdom	Eukaryota
AANIVEAVK	8614.32	Oscillibacter sp. 1-3	Species	Bacteria		Firmicutes	Clostridia	Clostridiales	Oscillospiraceae	Oscillibacter	Oscillibacter sp. 1-3
AANPDIIFAPSSITTAPLIIK	376.644	Clostridiales	Order	Bacteria		Firmicutes	Clostridia	Clostridiales
AANVTLVGTEK	23768.2	Firmicutes	Phylum	Bacteria		Firmicutes
AAPAFEEQSTETELLETGIK	813.683	Lachnospiraceae bacterium 28-4	Species	Bacteria		Firmicutes	Clostridia	Clostridiales	Lachnospiraceae		Lachnospiraceae bacterium 28-4
AAPELSQNKPLEVVDYDVK	546.74	Bacteroides	Genus	Bacteria		Bacteroidetes	Bacteroidia	Bacteroidales	Bacteroidaceae	Bacteroides
AAPFTLEYR	7726.77	Mammalia	Class	Eukaryota	Metazoa	Chordata	Mammalia
AAPGLTGFTK	9461.05	Clostridiales	Order	Bacteria		Firmicutes	Clostridia	Clostridiales
AAPVLLEPIMK	39292.1	Bacteria	Superkingdom	Bacteria
AAQEEYIK	2620.74	Metazoa	Kingdom	Eukaryota	Metazoa
AAQSPQQHSSGDPTEEESPV	234.303	Mus musculus	Species	Eukaryota	Metazoa	Chordata	Mammalia	Rodentia	Muridae	Mus	Mus musculus
AASATLPPITVTPVVNK	167070	Muridae	Family	Eukaryota	Metazoa	Chordata	Mammalia	Rodentia	Muridae
AASGFNATEDAQTLR	93502.9	Mammalia	Class	Eukaryota	Metazoa	Chordata	Mammalia
AASGFNATEDAQTLRK	34447.2	Mammalia	Class	Eukaryota	Metazoa	Chordata	Mammalia
AASGTKEDPNLVPSISNK	3206.26	Metazoa	Kingdom	Eukaryota	Metazoa
AASNESFGYNTDEIVSSDIVGMR	2569.11	Firmicutes	Phylum	Bacteria		Firmicutes
AASSASFGYNEDPIVSSDVIGMR	1480.99	Eubacterium	Genus	Bacteria		Firmicutes	Clostridia	Clostridiales	Eubacteriaceae	Eubacterium
AASSLVMDLSQGK	88278.5	Lachnospiraceae bacterium MD335	Species	Bacteria		Firmicutes	Clostridia	Clostridiales	Lachnospiraceae		Lachnospiraceae bacterium MD335
AASTQVFVSR	5750.94	Lactobacillus	Genus	Bacteria		Firmicutes	Bacilli	Lactobacillales	Lactobacillaceae	Lactobacillus
AASVDEINTFAK	46125.8	Lachnospiraceae bacterium 28-4	Species	Bacteria		Firmicutes	Clostridia	Clostridiales	Lachnospiraceae		Lachnospiraceae bacterium 28-4
AASVEEPTTGR	10574.7	Lachnospiraceae bacterium A4	Species	Bacteria		Firmicutes	Clostridia	Clostridiales	Lachnospiraceae		Lachnospiraceae bacterium A4
AATAAADFTAK	7307.6	Metazoa	Kingdom	Eukaryota	Metazoa
AATDAGVAVATWDSDAQPSDR	2971.92	Anaerotruncus sp. G3(2012)	Species	Bacteria		Firmicutes	Clostridia	Clostridiales	Ruminococcaceae	Anaerotruncus	Anaerotruncus sp. G3(2012)
AATDDKNFSSEFLGGQNPFK	7211.12	Lachnospiraceae bacterium MD335	Species	Bacteria		Firmicutes	Clostridia	Clostridiales	Lachnospiraceae		Lachnospiraceae bacterium MD335
AATQFWR	1573.99	Metazoa	Kingdom	Eukaryota	Metazoa
AATSLGGGQIEVK	11986.1	Lachnospiraceae bacterium MD335	Species	Bacteria		Firmicutes	Clostridia	Clostridiales	Lachnospiraceae		Lachnospiraceae bacterium MD335
AATVQNTMNPK	3339.43	Rodentia	Order	Eukaryota	Metazoa	Chordata	Mammalia	Rodentia
AAVAAATMR	45554.4	Bacteria	Superkingdom	Bacteria
AAVANIEEVYA	2262.87	Clostridiales	Order	Bacteria		Firmicutes	Clostridia	Clostridiales
AAVAVPNRPPDAVLR	2325.41	Mus musculus	Species	Eukaryota	Metazoa	Chordata	Mammalia	Rodentia	Muridae	Mus	Mus musculus
AAVDAIDK	6007.77	Streptomyces decoyicus	Species	Bacteria		Actinobacteria	Actinobacteria	Streptomycetales	Streptomycetaceae	Streptomyces	Streptomyces decoyicus
AAVEADLNALK	7967.73	Clostridiales	Order	Bacteria		Firmicutes	Clostridia	Clostridiales
AAVEEGIIAGGGSAYIHAAK	13078.1	Firmicutes	Phylum	Bacteria		Firmicutes
AAVEEGIVAGGGIAPLNATAAVEK	618.86	Anaerotruncus sp. G3(2012)	Species	Bacteria		Firmicutes	Clostridia	Clostridiales	Ruminococcaceae	Anaerotruncus	Anaerotruncus sp. G3(2012)
AAVEEGIVAGGGTALINAMPAVEK	536.656	Clostridiales	Order	Bacteria		Firmicutes	Clostridia	Clostridiales
AAVEEGIVPGGGTAFIR	57323.1	Bacteria	Superkingdom	Bacteria
AAVEEGIVPGGGVALVR	13501.3	Bacteria	Superkingdom	Bacteria
AAVEEGIVPGGGVAYIR	27462.7	Bacteria	Superkingdom	Bacteria
AAVEEGYVAGGGTALVDVMK	634.699	Lactobacillus	Genus	Bacteria		Firmicutes	Bacilli	Lactobacillales	Lactobacillaceae	Lactobacillus
AAVENAVAGK	15883.6	Butyricicoccus pullicaecorum	Species	Bacteria		Firmicutes	Clostridia	Clostridiales	Clostridiaceae	Butyricicoccus	Butyricicoccus pullicaecorum
AAVIMDYGSTYGSAPYSGGFYR	1037.5	Lachnospiraceae bacterium A2	Species	Bacteria		Firmicutes	Clostridia	Clostridiales	Lachnospiraceae		Lachnospiraceae bacterium A2
AAVPDAVGK	15500.8	Metazoa	Kingdom	Eukaryota	Metazoa
AAVPSGASTGAFEAVEMR	30870.2	Clostridiales	Order	Bacteria		Firmicutes	Clostridia	Clostridiales
AAVPSGASTGENEALELR	61541.4	Bacteria	Superkingdom	Bacteria
AAVPSGASTGENEALELRDGDK	4016.7	Bacteria	Superkingdom	Bacteria
AAVPVINDKPDYK	14720.8	Firmicutes	Phylum	Bacteria		Firmicutes
AAVPVINDRPDYK	17571.3	Lachnospiraceae bacterium MD335	Species	Bacteria		Firmicutes	Clostridia	Clostridiales	Lachnospiraceae		Lachnospiraceae bacterium MD335
AAVSLADTSDYAGNR	1986.88	Lachnospiraceae bacterium A4	Species	Bacteria		Firmicutes	Clostridia	Clostridiales	Lachnospiraceae		Lachnospiraceae bacterium A4
AAVWTDSR	92188.7	Chordata	Phylum	Eukaryota	Metazoa	Chordata
AAWEEAEHAAK	194449	Bacteria	Superkingdom	Bacteria
AAWEVDSGR	7981.52	Chordata	Phylum	Eukaryota	Metazoa	Chordata
AAWSPMGSTANISGR	5356.28	Clostridiales	Order	Bacteria		Firmicutes	Clostridia	Clostridiales
AAYEAELGDAR	4939.29	Chordata	Phylum	Eukaryota	Metazoa	Chordata
AAYEAELGDARK	3465.23	Chordata	Phylum	Eukaryota	Metazoa	Chordata
AAYEALSR	32886.9	Bacteria	Superkingdom	Bacteria
AAYENAIK	50592.5	Bacteria	Superkingdom	Bacteria
AAYFGIYDTAK	62087.3	Metazoa	Kingdom	Eukaryota	Metazoa
AAYFGVYDTAK	5036.1	Metazoa	Kingdom	Eukaryota	Metazoa
AAYIVTGQWAK	8635.76	Bacteria	Superkingdom	Bacteria
AAYLDTGTWASNAIK	2086.74	Bacteroidales	Order	Bacteria		Bacteroidetes	Bacteroidia	Bacteroidales
AAYTELTR	22714.8	Phaeobacter gallaeciensis	Species	Bacteria		Proteobacteria	Alphaproteobacteria	Rhodobacterales	Rhodobacteraceae	Phaeobacter	Phaeobacter gallaeciensis
AAYVQAIR	8126.79	Clostridiales	Order	Bacteria		Firmicutes	Clostridia	Clostridiales
ADADLVAEITK	4705.96	Lachnospiraceae bacterium M18-1	Species	Bacteria		Firmicutes	Clostridia	Clostridiales	Lachnospiraceae		Lachnospiraceae bacterium M18-1
ADADLVAEITKK	5200.45	Lachnospiraceae bacterium M18-1	Species	Bacteria		Firmicutes	Clostridia	Clostridiales	Lachnospiraceae		Lachnospiraceae bacterium M18-1
ADAENYLGEK	6287.94	Bacteria	Superkingdom	Bacteria
ADAESYLGEK	16244.6	Bacteria	Superkingdom	Bacteria
ADAGFEFMQK	17719.6	Bacteria	Superkingdom	Bacteria
ADAIMDDYNMGLITNNER	1084.02	Alistipes	Genus	Bacteria		Bacteroidetes	Bacteroidia	Bacteroidales	Rikenellaceae	Alistipes
ADALQYLDAEK	14971	Clostridiales	Order	Bacteria		Firmicutes	Clostridia	Clostridiales
ADAPAVYDALGNEISLATDVVAK	6345.04	Lachnospiraceae bacterium MD335	Species	Bacteria		Firmicutes	Clostridia	Clostridiales	Lachnospiraceae		Lachnospiraceae bacterium MD335
ADAPAVYDALGNEISLATVISTDKR	1450.37	Lachnospiraceae bacterium MD335	Species	Bacteria		Firmicutes	Clostridia	Clostridiales	Lachnospiraceae		Lachnospiraceae bacterium MD335
ADAPAVYDALGNEISLK	27685.5	Lachnospiraceae bacterium MD335	Species	Bacteria		Firmicutes	Clostridia	Clostridiales	Lachnospiraceae		Lachnospiraceae bacterium MD335
ADDALWLFPTVYK	32382.3	Bacteria	Superkingdom	Bacteria
ADDANTEGSDETEGSDEAEGGDTSDAADQTLK	234.874	Lachnospiraceae bacterium A2	Species	Bacteria		Firmicutes	Clostridia	Clostridiales	Lachnospiraceae		Lachnospiraceae bacterium A2
ADDLLNFR	5042.73	Pontibacter sp. BAB1700	Species	Bacteria		Bacteroidetes	Cytophagia	Cytophagales	Hymenobacteraceae	Pontibacter	Pontibacter sp. BAB1700
ADDYDLLVTTGK	9515.13	Hungatella hathewayi	Species	Bacteria		Firmicutes	Clostridia	Clostridiales	Clostridiaceae	Hungatella	Hungatella hathewayi
ADEAQAAGADFVGAEELIPK	916.089	Firmicutes	Phylum	Bacteria		Firmicutes
ADEAQAAGADYVGAEELIPK	1706.44	Clostridiales	Order	Bacteria		Firmicutes	Clostridia	Clostridiales
ADEIEDNIK	8478.02	Lactobacillus	Genus	Bacteria		Firmicutes	Bacilli	Lactobacillales	Lactobacillaceae	Lactobacillus
ADEWFQK	7834.75	Lachnospiraceae bacterium A4	Species	Bacteria		Firmicutes	Clostridia	Clostridiales	Lachnospiraceae		Lachnospiraceae bacterium A4
ADEWLMK	2121.5	Chordata	Phylum	Eukaryota	Metazoa	Chordata
ADFDMLDTFIADHAIR	1682.01	Clostridiales	Order	Bacteria		Firmicutes	Clostridia	Clostridiales
ADFDNTVAIHPTSSEELVTLR	1189.28	Chordata	Phylum	Eukaryota	Metazoa	Chordata
ADFGYNAR	7030.75	Bacteria	Superkingdom	Bacteria
ADFISNYWDADK	5054.93	Bacteroides	Genus	Bacteria		Bacteroidetes	Bacteroidia	Bacteroidales	Bacteroidaceae	Bacteroides
ADFISNYWDADKTYTK	2739.09	Bacteroides	Genus	Bacteria		Bacteroidetes	Bacteroidia	Bacteroidales	Bacteroidaceae	Bacteroides
ADFQGISPER	7853.69	Mammalia	Class	Eukaryota	Metazoa	Chordata	Mammalia
ADFSGMSSK	179826	Mammalia	Class	Eukaryota	Metazoa	Chordata	Mammalia
ADFTFYGGLYR	1483.28	Bacteria	Superkingdom	Bacteria
ADFTIIAAPGFK	2505.15	Leptotrichia buccalis	Species	Bacteria		Fusobacteria	Fusobacteriia	Fusobacteriales	Leptotrichiaceae	Leptotrichia	Leptotrichia buccalis
ADGFEWGFMAVPAVNAGEK	2014.56	Lachnospiraceae bacterium A2	Species	Bacteria		Firmicutes	Clostridia	Clostridiales	Lachnospiraceae		Lachnospiraceae bacterium A2
ADGIQVLYGNLAPDGALVK	3901.98	Hungatella hathewayi	Species	Bacteria		Firmicutes	Clostridia	Clostridiales	Clostridiaceae	Hungatella	Hungatella hathewayi
ADGLAILGVLMK	2971.31	Mus musculus	Species	Eukaryota	Metazoa	Chordata	Mammalia	Rodentia	Muridae	Mus	Mus musculus
ADGLYPVADDR	6360.61	Muridae	Family	Eukaryota	Metazoa	Chordata	Mammalia	Rodentia	Muridae
ADGQPMNVNVAISNNVNK	548.973	Lachnospiraceae bacterium MD335	Species	Bacteria		Firmicutes	Clostridia	Clostridiales	Lachnospiraceae		Lachnospiraceae bacterium MD335
ADGSTQVIDTK	18064.6	Mammalia	Class	Eukaryota	Metazoa	Chordata	Mammalia
ADGTAFTDEEK	1528.2	Lachnospiraceae bacterium MD335	Species	Bacteria		Firmicutes	Clostridia	Clostridiales	Lachnospiraceae		Lachnospiraceae bacterium MD335
ADGTAFTDEEKK	2237.67	Lachnospiraceae bacterium MD335	Species	Bacteria		Firmicutes	Clostridia	Clostridiales	Lachnospiraceae		Lachnospiraceae bacterium MD335
ADGVNVVEVSDVTPWQEAVK	3197.19	Lachnospiraceae bacterium MD335	Species	Bacteria		Firmicutes	Clostridia	Clostridiales	Lachnospiraceae		Lachnospiraceae bacterium MD335
ADIAESQVNK	9375.57	Metazoa	Kingdom	Eukaryota	Metazoa
ADIDIQQIVR	2796.33	Lachnospiraceae bacterium A2	Species	Bacteria		Firmicutes	Clostridia	Clostridiales	Lachnospiraceae		Lachnospiraceae bacterium A2
ADIDYALVEALTK	4583.6	Bacteroidales	Order	Bacteria		Bacteroidetes	Bacteroidia	Bacteroidales
ADIDYGFAEADTTYGK	229227	Bacteria	Superkingdom	Bacteria
ADIDYGFAEANTTYGK	12072	Firmicutes	Phylum	Bacteria		Firmicutes
ADIDYGVAR	7896.53	Bacteria	Superkingdom	Bacteria
ADIEMPFDPSK	4567.04	Mammalia	Class	Eukaryota	Metazoa	Chordata	Mammalia
ADIEQALSLPQDAPVAAPETK	1865.08	Lactobacillus murinus	Species	Bacteria		Firmicutes	Bacilli	Lactobacillales	Lactobacillaceae	Lactobacillus	Lactobacillus murinus
ADIEYGFAEADTTYGK	4969.49	Firmicutes	Phylum	Bacteria		Firmicutes
ADIFAAGDK	30975.5	Bacteria	Superkingdom	Bacteria
ADIFAAGDKIDASAISK	12170.8	Clostridiales	Order	Bacteria		Firmicutes	Clostridia	Clostridiales
ADIFAAGDKVDATAISK	2946.44	Clostridiales	Order	Bacteria		Firmicutes	Clostridia	Clostridiales
ADIFAAGDR	3559.9	Firmicutes	Phylum	Bacteria		Firmicutes
ADIFAAGDRVDATAISK	2898.04	Lachnospiraceae bacterium M18-1	Species	Bacteria		Firmicutes	Clostridia	Clostridiales	Lachnospiraceae		Lachnospiraceae bacterium M18-1
ADIFAEGDKIDATAISK	8176.37	Clostridiales	Order	Bacteria		Firmicutes	Clostridia	Clostridiales
ADIFEAGDK	5846.23	Firmicutes	Phylum	Bacteria		Firmicutes
ADIFEAGDKIDVTAK	1180.7	Clostridium	Genus	Bacteria		Firmicutes	Clostridia	Clostridiales	Clostridiaceae	Clostridium
ADIGAAGMTVTEDR	4378.16	Clostridiales	Order	Bacteria		Firmicutes	Clostridia	Clostridiales
ADIGAAGMTVTEDRK	224.679	Clostridium sp. MD294	Species	Bacteria		Firmicutes	Clostridia	Clostridiales	Clostridiaceae	Clostridium	Clostridium sp. MD294
ADIGVAGMTVTEDR	3079.7	Lachnospiraceae bacterium MD308	Species	Bacteria		Firmicutes	Clostridia	Clostridiales	Lachnospiraceae		Lachnospiraceae bacterium MD308
ADIGVAMGIVGSDVSK	2331.29	Rodentia	Order	Eukaryota	Metazoa	Chordata	Mammalia	Rodentia
ADILAMVK	2366.88	Bacteria	Superkingdom	Bacteria
ADILYAINSSVVTK	1881.81	Alistipes sp. CHKCI003	Species	Bacteria		Bacteroidetes	Bacteroidia	Bacteroidales	Rikenellaceae	Alistipes	Alistipes sp. CHKCI003
ADINTIR	50031.9	Bacteria	Superkingdom	Bacteria
ADITVITK	17643.4	Lachnospiraceae bacterium A2	Species	Bacteria		Firmicutes	Clostridia	Clostridiales	Lachnospiraceae		Lachnospiraceae bacterium A2
ADITVITKK	3999.25	Lachnospiraceae bacterium A2	Species	Bacteria		Firmicutes	Clostridia	Clostridiales	Lachnospiraceae		Lachnospiraceae bacterium A2
ADIVENQVMDTR	8728.53	Rodentia	Order	Eukaryota	Metazoa	Chordata	Mammalia	Rodentia
ADIWLIR	7025.24	Chordata	Phylum	Eukaryota	Metazoa	Chordata
ADIYYDDLGK	7581.23	Firmicutes	Phylum	Bacteria		Firmicutes
ADKGAVNPDVVGK	1035.08	Anaerotruncus sp. G3(2012)	Species	Bacteria		Firmicutes	Clostridia	Clostridiales	Ruminococcaceae	Anaerotruncus	Anaerotruncus sp. G3(2012)
ADLEGAALQK	12539.9	Lachnospiraceae bacterium MD335	Species	Bacteria		Firmicutes	Clostridia	Clostridiales	Lachnospiraceae		Lachnospiraceae bacterium MD335
ADLFEAGDIVDVTGTSK	1328.51	Lactobacillus	Genus	Bacteria		Firmicutes	Bacilli	Lactobacillales	Lactobacillaceae	Lactobacillus
ADLGNENLEALEK	5661.18	Oxobacter pfennigii	Species	Bacteria		Firmicutes	Clostridia	Clostridiales	Clostridiaceae	Oxobacter	Oxobacter pfennigii
ADLINNLGTIAK	8683.07	Eukaryota	Superkingdom	Eukaryota
ADLKDVDDSDLGLK	9178.02	Clostridiales	Order	Bacteria		Firmicutes	Clostridia	Clostridiales
ADLKDVDDSNLGLAGSPTK	893.511	Clostridium	Genus	Bacteria		Firmicutes	Clostridia	Clostridiales	Clostridiaceae	Clostridium
ADLKDVDDSNLGLK	6855.25	Firmicutes	Phylum	Bacteria		Firmicutes
ADLKDVEDSNLGLK	35891.8	Firmicutes	Phylum	Bacteria		Firmicutes
ADLNNENLDALEK	11180.5	Bacteria	Superkingdom	Bacteria
ADLNNENLEALEK	9956.58	Bacteria	Superkingdom	Bacteria
ADLSGMSGSR	121560	Rodentia	Order	Eukaryota	Metazoa	Chordata	Mammalia	Rodentia
ADLTGISK	5136.98	Metazoa	Kingdom	Eukaryota	Metazoa
ADLTVNLGR	5547.95	Lachnospiraceae bacterium 28-4	Species	Bacteria		Firmicutes	Clostridia	Clostridiales	Lachnospiraceae		Lachnospiraceae bacterium 28-4
ADMPFLMPVEDVFTISGR	624.604	Firmicutes	Phylum	Bacteria		Firmicutes
ADMPVAVETVK	18775.3	Anaerotruncus sp. G3(2012)	Species	Bacteria		Firmicutes	Clostridia	Clostridiales	Ruminococcaceae	Anaerotruncus	Anaerotruncus sp. G3(2012)
ADMQDNTVK	7912.39	Bacteria	Superkingdom	Bacteria
ADNFEYSDPVDGSISK	1079.16	Muridae	Family	Eukaryota	Metazoa	Chordata	Mammalia	Rodentia	Muridae
ADNLIPGTR	9354.53	Metazoa	Kingdom	Eukaryota	Metazoa
ADNSATGFGTGTR	217683	Mus musculus	Species	Eukaryota	Metazoa	Chordata	Mammalia	Rodentia	Muridae	Mus	Mus musculus
ADPGIPPPPR	2966.49	Mammalia	Class	Eukaryota	Metazoa	Chordata	Mammalia
ADPMSIVR	4994.01	Alistipes	Genus	Bacteria		Bacteroidetes	Bacteroidia	Bacteroidales	Rikenellaceae	Alistipes
ADPPYTHTIQK	3214	Mammalia	Class	Eukaryota	Metazoa	Chordata	Mammalia
ADPSLNPEQLK	2687.5	Mammalia	Class	Eukaryota	Metazoa	Chordata	Mammalia
ADPSLNPEQLKK	1330.6	Mammalia	Class	Eukaryota	Metazoa	Chordata	Mammalia
ADPSQPPSELGYTWNIPVR	26306.9	Mus musculus	Species	Eukaryota	Metazoa	Chordata	Mammalia	Rodentia	Muridae	Mus	Mus musculus
ADPYANYAEMRPGTASR	5759.48	Lachnospiraceae bacterium A4	Species	Bacteria		Firmicutes	Clostridia	Clostridiales	Lachnospiraceae		Lachnospiraceae bacterium A4
ADQEDMAQYSVTQAIVEAR	28181.1	Mus musculus	Species	Eukaryota	Metazoa	Chordata	Mammalia	Rodentia	Muridae	Mus	Mus musculus
ADQPALDFGK	23960.4	Lachnospiraceae	Family	Bacteria		Firmicutes	Clostridia	Clostridiales	Lachnospiraceae
ADQPFLMPVEDVFTISGR	889.733	Firmicutes	Phylum	Bacteria		Firmicutes
ADQQAGAASLR	35285.5	Lachnospiraceae bacterium A4	Species	Bacteria		Firmicutes	Clostridia	Clostridiales	Lachnospiraceae		Lachnospiraceae bacterium A4
ADQVDTQQLMR	3107.51	Eukaryota	Superkingdom	Eukaryota
ADSGIDLAALK	9093.01	Firmicutes	Phylum	Bacteria		Firmicutes
ADSGIELSALK	28510.3	Clostridiales	Order	Bacteria		Firmicutes	Clostridia	Clostridiales
ADSLADEINFLR	1617.85	Chordata	Phylum	Eukaryota	Metazoa	Chordata
ADSLQDEINFLK	1896.85	Muridae	Family	Eukaryota	Metazoa	Chordata	Mammalia	Rodentia	Muridae
ADSQLAEMGGTESTGK	899.45	Lachnospiraceae bacterium A2	Species	Bacteria		Firmicutes	Clostridia	Clostridiales	Lachnospiraceae		Lachnospiraceae bacterium A2
ADSTFSTTIR	80181.6	Lachnospiraceae bacterium MD335	Species	Bacteria		Firmicutes	Clostridia	Clostridiales	Lachnospiraceae		Lachnospiraceae bacterium MD335
ADSVAWAR	13969.6	Rodentia	Order	Eukaryota	Metazoa	Chordata	Mammalia	Rodentia
ADTAWNAVLLR	2607.07	Rodentia	Order	Eukaryota	Metazoa	Chordata	Mammalia	Rodentia
ADTDDAPVPAPAGDQK	772.815	Rodentia	Order	Eukaryota	Metazoa	Chordata	Mammalia	Rodentia
ADTENGVLLIK	2089.85	Lactobacillus	Genus	Bacteria		Firmicutes	Bacilli	Lactobacillales	Lactobacillaceae	Lactobacillus
ADTTTLTFDPETK	3933.17	Anaerotruncus sp. G3(2012)	Species	Bacteria		Firmicutes	Clostridia	Clostridiales	Ruminococcaceae	Anaerotruncus	Anaerotruncus sp. G3(2012)
ADTVSAGEDSITVDGK	45601.8	Firmicutes	Phylum	Bacteria		Firmicutes
ADTVSASDDSITVDGK	6555.85	Clostridium	Genus	Bacteria		Firmicutes	Clostridia	Clostridiales	Clostridiaceae	Clostridium
ADTVTAGEDSITVDGK	63356.4	Firmicutes	Phylum	Bacteria		Firmicutes
ADTYFILK	9368.6	Bacteria	Superkingdom	Bacteria
ADTYVIFAMTDK	2385.76	Anaerotruncus sp. G3(2012)	Species	Bacteria		Firmicutes	Clostridia	Clostridiales	Ruminococcaceae	Anaerotruncus	Anaerotruncus sp. G3(2012)
ADTYVVFAVTTPDIGTR	3206.43	Bacteria	Superkingdom	Bacteria
ADVENLAGGDGSGR	35925.9	Clostridiales	Order	Bacteria		Firmicutes	Clostridia	Clostridiales
ADVGFAMGSGTEAAK	15604.1	Bacteria	Superkingdom	Bacteria
ADVLIEEQIAK	5620.72	Bacteroides	Genus	Bacteria		Bacteroidetes	Bacteroidia	Bacteroidales	Bacteroidaceae	Bacteroides
ADVTLATIPVPIEEASR	6597.48	Clostridiales	Order	Bacteria		Firmicutes	Clostridia	Clostridiales
ADVVESWIGEK	1747.18	Metazoa	Kingdom	Eukaryota	Metazoa
ADWSSLSR	30366.8	Rodentia	Order	Eukaryota	Metazoa	Chordata	Mammalia	Rodentia
ADYPAEIR	12339.3	Clostridiales	Order	Bacteria		Firmicutes	Clostridia	Clostridiales
ADYPEGDGNWANYNTFGSAEAATSDDYK	314.031	Mammalia	Class	Eukaryota	Metazoa	Chordata	Mammalia
ADYTASYK	3039.27	Lachnospiraceae bacterium MD335	Species	Bacteria		Firmicutes	Clostridia	Clostridiales	Lachnospiraceae		Lachnospiraceae bacterium MD335
ADYTDYSSIDK	5670.83	Oscillibacter sp. 1-3	Species	Bacteria		Firmicutes	Clostridia	Clostridiales	Oscillospiraceae	Oscillibacter	Oscillibacter sp. 1-3
ADYTDYSSIDKAPEEK	1521.86	Oscillibacter sp. 1-3	Species	Bacteria		Firmicutes	Clostridia	Clostridiales	Oscillospiraceae	Oscillibacter	Oscillibacter sp. 1-3
AEAAPEAVAAETVSAVK	1512.56	Lachnospiraceae bacterium MD335	Species	Bacteria		Firmicutes	Clostridia	Clostridiales	Lachnospiraceae		Lachnospiraceae bacterium MD335
AEAAQMLMQYFSNK	996.144	Hungateiclostridiaceae bacterium KB18	Species	Bacteria		Firmicutes	Clostridia	Clostridiales	Hungateiclostridiaceae		Hungateiclostridiaceae bacterium KB18
AEAEALTDKADGTAFTDEEK	563.533	Lachnospiraceae bacterium MD335	Species	Bacteria		Firmicutes	Clostridia	Clostridiales	Lachnospiraceae		Lachnospiraceae bacterium MD335
AEAEALYQTK	1578.37	Mammalia	Class	Eukaryota	Metazoa	Chordata	Mammalia
AEAEAQAEELSFPR	1856.15	Mammalia	Class	Eukaryota	Metazoa	Chordata	Mammalia
AEAEAWYQTK	1992.53	Chordata	Phylum	Eukaryota	Metazoa	Chordata
AEAEEIKTK	5284.08	Bacteria	Superkingdom	Bacteria
AEAESWYR	8952.13	Metazoa	Kingdom	Eukaryota	Metazoa
AEAETLPSLPITK	7134.68	Mus musculus	Species	Eukaryota	Metazoa	Chordata	Mammalia	Rodentia	Muridae	Mus	Mus musculus
AEAETMYQIK	25319.2	Chordata	Phylum	Eukaryota	Metazoa	Chordata
AEAFTGNLEGLNK	18561.7	Hungateiclostridiaceae bacterium KB18	Species	Bacteria		Firmicutes	Clostridia	Clostridiales	Hungateiclostridiaceae		Hungateiclostridiaceae bacterium KB18
AEAGDNLGALVR	6838.3	Chordata	Phylum	Eukaryota	Metazoa	Chordata
AEAGEGQKPSPAQLELR	1470.72	Muridae	Family	Eukaryota	Metazoa	Chordata	Mammalia	Rodentia	Muridae
AEALPLQR	4715.74	Eukaryota	Superkingdom	Eukaryota
AEAMDGSGASAIYPVIITPK	532.471	Lachnospiraceae bacterium A4	Species	Bacteria		Firmicutes	Clostridia	Clostridiales	Lachnospiraceae		Lachnospiraceae bacterium A4
AEAQGFEVYTAAEAAK	16062.1	Bacteria	Superkingdom	Bacteria
AEAVSTLDR	60725.6	Clostridium sp. MD294	Species	Bacteria		Firmicutes	Clostridia	Clostridiales	Clostridiaceae	Clostridium	Clostridium sp. MD294
AEAVTLLNR	7346.04	Firmicutes	Phylum	Bacteria		Firmicutes
AEAYGPLTQGIAAPVNDLSR	5786.43	Firmicutes	Phylum	Bacteria		Firmicutes
AEDEEATFR	11157.2	Muridae	Family	Eukaryota	Metazoa	Chordata	Mammalia	Rodentia	Muridae
AEDGSVIDYELIDQDAR	8900.48	Mammalia	Class	Eukaryota	Metazoa	Chordata	Mammalia
AEDIIVYEIGNDGVSK	2570.65	Lachnospiraceae bacterium A4	Species	Bacteria		Firmicutes	Clostridia	Clostridiales	Lachnospiraceae		Lachnospiraceae bacterium A4
AEDKEWIPVTK	1838.82	Metazoa	Kingdom	Eukaryota	Metazoa
AEDLTKEESNWR	1804.77	Lachnospiraceae bacterium A4	Species	Bacteria		Firmicutes	Clostridia	Clostridiales	Lachnospiraceae		Lachnospiraceae bacterium A4
AEDYADIDAAPEEKER	6254.5	Lactobacillus	Genus	Bacteria		Firmicutes	Bacilli	Lactobacillales	Lactobacillaceae	Lactobacillus
AEDYASIDAAPEER	23655.5	Lactobacillaceae	Family	Bacteria		Firmicutes	Bacilli	Lactobacillales	Lactobacillaceae
AEDYASIDAAPEERER	3779.19	Lactobacillaceae	Family	Bacteria		Firmicutes	Bacilli	Lactobacillales	Lactobacillaceae
AEEFTTNPGTDSEK	37908.8	Lachnospiraceae bacterium MD335	Species	Bacteria		Firmicutes	Clostridia	Clostridiales	Lachnospiraceae		Lachnospiraceae bacterium MD335
AEEIGLER	33730.2	Thermococcus cleftensis	Species	Archaea		Euryarchaeota	Thermococci	Thermococcales	Thermococcaceae	Thermococcus	Thermococcus cleftensis
AEEISQIIR	6058.03	Bacteria	Superkingdom	Bacteria
AEELFAVSEEHAK	1903.34	Lachnospiraceae bacterium A2	Species	Bacteria		Firmicutes	Clostridia	Clostridiales	Lachnospiraceae		Lachnospiraceae bacterium A2
AEELGYEVK	8940.33	Firmicutes	Phylum	Bacteria		Firmicutes
AEELLAQLGR	1599.22	Rodentia	Order	Eukaryota	Metazoa	Chordata	Mammalia	Rodentia
AEETGDDSIAENAK	846.968	Pseudodesulfovibrio piezophilus	Species	Bacteria		Proteobacteria	Deltaproteobacteria	Desulfovibrionales	Desulfovibrionaceae	Pseudodesulfovibrio	Pseudodesulfovibrio piezophilus
AEEYEFLTPMEEAPK	17212.5	Metazoa	Kingdom	Eukaryota	Metazoa
AEEYLDILK	3796.64	Mannheimia haemolytica	Species	Bacteria		Proteobacteria	Gammaproteobacteria	Pasteurellales	Pasteurellaceae	Mannheimia	Mannheimia haemolytica
AEGEAFGKK	2124.01	Bacteria	Superkingdom	Bacteria
AEGMGAFLER	1999.09	Butyrivibrio fibrisolvens	Species	Bacteria		Firmicutes	Clostridia	Clostridiales	Lachnospiraceae	Butyrivibrio	Butyrivibrio fibrisolvens
AEGSVDGVPADATTDSFHYVFK	1798.78	Lachnospiraceae bacterium MD335	Species	Bacteria		Firmicutes	Clostridia	Clostridiales	Lachnospiraceae		Lachnospiraceae bacterium MD335
AEGVDLSGDK	29464.4	Firmicutes	Phylum	Bacteria		Firmicutes
AEGYNQIADIFTETANNEK	245.806	Mucispirillum schaedleri	Species	Bacteria		Deferribacteres	Deferribacteres	Deferribacterales	Deferribacteraceae	Mucispirillum	Mucispirillum schaedleri
AEIASLHQR	34307.8	Clostridiales	Order	Bacteria		Firmicutes	Clostridia	Clostridiales
AEIDMLDIR	510982	Mammalia	Class	Eukaryota	Metazoa	Chordata	Mammalia
AEIIEYNPGFEVNHK	13086.5	Eubacterium plexicaudatum	Species	Bacteria		Firmicutes	Clostridia	Clostridiales	Eubacteriaceae	Eubacterium	Eubacterium plexicaudatum
AEIQVALEK	5246.75	Lachnospiraceae	Family	Bacteria		Firmicutes	Clostridia	Clostridiales	Lachnospiraceae
AELDMFTTPK	21278.9	Lachnospiraceae bacterium A2	Species	Bacteria		Firmicutes	Clostridia	Clostridiales	Lachnospiraceae		Lachnospiraceae bacterium A2
AELDQLPGAQEK	5012.54	Mus musculus	Species	Eukaryota	Metazoa	Chordata	Mammalia	Rodentia	Muridae	Mus	Mus musculus
AELEALLSSK	1748.75	Mammalia	Class	Eukaryota	Metazoa	Chordata	Mammalia
AELEHTNNVDAAAYLGK	5854.79	Lachnospiraceae bacterium MD335	Species	Bacteria		Firmicutes	Clostridia	Clostridiales	Lachnospiraceae		Lachnospiraceae bacterium MD335
AELENVPLR	57720.5	Lachnospiraceae bacterium A4	Species	Bacteria		Firmicutes	Clostridia	Clostridiales	Lachnospiraceae		Lachnospiraceae bacterium A4
AELNEFLTR	11727.8	Eukaryota	Superkingdom	Eukaryota
AELSSLQTSR	4085.77	Mammalia	Class	Eukaryota	Metazoa	Chordata	Mammalia
AELVAAVAAK	3588.25	[Eubacterium] sulci	Species	Bacteria		Firmicutes	Clostridia	Clostridiales	Clostridiales Family XIII. Incertae Sedis		[Eubacterium] sulci
AELVFTAADGTETR	4388.82	Firmicutes	Phylum	Bacteria		Firmicutes
AELVFTGEDGTQIR	2839.95	Lachnospiraceae bacterium MD335	Species	Bacteria		Firmicutes	Clostridia	Clostridiales	Lachnospiraceae		Lachnospiraceae bacterium MD335
AELVSNVATATGLTK	4393.05	Lactobacillus	Genus	Bacteria		Firmicutes	Bacilli	Lactobacillales	Lactobacillaceae	Lactobacillus
AENFFILR	4956.42	Eukaryota	Superkingdom	Eukaryota
AENGEEAWEYIVK	5529.26	Lachnospiraceae bacterium A4	Species	Bacteria		Firmicutes	Clostridia	Clostridiales	Lachnospiraceae		Lachnospiraceae bacterium A4
AENIGASDEEYNEEIKK	3016.62	Lachnospiraceae bacterium MD335	Species	Bacteria		Firmicutes	Clostridia	Clostridiales	Lachnospiraceae		Lachnospiraceae bacterium MD335
AENIIFENSFNR	2678.5	Lachnospiraceae bacterium MD335	Species	Bacteria		Firmicutes	Clostridia	Clostridiales	Lachnospiraceae		Lachnospiraceae bacterium MD335
AENLVIDGAIQGK	2923.29	Lachnospiraceae bacterium A4	Species	Bacteria		Firmicutes	Clostridia	Clostridiales	Lachnospiraceae		Lachnospiraceae bacterium A4
AENVVVQDGKGDQAEQTNQIQNFITQK	351.101	Clostridiales	Order	Bacteria		Firmicutes	Clostridia	Clostridiales
AENYDISPADR	3354.61	Metazoa	Kingdom	Eukaryota	Metazoa
AEPEDHYFLLTEPPLNTPENR	3406.15	Eukaryota	Superkingdom	Eukaryota
AEQEEYVQEGIR	909.391	Metazoa	Kingdom	Eukaryota	Metazoa
AESDIMNR	8880.41	Chordata	Phylum	Eukaryota	Metazoa	Chordata
AETFDHVLTAR	2030.93	Lachnospiraceae bacterium A2	Species	Bacteria		Firmicutes	Clostridia	Clostridiales	Lachnospiraceae		Lachnospiraceae bacterium A2
AETLFTEAEK	5384.44	Anaerotruncus sp. G3(2012)	Species	Bacteria		Firmicutes	Clostridia	Clostridiales	Ruminococcaceae	Anaerotruncus	Anaerotruncus sp. G3(2012)
AETLYNEIDR	6300.42	Alistipes putredinis	Species	Bacteria		Bacteroidetes	Bacteroidia	Bacteroidales	Rikenellaceae	Alistipes	Alistipes putredinis
AEVDLQGIK	22539.8	Mammalia	Class	Eukaryota	Metazoa	Chordata	Mammalia
AEVETVLAQTGK	6543.64	Mucispirillum schaedleri	Species	Bacteria		Deferribacteres	Deferribacteres	Deferribacterales	Deferribacteraceae	Mucispirillum	Mucispirillum schaedleri
AEVIEFNPGFTPDNK	9176.58	Firmicutes	Phylum	Bacteria		Firmicutes
AEVIEYNPGFTPDNK	1947.58	Clostridiales	Order	Bacteria		Firmicutes	Clostridia	Clostridiales
AEVLSYPER	78569.4	Mus musculus	Species	Eukaryota	Metazoa	Chordata	Mammalia	Rodentia	Muridae	Mus	Mus musculus
AEVPSGASTGENEAVELR	11315.5	Bacteria	Superkingdom	Bacteria
AEVQTLVSR	10599.9	Rodentia	Order	Eukaryota	Metazoa	Chordata	Mammalia	Rodentia
AEVVNGDMK	24766.6	Clostridium sp. MD294	Species	Bacteria		Firmicutes	Clostridia	Clostridiales	Clostridiaceae	Clostridium	Clostridium sp. MD294
AEYALASNADQGFGGAR	1386.31	Lachnospiraceae bacterium A2	Species	Bacteria		Firmicutes	Clostridia	Clostridiales	Lachnospiraceae		Lachnospiraceae bacterium A2
AEYFLQR	14241.1	Bacteria	Superkingdom	Bacteria
AEYIHFTPDFVLGR	29251.4	Rodentia	Order	Eukaryota	Metazoa	Chordata	Mammalia	Rodentia
AEYLQTWSTLLPNINK	17123.7	Muridae	Family	Eukaryota	Metazoa	Chordata	Mammalia	Rodentia	Muridae
AEYPIAVDR	49740.2	Clostridia	Class	Bacteria		Firmicutes	Clostridia
AEYPIAVER	27926.2	Bacteria	Superkingdom	Bacteria
AEYPNWTNVAPDNYYSEQDAEK	385.879	Anaerotruncus sp. G3(2012)	Species	Bacteria		Firmicutes	Clostridia	Clostridiales	Ruminococcaceae	Anaerotruncus	Anaerotruncus sp. G3(2012)
AFAAEFSQK	18402.7	Lachnospiraceae	Family	Bacteria		Firmicutes	Clostridia	Clostridiales	Lachnospiraceae
AFADELEENLK	7424.84	Firmicutes	Phylum	Bacteria		Firmicutes
AFAEVLNNLDVK	2707.25	Lactobacillus	Genus	Bacteria		Firmicutes	Bacilli	Lactobacillales	Lactobacillaceae	Lactobacillus
AFAPSYSVDISGGK	2304.98	Lachnospiraceae bacterium A4	Species	Bacteria		Firmicutes	Clostridia	Clostridiales	Lachnospiraceae		Lachnospiraceae bacterium A4
AFAYFQENAPSAQNDR	4001.47	Lachnospiraceae bacterium A4	Species	Bacteria		Firmicutes	Clostridia	Clostridiales	Lachnospiraceae		Lachnospiraceae bacterium A4
AFDADGNPIMNEK	8477.08	Lachnospiraceae bacterium TWA4	Species	Bacteria		Firmicutes	Clostridia	Clostridiales	Lachnospiraceae		Lachnospiraceae bacterium TWA4
AFDDSYDTPIVAGK	3893.13	Clostridiales	Order	Bacteria		Firmicutes	Clostridia	Clostridiales
AFDDSYDTPIVAGKK	607.638	Clostridiales	Order	Bacteria		Firmicutes	Clostridia	Clostridiales
AFDLAPPEAVPQQK	2293.91	Rodentia	Order	Eukaryota	Metazoa	Chordata	Mammalia	Rodentia
AFDLEGIDDDFR	1663.12	Lachnospiraceae bacterium M18-1	Species	Bacteria		Firmicutes	Clostridia	Clostridiales	Lachnospiraceae		Lachnospiraceae bacterium M18-1
AFDLGATGVMTDYPTK	3678.66	Metazoa	Kingdom	Eukaryota	Metazoa
AFDQGADAIYEHINEGK	5851.61	Mammalia	Class	Eukaryota	Metazoa	Chordata	Mammalia
AFDSGIIPMEFVNK	4036.73	Chordata	Phylum	Eukaryota	Metazoa	Chordata
AFDTAEGGGQYATGGR	12503	Lachnospiraceae bacterium MD335	Species	Bacteria		Firmicutes	Clostridia	Clostridiales	Lachnospiraceae		Lachnospiraceae bacterium MD335
AFDTNNNQIEEK	730.837	Lachnospiraceae bacterium MD335	Species	Bacteria		Firmicutes	Clostridia	Clostridiales	Lachnospiraceae		Lachnospiraceae bacterium MD335
AFDVPIEEGPVFR	4625.75	Mus musculus	Species	Eukaryota	Metazoa	Chordata	Mammalia	Rodentia	Muridae	Mus	Mus musculus
AFDVVEDGTFK	18352.3	Lachnospiraceae bacterium MD335	Species	Bacteria		Firmicutes	Clostridia	Clostridiales	Lachnospiraceae		Lachnospiraceae bacterium MD335
AFEDEMSGR	3085.52	Chordata	Phylum	Eukaryota	Metazoa	Chordata
AFEGLLNR	39146.1	Firmicutes	Phylum	Bacteria		Firmicutes
AFEPVAQSAGGAASATGWNK	1904.01	Lactobacillus	Genus	Bacteria		Firmicutes	Bacilli	Lactobacillales	Lactobacillaceae	Lactobacillus
AFFDQYQPK	7059.15	Eubacterium plexicaudatum	Species	Bacteria		Firmicutes	Clostridia	Clostridiales	Eubacteriaceae	Eubacterium	Eubacterium plexicaudatum
AFFSEVER	3139.74	Metazoa	Kingdom	Eukaryota	Metazoa
AFGENAVVQLISLQK	314.291	Mus musculus	Species	Eukaryota	Metazoa	Chordata	Mammalia	Rodentia	Muridae	Mus	Mus musculus
AFGGDNYYVTNYQEMK	795.835	Lactobacillus	Genus	Bacteria		Firmicutes	Bacilli	Lactobacillales	Lactobacillaceae	Lactobacillus
AFGGQFQPK	7423.11	Mucispirillum schaedleri	Species	Bacteria		Deferribacteres	Deferribacteres	Deferribacterales	Deferribacteraceae	Mucispirillum	Mucispirillum schaedleri
AFGGQSLK	12805.1	Eukaryota	Superkingdom	Eukaryota
AFHDEDPDGNGTK	2510.95	Lachnospiraceae bacterium MD335	Species	Bacteria		Firmicutes	Clostridia	Clostridiales	Lachnospiraceae		Lachnospiraceae bacterium MD335
AFIDIDMTK	2578	Lachnospiraceae bacterium MD335	Species	Bacteria		Firmicutes	Clostridia	Clostridiales	Lachnospiraceae		Lachnospiraceae bacterium MD335
AFIDVVTEELK	5157.92	Firmicutes	Phylum	Bacteria		Firmicutes
AFIFPQESSTAYVSLIPK	34473.3	Mus musculus	Species	Eukaryota	Metazoa	Chordata	Mammalia	Rodentia	Muridae	Mus	Mus musculus
AFILADPDGSNR	183794	Rodentia	Order	Eukaryota	Metazoa	Chordata	Mammalia	Rodentia
AFILTGEGR	20129.8	Oscillibacter sp. 1-3	Species	Bacteria		Firmicutes	Clostridia	Clostridiales	Oscillospiraceae	Oscillibacter	Oscillibacter sp. 1-3
AFINLEAAGVGGK	4054.98	Chordata	Phylum	Eukaryota	Metazoa	Chordata
AFINSQLR	8256.98	Tribolium castaneum	Species	Eukaryota	Metazoa	Arthropoda	Insecta	Coleoptera	Tenebrionidae	Tribolium	Tribolium castaneum
AFIQNLR	4079.29	Dermabacter sp. HFH0086	Species	Bacteria		Actinobacteria	Actinobacteria	Micrococcales	Dermabacteraceae	Dermabacter	Dermabacter sp. HFH0086
AFITNLYGATIANPEMTEYTANSDAGVQALTK	110.101	Anaerotruncus sp. G3(2012)	Species	Bacteria		Firmicutes	Clostridia	Clostridiales	Ruminococcaceae	Anaerotruncus	Anaerotruncus sp. G3(2012)
AFIVLNPDYK	3370.51	Mammalia	Class	Eukaryota	Metazoa	Chordata	Mammalia
AFIVTDPMMVQLGNVDK	983.983	Anaerotruncus sp. G3(2012)	Species	Bacteria		Firmicutes	Clostridia	Clostridiales	Ruminococcaceae	Anaerotruncus	Anaerotruncus sp. G3(2012)
AFLEGAELVNEVK	2650.16	Firmicutes	Phylum	Bacteria		Firmicutes
AFLIEEQK	9325.64	Eukaryota	Superkingdom	Eukaryota
AFLNGEVR	13138.3	Clostridiales	Order	Bacteria		Firmicutes	Clostridia	Clostridiales
AFMDQDFILQTQTASDLYHK	1830.58	Lachnospiraceae bacterium MD335	Species	Bacteria		Firmicutes	Clostridia	Clostridiales	Lachnospiraceae		Lachnospiraceae bacterium MD335
AFMPYGGIK	13546.4	Bacteria	Superkingdom	Bacteria
AFNEDSNTPIMR	6323.23	Clostridiales	Order	Bacteria		Firmicutes	Clostridia	Clostridiales
AFQGLYNR	21151.8	Bacteria	Superkingdom	Bacteria
AFQGTEFEGLVESLK	3296.59	Lachnospiraceae bacterium MD335	Species	Bacteria		Firmicutes	Clostridia	Clostridiales	Lachnospiraceae		Lachnospiraceae bacterium MD335
AFQINTFNLK	1962.85	Mus musculus	Species	Eukaryota	Metazoa	Chordata	Mammalia	Rodentia	Muridae	Mus	Mus musculus
AFQNVIAPR	9837.81	Mus musculus	Species	Eukaryota	Metazoa	Chordata	Mammalia	Rodentia	Muridae	Mus	Mus musculus
AFSDLDGIGSVLGGR	5116.96	Mus musculus	Species	Eukaryota	Metazoa	Chordata	Mammalia	Rodentia	Muridae	Mus	Mus musculus
AFSEEGLK	8735.21	Salmonella	Genus	Bacteria		Proteobacteria	Gammaproteobacteria	Enterobacterales	Enterobacteriaceae	Salmonella
AFSGYLGPDESK	4037.31	Mus musculus	Species	Eukaryota	Metazoa	Chordata	Mammalia	Rodentia	Muridae	Mus	Mus musculus
AFSLAIDR	6746.85	Bacteria	Superkingdom	Bacteria
AFSPTTVNTGR	4823.69	Eukaryota	Superkingdom	Eukaryota
AFTDIVADELK	3114.22	Firmicutes	Phylum	Bacteria		Firmicutes
AFTDVIAEELK	7323.8	Lachnospiraceae	Family	Bacteria		Firmicutes	Clostridia	Clostridiales	Lachnospiraceae
AFTDVIAEELKK	1225.7	Lachnospiraceae	Family	Bacteria		Firmicutes	Clostridia	Clostridiales	Lachnospiraceae
AFTDVLDR	4683.7	Lachnospiraceae bacterium MD335	Species	Bacteria		Firmicutes	Clostridia	Clostridiales	Lachnospiraceae		Lachnospiraceae bacterium MD335
AFTDVVADELK	11428.4	Clostridiales	Order	Bacteria		Firmicutes	Clostridia	Clostridiales
AFTDVVADELKK	27626.6	Clostridiales	Order	Bacteria		Firmicutes	Clostridia	Clostridiales
AFTDVVAEELK	21226.5	Firmicutes	Phylum	Bacteria		Firmicutes
AFTDVVAEELKK	5108.48	Firmicutes	Phylum	Bacteria		Firmicutes
AFTDVVTEELK	4301.45	Clostridium	Genus	Bacteria		Firmicutes	Clostridia	Clostridiales	Clostridiaceae	Clostridium
AFTYALK	5668.25	Firmicutes	Phylum	Bacteria		Firmicutes
AFVDGAELVNQVK	12170	Clostridium sp. MD294	Species	Bacteria		Firmicutes	Clostridia	Clostridiales	Clostridiaceae	Clostridium	Clostridium sp. MD294
AFVDYFIDIANEK	1224.19	Clostridiales	Order	Bacteria		Firmicutes	Clostridia	Clostridiales
AFVENFK	3077.03	Bacilli	Class	Bacteria		Firmicutes	Bacilli
AFVEVITEELK	10489.5	Lachnospiraceae bacterium M18-1	Species	Bacteria		Firmicutes	Clostridia	Clostridiales	Lachnospiraceae		Lachnospiraceae bacterium M18-1
AFVEVNEEGTEAAAATAGMMTVR	3649.22	Mus musculus	Species	Eukaryota	Metazoa	Chordata	Mammalia	Rodentia	Muridae	Mus	Mus musculus
AFVNDVTK	26707.8	Clostridiales	Order	Bacteria		Firmicutes	Clostridia	Clostridiales
AFVNEVTK	32522	Clostridiales	Order	Bacteria		Firmicutes	Clostridia	Clostridiales
AFVPLSEMAGYSNDLR	13309.6	Anaerotruncus sp. G3(2012)	Species	Bacteria		Firmicutes	Clostridia	Clostridiales	Ruminococcaceae	Anaerotruncus	Anaerotruncus sp. G3(2012)
AFYLEQVK	3490.33	Lachnospiraceae bacterium A2	Species	Bacteria		Firmicutes	Clostridia	Clostridiales	Lachnospiraceae		Lachnospiraceae bacterium A2
AFYNNVLGEYEEYITK	2290.19	Metazoa	Kingdom	Eukaryota	Metazoa
AGAANIVPNSTGAAK	241481	Bacteria	Superkingdom	Bacteria
AGAAYVSPFLGR	67084	Bacteria	Superkingdom	Bacteria
AGADGLLVVTPYYNK	17584.7	Firmicutes	Phylum	Bacteria		Firmicutes
AGADIATVPYK	10566.6	Firmicutes	Phylum	Bacteria		Firmicutes
AGAEYFQTQAVYEPEK	2175.61	Oxobacter pfennigii	Species	Bacteria		Firmicutes	Clostridia	Clostridiales	Clostridiaceae	Oxobacter	Oxobacter pfennigii
AGAGSATLSMAYAGAR	12039.5	Eukaryota	Superkingdom	Eukaryota
AGAGTNFAK	4089.03	Firmicutes bacterium ASF500	Species	Bacteria		Firmicutes					Firmicutes bacterium ASF500
AGAGTNNIPLEK	3719.13	Lachnospiraceae bacterium MD335	Species	Bacteria		Firmicutes	Clostridia	Clostridiales	Lachnospiraceae		Lachnospiraceae bacterium MD335
AGAGVNNIPLEK	15787.3	Bacteria	Superkingdom	Bacteria
AGAINIVPNSTGAAK	144933	Bacteria	Superkingdom	Bacteria
AGANGLLLVTPYYNK	5098.49	Selenomonas	Genus	Bacteria		Firmicutes	Negativicutes	Selenomonadales	Selenomonadaceae	Selenomonas
AGAPVEITAVYASSK	2488.14	Lachnospiraceae bacterium MD335	Species	Bacteria		Firmicutes	Clostridia	Clostridiales	Lachnospiraceae		Lachnospiraceae bacterium MD335
AGAQNIVPNSTGAAK	124133	Bacteria	Superkingdom	Bacteria
AGATFVSPFLGR	9079.93	Bacteria	Superkingdom	Bacteria
AGATYVSPFLGR	94303.5	Bacteria	Superkingdom	Bacteria
AGAVAEEVLAAIR	37614.1	Chordata	Phylum	Eukaryota	Metazoa	Chordata
AGAVILEPIMK	10545.1	Bacteria	Superkingdom	Bacteria
AGAVNIVPNSTGAAK	801140	Firmicutes	Phylum	Bacteria		Firmicutes
AGAVNPTVK	6164.22	Mammalia	Class	Eukaryota	Metazoa	Chordata	Mammalia
AGAYAVGTGSSLTK	62977.1	Bacteria	Superkingdom	Bacteria
AGDDAAGLAISENMR	12694.9	Geobacter	Genus	Bacteria		Proteobacteria	Deltaproteobacteria	Desulfuromonadales	Geobacteraceae	Geobacter
AGDDAAGLAISEQMR	17637.7	Clostridiales	Order	Bacteria		Firmicutes	Clostridia	Clostridiales
AGDDAAGLAISESMR	170708	Lachnospiraceae bacterium JC7	Species	Bacteria		Firmicutes	Clostridia	Clostridiales	Lachnospiraceae		Lachnospiraceae bacterium JC7
AGDDAAGLAVSEK	66922.4	Bacteria	Superkingdom	Bacteria
AGDDAAGLSISEK	327796	Bacteria	Superkingdom	Bacteria
AGDDASGLAISEK	59589.5	Anaerotruncus	Genus	Bacteria		Firmicutes	Clostridia	Clostridiales	Ruminococcaceae	Anaerotruncus
AGDEFVEK	20546	Mammalia	Class	Eukaryota	Metazoa	Chordata	Mammalia
AGDISYGEMVNGQWVEHTLPAGGVDIK	474.181	Dorea sp. 5-2	Species	Bacteria		Firmicutes	Clostridia	Clostridiales	Lachnospiraceae	Dorea	Dorea sp. 5-2
AGDLGVDLTSK	7469.82	Mammalia	Class	Eukaryota	Metazoa	Chordata	Mammalia
AGDNAAGLAISEK	81105.3	Firmicutes	Phylum	Bacteria		Firmicutes
AGDNVIYSK	64095.8	Lachnospiraceae	Family	Bacteria		Firmicutes	Clostridia	Clostridiales	Lachnospiraceae
AGDQVIYSK	9292.78	Clostridiales	Order	Bacteria		Firmicutes	Clostridia	Clostridiales
AGDTPNDAWEK	21369.3	Clostridiales	Order	Bacteria		Firmicutes	Clostridia	Clostridiales
AGDTVLLK	4303.33	Bacteria	Superkingdom	Bacteria
AGDTVTVAYR	18194.2	Bacteria	Superkingdom	Bacteria
AGDVFFIK	2751.85	Dorea sp. 5-2	Species	Bacteria		Firmicutes	Clostridia	Clostridiales	Lachnospiraceae	Dorea	Dorea sp. 5-2
AGDVIELR	23163	Bacteria	Superkingdom	Bacteria
AGDVIEVR	60793.4	Bacteria	Superkingdom	Bacteria
AGDVVEIK	11768.1	Bacteria	Superkingdom	Bacteria
AGDVVEVK	6327.2	Proteobacteria	Phylum	Bacteria		Proteobacteria
AGEAVTGQVIGVK	1921.9	Clostridiales	Order	Bacteria		Firmicutes	Clostridia	Clostridiales
AGEEITEAIAEAIEK	2999.97	Alistipes finegoldii	Species	Bacteria		Bacteroidetes	Bacteroidia	Bacteroidales	Rikenellaceae	Alistipes	Alistipes finegoldii
AGEIPDGWQGLDIGPETVK	1478.27	Oscillibacter sp. KLE 1745	Species	Bacteria		Firmicutes	Clostridia	Clostridiales	Oscillospiraceae	Oscillibacter	Oscillibacter sp. KLE 1745
AGELLVPFR	4956.81	Bacteria	Superkingdom	Bacteria
AGEMSAITETIDAK	13622.8	Lachnospiraceae bacterium MD335	Species	Bacteria		Firmicutes	Clostridia	Clostridiales	Lachnospiraceae		Lachnospiraceae bacterium MD335
AGENAVMTAK	26025.4	Lachnospiraceae bacterium MD335	Species	Bacteria		Firmicutes	Clostridia	Clostridiales	Lachnospiraceae		Lachnospiraceae bacterium MD335
AGEQVAQYTLNIIDTAK	1895.36	Lachnospiraceae bacterium A4	Species	Bacteria		Firmicutes	Clostridia	Clostridiales	Lachnospiraceae		Lachnospiraceae bacterium A4
AGESAVMTAK	28004.4	Lachnospiraceae bacterium MD335	Species	Bacteria		Firmicutes	Clostridia	Clostridiales	Lachnospiraceae		Lachnospiraceae bacterium MD335
AGETEMQQVADLLGGK	1429.41	Oscillibacter sp. 1-3	Species	Bacteria		Firmicutes	Clostridia	Clostridiales	Oscillospiraceae	Oscillibacter	Oscillibacter sp. 1-3
AGETVDIVGLQEEK	17306.5	Firmicutes bacterium ASF500	Species	Bacteria		Firmicutes					Firmicutes bacterium ASF500
AGETVDIVGLQEEKK	5248.95	Firmicutes bacterium ASF500	Species	Bacteria		Firmicutes					Firmicutes bacterium ASF500
AGETVEIVGLSEEK	6051.39	Clostridiales	Order	Bacteria		Firmicutes	Clostridia	Clostridiales
AGETVEIVGLSEEKK	6679.4	Clostridiales	Order	Bacteria		Firmicutes	Clostridia	Clostridiales
AGETVEIVGLTDEK	12153.3	Flavonifractor	Genus	Bacteria		Firmicutes	Clostridia	Clostridiales	Ruminococcaceae	Flavonifractor
AGEVIGEALPASPGAAAGK	18406.6	Clostridiales	Order	Bacteria		Firmicutes	Clostridia	Clostridiales
AGEVIGQALPASPGAAAGK	23771.4	Firmicutes	Phylum	Bacteria		Firmicutes
AGEVIGSALPASPGAAAGK	22472.5	Firmicutes	Phylum	Bacteria		Firmicutes
AGEVPEAIR	53311.8	Bacteria	Superkingdom	Bacteria
AGEVTAAIAK	24630	Bacteria	Superkingdom	Bacteria
AGEVVGLAGLMGAGR	3880.74	Bacteria	Superkingdom	Bacteria
AGEVVYIK	4685.56	Lachnospiraceae bacterium A4	Species	Bacteria		Firmicutes	Clostridia	Clostridiales	Lachnospiraceae		Lachnospiraceae bacterium A4
AGEYSVMYDGFNTFTILK	342.875	Mus musculus	Species	Eukaryota	Metazoa	Chordata	Mammalia	Rodentia	Muridae	Mus	Mus musculus
AGEYSVTYDGFNTFTIPK	21362.7	Mus	Genus	Eukaryota	Metazoa	Chordata	Mammalia	Rodentia	Muridae	Mus
AGFLGIPIPK	3623.69	Roseburia	Genus	Bacteria		Firmicutes	Clostridia	Clostridiales	Lachnospiraceae	Roseburia
AGFLGIPVPK	33783.3	Firmicutes	Phylum	Bacteria		Firmicutes
AGFMGIPIPK	57394.7	Firmicutes	Phylum	Bacteria		Firmicutes
AGFMGIPVPK	16786.9	Firmicutes	Phylum	Bacteria		Firmicutes
AGFMLQEADK	8079.53	Mammalia	Class	Eukaryota	Metazoa	Chordata	Mammalia
AGFPDVAQNIYNMLR	1591.05	Lachnospiraceae	Family	Bacteria		Firmicutes	Clostridia	Clostridiales	Lachnospiraceae
AGFTNYGNK	18086.9	Lachnospiraceae bacterium A4	Species	Bacteria		Firmicutes	Clostridia	Clostridiales	Lachnospiraceae		Lachnospiraceae bacterium A4
AGFTSIMFDGSHYPIEENVAK	16928.2	Clostridiales	Order	Bacteria		Firmicutes	Clostridia	Clostridiales
AGFVDGGVIDAAK	8913.44	Anaerotruncus	Genus	Bacteria		Firmicutes	Clostridia	Clostridiales	Ruminococcaceae	Anaerotruncus
AGFVNIVGNPNVGK	4800.02	Bacteria	Superkingdom	Bacteria
AGGEVVALLK	730.67	Bacteria	Superkingdom	Bacteria
AGGIETIANEYSDR	1210.06	Metazoa	Kingdom	Eukaryota	Metazoa
AGGNFTQVK	5225.15	Mycena chlorophos	Species	Eukaryota	Fungi	Basidiomycota	Agaricomycetes	Agaricales	Mycenaceae	Mycena	Mycena chlorophos
AGGSASAMLQPLLDNQVGFK	1490.98	Metazoa	Kingdom	Eukaryota	Metazoa
AGGYADATNVDAVR	5000.24	Oscillibacter sp. 1-3	Species	Bacteria		Firmicutes	Clostridia	Clostridiales	Oscillospiraceae	Oscillibacter	Oscillibacter sp. 1-3
AGGYADATNVDAVRK	1207.92	Oscillibacter sp. 1-3	Species	Bacteria		Firmicutes	Clostridia	Clostridiales	Oscillospiraceae	Oscillibacter	Oscillibacter sp. 1-3
AGIEINRK	27647.1	Bacteria	Superkingdom	Bacteria
AGIEVGTEK	34430.3	Clostridiales	Order	Bacteria		Firmicutes	Clostridia	Clostridiales
AGILDPVK	19551.9	Bacteria	Superkingdom	Bacteria
AGILESTFR	8312.21	Butyricicoccus pullicaecorum	Species	Bacteria		Firmicutes	Clostridia	Clostridiales	Clostridiaceae	Butyricicoccus	Butyricicoccus pullicaecorum
AGILGGTGMVGQR	9026.94	Clostridiales	Order	Bacteria		Firmicutes	Clostridia	Clostridiales
AGIMDNVVVR	16466.8	Dorea sp. 5-2	Species	Bacteria		Firmicutes	Clostridia	Clostridiales	Lachnospiraceae	Dorea	Dorea sp. 5-2
AGINTVEELTNK	30034.9	Bacteria	Superkingdom	Bacteria
AGINTVEELTNR	33321.5	Clostridiales	Order	Bacteria		Firmicutes	Clostridia	Clostridiales
AGINTVEELTNRTPEDMMK	1074.58	Clostridiales	Order	Bacteria		Firmicutes	Clostridia	Clostridiales
AGIPLVEDFYFR	7914.98	Lachnospiraceae bacterium MD335	Species	Bacteria		Firmicutes	Clostridia	Clostridiales	Lachnospiraceae		Lachnospiraceae bacterium MD335
AGIPMDEVTTMADVVEPLK	2374.42	Anaerotruncus sp. G3(2012)	Species	Bacteria		Firmicutes	Clostridia	Clostridiales	Ruminococcaceae	Anaerotruncus	Anaerotruncus sp. G3(2012)
AGIQLDPTFVK	4069.33	Bacteria	Superkingdom	Bacteria
AGITGVEIAAR	9802.68	Firmicutes	Phylum	Bacteria		Firmicutes
AGITLLEK	1610.98	Bacteria	Superkingdom	Bacteria
AGITPIITPVADLVK	40990.9	Lachnospiraceae bacterium MD335	Species	Bacteria		Firmicutes	Clostridia	Clostridiales	Lachnospiraceae		Lachnospiraceae bacterium MD335
AGIVDPTMVTR	5740.12	Lactobacillus	Genus	Bacteria		Firmicutes	Bacilli	Lactobacillales	Lactobacillaceae	Lactobacillus
AGLAPLEVR	7263.11	Mammalia	Class	Eukaryota	Metazoa	Chordata	Mammalia
AGLDVDDFAGR	6008.1	Mucispirillum schaedleri	Species	Bacteria		Deferribacteres	Deferribacteres	Deferribacterales	Deferribacteraceae	Mucispirillum	Mucispirillum schaedleri
AGLEAALR	12501.8	Bacteria	Superkingdom	Bacteria
AGLEGFEK	6036.05	Bacteria	Superkingdom	Bacteria
AGLEQGSDAGYLAESQK	2181.62	Rodentia	Order	Eukaryota	Metazoa	Chordata	Mammalia	Rodentia
AGLGALQNR	82129	Bacteria	Superkingdom	Bacteria
AGLGEEFGYPIGTNVEGK	7172.04	Clostridiales	Order	Bacteria		Firmicutes	Clostridia	Clostridiales
AGLILFGNDDR	3332.61	Mammalia	Class	Eukaryota	Metazoa	Chordata	Mammalia
AGLNVAEEGAR	27872.5	Mus musculus	Species	Eukaryota	Metazoa	Chordata	Mammalia	Rodentia	Muridae	Mus	Mus musculus
AGLSLTDTFVK	4194.51	Oscillibacter sp. 1-3	Species	Bacteria		Firmicutes	Clostridia	Clostridiales	Oscillospiraceae	Oscillibacter	Oscillibacter sp. 1-3
AGLYETIGK	5546.2	Lachnospiraceae bacterium A2	Species	Bacteria		Firmicutes	Clostridia	Clostridiales	Lachnospiraceae		Lachnospiraceae bacterium A2
AGMDAVVLPDKIDQPFVSQLESK	3352.99	Lachnospiraceae bacterium A4	Species	Bacteria		Firmicutes	Clostridia	Clostridiales	Lachnospiraceae		Lachnospiraceae bacterium A4
AGMPQASPALLEPIGNLK	1507.67	Anaerotruncus sp. G3(2012)	Species	Bacteria		Firmicutes	Clostridia	Clostridiales	Ruminococcaceae	Anaerotruncus	Anaerotruncus sp. G3(2012)
AGNAILIK	5351.89	Bacteria	Superkingdom	Bacteria
AGNLGGGVVTIER	14989.8	Metazoa	Kingdom	Eukaryota	Metazoa
AGNQVPTTDVLDK	8180.55	Lachnospiraceae bacterium MD335	Species	Bacteria		Firmicutes	Clostridia	Clostridiales	Lachnospiraceae		Lachnospiraceae bacterium MD335
AGNYDIAR	14792.6	Lachnospiraceae bacterium MD335	Species	Bacteria		Firmicutes	Clostridia	Clostridiales	Lachnospiraceae		Lachnospiraceae bacterium MD335
AGPNIYELR	6939.66	Chordata	Phylum	Eukaryota	Metazoa	Chordata
AGPVLLEPIMK	15807.5	Bacteria	Superkingdom	Bacteria
AGPVLMEPIMK	12210.6	Bacteria	Superkingdom	Bacteria
AGPVWFYYEVGNADR	1398.93	Lachnospiraceae bacterium A4	Species	Bacteria		Firmicutes	Clostridia	Clostridiales	Lachnospiraceae		Lachnospiraceae bacterium A4
AGQAVDDFIEK	8325.9	Chordata	Phylum	Eukaryota	Metazoa	Chordata
AGQETIQNSSSSMQVGSR	2263.37	Roseburia	Genus	Bacteria		Firmicutes	Clostridia	Clostridiales	Lachnospiraceae	Roseburia
AGQGFTTEPVDLR	1778.87	Lactobacillus reuteri	Species	Bacteria		Firmicutes	Bacilli	Lactobacillales	Lactobacillaceae	Lactobacillus	Lactobacillus reuteri
AGQTIFIK	3887.34	Lachnospiraceae bacterium A4	Species	Bacteria		Firmicutes	Clostridia	Clostridiales	Lachnospiraceae		Lachnospiraceae bacterium A4
AGQYYVNQR	9296.08	Bacteria	Superkingdom	Bacteria
AGSDNILDVTK	8158.34	Bacteroides	Genus	Bacteria		Bacteroidetes	Bacteroidia	Bacteroidales	Bacteroidaceae	Bacteroides
AGSIPWTYAPVVDLGR	4422.44	Bacteroidales	Order	Bacteria		Bacteroidetes	Bacteroidia	Bacteroidales
AGSNILGNSPSLPVAK	1498.49	Mus musculus	Species	Eukaryota	Metazoa	Chordata	Mammalia	Rodentia	Muridae	Mus	Mus musculus
AGSSSGSGVQGASAGGLAADASR	803.26	Mus musculus	Species	Eukaryota	Metazoa	Chordata	Mammalia	Rodentia	Muridae	Mus	Mus musculus
AGSTIEALAK	33360.8	Lysobacter arseniciresistens	Species	Bacteria		Proteobacteria	Gammaproteobacteria	Xanthomonadales	Xanthomonadaceae	Lysobacter	Lysobacter arseniciresistens
AGSTLTTGQALK	6077.51	Lachnospiraceae	Family	Bacteria		Firmicutes	Clostridia	Clostridiales	Lachnospiraceae
AGTASVTIR	8124.43	Lachnospiraceae bacterium MD335	Species	Bacteria		Firmicutes	Clostridia	Clostridiales	Lachnospiraceae		Lachnospiraceae bacterium MD335
AGTATITATAK	5826.55	Firmicutes	Phylum	Bacteria		Firmicutes
AGTDAITDSMK	18593	Lactobacillus	Genus	Bacteria		Firmicutes	Bacilli	Lactobacillales	Lactobacillaceae	Lactobacillus
AGTDPELVYQAIR	11451.5	Clostridiales	Order	Bacteria		Firmicutes	Clostridia	Clostridiales
AGTFEIQDLDGNK	186320	Lachnospiraceae bacterium MD335	Species	Bacteria		Firmicutes	Clostridia	Clostridiales	Lachnospiraceae		Lachnospiraceae bacterium MD335
AGTFEIQDLDGNKIASATVQAIGAGESAVMTAK	337.635	Lachnospiraceae bacterium MD335	Species	Bacteria		Firmicutes	Clostridia	Clostridiales	Lachnospiraceae		Lachnospiraceae bacterium MD335
AGTIGGLLGK	3093.78	Clostridium bornimense	Species	Bacteria		Firmicutes	Clostridia	Clostridiales	Clostridiaceae	Clostridium	Clostridium bornimense
AGTPLFFDK	1877.29	Bacteroidetes	Phylum	Bacteria		Bacteroidetes
AGTQIENIDEDFRDGLK	2728.55	Chordata	Phylum	Eukaryota	Metazoa	Chordata
AGTTAEGISK	6445.08	Fusobacterium ulcerans	Species	Bacteria		Fusobacteria	Fusobacteriia	Fusobacteriales	Fusobacteriaceae	Fusobacterium	Fusobacterium ulcerans
AGTTAESLANLK	48502.5	Eubacterium plexicaudatum	Species	Bacteria		Firmicutes	Clostridia	Clostridiales	Eubacteriaceae	Eubacterium	Eubacterium plexicaudatum
AGTTLNMIR	6003.17	Clostridiales	Order	Bacteria		Firmicutes	Clostridia	Clostridiales
AGTTTIEVK	32769.8	Komagataeibacter	Genus	Bacteria		Proteobacteria	Alphaproteobacteria	Rhodospirillales	Acetobacteraceae	Komagataeibacter
AGTVSMDVAR	8738.77	Clostridiales	Order	Bacteria		Firmicutes	Clostridia	Clostridiales
AGTVTMDVAK	41529.1	Bacteria	Superkingdom	Bacteria
AGTVTMDVTK	338604	Bacteria	Superkingdom	Bacteria
AGTVTPDVAK	54343.2	Bacteria	Superkingdom	Bacteria
AGVDMQLPGVR	4199.55	Lachnospiraceae bacterium MD335	Species	Bacteria		Firmicutes	Clostridia	Clostridiales	Lachnospiraceae		Lachnospiraceae bacterium MD335
AGVDPNALVVEPYANPFR	1276.73	Oscillibacter sp. 1-3	Species	Bacteria		Firmicutes	Clostridia	Clostridiales	Oscillospiraceae	Oscillibacter	Oscillibacter sp. 1-3
AGVDPQLVFEAIR	6757.03	Bacteria	Superkingdom	Bacteria
AGVIFPVGR	5178.8	Eukaryota	Superkingdom	Eukaryota
AGVLAQLEEER	3658.73	Metazoa	Kingdom	Eukaryota	Metazoa
AGVNTVTTLVENK	5802.71	Metazoa	Kingdom	Eukaryota	Metazoa
AGVNTVTTLVENKK	325.924	Metazoa	Kingdom	Eukaryota	Metazoa
AGVTAEGIAK	54653.1	Oscillibacter sp. 1-3	Species	Bacteria		Firmicutes	Clostridia	Clostridiales	Oscillospiraceae	Oscillibacter	Oscillibacter sp. 1-3
AGVTAEGISK	8334.25	Clostridiales	Order	Bacteria		Firmicutes	Clostridia	Clostridiales
AGVTIPQLNSVMGR	5399.09	Mucispirillum schaedleri	Species	Bacteria		Deferribacteres	Deferribacteres	Deferribacterales	Deferribacteraceae	Mucispirillum	Mucispirillum schaedleri
AGVVEGIVYDADGMK	7201.46	Lachnospiraceae bacterium MD335	Species	Bacteria		Firmicutes	Clostridia	Clostridiales	Lachnospiraceae		Lachnospiraceae bacterium MD335
AGVVEGNFYDTEAMK	7255.91	Eubacterium plexicaudatum	Species	Bacteria		Firmicutes	Clostridia	Clostridiales	Eubacteriaceae	Eubacterium	Eubacterium plexicaudatum
AGVVEGTFYDADGIK	7499.71	Lachnospiraceae bacterium A2	Species	Bacteria		Firmicutes	Clostridia	Clostridiales	Lachnospiraceae		Lachnospiraceae bacterium A2
AGVVTMPEYLR	17164.9	Chordata	Phylum	Eukaryota	Metazoa	Chordata
AGYDNVIK	25728	Lachnospiraceae bacterium MD335	Species	Bacteria		Firmicutes	Clostridia	Clostridiales	Lachnospiraceae		Lachnospiraceae bacterium MD335
AGYENIIK	4459.21	Lachnospiraceae bacterium A4	Species	Bacteria		Firmicutes	Clostridia	Clostridiales	Lachnospiraceae		Lachnospiraceae bacterium A4
AGYEQIAALFLK	443.943	Clostridiales	Order	Bacteria		Firmicutes	Clostridia	Clostridiales
AGYIITGQWAK	4101.61	Clostridiales	Order	Bacteria		Firmicutes	Clostridia	Clostridiales
AGYQAFILR	1701.9	Clostridium sp. D5	Species	Bacteria		Firmicutes	Clostridia	Clostridiales	Clostridiaceae	Clostridium	Clostridium sp. D5
AGYTSVTSHR	3500.38	Bacteria	Superkingdom	Bacteria
AGYTTVTSHR	2586.18	Bacteria	Superkingdom	Bacteria
AGYVNTGVWAK	2413.3	Bacteria	Superkingdom	Bacteria
AGYYDQSGALR	2186.61	Bacteria	Superkingdom	Bacteria
AHFSQEGNTR	5981.81	Firmicutes	Phylum	Bacteria		Firmicutes
AIAAMPIAGSYR	13025.8	Bacteria	Superkingdom	Bacteria
AIAAMPVAGSYR	12275	Firmicutes	Phylum	Bacteria		Firmicutes
AIADAIVEATEK	6638.86	Prevotella	Genus	Bacteria		Bacteroidetes	Bacteroidia	Bacteroidales	Prevotellaceae	Prevotella
AIADDENEIKER	2915.66	Clostridiales	Order	Bacteria		Firmicutes	Clostridia	Clostridiales
AIADKEDEAA	3100.78	Lactobacillus	Genus	Bacteria		Firmicutes	Bacilli	Lactobacillales	Lactobacillaceae	Lactobacillus
AIADLGVDMLAAGIGNIHGK	5111.41	Clostridiales	Order	Bacteria		Firmicutes	Clostridia	Clostridiales
AIAEIGIYPAVDPLDSTSR	8359.86	Bacteria	Superkingdom	Bacteria
AIAEIQALR	5841.17	Alistipes indistinctus	Species	Bacteria		Bacteroidetes	Bacteroidia	Bacteroidales	Rikenellaceae	Alistipes	Alistipes indistinctus
AIAELHGK	6306.79	Paenibacillus naphthalenovorans	Species	Bacteria		Firmicutes	Bacilli	Bacillales	Paenibacillaceae	Paenibacillus	Paenibacillus naphthalenovorans
AIAEMEDGDVLVVENTR	796.859	Lactobacillus	Genus	Bacteria		Firmicutes	Bacilli	Lactobacillales	Lactobacillaceae	Lactobacillus
AIAEVTLGNLK	7701.92	Clostridium sp. MD294	Species	Bacteria		Firmicutes	Clostridia	Clostridiales	Clostridiaceae	Clostridium	Clostridium sp. MD294
AIAGDENEIKER	5356.87	Enterocloster asparagiformis	Species	Bacteria		Firmicutes	Clostridia	Clostridiales	Lachnospiraceae	Enterocloster	Enterocloster asparagiformis
AIAQAQIIMFPGGFSAGDEPDGSAK	217.256	Lachnospiraceae bacterium A4	Species	Bacteria		Firmicutes	Clostridia	Clostridiales	Lachnospiraceae		Lachnospiraceae bacterium A4
AIAQGFSFYAPIR	1325.15	Clostridium	Genus	Bacteria		Firmicutes	Clostridia	Clostridiales	Clostridiaceae	Clostridium
AIAQILLDEGYIK	6121.43	Firmicutes	Phylum	Bacteria		Firmicutes
AIASATEGGSVPQIR	1656.38	Mus musculus	Species	Eukaryota	Metazoa	Chordata	Mammalia	Rodentia	Muridae	Mus	Mus musculus
AIATDTVANMSSGPEPPFFK	615.953	Rodentia	Order	Eukaryota	Metazoa	Chordata	Mammalia	Rodentia
AIATETAADYAYLFDIIAK	74.5911	Lachnospiraceae bacterium A2	Species	Bacteria		Firmicutes	Clostridia	Clostridiales	Lachnospiraceae		Lachnospiraceae bacterium A2
AIATVISVYR	784.035	Roseburia	Genus	Bacteria		Firmicutes	Clostridia	Clostridiales	Lachnospiraceae	Roseburia
AIAVFPDGK	3438.06	Eubacterium plexicaudatum	Species	Bacteria		Firmicutes	Clostridia	Clostridiales	Eubacteriaceae	Eubacterium	Eubacterium plexicaudatum
AIDAGATAFK	51953.8	Bacteria	Superkingdom	Bacteria
AIDAGATAFKK	4480.75	Bacteria	Superkingdom	Bacteria
AIDAGATAFVK	7366.81	Bacteria	Superkingdom	Bacteria
AIDAGATAYR	20537.1	Slackia	Genus	Bacteria		Actinobacteria	Coriobacteriia	Eggerthellales	Eggerthellaceae	Slackia
AIDAGVDAVHK	26527.4	Clostridiales	Order	Bacteria		Firmicutes	Clostridia	Clostridiales
AIDIINASIR	1958.06	Lachnospiraceae bacterium MD335	Species	Bacteria		Firmicutes	Clostridia	Clostridiales	Lachnospiraceae		Lachnospiraceae bacterium MD335
AIDIITDAIAR	3287.26	Lactobacillus	Genus	Bacteria		Firmicutes	Bacilli	Lactobacillales	Lactobacillaceae	Lactobacillus
AIDKLEPFQR	5273.55	Bacteria	Superkingdom	Bacteria
AIDLDNDR	22696.1	Lachnospiraceae bacterium 10-1	Species	Bacteria		Firmicutes	Clostridia	Clostridiales	Lachnospiraceae		Lachnospiraceae bacterium 10-1
AIDLGATAFK	6053.25	Clostridiales	Order	Bacteria		Firmicutes	Clostridia	Clostridiales
AIDLMDEAGAK	1685.41	Bacteria	Superkingdom	Bacteria
AIDMIGMPGMK	10436.1	Clostridiales	Order	Bacteria		Firmicutes	Clostridia	Clostridiales
AIDTIYQTTDFSGIR	1110.37	Mammalia	Class	Eukaryota	Metazoa	Chordata	Mammalia
AIEAAGYKPGK	6431.32	Firmicutes	Phylum	Bacteria		Firmicutes
AIEDAGYKPGK	2494.13	Lactobacillus	Genus	Bacteria		Firmicutes	Bacilli	Lactobacillales	Lactobacillaceae	Lactobacillus
AIEDMMAR	34622	Clostridiales	Order	Bacteria		Firmicutes	Clostridia	Clostridiales
AIEDYIPFANLR	3348.16	Lactobacillaceae	Family	Bacteria		Firmicutes	Bacilli	Lactobacillales	Lactobacillaceae
AIEFSTLQR	163450	Clostridiales	Order	Bacteria		Firmicutes	Clostridia	Clostridiales
AIEIEQAALDR	19105	Mahella australiensis	Species	Bacteria		Firmicutes	Clostridia	Thermoanaerobacterales	Thermoanaerobacterales Family IV. Incertae Sedis	Mahella	Mahella australiensis
AIEIGMGK	494.197	Firmicutes	Phylum	Bacteria		Firmicutes
AIELEDHFENMGAK	1172.03	Lactobacillales	Order	Bacteria		Firmicutes	Bacilli	Lactobacillales
AIELSSLQR	16834.2	Clostridiales	Order	Bacteria		Firmicutes	Clostridia	Clostridiales
AIELSTLQR	80809.6	Bacteria	Superkingdom	Bacteria
AIEPITSTASSTVVK	7491.9	Lachnospiraceae bacterium MD335	Species	Bacteria		Firmicutes	Clostridia	Clostridiales	Lachnospiraceae		Lachnospiraceae bacterium MD335
AIETGLPK	4953.21	Bacteria	Superkingdom	Bacteria
AIFDDIATYGVIENR	1934.89	Lachnospiraceae bacterium A4	Species	Bacteria		Firmicutes	Clostridia	Clostridiales	Lachnospiraceae		Lachnospiraceae bacterium A4
AIFDKYPEYR	3262.86	Lachnospiraceae	Family	Bacteria		Firmicutes	Clostridia	Clostridiales	Lachnospiraceae
AIFDNADR	26328.9	Bacteria	Superkingdom	Bacteria
AIFDPIIR	3787.21	Lachnospiraceae bacterium MD335	Species	Bacteria		Firmicutes	Clostridia	Clostridiales	Lachnospiraceae		Lachnospiraceae bacterium MD335
AIFLADGNVFTTGFSR	882.708	Chordata	Phylum	Eukaryota	Metazoa	Chordata
AIFQAIAAK	1672.01	Mus musculus	Species	Eukaryota	Metazoa	Chordata	Mammalia	Rodentia	Muridae	Mus	Mus musculus
AIGAANVDVNHIK	8072.22	Lachnospiraceae bacterium M18-1	Species	Bacteria		Firmicutes	Clostridia	Clostridiales	Lachnospiraceae		Lachnospiraceae bacterium M18-1
AIGAFQNTQFQLADMATK	5356.34	Firmicutes	Phylum	Bacteria		Firmicutes
AIGAGAGNPPVVVDETANIEK	1391.91	Bacteria	Superkingdom	Bacteria
AIGIIINNPEFADVR	1290.96	Bacteria	Superkingdom	Bacteria
AIGIISDR	10455.7	Bacteria	Superkingdom	Bacteria
AIGLVIPELNK	2118.96	Bacteria	Superkingdom	Bacteria
AIGLVSEVYPPEELMPK	2900.73	Clostridiales	Order	Bacteria		Firmicutes	Clostridia	Clostridiales
AIGLVTVISK	11846.2	Rodentia	Order	Eukaryota	Metazoa	Chordata	Mammalia	Rodentia
AIGLVVPELDGK	21260	Leuconostoc	Genus	Bacteria		Firmicutes	Bacilli	Lactobacillales	Leuconostocaceae	Leuconostoc
AIGLVVPELNGK	12602.2	Bacteria	Superkingdom	Bacteria
AIGSASEGAQSSLQEVYHK	6636.07	Metazoa	Kingdom	Eukaryota	Metazoa
AIGVILAGGNNEGR	5290.94	Clostridium sp. MD294	Species	Bacteria		Firmicutes	Clostridia	Clostridiales	Clostridiaceae	Clostridium	Clostridium sp. MD294
AIGVLTSGGDAQGMNAAVR	1036.31	Chordata	Phylum	Eukaryota	Metazoa	Chordata
AIIDFEGEGVVR	11729.4	Lachnospiraceae bacterium A4	Species	Bacteria		Firmicutes	Clostridia	Clostridiales	Lachnospiraceae		Lachnospiraceae bacterium A4
AIIEAAMNVK	4607.7	Alistipes	Genus	Bacteria		Bacteroidetes	Bacteroidia	Bacteroidales	Rikenellaceae	Alistipes
AIIGLSDLK	38852.9	Lachnospiraceae bacterium MD335	Species	Bacteria		Firmicutes	Clostridia	Clostridiales	Lachnospiraceae		Lachnospiraceae bacterium MD335
AIISSGIGFPR	5483.78	Lachnospiraceae bacterium A4	Species	Bacteria		Firmicutes	Clostridia	Clostridiales	Lachnospiraceae		Lachnospiraceae bacterium A4
AIITATTTDGSNK	4077.82	Lachnospiraceae bacterium A4	Species	Bacteria		Firmicutes	Clostridia	Clostridiales	Lachnospiraceae		Lachnospiraceae bacterium A4
AIITPANVTSK	13656.9	Lachnospiraceae bacterium A4	Species	Bacteria		Firmicutes	Clostridia	Clostridiales	Lachnospiraceae		Lachnospiraceae bacterium A4
AIITPEAEKEDEVIK	14835.8	Lachnospiraceae bacterium MD335	Species	Bacteria		Firmicutes	Clostridia	Clostridiales	Lachnospiraceae		Lachnospiraceae bacterium MD335
AIIVNQSVPGTAEAFTQIK	1904.18	Oscillibacter sp. 1-3	Species	Bacteria		Firmicutes	Clostridia	Clostridiales	Oscillospiraceae	Oscillibacter	Oscillibacter sp. 1-3
AIIVNQSVPGTTEAFR	14691	Firmicutes	Phylum	Bacteria		Firmicutes
AIIVVGGGSMK	17494.1	Bacteria	Superkingdom	Bacteria
AIKVPVSSDATVK	9715.97	Lachnospiraceae bacterium MD335	Species	Bacteria		Firmicutes	Clostridia	Clostridiales	Lachnospiraceae		Lachnospiraceae bacterium MD335
AILDNANVSGK	13752.3	Lactobacillus	Genus	Bacteria		Firmicutes	Bacilli	Lactobacillales	Lactobacillaceae	Lactobacillus
AILESGSSNAPWAVK	2392.72	Muridae	Family	Eukaryota	Metazoa	Chordata	Mammalia	Rodentia	Muridae
AILLTAQELNSPVILGVSEGAGK	616.658	Clostridiales	Order	Bacteria		Firmicutes	Clostridia	Clostridiales
AILPFFPK	12117.2	Mammalia	Class	Eukaryota	Metazoa	Chordata	Mammalia
AILQTAQELNSPVILGVSEGAGK	20636	Firmicutes	Phylum	Bacteria		Firmicutes
AILVDLEPGTMDSVR	943.872	Eukaryota	Superkingdom	Eukaryota
AILVLGGGSMK	1903.89	Clostridiales	Order	Bacteria		Firmicutes	Clostridia	Clostridiales
AIMNLDVEQYR	10938.9	Metazoa	Kingdom	Eukaryota	Metazoa
AIMTTDTVNK	9839.82	Firmicutes	Phylum	Bacteria		Firmicutes
AINEIRPLAAEVDLIPR	3653.97	Clostridiales	Order	Bacteria		Firmicutes	Clostridia	Clostridiales
AINLLEVDDEHAAK	6765.97	Anaerotruncus sp. G3(2012)	Species	Bacteria		Firmicutes	Clostridia	Clostridiales	Ruminococcaceae	Anaerotruncus	Anaerotruncus sp. G3(2012)
AINQGGLTSVAVR	19302.7	Metazoa	Kingdom	Eukaryota	Metazoa
AINVTPVMYATAGTYNFATLK	190.88	Lachnospiraceae bacterium MD335	Species	Bacteria		Firmicutes	Clostridia	Clostridiales	Lachnospiraceae		Lachnospiraceae bacterium MD335
AIPIVGQVLER	5056.6	Mus musculus	Species	Eukaryota	Metazoa	Chordata	Mammalia	Rodentia	Muridae	Mus	Mus musculus
AIQDGDFFENK	5173.53	Firmicutes	Phylum	Bacteria		Firmicutes
AIQEEIIKK	5713.2	Lactobacillus	Genus	Bacteria		Firmicutes	Bacilli	Lactobacillales	Lactobacillaceae	Lactobacillus
AIQESDLGINPQNDGK	4024.42	Firmicutes	Phylum	Bacteria		Firmicutes
AIQGDQWGEK	42036.9	Lachnospiraceae bacterium A4	Species	Bacteria		Firmicutes	Clostridia	Clostridiales	Lachnospiraceae		Lachnospiraceae bacterium A4
AIQNSDLGINPQNDGK	2701.62	Oscillibacter	Genus	Bacteria		Firmicutes	Clostridia	Clostridiales	Oscillospiraceae	Oscillibacter
AIQTIDNMSFINK	1526.71	Lachnospiraceae	Family	Bacteria		Firmicutes	Clostridia	Clostridiales	Lachnospiraceae
AIQTSDLGINPTNDGK	5195.02	Clostridiales	Order	Bacteria		Firmicutes	Clostridia	Clostridiales
AIRPVTESDAEK	1082.09	Bacteroidales	Order	Bacteria		Bacteroidetes	Bacteroidia	Bacteroidales
AISDDLTNK	5490.35	Mucispirillum schaedleri	Species	Bacteria		Deferribacteres	Deferribacteres	Deferribacterales	Deferribacteraceae	Mucispirillum	Mucispirillum schaedleri
AISESGVAFIPGMFTK	3900.65	Muridae	Family	Eukaryota	Metazoa	Chordata	Mammalia	Rodentia	Muridae
AISETASEQAEAMK	2895.39	Lachnospiraceae bacterium A4	Species	Bacteria		Firmicutes	Clostridia	Clostridiales	Lachnospiraceae		Lachnospiraceae bacterium A4
AISQLFGDK	20469.8	Alistipes	Genus	Bacteria		Bacteroidetes	Bacteroidia	Bacteroidales	Rikenellaceae	Alistipes
AISQLFGDR	4967.79	Alistipes putredinis	Species	Bacteria		Bacteroidetes	Bacteroidia	Bacteroidales	Rikenellaceae	Alistipes	Alistipes putredinis
AISQSGMALSPWAIQK	4431.02	Mus musculus	Species	Eukaryota	Metazoa	Chordata	Mammalia	Rodentia	Muridae	Mus	Mus musculus
AITDGEKPVTELGVK	3017.47	Lactobacillus murinus	Species	Bacteria		Firmicutes	Bacilli	Lactobacillales	Lactobacillaceae	Lactobacillus	Lactobacillus murinus
AITDYAQEK	9180.87	Bacteria	Superkingdom	Bacteria
AITDYHNVK	5216.92	Lachnospiraceae bacterium MD335	Species	Bacteria		Firmicutes	Clostridia	Clostridiales	Lachnospiraceae		Lachnospiraceae bacterium MD335
AITELAESLFEK	2383.66	Lactobacillus reuteri	Species	Bacteria		Firmicutes	Bacilli	Lactobacillales	Lactobacillaceae	Lactobacillus	Lactobacillus reuteri
AITPGVVVETGSR	5517.98	Eubacterium plexicaudatum	Species	Bacteria		Firmicutes	Clostridia	Clostridiales	Eubacteriaceae	Eubacterium	Eubacterium plexicaudatum
AIVAGDQNVEYK	10761.7	Chordata	Phylum	Eukaryota	Metazoa	Chordata
AIVAIENPADVSVISSR	1847.85	Metazoa	Kingdom	Eukaryota	Metazoa
AIVDNGEYLESAAGYAK	2136.65	Alistipes sp. CHKCI003	Species	Bacteria		Bacteroidetes	Bacteroidia	Bacteroidales	Rikenellaceae	Alistipes	Alistipes sp. CHKCI003
AIVEGINIVSK	4915.65	Prevotella rara	Species	Bacteria		Bacteroidetes	Bacteroidia	Bacteroidales	Prevotellaceae	Prevotella	Prevotella rara
AIVEGINMVTK	31642.5	Bacteroidetes	Phylum	Bacteria		Bacteroidetes
AIVEGVNMVTK	18364.4	Bacteroidetes	Phylum	Bacteria		Bacteroidetes
AIVGGTTAEK	20253.5	Anaerotruncus sp. G3(2012)	Species	Bacteria		Firmicutes	Clostridia	Clostridiales	Ruminococcaceae	Anaerotruncus	Anaerotruncus sp. G3(2012)
AIVGLSDLK	81353.9	Firmicutes	Phylum	Bacteria		Firmicutes
AIVGLSELK	4544.97	Dorea sp. 5-2	Species	Bacteria		Firmicutes	Clostridia	Clostridiales	Lachnospiraceae	Dorea	Dorea sp. 5-2
AIVNAILDGEVDK	1748.26	Mucispirillum schaedleri	Species	Bacteria		Deferribacteres	Deferribacteres	Deferribacterales	Deferribacteraceae	Mucispirillum	Mucispirillum schaedleri
AIVNDVFEK	103496	Clostridiales	Order	Bacteria		Firmicutes	Clostridia	Clostridiales
AIVNQPFAVTK	5294.05	Lactobacillus reuteri	Species	Bacteria		Firmicutes	Bacilli	Lactobacillales	Lactobacillaceae	Lactobacillus	Lactobacillus reuteri
AIVQLTEDSK	27244.9	Bacteria	Superkingdom	Bacteria
AIVRDPQVFLLDEPLSNLDAK	2142.4	Bacteria	Superkingdom	Bacteria
AIVREPQVFLMDEPLSNLDAK	804.817	Bacteria	Superkingdom	Bacteria
AIVTLTEDSNDIK	3810.81	Lactobacillus	Genus	Bacteria		Firmicutes	Bacilli	Lactobacillales	Lactobacillaceae	Lactobacillus
AIVVNQAVPGTTEAFR	2252.06	Candidatus Vecturithrix granuli	Species	Bacteria						Candidatus Vecturithrix	Candidatus Vecturithrix granuli
AIWNVINWENVTER	3654.31	Chordata	Phylum	Eukaryota	Metazoa	Chordata
AIYDNIEFIGEDK	1391.1	Lachnospiraceae bacterium MD335	Species	Bacteria		Firmicutes	Clostridia	Clostridiales	Lachnospiraceae		Lachnospiraceae bacterium MD335
AIYEAVLR	101138	Chordata	Phylum	Eukaryota	Metazoa	Chordata
AIYLNMPTEALYEEAIK	480.4	Mucispirillum schaedleri	Species	Bacteria		Deferribacteres	Deferribacteres	Deferribacterales	Deferribacteraceae	Mucispirillum	Mucispirillum schaedleri
AKENFETAIK	4086.23	Firmicutes	Phylum	Bacteria		Firmicutes
AKEVAPLAEK	6735.45	Ruminococcaceae	Family	Bacteria		Firmicutes	Clostridia	Clostridiales	Ruminococcaceae
AKEVAPVAEK	7572.33	Firmicutes	Phylum	Bacteria		Firmicutes
AKLEGEGAK	8794.7	Bacteria	Superkingdom	Bacteria
ALAAAGYDVEK	23211.8	Metazoa	Kingdom	Eukaryota	Metazoa
ALAAAGYDVEKNNSR	388.204	Metazoa	Kingdom	Eukaryota	Metazoa
ALAAGGYDVEK	6541.29	Chordata	Phylum	Eukaryota	Metazoa	Chordata
ALADAGSTSSVTVSGK	2407.52	Clostridium sp. MD294	Species	Bacteria		Firmicutes	Clostridia	Clostridiales	Clostridiaceae	Clostridium	Clostridium sp. MD294
ALADTEATTIIGGGDSAAAVNQLGYGDK	1674.91	Dorea sp. 5-2	Species	Bacteria		Firmicutes	Clostridia	Clostridiales	Lachnospiraceae	Dorea	Dorea sp. 5-2
ALAEEGTEITLTATPDNR	1515.65	Lachnospiraceae bacterium MD335	Species	Bacteria		Firmicutes	Clostridia	Clostridiales	Lachnospiraceae		Lachnospiraceae bacterium MD335
ALAEQFQEK	15496.3	Lachnospiraceae bacterium A4	Species	Bacteria		Firmicutes	Clostridia	Clostridiales	Lachnospiraceae		Lachnospiraceae bacterium A4
ALAETDATTIIGGGDSAAAVNQLGFADK	5125.61	Firmicutes	Phylum	Bacteria		Firmicutes
ALAETDATTIIGGGDSAAAVNQLGFGDK	3924.28	Clostridiales	Order	Bacteria		Firmicutes	Clostridia	Clostridiales
ALAETDATTIIGGGDSAAAVNTLGFGDK	2979.27	Clostridiales	Order	Bacteria		Firmicutes	Clostridia	Clostridiales
ALAETEATTIIGGGDSAAAVNQLGFADK	7832.23	Lachnospiraceae bacterium A4	Species	Bacteria		Firmicutes	Clostridia	Clostridiales	Lachnospiraceae		Lachnospiraceae bacterium A4
ALAEYLFDDENMMTR	2032.37	Bacteroidales	Order	Bacteria		Bacteroidetes	Bacteroidia	Bacteroidales
ALAEYLFDDETMMTR	1153.85	Bacteria	Superkingdom	Bacteria
ALAGNLEK	12459.7	Actinobacteria bacterium IMCC26256	Species	Bacteria		Actinobacteria	Actinobacteria				Actinobacteria bacterium IMCC26256
ALALPIQDK	22849.5	Clostridium	Genus	Bacteria		Firmicutes	Clostridia	Clostridiales	Clostridiaceae	Clostridium
ALAMENMEANAGQQK	1434.6	Blautia hydrogenotrophica	Species	Bacteria		Firmicutes	Clostridia	Clostridiales	Lachnospiraceae	Blautia	Blautia hydrogenotrophica
ALANVATVLAR	6678.1	Rodentia	Order	Eukaryota	Metazoa	Chordata	Mammalia	Rodentia
ALAPEYAK	8194.37	Metazoa	Kingdom	Eukaryota	Metazoa
ALASLMTYK	2810.03	Metazoa	Kingdom	Eukaryota	Metazoa
ALAVATAVK	2288.54	Alistipes	Genus	Bacteria		Bacteroidetes	Bacteroidia	Bacteroidales	Rikenellaceae	Alistipes
ALAYALAIGGAR	1945.37	Firmicutes	Phylum	Bacteria		Firmicutes
ALDEAIAFVK	15931	Firmicutes	Phylum	Bacteria		Firmicutes
ALDFIASK	5173.07	Metazoa	Kingdom	Eukaryota	Metazoa
ALDIADIPWAGR	10909.6	Bacteroides	Genus	Bacteria		Bacteroidetes	Bacteroidia	Bacteroidales	Bacteroidaceae	Bacteroides
ALDIAENEMPGLMR	6399.28	Mammalia	Class	Eukaryota	Metazoa	Chordata	Mammalia
ALDMVYER	7950.77	Lachnospiraceae bacterium A4	Species	Bacteria		Firmicutes	Clostridia	Clostridiales	Lachnospiraceae		Lachnospiraceae bacterium A4
ALDNVTPQVEVK	6980.06	Bacteria	Superkingdom	Bacteria
ALDTVLFGPPLLTR	2099.97	Chordata	Phylum	Eukaryota	Metazoa	Chordata
ALEAANADLEVK	2079.1	Rodentia	Order	Eukaryota	Metazoa	Chordata	Mammalia	Rodentia
ALEAGVNSLADTVK	2009.4	Oscillibacter	Genus	Bacteria		Firmicutes	Clostridia	Clostridiales	Oscillospiraceae	Oscillibacter
ALEDPAGEWGDK	58135.4	Eubacterium	Genus	Bacteria		Firmicutes	Clostridia	Clostridiales	Eubacteriaceae	Eubacterium
ALEDPASEWGDK	17483.9	Clostridiales	Order	Bacteria		Firmicutes	Clostridia	Clostridiales
ALEDPDSEWGDK	16289.7	Firmicutes	Phylum	Bacteria		Firmicutes
ALEDPMGEWGDK	5465	Clostridiales	Order	Bacteria		Firmicutes	Clostridia	Clostridiales
ALEDPNGEWGDK	56544.4	Clostridiales	Order	Bacteria		Firmicutes	Clostridia	Clostridiales
ALEDPNSEWGDK	61767.8	Clostridiales	Order	Bacteria		Firmicutes	Clostridia	Clostridiales
ALEDPQSEWGDK	7491.89	Bacteria	Superkingdom	Bacteria
ALEDPSGEWGDK	121277	Clostridiales	Order	Bacteria		Firmicutes	Clostridia	Clostridiales
ALEDPSSEWGDK	209096	Firmicutes	Phylum	Bacteria		Firmicutes
ALEEAMEQK	6495.36	Chordata	Phylum	Eukaryota	Metazoa	Chordata
ALEEAMEQKAELER	1829.61	Chordata	Phylum	Eukaryota	Metazoa	Chordata
ALEEANADLEVK	10048.2	Chordata	Phylum	Eukaryota	Metazoa	Chordata
ALEEANTELEVK	1710.6	Chordata	Phylum	Eukaryota	Metazoa	Chordata
ALEEELEERPR	9990.25	Rodentia	Order	Eukaryota	Metazoa	Chordata	Mammalia	Rodentia
ALEESNYELEGK	117753	Mammalia	Class	Eukaryota	Metazoa	Chordata	Mammalia
ALEESYTGR	10522.2	Clostridium	Genus	Bacteria		Firmicutes	Clostridia	Clostridiales	Clostridiaceae	Clostridium
ALEESYTGRK	2515.3	Clostridium	Genus	Bacteria		Firmicutes	Clostridia	Clostridiales	Clostridiaceae	Clostridium
ALEGDPEQEK	10649.6	Lactobacillales	Order	Bacteria		Firmicutes	Bacilli	Lactobacillales
ALEGDPEQQDVIR	3202.99	Lactobacillus johnsonii	Species	Bacteria		Firmicutes	Bacilli	Lactobacillales	Lactobacillaceae	Lactobacillus	Lactobacillus johnsonii
ALEGDPEQQDVIRK	4228.86	Lactobacillus johnsonii	Species	Bacteria		Firmicutes	Bacilli	Lactobacillales	Lactobacillaceae	Lactobacillus	Lactobacillus johnsonii
ALELDPNLYR	2749.09	Metazoa	Kingdom	Eukaryota	Metazoa
ALELDSNLYR	9369.8	Chordata	Phylum	Eukaryota	Metazoa	Chordata
ALELGDTIK	26902	Rhodobacteraceae bacterium HLUCCO07	Species	Bacteria		Proteobacteria	Alphaproteobacteria	Rhodobacterales	Rhodobacteraceae		Rhodobacteraceae bacterium HLUCCO07
ALELPFEENDAMQYAAVR	1701.69	Lachnospiraceae bacterium MD335	Species	Bacteria		Firmicutes	Clostridia	Clostridiales	Lachnospiraceae		Lachnospiraceae bacterium MD335
ALEMKPQESQAAQQPVFDYMVAK	6422.74	Anaerotruncus sp. G3(2012)	Species	Bacteria		Firmicutes	Clostridia	Clostridiales	Ruminococcaceae	Anaerotruncus	Anaerotruncus sp. G3(2012)
ALENITPQVEVK	17705.5	Bacteria	Superkingdom	Bacteria
ALENVTPQVEVK	47747.3	Bacteroidetes	Phylum	Bacteria		Bacteroidetes
ALENVVGAR	77808.8	Mus musculus	Species	Eukaryota	Metazoa	Chordata	Mammalia	Rodentia	Muridae	Mus	Mus musculus
ALEQANGELEVK	22421.6	Mammalia	Class	Eukaryota	Metazoa	Chordata	Mammalia
ALEQEIEEIVSR	4300.78	Anaerotruncus sp. G3(2012)	Species	Bacteria		Firmicutes	Clostridia	Clostridiales	Ruminococcaceae	Anaerotruncus	Anaerotruncus sp. G3(2012)
ALEQFENEKR	3083.5	Lachnospiraceae bacterium A4	Species	Bacteria		Firmicutes	Clostridia	Clostridiales	Lachnospiraceae		Lachnospiraceae bacterium A4
ALEQGADVVITGR	2683.9	Clostridiales	Order	Bacteria		Firmicutes	Clostridia	Clostridiales
ALEQQVEEMK	3054.86	Chordata	Phylum	Eukaryota	Metazoa	Chordata
ALESGDMTTVWK	1780.2	Mus musculus	Species	Eukaryota	Metazoa	Chordata	Mammalia	Rodentia	Muridae	Mus	Mus musculus
ALESGVNQLADTVR	12821.3	Clostridiales	Order	Bacteria		Firmicutes	Clostridia	Clostridiales
ALESGVNQLANTVR	4168.44	Hungatella hathewayi	Species	Bacteria		Firmicutes	Clostridia	Clostridiales	Clostridiaceae	Hungatella	Hungatella hathewayi
ALESTWITGR	28052.9	Alistipes	Genus	Bacteria		Bacteroidetes	Bacteroidia	Bacteroidales	Rikenellaceae	Alistipes
ALETGVNTLADTVK	3848.55	Oscillibacter	Genus	Bacteria		Firmicutes	Clostridia	Clostridiales	Oscillospiraceae	Oscillibacter
ALETLDAK	13995.2	Lachnospiraceae bacterium A4	Species	Bacteria		Firmicutes	Clostridia	Clostridiales	Lachnospiraceae		Lachnospiraceae bacterium A4
ALETPYEENPALLYAAVR	492.521	Clostridium	Genus	Bacteria		Firmicutes	Clostridia	Clostridiales	Clostridiaceae	Clostridium
ALFEGLGR	4055.41	Clostridiales	Order	Bacteria		Firmicutes	Clostridia	Clostridiales
ALFMPNGNWVIGEMAEAPR	962.97	Lachnospiraceae bacterium 1_4_56FAA	Species	Bacteria		Firmicutes	Clostridia	Clostridiales	Lachnospiraceae		Lachnospiraceae bacterium 1_4_56FAA
ALGAEIDR	8583.42	Bacteria	Superkingdom	Bacteria
ALGEAYFLR	39935.8	Bacteroides	Genus	Bacteria		Bacteroidetes	Bacteroidia	Bacteroidales	Bacteroidaceae	Bacteroides
ALGEVGDKIDANEK	2255.2	Coprococcus	Genus	Bacteria		Firmicutes	Clostridia	Clostridiales	Lachnospiraceae	Coprococcus
ALGISPAAMGYAK	7511.63	Clostridiales	Order	Bacteria		Firmicutes	Clostridia	Clostridiales
ALGLEPAYLGYDK	4185.99	Firmicutes	Phylum	Bacteria		Firmicutes
ALGLEPSFLGYDK	3057.49	Firmicutes	Phylum	Bacteria		Firmicutes
ALGLGDEK	5782.53	Bacteroidales	Order	Bacteria		Bacteroidetes	Bacteroidia	Bacteroidales
ALGLSNFNSR	4786.43	Chordata	Phylum	Eukaryota	Metazoa	Chordata
ALGMTPAAFSALPR	8840.23	Mammalia	Class	Eukaryota	Metazoa	Chordata	Mammalia
ALGNNLINLTAYQEVK	712.803	Lachnospiraceae bacterium A2	Species	Bacteria		Firmicutes	Clostridia	Clostridiales	Lachnospiraceae		Lachnospiraceae bacterium A2
ALGQNPTNAEVLK	14733.6	Metazoa	Kingdom	Eukaryota	Metazoa
ALGSAYVAMNSK	4909.73	Lachnospiraceae bacterium A4	Species	Bacteria		Firmicutes	Clostridia	Clostridiales	Lachnospiraceae		Lachnospiraceae bacterium A4
ALGTANTDWQK	13139	Bacteroidales	Order	Bacteria		Bacteroidetes	Bacteroidia	Bacteroidales
ALGVGTNEEILELFGDEPK	652.231	Roseburia	Genus	Bacteria		Firmicutes	Clostridia	Clostridiales	Lachnospiraceae	Roseburia
ALGYIEEGYAFSPMFK	4498.66	Lachnospiraceae bacterium A4	Species	Bacteria		Firmicutes	Clostridia	Clostridiales	Lachnospiraceae		Lachnospiraceae bacterium A4
ALGYSFDWSK	3259.16	Lachnospiraceae bacterium MD335	Species	Bacteria		Firmicutes	Clostridia	Clostridiales	Lachnospiraceae		Lachnospiraceae bacterium MD335
ALIDDVEILVVR	744.248	Mus musculus	Species	Eukaryota	Metazoa	Chordata	Mammalia	Rodentia	Muridae	Mus	Mus musculus
ALIDTDFYK	5836.56	Clostridiales	Order	Bacteria		Firmicutes	Clostridia	Clostridiales
ALIEAELEAQK	17255.6	Bacteria	Superkingdom	Bacteria
ALIEAELEQQK	11824.2	Bacteria	Superkingdom	Bacteria
ALIEAELEQQKR	16538.1	Bacteroidales	Order	Bacteria		Bacteroidetes	Bacteroidia	Bacteroidales
ALIEAGADAVK	40018.5	Bacteria	Superkingdom	Bacteria
ALIELDGTPNK	2906.24	Bacteria	Superkingdom	Bacteria
ALIFPYPNNPTGGIMEK	2497.63	Clostridium sp. MD294	Species	Bacteria		Firmicutes	Clostridia	Clostridiales	Clostridiaceae	Clostridium	Clostridium sp. MD294
ALILFENPEDALK	1976.16	Lactobacillus	Genus	Bacteria		Firmicutes	Bacilli	Lactobacillales	Lactobacillaceae	Lactobacillus
ALILFETPQDALK	3005.09	Lactobacillus	Genus	Bacteria		Firmicutes	Bacilli	Lactobacillales	Lactobacillaceae	Lactobacillus
ALKPPVTVYDGK	1878.82	Lachnospiraceae bacterium A4	Species	Bacteria		Firmicutes	Clostridia	Clostridiales	Lachnospiraceae		Lachnospiraceae bacterium A4
ALLAVDPDFR	3855.94	Lactobacillales	Order	Bacteria		Firmicutes	Bacilli	Lactobacillales
ALLDFEDK	3103.61	Mammalia	Class	Eukaryota	Metazoa	Chordata	Mammalia
ALLDNSYK	10884.3	Eubacterium sp. 14-2	Species	Bacteria		Firmicutes	Clostridia	Clostridiales	Eubacteriaceae	Eubacterium	Eubacterium sp. 14-2
ALLEADPEYR	6494.59	Bacilli	Class	Bacteria		Firmicutes	Bacilli
ALLEPTETLR	34952.9	Enterobacterales	Order	Bacteria		Proteobacteria	Gammaproteobacteria	Enterobacterales
ALLEVDPDFR	14498.3	Bacteria	Superkingdom	Bacteria
ALLEVVQSGGK	27483.7	Eukaryota	Superkingdom	Eukaryota
ALLEYFQPVSQWLEEQNQR	91.3119	Mus musculus	Species	Eukaryota	Metazoa	Chordata	Mammalia	Rodentia	Muridae	Mus	Mus musculus
ALLLIGEPGTAK	13983	Bacteria	Superkingdom	Bacteria
ALLPLTDVLEMTVPGESVK	504.315	Lachnospiraceae	Family	Bacteria		Firmicutes	Clostridia	Clostridiales	Lachnospiraceae
ALLSAPWYLNR	2719.12	Eukaryota	Superkingdom	Eukaryota
ALLSPTFTSGR	3191.87	Muridae	Family	Eukaryota	Metazoa	Chordata	Mammalia	Rodentia	Muridae
ALLTESLDIFK	13122	Firmicutes	Phylum	Bacteria		Firmicutes
ALLVPDTAK	10577.4	Lachnospiraceae bacterium A4	Species	Bacteria		Firmicutes	Clostridia	Clostridiales	Lachnospiraceae		Lachnospiraceae bacterium A4
ALLVPSGDVQEDAAEESVEE	1461.59	Lachnospiraceae bacterium A2	Species	Bacteria		Firmicutes	Clostridia	Clostridiales	Lachnospiraceae		Lachnospiraceae bacterium A2
ALLYETTR	11711.3	Bacteroidia	Class	Bacteria		Bacteroidetes	Bacteroidia
ALMDNSYK	4954.4	Lachnospiraceae	Family	Bacteria		Firmicutes	Clostridia	Clostridiales	Lachnospiraceae
ALMVYDLIR	24807.8	Firmicutes	Phylum	Bacteria		Firmicutes
ALNALNEDVLK	2998.94	Clostridium	Genus	Bacteria		Firmicutes	Clostridia	Clostridiales	Clostridiaceae	Clostridium
ALNALNSTVLEELDK	1812.96	Lachnospiraceae bacterium 28-4	Species	Bacteria		Firmicutes	Clostridia	Clostridiales	Lachnospiraceae		Lachnospiraceae bacterium 28-4
ALNDLAPIK	88076.7	Firmicutes	Phylum	Bacteria		Firmicutes
ALNDLATIK	138775	Lachnospiraceae bacterium JC7	Species	Bacteria		Firmicutes	Clostridia	Clostridiales	Lachnospiraceae		Lachnospiraceae bacterium JC7
ALNENDAEDGTEIK	1201.56	Firmicutes	Phylum	Bacteria		Firmicutes
ALNETDGNMDEAVEYLR	2731.87	Dorea sp. D27	Species	Bacteria		Firmicutes	Clostridia	Clostridiales	Lachnospiraceae	Dorea	Dorea sp. D27
ALNETDGNMDEAVEYLRK	2352.06	Dorea sp. D27	Species	Bacteria		Firmicutes	Clostridia	Clostridiales	Lachnospiraceae	Dorea	Dorea sp. D27
ALNEVGDKIDASEK	23035.2	Lachnospiraceae	Family	Bacteria		Firmicutes	Clostridia	Clostridiales	Lachnospiraceae
ALNLSPAAMGYAK	9322.18	Firmicutes	Phylum	Bacteria		Firmicutes
ALNPDAPVAR	11171.9	Bacteroidales	Order	Bacteria		Bacteroidetes	Bacteroidia	Bacteroidales
ALNPENPVAR	9383.84	Bacteria	Superkingdom	Bacteria
ALNTLLATAMDFGTSK	1443.64	Lachnospiraceae bacterium A4	Species	Bacteria		Firmicutes	Clostridia	Clostridiales	Lachnospiraceae		Lachnospiraceae bacterium A4
ALPLYGLR	23206.5	Clostridium magnum	Species	Bacteria		Firmicutes	Clostridia	Clostridiales	Clostridiaceae	Clostridium	Clostridium magnum
ALPWSPAQINTR	438880	Muridae	Family	Eukaryota	Metazoa	Chordata	Mammalia	Rodentia	Muridae
ALQAAGLDVSMIK	1265.14	Firmicutes	Phylum	Bacteria		Firmicutes
ALQAAGLDVTLIK	922.354	Firmicutes	Phylum	Bacteria		Firmicutes
ALQATVGNSYK	15757.4	Mammalia	Class	Eukaryota	Metazoa	Chordata	Mammalia
ALQAVGLEVTMIK	2322.91	Firmicutes	Phylum	Bacteria		Firmicutes
ALQDEINR	55132.7	Proteobacteria	Phylum	Bacteria		Proteobacteria
ALQEFVDEMSNWYVR	475.607	Clostridiales	Order	Bacteria		Firmicutes	Clostridia	Clostridiales
ALQEKPAADKK	554.807	Lactobacillus	Genus	Bacteria		Firmicutes	Bacilli	Lactobacillales	Lactobacillaceae	Lactobacillus
ALQGMFR	3182.93	Bacteria	Superkingdom	Bacteria
ALQGVDFTLR	9703.81	Clostridium	Genus	Bacteria		Firmicutes	Clostridia	Clostridiales	Clostridiaceae	Clostridium
ALQLEEER	21891.7	Eukaryota	Superkingdom	Eukaryota
ALQMFGGYGYTK	7408.72	Clostridiales	Order	Bacteria		Firmicutes	Clostridia	Clostridiales
ALQPLEEGEGEEK	4241.82	Mammalia	Class	Eukaryota	Metazoa	Chordata	Mammalia
ALQSLATK	2942.54	Bacteroidales	Order	Bacteria		Bacteroidetes	Bacteroidia	Bacteroidales
ALQSVDNAFGMLMEGLK	300.597	Mus musculus	Species	Eukaryota	Metazoa	Chordata	Mammalia	Rodentia	Muridae	Mus	Mus musculus
ALRDQGATVSAK	27421.6	Lachnospiraceae bacterium MD335	Species	Bacteria		Firmicutes	Clostridia	Clostridiales	Lachnospiraceae		Lachnospiraceae bacterium MD335
ALRDQGVSVSAK	7678.97	Lachnospiraceae bacterium MD335	Species	Bacteria		Firmicutes	Clostridia	Clostridiales	Lachnospiraceae		Lachnospiraceae bacterium MD335
ALSAIAELLTSEHER	480.877	Mus musculus	Species	Eukaryota	Metazoa	Chordata	Mammalia	Rodentia	Muridae	Mus	Mus musculus
ALSDALTELGYK	2701	Muridae	Family	Eukaryota	Metazoa	Chordata	Mammalia	Rodentia	Muridae
ALSEIAGITLPYDTLDQVR	367.453	Mammalia	Class	Eukaryota	Metazoa	Chordata	Mammalia
ALSGIEPFQK	5370.13	Clostridium sp. MD294	Species	Bacteria		Firmicutes	Clostridia	Clostridiales	Clostridiaceae	Clostridium	Clostridium sp. MD294
ALSGPININADHSDSMGAR	3896.59	Clostridia	Class	Bacteria		Firmicutes	Clostridia
ALSQPDTVLR	3814.49	Mus musculus	Species	Eukaryota	Metazoa	Chordata	Mammalia	Rodentia	Muridae	Mus	Mus musculus
ALSTPTEPVQR	4074.51	Mus	Genus	Eukaryota	Metazoa	Chordata	Mammalia	Rodentia	Muridae	Mus
ALTAFTEVVAK	31670.7	Lachnospiraceae bacterium A4	Species	Bacteria		Firmicutes	Clostridia	Clostridiales	Lachnospiraceae		Lachnospiraceae bacterium A4
ALTDAGMEVEQLDLQR	15461.9	Clostridiales	Order	Bacteria		Firmicutes	Clostridia	Clostridiales
ALTDAGVEVEQLNLTR	4359.46	Oscillibacter sp. 1-3	Species	Bacteria		Firmicutes	Clostridia	Clostridiales	Oscillospiraceae	Oscillibacter	Oscillibacter sp. 1-3
ALTDEIDR	32461	Comamonas testosteroni	Species	Bacteria		Proteobacteria	Betaproteobacteria	Burkholderiales	Comamonadaceae	Comamonas	Comamonas testosteroni
ALTDELAALGR	4953.13	Rodentia	Order	Eukaryota	Metazoa	Chordata	Mammalia	Rodentia
ALTDIDVAPESR	13501.4	Lachnospiraceae bacterium MD335	Species	Bacteria		Firmicutes	Clostridia	Clostridiales	Lachnospiraceae		Lachnospiraceae bacterium MD335
ALTEVGDKIDANEK	2378.33	Lachnospiraceae bacterium MD335	Species	Bacteria		Firmicutes	Clostridia	Clostridiales	Lachnospiraceae		Lachnospiraceae bacterium MD335
ALTQDDGVAK	6525.85	Mus musculus	Species	Eukaryota	Metazoa	Chordata	Mammalia	Rodentia	Muridae	Mus	Mus musculus
ALTQPLGLLR	1284.58	Mammalia	Class	Eukaryota	Metazoa	Chordata	Mammalia
ALTSAYAGR	14967.8	Firmicutes	Phylum	Bacteria		Firmicutes
ALTTMGFR	2942.78	Metazoa	Kingdom	Eukaryota	Metazoa
ALTTQLTDAELAQGR	2412.89	Mus musculus	Species	Eukaryota	Metazoa	Chordata	Mammalia	Rodentia	Muridae	Mus	Mus musculus
ALTVPELTQQMFDAK	9415.85	Eukaryota	Superkingdom	Eukaryota
ALTVPELTQQVFDAK	1812.7	Eukaryota	Superkingdom	Eukaryota
ALVAAGPQK	2382.71	Firmicutes	Phylum	Bacteria		Firmicutes
ALVADSHPESER	692.001	Mammalia	Class	Eukaryota	Metazoa	Chordata	Mammalia
ALVAYYQK	11337.7	Eukaryota	Superkingdom	Eukaryota
ALVDNPDEVVVTEK	7936.84	Firmicutes	Phylum	Bacteria		Firmicutes
ALVEEALAQR	3271.73	Mammalia	Class	Eukaryota	Metazoa	Chordata	Mammalia
ALVGNYEGTASR	21610.2	Firmicutes	Phylum	Bacteria		Firmicutes
ALVGSENPPLTVIR	1540.17	Rodentia	Order	Eukaryota	Metazoa	Chordata	Mammalia	Rodentia
ALVILNDNDQNVVLSAR	541.731	Firmicutes	Phylum	Bacteria		Firmicutes
ALVINTNPVEVYK	1042.68	Mus musculus	Species	Eukaryota	Metazoa	Chordata	Mammalia	Rodentia	Muridae	Mus	Mus musculus
ALVLADITANK	6638.94	Maribacter	Genus	Bacteria		Bacteroidetes	Flavobacteriia	Flavobacteriales	Flavobacteriaceae	Maribacter
ALVSEDDIPINK	20393.3	Mus musculus	Species	Eukaryota	Metazoa	Chordata	Mammalia	Rodentia	Muridae	Mus	Mus musculus
ALVVLADNDEK	3772.53	Firmicutes	Phylum	Bacteria		Firmicutes
ALVVTGVIDR	8034.19	Lachnospiraceae bacterium 28-4	Species	Bacteria		Firmicutes	Clostridia	Clostridiales	Lachnospiraceae		Lachnospiraceae bacterium 28-4
ALWANMLEPLGK	12431.1	Muridae	Family	Eukaryota	Metazoa	Chordata	Mammalia	Rodentia	Muridae
ALWEDEGVR	2007.26	Metazoa	Kingdom	Eukaryota	Metazoa
ALWEDSGIQNAYDR	967.473	Chordata	Phylum	Eukaryota	Metazoa	Chordata
ALYAVFSR	2286.89	Rodentia	Order	Eukaryota	Metazoa	Chordata	Mammalia	Rodentia
ALYEALEGNPVTIR	155862	Clostridiales	Order	Bacteria		Firmicutes	Clostridia	Clostridiales
ALYETELADAR	1714.97	Chordata	Phylum	Eukaryota	Metazoa	Chordata
ALYFTQSMK	5519.34	Desulfovibrionales	Order	Bacteria		Proteobacteria	Deltaproteobacteria	Desulfovibrionales
ALYGTTSETATWR	33576	Mammalia	Class	Eukaryota	Metazoa	Chordata	Mammalia
ALYIEDLIK	7056.7	Lachnospiraceae bacterium A4	Species	Bacteria		Firmicutes	Clostridia	Clostridiales	Lachnospiraceae		Lachnospiraceae bacterium A4
ALYIETLGNPNSEVSDIEAVAK	235.025	Lachnospiraceae bacterium A4	Species	Bacteria		Firmicutes	Clostridia	Clostridiales	Lachnospiraceae		Lachnospiraceae bacterium A4
ALYNVIPER	8207.23	Bacteria	Superkingdom	Bacteria
ALYQTEAFTADFQQPTEAK	23312.2	Mus musculus	Species	Eukaryota	Metazoa	Chordata	Mammalia	Rodentia	Muridae	Mus	Mus musculus
ALYQTEAFTADFQQPTEATK	439.357	Mus musculus	Species	Eukaryota	Metazoa	Chordata	Mammalia	Rodentia	Muridae	Mus	Mus musculus
ALYSNILGEENTYLWR	1589.81	Eukaryota	Superkingdom	Eukaryota
AMADAAQFPILDANILSR	2605.98	Lachnospiraceae bacterium MD335	Species	Bacteria		Firmicutes	Clostridia	Clostridiales	Lachnospiraceae		Lachnospiraceae bacterium MD335
AMAEIDMR	7250.21	Lactobacillus	Genus	Bacteria		Firmicutes	Bacilli	Lactobacillales	Lactobacillaceae	Lactobacillus
AMAEYYK	3764.09	Bacteria	Superkingdom	Bacteria
AMAGVIVVTTK	784.942	Bacteroidales	Order	Bacteria		Bacteroidetes	Bacteroidia	Bacteroidales
AMAIDSLDIAR	21616.5	Clostridium magnum	Species	Bacteria		Firmicutes	Clostridia	Clostridiales	Clostridiaceae	Clostridium	Clostridium magnum
AMAQFADTR	22381.2	Lachnospiraceae bacterium A4	Species	Bacteria		Firmicutes	Clostridia	Clostridiales	Lachnospiraceae		Lachnospiraceae bacterium A4
AMAVEVPAEFR	26327.1	Bacteroides	Genus	Bacteria		Bacteroidetes	Bacteroidia	Bacteroidales	Bacteroidaceae	Bacteroides
AMAWTEK	4954.6	Bacteria	Superkingdom	Bacteria
AMDDYKAETGK	2659.08	Firmicutes	Phylum	Bacteria		Firmicutes
AMDFYDPAR	2955.24	Mammalia	Class	Eukaryota	Metazoa	Chordata	Mammalia
AMDSDWFAQNYMGR	2375.62	Metazoa	Kingdom	Eukaryota	Metazoa
AMEEDGTFEVLPK	2099.97	Lactobacillaceae	Family	Bacteria		Firmicutes	Bacilli	Lactobacillales	Lactobacillaceae
AMEIAEALGR	43197.6	Mammalia	Class	Eukaryota	Metazoa	Chordata	Mammalia
AMELILTAK	905.853	Firmicutes	Phylum	Bacteria		Firmicutes
AMFDYMDVSPK	13725.4	Firmicutes	Phylum	Bacteria		Firmicutes
AMFEFADAR	4156.39	Lachnospiraceae bacterium MD335	Species	Bacteria		Firmicutes	Clostridia	Clostridiales	Lachnospiraceae		Lachnospiraceae bacterium MD335
AMFEFADIR	3361.83	Eubacterium plexicaudatum	Species	Bacteria		Firmicutes	Clostridia	Clostridiales	Eubacteriaceae	Eubacterium	Eubacterium plexicaudatum
AMFILPDQGK	2843.17	Muridae	Family	Eukaryota	Metazoa	Chordata	Mammalia	Rodentia	Muridae
AMGAAQVVVTDLSASR	2427.22	Mammalia	Class	Eukaryota	Metazoa	Chordata	Mammalia
AMGIADIDVSTQTGAAAAVDK	224.065	Lachnospiraceae bacterium MD308	Species	Bacteria		Firmicutes	Clostridia	Clostridiales	Lachnospiraceae		Lachnospiraceae bacterium MD308
AMGIMNSFVNDIFER	249.875	Metazoa	Kingdom	Eukaryota	Metazoa
AMIALDGTK	11131.2	Bacteria	Superkingdom	Bacteria
AMIDLDGTPNK	2192.48	Bacteria	Superkingdom	Bacteria
AMIELDGTPNKGR	1734.59	Bacteria	Superkingdom	Bacteria
AMIVFQSEFK	17847.5	Mus musculus	Species	Eukaryota	Metazoa	Chordata	Mammalia	Rodentia	Muridae	Mus	Mus musculus
AMIYNGEEFYESK	11560.6	Bacteria	Superkingdom	Bacteria
AMIYNGEEFYESKR	3113.17	Bacteria	Superkingdom	Bacteria
AMLDGTVFR	8623.13	Bacteria	Superkingdom	Bacteria
AMLEDIAILTGGK	3602.95	Bacteria	Superkingdom	Bacteria
AMLGEYLVNAQGEDVVAGVR	2457.99	Firmicutes	Phylum	Bacteria		Firmicutes
AMLQDIAVLTGGQVASDDTGTK	1484.42	Desulfovibrio	Genus	Bacteria		Proteobacteria	Deltaproteobacteria	Desulfovibrionales	Desulfovibrionaceae	Desulfovibrio
AMMEAMSR	10244.2	Lachnospiraceae	Family	Bacteria		Firmicutes	Clostridia	Clostridiales	Lachnospiraceae
AMNIEKPDYFDYLAK	9255.62	Lachnospiraceae bacterium MD335	Species	Bacteria		Firmicutes	Clostridia	Clostridiales	Lachnospiraceae		Lachnospiraceae bacterium MD335
AMNLAAEQYK	13575.6	Eubacterium plexicaudatum	Species	Bacteria		Firmicutes	Clostridia	Clostridiales	Eubacteriaceae	Eubacterium	Eubacterium plexicaudatum
AMNLMGLEAGTLR	9357.57	Lachnospiraceae bacterium A4	Species	Bacteria		Firmicutes	Clostridia	Clostridiales	Lachnospiraceae		Lachnospiraceae bacterium A4
AMNLMGMEVGPLR	4061.9	Clostridiales	Order	Bacteria		Firmicutes	Clostridia	Clostridiales
AMPVQPWDGK	1734.06	Firmicutes	Phylum	Bacteria		Firmicutes
AMQDALQR	39443.7	Eubacterium	Genus	Bacteria		Firmicutes	Clostridia	Clostridiales	Eubacteriaceae	Eubacterium
AMQEQLENYDFTK	976.652	Mammalia	Class	Eukaryota	Metazoa	Chordata	Mammalia
AMTLEEAEAFVGAER	1162.65	Rodentia	Order	Eukaryota	Metazoa	Chordata	Mammalia	Rodentia
AMVRDPAVFLLDEPLSNLDAK	504.916	Clostridiales	Order	Bacteria		Firmicutes	Clostridia	Clostridiales
AMVTYLLENGQIK	6685.85	Firmicutes	Phylum	Bacteria		Firmicutes
AMWYMSR	36065.2	Clostridiales	Order	Bacteria		Firmicutes	Clostridia	Clostridiales
AMYGFSPYR	7201.53	Eubacterium	Genus	Bacteria		Firmicutes	Clostridia	Clostridiales	Eubacteriaceae	Eubacterium
AMYIDGWIEDGEVR	18249.9	Mus musculus	Species	Eukaryota	Metazoa	Chordata	Mammalia	Rodentia	Muridae	Mus	Mus musculus
AMYLPDTLSPADQLK	2224.91	Chordata	Phylum	Eukaryota	Metazoa	Chordata
ANAALGNTDFR	52173	Lachnospiraceae bacterium A4	Species	Bacteria		Firmicutes	Clostridia	Clostridiales	Lachnospiraceae		Lachnospiraceae bacterium A4
ANADVETVGKDAEK	303.877	Lachnospiraceae bacterium MD335	Species	Bacteria		Firmicutes	Clostridia	Clostridiales	Lachnospiraceae		Lachnospiraceae bacterium MD335
ANAGEESVMNLDK	8066.08	Mammalia	Class	Eukaryota	Metazoa	Chordata	Mammalia
ANAIAPGFIETAMTAALPDDVRK	872.913	Prevotella	Genus	Bacteria		Bacteroidetes	Bacteroidia	Bacteroidales	Prevotellaceae	Prevotella
ANALLLPYVVEYNATEPTK	1610.46	Anaerotruncus sp. G3(2012)	Species	Bacteria		Firmicutes	Clostridia	Clostridiales	Ruminococcaceae	Anaerotruncus	Anaerotruncus sp. G3(2012)
ANAVADALVNTYGISR	7883.79	Prevotella	Genus	Bacteria		Bacteroidetes	Bacteroidia	Bacteroidales	Prevotellaceae	Prevotella
ANAVPIQLPIGK	1409.18	Clostridiales	Order	Bacteria		Firmicutes	Clostridia	Clostridiales
ANAYLEEK	21674.8	Roseivirga ehrenbergii	Species	Bacteria		Bacteroidetes	Cytophagia	Cytophagales	Roseivirgaceae	Roseivirga	Roseivirga ehrenbergii
ANDYTTEYSASVK	9443.88	Mus musculus	Species	Eukaryota	Metazoa	Chordata	Mammalia	Rodentia	Muridae	Mus	Mus musculus
ANELVQNTK	19717.5	Lachnospiraceae bacterium A4	Species	Bacteria		Firmicutes	Clostridia	Clostridiales	Lachnospiraceae		Lachnospiraceae bacterium A4
ANEVQAAIAK	87488.6	Bacteroidales	Order	Bacteria		Bacteroidetes	Bacteroidia	Bacteroidales
ANEVTAAIAK	33393.3	Bacteroidales	Order	Bacteria		Bacteroidetes	Bacteroidia	Bacteroidales
ANEWLGYDNIK	565264	Mus musculus	Species	Eukaryota	Metazoa	Chordata	Mammalia	Rodentia	Muridae	Mus	Mus musculus
ANFETAIIER	19862.9	Lachnospiraceae bacterium MD335	Species	Bacteria		Firmicutes	Clostridia	Clostridiales	Lachnospiraceae		Lachnospiraceae bacterium MD335
ANFETAIK	8542.07	Clostridiales	Order	Bacteria		Firmicutes	Clostridia	Clostridiales
ANFNDFGIMGINK	1560.66	Clostridiales	Order	Bacteria		Firmicutes	Clostridia	Clostridiales
ANGDTELAPGVNQTVR	6018.4	Lachnospiraceae bacterium A4	Species	Bacteria		Firmicutes	Clostridia	Clostridiales	Lachnospiraceae		Lachnospiraceae bacterium A4
ANGGAPYIDTADFEGNLEK	1267.63	Lachnospiraceae bacterium 28-4	Species	Bacteria		Firmicutes	Clostridia	Clostridiales	Lachnospiraceae		Lachnospiraceae bacterium 28-4
ANGTPITQGVDTSNPTK	1219.28	Mus musculus	Species	Eukaryota	Metazoa	Chordata	Mammalia	Rodentia	Muridae	Mus	Mus musculus
ANIEAMADHVSEK	1888.95	Lachnospiraceae bacterium M18-1	Species	Bacteria		Firmicutes	Clostridia	Clostridiales	Lachnospiraceae		Lachnospiraceae bacterium M18-1
ANIFLIDDK	3862.06	Anaerotruncus sp. G3(2012)	Species	Bacteria		Firmicutes	Clostridia	Clostridiales	Ruminococcaceae	Anaerotruncus	Anaerotruncus sp. G3(2012)
ANIINTR	10715.8	Photobacterium galatheae	Species	Bacteria		Proteobacteria	Gammaproteobacteria	Vibrionales	Vibrionaceae	Photobacterium	Photobacterium galatheae
ANIQAVSLK	3085.71	Metazoa	Kingdom	Eukaryota	Metazoa
ANISEQSATTVR	4147.01	Chordata	Phylum	Eukaryota	Metazoa	Chordata
ANKPGDVVR	37675.3	Metazoa	Kingdom	Eukaryota	Metazoa
ANLAIQGLK	4693.67	Bacteroides reticulotermitis	Species	Bacteria		Bacteroidetes	Bacteroidia	Bacteroidales	Bacteroidaceae	Bacteroides	Bacteroides reticulotermitis
ANLISEDIESAISDSK	4139.54	Mammalia	Class	Eukaryota	Metazoa	Chordata	Mammalia
ANLLNADELTYNIK	3994.09	Bacteroides	Genus	Bacteria		Bacteroidetes	Bacteroidia	Bacteroidales	Bacteroidaceae	Bacteroides
ANLLQAEIEELR	1974.55	Chordata	Phylum	Eukaryota	Metazoa	Chordata
ANLQAEVK	10556	Burkholderia vietnamiensis	Species	Bacteria		Proteobacteria	Betaproteobacteria	Burkholderiales	Burkholderiaceae	Burkholderia	Burkholderia vietnamiensis
ANLQIDQINTDLNLER	733.052	Mammalia	Class	Eukaryota	Metazoa	Chordata	Mammalia
ANLTGAVATVNAK	1538.59	Bacteroidales	Order	Bacteria		Bacteroidetes	Bacteroidia	Bacteroidales
ANLVDVEDSNLGLK	28732.9	Lachnospiraceae bacterium 28-4	Species	Bacteria		Firmicutes	Clostridia	Clostridiales	Lachnospiraceae		Lachnospiraceae bacterium 28-4
ANNVSQETLDKMEDDVR	2943.74	Lactobacillus murinus	Species	Bacteria		Firmicutes	Bacilli	Lactobacillales	Lactobacillaceae	Lactobacillus	Lactobacillus murinus
ANNYNDYGDYWR	8169.53	Mus musculus	Species	Eukaryota	Metazoa	Chordata	Mammalia	Rodentia	Muridae	Mus	Mus musculus
ANPIQGFSAK	51378.3	Rodentia	Order	Eukaryota	Metazoa	Chordata	Mammalia	Rodentia
ANPLYWDAENVTIK	9720.68	Hungateiclostridiaceae bacterium KB18	Species	Bacteria		Firmicutes	Clostridia	Clostridiales	Hungateiclostridiaceae		Hungateiclostridiaceae bacterium KB18
ANPSQVAVNQGTYNR	3631.78	Lachnospiraceae bacterium A2	Species	Bacteria		Firmicutes	Clostridia	Clostridiales	Lachnospiraceae		Lachnospiraceae bacterium A2
ANPVLDLPTK	4908.64	Mus musculus	Species	Eukaryota	Metazoa	Chordata	Mammalia	Rodentia	Muridae	Mus	Mus musculus
ANPYSTGTIR	4959.73	Lachnospiraceae bacterium A4	Species	Bacteria		Firmicutes	Clostridia	Clostridiales	Lachnospiraceae		Lachnospiraceae bacterium A4
ANQITVTAK	4248.72	Lachnospiraceae bacterium MD335	Species	Bacteria		Firmicutes	Clostridia	Clostridiales	Lachnospiraceae		Lachnospiraceae bacterium MD335
ANTAAMTLENQHAF	1834.89	Mus musculus	Species	Eukaryota	Metazoa	Chordata	Mammalia	Rodentia	Muridae	Mus	Mus musculus
ANTNAPIPSK	1744.98	Lachnospiraceae bacterium MD335	Species	Bacteria		Firmicutes	Clostridia	Clostridiales	Lachnospiraceae		Lachnospiraceae bacterium MD335
ANTTLEGLAK	11493.4	Bacteria	Superkingdom	Bacteria
ANVIEFNPGFTPDSK	12383.7	Lachnospiraceae bacterium A2	Species	Bacteria		Firmicutes	Clostridia	Clostridiales	Lachnospiraceae		Lachnospiraceae bacterium A2
ANVIEYNPGFTPNDK	10815.7	Eubacterium sp. 14-2	Species	Bacteria		Firmicutes	Clostridia	Clostridiales	Eubacteriaceae	Eubacterium	Eubacterium sp. 14-2
ANVLVFPDLDAGNIGYK	18018.5	Bacteria	Superkingdom	Bacteria
ANVNFER	6813.84	Bacteria	Superkingdom	Bacteria
ANVYAIYWEER	2461.27	Lachnospiraceae bacterium MD335	Species	Bacteria		Firmicutes	Clostridia	Clostridiales	Lachnospiraceae		Lachnospiraceae bacterium MD335
ANWAELK	7091.35	Lachnospiraceae bacterium A4	Species	Bacteria		Firmicutes	Clostridia	Clostridiales	Lachnospiraceae		Lachnospiraceae bacterium A4
ANWESSDPSVVSVNKK	489.265	Lachnospiraceae bacterium MD335	Species	Bacteria		Firmicutes	Clostridia	Clostridiales	Lachnospiraceae		Lachnospiraceae bacterium MD335
ANWYFLLAR	715.37	Chordata	Phylum	Eukaryota	Metazoa	Chordata
ANYAEENPLLAYYYDK	1939.77	Lachnospiraceae bacterium MD335	Species	Bacteria		Firmicutes	Clostridia	Clostridiales	Lachnospiraceae		Lachnospiraceae bacterium MD335
ANYIEENPSLGYYYNK	2013.79	Lachnospiraceae bacterium MD335	Species	Bacteria		Firmicutes	Clostridia	Clostridiales	Lachnospiraceae		Lachnospiraceae bacterium MD335
ANYSLNTDDPLIFK	2244.99	Chordata	Phylum	Eukaryota	Metazoa	Chordata
ANYTLLDR	13676.8	Bacteroidales	Order	Bacteria		Bacteroidetes	Bacteroidia	Bacteroidales
APAGGYQEFLLNEAR	2450.34	Firmicutes bacterium ASF500	Species	Bacteria		Firmicutes					Firmicutes bacterium ASF500
APAGGYQEFLMNEAR	4582.96	Bacteria	Superkingdom	Bacteria
APAGSVLSTIATDNYGAGATAADNLYPALK	1007.12	Lachnospiraceae bacterium 28-4	Species	Bacteria		Firmicutes	Clostridia	Clostridiales	Lachnospiraceae		Lachnospiraceae bacterium 28-4
APAMFNIR	4735.32	Eukaryota	Superkingdom	Eukaryota
APAPVPPGTVTQVDVR	1907.69	Chordata	Phylum	Eukaryota	Metazoa	Chordata
APATATGIK	10429.9	Bacteria	Superkingdom	Bacteria
APDFVFYAPR	16451.1	Metazoa	Kingdom	Eukaryota	Metazoa
APDGTGVIAGGPAR	3925.09	Clostridiales	Order	Bacteria		Firmicutes	Clostridia	Clostridiales
APDLVMEGPER	24877	Clostridiales	Order	Bacteria		Firmicutes	Clostridia	Clostridiales
APDVAPAPLPLSAK	3340.66	Clostridium sp. MD294	Species	Bacteria		Firmicutes	Clostridia	Clostridiales	Clostridiaceae	Clostridium	Clostridium sp. MD294
APDVTTLSR	27526.4	Mus musculus	Species	Eukaryota	Metazoa	Chordata	Mammalia	Rodentia	Muridae	Mus	Mus musculus
APEEFELLSK	2905.54	Mammalia	Class	Eukaryota	Metazoa	Chordata	Mammalia
APEEILAEK	15216.8	Mammalia	Class	Eukaryota	Metazoa	Chordata	Mammalia
APEGTGIIAGGPAR	40633.1	Firmicutes	Phylum	Bacteria		Firmicutes
APEGTGIIAGGPVR	3293.74	Clostridiales	Order	Bacteria		Firmicutes	Clostridia	Clostridiales
APEPVEIR	99592.9	Eukaryota	Superkingdom	Eukaryota
APFDDANVR	9324.01	Microbacterium oleivorans	Species	Bacteria		Actinobacteria	Actinobacteria	Micrococcales	Microbacteriaceae	Microbacterium	Microbacterium oleivorans
APFVLYAK	5207.69	Lachnospiraceae bacterium A4	Species	Bacteria		Firmicutes	Clostridia	Clostridiales	Lachnospiraceae		Lachnospiraceae bacterium A4
APIAIPAGVTVK	8816.06	Bacteroides	Genus	Bacteria		Bacteroidetes	Bacteroidia	Bacteroidales	Bacteroidaceae	Bacteroides
APIIAVTR	17744.2	Metazoa	Kingdom	Eukaryota	Metazoa
APILIATDVASR	1163.72	Metazoa	Kingdom	Eukaryota	Metazoa
APIPTALDTNSSK	18020.2	Mus musculus	Species	Eukaryota	Metazoa	Chordata	Mammalia	Rodentia	Muridae	Mus	Mus musculus
APIQWEER	13466.2	Chordata	Phylum	Eukaryota	Metazoa	Chordata
APISAENYTEDEAK	634.873	Bacteroides	Genus	Bacteria		Bacteroidetes	Bacteroidia	Bacteroidales	Bacteroidaceae	Bacteroides
APITGYIIR	3193.13	Rodentia	Order	Eukaryota	Metazoa	Chordata	Mammalia	Rodentia
APLAEMFGYVTALR	823.477	Bacteroidales	Order	Bacteria		Bacteroidetes	Bacteroidia	Bacteroidales
APLGDMEPENVEK	4185.81	Lachnospiraceae bacterium A2	Species	Bacteria		Firmicutes	Clostridia	Clostridiales	Lachnospiraceae		Lachnospiraceae bacterium A2
APLNVQFSSPLPGEAVK	2012.42	Mammalia	Class	Eukaryota	Metazoa	Chordata	Mammalia
APLVLEQGLR	22256.1	Rodentia	Order	Eukaryota	Metazoa	Chordata	Mammalia	Rodentia
APLVPPGSPVVNALFR	2512.95	Mammalia	Class	Eukaryota	Metazoa	Chordata	Mammalia
APMAAQGMVETR	2346.58	Mammalia	Class	Eukaryota	Metazoa	Chordata	Mammalia
APNDEEYAVAMADLEK	6158.43	Clostridiales	Order	Bacteria		Firmicutes	Clostridia	Clostridiales
APQNAYASAEGINK	4373.74	Lachnospiraceae bacterium 28-4	Species	Bacteria		Firmicutes	Clostridia	Clostridiales	Lachnospiraceae		Lachnospiraceae bacterium 28-4
APQVSTPTLVEAAR	58775.7	Metazoa	Kingdom	Eukaryota	Metazoa
APQVYILPPPAEQLSR	4263.73	Mus musculus	Species	Eukaryota	Metazoa	Chordata	Mammalia	Rodentia	Muridae	Mus	Mus musculus
APQWTGGGVVFAPTPR	7263.86	Bacteria	Superkingdom	Bacteria
APQWTGGGVVFAPVPR	13352.9	Firmicutes	Phylum	Bacteria		Firmicutes
APSDLYQIILK	2935.1	Mammalia	Class	Eukaryota	Metazoa	Chordata	Mammalia
APSGEVAIR	11116.5	Muridae	Family	Eukaryota	Metazoa	Chordata	Mammalia	Rodentia	Muridae
APSSSSVGISEWLDQK	1553.53	Mus musculus	Species	Eukaryota	Metazoa	Chordata	Mammalia	Rodentia	Muridae	Mus	Mus musculus
APTGDYQAFLK	8803.85	Clostridium	Genus	Bacteria		Firmicutes	Clostridia	Clostridiales	Clostridiaceae	Clostridium
APTNLPDPVR	539933	Mus musculus	Species	Eukaryota	Metazoa	Chordata	Mammalia	Rodentia	Muridae	Mus	Mus musculus
APTSYTPDMVQEEQKK	749.042	Mus musculus	Species	Eukaryota	Metazoa	Chordata	Mammalia	Rodentia	Muridae	Mus	Mus musculus
APVDSVLTGTVK	3542.93	Lactobacillales	Order	Bacteria		Firmicutes	Bacilli	Lactobacillales
APVEEMTDAQVEDIK	1228.09	Clostridiales	Order	Bacteria		Firmicutes	Clostridia	Clostridiales
APVILQVSK	34496	Firmicutes	Phylum	Bacteria		Firmicutes
APVPASELLDAK	3713	Mammalia	Class	Eukaryota	Metazoa	Chordata	Mammalia
APVPTGEVYFADSFDR	2029.44	Metazoa	Kingdom	Eukaryota	Metazoa
APWMEQEGPEYWER	722.48	Mammalia	Class	Eukaryota	Metazoa	Chordata	Mammalia
APYSTVSQGEVLK	2785.13	Lachnospiraceae bacterium MD335	Species	Bacteria		Firmicutes	Clostridia	Clostridiales	Lachnospiraceae		Lachnospiraceae bacterium MD335
APYYINK	27199.3	Bacteria	Superkingdom	Bacteria
AQAAQYMVYK	33231.3	Lachnospiraceae bacterium MD335	Species	Bacteria		Firmicutes	Clostridia	Clostridiales	Lachnospiraceae		Lachnospiraceae bacterium MD335
AQAEAQQPVFNTLR	1069.28	Muridae	Family	Eukaryota	Metazoa	Chordata	Mammalia	Rodentia	Muridae
AQAELEAQELQR	1472.67	Rodentia	Order	Eukaryota	Metazoa	Chordata	Mammalia	Rodentia
AQAELESVSTALSEAESK	906.251	Rodentia	Order	Eukaryota	Metazoa	Chordata	Mammalia	Rodentia
AQAHIEAGAK	27924.3	Bacteria	Superkingdom	Bacteria
AQAHINAGAR	4439.99	Firmicutes	Phylum	Bacteria		Firmicutes
AQAHITAGAK	1433.31	Bacteria	Superkingdom	Bacteria
AQAHLAAGAK	4298.25	Lactobacillus bifermentans	Species	Bacteria		Firmicutes	Bacilli	Lactobacillales	Lactobacillaceae	Lactobacillus	Lactobacillus bifermentans
AQAHLDAGAK	35984.8	Bacteria	Superkingdom	Bacteria
AQALNSDLVK	5501.15	Clostridium sp. MD294	Species	Bacteria		Firmicutes	Clostridia	Clostridiales	Clostridiaceae	Clostridium	Clostridium sp. MD294
AQAPASPYNDYEGR	4308.31	Rodentia	Order	Eukaryota	Metazoa	Chordata	Mammalia	Rodentia
AQAVFAVK	11764.2	Bodo saltans	Species	Eukaryota		Euglenozoa	Kinetoplastea	Eubodonida	Bodonidae	Bodo	Bodo saltans
AQDFIYSWNR	13889.1	Lachnospiraceae bacterium A2	Species	Bacteria		Firmicutes	Clostridia	Clostridiales	Lachnospiraceae		Lachnospiraceae bacterium A2
AQDGLYFLR	1164420	Muridae	Family	Eukaryota	Metazoa	Chordata	Mammalia	Rodentia	Muridae
AQDMPAQAK	8366.73	Mus musculus	Species	Eukaryota	Metazoa	Chordata	Mammalia	Rodentia	Muridae	Mus	Mus musculus
AQDPSVTYLMGLFEPVDTK	10691.9	Mus musculus	Species	Eukaryota	Metazoa	Chordata	Mammalia	Rodentia	Muridae	Mus	Mus musculus
AQDVGLAVAR	6112.7	Lactobacillus	Genus	Bacteria		Firmicutes	Bacilli	Lactobacillales	Lactobacillaceae	Lactobacillus
AQEAGITTVVFDR	1694.05	Bacteria	Superkingdom	Bacteria
AQEEAERLEADR	4639.76	Metazoa	Kingdom	Eukaryota	Metazoa
AQEIDQTNDFK	3265.38	Mus musculus	Species	Eukaryota	Metazoa	Chordata	Mammalia	Rodentia	Muridae	Mus	Mus musculus
AQEINSGSEAWAEVQR	44344.3	Mus musculus	Species	Eukaryota	Metazoa	Chordata	Mammalia	Rodentia	Muridae	Mus	Mus musculus
AQFDQAIK	2817.39	Flavonifractor	Genus	Bacteria		Firmicutes	Clostridia	Clostridiales	Ruminococcaceae	Flavonifractor
AQFEAYDSIDKAPEEK	9355.19	Oscillibacter	Genus	Bacteria		Firmicutes	Clostridia	Clostridiales	Oscillospiraceae	Oscillibacter
AQFEGIVTDLIK	2810.75	Metazoa	Kingdom	Eukaryota	Metazoa
AQFEGIVTDLIKR	1082.64	Metazoa	Kingdom	Eukaryota	Metazoa
AQFEQLADK	15966.4	Bacteroidetes	Phylum	Bacteria		Bacteroidetes
AQFGQPEILLGTIPGAGGTQR	1663.91	Eukaryota	Superkingdom	Eukaryota
AQFLQNITDAFTK	3033.31	Lactobacillus reuteri	Species	Bacteria		Firmicutes	Bacilli	Lactobacillales	Lactobacillaceae	Lactobacillus	Lactobacillus reuteri
AQGAYFMNPDEVK	1571.56	Dorea sp. 5-2	Species	Bacteria		Firmicutes	Clostridia	Clostridiales	Lachnospiraceae	Dorea	Dorea sp. 5-2
AQGHLDAGAK	13253.1	Bacteria	Superkingdom	Bacteria
AQGNEIGTSLVDDSK	15092.5	Eubacterium plexicaudatum	Species	Bacteria		Firmicutes	Clostridia	Clostridiales	Eubacteriaceae	Eubacterium	Eubacterium plexicaudatum
AQGTPPVQSVIFSATK	263158	Mammalia	Class	Eukaryota	Metazoa	Chordata	Mammalia
AQGYEIGK	9785.66	Bacteria	Superkingdom	Bacteria
AQIAETTSDFDR	867.953	Lactobacillus	Genus	Bacteria		Firmicutes	Bacilli	Lactobacillales	Lactobacillaceae	Lactobacillus
AQIAETTSDFDREK	1971.7	Lactobacillus	Genus	Bacteria		Firmicutes	Bacilli	Lactobacillales	Lactobacillaceae	Lactobacillus
AQIEESTSDYDR	3413.58	Bacteria	Superkingdom	Bacteria
AQIEESTSDYDREK	12863.7	Bacteria	Superkingdom	Bacteria
AQIEETTSDFDK	3166.89	Bacteria	Superkingdom	Bacteria
AQIEETTSDFDKEK	13639.4	Bacteria	Superkingdom	Bacteria
AQIEETTSDFDR	4357.27	Bacteria	Superkingdom	Bacteria
AQIEETTSDFDREK	5781.97	Bacteria	Superkingdom	Bacteria
AQIEETTSEFDKEK	10963.7	Firmicutes	Phylum	Bacteria		Firmicutes
AQIETTTSDFDKEK	1912.51	Ruminococcus	Genus	Bacteria		Firmicutes	Clostridia	Clostridiales	Ruminococcaceae	Ruminococcus
AQIETTTSDFDR	2173.54	Bacteria	Superkingdom	Bacteria
AQIETTTSDFDREK	1959.4	Bacteria	Superkingdom	Bacteria
AQIETTTSNYDK	708.793	Bacteria	Superkingdom	Bacteria
AQIETTTSNYDKEK	1523.26	Bacteria	Superkingdom	Bacteria
AQIFANSVDNAR	12149	Chordata	Phylum	Eukaryota	Metazoa	Chordata
AQIIHDSFNLASAK	668.325	Mus musculus	Species	Eukaryota	Metazoa	Chordata	Mammalia	Rodentia	Muridae	Mus	Mus musculus
AQISGLNK	12683.9	Mucispirillum schaedleri	Species	Bacteria		Deferribacteres	Deferribacteres	Deferribacterales	Deferribacteraceae	Mucispirillum	Mucispirillum schaedleri
AQITGLATAEK	31851.9	Lachnospiraceae bacterium M18-1	Species	Bacteria		Firmicutes	Clostridia	Clostridiales	Lachnospiraceae		Lachnospiraceae bacterium M18-1
AQITGLETAQK	532919	Clostridiales	Order	Bacteria		Firmicutes	Clostridia	Clostridiales
AQITGLNTAQK	154491	Lachnoclostridium	Genus	Bacteria		Firmicutes	Clostridia	Clostridiales	Lachnospiraceae	Lachnoclostridium
AQITGLQAAQK	20628.4	Oscillibacter sp. 1-3	Species	Bacteria		Firmicutes	Clostridia	Clostridiales	Oscillospiraceae	Oscillibacter	Oscillibacter sp. 1-3
AQITGMGSFEDAEK	1985.62	Lachnospiraceae bacterium MD335	Species	Bacteria		Firmicutes	Clostridia	Clostridiales	Lachnospiraceae		Lachnospiraceae bacterium MD335
AQIWDTAGQER	20150.3	Eukaryota	Superkingdom	Eukaryota
AQLDIPSIVR	10486.9	Clostridiales	Order	Bacteria		Firmicutes	Clostridia	Clostridiales
AQLEPVASPAK	1820.04	Mammalia	Class	Eukaryota	Metazoa	Chordata	Mammalia
AQLGDVVQINYR	6652.5	Lachnospiraceae bacterium A4	Species	Bacteria		Firmicutes	Clostridia	Clostridiales	Lachnospiraceae		Lachnospiraceae bacterium A4
AQLIEEWANSVK	3108.88	Chordata	Phylum	Eukaryota	Metazoa	Chordata
AQLLNYK	52098.6	Mammalia	Class	Eukaryota	Metazoa	Chordata	Mammalia
AQLLQQELFR	45441.5	Clostridium sp. MD294	Species	Bacteria		Firmicutes	Clostridia	Clostridiales	Clostridiaceae	Clostridium	Clostridium sp. MD294
AQLTLDLQDVNK	2796.54	Lachnospiraceae bacterium A4	Species	Bacteria		Firmicutes	Clostridia	Clostridiales	Lachnospiraceae		Lachnospiraceae bacterium A4
AQMAAIVYR	4677.5	Lysinibacillus odysseyi	Species	Bacteria		Firmicutes	Bacilli	Bacillales	Bacillaceae	Lysinibacillus	Lysinibacillus odysseyi
AQMALHDR	60243.2	Bacteria	Superkingdom	Bacteria
AQNSVDLSGDK	18608.4	Lachnospiraceae bacterium A4	Species	Bacteria		Firmicutes	Clostridia	Clostridiales	Lachnospiraceae		Lachnospiraceae bacterium A4
AQPTGAIPPGTVLGDGK	3982.99	Lactobacillus	Genus	Bacteria		Firmicutes	Bacilli	Lactobacillales	Lactobacillaceae	Lactobacillus
AQPVSQILQLK	138575	Mus musculus	Species	Eukaryota	Metazoa	Chordata	Mammalia	Rodentia	Muridae	Mus	Mus musculus
AQQALVQK	2204.24	Metazoa	Kingdom	Eukaryota	Metazoa
AQQEFMNIK	19185	Firmicutes	Phylum	Bacteria		Firmicutes
AQQIVQSVIDSGEK	30395.7	Lachnospiraceae	Family	Bacteria		Firmicutes	Clostridia	Clostridiales	Lachnospiraceae
AQQLADVEAK	6281.85	Rodentia	Order	Eukaryota	Metazoa	Chordata	Mammalia	Rodentia
AQQLEQIR	9923.23	Metazoa	Kingdom	Eukaryota	Metazoa
AQQVSQGLDVLTAK	3183.36	Mammalia	Class	Eukaryota	Metazoa	Chordata	Mammalia
AQSELSGAADEAAR	13064.9	Mammalia	Class	Eukaryota	Metazoa	Chordata	Mammalia
AQSMDALTSMSTVAGYK	14646.3	Bacteria	Superkingdom	Bacteria
AQSVNMPYVIER	31303.1	Bacteroidales	Order	Bacteria		Bacteroidetes	Bacteroidia	Bacteroidales
AQTMLEFFPESSGEYTFK	839.855	Lachnospiraceae bacterium MD335	Species	Bacteria		Firmicutes	Clostridia	Clostridiales	Lachnospiraceae		Lachnospiraceae bacterium MD335
AQTVTFLYR	5249.95	Firmicutes	Phylum	Bacteria		Firmicutes
AQVAAMVAR	30482.7	Bacteria	Superkingdom	Bacteria
AQVAQPGGDTIFGK	6886.09	Metazoa	Kingdom	Eukaryota	Metazoa
AQVLNLLNR	3531.18	Bacteria	Superkingdom	Bacteria
AQVVNQEAIDK	18015.2	Clostridiales	Order	Bacteria		Firmicutes	Clostridia	Clostridiales
AQVVTIENSVMDHNNNTIQNGYR	1504.7	Mus musculus	Species	Eukaryota	Metazoa	Chordata	Mammalia	Rodentia	Muridae	Mus	Mus musculus
AQYDAAMTFGPSQIAK	1582.19	Mus musculus	Species	Eukaryota	Metazoa	Chordata	Mammalia	Rodentia	Muridae	Mus	Mus musculus
AQYEALAQK	7256.36	Chordata	Phylum	Eukaryota	Metazoa	Chordata
AQYEDIANR	126826	Chordata	Phylum	Eukaryota	Metazoa	Chordata
AQYEDIAQK	205196	Chordata	Phylum	Eukaryota	Metazoa	Chordata
AQYEDIAQR	28259.7	Chordata	Phylum	Eukaryota	Metazoa	Chordata
AQYEDYSSIDKAPEER	3380.63	Clostridiales	Order	Bacteria		Firmicutes	Clostridia	Clostridiales
AQYIVLGR	1295.86	Lachnospiraceae bacterium MD335	Species	Bacteria		Firmicutes	Clostridia	Clostridiales	Lachnospiraceae		Lachnospiraceae bacterium MD335
AREEITIGTEPVDLDGLNYLAGK	1570.15	Lachnospiraceae	Family	Bacteria		Firmicutes	Clostridia	Clostridiales	Lachnospiraceae
ARNDESQLSPATR	1275.17	Rodentia	Order	Eukaryota	Metazoa	Chordata	Mammalia	Rodentia
ASAAGIPVIFFNR	69935.6	Firmicutes	Phylum	Bacteria		Firmicutes
ASAELALGENNEVLK	6179.93	Mammalia	Class	Eukaryota	Metazoa	Chordata	Mammalia
ASAFALQEQPVVNAVIDDATK	885.328	Mammalia	Class	Eukaryota	Metazoa	Chordata	Mammalia
ASAFISQEEVSYMTK	3587.24	Lachnospiraceae bacterium A2	Species	Bacteria		Firmicutes	Clostridia	Clostridiales	Lachnospiraceae		Lachnospiraceae bacterium A2
ASAGVIMITTK	3126.71	Bacteroidales	Order	Bacteria		Bacteroidetes	Bacteroidia	Bacteroidales
ASAGVVMITTK	4733.18	Bacteroides oleiciplenus	Species	Bacteria		Bacteroidetes	Bacteroidia	Bacteroidales	Bacteroidaceae	Bacteroides	Bacteroides oleiciplenus
ASAHGEPLGDDNVK	2876.96	Clostridiales	Order	Bacteria		Firmicutes	Clostridia	Clostridiales
ASAHITAGAR	2866.87	Firmicutes	Phylum	Bacteria		Firmicutes
ASAILEAEAEK	2561.83	Clostridium	Genus	Bacteria		Firmicutes	Clostridia	Clostridiales	Clostridiaceae	Clostridium
ASALHDVGK	4466.59	Lachnospiraceae bacterium MD335	Species	Bacteria		Firmicutes	Clostridia	Clostridiales	Lachnospiraceae		Lachnospiraceae bacterium MD335
ASANMDLMR	89451.2	Mammalia	Class	Eukaryota	Metazoa	Chordata	Mammalia
ASAYVLEK	3857.58	Lachnospiraceae bacterium A4	Species	Bacteria		Firmicutes	Clostridia	Clostridiales	Lachnospiraceae		Lachnospiraceae bacterium A4
ASDDDTLGTAIVK	6594.09	Lachnospiraceae bacterium A4	Species	Bacteria		Firmicutes	Clostridia	Clostridiales	Lachnospiraceae		Lachnospiraceae bacterium A4
ASDDFDGTDATLQNEYTK	1136.03	Lachnospiraceae bacterium A4	Species	Bacteria		Firmicutes	Clostridia	Clostridiales	Lachnospiraceae		Lachnospiraceae bacterium A4
ASDIDEVILVGGSTR	3638.32	Bacteria	Superkingdom	Bacteria
ASDKLIVR	1460.37	Bacteria	Superkingdom	Bacteria
ASDSLEPPAADLFTGVLPNNYNPPK	661.202	Mus musculus	Species	Eukaryota	Metazoa	Chordata	Mammalia	Rodentia	Muridae	Mus	Mus musculus
ASDTSITWNNLK	20321.2	Mus musculus	Species	Eukaryota	Metazoa	Chordata	Mammalia	Rodentia	Muridae	Mus	Mus musculus
ASENAVLTAR	11806.7	Clostridiales	Order	Bacteria		Firmicutes	Clostridia	Clostridiales
ASENIYSYLAWYQQK	2883.06	Mus musculus	Species	Eukaryota	Metazoa	Chordata	Mammalia	Rodentia	Muridae	Mus	Mus musculus
ASEPQPSGYDNLTFLPDHK	1993	Mus musculus	Species	Eukaryota	Metazoa	Chordata	Mammalia	Rodentia	Muridae	Mus	Mus musculus
ASESYTIR	16391.8	Lachnospiraceae bacterium A4	Species	Bacteria		Firmicutes	Clostridia	Clostridiales	Lachnospiraceae		Lachnospiraceae bacterium A4
ASEVQAAIAK	26286.2	Alistipes	Genus	Bacteria		Bacteroidetes	Bacteroidia	Bacteroidales	Rikenellaceae	Alistipes
ASFDYVR	7828.23	Lachnospiraceae bacterium A4	Species	Bacteria		Firmicutes	Clostridia	Clostridiales	Lachnospiraceae		Lachnospiraceae bacterium A4
ASFNQAVAGAK	35145.7	Muridae	Family	Eukaryota	Metazoa	Chordata	Mammalia	Rodentia	Muridae
ASFTLDGWK	9142.2	Lachnospiraceae bacterium A4	Species	Bacteria		Firmicutes	Clostridia	Clostridiales	Lachnospiraceae		Lachnospiraceae bacterium A4
ASFVDEHTVR	2756.81	Mus musculus	Species	Eukaryota	Metazoa	Chordata	Mammalia	Rodentia	Muridae	Mus	Mus musculus
ASGAFDNAAMSK	6812.71	Mus musculus	Species	Eukaryota	Metazoa	Chordata	Mammalia	Rodentia	Muridae	Mus	Mus musculus
ASGATNASFNYEK	6815.83	Eubacterium plexicaudatum	Species	Bacteria		Firmicutes	Clostridia	Clostridiales	Eubacteriaceae	Eubacterium	Eubacterium plexicaudatum
ASGGWAAASDSR	8901.31	Mus musculus	Species	Eukaryota	Metazoa	Chordata	Mammalia	Rodentia	Muridae	Mus	Mus musculus
ASGLENYDYNPEK	1801.71	Anaerotruncus sp. G3(2012)	Species	Bacteria		Firmicutes	Clostridia	Clostridiales	Ruminococcaceae	Anaerotruncus	Anaerotruncus sp. G3(2012)
ASGMPTATNMINTDWR	1363.75	Anaerotruncus sp. G3(2012)	Species	Bacteria		Firmicutes	Clostridia	Clostridiales	Ruminococcaceae	Anaerotruncus	Anaerotruncus sp. G3(2012)
ASGNYATVISHNPETK	830.758	Metazoa	Kingdom	Eukaryota	Metazoa
ASGPPVSELITK	15146.3	Mammalia	Class	Eukaryota	Metazoa	Chordata	Mammalia
ASGYEIWSK	3148.44	Lachnospiraceae bacterium A2	Species	Bacteria		Firmicutes	Clostridia	Clostridiales	Lachnospiraceae		Lachnospiraceae bacterium A2
ASGYTFTDYYMNWVK	4431.99	Mus musculus	Species	Eukaryota	Metazoa	Chordata	Mammalia	Rodentia	Muridae	Mus	Mus musculus
ASGYTFTSYDINWVK	1184.43	Mus musculus	Species	Eukaryota	Metazoa	Chordata	Mammalia	Rodentia	Muridae	Mus	Mus musculus
ASIAALEAK	5097.1	Chordata	Phylum	Eukaryota	Metazoa	Chordata
ASIDVTAAAQNIK	722.243	Rodentia	Order	Eukaryota	Metazoa	Chordata	Mammalia	Rodentia
ASIGATSNKDTQDILYAR	1079	Rodentia	Order	Eukaryota	Metazoa	Chordata	Mammalia	Rodentia
ASIYNAMPIEGVEK	54998.9	Bacteria	Superkingdom	Bacteria
ASLATDSFLSAASFQETTK	1685.01	Bacteria	Superkingdom	Bacteria
ASLDMFNQK	11758.1	Mus musculus	Species	Eukaryota	Metazoa	Chordata	Mammalia	Rodentia	Muridae	Mus	Mus musculus
ASLEAAIADAEQR	25332.4	Chordata	Phylum	Eukaryota	Metazoa	Chordata
ASLEAAIADAEQRGEMAIK	3546.15	Chordata	Phylum	Eukaryota	Metazoa	Chordata
ASLEADLNDIK	12114.1	Lachnospiraceae bacterium MD335	Species	Bacteria		Firmicutes	Clostridia	Clostridiales	Lachnospiraceae		Lachnospiraceae bacterium MD335
ASLEGSLAETENR	1632.52	Mammalia	Class	Eukaryota	Metazoa	Chordata	Mammalia
ASLENSLEETK	11936.4	Mammalia	Class	Eukaryota	Metazoa	Chordata	Mammalia
ASLENSLEETKGR	2106.06	Mammalia	Class	Eukaryota	Metazoa	Chordata	Mammalia
ASLGTLNTLADVPDDEVQGR	1174.36	Mus	Genus	Eukaryota	Metazoa	Chordata	Mammalia	Rodentia	Muridae	Mus
ASLIEYIK	1325.54	Chordata	Phylum	Eukaryota	Metazoa	Chordata
ASLINNAFQLVSIEK	857.301	Chordata	Phylum	Eukaryota	Metazoa	Chordata
ASLMNEDFEK	2844.42	Mammalia	Class	Eukaryota	Metazoa	Chordata	Mammalia
ASLYNALPLESVK	7435.71	Bacteroidales	Order	Bacteria		Bacteroidetes	Bacteroidia	Bacteroidales
ASMATIINPDDKNAVEAALTLK	936.753	Butyricicoccus pullicaecorum	Species	Bacteria		Firmicutes	Clostridia	Clostridiales	Clostridiaceae	Butyricicoccus	Butyricicoccus pullicaecorum
ASMAYGDTTVQDK	14539.9	Lachnospiraceae bacterium MD335	Species	Bacteria		Firmicutes	Clostridia	Clostridiales	Lachnospiraceae		Lachnospiraceae bacterium MD335
ASMGALQNR	27319.6	Legionella	Genus	Bacteria		Proteobacteria	Gammaproteobacteria	Legionellales	Legionellaceae	Legionella
ASMPGMMDTVLNLGLNDVSVK	266.703	Clostridium sp. MD294	Species	Bacteria		Firmicutes	Clostridia	Clostridiales	Clostridiaceae	Clostridium	Clostridium sp. MD294
ASMWVTIR	3220.2	Rodentia	Order	Eukaryota	Metazoa	Chordata	Mammalia	Rodentia
ASNFWPVK	4341.46	Lachnospiraceae bacterium A4	Species	Bacteria		Firmicutes	Clostridia	Clostridiales	Lachnospiraceae		Lachnospiraceae bacterium A4
ASNGVIIITTK	1897.71	Bacteria	Superkingdom	Bacteria
ASNIGQVAQFAAAGK	47206.2	Bacteria	Superkingdom	Bacteria
ASNLESGIPAR	34058.8	Mus musculus	Species	Eukaryota	Metazoa	Chordata	Mammalia	Rodentia	Muridae	Mus	Mus musculus
ASNSEDPPSVVEVR	2896.18	Muridae	Family	Eukaryota	Metazoa	Chordata	Mammalia	Rodentia	Muridae
ASNTSEVYFDGVK	2141.9	Muridae	Family	Eukaryota	Metazoa	Chordata	Mammalia	Rodentia	Muridae
ASNYIIR	44007.8	Mus musculus	Species	Eukaryota	Metazoa	Chordata	Mammalia	Rodentia	Muridae	Mus	Mus musculus
ASPLVTGEYR	8992.8	Butyricicoccus pullicaecorum	Species	Bacteria		Firmicutes	Clostridia	Clostridiales	Clostridiaceae	Butyricicoccus	Butyricicoccus pullicaecorum
ASPVLLEPIMK	7113.77	Bacteria	Superkingdom	Bacteria
ASQDIGSSLNWLQQEPDGTIK	2177.89	Metazoa	Kingdom	Eukaryota	Metazoa
ASQDIGSSLNWLQQEPDGTIKR	8146.82	Metazoa	Kingdom	Eukaryota	Metazoa
ASQDINSYLSWFQQKPGK	1544.52	Metazoa	Kingdom	Eukaryota	Metazoa
ASQDISNYLNWYQQKPDGTVK	21896.8	Metazoa	Kingdom	Eukaryota	Metazoa
ASQGILTVR	176848	Firmicutes	Phylum	Bacteria		Firmicutes
ASQLASDYITITK	5033.54	Clostridiales	Order	Bacteria		Firmicutes	Clostridia	Clostridiales
ASQRPDVLTTGGGNPIGDK	855.107	Mus musculus	Species	Eukaryota	Metazoa	Chordata	Mammalia	Rodentia	Muridae	Mus	Mus musculus
ASSEGGAATGAGLDSLHK	2372.59	Metazoa	Kingdom	Eukaryota	Metazoa
ASSILYDAFGIIQDK	1444.72	Lactobacillus	Genus	Bacteria		Firmicutes	Bacilli	Lactobacillales	Lactobacillaceae	Lactobacillus
ASSPQVGSGTTYLPK	58588.9	Lachnospiraceae bacterium A4	Species	Bacteria		Firmicutes	Clostridia	Clostridiales	Lachnospiraceae		Lachnospiraceae bacterium A4
ASSVLALLYGVK	3278.61	Dorea	Genus	Bacteria		Firmicutes	Clostridia	Clostridiales	Lachnospiraceae	Dorea
ASSYWPVK	5412.3	Clostridiales	Order	Bacteria		Firmicutes	Clostridia	Clostridiales
ASTVASIVK	11016.8	Firmicutes	Phylum	Bacteria		Firmicutes
ASTYLFEATEK	160748	Mus musculus	Species	Eukaryota	Metazoa	Chordata	Mammalia	Rodentia	Muridae	Mus	Mus musculus
ASTYLFEATEKR	46558.5	Mus musculus	Species	Eukaryota	Metazoa	Chordata	Mammalia	Rodentia	Muridae	Mus	Mus musculus
ASVDAAASAVAR	8562.32	Dorea sp. 5-2	Species	Bacteria		Firmicutes	Clostridia	Clostridiales	Lachnospiraceae	Dorea	Dorea sp. 5-2
ASVDFTDTYVK	3059.78	Clostridium sp. MD294	Species	Bacteria		Firmicutes	Clostridia	Clostridiales	Clostridiaceae	Clostridium	Clostridium sp. MD294
ASVNGVPVTQFASK	2365.45	Alistipes putredinis	Species	Bacteria		Bacteroidetes	Bacteroidia	Bacteroidales	Rikenellaceae	Alistipes	Alistipes putredinis
ASVPSGASTGENEALELR	20591.8	Bacteria	Superkingdom	Bacteria
ASVPSGASTGVNEALELR	157480	Bacteroides	Genus	Bacteria		Bacteroidetes	Bacteroidia	Bacteroidales	Bacteroidaceae	Bacteroides
ASVPSGASTGVNEALELRDGDK	7672.44	Bacteroides	Genus	Bacteria		Bacteroidetes	Bacteroidia	Bacteroidales	Bacteroidaceae	Bacteroides
ASVVVYDAEVK	36394.4	Lachnospiraceae bacterium A4	Species	Bacteria		Firmicutes	Clostridia	Clostridiales	Lachnospiraceae		Lachnospiraceae bacterium A4
ASWAMNMAEK	8281.61	Hungateiclostridiaceae bacterium KB18	Species	Bacteria		Firmicutes	Clostridia	Clostridiales	Hungateiclostridiaceae		Hungateiclostridiaceae bacterium KB18
ASWDEALDLVASK	2745.4	Bacteria	Superkingdom	Bacteria
ASYAVSEAIPK	1840.62	Mammalia	Class	Eukaryota	Metazoa	Chordata	Mammalia
ASYGTVGNQDIDWYAAR	478.091	Bacteroidales	Order	Bacteria		Bacteroidetes	Bacteroidia	Bacteroidales
ASYPEAPLVMGNTTVGPGIK	835.953	Mus musculus	Species	Eukaryota	Metazoa	Chordata	Mammalia	Rodentia	Muridae	Mus	Mus musculus
ASYPQSVPIPFR	4204.95	Mammalia	Class	Eukaryota	Metazoa	Chordata	Mammalia
ATAALEGMK	3876.03	Alistipes	Genus	Bacteria		Bacteroidetes	Bacteroidia	Bacteroidales	Rikenellaceae	Alistipes
ATAAPTYPLGTDLEISK	8721.62	Lachnospiraceae bacterium MD335	Species	Bacteria		Firmicutes	Clostridia	Clostridiales	Lachnospiraceae		Lachnospiraceae bacterium MD335
ATAEALGLR	13895.9	Firmicutes	Phylum	Bacteria		Firmicutes
ATAENEFVALK	2352.13	Mammalia	Class	Eukaryota	Metazoa	Chordata	Mammalia
ATAENEFVALKK	833.05	Mammalia	Class	Eukaryota	Metazoa	Chordata	Mammalia
ATAGSYISSLR	6831.03	Metazoa	Kingdom	Eukaryota	Metazoa
ATAIQPITGVSDSLEGDNK	4214.86	Lachnospiraceae bacterium A4	Species	Bacteria		Firmicutes	Clostridia	Clostridiales	Lachnospiraceae		Lachnospiraceae bacterium A4
ATANNAGDSYNQAR	1211.56	Lachnospiraceae bacterium A4	Species	Bacteria		Firmicutes	Clostridia	Clostridiales	Lachnospiraceae		Lachnospiraceae bacterium A4
ATAVMPDGQFK	16594.8	Metazoa	Kingdom	Eukaryota	Metazoa
ATAVTVEAYPVR	3063.5	Lachnospiraceae bacterium A4	Species	Bacteria		Firmicutes	Clostridia	Clostridiales	Lachnospiraceae		Lachnospiraceae bacterium A4
ATDAIDTISAAIR	20849.3	Lachnospiraceae bacterium MD335	Species	Bacteria		Firmicutes	Clostridia	Clostridiales	Lachnospiraceae		Lachnospiraceae bacterium MD335
ATDAIDTISAAIRK	3035.05	Lachnospiraceae bacterium MD335	Species	Bacteria		Firmicutes	Clostridia	Clostridiales	Lachnospiraceae		Lachnospiraceae bacterium MD335
ATDDITLLPFK	2804.69	Mus musculus	Species	Eukaryota	Metazoa	Chordata	Mammalia	Rodentia	Muridae	Mus	Mus musculus
ATDFGVSMK	9523.44	Lachnospiraceae	Family	Bacteria		Firmicutes	Clostridia	Clostridiales	Lachnospiraceae
ATDFVVDR	8731.33	Eukaryota	Superkingdom	Eukaryota
ATDKPFLMPVEDVFTITGR	2338.59	Bacteria	Superkingdom	Bacteria
ATDQPFLMPVEDVFSITGR	3851.4	Bacteria	Superkingdom	Bacteria
ATDQSAEDTYQALSK	1479.64	Bacteria	Superkingdom	Bacteria
ATDSALNVR	27721	Mucispirillum schaedleri	Species	Bacteria		Deferribacteres	Deferribacteres	Deferribacterales	Deferribacteraceae	Mucispirillum	Mucispirillum schaedleri
ATDVAVEAIAK	6476.23	Clostridiales	Order	Bacteria		Firmicutes	Clostridia	Clostridiales
ATEAAVDAIAK	9730.99	Hungatella hathewayi	Species	Bacteria		Firmicutes	Clostridia	Clostridiales	Clostridiaceae	Hungatella	Hungatella hathewayi
ATEDLGPYVK	31267.9	Lachnospiraceae bacterium A4	Species	Bacteria		Firmicutes	Clostridia	Clostridiales	Lachnospiraceae		Lachnospiraceae bacterium A4
ATEGMVVADK	4830.04	Chordata	Phylum	Eukaryota	Metazoa	Chordata
ATEIPEAIR	180327	Firmicutes	Phylum	Bacteria		Firmicutes
ATEIPEAIRK	99121.8	Firmicutes	Phylum	Bacteria		Firmicutes
ATETAVEAIAK	4456.82	Bacteria	Superkingdom	Bacteria
ATETVYSEVK	3818.44	Mus musculus	Species	Eukaryota	Metazoa	Chordata	Mammalia	Rodentia	Muridae	Mus	Mus musculus
ATEVAVEALKK	2791.13	Bacteria	Superkingdom	Bacteria
ATEVPLSWESFNK	3251.11	Chordata	Phylum	Eukaryota	Metazoa	Chordata
ATFDSGTGLLMK	4670.71	Mus musculus	Species	Eukaryota	Metazoa	Chordata	Mammalia	Rodentia	Muridae	Mus	Mus musculus
ATFEVNGK	3507.32	Clostridium sp. MD294	Species	Bacteria		Firmicutes	Clostridia	Clostridiales	Clostridiaceae	Clostridium	Clostridium sp. MD294
ATFQAYQILIGK	1564.84	Mammalia	Class	Eukaryota	Metazoa	Chordata	Mammalia
ATFTEENGYK	12743.9	Firmicutes bacterium ASF500	Species	Bacteria		Firmicutes					Firmicutes bacterium ASF500
ATFYGEQVDYYK	1537.56	Chordata	Phylum	Eukaryota	Metazoa	Chordata
ATGMVVQFEGMPSYGGLAGR	1911.16	Fusobacterium	Genus	Bacteria		Fusobacteria	Fusobacteriia	Fusobacteriales	Fusobacteriaceae	Fusobacterium
ATGPPVSELITK	3880.64	Mammalia	Class	Eukaryota	Metazoa	Chordata	Mammalia
ATGSDWYK	20037.3	Lachnospiraceae bacterium A4	Species	Bacteria		Firmicutes	Clostridia	Clostridiales	Lachnospiraceae		Lachnospiraceae bacterium A4
ATGSLYIAK	5265.42	Firmicutes	Phylum	Bacteria		Firmicutes
ATGYELEGIAK	10171.7	Clostridiales	Order	Bacteria		Firmicutes	Clostridia	Clostridiales
ATIAALGELR	7784.25	Bacteroidales	Order	Bacteria		Bacteroidetes	Bacteroidia	Bacteroidales
ATIDSGWLSADHQVGQTGK	30673.4	Firmicutes	Phylum	Bacteria		Firmicutes
ATIDTGIK	14247.1	Paeniclostridium sordellii	Species	Bacteria		Firmicutes	Clostridia	Clostridiales	Peptostreptococcaceae	Paeniclostridium	Paeniclostridium sordellii
ATIGQVSNTEHENLK	3181.49	Mucispirillum schaedleri	Species	Bacteria		Deferribacteres	Deferribacteres	Deferribacterales	Deferribacteraceae	Mucispirillum	Mucispirillum schaedleri
ATIGSVGNSDHALESSGK	1200.51	Bacteroidetes	Phylum	Bacteria		Bacteroidetes
ATIIYVTHDQTEAMTLGTR	4852.03	Clostridiales	Order	Bacteria		Firmicutes	Clostridia	Clostridiales
ATILGYLQR	21528.8	Lachnospiraceae bacterium MD335	Species	Bacteria		Firmicutes	Clostridia	Clostridiales	Lachnospiraceae		Lachnospiraceae bacterium MD335
ATITATVK	16475.9	Eubacterium sp. 14-2	Species	Bacteria		Firmicutes	Clostridia	Clostridiales	Eubacteriaceae	Eubacterium	Eubacterium sp. 14-2
ATIVNYLR	7415.88	Bacteroidales	Order	Bacteria		Bacteroidetes	Bacteroidia	Bacteroidales
ATLDEYEFPGDDTPIIK	2079.45	Ruminococcus	Genus	Bacteria		Firmicutes	Clostridia	Clostridiales	Ruminococcaceae	Ruminococcus
ATLDFVNWMISSDAGK	2368.35	Lachnospiraceae	Family	Bacteria		Firmicutes	Clostridia	Clostridiales	Lachnospiraceae
ATLESLAYQTNDVLK	3418.95	Eubacterium	Genus	Bacteria		Firmicutes	Clostridia	Clostridiales	Eubacteriaceae	Eubacterium
ATLGINDTLIR	3127.45	Mus musculus	Species	Eukaryota	Metazoa	Chordata	Mammalia	Rodentia	Muridae	Mus	Mus musculus
ATLIVSNDASEDAIYELTK	821.897	Anaerotruncus sp. G3(2012)	Species	Bacteria		Firmicutes	Clostridia	Clostridiales	Ruminococcaceae	Anaerotruncus	Anaerotruncus sp. G3(2012)
ATLTGMTQYPANTESDPNNR	2555.22	Lachnospiraceae bacterium A4	Species	Bacteria		Firmicutes	Clostridia	Clostridiales	Lachnospiraceae		Lachnospiraceae bacterium A4
ATLTVVGDGVNYFGSK	1682.03	Lachnospiraceae bacterium MD335	Species	Bacteria		Firmicutes	Clostridia	Clostridiales	Lachnospiraceae		Lachnospiraceae bacterium MD335
ATLVDGSYHPVDSSEIAFK	4823.23	Firmicutes	Phylum	Bacteria		Firmicutes
ATLYDGSYHPVDSSEMAFK	3224.6	Firmicutes	Phylum	Bacteria		Firmicutes
ATMDGLANMK	5015.84	Lactobacillus	Genus	Bacteria		Firmicutes	Bacilli	Lactobacillales	Lactobacillaceae	Lactobacillus
ATMEAYSR	12069.2	Mammalia	Class	Eukaryota	Metazoa	Chordata	Mammalia
ATMQNLNDR	2034.65	Metazoa	Kingdom	Eukaryota	Metazoa
ATNGEDTPSEEEINEK	660.312	Lachnospiraceae	Family	Bacteria		Firmicutes	Clostridia	Clostridiales	Lachnospiraceae
ATNNYEYTYYR	5927.84	Eubacterium sp. 14-2	Species	Bacteria		Firmicutes	Clostridia	Clostridiales	Eubacteriaceae	Eubacterium	Eubacterium sp. 14-2
ATNTMPENPALVTTIVTTNMTKPITEAYNVK	274.174	Lachnospiraceae bacterium MD335	Species	Bacteria		Firmicutes	Clostridia	Clostridiales	Lachnospiraceae		Lachnospiraceae bacterium MD335
ATPEGIDEYIGTGPYK	3147.34	Dorea sp. 5-2	Species	Bacteria		Firmicutes	Clostridia	Clostridiales	Lachnospiraceae	Dorea	Dorea sp. 5-2
ATPLGAVAQFAAAGK	3737.55	Desulfovibrio desulfuricans	Species	Bacteria		Proteobacteria	Deltaproteobacteria	Desulfovibrionales	Desulfovibrionaceae	Desulfovibrio	Desulfovibrio desulfuricans
ATPTGAIAQFAAAGK	4408.03	Firmicutes	Phylum	Bacteria		Firmicutes
ATPTGATAQFAAGGK	3031.82	Roseburia	Genus	Bacteria		Firmicutes	Clostridia	Clostridiales	Lachnospiraceae	Roseburia
ATPTGAVAQFAAGGKDVK	1674.47	Clostridiales	Order	Bacteria		Firmicutes	Clostridia	Clostridiales
ATQEWLK	3947.87	Proteobacteria	Phylum	Bacteria		Proteobacteria
ATQGLANYIIK	18751.4	Bacteria	Superkingdom	Bacteria
ATSENLVFYDENVDR	135953	Mus musculus	Species	Eukaryota	Metazoa	Chordata	Mammalia	Rodentia	Muridae	Mus	Mus musculus
ATSLNSNDVFILK	10510	Mammalia	Class	Eukaryota	Metazoa	Chordata	Mammalia
ATSNVFAMFDQSQIQEFK	1219.72	Metazoa	Kingdom	Eukaryota	Metazoa
ATSPLTSSTSDSQDLDLAILDSVMGQLDASR	273.643	Mus musculus	Species	Eukaryota	Metazoa	Chordata	Mammalia	Rodentia	Muridae	Mus	Mus musculus
ATSTMTFSHYAEVSSSIAK	1585.31	Porphyromonas endodontalis	Species	Bacteria		Bacteroidetes	Bacteroidia	Bacteroidales	Porphyromonadaceae	Porphyromonas	Porphyromonas endodontalis
ATTIKDAQGNPIVGTK	856.808	Lachnospiraceae bacterium A4	Species	Bacteria		Firmicutes	Clostridia	Clostridiales	Lachnospiraceae		Lachnospiraceae bacterium A4
ATTQDAEGMVAEGR	2258.64	Eubacterium plexicaudatum	Species	Bacteria		Firmicutes	Clostridia	Clostridiales	Eubacteriaceae	Eubacterium	Eubacterium plexicaudatum
ATTTDAEGMIK	16853.6	Firmicutes	Phylum	Bacteria		Firmicutes
ATTVDAEGMIAEGR	48635.9	Clostridiales	Order	Bacteria		Firmicutes	Clostridia	Clostridiales
ATTVPEVGESLWK	2349.22	Mucispirillum schaedleri	Species	Bacteria		Deferribacteres	Deferribacteres	Deferribacterales	Deferribacteraceae	Mucispirillum	Mucispirillum schaedleri
ATTWNAADFGYFR	10012.2	Lachnospiraceae bacterium 28-4	Species	Bacteria		Firmicutes	Clostridia	Clostridiales	Lachnospiraceae		Lachnospiraceae bacterium 28-4
ATTWNYADLGYFR	2380.99	Firmicutes	Phylum	Bacteria		Firmicutes
ATVAVKPEVK	1991.77	Anaerotruncus sp. G3(2012)	Species	Bacteria		Firmicutes	Clostridia	Clostridiales	Ruminococcaceae	Anaerotruncus	Anaerotruncus sp. G3(2012)
ATVDTFTVK	70918.1	Lachnospiraceae bacterium MD335	Species	Bacteria		Firmicutes	Clostridia	Clostridiales	Lachnospiraceae		Lachnospiraceae bacterium MD335
ATVEALGLK	6223.48	Firmicutes	Phylum	Bacteria		Firmicutes
ATVEALGLKK	2759.56	Firmicutes	Phylum	Bacteria		Firmicutes
ATVEAMGLTK	57088.8	Firmicutes	Phylum	Bacteria		Firmicutes
ATVEDIQK	14482.5	Bacteria	Superkingdom	Bacteria
ATVFFVEK	8897.59	Bacteria	Superkingdom	Bacteria
ATVGTVSNPDHSLER	2999.17	Odoribacter splanchnicus	Species	Bacteria		Bacteroidetes	Bacteroidia	Bacteroidales	Odoribacteraceae	Odoribacter	Odoribacter splanchnicus
ATVGVVGNSEHSLER	44933.3	Prevotella	Genus	Bacteria		Bacteroidetes	Bacteroidia	Bacteroidales	Prevotellaceae	Prevotella
ATVGVVSNIDHNLESSGK	2098.51	Alistipes	Genus	Bacteria		Bacteroidetes	Bacteroidia	Bacteroidales	Rikenellaceae	Alistipes
ATVIEYGK	15918.7	Lachnospiraceae	Family	Bacteria		Firmicutes	Clostridia	Clostridiales	Lachnospiraceae
ATVINLQYDPNR	5733.9	Flavonifractor plautii	Species	Bacteria		Firmicutes	Clostridia	Clostridiales	Ruminococcaceae	Flavonifractor	Flavonifractor plautii
ATVITTPWDELDGKK	2008.65	Roseburia	Genus	Bacteria		Firmicutes	Clostridia	Clostridiales	Lachnospiraceae	Roseburia
ATVNKVELSDTATAK	1997.88	Clostridium sp. MD294	Species	Bacteria		Firmicutes	Clostridia	Clostridiales	Clostridiaceae	Clostridium	Clostridium sp. MD294
ATVSVKPEVK	2910.78	Lactobacillus	Genus	Bacteria		Firmicutes	Bacilli	Lactobacillales	Lactobacillaceae	Lactobacillus
ATVVDGDGNALK	5337.71	Lachnospiraceae bacterium MD335	Species	Bacteria		Firmicutes	Clostridia	Clostridiales	Lachnospiraceae		Lachnospiraceae bacterium MD335
ATYDKIPER	2973.3	Bacteroidales	Order	Bacteria		Bacteroidetes	Bacteroidia	Bacteroidales
ATYVQAIR	5950.14	Burkholderiaceae bacterium PBA	Species	Bacteria		Proteobacteria	Betaproteobacteria	Burkholderiales	Burkholderiaceae		Burkholderiaceae bacterium PBA
ATYYGIAMSVR	838.643	Bacteria	Superkingdom	Bacteria
AVAAGYWNLFSYNPALK	1606.39	Roseburia	Genus	Bacteria		Firmicutes	Clostridia	Clostridiales	Lachnospiraceae	Roseburia
AVAAMPIAGGYR	23013.8	Clostridiales	Order	Bacteria		Firmicutes	Clostridia	Clostridiales
AVADSIQANADDLGVK	8194.96	Lachnospiraceae bacterium MD335	Species	Bacteria		Firmicutes	Clostridia	Clostridiales	Lachnospiraceae		Lachnospiraceae bacterium MD335
AVADSIQENADDLGVK	3403.41	Lachnospiraceae bacterium A4	Species	Bacteria		Firmicutes	Clostridia	Clostridiales	Lachnospiraceae		Lachnospiraceae bacterium A4
AVAEAADNLNIK	10633.7	Lactobacillus	Genus	Bacteria		Firmicutes	Bacilli	Lactobacillales	Lactobacillaceae	Lactobacillus
AVAEDIHSR	8020.7	Firmicutes	Phylum	Bacteria		Firmicutes
AVAEETAADYFYMFDAIK	734.188	Lachnospiraceae bacterium MD335	Species	Bacteria		Firmicutes	Clostridia	Clostridiales	Lachnospiraceae		Lachnospiraceae bacterium MD335
AVAELSDATTVIGGGDSVNAVK	7461.2	Clostridiales	Order	Bacteria		Firmicutes	Clostridia	Clostridiales
AVAELSDATTVIGGGDSVNAVKR	5232.31	Clostridiales	Order	Bacteria		Firmicutes	Clostridia	Clostridiales
AVAEPGIQLK	3077.65	Metazoa	Kingdom	Eukaryota	Metazoa
AVAFGEALQPEFR	7983.32	Bacteria	Superkingdom	Bacteria
AVAFQNSQTR	23820.2	Metazoa	Kingdom	Eukaryota	Metazoa
AVAGDASESALLK	27734.2	Chordata	Phylum	Eukaryota	Metazoa	Chordata
AVAGNISDPGLQK	2385.74	Chordata	Phylum	Eukaryota	Metazoa	Chordata
AVAMIDPR	15464.6	Firmicutes	Phylum	Bacteria		Firmicutes
AVAMIEPR	11221.1	Bacteria	Superkingdom	Bacteria
AVANAEIQDIPQAMLDDDTNR	269.896	Lactobacillus reuteri	Species	Bacteria		Firmicutes	Bacilli	Lactobacillales	Lactobacillaceae	Lactobacillus	Lactobacillus reuteri
AVANEAVVTLDLAK	7957.4	Clostridiales	Order	Bacteria		Firmicutes	Clostridia	Clostridiales
AVANVNDIIAK	23103.5	Bacteria	Superkingdom	Bacteria
AVANVNGPIAEALK	15112.6	Prevotella	Genus	Bacteria		Bacteroidetes	Bacteroidia	Bacteroidales	Prevotellaceae	Prevotella
AVANYDSVEAGEK	2141.71	Chordata	Phylum	Eukaryota	Metazoa	Chordata
AVAQALEVIPR	1600.68	Eukaryota	Superkingdom	Eukaryota
AVAQGNLSSADVQAAK	22861.9	Rodentia	Order	Eukaryota	Metazoa	Chordata	Mammalia	Rodentia
AVATAGNIDYEGETTPVTFEIVK	387.766	Lachnospiraceae bacterium MD335	Species	Bacteria		Firmicutes	Clostridia	Clostridiales	Lachnospiraceae		Lachnospiraceae bacterium MD335
AVATVVESLR	4029.68	Bacteria	Superkingdom	Bacteria
AVAWYDNEWGYSNR	1908.69	Bacteria	Superkingdom	Bacteria
AVDAAVEAIK	3736.87	Anaerotruncus sp. G3(2012)	Species	Bacteria		Firmicutes	Clostridia	Clostridiales	Ruminococcaceae	Anaerotruncus	Anaerotruncus sp. G3(2012)
AVDAAVEAIKENSK	589.192	Anaerotruncus sp. G3(2012)	Species	Bacteria		Firmicutes	Clostridia	Clostridiales	Ruminococcaceae	Anaerotruncus	Anaerotruncus sp. G3(2012)
AVDAGYWNMFR	3901.76	Clostridiales	Order	Bacteria		Firmicutes	Clostridia	Clostridiales
AVDDGVNTFK	4046.47	Metazoa	Kingdom	Eukaryota	Metazoa
AVDDSYNVQPDTVAPIWNLR	455.523	Mammalia	Class	Eukaryota	Metazoa	Chordata	Mammalia
AVDEALAK	5931.24	Bacteria	Superkingdom	Bacteria
AVDLQILPK	1281.7	Metazoa	Kingdom	Eukaryota	Metazoa
AVDLVADSAK	3228.36	Lactobacillus	Genus	Bacteria		Firmicutes	Bacilli	Lactobacillales	Lactobacillaceae	Lactobacillus
AVDPDSPAEASGLR	23312	Mammalia	Class	Eukaryota	Metazoa	Chordata	Mammalia
AVDPNVASEYSYMLSDIGQIK	321.562	Lachnospiraceae bacterium MD335	Species	Bacteria		Firmicutes	Clostridia	Clostridiales	Lachnospiraceae		Lachnospiraceae bacterium MD335
AVDQWSTETIASHEDIER	15619.5	Mus musculus	Species	Eukaryota	Metazoa	Chordata	Mammalia	Rodentia	Muridae	Mus	Mus musculus
AVEAAVAEVK	14518	Bacteria	Superkingdom	Bacteria
AVEAAVAEVKK	2852.36	Oscillibacter	Genus	Bacteria		Firmicutes	Clostridia	Clostridiales	Oscillospiraceae	Oscillibacter
AVEAIAGMSSK	10927.5	Lachnospiraceae bacterium MD308	Species	Bacteria		Firmicutes	Clostridia	Clostridiales	Lachnospiraceae		Lachnospiraceae bacterium MD308
AVEAVIAELQK	5884.76	Mucispirillum schaedleri	Species	Bacteria		Deferribacteres	Deferribacteres	Deferribacterales	Deferribacteraceae	Mucispirillum	Mucispirillum schaedleri
AVEFSTLQR	29414.6	Firmicutes	Phylum	Bacteria		Firmicutes
AVEGAVLVTK	3267.29	Lactobacillaceae	Family	Bacteria		Firmicutes	Bacilli	Lactobacillales	Lactobacillaceae
AVEGTDYEDLR	3737.87	Lactobacillus	Genus	Bacteria		Firmicutes	Bacilli	Lactobacillales	Lactobacillaceae	Lactobacillus
AVEIPEAIR	195918	Firmicutes	Phylum	Bacteria		Firmicutes
AVEIPEAIRK	77542.1	Firmicutes	Phylum	Bacteria		Firmicutes
AVELAANTK	28989.9	Metazoa	Kingdom	Eukaryota	Metazoa
AVELSYEGHR	10070	Bacteroidetes	Phylum	Bacteria		Bacteroidetes
AVENAEIGEIPGAMIEEDVHR	1118.07	Lactobacillus	Genus	Bacteria		Firmicutes	Bacilli	Lactobacillales	Lactobacillaceae	Lactobacillus
AVENELLDR	6065.62	Mus musculus	Species	Eukaryota	Metazoa	Chordata	Mammalia	Rodentia	Muridae	Mus	Mus musculus
AVENSSTAIGIR	8093.12	Chordata	Phylum	Eukaryota	Metazoa	Chordata
AVEPDEEEGKVLGAYDK	19177.2	Lachnospiraceae bacterium 28-4	Species	Bacteria		Firmicutes	Clostridia	Clostridiales	Lachnospiraceae		Lachnospiraceae bacterium 28-4
AVEPVADIEK	5056.1	Lachnospiraceae bacterium 28-4	Species	Bacteria		Firmicutes	Clostridia	Clostridiales	Lachnospiraceae		Lachnospiraceae bacterium 28-4
AVEQTNLAR	47569.2	Lachnospiraceae	Family	Bacteria		Firmicutes	Clostridia	Clostridiales	Lachnospiraceae
AVEVGEMEPEELGVK	1809.22	Dorea sp. 5-2	Species	Bacteria		Firmicutes	Clostridia	Clostridiales	Lachnospiraceae	Dorea	Dorea sp. 5-2
AVFAADIEK	15957.6	Lachnospiraceae bacterium MD335	Species	Bacteria		Firmicutes	Clostridia	Clostridiales	Lachnospiraceae		Lachnospiraceae bacterium MD335
AVFALEMDR	19527.6	Lachnospiraceae bacterium M18-1	Species	Bacteria		Firmicutes	Clostridia	Clostridiales	Lachnospiraceae		Lachnospiraceae bacterium M18-1
AVFDETYPDPVR	1261.59	Metazoa	Kingdom	Eukaryota	Metazoa
AVFPSIVGR	38123.4	Eukaryota	Superkingdom	Eukaryota
AVFPVNAEVSADGK	19139.1	Lachnospiraceae bacterium A4	Species	Bacteria		Firmicutes	Clostridia	Clostridiales	Lachnospiraceae		Lachnospiraceae bacterium A4
AVFQANQENLPILK	15016.6	Chordata	Phylum	Eukaryota	Metazoa	Chordata
AVFQYIDENQDR	27997.7	Muridae	Family	Eukaryota	Metazoa	Chordata	Mammalia	Rodentia	Muridae
AVFTADDAEAWAAR	3109.67	Lachnospiraceae bacterium MD335	Species	Bacteria		Firmicutes	Clostridia	Clostridiales	Lachnospiraceae		Lachnospiraceae bacterium MD335
AVGELLQNQYR	63297.2	Bacteria	Superkingdom	Bacteria
AVGESVQKPLDYYR	2104.95	Chordata	Phylum	Eukaryota	Metazoa	Chordata
AVGPSLDLLR	12124.1	Mammalia	Class	Eukaryota	Metazoa	Chordata	Mammalia
AVGSTNITFVSK	1141.2	Lactobacillus murinus	Species	Bacteria		Firmicutes	Bacilli	Lactobacillales	Lactobacillaceae	Lactobacillus	Lactobacillus murinus
AVIAGNWK	3699.47	Bacteria	Superkingdom	Bacteria
AVIAPSGVEK	4394.21	Mus musculus	Species	Eukaryota	Metazoa	Chordata	Mammalia	Rodentia	Muridae	Mus	Mus musculus
AVIATESALK	13526.3	Bacteroidales	Order	Bacteria		Bacteroidetes	Bacteroidia	Bacteroidales
AVIAYEPIWAIGTGK	2789.83	Firmicutes	Phylum	Bacteria		Firmicutes
AVIEEFNPGFTPDNK	16137.7	Clostridiales	Order	Bacteria		Firmicutes	Clostridia	Clostridiales
AVIELAGIK	14195.6	Bacteria	Superkingdom	Bacteria
AVIEMAGIK	26676.6	Clostridiales	Order	Bacteria		Firmicutes	Clostridia	Clostridiales
AVIGLDVTDQR	8354.71	Lactobacillus	Genus	Bacteria		Firmicutes	Bacilli	Lactobacillales	Lactobacillaceae	Lactobacillus
AVINTVPYDVVHR	1030.27	Chordata	Phylum	Eukaryota	Metazoa	Chordata
AVITATQMLDSMQENPRPTR	2833.82	Lactobacillus	Genus	Bacteria		Firmicutes	Bacilli	Lactobacillales	Lactobacillaceae	Lactobacillus
AVITYEDEAGNETR	4162.35	Lachnospiraceae bacterium A4	Species	Bacteria		Firmicutes	Clostridia	Clostridiales	Lachnospiraceae		Lachnospiraceae bacterium A4
AVITYEDEAGNETRFEK	2654.77	Lachnospiraceae bacterium A4	Species	Bacteria		Firmicutes	Clostridia	Clostridiales	Lachnospiraceae		Lachnospiraceae bacterium A4
AVIVITSNR	3736.6	Firmicutes	Phylum	Bacteria		Firmicutes
AVKEDDSPVGTWSGTYEK	6258.47	Mus musculus	Species	Eukaryota	Metazoa	Chordata	Mammalia	Rodentia	Muridae	Mus	Mus musculus
AVKETEDIMEAK	5499.8	Eubacterium sp. 14-2	Species	Bacteria		Firmicutes	Clostridia	Clostridiales	Eubacteriaceae	Eubacterium	Eubacterium sp. 14-2
AVLDALDR	7834.51	Bacteria	Superkingdom	Bacteria
AVLDGDEWILNGSK	3137.96	Eubacterium	Genus	Bacteria		Firmicutes	Clostridia	Clostridiales	Eubacteriaceae	Eubacterium
AVLDGDEWVLNGSK	30832.3	Bacteria	Superkingdom	Bacteria
AVLDVAETGTEAAAATGVIGGIR	13279.5	Mus musculus	Species	Eukaryota	Metazoa	Chordata	Mammalia	Rodentia	Muridae	Mus	Mus musculus
AVLDVAETGTEAAAATGVIGGIRK	823.575	Mus musculus	Species	Eukaryota	Metazoa	Chordata	Mammalia	Rodentia	Muridae	Mus	Mus musculus
AVLDVAETGTEAAAATGVK	4940.57	Rodentia	Order	Eukaryota	Metazoa	Chordata	Mammalia	Rodentia
AVLEGDEWVLNGSK	23090.2	Firmicutes	Phylum	Bacteria		Firmicutes
AVLELAGFK	3417.91	Clostridiales	Order	Bacteria		Firmicutes	Clostridia	Clostridiales
AVLESVGITDVLAK	25395.3	Bacteroidetes	Phylum	Bacteria		Bacteroidetes
AVLESVGVTDVLAK	8658.7	Bacteria	Superkingdom	Bacteria
AVLEVTGGR	7344.18	Burkholderiaceae	Family	Bacteria		Proteobacteria	Betaproteobacteria	Burkholderiales	Burkholderiaceae
AVLFNYR	2812.76	Rodentia	Order	Eukaryota	Metazoa	Chordata	Mammalia	Rodentia
AVLFTYDQYQEK	753.479	Mammalia	Class	Eukaryota	Metazoa	Chordata	Mammalia
AVLGIEFGSTR	3441.94	Bacteria	Superkingdom	Bacteria
AVLTDIQDGVFAGR	7166.96	Firmicutes bacterium ASF500	Species	Bacteria		Firmicutes					Firmicutes bacterium ASF500
AVLVDLEPGTMDSVR	5490.27	Eukaryota	Superkingdom	Eukaryota
AVLVYGQMNEPPGAR	17237.7	Proteobacteria	Phylum	Bacteria		Proteobacteria
AVLWAVEK	7184.74	Bacteria	Superkingdom	Bacteria
AVMAAAEIDGPVYIR	844.451	Clostridiales	Order	Bacteria		Firmicutes	Clostridia	Clostridiales
AVMEAAGIR	10987.9	Bacteria	Superkingdom	Bacteria
AVMEAAIEVK	8770.3	Firmicutes	Phylum	Bacteria		Firmicutes
AVMEAAIEVKEEK	659.936	Lachnospiraceae bacterium 28-4	Species	Bacteria		Firmicutes	Clostridia	Clostridiales	Lachnospiraceae		Lachnospiraceae bacterium 28-4
AVMEALDGLPPVK	3468.13	Bacteria	Superkingdom	Bacteria
AVMELAGVADVTSK	2648.15	Lactobacillales	Order	Bacteria		Firmicutes	Bacilli	Lactobacillales
AVNAGGVATSGLEMTQNAQK	1374.75	Alistipes finegoldii	Species	Bacteria		Bacteroidetes	Bacteroidia	Bacteroidales	Rikenellaceae	Alistipes	Alistipes finegoldii
AVNAGGVATSGLEMTQNSQK	3341.62	Alistipes shahii	Species	Bacteria		Bacteroidetes	Bacteroidia	Bacteroidales	Rikenellaceae	Alistipes	Alistipes shahii
AVNAGGVAVSALEMAQNSMR	1369.99	Firmicutes	Phylum	Bacteria		Firmicutes
AVNAGGVAVSALEMSQNSER	17932.8	Firmicutes	Phylum	Bacteria		Firmicutes
AVNAGGVAVSALEMSQNSMR	2230.34	Bacillus sporothermodurans	Species	Bacteria		Firmicutes	Bacilli	Bacillales	Bacillaceae	Bacillus	Bacillus sporothermodurans
AVNAGGVAVSGLEMSQNSGR	10048.2	Anaerotruncus sp. G3(2012)	Species	Bacteria		Firmicutes	Clostridia	Clostridiales	Ruminococcaceae	Anaerotruncus	Anaerotruncus sp. G3(2012)
AVNAGGVGVSAMEMSQNSER	2375.35	Firmicutes	Phylum	Bacteria		Firmicutes
AVNAGGVLVSGLEMSQNSER	18534.2	Clostridiales	Order	Bacteria		Firmicutes	Clostridia	Clostridiales
AVNAGGVSVSELEMAQNAER	5351.54	Firmicutes	Phylum	Bacteria		Firmicutes
AVNLSMLK	2573.67	Bacteroidetes	Phylum	Bacteria		Bacteroidetes
AVNPINLYGGTK	9667.5	Bacteria	Superkingdom	Bacteria
AVNPSMLK	9665.67	Bacteroidetes	Phylum	Bacteria		Bacteroidetes
AVNQQTAVQPPATVR	292929	Mus musculus	Species	Eukaryota	Metazoa	Chordata	Mammalia	Rodentia	Muridae	Mus	Mus musculus
AVPIYQTSSFVFK	3236.32	Bacteria	Superkingdom	Bacteria
AVPIYQTSSFVFR	1787.11	Bacteria	Superkingdom	Bacteria
AVPQLQGYLR	3938.28	Metazoa	Kingdom	Eukaryota	Metazoa
AVPSDGNFSMR	6340.99	Mus musculus	Species	Eukaryota	Metazoa	Chordata	Mammalia	Rodentia	Muridae	Mus	Mus musculus
AVPTWGVFLDAEK	4869.82	Firmicutes	Phylum	Bacteria		Firmicutes
AVPVIGNIQLLK	9331.79	Lachnospiraceae bacterium MD335	Species	Bacteria		Firmicutes	Clostridia	Clostridiales	Lachnospiraceae		Lachnospiraceae bacterium MD335
AVPVSNIAPAAVGR	2247.87	Muridae	Family	Eukaryota	Metazoa	Chordata	Mammalia	Rodentia	Muridae
AVQAILQR	3288.84	Bacteria	Superkingdom	Bacteria
AVQDELQVR	13766.3	Hungateiclostridiaceae bacterium KB18	Species	Bacteria		Firmicutes	Clostridia	Clostridiales	Hungateiclostridiaceae		Hungateiclostridiaceae bacterium KB18
AVQDYMIR	23184.7	Bacteria	Superkingdom	Bacteria
AVQLFGGYGYTR	14505.5	Bacteria	Superkingdom	Bacteria
AVQQGTTVITVTSK	1099.85	Lachnospiraceae bacterium A4	Species	Bacteria		Firmicutes	Clostridia	Clostridiales	Lachnospiraceae		Lachnospiraceae bacterium A4
AVQTLQMELQQIMK	737.505	Chordata	Phylum	Eukaryota	Metazoa	Chordata
AVQVGFVDK	20307.6	Clostridiales	Order	Bacteria		Firmicutes	Clostridia	Clostridiales
AVSAVKPAETEVK	826.02	Lachnospiraceae bacterium MD335	Species	Bacteria		Firmicutes	Clostridia	Clostridiales	Lachnospiraceae		Lachnospiraceae bacterium MD335
AVSDTVDIMDAK	14414.8	Clostridium	Genus	Bacteria		Firmicutes	Clostridia	Clostridiales	Clostridiaceae	Clostridium
AVSELKAEDYSK	584.45	Lachnospiraceae bacterium 28-4	Species	Bacteria		Firmicutes	Clostridia	Clostridiales	Lachnospiraceae		Lachnospiraceae bacterium 28-4
AVSNIIASK	14111	Clostridiales	Order	Bacteria		Firmicutes	Clostridia	Clostridiales
AVSNTVDIMDAK	2255.12	Clostridium	Genus	Bacteria		Firmicutes	Clostridia	Clostridiales	Clostridiaceae	Clostridium
AVSNVNNIIAK	7570.51	Lactobacillus	Genus	Bacteria		Firmicutes	Bacilli	Lactobacillales	Lactobacillaceae	Lactobacillus
AVTAADMEAR	4889.25	Mammalia	Class	Eukaryota	Metazoa	Chordata	Mammalia
AVTDEEPFLIFANR	1417.09	Chordata	Phylum	Eukaryota	Metazoa	Chordata
AVTDGVDVVNMSLGSGYYTK	588.551	Lachnospiraceae bacterium A4	Species	Bacteria		Firmicutes	Clostridia	Clostridiales	Lachnospiraceae		Lachnospiraceae bacterium A4
AVTDYHTVK	29901.5	Lachnospiraceae bacterium A4	Species	Bacteria		Firmicutes	Clostridia	Clostridiales	Lachnospiraceae		Lachnospiraceae bacterium A4
AVTELNEPLSNEDR	2752.61	Chordata	Phylum	Eukaryota	Metazoa	Chordata
AVTEQGAELSNEER	1952.38	Chordata	Phylum	Eukaryota	Metazoa	Chordata
AVTEQGHELSNEER	2953.97	Chordata	Phylum	Eukaryota	Metazoa	Chordata
AVTLSGPDGYIYDPDGITTEEK	2040.6	Anaerotruncus sp. G3(2012)	Species	Bacteria		Firmicutes	Clostridia	Clostridiales	Ruminococcaceae	Anaerotruncus	Anaerotruncus sp. G3(2012)
AVVATSAAEANEK	9834.46	Lactobacillaceae	Family	Bacteria		Firmicutes	Bacilli	Lactobacillales	Lactobacillaceae
AVVATSAEEANSK	6904.45	Lactobacillus	Genus	Bacteria		Firmicutes	Bacilli	Lactobacillales	Lactobacillaceae	Lactobacillus
AVVDAGWK	38909.2	Bacteria	Superkingdom	Bacteria
AVVDEAPK	10228.2	Bacteria	Superkingdom	Bacteria
AVVDNGWMPK	11653.4	Clostridiales	Order	Bacteria		Firmicutes	Clostridia	Clostridiales
AVVEEFNPGFTPDDK	2195.38	Lachnospiraceae bacterium 28-4	Species	Bacteria		Firmicutes	Clostridia	Clostridiales	Lachnospiraceae		Lachnospiraceae bacterium 28-4
AVVEEFNPGFTPDNK	86675.2	Clostridiales	Order	Bacteria		Firmicutes	Clostridia	Clostridiales
AVVEKYPELTY	2015.42	Clostridiales	Order	Bacteria		Firmicutes	Clostridia	Clostridiales
AVVELAGIQNIR	1530.96	Clostridiales	Order	Bacteria		Firmicutes	Clostridia	Clostridiales
AVVGDVLDFNDVWDK	1802.52	Lachnospiraceae bacterium 28-4	Species	Bacteria		Firmicutes	Clostridia	Clostridiales	Lachnospiraceae		Lachnospiraceae bacterium 28-4
AVVLNDYFGTK	14511.1	Lachnospiraceae bacterium MD335	Species	Bacteria		Firmicutes	Clostridia	Clostridiales	Lachnospiraceae		Lachnospiraceae bacterium MD335
AVVLPISLATTFK	1396.49	Muridae	Family	Eukaryota	Metazoa	Chordata	Mammalia	Rodentia	Muridae
AVVQLTEDSK	8933.95	Lachnospiraceae	Family	Bacteria		Firmicutes	Clostridia	Clostridiales	Lachnospiraceae
AVVSNGIIK	42546.5	Mus musculus	Species	Eukaryota	Metazoa	Chordata	Mammalia	Rodentia	Muridae	Mus	Mus musculus
AVVVNAAQLASYSQSK	741.169	Chordata	Phylum	Eukaryota	Metazoa	Chordata
AVVVTDGER	10167.8	Metazoa	Kingdom	Eukaryota	Metazoa
AVWADVSAGK	8394.91	Lachnospiraceae bacterium MD335	Species	Bacteria		Firmicutes	Clostridia	Clostridiales	Lachnospiraceae		Lachnospiraceae bacterium MD335
AVYALNNLK	3049.17	Firmicutes	Phylum	Bacteria		Firmicutes
AVYETAQEYTGK	12250.7	Lachnospiraceae bacterium MD335	Species	Bacteria		Firmicutes	Clostridia	Clostridiales	Lachnospiraceae		Lachnospiraceae bacterium MD335
AVYQITK	4931.59	Lachnospiraceae bacterium A4	Species	Bacteria		Firmicutes	Clostridia	Clostridiales	Lachnospiraceae		Lachnospiraceae bacterium A4
AVYTVVNDPDQQFVVVTDPTTNDGILK	311.218	Mus musculus	Species	Eukaryota	Metazoa	Chordata	Mammalia	Rodentia	Muridae	Mus	Mus musculus
AVYVQQLR	39301.3	Prevotella melaninogenica	Species	Bacteria		Bacteroidetes	Bacteroidia	Bacteroidales	Prevotellaceae	Prevotella	Prevotella melaninogenica
AWAGYSIEEK	3834.54	Lachnospiraceae bacterium A4	Species	Bacteria		Firmicutes	Clostridia	Clostridiales	Lachnospiraceae		Lachnospiraceae bacterium A4
AWALDIAELR	883.08	Rodentia	Order	Eukaryota	Metazoa	Chordata	Mammalia	Rodentia
AWDADQTAANNR	186918	Muridae	Family	Eukaryota	Metazoa	Chordata	Mammalia	Rodentia	Muridae
AWDGFEIDKDFR	1807.31	Lachnospiraceae bacterium A4	Species	Bacteria		Firmicutes	Clostridia	Clostridiales	Lachnospiraceae		Lachnospiraceae bacterium A4
AWEGGGEYNVVR	15356.4	Bacteria	Superkingdom	Bacteria
AWLPLSDGISPTQGADYK	9143.63	Dorea sp. 5-2	Species	Bacteria		Firmicutes	Clostridia	Clostridiales	Lachnospiraceae	Dorea	Dorea sp. 5-2
AWMPLSDGISPTQGADYK	2300.27	Desulfovibrio alaskensis	Species	Bacteria		Proteobacteria	Deltaproteobacteria	Desulfovibrionales	Desulfovibrionaceae	Desulfovibrio	Desulfovibrio alaskensis
AWPTNSFNAMK	5894.02	Mucispirillum schaedleri	Species	Bacteria		Deferribacteres	Deferribacteres	Deferribacterales	Deferribacteraceae	Mucispirillum	Mucispirillum schaedleri
AYAEFYR	29986.7	Metazoa	Kingdom	Eukaryota	Metazoa
AYAEGMNR	22199.6	Eukaryota	Superkingdom	Eukaryota
AYAIATSGTMK	7628.06	Alistipes	Genus	Bacteria		Bacteroidetes	Bacteroidia	Bacteroidales	Rikenellaceae	Alistipes
AYAISGPTVQDGLPPFNWNR	1615.02	Mus musculus	Species	Eukaryota	Metazoa	Chordata	Mammalia	Rodentia	Muridae	Mus	Mus musculus
AYALAFAER	2703.95	Eukaryota	Superkingdom	Eukaryota
AYANHTYLVK	754.151	Bacteria	Superkingdom	Bacteria
AYAQAQEQVEQAYR	1410.18	Lachnospiraceae bacterium A2	Species	Bacteria		Firmicutes	Clostridia	Clostridiales	Lachnospiraceae		Lachnospiraceae bacterium A2
AYAQQLTEWAR	2038.77	Mammalia	Class	Eukaryota	Metazoa	Chordata	Mammalia
AYASGDVK	18031.4	Mus musculus	Species	Eukaryota	Metazoa	Chordata	Mammalia	Rodentia	Muridae	Mus	Mus musculus
AYASVQDPVEITPYEYR	571.702	Lachnospiraceae bacterium A4	Species	Bacteria		Firmicutes	Clostridia	Clostridiales	Lachnospiraceae		Lachnospiraceae bacterium A4
AYAVILTTGEAAQPSADVLK	317.496	Mus musculus	Species	Eukaryota	Metazoa	Chordata	Mammalia	Rodentia	Muridae	Mus	Mus musculus
AYDALPAVVEK	34196.7	Clostridium	Genus	Bacteria		Firmicutes	Clostridia	Clostridiales	Clostridiaceae	Clostridium
AYDDAFK	3566.28	Pseudomonas	Genus	Bacteria		Proteobacteria	Gammaproteobacteria	Pseudomonadales	Pseudomonadaceae	Pseudomonas
AYDDFELMEAGIR	1725.73	Clostridium	Genus	Bacteria		Firmicutes	Clostridia	Clostridiales	Clostridiaceae	Clostridium
AYDELPAVVEK	23833.1	Clostridiales	Order	Bacteria		Firmicutes	Clostridia	Clostridiales
AYDHELIDQSAEK	4305.49	Butyricicoccus pullicaecorum	Species	Bacteria		Firmicutes	Clostridia	Clostridiales	Clostridiaceae	Butyricicoccus	Butyricicoccus pullicaecorum
AYDHQLVDASAR	11816.9	Lachnospiraceae bacterium M18-1	Species	Bacteria		Firmicutes	Clostridia	Clostridiales	Lachnospiraceae		Lachnospiraceae bacterium M18-1
AYDHQLVDQSAAK	9211.94	Clostridiales	Order	Bacteria		Firmicutes	Clostridia	Clostridiales
AYDHQVIDQSAEK	1079.47	Firmicutes	Phylum	Bacteria		Firmicutes
AYDQAEVDGLNAK	2111.03	Prevotella	Genus	Bacteria		Bacteroidetes	Bacteroidia	Bacteroidales	Prevotellaceae	Prevotella
AYDYLIQNTSFANR	1080.37	Muridae	Family	Eukaryota	Metazoa	Chordata	Mammalia	Rodentia	Muridae
AYEAMTEGK	4730.72	Lachnospiraceae bacterium A4	Species	Bacteria		Firmicutes	Clostridia	Clostridiales	Lachnospiraceae		Lachnospiraceae bacterium A4
AYEAQTEPVLQYYQK	852.036	Rodentia	Order	Eukaryota	Metazoa	Chordata	Mammalia	Rodentia
AYEVLETYK	2041.07	Bacteria	Superkingdom	Bacteria
AYGELQSSAEAAAR	5561.06	Lachnospiraceae bacterium A2	Species	Bacteria		Firmicutes	Clostridia	Clostridiales	Lachnospiraceae		Lachnospiraceae bacterium A2
AYGENIGYSEK	63708	Chordata	Phylum	Eukaryota	Metazoa	Chordata
AYGSAYVAMNSK	6382.5	Firmicutes	Phylum	Bacteria		Firmicutes
AYIADQFR	44616.7	Bacteria	Superkingdom	Bacteria
AYIAQGEVLPVASR	3804.44	Firmicutes	Phylum	Bacteria		Firmicutes
AYIAQGEVLPVATK	97222.6	Clostridiales	Order	Bacteria		Firmicutes	Clostridia	Clostridiales
AYIAQGEVLPVATR	9045.87	Firmicutes	Phylum	Bacteria		Firmicutes
AYIDNLNR	88040	Bacteroidales	Order	Bacteria		Bacteroidetes	Bacteroidia	Bacteroidales
AYIIAPNGLK	10300.6	Daphnia magna	Species	Eukaryota	Metazoa	Arthropoda	Branchiopoda	Diplostraca	Daphniidae	Daphnia	Daphnia magna
AYIIAPQGLTDGMK	16414.1	Lachnoclostridium	Genus	Bacteria		Firmicutes	Clostridia	Clostridiales	Lachnospiraceae	Lachnoclostridium
AYILAPAGLTDGMK	21486.2	Clostridiales	Order	Bacteria		Firmicutes	Clostridia	Clostridiales
AYILAPDGLK	24210	Sandaracinus amylolyticus	Species	Bacteria		Proteobacteria	Deltaproteobacteria	Myxococcales	Sandaracinaceae	Sandaracinus	Sandaracinus amylolyticus
AYILAPEGLK	64915	Bacteria	Superkingdom	Bacteria
AYILAPEGLTDGMK	93586.1	Firmicutes	Phylum	Bacteria		Firmicutes
AYILDPVK	3096.99	Oscillibacter sp. 1-3	Species	Bacteria		Firmicutes	Clostridia	Clostridiales	Oscillospiraceae	Oscillibacter	Oscillibacter sp. 1-3
AYIYAIPYEYYEK	3531.62	Clostridium	Genus	Bacteria		Firmicutes	Clostridia	Clostridiales	Clostridiaceae	Clostridium
AYLDANPIVR	14507.4	Ruminococcus albus	Species	Bacteria		Firmicutes	Clostridia	Clostridiales	Ruminococcaceae	Ruminococcus	Ruminococcus albus
AYLEQNPIVR	12177.2	Ruminococcus albus	Species	Bacteria		Firmicutes	Clostridia	Clostridiales	Ruminococcaceae	Ruminococcus	Ruminococcus albus
AYLLDFAR	2283.27	Tieghemostelium lacteum	Species	Eukaryota		Evosea	Eumycetozoa	Dictyosteliales	Raperosteliaceae	Tieghemostelium	Tieghemostelium lacteum
AYLLFTNLDR	4189.18	Alistipes	Genus	Bacteria		Bacteroidetes	Bacteroidia	Bacteroidales	Rikenellaceae	Alistipes
AYLLQNR	17923.3	Bacteria	Superkingdom	Bacteria
AYLVNTGWNGTGK	25513.1	Bacteria	Superkingdom	Bacteria
AYLVSNEPMEGAFNYVQTR	32219.2	Mus musculus	Species	Eukaryota	Metazoa	Chordata	Mammalia	Rodentia	Muridae	Mus	Mus musculus
AYLYGLPYEYYEK	16551.5	Bacteria	Superkingdom	Bacteria
AYMYAIPYEYYEK	1007.8	Clostridiales	Order	Bacteria		Firmicutes	Clostridia	Clostridiales
AYNEMNEFEK	3106.18	Firmicutes	Phylum	Bacteria		Firmicutes
AYQEAQIYGEAVK	2774.5	Roseburia hominis	Species	Bacteria		Firmicutes	Clostridia	Clostridiales	Lachnospiraceae	Roseburia	Roseburia hominis
AYQEASIYGEAVK	1031.08	Roseburia intestinalis	Species	Bacteria		Firmicutes	Clostridia	Clostridiales	Lachnospiraceae	Roseburia	Roseburia intestinalis
AYQMIQR	34601.4	Lachnospiraceae bacterium A4	Species	Bacteria		Firmicutes	Clostridia	Clostridiales	Lachnospiraceae		Lachnospiraceae bacterium A4
AYQNFPTAVLPAPVADAVK	2148.15	Mucispirillum schaedleri	Species	Bacteria		Deferribacteres	Deferribacteres	Deferribacterales	Deferribacteraceae	Mucispirillum	Mucispirillum schaedleri
AYQNYVK	11052.3	Metazoa	Kingdom	Eukaryota	Metazoa
AYQQQIIK	4971.78	Lachnospiraceae bacterium MD335	Species	Bacteria		Firmicutes	Clostridia	Clostridiales	Lachnospiraceae		Lachnospiraceae bacterium MD335
AYTANEAVALVK	2968.62	Lactobacillus	Genus	Bacteria		Firmicutes	Bacilli	Lactobacillales	Lactobacillaceae	Lactobacillus
AYTISLFDK	5984.99	Lachnospiraceae bacterium A4	Species	Bacteria		Firmicutes	Clostridia	Clostridiales	Lachnospiraceae		Lachnospiraceae bacterium A4
AYTVSLLDGLK	4362.31	Bacteria	Superkingdom	Bacteria
AYVAEGEVLPVATR	5252.47	Clostridiales	Order	Bacteria		Firmicutes	Clostridia	Clostridiales
AYVAQGEVLPVATR	5374.65	Bacteria	Superkingdom	Bacteria
AYVEANQMLGDLIK	744.5	Mammalia	Class	Eukaryota	Metazoa	Chordata	Mammalia
AYVFESLRPTPELSFALR	949.068	Lachnospiraceae bacterium A4	Species	Bacteria		Firmicutes	Clostridia	Clostridiales	Lachnospiraceae		Lachnospiraceae bacterium A4
AYVFQEK	3872.16	Actinopteri	Class	Eukaryota	Metazoa	Chordata	Actinopteri
AYVSVDGVPQGILDR	4091.04	Mammalia	Class	Eukaryota	Metazoa	Chordata	Mammalia
AYVVLNSNDEK	29049.5	Lachnospiraceae bacterium A4	Species	Bacteria		Firmicutes	Clostridia	Clostridiales	Lachnospiraceae		Lachnospiraceae bacterium A4
AYYEEMDPTTAEALYK	1076.62	Lachnospiraceae bacterium A4	Species	Bacteria		Firmicutes	Clostridia	Clostridiales	Lachnospiraceae		Lachnospiraceae bacterium A4
AYYPINEIGAGK	12318.6	Clostridiales	Order	Bacteria		Firmicutes	Clostridia	Clostridiales
AYYPISEIGAGK	369813	Clostridiales	Order	Bacteria		Firmicutes	Clostridia	Clostridiales
AYYPISEIGK	52992.3	Faecalicatena contorta	Species	Bacteria		Firmicutes	Clostridia	Clostridiales	Lachnospiraceae	Faecalicatena	Faecalicatena contorta
AYYTPEEMVGKK	1477.8	Clostridiales	Order	Bacteria		Firmicutes	Clostridia	Clostridiales
AYYVINDNK	5794.92	Eubacterium plexicaudatum	Species	Bacteria		Firmicutes	Clostridia	Clostridiales	Eubacteriaceae	Eubacterium	Eubacterium plexicaudatum
DAAAAAIYGAR	17939.1	Bacteroidetes	Phylum	Bacteria		Bacteroidetes
DAAAILGITEYLER	1478.44	Anaerotruncus sp. G3(2012)	Species	Bacteria		Firmicutes	Clostridia	Clostridiales	Ruminococcaceae	Anaerotruncus	Anaerotruncus sp. G3(2012)
DAAASSIYGSR	20598.5	Bacteria	Superkingdom	Bacteria
DAAATAIYGSR	23591.5	Bacteroidetes	Phylum	Bacteria		Bacteroidetes
DAADQNFDYMFK	962.268	Metazoa	Kingdom	Eukaryota	Metazoa
DAAEIIAR	7221.2	Bacteria	Superkingdom	Bacteria
DAAFEFVK	3067.5	Halanaerobium hydrogeniformans	Species	Bacteria		Firmicutes	Clostridia	Halanaerobiales	Halanaerobiaceae	Halanaerobium	Halanaerobium hydrogeniformans
DAAGAGVTPEYSTDEAGQK	4792.53	Lachnospiraceae bacterium MD335	Species	Bacteria		Firmicutes	Clostridia	Clostridiales	Lachnospiraceae		Lachnospiraceae bacterium MD335
DAAGTGIQLVGSDK	2630.23	Lachnospiraceae bacterium MD308	Species	Bacteria		Firmicutes	Clostridia	Clostridiales	Lachnospiraceae		Lachnospiraceae bacterium MD308
DAALATALGDKK	1249.49	Chordata	Phylum	Eukaryota	Metazoa	Chordata
DAAPALTQFYVYSVSSEK	1662.73	Lachnospiraceae bacterium 10-1	Species	Bacteria		Firmicutes	Clostridia	Clostridiales	Lachnospiraceae		Lachnospiraceae bacterium 10-1
DAAQIISR	482533	Bacteria	Superkingdom	Bacteria
DAAQVAAVR	8018.37	Firmicutes	Phylum	Bacteria		Firmicutes
DAAQVISR	63876.4	Clostridiales	Order	Bacteria		Firmicutes	Clostridia	Clostridiales
DAASASIYGAR	9375.64	Bacteria	Superkingdom	Bacteria
DAASNALYGAR	47300.7	Bacteria	Superkingdom	Bacteria
DAASSAVYGAR	8571.72	Bacteroidales	Order	Bacteria		Bacteroidetes	Bacteroidia	Bacteroidales
DAASSSIYGAK	6246.49	Bacteroidetes	Phylum	Bacteria		Bacteroidetes
DAASTALYGSR	8761.31	Bacteroidetes	Phylum	Bacteria		Bacteroidetes
DADATYSAFLPTSGSSSVYTER	1115.79	Lachnospiraceae bacterium A4	Species	Bacteria		Firmicutes	Clostridia	Clostridiales	Lachnospiraceae		Lachnospiraceae bacterium A4
DADEFRK	17878.8	Ruminococcus	Genus	Bacteria		Firmicutes	Clostridia	Clostridiales	Ruminococcaceae	Ruminococcus
DADGNALVTEEEK	1912.84	Lachnospiraceae bacterium MD335	Species	Bacteria		Firmicutes	Clostridia	Clostridiales	Lachnospiraceae		Lachnospiraceae bacterium MD335
DADGNWYGIYK	2116	Olsenella	Genus	Bacteria		Actinobacteria	Coriobacteriia	Coriobacteriales	Atopobiaceae	Olsenella
DADIPTVLINR	79331.9	Lachnospiraceae bacterium MD335	Species	Bacteria		Firmicutes	Clostridia	Clostridiales	Lachnospiraceae		Lachnospiraceae bacterium MD335
DADIPTVLINREPTAEQMSAYEK	8932.89	Lachnospiraceae bacterium MD335	Species	Bacteria		Firmicutes	Clostridia	Clostridiales	Lachnospiraceae		Lachnospiraceae bacterium MD335
DADLVVISAGAPQKPGETR	2328.41	Lactobacillus	Genus	Bacteria		Firmicutes	Bacilli	Lactobacillales	Lactobacillaceae	Lactobacillus
DADPLNKDGK	4811.72	Lachnospiraceae bacterium A4	Species	Bacteria		Firmicutes	Clostridia	Clostridiales	Lachnospiraceae		Lachnospiraceae bacterium A4
DADSFDEDSINEIFR	1329.68	Lachnospiraceae bacterium MD335	Species	Bacteria		Firmicutes	Clostridia	Clostridiales	Lachnospiraceae		Lachnospiraceae bacterium MD335
DADSITLFDVQQK	1211.72	Metazoa	Kingdom	Eukaryota	Metazoa
DADVELLKEYQEAAEGNIR	1347.75	Lachnospiraceae bacterium 28-4	Species	Bacteria		Firmicutes	Clostridia	Clostridiales	Lachnospiraceae		Lachnospiraceae bacterium 28-4
DADWEFVVK	1994.4	Bacteria	Superkingdom	Bacteria
DADYTVSYEK	3826.25	Lachnospiraceae bacterium A2	Species	Bacteria		Firmicutes	Clostridia	Clostridiales	Lachnospiraceae		Lachnospiraceae bacterium A2
DAEATYLAR	36567.2	Mus musculus	Species	Eukaryota	Metazoa	Chordata	Mammalia	Rodentia	Muridae	Mus	Mus musculus
DAEDAMDAMDGAVLDGR	731.889	Chordata	Phylum	Eukaryota	Metazoa	Chordata
DAEDWFFSK	1502.25	Mammalia	Class	Eukaryota	Metazoa	Chordata	Mammalia
DAEEWFFTK	5240.66	Mammalia	Class	Eukaryota	Metazoa	Chordata	Mammalia
DAEEWFNQK	2559.96	Mus musculus	Species	Eukaryota	Metazoa	Chordata	Mammalia	Rodentia	Muridae	Mus	Mus musculus
DAEEWFQTK	1492.07	Mus musculus	Species	Eukaryota	Metazoa	Chordata	Mammalia	Rodentia	Muridae	Mus	Mus musculus
DAELANSVPEGDR	2763.81	Mus musculus	Species	Eukaryota	Metazoa	Chordata	Mammalia	Rodentia	Muridae	Mus	Mus musculus
DAELANSVPEGDRETLWAELK	4875.1	Mus musculus	Species	Eukaryota	Metazoa	Chordata	Mammalia	Rodentia	Muridae	Mus	Mus musculus
DAELEQLGR	18945.8	Eubacterium plexicaudatum	Species	Bacteria		Firmicutes	Clostridia	Clostridiales	Eubacteriaceae	Eubacterium	Eubacterium plexicaudatum
DAEMTEDQVGELK	2479.86	Lachnospiraceae bacterium MD335	Species	Bacteria		Firmicutes	Clostridia	Clostridiales	Lachnospiraceae		Lachnospiraceae bacterium MD335
DAEMTEDQVSELK	1544.36	Roseburia	Genus	Bacteria		Firmicutes	Clostridia	Clostridiales	Lachnospiraceae	Roseburia
DAEQNPPTITLTGK	4230.78	Lachnospiraceae bacterium A2	Species	Bacteria		Firmicutes	Clostridia	Clostridiales	Lachnospiraceae		Lachnospiraceae bacterium A2
DAETTLTELRR	1927.8	Chordata	Phylum	Eukaryota	Metazoa	Chordata
DAFAADPIITEDIVAR	3745.81	Dorea sp. 5-2	Species	Bacteria		Firmicutes	Clostridia	Clostridiales	Lachnospiraceae	Dorea	Dorea sp. 5-2
DAFDSLYK	2040.47	Lachnospiraceae bacterium A4	Species	Bacteria		Firmicutes	Clostridia	Clostridiales	Lachnospiraceae		Lachnospiraceae bacterium A4
DAFNAGFR	18195.8	Firmicutes	Phylum	Bacteria		Firmicutes
DAFSTAIYGSR	5050.44	Alistipes	Genus	Bacteria		Bacteroidetes	Bacteroidia	Bacteroidales	Rikenellaceae	Alistipes
DAFVYAIK	3240.83	Chordata	Phylum	Eukaryota	Metazoa	Chordata
DAGADVVGDDDLVAR	9910.16	Lactobacillus	Genus	Bacteria		Firmicutes	Bacilli	Lactobacillales	Lactobacillaceae	Lactobacillus
DAGADYVIIGHSER	2821.52	Desulfobacter postgatei	Species	Bacteria		Proteobacteria	Deltaproteobacteria	Desulfobacterales	Desulfobacteraceae	Desulfobacter	Desulfobacter postgatei
DAGATALYGAR	11859.5	Bacteroidales	Order	Bacteria		Bacteroidetes	Bacteroidia	Bacteroidales
DAGILLGTTLNPETDYK	1266.53	Lachnospiraceae bacterium A2	Species	Bacteria		Firmicutes	Clostridia	Clostridiales	Lachnospiraceae		Lachnospiraceae bacterium A2
DAGIPTFLIDR	16450.9	Bacteria	Superkingdom	Bacteria
DAGIPVISYDR	33417.2	Bacteria	Superkingdom	Bacteria
DAGIPVLIVDR	130572	Lachnospiraceae bacterium A4	Species	Bacteria		Firmicutes	Clostridia	Clostridiales	Lachnospiraceae		Lachnospiraceae bacterium A4
DAGIQMSVIK	2842.35	Lactobacillus reuteri	Species	Bacteria		Firmicutes	Bacilli	Lactobacillales	Lactobacillaceae	Lactobacillus	Lactobacillus reuteri
DAGITASELGK	33532.5	Firmicutes	Phylum	Bacteria		Firmicutes
DAGLDVYDQVK	168284	Firmicutes	Phylum	Bacteria		Firmicutes
DAGLDVYDQVKK	27849.2	Firmicutes	Phylum	Bacteria		Firmicutes
DAGLDVYEQVK	124066	Clostridiales	Order	Bacteria		Firmicutes	Clostridia	Clostridiales
DAGLDVYEQVKK	23277.6	Clostridiales	Order	Bacteria		Firmicutes	Clostridia	Clostridiales
DAGLDVYNQVK	61996.5	Firmicutes	Phylum	Bacteria		Firmicutes
DAGLNVYDQIK	35333.7	Clostridiales	Order	Bacteria		Firmicutes	Clostridia	Clostridiales
DAGLNVYDQVKK	2271.13	Clostridiales	Order	Bacteria		Firmicutes	Clostridia	Clostridiales
DAGLTASEIGQVLLVGGSTR	5864.62	Lachnospiraceae bacterium MD335	Species	Bacteria		Firmicutes	Clostridia	Clostridiales	Lachnospiraceae		Lachnospiraceae bacterium MD335
DAGLTSSEIGQVLLVGGSTR	10632.8	Lachnospiraceae bacterium A4	Species	Bacteria		Firmicutes	Clostridia	Clostridiales	Lachnospiraceae		Lachnospiraceae bacterium A4
DAGMQLQGYR	11860.3	Mammalia	Class	Eukaryota	Metazoa	Chordata	Mammalia
DAGQISGLNVLR	6834.89	Eukaryota	Superkingdom	Eukaryota
DAGVDMSTK	10718.9	Roseburia	Genus	Bacteria		Firmicutes	Clostridia	Clostridiales	Lachnospiraceae	Roseburia
DAGVEGVVPAK	4969.59	Lactobacillus	Genus	Bacteria		Firmicutes	Bacilli	Lactobacillales	Lactobacillaceae	Lactobacillus
DAGVEYVIIGHSER	11827.9	Lachnospiraceae	Family	Bacteria		Firmicutes	Clostridia	Clostridiales	Lachnospiraceae
DAGVSTYMYEFR	1252.27	Mus musculus	Species	Eukaryota	Metazoa	Chordata	Mammalia	Rodentia	Muridae	Mus	Mus musculus
DAGYFDPAVK	55983.9	Lachnospiraceae bacterium A4	Species	Bacteria		Firmicutes	Clostridia	Clostridiales	Lachnospiraceae		Lachnospiraceae bacterium A4
DAIAAGSMIGTIK	31131.4	Lachnospiraceae bacterium A4	Species	Bacteria		Firmicutes	Clostridia	Clostridiales	Lachnospiraceae		Lachnospiraceae bacterium A4
DAIAQAEMDLKR	1366.2	Mammalia	Class	Eukaryota	Metazoa	Chordata	Mammalia
DAINNVSSVR	35657.9	Firmicutes bacterium ASF500	Species	Bacteria		Firmicutes					Firmicutes bacterium ASF500
DAINQELNALTDELDR	1274.91	Lachnospiraceae bacterium A2	Species	Bacteria		Firmicutes	Clostridia	Clostridiales	Lachnospiraceae		Lachnospiraceae bacterium A2
DAINYVSSVR	59678.6	Oscillibacter sp. 1-3	Species	Bacteria		Firmicutes	Clostridia	Clostridiales	Oscillospiraceae	Oscillibacter	Oscillibacter sp. 1-3
DAIQSVPGYEQK	18058	Lactobacillus	Genus	Bacteria		Firmicutes	Bacilli	Lactobacillales	Lactobacillaceae	Lactobacillus
DAKPDTDFMPLQVEYK	3173.43	Alistipes	Genus	Bacteria		Bacteroidetes	Bacteroidia	Bacteroidales	Rikenellaceae	Alistipes
DALDAVVSRPPFVSFDDSK	3654.91	Lactobacillus	Genus	Bacteria		Firmicutes	Bacilli	Lactobacillales	Lactobacillaceae	Lactobacillus
DALGQEIK	37140.8	Porphyromonas catoniae	Species	Bacteria		Bacteroidetes	Bacteroidia	Bacteroidales	Porphyromonadaceae	Porphyromonas	Porphyromonas catoniae
DALIAAIPDTVK	67898.5	Lachnospiraceae bacterium A2	Species	Bacteria		Firmicutes	Clostridia	Clostridiales	Lachnospiraceae		Lachnospiraceae bacterium A2
DALLENVTLDADGK	5470.54	Clostridiales	Order	Bacteria		Firmicutes	Clostridia	Clostridiales
DALLENVTVDAEGK	31103.2	Bacteria	Superkingdom	Bacteria
DALLENVTVDANGK	3102	Bacteria	Superkingdom	Bacteria
DALLENVTVDKDGK	2033.54	Bacteria	Superkingdom	Bacteria
DALLGPEGK	24144.3	Clostridiales	Order	Bacteria		Firmicutes	Clostridia	Clostridiales
DALLWAVENK	14119.7	Hungateiclostridiaceae bacterium KB18	Species	Bacteria		Firmicutes	Clostridia	Clostridiales	Hungateiclostridiaceae		Hungateiclostridiaceae bacterium KB18
DALNIETAVK	12058.8	Rodentia	Order	Eukaryota	Metazoa	Chordata	Mammalia	Rodentia
DALTDKPAR	9982.56	Bacteroidales	Order	Bacteria		Bacteroidetes	Bacteroidia	Bacteroidales
DALTIEQNAFK	3584.35	Lachnospiraceae bacterium A4	Species	Bacteria		Firmicutes	Clostridia	Clostridiales	Lachnospiraceae		Lachnospiraceae bacterium A4
DALVEQVAVIGENLK	2440.99	Roseburia	Genus	Bacteria		Firmicutes	Clostridia	Clostridiales	Lachnospiraceae	Roseburia
DALWDAFNDYHMIK	1375.64	Firmicutes	Phylum	Bacteria		Firmicutes
DAMDNFKK	2489.9	Firmicutes	Phylum	Bacteria		Firmicutes
DAMITAIDLR	24239.3	Lachnospiraceae	Family	Bacteria		Firmicutes	Clostridia	Clostridiales	Lachnospiraceae
DAMITVEDGIR	4147.16	Mus musculus	Species	Eukaryota	Metazoa	Chordata	Mammalia	Rodentia	Muridae	Mus	Mus musculus
DAMLENQTPELFQDVNKPK	1169.4	Mammalia	Class	Eukaryota	Metazoa	Chordata	Mammalia
DAMLTYVQK	2228.93	Firmicutes	Phylum	Bacteria		Firmicutes
DAMQYASESK	3074.37	Metazoa	Kingdom	Eukaryota	Metazoa
DAMTGLPIGGAK	57481.9	Firmicutes	Phylum	Bacteria		Firmicutes
DANFINSLSGK	3609.43	Bacteria	Superkingdom	Bacteria
DANGHEVLSDDSVR	1838.92	Lachnospiraceae bacterium MD335	Species	Bacteria		Firmicutes	Clostridia	Clostridiales	Lachnospiraceae		Lachnospiraceae bacterium MD335
DANMFDVVR	18953.6	Bacteria	Superkingdom	Bacteria
DAQDESFAK	29008.3	Clostridiales	Order	Bacteria		Firmicutes	Clostridia	Clostridiales
DAQDGISNTFTIIPGALGK	16810.3	Clostridiales	Order	Bacteria		Firmicutes	Clostridia	Clostridiales
DAQDGISNTFTIIPNALGK	31014.8	Lachnospiraceae	Family	Bacteria		Firmicutes	Clostridia	Clostridiales	Lachnospiraceae
DAQGNPIVGTK	23698	Lachnospiraceae bacterium A4	Species	Bacteria		Firmicutes	Clostridia	Clostridiales	Lachnospiraceae		Lachnospiraceae bacterium A4
DAQILYNAGENK	4126.12	Mammalia	Class	Eukaryota	Metazoa	Chordata	Mammalia
DAQLVAENIALQLENR	4278.35	Firmicutes	Phylum	Bacteria		Firmicutes
DAQLVAENIAQQLENR	73540.6	Bacteria	Superkingdom	Bacteria
DAQLVAESIAQQLENR	7791.13	Clostridiales	Order	Bacteria		Firmicutes	Clostridia	Clostridiales
DAQSVVLVDHR	9064.56	Clostridiales	Order	Bacteria		Firmicutes	Clostridia	Clostridiales
DAQSVVLVDYR	23038.7	Firmicutes	Phylum	Bacteria		Firmicutes
DAQWVGFITR	5825.01	Mus musculus	Species	Eukaryota	Metazoa	Chordata	Mammalia	Rodentia	Muridae	Mus	Mus musculus
DAQYVDEDGNPNINTK	1109.34	Dorea sp. 5-2	Species	Bacteria		Firmicutes	Clostridia	Clostridiales	Lachnospiraceae	Dorea	Dorea sp. 5-2
DASAAVYGSR	9415.41	Bacteroidetes	Phylum	Bacteria		Bacteroidetes
DASAGAIYGTR	5893.16	Bacteroidia	Class	Bacteria		Bacteroidetes	Bacteroidia
DASASVLYGSR	3087.52	Bacteroidetes	Phylum	Bacteria		Bacteroidetes
DASATAIYGSR	34862.7	Bacteria	Superkingdom	Bacteria
DASATAVFGVR	7059.41	Bacteria	Superkingdom	Bacteria
DASATAVYGVK	19526	Bacteroidetes	Phylum	Bacteria		Bacteroidetes
DASATSIYGSR	14640	Bacteroidetes	Phylum	Bacteria		Bacteroidetes
DASLGAQLLENR	4723.61	Firmicutes	Phylum	Bacteria		Firmicutes
DASLTAIYGAK	10536.5	Bacteroidales	Order	Bacteria		Bacteroidetes	Bacteroidia	Bacteroidales
DASPGSPLEK	12465.9	Mammalia	Class	Eukaryota	Metazoa	Chordata	Mammalia
DASSTAIYGAR	13398.9	Bacteria	Superkingdom	Bacteria
DASSTAIYGSR	67182.8	Bacteria	Superkingdom	Bacteria
DASTIVAINK	23297.8	Firmicutes	Phylum	Bacteria		Firmicutes
DASVFAYAYNK	4719.12	Firmicutes	Phylum	Bacteria		Firmicutes
DASVVGFFR	2907.39	Metazoa	Kingdom	Eukaryota	Metazoa
DATATAMYGTR	4561.67	Bacteroidetes	Phylum	Bacteria		Bacteroidetes
DATDNFIQYAK	10712.1	Lachnospiraceae bacterium A4	Species	Bacteria		Firmicutes	Clostridia	Clostridiales	Lachnospiraceae		Lachnospiraceae bacterium A4
DATFSIYGLVR	1073.85	Lachnospiraceae bacterium 28-4	Species	Bacteria		Firmicutes	Clostridia	Clostridiales	Lachnospiraceae		Lachnospiraceae bacterium 28-4
DATGAAATYAIDSIADAVSK	25577.3	Lachnospiraceae bacterium A4	Species	Bacteria		Firmicutes	Clostridia	Clostridiales	Lachnospiraceae		Lachnospiraceae bacterium A4
DATGEQGIVSTSK	7482.59	Anaerotruncus sp. G3(2012)	Species	Bacteria		Firmicutes	Clostridia	Clostridiales	Ruminococcaceae	Anaerotruncus	Anaerotruncus sp. G3(2012)
DATKDVSVSVVNIFGADTK	5663.45	Mus musculus	Species	Eukaryota	Metazoa	Chordata	Mammalia	Rodentia	Muridae	Mus	Mus musculus
DATLDQLGR	47039.8	Clostridiales	Order	Bacteria		Firmicutes	Clostridia	Clostridiales
DATMDMLGR	7478.44	Clostridiales	Order	Bacteria		Firmicutes	Clostridia	Clostridiales
DATNVGDEGGFAPNILENK	8250.54	Metazoa	Kingdom	Eukaryota	Metazoa
DATNVGDEGGFAPNILENKEALELLK	1527.86	Metazoa	Kingdom	Eukaryota	Metazoa
DATNVGDEGGFAPNILENNEALELLK	1059.64	Chordata	Phylum	Eukaryota	Metazoa	Chordata
DATPGGVVK	93657.5	Bacteria	Superkingdom	Bacteria
DATPGGVVKK	6528.62	Bacteria	Superkingdom	Bacteria
DATPMFVYGVNDK	2750.96	Bacteroides	Genus	Bacteria		Bacteroidetes	Bacteroidia	Bacteroidales	Bacteroidaceae	Bacteroides
DATSLNQAALYR	1795.86	Mus musculus	Species	Eukaryota	Metazoa	Chordata	Mammalia	Rodentia	Muridae	Mus	Mus musculus
DATVDQLGQANK	4253.39	Lactobacillus	Genus	Bacteria		Firmicutes	Bacilli	Lactobacillales	Lactobacillaceae	Lactobacillus
DATVQWSSNRPDYVK	1435.35	Lachnospiraceae bacterium MD335	Species	Bacteria		Firmicutes	Clostridia	Clostridiales	Lachnospiraceae		Lachnospiraceae bacterium MD335
DAVASGTVMSK	202463	Clostridiaceae	Family	Bacteria		Firmicutes	Clostridia	Clostridiales	Clostridiaceae
DAVDFVESHK	3266.62	Clostridiales	Order	Bacteria		Firmicutes	Clostridia	Clostridiales
DAVGDISYTLK	4708.03	Clostridiales	Order	Bacteria		Firmicutes	Clostridia	Clostridiales
DAVIIRPSDATK	3450.49	Lachnospiraceae bacterium MD335	Species	Bacteria		Firmicutes	Clostridia	Clostridiales	Lachnospiraceae		Lachnospiraceae bacterium MD335
DAVLNAWAEDVDLR	6070.87	Metazoa	Kingdom	Eukaryota	Metazoa
DAVSNSLYGSR	14669.1	Bacteria	Superkingdom	Bacteria
DAVSVSDQNNLAK	176900	Lachnospiraceae bacterium MD335	Species	Bacteria		Firmicutes	Clostridia	Clostridiales	Lachnospiraceae		Lachnospiraceae bacterium MD335
DAVTYTEHAK	315534	Eukaryota	Superkingdom	Eukaryota
DAVVGVMPEGDEK	8993.97	Lachnospiraceae bacterium MD335	Species	Bacteria		Firmicutes	Clostridia	Clostridiales	Lachnospiraceae		Lachnospiraceae bacterium MD335
DAYAAEGHSAASVK	3402.94	Lachnospiraceae bacterium MD335	Species	Bacteria		Firmicutes	Clostridia	Clostridiales	Lachnospiraceae		Lachnospiraceae bacterium MD335
DAYGEGWLVK	2842.53	Alistipes	Genus	Bacteria		Bacteroidetes	Bacteroidia	Bacteroidales	Rikenellaceae	Alistipes
DAYIYDTETK	2116.68	Lachnospiraceae bacterium A4	Species	Bacteria		Firmicutes	Clostridia	Clostridiales	Lachnospiraceae		Lachnospiraceae bacterium A4
DAYNATYDPNVLFK	2081.82	Lachnospiraceae bacterium A4	Species	Bacteria		Firmicutes	Clostridia	Clostridiales	Lachnospiraceae		Lachnospiraceae bacterium A4
DAYSGGAVNLYHVR	634.307	Mammalia	Class	Eukaryota	Metazoa	Chordata	Mammalia
DAYYITNGK	1839.01	Lachnospiraceae bacterium MD335	Species	Bacteria		Firmicutes	Clostridia	Clostridiales	Lachnospiraceae		Lachnospiraceae bacterium MD335
DDAQLSGLASALR	2839.67	Mammalia	Class	Eukaryota	Metazoa	Chordata	Mammalia
DDDVPLEWR	6300.7	Chordata	Phylum	Eukaryota	Metazoa	Chordata
DDDVPLMWR	3021.6	Chordata	Phylum	Eukaryota	Metazoa	Chordata
DDETMYVESK	3285.21	Metazoa	Kingdom	Eukaryota	Metazoa
DDEVQVVR	10087.3	Eukaryota	Superkingdom	Eukaryota
DDGAAILVAVSNMVQK	1027.09	Mus musculus	Species	Eukaryota	Metazoa	Chordata	Mammalia	Rodentia	Muridae	Mus	Mus musculus
DDGGGINVEAVR	9613.93	Lachnospiraceae bacterium A4	Species	Bacteria		Firmicutes	Clostridia	Clostridiales	Lachnospiraceae		Lachnospiraceae bacterium A4
DDGLFSGDPNWFPK	1719.67	Mammalia	Class	Eukaryota	Metazoa	Chordata	Mammalia
DDGSEVVIR	3204.26	Desulfovibrionaceae	Family	Bacteria		Proteobacteria	Deltaproteobacteria	Desulfovibrionales	Desulfovibrionaceae
DDGSWEVIEGYR	2746.16	Mammalia	Class	Eukaryota	Metazoa	Chordata	Mammalia
DDISEAIAKPGENKK	7742.66	Lachnospiraceae bacterium MD335	Species	Bacteria		Firmicutes	Clostridia	Clostridiales	Lachnospiraceae		Lachnospiraceae bacterium MD335
DDITFVSGAPR	3621.55	Mammalia	Class	Eukaryota	Metazoa	Chordata	Mammalia
DDIWSAAAYVR	5622.69	Mucispirillum schaedleri	Species	Bacteria		Deferribacteres	Deferribacteres	Deferribacterales	Deferribacteraceae	Mucispirillum	Mucispirillum schaedleri
DDKGVYTIVPR	3656.51	Lachnospiraceae bacterium A4	Species	Bacteria		Firmicutes	Clostridia	Clostridiales	Lachnospiraceae		Lachnospiraceae bacterium A4
DDKYEDMLK	10879	Alistipes	Genus	Bacteria		Bacteroidetes	Bacteroidia	Bacteroidales	Rikenellaceae	Alistipes
DDLLGINSGIIK	7517.62	Mucispirillum schaedleri	Species	Bacteria		Deferribacteres	Deferribacteres	Deferribacterales	Deferribacteraceae	Mucispirillum	Mucispirillum schaedleri
DDLYVSDAFHK	3994.9	Mammalia	Class	Eukaryota	Metazoa	Chordata	Mammalia
DDMAEAIEDAFR	4224.22	Bacteria	Superkingdom	Bacteria
DDMAEAVEDAFR	2929.07	Bacteria	Superkingdom	Bacteria
DDNMFQIGK	6893.37	Chordata	Phylum	Eukaryota	Metazoa	Chordata
DDNSGPSVLFSVQK	1856.79	Mus musculus	Species	Eukaryota	Metazoa	Chordata	Mammalia	Rodentia	Muridae	Mus	Mus musculus
DDNSVELTVAEGPYK	973.89	Metazoa	Kingdom	Eukaryota	Metazoa
DDNWISQETENGK	2993.07	Mucispirillum schaedleri	Species	Bacteria		Deferribacteres	Deferribacteres	Deferribacterales	Deferribacteraceae	Mucispirillum	Mucispirillum schaedleri
DDPVTNLNNAFEVAEK	763.542	Chordata	Phylum	Eukaryota	Metazoa	Chordata
DDSHSVVYTR	19992.8	Mus musculus	Species	Eukaryota	Metazoa	Chordata	Mammalia	Rodentia	Muridae	Mus	Mus musculus
DDTEKLSNLQADISK	1006.93	Lachnospiraceae	Family	Bacteria		Firmicutes	Clostridia	Clostridiales	Lachnospiraceae
DDTIYLTHK	139513	Rodentia	Order	Eukaryota	Metazoa	Chordata	Mammalia	Rodentia
DDTLHETEDVK	3317.54	Mus musculus	Species	Eukaryota	Metazoa	Chordata	Mammalia	Rodentia	Muridae	Mus	Mus musculus
DDTPMFVMGVNQDAYTK	776.477	Butyricicoccus pullicaecorum	Species	Bacteria		Firmicutes	Clostridia	Clostridiales	Clostridiaceae	Butyricicoccus	Butyricicoccus pullicaecorum
DDTVVGENAKK	1436.98	Clostridiales	Order	Bacteria		Firmicutes	Clostridia	Clostridiales
DDTYQSYSSPSPR	422076	Mus musculus	Species	Eukaryota	Metazoa	Chordata	Mammalia	Rodentia	Muridae	Mus	Mus musculus
DDVIDGNGGDDMLTVSMAR	1609.2	Bacteria	Superkingdom	Bacteria
DEAFFHK	5251.93	Eubacterium plexicaudatum	Species	Bacteria		Firmicutes	Clostridia	Clostridiales	Eubacteriaceae	Eubacterium	Eubacterium plexicaudatum
DEAGTFYVPSEYAK	2676.85	Lachnospiraceae bacterium MD335	Species	Bacteria		Firmicutes	Clostridia	Clostridiales	Lachnospiraceae		Lachnospiraceae bacterium MD335
DEALVQLLLGR	18571	Muridae	Family	Eukaryota	Metazoa	Chordata	Mammalia	Rodentia	Muridae
DEDITEYQSILAAAVK	424.02	Mus musculus	Species	Eukaryota	Metazoa	Chordata	Mammalia	Rodentia	Muridae	Mus	Mus musculus
DEDSEDNGIIMFSILK	4919.36	Mus musculus	Species	Eukaryota	Metazoa	Chordata	Mammalia	Rodentia	Muridae	Mus	Mus musculus
DEEDTVDKELAGQDAK	1167.11	Muridae	Family	Eukaryota	Metazoa	Chordata	Mammalia	Rodentia	Muridae
DEGNYLDDALMK	71769.4	Mus musculus	Species	Eukaryota	Metazoa	Chordata	Mammalia	Rodentia	Muridae	Mus	Mus musculus
DEINAAMK	45982.8	Bacteria	Superkingdom	Bacteria
DEIPYLR	6212.59	Chordata	Phylum	Eukaryota	Metazoa	Chordata
DEIVFLR	1903.95	Akkermansia glycaniphila	Species	Bacteria		Verrucomicrobia	Verrucomicrobiae	Verrucomicrobiales	Akkermansiaceae	Akkermansia	Akkermansia glycaniphila
DELGGLANAFR	4005.08	Eubacterium plexicaudatum	Species	Bacteria		Firmicutes	Clostridia	Clostridiales	Eubacteriaceae	Eubacterium	Eubacterium plexicaudatum
DELGSLANAFK	6324.37	Lachnospiraceae bacterium 28-4	Species	Bacteria		Firmicutes	Clostridia	Clostridiales	Lachnospiraceae		Lachnospiraceae bacterium 28-4
DELIAEAEK	5075.81	Clostridiales	Order	Bacteria		Firmicutes	Clostridia	Clostridiales
DELLQVLR	2826.47	Metazoa	Kingdom	Eukaryota	Metazoa
DELTLEGIK	7203.74	Eukaryota	Superkingdom	Eukaryota
DEMFTLSR	1999.82	Mus musculus	Species	Eukaryota	Metazoa	Chordata	Mammalia	Rodentia	Muridae	Mus	Mus musculus
DENGKPLAYPLEIYVK	11748	Mus musculus	Species	Eukaryota	Metazoa	Chordata	Mammalia	Rodentia	Muridae	Mus	Mus musculus
DENPFLGYR	14413.5	Clostridiales	Order	Bacteria		Firmicutes	Clostridia	Clostridiales
DEQGSAADSEDSPTIEAVR	264.473	Muridae	Family	Eukaryota	Metazoa	Chordata	Mammalia	Rodentia	Muridae
DEQVVVSHDANLK	1442.65	Rodentia	Order	Eukaryota	Metazoa	Chordata	Mammalia	Rodentia
DESTNVDMSLVQR	4665.39	Chordata	Phylum	Eukaryota	Metazoa	Chordata
DETEFYLGK	2947.52	Eukaryota	Superkingdom	Eukaryota
DETEFYLGKR	2254.45	Eukaryota	Superkingdom	Eukaryota
DETFAQTQPR	9042.98	Bacteria	Superkingdom	Bacteria
DETNYGIPQR	9582.25	Metazoa	Kingdom	Eukaryota	Metazoa
DFADYLVEDHEIR	1192.63	Lachnospiraceae	Family	Bacteria		Firmicutes	Clostridia	Clostridiales	Lachnospiraceae
DFAELDDKLAK	970.174	Lactobacillus johnsonii	Species	Bacteria		Firmicutes	Bacilli	Lactobacillales	Lactobacillaceae	Lactobacillus	Lactobacillus johnsonii
DFAYEAGSK	10930.5	Lachnospiraceae	Family	Bacteria		Firmicutes	Clostridia	Clostridiales	Lachnospiraceae
DFDAVVVR	11829.1	Firmicutes	Phylum	Bacteria		Firmicutes
DFDINPYSYSMNTSR	757.421	Bacteroides	Genus	Bacteria		Bacteroidetes	Bacteroidia	Bacteroidales	Bacteroidaceae	Bacteroides
DFDLFLDR	25593.9	Papilio xuthus	Species	Eukaryota	Metazoa	Arthropoda	Insecta	Lepidoptera	Papilionidae	Papilio	Papilio xuthus
DFDNPWGK	4362.67	Bacteroidales	Order	Bacteria		Bacteroidetes	Bacteroidia	Bacteroidales
DFDNTGIGILEISHR	1659.82	Bacteroidales	Order	Bacteria		Bacteroidetes	Bacteroidia	Bacteroidales
DFELYSMIER	3084.66	Lachnospiraceae bacterium A4	Species	Bacteria		Firmicutes	Clostridia	Clostridiales	Lachnospiraceae		Lachnospiraceae bacterium A4
DFENLVAAIHDK	11814.1	Chordata	Phylum	Eukaryota	Metazoa	Chordata
DFEPDWIIAMGGGSPIDAAK	458.708	Anaerostipes caccae	Species	Bacteria		Firmicutes	Clostridia	Clostridiales	Lachnospiraceae	Anaerostipes	Anaerostipes caccae
DFFGEQLK	4102.46	Lachnospiraceae	Family	Bacteria		Firmicutes	Clostridia	Clostridiales	Lachnospiraceae
DFFLANASR	3815.19	Chordata	Phylum	Eukaryota	Metazoa	Chordata
DFHAYADAQK	5033.57	Lachnospiraceae bacterium A4	Species	Bacteria		Firmicutes	Clostridia	Clostridiales	Lachnospiraceae		Lachnospiraceae bacterium A4
DFILDNLR	5924.48	Alloiococcus otitis	Species	Bacteria		Firmicutes	Bacilli	Lactobacillales	Carnobacteriaceae	Alloiococcus	Alloiococcus otitis
DFILDSGPTGSDADMLIGAGR	1046.72	Anaerotruncus sp. G3(2012)	Species	Bacteria		Firmicutes	Clostridia	Clostridiales	Ruminococcaceae	Anaerotruncus	Anaerotruncus sp. G3(2012)
DFILDYK	4681.1	Bacteria	Superkingdom	Bacteria
DFIMNEAR	7568.46	Clostridiales	Order	Bacteria		Firmicutes	Clostridia	Clostridiales
DFIMSEAR	8044.35	Anaerotruncus sp. G3(2012)	Species	Bacteria		Firmicutes	Clostridia	Clostridiales	Ruminococcaceae	Anaerotruncus	Anaerotruncus sp. G3(2012)
DFIVESIQDNAGSK	1937.05	Lachnospiraceae bacterium A4	Species	Bacteria		Firmicutes	Clostridia	Clostridiales	Lachnospiraceae		Lachnospiraceae bacterium A4
DFIYVSQDPK	5205.25	Metazoa	Kingdom	Eukaryota	Metazoa
DFKPAIK	9777.81	Bacteria	Superkingdom	Bacteria
DFLAGGVAAAISK	12760.9	Metazoa	Kingdom	Eukaryota	Metazoa
DFLAYTFGK	27103.3	Lachnospiraceae	Family	Bacteria		Firmicutes	Clostridia	Clostridiales	Lachnospiraceae
DFLIPIGK	1507.11	Eukaryota	Superkingdom	Eukaryota
DFLLDMSAAGGQAHFK	1923.74	Firmicutes	Phylum	Bacteria		Firmicutes
DFLLDMSSAGGQVHFK	1089.21	Clostridiales	Order	Bacteria		Firmicutes	Clostridia	Clostridiales
DFLLQQTMLR	3134.78	Chordata	Phylum	Eukaryota	Metazoa	Chordata
DFLLSEVR	13106.8	Bacteria	Superkingdom	Bacteria
DFLMGEVR	12541.6	Bacteria	Superkingdom	Bacteria
DFMIQGGDFTR	7236.06	Eukaryota	Superkingdom	Eukaryota
DFNAADYMDK	2154.36	Lachnospiraceae bacterium A4	Species	Bacteria		Firmicutes	Clostridia	Clostridiales	Lachnospiraceae		Lachnospiraceae bacterium A4
DFNAADYMDKK	4995.96	Lachnospiraceae bacterium A4	Species	Bacteria		Firmicutes	Clostridia	Clostridiales	Lachnospiraceae		Lachnospiraceae bacterium A4
DFPGFSIGK	3101.41	Bacteria	Superkingdom	Bacteria
DFPGFSTGK	8766.22	Firmicutes	Phylum	Bacteria		Firmicutes
DFPGVPYSGFDFNDGK	23930.1	Muridae	Family	Eukaryota	Metazoa	Chordata	Mammalia	Rodentia	Muridae
DFPIANGDR	6868.89	Rodentia	Order	Eukaryota	Metazoa	Chordata	Mammalia	Rodentia
DFPMFPK	1681.6	Hungateiclostridiaceae bacterium KB18	Species	Bacteria		Firmicutes	Clostridia	Clostridiales	Hungateiclostridiaceae		Hungateiclostridiaceae bacterium KB18
DFPSDPVEQLK	174173	Butyrivibrio	Genus	Bacteria		Firmicutes	Clostridia	Clostridiales	Lachnospiraceae	Butyrivibrio
DFPVKDPFVELVK	2308.69	Clostridiales	Order	Bacteria		Firmicutes	Clostridia	Clostridiales
DFQELMNTK	2958.19	Mus musculus	Species	Eukaryota	Metazoa	Chordata	Mammalia	Rodentia	Muridae	Mus	Mus musculus
DFQLFSSPLGK	3246.65	Mus musculus	Species	Eukaryota	Metazoa	Chordata	Mammalia	Rodentia	Muridae	Mus	Mus musculus
DFQSLQQNVER	3377.4	Mus musculus	Species	Eukaryota	Metazoa	Chordata	Mammalia	Rodentia	Muridae	Mus	Mus musculus
DFQTDPGNLGIFPR	2512.25	Mucispirillum schaedleri	Species	Bacteria		Deferribacteres	Deferribacteres	Deferribacterales	Deferribacteraceae	Mucispirillum	Mucispirillum schaedleri
DFQTLLTETPK	4769.09	Mus musculus	Species	Eukaryota	Metazoa	Chordata	Mammalia	Rodentia	Muridae	Mus	Mus musculus
DFSALESQLQDTQELLQEENR	84.5602	Mammalia	Class	Eukaryota	Metazoa	Chordata	Mammalia
DFSATDLTEFAAR	4905.04	Rodentia	Order	Eukaryota	Metazoa	Chordata	Mammalia	Rodentia
DFSDKLVEDAK	2916.23	Rikenellaceae	Family	Bacteria		Bacteroidetes	Bacteroidia	Bacteroidales	Rikenellaceae
DFSGILTQGGTILGTSR	1505.09	Firmicutes	Phylum	Bacteria		Firmicutes
DFSINMISK	8917.18	Firmicutes	Phylum	Bacteria		Firmicutes
DFSSELILK	2056.47	Butyricicoccus pullicaecorum	Species	Bacteria		Firmicutes	Clostridia	Clostridiales	Clostridiaceae	Butyricicoccus	Butyricicoccus pullicaecorum
DFSWNSSAK	4484.08	Bacteria	Superkingdom	Bacteria
DFTATFGPLDSLNTR	2763.98	Mammalia	Class	Eukaryota	Metazoa	Chordata	Mammalia
DFTPAAQAAFQK	6223.89	Eukaryota	Superkingdom	Eukaryota
DFTPSGIAGAFR	12339.1	Muridae	Family	Eukaryota	Metazoa	Chordata	Mammalia	Rodentia	Muridae
DFTTTLGQVK	4100.19	Lachnospiraceae bacterium MD335	Species	Bacteria		Firmicutes	Clostridia	Clostridiales	Lachnospiraceae		Lachnospiraceae bacterium MD335
DFVAEPMGEKPVGSLAGIGDVLSK	1071.45	Mus musculus	Species	Eukaryota	Metazoa	Chordata	Mammalia	Rodentia	Muridae	Mus	Mus musculus
DFVEILDGR	46162	Mus musculus	Species	Eukaryota	Metazoa	Chordata	Mammalia	Rodentia	Muridae	Mus	Mus musculus
DFVEILDGRDSDAPVQGR	5264.68	Mus musculus	Species	Eukaryota	Metazoa	Chordata	Mammalia	Rodentia	Muridae	Mus	Mus musculus
DFVTTEVEPMWDAADVMR	479.942	Bacteria	Superkingdom	Bacteria
DFVYSWQR	3431.14	Bacteria	Superkingdom	Bacteria
DFYDTYEEAK	5964.34	Lachnospiraceae bacterium A4	Species	Bacteria		Firmicutes	Clostridia	Clostridiales	Lachnospiraceae		Lachnospiraceae bacterium A4
DFYEMFPEK	1828.16	Bacteria	Superkingdom	Bacteria
DFYEMFPQK	5426.77	Lachnospiraceae bacterium A4	Species	Bacteria		Firmicutes	Clostridia	Clostridiales	Lachnospiraceae		Lachnospiraceae bacterium A4
DFYGENIK	7308.28	Eukaryota	Superkingdom	Eukaryota
DFYMTDSISR	3753.64	Chordata	Phylum	Eukaryota	Metazoa	Chordata
DFYNPLVPEAQK	18858.5	Chordata	Phylum	Eukaryota	Metazoa	Chordata
DFYNPMVASGQK	9259.78	Mammalia	Class	Eukaryota	Metazoa	Chordata	Mammalia
DGAAEADPEAAPINAGK	2310.43	Lachnospiraceae bacterium MD335	Species	Bacteria		Firmicutes	Clostridia	Clostridiales	Lachnospiraceae		Lachnospiraceae bacterium MD335
DGAEADLGYTAIYTQDGLVANK	1153.29	Anaerotruncus sp. G3(2012)	Species	Bacteria		Firmicutes	Clostridia	Clostridiales	Ruminococcaceae	Anaerotruncus	Anaerotruncus sp. G3(2012)
DGAFDFFPVLR	877.614	Mus musculus	Species	Eukaryota	Metazoa	Chordata	Mammalia	Rodentia	Muridae	Mus	Mus musculus
DGAFGLIEPEFH	1984.84	Lachnospiraceae bacterium M18-1	Species	Bacteria		Firmicutes	Clostridia	Clostridiales	Lachnospiraceae		Lachnospiraceae bacterium M18-1
DGAIDPETLTASTK	99780.4	Firmicutes	Phylum	Bacteria		Firmicutes
DGAISYVMFK	3253.34	Anaerotruncus sp. G3(2012)	Species	Bacteria		Firmicutes	Clostridia	Clostridiales	Ruminococcaceae	Anaerotruncus	Anaerotruncus sp. G3(2012)
DGANSNAPVLSK	7837.52	Mus musculus	Species	Eukaryota	Metazoa	Chordata	Mammalia	Rodentia	Muridae	Mus	Mus musculus
DGAPVATIK	6452.9	Firmicutes	Phylum	Bacteria		Firmicutes
DGASEEETNLSK	1642.03	Rodentia	Order	Eukaryota	Metazoa	Chordata	Mammalia	Rodentia
DGAVLPIIQVNGFK	850.457	Lactobacillus	Genus	Bacteria		Firmicutes	Bacilli	Lactobacillales	Lactobacillaceae	Lactobacillus
DGDENPGYVGNMK	2649.47	Lachnospiraceae bacterium A4	Species	Bacteria		Firmicutes	Clostridia	Clostridiales	Lachnospiraceae		Lachnospiraceae bacterium A4
DGDGNDNDSLYK	4589.19	Lachnospiraceae bacterium A4	Species	Bacteria		Firmicutes	Clostridia	Clostridiales	Lachnospiraceae		Lachnospiraceae bacterium A4
DGDIEEPEQPSDGK	992.391	Lachnospiraceae bacterium 28-4	Species	Bacteria		Firmicutes	Clostridia	Clostridiales	Lachnospiraceae		Lachnospiraceae bacterium 28-4
DGDLLIGETMQYTK	3755.61	Oscillibacter sp. 1-3	Species	Bacteria		Firmicutes	Clostridia	Clostridiales	Oscillospiraceae	Oscillibacter	Oscillibacter sp. 1-3
DGDLVDWWTQQSANNFK	3440.34	Mammalia	Class	Eukaryota	Metazoa	Chordata	Mammalia
DGDMTVQQYINSVAK	1076.38	Clostridium sp. MD294	Species	Bacteria		Firmicutes	Clostridia	Clostridiales	Clostridiaceae	Clostridium	Clostridium sp. MD294
DGDSIIFFNFRPDR	1897.81	Bacteria	Superkingdom	Bacteria
DGDSYVINGSK	967.261	Bacteria	Superkingdom	Bacteria
DGDTVWNPGWQPSK	659.899	Clostridium	Genus	Bacteria		Firmicutes	Clostridia	Clostridiales	Clostridiaceae	Clostridium
DGDVILFR	11752.4	Bacteria	Superkingdom	Bacteria
DGDVILLENTR	31234.7	Bacteria	Superkingdom	Bacteria
DGDVIVMGFDSDK	1529.28	Firmicutes bacterium ASF500	Species	Bacteria		Firmicutes					Firmicutes bacterium ASF500
DGDVVLLENTR	11092.8	Bacteria	Superkingdom	Bacteria
DGEAITGMGLYK	8740.16	Lachnospiraceae bacterium A4	Species	Bacteria		Firmicutes	Clostridia	Clostridiales	Lachnospiraceae		Lachnospiraceae bacterium A4
DGEALDEAPK	7280.85	Lachnospiraceae bacterium MD335	Species	Bacteria		Firmicutes	Clostridia	Clostridiales	Lachnospiraceae		Lachnospiraceae bacterium MD335
DGEAPDPEDPSR	1959.53	Mammalia	Class	Eukaryota	Metazoa	Chordata	Mammalia
DGEEAGAYDGPR	8560.6	Metazoa	Kingdom	Eukaryota	Metazoa
DGEITDETR	87342.7	Bacteria	Superkingdom	Bacteria
DGETFGLEK	22012	Lachnospiraceae	Family	Bacteria		Firmicutes	Clostridia	Clostridiales	Lachnospiraceae
DGETFQLMELYGR	1616.11	Muridae	Family	Eukaryota	Metazoa	Chordata	Mammalia	Rodentia	Muridae
DGETFQLMGLYGR	93735.4	Mus	Genus	Eukaryota	Metazoa	Chordata	Mammalia	Rodentia	Muridae	Mus
DGETFQLMGLYGREPDLSSDIK	2322.26	Mus	Genus	Eukaryota	Metazoa	Chordata	Mammalia	Rodentia	Muridae	Mus
DGETFQLMGLYGREPDLSSDIKER	3378.05	Mus	Genus	Eukaryota	Metazoa	Chordata	Mammalia	Rodentia	Muridae	Mus
DGEVILLENTR	21526	Firmicutes	Phylum	Bacteria		Firmicutes
DGEVLLLQNTR	12125	Clostridiales	Order	Bacteria		Firmicutes	Clostridia	Clostridiales
DGEWVANK	2602.99	Bacteria	Superkingdom	Bacteria
DGEYIATDR	13805.4	Butyricicoccus pullicaecorum	Species	Bacteria		Firmicutes	Clostridia	Clostridiales	Clostridiaceae	Butyricicoccus	Butyricicoccus pullicaecorum
DGFAYFDTHYYGGIK	1254.03	Lachnospiraceae bacterium MD335	Species	Bacteria		Firmicutes	Clostridia	Clostridiales	Lachnospiraceae		Lachnospiraceae bacterium MD335
DGFDENMYLDPATR	8418.42	Lachnospiraceae bacterium A4	Species	Bacteria		Firmicutes	Clostridia	Clostridiales	Lachnospiraceae		Lachnospiraceae bacterium A4
DGFGFADGTLLQLTK	896.653	Rodentia	Order	Eukaryota	Metazoa	Chordata	Mammalia	Rodentia
[truncated: 12,565 more rows]

## Sheet: Taxa_DDA-MQ
Sequence	Intensity	LCA	Rank	Superkingdom	Kingdom	Phylum	Class	Order	Family	Genus	Species
NVAQGPGFK	80929	Oscillibacter sp. 1-3	Species	Bacteria		Firmicutes	Clostridia	Clostridiales	Oscillospiraceae	Oscillibacter	Oscillibacter sp. 1-3
IIETVPGATVVAVSDYVAAAADETAAK	15114	Oscillibacter sp. KLE 1745	Species	Bacteria		Firmicutes	Clostridia	Clostridiales	Oscillospiraceae	Oscillibacter	Oscillibacter sp. KLE 1745
FIEAYDIEFCK	26402.5	Oscillibacter	Genus	Bacteria		Firmicutes	Clostridia	Clostridiales	Oscillospiraceae	Oscillibacter
SQSAFSEDGLPVGAGLEDLGK	1301800	Clostridiales	Order	Bacteria		Firmicutes	Clostridia	Clostridiales
DISGFTHGVGWCAPQQGACK	1.14083e+06	Bacteria	Superkingdom	Bacteria
DGNHGCAPIPEEAK	1.65283e+06	Lachnospiraceae bacterium A4	Species	Bacteria		Firmicutes	Clostridia	Clostridiales	Lachnospiraceae		Lachnospiraceae bacterium A4
SQVGTMYGTLK	6536000	Firmicutes	Phylum	Bacteria		Firmicutes
YLEMAEGYVTGIALDADDK	139534	Roseburia	Genus	Bacteria		Firmicutes	Clostridia	Clostridiales	Lachnospiraceae	Roseburia
TVMEALNTDLVCDAINTAMR	437790	Clostridiales	Order	Bacteria		Firmicutes	Clostridia	Clostridiales
FGIVEGLMTTVHSVTPTQK	34459	Oscillibacter	Genus	Bacteria		Firmicutes	Clostridia	Clostridiales	Oscillospiraceae	Oscillibacter
VPTLDVSVVDLTAR	80216	Bacteria	Superkingdom	Bacteria
NYTPYDGDQSFLEEATEATTK	38310	Lactobacillus	Genus	Bacteria		Firmicutes	Bacilli	Lactobacillales	Lactobacillaceae	Lactobacillus
VALAAYGMEIDPETER	96243.7	Lactobacillus	Genus	Bacteria		Firmicutes	Bacilli	Lactobacillales	Lactobacillaceae	Lactobacillus
HEIGQSAVNALRK	25020	Bacteria	Superkingdom	Bacteria
VGIYYLETGASMRPSK	52761	Bacteria	Superkingdom	Bacteria
AMIYNGEEFYESK	263970	Bacteria	Superkingdom	Bacteria
YDINPIIDR	549330	Bacteria	Superkingdom	Bacteria
VVTLGEIMLR	129833	Bacteria	Superkingdom	Bacteria
ESFSATHNGWK	5664.7	Bacteria	Superkingdom	Bacteria
YVISTLR	129042	Bacteria	Superkingdom	Bacteria
ALLDGTVFR	244127	Bacteria	Superkingdom	Bacteria
MTTPLVEMDGDEMTR	249893	Bacteria	Superkingdom	Bacteria
LINNVMLDGK	589010	Firmicutes	Phylum	Bacteria		Firmicutes
LINNVMLDGKK	212000	Firmicutes	Phylum	Bacteria		Firmicutes
DVLADPLYNNK	1878400	Firmicutes	Phylum	Bacteria		Firmicutes
RDVLADPLYNNK	197435	Firmicutes	Phylum	Bacteria		Firmicutes
IVYGAFATVEEK	230273	Firmicutes	Phylum	Bacteria		Firmicutes
LANEILDAANNTGAAVK	1.35597e+06	Firmicutes	Phylum	Bacteria		Firmicutes
IGGATYQVPIEVRPDR	699487	Firmicutes	Phylum	Bacteria		Firmicutes
IGGATYQVPIEVRPDRR	3951.3	Firmicutes	Phylum	Bacteria		Firmicutes
IGGATYQVPIEVR	643940	Bacteria	Superkingdom	Bacteria
AEMALHDR	3.82533e+06	Lachnospiraceae	Family	Bacteria		Firmicutes	Clostridia	Clostridiales	Lachnospiraceae
AEMALHDRDVK	1.92727e+06	Lachnospiraceae	Family	Bacteria		Firmicutes	Clostridia	Clostridiales	Lachnospiraceae
AEMALHDRDVKR	194337	Lachnospiraceae	Family	Bacteria		Firmicutes	Clostridia	Clostridiales	Lachnospiraceae
VTHGDDYGIACCVSSMVIGK	395173	Lachnospiraceae	Family	Bacteria		Firmicutes	Clostridia	Clostridiales	Lachnospiraceae
VVSTITSHGPGYLDK	4.55107e+06	Firmicutes	Phylum	Bacteria		Firmicutes
ACSDNGYEVDPEISEFFSTHR	214950	Lachnospiraceae bacterium 28-4	Species	Bacteria		Firmicutes	Clostridia	Clostridiales	Lachnospiraceae		Lachnospiraceae bacterium 28-4
SKETIVGFQTDKPFK	1156400	Lachnospiraceae bacterium A4	Species	Bacteria		Firmicutes	Clostridia	Clostridiales	Lachnospiraceae		Lachnospiraceae bacterium A4
LREELSEQMVALK	882480	Lachnospiraceae	Family	Bacteria		Firmicutes	Clostridia	Clostridiales	Lachnospiraceae
NYHPYDGDESFLAEATQNTK	239560	Lachnospiraceae bacterium 10-1	Species	Bacteria		Firmicutes	Clostridia	Clostridiales	Lachnospiraceae		Lachnospiraceae bacterium 10-1
KTHNAGCFDAYNQEMR	88549.7	Lachnospiraceae	Family	Bacteria		Firmicutes	Clostridia	Clostridiales	Lachnospiraceae
THNAGCFDAYNQEMR	896643	Lachnospiraceae	Family	Bacteria		Firmicutes	Clostridia	Clostridiales	Lachnospiraceae
DAQDGISNTFTIIPGALGK	295113	Clostridiales	Order	Bacteria		Firmicutes	Clostridia	Clostridiales
WENEVNVR	502700	Lachnospiraceae	Family	Bacteria		Firmicutes	Clostridia	Clostridiales	Lachnospiraceae
VMTDEVIR	538263	Lachnospiraceae bacterium 28-4	Species	Bacteria		Firmicutes	Clostridia	Clostridiales	Lachnospiraceae		Lachnospiraceae bacterium 28-4
TSTFLDCYAER	531570	Lachnospiraceae bacterium 10-1	Species	Bacteria		Firmicutes	Clostridia	Clostridiales	Lachnospiraceae		Lachnospiraceae bacterium 10-1
VALYGIDYLIEDK	44665	Clostridiales	Order	Bacteria		Firmicutes	Clostridia	Clostridiales
SFPMEIIEAAR	43284	Roseburia intestinalis	Species	Bacteria		Firmicutes	Clostridia	Clostridiales	Lachnospiraceae	Roseburia	Roseburia intestinalis
VGELQYEGLELLNAK	77372	Bacteria	Superkingdom	Bacteria
DNVIDYKDTAK	938457	Firmicutes	Phylum	Bacteria		Firmicutes
HLALMPYVQD	8156.2	Lachnospiraceae bacterium 2_1_46FAA	Species	Bacteria		Firmicutes	Clostridia	Clostridiales	Lachnospiraceae		Lachnospiraceae bacterium 2_1_46FAA
VCVFCGK	1.00918e+06	Firmicutes	Phylum	Bacteria		Firmicutes
MPIAIPAGVTVDIAENNK	53856	Firmicutes	Phylum	Bacteria		Firmicutes
YADETIRR	151573	Bacteria	Superkingdom	Bacteria
VGQFAAEIR	1.75277e+06	Bacteria	Superkingdom	Bacteria
VGIIGAGTMGQGIAK	207900	Firmicutes	Phylum	Bacteria		Firmicutes
TPVQVNEAAGFVVNR	569270	Bacteria	Superkingdom	Bacteria
GFYVYNADR	190990	Firmicutes	Phylum	Bacteria		Firmicutes
MEGVSDIAGIDAAMK	16514	Firmicutes	Phylum	Bacteria		Firmicutes
ISEEIGKTPVQVNEAAGFVVNR	83592.7	Firmicutes	Phylum	Bacteria		Firmicutes
IVTLGEIMLR	51061	Bacteria	Superkingdom	Bacteria
TKEIVELAHAK	22130.3	Lactobacillales	Order	Bacteria		Firmicutes	Bacilli	Lactobacillales
AGDQVIYSK	185820	Clostridiales	Order	Bacteria		Firmicutes	Clostridia	Clostridiales
ILAAAQVNPDTR	137147	Lachnospiraceae bacterium 10-1	Species	Bacteria		Firmicutes	Clostridia	Clostridiales	Lachnospiraceae		Lachnospiraceae bacterium 10-1
LQEIGCYR	1369800	Bacteria	Superkingdom	Bacteria
ELTDDEVKR	118730	Firmicutes	Phylum	Bacteria		Firmicutes
VRELTDDEVKR	235387	Firmicutes	Phylum	Bacteria		Firmicutes
DAAPALTQFYVYSVSSEK	145840	Lachnospiraceae bacterium 10-1	Species	Bacteria		Firmicutes	Clostridia	Clostridiales	Lachnospiraceae		Lachnospiraceae bacterium 10-1
SATLNSTNMTLK	418830	Lachnospiraceae bacterium 10-1	Species	Bacteria		Firmicutes	Clostridia	Clostridiales	Lachnospiraceae		Lachnospiraceae bacterium 10-1
YENSYGFEAGTFK	253723	Lachnospiraceae bacterium 10-1	Species	Bacteria		Firmicutes	Clostridia	Clostridiales	Lachnospiraceae		Lachnospiraceae bacterium 10-1
AFAEVLNNLDVK	96002	Lactobacillus	Genus	Bacteria		Firmicutes	Bacilli	Lactobacillales	Lactobacillaceae	Lactobacillus
GLNVLDVVNSDK	59826.5	Lactobacillus	Genus	Bacteria		Firmicutes	Bacilli	Lactobacillales	Lactobacillaceae	Lactobacillus
SGIILAGSAQEKPQEAEVVAVGPGGMVDGK	53906	Clostridiales	Order	Bacteria		Firmicutes	Clostridia	Clostridiales
AHDENNECNIGDTVK	412570	Firmicutes	Phylum	Bacteria		Firmicutes
LKAHDENNECNIGDTVK	134305	Firmicutes	Phylum	Bacteria		Firmicutes
VMETRPLSK	2190890	Bacteria	Superkingdom	Bacteria
TIVVAVEDHVK	488793	Firmicutes	Phylum	Bacteria		Firmicutes
VLEEGGWIYNSK	2138.6	Firmicutes	Phylum	Bacteria		Firmicutes
KGTDANEALKK	35221.3	Bacteria	Superkingdom	Bacteria
SQVGTLYGTLAK	200870	Bacteria	Superkingdom	Bacteria
YLEMAEGYIK	125640	Bacteria	Superkingdom	Bacteria
IAAENATFAQPETGLGIIPGFGGTQR	68321	Clostridiales	Order	Bacteria		Firmicutes	Clostridia	Clostridiales
KYLLDVPVSDITR	9151.25	Lachnospiraceae bacterium MD335	Species	Bacteria		Firmicutes	Clostridia	Clostridiales	Lachnospiraceae		Lachnospiraceae bacterium MD335
ELASFAQFGSDLDADTK	213740	Clostridiales	Order	Bacteria		Firmicutes	Clostridia	Clostridiales
ELASFAQFGSDLDADTKER	121852	Lachnospiraceae bacterium A4	Species	Bacteria		Firmicutes	Clostridia	Clostridiales	Lachnospiraceae		Lachnospiraceae bacterium A4
TLVAAIEEFK	286190	Lachnospiraceae	Family	Bacteria		Firmicutes	Clostridia	Clostridiales	Lachnospiraceae
TLVAAIEEFKGR	40076.7	Lachnospiraceae	Family	Bacteria		Firmicutes	Clostridia	Clostridiales	Lachnospiraceae
MNLRPEEISSVIK	754157	Firmicutes	Phylum	Bacteria		Firmicutes
MNLRPEEISSVIKDQIK	152853	Firmicutes	Phylum	Bacteria		Firmicutes
SVDTPMQTGIK	446160	Lachnospiraceae bacterium A4	Species	Bacteria		Firmicutes	Clostridia	Clostridiales	Lachnospiraceae		Lachnospiraceae bacterium A4
VVEVPVGDALLGR	194500	Firmicutes	Phylum	Bacteria		Firmicutes
VASGVITR	386853	Bacteria	Superkingdom	Bacteria
ASTVASIVK	55031.5	Firmicutes	Phylum	Bacteria		Firmicutes
FGYGFVQGANDAAK	217420	Ruminococcus	Genus	Bacteria		Firmicutes	Clostridia	Clostridiales	Ruminococcaceae	Ruminococcus
NFNEAQYETR	144753	Firmicutes	Phylum	Bacteria		Firmicutes
QVSPGVLALR	143840	Firmicutes	Phylum	Bacteria		Firmicutes
DLGNIYEGDELMTEYSK	85201.5	Eubacterium sp. 14-2	Species	Bacteria		Firmicutes	Clostridia	Clostridiales	Eubacteriaceae	Eubacterium	Eubacterium sp. 14-2
APDLVMEGPER	741140	Clostridiales	Order	Bacteria		Firmicutes	Clostridia	Clostridiales
VMTYDPEATSEAR	152837	Lachnospiraceae bacterium 28-4	Species	Bacteria		Firmicutes	Clostridia	Clostridiales	Lachnospiraceae		Lachnospiraceae bacterium 28-4
DLMYQTTQSASGANAETGLGGINAK	15810	Lachnospiraceae bacterium 28-4	Species	Bacteria		Firmicutes	Clostridia	Clostridiales	Lachnospiraceae		Lachnospiraceae bacterium 28-4
MDVIGNNIANVNTTGYK	385795	Clostridiales	Order	Bacteria		Firmicutes	Clostridia	Clostridiales
FNLANFMR	87102.3	Bacteria	Superkingdom	Bacteria
NTITEEASK	742570	Lachnospiraceae bacterium A2	Species	Bacteria		Firmicutes	Clostridia	Clostridiales	Lachnospiraceae		Lachnospiraceae bacterium A2
GTANAIYQNISFIDR	183140	Clostridiales	Order	Bacteria		Firmicutes	Clostridia	Clostridiales
QDYSDFLR	881990	Firmicutes	Phylum	Bacteria		Firmicutes
EMIAMLLAGGQGSR	242524	Bacteria	Superkingdom	Bacteria
HSILFAGVK	340233	Clostridiales	Order	Bacteria		Firmicutes	Clostridia	Clostridiales
LYGGVHVLPPYQQASGSDWYK	157577	Clostridiales	Order	Bacteria		Firmicutes	Clostridia	Clostridiales
EAGWTNYPK	147895	Clostridiales	Order	Bacteria		Firmicutes	Clostridia	Clostridiales
HAVYENQR	122900	Bacteria	Superkingdom	Bacteria
FTGYEGEYYIGQIR	258490	Lachnospiraceae bacterium 28-4	Species	Bacteria		Firmicutes	Clostridia	Clostridiales	Lachnospiraceae		Lachnospiraceae bacterium 28-4
GNLYYYDSAGK	125677	Lachnospiraceae bacterium 28-4	Species	Bacteria		Firmicutes	Clostridia	Clostridiales	Lachnospiraceae		Lachnospiraceae bacterium 28-4
ITLYYNDDTK	252510	Lachnospiraceae bacterium 28-4	Species	Bacteria		Firmicutes	Clostridia	Clostridiales	Lachnospiraceae		Lachnospiraceae bacterium 28-4
LMALDGEDLTYPAAMEK	233715	Lachnospiraceae bacterium 28-4	Species	Bacteria		Firmicutes	Clostridia	Clostridiales	Lachnospiraceae		Lachnospiraceae bacterium 28-4
SGSSNTQTVTLQNK	289990	Lachnospiraceae bacterium 28-4	Species	Bacteria		Firmicutes	Clostridia	Clostridiales	Lachnospiraceae		Lachnospiraceae bacterium 28-4
TLTGTYTIENTTYPSK	188620	Lachnospiraceae bacterium 28-4	Species	Bacteria		Firmicutes	Clostridia	Clostridiales	Lachnospiraceae		Lachnospiraceae bacterium 28-4
VETDDTYREDVK	51991.5	Lachnospiraceae bacterium 28-4	Species	Bacteria		Firmicutes	Clostridia	Clostridiales	Lachnospiraceae		Lachnospiraceae bacterium 28-4
VSISDFQIQK	190790	Lachnospiraceae bacterium 28-4	Species	Bacteria		Firmicutes	Clostridia	Clostridiales	Lachnospiraceae		Lachnospiraceae bacterium 28-4
WTGVTGGTDIAR	45188.2	Lachnospiraceae bacterium 28-4	Species	Bacteria		Firmicutes	Clostridia	Clostridiales	Lachnospiraceae		Lachnospiraceae bacterium 28-4
DYVDGSTPSGSSAYEK	202230	Clostridiales	Order	Bacteria		Firmicutes	Clostridia	Clostridiales
IDVPESWK	141870	Bacteria	Superkingdom	Bacteria
VSAQEGNSLPVSAFK	18898	Firmicutes	Phylum	Bacteria		Firmicutes
GIDKDEIKR	154797	Bacteria	Superkingdom	Bacteria
GITINTAHVEYQTANR	116890	Bacteria	Superkingdom	Bacteria
GSALGALNGEPQWEDK	88027	Bacteroidales	Order	Bacteria		Bacteroidetes	Bacteroidia	Bacteroidales
VGDEVQILGLGADK	13329.1	Bacteroidales	Order	Bacteria		Bacteroidetes	Bacteroidia	Bacteroidales
VGDEVQILGLGADKK	195013	Bacteroidales	Order	Bacteria		Bacteroidetes	Bacteroidia	Bacteroidales
SFDSIDNAPEEK	491647	Bacteria	Superkingdom	Bacteria
SFDSIDNAPEEKER	714273	Bacteria	Superkingdom	Bacteria
IGDASIALPPAK	249107	Lachnospiraceae bacterium A2	Species	Bacteria		Firmicutes	Clostridia	Clostridiales	Lachnospiraceae		Lachnospiraceae bacterium A2
LGDPITLAMDVDK	105177	Lachnospiraceae bacterium A2	Species	Bacteria		Firmicutes	Clostridia	Clostridiales	Lachnospiraceae		Lachnospiraceae bacterium A2
LHVFDKETELTITH	165215	Lachnospiraceae bacterium A2	Species	Bacteria		Firmicutes	Clostridia	Clostridiales	Lachnospiraceae		Lachnospiraceae bacterium A2
AEIASLHQR	465390	Clostridiales	Order	Bacteria		Firmicutes	Clostridia	Clostridiales
LGATIIYVTHDQTEAMTLGTR	43968	Bacteria	Superkingdom	Bacteria
ANVIEFNPGFTPDSK	504023	Lachnospiraceae bacterium A2	Species	Bacteria		Firmicutes	Clostridia	Clostridiales	Lachnospiraceae		Lachnospiraceae bacterium A2
MLQDLADVIGGTVSCSR	134323	Clostridiales	Order	Bacteria		Firmicutes	Clostridia	Clostridiales
ETEDIMEAK	245050	Clostridiales	Order	Bacteria		Firmicutes	Clostridia	Clostridiales
AVVENGWKPVDLQVGQTGK	42961	Clostridiales	Order	Bacteria		Firmicutes	Clostridia	Clostridiales
DLDTDVTAVLIGSGVK	52144	Lachnospiraceae bacterium A2	Species	Bacteria		Firmicutes	Clostridia	Clostridiales	Lachnospiraceae		Lachnospiraceae bacterium A2
IVPALTEALK	217493	Bacteria	Superkingdom	Bacteria
ADLKDVDDSDLGLK	267483	Clostridiales	Order	Bacteria		Firmicutes	Clostridia	Clostridiales
QAIDGDTAQVGPQISEHLDIPVISYAQEIK	18071	Clostridiales	Order	Bacteria		Firmicutes	Clostridia	Clostridiales
VVPDSPEDAVAYITGK	409760	Lachnospiraceae bacterium A2	Species	Bacteria		Firmicutes	Clostridia	Clostridiales	Lachnospiraceae		Lachnospiraceae bacterium A2
EAMAMGADK	1.70267e+06	Firmicutes	Phylum	Bacteria		Firmicutes
EAMAMGADKGILVTDR	303477	Firmicutes	Phylum	Bacteria		Firmicutes
FNPDGTLDR	3659100	Firmicutes	Phylum	Bacteria		Firmicutes
GAMLTIMNPDDK	578313	Firmicutes	Phylum	Bacteria		Firmicutes
GAMLTIMNPDDKAGLEAALR	13001.2	Firmicutes	Phylum	Bacteria		Firmicutes
NLEYDLIITGR	360180	Firmicutes	Phylum	Bacteria		Firmicutes
DVDDSDLGLK	131417	Clostridiales	Order	Bacteria		Firmicutes	Clostridia	Clostridiales
DAGLDVYEQVK	1891100	Clostridiales	Order	Bacteria		Firmicutes	Clostridia	Clostridiales
DAGLDVYEQVKK	1.56653e+06	Clostridiales	Order	Bacteria		Firmicutes	Clostridia	Clostridiales
ENVDVSITGNSTNPTR	3.05337e+06	Bacteria	Superkingdom	Bacteria
VNCYGANSVPEGVAIMWK	495930	Firmicutes	Phylum	Bacteria		Firmicutes
TLHPDNMAAGPASYGFTDTLGR	1.55393e+06	Bacteria	Superkingdom	Bacteria
AADAAAAIGEGLQAFCIPGSVADTRK	166550	Firmicutes	Phylum	Bacteria		Firmicutes
KAADAAAAIGEGLQAFCIPGSVADTR	121083	Firmicutes	Phylum	Bacteria		Firmicutes
DAAQIISR	2818200	Bacteria	Superkingdom	Bacteria
TPSDTGSPEVQIALLTAR	8923.95	Clostridium sp. MD294	Species	Bacteria		Firmicutes	Clostridia	Clostridiales	Clostridiaceae	Clostridium	Clostridium sp. MD294
FISNVDPDDAAAVLK	189200	Clostridiales	Order	Bacteria		Firmicutes	Clostridia	Clostridiales
SGTTLETLTNESFVK	635130	Bacteria	Superkingdom	Bacteria
ETIADSVR	172980	Anopheles stephensi	Species	Eukaryota	Metazoa	Arthropoda	Insecta	Diptera	Culicidae	Anopheles	Anopheles stephensi
ATTQDAEGMVAEGR	68191	Eubacterium plexicaudatum	Species	Bacteria		Firmicutes	Clostridia	Clostridiales	Eubacteriaceae	Eubacterium	Eubacterium plexicaudatum
AVYVQQLR	182300	Prevotella melaninogenica	Species	Bacteria		Bacteroidetes	Bacteroidia	Bacteroidales	Prevotellaceae	Prevotella	Prevotella melaninogenica
AEVVNGDMK	402953	Clostridium sp. MD294	Species	Bacteria		Firmicutes	Clostridia	Clostridiales	Clostridiaceae	Clostridium	Clostridium sp. MD294
TCTIGFGQR	431980	Clostridium sp. MD294	Species	Bacteria		Firmicutes	Clostridia	Clostridiales	Clostridiaceae	Clostridium	Clostridium sp. MD294
VFSMTVGSK	7197	Clostridium sp. MD294	Species	Bacteria		Firmicutes	Clostridia	Clostridiales	Clostridiaceae	Clostridium	Clostridium sp. MD294
YDNQTLK	28114	Bacteria	Superkingdom	Bacteria
FVYGIMEK	188837	Bacteria	Superkingdom	Bacteria
QEYNVSVSGATDR	64327	Alistipes	Genus	Bacteria		Bacteroidetes	Bacteroidia	Bacteroidales	Rikenellaceae	Alistipes
DTVFFTTNCGMQEPLIR	318407	Clostridiales	Order	Bacteria		Firmicutes	Clostridia	Clostridiales
VIDQLGNDDAVLFNTK	117443	Lachnospiraceae	Family	Bacteria		Firmicutes	Clostridia	Clostridiales	Lachnospiraceae
TVVWNGPMGVFENPTLAEGTIAVAK	21001.6	Clostridiales	Order	Bacteria		Firmicutes	Clostridia	Clostridiales
GEPKPELSLAPVAK	839500	Firmicutes	Phylum	Bacteria		Firmicutes
DLASLCDVFVNDAFGTAHR	72137.7	Firmicutes	Phylum	Bacteria		Firmicutes
KLLLPVDAVTIK	181603	Lachnospiraceae	Family	Bacteria		Firmicutes	Clostridia	Clostridiales	Lachnospiraceae
LLLPVDAVTIK	86442.7	Lachnospiraceae	Family	Bacteria		Firmicutes	Clostridia	Clostridiales	Lachnospiraceae
SVDDINVAGKK	718850	Clostridiales	Order	Bacteria		Firmicutes	Clostridia	Clostridiales
AQGNEIGTSLVDDSKVDYCK	129175	Eubacterium plexicaudatum	Species	Bacteria		Firmicutes	Clostridia	Clostridiales	Eubacteriaceae	Eubacterium	Eubacterium plexicaudatum
LNVIDNLLEK	172033	Clostridiales	Order	Bacteria		Firmicutes	Clostridia	Clostridiales
LSELLGQEVK	1.07783e+06	Bacteria	Superkingdom	Bacteria
RLSELLGQEVK	548480	Bacteria	Superkingdom	Bacteria
SVDDINVAGK	462945	Firmicutes	Phylum	Bacteria		Firmicutes
AAVEAMKDGDVILLENTR	309187	Clostridiales	Order	Bacteria		Firmicutes	Clostridia	Clostridiales
SAVANAENNFDLDR	1016400	Lactobacillaceae	Family	Bacteria		Firmicutes	Bacilli	Lactobacillales	Lactobacillaceae
FTAQVYVLTK	261840	Bacteria	Superkingdom	Bacteria
NMITGAAQMDGAILVVAATDGVMAQTK	16858.7	Firmicutes	Phylum	Bacteria		Firmicutes
LGTGEAVAFDMIDK	121858	Clostridiales	Order	Bacteria		Firmicutes	Clostridia	Clostridiales
LGTGEAVAFDMIDKAPEER	746165	Clostridiales	Order	Bacteria		Firmicutes	Clostridia	Clostridiales
ALEDPNSEWGDK	782373	Clostridiales	Order	Bacteria		Firmicutes	Clostridia	Clostridiales
VVTISGPDGYVYDPDGVVTPEK	190313	Anaerotignum propionicum	Species	Bacteria		Firmicutes	Clostridia	Clostridiales	Lachnospiraceae	Anaerotignum	Anaerotignum propionicum
HEGDTFEGK	8272.6	Firmicutes	Phylum	Bacteria		Firmicutes
FCQAFMTELYR	118673	Bacteria	Superkingdom	Bacteria
AVNAGGVAVSALEMCQNSMR	89947	Clostridium sp. MD294	Species	Bacteria		Firmicutes	Clostridia	Clostridiales	Clostridiaceae	Clostridium	Clostridium sp. MD294
IDYLVEMR	96658	Firmicutes	Phylum	Bacteria		Firmicutes
YSWEAEEVDEKLK	147073	Clostridium sp. MD294	Species	Bacteria		Firmicutes	Clostridia	Clostridiales	Clostridiaceae	Clostridium	Clostridium sp. MD294
VTWVDDAGK	349050	Bacteria	Superkingdom	Bacteria
AGDYPDVVHCATGR	420737	Clostridiales	Order	Bacteria		Firmicutes	Clostridia	Clostridiales
EAGLTETLAR	543813	Lachnospiraceae bacterium 28-4	Species	Bacteria		Firmicutes	Clostridia	Clostridiales	Lachnospiraceae		Lachnospiraceae bacterium 28-4
GLLPLTDVMDMTVPGEDVK	180070	Lachnospiraceae bacterium 28-4	Species	Bacteria		Firmicutes	Clostridia	Clostridiales	Lachnospiraceae		Lachnospiraceae bacterium 28-4
TVDEWIAAVTEVSDK	82714.5	Lachnospiraceae bacterium 28-4	Species	Bacteria		Firmicutes	Clostridia	Clostridiales	Lachnospiraceae		Lachnospiraceae bacterium 28-4
NQQLILDDK	722540	Firmicutes	Phylum	Bacteria		Firmicutes
DGAIDPETLTASTK	683427	Firmicutes	Phylum	Bacteria		Firmicutes
NIETASVFEK	250220	Lachnospiraceae bacterium A4	Species	Bacteria		Firmicutes	Clostridia	Clostridiales	Lachnospiraceae		Lachnospiraceae bacterium A4
NLEAAFAGESQAR	4138100	Bacteria	Superkingdom	Bacteria
AAEADYQENVNK	272570	Lachnospiraceae bacterium A2	Species	Bacteria		Firmicutes	Clostridia	Clostridiales	Lachnospiraceae		Lachnospiraceae bacterium A2
AAEADYQENVNKDFK	196080	Lachnospiraceae bacterium A2	Species	Bacteria		Firmicutes	Clostridia	Clostridiales	Lachnospiraceae		Lachnospiraceae bacterium A2
DGKPNITGNDTLK	419653	Lachnospiraceae	Family	Bacteria		Firmicutes	Clostridia	Clostridiales	Lachnospiraceae
HYGVPLDGGTVISAYR	165650	Lachnospiraceae bacterium A2	Species	Bacteria		Firmicutes	Clostridia	Clostridiales	Lachnospiraceae		Lachnospiraceae bacterium A2
IDYSTIEGK	391337	Lachnospiraceae	Family	Bacteria		Firmicutes	Clostridia	Clostridiales	Lachnospiraceae
TIEQSPYHYTCR	160500	Lachnospiraceae bacterium A2	Species	Bacteria		Firmicutes	Clostridia	Clostridiales	Lachnospiraceae		Lachnospiraceae bacterium A2
VDLLEEAGYSIDDMK	129990	Lachnospiraceae bacterium A2	Species	Bacteria		Firmicutes	Clostridia	Clostridiales	Lachnospiraceae		Lachnospiraceae bacterium A2
WEITTMPTLK	323220	Lachnospiraceae bacterium A2	Species	Bacteria		Firmicutes	Clostridia	Clostridiales	Lachnospiraceae		Lachnospiraceae bacterium A2
DFLAYTFGK	225680	Lachnospiraceae	Family	Bacteria		Firmicutes	Clostridia	Clostridiales	Lachnospiraceae
NDQGEQMNQIR	45831	Clostridiales	Order	Bacteria		Firmicutes	Clostridia	Clostridiales
ATYVGADAR	623520	Clostridiales	Order	Bacteria		Firmicutes	Clostridia	Clostridiales
ENISIMDGK	93215	Clostridiales	Order	Bacteria		Firmicutes	Clostridia	Clostridiales
GAYTGEISPGMLTDAGVK	21454	Lachnospiraceae bacterium 28-4	Species	Bacteria		Firmicutes	Clostridia	Clostridiales	Lachnospiraceae		Lachnospiraceae bacterium 28-4
GTNIQIGAENMYYEEK	162730	Lachnospiraceae bacterium 28-4	Species	Bacteria		Firmicutes	Clostridia	Clostridiales	Lachnospiraceae		Lachnospiraceae bacterium 28-4
EQGITIDWIR	458333	Clostridiales	Order	Bacteria		Firmicutes	Clostridia	Clostridiales
EYFAETDETVNK	175330	Firmicutes	Phylum	Bacteria		Firmicutes
EYFAETDETVNKK	1.21503e+06	Firmicutes	Phylum	Bacteria		Firmicutes
AFEHEITPIICCGESLTQR	93667.5	Lachnospiraceae bacterium 28-4	Species	Bacteria		Firmicutes	Clostridia	Clostridiales	Lachnospiraceae		Lachnospiraceae bacterium 28-4
FSLNSSK	118490	Eukaryota	Superkingdom	Eukaryota
YVDFFAEAR	51590	Bacteroidales	Order	Bacteria		Bacteroidetes	Bacteroidia	Bacteroidales
FSIFDYR	37212.7	Lachnospiraceae bacterium 10-1	Species	Bacteria		Firmicutes	Clostridia	Clostridiales	Lachnospiraceae		Lachnospiraceae bacterium 10-1
IEEISGVESVVGR	120450	Lachnospiraceae bacterium 10-1	Species	Bacteria		Firmicutes	Clostridia	Clostridiales	Lachnospiraceae		Lachnospiraceae bacterium 10-1
DLLTEYDYPGDDIPVVR	1699950	Lactobacillus	Genus	Bacteria		Firmicutes	Bacilli	Lactobacillales	Lactobacillaceae	Lactobacillus
VGDEVEIVGLVEDVKK	136544	Lactobacillus	Genus	Bacteria		Firmicutes	Bacilli	Lactobacillales	Lactobacillaceae	Lactobacillus
ELVCEAQNTGLIGSK	134083	Lactobacillus	Genus	Bacteria		Firmicutes	Bacilli	Lactobacillales	Lactobacillaceae	Lactobacillus
GNPTVEAEVYTEAGGVGR	119792	Lactobacillaceae	Family	Bacteria		Firmicutes	Bacilli	Lactobacillales	Lactobacillaceae
IEDQLGDVAQYK	230200	Lactobacillales	Order	Bacteria		Firmicutes	Bacilli	Lactobacillales
LNQIGTLTETVEAIEMAK	48727.5	Lactobacillaceae	Family	Bacteria		Firmicutes	Bacilli	Lactobacillales	Lactobacillaceae
EAGYTAIVSHR	808085	Firmicutes	Phylum	Bacteria		Firmicutes
DATVDQLGQANK	87463.5	Lactobacillus	Genus	Bacteria		Firmicutes	Bacilli	Lactobacillales	Lactobacillaceae	Lactobacillus
NVVLEQSYGTPTITNDGVTIAK	36616.3	Lactobacillales	Order	Bacteria		Firmicutes	Bacilli	Lactobacillales
STFVGPTAVAFSDEDPIAPAK	122495	Lactobacillus	Genus	Bacteria		Firmicutes	Bacilli	Lactobacillales	Lactobacillaceae	Lactobacillus
GVNPNSFDGR	942097	Bacteria	Superkingdom	Bacteria
SITLTSTMGPGVK	155413	Firmicutes	Phylum	Bacteria		Firmicutes
AGTVTMDVAK	411603	Bacteria	Superkingdom	Bacteria
LINNIMLDGKK	459050	Bacteria	Superkingdom	Bacteria
WLTMFSR	98805.3	Firmicutes	Phylum	Bacteria		Firmicutes
SITLSSTMGPGVK	518500	Lachnospiraceae	Family	Bacteria		Firmicutes	Clostridia	Clostridiales	Lachnospiraceae
AGTVTMDVTK	2850300	Bacteria	Superkingdom	Bacteria
IDGDSVIVER	631520	Butyrivibrio	Genus	Bacteria		Firmicutes	Clostridia	Clostridiales	Lachnospiraceae	Butyrivibrio
QAIDGDTAQVGPQISEHLGIPVISYAQNIK	38398	Clostridiales	Order	Bacteria		Firmicutes	Clostridia	Clostridiales
ADITVWGR	74906.4	Firmicutes	Phylum	Bacteria		Firmicutes
YMTPGGIFDAYK	1.19765e+06	Firmicutes	Phylum	Bacteria		Firmicutes
MPCLITALAELNEPR	302885	Firmicutes	Phylum	Bacteria		Firmicutes
ANLVDVEDSNLGLK	388455	Lachnospiraceae bacterium 28-4	Species	Bacteria		Firmicutes	Clostridia	Clostridiales	Lachnospiraceae		Lachnospiraceae bacterium 28-4
SIGQFQNTQFQLADMATK	637250	Clostridiales	Order	Bacteria		Firmicutes	Clostridia	Clostridiales
VYSVEAAK	1794800	Clostridiales	Order	Bacteria		Firmicutes	Clostridia	Clostridiales
MVISGALLK	260350	Firmicutes	Phylum	Bacteria		Firmicutes
AGFMGIPIPK	433477	Firmicutes	Phylum	Bacteria		Firmicutes
VEAAQLLVYK	654017	Firmicutes	Phylum	Bacteria		Firmicutes
LYAAEVAMEVTTK	800847	Firmicutes	Phylum	Bacteria		Firmicutes
GTPGFTFGTK	1.39853e+06	Firmicutes	Phylum	Bacteria		Firmicutes
GSSTYELIFTDCR	629793	Firmicutes	Phylum	Bacteria		Firmicutes
IGIASQALGLAEGALER	317903	Clostridiales	Order	Bacteria		Firmicutes	Clostridia	Clostridiales
EITAFIVEK	150700	Lachnospiraceae bacterium 28-4	Species	Bacteria		Firmicutes	Clostridia	Clostridiales	Lachnospiraceae		Lachnospiraceae bacterium 28-4
GFGIAMHTLDGGR	429323	Firmicutes	Phylum	Bacteria		Firmicutes
KIGAFGLTEPGAGTDAQGQQTK	386560	Firmicutes	Phylum	Bacteria		Firmicutes
IFITNGK	101896	Firmicutes	Phylum	Bacteria		Firmicutes
AVQLHGGYGYTR	235397	Bacteria	Superkingdom	Bacteria
MLDEDPEQFAK	58523.3	Firmicutes bacterium ASF500	Species	Bacteria		Firmicutes					Firmicutes bacterium ASF500
LGIPEDGNLAGR	16811	Firmicutes bacterium ASF500	Species	Bacteria		Firmicutes					Firmicutes bacterium ASF500
NPEDLDKTDAAAAEYIK	97201.3	Firmicutes	Phylum	Bacteria		Firmicutes
LVVGTQCR	90705	Bacteria	Superkingdom	Bacteria
DGSNIMAEMATQCYAGNAAR	25364	Firmicutes	Phylum	Bacteria		Firmicutes
ILYQDAMGR	209260	Bacteria	Superkingdom	Bacteria
EFAQELEEHGR	3697.24	Firmicutes	Phylum	Bacteria		Firmicutes
IVPALTAALKDELGK	436220	Eubacterium plexicaudatum	Species	Bacteria		Firmicutes	Clostridia	Clostridiales	Eubacteriaceae	Eubacterium	Eubacterium plexicaudatum
SAENIMDAK	586010	Eubacterium plexicaudatum	Species	Bacteria		Firmicutes	Clostridia	Clostridiales	Eubacteriaceae	Eubacterium	Eubacterium plexicaudatum
VATGLTADCTQLEIGDFPLK	260750	Eubacterium plexicaudatum	Species	Bacteria		Firmicutes	Clostridia	Clostridiales	Eubacteriaceae	Eubacterium	Eubacterium plexicaudatum
VIVVDDPALEVYK	227323	Eubacterium plexicaudatum	Species	Bacteria		Firmicutes	Clostridia	Clostridiales	Eubacteriaceae	Eubacterium	Eubacterium plexicaudatum
LAEYGADK	85135	Clostridiales	Order	Bacteria		Firmicutes	Clostridia	Clostridiales
LGAFGLTEPGAGTDAQGCQTK	449010	Lachnospiraceae	Family	Bacteria		Firmicutes	Clostridia	Clostridiales	Lachnospiraceae
GSSTYELIFEDCR	148907	Clostridiales	Order	Bacteria		Firmicutes	Clostridia	Clostridiales
GSSTYELIFEDCRIPK	80041	Clostridiales	Order	Bacteria		Firmicutes	Clostridia	Clostridiales
SIAQQQNTQFK	1399100	Clostridiales	Order	Bacteria		Firmicutes	Clostridia	Clostridiales
GFPIAMHTLDGGR	1953500	Firmicutes	Phylum	Bacteria		Firmicutes
AGFMGIPVPK	195797	Firmicutes	Phylum	Bacteria		Firmicutes
GTPGFSFGTK	1.42873e+06	Bacteria	Superkingdom	Bacteria
DALLGPEGK	13675	Clostridiales	Order	Bacteria		Firmicutes	Clostridia	Clostridiales
EYGGQGCDPLTYTMCVEELSK	109248	Clostridium	Genus	Bacteria		Firmicutes	Clostridia	Clostridiales	Clostridiaceae	Clostridium
AIAEGKFDDEIVPVPVK	1.85027e+06	Clostridiales	Order	Bacteria		Firmicutes	Clostridia	Clostridiales
MGGALSNTPAADLGAIVIK	1.09293e+06	Firmicutes	Phylum	Bacteria		Firmicutes
AGLPNEVPAVTLNVVCGSGLK	238800	Eubacterium plexicaudatum	Species	Bacteria		Firmicutes	Clostridia	Clostridiales	Eubacteriaceae	Eubacterium	Eubacterium plexicaudatum
AGVKPEQVDEVLMGCVIQAAQGQNVAR	35127.3	Firmicutes	Phylum	Bacteria		Firmicutes
EELDAFAANSQQK	627490	Bacteria	Superkingdom	Bacteria
FDDEIVPVPVK	745513	Bacteria	Superkingdom	Bacteria
KVTEDLYWVGVNDK	36382.5	Firmicutes	Phylum	Bacteria		Firmicutes
VTEDLYWVGVNDKR	10956.8	Firmicutes	Phylum	Bacteria		Firmicutes
YFCNIVGK	202717	Bacteria	Superkingdom	Bacteria
FNIYAMEEAGK	122977	Eubacterium sp. 14-2	Species	Bacteria		Firmicutes	Clostridia	Clostridiales	Eubacteriaceae	Eubacterium	Eubacterium sp. 14-2
HVPVYIQEDMVGHK	204337	Bacteria	Superkingdom	Bacteria
KGPYVAPELLK	105027	Firmicutes	Phylum	Bacteria		Firmicutes
GFDAATITQEDVDTYGT	61151	Firmicutes bacterium ASF500	Species	Bacteria		Firmicutes					Firmicutes bacterium ASF500
GAVAALDAAGITHGK	3114	Firmicutes	Phylum	Bacteria		Firmicutes
TITQSVIDSGKPFNVIYAENNGMAR	88251	Oscillibacter sp. 1-3	Species	Bacteria		Firmicutes	Clostridia	Clostridiales	Oscillospiraceae	Oscillibacter	Oscillibacter sp. 1-3
GFAVVADQIR	376807	Bacteria	Superkingdom	Bacteria
FSNSEYDAAMDTSR	377200	Lachnospiraceae bacterium 28-4	Species	Bacteria		Firmicutes	Clostridia	Clostridiales	Lachnospiraceae		Lachnospiraceae bacterium 28-4
NGEYDVAR	120245	Lachnospiraceae bacterium 28-4	Species	Bacteria		Firmicutes	Clostridia	Clostridiales	Lachnospiraceae		Lachnospiraceae bacterium 28-4
WSDGTPLTANDFVYSWK	141640	Clostridiales	Order	Bacteria		Firmicutes	Clostridia	Clostridiales
NPNYWNADAIK	1.04225e+06	Firmicutes	Phylum	Bacteria		Firmicutes
TTLDAAER	87857	Bacteria	Superkingdom	Bacteria
MDQCALQLR	226200	Alistipes shahii	Species	Bacteria		Bacteroidetes	Bacteroidia	Bacteroidales	Rikenellaceae	Alistipes	Alistipes shahii
NMSSVFNELK	3123.4	Alistipes	Genus	Bacteria		Bacteroidetes	Bacteroidia	Bacteroidales	Rikenellaceae	Alistipes
SQIVNSTDIQGK	251570	Alistipes	Genus	Bacteria		Bacteroidetes	Bacteroidia	Bacteroidales	Rikenellaceae	Alistipes
SAGTFAQLISR	519860	Bacteroides	Genus	Bacteria		Bacteroidetes	Bacteroidia	Bacteroidales	Bacteroidaceae	Bacteroides
GTITATTPEK	923617	Bacteroidales	Order	Bacteria		Bacteroidetes	Bacteroidia	Bacteroidales
VSFENQK	479720	Leifsonia sp. Root112D2	Species	Bacteria		Actinobacteria	Actinobacteria	Micrococcales	Microbacteriaceae	Leifsonia	Leifsonia sp. Root112D2
LPFNDAQDGISNTFTIIPGALGK	292537	Lachnospiraceae bacterium 10-1	Species	Bacteria		Firmicutes	Clostridia	Clostridiales	Lachnospiraceae		Lachnospiraceae bacterium 10-1
TSTFLDIYAER	285347	Bacteria	Superkingdom	Bacteria
DELGSLANAFK	126790	Lachnospiraceae bacterium 28-4	Species	Bacteria		Firmicutes	Clostridia	Clostridiales	Lachnospiraceae		Lachnospiraceae bacterium 28-4
LLDEYQPLVER	36357	Lachnospiraceae bacterium 28-4	Species	Bacteria		Firmicutes	Clostridia	Clostridiales	Lachnospiraceae		Lachnospiraceae bacterium 28-4
NQTSMAGDVVEECNR	68474.3	Lachnospiraceae bacterium 28-4	Species	Bacteria		Firmicutes	Clostridia	Clostridiales	Lachnospiraceae		Lachnospiraceae bacterium 28-4
YSEFYNVGYQVTNR	196290	Lachnospiraceae bacterium 28-4	Species	Bacteria		Firmicutes	Clostridia	Clostridiales	Lachnospiraceae		Lachnospiraceae bacterium 28-4
GINRDQIER	23066	Firmicutes	Phylum	Bacteria		Firmicutes
VEGNAAVDFANIDKAPEER	818435	Blautia sp. YL58	Species	Bacteria		Firmicutes	Clostridia	Clostridiales	Lachnospiraceae	Blautia	Blautia sp. YL58
DTDKPFLMPVEDVFTITGR	40325.5	Bacteria	Superkingdom	Bacteria
KQLDEAMAGDNIGALLR	324260	Clostridiales	Order	Bacteria		Firmicutes	Clostridia	Clostridiales
QLDEAMAGDNIGALLR	185425	Clostridiales	Order	Bacteria		Firmicutes	Clostridia	Clostridiales
IGGSNYQIPVEVRPER	54810.7	Lactobacillus	Genus	Bacteria		Firmicutes	Bacilli	Lactobacillales	Lactobacillaceae	Lactobacillus
DTDMATEMVK	9.34517e+06	Bacteria	Superkingdom	Bacteria
QTIQDEVDQLLTEIDR	109058	Bacteria	Superkingdom	Bacteria
LEHTINNLDNVVENTTAAESQIR	3725000	Bacteria	Superkingdom	Bacteria
LEHTINNLDNVVENTTAAESQIRDTDMATEMVK	287397	Bacteria	Superkingdom	Bacteria
MVVQHNLR	3409300	Bacteria	Superkingdom	Bacteria
ILDLTALLER	134891	Lachnospiraceae bacterium 28-4	Species	Bacteria		Firmicutes	Clostridia	Clostridiales	Lachnospiraceae		Lachnospiraceae bacterium 28-4
LVNDVEPK	3.44963e+06	Bacteria	Superkingdom	Bacteria
IHVFDKETEQIITN	327730	Roseburia	Genus	Bacteria		Firmicutes	Clostridia	Clostridiales	Lachnospiraceae	Roseburia
KLIDGGYVGK	66668.3	Clostridiales	Order	Bacteria		Firmicutes	Clostridia	Clostridiales
LIDGGYVGK	623550	Clostridiales	Order	Bacteria		Firmicutes	Clostridia	Clostridiales
LGTTIIYVTHDQTEAMTLGTR	900943	Firmicutes	Phylum	Bacteria		Firmicutes
KVPKDEIDK	1.09348e+06	Firmicutes	Phylum	Bacteria		Firmicutes
MVAGLEDISSGELWIGDK	113932	Dorea	Genus	Bacteria		Firmicutes	Clostridia	Clostridiales	Lachnospiraceae	Dorea
VEVVAPEDNLGDVMGHVTAR	62746.7	Lactobacillus	Genus	Bacteria		Firmicutes	Bacilli	Lactobacillales	Lactobacillaceae	Lactobacillus
AGAVILEPIMK	97585	Bacteria	Superkingdom	Bacteria
LAEEDPTFK	519460	Bacteria	Superkingdom	Bacteria
AASNCAVTYENVR	376243	Clostridium sp. MD294	Species	Bacteria		Firmicutes	Clostridia	Clostridiales	Clostridiaceae	Clostridium	Clostridium sp. MD294
AQLLQQELFR	445670	Clostridium sp. MD294	Species	Bacteria		Firmicutes	Clostridia	Clostridiales	Clostridiaceae	Clostridium	Clostridium sp. MD294
DNHENYAPLAAMCK	51293	Clostridiales	Order	Bacteria		Firmicutes	Clostridia	Clostridiales
EYGGQGADVLTYTLAMEEMSK	82259.7	Clostridium sp. MD294	Species	Bacteria		Firmicutes	Clostridia	Clostridiales	Clostridiaceae	Clostridium	Clostridium sp. MD294
GMSAFVLDR	233020	Clostridiales	Order	Bacteria		Firmicutes	Clostridia	Clostridiales
IAMTALGGGR	308840	Firmicutes	Phylum	Bacteria		Firmicutes
IGAFGIPYSR	203660	Firmicutes	Phylum	Bacteria		Firmicutes
IGIGAQSVGIAQGAIDEAMK	150238	Clostridiales	Order	Bacteria		Firmicutes	Clostridia	Clostridiales
ITEIYEGTSEAMK	500657	Clostridiales	Order	Bacteria		Firmicutes	Clostridia	Clostridiales
MIISGSMK	116900	Firmicutes	Phylum	Bacteria		Firmicutes
NFAETEIKPIAK	508680	Clostridium sp. MD294	Species	Bacteria		Firmicutes	Clostridia	Clostridiales	Clostridiaceae	Clostridium	Clostridium sp. MD294
YQNTQFK	187393	Firmicutes	Phylum	Bacteria		Firmicutes
HDTVDIPSSK	1286900	Clostridiales	Order	Bacteria		Firmicutes	Clostridia	Clostridiales
YDIVDDGNFK	389003	Anaerobium acetethylicum	Species	Bacteria		Firmicutes	Clostridia	Clostridiales	Lachnospiraceae	Anaerobium	Anaerobium acetethylicum
TIPQAEALDAALSK	64318	Clostridiales	Order	Bacteria		Firmicutes	Clostridia	Clostridiales
YTIPHISTGDIFR	126660	Eubacterium plexicaudatum	Species	Bacteria		Firmicutes	Clostridia	Clostridiales	Eubacteriaceae	Eubacterium	Eubacterium plexicaudatum
MDYAIDVDVPDENIVNR	18893	Clostridiales	Order	Bacteria		Firmicutes	Clostridia	Clostridiales
IIMLGAPGAGK	539450	Bacteria	Superkingdom	Bacteria
VGEDAANATVEASVVDNGR	64132.5	Lachnospiraceae bacterium A2	Species	Bacteria		Firmicutes	Clostridia	Clostridiales	Lachnospiraceae		Lachnospiraceae bacterium A2
VSEGDIITIEK	713795	Clostridiales	Order	Bacteria		Firmicutes	Clostridia	Clostridiales
LKDEYGAEVTVITMGLPK	28409	Fusicatenibacter	Genus	Bacteria		Firmicutes	Clostridia	Clostridiales	Lachnospiraceae	Fusicatenibacter
IQIEGDSVIVER	255403	Lachnospiraceae	Family	Bacteria		Firmicutes	Clostridia	Clostridiales	Lachnospiraceae
QAIDGDTAQVGPQISEHLGIPVISYAQK	326317	Firmicutes	Phylum	Bacteria		Firmicutes
GLTVDEDTQLRK	76326	Firmicutes	Phylum	Bacteria		Firmicutes
QPVVQEISEHIK	44221	Clostridiales	Order	Bacteria		Firmicutes	Clostridia	Clostridiales
VLNQIAEQGGEAGGAAEEAAPAAEAEA	16312	Lachnospiraceae bacterium A2	Species	Bacteria		Firmicutes	Clostridia	Clostridiales	Lachnospiraceae		Lachnospiraceae bacterium A2
FLGSIQSPITNFAR	485823	Firmicutes	Phylum	Bacteria		Firmicutes
SALGALQNR	1.03407e+07	Firmicutes	Phylum	Bacteria		Firmicutes
LEHTIANLDNVAENTQAAESR	4.83313e+06	Clostridiales	Order	Bacteria		Firmicutes	Clostridia	Clostridiales
ISTTTQFNK	1.54223e+06	Bacteria	Superkingdom	Bacteria
MNELAVQGANDTNEGIDR	258153	Lachnospiraceae bacterium A2	Species	Bacteria		Firmicutes	Clostridia	Clostridiales	Lachnospiraceae		Lachnospiraceae bacterium A2
DLDMASEMVEYSK	172070	Lachnospiraceae	Family	Bacteria		Firmicutes	Clostridia	Clostridiales	Lachnospiraceae
IRDLDMASEMVEYSK	823223	Lachnospiraceae	Family	Bacteria		Firmicutes	Clostridia	Clostridiales	Lachnospiraceae
QLGVTTGAQSK	97875	Lachnospiraceae bacterium A2	Species	Bacteria		Firmicutes	Clostridia	Clostridiales	Lachnospiraceae		Lachnospiraceae bacterium A2
AGDDAAGLK	16738.5	Roseburia	Genus	Bacteria		Firmicutes	Clostridia	Clostridiales	Lachnospiraceae	Roseburia
ASTNAQDGVSLIQTAEGALNEAHSILQR	73196.5	Lachnospiraceae	Family	Bacteria		Firmicutes	Clostridia	Clostridiales	Lachnospiraceae
FVCELADADKK	48444.7	Lachnospiraceae bacterium 28-4	Species	Bacteria		Firmicutes	Clostridia	Clostridiales	Lachnospiraceae		Lachnospiraceae bacterium 28-4
IEGHEEVYEK	61603.3	Clostridiales	Order	Bacteria		Firmicutes	Clostridia	Clostridiales
MLSDYAAAHNKPQR	24450	Clostridiales	Order	Bacteria		Firmicutes	Clostridia	Clostridiales
AVEFSTLQR	20618	Firmicutes	Phylum	Bacteria		Firmicutes
TIDNDLPITDHCPGYGSAAK	485160	Clostridiales	Order	Bacteria		Firmicutes	Clostridia	Clostridiales
ANIHYLVTEYGK	221243	Clostridiales	Order	Bacteria		Firmicutes	Clostridia	Clostridiales
ILPTLHPGSVVTDTR	154980	Clostridiales	Order	Bacteria		Firmicutes	Clostridia	Clostridiales
MDYTQAYQEK	93953	Lachnospiraceae bacterium A2	Species	Bacteria		Firmicutes	Clostridia	Clostridiales	Lachnospiraceae		Lachnospiraceae bacterium A2
NSVAMFQVAPMDK	473740	Lachnospiraceae bacterium A2	Species	Bacteria		Firmicutes	Clostridia	Clostridiales	Lachnospiraceae		Lachnospiraceae bacterium A2
SFICCSSTFK	145523	Bacteria	Superkingdom	Bacteria
TDELHDINLR	43254.7	Lachnospiraceae bacterium A2	Species	Bacteria		Firmicutes	Clostridia	Clostridiales	Lachnospiraceae		Lachnospiraceae bacterium A2
EKPQQAEVVAVGPGGTVDGK	202803	Lachnospiraceae	Family	Bacteria		Firmicutes	Clostridia	Clostridiales	Lachnospiraceae
SAGNVAQLMAK	225635	Firmicutes	Phylum	Bacteria		Firmicutes
VLYSVTSVPAENAGK	83261.5	Eubacterium sp. 14-2	Species	Bacteria		Firmicutes	Clostridia	Clostridiales	Eubacteriaceae	Eubacterium	Eubacterium sp. 14-2
LFDEIAPK	1.09825e+06	Bacteria	Superkingdom	Bacteria
KVTVYDEVEK	272960	Firmicutes	Phylum	Bacteria		Firmicutes
VTVYDEVEK	540970	Firmicutes	Phylum	Bacteria		Firmicutes
EKDNFEEVTVTAK	70852	Bacteria	Superkingdom	Bacteria
VTVYDEVEKK	100616	Firmicutes	Phylum	Bacteria		Firmicutes
NQVTALLYNGK	182790	Clostridiales	Order	Bacteria		Firmicutes	Clostridia	Clostridiales
LTEYAAAR	1633600	Bacteria	Superkingdom	Bacteria
CDIALPCATQNELDLEDAK	255290	Bacteria	Superkingdom	Bacteria
NPAQPEFHQAVK	1125900	Firmicutes	Phylum	Bacteria		Firmicutes
VGADVANASVSATVLEQGR	86383	Lachnospiraceae bacterium A4	Species	Bacteria		Firmicutes	Clostridia	Clostridiales	Lachnospiraceae		Lachnospiraceae bacterium A4
MYAIIATGGK	997670	Bacteria	Superkingdom	Bacteria
AVVATSAEEANSK	81787.9	Lactobacillus	Genus	Bacteria		Firmicutes	Bacilli	Lactobacillales	Lactobacillaceae	Lactobacillus
GDMGVEIPFINVPFVQK	15526	Lactobacillus	Genus	Bacteria		Firmicutes	Bacilli	Lactobacillales	Lactobacillaceae	Lactobacillus
GLGVGEQSVIGK	449950	Lactobacillus	Genus	Bacteria		Firmicutes	Bacilli	Lactobacillales	Lactobacillaceae	Lactobacillus
IESQEGIDNIDEILK	301573	Lactobacillales	Order	Bacteria		Firmicutes	Bacilli	Lactobacillales
IVSTLGPASNDVETITK	199697	Lactobacillus	Genus	Bacteria		Firmicutes	Bacilli	Lactobacillales	Lactobacillaceae	Lactobacillus
LPGITEKDTNDIK	53515	Lactobacillus	Genus	Bacteria		Firmicutes	Bacilli	Lactobacillales	Lactobacillaceae	Lactobacillus
LQLIGTQLVK	67368.5	Lactobacillus	Genus	Bacteria		Firmicutes	Bacilli	Lactobacillales	Lactobacillaceae	Lactobacillus
TIIAATESGYTAR	213567	Lactobacillus	Genus	Bacteria		Firmicutes	Bacilli	Lactobacillales	Lactobacillaceae	Lactobacillus
GFLPASLISNR	51139.5	Bacteria	Superkingdom	Bacteria
HVDKPSDVLK	14640.6	Bacteria	Superkingdom	Bacteria
VLSVDPSDRR	18957	Lactobacillus	Genus	Bacteria		Firmicutes	Bacilli	Lactobacillales	Lactobacillaceae	Lactobacillus
ADITVITK	142313	Lachnospiraceae bacterium A2	Species	Bacteria		Firmicutes	Clostridia	Clostridiales	Lachnospiraceae		Lachnospiraceae bacterium A2
KVTLGATVEPANATNK	69198.7	Lachnospiraceae bacterium A2	Species	Bacteria		Firmicutes	Clostridia	Clostridiales	Lachnospiraceae		Lachnospiraceae bacterium A2
NAGVVTITAK	138123	Lachnospiraceae bacterium A2	Species	Bacteria		Firmicutes	Clostridia	Clostridiales	Lachnospiraceae		Lachnospiraceae bacterium A2
VTLGATVEPANATNK	110333	Lachnospiraceae bacterium A2	Species	Bacteria		Firmicutes	Clostridia	Clostridiales	Lachnospiraceae		Lachnospiraceae bacterium A2
VTLGATVEPANATNKK	31921.3	Lachnospiraceae bacterium A2	Species	Bacteria		Firmicutes	Clostridia	Clostridiales	Lachnospiraceae		Lachnospiraceae bacterium A2
LDHTINNLDNIVENTTAAESR	1.82463e+06	Lachnospiraceae bacterium 28-4	Species	Bacteria		Firmicutes	Clostridia	Clostridiales	Lachnospiraceae		Lachnospiraceae bacterium 28-4
ALEDPSSEWGDK	1.86187e+06	Firmicutes	Phylum	Bacteria		Firmicutes
SVVTGIEMFR	932597	Bacteria	Superkingdom	Bacteria
SVVTGIEMFRK	123073	Bacteria	Superkingdom	Bacteria
DTDKPFLMPIEDVFSITGR	53611	Bacteria	Superkingdom	Bacteria
KLLDEAQAGDNIGVLLR	101015	Bacteria	Superkingdom	Bacteria
LLDEAQAGDNIGVLLR	889130	Bacteria	Superkingdom	Bacteria
ANPSQVAVNQGTYNR	44199.7	Lachnospiraceae bacterium A2	Species	Bacteria		Firmicutes	Clostridia	Clostridiales	Lachnospiraceae		Lachnospiraceae bacterium A2
DITNAQDVTIDPIQK	61541	Lachnospiraceae bacterium A2	Species	Bacteria		Firmicutes	Clostridia	Clostridiales	Lachnospiraceae		Lachnospiraceae bacterium A2
EQNPPITVTSGDK	27197	Lachnospiraceae bacterium A2	Species	Bacteria		Firmicutes	Clostridia	Clostridiales	Lachnospiraceae		Lachnospiraceae bacterium A2
ITPQEINNTNILIDPIPK	34934	Lachnospiraceae bacterium A2	Species	Bacteria		Firmicutes	Clostridia	Clostridiales	Lachnospiraceae		Lachnospiraceae bacterium A2
LTIHGQGENYEGSR	94902	Lachnospiraceae bacterium A2	Species	Bacteria		Firmicutes	Clostridia	Clostridiales	Lachnospiraceae		Lachnospiraceae bacterium A2
NLDPTTTEVPEER	164405	Lachnospiraceae bacterium A2	Species	Bacteria		Firmicutes	Clostridia	Clostridiales	Lachnospiraceae		Lachnospiraceae bacterium A2
QVYTGTSIEPAVTNVR	57811	Lachnospiraceae bacterium A2	Species	Bacteria		Firmicutes	Clostridia	Clostridiales	Lachnospiraceae		Lachnospiraceae bacterium A2
SNYQTEEAGVPYEK	65033	Lachnospiraceae bacterium A2	Species	Bacteria		Firmicutes	Clostridia	Clostridiales	Lachnospiraceae		Lachnospiraceae bacterium A2
SPVGNEELGYSGSPR	151900	Lachnospiraceae bacterium A2	Species	Bacteria		Firmicutes	Clostridia	Clostridiales	Lachnospiraceae		Lachnospiraceae bacterium A2
VINPDAGPDVAAK	123650	Lachnospiraceae bacterium A2	Species	Bacteria		Firmicutes	Clostridia	Clostridiales	Lachnospiraceae		Lachnospiraceae bacterium A2
VVNQATIDTDPAIVNER	47162	Lachnospiraceae bacterium A2	Species	Bacteria		Firmicutes	Clostridia	Clostridiales	Lachnospiraceae		Lachnospiraceae bacterium A2
NLNFLVSK	992593	Lachnospiraceae	Family	Bacteria		Firmicutes	Clostridia	Clostridiales	Lachnospiraceae
DICTDCDLVIEVAPEK	305113	Lachnospiraceae	Family	Bacteria		Firmicutes	Clostridia	Clostridiales	Lachnospiraceae
TPVEVNEAAGFVVNR	1036590	Firmicutes	Phylum	Bacteria		Firmicutes
GIASEIGKTPVEVNEAAGFVVNR	20752	Lachnospiraceae bacterium A4	Species	Bacteria		Firmicutes	Clostridia	Clostridiales	Lachnospiraceae		Lachnospiraceae bacterium A4
TGAGFYDYTK	34003	Lachnospiraceae bacterium A4	Species	Bacteria		Firmicutes	Clostridia	Clostridiales	Lachnospiraceae		Lachnospiraceae bacterium A4
TGAGFYDYTKK	51906.7	Lachnospiraceae bacterium A4	Species	Bacteria		Firmicutes	Clostridia	Clostridiales	Lachnospiraceae		Lachnospiraceae bacterium A4
AFADELEENLK	149310	Firmicutes	Phylum	Bacteria		Firmicutes
VQALVEMMEANMAAAE	16750	Anaerotignum	Genus	Bacteria		Firmicutes	Clostridia	Clostridiales	Lachnospiraceae	Anaerotignum
VYSPAQYETR	126600	Firmicutes	Phylum	Bacteria		Firmicutes
LAIVDDDLAQESR	206795	Firmicutes	Phylum	Bacteria		Firmicutes
ADGFEWGFMAVPAVNAGEK	45076.3	Lachnospiraceae bacterium A2	Species	Bacteria		Firmicutes	Clostridia	Clostridiales	Lachnospiraceae		Lachnospiraceae bacterium A2
DTLFETVNSIVSGDK	107880	Lachnospiraceae bacterium A2	Species	Bacteria		Firmicutes	Clostridia	Clostridiales	Lachnospiraceae		Lachnospiraceae bacterium A2
GLLPLTDVLDMK	103235	Lachnospiraceae bacterium A2	Species	Bacteria		Firmicutes	Clostridia	Clostridiales	Lachnospiraceae		Lachnospiraceae bacterium A2
IFAESNAIQPIVGISDTLEGDNK	33292	Lachnospiraceae bacterium A2	Species	Bacteria		Firmicutes	Clostridia	Clostridiales	Lachnospiraceae		Lachnospiraceae bacterium A2
LAEYTESTTVANANDEGFTK	403355	Lachnospiraceae bacterium A2	Species	Bacteria		Firmicutes	Clostridia	Clostridiales	Lachnospiraceae		Lachnospiraceae bacterium A2
TVAEWQAAVEEVSDQLR	13199	Lachnospiraceae bacterium A2	Species	Bacteria		Firmicutes	Clostridia	Clostridiales	Lachnospiraceae		Lachnospiraceae bacterium A2
VAALESGYGADMWTK	372535	Lachnospiraceae bacterium A2	Species	Bacteria		Firmicutes	Clostridia	Clostridiales	Lachnospiraceae		Lachnospiraceae bacterium A2
AGDYPDVVHLATGR	703387	Lachnospiraceae	Family	Bacteria		Firmicutes	Clostridia	Clostridiales	Lachnospiraceae
EFVAYMYSDEAAK	178200	Lachnospiraceae bacterium A2	Species	Bacteria		Firmicutes	Clostridia	Clostridiales	Lachnospiraceae		Lachnospiraceae bacterium A2
EAGLTETLTK	478103	Lachnospiraceae bacterium A2	Species	Bacteria		Firmicutes	Clostridia	Clostridiales	Lachnospiraceae		Lachnospiraceae bacterium A2
NQQLILDNK	1287300	Bacteria	Superkingdom	Bacteria
AVIGLDVTDQR	181907	Lactobacillus	Genus	Bacteria		Firmicutes	Bacilli	Lactobacillales	Lactobacillaceae	Lactobacillus
GESTAVGDEGGFAPNLK	368705	Lactobacillus	Genus	Bacteria		Firmicutes	Bacilli	Lactobacillales	Lactobacillaceae	Lactobacillus
MGAETFHTLK	18683	Bacteria	Superkingdom	Bacteria
AAAQNTIPHSTGAAK	44076.7	Lactobacillaceae	Family	Bacteria		Firmicutes	Bacilli	Lactobacillales	Lactobacillaceae
AQAHVEAGAKK	9537.4	Bacteria	Superkingdom	Bacteria
EIPVYAEADAR	530380	Lactobacillaceae	Family	Bacteria		Firmicutes	Bacilli	Lactobacillales	Lactobacillaceae
NDGVELVLESTGFYTSPEK	135650	Lactobacillus	Genus	Bacteria		Firmicutes	Bacilli	Lactobacillales	Lactobacillaceae	Lactobacillus
TIVYGVNDDTLTPEDQIVSAASCTTNCLAPLAK	20098	Lactobacillus	Genus	Bacteria		Firmicutes	Bacilli	Lactobacillales	Lactobacillaceae	Lactobacillus
TVAWYDNEAGFTAQMIR	540600	Lactobacillus	Genus	Bacteria		Firmicutes	Bacilli	Lactobacillales	Lactobacillaceae	Lactobacillus
AIGLVVPELNGK	188173	Bacteria	Superkingdom	Bacteria
VDFNVPIKDGVIGDDNR	114870	Bacteria	Superkingdom	Bacteria
MNMNPEQTAEFVK	143900	Lactobacillaceae	Family	Bacteria		Firmicutes	Bacilli	Lactobacillales	Lactobacillaceae
VAAENCYFEDEGAFTGETSPK	53751.5	Lactobacillaceae	Family	Bacteria		Firmicutes	Bacilli	Lactobacillales	Lactobacillaceae
AVANVNDIIAK	184707	Bacteria	Superkingdom	Bacteria
GINSFYNLSEQAR	166665	Lactobacillus	Genus	Bacteria		Firmicutes	Bacilli	Lactobacillales	Lactobacillaceae	Lactobacillus
GNPTVEAEVYTEDGGFGR	187620	Lactobacillus	Genus	Bacteria		Firmicutes	Bacilli	Lactobacillales	Lactobacillaceae	Lactobacillus
IEDQLTSGVAQYK	286090	Lactobacillus	Genus	Bacteria		Firmicutes	Bacilli	Lactobacillales	Lactobacillaceae	Lactobacillus
VNQIGTLTETFEAIEMAK	175380	Bacteria	Superkingdom	Bacteria
VQLVGDDFFVTNTQYLAK	100990	Lactobacillales	Order	Bacteria		Firmicutes	Bacilli	Lactobacillales
WSTGEEFTTAEFIK	80659.5	Lactobacillus	Genus	Bacteria		Firmicutes	Bacilli	Lactobacillales	Lactobacillaceae	Lactobacillus
AQDFIYSWNR	206050	Lachnospiraceae bacterium A2	Species	Bacteria		Firmicutes	Clostridia	Clostridiales	Lachnospiraceae		Lachnospiraceae bacterium A2
EGNLIPDLATAMPEVSEDGK	176450	Lachnospiraceae bacterium A2	Species	Bacteria		Firmicutes	Clostridia	Clostridiales	Lachnospiraceae		Lachnospiraceae bacterium A2
QEDTSYYDAATTGAGNVEDAK	38078	Lachnospiraceae bacterium A2	Species	Bacteria		Firmicutes	Clostridia	Clostridiales	Lachnospiraceae		Lachnospiraceae bacterium A2
QEDTSYYDAATTGAGNVEDAKK	45661	Lachnospiraceae bacterium A2	Species	Bacteria		Firmicutes	Clostridia	Clostridiales	Lachnospiraceae		Lachnospiraceae bacterium A2
SDSAPEWAEYDALIK	122435	Lachnospiraceae bacterium A2	Species	Bacteria		Firmicutes	Clostridia	Clostridiales	Lachnospiraceae		Lachnospiraceae bacterium A2
GNAEASEFFADAAK	163440	Clostridiales	Order	Bacteria		Firmicutes	Clostridia	Clostridiales
VEGEISTSGTVK	224395	Clostridiales	Order	Bacteria		Firmicutes	Clostridia	Clostridiales
DVIVMGFDCNK	496257	Firmicutes	Phylum	Bacteria		Firmicutes
FLGGIEDMPR	159167	Bacteria	Superkingdom	Bacteria
MADAIIEGR	232260	Bacteria	Superkingdom	Bacteria
NGIYIIDLQK	475360	Bacteria	Superkingdom	Bacteria
FTNYMPEESGNWYIAK	247210	Roseburia hominis	Species	Bacteria		Firmicutes	Clostridia	Clostridiales	Lachnospiraceae	Roseburia	Roseburia hominis
IEANVGQAVK	616400	Lachnospiraceae	Family	Bacteria		Firmicutes	Clostridia	Clostridiales	Lachnospiraceae
IANLYDLALK	47365	Firmicutes	Phylum	Bacteria		Firmicutes
KIANLYDLALK	78857.3	Firmicutes	Phylum	Bacteria		Firmicutes
AYGSAYVAMNSK	273240	Firmicutes	Phylum	Bacteria		Firmicutes
ATDFNLK	474910	Bacteria	Superkingdom	Bacteria
LNGATVGAVANR	98287	Bacteria	Superkingdom	Bacteria
ALSLAIDR	93490.7	Bacteria	Superkingdom	Bacteria
KNGLDAIHDTVHEMAR	24532	Firmicutes	Phylum	Bacteria		Firmicutes
LAAEHEYGIYAK	141338	Firmicutes	Phylum	Bacteria		Firmicutes
NNPDISDEDKK	109995	Firmicutes	Phylum	Bacteria		Firmicutes
TQIEETTSEFDKEK	32349.3	Clostridiales	Order	Bacteria		Firmicutes	Clostridia	Clostridiales
GYISAYMATDMDK	225407	Bacteria	Superkingdom	Bacteria
VGAATETEMKESK	510060	Clostridiales	Order	Bacteria		Firmicutes	Clostridia	Clostridiales
AALEAGVDK	929330	Firmicutes	Phylum	Bacteria		Firmicutes
GTFNVVAVK	2.32683e+06	Bacteria	Superkingdom	Bacteria
MEAVLDDPYILITDKK	46490.5	Bacteria	Superkingdom	Bacteria
EIELEDAFENMGAQLVK	1.08647e+06	Bacteria	Superkingdom	Bacteria
VSNDGVITIEESK	2.17327e+06	Bacteria	Superkingdom	Bacteria
TMQTELDLVEGMQFDR	947547	Bacteria	Superkingdom	Bacteria
VAAISAGDEEVGNLVADAMEK	272650	Bacteria	Superkingdom	Bacteria
AIESIAAMSQK	267530	Clostridiales	Order	Bacteria		Firmicutes	Clostridia	Clostridiales
ETTMDQLGR	626605	Clostridiales	Order	Bacteria		Firmicutes	Clostridia	Clostridiales
AAVEEGIIAGGGSAYIHAAK	535217	Firmicutes	Phylum	Bacteria		Firmicutes
MEDALNSTR	150843	Clostridiales	Order	Bacteria		Firmicutes	Clostridia	Clostridiales
NLEAGANPIVLR	351880	Bacteria	Superkingdom	Bacteria
TNDVAGDGTTTATVLAQAMIK	60297.5	Bacteria	Superkingdom	Bacteria
SFGAPLITNDGVTIAK	1.78956e+06	Bacteria	Superkingdom	Bacteria
ENTIIVDGEGNK	1386000	Clostridiales	Order	Bacteria		Firmicutes	Clostridia	Clostridiales
GIELSLLQR	90837	Bacteria	Superkingdom	Bacteria
TIDNDLFGTDHCPGFASAAK	447267	Firmicutes	Phylum	Bacteria		Firmicutes
YFFYNGGNDSMDTCNK	294990	Bacteria	Superkingdom	Bacteria
IADPDADDTDYKR	119057	Firmicutes bacterium ASF500	Species	Bacteria		Firmicutes					Firmicutes bacterium ASF500
SQVGTMYATK	1.47247e+06	Clostridiales	Order	Bacteria		Firmicutes	Clostridia	Clostridiales
EQMLEAAK	117660	Bacteria	Superkingdom	Bacteria
GDTSGTGVAFTR	777150	Bacteria	Superkingdom	Bacteria
ASMPGMMDTVLNLGLNDVSVK	13313	Clostridium sp. MD294	Species	Bacteria		Firmicutes	Clostridia	Clostridiales	Clostridiaceae	Clostridium	Clostridium sp. MD294
GIYEAMGERPVTIR	120670	Clostridium sp. MD294	Species	Bacteria		Firmicutes	Clostridia	Clostridiales	Clostridiaceae	Clostridium	Clostridium sp. MD294
GLPASPGAAAGK	2813.1	Bacteria	Superkingdom	Bacteria
GMGTCCVSGCEEIR	112231	Clostridium sp. MD294	Species	Bacteria		Firmicutes	Clostridia	Clostridiales	Clostridiaceae	Clostridium	Clostridium sp. MD294
ILADYIDKNIYECDPTAR	68030.3	Firmicutes	Phylum	Bacteria		Firmicutes
MILSDSVEER	145616	Clostridium sp. MD294	Species	Bacteria		Firmicutes	Clostridia	Clostridiales	Clostridiaceae	Clostridium	Clostridium sp. MD294
TFTLGGATIK	40912.2	Clostridium sp. MD294	Species	Bacteria		Firmicutes	Clostridia	Clostridiales	Clostridiaceae	Clostridium	Clostridium sp. MD294
VYFTAEDAK	173320	Clostridiales	Order	Bacteria		Firmicutes	Clostridia	Clostridiales
ATNNYEYTYYR	157960	Eubacterium sp. 14-2	Species	Bacteria		Firmicutes	Clostridia	Clostridiales	Eubacteriaceae	Eubacterium	Eubacterium sp. 14-2
ELKENTIYDYQVR	54414.3	Eubacterium sp. 14-2	Species	Bacteria		Firmicutes	Clostridia	Clostridiales	Eubacteriaceae	Eubacterium	Eubacterium sp. 14-2
ENTIYDYQVR	167540	Eubacterium sp. 14-2	Species	Bacteria		Firmicutes	Clostridia	Clostridiales	Eubacteriaceae	Eubacterium	Eubacterium sp. 14-2
ENTPEIKNLQIEQK	8.38157e+06	Eubacterium sp. 14-2	Species	Bacteria		Firmicutes	Clostridia	Clostridiales	Eubacteriaceae	Eubacterium	Eubacterium sp. 14-2
ESNADETYDNVFYK	110560	Eubacterium sp. 14-2	Species	Bacteria		Firmicutes	Clostridia	Clostridiales	Eubacteriaceae	Eubacterium	Eubacterium sp. 14-2
GEADWNVLAGGTAYETPYSYVNK	52597	Eubacterium sp. 14-2	Species	Bacteria		Firmicutes	Clostridia	Clostridiales	Eubacteriaceae	Eubacterium	Eubacterium sp. 14-2
GTTYTTPIGYTAAEK	263420	Eubacterium sp. 14-2	Species	Bacteria		Firmicutes	Clostridia	Clostridiales	Eubacteriaceae	Eubacterium	Eubacterium sp. 14-2
IATINSAQYADK	131570	Eubacterium sp. 14-2	Species	Bacteria		Firmicutes	Clostridia	Clostridiales	Eubacteriaceae	Eubacterium	Eubacterium sp. 14-2
IGYDCYAGTDGK	83496	Eubacterium sp. 14-2	Species	Bacteria		Firmicutes	Clostridia	Clostridiales	Eubacteriaceae	Eubacterium	Eubacterium sp. 14-2
IVATYASGAATR	182805	Eubacterium sp. 14-2	Species	Bacteria		Firmicutes	Clostridia	Clostridiales	Eubacteriaceae	Eubacterium	Eubacterium sp. 14-2
MFNTPEFTYR	103940	Eubacterium sp. 14-2	Species	Bacteria		Firmicutes	Clostridia	Clostridiales	Eubacteriaceae	Eubacterium	Eubacterium sp. 14-2
NNSGYGYGDGAYALSNAK	156753	Eubacterium sp. 14-2	Species	Bacteria		Firmicutes	Clostridia	Clostridiales	Eubacteriaceae	Eubacterium	Eubacterium sp. 14-2
STSPVADYNADNK	143787	Eubacterium sp. 14-2	Species	Bacteria		Firmicutes	Clostridia	Clostridiales	Eubacteriaceae	Eubacterium	Eubacterium sp. 14-2
SYMTGTSTNYTQK	139143	Eubacterium sp. 14-2	Species	Bacteria		Firmicutes	Clostridia	Clostridiales	Eubacteriaceae	Eubacterium	Eubacterium sp. 14-2
TVSATPAINITQPSTK	183800	Eubacterium sp. 14-2	Species	Bacteria		Firmicutes	Clostridia	Clostridiales	Eubacteriaceae	Eubacterium	Eubacterium sp. 14-2
VCAYVETEDTR	92183	Eubacterium sp. 14-2	Species	Bacteria		Firmicutes	Clostridia	Clostridiales	Eubacteriaceae	Eubacterium	Eubacterium sp. 14-2
VESYTGTGIDR	52818	Eubacterium sp. 14-2	Species	Bacteria		Firmicutes	Clostridia	Clostridiales	Eubacteriaceae	Eubacterium	Eubacterium sp. 14-2
VGANTTHYDVTNR	255343	Eubacterium sp. 14-2	Species	Bacteria		Firmicutes	Clostridia	Clostridiales	Eubacteriaceae	Eubacterium	Eubacterium sp. 14-2
VSSTQLDLEVGKK	60356.3	Eubacterium sp. 14-2	Species	Bacteria		Firmicutes	Clostridia	Clostridiales	Eubacteriaceae	Eubacterium	Eubacterium sp. 14-2
YYAYVNSTDQVQK	139457	Eubacterium sp. 14-2	Species	Bacteria		Firmicutes	Clostridia	Clostridiales	Eubacteriaceae	Eubacterium	Eubacterium sp. 14-2
AVNAGGVAVSALEMAQNSMR	63886	Firmicutes	Phylum	Bacteria		Firmicutes
AAASAALLAATSTIDK	217260	Lachnospiraceae bacterium 28-4	Species	Bacteria		Firmicutes	Clostridia	Clostridiales	Lachnospiraceae		Lachnospiraceae bacterium 28-4
ALMDNSYK	35461	Lachnospiraceae	Family	Bacteria		Firmicutes	Clostridia	Clostridiales	Lachnospiraceae
ATNGEDTPSEEEINEK	23018	Lachnospiraceae	Family	Bacteria		Firmicutes	Clostridia	Clostridiales	Lachnospiraceae
GAMGNVTYGDEESTTVR	412057	Lachnospiraceae bacterium A2	Species	Bacteria		Firmicutes	Clostridia	Clostridiales	Lachnospiraceae		Lachnospiraceae bacterium A2
QVAEVGGTSYTDQAATPGK	51831.3	Lachnospiraceae bacterium A2	Species	Bacteria		Firmicutes	Clostridia	Clostridiales	Lachnospiraceae		Lachnospiraceae bacterium A2
VTVSLGNTIENTK	304370	Lachnospiraceae bacterium A2	Species	Bacteria		Firmicutes	Clostridia	Clostridiales	Lachnospiraceae		Lachnospiraceae bacterium A2
YQMIMAR	435340	Bacteria	Superkingdom	Bacteria
GDAYCGMLNASYNLK	731387	Bacteria	Superkingdom	Bacteria
IISFGPR	234170	Ascomycota	Phylum	Eukaryota	Fungi	Ascomycota
DCFPESLSVNR	1.10506e+06	Firmicutes	Phylum	Bacteria		Firmicutes
DCFPESLSVNRR	285750	Firmicutes	Phylum	Bacteria		Firmicutes
AYIAQGEVLPVATK	1233800	Clostridiales	Order	Bacteria		Firmicutes	Clostridia	Clostridiales
MNNLPQVK	889133	Lachnospiraceae	Family	Bacteria		Firmicutes	Clostridia	Clostridiales	Lachnospiraceae
YIGVPVEDLNYNQPK	1643050	Lachnospiraceae	Family	Bacteria		Firmicutes	Clostridia	Clostridiales	Lachnospiraceae
SLPYPTENPFA	86286.3	Firmicutes	Phylum	Bacteria		Firmicutes
AIVGLSDLK	487163	Firmicutes	Phylum	Bacteria		Firmicutes
TLPEEVTQGTLEGDIVPGDITFYR	49499.3	Clostridiales	Order	Bacteria		Firmicutes	Clostridia	Clostridiales
SFGSIGVFAIPEMQR	273840	Lachnospiraceae	Family	Bacteria		Firmicutes	Clostridia	Clostridiales	Lachnospiraceae
VGIVAVSR	323805	Bacteria	Superkingdom	Bacteria
DYVSEETYNK	102285	Clostridiales	Order	Bacteria		Firmicutes	Clostridia	Clostridiales
EGYTNTDPANETR	105237	Lachnospiraceae bacterium A2	Species	Bacteria		Firmicutes	Clostridia	Clostridiales	Lachnospiraceae		Lachnospiraceae bacterium A2
TFFDYFFEDER	9844.5	Clostridiales	Order	Bacteria		Firmicutes	Clostridia	Clostridiales
YDLQDMFGTGK	140647	Clostridiales	Order	Bacteria		Firmicutes	Clostridia	Clostridiales
SSLGAIQNR	687347	Bacteria	Superkingdom	Bacteria
ANLAIQGLK	33258	Bacteroides reticulotermitis	Species	Bacteria		Bacteroidetes	Bacteroidia	Bacteroidales	Bacteroidaceae	Bacteroides	Bacteroides reticulotermitis
IEDVITPGMK	616655	Lachnospiraceae bacterium 28-4	Species	Bacteria		Firmicutes	Clostridia	Clostridiales	Lachnospiraceae		Lachnospiraceae bacterium 28-4
LAEYTEPTTVANANNESFTK	1.75707e+06	Lachnospiraceae bacterium 28-4	Species	Bacteria		Firmicutes	Clostridia	Clostridiales	Lachnospiraceae		Lachnospiraceae bacterium 28-4
GTTCQYGLYDTFDLSQK	224530	Eubacterium sp. 14-2	Species	Bacteria		Firmicutes	Clostridia	Clostridiales	Eubacteriaceae	Eubacterium	Eubacterium sp. 14-2
LEDGELAIDKDSCNNCGR	30869.7	Eubacterium sp. 14-2	Species	Bacteria		Firmicutes	Clostridia	Clostridiales	Eubacteriaceae	Eubacterium	Eubacterium sp. 14-2
QLLANDILER	351355	Clostridiales	Order	Bacteria		Firmicutes	Clostridia	Clostridiales
AGLETGGTGSLVRPVVSCK	247203	Clostridiales	Order	Bacteria		Firmicutes	Clostridia	Clostridiales
GIHFDNIEPFR	401463	Firmicutes	Phylum	Bacteria		Firmicutes
IFTTEEELLDTVEK	445153	Clostridiales	Order	Bacteria		Firmicutes	Clostridia	Clostridiales
GLGFLNNK	323530	Firmicutes	Phylum	Bacteria		Firmicutes
IGFEEVEK	585060	Firmicutes	Phylum	Bacteria		Firmicutes
EYTFLVHPEANK	270923	Shuttleworthia	Genus	Bacteria		Firmicutes	Clostridia	Clostridiales	Lachnospiraceae	Shuttleworthia
NECNIGDTVK	96390	Bacteria	Superkingdom	Bacteria
AVEPDEEEGKVLGAYDK	613310	Lachnospiraceae bacterium 28-4	Species	Bacteria		Firmicutes	Clostridia	Clostridiales	Lachnospiraceae		Lachnospiraceae bacterium 28-4
IFIPYAPYTGE	98070.3	Lachnospiraceae bacterium 28-4	Species	Bacteria		Firmicutes	Clostridia	Clostridiales	Lachnospiraceae		Lachnospiraceae bacterium 28-4
QDAEGMANGIAYLAK	29559	Firmicutes	Phylum	Bacteria		Firmicutes
ASAAGIPVIFFNR	536177	Firmicutes	Phylum	Bacteria		Firmicutes
CAFVGTDAPEAGHMQGK	706437	Firmicutes	Phylum	Bacteria		Firmicutes
LEHTQNNLSVMAENIQDAESTIR	488330	Firmicutes bacterium ASF500	Species	Bacteria		Firmicutes					Firmicutes bacterium ASF500
DTDVAEEMMSYVK	884930	Firmicutes bacterium ASF500	Species	Bacteria		Firmicutes					Firmicutes bacterium ASF500
MDYLATQSANGTYDNEVDR	96632	Oscillibacter sp. 1-3	Species	Bacteria		Firmicutes	Clostridia	Clostridiales	Oscillospiraceae	Oscillibacter	Oscillibacter sp. 1-3
IQHNIMAMNAYR	2.00747e+06	Firmicutes	Phylum	Bacteria		Firmicutes
AQITGLNAAQK	3.65537e+06	Firmicutes	Phylum	Bacteria		Firmicutes
GDLGAVQNR	4.35567e+06	Bacteria	Superkingdom	Bacteria
AAADYFGMPLYR	334483	Alistipes	Genus	Bacteria		Bacteroidetes	Bacteroidia	Bacteroidales	Rikenellaceae	Alistipes
IEEELGDEAIYGYTK	161054	Bacteria	Superkingdom	Bacteria
MGAEVFHNLKK	51046.3	Bacteria	Superkingdom	Bacteria
SGETEDSTIADIAVATNSGQIK	355687	Bacteria	Superkingdom	Bacteria
VNQIGSLTETLDAIEMAHR	191280	Bacteria	Superkingdom	Bacteria
KIEDISGFTHGIGWCAPQQGACK	28653.5	Bacteria	Superkingdom	Bacteria
EELIGVNAGIVK	308235	Bacteria	Superkingdom	Bacteria
GFVDPESFTQTYDEYIAK	185370	Firmicutes	Phylum	Bacteria		Firmicutes
TLVADVSSCFLSEPVDVSK	161835	Clostridiales	Order	Bacteria		Firmicutes	Clostridia	Clostridiales
ASIYNAMPIEGVEK	369035	Bacteria	Superkingdom	Bacteria
LFDEYGPR	21610	Clostridiales	Order	Bacteria		Firmicutes	Clostridia	Clostridiales
GSALGALNGEPEWEAK	233125	Amoebophilaceae	Family	Bacteria		Bacteroidetes	Cytophagia	Cytophagales	Amoebophilaceae
VGDEVQIMGLGADMK	1.20043e+06	Bacteroidales	Order	Bacteria		Bacteroidetes	Bacteroidia	Bacteroidales
TVGSGQITEILE	49636	Prevotella	Genus	Bacteria		Bacteroidetes	Bacteroidia	Bacteroidales	Prevotellaceae	Prevotella
ADGQHVLAGNILVR	34060.3	Firmicutes	Phylum	Bacteria		Firmicutes
ELLSEYEFPGDDIPVIQGSALK	381503	Bacteria	Superkingdom	Bacteria
VLELMSAVDEYVPDPQR	31955	Lachnospiraceae bacterium 28-4	Species	Bacteria		Firmicutes	Clostridia	Clostridiales	Lachnospiraceae		Lachnospiraceae bacterium 28-4
KTVVTGIEMFR	338480	Bacteria	Superkingdom	Bacteria
KMLDEAQAGDNIGALLR	456130	Clostridia	Class	Bacteria		Firmicutes	Clostridia
MLDEAQAGDNIGALLR	2.61384e+06	Clostridia	Class	Bacteria		Firmicutes	Clostridia
TAPLVYQAR	46810.5	Clostridiales	Order	Bacteria		Firmicutes	Clostridia	Clostridiales
TDDEGHFIWPGFGDNLR	59247	Flavonifractor plautii	Species	Bacteria		Firmicutes	Clostridia	Clostridiales	Ruminococcaceae	Flavonifractor	Flavonifractor plautii
ADIDPENR	23002	Clostridiales	Order	Bacteria		Firmicutes	Clostridia	Clostridiales
LWAMNPEYGFFGVAPGTNVK	48566	Clostridiales	Order	Bacteria		Firmicutes	Clostridia	Clostridiales
TNLAMLIPPEAYR	4262.3	Bacteria	Superkingdom	Bacteria
VWCVGDDIAWIR	232967	Clostridium	Genus	Bacteria		Firmicutes	Clostridia	Clostridiales	Clostridiaceae	Clostridium
IADSANFNGIK	3047400	Firmicutes	Phylum	Bacteria		Firmicutes
MAAEAGANADK	257540	Prevotella	Genus	Bacteria		Bacteroidetes	Bacteroidia	Bacteroidales	Prevotellaceae	Prevotella
EGYPEIAEAFKR	121433	Bacteria	Superkingdom	Bacteria
QADREGYPEIAEAFKR	100067	Bacteria	Superkingdom	Bacteria
FAELLGDMVWDTK	113765	Bacteroidales	Order	Bacteria		Bacteroidetes	Bacteroidia	Bacteroidales
AASVDEINTFAK	1022000	Lachnospiraceae bacterium 28-4	Species	Bacteria		Firmicutes	Clostridia	Clostridiales	Lachnospiraceae		Lachnospiraceae bacterium 28-4
DYMVNDLGNAAPFTTFGDDEKPSDPLAK	28576	Lachnospiraceae bacterium 28-4	Species	Bacteria		Firmicutes	Clostridia	Clostridiales	Lachnospiraceae		Lachnospiraceae bacterium 28-4
ATLDFVNWMISSDAGK	58293.3	Lachnospiraceae	Family	Bacteria		Firmicutes	Clostridia	Clostridiales	Lachnospiraceae
NIWDLYINNSTCAPGLLGSK	13014	Lachnospiraceae bacterium 28-4	Species	Bacteria		Firmicutes	Clostridia	Clostridiales	Lachnospiraceae		Lachnospiraceae bacterium 28-4
VVTAASGTYEEVLR	765373	Lachnospiraceae bacterium 28-4	Species	Bacteria		Firmicutes	Clostridia	Clostridiales	Lachnospiraceae		Lachnospiraceae bacterium 28-4
GDMGVEIPAQNVPIVQK	77820.3	Lactobacillus reuteri	Species	Bacteria		Firmicutes	Bacilli	Lactobacillales	Lactobacillaceae	Lactobacillus	Lactobacillus reuteri
IVSTLGPASTDVDTIVK	100120	Lactobacillaceae	Family	Bacteria		Firmicutes	Bacilli	Lactobacillales	Lactobacillaceae
NTDTMFDLAAK	85247.3	Lactobacillus reuteri	Species	Bacteria		Firmicutes	Bacilli	Lactobacillales	Lactobacillaceae	Lactobacillus	Lactobacillus reuteri
EIIQAQHEK	58472.7	Lactobacillus reuteri	Species	Bacteria		Firmicutes	Bacilli	Lactobacillales	Lactobacillaceae	Lactobacillus	Lactobacillus reuteri
IVEIEPSENR	180693	Bacteria	Superkingdom	Bacteria
NPQTGEEINIPASK	163500	Lactobacillus reuteri	Species	Bacteria		Firmicutes	Bacilli	Lactobacillales	Lactobacillaceae	Lactobacillus	Lactobacillus reuteri
ALQALKDYGVDTTGVVYCGGQGGDQGTR	69439	Lachnospiraceae bacterium 28-4	Species	Bacteria		Firmicutes	Clostridia	Clostridiales	Lachnospiraceae		Lachnospiraceae bacterium 28-4
DYGVDTTGVVYCGGQGGDQGTR	262413	Lachnospiraceae bacterium 28-4	Species	Bacteria		Firmicutes	Clostridia	Clostridiales	Lachnospiraceae		Lachnospiraceae bacterium 28-4
ELFEAADAMQYINDDR	161873	Lachnospiraceae bacterium 28-4	Species	Bacteria		Firmicutes	Clostridia	Clostridiales	Lachnospiraceae		Lachnospiraceae bacterium 28-4
MAMYASFQK	153710	Lachnospiraceae bacterium 28-4	Species	Bacteria		Firmicutes	Clostridia	Clostridiales	Lachnospiraceae		Lachnospiraceae bacterium 28-4
SESGAYYEYPLCMTTHTMAVNK	67766.7	Lachnospiraceae bacterium 28-4	Species	Bacteria		Firmicutes	Clostridia	Clostridiales	Lachnospiraceae		Lachnospiraceae bacterium 28-4
SSYGNIYAGTEDEER	640810	Lachnospiraceae bacterium 28-4	Species	Bacteria		Firmicutes	Clostridia	Clostridiales	Lachnospiraceae		Lachnospiraceae bacterium 28-4
TWTTENFEK	301945	Lachnospiraceae bacterium 28-4	Species	Bacteria		Firmicutes	Clostridia	Clostridiales	Lachnospiraceae		Lachnospiraceae bacterium 28-4
IQGGPDVGSVR	210720	Lachnospiraceae bacterium 28-4	Species	Bacteria		Firmicutes	Clostridia	Clostridiales	Lachnospiraceae		Lachnospiraceae bacterium 28-4
KLTLENVMEEAK	24639.7	Lachnospiraceae bacterium 28-4	Species	Bacteria		Firmicutes	Clostridia	Clostridiales	Lachnospiraceae		Lachnospiraceae bacterium 28-4
IQTGSYTNQEGQK	110063	Lachnospiraceae	Family	Bacteria		Firmicutes	Clostridia	Clostridiales	Lachnospiraceae
YTLAVDRR	284143	Firmicutes	Phylum	Bacteria		Firmicutes
LTRDPEVR	367853	Bacteria	Superkingdom	Bacteria
YSQGENATAIAR	187037	Lachnospiraceae bacterium A2	Species	Bacteria		Firmicutes	Clostridia	Clostridiales	Lachnospiraceae		Lachnospiraceae bacterium A2
ADINTIR	57192.7	Bacteria	Superkingdom	Bacteria
SLNLQASFNYER	252950	Clostridiales	Order	Bacteria		Firmicutes	Clostridia	Clostridiales
TQYNNLTPAQPLDKK	637867	Lachnospiraceae bacterium 28-4	Species	Bacteria		Firmicutes	Clostridia	Clostridiales	Lachnospiraceae		Lachnospiraceae bacterium 28-4
DLWNMVLDLQK	1404.1	Lachnospiraceae bacterium 28-4	Species	Bacteria		Firmicutes	Clostridia	Clostridiales	Lachnospiraceae		Lachnospiraceae bacterium 28-4
EAIQATYFGYLCAVK	107595	Lachnospiraceae bacterium 28-4	Species	Bacteria		Firmicutes	Clostridia	Clostridiales	Lachnospiraceae		Lachnospiraceae bacterium 28-4
EMAASYGCDISKPATNVK	323383	Lachnospiraceae bacterium 28-4	Species	Bacteria		Firmicutes	Clostridia	Clostridiales	Lachnospiraceae		Lachnospiraceae bacterium 28-4
NYHPYEGDEAFLAAPTQNTK	146367	Lachnospiraceae bacterium 28-4	Species	Bacteria		Firmicutes	Clostridia	Clostridiales	Lachnospiraceae		Lachnospiraceae bacterium 28-4
YGNDDDRVDEIAQEVVHR	208823	Lachnospiraceae bacterium 28-4	Species	Bacteria		Firmicutes	Clostridia	Clostridiales	Lachnospiraceae		Lachnospiraceae bacterium 28-4
LREEISEQIVALK	152263	Clostridiales	Order	Bacteria		Firmicutes	Clostridia	Clostridiales
ETIVGFQTDAPFKR	110284	Lachnospiraceae	Family	Bacteria		Firmicutes	Clostridia	Clostridiales	Lachnospiraceae
SKETIVGFQTDAPFK	27681.5	Lachnospiraceae	Family	Bacteria		Firmicutes	Clostridia	Clostridiales	Lachnospiraceae
DFVGGKWENEVNVR	117620	Lachnospiraceae	Family	Bacteria		Firmicutes	Clostridia	Clostridiales	Lachnospiraceae
VALYGIDYLIQDK	400643	Lachnospiraceae bacterium 28-4	Species	Bacteria		Firmicutes	Clostridia	Clostridiales	Lachnospiraceae		Lachnospiraceae bacterium 28-4
HLALMPYVQE	209603	Lachnospiraceae bacterium 28-4	Species	Bacteria		Firmicutes	Clostridia	Clostridiales	Lachnospiraceae		Lachnospiraceae bacterium 28-4
DNVIDYKDVNK	576280	Firmicutes	Phylum	Bacteria		Firmicutes
TEGDALDLIDATGYTYPK	89463.3	Lactobacillus	Genus	Bacteria		Firmicutes	Bacilli	Lactobacillales	Lactobacillaceae	Lactobacillus
VLGSGTSLDTAR	17768	Lactobacillus	Genus	Bacteria		Firmicutes	Bacilli	Lactobacillales	Lactobacillaceae	Lactobacillus
FAELLGEVLTDSTK	597547	Bacteria	Superkingdom	Bacteria
FAELLGEVLTDSTKK	1592000	Bacteria	Superkingdom	Bacteria
IASENATFAQPETGLGIIPGFGGTQR	66169.6	Lachnospiraceae bacterium A2	Species	Bacteria		Firmicutes	Clostridia	Clostridiales	Lachnospiraceae		Lachnospiraceae bacterium A2
MFTGTVTDPADR	119877	Prevotella	Genus	Bacteria		Bacteroidetes	Bacteroidia	Bacteroidales	Prevotellaceae	Prevotella
LNQLAVK	167070	Bacteria	Superkingdom	Bacteria
YVNFDPVECMNYK	88833.3	Lachnospiraceae	Family	Bacteria		Firmicutes	Clostridia	Clostridiales	Lachnospiraceae
DFAYEAGSK	86739	Lachnospiraceae	Family	Bacteria		Firmicutes	Clostridia	Clostridiales	Lachnospiraceae
GIENPNLK	200107	Lachnospiraceae bacterium MD335	Species	Bacteria		Firmicutes	Clostridia	Clostridiales	Lachnospiraceae		Lachnospiraceae bacterium MD335
VPFGQDEPMNK	461830	Lachnospiraceae bacterium A4	Species	Bacteria		Firmicutes	Clostridia	Clostridiales	Lachnospiraceae		Lachnospiraceae bacterium A4
FLDAQSLIGFMK	20305	Lachnospiraceae	Family	Bacteria		Firmicutes	Clostridia	Clostridiales	Lachnospiraceae
EIEFVDFTGK	85707.5	Lachnospiraceae bacterium M18-1	Species	Bacteria		Firmicutes	Clostridia	Clostridiales	Lachnospiraceae		Lachnospiraceae bacterium M18-1
TELVAAMAEHADMTKK	250167	Lachnospiraceae bacterium A4	Species	Bacteria		Firmicutes	Clostridia	Clostridiales	Lachnospiraceae		Lachnospiraceae bacterium A4
ALTAFTEVVAK	331939	Lachnospiraceae bacterium A4	Species	Bacteria		Firmicutes	Clostridia	Clostridiales	Lachnospiraceae		Lachnospiraceae bacterium A4
ADFVACHNPSYVTK	405007	Bacteria	Superkingdom	Bacteria
ALNPEHPTMR	56721	Firmicutes	Phylum	Bacteria		Firmicutes
LGTNYQLFNYYGAPDADR	277415	Bacteria	Superkingdom	Bacteria
ANFEGECSEVGMYLAMAR	333858	Bacteria	Superkingdom	Bacteria
AFEGLLNR	323313	Firmicutes	Phylum	Bacteria		Firmicutes
AAYEEAEHAAK	1.25023e+07	Bacteria	Superkingdom	Bacteria
AKELGLDAIHDTVHEMAR	119035	Bacteria	Superkingdom	Bacteria
ELGLDAIHDTVHEMAR	1.3597e+06	Bacteria	Superkingdom	Bacteria
EGYPEVGMYYEK	255250	Clostridiales	Order	Bacteria		Firmicutes	Clostridia	Clostridiales
VAIADILVNEGYIAK	71246.7	Lachnospiraceae	Family	Bacteria		Firmicutes	Clostridia	Clostridiales	Lachnospiraceae
YDIVEDGSFNTIR	149310	Lachnospiraceae	Family	Bacteria		Firmicutes	Clostridia	Clostridiales	Lachnospiraceae
IQVFEGTVIAK	182210	Firmicutes	Phylum	Bacteria		Firmicutes
ISYGVGVEK	98240	Bacteria	Superkingdom	Bacteria
AELDMFTTPK	237345	Lachnospiraceae bacterium A2	Species	Bacteria		Firmicutes	Clostridia	Clostridiales	Lachnospiraceae		Lachnospiraceae bacterium A2
AVDGANCYDIGTYK	231960	Lachnospiraceae bacterium A2	Species	Bacteria		Firmicutes	Clostridia	Clostridiales	Lachnospiraceae		Lachnospiraceae bacterium A2
DYTVYVSR	120782	Lachnospiraceae bacterium A2	Species	Bacteria		Firmicutes	Clostridia	Clostridiales	Lachnospiraceae		Lachnospiraceae bacterium A2
GSSSPTNTVALEWNPAIGSPTK	170000	Lachnospiraceae bacterium A2	Species	Bacteria		Firmicutes	Clostridia	Clostridiales	Lachnospiraceae		Lachnospiraceae bacterium A2
GYTPSANPSVVIPELAAGK	168743	Lachnospiraceae bacterium A2	Species	Bacteria		Firmicutes	Clostridia	Clostridiales	Lachnospiraceae		Lachnospiraceae bacterium A2
SASGYIASGNTSTK	263267	Lachnospiraceae bacterium A2	Species	Bacteria		Firmicutes	Clostridia	Clostridiales	Lachnospiraceae		Lachnospiraceae bacterium A2
TYGSWSDSIWFAK	77583	Lachnospiraceae bacterium A2	Species	Bacteria		Firmicutes	Clostridia	Clostridiales	Lachnospiraceae		Lachnospiraceae bacterium A2
VAAMDSAGTTGTPSAPFEVVTAPVGK	404917	Lachnospiraceae bacterium A2	Species	Bacteria		Firmicutes	Clostridia	Clostridiales	Lachnospiraceae		Lachnospiraceae bacterium A2
YGTTPTEYK	384367	Lachnospiraceae bacterium A2	Species	Bacteria		Firmicutes	Clostridia	Clostridiales	Lachnospiraceae		Lachnospiraceae bacterium A2
DLLSEYDFPGDDVPVVR	219350	Lactobacillaceae	Family	Bacteria		Firmicutes	Bacilli	Lactobacillales	Lactobacillaceae
EGGHTVGAGVVSDILD	225280	Lactobacillus	Genus	Bacteria		Firmicutes	Bacilli	Lactobacillales	Lactobacillaceae	Lactobacillus
GQVLAEPGSIQTHK	58705.7	Lactobacillaceae	Family	Bacteria		Firmicutes	Bacilli	Lactobacillales	Lactobacillaceae
VGDEVEIVGLTEDVLK	94855	Lactobacillus	Genus	Bacteria		Firmicutes	Bacilli	Lactobacillales	Lactobacillaceae	Lactobacillus
STVTGLEMFHK	299580	Lactobacillus	Genus	Bacteria		Firmicutes	Bacilli	Lactobacillales	Lactobacillaceae	Lactobacillus
TLDLGEAGDNVGVLLR	222323	Lactobacillales	Order	Bacteria		Firmicutes	Bacilli	Lactobacillales
IGATADDIAAIGITNQR	117350	Lachnospiraceae bacterium A2	Species	Bacteria		Firmicutes	Clostridia	Clostridiales	Lachnospiraceae		Lachnospiraceae bacterium A2
IIDSAPDSEYMAK	20602	Clostridiales	Order	Bacteria		Firmicutes	Clostridia	Clostridiales
TMLFNITELK	50062	Lachnospiraceae bacterium A2	Species	Bacteria		Firmicutes	Clostridia	Clostridiales	Lachnospiraceae		Lachnospiraceae bacterium A2
TSEYCDSLKEK	60914.3	Firmicutes	Phylum	Bacteria		Firmicutes
ADSGIELSALK	409750	Clostridiales	Order	Bacteria		Firmicutes	Clostridia	Clostridiales
GAAHVTDYSNAAR	719897	Clostridiales	Order	Bacteria		Firmicutes	Clostridia	Clostridiales
NWAIDQTFKPQISAEER	185290	Clostridiales	Order	Bacteria		Firmicutes	Clostridia	Clostridiales
CILFNEKGEMCSVAQK	67922	Firmicutes	Phylum	Bacteria		Firmicutes
EFTQYFPK	141850	Firmicutes	Phylum	Bacteria		Firmicutes
GEMCSVAQK	161163	Firmicutes	Phylum	Bacteria		Firmicutes
TSEYCDSLK	161560	Bacteria	Superkingdom	Bacteria
WILDNVEGVR	231047	Bacteria	Superkingdom	Bacteria
YVMALDAGTTSNR	345000	Bacteria	Superkingdom	Bacteria
AVAEAADNLNIK	178550	Lactobacillus	Genus	Bacteria		Firmicutes	Bacilli	Lactobacillales	Lactobacillaceae	Lactobacillus
AVITATQMLDSMQENPRPTR	78017.5	Lactobacillus	Genus	Bacteria		Firmicutes	Bacilli	Lactobacillales	Lactobacillaceae	Lactobacillus
AVVATSAAEANEK	205870	Lactobacillaceae	Family	Bacteria		Firmicutes	Bacilli	Lactobacillales	Lactobacillaceae
GDMGVEIPAENVPLVQK	156137	Bacteria	Superkingdom	Bacteria
IESQEGIDNFDEILK	152287	Lactobacillales	Order	Bacteria		Firmicutes	Bacilli	Lactobacillales
IVSTLGPASSDLDTICK	58353	Lactobacillus	Genus	Bacteria		Firmicutes	Bacilli	Lactobacillales	Lactobacillaceae	Lactobacillus
LVEGQGVGDETVIGK	124860	Lactobacillus	Genus	Bacteria		Firmicutes	Bacilli	Lactobacillales	Lactobacillaceae	Lactobacillus
GTLDTQGVSGR	53406	Bacteria	Superkingdom	Bacteria
NKETDLPSPQKR	109497	Firmicutes	Phylum	Bacteria		Firmicutes
GDAAQGEETTLTEEEYEAK	15148	Lachnospiraceae bacterium 28-4	Species	Bacteria		Firmicutes	Clostridia	Clostridiales	Lachnospiraceae		Lachnospiraceae bacterium 28-4
LNSAMTDASSIDPNDVEAAK	123477	Lachnospiraceae bacterium 28-4	Species	Bacteria		Firmicutes	Clostridia	Clostridiales	Lachnospiraceae		Lachnospiraceae bacterium 28-4
DILMPQLNELK	257990	Lachnospiraceae bacterium A2	Species	Bacteria		Firmicutes	Clostridia	Clostridiales	Lachnospiraceae		Lachnospiraceae bacterium A2
LLEDKNLEQLFGK	63842	Lachnospiraceae bacterium A2	Species	Bacteria		Firmicutes	Clostridia	Clostridiales	Lachnospiraceae		Lachnospiraceae bacterium A2
ENYFSLLDHLGSGR	130743	Clostridiales	Order	Bacteria		Firmicutes	Clostridia	Clostridiales
VEEGAEVEDAVVMGNSIIK	176770	Lachnospiraceae	Family	Bacteria		Firmicutes	Clostridia	Clostridiales	Lachnospiraceae
ITEFQEKPKEPK	66484.5	Clostridiales	Order	Bacteria		Firmicutes	Clostridia	Clostridiales
YDPEYVIILSGDQICK	188270	Clostridiales	Order	Bacteria		Firmicutes	Clostridia	Clostridiales
ILAVAQVNPDTR	94236	Lachnospiraceae bacterium 28-4	Species	Bacteria		Firmicutes	Clostridia	Clostridiales	Lachnospiraceae		Lachnospiraceae bacterium 28-4
VRELTDEEVKR	66455	Lachnospiraceae bacterium 28-4	Species	Bacteria		Firmicutes	Clostridia	Clostridiales	Lachnospiraceae		Lachnospiraceae bacterium 28-4
AGDVIELR	412467	Bacteria	Superkingdom	Bacteria
GMTGENLMVMLER	93741.3	Firmicutes	Phylum	Bacteria		Firmicutes
LTPEWMDVDHEAMK	78606.3	Lachnospiraceae bacterium 28-4	Species	Bacteria		Firmicutes	Clostridia	Clostridiales	Lachnospiraceae		Lachnospiraceae bacterium 28-4
IVPYANPFR	2.35403e+06	Clostridiales	Order	Bacteria		Firmicutes	Clostridia	Clostridiales
EGYDKLPDEALAALK	478240	Lachnospiraceae	Family	Bacteria		Firmicutes	Clostridia	Clostridiales	Lachnospiraceae
EGYDKLPDEALAALKK	1320900	Lachnospiraceae	Family	Bacteria		Firmicutes	Clostridia	Clostridiales	Lachnospiraceae
KEGYDKLPDEALAALK	29672	Lachnospiraceae	Family	Bacteria		Firmicutes	Clostridia	Clostridiales	Lachnospiraceae
LPDEALAALK	145523	Clostridiales	Order	Bacteria		Firmicutes	Clostridia	Clostridiales
LPDEALAALKK	228710	Clostridiales	Order	Bacteria		Firmicutes	Clostridia	Clostridiales
FVASVYGLSGSGK	2.58597e+06	Lachnospiraceae	Family	Bacteria		Firmicutes	Clostridia	Clostridiales	Lachnospiraceae
VLLFNDGAVTGR	3032050	Bacteria	Superkingdom	Bacteria
GTLTMAWALANR	50994	Lachnospiraceae	Family	Bacteria		Firmicutes	Clostridia	Clostridiales	Lachnospiraceae
KGTLTMAWALANR	8140.5	Lachnospiraceae	Family	Bacteria		Firmicutes	Clostridia	Clostridiales	Lachnospiraceae
AYYPISEIGAGK	3.33663e+06	Clostridiales	Order	Bacteria		Firmicutes	Clostridia	Clostridiales
TYPLVNDYEK	3.75633e+06	Clostridiales	Order	Bacteria		Firmicutes	Clostridia	Clostridiales
VDAVEGFATK	2224800	Lachnospiraceae	Family	Bacteria		Firmicutes	Clostridia	Clostridiales	Lachnospiraceae
VDAVEGFATKK	306387	Lachnospiraceae	Family	Bacteria		Firmicutes	Clostridia	Clostridiales	Lachnospiraceae
LDKVVMDAVYETR	432847	Clostridiales	Order	Bacteria		Firmicutes	Clostridia	Clostridiales
VVMDAVYETR	3.68527e+06	Clostridiales	Order	Bacteria		Firmicutes	Clostridia	Clostridiales
VAAGTDLNALR	3.48227e+06	Clostridiales	Order	Bacteria		Firmicutes	Clostridia	Clostridiales
DGETFGLEK	299100	Lachnospiraceae	Family	Bacteria		Firmicutes	Clostridia	Clostridiales	Lachnospiraceae
IKDGETFGLEK	1.1409e+06	Lachnospiraceae	Family	Bacteria		Firmicutes	Clostridia	Clostridiales	Lachnospiraceae
EYSLEGGKK	1.51726e+06	Lachnospiraceae	Family	Bacteria		Firmicutes	Clostridia	Clostridiales	Lachnospiraceae
TMYHAECFVGLDPEFMVK	40999.5	Lachnospiraceae	Family	Bacteria		Firmicutes	Clostridia	Clostridiales	Lachnospiraceae
DVACYIVNTGDFMGTK	366300	Lachnospiraceae bacterium A4	Species	Bacteria		Firmicutes	Clostridia	Clostridiales	Lachnospiraceae		Lachnospiraceae bacterium A4
LVEEKDVACYIVNTGDFMGTK	368800	Lachnospiraceae bacterium A4	Species	Bacteria		Firmicutes	Clostridia	Clostridiales	Lachnospiraceae		Lachnospiraceae bacterium A4
TSDAFKPDMNNAEYVAALK	792163	Lachnospiraceae bacterium A4	Species	Bacteria		Firmicutes	Clostridia	Clostridiales	Lachnospiraceae		Lachnospiraceae bacterium A4
SAMQNRVDAVEGFATK	62948	Lachnospiraceae bacterium A4	Species	Bacteria		Firmicutes	Clostridia	Clostridiales	Lachnospiraceae		Lachnospiraceae bacterium A4
GSALASVMGATLATK	558290	Clostridiales	Order	Bacteria		Firmicutes	Clostridia	Clostridiales
ATDKPFLMPVEDVFTITGR	28031	Bacteria	Superkingdom	Bacteria
VEGNTATDFENIDKAPEER	297937	Coprococcus	Genus	Bacteria		Firmicutes	Clostridia	Clostridiales	Lachnospiraceae	Coprococcus
GQTGQQLLLGAYSSLNR	58795.3	Prevotella	Genus	Bacteria		Bacteroidetes	Bacteroidia	Bacteroidales	Prevotellaceae	Prevotella
IPEGPIAEK	129240	Bacteria	Superkingdom	Bacteria
GLFAIGECNFSDHGANR	265227	Bacteria	Superkingdom	Bacteria
MMAIDALNR	346737	Prevotella	Genus	Bacteria		Bacteroidetes	Bacteroidia	Bacteroidales	Prevotellaceae	Prevotella
EYGGLLANR	672027	Bacteria	Superkingdom	Bacteria
NLVTGEIER	339638	Bacteria	Superkingdom	Bacteria
MEALIPVLK	56725.3	Enterocloster asparagiformis	Species	Bacteria		Firmicutes	Clostridia	Clostridiales	Lachnospiraceae	Enterocloster	Enterocloster asparagiformis
LYWTAEEVDAK	123810	Bacteria	Superkingdom	Bacteria
NIYASSVEVAER	544887	Firmicutes	Phylum	Bacteria		Firmicutes
YYIEVANMPTTNDALK	224750	Firmicutes	Phylum	Bacteria		Firmicutes
GDVGAVNAAVEAGSTSASR	139003	Lachnospiraceae bacterium 28-4	Species	Bacteria		Firmicutes	Clostridia	Clostridiales	Lachnospiraceae		Lachnospiraceae bacterium 28-4
AANVTLVGTEK	388850	Firmicutes	Phylum	Bacteria		Firmicutes
GLVASIEAADAMLK	96024.3	Firmicutes	Phylum	Bacteria		Firmicutes
LGELVATHVIPR	39703.3	Ruminococcus	Genus	Bacteria		Firmicutes	Clostridia	Clostridiales	Ruminococcaceae	Ruminococcus
EVSEGAANGEVEK	157565	Lachnospiraceae bacterium 28-4	Species	Bacteria		Firmicutes	Clostridia	Clostridiales	Lachnospiraceae		Lachnospiraceae bacterium 28-4
GDADWLTGK	203223	Bacteria	Superkingdom	Bacteria
LTDNMSFSDK	17688	Lachnospiraceae bacterium 28-4	Species	Bacteria		Firmicutes	Clostridia	Clostridiales	Lachnospiraceae		Lachnospiraceae bacterium 28-4
AHIDAGAK	214215	Bacteria	Superkingdom	Bacteria
TLTAEDTIISAASCTTNCLAPMAK	224383	Clostridium	Genus	Bacteria		Firmicutes	Clostridia	Clostridiales	Clostridiaceae	Clostridium
LIGSAQR	13011000	Bacteria	Superkingdom	Bacteria
AGAANIVPNSTGAAK	5.30223e+06	Bacteria	Superkingdom	Bacteria
EGINAAMK	2.15627e+06	Bacteria	Superkingdom	Bacteria
YGSLFDATQTMVAK	1.53198e+06	Faecalibacterium prausnitzii	Species	Bacteria		Firmicutes	Clostridia	Clostridiales	Ruminococcaceae	Faecalibacterium	Faecalibacterium prausnitzii
TQFGVEDANK	314743	Clostridium	Genus	Bacteria		Firmicutes	Clostridia	Clostridiales	Clostridiaceae	Clostridium
AAIVEVNSETDFVAK	125043	Clostridiales	Order	Bacteria		Firmicutes	Clostridia	Clostridiales
FETGEGLEK	2.26927e+06	Firmicutes	Phylum	Bacteria		Firmicutes
FETGEGLEKK	145630	Firmicutes	Phylum	Bacteria		Firmicutes
AQIMNDPK	318115	Clostridiales	Order	Bacteria		Firmicutes	Clostridia	Clostridiales
ITAPVSEVLEIAGNK	35693.5	Lachnospiraceae bacterium 28-4	Species	Bacteria		Firmicutes	Clostridia	Clostridiales	Lachnospiraceae		Lachnospiraceae bacterium 28-4
IRDTDMAK	743223	Bacteria	Superkingdom	Bacteria
EMMAYTK	700215	Firmicutes	Phylum	Bacteria		Firmicutes
LDQEEFMK	94535.5	Leadbetterella byssophila	Species	Bacteria		Bacteroidetes	Cytophagia	Cytophagales	Cytophagaceae	Leadbetterella	Leadbetterella byssophila
ILTDLIGDR	1.09753e+06	Prevotella	Genus	Bacteria		Bacteroidetes	Bacteroidia	Bacteroidales	Prevotellaceae	Prevotella
GAYHGPAPIPEEGK	546827	Bacteria	Superkingdom	Bacteria
KGDDANTALEK	576000	Firmicutes	Phylum	Bacteria		Firmicutes
TQSAFSEGGLAVGASLEDLGK	158293	Prevotella	Genus	Bacteria		Bacteroidetes	Bacteroidia	Bacteroidales	Prevotellaceae	Prevotella
YLEMAEGYCTR	92473.3	Bacteria	Superkingdom	Bacteria
AFEHGITPIICCGESLTQR	423170	Clostridiales	Order	Bacteria		Firmicutes	Clostridia	Clostridiales
NNTFDIR	132660	Prevotella bryantii	Species	Bacteria		Bacteroidetes	Bacteroidia	Bacteroidales	Prevotellaceae	Prevotella	Prevotella bryantii
AFVDGAELVNQVK	126200	Clostridium sp. MD294	Species	Bacteria		Firmicutes	Clostridia	Clostridiales	Clostridiaceae	Clostridium	Clostridium sp. MD294
GGLINTEDLLAAVK	73074.7	Clostridium sp. MD294	Species	Bacteria		Firmicutes	Clostridia	Clostridiales	Clostridiaceae	Clostridium	Clostridium sp. MD294
IAFFDTKPYDK	80754.7	Bacteria	Superkingdom	Bacteria
SDVITLHCPLFPETK	48369	Clostridium sp. MD294	Species	Bacteria		Firmicutes	Clostridia	Clostridiales	Clostridiaceae	Clostridium	Clostridium sp. MD294
HMTVSAFEGIDKK	151677	Firmicutes	Phylum	Bacteria		Firmicutes
SAGTAAQLMAK	315500	Bacteria	Superkingdom	Bacteria
ATIGQVGNTDHANIQIGK	59286	Ruminococcaceae bacterium D16	Species	Bacteria		Firmicutes	Clostridia	Clostridiales	Ruminococcaceae		Ruminococcaceae bacterium D16
DAASTALYGSR	107870	Bacteroidetes	Phylum	Bacteria		Bacteroidetes
AAANESFGYNEDEIVSSDIVGMK	790577	Clostridiales	Order	Bacteria		Firmicutes	Clostridia	Clostridiales
GNDVTVDGINAAMK	1.03257e+06	Clostridiales	Order	Bacteria		Firmicutes	Clostridia	Clostridiales
IYAFPDANNCPWGDLK	1.21263e+06	Clostridiales	Order	Bacteria		Firmicutes	Clostridia	Clostridiales
VTAGDDSITVDGK	3.04023e+06	Lachnospiraceae bacterium A2	Species	Bacteria		Firmicutes	Clostridia	Clostridiales	Lachnospiraceae		Lachnospiraceae bacterium A2
VVISAPAGNDLPTIVFNTNHETLK	209290	Clostridiales	Order	Bacteria		Firmicutes	Clostridia	Clostridiales
YAAIQSGIMCTIHAYTGDQMTLDGPQR	22644	Clostridiales	Order	Bacteria		Firmicutes	Clostridia	Clostridiales
YALADKVTAGDDSITVDGK	298273	Lachnospiraceae bacterium A2	Species	Bacteria		Firmicutes	Clostridia	Clostridiales	Lachnospiraceae		Lachnospiraceae bacterium A2
AQAHINAGAR	1.87343e+06	Firmicutes	Phylum	Bacteria		Firmicutes
DKAQAHINAGAR	1.09493e+06	Clostridiales	Order	Bacteria		Firmicutes	Clostridia	Clostridiales
VDVVLECSGFYTSK	916820	Clostridiales	Order	Bacteria		Firmicutes	Clostridia	Clostridiales
AEDTIISAASCTTNCLAPMADALNK	184760	Clostridiales	Order	Bacteria		Firmicutes	Clostridia	Clostridiales
VPTPTGSTTILTAVVK	1.04077e+06	Bacteria	Superkingdom	Bacteria
FGSLFDATQTMVSK	1.85789e+06	Bacteria	Superkingdom	Bacteria
ALADTDATTIIGGGDSAAAVNQLGFGDK	30352	Clostridiales	Order	Bacteria		Firmicutes	Clostridia	Clostridiales
ELPGVAAATNK	283383	Clostridiales	Order	Bacteria		Firmicutes	Clostridia	Clostridiales
SLVDDTKVEYCK	41669.5	Lachnospiraceae bacterium A2	Species	Bacteria		Firmicutes	Clostridia	Clostridiales	Lachnospiraceae		Lachnospiraceae bacterium A2
TAAMFADAVK	50134	Clostridiales	Order	Bacteria		Firmicutes	Clostridia	Clostridiales
VSVDDINVK	323700	Clostridiales	Order	Bacteria		Firmicutes	Clostridia	Clostridiales
DGEVILLENTR	341335	Firmicutes	Phylum	Bacteria		Firmicutes
LNVISNLLEK	311393	Bacteria	Superkingdom	Bacteria
LTELLGQEVK	543130	Bacteria	Superkingdom	Bacteria
SFNQGTWDGVK	1422.6	Ruminococcus	Genus	Bacteria		Firmicutes	Clostridia	Clostridiales	Ruminococcaceae	Ruminococcus
TNNVAAAAQVGTVIAK	167750	Eubacterium plexicaudatum	Species	Bacteria		Firmicutes	Clostridia	Clostridiales	Eubacteriaceae	Eubacterium	Eubacterium plexicaudatum
GMAVAQGILTMR	167320	Bacteroidales	Order	Bacteria		Bacteroidetes	Bacteroidia	Bacteroidales
IAMDLLR	63160	Bacteria	Superkingdom	Bacteria
IETSPEDLR	985410	Bacteria	Superkingdom	Bacteria
LLDPPLHEFVPHQTATQK	801310	Bacteroidales	Order	Bacteria		Bacteroidetes	Bacteroidia	Bacteroidales
TEHMFFEGDRIK	39760.7	Bacteria	Superkingdom	Bacteria
VYTFGDGK	102759	Bacteroidales	Order	Bacteria		Bacteroidetes	Bacteroidia	Bacteroidales
AKVDSLEEFNPMLGHR	341190	Bacteroidia	Class	Bacteria		Bacteroidetes	Bacteroidia
TPQQITVEGSR	342950	Bacteroidales	Order	Bacteria		Bacteroidetes	Bacteroidia	Bacteroidales
DVTPAQFIAVYENLK	48713	Clostridium sp. MD294	Species	Bacteria		Firmicutes	Clostridia	Clostridiales	Clostridiaceae	Clostridium	Clostridium sp. MD294
FYDALPAVVEQYMK	126470	Clostridium sp. MD294	Species	Bacteria		Firmicutes	Clostridia	Clostridiales	Clostridiaceae	Clostridium	Clostridium sp. MD294
KGDTILNMNYAAVDK	8233.8	Clostridiales	Order	Bacteria		Firmicutes	Clostridia	Clostridiales
ELASQEMK	750093	Bacteria	Superkingdom	Bacteria
GAALASVMGATLATK	873053	Clostridiales	Order	Bacteria		Firmicutes	Clostridia	Clostridiales
LDKVVMDAIYETR	258133	Lachnospiraceae bacterium 28-4	Species	Bacteria		Firmicutes	Clostridia	Clostridiales	Lachnospiraceae		Lachnospiraceae bacterium 28-4
VVMDAIYETR	1.45743e+06	Lachnospiraceae bacterium 28-4	Species	Bacteria		Firmicutes	Clostridia	Clostridiales	Lachnospiraceae		Lachnospiraceae bacterium 28-4
EADPVAMPYLK	123070	Firmicutes	Phylum	Bacteria		Firmicutes
EIIAGIEEEGLK	326147	Bacteria	Superkingdom	Bacteria
GEAPTPVPVR	531580	Bacteria	Superkingdom	Bacteria
ANLGAIQNR	578050	Bacteria	Superkingdom	Bacteria
YMYGNPDVDAANDSQQLAFK	117550	Lachnospiraceae bacterium 28-4	Species	Bacteria		Firmicutes	Clostridia	Clostridiales	Lachnospiraceae		Lachnospiraceae bacterium 28-4
SMAVIKDWENLDR	138225	Lachnospiraceae bacterium 28-4	Species	Bacteria		Firmicutes	Clostridia	Clostridiales	Lachnospiraceae		Lachnospiraceae bacterium 28-4
TDGLYEGTFYR	65857.3	Lachnospiraceae bacterium 28-4	Species	Bacteria		Firmicutes	Clostridia	Clostridiales	Lachnospiraceae		Lachnospiraceae bacterium 28-4
EAYDLVAPILTK	107888	Bacteria	Superkingdom	Bacteria
YGELAQIWR	60373.5	Lactobacillus	Genus	Bacteria		Firmicutes	Bacilli	Lactobacillales	Lactobacillaceae	Lactobacillus
DMIQALFFDR	26910	Lactobacillus	Genus	Bacteria		Firmicutes	Bacilli	Lactobacillales	Lactobacillaceae	Lactobacillus
MAELNPTNFR	117793	Lactobacillus reuteri	Species	Bacteria		Firmicutes	Bacilli	Lactobacillales	Lactobacillaceae	Lactobacillus	Lactobacillus reuteri
TDLDGNPIENSFR	104362	Lactobacillus	Genus	Bacteria		Firmicutes	Bacilli	Lactobacillales	Lactobacillaceae	Lactobacillus
NAVVCAVQLTR	283583	Bacteroidales	Order	Bacteria		Bacteroidetes	Bacteroidia	Bacteroidales
DIQFHPVK	118697	Bacteria	Superkingdom	Bacteria
NLYCGYNK	268273	Bacteroidales	Order	Bacteria		Bacteroidetes	Bacteroidia	Bacteroidales
LDCYMTYK	136430	Firmicutes	Phylum	Bacteria		Firmicutes
VDAGGGGTVACYMANR	180250	Clostridiales	Order	Bacteria		Firmicutes	Clostridia	Clostridiales
YLNTLTNLGPSPEPNLTVLWSTR	13654	Clostridiales	Order	Bacteria		Firmicutes	Clostridia	Clostridiales
WESEINVR	857690	Lachnospiraceae bacterium A4	Species	Bacteria		Firmicutes	Clostridia	Clostridiales	Lachnospiraceae		Lachnospiraceae bacterium A4
TSTFLDCYAQR	1.59527e+06	Firmicutes	Phylum	Bacteria		Firmicutes
AIRDEDGIIVDFETTGEFPK	267990	Lachnospiraceae bacterium A4	Species	Bacteria		Firmicutes	Clostridia	Clostridiales	Lachnospiraceae		Lachnospiraceae bacterium A4
ACSDNGYEVDPEVSEFFSTHR	184890	Lachnospiraceae bacterium A4	Species	Bacteria		Firmicutes	Clostridia	Clostridiales	Lachnospiraceae		Lachnospiraceae bacterium A4
AAINYVSTTR	263510	Lachnospiraceae bacterium MD308	Species	Bacteria		Firmicutes	Clostridia	Clostridiales	Lachnospiraceae		Lachnospiraceae bacterium MD308
IAEVTGLK	118847	Lachnospiraceae bacterium MD308	Species	Bacteria		Firmicutes	Clostridia	Clostridiales	Lachnospiraceae		Lachnospiraceae bacterium MD308
LEHTINNLSVTTENMTAAESR	400390	Lachnospiraceae	Family	Bacteria		Firmicutes	Clostridia	Clostridiales	Lachnospiraceae
VTDAVTDAGADK	410410	Lachnospiraceae bacterium MD308	Species	Bacteria		Firmicutes	Clostridia	Clostridiales	Lachnospiraceae		Lachnospiraceae bacterium MD308
TELVAAMAEQAGLSK	75199	Lachnospiraceae bacterium 28-4	Species	Bacteria		Firmicutes	Clostridia	Clostridiales	Lachnospiraceae		Lachnospiraceae bacterium 28-4
EGDYVAGANIAGFEK	13881	Bacteria	Superkingdom	Bacteria
NPAEPEFHQAAK	128879	Clostridiales	Order	Bacteria		Firmicutes	Clostridia	Clostridiales
VLYPVTFVPADNAGK	172680	Lachnospiraceae bacterium A2	Species	Bacteria		Firmicutes	Clostridia	Clostridiales	Lachnospiraceae		Lachnospiraceae bacterium A2
VSVYDEVER	110360	Lachnospiraceae bacterium A2	Species	Bacteria		Firmicutes	Clostridia	Clostridiales	Lachnospiraceae		Lachnospiraceae bacterium A2
EVVDNAPK	725920	Bacteria	Superkingdom	Bacteria
GLTVLELNDLVK	282180	Firmicutes	Phylum	Bacteria		Firmicutes
ITPYSSAAEAAQAVAR	211380	Lachnospiraceae	Family	Bacteria		Firmicutes	Clostridia	Clostridiales	Lachnospiraceae
ASSNAQDGVSLIQTAEGALNEAHSILQR	38698	Roseburia	Genus	Bacteria		Firmicutes	Clostridia	Clostridiales	Lachnospiraceae	Roseburia
ISETTQFNK	1938600	Roseburia	Genus	Bacteria		Firmicutes	Clostridia	Clostridiales	Lachnospiraceae	Roseburia
DTDMASEMVEYSK	266583	Clostridiales	Order	Bacteria		Firmicutes	Clostridia	Clostridiales
IRDTDMASEMVEYSK	4.83527e+06	Clostridiales	Order	Bacteria		Firmicutes	Clostridia	Clostridiales
IYAGKDELPK	1105200	Lachnospiraceae	Family	Bacteria		Firmicutes	Clostridia	Clostridiales	Lachnospiraceae
LAIAQILLDEGYIK	107337	Firmicutes	Phylum	Bacteria		Firmicutes
VILETGALK	124557	Bacteria	Superkingdom	Bacteria
AVQVGFVDK	192510	Clostridiales	Order	Bacteria		Firmicutes	Clostridia	Clostridiales
AVQVGFVDKK	971600	Clostridiales	Order	Bacteria		Firmicutes	Clostridia	Clostridiales
TVENDGYK	170420	Firmicutes	Phylum	Bacteria		Firmicutes
ADIFAAGDKIDASAISK	501730	Clostridiales	Order	Bacteria		Firmicutes	Clostridia	Clostridiales
IDASAISK	378337	Firmicutes	Phylum	Bacteria		Firmicutes
VTVQNLEVVR	1.37723e+06	Bacteria	Superkingdom	Bacteria
YDTVVLTK	266540	Lachnospiraceae bacterium 28-4	Species	Bacteria		Firmicutes	Clostridia	Clostridiales	Lachnospiraceae		Lachnospiraceae bacterium 28-4
LIVLDELK	177697	Clostridiales	Order	Bacteria		Firmicutes	Clostridia	Clostridiales
GGGVVFAPVPR	1493000	Clostridiales	Order	Bacteria		Firmicutes	Clostridia	Clostridiales
VNTMNLPGK	10105	Lachnospiraceae bacterium 28-4	Species	Bacteria		Firmicutes	Clostridia	Clostridiales	Lachnospiraceae		Lachnospiraceae bacterium 28-4
GYGYVGISADNVK	69547	Eubacterium sp. 14-2	Species	Bacteria		Firmicutes	Clostridia	Clostridiales	Eubacteriaceae	Eubacterium	Eubacterium sp. 14-2
SDAYAVSTER	70288.9	Eubacterium sp. 14-2	Species	Bacteria		Firmicutes	Clostridia	Clostridiales	Eubacteriaceae	Eubacterium	Eubacterium sp. 14-2
VGNDPASDASK	199033	Eubacterium sp. 14-2	Species	Bacteria		Firmicutes	Clostridia	Clostridiales	Eubacteriaceae	Eubacterium	Eubacterium sp. 14-2
ALYEVMEGRPVTIR	302757	Firmicutes	Phylum	Bacteria		Firmicutes
IMAWADQFR	77728.3	Lachnospiraceae	Family	Bacteria		Firmicutes	Clostridia	Clostridiales	Lachnospiraceae
LETSPEDIEGMHAAEGVLTVR	93632	Lachnospiraceae bacterium 28-4	Species	Bacteria		Firmicutes	Clostridia	Clostridiales	Lachnospiraceae		Lachnospiraceae bacterium 28-4
LQEDMPECYGK	142780	Lachnospiraceae bacterium 28-4	Species	Bacteria		Firmicutes	Clostridia	Clostridiales	Lachnospiraceae		Lachnospiraceae bacterium 28-4
MGSDFPQEPR	91345	Lachnospiraceae bacterium 28-4	Species	Bacteria		Firmicutes	Clostridia	Clostridiales	Lachnospiraceae		Lachnospiraceae bacterium 28-4
TNADTPMDAANAVK	92613.5	Lachnospiraceae bacterium 28-4	Species	Bacteria		Firmicutes	Clostridia	Clostridiales	Lachnospiraceae		Lachnospiraceae bacterium 28-4
DMQDMEFTIEDGK	54079.3	Bacteria	Superkingdom	Bacteria
EAALSELIPFQK	638990	Lachnospiraceae bacterium 28-4	Species	Bacteria		Firmicutes	Clostridia	Clostridiales	Lachnospiraceae		Lachnospiraceae bacterium 28-4
EGDYISLDGSTGK	284937	Bacteria	Superkingdom	Bacteria
GEVIGQALPASPGAAAGK	59947.3	Lachnospiraceae bacterium 28-4	Species	Bacteria		Firmicutes	Clostridia	Clostridiales	Lachnospiraceae		Lachnospiraceae bacterium 28-4
VYFNAEDAVLAHERDER	37770.3	Lachnospiraceae bacterium 28-4	Species	Bacteria		Firmicutes	Clostridia	Clostridiales	Lachnospiraceae		Lachnospiraceae bacterium 28-4
VQLMEAVK	797820	Firmicutes	Phylum	Bacteria		Firmicutes
TPQPITK	6652.1	Bacteria	Superkingdom	Bacteria
LGICGEHGGDPSSVEFCHK	139843	Firmicutes	Phylum	Bacteria		Firmicutes
IYESDPFAK	271600	Firmicutes	Phylum	Bacteria		Firmicutes
FGDTENPLLVSVR	468103	Bacteria	Superkingdom	Bacteria
KFGDTENPLLVSVR	232843	Bacteria	Superkingdom	Bacteria
ALTDEIDR	184997	Comamonas testosteroni	Species	Bacteria		Proteobacteria	Betaproteobacteria	Burkholderiales	Comamonadaceae	Comamonas	Comamonas testosteroni
ITEVIPVDLAIEQMKK	48116	Bacteroidales	Order	Bacteria		Bacteroidetes	Bacteroidia	Bacteroidales
HFLAAVPATAK	6763.3	Paraprevotella	Genus	Bacteria		Bacteroidetes	Bacteroidia	Bacteroidales	Prevotellaceae	Paraprevotella
ILEMMDDYVQLEK	188400	Lachnospiraceae bacterium 28-4	Species	Bacteria		Firmicutes	Clostridia	Clostridiales	Lachnospiraceae		Lachnospiraceae bacterium 28-4
GIEGMAYGTVIK	43299.5	Firmicutes	Phylum	Bacteria		Firmicutes
EGVDLSNDK	152730	Clostridiales	Order	Bacteria		Firmicutes	Clostridia	Clostridiales
IPAVQEK	792773	Bacteria	Superkingdom	Bacteria
LMTDAQALFAK	119625	Lachnospiraceae bacterium 28-4	Species	Bacteria		Firmicutes	Clostridia	Clostridiales	Lachnospiraceae		Lachnospiraceae bacterium 28-4
SLNPDECVALGASIQGGK	501050	Firmicutes	Phylum	Bacteria		Firmicutes
EAAEYEAQDK	32813	Firmicutes	Phylum	Bacteria		Firmicutes
EAAEYEAQDKK	161068	Firmicutes	Phylum	Bacteria		Firmicutes
YSPQQISAMILQK	528440	Firmicutes	Phylum	Bacteria		Firmicutes
LKADAESYLGEK	896800	Bacteria	Superkingdom	Bacteria
HFDMDLTR	3694.2	Clostridiales	Order	Bacteria		Firmicutes	Clostridia	Clostridiales
LDGIPPAMR	139838	Bacteria	Superkingdom	Bacteria
TAIPVQNAMK	861785	Firmicutes	Phylum	Bacteria		Firmicutes
NEADSFVFQTEK	345860	Firmicutes	Phylum	Bacteria		Firmicutes
VTEAVITVPAYFNDAQR	803640	Bacteria	Superkingdom	Bacteria
IINEPTAAALAYGLDNEK	499057	Firmicutes	Phylum	Bacteria		Firmicutes
IINEPTAAALAYGLDNEKEQK	2.00307e+06	Firmicutes	Phylum	Bacteria		Firmicutes
RIINEPTAAALAYGLDNEKEQK	183165	Firmicutes	Phylum	Bacteria		Firmicutes
FGSPLITNDGVTIAK	172575	Bacteria	Superkingdom	Bacteria
EYLSYTGYPGGQR	352845	Bacteroides	Genus	Bacteria		Bacteroidetes	Bacteroidia	Bacteroidales	Bacteroidaceae	Bacteroides
MDTLSYK	291357	Bacteria	Superkingdom	Bacteria
ALTSSYAGR	451547	Bacteria	Superkingdom	Bacteria
EDNPALGYR	52099.5	Bacteria	Superkingdom	Bacteria
SEFLYLGR	149735	Bacteria	Superkingdom	Bacteria
AIEAGLTPILCCGETLEQR	30681.5	Clostridiales	Order	Bacteria		Firmicutes	Clostridia	Clostridiales
MNMTPSEAVK	2.28757e+06	Firmicutes	Phylum	Bacteria		Firmicutes
DYFKEDDALLNKK	379693	Clostridiales	Order	Bacteria		Firmicutes	Clostridia	Clostridiales
ETQDMFDADSPLYGQQVAER	18706.7	Lactobacillus reuteri	Species	Bacteria		Firmicutes	Bacilli	Lactobacillales	Lactobacillaceae	Lactobacillus	Lactobacillus reuteri
TQPAPEPVAEQTSK	17004	Lactobacillus murinus	Species	Bacteria		Firmicutes	Bacilli	Lactobacillales	Lactobacillaceae	Lactobacillus	Lactobacillus murinus
DLNTDVTAVLIGSDVK	24376	Eubacterium sp. 14-2	Species	Bacteria		Firmicutes	Clostridia	Clostridiales	Eubacteriaceae	Eubacterium	Eubacterium sp. 14-2
NTYGTGCFLLMNTGEKPVFSK	65923	Bacteria	Superkingdom	Bacteria
TMLFNINDLK	70055	Firmicutes	Phylum	Bacteria		Firmicutes
VIDSAPDSEYMAK	285920	Roseburia intestinalis	Species	Bacteria		Firmicutes	Clostridia	Clostridiales	Lachnospiraceae	Roseburia	Roseburia intestinalis
TSEYCDSLKDK	90522	Clostridiales	Order	Bacteria		Firmicutes	Clostridia	Clostridiales
SAGTSAQLMAK	144770	Bacteria	Superkingdom	Bacteria
HLLGGVAK	53921	Bacteria	Superkingdom	Bacteria
LGTYNPNTNPATIDLNFER	66986.7	Bacteroidetes oral taxon 274	Species	Bacteria		Bacteroidetes					Bacteroidetes oral taxon 274
AAVEEGIIAGGGSAYIHASK	797370	Firmicutes	Phylum	Bacteria		Firmicutes
AAVEEGIIAGGGSAYIHASKK	99809	Clostridiales	Order	Bacteria		Firmicutes	Clostridia	Clostridiales
DGVITIEESK	512783	Bacteria	Superkingdom	Bacteria
SQIEETTSEFDKEK	300240	Firmicutes	Phylum	Bacteria		Firmicutes
TMLTELDLVEGMQFDR	167537	Clostridiales	Order	Bacteria		Firmicutes	Clostridia	Clostridiales
EIELEDPFENMGAQLVK	460915	Bacteria	Superkingdom	Bacteria
NLAAGANPISLR	505380	Eubacterium plexicaudatum	Species	Bacteria		Firmicutes	Clostridia	Clostridiales	Eubacteriaceae	Eubacterium	Eubacterium plexicaudatum
TNDVAGDGTTTATVLAQAMVSEGIK	359637	Eubacterium plexicaudatum	Species	Bacteria		Firmicutes	Clostridia	Clostridiales	Eubacteriaceae	Eubacterium	Eubacterium plexicaudatum
LIEGGYGGK	1218100	Butyrivibrio	Genus	Bacteria		Firmicutes	Clostridia	Clostridiales	Lachnospiraceae	Butyrivibrio
SESTFETTIR	2412000	Lachnospiraceae bacterium A4	Species	Bacteria		Firmicutes	Clostridia	Clostridiales	Lachnospiraceae		Lachnospiraceae bacterium A4
MVAGLEDISSGELR	965830	Lachnospiraceae bacterium A4	Species	Bacteria		Firmicutes	Clostridia	Clostridiales	Lachnospiraceae		Lachnospiraceae bacterium A4
TVTFGIRPEDIYDSQMMVEAK	312190	Lachnospiraceae bacterium A4	Species	Bacteria		Firmicutes	Clostridia	Clostridiales	Lachnospiraceae		Lachnospiraceae bacterium A4
VAGLSIPLPPAK	1.83907e+06	Lachnospiraceae bacterium A4	Species	Bacteria		Firmicutes	Clostridia	Clostridiales	Lachnospiraceae		Lachnospiraceae bacterium A4
FIVLDELKLDEIK	23935.5	Clostridiales	Order	Bacteria		Firmicutes	Clostridia	Clostridiales
LSLGDTIK	316040	Zygosaccharomyces rouxii	Species	Eukaryota	Fungi	Ascomycota	Saccharomycetes	Saccharomycetales	Saccharomycetaceae	Zygosaccharomyces	Zygosaccharomyces rouxii
MLGITQGSLSK	2.87233e+06	Lachnospiraceae bacterium MD335	Species	Bacteria		Firmicutes	Clostridia	Clostridiales	Lachnospiraceae		Lachnospiraceae bacterium MD335
GSAQNPDIFFQAR	1604100	Firmicutes	Phylum	Bacteria		Firmicutes
FFAEWWK	19681	Firmicutes	Phylum	Bacteria		Firmicutes
GVQYDVDLTAADLK	529180	Lachnospiraceae bacterium A4	Species	Bacteria		Firmicutes	Clostridia	Clostridiales	Lachnospiraceae		Lachnospiraceae bacterium A4
FLDPPLHEFVPTEEADIEK	2923300	Firmicutes	Phylum	Bacteria		Firmicutes
YFEQLIDK	945507	Firmicutes	Phylum	Bacteria		Firmicutes
DFPSDPVEQLK	1.56257e+06	Butyrivibrio	Genus	Bacteria		Firmicutes	Clostridia	Clostridiales	Lachnospiraceae	Butyrivibrio
LAIEAVFR	7765.7	Bacteria	Superkingdom	Bacteria
TLAEQFKAEYK	295155	Firmicutes	Phylum	Bacteria		Firmicutes
VMAWADK	325630	Firmicutes	Phylum	Bacteria		Firmicutes
KLMGEFLK	531500	Clostridiales	Order	Bacteria		Firmicutes	Clostridia	Clostridiales
NAQGEDVVAGVR	2.15813e+06	Bacteria	Superkingdom	Bacteria
FGDLKNPLLVSVR	108937	Firmicutes	Phylum	Bacteria		Firmicutes
FLNAYYDTK	1480000	Firmicutes	Phylum	Bacteria		Firmicutes
FIQMFSDVVMEVGK	28903.5	Bacteria	Superkingdom	Bacteria
FIQMFSDVVMEVGKK	95762.6	Bacteria	Superkingdom	Bacteria
ALYEALEGNPVTIR	2.31783e+06	Clostridiales	Order	Bacteria		Firmicutes	Clostridia	Clostridiales
EGDMSMR	595593	Lachnospiraceae bacterium A4	Species	Bacteria		Firmicutes	Clostridia	Clostridiales	Lachnospiraceae		Lachnospiraceae bacterium A4
VMAWADKYR	62752	Firmicutes	Phylum	Bacteria		Firmicutes
EMICSDTVEER	1600500	Bacteria	Superkingdom	Bacteria
IVFTAEDAENWNAR	940187	Lachnospiraceae bacterium A4	Species	Bacteria		Firmicutes	Clostridia	Clostridiales	Lachnospiraceae		Lachnospiraceae bacterium A4
QLGKDFPSDPVEQLK	238782	Lachnospiraceae bacterium JC7	Species	Bacteria		Firmicutes	Clostridia	Clostridiales	Lachnospiraceae		Lachnospiraceae bacterium JC7
ASQGILTVR	1.1125e+06	Firmicutes	Phylum	Bacteria		Firmicutes
LEYEVGTMIEIPR	128837	Clostridiales	Order	Bacteria		Firmicutes	Clostridia	Clostridiales
LAAAQAAIANVGK	108306	Lachnospiraceae bacterium A2	Species	Bacteria		Firmicutes	Clostridia	Clostridiales	Lachnospiraceae		Lachnospiraceae bacterium A2
KVVVETADAEIAAAGVK	307203	Clostridiales	Order	Bacteria		Firmicutes	Clostridia	Clostridiales
VVVETADAEIAAAGVK	311000	Clostridiales	Order	Bacteria		Firmicutes	Clostridia	Clostridiales
DLYNEETAENVR	91731	Bacteria	Superkingdom	Bacteria
LHMNPEQTIEFVNAVK	63442.3	Lactobacillus	Genus	Bacteria		Firmicutes	Bacilli	Lactobacillales	Lactobacillaceae	Lactobacillus
TASADQAEEMCK	75075.3	Lactobacillus	Genus	Bacteria		Firmicutes	Bacilli	Lactobacillales	Lactobacillaceae	Lactobacillus
TPIIAGNWK	139445	Bacteria	Superkingdom	Bacteria
AIAQILLDEGYIK	105135	Firmicutes	Phylum	Bacteria		Firmicutes
SWSLENFAEAMR	34921.5	Dorea sp. 5-2	Species	Bacteria		Firmicutes	Clostridia	Clostridiales	Lachnospiraceae	Dorea	Dorea sp. 5-2
AVQAVYDSGQQNVGAIYCSGQGGDQGTR	47625	Lachnospiraceae bacterium 10-1	Species	Bacteria		Firmicutes	Clostridia	Clostridiales	Lachnospiraceae		Lachnospiraceae bacterium 10-1
VGAATETEMKENK	141345	Clostridiales	Order	Bacteria		Firmicutes	Clostridia	Clostridiales
VQIEETTSDFDKEK	23715.5	Clostridium	Genus	Bacteria		Firmicutes	Clostridia	Clostridiales	Clostridiaceae	Clostridium
LRMEDALAATR	312573	Firmicutes	Phylum	Bacteria		Firmicutes
MEDALAATR	1.15577e+06	Firmicutes	Phylum	Bacteria		Firmicutes
TNDVAGDGTTTATVLAQAMINEGMK	1013350	Firmicutes	Phylum	Bacteria		Firmicutes
TELDLVEGMQFDR	579750	Bacteria	Superkingdom	Bacteria
YDAPAIPR	71447	Clostridiales	Order	Bacteria		Firmicutes	Clostridia	Clostridiales
DALDAVVSRPPFVSFDDSK	95983	Lactobacillus	Genus	Bacteria		Firmicutes	Bacilli	Lactobacillales	Lactobacillaceae	Lactobacillus
QFQNLFIR	6656.2	Lactobacillus	Genus	Bacteria		Firmicutes	Bacilli	Lactobacillales	Lactobacillaceae	Lactobacillus
YGNDDDRVDSIAQDVVHK	155577	Lachnospiraceae bacterium 10-1	Species	Bacteria		Firmicutes	Clostridia	Clostridiales	Lachnospiraceae		Lachnospiraceae bacterium 10-1
IEAAQLLVYK	180040	Clostridiales	Order	Bacteria		Firmicutes	Clostridia	Clostridiales
LGAFALTEPGAGTDAQGAQTK	225023	Lachnospiraceae	Family	Bacteria		Firmicutes	Clostridia	Clostridiales	Lachnospiraceae
MVISGALLR	115437	Firmicutes	Phylum	Bacteria		Firmicutes
CFITNGK	93963	Bacteria	Superkingdom	Bacteria
EYGGQGCDPLTYVMCVEELSK	52151.5	Bacteria	Superkingdom	Bacteria
AVLDGDEWILNGSK	363917	Eubacterium	Genus	Bacteria		Firmicutes	Clostridia	Clostridiales	Eubacteriaceae	Eubacterium
LGFLGIPVPK	215067	Clostridiales	Order	Bacteria		Firmicutes	Clostridia	Clostridiales
AGSTIEGLAK	1534500	Bacteria	Superkingdom	Bacteria
DLGIDVDKQLNPNGGAIALGHPVGASGCR	70246.7	Clostridiales	Order	Bacteria		Firmicutes	Clostridia	Clostridiales
VVLAGACR	1.43113e+06	Bacteria	Superkingdom	Bacteria
IEDFDIIEANEAFAAQSVAVGK	120549	Firmicutes	Phylum	Bacteria		Firmicutes
SGAFDAEIVPVMVK	477960	Lachnospiraceae bacterium 10-1	Species	Bacteria		Firmicutes	Clostridia	Clostridiales	Lachnospiraceae		Lachnospiraceae bacterium 10-1
ILVTLLHEMQAK	489277	Firmicutes	Phylum	Bacteria		Firmicutes
ALAETDATTIIGGGDSAAAVNQLGFGDK	76369.3	Clostridiales	Order	Bacteria		Firmicutes	Clostridia	Clostridiales
GEPKPELSLAPVAAR	472583	Clostridiales	Order	Bacteria		Firmicutes	Clostridia	Clostridiales
TVVWNGPMGVFENPVLAK	182267	Firmicutes	Phylum	Bacteria		Firmicutes
ELASLCDVFVNDAFGTAHR	61774	Firmicutes	Phylum	Bacteria		Firmicutes
AHCSNVGVTK	42673.5	Bacteria	Superkingdom	Bacteria
ENVVGYLMEK	212445	Clostridiales	Order	Bacteria		Firmicutes	Clostridia	Clostridiales
IDGAIPTIK	220490	Clostridiales	Order	Bacteria		Firmicutes	Clostridia	Clostridiales
NVVFDSESPADSNAR	322893	Lachnospiraceae bacterium A4	Species	Bacteria		Firmicutes	Clostridia	Clostridiales	Lachnospiraceae		Lachnospiraceae bacterium A4
IMAWADEFR	56654.7	Clostridiales	Order	Bacteria		Firmicutes	Clostridia	Clostridiales
LETSPEDIEGMHAAEGILTVR	372593	Firmicutes	Phylum	Bacteria		Firmicutes
GDVAESVKDNPALQR	38105.7	Roseburia	Genus	Bacteria		Firmicutes	Clostridia	Clostridiales	Lachnospiraceae	Roseburia
LAAAQAAINNK	41010.6	Bacteria	Superkingdom	Bacteria
TVEASVGGNFGR	323960	Acetivibrio ethanolgignens	Species	Bacteria		Firmicutes	Clostridia	Clostridiales	Ruminococcaceae	Acetivibrio	Acetivibrio ethanolgignens
AGEVIGSALPASPGAAAGK	273077	Firmicutes	Phylum	Bacteria		Firmicutes
GYDIVPEIMIPLVGEK	146720	Firmicutes	Phylum	Bacteria		Firmicutes
LAVTYPEIAK	4324000	Bacteria	Superkingdom	Bacteria
LETSPEDIEGMHAAQGILTVR	127345	Clostridiales	Order	Bacteria		Firmicutes	Clostridia	Clostridiales
IYESDPFAR	527460	Bacteria	Superkingdom	Bacteria
VYFTAEEAK	174005	Firmicutes	Phylum	Bacteria		Firmicutes
SAHIITGLPDAYGR	760830	Bacteria	Superkingdom	Bacteria
VEGDSVIVER	272055	Firmicutes	Phylum	Bacteria		Firmicutes
QAIDGDTAQVGPQISEHLDIPVISYAQDIK	65030.3	Clostridiales	Order	Bacteria		Firmicutes	Clostridia	Clostridiales
LKDQYGAEVTVVTMGLPK	240910	Firmicutes	Phylum	Bacteria		Firmicutes
YLIPLAK	53415.3	Bacteria	Superkingdom	Bacteria
EKPQQAEVVAVGPGGMVDGK	184587	Clostridiales	Order	Bacteria		Firmicutes	Clostridia	Clostridiales
SGIVLPGQSK	1054700	Clostridiales	Order	Bacteria		Firmicutes	Clostridia	Clostridiales
AGDNVIYSK	809020	Lachnospiraceae	Family	Bacteria		Firmicutes	Clostridia	Clostridiales	Lachnospiraceae
QLVAEETTK	2618000	Bacteria	Superkingdom	Bacteria
YIGADTDVPAGDIGVGAR	179538	Bacteria	Superkingdom	Bacteria
IEGHEDVYEK	205040	Lachnospiraceae bacterium 10-1	Species	Bacteria		Firmicutes	Clostridia	Clostridiales	Lachnospiraceae		Lachnospiraceae bacterium 10-1
GNASGMAVGLPEGQMGNSEVGHLNMGAGR	112600	Firmicutes	Phylum	Bacteria		Firmicutes
AFCDDDFKGFDR	129910	Firmicutes	Phylum	Bacteria		Firmicutes
YYAMDRDNNYDR	287863	Bacteria	Superkingdom	Bacteria
IVYQELTR	1.75223e+06	Bacteria	Superkingdom	Bacteria
VYVHCFLDGR	86015.7	Firmicutes	Phylum	Bacteria		Firmicutes
TGASVSGPIPLPTK	65647.3	Bacteria	Superkingdom	Bacteria
AYDHQVIDQSAEK	1.52237e+06	Firmicutes	Phylum	Bacteria		Firmicutes
VAGNEATDFENIDK	37459	Clostridiales	Order	Bacteria		Firmicutes	Clostridia	Clostridiales
VAGNEATDFENIDKAPEER	1256400	Clostridiales	Order	Bacteria		Firmicutes	Clostridia	Clostridiales
VAGNEATDFENIDKAPEERER	144713	Clostridiales	Order	Bacteria		Firmicutes	Clostridia	Clostridiales
SMDEYFGLETLK	192477	Bacillales	Order	Bacteria		Firmicutes	Bacilli	Bacillales
HAAQKPEALTF	238773	Clostridiales	Order	Bacteria		Firmicutes	Clostridia	Clostridiales
LHVYAGPEHK	2241.6	Bacteria	Superkingdom	Bacteria
IYYHHSDYVGGMK	208263	Firmicutes	Phylum	Bacteria		Firmicutes
AEDTVISAASCTTNCLAPMAK	362507	Clostridiales	Order	Bacteria		Firmicutes	Clostridia	Clostridiales
QMFDAEGYEVVAINDLTSPK	18658.5	Firmicutes	Phylum	Bacteria		Firmicutes
AGACNIVPNSTGAAK	1495350	Bacteria	Superkingdom	Bacteria
ASAHITAGAR	42044.3	Firmicutes	Phylum	Bacteria		Firmicutes
VPTPTGSTTILVAVVK	189670	Bacteria	Superkingdom	Bacteria
YADSVVAGEDNITVNGK	307800	Clostridium	Genus	Bacteria		Firmicutes	Clostridia	Clostridiales	Clostridiaceae	Clostridium
LPWGELK	411667	Bacteria	Superkingdom	Bacteria
VDVVLECTGFYTSK	507420	Bacteria	Superkingdom	Bacteria
VVISAPAGNDLPTIVYNVNHDTLK	206415	Clostridiales	Order	Bacteria		Firmicutes	Clostridia	Clostridiales
YAFDEDGK	407890	Clostridiales	Order	Bacteria		Firmicutes	Clostridia	Clostridiales
ILENDPFAK	211205	Clostridiales	Order	Bacteria		Firmicutes	Clostridia	Clostridiales
NQLGKDFPSDPVEQLK	496663	Butyrivibrio	Genus	Bacteria		Firmicutes	Clostridia	Clostridiales	Lachnospiraceae	Butyrivibrio
LDQIGVGK	943987	Firmicutes	Phylum	Bacteria		Firmicutes
LAVTYPEIAR	993227	Bacteria	Superkingdom	Bacteria
NLDTLLHPQFDTAALK	460093	Firmicutes	Phylum	Bacteria		Firmicutes
EMICSDTAEER	124760	Firmicutes	Phylum	Bacteria		Firmicutes
ADTVVAGEDSITVDGK	422793	Clostridiales	Order	Bacteria		Firmicutes	Clostridia	Clostridiales
SGIMSTIHAYTGDQMILDGPQR	387160	Lachnospiraceae	Family	Bacteria		Firmicutes	Clostridia	Clostridiales	Lachnospiraceae
VPTPTGSTTILVATVEK	3.25847e+06	Lachnospiraceae	Family	Bacteria		Firmicutes	Clostridia	Clostridiales	Lachnospiraceae
ALNDLAGIK	2014400	Lachnospiraceae	Family	Bacteria		Firmicutes	Clostridia	Clostridiales	Lachnospiraceae
SVTKDEINAAMK	1898800	Bacteria	Superkingdom	Bacteria
EADANKLPWGELK	801970	Lachnospiraceae bacterium 28-4	Species	Bacteria		Firmicutes	Clostridia	Clostridiales	Lachnospiraceae		Lachnospiraceae bacterium 28-4
TVEEIVSPLMMVR	234350	Oscillibacter sp. 1-3	Species	Bacteria		Firmicutes	Clostridia	Clostridiales	Oscillospiraceae	Oscillibacter	Oscillibacter sp. 1-3
QGIHPPVDVLPSLSR	64851	Oscillibacter sp. 1-3	Species	Bacteria		Firmicutes	Clostridia	Clostridiales	Oscillospiraceae	Oscillibacter	Oscillibacter sp. 1-3
YVNQGYEENR	74901.5	Oscillibacter	Genus	Bacteria		Firmicutes	Clostridia	Clostridiales	Oscillospiraceae	Oscillibacter
TVLFSNLANDPAVER	4945.6	Oscillibacter	Genus	Bacteria		Firmicutes	Clostridia	Clostridiales	Oscillospiraceae	Oscillibacter
DIDGLPMNPAAR	144780	Oscillibacter sp. 1-3	Species	Bacteria		Firmicutes	Clostridia	Clostridiales	Oscillospiraceae	Oscillibacter	Oscillibacter sp. 1-3
VYLVPGTGK	5337.1	Firmicutes	Phylum	Bacteria		Firmicutes
GTVPHEQSAK	63792.3	Bacteria	Superkingdom	Bacteria
MHITDPIADMLTR	35338	Firmicutes	Phylum	Bacteria		Firmicutes
VYAGADELPR	502183	Bacteria	Superkingdom	Bacteria
SFQLIDDGTQGVIR	525787	Firmicutes	Phylum	Bacteria		Firmicutes
DATPMFVCGVNTDTYAGQK	506970	Alistipes	Genus	Bacteria		Bacteroidetes	Bacteroidia	Bacteroidales	Rikenellaceae	Alistipes
VTAEKDPANLK	980280	Bacteria	Superkingdom	Bacteria
FVSNASCTTNCLAPIAK	1140465	Bacteria	Superkingdom	Bacteria
VVSWYDNEIGYSNK	4.41837e+06	Bacteria	Superkingdom	Bacteria
YVVMSAPSK	1.31323e+06	Bacteria	Superkingdom	Bacteria
TSIFDADAGIALTDTFVK	83346	Clostridiales	Order	Bacteria		Firmicutes	Clostridia	Clostridiales
GILGYTDEAVVSSDFLGDTR	174035	Flavonifractor	Genus	Bacteria		Firmicutes	Clostridia	Clostridiales	Ruminococcaceae	Flavonifractor
YDEICAAMK	634243	Bacteria	Superkingdom	Bacteria
LLEVTEIPALAQHVK	203307	Bilophila	Genus	Bacteria		Proteobacteria	Deltaproteobacteria	Desulfovibrionales	Desulfovibrionaceae	Bilophila
LEAEYVVESTGLFLTQEK	85531.3	Firmicutes bacterium ASF500	Species	Bacteria		Firmicutes					Firmicutes bacterium ASF500
YEEICAAMK	196173	Bacteria	Superkingdom	Bacteria
VLNDNFGITDGLMTTVHSTTATQK	98322	Bacteroides oleiciplenus	Species	Bacteria		Bacteroidetes	Bacteroidia	Bacteroidales	Bacteroidaceae	Bacteroides	Bacteroides oleiciplenus
VVSWYDNEMGYSNK	1.04132e+06	Bacteroidetes	Phylum	Bacteria		Bacteroidetes
HMYSVDHK	110770	Firmicutes	Phylum	Bacteria		Firmicutes
IETLTIR	75512	Metazoa	Kingdom	Eukaryota	Metazoa
AVIEEFNPGFTPDNK	374210	Clostridiales	Order	Bacteria		Firmicutes	Clostridia	Clostridiales
NKDLQVGQTGK	147647	Lachnospiraceae bacterium A4	Species	Bacteria		Firmicutes	Clostridia	Clostridiales	Lachnospiraceae		Lachnospiraceae bacterium A4
IVPMLTEQIK	449450	Lachnospiraceae	Family	Bacteria		Firmicutes	Clostridia	Clostridiales	Lachnospiraceae
TEPYAHALASVIDK	3661.05	Lachnospiraceae bacterium MD335	Species	Bacteria		Firmicutes	Clostridia	Clostridiales	Lachnospiraceae		Lachnospiraceae bacterium MD335
YVEIVEVVK	283180	Lachnospiraceae bacterium A4	Species	Bacteria		Firmicutes	Clostridia	Clostridiales	Lachnospiraceae		Lachnospiraceae bacterium A4
GVAAFVPEWNPENCIQCNK	57168	Bacteroidales	Order	Bacteria		Bacteroidetes	Bacteroidia	Bacteroidales
GIGAYQGGTCNETDR	107674	Bacteria	Superkingdom	Bacteria
ATLGAVQNR	751502	Bacteria	Superkingdom	Bacteria
SYLGALQNR	1159350	Firmicutes	Phylum	Bacteria		Firmicutes
ATAEALGLR	196023	Firmicutes	Phylum	Bacteria		Firmicutes
IGDTTVQPDNEATR	102724	Firmicutes	Phylum	Bacteria		Firmicutes
KIGDTTVQPDNEATR	22973.5	Firmicutes	Phylum	Bacteria		Firmicutes
LVLVTAINPTPAGEGK	100912	Bacteria	Superkingdom	Bacteria
AAMLTIMNPDDK	590407	Firmicutes	Phylum	Bacteria		Firmicutes
AAMLTIMNPDDKAGLEAALR	223376	Firmicutes	Phylum	Bacteria		Firmicutes
GGVQFNPDGTLNR	428457	Firmicutes	Phylum	Bacteria		Firmicutes
AFEPVAQSAGGAASATGWNK	83957	Lactobacillus	Genus	Bacteria		Firmicutes	Bacilli	Lactobacillales	Lactobacillaceae	Lactobacillus
EVENMCPVAK	901100	Clostridiales	Order	Bacteria		Firmicutes	Clostridia	Clostridiales
VAQEEHDAFAQILR	336330	Bacteria	Superkingdom	Bacteria
EYTLSDGSK	3289.7	Clostridiales	Order	Bacteria		Firmicutes	Clostridia	Clostridiales
NVMDNLWLGR	71409.3	Bacteria	Superkingdom	Bacteria
QALENITPQVEVK	197813	Bacteroidales	Order	Bacteria		Bacteroidetes	Bacteroidia	Bacteroidales
VGDVQEFDTFMGAVIDK	36956	Stomatobaculum longum	Species	Bacteria		Firmicutes	Clostridia	Clostridiales	Lachnospiraceae	Stomatobaculum	Stomatobaculum longum
GWFVQPTIIR	105848	Clostridiales	Order	Bacteria		Firmicutes	Clostridia	Clostridiales
ETIEVNGETYPVYK	208440	Bacteria	Superkingdom	Bacteria
MEISNTSHPFYTGK	381053	Bacteria	Superkingdom	Bacteria
DMSNDHVFLCR	40497.3	Bacteria	Superkingdom	Bacteria
GIHPENYR	83090	Bacteria	Superkingdom	Bacteria
QAQEAIKEEAGR	27543	Clostridiales	Order	Bacteria		Firmicutes	Clostridia	Clostridiales
WLGGMMTNFK	150083	Bacteria	Superkingdom	Bacteria
ENEKPFLMPVEDVFSITGR	6946.8	Bacteria	Superkingdom	Bacteria
GITINTSHVEYQTANR	155608	Bacteria	Superkingdom	Bacteria
TLTSTCTGVEMFR	173307	Alistipes	Genus	Bacteria		Bacteroidetes	Bacteroidia	Bacteroidales	Rikenellaceae	Alistipes
TLTSTCTGVEMFRK	58850.7	Alistipes	Genus	Bacteria		Bacteroidetes	Bacteroidia	Bacteroidales	Rikenellaceae	Alistipes
AGLGALQNR	376740	Bacteria	Superkingdom	Bacteria
VATYDLQPEMSAVEVTDK	66811	Bacteria	Superkingdom	Bacteria
IMAETEQLWR	165233	Alistipes	Genus	Bacteria		Bacteroidetes	Bacteroidia	Bacteroidales	Rikenellaceae	Alistipes
KAETLYNEIDR	76615.7	Alistipes putredinis	Species	Bacteria		Bacteroidetes	Bacteroidia	Bacteroidales	Rikenellaceae	Alistipes	Alistipes putredinis
YGMIYGGAQK	44159.5	Bacteria	Superkingdom	Bacteria
VIDLSAEK	343835	Bacteria	Superkingdom	Bacteria
VQVTTPEEYLGDVMGSITAR	14251	Lactobacillus	Genus	Bacteria		Firmicutes	Bacilli	Lactobacillales	Lactobacillaceae	Lactobacillus
VYTGSLQSGSYVLNASK	162197	Lactobacillus	Genus	Bacteria		Firmicutes	Bacilli	Lactobacillales	Lactobacillaceae	Lactobacillus
EAFLDLSK	54289	Bacteria	Superkingdom	Bacteria
FGAPLITNDGVTIAK	307380	Bacteria	Superkingdom	Bacteria
NLAAGANPIVMK	339350	Bacteria	Superkingdom	Bacteria
TSETYSEVVEGMMFDR	145380	Bacteria	Superkingdom	Bacteria
GYISPYMATDMEK	500510	Bacteria	Superkingdom	Bacteria
NYTTDGYTK	132603	Firmicutes	Phylum	Bacteria		Firmicutes
ELGGYGADGVYVCDHPLLK	120290	Firmicutes bacterium ASF500	Species	Bacteria		Firmicutes					Firmicutes bacterium ASF500
LAEELAEVLGGVVGGSR	71818.7	Firmicutes	Phylum	Bacteria		Firmicutes
LYGILLGDGIEGIAK	105960	Firmicutes bacterium ASF500	Species	Bacteria		Firmicutes					Firmicutes bacterium ASF500
AILNNEHR	9952	Lactobacillus	Genus	Bacteria		Firmicutes	Bacilli	Lactobacillales	Lactobacillaceae	Lactobacillus
DADLVVISAGAPQKPGETR	20910.7	Lactobacillus	Genus	Bacteria		Firmicutes	Bacilli	Lactobacillales	Lactobacillaceae	Lactobacillus
EVADMAYDIINKK	77395	Lactobacillus	Genus	Bacteria		Firmicutes	Bacilli	Lactobacillales	Lactobacillaceae	Lactobacillus
HGLEQVIEMPLNADEQAK	278165	Lactobacillus	Genus	Bacteria		Firmicutes	Bacilli	Lactobacillales	Lactobacillaceae	Lactobacillus
TIYSAEYSDAK	88042	Lactobacillus	Genus	Bacteria		Firmicutes	Bacilli	Lactobacillales	Lactobacillaceae	Lactobacillus
VGNAILIK	89901	Bacteria	Superkingdom	Bacteria
VQLVGDDLFVTNVSR	227473	Bacteria	Superkingdom	Bacteria
LWHDAGIEPR	182610	Firmicutes	Phylum	Bacteria		Firmicutes
MMVLASDIAK	189700	Firmicutes	Phylum	Bacteria		Firmicutes
VRPDTAHIELMK	83213.3	Firmicutes	Phylum	Bacteria		Firmicutes
ICSMGPCR	707523	Bacteria	Superkingdom	Bacteria
FTAGGAATHSDHGR	1.16493e+06	Firmicutes	Phylum	Bacteria		Firmicutes
FGEEGVCCR	137597	Firmicutes	Phylum	Bacteria		Firmicutes
ALEGDPEQQDVIR	101166	Lactobacillus johnsonii	Species	Bacteria		Firmicutes	Bacilli	Lactobacillales	Lactobacillaceae	Lactobacillus	Lactobacillus johnsonii
GIDRDQVER	217263	Bacteria	Superkingdom	Bacteria
GQVLAAPGSIQTHK	169920	Lactobacillaceae	Family	Bacteria		Firmicutes	Bacilli	Lactobacillales	Lactobacillaceae
GQVYILNKDEGGR	164683	Lactobacillus	Genus	Bacteria		Firmicutes	Bacilli	Lactobacillales	Lactobacillaceae	Lactobacillus
LMETVDEYIPTPER	157947	Lactobacillus	Genus	Bacteria		Firmicutes	Bacilli	Lactobacillales	Lactobacillaceae	Lactobacillus
VLADLALNNPAAFK	347563	Bacteroidales	Order	Bacteria		Bacteroidetes	Bacteroidia	Bacteroidales
LEDLSYSK	367550	Prevotella	Genus	Bacteria		Bacteroidetes	Bacteroidia	Bacteroidales	Prevotellaceae	Prevotella
DLADELAAYGADR	266810	Firmicutes	Phylum	Bacteria		Firmicutes
YKPEIFLVGATAIGR	21470	Fusicatenibacter	Genus	Bacteria		Firmicutes	Clostridia	Clostridiales	Lachnospiraceae	Fusicatenibacter
SVVDTVDIMDAK	353565	Clostridiales	Order	Bacteria		Firmicutes	Clostridia	Clostridiales
YVEILEVVK	219360	Clostridiales	Order	Bacteria		Firmicutes	Clostridia	Clostridiales
VNSTVVLPDNAATR	89932.7	Lactobacillus	Genus	Bacteria		Firmicutes	Bacilli	Lactobacillales	Lactobacillaceae	Lactobacillus
YSNEIAPAMNK	62831	Lactobacillus	Genus	Bacteria		Firmicutes	Bacilli	Lactobacillales	Lactobacillaceae	Lactobacillus
TGAQISGPVPLPTER	66717	Lactobacillus	Genus	Bacteria		Firmicutes	Bacilli	Lactobacillales	Lactobacillaceae	Lactobacillus
CIYGTIK	92350	Bacteroidales	Order	Bacteria		Bacteroidetes	Bacteroidia	Bacteroidales
MNTAPLQGIK	309654	Bacteroidales	Order	Bacteria		Bacteroidetes	Bacteroidia	Bacteroidales
AAAINIIPHSTGAAK	8006.4	Lactobacillus	Genus	Bacteria		Firmicutes	Bacilli	Lactobacillales	Lactobacillaceae	Lactobacillus
DVTADEVNEAVK	943547	Lactobacillus	Genus	Bacteria		Firmicutes	Bacilli	Lactobacillales	Lactobacillaceae	Lactobacillus
DVTADEVNEAVKK	40235	Lactobacillus	Genus	Bacteria		Firmicutes	Bacilli	Lactobacillales	Lactobacillaceae	Lactobacillus
NDGVDFVLECTGFYTSK	48172	Bacteria	Superkingdom	Bacteria
TVAWYDNEYSFTCQMVR	71548.3	Bacteria	Superkingdom	Bacteria
VLISAPAGSDLK	604783	Bacteria	Superkingdom	Bacteria
VPVPDGSVTELVSILSK	223653	Lactobacillus	Genus	Bacteria		Firmicutes	Bacilli	Lactobacillales	Lactobacillaceae	Lactobacillus
VYAEPQAQNIPWVK	756933	Lactobacillaceae	Family	Bacteria		Firmicutes	Bacilli	Lactobacillales	Lactobacillaceae
YDSTHGTFNHEVSATDDSIVVDGK	69366	Lactobacillus	Genus	Bacteria		Firmicutes	Bacilli	Lactobacillales	Lactobacillaceae	Lactobacillus
YDSTHGTFNHEVSATDDSIVVDGKK	188740	Lactobacillus	Genus	Bacteria		Firmicutes	Bacilli	Lactobacillales	Lactobacillaceae	Lactobacillus
DIILRPVVTEK	49867	Bacteria	Superkingdom	Bacteria
NAIEEIFDVK	71444.5	Lactobacillus	Genus	Bacteria		Firmicutes	Bacilli	Lactobacillales	Lactobacillaceae	Lactobacillus
LDMSEYQDQMAVNK	234047	Lactobacillus	Genus	Bacteria		Firmicutes	Bacilli	Lactobacillales	Lactobacillaceae	Lactobacillus
VVEQDLETPAAK	121897	Lactobacillus	Genus	Bacteria		Firmicutes	Bacilli	Lactobacillales	Lactobacillaceae	Lactobacillus
GIEEGCANSILVK	443640	Prevotella	Genus	Bacteria		Bacteroidetes	Bacteroidia	Bacteroidales	Prevotellaceae	Prevotella
SGETEDATIADLAVATNSGQIK	156287	Verrucomicrobiae bacterium DG1235	Species	Bacteria		Verrucomicrobia	Verrucomicrobiae				Verrucomicrobiae bacterium DG1235
ASVPSGASTGENEALELR	540130	Bacteria	Superkingdom	Bacteria
MTHVSTGGGASLEFLEGK	17049	Firmicutes	Phylum	Bacteria		Firmicutes
EAGADEVGSDDLVEK	221660	Lactobacillus	Genus	Bacteria		Firmicutes	Bacilli	Lactobacillales	Lactobacillaceae	Lactobacillus
FAELLGEVVVADTK	110673	Bacteria	Superkingdom	Bacteria
IAFEEAEHAAK	89374.7	Bacteria	Superkingdom	Bacteria
EVGYMYGMYK	313363	Bacteroidales	Order	Bacteria		Bacteroidetes	Bacteroidia	Bacteroidales
GGSDFSPR	167337	Bacteria	Superkingdom	Bacteria
ISAPLQGDLTSILNK	37184.7	Lactobacillus	Genus	Bacteria		Firmicutes	Bacilli	Lactobacillales	Lactobacillaceae	Lactobacillus
ASDIDEVILVGGSTR	59194.5	Bacteria	Superkingdom	Bacteria
IEASSGLTDAEIKR	58038	Bacteroidetes	Phylum	Bacteria		Bacteroidetes
LIEANTTIPTR	254610	Bacteria	Superkingdom	Bacteria
FHLDGIAPAPR	31381.7	Bacteria	Superkingdom	Bacteria
RIVNEPTAAALAYGLDK	54449.7	Bacteria	Superkingdom	Bacteria
VTAGQASGINDGAAALVLASK	182933	Firmicutes bacterium ASF500	Species	Bacteria		Firmicutes					Firmicutes bacterium ASF500
EELDEFGYNSQK	89859.3	Firmicutes bacterium ASF500	Species	Bacteria		Firmicutes					Firmicutes bacterium ASF500
FDDEIVPVMIK	14897	Firmicutes	Phylum	Bacteria		Firmicutes
LAEELAGVLGGVVGSSR	32590	Clostridiales	Order	Bacteria		Firmicutes	Clostridia	Clostridiales
ILADIQDGSFAK	283878	Clostridiales	Order	Bacteria		Firmicutes	Clostridia	Clostridiales
QITVQNLEVVR	143913	Lachnospiraceae	Family	Bacteria		Firmicutes	Clostridia	Clostridiales	Lachnospiraceae
TEENDGYSAVQVGFVDMK	18857	Lachnospiraceae bacterium M18-1	Species	Bacteria		Firmicutes	Clostridia	Clostridiales	Lachnospiraceae		Lachnospiraceae bacterium M18-1
VDTENNLLLIK	128537	Enterocloster	Genus	Bacteria		Firmicutes	Clostridia	Clostridiales	Lachnospiraceae	Enterocloster
SLLGAVQNR	14998000	Bacteria	Superkingdom	Bacteria
IEEELGDIAEYPGMK	163815	Flavonifractor	Genus	Bacteria		Firmicutes	Clostridia	Clostridiales	Ruminococcaceae	Flavonifractor
EGENEVVLEAPAGLIR	33129.5	Dorea sp. 5-2	Species	Bacteria		Firmicutes	Clostridia	Clostridiales	Lachnospiraceae	Dorea	Dorea sp. 5-2
NVVIFGDAMADR	412310	Clostridiales	Order	Bacteria		Firmicutes	Clostridia	Clostridiales
YDIVEDGVFK	37410	Lachnospiraceae	Family	Bacteria		Firmicutes	Clostridia	Clostridiales	Lachnospiraceae
DGIPATVIGIEYDPNR	222853	Firmicutes	Phylum	Bacteria		Firmicutes
VMNGPQAEVR	145636	Roseburia	Genus	Bacteria		Firmicutes	Clostridia	Clostridiales	Lachnospiraceae	Roseburia
TEVLDTGDPAQAGK	286270	Dorea sp. 5-2	Species	Bacteria		Firmicutes	Clostridia	Clostridiales	Lachnospiraceae	Dorea	Dorea sp. 5-2
MQALGFIETR	43806	Firmicutes	Phylum	Bacteria		Firmicutes
AGVVEGNFYDTEAMK	360407	Eubacterium plexicaudatum	Species	Bacteria		Firmicutes	Clostridia	Clostridiales	Eubacteriaceae	Eubacterium	Eubacterium plexicaudatum
GLTVAQDTQLR	153080	Firmicutes	Phylum	Bacteria		Firmicutes
NTLMNFAFK	113060	Clostridiales	Order	Bacteria		Firmicutes	Clostridia	Clostridiales
AMKDFAASLIAE	60138	Dorea sp. 5-2	Species	Bacteria		Firmicutes	Clostridia	Clostridiales	Lachnospiraceae	Dorea	Dorea sp. 5-2
HTVGTGSAPQNVIGSLVADPLER	129340	Lachnospiraceae	Family	Bacteria		Firmicutes	Clostridia	Clostridiales	Lachnospiraceae
CVAVTAGGCTAK	168920	Lachnospiraceae	Family	Bacteria		Firmicutes	Clostridia	Clostridiales	Lachnospiraceae
ITEPDRQFMFR	2486.6	Lachnospiraceae bacterium A4	Species	Bacteria		Firmicutes	Clostridia	Clostridiales	Lachnospiraceae		Lachnospiraceae bacterium A4
YIGADVDVPAGDIGTGAR	1.04273e+06	Firmicutes	Phylum	Bacteria		Firmicutes
VQFNNAIGPYK	1.38897e+06	Bacteria	Superkingdom	Bacteria
NSLTSLPIGGGK	899017	Bacteria	Superkingdom	Bacteria
VPWVDDKGQVQVNR	1301400	Bacteria	Superkingdom	Bacteria
CHGESMEGK	109167	Clostridiales	Order	Bacteria		Firmicutes	Clostridia	Clostridiales
YGMEGNYVAGANIAGFEK	517087	Bacteria	Superkingdom	Bacteria
EKPQQAEVLAVGPGGVVDGK	3.92293e+06	Roseburia	Genus	Bacteria		Firmicutes	Clostridia	Clostridiales	Lachnospiraceae	Roseburia
IIELMNTVDEHIPDPVR	405615	Lachnospiraceae bacterium MD335	Species	Bacteria		Firmicutes	Clostridia	Clostridiales	Lachnospiraceae		Lachnospiraceae bacterium MD335
VAGNVATDFENIDK	377730	Lachnospiraceae	Family	Bacteria		Firmicutes	Clostridia	Clostridiales	Lachnospiraceae
VAGNVATDFENIDKAPEER	3290600	Lachnospiraceae	Family	Bacteria		Firmicutes	Clostridia	Clostridiales	Lachnospiraceae
VAGNVATDFENIDKAPEERER	589443	Lachnospiraceae	Family	Bacteria		Firmicutes	Clostridia	Clostridiales	Lachnospiraceae
KTVCTGIEMFR	32517	Bacteria	Superkingdom	Bacteria
TVCTGIEMFR	519447	Bacteria	Superkingdom	Bacteria
TVCTGIEMFRK	163790	Bacteria	Superkingdom	Bacteria
LANVMPIEEAVDFMK	37880	Roseburia	Genus	Bacteria		Firmicutes	Clostridia	Clostridiales	Lachnospiraceae	Roseburia
KYIADNNIQLYTINAIDK	8263.5	Firmicutes	Phylum	Bacteria		Firmicutes
YIADNNIQLYTINAIDK	499817	Firmicutes	Phylum	Bacteria		Firmicutes
AIEIGMGK	3395.9	Firmicutes	Phylum	Bacteria		Firmicutes
AIEIGMGKR	81037	Firmicutes	Phylum	Bacteria		Firmicutes
AIDAGVDAVHK	531507	Clostridiales	Order	Bacteria		Firmicutes	Clostridia	Clostridiales
GSHENGDVFFQHR	169307	Bacteria	Superkingdom	Bacteria
GSQFNQPLLEFSGSCAGCAETSYAR	57474.3	Clostridiales	Order	Bacteria		Firmicutes	Clostridia	Clostridiales
IAGEQLPCVFDVSAR	677487	Clostridiales	Order	Bacteria		Firmicutes	Clostridia	Clostridiales
KPGMPADNTVK	5548.53	Clostridiales	Order	Bacteria		Firmicutes	Clostridia	Clostridiales
DHALNPEHPAMR	693140	Bacteria	Superkingdom	Bacteria
EMCNMDAVK	227287	Clostridiales	Order	Bacteria		Firmicutes	Clostridia	Clostridiales
GGMNHCQDEMK	51227.7	Bacteria	Superkingdom	Bacteria
GGMNHCQDEMKK	141750	Bacteria	Superkingdom	Bacteria
VTEVVVEDK	112755	Dorea sp. 5-2	Species	Bacteria		Firmicutes	Clostridia	Clostridiales	Lachnospiraceae	Dorea	Dorea sp. 5-2
AAGYTGEYITDKDR	36576	Clostridiales	Order	Bacteria		Firmicutes	Clostridia	Clostridiales
SAGTVCLFDDSLK	220657	Clostridiales	Order	Bacteria		Firmicutes	Clostridia	Clostridiales
TGTLVVATNEEVEK	109640	Dorea	Genus	Bacteria		Firmicutes	Clostridia	Clostridiales	Lachnospiraceae	Dorea
SEDVDVVYCVPAIDIVPVVEAVK	2851.7	Lachnospiraceae bacterium A4	Species	Bacteria		Firmicutes	Clostridia	Clostridiales	Lachnospiraceae		Lachnospiraceae bacterium A4
GMVIAYEPIWAIGTGK	200484	Firmicutes	Phylum	Bacteria		Firmicutes
GTNVEVGAENMYFEEK	280960	Clostridiales	Order	Bacteria		Firmicutes	Clostridia	Clostridiales
ILAEANVNPDTR	180570	Clostridiales	Order	Bacteria		Firmicutes	Clostridia	Clostridiales
GIINPDAATLTEGR	350208	Ruminococcus sp. 5_1_39BFAA	Species	Bacteria		Firmicutes	Clostridia	Clostridiales	Ruminococcaceae	Ruminococcus	Ruminococcus sp. 5_1_39BFAA
IYGVPTYK	482603	Lachnospiraceae	Family	Bacteria		Firmicutes	Clostridia	Clostridiales	Lachnospiraceae
SDRPVYCSDCFAK	282903	Firmicutes	Phylum	Bacteria		Firmicutes
GFQNEPQR	1.54407e+06	Firmicutes	Phylum	Bacteria		Firmicutes
ECGQEFVFTAGEQEFYAER	97784	Clostridiales	Order	Bacteria		Firmicutes	Clostridia	Clostridiales
IYYNHSDYVGGMR	44444	Clostridiales	Order	Bacteria		Firmicutes	Clostridia	Clostridiales
GDLGATQNR	1501650	Bacteria	Superkingdom	Bacteria
YFEQLIDAMK	511243	Firmicutes	Phylum	Bacteria		Firmicutes
VGHDGVITIEESK	242650	Bacteria	Superkingdom	Bacteria
NVTAGANPVGIR	76976.7	Bacteria	Superkingdom	Bacteria
DLCIGVPCILGK	43212.3	Mitsuokella	Genus	Bacteria		Firmicutes	Negativicutes	Selenomonadales	Selenomonadaceae	Mitsuokella
IAADTMVGGATLTK	678783	Prevotella	Genus	Bacteria		Bacteroidetes	Bacteroidia	Bacteroidales	Prevotellaceae	Prevotella
IIGMGGALDSAR	605505	Bacteria	Superkingdom	Bacteria
YAAEYAEK	194243	Prevotellaceae	Family	Bacteria		Bacteroidetes	Bacteroidia	Bacteroidales	Prevotellaceae
LDKYAAEYAEK	17391	Prevotella	Genus	Bacteria		Bacteroidetes	Bacteroidia	Bacteroidales	Prevotellaceae	Prevotella
AYVFESLRPTPELSYAVR	238193	Clostridiales	Order	Bacteria		Firmicutes	Clostridia	Clostridiales
YASFDAGK	129940	Bacteria	Superkingdom	Bacteria
AAACSIVPNSTGAAK	385465	Firmicutes	Phylum	Bacteria		Firmicutes
DDTVISAASCTTNCLAPMAK	300643	Ruminococcus	Genus	Bacteria		Firmicutes	Clostridia	Clostridiales	Ruminococcaceae	Ruminococcus
ENTVIVDGEGK	36173	Eubacterium	Genus	Bacteria		Firmicutes	Clostridia	Clostridiales	Eubacteriaceae	Eubacterium
ENTVIVDGEGKK	288810	Eubacterium	Genus	Bacteria		Firmicutes	Clostridia	Clostridiales	Eubacteriaceae	Eubacterium
GTFNVVGVK	121500	Bacteria	Superkingdom	Bacteria
FLSQPFFVAGQFTGLEGR	16518	Firmicutes	Phylum	Bacteria		Firmicutes
YAWEEAEHAAK	113943	Bacteria	Superkingdom	Bacteria
MHAEAGANADK	64333.5	Prevotella	Genus	Bacteria		Bacteroidetes	Bacteroidia	Bacteroidales	Prevotellaceae	Prevotella
AYIAHGEVLPVATK	39259	Dorea	Genus	Bacteria		Firmicutes	Clostridia	Clostridiales	Lachnospiraceae	Dorea
DTFMGFHCGNTCSR	46400.7	Firmicutes	Phylum	Bacteria		Firmicutes
TWPLHSPNVEK	768150	Firmicutes	Phylum	Bacteria		Firmicutes
IQVFEGTVLK	543130	Bacteria	Superkingdom	Bacteria
IQVFEGTVLKR	85480.3	Bacteria	Superkingdom	Bacteria
GTNLTQYDETINTYWR	432520	Firmicutes	Phylum	Bacteria		Firmicutes
FVALDVGAGDICEK	224020	Lachnospiraceae bacterium 28-4	Species	Bacteria		Firmicutes	Clostridia	Clostridiales	Lachnospiraceae		Lachnospiraceae bacterium 28-4
CPVCNAPASK	7241.8	Clostridiales	Order	Bacteria		Firmicutes	Clostridia	Clostridiales
FVCSVCGYVHEGDAAPEK	143020	Blautia	Genus	Bacteria		Firmicutes	Clostridia	Clostridiales	Lachnospiraceae	Blautia
MAGVNPDHSTEDLFNAIK	81910.5	Mucispirillum schaedleri	Species	Bacteria		Deferribacteres	Deferribacteres	Deferribacterales	Deferribacteraceae	Mucispirillum	Mucispirillum schaedleri
YLTTSQGIPVGTDLSSMTTGEK	92654.5	Mucispirillum schaedleri	Species	Bacteria		Deferribacteres	Deferribacteres	Deferribacterales	Deferribacteraceae	Mucispirillum	Mucispirillum schaedleri
DDLLGINSGIIK	60446	Mucispirillum schaedleri	Species	Bacteria		Deferribacteres	Deferribacteres	Deferribacterales	Deferribacteraceae	Mucispirillum	Mucispirillum schaedleri
DVSALVLGGHGDTMVPLIR	11073.4	Mucispirillum schaedleri	Species	Bacteria		Deferribacteres	Deferribacteres	Deferribacterales	Deferribacteraceae	Mucispirillum	Mucispirillum schaedleri
ENLYVEECYANK	161860	Marvinbryantia formatexigens	Species	Bacteria		Firmicutes	Clostridia	Clostridiales	Lachnospiraceae	Marvinbryantia	Marvinbryantia formatexigens
AYQNFPTAVLPAPVADAVK	61016.7	Mucispirillum schaedleri	Species	Bacteria		Deferribacteres	Deferribacteres	Deferribacterales	Deferribacteraceae	Mucispirillum	Mucispirillum schaedleri
AAAVSMIPTSTGAAK	588830	Bacteria	Superkingdom	Bacteria
DPANLPWAK	377237	Bacteria	Superkingdom	Bacteria
NEITYGEDYIAIDGKK	132420	Mucispirillum schaedleri	Species	Bacteria		Deferribacteres	Deferribacteres	Deferribacterales	Deferribacteraceae	Mucispirillum	Mucispirillum schaedleri
NVTAEEINAAVK	245450	Mucispirillum schaedleri	Species	Bacteria		Deferribacteres	Deferribacteres	Deferribacterales	Deferribacteraceae	Mucispirillum	Mucispirillum schaedleri
SQHNIISNASCTTNCLAPVAK	94841	Mucispirillum schaedleri	Species	Bacteria		Deferribacteres	Deferribacteres	Deferribacterales	Deferribacteraceae	Mucispirillum	Mucispirillum schaedleri
VPTPNVSVVDLVCK	219340	Mucispirillum schaedleri	Species	Bacteria		Deferribacteres	Deferribacteres	Deferribacterales	Deferribacteraceae	Mucispirillum	Mucispirillum schaedleri
YDSVHGNLK	300707	Bacteria	Superkingdom	Bacteria
VIDLLEPYTK	48100	Bacteria	Superkingdom	Bacteria
VSLVYGQMNESPGAR	78098	Mucispirillum schaedleri	Species	Bacteria		Deferribacteres	Deferribacteres	Deferribacterales	Deferribacteraceae	Mucispirillum	Mucispirillum schaedleri
AIYLNMPTEALYEEAIK	44900	Mucispirillum schaedleri	Species	Bacteria		Deferribacteres	Deferribacteres	Deferribacterales	Deferribacteraceae	Mucispirillum	Mucispirillum schaedleri
EVDLDSDKLTENTR	63244.5	Mucispirillum schaedleri	Species	Bacteria		Deferribacteres	Deferribacteres	Deferribacterales	Deferribacteraceae	Mucispirillum	Mucispirillum schaedleri
NYVDGSTPSGSSAYEK	105232	Clostridium	Genus	Bacteria		Firmicutes	Clostridia	Clostridiales	Clostridiaceae	Clostridium
NWAAIDAGAK	13832	Firmicutes	Phylum	Bacteria		Firmicutes
GVSEDILADLR	378363	Firmicutes	Phylum	Bacteria		Firmicutes
VSGNSPIIAALAEAAENGK	64932.5	Clostridiales	Order	Bacteria		Firmicutes	Clostridia	Clostridiales
YVHLGTGNYNDSTAK	136823	Bacteria	Superkingdom	Bacteria
EVGYLYGQYR	297445	Firmicutes	Phylum	Bacteria		Firmicutes
AVNAGGVLVSGLEMSQNSER	456700	Clostridiales	Order	Bacteria		Firmicutes	Clostridia	Clostridiales
GGSDFDPNGR	231440	Roseobacter denitrificans	Species	Bacteria		Proteobacteria	Alphaproteobacteria	Rhodobacterales	Rhodobacteraceae	Roseobacter	Roseobacter denitrificans
YYIEVANMPTTNDALR	114013	Firmicutes	Phylum	Bacteria		Firmicutes
EQDLNNPQIQK	84619.7	Mucispirillum schaedleri	Species	Bacteria		Deferribacteres	Deferribacteres	Deferribacterales	Deferribacteraceae	Mucispirillum	Mucispirillum schaedleri
DTSYMFLTGPDVIK	83041.7	Mucispirillum schaedleri	Species	Bacteria		Deferribacteres	Deferribacteres	Deferribacterales	Deferribacteraceae	Mucispirillum	Mucispirillum schaedleri
ELMSYLPQNNMEEAPFK	78810.5	Mucispirillum schaedleri	Species	Bacteria		Deferribacteres	Deferribacteres	Deferribacterales	Deferribacteraceae	Mucispirillum	Mucispirillum schaedleri
FGVVEGLMTTVHSTTATQK	2835500	Bacteria	Superkingdom	Bacteria
VLDLIAHMK	694890	Bacteroidales	Order	Bacteria		Bacteroidetes	Bacteroidia	Bacteroidales
EKAQAHIEAGAK	100181	Bacteria	Superkingdom	Bacteria
SLLIVNGK	61727	Prevotella	Genus	Bacteria		Bacteroidetes	Bacteroidia	Bacteroidales	Prevotellaceae	Prevotella
GTQFVSNASCTTNCLAPITK	818400	Bacteroides	Genus	Bacteria		Bacteroidetes	Bacteroidia	Bacteroidales	Bacteroidaceae	Bacteroides
QVPDTNEVKLDPVTGTLIR	180347	Clostridiales	Order	Bacteria		Firmicutes	Clostridia	Clostridiales
VTVISMGPPQADLALR	18236.3	Anaerotruncus sp. G3(2012)	Species	Bacteria		Firmicutes	Clostridia	Clostridiales	Ruminococcaceae	Anaerotruncus	Anaerotruncus sp. G3(2012)
ATIGQVSNTEHENLK	11371.2	Mucispirillum schaedleri	Species	Bacteria		Deferribacteres	Deferribacteres	Deferribacterales	Deferribacteraceae	Mucispirillum	Mucispirillum schaedleri
VGDIIQSGEGADIK	119670	Mucispirillum schaedleri	Species	Bacteria		Deferribacteres	Deferribacteres	Deferribacterales	Deferribacteraceae	Mucispirillum	Mucispirillum schaedleri
DITEITMPLTK	39608	Mucispirillum schaedleri	Species	Bacteria		Deferribacteres	Deferribacteres	Deferribacterales	Deferribacteraceae	Mucispirillum	Mucispirillum schaedleri
EMPHAWIAGPQTLQLK	27548	Mucispirillum schaedleri	Species	Bacteria		Deferribacteres	Deferribacteres	Deferribacterales	Deferribacteraceae	Mucispirillum	Mucispirillum schaedleri
QAEVTGLDSDKK	30651.5	Mucispirillum schaedleri	Species	Bacteria		Deferribacteres	Deferribacteres	Deferribacterales	Deferribacteraceae	Mucispirillum	Mucispirillum schaedleri
VVVLDPNPQIMSK	69068.7	Mucispirillum schaedleri	Species	Bacteria		Deferribacteres	Deferribacteres	Deferribacterales	Deferribacteraceae	Mucispirillum	Mucispirillum schaedleri
AAVEEGIVPGGGVALVR	68012	Bacteria	Superkingdom	Bacteria
EVELADALENIGAQMVK	13234	Mucispirillum schaedleri	Species	Bacteria		Deferribacteres	Deferribacteres	Deferribacterales	Deferribacteraceae	Mucispirillum	Mucispirillum schaedleri
VGVIKDWDSR	353620	Firmicutes	Phylum	Bacteria		Firmicutes
ADIDYGFAEADTTYGK	3703400	Bacteria	Superkingdom	Bacteria
TEFYSEGTIPLQTLR	2.07547e+06	Firmicutes	Phylum	Bacteria		Firmicutes
LGGADIAR	739650	Bacteria	Superkingdom	Bacteria
DAQLVAESIAQQLENR	489053	Clostridiales	Order	Bacteria		Firmicutes	Clostridia	Clostridiales
VWIYKGEVLPTK	91421.7	Bacteria	Superkingdom	Bacteria
GSIVLIEK	170587	Bacteroidetes	Phylum	Bacteria		Bacteroidetes
IGMTSVFSADGK	321140	Bacteria	Superkingdom	Bacteria
VIAEHNLLLIK	93909.7	Bacteria	Superkingdom	Bacteria
VTVQNLQVLK	186333	Bacteria	Superkingdom	Bacteria
ENAAAELPENAGQEGIK	99954	Mucispirillum schaedleri	Species	Bacteria		Deferribacteres	Deferribacteres	Deferribacterales	Deferribacteraceae	Mucispirillum	Mucispirillum schaedleri
GSDYLCDQDAAEYLCR	72425.5	Mucispirillum schaedleri	Species	Bacteria		Deferribacteres	Deferribacteres	Deferribacterales	Deferribacteraceae	Mucispirillum	Mucispirillum schaedleri
LTLEDVVAYAK	521090	Bacteroidales	Order	Bacteria		Bacteroidetes	Bacteroidia	Bacteroidales
YASFDGGK	408315	Bacteria	Superkingdom	Bacteria
YMNGAATNPDFDVVAR	280693	Bacteria	Superkingdom	Bacteria
MDAGFEFMQK	72471	Bacteria	Superkingdom	Bacteria
SAAELAQELVAAK	325943	Lachnospiraceae bacterium 28-4	Species	Bacteria		Firmicutes	Clostridia	Clostridiales	Lachnospiraceae		Lachnospiraceae bacterium 28-4
FQNATNQLDNTAR	2.36293e+06	Firmicutes	Phylum	Bacteria		Firmicutes
IQTVITQK	362543	Firmicutes	Phylum	Bacteria		Firmicutes
AADAAAAIGEGLQAFCIPGSVADQR	95700.3	Firmicutes	Phylum	Bacteria		Firmicutes
VNCYGANDVR	318617	Bacteria	Superkingdom	Bacteria
MVEGIQPICFENAK	583410	Firmicutes	Phylum	Bacteria		Firmicutes
ELLSSYEFPGDDTPIVK	215950	Mucispirillum schaedleri	Species	Bacteria		Deferribacteres	Deferribacteres	Deferribacterales	Deferribacteraceae	Mucispirillum	Mucispirillum schaedleri
GLASFVDYANIDKAPEER	75887	Mucispirillum schaedleri	Species	Bacteria		Deferribacteres	Deferribacteres	Deferribacterales	Deferribacteraceae	Mucispirillum	Mucispirillum schaedleri
TTLTAALTNVLSQK	30217.3	Mucispirillum schaedleri	Species	Bacteria		Deferribacteres	Deferribacteres	Deferribacterales	Deferribacteraceae	Mucispirillum	Mucispirillum schaedleri
GPQAVVTDR	108170	Clostridiales	Order	Bacteria		Firmicutes	Clostridia	Clostridiales
IDYVTSPGWIDGPGGR	235430	Firmicutes	Phylum	Bacteria		Firmicutes
ENAPLIVGGR	162465	Bacteria	Superkingdom	Bacteria
GMAENGDVFFQHR	168727	Bacteroides	Genus	Bacteria		Bacteroidetes	Bacteroidia	Bacteroidales	Bacteroidaceae	Bacteroides
NPFTLDSK	381915	Bacteria	Superkingdom	Bacteria
YCQAYFAYDSK	111723	Bacteria	Superkingdom	Bacteria
ITEVIPVDLAVEQMK	363883	Bacteroidetes	Phylum	Bacteria		Bacteroidetes
ITEVIPVDLAVEQMKK	232940	Bacteroidetes	Phylum	Bacteria		Bacteroidetes
FYGLGADGTVGANK	671677	Bacteria	Superkingdom	Bacteria
IAQEIGLGNR	559780	Bacteria	Superkingdom	Bacteria
TNTILQSAFFR	530307	Bacteria	Superkingdom	Bacteria
AYDHQLVDQSAAK	23626	Clostridiales	Order	Bacteria		Firmicutes	Clostridia	Clostridiales
AEFLAHGESAK	434017	Mucispirillum schaedleri	Species	Bacteria		Deferribacteres	Deferribacteres	Deferribacterales	Deferribacteraceae	Mucispirillum	Mucispirillum schaedleri
GANQGALHTEPVALFK	323655	Mucispirillum schaedleri	Species	Bacteria		Deferribacteres	Deferribacteres	Deferribacterales	Deferribacteraceae	Mucispirillum	Mucispirillum schaedleri
TCTADAILFGTR	211170	Mucispirillum schaedleri	Species	Bacteria		Deferribacteres	Deferribacteres	Deferribacterales	Deferribacteraceae	Mucispirillum	Mucispirillum schaedleri
NFTQTTGIGDAQTVDK	119670	Mucispirillum schaedleri	Species	Bacteria		Deferribacteres	Deferribacteres	Deferribacterales	Deferribacteraceae	Mucispirillum	Mucispirillum schaedleri
IAYLFEEVGK	98569	Bacteria	Superkingdom	Bacteria
LLHDGQIPSTDVNLK	115943	Mucispirillum schaedleri	Species	Bacteria		Deferribacteres	Deferribacteres	Deferribacterales	Deferribacteraceae	Mucispirillum	Mucispirillum schaedleri
TEQNLMTAFAGESQAR	223410	Bacteria	Superkingdom	Bacteria
IAFQNVTADQAK	1304800	Clostridiales	Order	Bacteria		Firmicutes	Clostridia	Clostridiales
TVVIAYEPIWAIGTGK	28131.8	Bacteria	Superkingdom	Bacteria
AVAELSDATTVIGGGDSVNAVK	206475	Clostridiales	Order	Bacteria		Firmicutes	Clostridia	Clostridiales
DGEVLLLQNTR	324085	Clostridiales	Order	Bacteria		Firmicutes	Clostridia	Clostridiales
ELPGVAAADNK	962210	Clostridiales	Order	Bacteria		Firmicutes	Clostridia	Clostridiales
LLLPVDHVEGK	236657	Clostridiales	Order	Bacteria		Firmicutes	Clostridia	Clostridiales
TVDDLTNLQGK	10930	Cellulosilyticum lentocellum	Species	Bacteria		Firmicutes	Clostridia	Clostridiales	Lachnospiraceae	Cellulosilyticum	Cellulosilyticum lentocellum
VAAELKDGEVLLLQNTR	79900.7	Clostridiales	Order	Bacteria		Firmicutes	Clostridia	Clostridiales
GPFADAHLLK	49625.7	Bacteria	Superkingdom	Bacteria
HVPVYITEDMVGHK	891007	Bacteria	Superkingdom	Bacteria
KGPFADAHLLK	17621	Bacteria	Superkingdom	Bacteria
STIFPQMVGHTIAVHDGR	128623	Firmicutes	Phylum	Bacteria		Firmicutes
ADTYVVFAVTTPDIGTR	22422	Bacteria	Superkingdom	Bacteria
DGHDFTVGIPSDTPIAQAER	24380	Lachnospiraceae bacterium 3-1	Species	Bacteria		Firmicutes	Clostridia	Clostridiales	Lachnospiraceae		Lachnospiraceae bacterium 3-1
GWEGFEFGDHYDK	48513.7	Clostridiales	Order	Bacteria		Firmicutes	Clostridia	Clostridiales
ITTIYEGTNEIQR	791870	Bacteria	Superkingdom	Bacteria
SSTTAELIFNDVK	348200	Firmicutes	Phylum	Bacteria		Firmicutes
FLVYSAAELK	39655	Bacteria	Superkingdom	Bacteria
YVGMSGQK	96108.3	Bacteria	Superkingdom	Bacteria
DASTIVAINK	883090	Firmicutes	Phylum	Bacteria		Firmicutes
GSALNALVSESTDPNAPEYACIK	342177	Firmicutes	Phylum	Bacteria		Firmicutes
ELMDAVDSYIPTPDR	758297	Firmicutes	Phylum	Bacteria		Firmicutes
ELMDAVDSYIPTPDRK	567547	Firmicutes	Phylum	Bacteria		Firmicutes
SYFDENMR	115830	Clostridiales	Order	Bacteria		Firmicutes	Clostridia	Clostridiales
ETDKPFLMPVEDVFTITGR	77803	Bacteria	Superkingdom	Bacteria
ELLNEYEFPGDDTPIIQGSALK	1761100	Clostridiales	Order	Bacteria		Firmicutes	Clostridia	Clostridiales
CDMVDDPELLELVDMEIR	12767	Bacteria	Superkingdom	Bacteria
MHITDPVADMLTR	187657	Bacteria	Superkingdom	Bacteria
GNLANWIIPGK	11535	Bacteria	Superkingdom	Bacteria
IGEGLHTVEAGEDSITVDGK	711517	Clostridiaceae	Family	Bacteria		Firmicutes	Clostridia	Clostridiales	Clostridiaceae
YDTAQGGYAGR	1059620	Clostridiales	Order	Bacteria		Firmicutes	Clostridia	Clostridiales
QMFGAEGYEIVAINDLTDPK	247320	Ruminococcaceae	Family	Bacteria		Firmicutes	Clostridia	Clostridiales	Ruminococcaceae
LDYEVGTMIEIPR	96337	Clostridiales	Order	Bacteria		Firmicutes	Clostridia	Clostridiales
IGADFPDDPKEQLMGAIK	672787	Firmicutes	Phylum	Bacteria		Firmicutes
LYEALEGCPVTIR	510223	Firmicutes	Phylum	Bacteria		Firmicutes
GVTYDVDLTADDLK	151460	Eubacterium plexicaudatum	Species	Bacteria		Firmicutes	Clostridia	Clostridiales	Eubacteriaceae	Eubacterium	Eubacterium plexicaudatum
IMDWADKYR	73615	Firmicutes	Phylum	Bacteria		Firmicutes
LAAAQAAISQR	788257	Ruminococcus	Genus	Bacteria		Firmicutes	Clostridia	Clostridiales	Ruminococcaceae	Ruminococcus
VAELADTLEGDEK	411910	Coprococcus	Genus	Bacteria		Firmicutes	Clostridia	Clostridiales	Lachnospiraceae	Coprococcus
MEAVLEDPYILITDK	136637	Bacteria	Superkingdom	Bacteria
MEAVLEDPYILITDKK	437045	Bacteria	Superkingdom	Bacteria
LGDHVTLALNPEK	534393	Eubacterium plexicaudatum	Species	Bacteria		Firmicutes	Clostridia	Clostridiales	Eubacteriaceae	Eubacterium	Eubacterium plexicaudatum
ATIIYVTHDQTEAMTLGTR	129870	Clostridiales	Order	Bacteria		Firmicutes	Clostridia	Clostridiales
FSIALPPAK	345437	Eubacterium plexicaudatum	Species	Bacteria		Firmicutes	Clostridia	Clostridiales	Eubacteriaceae	Eubacterium	Eubacterium plexicaudatum
LIDGGYNGK	374153	Firmicutes	Phylum	Bacteria		Firmicutes
AAAQAALLAATSEIDK	72890.7	Clostridiales	Order	Bacteria		Firmicutes	Clostridia	Clostridiales
ILVAETR	54121	Firmicutes	Phylum	Bacteria		Firmicutes
EGWNTGFVTEFVSK	147140	Hungatella hathewayi	Species	Bacteria		Firmicutes	Clostridia	Clostridiales	Clostridiaceae	Hungatella	Hungatella hathewayi
FTGIECSK	228970	Eubacterium limosum	Species	Bacteria		Firmicutes	Clostridia	Clostridiales	Eubacteriaceae	Eubacterium	Eubacterium limosum
LANVMPIDDAVDFMK	553807	Eubacterium plexicaudatum	Species	Bacteria		Firmicutes	Clostridia	Clostridiales	Eubacteriaceae	Eubacterium	Eubacterium plexicaudatum
RGTAVTVPTWSAEK	72027.5	Eubacterium plexicaudatum	Species	Bacteria		Firmicutes	Clostridia	Clostridiales	Eubacteriaceae	Eubacterium	Eubacterium plexicaudatum
AAAAGCPDAAAAIDKK	657770	Eubacterium plexicaudatum	Species	Bacteria		Firmicutes	Clostridia	Clostridiales	Eubacteriaceae	Eubacterium	Eubacterium plexicaudatum
QTGFAMLCETNPQEVMDLSPVAHLATIEGK	28663	Clostridiales	Order	Bacteria		Firmicutes	Clostridia	Clostridiales
VYDELPAVVSK	563360	Eubacterium plexicaudatum	Species	Bacteria		Firmicutes	Clostridia	Clostridiales	Eubacteriaceae	Eubacterium	Eubacterium plexicaudatum
IETWDYADLK	243087	Clostridiales	Order	Bacteria		Firmicutes	Clostridia	Clostridiales
ASNIGEVCQFAAAGK	1.05963e+06	Bacteria	Superkingdom	Bacteria
AYDHELIDASAR	24298.5	Firmicutes	Phylum	Bacteria		Firmicutes
WDVAVLPK	23501	Clostridiales	Order	Bacteria		Firmicutes	Clostridia	Clostridiales
EQHITITAGSNMSDDEIDR	55416.7	Eubacterium plexicaudatum	Species	Bacteria		Firmicutes	Clostridia	Clostridiales	Eubacteriaceae	Eubacterium	Eubacterium plexicaudatum
IINEPTAAALAYGLDNESEQK	359533	Bacteria	Superkingdom	Bacteria
TAIPVQNALK	959780	Bacteria	Superkingdom	Bacteria
VGDMPLVLHGGTGIPADMIK	444163	Clostridiales	Order	Bacteria		Firmicutes	Clostridia	Clostridiales
MELFGSVGKA	491137	Bacteria	Superkingdom	Bacteria
MELFGSVGK	821470	Bacteria	Superkingdom	Bacteria
EKMELFGSVGKA	42804	Firmicutes	Phylum	Bacteria		Firmicutes
EKMELFGSVGK	402637	Firmicutes	Phylum	Bacteria		Firmicutes
YAVGQFNINNLEWTK	528963	Bacteria	Superkingdom	Bacteria
KLLAPGAEAIK	60428.7	Firmicutes	Phylum	Bacteria		Firmicutes
ADEAQAAGADYVGAEELIPK	179333	Clostridiales	Order	Bacteria		Firmicutes	Clostridia	Clostridiales
SVTLTSTMGPGVK	332070	Firmicutes	Phylum	Bacteria		Firmicutes
MSEYALQLR	293620	Clostridiales	Order	Bacteria		Firmicutes	Clostridia	Clostridiales
KALGTGVEK	121725	Firmicutes	Phylum	Bacteria		Firmicutes
TDNAASYTALLNQ	234955	Firmicutes	Phylum	Bacteria		Firmicutes
LGNPSQYDAFAINMVK	325810	Firmicutes	Phylum	Bacteria		Firmicutes
SIAELGIYPAVDPLASTSR	55203.3	Clostridiales	Order	Bacteria		Firmicutes	Clostridia	Clostridiales
VALSGLTMAEYFR	61312.3	Bacteria	Superkingdom	Bacteria
FIHENYQSVK	74349	Eubacterium plexicaudatum	Species	Bacteria		Firmicutes	Clostridia	Clostridiales	Eubacteriaceae	Eubacterium	Eubacterium plexicaudatum
IYQIVEEINR	67427	Bacteria	Superkingdom	Bacteria
IYQIVEEINRR	452560	Bacteria	Superkingdom	Bacteria
VVFIEDYR	634237	Firmicutes	Phylum	Bacteria		Firmicutes
AQQEFMNIK	373885	Firmicutes	Phylum	Bacteria		Firmicutes
VQGLVEAMEANK	83079.7	Firmicutes	Phylum	Bacteria		Firmicutes
ALNDADIPHIK	30825.3	Clostridiales	Order	Bacteria		Firmicutes	Clostridia	Clostridiales
ILTEAGVNPDTR	238785	Clostridiales	Order	Bacteria		Firmicutes	Clostridia	Clostridiales
GGDDTLFALTDGILR	46498	Eubacterium plexicaudatum	Species	Bacteria		Firmicutes	Clostridia	Clostridiales	Eubacteriaceae	Eubacterium	Eubacterium plexicaudatum
FVSTHSEGEEPYR	63123.5	Eubacterium plexicaudatum	Species	Bacteria		Firmicutes	Clostridia	Clostridiales	Eubacteriaceae	Eubacterium	Eubacterium plexicaudatum
WPIELFSR	111969	Bacteria	Superkingdom	Bacteria
AGDDAAGLAISENMR	788567	Geobacter	Genus	Bacteria		Proteobacteria	Deltaproteobacteria	Desulfuromonadales	Geobacteraceae	Geobacter
ALAETDATTIIGGGDSAAAVNTLGFGDK	208041	Clostridiales	Order	Bacteria		Firmicutes	Clostridia	Clostridiales
QMFGAEGYEVVAINDLTDPK	4937.15	Firmicutes	Phylum	Bacteria		Firmicutes
HTVEAGEDSITVDGK	783363	Clostridiales	Order	Bacteria		Firmicutes	Clostridia	Clostridiales
IAGELLPCVFDVSAR	112894	Bacteroidetes	Phylum	Bacteria		Bacteroidetes
KGDAVVEMNYK	16133.5	Firmicutes	Phylum	Bacteria		Firmicutes
LGTNYDLFNYYGAEDAER	696050	Clostridiales	Order	Bacteria		Firmicutes	Clostridia	Clostridiales
TVSTQSLNIFGDHSDVYACR	294820	Clostridiales	Order	Bacteria		Firmicutes	Clostridia	Clostridiales
IASDNALFGQPECGLGIIPGFGGTQR	38908.3	Roseburia	Genus	Bacteria		Firmicutes	Clostridia	Clostridiales	Lachnospiraceae	Roseburia
GAFENGTITGK	485327	Clostridiales	Order	Bacteria		Firmicutes	Clostridia	Clostridiales
HENDTLAGK	183403	Clostridium	Genus	Bacteria		Firmicutes	Clostridia	Clostridiales	Clostridiaceae	Clostridium
LHQIMTGIHDGSAAAAEK	196937	Clostridiales	Order	Bacteria		Firmicutes	Clostridia	Clostridiales
TVALAGFGNVAWGAAK	152867	Clostridiales	Order	Bacteria		Firmicutes	Clostridia	Clostridiales
VPWVDDNGQTHVNR	454265	Clostridium	Genus	Bacteria		Firmicutes	Clostridia	Clostridiales	Clostridiaceae	Clostridium
YSWTAEEVDTK	249999	Clostridiales	Order	Bacteria		Firmicutes	Clostridia	Clostridiales
YYIEVANMPTTNEALK	617077	Firmicutes	Phylum	Bacteria		Firmicutes
EIGYMYGQYR	476060	Bacteria	Superkingdom	Bacteria
CQVETSCPMGAAK	81694	Lachnospiraceae bacterium 3-1	Species	Bacteria		Firmicutes	Clostridia	Clostridiales	Lachnospiraceae		Lachnospiraceae bacterium 3-1
GTTCQYGLYDTFALSEK	85124	Firmicutes	Phylum	Bacteria		Firmicutes
LYVEECYANK	108990	Clostridiales	Order	Bacteria		Firmicutes	Clostridia	Clostridiales
KYGMEGDYVAGANIAGFEK	101090	Eubacterium plexicaudatum	Species	Bacteria		Firmicutes	Clostridia	Clostridiales	Eubacteriaceae	Eubacterium	Eubacterium plexicaudatum
YGMEGDYVAGANIAGFEK	219540	Eubacterium plexicaudatum	Species	Bacteria		Firmicutes	Clostridia	Clostridiales	Eubacteriaceae	Eubacterium	Eubacterium plexicaudatum
AANAGGVATSALEMTQNSER	879847	Firmicutes	Phylum	Bacteria		Firmicutes
KSAEYHEGR	21190.7	Clostridiales	Order	Bacteria		Firmicutes	Clostridia	Clostridiales
STYEGVLTGK	79733	Firmicutes	Phylum	Bacteria		Firmicutes
ELLNEYEFPGDDTPVIQGSALK	280183	Clostridiales	Order	Bacteria		Firmicutes	Clostridia	Clostridiales
NLSTEEGYETFVVPDDVGGR	216750	Clostridiales	Order	Bacteria		Firmicutes	Clostridia	Clostridiales
SAMNGTILAHTDGNVPNLMVK	2716600	Firmicutes	Phylum	Bacteria		Firmicutes
LMEGAAEGR	763100	Clostridiales	Order	Bacteria		Firmicutes	Clostridia	Clostridiales
LMEGAAEGRK	33061.3	Clostridiales	Order	Bacteria		Firmicutes	Clostridia	Clostridiales
QLYGESEGK	706093	Bacteria	Superkingdom	Bacteria
IYATTDK	310720	Bacteria	Superkingdom	Bacteria
QLYGESEGKDQK	263573	Bacteria	Superkingdom	Bacteria
NMFALLGK	64158.3	Bacteria	Superkingdom	Bacteria
AEYPIAVER	264150	Bacteria	Superkingdom	Bacteria
ALIDTDFYKK	41989.3	Clostridiales	Order	Bacteria		Firmicutes	Clostridia	Clostridiales
ENSLCGLGQTAPNPVLSTLR	102029	Acetivibrio ethanolgignens	Species	Bacteria		Firmicutes	Clostridia	Clostridiales	Ruminococcaceae	Acetivibrio	Acetivibrio ethanolgignens
YVCCNADEGDPGAFMDR	969157	Bacteria	Superkingdom	Bacteria
IHNTGLVEIPMGTTLR	398940	Clostridiales	Order	Bacteria		Firmicutes	Clostridia	Clostridiales
LGAGAFVCGEETALMTSIEGNR	6057.2	Firmicutes	Phylum	Bacteria		Firmicutes
NVDCYIINTGDFMGK	502443	Firmicutes	Phylum	Bacteria		Firmicutes
NVDCYIINTGDFMGKK	85398.7	Clostridiales	Order	Bacteria		Firmicutes	Clostridia	Clostridiales
NSPGTVVTDMK	1.20176e+06	Lachnospiraceae	Family	Bacteria		Firmicutes	Clostridia	Clostridiales	Lachnospiraceae
IKGEPGVDEVK	3313.65	Lachnospiraceae bacterium 28-4	Species	Bacteria		Firmicutes	Clostridia	Clostridiales	Lachnospiraceae		Lachnospiraceae bacterium 28-4
IKGEPGVDEVKLDK	461910	Lachnospiraceae bacterium 28-4	Species	Bacteria		Firmicutes	Clostridia	Clostridiales	Lachnospiraceae		Lachnospiraceae bacterium 28-4
AIVRDPQVFLMDEPLSNLDAK	12755	Bacteria	Superkingdom	Bacteria
EAAEILDITQYLER	41489	Ruminococcaceae	Family	Bacteria		Firmicutes	Clostridia	Clostridiales	Ruminococcaceae
GDIDVQGPVVVDTSAVIVGNIK	36325.7	Eubacterium plexicaudatum	Species	Bacteria		Firmicutes	Clostridia	Clostridiales	Eubacteriaceae	Eubacterium	Eubacterium plexicaudatum
GNLSTTGSFSISGR	136180	Eubacterium plexicaudatum	Species	Bacteria		Firmicutes	Clostridia	Clostridiales	Eubacteriaceae	Eubacterium	Eubacterium plexicaudatum
TQSAFSDDGLAVGAGLEDLGK	976900	Clostridiales	Order	Bacteria		Firmicutes	Clostridia	Clostridiales
ALQACGLEVTSIR	341060	Firmicutes	Phylum	Bacteria		Firmicutes
VGGATYQVPIEVRPER	112545	Bacteria	Superkingdom	Bacteria
REILPDPLYNSVLVTK	74214	Firmicutes	Phylum	Bacteria		Firmicutes
LAGEIMDAANNTGSAVK	325680	Firmicutes	Phylum	Bacteria		Firmicutes
LVNSIMLDGKK	58643	Firmicutes	Phylum	Bacteria		Firmicutes
KVAEGLIAMAVR	25150	Clostridiales	Order	Bacteria		Firmicutes	Clostridia	Clostridiales
WLPITAASR	118052	Hungatella hathewayi	Species	Bacteria		Firmicutes	Clostridia	Clostridiales	Clostridiaceae	Hungatella	Hungatella hathewayi
FLDPPLHEFVPTDEEDIKK	620903	Clostridiales	Order	Bacteria		Firmicutes	Clostridia	Clostridiales
ILPVQQGDFEK	663280	Clostridiales	Order	Bacteria		Firmicutes	Clostridia	Clostridiales
GMGTCCVSGCSDIAMDEENKK	100726	Clostridium	Genus	Bacteria		Firmicutes	Clostridia	Clostridiales	Clostridiaceae	Clostridium
ALAASPGAACGK	1018330	Firmicutes	Phylum	Bacteria		Firmicutes
VVVETADAEIK	323733	Clostridiales	Order	Bacteria		Firmicutes	Clostridia	Clostridiales
DMQDMEFTIEDKK	83288.7	Firmicutes	Phylum	Bacteria		Firmicutes
DMQDMEFTIEDK	141700	Firmicutes	Phylum	Bacteria		Firmicutes
GANLAEMTK	9361	Bacteria	Superkingdom	Bacteria
LAAAQAAINN	58292.3	Clostridiales	Order	Bacteria		Firmicutes	Clostridia	Clostridiales
VVFTAEDAKEWAAR	206877	Firmicutes	Phylum	Bacteria		Firmicutes
MDFSLDK	130227	Bacteria	Superkingdom	Bacteria
GAPGFSFGTK	334858	Clostridiales	Order	Bacteria		Firmicutes	Clostridia	Clostridiales
LGAFALTEPGAGTDAQGCQTK	1809800	Clostridiales	Order	Bacteria		Firmicutes	Clostridia	Clostridiales
LIEVIQGENTPDEMR	559627	Eubacterium plexicaudatum	Species	Bacteria		Firmicutes	Clostridia	Clostridiales	Eubacteriaceae	Eubacterium	Eubacterium plexicaudatum
LIEVIQGENTPDEMRDK	2.36507e+06	Eubacterium plexicaudatum	Species	Bacteria		Firmicutes	Clostridia	Clostridiales	Eubacteriaceae	Eubacterium	Eubacterium plexicaudatum
LAEYTNPITPAQANDQDFTQNQQLVLDNK	23730.5	Firmicutes	Phylum	Bacteria		Firmicutes
LLGSIQSPITNFAR	313883	Firmicutes	Phylum	Bacteria		Firmicutes
DAQSVVLVDYR	676153	Firmicutes	Phylum	Bacteria		Firmicutes
ESLTQSINESMK	5836.5	Mucispirillum schaedleri	Species	Bacteria		Deferribacteres	Deferribacteres	Deferribacterales	Deferribacteraceae	Mucispirillum	Mucispirillum schaedleri
EHYEKPSVK	145790	Bacteria	Superkingdom	Bacteria
TTINAAAGNDIK	298720	Mucispirillum schaedleri	Species	Bacteria		Deferribacteres	Deferribacteres	Deferribacterales	Deferribacteraceae	Mucispirillum	Mucispirillum schaedleri
TYNFTEFPTVPSSAISK	154873	Mucispirillum schaedleri	Species	Bacteria		Deferribacteres	Deferribacteres	Deferribacterales	Deferribacteraceae	Mucispirillum	Mucispirillum schaedleri
VETLTTDCSMVATYIGAEAK	16105	Mucispirillum schaedleri	Species	Bacteria		Deferribacteres	Deferribacteres	Deferribacterales	Deferribacteraceae	Mucispirillum	Mucispirillum schaedleri
MYVCTSCLR	340250	Bacteria	Superkingdom	Bacteria
DGAFGLIEPEFH	54255	Lachnospiraceae bacterium M18-1	Species	Bacteria		Firmicutes	Clostridia	Clostridiales	Lachnospiraceae		Lachnospiraceae bacterium M18-1
IEVTIPVK	207433	Bacteria	Superkingdom	Bacteria
QKIEVTIPVK	110830	Bacteria	Superkingdom	Bacteria
VQFVADEMKK	94980.7	Clostridiales	Order	Bacteria		Firmicutes	Clostridia	Clostridiales
VSEYGMQLR	265693	Firmicutes	Phylum	Bacteria		Firmicutes
CVNIPSYLVK	144144	Clostridiales	Order	Bacteria		Firmicutes	Clostridia	Clostridiales
RLDNVVFR	734145	Bacteria	Superkingdom	Bacteria
AGLETGGTGSLVRPVVACK	516300	Lachnospiraceae bacterium A2	Species	Bacteria		Firmicutes	Clostridia	Clostridiales	Lachnospiraceae		Lachnospiraceae bacterium A2
CIAQCPFDVIEDGTPGYK	206837	Lachnospiraceae bacterium A2	Species	Bacteria		Firmicutes	Clostridia	Clostridiales	Lachnospiraceae		Lachnospiraceae bacterium A2
CQVETACPMK	244203	Lachnospiraceae bacterium A2	Species	Bacteria		Firmicutes	Clostridia	Clostridiales	Lachnospiraceae		Lachnospiraceae bacterium A2
GTTCQYGLYDTFDLSEK	355837	Lachnospiraceae bacterium A2	Species	Bacteria		Firmicutes	Clostridia	Clostridiales	Lachnospiraceae		Lachnospiraceae bacterium A2
MEDDELVIDKDACNNCGR	121180	Lachnospiraceae bacterium A2	Species	Bacteria		Firmicutes	Clostridia	Clostridiales	Lachnospiraceae		Lachnospiraceae bacterium A2
LGLSEWEK	72750.3	Clostridiales	Order	Bacteria		Firmicutes	Clostridia	Clostridiales
GHEFAGEIVK	172867	Clostridiales	Order	Bacteria		Firmicutes	Clostridia	Clostridiales
SIIGHMAYDSTSWR	25857.5	Bacteria	Superkingdom	Bacteria
VDNGSDEFNSIR	58037.3	Clostridiales	Order	Bacteria		Firmicutes	Clostridia	Clostridiales
VIFHYDFED	81996	Clostridiales	Order	Bacteria		Firmicutes	Clostridia	Clostridiales
VNLGLDNNTWGGGFSK	100114	Bacteria	Superkingdom	Bacteria
YEEAAVLDPICNSYK	33180.2	Clostridiales	Order	Bacteria		Firmicutes	Clostridia	Clostridiales
AASNESFGYNTDEIVSSDIVGMR	598940	Firmicutes	Phylum	Bacteria		Firmicutes
SGIMCTIHAYTGDQMTLDGPQR	215277	Clostridiales	Order	Bacteria		Firmicutes	Clostridia	Clostridiales
VTSGEDSITVDGK	316600	Catonella morbi	Species	Bacteria		Firmicutes	Clostridia	Clostridiales	Lachnospiraceae	Catonella	Catonella morbi
YDSTQGKYELADK	235423	Clostridiales	Order	Bacteria		Firmicutes	Clostridia	Clostridiales
YVIISAPAGNDLPTIVYNVNHDK	77261.7	Lachnospiraceae bacterium M18-1	Species	Bacteria		Firmicutes	Clostridia	Clostridiales	Lachnospiraceae		Lachnospiraceae bacterium M18-1
AQAHIEAGAK	690310	Bacteria	Superkingdom	Bacteria
ALNDLAPIK	3195.2	Firmicutes	Phylum	Bacteria		Firmicutes
AAAVNIVPNSTGAAK	1.08413e+07	Bacteria	Superkingdom	Bacteria
LPDAIFIVDPK	91045.5	Firmicutes	Phylum	Bacteria		Firmicutes
RLPDAIFIVDPK	655550	Clostridiales	Order	Bacteria		Firmicutes	Clostridia	Clostridiales
CGMFYVNER	370753	Bacteria	Superkingdom	Bacteria
NHPLTQR	11512.5	Bacteria	Superkingdom	Bacteria
DASATSIYGSR	211654	Bacteroidetes	Phylum	Bacteria		Bacteroidetes
EVNQLLSEIDR	144835	Lysobacter concretionis	Species	Bacteria		Proteobacteria	Gammaproteobacteria	Xanthomonadales	Xanthomonadaceae	Lysobacter	Lysobacter concretionis
VAVTTLAK	322090	Bacteria	Superkingdom	Bacteria
FGEEGICCR	50121.3	Firmicutes	Phylum	Bacteria		Firmicutes
DHAEITLSELR	76082	Clostridiales	Order	Bacteria		Firmicutes	Clostridia	Clostridiales
LVKPGDSVLILGGAGK	50533.7	Clostridiales	Order	Bacteria		Firmicutes	Clostridia	Clostridiales
TEQMILDIVGER	19108.5	Flavonifractor plautii	Species	Bacteria		Firmicutes	Clostridia	Clostridiales	Ruminococcaceae	Flavonifractor	Flavonifractor plautii
INGFTFVETEYDYK	298600	Clostridiales	Order	Bacteria		Firmicutes	Clostridia	Clostridiales
YGISSIEEAEK	607990	Butyrivibrio fibrisolvens	Species	Bacteria		Firmicutes	Clostridia	Clostridiales	Lachnospiraceae	Butyrivibrio	Butyrivibrio fibrisolvens
EDMAEVIEDAFR	60728	Clostridiales	Order	Bacteria		Firmicutes	Clostridia	Clostridiales
NVSIVEPLVTIK	116570	Eubacterium plexicaudatum	Species	Bacteria		Firmicutes	Clostridia	Clostridiales	Eubacteriaceae	Eubacterium	Eubacterium plexicaudatum
YGTSVQALLK	77711	Clostridiales	Order	Bacteria		Firmicutes	Clostridia	Clostridiales
ILPTLNPGSIVTDTR	390110	Clostridiales	Order	Bacteria		Firmicutes	Clostridia	Clostridiales
QAFAFGCGTK	138905	Eubacterium plexicaudatum	Species	Bacteria		Firmicutes	Clostridia	Clostridiales	Eubacteriaceae	Eubacterium	Eubacterium plexicaudatum
SFICCSSTYK	129273	Eubacterium plexicaudatum	Species	Bacteria		Firmicutes	Clostridia	Clostridiales	Eubacteriaceae	Eubacterium	Eubacterium plexicaudatum
MVVQHNMQAMNANR	872523	Roseburia	Genus	Bacteria		Firmicutes	Clostridia	Clostridiales	Lachnospiraceae	Roseburia
AGDISYGEMVNGQWVEHTLPAGGVDIK	33261.3	Dorea sp. 5-2	Species	Bacteria		Firmicutes	Clostridia	Clostridiales	Lachnospiraceae	Dorea	Dorea sp. 5-2
EVVDTISDPK	99878.3	Dorea sp. 5-2	Species	Bacteria		Firmicutes	Clostridia	Clostridiales	Lachnospiraceae	Dorea	Dorea sp. 5-2
QVCNVPDGAQYAVLK	233610	Dorea sp. 5-2	Species	Bacteria		Firmicutes	Clostridia	Clostridiales	Lachnospiraceae	Dorea	Dorea sp. 5-2
VNVGSASLEGLK	286465	Dorea sp. 5-2	Species	Bacteria		Firmicutes	Clostridia	Clostridiales	Lachnospiraceae	Dorea	Dorea sp. 5-2
MDYLATQSANGTYDNEVDRANLQK	244179	Oscillibacter sp. 1-3	Species	Bacteria		Firmicutes	Clostridia	Clostridiales	Oscillospiraceae	Oscillibacter	Oscillibacter sp. 1-3
DLAYEAGSK	123390	Clostridiales	Order	Bacteria		Firmicutes	Clostridia	Clostridiales
WCFPTMPSEEWK	11341	Firmicutes	Phylum	Bacteria		Firmicutes
EAVIAYEPIWAIGTGK	107590	Firmicutes	Phylum	Bacteria		Firmicutes
TATTEQAEEVCAGIR	237170	Clostridiales	Order	Bacteria		Firmicutes	Clostridia	Clostridiales
AFEHGITPIMCCGETLEQR	304260	Firmicutes	Phylum	Bacteria		Firmicutes
EQGVTMDFIR	526197	Firmicutes	Phylum	Bacteria		Firmicutes
EYFAETSETVNKK	171637	Clostridiales	Order	Bacteria		Firmicutes	Clostridia	Clostridiales
VGIIKDWDSK	322883	Firmicutes	Phylum	Bacteria		Firmicutes
DAQLVAENIALQLENR	181133	Firmicutes	Phylum	Bacteria		Firmicutes
ACIAEMYDQATADAVR	286417	Eubacterium plexicaudatum	Species	Bacteria		Firmicutes	Clostridia	Clostridiales	Eubacteriaceae	Eubacterium	Eubacterium plexicaudatum
GTNVAVGAENMYYEEK	102967	Roseburia	Genus	Bacteria		Firmicutes	Clostridia	Clostridiales	Lachnospiraceae	Roseburia
TATSDQAQEVCGAIR	952357	Clostridiales	Order	Bacteria		Firmicutes	Clostridia	Clostridiales
FDASAVGNHEFDWGIEK	78650.7	Eubacterium plexicaudatum	Species	Bacteria		Firmicutes	Clostridia	Clostridiales	Eubacteriaceae	Eubacterium	Eubacterium plexicaudatum
YLIQTLDAMK	127312	Eubacterium plexicaudatum	Species	Bacteria		Firmicutes	Clostridia	Clostridiales	Eubacteriaceae	Eubacterium	Eubacterium plexicaudatum
AVNAGGVAVSGLEMSQNSGR	188545	Anaerotruncus sp. G3(2012)	Species	Bacteria		Firmicutes	Clostridia	Clostridiales	Ruminococcaceae	Anaerotruncus	Anaerotruncus sp. G3(2012)
AVTLSGPDGYIYDPDGITTEEK	302147	Anaerotruncus sp. G3(2012)	Species	Bacteria		Firmicutes	Clostridia	Clostridiales	Ruminococcaceae	Anaerotruncus	Anaerotruncus sp. G3(2012)
FGCQFFPGEKPWGQK	2684.8	Anaerotruncus sp. G3(2012)	Species	Bacteria		Firmicutes	Clostridia	Clostridiales	Ruminococcaceae	Anaerotruncus	Anaerotruncus sp. G3(2012)
FLAFEQSFK	103942	Bacteria	Superkingdom	Bacteria
VDVIMPCATQNDVNMEQAEK	337980	Anaerotruncus sp. G3(2012)	Species	Bacteria		Firmicutes	Clostridia	Clostridiales	Ruminococcaceae	Anaerotruncus	Anaerotruncus sp. G3(2012)
VTWTDDAGK	247115	Anaerotruncus sp. G3(2012)	Species	Bacteria		Firmicutes	Clostridia	Clostridiales	Ruminococcaceae	Anaerotruncus	Anaerotruncus sp. G3(2012)
FLMLSNEVPILDAK	28432	Lachnospiraceae bacterium A4	Species	Bacteria		Firmicutes	Clostridia	Clostridiales	Lachnospiraceae		Lachnospiraceae bacterium A4
FGSLFDATQTMVSPLPDGK	297827	Firmicutes	Phylum	Bacteria		Firmicutes
SVTKEEINAAMK	1757030	Bacteria	Superkingdom	Bacteria
VPTPTGSTTLLFAVVNK	173525	Butyrivibrio	Genus	Bacteria		Firmicutes	Clostridia	Clostridiales	Lachnospiraceae	Butyrivibrio
QMFGAEGYEVVAINDLTSPK	1.59663e+06	Bacteria	Superkingdom	Bacteria
ASAHITAGAK	132540	Bacteria	Superkingdom	Bacteria
AAAINIVPNSTGAAK	557650	Bacteria	Superkingdom	Bacteria
VVISAPAGNDLPTIVYNVNHETLKK	102963	Firmicutes	Phylum	Bacteria		Firmicutes
KVVISAPAGNDLPTIVYNVNHETLK	31024	Firmicutes	Phylum	Bacteria		Firmicutes
VVISAPAGNDLPTIVYNVNHETLK	217400	Firmicutes	Phylum	Bacteria		Firmicutes
EEINAAMK	1127550	Bacteria	Superkingdom	Bacteria
NVYSGPYVLTSSANQK	87885	Dorea sp. 5-2	Species	Bacteria		Firmicutes	Clostridia	Clostridiales	Lachnospiraceae	Dorea	Dorea sp. 5-2
EMLNILNK	54165.5	Clostridiales	Order	Bacteria		Firmicutes	Clostridia	Clostridiales
AYIYAIPYEYYEK	58974	Clostridium	Genus	Bacteria		Firmicutes	Clostridia	Clostridiales	Clostridiaceae	Clostridium
ILIINAGSSSLK	97874	Lactobacillus malefermentans	Species	Bacteria		Firmicutes	Bacilli	Lactobacillales	Lactobacillaceae	Lactobacillus	Lactobacillus malefermentans
STDEIAAVGHR	199693	Bacteria	Superkingdom	Bacteria
SQIEETTSDFDKEK	1.11673e+06	Firmicutes	Phylum	Bacteria		Firmicutes
AGILDPVK	137467	Bacteria	Superkingdom	Bacteria
VMTDDIIR	788220	Selenomonas infelix	Species	Bacteria		Firmicutes	Negativicutes	Selenomonadales	Selenomonadaceae	Selenomonas	Selenomonas infelix
AYQEAQIYGEAVK	134010	Roseburia hominis	Species	Bacteria		Firmicutes	Clostridia	Clostridiales	Lachnospiraceae	Roseburia	Roseburia hominis
ILYDFLDQSK	229118	Firmicutes	Phylum	Bacteria		Firmicutes
SLMNVPFVTGDKDLDAK	424970	Firmicutes	Phylum	Bacteria		Firmicutes
DSNMALTLIK	84975	Clostridiales	Order	Bacteria		Firmicutes	Clostridia	Clostridiales
MYESENAYTK	149490	Clostridiales	Order	Bacteria		Firmicutes	Clostridia	Clostridiales
DSLVEQIAVIGENLK	65220	Eubacterium plexicaudatum	Species	Bacteria		Firmicutes	Clostridia	Clostridiales	Eubacteriaceae	Eubacterium	Eubacterium plexicaudatum
VVVEDDKR	17240	Eubacterium plexicaudatum	Species	Bacteria		Firmicutes	Clostridia	Clostridiales	Eubacteriaceae	Eubacterium	Eubacterium plexicaudatum
FVCSVCGYVHEGDSAPEK	101344	Clostridiales	Order	Bacteria		Firmicutes	Clostridia	Clostridiales
AIPFEPYAK	26225	Firmicutes	Phylum	Bacteria		Firmicutes
ALDEAIAFVK	307303	Firmicutes	Phylum	Bacteria		Firmicutes
AYCIFEGTNQIQK	261875	Firmicutes	Phylum	Bacteria		Firmicutes
GYAAFALTEPQSGSDASNVK	535823	Firmicutes	Phylum	Bacteria		Firmicutes
LGLNSFEIPK	214005	Firmicutes	Phylum	Bacteria		Firmicutes
QGIQWMIADMATK	156260	Firmicutes	Phylum	Bacteria		Firmicutes
RALDEAIAFVK	103262	Firmicutes	Phylum	Bacteria		Firmicutes
GLWQITTIPK	218217	Eubacterium plexicaudatum	Species	Bacteria		Firmicutes	Clostridia	Clostridiales	Eubacteriaceae	Eubacterium	Eubacterium plexicaudatum
LTTCANAGDYSTMPDIVLMQDNSYQK	5001.7	Eubacterium plexicaudatum	Species	Bacteria		Firmicutes	Clostridia	Clostridiales	Eubacteriaceae	Eubacterium	Eubacterium plexicaudatum
LVNNWDEYVK	22953	Eubacterium plexicaudatum	Species	Bacteria		Firmicutes	Clostridia	Clostridiales	Eubacteriaceae	Eubacterium	Eubacterium plexicaudatum
TAAALDSIR	398913	Ochrobactrum sp. EGD-AQ16	Species	Bacteria		Proteobacteria	Alphaproteobacteria	Rhizobiales	Brucellaceae	Ochrobactrum	Ochrobactrum sp. EGD-AQ16
MFGFAYGEK	60388	Firmicutes	Phylum	Bacteria		Firmicutes
DAQYVDEDGNPNINTK	29510	Dorea sp. 5-2	Species	Bacteria		Firmicutes	Clostridia	Clostridiales	Lachnospiraceae	Dorea	Dorea sp. 5-2
VLLMDEPLSNLDAK	1.76523e+06	Bacteria	Superkingdom	Bacteria
FQNTQFQLADLQTR	239483	Bacteria	Superkingdom	Bacteria
HLGAFGLTEPAAGTDASGQQTK	218257	Anaerotruncus sp. G3(2012)	Species	Bacteria		Firmicutes	Clostridia	Clostridiales	Ruminococcaceae	Anaerotruncus	Anaerotruncus sp. G3(2012)
FLDPPLHEFVPTDEEDIEK	684680	Eubacterium plexicaudatum	Species	Bacteria		Firmicutes	Clostridia	Clostridiales	Eubacteriaceae	Eubacterium	Eubacterium plexicaudatum
TNADTPTDAK	6655.2	Bacteria	Superkingdom	Bacteria
QLGVTTGAQAK	1860100	Roseburia hominis	Species	Bacteria		Firmicutes	Clostridia	Clostridiales	Lachnospiraceae	Roseburia	Roseburia hominis
FVCTVCGYVHEGDSAPEK	91888	Lachnospiraceae bacterium M18-1	Species	Bacteria		Firmicutes	Clostridia	Clostridiales	Lachnospiraceae		Lachnospiraceae bacterium M18-1
CPQCGVGADK	122187	Bacteria	Superkingdom	Bacteria
ANFEGECTEVGMYLAMAR	177005	Bacteria	Superkingdom	Bacteria
GKMEQAAADAILAK	216037	Bacteria	Superkingdom	Bacteria
MEQAAADAILAK	757622	Bacteria	Superkingdom	Bacteria
ELQDICKK	3910.2	Clostridiales	Order	Bacteria		Firmicutes	Clostridia	Clostridiales
ECVTLCGPR	100494	Dorea sp. 5-2	Species	Bacteria		Firmicutes	Clostridia	Clostridiales	Lachnospiraceae	Dorea	Dorea sp. 5-2
EGVIVAQR	144350	Bacteria	Superkingdom	Bacteria
AAMLAIMNPDDK	586085	Firmicutes	Phylum	Bacteria		Firmicutes
AAMLAIMNPDDKAGLEAALR	189173	Firmicutes	Phylum	Bacteria		Firmicutes
DLDDANIGLNGSPTK	145522	Eubacterium plexicaudatum	Species	Bacteria		Firmicutes	Clostridia	Clostridiales	Eubacteriaceae	Eubacterium	Eubacterium plexicaudatum
DLKDLDDANIGLNGSPTK	178220	Eubacterium plexicaudatum	Species	Bacteria		Firmicutes	Clostridia	Clostridiales	Eubacteriaceae	Eubacterium	Eubacterium plexicaudatum
VLGGADTWATSSTIAGALR	693243	Clostridiales	Order	Bacteria		Firmicutes	Clostridia	Clostridiales
VTLDATESVAYIMGK	190810	Eubacterium plexicaudatum	Species	Bacteria		Firmicutes	Clostridia	Clostridiales	Eubacteriaceae	Eubacterium	Eubacterium plexicaudatum
YMTPGGIFDAYDEK	186463	Eubacterium plexicaudatum	Species	Bacteria		Firmicutes	Clostridia	Clostridiales	Eubacteriaceae	Eubacterium	Eubacterium plexicaudatum
YMTPGGIFDAYDEKEVTVWGR	22433	Eubacterium plexicaudatum	Species	Bacteria		Firmicutes	Clostridia	Clostridiales	Eubacteriaceae	Eubacterium	Eubacterium plexicaudatum
MPCLVTALSELNVPR	233487	Eubacterium plexicaudatum	Species	Bacteria		Firmicutes	Clostridia	Clostridiales	Eubacteriaceae	Eubacterium	Eubacterium plexicaudatum
LYRPWVPEAFTK	297417	Eubacterium plexicaudatum	Species	Bacteria		Firmicutes	Clostridia	Clostridiales	Eubacteriaceae	Eubacterium	Eubacterium plexicaudatum
AGADATNDLTYLLMDAVR	91368	Collinsella tanakaei	Species	Bacteria		Actinobacteria	Coriobacteriia	Coriobacteriales	Coriobacteriaceae	Collinsella	Collinsella tanakaei
AWLPLSDGISPTQGADYK	230775	Dorea sp. 5-2	Species	Bacteria		Firmicutes	Clostridia	Clostridiales	Lachnospiraceae	Dorea	Dorea sp. 5-2
DQDPFYISPEDKK	270760	Dorea sp. 5-2	Species	Bacteria		Firmicutes	Clostridia	Clostridiales	Lachnospiraceae	Dorea	Dorea sp. 5-2
EVLFPFWEGK	203187	Bacteria	Superkingdom	Bacteria
KAWLPLSDGISPTQGADYK	176705	Dorea sp. 5-2	Species	Bacteria		Firmicutes	Clostridia	Clostridiales	Lachnospiraceae	Dorea	Dorea sp. 5-2
MFQGMSEQITK	252835	Dorea sp. 5-2	Species	Bacteria		Firmicutes	Clostridia	Clostridiales	Lachnospiraceae	Dorea	Dorea sp. 5-2
MSEMMWVTSEGGSK	120473	Clostridiales	Order	Bacteria		Firmicutes	Clostridia	Clostridiales
QVTPDEGPLTQYQTFEQFDR	203197	Dorea sp. 5-2	Species	Bacteria		Firmicutes	Clostridia	Clostridiales	Lachnospiraceae	Dorea	Dorea sp. 5-2
SVDEYCEGQYR	141790	Bacteria	Superkingdom	Bacteria
WMQDELDTIETR	261879	Dorea sp. 5-2	Species	Bacteria		Firmicutes	Clostridia	Clostridiales	Lachnospiraceae	Dorea	Dorea sp. 5-2
AGMGFPACHFDDTHIK	165450	Firmicutes	Phylum	Bacteria		Firmicutes
GMIDIQNEAR	33575	Dorea sp. 5-2	Species	Bacteria		Firmicutes	Clostridia	Clostridiales	Lachnospiraceae	Dorea	Dorea sp. 5-2
IYKENPGMPK	60460.7	Dorea sp. 5-2	Species	Bacteria		Firmicutes	Clostridia	Clostridiales	Lachnospiraceae	Dorea	Dorea sp. 5-2
IYQPSLACR	255376	Bacteria	Superkingdom	Bacteria
KGMIDIQNEAR	39760.7	Dorea sp. 5-2	Species	Bacteria		Firmicutes	Clostridia	Clostridiales	Lachnospiraceae	Dorea	Dorea sp. 5-2
WTDVMTVISQR	293820	Dorea sp. 5-2	Species	Bacteria		Firmicutes	Clostridia	Clostridiales	Lachnospiraceae	Dorea	Dorea sp. 5-2
YCCETAPLVIQENELIVGNPTGAPR	47975.7	Dorea sp. 5-2	Species	Bacteria		Firmicutes	Clostridia	Clostridiales	Lachnospiraceae	Dorea	Dorea sp. 5-2
EWVVIDATDQVLGR	108010	Bacteria	Superkingdom	Bacteria
ACTQDLNVMQYIAYAQR	157098	Firmicutes	Phylum	Bacteria		Firmicutes
CAEESFDCIGCGCCTVR	43929.5	Dorea	Genus	Bacteria		Firmicutes	Clostridia	Clostridiales	Lachnospiraceae	Dorea
NVVSATIEGLSR	63782	Firmicutes	Phylum	Bacteria		Firmicutes
VVAYFQK	447090	Chitinophaga	Genus	Bacteria		Bacteroidetes	Chitinophagia	Chitinophagales	Chitinophagaceae	Chitinophaga
ADIFAAGDKVDATAISK	449940	Clostridiales	Order	Bacteria		Firmicutes	Clostridia	Clostridiales
VDAENNLLLIK	461865	Bacteria	Superkingdom	Bacteria
FDNAADYK	156677	Eubacterium plexicaudatum	Species	Bacteria		Firmicutes	Clostridia	Clostridiales	Eubacteriaceae	Eubacterium	Eubacterium plexicaudatum
LHIDAGK	1.47763e+06	Bacteria	Superkingdom	Bacteria
SITHDILGK	177217	Eubacterium plexicaudatum	Species	Bacteria		Firmicutes	Clostridia	Clostridiales	Eubacteriaceae	Eubacterium	Eubacterium plexicaudatum
HTGASVLLK	280797	Clostridiales	Order	Bacteria		Firmicutes	Clostridia	Clostridiales
AAEIPEAIR	421097	Bacteria	Superkingdom	Bacteria
AAEIPEAIRK	326730	Bacteria	Superkingdom	Bacteria
EIIDASQLELTENVVAIK	15138.5	Eubacterium plexicaudatum	Species	Bacteria		Firmicutes	Clostridia	Clostridiales	Eubacteriaceae	Eubacterium	Eubacterium plexicaudatum
SPDGTGIIAGGPAR	1.0106e+06	Firmicutes	Phylum	Bacteria		Firmicutes
NEDYQPSEGAASGLAGDK	31706.7	Dorea sp. 5-2	Species	Bacteria		Firmicutes	Clostridia	Clostridiales	Lachnospiraceae	Dorea	Dorea sp. 5-2
QMFNAEGYEVVAINDLTSPK	877667	Firmicutes	Phylum	Bacteria		Firmicutes
IYKEPDANNCPWGELK	1.23877e+06	Lachnospiraceae bacterium MD335	Species	Bacteria		Firmicutes	Clostridia	Clostridiales	Lachnospiraceae		Lachnospiraceae bacterium MD335
ASDTIISAASCTTNCLAPMAK	711883	Lachnospiraceae bacterium MD335	Species	Bacteria		Firmicutes	Clostridia	Clostridiales	Lachnospiraceae		Lachnospiraceae bacterium MD335
IEVIDYEDIRK	66653	Bilophila	Genus	Bacteria		Proteobacteria	Deltaproteobacteria	Desulfovibrionales	Desulfovibrionaceae	Bilophila
ALNLSPAAMGYAK	99158	Firmicutes	Phylum	Bacteria		Firmicutes
LVDLVNNVLDPVDR	152780	Firmicutes bacterium ASF500	Species	Bacteria		Firmicutes					Firmicutes bacterium ASF500
GQDIVDMNHK	107702	Bacteria	Superkingdom	Bacteria
KGQDIVDMNHK	131537	Bacteria	Superkingdom	Bacteria
ASNIGQVAQFAAAGK	602136	Bacteria	Superkingdom	Bacteria
AVECGYWNLFR	63884.5	Bacteria	Superkingdom	Bacteria
DAATHSYLK	748110	Bacteria	Superkingdom	Bacteria
SVTIQYGGSMNAK	182843	Clostridiales	Order	Bacteria		Firmicutes	Clostridia	Clostridiales
AFAEEIKPIMPK	61207.3	Firmicutes	Phylum	Bacteria		Firmicutes
TATAEQAGEVCQAIR	208420	Firmicutes	Phylum	Bacteria		Firmicutes
MNNTLSQTK	4357.7	Firmicutes	Phylum	Bacteria		Firmicutes
TIIAGNWK	178097	Bacteria	Superkingdom	Bacteria
QYYNETDFTVNKK	154060	Firmicutes	Phylum	Bacteria		Firmicutes
GMTGTNLMTMLESR	188837	Roseburia	Genus	Bacteria		Firmicutes	Clostridia	Clostridiales	Lachnospiraceae	Roseburia
DHVSTTVSPMCGVSR	76101.5	Eubacterium plexicaudatum	Species	Bacteria		Firmicutes	Clostridia	Clostridiales	Eubacteriaceae	Eubacterium	Eubacterium plexicaudatum
IEGNADAVLTYSEIR	6422.3	Clostridiales	Order	Bacteria		Firmicutes	Clostridia	Clostridiales
DLTDEEVKR	500095	Clostridiales	Order	Bacteria		Firmicutes	Clostridia	Clostridiales
VTEIDALGAR	137855	Lachnospiraceae bacterium A4	Species	Bacteria		Firmicutes	Clostridia	Clostridiales	Lachnospiraceae		Lachnospiraceae bacterium A4
IFTVTGDAVSDPR	162178	Eubacterium plexicaudatum	Species	Bacteria		Firmicutes	Clostridia	Clostridiales	Eubacteriaceae	Eubacterium	Eubacterium plexicaudatum
DPTIPPIVK	101479	Firmicutes	Phylum	Bacteria		Firmicutes
AGAGVNNIPLEK	163899	Bacteria	Superkingdom	Bacteria
SRGEYAYTLMDIEK	53824	Lachnospiraceae bacterium A4	Species	Bacteria		Firmicutes	Clostridia	Clostridiales	Lachnospiraceae		Lachnospiraceae bacterium A4
AMADAAQFPILDANILSR	199777	Lachnospiraceae bacterium MD335	Species	Bacteria		Firmicutes	Clostridia	Clostridiales	Lachnospiraceae		Lachnospiraceae bacterium MD335
EAYAGTFATTTSLLDGTR	106860	Lachnospiraceae bacterium MD335	Species	Bacteria		Firmicutes	Clostridia	Clostridiales	Lachnospiraceae		Lachnospiraceae bacterium MD335
ETNLGDFSADAYK	71714.7	Lachnospiraceae bacterium MD335	Species	Bacteria		Firmicutes	Clostridia	Clostridiales	Lachnospiraceae		Lachnospiraceae bacterium MD335
IVSTGSYLEK	285725	Lachnospiraceae bacterium MD335	Species	Bacteria		Firmicutes	Clostridia	Clostridiales	Lachnospiraceae		Lachnospiraceae bacterium MD335
YENNEESLGMSSVAALK	58474	Lachnospiraceae bacterium MD335	Species	Bacteria		Firmicutes	Clostridia	Clostridiales	Lachnospiraceae		Lachnospiraceae bacterium MD335
AVAEETAADYFYMFDAIK	35924	Lachnospiraceae bacterium MD335	Species	Bacteria		Firmicutes	Clostridia	Clostridiales	Lachnospiraceae		Lachnospiraceae bacterium MD335
SDLFADKTPAQANAMR	238460	Lachnospiraceae bacterium MD335	Species	Bacteria		Firmicutes	Clostridia	Clostridiales	Lachnospiraceae		Lachnospiraceae bacterium MD335
YWMFAETEGDTLR	66731	Lachnospiraceae bacterium MD335	Species	Bacteria		Firmicutes	Clostridia	Clostridiales	Lachnospiraceae		Lachnospiraceae bacterium MD335
DAEMTEDQVGELK	47570	Lachnospiraceae bacterium MD335	Species	Bacteria		Firmicutes	Clostridia	Clostridiales	Lachnospiraceae		Lachnospiraceae bacterium MD335
LIDWMVSEFK	51141	Lachnospiraceae bacterium MD335	Species	Bacteria		Firmicutes	Clostridia	Clostridiales	Lachnospiraceae		Lachnospiraceae bacterium MD335
TAIPVQNALR	71858.3	Clostridiales	Order	Bacteria		Firmicutes	Clostridia	Clostridiales
GQNILGYR	520860	Bacteria	Superkingdom	Bacteria
SIANGIDIIR	573643	Bacteria	Superkingdom	Bacteria
DMAGLLVPYK	265030	Firmicutes	Phylum	Bacteria		Firmicutes
DSHQSLIATR	173107	Clostridiales	Order	Bacteria		Firmicutes	Clostridia	Clostridiales
EQNAEDKYYDVLQEIPR	189220	Lachnoclostridium	Genus	Bacteria		Firmicutes	Clostridia	Clostridiales	Lachnospiraceae	Lachnoclostridium
HYADDVVTEFVEK	674360	Roseburia	Genus	Bacteria		Firmicutes	Clostridia	Clostridiales	Lachnospiraceae	Roseburia
IFDCFNDLR	216210	Clostridiales	Order	Bacteria		Firmicutes	Clostridia	Clostridiales
TLMYQVPGGMLSNMVSQLK	39620.3	Firmicutes	Phylum	Bacteria		Firmicutes
GTPYDTGFDQNLLAK	263030	Lachnospiraceae bacterium A4	Species	Bacteria		Firmicutes	Clostridia	Clostridiales	Lachnospiraceae		Lachnospiraceae bacterium A4
FAEILGEDLEPNMK	767310	Lachnospiraceae bacterium MD335	Species	Bacteria		Firmicutes	Clostridia	Clostridiales	Lachnospiraceae		Lachnospiraceae bacterium MD335
NNAEISDADKQYIFDQLK	314013	Lachnospiraceae bacterium MD335	Species	Bacteria		Firmicutes	Clostridia	Clostridiales	Lachnospiraceae		Lachnospiraceae bacterium MD335
VECEFGATNGK	99602	Lachnospiraceae bacterium MD335	Species	Bacteria		Firmicutes	Clostridia	Clostridiales	Lachnospiraceae		Lachnospiraceae bacterium MD335
ALTDAGMEVEQLDLQR	625633	Clostridiales	Order	Bacteria		Firmicutes	Clostridia	Clostridiales
GYTVTFMDGK	178702	Lachnospiraceae bacterium MD335	Species	Bacteria		Firmicutes	Clostridia	Clostridiales	Lachnospiraceae		Lachnospiraceae bacterium MD335
VTPDNVADFQ	169043	Lachnospiraceae bacterium MD335	Species	Bacteria		Firmicutes	Clostridia	Clostridiales	Lachnospiraceae		Lachnospiraceae bacterium MD335
DADIPTVLINREPTAEQMSAYEK	98137.7	Lachnospiraceae bacterium MD335	Species	Bacteria		Firmicutes	Clostridia	Clostridiales	Lachnospiraceae		Lachnospiraceae bacterium MD335
EPTAEQMSAYEK	411210	Lachnospiraceae bacterium MD335	Species	Bacteria		Firmicutes	Clostridia	Clostridiales	Lachnospiraceae		Lachnospiraceae bacterium MD335
DADIPTVLINR	488483	Lachnospiraceae bacterium MD335	Species	Bacteria		Firmicutes	Clostridia	Clostridiales	Lachnospiraceae		Lachnospiraceae bacterium MD335
TYASGEQSIYVDYVK	414520	Lachnospiraceae bacterium MD335	Species	Bacteria		Firmicutes	Clostridia	Clostridiales	Lachnospiraceae		Lachnospiraceae bacterium MD335
LVYVGCDAR	996133	Lachnospiraceae bacterium MD335	Species	Bacteria		Firmicutes	Clostridia	Clostridiales	Lachnospiraceae		Lachnospiraceae bacterium MD335
NALQEILEGK	1145700	Clostridiales	Order	Bacteria		Firmicutes	Clostridia	Clostridiales
FDDAFMTTYR	783287	Firmicutes	Phylum	Bacteria		Firmicutes
VSYIMIQGDPENVDAQYR	597783	Clostridiales	Order	Bacteria		Firmicutes	Clostridia	Clostridiales
EYLLSDGSK	155830	Blautia hydrogenotrophica	Species	Bacteria		Firmicutes	Clostridia	Clostridiales	Lachnospiraceae	Blautia	Blautia hydrogenotrophica
TADYPTGCADNK	236060	Coprococcus catus	Species	Bacteria		Firmicutes	Clostridia	Clostridiales	Lachnospiraceae	Coprococcus	Coprococcus catus
AYYPISEIGAGKPGFSK	418617	Clostridiales	Order	Bacteria		Firmicutes	Clostridia	Clostridiales
AMAQFADTR	182090	Lachnospiraceae bacterium A4	Species	Bacteria		Firmicutes	Clostridia	Clostridiales	Lachnospiraceae		Lachnospiraceae bacterium A4
QLAEQSANSAAETR	164043	Lachnospiraceae bacterium A4	Species	Bacteria		Firmicutes	Clostridia	Clostridiales	Lachnospiraceae		Lachnospiraceae bacterium A4
KLASEHSSEK	70221	Lachnospiraceae bacterium MD335	Species	Bacteria		Firmicutes	Clostridia	Clostridiales	Lachnospiraceae		Lachnospiraceae bacterium MD335
IITDETKK	9594.6	Bacteria	Superkingdom	Bacteria
NLAAGANPIDLR	206673	Enterocloster clostridioformis	Species	Bacteria		Firmicutes	Clostridia	Clostridiales	Lachnospiraceae	Enterocloster	Enterocloster clostridioformis
VAAISAGDEEVGNMVADAMEK	44736.3	Bacteria	Superkingdom	Bacteria
KTLEAGVNK	201177	Lachnospiraceae bacterium MD335	Species	Bacteria		Firmicutes	Clostridia	Clostridiales	Lachnospiraceae		Lachnospiraceae bacterium MD335
ENTIIVDGEGDK	29593	Firmicutes	Phylum	Bacteria		Firmicutes
ENTIIVDGEGDKAAIDAR	908477	Lachnospiraceae	Family	Bacteria		Firmicutes	Clostridia	Clostridiales	Lachnospiraceae
EEYVNMVEAGILDPAK	47970.2	Clostridiales	Order	Bacteria		Firmicutes	Clostridia	Clostridiales
EDTPAMPAGGPGMGGMM	52635	Lachnospiraceae bacterium A4	Species	Bacteria		Firmicutes	Clostridia	Clostridiales	Lachnospiraceae		Lachnospiraceae bacterium A4
ISNIQEILPVLEQVVQSGAK	45675	Lachnospiraceae bacterium A4	Species	Bacteria		Firmicutes	Clostridia	Clostridiales	Lachnospiraceae		Lachnospiraceae bacterium A4
QVEETTSDFDK	40890	Lachnospiraceae bacterium A4	Species	Bacteria		Firmicutes	Clostridia	Clostridiales	Lachnospiraceae		Lachnospiraceae bacterium A4
QVEETTSDFDKEK	510870	Lachnospiraceae bacterium A4	Species	Bacteria		Firmicutes	Clostridia	Clostridiales	Lachnospiraceae		Lachnospiraceae bacterium A4
KAPEGTGIIAGGPAR	344826	Firmicutes	Phylum	Bacteria		Firmicutes
TIIDASQLELTDK	653537	Lachnospiraceae bacterium A4	Species	Bacteria		Firmicutes	Clostridia	Clostridiales	Lachnospiraceae		Lachnospiraceae bacterium A4
TIIDASQLELTDKVVTIK	90788.3	Lachnospiraceae bacterium A4	Species	Bacteria		Firmicutes	Clostridia	Clostridiales	Lachnospiraceae		Lachnospiraceae bacterium A4
AVEIPEAIR	1.25763e+06	Firmicutes	Phylum	Bacteria		Firmicutes
AVEIPEAIRK	489560	Firmicutes	Phylum	Bacteria		Firmicutes
QNVVLSTIAGLSQLK	153693	Lachnospiraceae	Family	Bacteria		Firmicutes	Clostridia	Clostridiales	Lachnospiraceae
TPEQVAANR	203201	Lachnospiraceae	Family	Bacteria		Firmicutes	Clostridia	Clostridiales	Lachnospiraceae
SITHDFIGNYGSSSVLLK	572580	Lachnospiraceae bacterium MD335	Species	Bacteria		Firmicutes	Clostridia	Clostridiales	Lachnospiraceae		Lachnospiraceae bacterium MD335
EFQETMGQK	461830	Lachnospiraceae bacterium A4	Species	Bacteria		Firmicutes	Clostridia	Clostridiales	Lachnospiraceae		Lachnospiraceae bacterium A4
MIGQFDALVAEK	452170	Trichococcus	Genus	Bacteria		Firmicutes	Bacilli	Lactobacillales	Carnobacteriaceae	Trichococcus
VDMNELYGTLYR	252267	Lachnospiraceae bacterium A4	Species	Bacteria		Firmicutes	Clostridia	Clostridiales	Lachnospiraceae		Lachnospiraceae bacterium A4
VLGVGEASGMFPIDIDTK	200470	Clostridiales	Order	Bacteria		Firmicutes	Clostridia	Clostridiales
FTLANFMR	3595.8	Bacteria	Superkingdom	Bacteria
NTITQEASEK	291317	Clostridiales	Order	Bacteria		Firmicutes	Clostridia	Clostridiales
ITQDKADAIAAK	140753	Lachnospiraceae bacterium MD335	Species	Bacteria		Firmicutes	Clostridia	Clostridiales	Lachnospiraceae		Lachnospiraceae bacterium MD335
EIGKTPVEVK	106483	Clostridiales	Order	Bacteria		Firmicutes	Clostridia	Clostridiales
AGSTIEALAK	660020	Lysobacter arseniciresistens	Species	Bacteria		Proteobacteria	Gammaproteobacteria	Xanthomonadales	Xanthomonadaceae	Lysobacter	Lysobacter arseniciresistens
SALGAVQNR	7.69487e+06	Bacteria	Superkingdom	Bacteria
MNELAVQAANGTNSVTDR	1.19387e+06	Lachnospiraceae bacterium A4	Species	Bacteria		Firmicutes	Clostridia	Clostridiales	Lachnospiraceae		Lachnospiraceae bacterium A4
MLGVTQK	543525	Sphingobium sp. (strain NBRC 103272 / SYK-6)	Species	Bacteria		Proteobacteria	Alphaproteobacteria	Sphingomonadales	Sphingomonadaceae	Sphingobium	Sphingobium sp. (strain NBRC 103272 / SYK-6)
AVLYDGSYHPVDSSEMAFK	585953	Firmicutes	Phylum	Bacteria		Firmicutes
MATIQAFK	199260	Firmicutes	Phylum	Bacteria		Firmicutes
DTLMEAVAETSEEFMER	23585	Firmicutes	Phylum	Bacteria		Firmicutes
MNVYTTDK	328300	Clostridiales	Order	Bacteria		Firmicutes	Clostridia	Clostridiales
VEDGNTVSDFGK	16408.5	Lachnospiraceae bacterium MD335	Species	Bacteria		Firmicutes	Clostridia	Clostridiales	Lachnospiraceae		Lachnospiraceae bacterium MD335
VEDGNTVSDFGKEEQK	68544.3	Lachnospiraceae bacterium MD335	Species	Bacteria		Firmicutes	Clostridia	Clostridiales	Lachnospiraceae		Lachnospiraceae bacterium MD335
YFGGETFTENEIR	68922.7	Lachnospiraceae bacterium MD335	Species	Bacteria		Firmicutes	Clostridia	Clostridiales	Lachnospiraceae		Lachnospiraceae bacterium MD335
DAGLTSSEIGQVLLVGGSTR	191850	Lachnospiraceae bacterium A4	Species	Bacteria		Firmicutes	Clostridia	Clostridiales	Lachnospiraceae		Lachnospiraceae bacterium A4
GTANAIYQNINFIER	611670	Clostridiales	Order	Bacteria		Firmicutes	Clostridia	Clostridiales
LYTLTQK	276500	Bacteria	Superkingdom	Bacteria
HCIIAENVVIEK	129170	Lachnospiraceae	Family	Bacteria		Firmicutes	Clostridia	Clostridiales	Lachnospiraceae
HSVLFAGVK	241063	Lachnospiraceae bacterium A4	Species	Bacteria		Firmicutes	Clostridia	Clostridiales	Lachnospiraceae		Lachnospiraceae bacterium A4
FGLMVADENDKITEFQEKPK	247713	Clostridiales	Order	Bacteria		Firmicutes	Clostridia	Clostridiales
SLQENVVLER	311085	Lachnospiraceae bacterium A4	Species	Bacteria		Firmicutes	Clostridia	Clostridiales	Lachnospiraceae		Lachnospiraceae bacterium A4
EVATYDLKPEMSAYTVCDK	59027.3	Lachnospiraceae bacterium A4	Species	Bacteria		Firmicutes	Clostridia	Clostridiales	Lachnospiraceae		Lachnospiraceae bacterium A4
YVCFSDYDPTIPNK	257183	Lachnospiraceae bacterium A4	Species	Bacteria		Firmicutes	Clostridia	Clostridiales	Lachnospiraceae		Lachnospiraceae bacterium A4
IIAVEPASCPSLTR	342837	Firmicutes	Phylum	Bacteria		Firmicutes
VSYEQKPFR	34874	Bacteria	Superkingdom	Bacteria
CEIELSDPK	104601	Lachnospiraceae bacterium A4	Species	Bacteria		Firmicutes	Clostridia	Clostridiales	Lachnospiraceae		Lachnospiraceae bacterium A4
DTLMEAVAETSEEFMDR	51855	Lachnospiraceae bacterium A4	Species	Bacteria		Firmicutes	Clostridia	Clostridiales	Lachnospiraceae		Lachnospiraceae bacterium A4
FEISKPYTAK	105069	Lachnospiraceae bacterium A4	Species	Bacteria		Firmicutes	Clostridia	Clostridiales	Lachnospiraceae		Lachnospiraceae bacterium A4
FEPSGDLEK	129410	Lachnospiraceae bacterium A4	Species	Bacteria		Firmicutes	Clostridia	Clostridiales	Lachnospiraceae		Lachnospiraceae bacterium A4
GILYDGSYHAVDSSEMAFK	182365	Lachnospiraceae bacterium A4	Species	Bacteria		Firmicutes	Clostridia	Clostridiales	Lachnospiraceae		Lachnospiraceae bacterium A4
GSFEYEVTR	75068	Lachnospiraceae bacterium A4	Species	Bacteria		Firmicutes	Clostridia	Clostridiales	Lachnospiraceae		Lachnospiraceae bacterium A4
ISISTSVVPIEWDGVK	79588	Lachnospiraceae bacterium A4	Species	Bacteria		Firmicutes	Clostridia	Clostridiales	Lachnospiraceae		Lachnospiraceae bacterium A4
MNIYTTDK	185940	Firmicutes	Phylum	Bacteria		Firmicutes
MRFEPSGDLEK	44446	Lachnospiraceae bacterium A4	Species	Bacteria		Firmicutes	Clostridia	Clostridiales	Lachnospiraceae		Lachnospiraceae bacterium A4
MSHEDQTLK	55888	Lachnospiraceae bacterium A4	Species	Bacteria		Firmicutes	Clostridia	Clostridiales	Lachnospiraceae		Lachnospiraceae bacterium A4
QTLLYGIGDQQLEIIQSR	24898.5	Lachnospiraceae bacterium A4	Species	Bacteria		Firmicutes	Clostridia	Clostridiales	Lachnospiraceae		Lachnospiraceae bacterium A4
TSLVESMAYLSGITSR	142160	Lachnospiraceae bacterium A4	Species	Bacteria		Firmicutes	Clostridia	Clostridiales	Lachnospiraceae		Lachnospiraceae bacterium A4
VEDGNTVSDYGK	39273.8	Lachnospiraceae bacterium A4	Species	Bacteria		Firmicutes	Clostridia	Clostridiales	Lachnospiraceae		Lachnospiraceae bacterium A4
VVNDVENR	89861	Herbinix	Genus	Bacteria		Firmicutes	Clostridia	Clostridiales	Lachnospiraceae	Herbinix
YEQTPNDIQDAQVK	133700	Lachnospiraceae bacterium A4	Species	Bacteria		Firmicutes	Clostridia	Clostridiales	Lachnospiraceae		Lachnospiraceae bacterium A4
YFGGETFSENEIR	213577	Lachnospiraceae bacterium A4	Species	Bacteria		Firmicutes	Clostridia	Clostridiales	Lachnospiraceae		Lachnospiraceae bacterium A4
TIVDPFIGK	185493	Firmicutes	Phylum	Bacteria		Firmicutes
ATVIEYGK	22734.5	Lachnospiraceae	Family	Bacteria		Firmicutes	Clostridia	Clostridiales	Lachnospiraceae
GPLAAYPVVGVK	592873	Firmicutes	Phylum	Bacteria		Firmicutes
NYFPAVEK	810783	Bacteria	Superkingdom	Bacteria
FVGYVNVVSETGNR	193905	Lachnospiraceae	Family	Bacteria		Firmicutes	Clostridia	Clostridiales	Lachnospiraceae
MIYVTGMDADNASFK	264113	Lachnospiraceae	Family	Bacteria		Firmicutes	Clostridia	Clostridiales	Lachnospiraceae
YMPSPENR	733150	Firmicutes	Phylum	Bacteria		Firmicutes
GVSFMENSAGWHGK	53826	Blautia sp. YL58	Species	Bacteria		Firmicutes	Clostridia	Clostridiales	Lachnospiraceae	Blautia	Blautia sp. YL58
NSVNYPACNMGVCSNVGR	76948.5	Lachnospiraceae bacterium MD335	Species	Bacteria		Firmicutes	Clostridia	Clostridiales	Lachnospiraceae		Lachnospiraceae bacterium MD335
QTGEQIEMNTGK	155450	Lachnospiraceae bacterium A4	Species	Bacteria		Firmicutes	Clostridia	Clostridiales	Lachnospiraceae		Lachnospiraceae bacterium A4
SEITNEWIDESLK	9753.8	Roseburia	Genus	Bacteria		Firmicutes	Clostridia	Clostridiales	Lachnospiraceae	Roseburia
VGVPMNTQYK	278040	Lachnospiraceae	Family	Bacteria		Firmicutes	Clostridia	Clostridiales	Lachnospiraceae
ELDWNLLAKPLNK	32581	Lachnospiraceae bacterium MD335	Species	Bacteria		Firmicutes	Clostridia	Clostridiales	Lachnospiraceae		Lachnospiraceae bacterium MD335
LLFMGQDFAQER	128910	Lachnospiraceae	Family	Bacteria		Firmicutes	Clostridia	Clostridiales	Lachnospiraceae
YGGNENLDAIEFFK	130347	Lachnospiraceae bacterium MD335	Species	Bacteria		Firmicutes	Clostridia	Clostridiales	Lachnospiraceae		Lachnospiraceae bacterium MD335
YGNPDDFR	138170	Lachnospiraceae bacterium MD335	Species	Bacteria		Firmicutes	Clostridia	Clostridiales	Lachnospiraceae		Lachnospiraceae bacterium MD335
LGEHPDWGTK	131033	Firmicutes	Phylum	Bacteria		Firmicutes
VDAVASMLYLDYGK	72830.7	Bacteria	Superkingdom	Bacteria
YLIDLLHK	52396.3	Bacteria	Superkingdom	Bacteria
LDKTNIIHCPIGK	127080	Firmicutes	Phylum	Bacteria		Firmicutes
TNIIHCPIGK	2518.8	Firmicutes	Phylum	Bacteria		Firmicutes
GDKVAEAEAAGADYVGGDELIPK	175497	Clostridium	Genus	Bacteria		Firmicutes	Clostridia	Clostridiales	Clostridiaceae	Clostridium
EYFEEGASNIK	708150	Lachnospiraceae bacterium A4	Species	Bacteria		Firmicutes	Clostridia	Clostridiales	Lachnospiraceae		Lachnospiraceae bacterium A4
EYFEEGASNIKIER	193660	Lachnospiraceae bacterium A4	Species	Bacteria		Firmicutes	Clostridia	Clostridiales	Lachnospiraceae		Lachnospiraceae bacterium A4
ILTLDPVEIK	375110	Lachnospiraceae bacterium A4	Species	Bacteria		Firmicutes	Clostridia	Clostridiales	Lachnospiraceae		Lachnospiraceae bacterium A4
LDGASAVSAVIPAIETK	712273	Lachnospiraceae bacterium A4	Species	Bacteria		Firmicutes	Clostridia	Clostridiales	Lachnospiraceae		Lachnospiraceae bacterium A4
QNTHAPAANAAEDSGIVAIPHLSR	400443	Roseburia	Genus	Bacteria		Firmicutes	Clostridia	Clostridiales	Lachnospiraceae	Roseburia
AGYFTHYAGAGTVR	152093	Clostridiales	Order	Bacteria		Firmicutes	Clostridia	Clostridiales
AIVNDVFEK	1102200	Clostridiales	Order	Bacteria		Firmicutes	Clostridia	Clostridiales
ALGYIEEGYAFSPMFK	129570	Lachnospiraceae bacterium A4	Species	Bacteria		Firmicutes	Clostridia	Clostridiales	Lachnospiraceae		Lachnospiraceae bacterium A4
ALLTESLDIFK	138110	Firmicutes	Phylum	Bacteria		Firmicutes
GVNAGNYNEPECAPWR	305747	Clostridiales	Order	Bacteria		Firmicutes	Clostridia	Clostridiales
KGVNAGNYNEPECAPWR	164507	Clostridiales	Order	Bacteria		Firmicutes	Clostridia	Clostridiales
LIDMTMAEFADYYR	172130	Lachnospiraceae bacterium A4	Species	Bacteria		Firmicutes	Clostridia	Clostridiales	Lachnospiraceae		Lachnospiraceae bacterium A4
LNWPVGIGTPHVQDASYPFLIQEK	6346.3	Lachnospiraceae	Family	Bacteria		Firmicutes	Clostridia	Clostridiales	Lachnospiraceae
WEQPYELLYK	750027	Roseburia	Genus	Bacteria		Firmicutes	Clostridia	Clostridiales	Lachnospiraceae	Roseburia
CAVATCWEEGPK	297910	Firmicutes	Phylum	Bacteria		Firmicutes
DILYGSDK	418743	Firmicutes	Phylum	Bacteria		Firmicutes
CQLCMENEGYAGR	94452	Firmicutes	Phylum	Bacteria		Firmicutes
IIELADVILAK	60666	Lachnospiraceae bacterium A4	Species	Bacteria		Firmicutes	Clostridia	Clostridiales	Lachnospiraceae		Lachnospiraceae bacterium A4
GLADELAAYGADK	614873	Lachnospiraceae	Family	Bacteria		Firmicutes	Clostridia	Clostridiales	Lachnospiraceae
LLDDLAEAIGGTVSCSR	727357	Clostridiales	Order	Bacteria		Firmicutes	Clostridia	Clostridiales
VSGIALELIGEGK	242780	Roseburia	Genus	Bacteria		Firmicutes	Clostridia	Clostridiales	Lachnospiraceae	Roseburia
VSGIALELIGEGKR	138687	Roseburia	Genus	Bacteria		Firmicutes	Clostridia	Clostridiales	Lachnospiraceae	Roseburia
NLTDTVDIMDAK	981177	Lachnospiraceae bacterium A4	Species	Bacteria		Firmicutes	Clostridia	Clostridiales	Lachnospiraceae		Lachnospiraceae bacterium A4
GVFVFAQQVDNK	869850	Firmicutes	Phylum	Bacteria		Firmicutes
DLQVGQTGK	1812600	Bacteria	Superkingdom	Bacteria
VHTGLTADCTSLEIGDFPINPIPGK	61280	Lachnospiraceae	Family	Bacteria		Firmicutes	Clostridia	Clostridiales	Lachnospiraceae
SKDLQVGQTGK	489397	Firmicutes	Phylum	Bacteria		Firmicutes
GVGSPENFK	1006320	Firmicutes	Phylum	Bacteria		Firmicutes
AQAAQYMVYK	692337	Lachnospiraceae bacterium MD335	Species	Bacteria		Firmicutes	Clostridia	Clostridiales	Lachnospiraceae		Lachnospiraceae bacterium MD335
TSYNVEAAMAK	1.06757e+06	Lachnospiraceae	Family	Bacteria		Firmicutes	Clostridia	Clostridiales	Lachnospiraceae
ENMLGQQGK	1.24493e+06	Lachnospiraceae bacterium MD335	Species	Bacteria		Firmicutes	Clostridia	Clostridiales	Lachnospiraceae		Lachnospiraceae bacterium MD335
YLPDLASGKK	272813	Bacteria	Superkingdom	Bacteria
MVISANLLK	99625.7	Bacteria	Superkingdom	Bacteria
CLILTGAGAK	99798	Clostridiales	Order	Bacteria		Firmicutes	Clostridia	Clostridiales
SFVAGADIAEMSTLTK	251480	Bacteria	Superkingdom	Bacteria
AEGEAFGK	35143	Bacteria	Superkingdom	Bacteria
AEGEAFGKK	694947	Bacteria	Superkingdom	Bacteria
NAPIAVR	36054	Bacteria	Superkingdom	Bacteria
QMIYTAR	693197	Firmicutes	Phylum	Bacteria		Firmicutes
LFGDCFETEDQK	803980	Bacteria	Superkingdom	Bacteria
YGMAFFLDK	155375	Firmicutes	Phylum	Bacteria		Firmicutes
AINEGLDVDMDK	244110	Bacteria	Superkingdom	Bacteria
KAINEGLDVDMDK	64410.5	Bacteria	Superkingdom	Bacteria
ICSDNAVFGQPEVGLGITPGFGGTQR	89978	Bacteria	Superkingdom	Bacteria
GIDEYFGLETLK	357967	Lachnospiraceae bacterium A4	Species	Bacteria		Firmicutes	Clostridia	Clostridiales	Lachnospiraceae		Lachnospiraceae bacterium A4
EVNTTDENYYK	4373.7	Lachnospiraceae bacterium A4	Species	Bacteria		Firmicutes	Clostridia	Clostridiales	Lachnospiraceae		Lachnospiraceae bacterium A4
SEMPINFCTSCK	98696.7	Lachnospiraceae	Family	Bacteria		Firmicutes	Clostridia	Clostridiales	Lachnospiraceae
VGLANEEVVNGVCER	238460	Firmicutes	Phylum	Bacteria		Firmicutes
YWGEPIPIVK	92004.5	Firmicutes	Phylum	Bacteria		Firmicutes
QDLWFATK	302067	Bacteria	Superkingdom	Bacteria
NWEKPITLAR	84491.7	Firmicutes	Phylum	Bacteria		Firmicutes
NETNDQVTVDSAEATK	36161.7	Clostridiales	Order	Bacteria		Firmicutes	Clostridia	Clostridiales
NETNDQVTVDSAEATKK	14938.7	Clostridiales	Order	Bacteria		Firmicutes	Clostridia	Clostridiales
IQMTTPLVEMDGDEMTR	233307	Bacteria	Superkingdom	Bacteria
INVNTECQLYFQEATR	232907	Firmicutes	Phylum	Bacteria		Firmicutes
TGAMPLVLHGGTGIPEDMIK	1.01496e+06	[Ruminococcus] torques	Species	Bacteria		Firmicutes	Clostridia	Clostridiales	Lachnospiraceae	Mediterraneibacter	[Ruminococcus] torques
QIADLGVDMLAAGIGNIHGK	379410	Roseburia	Genus	Bacteria		Firmicutes	Clostridia	Clostridiales	Lachnospiraceae	Roseburia
YPANWAGLSFETLDAIQQK	149020	Clostridiales	Order	Bacteria		Firmicutes	Clostridia	Clostridiales
KYIEAGKDLEGK	665983	Bacteria	Superkingdom	Bacteria
YIEAGKDLEGK	1101950	Bacteria	Superkingdom	Bacteria
AILQTAQELNSPVILGVSEGAGK	568313	Firmicutes	Phylum	Bacteria		Firmicutes
YMTGFETVAAMVK	172260	Clostridiales	Order	Bacteria		Firmicutes	Clostridia	Clostridiales
EGHYAVGQFNINNLEWTK	508100	Firmicutes	Phylum	Bacteria		Firmicutes
MLVSATEMLK	9971.95	Firmicutes	Phylum	Bacteria		Firmicutes
MLVSATEMLKK	638893	Firmicutes	Phylum	Bacteria		Firmicutes
GNEWWESLK	96092.7	Firmicutes	Phylum	Bacteria		Firmicutes
IENPFLPFNR	383713	Bacteria	Superkingdom	Bacteria
EADANGGDIGYMPFPISVGGK	351535	Lachnospiraceae bacterium A4	Species	Bacteria		Firmicutes	Clostridia	Clostridiales	Lachnospiraceae		Lachnospiraceae bacterium A4
ESSADNQAAAMVFVK	431813	Lachnospiraceae bacterium A4	Species	Bacteria		Firmicutes	Clostridia	Clostridiales	Lachnospiraceae		Lachnospiraceae bacterium A4
GEIGTMVLGSWAVAQMK	45855	Lachnospiraceae bacterium A4	Species	Bacteria		Firmicutes	Clostridia	Clostridiales	Lachnospiraceae		Lachnospiraceae bacterium A4
ILYDAVANGLTEDDYTTTDWEGCK	77069.3	Lachnospiraceae bacterium A4	Species	Bacteria		Firmicutes	Clostridia	Clostridiales	Lachnospiraceae		Lachnospiraceae bacterium A4
SGWCDNEGGYPISK	387227	Lachnospiraceae bacterium A4	Species	Bacteria		Firmicutes	Clostridia	Clostridiales	Lachnospiraceae		Lachnospiraceae bacterium A4
TDREQDGSMAK	91034	Lachnospiraceae bacterium A4	Species	Bacteria		Firmicutes	Clostridia	Clostridiales	Lachnospiraceae		Lachnospiraceae bacterium A4
TPTEFIAALQQIK	510023	Lachnospiraceae bacterium A4	Species	Bacteria		Firmicutes	Clostridia	Clostridiales	Lachnospiraceae		Lachnospiraceae bacterium A4
SDDVDVVYCVPAIDIVPVVEAVK	23417	Clostridiales	Order	Bacteria		Firmicutes	Clostridia	Clostridiales
AFEHGLTPILCCGESLEQR	749580	Lachnospiraceae	Family	Bacteria		Firmicutes	Clostridia	Clostridiales	Lachnospiraceae
GTNVEVGAENMYIEEK	811677	Lachnospiraceae	Family	Bacteria		Firmicutes	Clostridia	Clostridiales	Lachnospiraceae
DYFKEDDAFLNKK	535937	Lachnospiraceae	Family	Bacteria		Firmicutes	Clostridia	Clostridiales	Lachnospiraceae
GAFTGEIAPGMLVDAGVK	773540	Lachnospiraceae bacterium A4	Species	Bacteria		Firmicutes	Clostridia	Clostridiales	Lachnospiraceae		Lachnospiraceae bacterium A4
SDLVGITADQVKK	803723	Lachnospiraceae bacterium A4	Species	Bacteria		Firmicutes	Clostridia	Clostridiales	Lachnospiraceae		Lachnospiraceae bacterium A4
SDLVGITADQVK	924465	Lachnospiraceae bacterium A4	Species	Bacteria		Firmicutes	Clostridia	Clostridiales	Lachnospiraceae		Lachnospiraceae bacterium A4
ETGVTMDWIR	521067	Lachnospiraceae	Family	Bacteria		Firmicutes	Clostridia	Clostridiales	Lachnospiraceae
EGETLILNANNK	211030	Lachnospiraceae bacterium MD335	Species	Bacteria		Firmicutes	Clostridia	Clostridiales	Lachnospiraceae		Lachnospiraceae bacterium MD335
[truncated: 7,319 more rows]

## Sheet: Function_DIA-NN-libE
Name	Taxonomy Id	Taxonomy name	Preferred name	Gene_Ontology_id	Gene_Ontology_name	Gene_Ontology_namespace	EC_id	EC_de	EC_an	EC_ca	KEGG_ko	KEGG_Pathway_Entry	KEGG_Pathway_Name	KEGG_Module	KEGG_Reaction	KEGG_rclass	BRITE	KEGG_TC	CAZy	BiGG_Reaction	COG accession	COG category	COG name	NOG accession	NOG category	NOG name
1-1_GL0139097	186801		glgP				2.4.1.1	Glycogen phosphorylase.	((1->4)-alpha-D-glucosyl)(n) + phosphate = ((1->4)-alpha-D-glucosyl)(n-1)+ alpha-D-glucose 1-phosphate.	Polyphosphorylase.;Amylophosphorylase.;Muscle phosphorylase a and b.	ko:K00688	ko00500,ko01100,ko01110,ko02026,ko04217,ko04910,ko04922,ko04931,map00500,map01100,map01110,map02026,map04217,map04910,map04922,map04931	Starch and sucrose metabolism;Metabolic pathways;Biosynthesis of secondary metabolites;Biofilm formation - Escherichia coli		R02111		ko00000,ko00001,ko01000		GT35		COG0058	G	Glucan phosphorylase	2480	G	Phosphorylase is an important allosteric enzyme in carbohydrate metabolism. Enzymes from different sources differ in their regulatory mechanisms and in their natural substrates. However, all known phosphorylases share catalytic and structural properties
1-1_GL0139097	186801		glgP				2.4.1.1	Glycogen phosphorylase.	((1->4)-alpha-D-glucosyl)(n) + phosphate = ((1->4)-alpha-D-glucosyl)(n-1)+ alpha-D-glucose 1-phosphate.	Polyphosphorylase.;Amylophosphorylase.;Muscle phosphorylase a and b.	ko:K00688	ko00500,ko01100,ko01110,ko02026,ko04217,ko04910,ko04922,ko04931,map00500,map01100,map01110,map02026,map04217,map04910,map04922,map04931	Starch and sucrose metabolism;Metabolic pathways;Biosynthesis of secondary metabolites;Biofilm formation - Escherichia coli		R02111		ko00000,ko00001,ko01000		GT35		COG0058	G	Glucan phosphorylase	2480	G	Phosphorylase is an important allosteric enzyme in carbohydrate metabolism. Enzymes from different sources differ in their regulatory mechanisms and in their natural substrates. However, all known phosphorylases share catalytic and structural properties
1-1_GL0139097	186801		glgP				2.4.1.1	Glycogen phosphorylase.	((1->4)-alpha-D-glucosyl)(n) + phosphate = ((1->4)-alpha-D-glucosyl)(n-1)+ alpha-D-glucose 1-phosphate.	Polyphosphorylase.;Amylophosphorylase.;Muscle phosphorylase a and b.	ko:K00688	ko00500,ko01100,ko01110,ko02026,ko04217,ko04910,ko04922,ko04931,map00500,map01100,map01110,map02026,map04217,map04910,map04922,map04931	Starch and sucrose metabolism;Metabolic pathways;Biosynthesis of secondary metabolites;Biofilm formation - Escherichia coli		R02111		ko00000,ko00001,ko01000		GT35		COG0058	G	Glucan phosphorylase	2480	G	Phosphorylase is an important allosteric enzyme in carbohydrate metabolism. Enzymes from different sources differ in their regulatory mechanisms and in their natural substrates. However, all known phosphorylases share catalytic and structural properties
1-1_GL0139097	186801		glgP				2.4.1.1	Glycogen phosphorylase.	((1->4)-alpha-D-glucosyl)(n) + phosphate = ((1->4)-alpha-D-glucosyl)(n-1)+ alpha-D-glucose 1-phosphate.	Polyphosphorylase.;Amylophosphorylase.;Muscle phosphorylase a and b.	ko:K00688	ko00500,ko01100,ko01110,ko02026,ko04217,ko04910,ko04922,ko04931,map00500,map01100,map01110,map02026,map04217,map04910,map04922,map04931	Starch and sucrose metabolism;Metabolic pathways;Biosynthesis of secondary metabolites;Biofilm formation - Escherichia coli		R02111		ko00000,ko00001,ko01000		GT35		COG0058	G	Glucan phosphorylase	2480	G	Phosphorylase is an important allosteric enzyme in carbohydrate metabolism. Enzymes from different sources differ in their regulatory mechanisms and in their natural substrates. However, all known phosphorylases share catalytic and structural properties
[truncated: 8,287 more rows]

## Sheet: Function_DDA-MQ
Name	Taxonomy Id	Taxonomy name	Preferred name	Gene_Ontology_id	Gene_Ontology_name	Gene_Ontology_namespace	EC_id	EC_de	EC_an	EC_ca	KEGG_ko	KEGG_Pathway_Entry	KEGG_Pathway_Name	KEGG_Module	KEGG_Reaction	KEGG_rclass	BRITE	KEGG_TC	CAZy	BiGG_Reaction	COG accession	COG category	COG name	NOG accession	NOG category	NOG name
[truncated: 4,046 more rows]
