# Supplementary material for: Increasing taxonomic and functional characterization of host-microbiome interactions by DIA-PASEF metaproteomics
Source: Front Microbiol. 2023 Oct 16;14:1258703. doi: 10.3389/fmicb.2023.1258703 (PMC10613666; doi:10.3389/fmicb.2023.1258703)
Supplement: Supplementary file 11 [file Table_4.XLSX]

## Sheet: Wang et al. 2019
Genus	Peptide count in DIA-PASEF	Abundance (Peptide count_DIA-PASEF) %	Peptide count in DDA-PASEF	Abundance (Peptide count_DDA-PASEF) %	Metagenomics abundance % (35 cores, Wang et al. 2019 )
Acetatifactor					0.19 ± 0.74
Acetivibrio	4	0.156495	1	0.141243
Acetoanaerobium	1	0.0391236
Acetobacterium	1	0.0391236	3	0.423729
Acetonema	2	0.0782473	1	0.141243
Achromobacter	1	0.0391236
Acidaminococcus	3	0.117371
Acidianus	1	0.0391236
Acidisphaera	1	0.0391236
Acidithrix	1	0.0391236
Acidocella	1	0.0391236
Acinetobacter	1	0.0391236
Actinomyces	1	0.0391236
Acyrthosiphon	1	0.0391236
Agromyces	1	0.0391236
Akkermansia	1	0.0391236
Aliivibrio			1	0.141243
Alishewanella	1	0.0391236
Alistipes	149	5.82942	2	0.282486	1.52 ± 1.78
Alkalibacterium	1	0.0391236
Alkalihalobacillus	1	0.0391236	92	12.9944
Alkaliphilus	2	0.0782473
Allobaculum					0.94 ± 2.77
Alloiococcus	1	0.0391236
Alloprevotella					1.38 ± 2.17
Amphimedon	2	0.0782473	152	21.4689
Amycolatopsis	1	0.0391236	1	0.141243
Anaerobium	3	0.117371	1	0.141243
Anaerofilum					0.05 ± 0.06
Anaerofustis	1	0.0391236	1	0.141243
Anaerosporomusa	1	0.0391236
Anaerostipes	3	0.117371	1	0.141243	3.29 ± 2.54
Anaerotignum	7	0.273865	1	0.141243
Anaerotruncus	210	8.21596	59	8.33333	0.22 ± 0.22
Anopheles	1	0.0391236	1	0.141243
Anoplophora	1	0.0391236	2	0.282486
Arcobacter	2	0.0782473
Arthrobacter	1	0.0391236
Astyanax	1	0.0391236
Atopobium	1	0.0391236
Bacillus	9	0.352113	22	3.10734
Bacteriovorax	1	0.0391236	1	0.141243
Bacteroides	114	4.46009	2	0.282486	2.35 ± 3.95
Barnesiella					4.83 ± 5.23
Beauveria	1	0.0391236
Bifidobacterium					0.54 ± 1.15
Bilophila	8	0.312989	1	0.141243
Bipolaris	1	0.0391236
Blastopirellula	1	0.0391236
Blautia	17	0.665102	1	0.141243	0.87 ± 2.43
Bodo	2	0.0782473	1	0.141243
Bordetella	1	0.0391236
Bos	1	0.0391236
Brachypodium	1	0.0391236
Brachyspira	1	0.0391236	4	0.564972
Bradyrhizobium	1	0.0391236
Brevibacillus			1	0.141243
Brugia	1	0.0391236
Buchnera			1	0.141243
Burkholderia	1	0.0391236
Butyricicoccus	63	2.46479	90	12.7119
Butyrivibrio	31	1.21283	1	0.141243
Caballeronia	1	0.0391236
Caldalkalibacillus	1	0.0391236
Campylobacter	1	0.0391236
Candidatus Arthromitus	3	0.117371
Candidatus Desulfofervidus	2	0.0782473
Candidatus Desulforudis	1	0.0391236
Candidatus Glomeribacter	1	0.0391236
Candidatus Kryptonium	1	0.0391236
Candidatus Magnetobacterium	1	0.0391236
Candidatus Micropelagos	1	0.0391236
Candidatus Stoquefichus			1	0.141243
Candidatus Symbiothrix	2	0.0782473	3	0.423729
Candidatus Tachikawaea	1	0.0391236
Candidatus Vecturithrix	1	0.0391236
Carboxydothermus	1	0.0391236
Catabacter	1	0.0391236	2	0.282486
Catellicoccus	1	0.0391236	1	0.141243
Catonella	2	0.0782473	1	0.141243
Caulobacter	2	0.0782473	1	0.141243
Celeribacter	1	0.0391236
Cellulosilyticum	6	0.234742	2	0.282486
Chitinispirillum	1	0.0391236	1	0.141243
Chitinophaga	1	0.0391236	55	7.76836
Chlamydia	1	0.0391236
Chlamydomonas	1	0.0391236
Chondromyces	1	0.0391236
Chryseobacterium	1	0.0391236
Chrysochromulina	1	0.0391236
Clavispora	1	0.0391236
Cloacibacillus	1	0.0391236	1	0.141243
Clonorchis	1	0.0391236	1	0.141243
Clostridium	307	12.011	6	0.847458	4.16 ± 8.92
Collinsella	1	0.0391236	1	0.141243
Colwellia	1	0.0391236
Comamonas	1	0.0391236	2	0.282486
Coprococcus	14	0.547731	18	2.54237
Corallococcus			1	0.141243
Cucumis	1	0.0391236
Culex	1	0.0391236
Cupriavidus	1	0.0391236
Cyphellophora	1	0.0391236
Dacryopinax	1	0.0391236
Danio	1	0.0391236
Daphnia	1	0.0391236	73	10.3107
Debaryomyces	2	0.0782473
Defluviimonas	1	0.0391236
Dermabacter	1	0.0391236
Desulfallas	1	0.0391236	4	0.564972
Desulfobacter	1	0.0391236
Desulfocapsa	1	0.0391236	1	0.141243
Desulfomonile	2	0.0782473	7	0.988701
Desulfotignum	1	0.0391236	1	0.141243
Desulfotomaculum	1	0.0391236	1	0.141243
Desulfovibrio	42	1.64319	1	0.141243
Desulfurella	1	0.0391236
Dethiosulfatarculus	1	0.0391236
Dichelobacter	1	0.0391236	1	0.141243
Dietzia	1	0.0391236
Dorea	97	3.79499	1	0.141243
Drosophila	1	0.0391236
Dysgonomonas	2	0.0782473
Eggerthella	1	0.0391236	1	0.141243	0.07 ± 0.09
Entamoeba	2	0.0782473
Enterocloster	13	0.508607	1	0.141243
Enterococcus	4	0.156495	1	0.141243
Enterorhabdus					0.40 ± 0.56
Erysipelotrichaceae incertae sedisv					0.32 ± 0.52
Erythrobacter	2	0.0782473
Estrella	1	0.0391236
Eubacterium	220	8.6072	1	0.141243
Eutrema	1	0.0391236
Eutreptiella	1	0.0391236	2	0.282486
Eutypa	1	0.0391236
Exiguobacterium			1	0.141243
Faecalibacterium	4	0.156495	172	24.2938
Faecalicatena	3	0.117371	1	0.141243
Fervidicola	1	0.0391236
Fibrisoma	1	0.0391236
Fibularhizoctonia	1	0.0391236	1	0.141243
Flavobacterium	2	0.0782473
Flavonifractor	15	0.586854	2	0.282486	0.22 ± 0.28
Flexilinea	1	0.0391236
Frischella	1	0.0391236
Frondihabitans	1	0.0391236
Fusicatenibacter	2	0.0782473	3	0.423729
Fusobacterium	4	0.156495	1	0.141243
Galerina	1	0.0391236	1	0.141243
Gallibacterium	1	0.0391236
Gemella	1	0.0391236
Gemmatirosa	1	0.0391236
Geobacter	2	0.0782473	1	0.141243
Geofilum	1	0.0391236
Glossina	1	0.0391236
Gordonia	2	0.0782473			0.04 ± 0.08
Gossypium	1	0.0391236
Halanaerobium	1	0.0391236
Halobacteroides			1	0.141243
Haloplasma	1	0.0391236
Halorhabdus	1	0.0391236
Helicobacter	3	0.117371			1.21 ± 1.66
Herbinix	2	0.0782473	1	0.141243
Herpetosiphon	1	0.0391236
Heterocephalus	1	0.0391236
Histophilus	1	0.0391236	3	0.423729
Holdemanella	1	0.0391236	45	6.35593
Holdemania	2	0.0782473	1	0.141243
Hungateiclostridium			1	0.141243
Hungatella	17	0.665102	57	8.05085
Hydrogenibacillus	1	0.0391236
Hymenobacter	1	0.0391236	1	0.141243
Intestinimonas					0.30 ± 0.38
Isoptericola			1	0.141243
Jaapia	1	0.0391236
Jiulongibacter	1	0.0391236
Johnsonella	1	0.0391236
Kingella	1	0.0391236
Komagataeibacter	1	0.0391236
Kordia	1	0.0391236
Ktedonobacter	1	0.0391236	1	0.141243
Labilithrix	1	0.0391236
Labrenzia	1	0.0391236
Lachnoanaerobaculum	3	0.117371	1	0.141243	0.68 ± 1.03
Lachnoclostridium	8	0.312989	1	0.141243
Lachnospira	1	0.0391236
Lachnospiracea incertae sedis					0.24 ± 0.42
Lacrimispora	1	0.0391236	1	0.141243
Lactobacillus	277	10.8372	1	0.141243	10.51 ± 16.78
Lactococcus	1	0.0391236
Laetiporus	1	0.0391236
Lawsonia	1	0.0391236
Leadbetterella	1	0.0391236	1	0.141243
Leeuwenhoekiella	1	0.0391236
Legionella	3	0.117371
Leifsonia			1	0.141243
Lentivirus	1	0.0391236
Lepisosteus	3	0.117371
Leptosphaeria	1	0.0391236
Leptospira			1	0.141243
Leptotrichia	2	0.0782473
Leuconostoc	1	0.0391236	1	0.141243
Limnohabitans	2	0.0782473
Liquorilactobacillus	1	0.0391236
Lottia	1	0.0391236
Lunatimonas	1	0.0391236
Lysinibacillus	2	0.0782473	2	0.282486
Lysobacter	2	0.0782473	1	0.141243
Macellibacteroides	1	0.0391236
Mahella	1	0.0391236
Mannheimia	1	0.0391236
Marchantia	1	0.0391236
Maribacter	1	0.0391236	1	0.141243
Marinobacter	1	0.0391236
Marvinbryantia	6	0.234742	1	0.141243	0.21 ± 0.30
Massilia	1	0.0391236
Mediterraneibacter	2	0.0782473	1	0.141243
Mesorhizobium	1	0.0391236	1	0.141243
Methanobacterium	1	0.0391236
Methanolacinia	1	0.0391236
Methanothermus	1	0.0391236	4	0.564972
Methylobacterium	1	0.0391236
Microbacterium	1	0.0391236
Microcoleus	1	0.0391236
Micromonas	1	0.0391236
Micromonospora	1	0.0391236
Mitsuokella			1	0.141243
Mucispirillum	165	6.4554	1	0.141243	0.16 ± 0.23
Mustela			1	0.141243
Mycena	2	0.0782473
Mycoplasma	2	0.0782473
Naegleria	1	0.0391236
Nasonia	1	0.0391236	98	13.8418
Neobacillus			1	0.141243
Nippostrongylus	1	0.0391236
Nitrososphaera	1	0.0391236
Nitrosospira	1	0.0391236
Nonlabens	1	0.0391236
Nostoc	1	0.0391236
Oceanicaulis	1	0.0391236
Ochrobactrum	1	0.0391236	1	0.141243
Odoribacter	6	0.234742	2	0.282486	0.09 ± 0.18
Olsenella	1	0.0391236			0.13 ± 0.29
Operophtera	1	0.0391236
Opitutus	1	0.0391236
Oribacterium	4	0.156495	1	0.141243
Oscillibacter	113	4.42097	1	0.141243	1.51 ± 1.73
Oxobacter	2	0.0782473
Paenibacillus	6	0.234742	1	0.141243
Paeniclostridium	1	0.0391236
Paludibacter	2	0.0782473
Pantoea	1	0.0391236
Papilio	1	0.0391236	1	0.141243
Parabacteroides	2	0.0782473	1	0.141243	6.63 ± 14.12
Paraliobacillus	1	0.0391236
Paramecium	1	0.0391236
Paraprevotella	3	0.117371	1	0.141243
Pararhodospirillum	1	0.0391236
Parasutterella					0.15 ± 0.25
Pediococcus			1	0.141243
Pedobacter	1	0.0391236
Peptoanaerobacter	1	0.0391236
Peptoniphilus	1	0.0391236
Perkinsus	1	0.0391236
Phaeoacremonium	1	0.0391236	1	0.141243
Phaeobacter	1	0.0391236	16	2.25989
Phocaeicola	1	0.0391236	1	0.141243
Photobacterium	3	0.117371	1	0.141243
Phytophthora	1	0.0391236
Piscirickettsia	1	0.0391236
Plasmodium	1	0.0391236
Plesiocystis	1	0.0391236	1	0.141243
Pontibacter	2	0.0782473
Porphyromonas	11	0.43036	40	5.64972
Prevotella	75	2.93427	3	0.423729	0.81 ± 1.05
Proboscivirus	1	0.0391236
Prochlorococcus	2	0.0782473	11	1.55367
Pseudoalteromonas	1	0.0391236	1	0.141243
Pseudocercospora			1	0.141243
Pseudodesulfovibrio	1	0.0391236	3	0.423729
Pseudoflavonifractor	1	0.0391236			0.15 ± 0.21
Pseudogymnoascus	1	0.0391236	1	0.141243
Pseudoleptotrichia	1	0.0391236
Pseudomonas	3	0.117371
Pseudopedobacter	1	0.0391236
Pseudoramibacter	2	0.0782473
Puccinia	1	0.0391236	1	0.141243
Purpureocillium	1	0.0391236
Pyrenophora	1	0.0391236
Pyrinomonas	1	0.0391236	2	0.282486
Ramlibacter	1	0.0391236	2	0.282486
Rhizobium	2	0.0782473
Rhizopus	1	0.0391236
Rhodobacter	2	0.0782473
Rhodococcus	1	0.0391236
Rhodospirillum	1	0.0391236
Rikenella					0.15 ± 0.22
Rivularia	1	0.0391236
Robinsoniella	4	0.156495	7	0.988701
Roseburia	138	5.39906	1	0.141243
Roseivirga	1	0.0391236	2	0.282486
Roseobacter	1	0.0391236	1	0.141243
Rubellimicrobium	1	0.0391236
Rufibacter	2	0.0782473	1	0.141243
Ruminococcus	30	1.17371	4	0.564972	0.26 ± 0.74
Saccharibacteria genera incertae sedis					0.40 ± 0.53
Saccharicrinis	1	0.0391236
Saccharomyces	1	0.0391236
Salinispira	1	0.0391236	1	0.141243
Salmonella	2	0.0782473
Sandaracinus	1	0.0391236	1	0.141243
Sanguibacteroides	3	0.117371
Saprolegnia	1	0.0391236
Sarcoptes	1	0.0391236
Scedosporium	1	0.0391236
Schistosoma	1	0.0391236
Schizosaccharomyces	1	0.0391236
Selenomonas	3	0.117371	27	3.81356
Shewanella	1	0.0391236
Shuttleworthia	2	0.0782473	1	0.141243
Slackia	1	0.0391236
Solanum	1	0.0391236
Sorangium	1	0.0391236
Sphaerochaeta	2	0.0782473	1	0.141243
Sphaerotilus	1	0.0391236
Sphingobium			1	0.141243
Sphingomonas	1	0.0391236
Stachybotrys	1	0.0391236
Staphylococcus	1	0.0391236
Stenotrophomonas	1	0.0391236	1	0.141243
Stomatobaculum	3	0.117371	1	0.141243
Streptococcus	6	0.234742	1	0.141243
Streptomyces	12	0.469484	1	0.141243
Strongyloides	1	0.0391236
Subdoligranulum	4	0.156495
Synechococcus	1	0.0391236	1	0.141243
Syntrophomonas	1	0.0391236
Taenia	1	0.0391236	1	0.141243
Tannerella	3	0.117371	61	8.61582
Terrisporobacter	1	0.0391236
Thalassolituus	1	0.0391236
Thermobacillus	1	0.0391236	1	0.141243
Thermoclostridium	2	0.0782473	1	0.141243
Thermococcus	1	0.0391236
Thermosynechococcus	1	0.0391236
Thioalkalivibrio	1	0.0391236	1	0.141243
Tieghemostelium	1	0.0391236
Tinamus			1	0.141243
Trachymyrmex	1	0.0391236
Treponema	3	0.117371	2	0.282486
Tribolium	1	0.0391236
Trichinella	2	0.0782473
Trichococcus	1	0.0391236	1	0.141243
Trichoplax	1	0.0391236
Trichosporon			1	0.141243
Truepera	1	0.0391236	1	0.141243
Trypanosoma	1	0.0391236	1	0.141243
Tulanevirus	1	0.0391236
Tulasnella	2	0.0782473
Turicibacter					1.38 ± 3.67
Tyzzerella	1	0.0391236	1	0.141243
Variovorax	1	0.0391236	1	0.141243
Veillonella	1	0.0391236	1	0.141243
Vibrio	3	0.117371	9	1.27119
Volvox	1	0.0391236
Waddlia			1	0.141243
Wolbachia			1	0.141243
Xanthomonas	1	0.0391236
Xenopus	1	0.0391236
Zobellia	1	0.0391236
Zygosaccharomyces			1	0.141243

## Sheet: Beresford-Jones et al 
Species	Number of Species-specific peptides	Relative Abundance of Species-specific peptides %	Mean Abundance % ( as in Table S4, column H from Beresford-Jones et.al.)
Lachnospiraceae bacterium A4	1384	19.1134	NA
Lachnospiraceae bacterium MD335	1334	18.4229	NA
Lachnospiraceae bacterium A2	465	6.42176	NA
Lachnospiraceae bacterium 28-4	383	5.28932	NA
Anaerotruncus sp. G3(2012)	341	4.70929	0.233509
Clostridium sp. MD294	314	4.33642	NA
Mucispirillum schaedleri	305	4.21213	0.458271
Eubacterium plexicaudatum	242	3.34208	NA
Dorea sp. 5-2	135	1.86438	1.30075
Eubacterium sp. 14-2	135	1.86438	NA
Lachnospiraceae bacterium M18-1	134	1.85057	NA
Firmicutes bacterium ASF500	125	1.72628	NA
Oscillibacter sp. 1-3	123	1.69866	1.55291
Hungateiclostridiaceae bacterium KB18	107	1.4777	NA
Lachnospiraceae bacterium 10-1	100	1.38102	NA
Butyricicoccus pullicaecorum	84	1.16006	NA
Lactobacillus reuteri	65	0.897666	NA
Lactobacillus murinus	51	0.704323	NA
Lachnospiraceae bacterium MD308	44	0.607651	NA
Hungatella hathewayi	34	0.469548	NA
Alistipes sp. CHKCI003	27	0.372877	NA
Alistipes shahii	26	0.359066	NA
butyrate-producing bacterium SS3/4	23	0.317636	NA
Enterocloster asparagiformis	20	0.276205	NA
Oscillibacter sp. KLE 1745	20	0.276205	NA
Lachnospiraceae bacterium TWA4	19	0.262395	NA
Butyrivibrio fibrisolvens	18	0.248584	NA
Lachnospiraceae bacterium 3-1	18	0.248584	NA
Roseburia intestinalis	17	0.234774	NA
Lactobacillus johnsonii	16	0.220964	1.86887
Lachnospiraceae bacterium 3_1_57FAA_CT1	16	0.220964	NA
Marvinbryantia formatexigens	16	0.220964	NA
Oscillibacter valericigenes	16	0.220964	NA
Butyrivibrio proteoclasticus	15	0.207154	NA
Clostridiales bacterium CHKCI001	15	0.207154	NA
Robinsoniella sp. RHS	15	0.207154	NA
Flavonifractor plautii	14	0.193343	0.00578856
Alistipes finegoldii	14	0.193343	0.191635
Clostridium sp. KLE 1755	13	0.179533	NA
Ruminococcaceae bacterium D16	13	0.179533	NA
Alistipes putredinis	12	0.165723	NA
Blautia hydrogenotrophica	12	0.165723	NA
Roseburia inulinivorans	12	0.165723	NA
Desulfovibrio piger	10	0.138102	NA
Odoribacter splanchnicus	10	0.138102	NA
Roseburia hominis	10	0.138102	NA
Blautia sp. YL58	9	0.124292	NA
Lachnospiraceae bacterium 2_1_46FAA	9	0.124292	NA
Ruminococcus albus	9	0.124292	NA
Coprococcus catus	8	0.110482	NA
Desulfovibrio desulfuricans	8	0.110482	NA
Lachnospiraceae bacterium JC7	8	0.110482	NA
Acetivibrio ethanolgignens	7	0.0966717	NA
Eubacteriaceae bacterium CHKCI004	7	0.0966717	NA
Prevotella rara	7	0.0966717	NA
Anaerotignum neopropionicum	6	0.0828615	NA
Cellulosilyticum lentocellum	6	0.0828615	NA
Clostridiales bacterium KLE1615	6	0.0828615	NA
Bacteroides uniformis	5	0.0690512	0.191464
Candidatus Arthromitus sp. SFB-mouse	5	0.0690512	NA
Coprococcus comes	5	0.0690512	NA
Dorea longicatena	5	0.0690512	NA
Dorea sp. D27	5	0.0690512	NA
Prevotella ruminicola	5	0.0690512	NA
Subdoligranulum variabile	5	0.0690512	NA
Bacteroides intestinalis	4	0.055241	0.642005
[Eubacterium] rectale	4	0.055241	NA
Anaerobium acetethylicum	4	0.055241	NA
Anaerostipes caccae	4	0.055241	NA
Bacteroides graminisolvens	4	0.055241	NA
Bacteroides oleiciplenus	4	0.055241	NA
Butyrivibrio crossotus	4	0.055241	NA
Catonella morbi	4	0.055241	NA
Clostridiales bacterium 1_7_47FAA	4	0.055241	NA
Clostridium homopropionicum	4	0.055241	NA
Clostridium saccharolyticum	4	0.055241	NA
Clostridium sp. D5	4	0.055241	NA
Dysgonomonas mossii	4	0.055241	NA
Eubacterium ventriosum	4	0.055241	NA
Faecalibacterium prausnitzii	4	0.055241	NA
Lachnoclostridium phytofermentans	4	0.055241	NA
Lachnospiraceae bacterium 1_4_56FAA	4	0.055241	NA
Oribacterium sp. oral taxon 078	4	0.055241	NA
Porphyromonas cangingivalis	4	0.055241	NA
Roseburia faecis	4	0.055241	NA
Ruminococcus champanellensis	4	0.055241	NA
Tannerella forsythia	4	0.055241	NA
Alistipes indistinctus	3	0.0414307	0.0029844
Bacteroides thetaiotaomicron	3	0.0414307	0.929859
[Eubacterium] siraeum	3	0.0414307	NA
Alistipes inops	3	0.0414307	NA
Anaerotignum propionicum	3	0.0414307	NA
Candidatus Stoquefichus sp. KLE1796	3	0.0414307	NA
Catabacter hongkongensis	3	0.0414307	NA
Clostridia bacterium BRH_c25	3	0.0414307	NA
Clostridiales bacterium CoAT_21-4c	3	0.0414307	NA
Clostridium pasteurianum	3	0.0414307	NA
Clostridium sp. (strain ATCC 29733 / VPI C48-50)	3	0.0414307	NA
Clostridium sp. C105KSO13	3	0.0414307	NA
Clostridium sp. M62/1	3	0.0414307	NA
Clostridium sp. W14A	3	0.0414307	NA
Eubacterium cellulosolvens	3	0.0414307	NA
Fusicatenibacter saccharivorans	3	0.0414307	NA
Herbinix hemicellulosilytica	3	0.0414307	NA
Hungateiclostridium clariflavum	3	0.0414307	NA
Lawsonia intracellularis	3	0.0414307	NA
Oxobacter pfennigii	3	0.0414307	NA
Paenibacillus sp. Soil766	3	0.0414307	NA
Ruminococcus bicirculans	3	0.0414307	NA
Sanguibacteroides justesenii	3	0.0414307	NA
Stomatobaculum longum	3	0.0414307	NA
Treponema primitia	3	0.0414307	NA
Treponema saccharophilum	3	0.0414307	NA
Klebsiella pneumoniae	2	0.0276205	0.00217448
Bilophila sp. 4_1_30	2	0.0276205	0.0875892
Desulfovibrio vulgaris	2	0.0276205	0.165617
Enterocloster clostridioformis	2	0.0276205	0.245038
[Clostridium] methylpentosum	2	0.0276205	NA
[Eubacterium] sulci	2	0.0276205	NA
Acetitomaculum ruminis	2	0.0276205	NA
Acetoanaerobium sticklandii	2	0.0276205	NA
Acetobacterium woodii	2	0.0276205	NA
Acetonema longum	2	0.0276205	NA
Actinomyces sp. oral taxon 175	2	0.0276205	NA
Akkermansia sp. KLE1798	2	0.0276205	NA
Alkaliphilus metalliredigens	2	0.0276205	NA
Anaerococcus hydrogenalis	2	0.0276205	NA
Anaerotruncus colihominis	2	0.0276205	NA
Bacillus endophyticus	2	0.0276205	NA
Bacteriovorax sp. BSW11_IV	2	0.0276205	NA
Bacteroidales bacterium KA00251	2	0.0276205	NA
Bacteroides cellulosilyticus	2	0.0276205	NA
Bacteroides pyogenes	2	0.0276205	NA
Bacteroides reticulotermitis	2	0.0276205	NA
Bacteroides stercoris	2	0.0276205	NA
Blastopirellula marina	2	0.0276205	NA
Blautia obeum	2	0.0276205	NA
Campylobacter gracilis	2	0.0276205	NA
Candidatus Desulfofervidus auxilii	2	0.0276205	NA
Candidatus Symbiothrix dinenymphae	2	0.0276205	NA
Candidatus Vecturithrix granuli	2	0.0276205	NA
Clostridiales bacterium KA00134	2	0.0276205	NA
Clostridiales bacterium S5-A14a	2	0.0276205	NA
Clostridium cellulovorans	2	0.0276205	NA
Clostridium chauvoei	2	0.0276205	NA
Clostridium colicanis	2	0.0276205	NA
Clostridium kluyveri	2	0.0276205	NA
Clostridium magnum	2	0.0276205	NA
Clostridium scatologenes	2	0.0276205	NA
Clostridium sp. (strain SY8519)	2	0.0276205	NA
Desulfallas gibsoniae	2	0.0276205	NA
Desulfocapsa sulfexigens	2	0.0276205	NA
Desulfomonile tiedjei	2	0.0276205	NA
Desulfovibrio alaskensis	2	0.0276205	NA
Desulfovibrio fairfieldensis	2	0.0276205	NA
Dethiosulfatarculus sandiegensis	2	0.0276205	NA
Dichelobacter nodosus	2	0.0276205	NA
endosymbiont of unidentified scaly snail isolate Monju	2	0.0276205	NA
Enterococcus saccharolyticus	2	0.0276205	NA
Erythrobacter sp. JL475	2	0.0276205	NA
Eubacterium limosum	2	0.0276205	NA
Exiguobacterium sp. (strain ATCC BAA-1283 / AT1b)	2	0.0276205	NA
Faecalicatena contorta	2	0.0276205	NA
Fibrisoma limi	2	0.0276205	NA
Filimonas lacunae	2	0.0276205	NA
Fusibacter sp. 3D3	2	0.0276205	NA
Helicobacter muridarum	2	0.0276205	NA
Herbinix luporum	2	0.0276205	NA
Holdemania filiformis	2	0.0276205	NA
Johnsonella ignava	2	0.0276205	NA
Ketogulonicigenium vulgare	2	0.0276205	NA
Lachnospiraceae bacterium 14-2	2	0.0276205	NA
Lachnospiraceae bacterium oral taxon 500	2	0.0276205	NA
Lactobacillus bifermentans	2	0.0276205	NA
Leeuwenhoekiella blandensis	2	0.0276205	NA
Lentisphaera araneosa	2	0.0276205	NA
Leptotrichia sp. oral taxon 847	2	0.0276205	NA
Limnohabitans sp. 63ED37-2	2	0.0276205	NA
Macellibacteroides sp. HH-ZS	2	0.0276205	NA
Microbacterium oleivorans	2	0.0276205	NA
Paludibacter jiangxiensis	2	0.0276205	NA
Pedobacter psychrophilus	2	0.0276205	NA
Photobacterium galatheae	2	0.0276205	NA
Photobacterium ganghwense	2	0.0276205	NA
Porphyromonas sp. COT-290 OH860	2	0.0276205	NA
Prevotella baroniae	2	0.0276205	NA
Prevotella bryantii	2	0.0276205	NA
Prevotella buccae	2	0.0276205	NA
Prevotella dentalis	2	0.0276205	NA
Prevotella oryzae	2	0.0276205	NA
Prevotella sp. oral taxon 473	2	0.0276205	NA
Proteiniphilum sp. 51_7	2	0.0276205	NA
Pseudoflavonifractor capillosus	2	0.0276205	NA
Pseudoramibacter alactolyticus	2	0.0276205	NA
Rivularia sp. PCC 7116	2	0.0276205	NA
Ruminococcus callidus	2	0.0276205	NA
Ruminococcus sp. DSM 100440	2	0.0276205	NA
Salinispira pacifica	2	0.0276205	NA
Salmonella enterica	2	0.0276205	NA
Selenomonas ruminantium	2	0.0276205	NA
Syntrophomonas zehnderi	2	0.0276205	NA
Thermoclostridium stercorarium	2	0.0276205	NA
Paenibacillus amylolyticus	1	0.0138102	7.25976e-05
Stenotrophomonas maltophilia	1	0.0138102	0.000703922
Paeniclostridium sordellii	1	0.0138102	0.000979158
Clostridium paraputrificum	1	0.0138102	0.00100962
Bacillus thuringiensis	1	0.0138102	0.00177584
Enterocloster bolteae	1	0.0138102	0.00208227
Pseudomonas fluorescens	1	0.0138102	0.00326996
Bacteroides ovatus	1	0.0138102	0.0352744
Escherichia coli	1	0.0138102	0.263133
[Bacillus] sp. KCTC 13219	1	0.0138102	NA
[Clostridium] cellulosi	1	0.0138102	NA
[Clostridium] ultunense	1	0.0138102	NA
[Eubacterium] brachy	1	0.0138102	NA
[Ruminococcus] lactaris	1	0.0138102	NA
[Ruminococcus] torques	1	0.0138102	NA
Acetobacter cibinongensis	1	0.0138102	NA
Acetobacterium bakii	1	0.0138102	NA
Acholeplasma palmae	1	0.0138102	NA
Achromobacter sp. Root83	1	0.0138102	NA
Acidaminococcus fermentans	1	0.0138102	NA
Acidisphaera rubrifaciens	1	0.0138102	NA
Acidithrix ferrooxidans	1	0.0138102	NA
Acidocella aminolytica	1	0.0138102	NA
Acinetobacter baumannii	1	0.0138102	NA
Actinobacteria bacterium IMCC26256	1	0.0138102	NA
Advenella mimigardefordensis	1	0.0138102	NA
Akkermansia glycaniphila	1	0.0138102	NA
Alishewanella sp. HH-ZS	1	0.0138102	NA
Alkalibacterium sp. AK22	1	0.0138102	NA
Alkalihalobacillus hemicellulosilyticus	1	0.0138102	NA
Alkalihalobacillus okhensis	1	0.0138102	NA
Alkalihalobacillus trypoxylicola	1	0.0138102	NA
Alkalispirochaeta odontotermitis	1	0.0138102	NA
Alloiococcus otitis	1	0.0138102	NA
Alloprevotella rava	1	0.0138102	NA
Amycolatopsis azurea	1	0.0138102	NA
Amycolatopsis keratiniphila	1	0.0138102	NA
Anaerococcus prevotii	1	0.0138102	NA
Anaerofustis stercorihominis	1	0.0138102	NA
Anaeroglobus geminatus	1	0.0138102	NA
Anaerolineaceae bacterium oral taxon 439	1	0.0138102	NA
Anaerosporomusa subterranea	1	0.0138102	NA
Arcobacter thereius	1	0.0138102	NA
Arcticibacter svalbardensis	1	0.0138102	NA
Arthrobacter sp. Hiyo8	1	0.0138102	NA
Asticcacaulis benevestitus	1	0.0138102	NA
Atopobium sp. oral taxon 199	1	0.0138102	NA
Aurantimonas manganoxydans	1	0.0138102	NA
Aureimonas ureilytica	1	0.0138102	NA
Azorhizobium caulinodans	1	0.0138102	NA
Bacillus altitudinis	1	0.0138102	NA
Bacillus flexus	1	0.0138102	NA
Bacillus glycinifermentans	1	0.0138102	NA
Bacillus sp. FJAT-27238	1	0.0138102	NA
Bacillus sp. TS-2	1	0.0138102	NA
Bacillus sporothermodurans	1	0.0138102	NA
Bacteriovorax sp. BAL6_X	1	0.0138102	NA
Bacteriovorax sp. Seq25_V	1	0.0138102	NA
bacterium 2013Arg42i	1	0.0138102	NA
bacterium F083	1	0.0138102	NA
Bacteroidales bacterium CF	1	0.0138102	NA
Bacteroides eggerthii	1	0.0138102	NA
Bacteroides finegoldii	1	0.0138102	NA
Bacteroides fluxus	1	0.0138102	NA
Bacteroides fragilis	1	0.0138102	NA
Bacteroidetes bacterium oral taxon 272	1	0.0138102	NA
Bacteroidetes bacterium UKL13-3	1	0.0138102	NA
Bacteroidetes oral taxon 274	1	0.0138102	NA
Bdellovibrio bacteriovorus	1	0.0138102	NA
Betaproteobacteria bacterium SG8_41	1	0.0138102	NA
Beutenbergia cavernae	1	0.0138102	NA
Bizionia argentinensis	1	0.0138102	NA
Blautia hansenii	1	0.0138102	NA
Blautia sp. KLE 1732	1	0.0138102	NA
Bordetella sp. N	1	0.0138102	NA
Brachyspira murdochii	1	0.0138102	NA
Bradyrhizobium sp. DOA9	1	0.0138102	NA
Bradyrhizobium sp. LTSPM299	1	0.0138102	NA
Brevibacillus sp. SKDU10	1	0.0138102	NA
Brevundimonas sp. Root1423	1	0.0138102	NA
Brochothrix thermosphacta	1	0.0138102	NA
Buchnera aphidicola	1	0.0138102	NA
Burkholderia ubonensis	1	0.0138102	NA
Burkholderia vietnamiensis	1	0.0138102	NA
Burkholderiaceae bacterium PBA	1	0.0138102	NA
butyrate-producing bacterium SM4/1	1	0.0138102	NA
Caballeronia hypogeia	1	0.0138102	NA
Caballeronia turbans	1	0.0138102	NA
Caldalkalibacillus thermarum	1	0.0138102	NA
Caldithrix abyssi	1	0.0138102	NA
candidate division TM6 bacterium GW2011_GWE2_42_60	1	0.0138102	NA
Candidatus [Bacteroides] periocalifornicus	1	0.0138102	NA
Candidatus Brocadia sinica	1	0.0138102	NA
Candidatus Collierbacteria bacterium GW2011_GWA1_44_12	1	0.0138102	NA
Candidatus Desulforudis audaxviator	1	0.0138102	NA
Candidatus Glomeribacter gigasporarum	1	0.0138102	NA
Candidatus Jorgensenbacteria bacterium GW2011_GWA2_45_13	1	0.0138102	NA
Candidatus Kryptonium thompsoni	1	0.0138102	NA
Candidatus Magnetobacterium bavaricum	1	0.0138102	NA
Candidatus Micropelagos thuwalensis	1	0.0138102	NA
Candidatus Moduliflexus flocculans	1	0.0138102	NA
Candidatus Moranbacteria bacterium GW2011_GWE1_35_17	1	0.0138102	NA
Candidatus Riesia pediculicola	1	0.0138102	NA
Candidatus Tachikawaea gelatinosa	1	0.0138102	NA
Candidatus Woesebacteria bacterium GW2011_GWB1_38_5b	1	0.0138102	NA
Carboxydothermus hydrogenoformans	1	0.0138102	NA
Catellicoccus marimammalium	1	0.0138102	NA
Caulobacter segnis	1	0.0138102	NA
Caulobacter sp. Root1455	1	0.0138102	NA
Cecembia lonarensis	1	0.0138102	NA
Celeribacter baekdonensis	1	0.0138102	NA
Cellulophaga geojensis	1	0.0138102	NA
Cellulophaga lytica	1	0.0138102	NA
Centipeda periodontii	1	0.0138102	NA
Chitinispirillum alkaliphilum	1	0.0138102	NA
Chlorobi bacterium OLB6	1	0.0138102	NA
Chondromyces apiculatus	1	0.0138102	NA
Chondromyces crocatus	1	0.0138102	NA
Christensenella minuta	1	0.0138102	NA
Chryseobacterium sp. Leaf201	1	0.0138102	NA
Chryseobacterium sp. StRB126	1	0.0138102	NA
Cloacibacillus porcorum	1	0.0138102	NA
Clostridiaceae bacterium BRH_c20a	1	0.0138102	NA
Clostridiales bacterium CHKCI006	1	0.0138102	NA
Clostridium acidurici	1	0.0138102	NA
Clostridium baratii	1	0.0138102	NA
Clostridium bornimense	1	0.0138102	NA
Clostridium botulinum	1	0.0138102	NA
Clostridium butyricum	1	0.0138102	NA
Clostridium disporicum	1	0.0138102	NA
Clostridium intestinale	1	0.0138102	NA
Clostridium paradoxum	1	0.0138102	NA
Clostridium saccharobutylicum	1	0.0138102	NA
Clostridium saccharoperbutylacetonicum	1	0.0138102	NA
Clostridium sp. 7_2_43FAA	1	0.0138102	NA
Clostridium sp. ASBs410	1	0.0138102	NA
Clostridium sp. BL8	1	0.0138102	NA
Clostridium sp. DMHC 10	1	0.0138102	NA
Clostridium sp. HMP27	1	0.0138102	NA
Clostridium sp. MSTE9	1	0.0138102	NA
Collinsella tanakaei	1	0.0138102	NA
Colwellia sp. MT41	1	0.0138102	NA
Comamonas testosteroni	1	0.0138102	NA
Conexibacter woesei	1	0.0138102	NA
Corynebacterium pyruviciproducens	1	0.0138102	NA
Corynebacterium sp. DNF00584	1	0.0138102	NA
Coxiella sp. DG_40	1	0.0138102	NA
Defluviimonas sp. 20V17	1	0.0138102	NA
Dehalococcoidia bacterium SG8_51_3	1	0.0138102	NA
Dehalogenimonas lykanthroporepellens	1	0.0138102	NA
Dehalogenimonas sp. WBC-2	1	0.0138102	NA
Deltaproteobacteria bacterium CSP1-8	1	0.0138102	NA
Deltaproteobacteria bacterium DG_8	1	0.0138102	NA
Deltaproteobacteria bacterium SM23_61	1	0.0138102	NA
Dermabacter sp. HFH0086	1	0.0138102	NA
Desulfobacter postgatei	1	0.0138102	NA
Desulfobulbaceae bacterium BRH_c16a	1	0.0138102	NA
Desulfohalobium retbaense	1	0.0138102	NA
Desulfomicrobium thermophilum	1	0.0138102	NA
Desulfonatronospira thiodismutans	1	0.0138102	NA
Desulfosporosinus meridiei	1	0.0138102	NA
Desulfotignum phosphitoxidans	1	0.0138102	NA
Desulfotomaculum nigrificans	1	0.0138102	NA
Desulfotomaculum reducens	1	0.0138102	NA
Desulfovibrio cuneatus	1	0.0138102	NA
Desulfovibrio fructosivorans	1	0.0138102	NA
Desulfovibrio hydrothermalis	1	0.0138102	NA
Desulfovibrio salexigens	1	0.0138102	NA
Desulfovibrio sp. JD160	1	0.0138102	NA
Desulfurella acetivorans	1	0.0138102	NA
Dorea formicigenerans	1	0.0138102	NA
Enterococcus mundtii	1	0.0138102	NA
Enterococcus phoeniculicola	1	0.0138102	NA
Erwinia typographi	1	0.0138102	NA
Estrella lausannensis	1	0.0138102	NA
Ethanoligenens harbinense	1	0.0138102	NA
Eubacteriaceae bacterium CHKCI005	1	0.0138102	NA
Eubacterium ramulus	1	0.0138102	NA
Exiguobacterium enclense	1	0.0138102	NA
Faecalitalea cylindroides	1	0.0138102	NA
Fervidicola ferrireducens	1	0.0138102	NA
Fimbriimonas ginsengisoli	1	0.0138102	NA
Flammeovirga sp. SJP92	1	0.0138102	NA
Flavobacterium cauense	1	0.0138102	NA
Flavobacterium limnosediminis	1	0.0138102	NA
Flavobacterium seoulense	1	0.0138102	NA
Flavobacterium sp. Root420	1	0.0138102	NA
Flexilinea flocculi	1	0.0138102	NA
Formosa agariphila	1	0.0138102	NA
Fretibacterium fastidiosum	1	0.0138102	NA
Frischella perrara	1	0.0138102	NA
Frondihabitans sp. PAMC 28766	1	0.0138102	NA
Fusobacterium nucleatum	1	0.0138102	NA
Fusobacterium sp. CM21	1	0.0138102	NA
Fusobacterium ulcerans	1	0.0138102	NA
Fusobacterium varium	1	0.0138102	NA
Gallibacterium anatis	1	0.0138102	NA
Gammaproteobacteria bacterium SG8_15	1	0.0138102	NA
Gemella bergeri	1	0.0138102	NA
Gemmatirosa kalamazoonesis	1	0.0138102	NA
Geofilum rubicundum	1	0.0138102	NA
Gordonia phthalatica	1	0.0138102	NA
Hafnia alvei	1	0.0138102	NA
Halanaerobium hydrogeniformans	1	0.0138102	NA
Halanaerobium praevalens	1	0.0138102	NA
Haliangium ochraceum	1	0.0138102	NA
Halobacteroides halobius	1	0.0138102	NA
Haloplasma contractile	1	0.0138102	NA
Helicobacter sp. MIT 05-5294	1	0.0138102	NA
Heliobacterium modesticaldum	1	0.0138102	NA
Histophilus somni	1	0.0138102	NA
Holdemanella biformis	1	0.0138102	NA
Hydrocarboniphaga effusa	1	0.0138102	NA
Hydrogenibacillus schlegelii	1	0.0138102	NA
Hymenobacter sp. PAMC 26628	1	0.0138102	NA
Ilyobacter polytropus	1	0.0138102	NA
Isoptericola dokdonensis	1	0.0138102	NA
Jiulongibacter sediminis	1	0.0138102	NA
Kandleria vitulina	1	0.0138102	NA
Kibdelosporangium phytohabitans	1	0.0138102	NA
Kluyvera georgiana	1	0.0138102	NA
Kordia algicida	1	0.0138102	NA
Ktedonobacter racemifer	1	0.0138102	NA
Kuenenia stuttgartiensis	1	0.0138102	NA
Kutzneria albida	1	0.0138102	NA
Labilithrix luteola	1	0.0138102	NA
Labrenzia alba	1	0.0138102	NA
Lachnospira eligens	1	0.0138102	NA
Lachnospiraceae bacterium TF01-11	1	0.0138102	NA
Lactobacillus amylolyticus	1	0.0138102	NA
Lactobacillus camelliae	1	0.0138102	NA
Lactobacillus dextrinicus	1	0.0138102	NA
Lactobacillus farciminis	1	0.0138102	NA
Lactobacillus gigeriorum	1	0.0138102	NA
Lactobacillus malefermentans	1	0.0138102	NA
Lactobacillus odoratitofui	1	0.0138102	NA
Lactobacillus oligofermentans	1	0.0138102	NA
Lactobacillus ultunensis	1	0.0138102	NA
Lactococcus raffinolactis	1	0.0138102	NA
Leadbetterella byssophila	1	0.0138102	NA
Legionella anisa	1	0.0138102	NA
Legionella norrlandica	1	0.0138102	NA
Legionella santicrucis	1	0.0138102	NA
Leifsonia sp. Root112D2	1	0.0138102	NA
Leptospira broomii	1	0.0138102	NA
Leptospira wolbachii	1	0.0138102	NA
Leptotrichia buccalis	1	0.0138102	NA
Lunatimonas lonarensis	1	0.0138102	NA
Lysinibacillus odysseyi	1	0.0138102	NA
Lysinibacillus sp. F5	1	0.0138102	NA
Lysobacter arseniciresistens	1	0.0138102	NA
Lysobacter concretionis	1	0.0138102	NA
Mahella australiensis	1	0.0138102	NA
Mannheimia haemolytica	1	0.0138102	NA
marine gamma proteobacterium HTCC2143	1	0.0138102	NA
Marinobacter subterrani	1	0.0138102	NA
Massilia sp. Leaf139	1	0.0138102	NA
Megasphaera cerevisiae	1	0.0138102	NA
Megasphaera elsdenii	1	0.0138102	NA
Megasphaera sp. BV3C16-1	1	0.0138102	NA
Mesorhizobium alhagi	1	0.0138102	NA
Mesorhizobium amorphae	1	0.0138102	NA
Methylobacterium aquaticum	1	0.0138102	NA
Methylothermaceae bacteria B42	1	0.0138102	NA
Microcoleus sp. PCC 7113	1	0.0138102	NA
Microscilla marina	1	0.0138102	NA
Mucilaginibacter sp. PPCGB 2223	1	0.0138102	NA
Mycobacterium europaeum	1	0.0138102	NA
Mycobacterium sp. TKK-01-0059	1	0.0138102	NA
Mycolicibacterium wolinskyi	1	0.0138102	NA
Mycoplasmopsis columbina	1	0.0138102	NA
Myxococcus xanthus	1	0.0138102	NA
Neobacillus bataviensis	1	0.0138102	NA
Niabella ginsenosidivorans	1	0.0138102	NA
Niabella soli	1	0.0138102	NA
Nitrosospira lacus	1	0.0138102	NA
Nocardiopsis alba	1	0.0138102	NA
Nostoc sp. MBR 210	1	0.0138102	NA
Oceanicaulis sp. HTCC2633	1	0.0138102	NA
Ochrobactrum sp. EGD-AQ16	1	0.0138102	NA
Octadecabacter antarcticus	1	0.0138102	NA
Odoribacter laneus	1	0.0138102	NA
Olsenella scatoligenes	1	0.0138102	NA
Opitutaceae bacterium TSB47	1	0.0138102	NA
Opitutus terrae	1	0.0138102	NA
Oscillatoriales cyanobacterium USR001	1	0.0138102	NA
Osedax symbiont Rs1	1	0.0138102	NA
Paenibacillus alvei	1	0.0138102	NA
Paenibacillus bovis	1	0.0138102	NA
Paenibacillus macerans	1	0.0138102	NA
Paenibacillus naphthalenovorans	1	0.0138102	NA
Paenibacillus pectinilyticus	1	0.0138102	NA
Paenibacillus sp. FSL H7-0357	1	0.0138102	NA
Paenibacillus sp. Soil750	1	0.0138102	NA
Paenibacillus terrae	1	0.0138102	NA
Pannonibacter phragmitetus	1	0.0138102	NA
Parabacteroides gordonii	1	0.0138102	NA
Parabacteroides johnsonii	1	0.0138102	NA
Paraliobacillus sp. PM-2	1	0.0138102	NA
Paraprevotella clara	1	0.0138102	NA
Paraprevotella xylaniphila	1	0.0138102	NA
Pararhodospirillum photometricum	1	0.0138102	NA
Parcubacteria group bacterium GW2011_GWA1_44_13	1	0.0138102	NA
Parcubacteria group bacterium GW2011_GWB1_41_4	1	0.0138102	NA
Parcubacteria group bacterium GW2011_GWF2_39_13b	1	0.0138102	NA
Pediococcus argentinicus	1	0.0138102	NA
Pedobacter sp. Hv1	1	0.0138102	NA
Pedosphaera parvula	1	0.0138102	NA
Peptoanaerobacter stomatis	1	0.0138102	NA
Phaeobacter gallaeciensis	1	0.0138102	NA
Phascolarctobacterium sp. CAG:207	1	0.0138102	NA
Phascolarctobacterium sp. CAG:266	1	0.0138102	NA
Phenylobacterium zucineum	1	0.0138102	NA
Phocaeicola coprocola	1	0.0138102	NA
Phocaeicola plebeius	1	0.0138102	NA
Phocaeicola salanitronis	1	0.0138102	NA
Photobacterium angustum	1	0.0138102	NA
Photobacterium damselae	1	0.0138102	NA
Phycisphaerae bacterium SG8_4	1	0.0138102	NA
Piscirickettsia salmonis	1	0.0138102	NA
Plesiocystis pacifica	1	0.0138102	NA
Polaribacter sp. MED152	1	0.0138102	NA
Pontibacter korlensis	1	0.0138102	NA
Pontibacter sp. BAB1700	1	0.0138102	NA
Porphyromonas catoniae	1	0.0138102	NA
Porphyromonas endodontalis	1	0.0138102	NA
Porphyromonas gingivicanis	1	0.0138102	NA
Porphyromonas macacae	1	0.0138102	NA
Porphyromonas sp. COT-108 OH1349	1	0.0138102	NA
Prevotella bergensis	1	0.0138102	NA
Prevotella copri	1	0.0138102	NA
Prevotella enoeca	1	0.0138102	NA
Prevotella melaninogenica	1	0.0138102	NA
Prevotella multisaccharivorax	1	0.0138102	NA
Prevotella oralis	1	0.0138102	NA
Prevotella saccharolytica	1	0.0138102	NA
Prevotella stercorea	1	0.0138102	NA
Prochlorococcus marinus	1	0.0138102	NA
Prochlorococcus sp. MIT 0701	1	0.0138102	NA
Prochlorococcus sp. MIT 0801	1	0.0138102	NA
Propionispora sp. 2/2-37	1	0.0138102	NA
Proteus vulgaris	1	0.0138102	NA
Pseudoalteromonas luteoviolacea	1	0.0138102	NA
Pseudoalteromonas sp. 13-15	1	0.0138102	NA
Pseudobacteroides cellulosolvens	1	0.0138102	NA
Pseudodesulfovibrio piezophilus	1	0.0138102	NA
Pseudoleptotrichia goodfellowii	1	0.0138102	NA
Pseudomonas savastanoi	1	0.0138102	NA
Pseudomonas sp. FeS53a	1	0.0138102	NA
Pseudopedobacter saltans	1	0.0138102	NA
Pseudoxanthomonas suwonensis	1	0.0138102	NA
Psychrobacter sp. JCM 18901	1	0.0138102	NA
Pyrinomonas methylaliphatogenes	1	0.0138102	NA
Ramlibacter sp. Leaf400	1	0.0138102	NA
Rhizobium loti	1	0.0138102	NA
Rhizobium sp. CF080	1	0.0138102	NA
Rhizobium sp. PDO1-076	1	0.0138102	NA
Rhizobium sp. Root1203	1	0.0138102	NA
Rhodobacter sphaeroides	1	0.0138102	NA
Rhodobacteraceae bacterium HLUCCO07	1	0.0138102	NA
Rhodococcus kyotonensis	1	0.0138102	NA
Rhodococcus sp. 008	1	0.0138102	NA
Rhodospirillum rubrum	1	0.0138102	NA
Roseburia sp. 499	1	0.0138102	NA
Roseivirga ehrenbergii	1	0.0138102	NA
Roseobacter denitrificans	1	0.0138102	NA
Roseobacter sp. AzwK-3b	1	0.0138102	NA
Rubellimicrobium thermophilum	1	0.0138102	NA
Rufibacter sp. DG15C	1	0.0138102	NA
Rufibacter tibetensis	1	0.0138102	NA
Ruminiclostridium cellulolyticum	1	0.0138102	NA
Ruminococcus flavefaciens	1	0.0138102	NA
Ruminococcus sp. 5_1_39BFAA	1	0.0138102	NA
Ruminococcus sp. SR1/5	1	0.0138102	NA
Saccharicrinis fermentans	1	0.0138102	NA
Sandaracinus amylolyticus	1	0.0138102	NA
Saprospira grandis	1	0.0138102	NA
SAR86 cluster bacterium SAR86A	1	0.0138102	NA
SAR86 cluster bacterium SAR86B	1	0.0138102	NA
Selenomonas infelix	1	0.0138102	NA
Shewanella sediminis	1	0.0138102	NA
Sorangium cellulosum	1	0.0138102	NA
Sphaerochaeta globosa	1	0.0138102	NA
Sphaerochaeta pleomorpha	1	0.0138102	NA
Sphaerotilus natans	1	0.0138102	NA
Sphingobacterium deserti	1	0.0138102	NA
Sphingobacterium sp. (strain 21)	1	0.0138102	NA
Sphingomonas panacis	1	0.0138102	NA
Sphingopyxis sp. (strain 113P3)	1	0.0138102	NA
Spirochaeta thermophila	1	0.0138102	NA
Sporanaerobacter acetigenes	1	0.0138102	NA
Sporocytophaga myxococcoides	1	0.0138102	NA
Sporomusa sp. An4	1	0.0138102	NA
Staphylococcus cohnii	1	0.0138102	NA
Stigmatella aurantiaca	1	0.0138102	NA
Streptococcus anginosus	1	0.0138102	NA
Streptococcus infantis	1	0.0138102	NA
Streptococcus mitis	1	0.0138102	NA
Streptococcus sp. DD12	1	0.0138102	NA
Streptococcus suis	1	0.0138102	NA
Streptococcus thermophilus	1	0.0138102	NA
Streptomonospora alba	1	0.0138102	NA
Streptomyces acidiscabies	1	0.0138102	NA
Streptomyces aurantiacus	1	0.0138102	NA
Streptomyces decoyicus	1	0.0138102	NA
Streptomyces hygroscopicus	1	0.0138102	NA
Streptomyces sp. CC71	1	0.0138102	NA
Streptomyces sp. FXJ1.172	1	0.0138102	NA
Streptomyces sp. MMG1522	1	0.0138102	NA
Streptomyces sp. MMG1533	1	0.0138102	NA
Streptomyces sp. Ncost-T10-10d	1	0.0138102	NA
Streptomyces sp. NRRL S-4	1	0.0138102	NA
Streptomyces sp. NRRL WC-3618	1	0.0138102	NA
Streptomyces sp. ScaeMP-6W	1	0.0138102	NA
Streptomyces thermoautotrophicus	1	0.0138102	NA
Streptomyces viridochromogenes	1	0.0138102	NA
Streptomyces xiamenensis	1	0.0138102	NA
Streptomycetaceae bacterium MP113-05	1	0.0138102	NA
Subdoligranulum sp. 4_3_54A2FAA	1	0.0138102	NA
Succinatimonas hippei	1	0.0138102	NA
Sulfitobacter pseudonitzschiae	1	0.0138102	NA
Sulfurimonas autotrophica	1	0.0138102	NA
Synechococcus sp. (strain JA-2-3B'a(2-13))	1	0.0138102	NA
Synechococcus sp. (strain JA-3-3Ab)	1	0.0138102	NA
Tannerella sp. oral taxon HOT-286	1	0.0138102	NA
Teredinibacter turnerae	1	0.0138102	NA
Terrisporobacter othiniensis	1	0.0138102	NA
Thalassolituus sp. HI0120	1	0.0138102	NA
Thalassospira profundimaris	1	0.0138102	NA
Thermobacillus composti	1	0.0138102	NA
Thermosynechococcus sp. NK55a	1	0.0138102	NA
Treponema azotonutricium	1	0.0138102	NA
Treponema brennaborense	1	0.0138102	NA
Treponema medium	1	0.0138102	NA
Treponema succinifaciens	1	0.0138102	NA
Trichococcus collinsii	1	0.0138102	NA
Truepera radiovictrix	1	0.0138102	NA
Tyzzerella nexilis	1	0.0138102	NA
Variovorax paradoxus	1	0.0138102	NA
Veillonella seminalis	1	0.0138102	NA
Verrucomicrobia bacterium IMCC26134	1	0.0138102	NA
Verrucomicrobiae bacterium DG1235	1	0.0138102	NA
Vibrio hepatarius	1	0.0138102	NA
Vibrio sp. AND4	1	0.0138102	NA
Vibrio tubiashii	1	0.0138102	NA
Weissella thailandensis	1	0.0138102	NA
Winogradskyella psychrotolerans	1	0.0138102	NA
Wolbachia endosymbiont of Laodelphax striatellus	1	0.0138102	NA
Xanthomonas fragariae	1	0.0138102	NA
Zobellia galactanivorans (strain DSM 12802 / CCUG 47099 / CIP 106680 / NCIMB 13871 / Dsij)	1	0.0138102	NA
Clostridioides difficile	NA	0.00156959	NA
Cutibacterium humerusii	NA	NA	2.66177e-05
Bacillus licheniformis	NA	NA	3.45563e-05
Paenibacillus_A barengoltzii	NA	NA	5.40881e-05
Enterococcus_C asini	NA	NA	8.55546e-05
Bacillus_AK	NA	NA	0.000146824
Microbacterium	NA	NA	0.000156196
Sphingomonas olei	NA	NA	0.000171167
Virgibacillus	NA	NA	0.000179313
Actinomyces	NA	NA	0.000193495
Longicatena caecimuris	NA	NA	0.000200753
Granulicatella adiacens	NA	NA	0.000204536
Staphylococcus pasteuri_A	NA	NA	0.000221231
Staphylococcus epidermidis	NA	NA	0.000234034
Oceanobacillus caeni	NA	NA	0.000264
Enterococcus_A xiangfangensis	NA	NA	0.000270603
Staphylococcus warneri	NA	NA	0.000364622
Bacillus_AC	NA	NA	0.000378333
Garciellaceae_NOV	NA	NA	0.000424937
Proteus mirabilis	NA	NA	0.000532231
Cutibacterium acnes	NA	NA	0.000584208
Atopostipes	NA	NA	0.000652024
UBA1191	NA	NA	0.000710911
Enterococcus_B hirae	NA	NA	0.000755085
Longibaculum muris	NA	NA	0.000761312
Lactococcus garvieae	NA	NA	0.000772647
Anaerosalibacter_A massiliensis	NA	NA	0.00083665
Lactobacillus rodentium	NA	NA	0.000858459
Paraclostridium bifermentans	NA	NA	0.000888097
Erysipelatoclostridium ramosum	NA	NA	0.000908636
Clostridium sartagoforme_B	NA	NA	0.000927818
Clostridium_Q symbiosum	NA	NA	0.000955131
Muricomes intestini	NA	NA	0.0010277
Streptococcus oralis	NA	NA	0.00103922
Atopobiaceae_NOV	NA	NA	0.00103928
Clostridium chromiireducens	NA	NA	0.00108915
Senegalia	NA	NA	0.00110716
Muricomes	NA	NA	0.00120763
Clostridium_G cochlearium	NA	NA	0.00121055
Bacillus_A cereus	NA	NA	0.00124171
Clostridium_F tepidum	NA	NA	0.00125373
Chlamydia muridarum	NA	NA	0.00132734
Citrobacter_A rodentium	NA	NA	0.00135729
Dorea muris	NA	NA	0.0013897
Frisingicoccus caecimuris	NA	NA	0.00138981
Cuneatibacter caecimuris	NA	NA	0.00142466
UBA11393_NOV	NA	NA	0.00152157
Rodentibacter heylii	NA	NA	0.00166013
Helicobacter_A bilis	NA	NA	0.00170383
Jeotgalicoccus nanhaiensis	NA	NA	0.00170432
Ruminococcus_C	NA	NA	0.0017576
Alistipes onderdonkii	NA	NA	0.00180688
Clostridium_P perfringens	NA	NA	0.00181398
Helicobacter_C magdeburgensis	NA	NA	0.00197085
Kosmotoga_B pacifica	NA	NA	0.00211177
Selenomonadaceae_NOV	NA	NA	0.00211234
Klebsiella_A oxytoca	NA	NA	0.00214542
Ligilactobacillus agilis	NA	NA	0.00229504
UBA7057	NA	NA	0.00240952
Klebsiella variicola	NA	NA	0.00241241
Pediococcus pentosaceus	NA	NA	0.0024251
Akkermansia	NA	NA	0.0027699
NHYN01	NA	NA	0.00278834
Intestinimonas butyriciproducens	NA	NA	0.00289783
UBA2730	NA	NA	0.0034589
Gastranaerophilaceae_NOV	NA	NA	0.00350578
Escherichia	NA	NA	0.00356954
UMGS1648	NA	NA	0.0037243
CAG-1427	NA	NA	0.00428746
Longicatena innocuum	NA	NA	0.00435473
UBA1820	NA	NA	0.00468304
CAG-822	NA	NA	0.00472515
Butyrivibrio_A	NA	NA	0.00487046
Caloranaerobacter azorensis	NA	NA	0.00498386
Staphylococcus_A sciuri	NA	NA	0.00519503
UBA7862	NA	NA	0.00549598
CAG-594	NA	NA	0.00558023
Eisenbergiella	NA	NA	0.00622397
Ruthenibacterium lactatiformans	NA	NA	0.00641649
Corynebacterium stationis	NA	NA	0.00642151
Ureaplasma	NA	NA	0.00645424
Anaerostipes	NA	NA	0.00688164
Christensenellales_NOV	NA	NA	0.00694585
UMGS1880	NA	NA	0.00700389
UBA11963	NA	NA	0.00723015
Weissella confusa	NA	NA	0.0072347
QANA01	NA	NA	0.00743797
CAG-145	NA	NA	0.00777048
C-53	NA	NA	0.00784023
Leuconostoc pseudomesenteroides	NA	NA	0.00790231
Lactiplantibacillus plantarum	NA	NA	0.00807663
UBA3789	NA	NA	0.00829454
Blautia_A	NA	NA	0.00836413
CAG-41	NA	NA	0.00838139
CAG-822_NOV	NA	NA	0.00889425
Parabacteroides merdae	NA	NA	0.00915054
UMGS995	NA	NA	0.0102776
Parvibacter caecicola	NA	NA	0.0106052
Lactobacillus hominis	NA	NA	0.0106083
Agathobacter	NA	NA	0.0107425
Butyricicoccus	NA	NA	0.0109929
Ruminococcus_E	NA	NA	0.0115209
UBA7177	NA	NA	0.0116551
Bacteroides xylanisolvens	NA	NA	0.012052
Enterococcus_B faecium	NA	NA	0.0124287
M3	NA	NA	0.0124987
UBA1405	NA	NA	0.0128015
CAG-274_NOV	NA	NA	0.0133853
CAG-632	NA	NA	0.013488
CHKCI006	NA	NA	0.0136252
Enterocloster aldenensis	NA	NA	0.0136663
CAG-611_NOV	NA	NA	0.0137066
Brachyspira	NA	NA	0.0138769
UBA3818	NA	NA	0.0146139
Enterococcus_D gallinarum	NA	NA	0.0147932
P3_NOV	NA	NA	0.0154393
UBA1381_NOV	NA	NA	0.0166337
CAG-1000_NOV	NA	NA	0.0166558
Tidjanibacter	NA	NA	0.0168046
D16-34	NA	NA	0.0174381
Adlercreutzia mucosicola	NA	NA	0.0175052
CAG-267	NA	NA	0.0178099
CAG-127	NA	NA	0.018283
Leuconostoc citreum	NA	NA	0.0184774
Ruminococcaceae_NOV	NA	NA	0.0188305
Ligilactobacillus	NA	NA	0.0197413
CAG-590	NA	NA	0.0201898
UBA11957	NA	NA	0.0203668
CAG-45	NA	NA	0.0205505
UBA710	NA	NA	0.0206786
Limosilactobacillus	NA	NA	0.0209998
CAG-196	NA	NA	0.0216228
Ruthenibacterium	NA	NA	0.0218736
UBA11517	NA	NA	0.022095
Eubacterium_J plexicaudatum	NA	NA	0.0224934
Alistipes_A	NA	NA	0.0225007
Helicobacter_C	NA	NA	0.0226689
Alistipes timonensis	NA	NA	0.023428
UBA5026	NA	NA	0.0241195
Erysipelatoclostridiaceae_NOV	NA	NA	0.024221
Anaerovoracaceae_NOV	NA	NA	0.0250426
Butyricimonas virosa	NA	NA	0.0255335
Acetatifactor muris	NA	NA	0.0261786
Helicobacter_C hepaticus	NA	NA	0.0262096
UBA5578	NA	NA	0.0269866
Paraprevotella	NA	NA	0.0272381
Enterococcus faecalis	NA	NA	0.0274525
UBA7160	NA	NA	0.0275434
UMGS1815	NA	NA	0.0280367
Helicobacter_C japonicus	NA	NA	0.0287174
Helicobacter_D apodemus	NA	NA	0.0291203
G11	NA	NA	0.0294308
Monoglobaceae_NOV	NA	NA	0.0297078
Zag111	NA	NA	0.0298329
Staphylococcus nepalensis	NA	NA	0.0299041
Mycoplasmoidaceae_NOV	NA	NA	0.0299647
Bifidobacterium animalis	NA	NA	0.030032
Zag1	NA	NA	0.0313269
Parvibacter	NA	NA	0.0314131
Mucispirillum	NA	NA	0.0314678
Emergencia	NA	NA	0.0356281
Rikenellaceae_NOV	NA	NA	0.0358481
Bacteroides faecichinchillae	NA	NA	0.0358688
CAG-110	NA	NA	0.0361643
Streptococcus	NA	NA	0.0362785
Enterobacter himalayensis	NA	NA	0.0374726
UBA7050	NA	NA	0.0381945
Evtepia	NA	NA	0.038437
Lactococcus lactis	NA	NA	0.0387936
CAG-776	NA	NA	0.0387982
Rikenella	NA	NA	0.0389378
Muribacter muris	NA	NA	0.0418852
CAG-273	NA	NA	0.0419458
CAG-475	NA	NA	0.0428704
Staphylococcus_A lentus	NA	NA	0.0430252
Helicobacter_D rodentium	NA	NA	0.0436631
Faecalibaculum	NA	NA	0.0441001
Ruminococcus	NA	NA	0.0447015
Parasutterella excrementihominis	NA	NA	0.0467632
UMGS1071	NA	NA	0.0494491
UMGS1217	NA	NA	0.0497611
Lactobacillus taiwanensis	NA	NA	0.0508756
Roseburia	NA	NA	0.0535753
Ileibacterium valens	NA	NA	0.0544199
AM07-15	NA	NA	0.055069
UBA1436	NA	NA	0.0574727
Romboutsia ilealis	NA	NA	0.0597255
CAG-180	NA	NA	0.062331
Adlercreutzia caecimuris	NA	NA	0.0650517
CAG-510	NA	NA	0.0651959
Clostridium	NA	NA	0.0660542
Phocaeicola dorei	NA	NA	0.0675293
Erysipelotrichaceae_NOV	NA	NA	0.0681587
Lactococcus lactis_E	NA	NA	0.0703327
Blautia coccoides_A	NA	NA	0.0713585
CAG-1435	NA	NA	0.07403
CAG-495	NA	NA	0.0741806
Parasutterella	NA	NA	0.0764852
Adlercreutzia	NA	NA	0.0778987
Flavonifractor	NA	NA	0.080913
Turicimonas muris	NA	NA	0.0845509
Lachnospira	NA	NA	0.0846634
UBA1394	NA	NA	0.0856049
UBA7185	NA	NA	0.0911765
AF33-28	NA	NA	0.0932974
Parabacteroides distasonis_A	NA	NA	0.0955665
Savagella	NA	NA	0.0957879
Treponema_D	NA	NA	0.0977297
Anaerotignum	NA	NA	0.0983236
An181	NA	NA	0.0998754
Helicobacter_D ganmani	NA	NA	0.101073
UBA2882	NA	NA	0.105392
UBA3700	NA	NA	0.107334
Turicibacter	NA	NA	0.110781
Helicobacter_C typhlonius	NA	NA	0.110914
CAG-81	NA	NA	0.114983
Dubosiella	NA	NA	0.116176
Ruminiclostridium_E	NA	NA	0.118544
Butyricicoccaceae_NOV	NA	NA	0.118668
NM07-P-09	NA	NA	0.120965
Clostridium_Q	NA	NA	0.125792
51-20	NA	NA	0.126439
CAG-582	NA	NA	0.130994
Lactobacillus intestinalis	NA	NA	0.134413
UMGS1004	NA	NA	0.14151
Phocaeicola sartorii	NA	NA	0.141791
D16-63	NA	NA	0.142
Erysipelatoclostridium cocleatum	NA	NA	0.147883
Marseille-P3106	NA	NA	0.153973
Eubacterium_G	NA	NA	0.158885
UBA946	NA	NA	0.162845
CAG-303	NA	NA	0.164479
Dubosiella newyorkensis	NA	NA	0.168835
Acutalibacter muris	NA	NA	0.175785
CAG-56	NA	NA	0.191101
ASF356	NA	NA	0.193464
Lactobacillus	NA	NA	0.193805
CAG-115	NA	NA	0.196539
Muribaculum arabinoxylanisolvens	NA	NA	0.209367
Escherichia flexneri	NA	NA	0.218328
Parabacteroides	NA	NA	0.220885
Limosilactobacillus reuteri	NA	NA	0.229019
Borkfalkiaceae_NOV	NA	NA	0.239841
Angelakisella	NA	NA	0.243451
UMGS1872	NA	NA	0.246546
Parabacteroides distasonis	NA	NA	0.250396
Limosilactobacillus reuteri_D	NA	NA	0.266539
Eubacterium_R	NA	NA	0.268737
CAG-552_NOV	NA	NA	0.269644
Bacteroides congonensis	NA	NA	0.270965
Rodentibacter pneumotropicus	NA	NA	0.292938
Parabacteroides goldsteinii	NA	NA	0.311344
Staphylococcus xylosus	NA	NA	0.316098
UBA3700_NOV	NA	NA	0.323507
CAG-603	NA	NA	0.331936
Mailhella	NA	NA	0.333971
Gastranaerophilales_NOV	NA	NA	0.338473
Bifidobacterium globosum	NA	NA	0.339843
Allobaculum	NA	NA	0.340132
1XD8-76	NA	NA	0.363802
Amulumruptor	NA	NA	0.387739
Acutalibacter	NA	NA	0.387899
UBA3263	NA	NA	0.393741
Prevotellamassilia	NA	NA	0.451906
Phocaeicola	NA	NA	0.45785
1XD42-69	NA	NA	0.489247
Muribaculaceae_NOV	NA	NA	0.495962
Akkermansia muciniphila_A	NA	NA	0.511716
Bacteroides caecimuris	NA	NA	0.515204
Bacteroides	NA	NA	0.518914
UMGS268	NA	NA	0.552904
Eubacterium_J	NA	NA	0.559597
Faecalibaculum rodentium	NA	NA	0.568666
UMGS1370	NA	NA	0.569749
Eubacterium_F	NA	NA	0.606133
UBA9502	NA	NA	0.624996
Schaedlerella	NA	NA	0.668057
Hungatella_A	NA	NA	0.674752
Muribaculum intestinale	NA	NA	0.69348
Duncaniella muris	NA	NA	0.724331
Odoribacter	NA	NA	0.793033
Paramuribaculum intestinale	NA	NA	0.862311
UBA11940	NA	NA	0.879242
UBA7182	NA	NA	0.936878
14-2	NA	NA	0.988062
Lawsonibacter	NA	NA	1.0583
Bacteroides acidifaciens	NA	NA	1.11535
TF01-11	NA	NA	1.26596
Phocaeicola vulgatus	NA	NA	1.38115
RC9	NA	NA	1.50432
UBA9475	NA	NA	1.54859
Ligilactobacillus murinus	NA	NA	1.55835
CAG-95	NA	NA	1.72046
Kineothrix	NA	NA	1.72632
Oscillospiraceae_NOV	NA	NA	1.97226
Akkermansia muciniphila	NA	NA	2.09398
Prevotella	NA	NA	2.32685
Muribaculum	NA	NA	2.44864
UBA7173	NA	NA	2.55822
UBA3282	NA	NA	2.5806
Acetatifactor	NA	NA	3.0543
Alistipes	NA	NA	3.40622
Lachnospiraceae_NOV	NA	NA	3.51644
Paramuribaculum	NA	NA	3.57231
Duncaniella	NA	NA	3.84047
CAG-873	NA	NA	3.95933
CAG-485	NA	NA	7.16569
COE1	NA	NA	7.17055
