# Supplementary material for: Increasing taxonomic and functional characterization of host-microbiome interactions by DIA-PASEF metaproteomics
Source: Front Microbiol. 2023 Oct 16;14:1258703. doi: 10.3389/fmicb.2023.1258703 (PMC10613666; doi:10.3389/fmicb.2023.1258703)
Supplement: Supplementary file 12 [file Table_5.XLSX]

## Sheet: CommonAnnotatedPathways
Microbiota						Host
KO number	KEGG_Pathway_Name	DDA-PASEF_mapped proteins (K number)	DIA-PASEF_mapped proteins (K number)			Gene Ontology Molecular function	DDA-PASEF_annotated protein numbers	DIA-PASEF_annotated protein numbers
ko01100	Metabolic pathways	314	366			oxidoreductase activity	85	147
ko01110	Biosynthesis of secondary metabolites	113	132			structural molecule activity	76	145
ko01120	Microbial metabolism in diverse environments	144	159			peptidase activity	59	81
ko01200	Carbon metabolism	81	90			calcium ion binding	58	80
ko00051	Fructose and mannose metabolism	17	24			protein kinase binding	54	62
ko00520	Amino sugar and nucleotide sugar metabolism	23	30			amide binding	42	48
ko02020	Two-component system	26	33			actin filament binding	32	46
ko00500	Starch and sucrose metabolism	28	34			lyase activity	23	43
ko00620	Pyruvate metabolism	33	39			cell adhesion molecule binding	31	40
ko01230	Biosynthesis of amino acids	42	47			protein heterodimerization activity	26	38
ko01250	Biosynthesis of nucleotide sugars	11	16			ubiquitin protein ligase binding	34	37
ko00220	Arginine biosynthesis	13	17			exopeptidase activity	24	33
ko00240	Pyrimidine metabolism	8	12			carboxylic ester hydrolase activity	20	30
ko00280	Valine, leucine and isoleucine degradation	14	18			proton transmembrane transporter activity	22	28
ko00541	O-Antigen nucleotide sugar biosynthesis	5	9			antioxidant activity	18	26
ko00640	Propanoate metabolism	28	32			electron transfer activity	13	25
ko00983	Drug metabolism - other enzymes	3	7			hydrolase activity, hydrolyzing O-glycosyl compounds	15	24
ko01212	Fatty acid metabolism	7	11			rRNA binding	12	23
ko02024	Quorum sensing	16	20			oxidoreductase activity, acting on the aldehyde or oxo group of donors, NAD or NADP as acceptor	15	22
ko02060	Phosphotransferase system (PTS)	9	13			protein N-terminus binding	13	18
ko00020	Citrate cycle (TCA cycle)	18	21			hydrolase activity, acting on carbon-nitrogen (but not peptide) bonds	16	17
ko00061	Fatty acid biosynthesis	3	6			oxidoreductase activity, acting on a sulfur group of donors	15	17
ko00250	Alanine, aspartate and glutamate metabolism	11	14			steroid binding	12	15
ko00680	Methane metabolism	27	30			structural constituent of chromatin	13	15
ko00720	Carbon fixation pathways in prokaryotes	35	38			calcium-dependent phospholipid binding	17	14
ko01210	2-Oxocarboxylic acid metabolism	21	24			proton-transporting ATP synthase activity, rotational mechanism	9	12
ko01232	Nucleotide metabolism	8	11			ADP binding	13	11
ko01240	Biosynthesis of cofactors	22	25			disordered domain specific binding	10	11
ko02010	ABC transporters	45	48			fatty acid binding	11	11
ko02040	Flagellar assembly	7	10			peptidoglycan binding	8	9
ko00071	Fatty acid degradation	8	10			carboxylesterase activity	6	7
ko00190	Oxidative phosphorylation	15	17			cell adhesion mediator activity	6	7
ko00230	Purine metabolism	16	18			lipopolysaccharide binding	6	7
ko00350	Tyrosine metabolism	6	8			acetyl-CoA C-acyltransferase activity	4	6
ko00910	Nitrogen metabolism	9	11			glutathione transferase activity	9	6
ko00920	Sulfur metabolism	9	11			protein-membrane adaptor activity	5	6
ko00970	Aminoacyl-tRNA biosynthesis	7	9			3-hydroxyacyl-CoA dehydrogenase activity	3	5
ko01220	Degradation of aromatic compounds	5	7			ankyrin binding	5	5
ko01501	beta-Lactam resistance	5	7			acyltransferase activity, acyl groups converted into alkyl on transfer	3	4
ko01503	Cationic antimicrobial peptide (CAMP)	4	6			alkylglycerophosphoethanolamine phosphodiesterase activity	4	4
ko03070	Bacterial secretion system	6	8			carbon-sulfur lyase activity	3	4
ko04142	Lysosome	3	5			chloride ion binding	4	4
ko00010	Glycolysis / Gluconeogenesis	34	35			dipeptidyl-peptidase activity	3	4
ko00030	Pentose phosphate pathway	15	16			galactoside binding	4	4
ko00195	Photosynthesis	3	4			nucleoside binding	3	4
ko00300	Lysine biosynthesis	5	6			oxidoreductase activity, acting on a sulfur group of donors, oxygen as acceptor	4	4
ko00340	Histidine metabolism	2	3			pyruvate dehydrogenase activity	4	4
ko00460	Cyanoamino acid metabolism	3	4			toxic substance binding	5	4
ko00480	Glutathione metabolism	4	5			phospholipase A2 inhibitor activity	3	3
ko00511	Other glycan degradation	7	8			retinyl-palmitate esterase activity	3	3
ko00521	Streptomycin biosynthesis	5	6			thyroid hormone binding	4	3
ko00523	Polyketide sugar unit biosynthesis	1	2
ko00531	Glycosaminoglycan degradation	3	4
ko00561	Glycerolipid metabolism	7	8
ko00564	Glycerophospholipid metabolism	3	4
ko00600	Sphingolipid metabolism	5	6
ko00625	Chloroalkane and chloroalkene degradation	4	5
ko00626	Naphthalene degradation	3	4
ko00630	Glyoxylate and dicarboxylate metabolism	27	28
ko00633	Nitrotoluene degradation	6	7
ko00650	Butanoate metabolism	28	29
ko00760	Nicotinate and nicotinamide metabolism	8	9
ko00780	Biotin metabolism	2	3
ko00830	Retinol metabolism	1	2
ko00946	Degradation of flavonoids	2	3
ko00980	Metabolism of xenobiotics by cytochrome P450	1	2
ko00982	Drug metabolism - cytochrome P450	1	2
ko00999	Biosynthesis of various plant secondary metabolites; Including: Crocin biosynthesis, Ginsenoside biosynthesis, Saponin adjuvant biosynthesis, Cannabidiol biosynthesis, Mugineic acid biosynthesis, Pentagalloylglucose biosynthesis, Benzoxazinoid biosynthesis, Gramine biosynthesis, Coumarin biosynthesis, Furanocoumarin biosynthesis, Hordatine biosynthesis, Podophyllotoxin biosynthesis	2	3
ko02030	Bacterial chemotaxis	10	11
ko03010	Ribosome	52	53
ko03030	DNA replication	3	4
ko03060	Protein export	5	6
ko03320	PPAR signaling pathway	3	4
ko04141	Protein processing in endoplasmic reticulum	1	2
ko04217	Necroptosis	3	4
ko04626	Plant-pathogen interaction	4	5
ko04964	Proximal tubule bicarbonate reclamation	1	2
ko05110	Vibrio cholerae infection	1	2
ko05111	Biofilm formation - Vibrio cholerae	5	6
ko05133	Pertussis	1	2
ko05146	Amoebiasis	1	2
ko05230	Central carbon metabolism in cancer	5	6
ko05415	Diabetic cardiomyopathy	1	2
ko00040	Pentose and glucuronate interconversions	18	18
ko00052	Galactose metabolism	15	15
ko00053	Ascorbate and aldarate metabolism	3	3
ko00260	Glycine, serine and threonine metabolism	18	18
ko00261	Monobactam biosynthesis	3	3
ko00270	Cysteine and methionine metabolism	14	14
ko00290	Valine, leucine and isoleucine biosynthesis	4	4
ko00310	Lysine degradation	9	9
ko00330	Arginine and proline metabolism	8	8
ko00360	Phenylalanine metabolism	4	4
ko00361	Chlorocyclohexane and chlorobenzene degradation	1	1
ko00362	Benzoate degradation	7	7
ko00364	Fluorobenzoate degradation	1	1
ko00380	Tryptophan metabolism	5	5
ko00400	Phenylalanine, tyrosine and tryptophan biosynthesis	3	3
ko00401	Novobiocin biosynthesis	1	1
ko00410	beta-Alanine metabolism	3	3
ko00430	Taurine and hypotaurine metabolism	9	9
ko00450	Selenocompound metabolism	5	5
ko00470	D-Amino acid metabolism	4	4
ko00513	Various types of N-glycan biosynthesis	1	1
ko00524	Neomycin, kanamycin and gentamicin biosynthesis	1	1
ko00550	Peptidoglycan biosynthesis	2	2
ko00562	Inositol phosphate metabolism	9	9
ko00603	Glycosphingolipid biosynthesis - globo and isoglobo series	2	2
ko00604	Glycosphingolipid biosynthesis - ganglio series	1	1
ko00623	Toluene degradation	1	1
ko00627	Aminobenzoate degradation	2	2
ko00643	Styrene degradation	5	5
ko00660	C5-Branched dibasic acid metabolism	1	1
ko00670	One carbon pool by folate	8	8
ko00710	Carbon fixation in photosynthetic organisms	10	10
ko00730	Thiamine metabolism	3	3
ko00750	Vitamin B6 metabolism	2	2
ko00770	Pantothenate and CoA biosynthesis	5	5
ko00785	Lipoic acid metabolism	4	4
ko00791	Atrazine degradation	3	3
ko00860	Porphyrin metabolism	1	1
ko00900	Terpenoid backbone biosynthesis	2	2
ko00907	Pinene, camphor and geraniol degradation	1	1
ko00930	Caprolactam degradation	1	1
ko00944	Flavone and flavonol biosynthesis	1	1
ko00950	Isoquinoline alkaloid biosynthesis	1	1
ko00960	Tropane, piperidine and pyridine alkaloid biosynthesis	1	1
ko00966	Glucosinolate biosynthesis	1	1
ko00998	Biosynthesis of various antibiotics; Including: Kanosamine biosynthesis, Aurachin biosynthesis, Bacilysin biosynthesis, Puromycin biosynthesis, Dapdiamides biosynthesis, Fosfomycin biosynthesis, Cremeomycin biosynthesis, Fumagillin biosynthesis, Pentalenolactone biosynthesis, Terpentecin biosynthesis, Roseoflavin biosynthesis, Cycloserine biosynthesis	1	1
ko01040	Biosynthesis of unsaturated fatty acids	1	1
ko01051	Biosynthesis of ansamycins	2	2
ko01052	Type I polyketide structures	1	1
ko01502	Vancomycin resistance	1	1
ko01523	Antifolate resistance	2	2
ko02025	Biofilm formation - Pseudomonas aeruginosa	1	1
ko02026	Biofilm formation - Escherichia coli	5	5
ko03018	RNA degradation	6	6
ko03020	RNA polymerase	5	5
ko03430	Mismatch repair	3	3
ko03440	Homologous recombination	3	3
ko04011	MAPK signaling pathway - yeast	1	1
ko04013	MAPK signaling pathway - fly	1	1
ko04016	MAPK signaling pathway - plant	1	1
ko04066	HIF-1 signaling pathway	5	5
ko04068	FoxO signaling pathway	3	3
ko04071	Sphingolipid signaling pathway	1	1
ko04112	Cell cycle - Caulobacter	2	2
ko04146	Peroxisome	4	4
ko04151	PI3K-Akt signaling pathway	2	2
ko04152	AMPK signaling pathway	2	2
ko04211	Longevity regulating pathway	2	2
ko04212	Longevity regulating pathway - worm	5	5
ko04213	Longevity regulating pathway - multiple species	3	3
ko04216	Ferroptosis	1	1
ko04612	Antigen processing and presentation	1	1
ko04621	NOD-like receptor signaling pathway	3	3
ko04622	RIG-I-like receptor signaling pathway	1	1
ko04657	IL-17 signaling pathway	1	1
ko04659	Th17 cell differentiation	1	1
ko04714	Thermogenesis	1	1
ko04724	Glutamatergic synapse	1	1
ko04727	GABAergic synapse	2	2
ko04910	Insulin signaling pathway	2	2
ko04914	Progesterone-mediated oocyte maturation	1	1
ko04915	Estrogen signaling pathway	1	1
ko04917	Prolactin signaling pathway	1	1
ko04919	Thyroid hormone signaling pathway	1	1
ko04920	Adipocytokine signaling pathway	2	2
ko04922	Glucagon signaling pathway	6	6
ko04930	Type II diabetes mellitus	1	1
ko04931	Insulin resistance	2	2
ko04940	Type I diabetes mellitus	2	2
ko04970	Salivary secretion	1	1
ko04972	Pancreatic secretion	1	1
ko04973	Carbohydrate digestion and absorption	1	1
ko04975	Fat digestion and absorption	1	1
ko05010	Alzheimer disease	1	1
ko05012	Parkinson disease	1	1
ko05014	Amyotrophic lateral sclerosis	1	1
ko05016	Huntington disease	1	1
ko05022	Pathways of neurodegeneration - multiple diseases	1	1
ko05100	Bacterial invasion of epithelial cells	2	2
ko05120	Epithelial cell signaling in Helicobacter pylori infection	2	2
ko05130	Pathogenic Escherichia coli infection	2	2
ko05131	Shigellosis	1	1
ko05132	Salmonella infection	4	4
ko05134	Legionellosis	3	3
ko05135	Yersinia infection	1	1
ko05143	African trypanosomiasis	1	1
ko05150	Staphylococcus aureus infection	2	2
ko05152	Tuberculosis	4	4
ko05165	Human papillomavirus infection	1	1
ko05200	Pathways in cancer	1	1
ko05203	Viral carcinogenesis	1	1
ko05207	Chemical carcinogenesis - receptor activation	1	1
ko05208	Chemical carcinogenesis - reactive oxygen species	2	2
ko05215	Prostate cancer	1	1
ko05417	Lipid and atherosclerosis	3	3
ko05418	Fluid shear stress and atherosclerosis	2	2
ko00790	Folate biosynthesis	5	2

## Sheet: UniquePathways-DIA-PASEF
Microbiota						Host
KO number	KEGG_Pathway_Name	DIA-PASEF_mapped proteins (K number)				Molecular function	DIA-PASEF_annotated protein numbers
ko00120	Primary bile acid biosynthesis	1				ribonucleoside triphosphate phosphatase activity	85
ko00121	Secondary bile acid biosynthesis	1				isomerase activity	35
ko00333	Prodigiosin biosynthesis	1				peptidase regulator activity	45
ko00440	Phosphonate and phosphinate metabolism	1				carbohydrate binding	45
ko00525	Acarbose and validamycin biosynthesis	1				flavin adenine dinucleotide binding	24
ko00563	Glycosylphosphatidylinositol (GPI)-anchor biosynthesis	1				structural constituent of cytoskeleton	21
ko00740	Riboflavin metabolism	1				ATP-dependent protein folding chaperone	12
ko00906	Carotenoid biosynthesis	1				structural constituent of skin epidermis	14
ko04122	Sulfur relay system	1				hydrolase activity, acting on ester bonds	74
ko04936	Alcoholic liver disease	1				protease binding	30
ko05219	Bladder cancer	1				oxidoreductase activity, acting on the CH-CH group of donors	16
						pyridoxal phosphate binding	14
						5.8S rRNA binding	5
						carboxypeptidase activity	12
						threonine-type endopeptidase activity	6
						P-type ion transporter activity	10
						metallodipeptidase activity	6
						microfilament motor activity	10
						carbon-carbon lyase activity	12
						large ribosomal subunit rRNA binding	5
						NADP binding	11
						peptidase activator activity	13
						porin activity	4
						S100 protein binding	6
						mRNA 5'-UTR binding	8
						ubiquitin ligase inhibitor activity	5
						ribonucleoprotein complex binding	23
						ubiquinol-cytochrome-c reductase activity	4
						purine deoxyribonucleotide binding	4
						arylesterase activity	4
						transmembrane transporter binding	20
						3 iron, 4 sulfur cluster binding	3
						succinate-CoA ligase activity	3
						sulfur compound binding	30
						heat shock protein binding	19
						molybdenum ion binding	4
						myosin V binding	6
						oxidoreductase activity, acting on a heme group of donors	5
						steroid dehydrogenase activity, acting on the CH-OH group of donors, NAD or NADP as acceptor	9
						magnesium ion binding	23
						modified amino acid binding	15
						calcium-dependent ATPase activity	3
						superoxide dismutase activity	3
						translation regulator activity	19
						laminin binding	7
						alcohol dehydrogenase [NAD(P)+] activity	4
						isocitrate dehydrogenase [NAD(P)+] activity	3
						aminoacylase activity	3
						palmitoyl-CoA oxidase activity	3
						acetyl-CoA hydrolase activity	3
						protein phosphatase binding	20
						cysteine-type endopeptidase activity	13
						high-density lipoprotein particle binding	4
						single-stranded DNA binding	15
						succinate transmembrane transporter activity	3
						beta-N-acetylhexosaminidase activity	3
						fructose binding	3
						intramolecular oxidoreductase activity, interconverting aldoses and ketoses	3
						malate dehydrogenase activity	3
						carnitine O-acyltransferase activity	3
						potassium ion binding	4
						alpha-catenin binding	4
						oxidoreductase activity, acting on the CH-NH group of donors	6
						carbohydrate kinase activity	5
						nucleoside diphosphate kinase activity	5
						aminophospholipid flippase activity	3
						mercury ion binding	3
						manganese ion binding	9
						aspartic-type endopeptidase activity	6
						aminoacyl-tRNA ligase activity	7
						chaperone binding	14
						mannosidase activity	4
						ATPase binding	12
						intramolecular transferase activity, phosphotransferases	3
						importin-alpha family protein binding	3
						selenium binding	3
						cobalamin binding	3

## Sheet: UniquePathways-DDA-PASEF
					Host
					Molecular function	DDA-PASEF_annotated protein numbers
					GTP binding	49
					NAD binding	17
					serine-type endopeptidase inhibitor activity	21
					G protein activity	13
					ATP-dependent activity	48
					aminopeptidase activity	11
					protein disulfide isomerase activity	7
					MHC class I protein binding	10
					unfolded protein binding	14
					transferase activity, transferring nitrogenous groups	7
					quaternary ammonium group binding	8
					peptidyl-dipeptidase activity	3
					fatty acid derivative binding	6
					kininogen binding	3
					dATP binding	3
					hydrolase activity, acting on carbon-nitrogen (but not peptide) bonds, in cyclic amidines	6
					double-stranded RNA binding	10
					protein tag	4
					phosphotransferase activity, nitrogenous group as acceptor	3
					structural constituent of postsynaptic actin cytoskeleton	3
					threonine-type peptidase activity	4
					protein tyrosine kinase binding	12
					GPI anchor binding	3
					pore-forming activity	6
					2 iron, 2 sulfur cluster binding	5
					oxygen binding	5
					translation elongation factor activity	4
					cadherin binding	8
					omega peptidase activity	3
					phosphatidylcholine transporter activity	4
					ATP transmembrane transporter activity	3
					small ribosomal subunit rRNA binding	3
					cytochrome-c oxidase activity	3
					dopamine receptor binding	4
					exogenous protein binding	5
					intermediate filament binding	3
					MHC class II protein complex binding	3
