# Supplementary material for: Increasing taxonomic and functional characterization of host-microbiome interactions by DIA-PASEF metaproteomics
Source: Front Microbiol. 2023 Oct 16;14:1258703. doi: 10.3389/fmicb.2023.1258703 (PMC10613666; doi:10.3389/fmicb.2023.1258703)
Supplement: Supplementary file 13 [file Table_6.XLSX]

## Sheet: Phylum
DDA-PASEF						DIA-PASEF
Phylum	KEGG_Pathway	Pathway name	Total peptide count			Phylum	KEGG_Pathway	Pathway name	Total peptide count
Acidobacteria	map03018	RNA degradation	1			Acidobacteria	map03018	RNA degradation	1
Acidobacteria	map04212	Longevity regulating pathway - worm	1			Acidobacteria	map04212	Longevity regulating pathway - worm	1
Acidobacteria	map05152	Tuberculosis	1			Acidobacteria	map05152	Tuberculosis	1
Actinobacteria	map00260	Glycine, serine and threonine metabolism	2			Actinobacteria	map00010	Glycolysis / Gluconeogenesis	4
Actinobacteria	map00330	Arginine and proline metabolism	2			Actinobacteria	map00020	Citrate cycle (TCA cycle)	2
Actinobacteria	map00620	Pyruvate metabolism	1			Actinobacteria	map00030	Pentose phosphate pathway	2
Actinobacteria	map00640	Propanoate metabolism	1			Actinobacteria	map00260	Glycine, serine and threonine metabolism	1
Actinobacteria	map00650	Butanoate metabolism	1			Actinobacteria	map00330	Arginine and proline metabolism	1
Actinobacteria	map01100	Metabolic pathways	3			Actinobacteria	map00500	Starch and sucrose metabolism	1
Actinobacteria	map01120	Microbial metabolism in diverse environments	1			Actinobacteria	map00511	Other glycan degradation	1
Actinobacteria	map02010	ABC transporters	1			Actinobacteria	map00520	Amino sugar and nucleotide sugar metabolism	1
Arthropoda	map02010	ABC transporters	2			Actinobacteria	map00600	Sphingolipid metabolism	1
Arthropoda	map02020	Two-component system	1			Actinobacteria	map00620	Pyruvate metabolism	3
Arthropoda	map02040	Flagellar assembly	1			Actinobacteria	map00640	Propanoate metabolism	1
Arthropoda	map03010	Ribosome	3			Actinobacteria	map00650	Butanoate metabolism	3
Arthropoda	map04621	NOD-like receptor signaling pathway	1			Actinobacteria	map00680	Methane metabolism	1
Arthropoda	map04626	Plant-pathogen interaction	1			Actinobacteria	map00710	Carbon fixation in photosynthetic organisms	1
Arthropoda	map05132	Salmonella infection	1			Actinobacteria	map00720	Carbon fixation pathways in prokaryotes	3
Arthropoda	map05134	Legionellosis	1			Actinobacteria	map01051	Biosynthesis of ansamycins	1
Ascomycota	map02020	Two-component system	3			Actinobacteria	map01100	Metabolic pathways	7
Ascomycota	map02040	Flagellar assembly	3			Actinobacteria	map01110	Biosynthesis of secondary metabolites	3
Ascomycota	map04621	NOD-like receptor signaling pathway	3			Actinobacteria	map01120	Microbial metabolism in diverse environments	7
Ascomycota	map04626	Plant-pathogen interaction	3			Actinobacteria	map01130		5
Ascomycota	map05132	Salmonella infection	3			Actinobacteria	map01200	Carbon metabolism	6
Ascomycota	map05134	Legionellosis	3			Actinobacteria	map01230	Biosynthesis of amino acids	2
Bacteroidetes	map00010	Glycolysis / Gluconeogenesis	145			Actinobacteria	map01501	beta-Lactam resistance	5
Bacteroidetes	map00020	Citrate cycle (TCA cycle)	88			Actinobacteria	map02010	ABC transporters	8
Bacteroidetes	map00030	Pentose phosphate pathway	5			Actinobacteria	map02020	Two-component system	4
Bacteroidetes	map00040	Pentose and glucuronate interconversions	18			Actinobacteria	map02024	Quorum sensing	7
Bacteroidetes	map00051	Fructose and mannose metabolism	26			Actinobacteria	map02040	Flagellar assembly	4
Bacteroidetes	map00052	Galactose metabolism	1			Actinobacteria	map03010	Ribosome	1
Bacteroidetes	map00061	Fatty acid biosynthesis	1			Actinobacteria	map03018	RNA degradation	1
Bacteroidetes	map00190	Oxidative phosphorylation	28			Actinobacteria	map04066	HIF-1 signaling pathway	1
Bacteroidetes	map00220	Arginine biosynthesis	30			Actinobacteria	map04142	Lysosome	1
Bacteroidetes	map00230	Purine metabolism	5			Actinobacteria	map04621	NOD-like receptor signaling pathway	4
Bacteroidetes	map00240	Pyrimidine metabolism	4			Actinobacteria	map04626	Plant-pathogen interaction	4
Bacteroidetes	map00250	Alanine, aspartate and glutamate metabolism	30			Actinobacteria	map05132	Salmonella infection	4
Bacteroidetes	map00260	Glycine, serine and threonine metabolism	18			Actinobacteria	map05134	Legionellosis	4
Bacteroidetes	map00270	Cysteine and methionine metabolism	4			Arthropoda	map00010	Glycolysis / Gluconeogenesis	1
Bacteroidetes	map00290	Valine, leucine and isoleucine biosynthesis	1			Arthropoda	map00710	Carbon fixation in photosynthetic organisms	1
Bacteroidetes	map00430	Taurine and hypotaurine metabolism	1			Arthropoda	map01100	Metabolic pathways	1
Bacteroidetes	map00460	Cyanoamino acid metabolism	2			Arthropoda	map01110	Biosynthesis of secondary metabolites	1
Bacteroidetes	map00480	Glutathione metabolism	1			Arthropoda	map01120	Microbial metabolism in diverse environments	1
Bacteroidetes	map00500	Starch and sucrose metabolism	8			Arthropoda	map01130		1
Bacteroidetes	map00520	Amino sugar and nucleotide sugar metabolism	1			Arthropoda	map01200	Carbon metabolism	1
Bacteroidetes	map00521	Streptomycin biosynthesis	3			Arthropoda	map01230	Biosynthesis of amino acids	1
Bacteroidetes	map00562	Inositol phosphate metabolism	11			Arthropoda	map01501	beta-Lactam resistance	1
Bacteroidetes	map00620	Pyruvate metabolism	100			Arthropoda	map02010	ABC transporters	2
Bacteroidetes	map00623	Toluene degradation	6			Arthropoda	map02020	Two-component system	1
Bacteroidetes	map00627	Aminobenzoate degradation	1			Arthropoda	map02024	Quorum sensing	2
Bacteroidetes	map00630	Glyoxylate and dicarboxylate metabolism	6			Arthropoda	map02040	Flagellar assembly	1
Bacteroidetes	map00640	Propanoate metabolism	1			Arthropoda	map03010	Ribosome	3
Bacteroidetes	map00650	Butanoate metabolism	64			Arthropoda	map04066	HIF-1 signaling pathway	1
Bacteroidetes	map00660	C5-Branched dibasic acid metabolism	1			Arthropoda	map04621	NOD-like receptor signaling pathway	1
Bacteroidetes	map00670	One carbon pool by folate	2			Arthropoda	map04626	Plant-pathogen interaction	1
Bacteroidetes	map00680	Methane metabolism	56			Arthropoda	map05010	Alzheimer disease	1
Bacteroidetes	map00710	Carbon fixation in photosynthetic organisms	112			Arthropoda	map05132	Salmonella infection	1
Bacteroidetes	map00720	Carbon fixation pathways in prokaryotes	106			Arthropoda	map05134	Legionellosis	1
Bacteroidetes	map00750	Vitamin B6 metabolism	8			Artverviricota	map02010	ABC transporters	1
Bacteroidetes	map00770	Pantothenate and CoA biosynthesis	1			Ascomycota	map00071	Fatty acid degradation	1
Bacteroidetes	map00780	Biotin metabolism	1			Ascomycota	map00072		1
Bacteroidetes	map00910	Nitrogen metabolism	32			Ascomycota	map00280	Valine, leucine and isoleucine degradation	1
Bacteroidetes	map01051	Biosynthesis of ansamycins	3			Ascomycota	map00310	Lysine degradation	1
Bacteroidetes	map01100	Metabolic pathways	296			Ascomycota	map00362	Benzoate degradation	1
Bacteroidetes	map01110	Biosynthesis of secondary metabolites	152			Ascomycota	map00380	Tryptophan metabolism	1
Bacteroidetes	map01120	Microbial metabolism in diverse environments	240			Ascomycota	map00500	Starch and sucrose metabolism	1
Bacteroidetes	map01130		192			Ascomycota	map00520	Amino sugar and nucleotide sugar metabolism	1
Bacteroidetes	map01200	Carbon metabolism	227			Ascomycota	map00620	Pyruvate metabolism	1
Bacteroidetes	map01210	2-Oxocarboxylic acid metabolism	1			Ascomycota	map00630	Glyoxylate and dicarboxylate metabolism	1
Bacteroidetes	map01212	Fatty acid metabolism	1			Ascomycota	map00640	Propanoate metabolism	1
Bacteroidetes	map01220	Degradation of aromatic compounds	6			Ascomycota	map00650	Butanoate metabolism	2
Bacteroidetes	map01230	Biosynthesis of amino acids	101			Ascomycota	map00720	Carbon fixation pathways in prokaryotes	1
Bacteroidetes	map01523	Antifolate resistance	2			Ascomycota	map00900	Terpenoid backbone biosynthesis	1
Bacteroidetes	map02010	ABC transporters	1			Ascomycota	map01100	Metabolic pathways	2
Bacteroidetes	map02020	Two-component system	1			Ascomycota	map01110	Biosynthesis of secondary metabolites	2
Bacteroidetes	map02024	Quorum sensing	1			Ascomycota	map01120	Microbial metabolism in diverse environments	1
Bacteroidetes	map02026	Biofilm formation - Escherichia coli	6			Ascomycota	map01130		1
Bacteroidetes	map02030	Bacterial chemotaxis	2			Ascomycota	map01200	Carbon metabolism	2
Bacteroidetes	map02040	Flagellar assembly	3			Ascomycota	map01212	Fatty acid metabolism	1
Bacteroidetes	map03010	Ribosome	304			Ascomycota	map02020	Two-component system	2
Bacteroidetes	map03018	RNA degradation	52			Ascomycota	map02026	Biofilm formation - Escherichia coli	1
Bacteroidetes	map03020	RNA polymerase	3			Ascomycota	map02040	Flagellar assembly	1
Bacteroidetes	map03060	Protein export	1			Ascomycota	map04621	NOD-like receptor signaling pathway	1
Bacteroidetes	map03070	Bacterial secretion system	1			Ascomycota	map04626	Plant-pathogen interaction	1
Bacteroidetes	map04013	MAPK signaling pathway - fly	1			Ascomycota	map05132	Salmonella infection	1
Bacteroidetes	map04066	HIF-1 signaling pathway	71			Ascomycota	map05134	Legionellosis	1
Bacteroidetes	map04068	FoxO signaling pathway	1			Bacteroidetes	map00010	Glycolysis / Gluconeogenesis	135
Bacteroidetes	map04146	Peroxisome	1			Bacteroidetes	map00020	Citrate cycle (TCA cycle)	80
Bacteroidetes	map04211	Longevity regulating pathway	1			Bacteroidetes	map00030	Pentose phosphate pathway	15
Bacteroidetes	map04212	Longevity regulating pathway - worm	11			Bacteroidetes	map00040	Pentose and glucuronate interconversions	24
Bacteroidetes	map04213	Longevity regulating pathway - multiple species	4			Bacteroidetes	map00051	Fructose and mannose metabolism	38
Bacteroidetes	map04217	Necroptosis	6			Bacteroidetes	map00052	Galactose metabolism	5
Bacteroidetes	map04621	NOD-like receptor signaling pathway	1			Bacteroidetes	map00061	Fatty acid biosynthesis	5
Bacteroidetes	map04626	Plant-pathogen interaction	1			Bacteroidetes	map00120	Primary bile acid biosynthesis	1
Bacteroidetes	map04910	Insulin signaling pathway	6			Bacteroidetes	map00121	Secondary bile acid biosynthesis	1
Bacteroidetes	map04922	Glucagon signaling pathway	6			Bacteroidetes	map00190	Oxidative phosphorylation	21
Bacteroidetes	map04931	Insulin resistance	6			Bacteroidetes	map00220	Arginine biosynthesis	33
Bacteroidetes	map04940	Type I diabetes mellitus	8			Bacteroidetes	map00230	Purine metabolism	35
Bacteroidetes	map05010	Alzheimer disease	30			Bacteroidetes	map00240	Pyrimidine metabolism	34
Bacteroidetes	map05016	Huntington disease	1			Bacteroidetes	map00250	Alanine, aspartate and glutamate metabolism	36
Bacteroidetes	map05132	Salmonella infection	1			Bacteroidetes	map00260	Glycine, serine and threonine metabolism	29
Bacteroidetes	map05134	Legionellosis	18			Bacteroidetes	map00270	Cysteine and methionine metabolism	8
Bacteroidetes	map05152	Tuberculosis	10			Bacteroidetes	map00290	Valine, leucine and isoleucine biosynthesis	4
Basidiomycota	map00010	Glycolysis / Gluconeogenesis	1			Bacteroidetes	map00330	Arginine and proline metabolism	1
Basidiomycota	map00020	Citrate cycle (TCA cycle)	1			Bacteroidetes	map00333	Prodigiosin biosynthesis	2
Basidiomycota	map00500	Starch and sucrose metabolism	1			Bacteroidetes	map00350	Tyrosine metabolism	1
Basidiomycota	map00520	Amino sugar and nucleotide sugar metabolism	1			Bacteroidetes	map00360	Phenylalanine metabolism	1
Basidiomycota	map00620	Pyruvate metabolism	1			Bacteroidetes	map00400	Phenylalanine, tyrosine and tryptophan biosynthesis	1
Basidiomycota	map00650	Butanoate metabolism	1			Bacteroidetes	map00401	Novobiocin biosynthesis	1
Basidiomycota	map00720	Carbon fixation pathways in prokaryotes	1			Bacteroidetes	map00410	beta-Alanine metabolism	3
Basidiomycota	map01100	Metabolic pathways	2			Bacteroidetes	map00430	Taurine and hypotaurine metabolism	6
Basidiomycota	map01110	Biosynthesis of secondary metabolites	1			Bacteroidetes	map00460	Cyanoamino acid metabolism	10
Basidiomycota	map01120	Microbial metabolism in diverse environments	1			Bacteroidetes	map00480	Glutathione metabolism	1
Basidiomycota	map01130		1			Bacteroidetes	map00500	Starch and sucrose metabolism	25
Basidiomycota	map01200	Carbon metabolism	1			Bacteroidetes	map00520	Amino sugar and nucleotide sugar metabolism	6
Basidiomycota	map02020	Two-component system	2			Bacteroidetes	map00521	Streptomycin biosynthesis	11
Basidiomycota	map02026	Biofilm formation - Escherichia coli	1			Bacteroidetes	map00524	Neomycin, kanamycin and gentamicin biosynthesis	1
Basidiomycota	map02040	Flagellar assembly	2			Bacteroidetes	map00531	Glycosaminoglycan degradation	1
Basidiomycota	map04621	NOD-like receptor signaling pathway	2			Bacteroidetes	map00562	Inositol phosphate metabolism	21
Basidiomycota	map04626	Plant-pathogen interaction	2			Bacteroidetes	map00600	Sphingolipid metabolism	3
Basidiomycota	map05132	Salmonella infection	2			Bacteroidetes	map00620	Pyruvate metabolism	106
Basidiomycota	map05134	Legionellosis	2			Bacteroidetes	map00623	Toluene degradation	1
Chloroflexi	map00010	Glycolysis / Gluconeogenesis	1			Bacteroidetes	map00627	Aminobenzoate degradation	4
Chloroflexi	map00051	Fructose and mannose metabolism	1			Bacteroidetes	map00630	Glyoxylate and dicarboxylate metabolism	13
Chloroflexi	map00562	Inositol phosphate metabolism	1			Bacteroidetes	map00640	Propanoate metabolism	3
Chloroflexi	map00710	Carbon fixation in photosynthetic organisms	1			Bacteroidetes	map00650	Butanoate metabolism	75
Chloroflexi	map01100	Metabolic pathways	1			Bacteroidetes	map00660	C5-Branched dibasic acid metabolism	4
Chloroflexi	map01110	Biosynthesis of secondary metabolites	1			Bacteroidetes	map00670	One carbon pool by folate	6
Chloroflexi	map01120	Microbial metabolism in diverse environments	1			Bacteroidetes	map00680	Methane metabolism	73
Chloroflexi	map01130		1			Bacteroidetes	map00710	Carbon fixation in photosynthetic organisms	102
Chloroflexi	map01200	Carbon metabolism	1			Bacteroidetes	map00720	Carbon fixation pathways in prokaryotes	121
Chloroflexi	map01230	Biosynthesis of amino acids	1			Bacteroidetes	map00750	Vitamin B6 metabolism	18
Deferribacteres	map00010	Glycolysis / Gluconeogenesis	7			Bacteroidetes	map00760	Nicotinate and nicotinamide metabolism	1
Deferribacteres	map00020	Citrate cycle (TCA cycle)	6			Bacteroidetes	map00770	Pantothenate and CoA biosynthesis	4
Deferribacteres	map00051	Fructose and mannose metabolism	1			Bacteroidetes	map00780	Biotin metabolism	5
Deferribacteres	map00190	Oxidative phosphorylation	3			Bacteroidetes	map00790	Folate biosynthesis	1
Deferribacteres	map00195	Photosynthesis	1			Bacteroidetes	map00910	Nitrogen metabolism	34
Deferribacteres	map00270	Cysteine and methionine metabolism	2			Bacteroidetes	map00940	Phenylpropanoid biosynthesis	5
Deferribacteres	map00280	Valine, leucine and isoleucine degradation	4			Bacteroidetes	map00950	Isoquinoline alkaloid biosynthesis	1
Deferribacteres	map00380	Tryptophan metabolism	2			Bacteroidetes	map00960	Tropane, piperidine and pyridine alkaloid biosynthesis	1
Deferribacteres	map00562	Inositol phosphate metabolism	1			Bacteroidetes	map00970	Aminoacyl-tRNA biosynthesis	3
Deferribacteres	map00620	Pyruvate metabolism	4			Bacteroidetes	map01040	Biosynthesis of unsaturated fatty acids	2
Deferribacteres	map00630	Glyoxylate and dicarboxylate metabolism	20			Bacteroidetes	map01051	Biosynthesis of ansamycins	4
Deferribacteres	map00640	Propanoate metabolism	4			Bacteroidetes	map01100	Metabolic pathways	365
Deferribacteres	map00650	Butanoate metabolism	2			Bacteroidetes	map01110	Biosynthesis of secondary metabolites	155
Deferribacteres	map00680	Methane metabolism	14			Bacteroidetes	map01120	Microbial metabolism in diverse environments	254
Deferribacteres	map00710	Carbon fixation in photosynthetic organisms	9			Bacteroidetes	map01130		207
Deferribacteres	map00720	Carbon fixation pathways in prokaryotes	6			Bacteroidetes	map01200	Carbon metabolism	236
Deferribacteres	map01100	Metabolic pathways	28			Bacteroidetes	map01210	2-Oxocarboxylic acid metabolism	5
Deferribacteres	map01110	Biosynthesis of secondary metabolites	13			Bacteroidetes	map01212	Fatty acid metabolism	5
Deferribacteres	map01120	Microbial metabolism in diverse environments	27			Bacteroidetes	map01220	Degradation of aromatic compounds	1
Deferribacteres	map01130		15			Bacteroidetes	map01230	Biosynthesis of amino acids	106
Deferribacteres	map01200	Carbon metabolism	29			Bacteroidetes	map01501	beta-Lactam resistance	2
Deferribacteres	map01230	Biosynthesis of amino acids	5			Bacteroidetes	map01503	Cationic antimicrobial peptide (CAMP) resistance	1
Deferribacteres	map02010	ABC transporters	1			Bacteroidetes	map01523	Antifolate resistance	6
Deferribacteres	map02020	Two-component system	10			Bacteroidetes	map02010	ABC transporters	3
Deferribacteres	map02040	Flagellar assembly	10			Bacteroidetes	map02020	Two-component system	2
Deferribacteres	map03010	Ribosome	2			Bacteroidetes	map02024	Quorum sensing	6
Deferribacteres	map03018	RNA degradation	1			Bacteroidetes	map02026	Biofilm formation - Escherichia coli	14
Deferribacteres	map04011	MAPK signaling pathway - yeast	2			Bacteroidetes	map02030	Bacterial chemotaxis	6
Deferribacteres	map04016	MAPK signaling pathway - plant	2			Bacteroidetes	map02040	Flagellar assembly	6
Deferribacteres	map04066	HIF-1 signaling pathway	4			Bacteroidetes	map03010	Ribosome	347
Deferribacteres	map04068	FoxO signaling pathway	2			Bacteroidetes	map03018	RNA degradation	64
Deferribacteres	map04146	Peroxisome	2			Bacteroidetes	map03020	RNA polymerase	23
Deferribacteres	map04211	Longevity regulating pathway	2			Bacteroidetes	map03030	DNA replication	1
Deferribacteres	map04212	Longevity regulating pathway - worm	3			Bacteroidetes	map03060	Protein export	3
Deferribacteres	map04213	Longevity regulating pathway - multiple species	2			Bacteroidetes	map03070	Bacterial secretion system	4
Deferribacteres	map04621	NOD-like receptor signaling pathway	10			Bacteroidetes	map03430	Mismatch repair	1
Deferribacteres	map04626	Plant-pathogen interaction	10			Bacteroidetes	map03440	Homologous recombination	1
Deferribacteres	map04940	Type I diabetes mellitus	1			Bacteroidetes	map04013	MAPK signaling pathway - fly	1
Deferribacteres	map05010	Alzheimer disease	4			Bacteroidetes	map04066	HIF-1 signaling pathway	48
Deferribacteres	map05014	Amyotrophic lateral sclerosis	2			Bacteroidetes	map04068	FoxO signaling pathway	1
Deferribacteres	map05132	Salmonella infection	10			Bacteroidetes	map04071	Sphingolipid signaling pathway	3
Deferribacteres	map05134	Legionellosis	13			Bacteroidetes	map04146	Peroxisome	1
Deferribacteres	map05152	Tuberculosis	1			Bacteroidetes	map04211	Longevity regulating pathway	1
Euglenozoa	map00010	Glycolysis / Gluconeogenesis	2			Bacteroidetes	map04212	Longevity regulating pathway - worm	22
Euglenozoa	map00710	Carbon fixation in photosynthetic organisms	2			Bacteroidetes	map04213	Longevity regulating pathway - multiple species	2
Euglenozoa	map01100	Metabolic pathways	2			Bacteroidetes	map04217	Necroptosis	14
Euglenozoa	map01110	Biosynthesis of secondary metabolites	2			Bacteroidetes	map04621	NOD-like receptor signaling pathway	1
Euglenozoa	map01120	Microbial metabolism in diverse environments	2			Bacteroidetes	map04626	Plant-pathogen interaction	2
Euglenozoa	map01130		2			Bacteroidetes	map04727	GABAergic synapse	3
Euglenozoa	map01200	Carbon metabolism	2			Bacteroidetes	map04910	Insulin signaling pathway	14
Euglenozoa	map01230	Biosynthesis of amino acids	2			Bacteroidetes	map04922	Glucagon signaling pathway	14
Euglenozoa	map04066	HIF-1 signaling pathway	2			Bacteroidetes	map04931	Insulin resistance	14
Euglenozoa	map05010	Alzheimer disease	2			Bacteroidetes	map04940	Type I diabetes mellitus	16
Euryarchaeota	map00511	Other glycan degradation	1			Bacteroidetes	map05010	Alzheimer disease	14
Euryarchaeota	map00550	Peptidoglycan biosynthesis	1			Bacteroidetes	map05016	Huntington disease	1
Euryarchaeota	map01100	Metabolic pathways	1			Bacteroidetes	map05132	Salmonella infection	1
Euryarchaeota	map01502	Vancomycin resistance	1			Bacteroidetes	map05133	Pertussis	1
Euryarchaeota	map02020	Two-component system	1			Bacteroidetes	map05134	Legionellosis	28
Euryarchaeota	map05100	Bacterial invasion of epithelial cells	1			Bacteroidetes	map05152	Tuberculosis	21
Fibrobacteres	map00010	Glycolysis / Gluconeogenesis	1			Basidiomycota	map00010	Glycolysis / Gluconeogenesis	1
Fibrobacteres	map00710	Carbon fixation in photosynthetic organisms	1			Basidiomycota	map00020	Citrate cycle (TCA cycle)	1
Fibrobacteres	map01100	Metabolic pathways	1			Basidiomycota	map00620	Pyruvate metabolism	1
Fibrobacteres	map01110	Biosynthesis of secondary metabolites	1			Basidiomycota	map00650	Butanoate metabolism	1
Fibrobacteres	map01120	Microbial metabolism in diverse environments	1			Basidiomycota	map00720	Carbon fixation pathways in prokaryotes	1
Fibrobacteres	map01130		1			Basidiomycota	map01100	Metabolic pathways	1
Fibrobacteres	map01200	Carbon metabolism	1			Basidiomycota	map01120	Microbial metabolism in diverse environments	1
Fibrobacteres	map01230	Biosynthesis of amino acids	1			Basidiomycota	map01130		1
Fibrobacteres	map04066	HIF-1 signaling pathway	1			Basidiomycota	map01200	Carbon metabolism	1
Fibrobacteres	map05010	Alzheimer disease	1			Basidiomycota	map02020	Two-component system	4
Firmicutes	map00010	Glycolysis / Gluconeogenesis	2527			Basidiomycota	map02040	Flagellar assembly	4
Firmicutes	map00020	Citrate cycle (TCA cycle)	1108			Basidiomycota	map04621	NOD-like receptor signaling pathway	4
Firmicutes	map00030	Pentose phosphate pathway	566			Basidiomycota	map04626	Plant-pathogen interaction	4
Firmicutes	map00040	Pentose and glucuronate interconversions	163			Basidiomycota	map05132	Salmonella infection	4
Firmicutes	map00051	Fructose and mannose metabolism	995			Basidiomycota	map05134	Legionellosis	4
Firmicutes	map00052	Galactose metabolism	310			Candidatus Jorgensenbacteria	map03010	Ribosome	1
Firmicutes	map00053	Ascorbate and aldarate metabolism	45			Chlamydiae	map00010	Glycolysis / Gluconeogenesis	1
Firmicutes	map00061	Fatty acid biosynthesis	7			Chlamydiae	map00260	Glycine, serine and threonine metabolism	1
Firmicutes	map00071	Fatty acid degradation	456			Chlamydiae	map00480	Glutathione metabolism	1
Firmicutes	map00072		169			Chlamydiae	map00680	Methane metabolism	1
Firmicutes	map00190	Oxidative phosphorylation	257			Chlamydiae	map01100	Metabolic pathways	2
Firmicutes	map00195	Photosynthesis	112			Chlamydiae	map01110	Biosynthesis of secondary metabolites	1
Firmicutes	map00220	Arginine biosynthesis	145			Chlamydiae	map01120	Microbial metabolism in diverse environments	1
Firmicutes	map00230	Purine metabolism	186			Chlamydiae	map01130		1
Firmicutes	map00240	Pyrimidine metabolism	98			Chlamydiae	map01200	Carbon metabolism	1
Firmicutes	map00250	Alanine, aspartate and glutamate metabolism	191			Chlamydiae	map01230	Biosynthesis of amino acids	1
Firmicutes	map00260	Glycine, serine and threonine metabolism	89			Chlorobi	map02024	Quorum sensing	1
Firmicutes	map00261	Monobactam biosynthesis	13			Chlorobi	map03060	Protein export	1
Firmicutes	map00270	Cysteine and methionine metabolism	35			Chlorobi	map03070	Bacterial secretion system	1
Firmicutes	map00280	Valine, leucine and isoleucine degradation	446			Chloroflexi	map00010	Glycolysis / Gluconeogenesis	1
Firmicutes	map00290	Valine, leucine and isoleucine biosynthesis	157			Chloroflexi	map00051	Fructose and mannose metabolism	1
Firmicutes	map00300	Lysine biosynthesis	15			Chloroflexi	map00270	Cysteine and methionine metabolism	3
Firmicutes	map00310	Lysine degradation	186			Chloroflexi	map00280	Valine, leucine and isoleucine degradation	3
Firmicutes	map00330	Arginine and proline metabolism	17			Chloroflexi	map00290	Valine, leucine and isoleucine biosynthesis	3
Firmicutes	map00340	Histidine metabolism	32			Chloroflexi	map00562	Inositol phosphate metabolism	1
Firmicutes	map00350	Tyrosine metabolism	17			Chloroflexi	map00670	One carbon pool by folate	1
Firmicutes	map00360	Phenylalanine metabolism	82			Chloroflexi	map00710	Carbon fixation in photosynthetic organisms	1
Firmicutes	map00362	Benzoate degradation	278			Chloroflexi	map00720	Carbon fixation pathways in prokaryotes	1
Firmicutes	map00380	Tryptophan metabolism	171			Chloroflexi	map00770	Pantothenate and CoA biosynthesis	3
Firmicutes	map00400	Phenylalanine, tyrosine and tryptophan biosynthesis	14			Chloroflexi	map00790	Folate biosynthesis	3
Firmicutes	map00430	Taurine and hypotaurine metabolism	74			Chloroflexi	map01100	Metabolic pathways	5
Firmicutes	map00450	Selenocompound metabolism	4			Chloroflexi	map01110	Biosynthesis of secondary metabolites	4
Firmicutes	map00460	Cyanoamino acid metabolism	31			Chloroflexi	map01120	Microbial metabolism in diverse environments	2
Firmicutes	map00471		126			Chloroflexi	map01130		4
Firmicutes	map00472		7			Chloroflexi	map01200	Carbon metabolism	2
Firmicutes	map00473		7			Chloroflexi	map01210	2-Oxocarboxylic acid metabolism	3
Firmicutes	map00480	Glutathione metabolism	43			Chloroflexi	map01230	Biosynthesis of amino acids	4
Firmicutes	map00500	Starch and sucrose metabolism	447			Chlorophyta	map02020	Two-component system	2
Firmicutes	map00511	Other glycan degradation	19			Chlorophyta	map02040	Flagellar assembly	2
Firmicutes	map00520	Amino sugar and nucleotide sugar metabolism	314			Chlorophyta	map04621	NOD-like receptor signaling pathway	2
Firmicutes	map00521	Streptomycin biosynthesis	53			Chlorophyta	map04626	Plant-pathogen interaction	2
Firmicutes	map00523	Polyketide sugar unit biosynthesis	11			Chlorophyta	map05132	Salmonella infection	2
Firmicutes	map00524	Neomycin, kanamycin and gentamicin biosynthesis	1			Chlorophyta	map05134	Legionellosis	2
Firmicutes	map00561	Glycerolipid metabolism	34			Chordata	map00680	Methane metabolism	1
Firmicutes	map00562	Inositol phosphate metabolism	553			Chordata	map00720	Carbon fixation pathways in prokaryotes	1
Firmicutes	map00564	Glycerophospholipid metabolism	7			Chordata	map01120	Microbial metabolism in diverse environments	1
Firmicutes	map00600	Sphingolipid metabolism	14			Chordata	map01200	Carbon metabolism	1
Firmicutes	map00603	Glycosphingolipid biosynthesis - globo and isoglobo series	1			Chordata	map02010	ABC transporters	1
Firmicutes	map00620	Pyruvate metabolism	2565			Cyanobacteria	map00620	Pyruvate metabolism	1
Firmicutes	map00625	Chloroalkane and chloroalkene degradation	15			Cyanobacteria	map00640	Propanoate metabolism	1
Firmicutes	map00626	Naphthalene degradation	15			Cyanobacteria	map00650	Butanoate metabolism	1
Firmicutes	map00630	Glyoxylate and dicarboxylate metabolism	236			Cyanobacteria	map01100	Metabolic pathways	1
Firmicutes	map00633	Nitrotoluene degradation	57			Cyanobacteria	map01120	Microbial metabolism in diverse environments	1
Firmicutes	map00640	Propanoate metabolism	843			Cyanobacteria	map02010	ABC transporters	2
Firmicutes	map00643	Styrene degradation	48			Deferribacteres	map00010	Glycolysis / Gluconeogenesis	23
Firmicutes	map00650	Butanoate metabolism	1642			Deferribacteres	map00020	Citrate cycle (TCA cycle)	16
Firmicutes	map00660	C5-Branched dibasic acid metabolism	1			Deferribacteres	map00030	Pentose phosphate pathway	6
Firmicutes	map00670	One carbon pool by folate	40			Deferribacteres	map00051	Fructose and mannose metabolism	8
Firmicutes	map00680	Methane metabolism	588			Deferribacteres	map00052	Galactose metabolism	2
Firmicutes	map00710	Carbon fixation in photosynthetic organisms	2272			Deferribacteres	map00061	Fatty acid biosynthesis	3
Firmicutes	map00720	Carbon fixation pathways in prokaryotes	1301			Deferribacteres	map00190	Oxidative phosphorylation	16
Firmicutes	map00730	Thiamine metabolism	21			Deferribacteres	map00195	Photosynthesis	8
Firmicutes	map00750	Vitamin B6 metabolism	12			Deferribacteres	map00270	Cysteine and methionine metabolism	6
Firmicutes	map00760	Nicotinate and nicotinamide metabolism	6			Deferribacteres	map00280	Valine, leucine and isoleucine degradation	11
Firmicutes	map00770	Pantothenate and CoA biosynthesis	157			Deferribacteres	map00380	Tryptophan metabolism	4
Firmicutes	map00780	Biotin metabolism	3			Deferribacteres	map00562	Inositol phosphate metabolism	2
Firmicutes	map00790	Folate biosynthesis	8			Deferribacteres	map00620	Pyruvate metabolism	17
Firmicutes	map00900	Terpenoid backbone biosynthesis	268			Deferribacteres	map00630	Glyoxylate and dicarboxylate metabolism	37
Firmicutes	map00910	Nitrogen metabolism	190			Deferribacteres	map00633	Nitrotoluene degradation	8
Firmicutes	map00920	Sulfur metabolism	29			Deferribacteres	map00640	Propanoate metabolism	14
Firmicutes	map00940	Phenylpropanoid biosynthesis	20			Deferribacteres	map00650	Butanoate metabolism	5
Firmicutes	map00970	Aminoacyl-tRNA biosynthesis	8			Deferribacteres	map00680	Methane metabolism	30
Firmicutes	map00983	Drug metabolism - other enzymes	2			Deferribacteres	map00710	Carbon fixation in photosynthetic organisms	23
Firmicutes	map01051	Biosynthesis of ansamycins	37			Deferribacteres	map00720	Carbon fixation pathways in prokaryotes	16
Firmicutes	map01100	Metabolic pathways	6115			Deferribacteres	map00910	Nitrogen metabolism	5
Firmicutes	map01110	Biosynthesis of secondary metabolites	3414			Deferribacteres	map01100	Metabolic pathways	77
Firmicutes	map01120	Microbial metabolism in diverse environments	4764			Deferribacteres	map01110	Biosynthesis of secondary metabolites	39
Firmicutes	map01130		3200			Deferribacteres	map01120	Microbial metabolism in diverse environments	77
Firmicutes	map01200	Carbon metabolism	3777			Deferribacteres	map01130		46
Firmicutes	map01210	2-Oxocarboxylic acid metabolism	213			Deferribacteres	map01200	Carbon metabolism	68
Firmicutes	map01212	Fatty acid metabolism	444			Deferribacteres	map01212	Fatty acid metabolism	3
Firmicutes	map01220	Degradation of aromatic compounds	49			Deferribacteres	map01230	Biosynthesis of amino acids	16
Firmicutes	map01230	Biosynthesis of amino acids	1477			Deferribacteres	map02010	ABC transporters	5
Firmicutes	map01501	beta-Lactam resistance	39			Deferribacteres	map02020	Two-component system	37
Firmicutes	map01523	Antifolate resistance	12			Deferribacteres	map02024	Quorum sensing	3
Firmicutes	map02010	ABC transporters	692			Deferribacteres	map02040	Flagellar assembly	34
Firmicutes	map02020	Two-component system	927			Deferribacteres	map03010	Ribosome	4
Firmicutes	map02024	Quorum sensing	111			Deferribacteres	map03018	RNA degradation	15
Firmicutes	map02026	Biofilm formation - Escherichia coli	284			Deferribacteres	map04011	MAPK signaling pathway - yeast	4
Firmicutes	map02030	Bacterial chemotaxis	263			Deferribacteres	map04016	MAPK signaling pathway - plant	4
Firmicutes	map02040	Flagellar assembly	661			Deferribacteres	map04066	HIF-1 signaling pathway	8
Firmicutes	map02060	Phosphotransferase system (PTS)	14			Deferribacteres	map04068	FoxO signaling pathway	4
Firmicutes	map03010	Ribosome	2375			Deferribacteres	map04146	Peroxisome	4
Firmicutes	map03018	RNA degradation	425			Deferribacteres	map04152	AMPK signaling pathway	2
Firmicutes	map03020	RNA polymerase	84			Deferribacteres	map04211	Longevity regulating pathway	4
Firmicutes	map03030	DNA replication	37			Deferribacteres	map04212	Longevity regulating pathway - worm	15
Firmicutes	map03060	Protein export	1			Deferribacteres	map04213	Longevity regulating pathway - multiple species	4
Firmicutes	map03070	Bacterial secretion system	1			Deferribacteres	map04621	NOD-like receptor signaling pathway	34
Firmicutes	map03320	PPAR signaling pathway	47			Deferribacteres	map04626	Plant-pathogen interaction	34
Firmicutes	map03430	Mismatch repair	37			Deferribacteres	map04940	Type I diabetes mellitus	11
Firmicutes	map03440	Homologous recombination	37			Deferribacteres	map05010	Alzheimer disease	6
Firmicutes	map04066	HIF-1 signaling pathway	410			Deferribacteres	map05014	Amyotrophic lateral sclerosis	4
Firmicutes	map04068	FoxO signaling pathway	20			Deferribacteres	map05132	Salmonella infection	34
Firmicutes	map04112	Cell cycle - Caulobacter	6			Deferribacteres	map05134	Legionellosis	50
Firmicutes	map04141	Protein processing in endoplasmic reticulum	71			Deferribacteres	map05152	Tuberculosis	11
Firmicutes	map04142	Lysosome	7			Deferribacteres	map05230	Central carbon metabolism in cancer	2
Firmicutes	map04146	Peroxisome	39			Euglenozoa	map00010	Glycolysis / Gluconeogenesis	3
Firmicutes	map04151	PI3K-Akt signaling pathway	91			Euglenozoa	map00710	Carbon fixation in photosynthetic organisms	3
Firmicutes	map04152	AMPK signaling pathway	30			Euglenozoa	map01100	Metabolic pathways	3
Firmicutes	map04212	Longevity regulating pathway - worm	345			Euglenozoa	map01110	Biosynthesis of secondary metabolites	3
Firmicutes	map04216	Ferroptosis	4			Euglenozoa	map01120	Microbial metabolism in diverse environments	3
Firmicutes	map04217	Necroptosis	284			Euglenozoa	map01130		3
Firmicutes	map04612	Antigen processing and presentation	71			Euglenozoa	map01200	Carbon metabolism	3
Firmicutes	map04621	NOD-like receptor signaling pathway	709			Euglenozoa	map01230	Biosynthesis of amino acids	3
Firmicutes	map04626	Plant-pathogen interaction	732			Euglenozoa	map04066	HIF-1 signaling pathway	3
Firmicutes	map04657	IL-17 signaling pathway	71			Euglenozoa	map05010	Alzheimer disease	3
Firmicutes	map04659	Th17 cell differentiation	71			Euryarchaeota	map00010	Glycolysis / Gluconeogenesis	3
Firmicutes	map04714	Thermogenesis	4			Euryarchaeota	map00020	Citrate cycle (TCA cycle)	3
Firmicutes	map04724	Glutamatergic synapse	4			Euryarchaeota	map00511	Other glycan degradation	1
Firmicutes	map04727	GABAergic synapse	4			Euryarchaeota	map00550	Peptidoglycan biosynthesis	1
Firmicutes	map04910	Insulin signaling pathway	103			Euryarchaeota	map00620	Pyruvate metabolism	3
Firmicutes	map04914	Progesterone-mediated oocyte maturation	71			Euryarchaeota	map00710	Carbon fixation in photosynthetic organisms	2
Firmicutes	map04915	Estrogen signaling pathway	71			Euryarchaeota	map01100	Metabolic pathways	4
Firmicutes	map04917	Prolactin signaling pathway	2			Euryarchaeota	map01110	Biosynthesis of secondary metabolites	3
Firmicutes	map04920	Adipocytokine signaling pathway	24			Euryarchaeota	map01120	Microbial metabolism in diverse environments	3
Firmicutes	map04922	Glucagon signaling pathway	135			Euryarchaeota	map01130		3
Firmicutes	map04930	Type II diabetes mellitus	19			Euryarchaeota	map01200	Carbon metabolism	2
Firmicutes	map04931	Insulin resistance	103			Euryarchaeota	map01502	Vancomycin resistance	1
Firmicutes	map04940	Type I diabetes mellitus	255			Euryarchaeota	map02020	Two-component system	1
Firmicutes	map04964	Proximal tubule bicarbonate reclamation	146			Euryarchaeota	map03018	RNA degradation	1
Firmicutes	map05010	Alzheimer disease	339			Euryarchaeota	map03320	PPAR signaling pathway	1
Firmicutes	map05132	Salmonella infection	638			Euryarchaeota	map04068	FoxO signaling pathway	1
Firmicutes	map05134	Legionellosis	899			Euryarchaeota	map04151	PI3K-Akt signaling pathway	1
Firmicutes	map05152	Tuberculosis	339			Euryarchaeota	map04152	AMPK signaling pathway	1
Firmicutes	map05165	Human papillomavirus infection	19			Euryarchaeota	map04212	Longevity regulating pathway - worm	1
Firmicutes	map05200	Pathways in cancer	71			Euryarchaeota	map04910	Insulin signaling pathway	1
Firmicutes	map05203	Viral carcinogenesis	19			Euryarchaeota	map04920	Adipocytokine signaling pathway	1
Firmicutes	map05215	Prostate cancer	71			Euryarchaeota	map04922	Glucagon signaling pathway	1
Firmicutes	map05230	Central carbon metabolism in cancer	31			Euryarchaeota	map04931	Insulin resistance	1
Firmicutes	map05418	Fluid shear stress and atherosclerosis	71			Euryarchaeota	map04964	Proximal tubule bicarbonate reclamation	1
Platyhelminthes	map00230	Purine metabolism	1			Euryarchaeota	map05100	Bacterial invasion of epithelial cells	1
Platyhelminthes	map00240	Pyrimidine metabolism	1			Euryarchaeota	map05152	Tuberculosis	1
Platyhelminthes	map00511	Other glycan degradation	1			Evosea	map00480	Glutathione metabolism	1
Platyhelminthes	map00550	Peptidoglycan biosynthesis	1			Evosea	map01100	Metabolic pathways	1
Platyhelminthes	map00730	Thiamine metabolism	1			Fibrobacteres	map00010	Glycolysis / Gluconeogenesis	1
Platyhelminthes	map00760	Nicotinate and nicotinamide metabolism	1			Fibrobacteres	map00710	Carbon fixation in photosynthetic organisms	1
Platyhelminthes	map00790	Folate biosynthesis	1			Fibrobacteres	map01100	Metabolic pathways	1
Platyhelminthes	map01100	Metabolic pathways	2			Fibrobacteres	map01110	Biosynthesis of secondary metabolites	1
Platyhelminthes	map01110	Biosynthesis of secondary metabolites	1			Fibrobacteres	map01120	Microbial metabolism in diverse environments	1
Platyhelminthes	map01502	Vancomycin resistance	1			Fibrobacteres	map01130		1
Platyhelminthes	map02020	Two-component system	2			Fibrobacteres	map01200	Carbon metabolism	1
Platyhelminthes	map05100	Bacterial invasion of epithelial cells	1			Fibrobacteres	map01230	Biosynthesis of amino acids	1
Porifera	map02020	Two-component system	2			Fibrobacteres	map04066	HIF-1 signaling pathway	1
Porifera	map02040	Flagellar assembly	2			Fibrobacteres	map05010	Alzheimer disease	1
Porifera	map04621	NOD-like receptor signaling pathway	2			Firmicutes	map00010	Glycolysis / Gluconeogenesis	1868
Porifera	map04626	Plant-pathogen interaction	2			Firmicutes	map00020	Citrate cycle (TCA cycle)	790
Porifera	map05132	Salmonella infection	2			Firmicutes	map00030	Pentose phosphate pathway	462
Porifera	map05134	Legionellosis	2			Firmicutes	map00040	Pentose and glucuronate interconversions	132
Proteobacteria	map00010	Glycolysis / Gluconeogenesis	10			Firmicutes	map00051	Fructose and mannose metabolism	755
Proteobacteria	map00020	Citrate cycle (TCA cycle)	2			Firmicutes	map00052	Galactose metabolism	279
Proteobacteria	map00030	Pentose phosphate pathway	5			Firmicutes	map00053	Ascorbate and aldarate metabolism	22
Proteobacteria	map00040	Pentose and glucuronate interconversions	1			Firmicutes	map00061	Fatty acid biosynthesis	19
Proteobacteria	map00051	Fructose and mannose metabolism	4			Firmicutes	map00071	Fatty acid degradation	308
Proteobacteria	map00052	Galactose metabolism	2			Firmicutes	map00072		105
Proteobacteria	map00071	Fatty acid degradation	4			Firmicutes	map00121	Secondary bile acid biosynthesis	3
Proteobacteria	map00072		4			Firmicutes	map00190	Oxidative phosphorylation	212
Proteobacteria	map00190	Oxidative phosphorylation	1			Firmicutes	map00195	Photosynthesis	77
Proteobacteria	map00195	Photosynthesis	1			Firmicutes	map00220	Arginine biosynthesis	193
Proteobacteria	map00220	Arginine biosynthesis	4			Firmicutes	map00230	Purine metabolism	310
Proteobacteria	map00230	Purine metabolism	6			Firmicutes	map00240	Pyrimidine metabolism	118
Proteobacteria	map00240	Pyrimidine metabolism	1			Firmicutes	map00250	Alanine, aspartate and glutamate metabolism	215
Proteobacteria	map00250	Alanine, aspartate and glutamate metabolism	4			Firmicutes	map00260	Glycine, serine and threonine metabolism	102
Proteobacteria	map00261	Monobactam biosynthesis	4			Firmicutes	map00261	Monobactam biosynthesis	34
Proteobacteria	map00280	Valine, leucine and isoleucine degradation	4			Firmicutes	map00270	Cysteine and methionine metabolism	80
Proteobacteria	map00310	Lysine degradation	4			Firmicutes	map00280	Valine, leucine and isoleucine degradation	308
Proteobacteria	map00362	Benzoate degradation	4			Firmicutes	map00290	Valine, leucine and isoleucine biosynthesis	94
Proteobacteria	map00380	Tryptophan metabolism	4			Firmicutes	map00300	Lysine biosynthesis	44
Proteobacteria	map00430	Taurine and hypotaurine metabolism	7			Firmicutes	map00310	Lysine degradation	122
Proteobacteria	map00450	Selenocompound metabolism	4			Firmicutes	map00330	Arginine and proline metabolism	38
Proteobacteria	map00471		2			Firmicutes	map00333	Prodigiosin biosynthesis	8
Proteobacteria	map00500	Starch and sucrose metabolism	2			Firmicutes	map00340	Histidine metabolism	20
Proteobacteria	map00520	Amino sugar and nucleotide sugar metabolism	2			Firmicutes	map00350	Tyrosine metabolism	27
Proteobacteria	map00521	Streptomycin biosynthesis	1			Firmicutes	map00360	Phenylalanine metabolism	89
Proteobacteria	map00620	Pyruvate metabolism	17			Firmicutes	map00362	Benzoate degradation	246
Proteobacteria	map00630	Glyoxylate and dicarboxylate metabolism	5			Firmicutes	map00380	Tryptophan metabolism	111
Proteobacteria	map00633	Nitrotoluene degradation	1			Firmicutes	map00400	Phenylalanine, tyrosine and tryptophan biosynthesis	14
Proteobacteria	map00640	Propanoate metabolism	14			Firmicutes	map00430	Taurine and hypotaurine metabolism	64
Proteobacteria	map00650	Butanoate metabolism	16			Firmicutes	map00450	Selenocompound metabolism	5
Proteobacteria	map00670	One carbon pool by folate	1			Firmicutes	map00460	Cyanoamino acid metabolism	39
Proteobacteria	map00680	Methane metabolism	7			Firmicutes	map00471		141
Proteobacteria	map00710	Carbon fixation in photosynthetic organisms	6			Firmicutes	map00472		11
Proteobacteria	map00720	Carbon fixation pathways in prokaryotes	13			Firmicutes	map00473		9
Proteobacteria	map00760	Nicotinate and nicotinamide metabolism	4			Firmicutes	map00480	Glutathione metabolism	55
Proteobacteria	map00900	Terpenoid backbone biosynthesis	4			Firmicutes	map00500	Starch and sucrose metabolism	643
Proteobacteria	map00910	Nitrogen metabolism	4			Firmicutes	map00511	Other glycan degradation	45
Proteobacteria	map00920	Sulfur metabolism	7			Firmicutes	map00520	Amino sugar and nucleotide sugar metabolism	424
Proteobacteria	map01100	Metabolic pathways	46			Firmicutes	map00521	Streptomycin biosynthesis	106
Proteobacteria	map01110	Biosynthesis of secondary metabolites	13			Firmicutes	map00523	Polyketide sugar unit biosynthesis	11
Proteobacteria	map01120	Microbial metabolism in diverse environments	40			Firmicutes	map00524	Neomycin, kanamycin and gentamicin biosynthesis	1
Proteobacteria	map01130		19			Firmicutes	map00531	Glycosaminoglycan degradation	2
Proteobacteria	map01200	Carbon metabolism	23			Firmicutes	map00550	Peptidoglycan biosynthesis	8
Proteobacteria	map01212	Fatty acid metabolism	4			Firmicutes	map00561	Glycerolipid metabolism	43
Proteobacteria	map01230	Biosynthesis of amino acids	7			Firmicutes	map00562	Inositol phosphate metabolism	438
Proteobacteria	map02010	ABC transporters	2			Firmicutes	map00564	Glycerophospholipid metabolism	8
Proteobacteria	map02020	Two-component system	19			Firmicutes	map00600	Sphingolipid metabolism	30
Proteobacteria	map02024	Quorum sensing	5			Firmicutes	map00603	Glycosphingolipid biosynthesis - globo and isoglobo series	6
Proteobacteria	map02040	Flagellar assembly	15			Firmicutes	map00620	Pyruvate metabolism	1706
Proteobacteria	map03010	Ribosome	6			Firmicutes	map00623	Toluene degradation	1
Proteobacteria	map03018	RNA degradation	6			Firmicutes	map00625	Chloroalkane and chloroalkene degradation	23
Proteobacteria	map04066	HIF-1 signaling pathway	4			Firmicutes	map00626	Naphthalene degradation	23
Proteobacteria	map04212	Longevity regulating pathway - worm	5			Firmicutes	map00630	Glyoxylate and dicarboxylate metabolism	181
Proteobacteria	map04217	Necroptosis	2			Firmicutes	map00633	Nitrotoluene degradation	42
Proteobacteria	map04621	NOD-like receptor signaling pathway	15			Firmicutes	map00640	Propanoate metabolism	469
Proteobacteria	map04626	Plant-pathogen interaction	15			Firmicutes	map00643	Styrene degradation	73
Proteobacteria	map04940	Type I diabetes mellitus	5			Firmicutes	map00650	Butanoate metabolism	1024
Proteobacteria	map04964	Proximal tubule bicarbonate reclamation	2			Firmicutes	map00660	C5-Branched dibasic acid metabolism	7
Proteobacteria	map05010	Alzheimer disease	3			Firmicutes	map00670	One carbon pool by folate	51
Proteobacteria	map05132	Salmonella infection	15			Firmicutes	map00680	Methane metabolism	462
Proteobacteria	map05134	Legionellosis	20			Firmicutes	map00710	Carbon fixation in photosynthetic organisms	1525
Proteobacteria	map05152	Tuberculosis	5			Firmicutes	map00720	Carbon fixation pathways in prokaryotes	1092
Spirochaetes	map00010	Glycolysis / Gluconeogenesis	1			Firmicutes	map00730	Thiamine metabolism	24
Spirochaetes	map00310	Lysine degradation	1			Firmicutes	map00750	Vitamin B6 metabolism	28
Spirochaetes	map00561	Glycerolipid metabolism	1			Firmicutes	map00760	Nicotinate and nicotinamide metabolism	13
Spirochaetes	map00640	Propanoate metabolism	1			Firmicutes	map00770	Pantothenate and CoA biosynthesis	94
Spirochaetes	map00680	Methane metabolism	1			Firmicutes	map00780	Biotin metabolism	11
Spirochaetes	map00720	Carbon fixation pathways in prokaryotes	2			Firmicutes	map00790	Folate biosynthesis	27
Spirochaetes	map01100	Metabolic pathways	1			Firmicutes	map00791	Atrazine degradation	4
Spirochaetes	map01110	Biosynthesis of secondary metabolites	1			Firmicutes	map00900	Terpenoid backbone biosynthesis	271
Spirochaetes	map01120	Microbial metabolism in diverse environments	3			Firmicutes	map00910	Nitrogen metabolism	199
Spirochaetes	map01130		1			Firmicutes	map00920	Sulfur metabolism	13
Spirochaetes	map01200	Carbon metabolism	3			Firmicutes	map00940	Phenylpropanoid biosynthesis	26
Spirochaetes	map01230	Biosynthesis of amino acids	1			Firmicutes	map00970	Aminoacyl-tRNA biosynthesis	31
Spirochaetes	map02010	ABC transporters	5			Firmicutes	map00983	Drug metabolism - other enzymes	7
Spirochaetes	map03018	RNA degradation	1			Firmicutes	map01040	Biosynthesis of unsaturated fatty acids	6
Spirochaetes	map04066	HIF-1 signaling pathway	1			Firmicutes	map01051	Biosynthesis of ansamycins	31
Tenericutes	map00010	Glycolysis / Gluconeogenesis	1			Firmicutes	map01100	Metabolic pathways	5066
Tenericutes	map00710	Carbon fixation in photosynthetic organisms	1			Firmicutes	map01110	Biosynthesis of secondary metabolites	2785
Tenericutes	map01100	Metabolic pathways	1			Firmicutes	map01120	Microbial metabolism in diverse environments	3570
Tenericutes	map01110	Biosynthesis of secondary metabolites	1			Firmicutes	map01130		2581
Tenericutes	map01120	Microbial metabolism in diverse environments	1			Firmicutes	map01200	Carbon metabolism	2893
Tenericutes	map01130		1			Firmicutes	map01210	2-Oxocarboxylic acid metabolism	173
Tenericutes	map01200	Carbon metabolism	1			Firmicutes	map01212	Fatty acid metabolism	298
Tenericutes	map01230	Biosynthesis of amino acids	1			Firmicutes	map01220	Degradation of aromatic compounds	82
Tenericutes	map04066	HIF-1 signaling pathway	1			Firmicutes	map01230	Biosynthesis of amino acids	1204
Tenericutes	map05010	Alzheimer disease	1			Firmicutes	map01501	beta-Lactam resistance	93
Verrucomicrobia	map00010	Glycolysis / Gluconeogenesis	1			Firmicutes	map01502	Vancomycin resistance	8
Verrucomicrobia	map00680	Methane metabolism	1			Firmicutes	map01523	Antifolate resistance	17
Verrucomicrobia	map01100	Metabolic pathways	1			Firmicutes	map02010	ABC transporters	753
Verrucomicrobia	map01110	Biosynthesis of secondary metabolites	1			Firmicutes	map02020	Two-component system	867
Verrucomicrobia	map01120	Microbial metabolism in diverse environments	1			Firmicutes	map02024	Quorum sensing	236
Verrucomicrobia	map01130		1			Firmicutes	map02026	Biofilm formation - Escherichia coli	356
Verrucomicrobia	map01200	Carbon metabolism	1			Firmicutes	map02030	Bacterial chemotaxis	351
Verrucomicrobia	map01230	Biosynthesis of amino acids	1			Firmicutes	map02040	Flagellar assembly	563
Verrucomicrobia	map03018	RNA degradation	1			Firmicutes	map02060	Phosphotransferase system (PTS)	41
Verrucomicrobia	map04066	HIF-1 signaling pathway	1			Firmicutes	map03010	Ribosome	1639
						Firmicutes	map03018	RNA degradation	573
						Firmicutes	map03020	RNA polymerase	87
						Firmicutes	map03030	DNA replication	44
						Firmicutes	map03060	Protein export	2
						Firmicutes	map03070	Bacterial secretion system	2
						Firmicutes	map03320	PPAR signaling pathway	58
						Firmicutes	map03430	Mismatch repair	44
						Firmicutes	map03440	Homologous recombination	44
						Firmicutes	map04066	HIF-1 signaling pathway	273
						Firmicutes	map04068	FoxO signaling pathway	34
						Firmicutes	map04112	Cell cycle - Caulobacter	2
						Firmicutes	map04141	Protein processing in endoplasmic reticulum	68
						Firmicutes	map04142	Lysosome	8
						Firmicutes	map04146	Peroxisome	43
						Firmicutes	map04151	PI3K-Akt signaling pathway	99
						Firmicutes	map04152	AMPK signaling pathway	45
						Firmicutes	map04212	Longevity regulating pathway - worm	472
						Firmicutes	map04216	Ferroptosis	6
						Firmicutes	map04217	Necroptosis	339
						Firmicutes	map04612	Antigen processing and presentation	65
						Firmicutes	map04621	NOD-like receptor signaling pathway	573
						Firmicutes	map04626	Plant-pathogen interaction	591
						Firmicutes	map04657	IL-17 signaling pathway	65
						Firmicutes	map04659	Th17 cell differentiation	65
						Firmicutes	map04714	Thermogenesis	6
						Firmicutes	map04724	Glutamatergic synapse	16
						Firmicutes	map04727	GABAergic synapse	16
						Firmicutes	map04910	Insulin signaling pathway	151
						Firmicutes	map04914	Progesterone-mediated oocyte maturation	65
						Firmicutes	map04915	Estrogen signaling pathway	65
						Firmicutes	map04917	Prolactin signaling pathway	4
						Firmicutes	map04920	Adipocytokine signaling pathway	40
						Firmicutes	map04922	Glucagon signaling pathway	217
						Firmicutes	map04930	Type II diabetes mellitus	42
						Firmicutes	map04931	Insulin resistance	151
						Firmicutes	map04940	Type I diabetes mellitus	322
						Firmicutes	map04964	Proximal tubule bicarbonate reclamation	175
						Firmicutes	map05010	Alzheimer disease	188
						Firmicutes	map05100	Bacterial invasion of epithelial cells	8
						Firmicutes	map05120	Epithelial cell signaling in Helicobacter pylori infection	4
						Firmicutes	map05132	Salmonella infection	508
						Firmicutes	map05134	Legionellosis	836
						Firmicutes	map05152	Tuberculosis	470
						Firmicutes	map05165	Human papillomavirus infection	42
						Firmicutes	map05200	Pathways in cancer	65
						Firmicutes	map05203	Viral carcinogenesis	42
						Firmicutes	map05215	Prostate cancer	65
						Firmicutes	map05230	Central carbon metabolism in cancer	59
						Firmicutes	map05418	Fluid shear stress and atherosclerosis	65
						Fusobacteria	map00010	Glycolysis / Gluconeogenesis	1
						Fusobacteria	map00020	Citrate cycle (TCA cycle)	1
						Fusobacteria	map00071	Fatty acid degradation	1
						Fusobacteria	map00072		1
						Fusobacteria	map00280	Valine, leucine and isoleucine degradation	1
						Fusobacteria	map00310	Lysine degradation	1
						Fusobacteria	map00350	Tyrosine metabolism	1
						Fusobacteria	map00362	Benzoate degradation	1
						Fusobacteria	map00380	Tryptophan metabolism	1
						Fusobacteria	map00500	Starch and sucrose metabolism	2
						Fusobacteria	map00620	Pyruvate metabolism	2
						Fusobacteria	map00630	Glyoxylate and dicarboxylate metabolism	1
						Fusobacteria	map00640	Propanoate metabolism	1
						Fusobacteria	map00650	Butanoate metabolism	1
						Fusobacteria	map00710	Carbon fixation in photosynthetic organisms	1
						Fusobacteria	map00720	Carbon fixation pathways in prokaryotes	1
						Fusobacteria	map00900	Terpenoid backbone biosynthesis	1
						Fusobacteria	map01100	Metabolic pathways	4
						Fusobacteria	map01110	Biosynthesis of secondary metabolites	4
						Fusobacteria	map01120	Microbial metabolism in diverse environments	2
						Fusobacteria	map01130		2
						Fusobacteria	map01200	Carbon metabolism	2
						Fusobacteria	map01212	Fatty acid metabolism	1
						Fusobacteria	map02020	Two-component system	1
						Fusobacteria	map02026	Biofilm formation - Escherichia coli	2
						Fusobacteria	map03010	Ribosome	1
						Fusobacteria	map04217	Necroptosis	2
						Fusobacteria	map04910	Insulin signaling pathway	2
						Fusobacteria	map04922	Glucagon signaling pathway	2
						Fusobacteria	map04931	Insulin resistance	2
						Mollusca	map00010	Glycolysis / Gluconeogenesis	1
						Mollusca	map00020	Citrate cycle (TCA cycle)	1
						Mollusca	map00620	Pyruvate metabolism	1
						Mollusca	map01100	Metabolic pathways	1
						Mollusca	map01110	Biosynthesis of secondary metabolites	1
						Mollusca	map01120	Microbial metabolism in diverse environments	1
						Mollusca	map01130		1
						Mollusca	map03320	PPAR signaling pathway	1
						Mollusca	map04068	FoxO signaling pathway	1
						Mollusca	map04151	PI3K-Akt signaling pathway	1
						Mollusca	map04152	AMPK signaling pathway	1
						Mollusca	map04910	Insulin signaling pathway	1
						Mollusca	map04920	Adipocytokine signaling pathway	1
						Mollusca	map04922	Glucagon signaling pathway	1
						Mollusca	map04931	Insulin resistance	1
						Mollusca	map04964	Proximal tubule bicarbonate reclamation	1
						Nematoda	map00010	Glycolysis / Gluconeogenesis	1
						Nematoda	map00020	Citrate cycle (TCA cycle)	1
						Nematoda	map00620	Pyruvate metabolism	1
						Nematoda	map00710	Carbon fixation in photosynthetic organisms	1
						Nematoda	map01100	Metabolic pathways	1
						Nematoda	map01110	Biosynthesis of secondary metabolites	1
						Nematoda	map01120	Microbial metabolism in diverse environments	1
						Nematoda	map01130		1
						Nematoda	map01200	Carbon metabolism	1
						Nematoda	map02010	ABC transporters	1
						Nitrospirae	map00670	One carbon pool by folate	2
						Nitrospirae	map00720	Carbon fixation pathways in prokaryotes	2
						Nitrospirae	map01100	Metabolic pathways	2
						Nitrospirae	map01120	Microbial metabolism in diverse environments	2
						Nitrospirae	map01200	Carbon metabolism	2
						Perkinsozoa	map00010	Glycolysis / Gluconeogenesis	1
						Perkinsozoa	map00020	Citrate cycle (TCA cycle)	1
						Perkinsozoa	map00620	Pyruvate metabolism	1
						Perkinsozoa	map00650	Butanoate metabolism	1
						Perkinsozoa	map00720	Carbon fixation pathways in prokaryotes	1
						Perkinsozoa	map01100	Metabolic pathways	1
						Perkinsozoa	map01120	Microbial metabolism in diverse environments	1
						Perkinsozoa	map01130		1
						Perkinsozoa	map01200	Carbon metabolism	1
						Planctomycetes	map02010	ABC transporters	1
						Planctomycetes	map02030	Bacterial chemotaxis	1
						Platyhelminthes	map00230	Purine metabolism	1
						Platyhelminthes	map00240	Pyrimidine metabolism	1
						Platyhelminthes	map00511	Other glycan degradation	1
						Platyhelminthes	map00550	Peptidoglycan biosynthesis	1
						Platyhelminthes	map00730	Thiamine metabolism	1
						Platyhelminthes	map00760	Nicotinate and nicotinamide metabolism	1
						Platyhelminthes	map00790	Folate biosynthesis	1
						Platyhelminthes	map01100	Metabolic pathways	2
						Platyhelminthes	map01110	Biosynthesis of secondary metabolites	1
						Platyhelminthes	map01501	beta-Lactam resistance	1
						Platyhelminthes	map01502	Vancomycin resistance	1
						Platyhelminthes	map02010	ABC transporters	1
						Platyhelminthes	map02020	Two-component system	2
						Platyhelminthes	map02024	Quorum sensing	1
						Platyhelminthes	map05100	Bacterial invasion of epithelial cells	1
						Porifera	map02020	Two-component system	3
						Porifera	map02040	Flagellar assembly	3
						Porifera	map04621	NOD-like receptor signaling pathway	3
						Porifera	map04626	Plant-pathogen interaction	3
						Porifera	map05132	Salmonella infection	3
						Porifera	map05134	Legionellosis	3
						Proteobacteria	map00010	Glycolysis / Gluconeogenesis	18
						Proteobacteria	map00020	Citrate cycle (TCA cycle)	6
						Proteobacteria	map00030	Pentose phosphate pathway	6
						Proteobacteria	map00040	Pentose and glucuronate interconversions	3
						Proteobacteria	map00051	Fructose and mannose metabolism	7
						Proteobacteria	map00052	Galactose metabolism	7
						Proteobacteria	map00071	Fatty acid degradation	8
						Proteobacteria	map00072		5
						Proteobacteria	map00190	Oxidative phosphorylation	5
						Proteobacteria	map00195	Photosynthesis	5
						Proteobacteria	map00220	Arginine biosynthesis	9
						Proteobacteria	map00230	Purine metabolism	9
						Proteobacteria	map00240	Pyrimidine metabolism	1
						Proteobacteria	map00250	Alanine, aspartate and glutamate metabolism	10
						Proteobacteria	map00261	Monobactam biosynthesis	7
						Proteobacteria	map00270	Cysteine and methionine metabolism	1
						Proteobacteria	map00280	Valine, leucine and isoleucine degradation	6
						Proteobacteria	map00310	Lysine degradation	5
						Proteobacteria	map00330	Arginine and proline metabolism	1
						Proteobacteria	map00350	Tyrosine metabolism	4
						Proteobacteria	map00360	Phenylalanine metabolism	1
						Proteobacteria	map00362	Benzoate degradation	5
						Proteobacteria	map00380	Tryptophan metabolism	5
						Proteobacteria	map00400	Phenylalanine, tyrosine and tryptophan biosynthesis	1
						Proteobacteria	map00401	Novobiocin biosynthesis	1
						Proteobacteria	map00430	Taurine and hypotaurine metabolism	4
						Proteobacteria	map00450	Selenocompound metabolism	7
						Proteobacteria	map00460	Cyanoamino acid metabolism	1
						Proteobacteria	map00471		4
						Proteobacteria	map00500	Starch and sucrose metabolism	7
						Proteobacteria	map00511	Other glycan degradation	2
						Proteobacteria	map00520	Amino sugar and nucleotide sugar metabolism	6
						Proteobacteria	map00562	Inositol phosphate metabolism	2
						Proteobacteria	map00564	Glycerophospholipid metabolism	1
						Proteobacteria	map00600	Sphingolipid metabolism	2
						Proteobacteria	map00620	Pyruvate metabolism	27
						Proteobacteria	map00623	Toluene degradation	1
						Proteobacteria	map00625	Chloroalkane and chloroalkene degradation	3
						Proteobacteria	map00626	Naphthalene degradation	3
						Proteobacteria	map00630	Glyoxylate and dicarboxylate metabolism	7
						Proteobacteria	map00633	Nitrotoluene degradation	3
						Proteobacteria	map00640	Propanoate metabolism	15
						Proteobacteria	map00650	Butanoate metabolism	22
						Proteobacteria	map00670	One carbon pool by folate	1
						Proteobacteria	map00680	Methane metabolism	10
						Proteobacteria	map00710	Carbon fixation in photosynthetic organisms	8
						Proteobacteria	map00720	Carbon fixation pathways in prokaryotes	22
						Proteobacteria	map00760	Nicotinate and nicotinamide metabolism	5
						Proteobacteria	map00900	Terpenoid backbone biosynthesis	5
						Proteobacteria	map00910	Nitrogen metabolism	8
						Proteobacteria	map00920	Sulfur metabolism	11
						Proteobacteria	map00940	Phenylpropanoid biosynthesis	1
						Proteobacteria	map00950	Isoquinoline alkaloid biosynthesis	1
						Proteobacteria	map00960	Tropane, piperidine and pyridine alkaloid biosynthesis	1
						Proteobacteria	map01100	Metabolic pathways	84
						Proteobacteria	map01110	Biosynthesis of secondary metabolites	22
						Proteobacteria	map01120	Microbial metabolism in diverse environments	59
						Proteobacteria	map01130		35
						Proteobacteria	map01200	Carbon metabolism	37
						Proteobacteria	map01210	2-Oxocarboxylic acid metabolism	1
						Proteobacteria	map01212	Fatty acid metabolism	5
						Proteobacteria	map01220	Degradation of aromatic compounds	4
						Proteobacteria	map01230	Biosynthesis of amino acids	9
						Proteobacteria	map02010	ABC transporters	1
						Proteobacteria	map02020	Two-component system	25
						Proteobacteria	map02024	Quorum sensing	7
						Proteobacteria	map02026	Biofilm formation - Escherichia coli	1
						Proteobacteria	map02030	Bacterial chemotaxis	2
						Proteobacteria	map02040	Flagellar assembly	19
						Proteobacteria	map03010	Ribosome	22
						Proteobacteria	map03018	RNA degradation	17
						Proteobacteria	map04066	HIF-1 signaling pathway	2
						Proteobacteria	map04122	Sulfur relay system	2
						Proteobacteria	map04212	Longevity regulating pathway - worm	17
						Proteobacteria	map04217	Necroptosis	5
						Proteobacteria	map04621	NOD-like receptor signaling pathway	17
						Proteobacteria	map04626	Plant-pathogen interaction	17
						Proteobacteria	map04910	Insulin signaling pathway	1
						Proteobacteria	map04922	Glucagon signaling pathway	2
						Proteobacteria	map04930	Type II diabetes mellitus	1
						Proteobacteria	map04931	Insulin resistance	1
						Proteobacteria	map04940	Type I diabetes mellitus	12
						Proteobacteria	map04964	Proximal tubule bicarbonate reclamation	4
						Proteobacteria	map05010	Alzheimer disease	2
						Proteobacteria	map05132	Salmonella infection	17
						Proteobacteria	map05134	Legionellosis	29
						Proteobacteria	map05152	Tuberculosis	17
						Proteobacteria	map05165	Human papillomavirus infection	1
						Proteobacteria	map05203	Viral carcinogenesis	1
						Proteobacteria	map05230	Central carbon metabolism in cancer	1
						Spirochaetes	map00010	Glycolysis / Gluconeogenesis	2
						Spirochaetes	map00020	Citrate cycle (TCA cycle)	1
						Spirochaetes	map00561	Glycerolipid metabolism	1
						Spirochaetes	map00620	Pyruvate metabolism	1
						Spirochaetes	map00640	Propanoate metabolism	1
						Spirochaetes	map00650	Butanoate metabolism	1
						Spirochaetes	map00680	Methane metabolism	1
						Spirochaetes	map00720	Carbon fixation pathways in prokaryotes	1
						Spirochaetes	map01100	Metabolic pathways	2
						Spirochaetes	map01110	Biosynthesis of secondary metabolites	1
						Spirochaetes	map01120	Microbial metabolism in diverse environments	2
						Spirochaetes	map01130		2
						Spirochaetes	map01200	Carbon metabolism	2
						Spirochaetes	map01230	Biosynthesis of amino acids	1
						Spirochaetes	map01501	beta-Lactam resistance	1
						Spirochaetes	map02010	ABC transporters	5
						Spirochaetes	map02024	Quorum sensing	3
						Spirochaetes	map03018	RNA degradation	1
						Spirochaetes	map04066	HIF-1 signaling pathway	1
						Streptophyta	map00010	Glycolysis / Gluconeogenesis	1
						Streptophyta	map00270	Cysteine and methionine metabolism	1
						Streptophyta	map00620	Pyruvate metabolism	1
						Streptophyta	map00640	Propanoate metabolism	1
						Streptophyta	map01100	Metabolic pathways	1
						Streptophyta	map01110	Biosynthesis of secondary metabolites	1
						Streptophyta	map01120	Microbial metabolism in diverse environments	1
						Streptophyta	map01130		1
						Streptophyta	map03018	RNA degradation	1
						Streptophyta	map04212	Longevity regulating pathway - worm	1
						Streptophyta	map04922	Glucagon signaling pathway	1
						Streptophyta	map04940	Type I diabetes mellitus	1
						Streptophyta	map05134	Legionellosis	1
						Streptophyta	map05152	Tuberculosis	1
						Tenericutes	map00010	Glycolysis / Gluconeogenesis	1
						Tenericutes	map00710	Carbon fixation in photosynthetic organisms	1
						Tenericutes	map01100	Metabolic pathways	1
						Tenericutes	map01110	Biosynthesis of secondary metabolites	1
						Tenericutes	map01120	Microbial metabolism in diverse environments	1
						Tenericutes	map01130		1
						Tenericutes	map01200	Carbon metabolism	1
						Tenericutes	map01230	Biosynthesis of amino acids	1
						Tenericutes	map02020	Two-component system	1
						Tenericutes	map02040	Flagellar assembly	1
						Tenericutes	map04066	HIF-1 signaling pathway	1
						Tenericutes	map04621	NOD-like receptor signaling pathway	1
						Tenericutes	map04626	Plant-pathogen interaction	1
						Tenericutes	map05010	Alzheimer disease	1
						Tenericutes	map05132	Salmonella infection	1
						Tenericutes	map05134	Legionellosis	1
						Thaumarchaeota	map02020	Two-component system	1
						Thaumarchaeota	map02040	Flagellar assembly	1
						Thaumarchaeota	map04621	NOD-like receptor signaling pathway	1
						Thaumarchaeota	map04626	Plant-pathogen interaction	1
						Thaumarchaeota	map05132	Salmonella infection	1
						Thaumarchaeota	map05134	Legionellosis	1
						Uroviricota	map00920	Sulfur metabolism	2
						Uroviricota	map01120	Microbial metabolism in diverse environments	2
						Verrucomicrobia	map00010	Glycolysis / Gluconeogenesis	3
						Verrucomicrobia	map00680	Methane metabolism	3
						Verrucomicrobia	map01100	Metabolic pathways	3
						Verrucomicrobia	map01110	Biosynthesis of secondary metabolites	3
						Verrucomicrobia	map01120	Microbial metabolism in diverse environments	3
						Verrucomicrobia	map01130		3
						Verrucomicrobia	map01200	Carbon metabolism	3
						Verrucomicrobia	map01230	Biosynthesis of amino acids	3
						Verrucomicrobia	map02020	Two-component system	1
						Verrucomicrobia	map02040	Flagellar assembly	1
						Verrucomicrobia	map03018	RNA degradation	3
						Verrucomicrobia	map04066	HIF-1 signaling pathway	3
						Verrucomicrobia	map04621	NOD-like receptor signaling pathway	1
						Verrucomicrobia	map04626	Plant-pathogen interaction	1
						Verrucomicrobia	map05132	Salmonella infection	1
						Verrucomicrobia	map05134	Legionellosis	1

## Sheet: Class
DDA-PASEF						DIA-PASEF
Class	KEGG_Pathway	Pathway name	Total peptide count			Class	KEGG_Pathway	Pathway name	Total peptide count
Actinobacteria	map02010	ABC transporters	1			Acidimicrobiia	map02020	Two-component system	1
Agaricomycetes	map00010	Glycolysis / Gluconeogenesis	1			Acidimicrobiia	map02040	Flagellar assembly	1
Agaricomycetes	map00020	Citrate cycle (TCA cycle)	1			Acidimicrobiia	map04621	NOD-like receptor signaling pathway	1
Agaricomycetes	map00620	Pyruvate metabolism	1			Acidimicrobiia	map04626	Plant-pathogen interaction	1
Agaricomycetes	map00650	Butanoate metabolism	1			Acidimicrobiia	map05132	Salmonella infection	1
Agaricomycetes	map00720	Carbon fixation pathways in prokaryotes	1			Acidimicrobiia	map05134	Legionellosis	1
Agaricomycetes	map01100	Metabolic pathways	1			Actinobacteria	map00010	Glycolysis / Gluconeogenesis	3
Agaricomycetes	map01120	Microbial metabolism in diverse environments	1			Actinobacteria	map00020	Citrate cycle (TCA cycle)	1
Agaricomycetes	map01130		1			Actinobacteria	map00030	Pentose phosphate pathway	2
Agaricomycetes	map01200	Carbon metabolism	1			Actinobacteria	map00500	Starch and sucrose metabolism	1
Agaricomycetes	map02020	Two-component system	2			Actinobacteria	map00511	Other glycan degradation	1
Agaricomycetes	map02040	Flagellar assembly	2			Actinobacteria	map00520	Amino sugar and nucleotide sugar metabolism	1
Agaricomycetes	map04621	NOD-like receptor signaling pathway	2			Actinobacteria	map00600	Sphingolipid metabolism	1
Agaricomycetes	map04626	Plant-pathogen interaction	2			Actinobacteria	map00620	Pyruvate metabolism	1
Agaricomycetes	map05132	Salmonella infection	2			Actinobacteria	map00650	Butanoate metabolism	1
Agaricomycetes	map05134	Legionellosis	2			Actinobacteria	map00680	Methane metabolism	1
Alphaproteobacteria	map00010	Glycolysis / Gluconeogenesis	1			Actinobacteria	map00710	Carbon fixation in photosynthetic organisms	1
Alphaproteobacteria	map00030	Pentose phosphate pathway	2			Actinobacteria	map00720	Carbon fixation pathways in prokaryotes	1
Alphaproteobacteria	map00052	Galactose metabolism	1			Actinobacteria	map01051	Biosynthesis of ansamycins	1
Alphaproteobacteria	map00220	Arginine biosynthesis	2			Actinobacteria	map01100	Metabolic pathways	4
Alphaproteobacteria	map00230	Purine metabolism	1			Actinobacteria	map01110	Biosynthesis of secondary metabolites	3
Alphaproteobacteria	map00250	Alanine, aspartate and glutamate metabolism	2			Actinobacteria	map01120	Microbial metabolism in diverse environments	4
Alphaproteobacteria	map00471		2			Actinobacteria	map01130		4
Alphaproteobacteria	map00500	Starch and sucrose metabolism	1			Actinobacteria	map01200	Carbon metabolism	4
Alphaproteobacteria	map00520	Amino sugar and nucleotide sugar metabolism	1			Actinobacteria	map01230	Biosynthesis of amino acids	2
Alphaproteobacteria	map00521	Streptomycin biosynthesis	1			Actinobacteria	map01501	beta-Lactam resistance	5
Alphaproteobacteria	map00630	Glyoxylate and dicarboxylate metabolism	1			Actinobacteria	map02010	ABC transporters	7
Alphaproteobacteria	map00910	Nitrogen metabolism	2			Actinobacteria	map02020	Two-component system	3
Alphaproteobacteria	map01100	Metabolic pathways	4			Actinobacteria	map02024	Quorum sensing	7
Alphaproteobacteria	map01110	Biosynthesis of secondary metabolites	1			Actinobacteria	map02040	Flagellar assembly	3
Alphaproteobacteria	map01120	Microbial metabolism in diverse environments	2			Actinobacteria	map03018	RNA degradation	1
Alphaproteobacteria	map01130		1			Actinobacteria	map04066	HIF-1 signaling pathway	1
Alphaproteobacteria	map01200	Carbon metabolism	3			Actinobacteria	map04142	Lysosome	1
Alphaproteobacteria	map02020	Two-component system	5			Actinobacteria	map04621	NOD-like receptor signaling pathway	3
Alphaproteobacteria	map02024	Quorum sensing	3			Actinobacteria	map04626	Plant-pathogen interaction	3
Alphaproteobacteria	map02040	Flagellar assembly	5			Actinobacteria	map05132	Salmonella infection	3
Alphaproteobacteria	map04217	Necroptosis	2			Actinobacteria	map05134	Legionellosis	3
Alphaproteobacteria	map04621	NOD-like receptor signaling pathway	5			Actinopteri	map02010	ABC transporters	1
Alphaproteobacteria	map04626	Plant-pathogen interaction	5			Agaricomycetes	map00010	Glycolysis / Gluconeogenesis	1
Alphaproteobacteria	map04964	Proximal tubule bicarbonate reclamation	2			Agaricomycetes	map00020	Citrate cycle (TCA cycle)	1
Alphaproteobacteria	map05132	Salmonella infection	5			Agaricomycetes	map00620	Pyruvate metabolism	1
Alphaproteobacteria	map05134	Legionellosis	5			Agaricomycetes	map00650	Butanoate metabolism	1
Bacilli	map00010	Glycolysis / Gluconeogenesis	67			Agaricomycetes	map00720	Carbon fixation pathways in prokaryotes	1
Bacilli	map00020	Citrate cycle (TCA cycle)	2			Agaricomycetes	map01100	Metabolic pathways	1
Bacilli	map00030	Pentose phosphate pathway	7			Agaricomycetes	map01120	Microbial metabolism in diverse environments	1
Bacilli	map00051	Fructose and mannose metabolism	7			Agaricomycetes	map01130		1
Bacilli	map00071	Fatty acid degradation	2			Agaricomycetes	map01200	Carbon metabolism	1
Bacilli	map00072		2			Agaricomycetes	map02020	Two-component system	2
Bacilli	map00220	Arginine biosynthesis	1			Agaricomycetes	map02040	Flagellar assembly	2
Bacilli	map00230	Purine metabolism	19			Agaricomycetes	map04621	NOD-like receptor signaling pathway	2
Bacilli	map00250	Alanine, aspartate and glutamate metabolism	1			Agaricomycetes	map04626	Plant-pathogen interaction	2
Bacilli	map00260	Glycine, serine and threonine metabolism	2			Agaricomycetes	map05132	Salmonella infection	2
Bacilli	map00270	Cysteine and methionine metabolism	7			Agaricomycetes	map05134	Legionellosis	2
Bacilli	map00280	Valine, leucine and isoleucine degradation	2			Alphaproteobacteria	map00010	Glycolysis / Gluconeogenesis	1
Bacilli	map00290	Valine, leucine and isoleucine biosynthesis	1			Alphaproteobacteria	map00030	Pentose phosphate pathway	1
Bacilli	map00310	Lysine degradation	2			Alphaproteobacteria	map00052	Galactose metabolism	1
Bacilli	map00350	Tyrosine metabolism	1			Alphaproteobacteria	map00071	Fatty acid degradation	1
Bacilli	map00362	Benzoate degradation	2			Alphaproteobacteria	map00072		1
Bacilli	map00380	Tryptophan metabolism	2			Alphaproteobacteria	map00190	Oxidative phosphorylation	1
Bacilli	map00430	Taurine and hypotaurine metabolism	6			Alphaproteobacteria	map00195	Photosynthesis	1
Bacilli	map00471		1			Alphaproteobacteria	map00220	Arginine biosynthesis	2
Bacilli	map00480	Glutathione metabolism	1			Alphaproteobacteria	map00230	Purine metabolism	1
Bacilli	map00562	Inositol phosphate metabolism	9			Alphaproteobacteria	map00250	Alanine, aspartate and glutamate metabolism	2
Bacilli	map00620	Pyruvate metabolism	38			Alphaproteobacteria	map00280	Valine, leucine and isoleucine degradation	2
Bacilli	map00630	Glyoxylate and dicarboxylate metabolism	3			Alphaproteobacteria	map00310	Lysine degradation	1
Bacilli	map00640	Propanoate metabolism	16			Alphaproteobacteria	map00362	Benzoate degradation	1
Bacilli	map00650	Butanoate metabolism	6			Alphaproteobacteria	map00380	Tryptophan metabolism	1
Bacilli	map00660	C5-Branched dibasic acid metabolism	1			Alphaproteobacteria	map00460	Cyanoamino acid metabolism	1
Bacilli	map00670	One carbon pool by folate	1			Alphaproteobacteria	map00471		2
Bacilli	map00680	Methane metabolism	24			Alphaproteobacteria	map00500	Starch and sucrose metabolism	1
Bacilli	map00710	Carbon fixation in photosynthetic organisms	26			Alphaproteobacteria	map00520	Amino sugar and nucleotide sugar metabolism	1
Bacilli	map00720	Carbon fixation pathways in prokaryotes	9			Alphaproteobacteria	map00564	Glycerophospholipid metabolism	1
Bacilli	map00770	Pantothenate and CoA biosynthesis	1			Alphaproteobacteria	map00620	Pyruvate metabolism	2
Bacilli	map00900	Terpenoid backbone biosynthesis	2			Alphaproteobacteria	map00630	Glyoxylate and dicarboxylate metabolism	3
Bacilli	map00910	Nitrogen metabolism	1			Alphaproteobacteria	map00640	Propanoate metabolism	2
Bacilli	map01100	Metabolic pathways	83			Alphaproteobacteria	map00650	Butanoate metabolism	1
Bacilli	map01110	Biosynthesis of secondary metabolites	70			Alphaproteobacteria	map00720	Carbon fixation pathways in prokaryotes	1
Bacilli	map01120	Microbial metabolism in diverse environments	84			Alphaproteobacteria	map00900	Terpenoid backbone biosynthesis	1
Bacilli	map01130		71			Alphaproteobacteria	map00910	Nitrogen metabolism	2
Bacilli	map01200	Carbon metabolism	70			Alphaproteobacteria	map00940	Phenylpropanoid biosynthesis	1
Bacilli	map01210	2-Oxocarboxylic acid metabolism	1			Alphaproteobacteria	map01100	Metabolic pathways	10
Bacilli	map01212	Fatty acid metabolism	2			Alphaproteobacteria	map01110	Biosynthesis of secondary metabolites	4
Bacilli	map01230	Biosynthesis of amino acids	59			Alphaproteobacteria	map01120	Microbial metabolism in diverse environments	4
Bacilli	map02010	ABC transporters	22			Alphaproteobacteria	map01130		3
Bacilli	map02020	Two-component system	7			Alphaproteobacteria	map01200	Carbon metabolism	6
Bacilli	map02040	Flagellar assembly	5			Alphaproteobacteria	map01212	Fatty acid metabolism	1
Bacilli	map03010	Ribosome	23			Alphaproteobacteria	map01230	Biosynthesis of amino acids	1
Bacilli	map03018	RNA degradation	19			Alphaproteobacteria	map02020	Two-component system	2
Bacilli	map04066	HIF-1 signaling pathway	30			Alphaproteobacteria	map02024	Quorum sensing	5
Bacilli	map04212	Longevity regulating pathway - worm	5			Alphaproteobacteria	map02040	Flagellar assembly	2
Bacilli	map04217	Necroptosis	1			Alphaproteobacteria	map03010	Ribosome	5
Bacilli	map04621	NOD-like receptor signaling pathway	5			Alphaproteobacteria	map03018	RNA degradation	2
Bacilli	map04626	Plant-pathogen interaction	5			Alphaproteobacteria	map04212	Longevity regulating pathway - worm	2
Bacilli	map04922	Glucagon signaling pathway	28			Alphaproteobacteria	map04217	Necroptosis	2
Bacilli	map04930	Type II diabetes mellitus	19			Alphaproteobacteria	map04621	NOD-like receptor signaling pathway	1
Bacilli	map04940	Type I diabetes mellitus	5			Alphaproteobacteria	map04626	Plant-pathogen interaction	1
Bacilli	map04964	Proximal tubule bicarbonate reclamation	1			Alphaproteobacteria	map04922	Glucagon signaling pathway	1
Bacilli	map05010	Alzheimer disease	16			Alphaproteobacteria	map04930	Type II diabetes mellitus	1
Bacilli	map05132	Salmonella infection	5			Alphaproteobacteria	map04940	Type I diabetes mellitus	2
Bacilli	map05134	Legionellosis	10			Alphaproteobacteria	map04964	Proximal tubule bicarbonate reclamation	2
Bacilli	map05152	Tuberculosis	5			Alphaproteobacteria	map05132	Salmonella infection	1
Bacilli	map05165	Human papillomavirus infection	19			Alphaproteobacteria	map05134	Legionellosis	3
Bacilli	map05203	Viral carcinogenesis	19			Alphaproteobacteria	map05152	Tuberculosis	2
Bacilli	map05230	Central carbon metabolism in cancer	21			Alphaproteobacteria	map05165	Human papillomavirus infection	1
Bacteroidia	map00010	Glycolysis / Gluconeogenesis	113			Alphaproteobacteria	map05203	Viral carcinogenesis	1
Bacteroidia	map00020	Citrate cycle (TCA cycle)	69			Alphaproteobacteria	map05230	Central carbon metabolism in cancer	1
Bacteroidia	map00030	Pentose phosphate pathway	5			Anaerolineae	map00270	Cysteine and methionine metabolism	3
Bacteroidia	map00040	Pentose and glucuronate interconversions	18			Anaerolineae	map00280	Valine, leucine and isoleucine degradation	3
Bacteroidia	map00051	Fructose and mannose metabolism	26			Anaerolineae	map00290	Valine, leucine and isoleucine biosynthesis	3
Bacteroidia	map00052	Galactose metabolism	1			Anaerolineae	map00770	Pantothenate and CoA biosynthesis	3
Bacteroidia	map00190	Oxidative phosphorylation	27			Anaerolineae	map00790	Folate biosynthesis	3
Bacteroidia	map00220	Arginine biosynthesis	27			Anaerolineae	map01100	Metabolic pathways	3
Bacteroidia	map00230	Purine metabolism	3			Anaerolineae	map01110	Biosynthesis of secondary metabolites	3
Bacteroidia	map00240	Pyrimidine metabolism	2			Anaerolineae	map01130		3
Bacteroidia	map00250	Alanine, aspartate and glutamate metabolism	27			Anaerolineae	map01210	2-Oxocarboxylic acid metabolism	3
Bacteroidia	map00260	Glycine, serine and threonine metabolism	14			Anaerolineae	map01230	Biosynthesis of amino acids	3
Bacteroidia	map00270	Cysteine and methionine metabolism	4			Arachnida	map00010	Glycolysis / Gluconeogenesis	1
Bacteroidia	map00290	Valine, leucine and isoleucine biosynthesis	1			Arachnida	map00710	Carbon fixation in photosynthetic organisms	1
Bacteroidia	map00430	Taurine and hypotaurine metabolism	1			Arachnida	map01100	Metabolic pathways	1
Bacteroidia	map00480	Glutathione metabolism	1			Arachnida	map01110	Biosynthesis of secondary metabolites	1
Bacteroidia	map00500	Starch and sucrose metabolism	8			Arachnida	map01120	Microbial metabolism in diverse environments	1
Bacteroidia	map00520	Amino sugar and nucleotide sugar metabolism	1			Arachnida	map01130		1
Bacteroidia	map00521	Streptomycin biosynthesis	3			Arachnida	map01200	Carbon metabolism	1
Bacteroidia	map00562	Inositol phosphate metabolism	11			Arachnida	map01230	Biosynthesis of amino acids	1
Bacteroidia	map00620	Pyruvate metabolism	82			Arachnida	map04066	HIF-1 signaling pathway	1
Bacteroidia	map00623	Toluene degradation	6			Arachnida	map05010	Alzheimer disease	1
Bacteroidia	map00627	Aminobenzoate degradation	1			Bacilli	map00010	Glycolysis / Gluconeogenesis	98
Bacteroidia	map00630	Glyoxylate and dicarboxylate metabolism	4			Bacilli	map00020	Citrate cycle (TCA cycle)	5
Bacteroidia	map00640	Propanoate metabolism	1			Bacilli	map00030	Pentose phosphate pathway	31
Bacteroidia	map00650	Butanoate metabolism	49			Bacilli	map00040	Pentose and glucuronate interconversions	1
Bacteroidia	map00660	C5-Branched dibasic acid metabolism	1			Bacilli	map00051	Fructose and mannose metabolism	20
Bacteroidia	map00680	Methane metabolism	46			Bacilli	map00052	Galactose metabolism	3
Bacteroidia	map00710	Carbon fixation in photosynthetic organisms	100			Bacilli	map00071	Fatty acid degradation	3
Bacteroidia	map00720	Carbon fixation pathways in prokaryotes	91			Bacilli	map00072		3
Bacteroidia	map00750	Vitamin B6 metabolism	6			Bacilli	map00190	Oxidative phosphorylation	2
Bacteroidia	map00770	Pantothenate and CoA biosynthesis	1			Bacilli	map00195	Photosynthesis	2
Bacteroidia	map00910	Nitrogen metabolism	29			Bacilli	map00220	Arginine biosynthesis	12
Bacteroidia	map01051	Biosynthesis of ansamycins	3			Bacilli	map00230	Purine metabolism	35
Bacteroidia	map01100	Metabolic pathways	254			Bacilli	map00250	Alanine, aspartate and glutamate metabolism	2
Bacteroidia	map01110	Biosynthesis of secondary metabolites	131			Bacilli	map00260	Glycine, serine and threonine metabolism	2
Bacteroidia	map01120	Microbial metabolism in diverse environments	203			Bacilli	map00270	Cysteine and methionine metabolism	12
Bacteroidia	map01130		155			Bacilli	map00280	Valine, leucine and isoleucine degradation	3
Bacteroidia	map01200	Carbon metabolism	190			Bacilli	map00290	Valine, leucine and isoleucine biosynthesis	6
Bacteroidia	map01210	2-Oxocarboxylic acid metabolism	1			Bacilli	map00310	Lysine degradation	3
Bacteroidia	map01220	Degradation of aromatic compounds	6			Bacilli	map00350	Tyrosine metabolism	4
Bacteroidia	map01230	Biosynthesis of amino acids	83			Bacilli	map00362	Benzoate degradation	3
Bacteroidia	map02024	Quorum sensing	1			Bacilli	map00380	Tryptophan metabolism	3
Bacteroidia	map02026	Biofilm formation - Escherichia coli	6			Bacilli	map00430	Taurine and hypotaurine metabolism	1
Bacteroidia	map03010	Ribosome	249			Bacilli	map00471		2
Bacteroidia	map03018	RNA degradation	41			Bacilli	map00480	Glutathione metabolism	9
Bacteroidia	map03020	RNA polymerase	2			Bacilli	map00500	Starch and sucrose metabolism	1
Bacteroidia	map03060	Protein export	1			Bacilli	map00511	Other glycan degradation	2
Bacteroidia	map03070	Bacterial secretion system	1			Bacilli	map00520	Amino sugar and nucleotide sugar metabolism	9
Bacteroidia	map04013	MAPK signaling pathway - fly	1			Bacilli	map00531	Glycosaminoglycan degradation	1
Bacteroidia	map04066	HIF-1 signaling pathway	60			Bacilli	map00550	Peptidoglycan biosynthesis	1
Bacteroidia	map04068	FoxO signaling pathway	1			Bacilli	map00562	Inositol phosphate metabolism	9
Bacteroidia	map04146	Peroxisome	1			Bacilli	map00620	Pyruvate metabolism	68
Bacteroidia	map04211	Longevity regulating pathway	1			Bacilli	map00630	Glyoxylate and dicarboxylate metabolism	9
Bacteroidia	map04212	Longevity regulating pathway - worm	7			Bacilli	map00633	Nitrotoluene degradation	4
Bacteroidia	map04213	Longevity regulating pathway - multiple species	4			Bacilli	map00640	Propanoate metabolism	25
Bacteroidia	map04217	Necroptosis	6			Bacilli	map00650	Butanoate metabolism	21
Bacteroidia	map04910	Insulin signaling pathway	6			Bacilli	map00660	C5-Branched dibasic acid metabolism	6
Bacteroidia	map04922	Glucagon signaling pathway	6			Bacilli	map00680	Methane metabolism	31
Bacteroidia	map04931	Insulin resistance	6			Bacilli	map00710	Carbon fixation in photosynthetic organisms	44
Bacteroidia	map04940	Type I diabetes mellitus	6			Bacilli	map00720	Carbon fixation pathways in prokaryotes	10
Bacteroidia	map05010	Alzheimer disease	25			Bacilli	map00770	Pantothenate and CoA biosynthesis	6
Bacteroidia	map05016	Huntington disease	1			Bacilli	map00791	Atrazine degradation	4
Bacteroidia	map05134	Legionellosis	14			Bacilli	map00900	Terpenoid backbone biosynthesis	3
Bacteroidia	map05152	Tuberculosis	6			Bacilli	map00910	Nitrogen metabolism	2
Betaproteobacteria	map02020	Two-component system	1			Bacilli	map01051	Biosynthesis of ansamycins	3
Betaproteobacteria	map02040	Flagellar assembly	1			Bacilli	map01100	Metabolic pathways	167
Betaproteobacteria	map04621	NOD-like receptor signaling pathway	1			Bacilli	map01110	Biosynthesis of secondary metabolites	123
Betaproteobacteria	map04626	Plant-pathogen interaction	1			Bacilli	map01120	Microbial metabolism in diverse environments	151
Betaproteobacteria	map05132	Salmonella infection	1			Bacilli	map01130		125
Betaproteobacteria	map05134	Legionellosis	1			Bacilli	map01200	Carbon metabolism	108
Blastocatellia	map03018	RNA degradation	1			Bacilli	map01210	2-Oxocarboxylic acid metabolism	6
Blastocatellia	map04212	Longevity regulating pathway - worm	1			Bacilli	map01212	Fatty acid metabolism	3
Blastocatellia	map05152	Tuberculosis	1			Bacilli	map01230	Biosynthesis of amino acids	93
Branchiopoda	map03010	Ribosome	3			Bacilli	map01501	beta-Lactam resistance	10
Chitinispirillia	map00010	Glycolysis / Gluconeogenesis	1			Bacilli	map01502	Vancomycin resistance	1
Chitinispirillia	map00710	Carbon fixation in photosynthetic organisms	1			Bacilli	map02010	ABC transporters	41
Chitinispirillia	map01100	Metabolic pathways	1			Bacilli	map02020	Two-component system	15
Chitinispirillia	map01110	Biosynthesis of secondary metabolites	1			Bacilli	map02024	Quorum sensing	10
Chitinispirillia	map01120	Microbial metabolism in diverse environments	1			Bacilli	map02030	Bacterial chemotaxis	1
Chitinispirillia	map01130		1			Bacilli	map02040	Flagellar assembly	10
Chitinispirillia	map01200	Carbon metabolism	1			Bacilli	map02060	Phosphotransferase system (PTS)	8
Chitinispirillia	map01230	Biosynthesis of amino acids	1			Bacilli	map03010	Ribosome	107
Chitinispirillia	map04066	HIF-1 signaling pathway	1			Bacilli	map03018	RNA degradation	36
Chitinispirillia	map05010	Alzheimer disease	1			Bacilli	map04066	HIF-1 signaling pathway	33
Clostridia	map00010	Glycolysis / Gluconeogenesis	1546			Bacilli	map04152	AMPK signaling pathway	3
Clostridia	map00020	Citrate cycle (TCA cycle)	854			Bacilli	map04212	Longevity regulating pathway - worm	16
Clostridia	map00030	Pentose phosphate pathway	322			Bacilli	map04217	Necroptosis	2
Clostridia	map00040	Pentose and glucuronate interconversions	98			Bacilli	map04621	NOD-like receptor signaling pathway	10
Clostridia	map00051	Fructose and mannose metabolism	482			Bacilli	map04626	Plant-pathogen interaction	10
Clostridia	map00052	Galactose metabolism	189			Bacilli	map04922	Glucagon signaling pathway	45
Clostridia	map00053	Ascorbate and aldarate metabolism	17			Bacilli	map04930	Type II diabetes mellitus	31
Clostridia	map00061	Fatty acid biosynthesis	7			Bacilli	map04940	Type I diabetes mellitus	16
Clostridia	map00071	Fatty acid degradation	217			Bacilli	map04964	Proximal tubule bicarbonate reclamation	2
Clostridia	map00072		100			Bacilli	map05010	Alzheimer disease	16
Clostridia	map00190	Oxidative phosphorylation	137			Bacilli	map05100	Bacterial invasion of epithelial cells	1
Clostridia	map00195	Photosynthesis	32			Bacilli	map05120	Epithelial cell signaling in Helicobacter pylori infection	4
Clostridia	map00220	Arginine biosynthesis	56			Bacilli	map05132	Salmonella infection	10
Clostridia	map00230	Purine metabolism	107			Bacilli	map05134	Legionellosis	26
Clostridia	map00240	Pyrimidine metabolism	57			Bacilli	map05152	Tuberculosis	16
Clostridia	map00250	Alanine, aspartate and glutamate metabolism	100			Bacilli	map05165	Human papillomavirus infection	31
Clostridia	map00260	Glycine, serine and threonine metabolism	44			Bacilli	map05203	Viral carcinogenesis	31
Clostridia	map00261	Monobactam biosynthesis	8			Bacilli	map05230	Central carbon metabolism in cancer	40
Clostridia	map00270	Cysteine and methionine metabolism	18			Bacteroidia	map00010	Glycolysis / Gluconeogenesis	108
Clostridia	map00280	Valine, leucine and isoleucine degradation	206			Bacteroidia	map00020	Citrate cycle (TCA cycle)	63
Clostridia	map00290	Valine, leucine and isoleucine biosynthesis	81			Bacteroidia	map00030	Pentose phosphate pathway	14
Clostridia	map00300	Lysine biosynthesis	10			Bacteroidia	map00040	Pentose and glucuronate interconversions	23
Clostridia	map00310	Lysine degradation	107			Bacteroidia	map00051	Fructose and mannose metabolism	37
Clostridia	map00330	Arginine and proline metabolism	10			Bacteroidia	map00052	Galactose metabolism	4
Clostridia	map00340	Histidine metabolism	2			Bacteroidia	map00061	Fatty acid biosynthesis	3
Clostridia	map00350	Tyrosine metabolism	14			Bacteroidia	map00120	Primary bile acid biosynthesis	1
Clostridia	map00360	Phenylalanine metabolism	49			Bacteroidia	map00121	Secondary bile acid biosynthesis	1
Clostridia	map00362	Benzoate degradation	171			Bacteroidia	map00190	Oxidative phosphorylation	20
Clostridia	map00380	Tryptophan metabolism	101			Bacteroidia	map00220	Arginine biosynthesis	29
Clostridia	map00400	Phenylalanine, tyrosine and tryptophan biosynthesis	2			Bacteroidia	map00230	Purine metabolism	28
Clostridia	map00430	Taurine and hypotaurine metabolism	47			Bacteroidia	map00240	Pyrimidine metabolism	28
Clostridia	map00450	Selenocompound metabolism	4			Bacteroidia	map00250	Alanine, aspartate and glutamate metabolism	32
Clostridia	map00460	Cyanoamino acid metabolism	16			Bacteroidia	map00260	Glycine, serine and threonine metabolism	22
Clostridia	map00471		50			Bacteroidia	map00270	Cysteine and methionine metabolism	8
Clostridia	map00480	Glutathione metabolism	32			Bacteroidia	map00290	Valine, leucine and isoleucine biosynthesis	4
Clostridia	map00500	Starch and sucrose metabolism	308			Bacteroidia	map00330	Arginine and proline metabolism	1
Clostridia	map00511	Other glycan degradation	17			Bacteroidia	map00333	Prodigiosin biosynthesis	2
Clostridia	map00520	Amino sugar and nucleotide sugar metabolism	225			Bacteroidia	map00350	Tyrosine metabolism	1
Clostridia	map00521	Streptomycin biosynthesis	37			Bacteroidia	map00360	Phenylalanine metabolism	1
Clostridia	map00523	Polyketide sugar unit biosynthesis	6			Bacteroidia	map00400	Phenylalanine, tyrosine and tryptophan biosynthesis	1
Clostridia	map00524	Neomycin, kanamycin and gentamicin biosynthesis	1			Bacteroidia	map00401	Novobiocin biosynthesis	1
Clostridia	map00561	Glycerolipid metabolism	23			Bacteroidia	map00410	beta-Alanine metabolism	3
Clostridia	map00562	Inositol phosphate metabolism	243			Bacteroidia	map00430	Taurine and hypotaurine metabolism	6
Clostridia	map00564	Glycerophospholipid metabolism	6			Bacteroidia	map00460	Cyanoamino acid metabolism	6
Clostridia	map00600	Sphingolipid metabolism	12			Bacteroidia	map00480	Glutathione metabolism	1
Clostridia	map00603	Glycosphingolipid biosynthesis - globo and isoglobo series	1			Bacteroidia	map00500	Starch and sucrose metabolism	21
Clostridia	map00620	Pyruvate metabolism	1628			Bacteroidia	map00520	Amino sugar and nucleotide sugar metabolism	4
Clostridia	map00625	Chloroalkane and chloroalkene degradation	13			Bacteroidia	map00521	Streptomycin biosynthesis	10
Clostridia	map00626	Naphthalene degradation	13			Bacteroidia	map00524	Neomycin, kanamycin and gentamicin biosynthesis	1
Clostridia	map00630	Glyoxylate and dicarboxylate metabolism	156			Bacteroidia	map00562	Inositol phosphate metabolism	20
Clostridia	map00633	Nitrotoluene degradation	6			Bacteroidia	map00600	Sphingolipid metabolism	3
Clostridia	map00640	Propanoate metabolism	578			Bacteroidia	map00620	Pyruvate metabolism	90
Clostridia	map00643	Styrene degradation	41			Bacteroidia	map00623	Toluene degradation	1
Clostridia	map00650	Butanoate metabolism	997			Bacteroidia	map00627	Aminobenzoate degradation	4
Clostridia	map00670	One carbon pool by folate	13			Bacteroidia	map00630	Glyoxylate and dicarboxylate metabolism	10
Clostridia	map00680	Methane metabolism	251			Bacteroidia	map00640	Propanoate metabolism	3
Clostridia	map00710	Carbon fixation in photosynthetic organisms	1305			Bacteroidia	map00650	Butanoate metabolism	60
Clostridia	map00720	Carbon fixation pathways in prokaryotes	558			Bacteroidia	map00660	C5-Branched dibasic acid metabolism	4
Clostridia	map00730	Thiamine metabolism	16			Bacteroidia	map00670	One carbon pool by folate	3
Clostridia	map00750	Vitamin B6 metabolism	2			Bacteroidia	map00680	Methane metabolism	63
Clostridia	map00760	Nicotinate and nicotinamide metabolism	6			Bacteroidia	map00710	Carbon fixation in photosynthetic organisms	92
Clostridia	map00770	Pantothenate and CoA biosynthesis	81			Bacteroidia	map00720	Carbon fixation pathways in prokaryotes	104
Clostridia	map00780	Biotin metabolism	3			Bacteroidia	map00750	Vitamin B6 metabolism	15
Clostridia	map00790	Folate biosynthesis	5			Bacteroidia	map00760	Nicotinate and nicotinamide metabolism	1
Clostridia	map00900	Terpenoid backbone biosynthesis	163			Bacteroidia	map00770	Pantothenate and CoA biosynthesis	4
Clostridia	map00910	Nitrogen metabolism	99			Bacteroidia	map00780	Biotin metabolism	3
Clostridia	map00920	Sulfur metabolism	13			Bacteroidia	map00790	Folate biosynthesis	1
Clostridia	map00940	Phenylpropanoid biosynthesis	7			Bacteroidia	map00910	Nitrogen metabolism	30
Clostridia	map00970	Aminoacyl-tRNA biosynthesis	6			Bacteroidia	map00940	Phenylpropanoid biosynthesis	4
Clostridia	map00983	Drug metabolism - other enzymes	1			Bacteroidia	map00950	Isoquinoline alkaloid biosynthesis	1
Clostridia	map01051	Biosynthesis of ansamycins	28			Bacteroidia	map00960	Tropane, piperidine and pyridine alkaloid biosynthesis	1
Clostridia	map01100	Metabolic pathways	3561			Bacteroidia	map00970	Aminoacyl-tRNA biosynthesis	3
Clostridia	map01110	Biosynthesis of secondary metabolites	2093			Bacteroidia	map01040	Biosynthesis of unsaturated fatty acids	2
Clostridia	map01120	Microbial metabolism in diverse environments	2725			Bacteroidia	map01051	Biosynthesis of ansamycins	4
Clostridia	map01130		1962			Bacteroidia	map01100	Metabolic pathways	317
Clostridia	map01200	Carbon metabolism	2054			Bacteroidia	map01110	Biosynthesis of secondary metabolites	135
Clostridia	map01210	2-Oxocarboxylic acid metabolism	121			Bacteroidia	map01120	Microbial metabolism in diverse environments	218
Clostridia	map01212	Fatty acid metabolism	207			Bacteroidia	map01130		173
Clostridia	map01220	Degradation of aromatic compounds	35			Bacteroidia	map01200	Carbon metabolism	201
Clostridia	map01230	Biosynthesis of amino acids	733			Bacteroidia	map01210	2-Oxocarboxylic acid metabolism	5
Clostridia	map01501	beta-Lactam resistance	34			Bacteroidia	map01212	Fatty acid metabolism	3
Clostridia	map01523	Antifolate resistance	3			Bacteroidia	map01220	Degradation of aromatic compounds	1
Clostridia	map02010	ABC transporters	508			Bacteroidia	map01230	Biosynthesis of amino acids	90
Clostridia	map02020	Two-component system	673			Bacteroidia	map01501	beta-Lactam resistance	1
Clostridia	map02024	Quorum sensing	100			Bacteroidia	map01503	Cationic antimicrobial peptide (CAMP) resistance	1
Clostridia	map02026	Biofilm formation - Escherichia coli	193			Bacteroidia	map01523	Antifolate resistance	3
Clostridia	map02030	Bacterial chemotaxis	220			Bacteroidia	map02010	ABC transporters	1
Clostridia	map02040	Flagellar assembly	482			Bacteroidia	map02020	Two-component system	1
Clostridia	map02060	Phosphotransferase system (PTS)	13			Bacteroidia	map02024	Quorum sensing	6
Clostridia	map03010	Ribosome	853			Bacteroidia	map02026	Biofilm formation - Escherichia coli	12
Clostridia	map03018	RNA degradation	189			Bacteroidia	map02030	Bacterial chemotaxis	1
Clostridia	map03020	RNA polymerase	46			Bacteroidia	map02040	Flagellar assembly	1
Clostridia	map03030	DNA replication	19			Bacteroidia	map03010	Ribosome	303
Clostridia	map03060	Protein export	1			Bacteroidia	map03018	RNA degradation	53
Clostridia	map03070	Bacterial secretion system	1			Bacteroidia	map03020	RNA polymerase	18
Clostridia	map03320	PPAR signaling pathway	31			Bacteroidia	map03030	DNA replication	1
Clostridia	map03430	Mismatch repair	19			Bacteroidia	map03060	Protein export	3
Clostridia	map03440	Homologous recombination	19			Bacteroidia	map03070	Bacterial secretion system	4
Clostridia	map04066	HIF-1 signaling pathway	228			Bacteroidia	map03430	Mismatch repair	1
Clostridia	map04068	FoxO signaling pathway	15			Bacteroidia	map03440	Homologous recombination	1
Clostridia	map04112	Cell cycle - Caulobacter	6			Bacteroidia	map04013	MAPK signaling pathway - fly	1
Clostridia	map04141	Protein processing in endoplasmic reticulum	10			Bacteroidia	map04066	HIF-1 signaling pathway	40
Clostridia	map04142	Lysosome	6			Bacteroidia	map04068	FoxO signaling pathway	1
Clostridia	map04146	Peroxisome	29			Bacteroidia	map04071	Sphingolipid signaling pathway	3
Clostridia	map04151	PI3K-Akt signaling pathway	25			Bacteroidia	map04146	Peroxisome	1
Clostridia	map04152	AMPK signaling pathway	20			Bacteroidia	map04211	Longevity regulating pathway	1
Clostridia	map04212	Longevity regulating pathway - worm	174			Bacteroidia	map04212	Longevity regulating pathway - worm	14
Clostridia	map04216	Ferroptosis	4			Bacteroidia	map04213	Longevity regulating pathway - multiple species	2
Clostridia	map04217	Necroptosis	114			Bacteroidia	map04217	Necroptosis	12
Clostridia	map04612	Antigen processing and presentation	10			Bacteroidia	map04626	Plant-pathogen interaction	1
Clostridia	map04621	NOD-like receptor signaling pathway	475			Bacteroidia	map04727	GABAergic synapse	3
Clostridia	map04626	Plant-pathogen interaction	487			Bacteroidia	map04910	Insulin signaling pathway	12
Clostridia	map04657	IL-17 signaling pathway	10			Bacteroidia	map04922	Glucagon signaling pathway	12
Clostridia	map04659	Th17 cell differentiation	10			Bacteroidia	map04931	Insulin resistance	12
Clostridia	map04714	Thermogenesis	4			Bacteroidia	map04940	Type I diabetes mellitus	14
Clostridia	map04910	Insulin signaling pathway	69			Bacteroidia	map05010	Alzheimer disease	8
Clostridia	map04914	Progesterone-mediated oocyte maturation	10			Bacteroidia	map05016	Huntington disease	1
Clostridia	map04915	Estrogen signaling pathway	10			Bacteroidia	map05133	Pertussis	1
Clostridia	map04917	Prolactin signaling pathway	1			Bacteroidia	map05134	Legionellosis	24
Clostridia	map04920	Adipocytokine signaling pathway	19			Bacteroidia	map05152	Tuberculosis	13
Clostridia	map04922	Glucagon signaling pathway	72			Betaproteobacteria	map00220	Arginine biosynthesis	1
Clostridia	map04931	Insulin resistance	69			Betaproteobacteria	map00250	Alanine, aspartate and glutamate metabolism	1
Clostridia	map04940	Type I diabetes mellitus	138			Betaproteobacteria	map00471		1
Clostridia	map04964	Proximal tubule bicarbonate reclamation	65			Betaproteobacteria	map00520	Amino sugar and nucleotide sugar metabolism	2
Clostridia	map05010	Alzheimer disease	214			Betaproteobacteria	map00620	Pyruvate metabolism	1
Clostridia	map05132	Salmonella infection	465			Betaproteobacteria	map00623	Toluene degradation	1
Clostridia	map05134	Legionellosis	605			Betaproteobacteria	map00640	Propanoate metabolism	1
Clostridia	map05152	Tuberculosis	168			Betaproteobacteria	map00650	Butanoate metabolism	1
Clostridia	map05200	Pathways in cancer	10			Betaproteobacteria	map00670	One carbon pool by folate	1
Clostridia	map05215	Prostate cancer	10			Betaproteobacteria	map00720	Carbon fixation pathways in prokaryotes	2
Clostridia	map05230	Central carbon metabolism in cancer	5			Betaproteobacteria	map00910	Nitrogen metabolism	1
Clostridia	map05418	Fluid shear stress and atherosclerosis	10			Betaproteobacteria	map01100	Metabolic pathways	4
Coriobacteriia	map00260	Glycine, serine and threonine metabolism	2			Betaproteobacteria	map01120	Microbial metabolism in diverse environments	4
Coriobacteriia	map00330	Arginine and proline metabolism	2			Betaproteobacteria	map01200	Carbon metabolism	3
Coriobacteriia	map01100	Metabolic pathways	2			Betaproteobacteria	map01220	Degradation of aromatic compounds	1
Cytophagia	map00260	Glycine, serine and threonine metabolism	1			Betaproteobacteria	map02020	Two-component system	6
Cytophagia	map00460	Cyanoamino acid metabolism	1			Betaproteobacteria	map02030	Bacterial chemotaxis	1
Cytophagia	map00630	Glyoxylate and dicarboxylate metabolism	1			Betaproteobacteria	map02040	Flagellar assembly	5
Cytophagia	map00670	One carbon pool by folate	1			Betaproteobacteria	map03010	Ribosome	1
Cytophagia	map00680	Methane metabolism	1			Betaproteobacteria	map04217	Necroptosis	1
Cytophagia	map01100	Metabolic pathways	1			Betaproteobacteria	map04621	NOD-like receptor signaling pathway	5
Cytophagia	map01110	Biosynthesis of secondary metabolites	1			Betaproteobacteria	map04626	Plant-pathogen interaction	5
Cytophagia	map01120	Microbial metabolism in diverse environments	1			Betaproteobacteria	map04964	Proximal tubule bicarbonate reclamation	1
Cytophagia	map01130		1			Betaproteobacteria	map05132	Salmonella infection	5
Cytophagia	map01200	Carbon metabolism	1			Betaproteobacteria	map05134	Legionellosis	5
Cytophagia	map01230	Biosynthesis of amino acids	1			Blastocatellia	map03018	RNA degradation	1
Cytophagia	map01523	Antifolate resistance	1			Blastocatellia	map04212	Longevity regulating pathway - worm	1
Cytophagia	map02010	ABC transporters	1			Blastocatellia	map05152	Tuberculosis	1
Cytophagia	map02020	Two-component system	1			Branchiopoda	map03010	Ribosome	3
Cytophagia	map02040	Flagellar assembly	1			Caudoviricetes	map00920	Sulfur metabolism	2
Cytophagia	map04621	NOD-like receptor signaling pathway	1			Caudoviricetes	map01120	Microbial metabolism in diverse environments	2
Cytophagia	map04626	Plant-pathogen interaction	1			Chitinispirillia	map00010	Glycolysis / Gluconeogenesis	1
Cytophagia	map05132	Salmonella infection	1			Chitinispirillia	map00710	Carbon fixation in photosynthetic organisms	1
Cytophagia	map05134	Legionellosis	1			Chitinispirillia	map01100	Metabolic pathways	1
Deferribacteres	map00010	Glycolysis / Gluconeogenesis	7			Chitinispirillia	map01110	Biosynthesis of secondary metabolites	1
Deferribacteres	map00020	Citrate cycle (TCA cycle)	6			Chitinispirillia	map01120	Microbial metabolism in diverse environments	1
Deferribacteres	map00051	Fructose and mannose metabolism	1			Chitinispirillia	map01130		1
Deferribacteres	map00190	Oxidative phosphorylation	3			Chitinispirillia	map01200	Carbon metabolism	1
Deferribacteres	map00195	Photosynthesis	1			Chitinispirillia	map01230	Biosynthesis of amino acids	1
Deferribacteres	map00270	Cysteine and methionine metabolism	2			Chitinispirillia	map04066	HIF-1 signaling pathway	1
Deferribacteres	map00280	Valine, leucine and isoleucine degradation	4			Chitinispirillia	map05010	Alzheimer disease	1
Deferribacteres	map00380	Tryptophan metabolism	2			Chlamydiia	map00010	Glycolysis / Gluconeogenesis	1
Deferribacteres	map00562	Inositol phosphate metabolism	1			Chlamydiia	map00260	Glycine, serine and threonine metabolism	1
Deferribacteres	map00620	Pyruvate metabolism	4			Chlamydiia	map00480	Glutathione metabolism	1
Deferribacteres	map00630	Glyoxylate and dicarboxylate metabolism	20			Chlamydiia	map00680	Methane metabolism	1
Deferribacteres	map00640	Propanoate metabolism	4			Chlamydiia	map01100	Metabolic pathways	2
Deferribacteres	map00650	Butanoate metabolism	2			Chlamydiia	map01110	Biosynthesis of secondary metabolites	1
Deferribacteres	map00680	Methane metabolism	14			Chlamydiia	map01120	Microbial metabolism in diverse environments	1
Deferribacteres	map00710	Carbon fixation in photosynthetic organisms	9			Chlamydiia	map01130		1
Deferribacteres	map00720	Carbon fixation pathways in prokaryotes	6			Chlamydiia	map01200	Carbon metabolism	1
Deferribacteres	map01100	Metabolic pathways	28			Chlamydiia	map01230	Biosynthesis of amino acids	1
Deferribacteres	map01110	Biosynthesis of secondary metabolites	13			Chlorophyceae	map02020	Two-component system	2
Deferribacteres	map01120	Microbial metabolism in diverse environments	27			Chlorophyceae	map02040	Flagellar assembly	2
Deferribacteres	map01130		15			Chlorophyceae	map04621	NOD-like receptor signaling pathway	2
Deferribacteres	map01200	Carbon metabolism	29			Chlorophyceae	map04626	Plant-pathogen interaction	2
Deferribacteres	map01230	Biosynthesis of amino acids	5			Chlorophyceae	map05132	Salmonella infection	2
Deferribacteres	map02010	ABC transporters	1			Chlorophyceae	map05134	Legionellosis	2
Deferribacteres	map02020	Two-component system	10			Chromadorea	map00010	Glycolysis / Gluconeogenesis	1
Deferribacteres	map02040	Flagellar assembly	10			Chromadorea	map00020	Citrate cycle (TCA cycle)	1
Deferribacteres	map03010	Ribosome	2			Chromadorea	map00620	Pyruvate metabolism	1
Deferribacteres	map03018	RNA degradation	1			Chromadorea	map00710	Carbon fixation in photosynthetic organisms	1
Deferribacteres	map04011	MAPK signaling pathway - yeast	2			Chromadorea	map01100	Metabolic pathways	1
Deferribacteres	map04016	MAPK signaling pathway - plant	2			Chromadorea	map01110	Biosynthesis of secondary metabolites	1
Deferribacteres	map04066	HIF-1 signaling pathway	4			Chromadorea	map01120	Microbial metabolism in diverse environments	1
Deferribacteres	map04068	FoxO signaling pathway	2			Chromadorea	map01130		1
Deferribacteres	map04146	Peroxisome	2			Chromadorea	map01200	Carbon metabolism	1
Deferribacteres	map04211	Longevity regulating pathway	2			Clostridia	map00010	Glycolysis / Gluconeogenesis	1219
Deferribacteres	map04212	Longevity regulating pathway - worm	3			Clostridia	map00020	Citrate cycle (TCA cycle)	633
Deferribacteres	map04213	Longevity regulating pathway - multiple species	2			Clostridia	map00030	Pentose phosphate pathway	311
Deferribacteres	map04621	NOD-like receptor signaling pathway	10			Clostridia	map00040	Pentose and glucuronate interconversions	106
Deferribacteres	map04626	Plant-pathogen interaction	10			Clostridia	map00051	Fructose and mannose metabolism	462
Deferribacteres	map04940	Type I diabetes mellitus	1			Clostridia	map00052	Galactose metabolism	213
Deferribacteres	map05010	Alzheimer disease	4			Clostridia	map00053	Ascorbate and aldarate metabolism	18
Deferribacteres	map05014	Amyotrophic lateral sclerosis	2			Clostridia	map00061	Fatty acid biosynthesis	19
Deferribacteres	map05132	Salmonella infection	10			Clostridia	map00071	Fatty acid degradation	163
Deferribacteres	map05134	Legionellosis	13			Clostridia	map00072		55
Deferribacteres	map05152	Tuberculosis	1			Clostridia	map00121	Secondary bile acid biosynthesis	3
Deltaproteobacteria	map00010	Glycolysis / Gluconeogenesis	8			Clostridia	map00190	Oxidative phosphorylation	114
Deltaproteobacteria	map00020	Citrate cycle (TCA cycle)	2			Clostridia	map00195	Photosynthesis	36
Deltaproteobacteria	map00030	Pentose phosphate pathway	3			Clostridia	map00220	Arginine biosynthesis	73
Deltaproteobacteria	map00040	Pentose and glucuronate interconversions	1			Clostridia	map00230	Purine metabolism	189
Deltaproteobacteria	map00051	Fructose and mannose metabolism	3			Clostridia	map00240	Pyrimidine metabolism	88
Deltaproteobacteria	map00052	Galactose metabolism	1			Clostridia	map00250	Alanine, aspartate and glutamate metabolism	101
Deltaproteobacteria	map00230	Purine metabolism	4			Clostridia	map00260	Glycine, serine and threonine metabolism	64
Deltaproteobacteria	map00261	Monobactam biosynthesis	4			Clostridia	map00261	Monobactam biosynthesis	21
Deltaproteobacteria	map00430	Taurine and hypotaurine metabolism	6			Clostridia	map00270	Cysteine and methionine metabolism	38
Deltaproteobacteria	map00450	Selenocompound metabolism	4			Clostridia	map00280	Valine, leucine and isoleucine degradation	151
Deltaproteobacteria	map00500	Starch and sucrose metabolism	1			Clostridia	map00290	Valine, leucine and isoleucine biosynthesis	39
Deltaproteobacteria	map00520	Amino sugar and nucleotide sugar metabolism	1			Clostridia	map00300	Lysine biosynthesis	29
Deltaproteobacteria	map00620	Pyruvate metabolism	8			Clostridia	map00310	Lysine degradation	63
Deltaproteobacteria	map00633	Nitrotoluene degradation	1			Clostridia	map00330	Arginine and proline metabolism	29
Deltaproteobacteria	map00640	Propanoate metabolism	5			Clostridia	map00333	Prodigiosin biosynthesis	8
Deltaproteobacteria	map00650	Butanoate metabolism	7			Clostridia	map00340	Histidine metabolism	3
Deltaproteobacteria	map00680	Methane metabolism	5			Clostridia	map00350	Tyrosine metabolism	19
Deltaproteobacteria	map00710	Carbon fixation in photosynthetic organisms	5			Clostridia	map00360	Phenylalanine metabolism	61
Deltaproteobacteria	map00720	Carbon fixation pathways in prokaryotes	6			Clostridia	map00362	Benzoate degradation	144
Deltaproteobacteria	map00760	Nicotinate and nicotinamide metabolism	3			Clostridia	map00380	Tryptophan metabolism	57
Deltaproteobacteria	map00920	Sulfur metabolism	7			Clostridia	map00400	Phenylalanine, tyrosine and tryptophan biosynthesis	13
Deltaproteobacteria	map01100	Metabolic pathways	26			Clostridia	map00430	Taurine and hypotaurine metabolism	48
Deltaproteobacteria	map01110	Biosynthesis of secondary metabolites	6			Clostridia	map00450	Selenocompound metabolism	3
Deltaproteobacteria	map01120	Microbial metabolism in diverse environments	24			Clostridia	map00460	Cyanoamino acid metabolism	30
Deltaproteobacteria	map01130		13			Clostridia	map00471		53
Deltaproteobacteria	map01200	Carbon metabolism	12			Clostridia	map00472		5
Deltaproteobacteria	map01230	Biosynthesis of amino acids	6			Clostridia	map00473		3
Deltaproteobacteria	map02010	ABC transporters	2			Clostridia	map00480	Glutathione metabolism	39
Deltaproteobacteria	map02020	Two-component system	1			Clostridia	map00500	Starch and sucrose metabolism	492
Deltaproteobacteria	map02024	Quorum sensing	2			Clostridia	map00511	Other glycan degradation	37
Deltaproteobacteria	map02040	Flagellar assembly	1			Clostridia	map00520	Amino sugar and nucleotide sugar metabolism	318
Deltaproteobacteria	map03010	Ribosome	4			Clostridia	map00521	Streptomycin biosynthesis	74
Deltaproteobacteria	map03018	RNA degradation	5			Clostridia	map00523	Polyketide sugar unit biosynthesis	5
Deltaproteobacteria	map04066	HIF-1 signaling pathway	3			Clostridia	map00531	Glycosaminoglycan degradation	1
Deltaproteobacteria	map04212	Longevity regulating pathway - worm	4			Clostridia	map00550	Peptidoglycan biosynthesis	7
Deltaproteobacteria	map04621	NOD-like receptor signaling pathway	1			Clostridia	map00561	Glycerolipid metabolism	34
Deltaproteobacteria	map04626	Plant-pathogen interaction	1			Clostridia	map00562	Inositol phosphate metabolism	240
Deltaproteobacteria	map04940	Type I diabetes mellitus	4			Clostridia	map00564	Glycerophospholipid metabolism	7
Deltaproteobacteria	map05010	Alzheimer disease	2			Clostridia	map00600	Sphingolipid metabolism	23
Deltaproteobacteria	map05132	Salmonella infection	1			Clostridia	map00603	Glycosphingolipid biosynthesis - globo and isoglobo series	4
Deltaproteobacteria	map05134	Legionellosis	5			Clostridia	map00620	Pyruvate metabolism	1100
Deltaproteobacteria	map05152	Tuberculosis	4			Clostridia	map00625	Chloroalkane and chloroalkene degradation	19
Demospongiae	map02020	Two-component system	2			Clostridia	map00626	Naphthalene degradation	19
Demospongiae	map02040	Flagellar assembly	2			Clostridia	map00630	Glyoxylate and dicarboxylate metabolism	111
Demospongiae	map04621	NOD-like receptor signaling pathway	2			Clostridia	map00633	Nitrotoluene degradation	23
Demospongiae	map04626	Plant-pathogen interaction	2			Clostridia	map00640	Propanoate metabolism	303
Demospongiae	map05132	Salmonella infection	2			Clostridia	map00643	Styrene degradation	49
Demospongiae	map05134	Legionellosis	2			Clostridia	map00650	Butanoate metabolism	628
Erysipelotrichia	map00010	Glycolysis / Gluconeogenesis	2			Clostridia	map00670	One carbon pool by folate	24
Erysipelotrichia	map00020	Citrate cycle (TCA cycle)	1			Clostridia	map00680	Methane metabolism	269
Erysipelotrichia	map00460	Cyanoamino acid metabolism	1			Clostridia	map00710	Carbon fixation in photosynthetic organisms	939
Erysipelotrichia	map00500	Starch and sucrose metabolism	1			Clostridia	map00720	Carbon fixation pathways in prokaryotes	586
Erysipelotrichia	map00620	Pyruvate metabolism	1			Clostridia	map00730	Thiamine metabolism	10
Erysipelotrichia	map00650	Butanoate metabolism	1			Clostridia	map00750	Vitamin B6 metabolism	12
Erysipelotrichia	map00720	Carbon fixation pathways in prokaryotes	1			Clostridia	map00760	Nicotinate and nicotinamide metabolism	13
Erysipelotrichia	map00940	Phenylpropanoid biosynthesis	1			Clostridia	map00770	Pantothenate and CoA biosynthesis	39
Erysipelotrichia	map01100	Metabolic pathways	2			Clostridia	map00780	Biotin metabolism	11
Erysipelotrichia	map01110	Biosynthesis of secondary metabolites	1			Clostridia	map00790	Folate biosynthesis	13
Erysipelotrichia	map01120	Microbial metabolism in diverse environments	1			Clostridia	map00900	Terpenoid backbone biosynthesis	171
Erysipelotrichia	map01130		1			Clostridia	map00910	Nitrogen metabolism	85
Erysipelotrichia	map01200	Carbon metabolism	1			Clostridia	map00920	Sulfur metabolism	9
Euglenida	map00010	Glycolysis / Gluconeogenesis	1			Clostridia	map00940	Phenylpropanoid biosynthesis	18
Euglenida	map00710	Carbon fixation in photosynthetic organisms	1			Clostridia	map00970	Aminoacyl-tRNA biosynthesis	18
Euglenida	map01100	Metabolic pathways	1			Clostridia	map00983	Drug metabolism - other enzymes	1
Euglenida	map01110	Biosynthesis of secondary metabolites	1			Clostridia	map01040	Biosynthesis of unsaturated fatty acids	6
Euglenida	map01120	Microbial metabolism in diverse environments	1			Clostridia	map01051	Biosynthesis of ansamycins	17
Euglenida	map01130		1			Clostridia	map01100	Metabolic pathways	3184
Euglenida	map01200	Carbon metabolism	1			Clostridia	map01110	Biosynthesis of secondary metabolites	1804
Euglenida	map01230	Biosynthesis of amino acids	1			Clostridia	map01120	Microbial metabolism in diverse environments	2175
Euglenida	map04066	HIF-1 signaling pathway	1			Clostridia	map01130		1650
Euglenida	map05010	Alzheimer disease	1			Clostridia	map01200	Carbon metabolism	1683
Flavobacteriia	map00010	Glycolysis / Gluconeogenesis	4			Clostridia	map01210	2-Oxocarboxylic acid metabolism	97
Flavobacteriia	map00020	Citrate cycle (TCA cycle)	3			Clostridia	map01212	Fatty acid metabolism	157
Flavobacteriia	map00260	Glycine, serine and threonine metabolism	1			Clostridia	map01220	Degradation of aromatic compounds	47
Flavobacteriia	map00460	Cyanoamino acid metabolism	1			Clostridia	map01230	Biosynthesis of amino acids	639
Flavobacteriia	map00620	Pyruvate metabolism	3			Clostridia	map01501	beta-Lactam resistance	71
Flavobacteriia	map00630	Glyoxylate and dicarboxylate metabolism	1			Clostridia	map01502	Vancomycin resistance	7
Flavobacteriia	map00670	One carbon pool by folate	1			Clostridia	map01523	Antifolate resistance	7
Flavobacteriia	map00680	Methane metabolism	2			Clostridia	map02010	ABC transporters	574
Flavobacteriia	map00710	Carbon fixation in photosynthetic organisms	3			Clostridia	map02020	Two-component system	680
Flavobacteriia	map01100	Metabolic pathways	5			Clostridia	map02024	Quorum sensing	204
Flavobacteriia	map01110	Biosynthesis of secondary metabolites	5			Clostridia	map02026	Biofilm formation - Escherichia coli	262
Flavobacteriia	map01120	Microbial metabolism in diverse environments	5			Clostridia	map02030	Bacterial chemotaxis	295
Flavobacteriia	map01130		5			Clostridia	map02040	Flagellar assembly	439
Flavobacteriia	map01200	Carbon metabolism	5			Clostridia	map02060	Phosphotransferase system (PTS)	29
Flavobacteriia	map01230	Biosynthesis of amino acids	2			Clostridia	map03010	Ribosome	787
Flavobacteriia	map01523	Antifolate resistance	1			Clostridia	map03018	RNA degradation	264
Flavobacteriia	map03018	RNA degradation	2			Clostridia	map03020	RNA polymerase	62
Flavobacteriia	map04066	HIF-1 signaling pathway	1			Clostridia	map03030	DNA replication	18
Flavobacteriia	map04212	Longevity regulating pathway - worm	1			Clostridia	map03060	Protein export	2
Flavobacteriia	map04940	Type I diabetes mellitus	1			Clostridia	map03070	Bacterial secretion system	2
Flavobacteriia	map05134	Legionellosis	1			Clostridia	map03320	PPAR signaling pathway	41
Flavobacteriia	map05152	Tuberculosis	1			Clostridia	map03430	Mismatch repair	18
Gammaproteobacteria	map00010	Glycolysis / Gluconeogenesis	1			Clostridia	map03440	Homologous recombination	18
Gammaproteobacteria	map00051	Fructose and mannose metabolism	1			Clostridia	map04066	HIF-1 signaling pathway	121
Gammaproteobacteria	map00071	Fatty acid degradation	2			Clostridia	map04068	FoxO signaling pathway	23
Gammaproteobacteria	map00072		2			Clostridia	map04112	Cell cycle - Caulobacter	2
Gammaproteobacteria	map00190	Oxidative phosphorylation	1			Clostridia	map04141	Protein processing in endoplasmic reticulum	25
Gammaproteobacteria	map00195	Photosynthesis	1			Clostridia	map04142	Lysosome	7
Gammaproteobacteria	map00220	Arginine biosynthesis	2			Clostridia	map04146	Peroxisome	36
Gammaproteobacteria	map00230	Purine metabolism	1			Clostridia	map04151	PI3K-Akt signaling pathway	45
Gammaproteobacteria	map00240	Pyrimidine metabolism	1			Clostridia	map04152	AMPK signaling pathway	27
Gammaproteobacteria	map00250	Alanine, aspartate and glutamate metabolism	2			Clostridia	map04212	Longevity regulating pathway - worm	245
Gammaproteobacteria	map00280	Valine, leucine and isoleucine degradation	2			Clostridia	map04216	Ferroptosis	6
Gammaproteobacteria	map00310	Lysine degradation	2			Clostridia	map04217	Necroptosis	157
Gammaproteobacteria	map00362	Benzoate degradation	2			Clostridia	map04612	Antigen processing and presentation	22
Gammaproteobacteria	map00380	Tryptophan metabolism	2			Clostridia	map04621	NOD-like receptor signaling pathway	416
Gammaproteobacteria	map00620	Pyruvate metabolism	2			Clostridia	map04626	Plant-pathogen interaction	428
Gammaproteobacteria	map00630	Glyoxylate and dicarboxylate metabolism	2			Clostridia	map04657	IL-17 signaling pathway	22
Gammaproteobacteria	map00640	Propanoate metabolism	2			Clostridia	map04659	Th17 cell differentiation	22
Gammaproteobacteria	map00650	Butanoate metabolism	2			Clostridia	map04714	Thermogenesis	6
Gammaproteobacteria	map00670	One carbon pool by folate	1			Clostridia	map04724	Glutamatergic synapse	9
Gammaproteobacteria	map00680	Methane metabolism	2			Clostridia	map04727	GABAergic synapse	9
Gammaproteobacteria	map00710	Carbon fixation in photosynthetic organisms	1			Clostridia	map04910	Insulin signaling pathway	96
Gammaproteobacteria	map00720	Carbon fixation pathways in prokaryotes	5			Clostridia	map04914	Progesterone-mediated oocyte maturation	22
Gammaproteobacteria	map00760	Nicotinate and nicotinamide metabolism	1			Clostridia	map04915	Estrogen signaling pathway	22
Gammaproteobacteria	map00900	Terpenoid backbone biosynthesis	2			Clostridia	map04917	Prolactin signaling pathway	3
Gammaproteobacteria	map00910	Nitrogen metabolism	2			Clostridia	map04920	Adipocytokine signaling pathway	29
Gammaproteobacteria	map01100	Metabolic pathways	8			Clostridia	map04922	Glucagon signaling pathway	112
Gammaproteobacteria	map01110	Biosynthesis of secondary metabolites	4			Clostridia	map04930	Type II diabetes mellitus	8
Gammaproteobacteria	map01120	Microbial metabolism in diverse environments	7			Clostridia	map04931	Insulin resistance	96
Gammaproteobacteria	map01130		3			Clostridia	map04940	Type I diabetes mellitus	176
Gammaproteobacteria	map01200	Carbon metabolism	6			Clostridia	map04964	Proximal tubule bicarbonate reclamation	76
Gammaproteobacteria	map01212	Fatty acid metabolism	2			Clostridia	map05010	Alzheimer disease	107
Gammaproteobacteria	map01230	Biosynthesis of amino acids	1			Clostridia	map05100	Bacterial invasion of epithelial cells	7
Gammaproteobacteria	map02020	Two-component system	5			Clostridia	map05132	Salmonella infection	394
Gammaproteobacteria	map02040	Flagellar assembly	3			Clostridia	map05134	Legionellosis	572
Gammaproteobacteria	map03010	Ribosome	2			Clostridia	map05152	Tuberculosis	243
Gammaproteobacteria	map04066	HIF-1 signaling pathway	1			Clostridia	map05165	Human papillomavirus infection	8
Gammaproteobacteria	map04621	NOD-like receptor signaling pathway	3			Clostridia	map05200	Pathways in cancer	22
Gammaproteobacteria	map04626	Plant-pathogen interaction	3			Clostridia	map05203	Viral carcinogenesis	8
Gammaproteobacteria	map05010	Alzheimer disease	1			Clostridia	map05215	Prostate cancer	22
Gammaproteobacteria	map05132	Salmonella infection	3			Clostridia	map05230	Central carbon metabolism in cancer	12
Gammaproteobacteria	map05134	Legionellosis	3			Clostridia	map05418	Fluid shear stress and atherosclerosis	22
Insecta	map02010	ABC transporters	2			Coriobacteriia	map00010	Glycolysis / Gluconeogenesis	1
Insecta	map02020	Two-component system	1			Coriobacteriia	map00020	Citrate cycle (TCA cycle)	1
Insecta	map02040	Flagellar assembly	1			Coriobacteriia	map00260	Glycine, serine and threonine metabolism	1
Insecta	map04621	NOD-like receptor signaling pathway	1			Coriobacteriia	map00330	Arginine and proline metabolism	1
Insecta	map04626	Plant-pathogen interaction	1			Coriobacteriia	map00620	Pyruvate metabolism	1
Insecta	map05132	Salmonella infection	1			Coriobacteriia	map00650	Butanoate metabolism	1
Insecta	map05134	Legionellosis	1			Coriobacteriia	map00720	Carbon fixation pathways in prokaryotes	2
Kinetoplastea	map00010	Glycolysis / Gluconeogenesis	1			Coriobacteriia	map01100	Metabolic pathways	2
Kinetoplastea	map00710	Carbon fixation in photosynthetic organisms	1			Coriobacteriia	map01120	Microbial metabolism in diverse environments	2
Kinetoplastea	map01100	Metabolic pathways	1			Coriobacteriia	map01130		1
Kinetoplastea	map01110	Biosynthesis of secondary metabolites	1			Coriobacteriia	map01200	Carbon metabolism	2
Kinetoplastea	map01120	Microbial metabolism in diverse environments	1			Coriobacteriia	map02010	ABC transporters	1
Kinetoplastea	map01130		1			Coriobacteriia	map03010	Ribosome	1
Kinetoplastea	map01200	Carbon metabolism	1			Cytophagia	map00260	Glycine, serine and threonine metabolism	1
Kinetoplastea	map01230	Biosynthesis of amino acids	1			Cytophagia	map00460	Cyanoamino acid metabolism	1
Kinetoplastea	map04066	HIF-1 signaling pathway	1			Cytophagia	map00630	Glyoxylate and dicarboxylate metabolism	1
Kinetoplastea	map05010	Alzheimer disease	1			Cytophagia	map00670	One carbon pool by folate	1
Ktedonobacteria	map00010	Glycolysis / Gluconeogenesis	1			Cytophagia	map00680	Methane metabolism	1
Ktedonobacteria	map00051	Fructose and mannose metabolism	1			Cytophagia	map01100	Metabolic pathways	1
Ktedonobacteria	map00562	Inositol phosphate metabolism	1			Cytophagia	map01110	Biosynthesis of secondary metabolites	1
Ktedonobacteria	map00710	Carbon fixation in photosynthetic organisms	1			Cytophagia	map01120	Microbial metabolism in diverse environments	1
Ktedonobacteria	map01100	Metabolic pathways	1			Cytophagia	map01130		1
Ktedonobacteria	map01110	Biosynthesis of secondary metabolites	1			Cytophagia	map01200	Carbon metabolism	1
Ktedonobacteria	map01120	Microbial metabolism in diverse environments	1			Cytophagia	map01230	Biosynthesis of amino acids	1
Ktedonobacteria	map01130		1			Cytophagia	map01523	Antifolate resistance	1
Ktedonobacteria	map01200	Carbon metabolism	1			Cytophagia	map02010	ABC transporters	1
Ktedonobacteria	map01230	Biosynthesis of amino acids	1			Deferribacteres	map00010	Glycolysis / Gluconeogenesis	23
Methanobacteria	map00511	Other glycan degradation	1			Deferribacteres	map00020	Citrate cycle (TCA cycle)	16
Methanobacteria	map00550	Peptidoglycan biosynthesis	1			Deferribacteres	map00030	Pentose phosphate pathway	6
Methanobacteria	map01100	Metabolic pathways	1			Deferribacteres	map00051	Fructose and mannose metabolism	8
Methanobacteria	map01502	Vancomycin resistance	1			Deferribacteres	map00052	Galactose metabolism	2
Methanobacteria	map02020	Two-component system	1			Deferribacteres	map00061	Fatty acid biosynthesis	3
Methanobacteria	map05100	Bacterial invasion of epithelial cells	1			Deferribacteres	map00190	Oxidative phosphorylation	16
Mollicutes	map00010	Glycolysis / Gluconeogenesis	1			Deferribacteres	map00195	Photosynthesis	8
Mollicutes	map00710	Carbon fixation in photosynthetic organisms	1			Deferribacteres	map00270	Cysteine and methionine metabolism	6
Mollicutes	map01100	Metabolic pathways	1			Deferribacteres	map00280	Valine, leucine and isoleucine degradation	11
Mollicutes	map01110	Biosynthesis of secondary metabolites	1			Deferribacteres	map00380	Tryptophan metabolism	4
Mollicutes	map01120	Microbial metabolism in diverse environments	1			Deferribacteres	map00562	Inositol phosphate metabolism	2
Mollicutes	map01130		1			Deferribacteres	map00620	Pyruvate metabolism	17
Mollicutes	map01200	Carbon metabolism	1			Deferribacteres	map00630	Glyoxylate and dicarboxylate metabolism	37
Mollicutes	map01230	Biosynthesis of amino acids	1			Deferribacteres	map00633	Nitrotoluene degradation	8
Mollicutes	map04066	HIF-1 signaling pathway	1			Deferribacteres	map00640	Propanoate metabolism	14
Mollicutes	map05010	Alzheimer disease	1			Deferribacteres	map00650	Butanoate metabolism	5
Negativicutes	map00020	Citrate cycle (TCA cycle)	1			Deferribacteres	map00680	Methane metabolism	30
Negativicutes	map00270	Cysteine and methionine metabolism	1			Deferribacteres	map00710	Carbon fixation in photosynthetic organisms	23
Negativicutes	map00620	Pyruvate metabolism	7			Deferribacteres	map00720	Carbon fixation pathways in prokaryotes	16
Negativicutes	map00630	Glyoxylate and dicarboxylate metabolism	1			Deferribacteres	map00910	Nitrogen metabolism	5
Negativicutes	map00640	Propanoate metabolism	6			Deferribacteres	map01100	Metabolic pathways	77
Negativicutes	map00650	Butanoate metabolism	6			Deferribacteres	map01110	Biosynthesis of secondary metabolites	39
Negativicutes	map00670	One carbon pool by folate	3			Deferribacteres	map01120	Microbial metabolism in diverse environments	77
Negativicutes	map00680	Methane metabolism	1			Deferribacteres	map01130		46
Negativicutes	map00710	Carbon fixation in photosynthetic organisms	1			Deferribacteres	map01200	Carbon metabolism	68
Negativicutes	map00720	Carbon fixation pathways in prokaryotes	4			Deferribacteres	map01212	Fatty acid metabolism	3
Negativicutes	map01100	Metabolic pathways	10			Deferribacteres	map01230	Biosynthesis of amino acids	16
Negativicutes	map01110	Biosynthesis of secondary metabolites	1			Deferribacteres	map02010	ABC transporters	5
Negativicutes	map01120	Microbial metabolism in diverse environments	10			Deferribacteres	map02020	Two-component system	37
Negativicutes	map01130		1			Deferribacteres	map02024	Quorum sensing	3
Negativicutes	map01200	Carbon metabolism	4			Deferribacteres	map02040	Flagellar assembly	34
Oligoflexia	map02020	Two-component system	3			Deferribacteres	map03010	Ribosome	4
Oligoflexia	map02040	Flagellar assembly	3			Deferribacteres	map03018	RNA degradation	15
Oligoflexia	map04621	NOD-like receptor signaling pathway	3			Deferribacteres	map04011	MAPK signaling pathway - yeast	4
Oligoflexia	map04626	Plant-pathogen interaction	3			Deferribacteres	map04016	MAPK signaling pathway - plant	4
Oligoflexia	map05132	Salmonella infection	3			Deferribacteres	map04066	HIF-1 signaling pathway	8
Oligoflexia	map05134	Legionellosis	3			Deferribacteres	map04068	FoxO signaling pathway	4
Pucciniomycetes	map00500	Starch and sucrose metabolism	1			Deferribacteres	map04146	Peroxisome	4
Pucciniomycetes	map00520	Amino sugar and nucleotide sugar metabolism	1			Deferribacteres	map04152	AMPK signaling pathway	2
Pucciniomycetes	map01100	Metabolic pathways	1			Deferribacteres	map04211	Longevity regulating pathway	4
Pucciniomycetes	map01110	Biosynthesis of secondary metabolites	1			Deferribacteres	map04212	Longevity regulating pathway - worm	15
Pucciniomycetes	map02026	Biofilm formation - Escherichia coli	1			Deferribacteres	map04213	Longevity regulating pathway - multiple species	4
Saccharomycetes	map02020	Two-component system	3			Deferribacteres	map04621	NOD-like receptor signaling pathway	34
Saccharomycetes	map02040	Flagellar assembly	3			Deferribacteres	map04626	Plant-pathogen interaction	34
Saccharomycetes	map04621	NOD-like receptor signaling pathway	3			Deferribacteres	map04940	Type I diabetes mellitus	11
Saccharomycetes	map04626	Plant-pathogen interaction	3			Deferribacteres	map05010	Alzheimer disease	6
Saccharomycetes	map05132	Salmonella infection	3			Deferribacteres	map05014	Amyotrophic lateral sclerosis	4
Saccharomycetes	map05134	Legionellosis	3			Deferribacteres	map05132	Salmonella infection	34
Sphingobacteriia	map03010	Ribosome	4			Deferribacteres	map05134	Legionellosis	50
Spirochaetia	map00010	Glycolysis / Gluconeogenesis	1			Deferribacteres	map05152	Tuberculosis	11
Spirochaetia	map00310	Lysine degradation	1			Deferribacteres	map05230	Central carbon metabolism in cancer	2
Spirochaetia	map00561	Glycerolipid metabolism	1			Dehalococcoidia	map00670	One carbon pool by folate	1
Spirochaetia	map00640	Propanoate metabolism	1			Dehalococcoidia	map00720	Carbon fixation pathways in prokaryotes	1
Spirochaetia	map00680	Methane metabolism	1			Dehalococcoidia	map01100	Metabolic pathways	1
Spirochaetia	map00720	Carbon fixation pathways in prokaryotes	2			Dehalococcoidia	map01120	Microbial metabolism in diverse environments	1
Spirochaetia	map01100	Metabolic pathways	1			Dehalococcoidia	map01200	Carbon metabolism	1
Spirochaetia	map01110	Biosynthesis of secondary metabolites	1			Deltaproteobacteria	map00010	Glycolysis / Gluconeogenesis	10
Spirochaetia	map01120	Microbial metabolism in diverse environments	3			Deltaproteobacteria	map00020	Citrate cycle (TCA cycle)	4
Spirochaetia	map01130		1			Deltaproteobacteria	map00030	Pentose phosphate pathway	4
Spirochaetia	map01200	Carbon metabolism	3			Deltaproteobacteria	map00040	Pentose and glucuronate interconversions	3
Spirochaetia	map01230	Biosynthesis of amino acids	1			Deltaproteobacteria	map00051	Fructose and mannose metabolism	4
Spirochaetia	map02010	ABC transporters	5			Deltaproteobacteria	map00052	Galactose metabolism	3
Spirochaetia	map03018	RNA degradation	1			Deltaproteobacteria	map00071	Fatty acid degradation	1
Spirochaetia	map04066	HIF-1 signaling pathway	1			Deltaproteobacteria	map00190	Oxidative phosphorylation	3
Trematoda	map00230	Purine metabolism	1			Deltaproteobacteria	map00195	Photosynthesis	3
Trematoda	map00240	Pyrimidine metabolism	1			Deltaproteobacteria	map00230	Purine metabolism	7
Trematoda	map00511	Other glycan degradation	1			Deltaproteobacteria	map00250	Alanine, aspartate and glutamate metabolism	1
Trematoda	map00550	Peptidoglycan biosynthesis	1			Deltaproteobacteria	map00261	Monobactam biosynthesis	7
Trematoda	map00730	Thiamine metabolism	1			Deltaproteobacteria	map00350	Tyrosine metabolism	1
Trematoda	map00760	Nicotinate and nicotinamide metabolism	1			Deltaproteobacteria	map00430	Taurine and hypotaurine metabolism	4
Trematoda	map00790	Folate biosynthesis	1			Deltaproteobacteria	map00450	Selenocompound metabolism	7
Trematoda	map01100	Metabolic pathways	2			Deltaproteobacteria	map00500	Starch and sucrose metabolism	4
Trematoda	map01110	Biosynthesis of secondary metabolites	1			Deltaproteobacteria	map00520	Amino sugar and nucleotide sugar metabolism	3
Trematoda	map01502	Vancomycin resistance	1			Deltaproteobacteria	map00562	Inositol phosphate metabolism	1
Trematoda	map02020	Two-component system	2			Deltaproteobacteria	map00620	Pyruvate metabolism	12
Trematoda	map05100	Bacterial invasion of epithelial cells	1			Deltaproteobacteria	map00625	Chloroalkane and chloroalkene degradation	1
Verrucomicrobiae	map00010	Glycolysis / Gluconeogenesis	1			Deltaproteobacteria	map00626	Naphthalene degradation	1
Verrucomicrobiae	map00680	Methane metabolism	1			Deltaproteobacteria	map00633	Nitrotoluene degradation	3
Verrucomicrobiae	map01100	Metabolic pathways	1			Deltaproteobacteria	map00640	Propanoate metabolism	4
Verrucomicrobiae	map01110	Biosynthesis of secondary metabolites	1			Deltaproteobacteria	map00650	Butanoate metabolism	8
Verrucomicrobiae	map01120	Microbial metabolism in diverse environments	1			Deltaproteobacteria	map00680	Methane metabolism	6
Verrucomicrobiae	map01130		1			Deltaproteobacteria	map00710	Carbon fixation in photosynthetic organisms	6
Verrucomicrobiae	map01200	Carbon metabolism	1			Deltaproteobacteria	map00720	Carbon fixation pathways in prokaryotes	10
Verrucomicrobiae	map01230	Biosynthesis of amino acids	1			Deltaproteobacteria	map00760	Nicotinate and nicotinamide metabolism	4
Verrucomicrobiae	map03018	RNA degradation	1			Deltaproteobacteria	map00920	Sulfur metabolism	11
Verrucomicrobiae	map04066	HIF-1 signaling pathway	1			Deltaproteobacteria	map01100	Metabolic pathways	43
						Deltaproteobacteria	map01110	Biosynthesis of secondary metabolites	7
						Deltaproteobacteria	map01120	Microbial metabolism in diverse environments	32
						Deltaproteobacteria	map01130		20
						Deltaproteobacteria	map01200	Carbon metabolism	16
						Deltaproteobacteria	map01220	Degradation of aromatic compounds	1
						Deltaproteobacteria	map01230	Biosynthesis of amino acids	5
						Deltaproteobacteria	map02010	ABC transporters	1
						Deltaproteobacteria	map02020	Two-component system	6
						Deltaproteobacteria	map02024	Quorum sensing	1
						Deltaproteobacteria	map02026	Biofilm formation - Escherichia coli	1
						Deltaproteobacteria	map02030	Bacterial chemotaxis	1
						Deltaproteobacteria	map02040	Flagellar assembly	4
						Deltaproteobacteria	map03010	Ribosome	12
						Deltaproteobacteria	map03018	RNA degradation	11
						Deltaproteobacteria	map04066	HIF-1 signaling pathway	1
						Deltaproteobacteria	map04122	Sulfur relay system	2
						Deltaproteobacteria	map04212	Longevity regulating pathway - worm	11
						Deltaproteobacteria	map04217	Necroptosis	1
						Deltaproteobacteria	map04621	NOD-like receptor signaling pathway	4
						Deltaproteobacteria	map04626	Plant-pathogen interaction	4
						Deltaproteobacteria	map04910	Insulin signaling pathway	1
						Deltaproteobacteria	map04922	Glucagon signaling pathway	1
						Deltaproteobacteria	map04931	Insulin resistance	1
						Deltaproteobacteria	map04940	Type I diabetes mellitus	7
						Deltaproteobacteria	map05010	Alzheimer disease	1
						Deltaproteobacteria	map05132	Salmonella infection	4
						Deltaproteobacteria	map05134	Legionellosis	11
						Deltaproteobacteria	map05152	Tuberculosis	11
						Demospongiae	map02020	Two-component system	3
						Demospongiae	map02040	Flagellar assembly	3
						Demospongiae	map04621	NOD-like receptor signaling pathway	3
						Demospongiae	map04626	Plant-pathogen interaction	3
						Demospongiae	map05132	Salmonella infection	3
						Demospongiae	map05134	Legionellosis	3
						Dothideomycetes	map00650	Butanoate metabolism	1
						Dothideomycetes	map01200	Carbon metabolism	1
						Enoplea	map02010	ABC transporters	1
						Epsilonproteobacteria	map00010	Glycolysis / Gluconeogenesis	1
						Epsilonproteobacteria	map00020	Citrate cycle (TCA cycle)	1
						Epsilonproteobacteria	map00500	Starch and sucrose metabolism	1
						Epsilonproteobacteria	map00620	Pyruvate metabolism	1
						Epsilonproteobacteria	map00650	Butanoate metabolism	1
						Epsilonproteobacteria	map00720	Carbon fixation pathways in prokaryotes	1
						Epsilonproteobacteria	map01100	Metabolic pathways	2
						Epsilonproteobacteria	map01120	Microbial metabolism in diverse environments	1
						Epsilonproteobacteria	map01130		1
						Epsilonproteobacteria	map01200	Carbon metabolism	1
						Epsilonproteobacteria	map03010	Ribosome	1
						Epsilonproteobacteria	map03018	RNA degradation	1
						Epsilonproteobacteria	map04212	Longevity regulating pathway - worm	1
						Epsilonproteobacteria	map04940	Type I diabetes mellitus	1
						Epsilonproteobacteria	map05134	Legionellosis	1
						Epsilonproteobacteria	map05152	Tuberculosis	1
						Erysipelotrichia	map00010	Glycolysis / Gluconeogenesis	1
						Erysipelotrichia	map00020	Citrate cycle (TCA cycle)	1
						Erysipelotrichia	map00620	Pyruvate metabolism	3
						Erysipelotrichia	map00710	Carbon fixation in photosynthetic organisms	3
						Erysipelotrichia	map00720	Carbon fixation pathways in prokaryotes	2
						Erysipelotrichia	map01100	Metabolic pathways	3
						Erysipelotrichia	map01110	Biosynthesis of secondary metabolites	1
						Erysipelotrichia	map01120	Microbial metabolism in diverse environments	3
						Erysipelotrichia	map01130		1
						Erysipelotrichia	map01200	Carbon metabolism	3
						Euglenida	map00010	Glycolysis / Gluconeogenesis	1
						Euglenida	map00710	Carbon fixation in photosynthetic organisms	1
						Euglenida	map01100	Metabolic pathways	1
						Euglenida	map01110	Biosynthesis of secondary metabolites	1
						Euglenida	map01120	Microbial metabolism in diverse environments	1
						Euglenida	map01130		1
						Euglenida	map01200	Carbon metabolism	1
						Euglenida	map01230	Biosynthesis of amino acids	1
						Euglenida	map04066	HIF-1 signaling pathway	1
						Euglenida	map05010	Alzheimer disease	1
						Eumycetozoa	map00480	Glutathione metabolism	1
						Eumycetozoa	map01100	Metabolic pathways	1
						Flavobacteriia	map00010	Glycolysis / Gluconeogenesis	5
						Flavobacteriia	map00020	Citrate cycle (TCA cycle)	2
						Flavobacteriia	map00260	Glycine, serine and threonine metabolism	1
						Flavobacteriia	map00460	Cyanoamino acid metabolism	1
						Flavobacteriia	map00500	Starch and sucrose metabolism	2
						Flavobacteriia	map00620	Pyruvate metabolism	2
						Flavobacteriia	map00630	Glyoxylate and dicarboxylate metabolism	1
						Flavobacteriia	map00670	One carbon pool by folate	1
						Flavobacteriia	map00680	Methane metabolism	3
						Flavobacteriia	map00710	Carbon fixation in photosynthetic organisms	3
						Flavobacteriia	map01100	Metabolic pathways	8
						Flavobacteriia	map01110	Biosynthesis of secondary metabolites	8
						Flavobacteriia	map01120	Microbial metabolism in diverse environments	6
						Flavobacteriia	map01130		6
						Flavobacteriia	map01200	Carbon metabolism	6
						Flavobacteriia	map01230	Biosynthesis of amino acids	4
						Flavobacteriia	map01523	Antifolate resistance	1
						Flavobacteriia	map02010	ABC transporters	1
						Flavobacteriia	map02020	Two-component system	1
						Flavobacteriia	map02026	Biofilm formation - Escherichia coli	2
						Flavobacteriia	map02030	Bacterial chemotaxis	1
						Flavobacteriia	map02040	Flagellar assembly	1
						Flavobacteriia	map03018	RNA degradation	3
						Flavobacteriia	map04066	HIF-1 signaling pathway	2
						Flavobacteriia	map04212	Longevity regulating pathway - worm	1
						Flavobacteriia	map04217	Necroptosis	2
						Flavobacteriia	map04621	NOD-like receptor signaling pathway	1
						Flavobacteriia	map04626	Plant-pathogen interaction	1
						Flavobacteriia	map04910	Insulin signaling pathway	2
						Flavobacteriia	map04922	Glucagon signaling pathway	2
						Flavobacteriia	map04931	Insulin resistance	2
						Flavobacteriia	map04940	Type I diabetes mellitus	1
						Flavobacteriia	map05132	Salmonella infection	1
						Flavobacteriia	map05134	Legionellosis	2
						Flavobacteriia	map05152	Tuberculosis	1
						Fusobacteriia	map00010	Glycolysis / Gluconeogenesis	1
						Fusobacteriia	map00020	Citrate cycle (TCA cycle)	1
						Fusobacteriia	map00071	Fatty acid degradation	1
						Fusobacteriia	map00072		1
						Fusobacteriia	map00280	Valine, leucine and isoleucine degradation	1
						Fusobacteriia	map00310	Lysine degradation	1
						Fusobacteriia	map00350	Tyrosine metabolism	1
						Fusobacteriia	map00362	Benzoate degradation	1
						Fusobacteriia	map00380	Tryptophan metabolism	1
						Fusobacteriia	map00500	Starch and sucrose metabolism	2
						Fusobacteriia	map00620	Pyruvate metabolism	2
						Fusobacteriia	map00630	Glyoxylate and dicarboxylate metabolism	1
						Fusobacteriia	map00640	Propanoate metabolism	1
						Fusobacteriia	map00650	Butanoate metabolism	1
						Fusobacteriia	map00710	Carbon fixation in photosynthetic organisms	1
						Fusobacteriia	map00720	Carbon fixation pathways in prokaryotes	1
						Fusobacteriia	map00900	Terpenoid backbone biosynthesis	1
						Fusobacteriia	map01100	Metabolic pathways	4
						Fusobacteriia	map01110	Biosynthesis of secondary metabolites	4
						Fusobacteriia	map01120	Microbial metabolism in diverse environments	2
						Fusobacteriia	map01130		2
						Fusobacteriia	map01200	Carbon metabolism	2
						Fusobacteriia	map01212	Fatty acid metabolism	1
						Fusobacteriia	map02020	Two-component system	1
						Fusobacteriia	map02026	Biofilm formation - Escherichia coli	2
						Fusobacteriia	map03010	Ribosome	1
						Fusobacteriia	map04217	Necroptosis	2
						Fusobacteriia	map04910	Insulin signaling pathway	2
						Fusobacteriia	map04922	Glucagon signaling pathway	2
						Fusobacteriia	map04931	Insulin resistance	2
						Gammaproteobacteria	map00010	Glycolysis / Gluconeogenesis	5
						Gammaproteobacteria	map00020	Citrate cycle (TCA cycle)	1
						Gammaproteobacteria	map00030	Pentose phosphate pathway	1
						Gammaproteobacteria	map00051	Fructose and mannose metabolism	3
						Gammaproteobacteria	map00052	Galactose metabolism	3
						Gammaproteobacteria	map00071	Fatty acid degradation	4
						Gammaproteobacteria	map00072		2
						Gammaproteobacteria	map00220	Arginine biosynthesis	3
						Gammaproteobacteria	map00230	Purine metabolism	1
						Gammaproteobacteria	map00240	Pyrimidine metabolism	1
						Gammaproteobacteria	map00250	Alanine, aspartate and glutamate metabolism	3
						Gammaproteobacteria	map00270	Cysteine and methionine metabolism	1
						Gammaproteobacteria	map00280	Valine, leucine and isoleucine degradation	2
						Gammaproteobacteria	map00310	Lysine degradation	2
						Gammaproteobacteria	map00330	Arginine and proline metabolism	1
						Gammaproteobacteria	map00350	Tyrosine metabolism	3
						Gammaproteobacteria	map00360	Phenylalanine metabolism	1
						Gammaproteobacteria	map00362	Benzoate degradation	2
						Gammaproteobacteria	map00380	Tryptophan metabolism	2
						Gammaproteobacteria	map00400	Phenylalanine, tyrosine and tryptophan biosynthesis	1
						Gammaproteobacteria	map00401	Novobiocin biosynthesis	1
						Gammaproteobacteria	map00500	Starch and sucrose metabolism	1
						Gammaproteobacteria	map00511	Other glycan degradation	2
						Gammaproteobacteria	map00562	Inositol phosphate metabolism	1
						Gammaproteobacteria	map00600	Sphingolipid metabolism	2
						Gammaproteobacteria	map00620	Pyruvate metabolism	5
						Gammaproteobacteria	map00625	Chloroalkane and chloroalkene degradation	2
						Gammaproteobacteria	map00626	Naphthalene degradation	2
						Gammaproteobacteria	map00630	Glyoxylate and dicarboxylate metabolism	2
						Gammaproteobacteria	map00640	Propanoate metabolism	2
						Gammaproteobacteria	map00650	Butanoate metabolism	5
						Gammaproteobacteria	map00680	Methane metabolism	4
						Gammaproteobacteria	map00710	Carbon fixation in photosynthetic organisms	1
						Gammaproteobacteria	map00720	Carbon fixation pathways in prokaryotes	6
						Gammaproteobacteria	map00760	Nicotinate and nicotinamide metabolism	1
						Gammaproteobacteria	map00900	Terpenoid backbone biosynthesis	2
						Gammaproteobacteria	map00910	Nitrogen metabolism	2
						Gammaproteobacteria	map00950	Isoquinoline alkaloid biosynthesis	1
						Gammaproteobacteria	map00960	Tropane, piperidine and pyridine alkaloid biosynthesis	1
						Gammaproteobacteria	map01100	Metabolic pathways	14
						Gammaproteobacteria	map01110	Biosynthesis of secondary metabolites	8
						Gammaproteobacteria	map01120	Microbial metabolism in diverse environments	11
						Gammaproteobacteria	map01130		8
						Gammaproteobacteria	map01200	Carbon metabolism	7
						Gammaproteobacteria	map01210	2-Oxocarboxylic acid metabolism	1
						Gammaproteobacteria	map01212	Fatty acid metabolism	2
						Gammaproteobacteria	map01220	Degradation of aromatic compounds	2
						Gammaproteobacteria	map01230	Biosynthesis of amino acids	2
						Gammaproteobacteria	map02020	Two-component system	7
						Gammaproteobacteria	map02040	Flagellar assembly	6
						Gammaproteobacteria	map03010	Ribosome	2
						Gammaproteobacteria	map04621	NOD-like receptor signaling pathway	5
						Gammaproteobacteria	map04626	Plant-pathogen interaction	5
						Gammaproteobacteria	map05132	Salmonella infection	5
						Gammaproteobacteria	map05134	Legionellosis	5
						Gastropoda	map00010	Glycolysis / Gluconeogenesis	1
						Gastropoda	map00020	Citrate cycle (TCA cycle)	1
						Gastropoda	map00620	Pyruvate metabolism	1
						Gastropoda	map01100	Metabolic pathways	1
						Gastropoda	map01110	Biosynthesis of secondary metabolites	1
						Gastropoda	map01120	Microbial metabolism in diverse environments	1
						Gastropoda	map01130		1
						Gastropoda	map03320	PPAR signaling pathway	1
						Gastropoda	map04068	FoxO signaling pathway	1
						Gastropoda	map04151	PI3K-Akt signaling pathway	1
						Gastropoda	map04152	AMPK signaling pathway	1
						Gastropoda	map04910	Insulin signaling pathway	1
						Gastropoda	map04920	Adipocytokine signaling pathway	1
						Gastropoda	map04922	Glucagon signaling pathway	1
						Gastropoda	map04931	Insulin resistance	1
						Gastropoda	map04964	Proximal tubule bicarbonate reclamation	1
						Insecta	map01501	beta-Lactam resistance	1
						Insecta	map02010	ABC transporters	2
						Insecta	map02020	Two-component system	1
						Insecta	map02024	Quorum sensing	2
						Insecta	map02040	Flagellar assembly	1
						Insecta	map04621	NOD-like receptor signaling pathway	1
						Insecta	map04626	Plant-pathogen interaction	1
						Insecta	map05132	Salmonella infection	1
						Insecta	map05134	Legionellosis	1
						Kinetoplastea	map00010	Glycolysis / Gluconeogenesis	2
						Kinetoplastea	map00710	Carbon fixation in photosynthetic organisms	2
						Kinetoplastea	map01100	Metabolic pathways	2
						Kinetoplastea	map01110	Biosynthesis of secondary metabolites	2
						Kinetoplastea	map01120	Microbial metabolism in diverse environments	2
						Kinetoplastea	map01130		2
						Kinetoplastea	map01200	Carbon metabolism	2
						Kinetoplastea	map01230	Biosynthesis of amino acids	2
						Kinetoplastea	map04066	HIF-1 signaling pathway	2
						Kinetoplastea	map05010	Alzheimer disease	2
						Ktedonobacteria	map00010	Glycolysis / Gluconeogenesis	1
						Ktedonobacteria	map00051	Fructose and mannose metabolism	1
						Ktedonobacteria	map00562	Inositol phosphate metabolism	1
						Ktedonobacteria	map00710	Carbon fixation in photosynthetic organisms	1
						Ktedonobacteria	map01100	Metabolic pathways	1
						Ktedonobacteria	map01110	Biosynthesis of secondary metabolites	1
						Ktedonobacteria	map01120	Microbial metabolism in diverse environments	1
						Ktedonobacteria	map01130		1
						Ktedonobacteria	map01200	Carbon metabolism	1
						Ktedonobacteria	map01230	Biosynthesis of amino acids	1
						Magnoliopsida	map00010	Glycolysis / Gluconeogenesis	1
						Magnoliopsida	map00270	Cysteine and methionine metabolism	1
						Magnoliopsida	map00620	Pyruvate metabolism	1
						Magnoliopsida	map00640	Propanoate metabolism	1
						Magnoliopsida	map01100	Metabolic pathways	1
						Magnoliopsida	map01110	Biosynthesis of secondary metabolites	1
						Magnoliopsida	map01120	Microbial metabolism in diverse environments	1
						Magnoliopsida	map01130		1
						Magnoliopsida	map03018	RNA degradation	1
						Magnoliopsida	map04212	Longevity regulating pathway - worm	1
						Magnoliopsida	map04922	Glucagon signaling pathway	1
						Magnoliopsida	map04940	Type I diabetes mellitus	1
						Magnoliopsida	map05134	Legionellosis	1
						Magnoliopsida	map05152	Tuberculosis	1
						Mammalia	map00680	Methane metabolism	1
						Mammalia	map00720	Carbon fixation pathways in prokaryotes	1
						Mammalia	map01120	Microbial metabolism in diverse environments	1
						Mammalia	map01200	Carbon metabolism	1
						Methanobacteria	map00511	Other glycan degradation	1
						Methanobacteria	map00550	Peptidoglycan biosynthesis	1
						Methanobacteria	map01100	Metabolic pathways	1
						Methanobacteria	map01502	Vancomycin resistance	1
						Methanobacteria	map02020	Two-component system	1
						Methanobacteria	map05100	Bacterial invasion of epithelial cells	1
						Methanomicrobia	map03018	RNA degradation	1
						Methanomicrobia	map04212	Longevity regulating pathway - worm	1
						Methanomicrobia	map05152	Tuberculosis	1
						Mollicutes	map00010	Glycolysis / Gluconeogenesis	1
						Mollicutes	map00710	Carbon fixation in photosynthetic organisms	1
						Mollicutes	map01100	Metabolic pathways	1
						Mollicutes	map01110	Biosynthesis of secondary metabolites	1
						Mollicutes	map01120	Microbial metabolism in diverse environments	1
						Mollicutes	map01130		1
						Mollicutes	map01200	Carbon metabolism	1
						Mollicutes	map01230	Biosynthesis of amino acids	1
						Mollicutes	map02020	Two-component system	1
						Mollicutes	map02040	Flagellar assembly	1
						Mollicutes	map04066	HIF-1 signaling pathway	1
						Mollicutes	map04621	NOD-like receptor signaling pathway	1
						Mollicutes	map04626	Plant-pathogen interaction	1
						Mollicutes	map05010	Alzheimer disease	1
						Mollicutes	map05132	Salmonella infection	1
						Mollicutes	map05134	Legionellosis	1
						Negativicutes	map00030	Pentose phosphate pathway	1
						Negativicutes	map00261	Monobactam biosynthesis	1
						Negativicutes	map00300	Lysine biosynthesis	1
						Negativicutes	map00362	Benzoate degradation	1
						Negativicutes	map00620	Pyruvate metabolism	8
						Negativicutes	map00640	Propanoate metabolism	8
						Negativicutes	map00643	Styrene degradation	3
						Negativicutes	map00650	Butanoate metabolism	5
						Negativicutes	map00670	One carbon pool by folate	1
						Negativicutes	map00710	Carbon fixation in photosynthetic organisms	1
						Negativicutes	map00720	Carbon fixation pathways in prokaryotes	1
						Negativicutes	map01051	Biosynthesis of ansamycins	1
						Negativicutes	map01100	Metabolic pathways	12
						Negativicutes	map01110	Biosynthesis of secondary metabolites	2
						Negativicutes	map01120	Microbial metabolism in diverse environments	12
						Negativicutes	map01130		2
						Negativicutes	map01200	Carbon metabolism	2
						Negativicutes	map01220	Degradation of aromatic compounds	1
						Negativicutes	map01230	Biosynthesis of amino acids	2
						Negativicutes	map03010	Ribosome	1
						Nitrososphaeria	map02020	Two-component system	1
						Nitrososphaeria	map02040	Flagellar assembly	1
						Nitrososphaeria	map04621	NOD-like receptor signaling pathway	1
						Nitrososphaeria	map04626	Plant-pathogen interaction	1
						Nitrososphaeria	map05132	Salmonella infection	1
						Nitrososphaeria	map05134	Legionellosis	1
						Nitrospira	map00670	One carbon pool by folate	2
						Nitrospira	map00720	Carbon fixation pathways in prokaryotes	2
						Nitrospira	map01100	Metabolic pathways	2
						Nitrospira	map01120	Microbial metabolism in diverse environments	2
						Nitrospira	map01200	Carbon metabolism	2
						Planctomycetia	map02010	ABC transporters	1
						Planctomycetia	map02030	Bacterial chemotaxis	1
						Pucciniomycetes	map02020	Two-component system	2
						Pucciniomycetes	map02040	Flagellar assembly	2
						Pucciniomycetes	map04621	NOD-like receptor signaling pathway	2
						Pucciniomycetes	map04626	Plant-pathogen interaction	2
						Pucciniomycetes	map05132	Salmonella infection	2
						Pucciniomycetes	map05134	Legionellosis	2
						Revtraviricetes	map02010	ABC transporters	1
						Saccharomycetes	map00071	Fatty acid degradation	1
						Saccharomycetes	map00072		1
						Saccharomycetes	map00280	Valine, leucine and isoleucine degradation	1
						Saccharomycetes	map00310	Lysine degradation	1
						Saccharomycetes	map00362	Benzoate degradation	1
						Saccharomycetes	map00380	Tryptophan metabolism	1
						Saccharomycetes	map00620	Pyruvate metabolism	1
						Saccharomycetes	map00630	Glyoxylate and dicarboxylate metabolism	1
						Saccharomycetes	map00640	Propanoate metabolism	1
						Saccharomycetes	map00650	Butanoate metabolism	1
						Saccharomycetes	map00720	Carbon fixation pathways in prokaryotes	1
						Saccharomycetes	map00900	Terpenoid backbone biosynthesis	1
						Saccharomycetes	map01100	Metabolic pathways	1
						Saccharomycetes	map01110	Biosynthesis of secondary metabolites	1
						Saccharomycetes	map01120	Microbial metabolism in diverse environments	1
						Saccharomycetes	map01130		1
						Saccharomycetes	map01200	Carbon metabolism	1
						Saccharomycetes	map01212	Fatty acid metabolism	1
						Saccharomycetes	map02020	Two-component system	2
						Saccharomycetes	map02040	Flagellar assembly	1
						Saccharomycetes	map04621	NOD-like receptor signaling pathway	1
						Saccharomycetes	map04626	Plant-pathogen interaction	1
						Saccharomycetes	map05132	Salmonella infection	1
						Saccharomycetes	map05134	Legionellosis	1
						Sordariomycetes	map00500	Starch and sucrose metabolism	1
						Sordariomycetes	map00520	Amino sugar and nucleotide sugar metabolism	1
						Sordariomycetes	map01100	Metabolic pathways	1
						Sordariomycetes	map01110	Biosynthesis of secondary metabolites	1
						Sordariomycetes	map02026	Biofilm formation - Escherichia coli	1
						Sphingobacteriia	map00680	Methane metabolism	2
						Sphingobacteriia	map00720	Carbon fixation pathways in prokaryotes	2
						Sphingobacteriia	map01120	Microbial metabolism in diverse environments	2
						Sphingobacteriia	map01200	Carbon metabolism	2
						Sphingobacteriia	map03010	Ribosome	4
						Spirochaetia	map00010	Glycolysis / Gluconeogenesis	2
						Spirochaetia	map00020	Citrate cycle (TCA cycle)	1
						Spirochaetia	map00561	Glycerolipid metabolism	1
						Spirochaetia	map00620	Pyruvate metabolism	1
						Spirochaetia	map00640	Propanoate metabolism	1
						Spirochaetia	map00650	Butanoate metabolism	1
						Spirochaetia	map00680	Methane metabolism	1
						Spirochaetia	map00720	Carbon fixation pathways in prokaryotes	1
						Spirochaetia	map01100	Metabolic pathways	2
						Spirochaetia	map01110	Biosynthesis of secondary metabolites	1
						Spirochaetia	map01120	Microbial metabolism in diverse environments	2
						Spirochaetia	map01130		2
						Spirochaetia	map01200	Carbon metabolism	2
						Spirochaetia	map01230	Biosynthesis of amino acids	1
						Spirochaetia	map01501	beta-Lactam resistance	1
						Spirochaetia	map02010	ABC transporters	5
						Spirochaetia	map02024	Quorum sensing	3
						Spirochaetia	map03018	RNA degradation	1
						Spirochaetia	map04066	HIF-1 signaling pathway	1
						Theionarchaea	map00010	Glycolysis / Gluconeogenesis	1
						Theionarchaea	map00020	Citrate cycle (TCA cycle)	1
						Theionarchaea	map00620	Pyruvate metabolism	1
						Theionarchaea	map01100	Metabolic pathways	1
						Theionarchaea	map01110	Biosynthesis of secondary metabolites	1
						Theionarchaea	map01120	Microbial metabolism in diverse environments	1
						Theionarchaea	map01130		1
						Theionarchaea	map03320	PPAR signaling pathway	1
						Theionarchaea	map04068	FoxO signaling pathway	1
						Theionarchaea	map04151	PI3K-Akt signaling pathway	1
						Theionarchaea	map04152	AMPK signaling pathway	1
						Theionarchaea	map04910	Insulin signaling pathway	1
						Theionarchaea	map04920	Adipocytokine signaling pathway	1
						Theionarchaea	map04922	Glucagon signaling pathway	1
						Theionarchaea	map04931	Insulin resistance	1
						Theionarchaea	map04964	Proximal tubule bicarbonate reclamation	1
						Thermococci	map00010	Glycolysis / Gluconeogenesis	2
						Thermococci	map00020	Citrate cycle (TCA cycle)	2
						Thermococci	map00620	Pyruvate metabolism	2
						Thermococci	map00710	Carbon fixation in photosynthetic organisms	2
						Thermococci	map01100	Metabolic pathways	2
						Thermococci	map01110	Biosynthesis of secondary metabolites	2
						Thermococci	map01120	Microbial metabolism in diverse environments	2
						Thermococci	map01130		2
						Thermococci	map01200	Carbon metabolism	2
						Tissierellia	map02020	Two-component system	2
						Tissierellia	map02040	Flagellar assembly	2
						Tissierellia	map04621	NOD-like receptor signaling pathway	2
						Tissierellia	map04626	Plant-pathogen interaction	2
						Tissierellia	map05132	Salmonella infection	2
						Tissierellia	map05134	Legionellosis	2
						Trematoda	map00230	Purine metabolism	1
						Trematoda	map00240	Pyrimidine metabolism	1
						Trematoda	map00511	Other glycan degradation	1
						Trematoda	map00550	Peptidoglycan biosynthesis	1
						Trematoda	map00730	Thiamine metabolism	1
						Trematoda	map00760	Nicotinate and nicotinamide metabolism	1
						Trematoda	map00790	Folate biosynthesis	1
						Trematoda	map01100	Metabolic pathways	2
						Trematoda	map01110	Biosynthesis of secondary metabolites	1
						Trematoda	map01501	beta-Lactam resistance	1
						Trematoda	map01502	Vancomycin resistance	1
						Trematoda	map02010	ABC transporters	1
						Trematoda	map02020	Two-component system	2
						Trematoda	map02024	Quorum sensing	1
						Trematoda	map05100	Bacterial invasion of epithelial cells	1
						Verrucomicrobiae	map00010	Glycolysis / Gluconeogenesis	1
						Verrucomicrobiae	map00680	Methane metabolism	1
						Verrucomicrobiae	map01100	Metabolic pathways	1
						Verrucomicrobiae	map01110	Biosynthesis of secondary metabolites	1
						Verrucomicrobiae	map01120	Microbial metabolism in diverse environments	1
						Verrucomicrobiae	map01130		1
						Verrucomicrobiae	map01200	Carbon metabolism	1
						Verrucomicrobiae	map01230	Biosynthesis of amino acids	1
						Verrucomicrobiae	map02020	Two-component system	1
						Verrucomicrobiae	map02040	Flagellar assembly	1
						Verrucomicrobiae	map03018	RNA degradation	1
						Verrucomicrobiae	map04066	HIF-1 signaling pathway	1
						Verrucomicrobiae	map04621	NOD-like receptor signaling pathway	1
						Verrucomicrobiae	map04626	Plant-pathogen interaction	1
						Verrucomicrobiae	map05132	Salmonella infection	1
						Verrucomicrobiae	map05134	Legionellosis	1

## Sheet: Order
DDA-PASEF						DIA-PASEF
Order	KEGG_Pathway	Pathway name	Total peptide count			Order	KEGG_Pathway	Pathway name	Total peptide count
Agaricales	map00010	Glycolysis / Gluconeogenesis	1			Acidaminococcales	map00362	Benzoate degradation	1
Agaricales	map00020	Citrate cycle (TCA cycle)	1			Acidaminococcales	map01100	Metabolic pathways	1
Agaricales	map00620	Pyruvate metabolism	1			Acidaminococcales	map01120	Microbial metabolism in diverse environments	1
Agaricales	map00650	Butanoate metabolism	1			Acidaminococcales	map01220	Degradation of aromatic compounds	1
Agaricales	map00720	Carbon fixation pathways in prokaryotes	1			Acidimicrobiales	map02020	Two-component system	1
Agaricales	map01100	Metabolic pathways	1			Acidimicrobiales	map02040	Flagellar assembly	1
Agaricales	map01120	Microbial metabolism in diverse environments	1			Acidimicrobiales	map04621	NOD-like receptor signaling pathway	1
Agaricales	map01130		1			Acidimicrobiales	map04626	Plant-pathogen interaction	1
Agaricales	map01200	Carbon metabolism	1			Acidimicrobiales	map05132	Salmonella infection	1
Alteromonadales	map03010	Ribosome	1			Acidimicrobiales	map05134	Legionellosis	1
Atheliales	map02020	Two-component system	2			Agaricales	map00010	Glycolysis / Gluconeogenesis	1
Atheliales	map02040	Flagellar assembly	2			Agaricales	map00020	Citrate cycle (TCA cycle)	1
Atheliales	map04621	NOD-like receptor signaling pathway	2			Agaricales	map00620	Pyruvate metabolism	1
Atheliales	map04626	Plant-pathogen interaction	2			Agaricales	map00650	Butanoate metabolism	1
Atheliales	map05132	Salmonella infection	2			Agaricales	map00720	Carbon fixation pathways in prokaryotes	1
Atheliales	map05134	Legionellosis	2			Agaricales	map01100	Metabolic pathways	1
Bacillales	map00071	Fatty acid degradation	2			Agaricales	map01120	Microbial metabolism in diverse environments	1
Bacillales	map00072		2			Agaricales	map01130		1
Bacillales	map00220	Arginine biosynthesis	1			Agaricales	map01200	Carbon metabolism	1
Bacillales	map00250	Alanine, aspartate and glutamate metabolism	1			Alteromonadales	map02020	Two-component system	1
Bacillales	map00280	Valine, leucine and isoleucine degradation	2			Alteromonadales	map02040	Flagellar assembly	2
Bacillales	map00310	Lysine degradation	2			Alteromonadales	map04621	NOD-like receptor signaling pathway	1
Bacillales	map00362	Benzoate degradation	2			Alteromonadales	map04626	Plant-pathogen interaction	1
Bacillales	map00380	Tryptophan metabolism	2			Alteromonadales	map05132	Salmonella infection	1
Bacillales	map00471		1			Alteromonadales	map05134	Legionellosis	1
Bacillales	map00562	Inositol phosphate metabolism	2			Anaerolineales	map00270	Cysteine and methionine metabolism	3
Bacillales	map00620	Pyruvate metabolism	2			Anaerolineales	map00280	Valine, leucine and isoleucine degradation	3
Bacillales	map00630	Glyoxylate and dicarboxylate metabolism	2			Anaerolineales	map00290	Valine, leucine and isoleucine biosynthesis	3
Bacillales	map00640	Propanoate metabolism	2			Anaerolineales	map00770	Pantothenate and CoA biosynthesis	3
Bacillales	map00650	Butanoate metabolism	2			Anaerolineales	map00790	Folate biosynthesis	3
Bacillales	map00670	One carbon pool by folate	1			Anaerolineales	map01100	Metabolic pathways	3
Bacillales	map00720	Carbon fixation pathways in prokaryotes	3			Anaerolineales	map01110	Biosynthesis of secondary metabolites	3
Bacillales	map00900	Terpenoid backbone biosynthesis	2			Anaerolineales	map01130		3
Bacillales	map00910	Nitrogen metabolism	1			Anaerolineales	map01210	2-Oxocarboxylic acid metabolism	3
Bacillales	map01100	Metabolic pathways	4			Anaerolineales	map01230	Biosynthesis of amino acids	3
Bacillales	map01110	Biosynthesis of secondary metabolites	2			Artiodactyla	map00680	Methane metabolism	1
Bacillales	map01120	Microbial metabolism in diverse environments	5			Artiodactyla	map00720	Carbon fixation pathways in prokaryotes	1
Bacillales	map01130		2			Artiodactyla	map01120	Microbial metabolism in diverse environments	1
Bacillales	map01200	Carbon metabolism	4			Artiodactyla	map01200	Carbon metabolism	1
Bacillales	map01212	Fatty acid metabolism	2			Atheliales	map02020	Two-component system	2
Bacillales	map02010	ABC transporters	3			Atheliales	map02040	Flagellar assembly	2
Bacillales	map02020	Two-component system	6			Atheliales	map04621	NOD-like receptor signaling pathway	2
Bacillales	map02040	Flagellar assembly	4			Atheliales	map04626	Plant-pathogen interaction	2
Bacillales	map03010	Ribosome	6			Atheliales	map05132	Salmonella infection	2
Bacillales	map04217	Necroptosis	1			Atheliales	map05134	Legionellosis	2
Bacillales	map04621	NOD-like receptor signaling pathway	4			Bacillales	map00030	Pentose phosphate pathway	3
Bacillales	map04626	Plant-pathogen interaction	4			Bacillales	map00040	Pentose and glucuronate interconversions	1
Bacillales	map04964	Proximal tubule bicarbonate reclamation	1			Bacillales	map00071	Fatty acid degradation	2
Bacillales	map05132	Salmonella infection	4			Bacillales	map00072		2
Bacillales	map05134	Legionellosis	4			Bacillales	map00220	Arginine biosynthesis	2
Bacteriovoracales	map02020	Two-component system	3			Bacillales	map00250	Alanine, aspartate and glutamate metabolism	2
Bacteriovoracales	map02040	Flagellar assembly	3			Bacillales	map00280	Valine, leucine and isoleucine degradation	2
Bacteriovoracales	map04621	NOD-like receptor signaling pathway	3			Bacillales	map00310	Lysine degradation	2
Bacteriovoracales	map04626	Plant-pathogen interaction	3			Bacillales	map00362	Benzoate degradation	2
Bacteriovoracales	map05132	Salmonella infection	3			Bacillales	map00380	Tryptophan metabolism	2
Bacteriovoracales	map05134	Legionellosis	3			Bacillales	map00471		2
Bacteroidales	map00010	Glycolysis / Gluconeogenesis	112			Bacillales	map00511	Other glycan degradation	1
Bacteroidales	map00020	Citrate cycle (TCA cycle)	67			Bacillales	map00520	Amino sugar and nucleotide sugar metabolism	1
Bacteroidales	map00030	Pentose phosphate pathway	3			Bacillales	map00531	Glycosaminoglycan degradation	1
Bacteroidales	map00040	Pentose and glucuronate interconversions	18			Bacillales	map00550	Peptidoglycan biosynthesis	1
Bacteroidales	map00051	Fructose and mannose metabolism	26			Bacillales	map00620	Pyruvate metabolism	2
Bacteroidales	map00052	Galactose metabolism	1			Bacillales	map00630	Glyoxylate and dicarboxylate metabolism	2
Bacteroidales	map00190	Oxidative phosphorylation	25			Bacillales	map00640	Propanoate metabolism	2
Bacteroidales	map00220	Arginine biosynthesis	24			Bacillales	map00650	Butanoate metabolism	2
Bacteroidales	map00230	Purine metabolism	2			Bacillales	map00710	Carbon fixation in photosynthetic organisms	3
Bacteroidales	map00240	Pyrimidine metabolism	1			Bacillales	map00720	Carbon fixation pathways in prokaryotes	2
Bacteroidales	map00250	Alanine, aspartate and glutamate metabolism	24			Bacillales	map00900	Terpenoid backbone biosynthesis	2
Bacteroidales	map00260	Glycine, serine and threonine metabolism	14			Bacillales	map00910	Nitrogen metabolism	2
Bacteroidales	map00270	Cysteine and methionine metabolism	4			Bacillales	map01051	Biosynthesis of ansamycins	3
Bacteroidales	map00290	Valine, leucine and isoleucine biosynthesis	1			Bacillales	map01100	Metabolic pathways	10
Bacteroidales	map00430	Taurine and hypotaurine metabolism	1			Bacillales	map01110	Biosynthesis of secondary metabolites	5
Bacteroidales	map00480	Glutathione metabolism	1			Bacillales	map01120	Microbial metabolism in diverse environments	5
Bacteroidales	map00500	Starch and sucrose metabolism	8			Bacillales	map01130		5
Bacteroidales	map00520	Amino sugar and nucleotide sugar metabolism	1			Bacillales	map01200	Carbon metabolism	7
Bacteroidales	map00521	Streptomycin biosynthesis	3			Bacillales	map01212	Fatty acid metabolism	2
Bacteroidales	map00562	Inositol phosphate metabolism	11			Bacillales	map01230	Biosynthesis of amino acids	3
Bacteroidales	map00620	Pyruvate metabolism	76			Bacillales	map01502	Vancomycin resistance	1
Bacteroidales	map00623	Toluene degradation	6			Bacillales	map02010	ABC transporters	5
Bacteroidales	map00627	Aminobenzoate degradation	1			Bacillales	map02020	Two-component system	12
Bacteroidales	map00630	Glyoxylate and dicarboxylate metabolism	4			Bacillales	map02040	Flagellar assembly	9
Bacteroidales	map00640	Propanoate metabolism	1			Bacillales	map03010	Ribosome	2
Bacteroidales	map00650	Butanoate metabolism	47			Bacillales	map04217	Necroptosis	2
Bacteroidales	map00660	C5-Branched dibasic acid metabolism	1			Bacillales	map04621	NOD-like receptor signaling pathway	9
Bacteroidales	map00680	Methane metabolism	46			Bacillales	map04626	Plant-pathogen interaction	9
Bacteroidales	map00710	Carbon fixation in photosynthetic organisms	93			Bacillales	map04964	Proximal tubule bicarbonate reclamation	2
Bacteroidales	map00720	Carbon fixation pathways in prokaryotes	84			Bacillales	map05100	Bacterial invasion of epithelial cells	1
Bacteroidales	map00750	Vitamin B6 metabolism	6			Bacillales	map05132	Salmonella infection	9
Bacteroidales	map00770	Pantothenate and CoA biosynthesis	1			Bacillales	map05134	Legionellosis	9
Bacteroidales	map00910	Nitrogen metabolism	26			Bacteroidales	map00010	Glycolysis / Gluconeogenesis	107
Bacteroidales	map01051	Biosynthesis of ansamycins	1			Bacteroidales	map00020	Citrate cycle (TCA cycle)	61
Bacteroidales	map01100	Metabolic pathways	240			Bacteroidales	map00030	Pentose phosphate pathway	12
Bacteroidales	map01110	Biosynthesis of secondary metabolites	128			Bacteroidales	map00040	Pentose and glucuronate interconversions	23
Bacteroidales	map01120	Microbial metabolism in diverse environments	194			Bacteroidales	map00051	Fructose and mannose metabolism	37
Bacteroidales	map01130		151			Bacteroidales	map00052	Galactose metabolism	4
Bacteroidales	map01200	Carbon metabolism	181			Bacteroidales	map00061	Fatty acid biosynthesis	3
Bacteroidales	map01210	2-Oxocarboxylic acid metabolism	1			Bacteroidales	map00120	Primary bile acid biosynthesis	1
Bacteroidales	map01220	Degradation of aromatic compounds	6			Bacteroidales	map00121	Secondary bile acid biosynthesis	1
Bacteroidales	map01230	Biosynthesis of amino acids	81			Bacteroidales	map00190	Oxidative phosphorylation	19
Bacteroidales	map02024	Quorum sensing	1			Bacteroidales	map00220	Arginine biosynthesis	29
Bacteroidales	map02026	Biofilm formation - Escherichia coli	6			Bacteroidales	map00230	Purine metabolism	27
Bacteroidales	map03010	Ribosome	249			Bacteroidales	map00240	Pyrimidine metabolism	27
Bacteroidales	map03018	RNA degradation	41			Bacteroidales	map00250	Alanine, aspartate and glutamate metabolism	32
Bacteroidales	map03020	RNA polymerase	1			Bacteroidales	map00260	Glycine, serine and threonine metabolism	20
Bacteroidales	map03060	Protein export	1			Bacteroidales	map00270	Cysteine and methionine metabolism	8
Bacteroidales	map03070	Bacterial secretion system	1			Bacteroidales	map00290	Valine, leucine and isoleucine biosynthesis	4
Bacteroidales	map04013	MAPK signaling pathway - fly	1			Bacteroidales	map00330	Arginine and proline metabolism	1
Bacteroidales	map04066	HIF-1 signaling pathway	60			Bacteroidales	map00333	Prodigiosin biosynthesis	2
Bacteroidales	map04068	FoxO signaling pathway	1			Bacteroidales	map00350	Tyrosine metabolism	1
Bacteroidales	map04146	Peroxisome	1			Bacteroidales	map00360	Phenylalanine metabolism	1
Bacteroidales	map04211	Longevity regulating pathway	1			Bacteroidales	map00400	Phenylalanine, tyrosine and tryptophan biosynthesis	1
Bacteroidales	map04212	Longevity regulating pathway - worm	7			Bacteroidales	map00401	Novobiocin biosynthesis	1
Bacteroidales	map04213	Longevity regulating pathway - multiple species	4			Bacteroidales	map00410	beta-Alanine metabolism	3
Bacteroidales	map04217	Necroptosis	6			Bacteroidales	map00430	Taurine and hypotaurine metabolism	6
Bacteroidales	map04910	Insulin signaling pathway	6			Bacteroidales	map00460	Cyanoamino acid metabolism	5
Bacteroidales	map04922	Glucagon signaling pathway	6			Bacteroidales	map00480	Glutathione metabolism	1
Bacteroidales	map04931	Insulin resistance	6			Bacteroidales	map00500	Starch and sucrose metabolism	21
Bacteroidales	map04940	Type I diabetes mellitus	6			Bacteroidales	map00520	Amino sugar and nucleotide sugar metabolism	4
Bacteroidales	map05010	Alzheimer disease	25			Bacteroidales	map00521	Streptomycin biosynthesis	10
Bacteroidales	map05016	Huntington disease	1			Bacteroidales	map00524	Neomycin, kanamycin and gentamicin biosynthesis	1
Bacteroidales	map05134	Legionellosis	13			Bacteroidales	map00562	Inositol phosphate metabolism	20
Bacteroidales	map05152	Tuberculosis	6			Bacteroidales	map00600	Sphingolipid metabolism	3
Blastocatellales	map03018	RNA degradation	1			Bacteroidales	map00620	Pyruvate metabolism	83
Blastocatellales	map04212	Longevity regulating pathway - worm	1			Bacteroidales	map00623	Toluene degradation	1
Blastocatellales	map05152	Tuberculosis	1			Bacteroidales	map00627	Aminobenzoate degradation	4
Brachyspirales	map00561	Glycerolipid metabolism	1			Bacteroidales	map00630	Glyoxylate and dicarboxylate metabolism	9
Brachyspirales	map00640	Propanoate metabolism	1			Bacteroidales	map00640	Propanoate metabolism	3
Burkholderiales	map02020	Two-component system	1			Bacteroidales	map00650	Butanoate metabolism	58
Burkholderiales	map02040	Flagellar assembly	1			Bacteroidales	map00660	C5-Branched dibasic acid metabolism	4
Burkholderiales	map04621	NOD-like receptor signaling pathway	1			Bacteroidales	map00670	One carbon pool by folate	2
Burkholderiales	map04626	Plant-pathogen interaction	1			Bacteroidales	map00680	Methane metabolism	61
Burkholderiales	map05132	Salmonella infection	1			Bacteroidales	map00710	Carbon fixation in photosynthetic organisms	84
Burkholderiales	map05134	Legionellosis	1			Bacteroidales	map00720	Carbon fixation pathways in prokaryotes	96
Cardiobacteriales	map00010	Glycolysis / Gluconeogenesis	1			Bacteroidales	map00750	Vitamin B6 metabolism	14
Cardiobacteriales	map00710	Carbon fixation in photosynthetic organisms	1			Bacteroidales	map00760	Nicotinate and nicotinamide metabolism	1
Cardiobacteriales	map01100	Metabolic pathways	1			Bacteroidales	map00770	Pantothenate and CoA biosynthesis	4
Cardiobacteriales	map01110	Biosynthesis of secondary metabolites	1			Bacteroidales	map00780	Biotin metabolism	3
Cardiobacteriales	map01120	Microbial metabolism in diverse environments	1			Bacteroidales	map00790	Folate biosynthesis	1
Cardiobacteriales	map01130		1			Bacteroidales	map00910	Nitrogen metabolism	30
Cardiobacteriales	map01200	Carbon metabolism	1			Bacteroidales	map00940	Phenylpropanoid biosynthesis	4
Cardiobacteriales	map01230	Biosynthesis of amino acids	1			Bacteroidales	map00950	Isoquinoline alkaloid biosynthesis	1
Cardiobacteriales	map04066	HIF-1 signaling pathway	1			Bacteroidales	map00960	Tropane, piperidine and pyridine alkaloid biosynthesis	1
Cardiobacteriales	map05010	Alzheimer disease	1			Bacteroidales	map00970	Aminoacyl-tRNA biosynthesis	3
Chitinispirillales	map00010	Glycolysis / Gluconeogenesis	1			Bacteroidales	map01040	Biosynthesis of unsaturated fatty acids	2
Chitinispirillales	map00710	Carbon fixation in photosynthetic organisms	1			Bacteroidales	map01051	Biosynthesis of ansamycins	2
Chitinispirillales	map01100	Metabolic pathways	1			Bacteroidales	map01100	Metabolic pathways	304
Chitinispirillales	map01110	Biosynthesis of secondary metabolites	1			Bacteroidales	map01110	Biosynthesis of secondary metabolites	131
Chitinispirillales	map01120	Microbial metabolism in diverse environments	1			Bacteroidales	map01120	Microbial metabolism in diverse environments	206
Chitinispirillales	map01130		1			Bacteroidales	map01130		167
Chitinispirillales	map01200	Carbon metabolism	1			Bacteroidales	map01200	Carbon metabolism	189
Chitinispirillales	map01230	Biosynthesis of amino acids	1			Bacteroidales	map01210	2-Oxocarboxylic acid metabolism	5
Chitinispirillales	map04066	HIF-1 signaling pathway	1			Bacteroidales	map01212	Fatty acid metabolism	3
Chitinispirillales	map05010	Alzheimer disease	1			Bacteroidales	map01220	Degradation of aromatic compounds	1
Chromatiales	map03010	Ribosome	1			Bacteroidales	map01230	Biosynthesis of amino acids	86
Clostridiales	map00010	Glycolysis / Gluconeogenesis	1544			Bacteroidales	map01501	beta-Lactam resistance	1
Clostridiales	map00020	Citrate cycle (TCA cycle)	853			Bacteroidales	map01503	Cationic antimicrobial peptide (CAMP) resistance	1
Clostridiales	map00030	Pentose phosphate pathway	322			Bacteroidales	map01523	Antifolate resistance	2
Clostridiales	map00040	Pentose and glucuronate interconversions	98			Bacteroidales	map02010	ABC transporters	1
Clostridiales	map00051	Fructose and mannose metabolism	482			Bacteroidales	map02020	Two-component system	1
Clostridiales	map00052	Galactose metabolism	189			Bacteroidales	map02024	Quorum sensing	6
Clostridiales	map00053	Ascorbate and aldarate metabolism	17			Bacteroidales	map02026	Biofilm formation - Escherichia coli	12
Clostridiales	map00061	Fatty acid biosynthesis	7			Bacteroidales	map02030	Bacterial chemotaxis	1
Clostridiales	map00071	Fatty acid degradation	217			Bacteroidales	map02040	Flagellar assembly	1
Clostridiales	map00072		100			Bacteroidales	map03010	Ribosome	299
Clostridiales	map00190	Oxidative phosphorylation	135			Bacteroidales	map03018	RNA degradation	52
Clostridiales	map00195	Photosynthesis	32			Bacteroidales	map03020	RNA polymerase	17
Clostridiales	map00220	Arginine biosynthesis	56			Bacteroidales	map03030	DNA replication	1
Clostridiales	map00230	Purine metabolism	107			Bacteroidales	map03060	Protein export	3
Clostridiales	map00240	Pyrimidine metabolism	57			Bacteroidales	map03070	Bacterial secretion system	4
Clostridiales	map00250	Alanine, aspartate and glutamate metabolism	100			Bacteroidales	map03430	Mismatch repair	1
Clostridiales	map00260	Glycine, serine and threonine metabolism	44			Bacteroidales	map03440	Homologous recombination	1
Clostridiales	map00261	Monobactam biosynthesis	8			Bacteroidales	map04013	MAPK signaling pathway - fly	1
Clostridiales	map00270	Cysteine and methionine metabolism	18			Bacteroidales	map04066	HIF-1 signaling pathway	40
Clostridiales	map00280	Valine, leucine and isoleucine degradation	206			Bacteroidales	map04068	FoxO signaling pathway	1
Clostridiales	map00290	Valine, leucine and isoleucine biosynthesis	81			Bacteroidales	map04071	Sphingolipid signaling pathway	3
Clostridiales	map00300	Lysine biosynthesis	10			Bacteroidales	map04146	Peroxisome	1
Clostridiales	map00310	Lysine degradation	107			Bacteroidales	map04211	Longevity regulating pathway	1
Clostridiales	map00330	Arginine and proline metabolism	10			Bacteroidales	map04212	Longevity regulating pathway - worm	13
Clostridiales	map00340	Histidine metabolism	2			Bacteroidales	map04213	Longevity regulating pathway - multiple species	2
Clostridiales	map00350	Tyrosine metabolism	14			Bacteroidales	map04217	Necroptosis	12
Clostridiales	map00360	Phenylalanine metabolism	49			Bacteroidales	map04626	Plant-pathogen interaction	1
Clostridiales	map00362	Benzoate degradation	171			Bacteroidales	map04727	GABAergic synapse	3
Clostridiales	map00380	Tryptophan metabolism	101			Bacteroidales	map04910	Insulin signaling pathway	12
Clostridiales	map00400	Phenylalanine, tyrosine and tryptophan biosynthesis	2			Bacteroidales	map04922	Glucagon signaling pathway	12
Clostridiales	map00430	Taurine and hypotaurine metabolism	47			Bacteroidales	map04931	Insulin resistance	12
Clostridiales	map00450	Selenocompound metabolism	4			Bacteroidales	map04940	Type I diabetes mellitus	13
Clostridiales	map00460	Cyanoamino acid metabolism	16			Bacteroidales	map05010	Alzheimer disease	8
Clostridiales	map00471		50			Bacteroidales	map05016	Huntington disease	1
Clostridiales	map00480	Glutathione metabolism	32			Bacteroidales	map05133	Pertussis	1
Clostridiales	map00500	Starch and sucrose metabolism	308			Bacteroidales	map05134	Legionellosis	22
Clostridiales	map00511	Other glycan degradation	17			Bacteroidales	map05152	Tuberculosis	12
Clostridiales	map00520	Amino sugar and nucleotide sugar metabolism	225			Blastocatellales	map03018	RNA degradation	1
Clostridiales	map00521	Streptomycin biosynthesis	37			Blastocatellales	map04212	Longevity regulating pathway - worm	1
Clostridiales	map00523	Polyketide sugar unit biosynthesis	6			Blastocatellales	map05152	Tuberculosis	1
Clostridiales	map00524	Neomycin, kanamycin and gentamicin biosynthesis	1			Brachyspirales	map00561	Glycerolipid metabolism	1
Clostridiales	map00561	Glycerolipid metabolism	23			Brachyspirales	map00640	Propanoate metabolism	1
Clostridiales	map00562	Inositol phosphate metabolism	243			Burkholderiales	map00620	Pyruvate metabolism	1
Clostridiales	map00564	Glycerophospholipid metabolism	6			Burkholderiales	map00623	Toluene degradation	1
Clostridiales	map00600	Sphingolipid metabolism	12			Burkholderiales	map00640	Propanoate metabolism	1
Clostridiales	map00603	Glycosphingolipid biosynthesis - globo and isoglobo series	1			Burkholderiales	map00650	Butanoate metabolism	1
Clostridiales	map00620	Pyruvate metabolism	1627			Burkholderiales	map00670	One carbon pool by folate	1
Clostridiales	map00625	Chloroalkane and chloroalkene degradation	13			Burkholderiales	map00720	Carbon fixation pathways in prokaryotes	2
Clostridiales	map00626	Naphthalene degradation	13			Burkholderiales	map01100	Metabolic pathways	3
Clostridiales	map00630	Glyoxylate and dicarboxylate metabolism	156			Burkholderiales	map01120	Microbial metabolism in diverse environments	4
Clostridiales	map00633	Nitrotoluene degradation	5			Burkholderiales	map01200	Carbon metabolism	2
Clostridiales	map00640	Propanoate metabolism	577			Burkholderiales	map01220	Degradation of aromatic compounds	1
Clostridiales	map00643	Styrene degradation	41			Burkholderiales	map02020	Two-component system	5
Clostridiales	map00650	Butanoate metabolism	996			Burkholderiales	map02030	Bacterial chemotaxis	1
Clostridiales	map00670	One carbon pool by folate	10			Burkholderiales	map02040	Flagellar assembly	4
Clostridiales	map00680	Methane metabolism	249			Burkholderiales	map03010	Ribosome	1
Clostridiales	map00710	Carbon fixation in photosynthetic organisms	1305			Burkholderiales	map04621	NOD-like receptor signaling pathway	4
Clostridiales	map00720	Carbon fixation pathways in prokaryotes	554			Burkholderiales	map04626	Plant-pathogen interaction	4
Clostridiales	map00730	Thiamine metabolism	16			Burkholderiales	map05132	Salmonella infection	4
Clostridiales	map00750	Vitamin B6 metabolism	2			Burkholderiales	map05134	Legionellosis	4
Clostridiales	map00760	Nicotinate and nicotinamide metabolism	6			Campylobacterales	map00010	Glycolysis / Gluconeogenesis	1
Clostridiales	map00770	Pantothenate and CoA biosynthesis	81			Campylobacterales	map00020	Citrate cycle (TCA cycle)	1
Clostridiales	map00780	Biotin metabolism	3			Campylobacterales	map00500	Starch and sucrose metabolism	1
Clostridiales	map00790	Folate biosynthesis	5			Campylobacterales	map00620	Pyruvate metabolism	1
Clostridiales	map00900	Terpenoid backbone biosynthesis	163			Campylobacterales	map00650	Butanoate metabolism	1
Clostridiales	map00910	Nitrogen metabolism	98			Campylobacterales	map00720	Carbon fixation pathways in prokaryotes	1
Clostridiales	map00920	Sulfur metabolism	13			Campylobacterales	map01100	Metabolic pathways	2
Clostridiales	map00940	Phenylpropanoid biosynthesis	7			Campylobacterales	map01120	Microbial metabolism in diverse environments	1
Clostridiales	map00970	Aminoacyl-tRNA biosynthesis	6			Campylobacterales	map01130		1
Clostridiales	map00983	Drug metabolism - other enzymes	1			Campylobacterales	map01200	Carbon metabolism	1
Clostridiales	map01051	Biosynthesis of ansamycins	28			Campylobacterales	map03010	Ribosome	1
Clostridiales	map01100	Metabolic pathways	3554			Campylobacterales	map03018	RNA degradation	1
Clostridiales	map01110	Biosynthesis of secondary metabolites	2092			Campylobacterales	map04212	Longevity regulating pathway - worm	1
Clostridiales	map01120	Microbial metabolism in diverse environments	2720			Campylobacterales	map04940	Type I diabetes mellitus	1
Clostridiales	map01130		1960			Campylobacterales	map05134	Legionellosis	1
Clostridiales	map01200	Carbon metabolism	2049			Campylobacterales	map05152	Tuberculosis	1
Clostridiales	map01210	2-Oxocarboxylic acid metabolism	121			Cardiobacteriales	map00010	Glycolysis / Gluconeogenesis	1
Clostridiales	map01212	Fatty acid metabolism	207			Cardiobacteriales	map00051	Fructose and mannose metabolism	1
Clostridiales	map01220	Degradation of aromatic compounds	35			Cardiobacteriales	map00562	Inositol phosphate metabolism	1
Clostridiales	map01230	Biosynthesis of amino acids	732			Cardiobacteriales	map00710	Carbon fixation in photosynthetic organisms	1
Clostridiales	map01501	beta-Lactam resistance	34			Cardiobacteriales	map01100	Metabolic pathways	1
Clostridiales	map01523	Antifolate resistance	3			Cardiobacteriales	map01110	Biosynthesis of secondary metabolites	1
Clostridiales	map02010	ABC transporters	506			Cardiobacteriales	map01120	Microbial metabolism in diverse environments	1
Clostridiales	map02020	Two-component system	673			Cardiobacteriales	map01130		1
Clostridiales	map02024	Quorum sensing	100			Cardiobacteriales	map01200	Carbon metabolism	1
Clostridiales	map02026	Biofilm formation - Escherichia coli	193			Cardiobacteriales	map01230	Biosynthesis of amino acids	1
Clostridiales	map02030	Bacterial chemotaxis	220			Caudovirales	map00920	Sulfur metabolism	2
Clostridiales	map02040	Flagellar assembly	482			Caudovirales	map01120	Microbial metabolism in diverse environments	2
Clostridiales	map02060	Phosphotransferase system (PTS)	13			Caulobacterales	map03010	Ribosome	4
Clostridiales	map03010	Ribosome	853			Chitinispirillales	map00010	Glycolysis / Gluconeogenesis	1
Clostridiales	map03018	RNA degradation	188			Chitinispirillales	map00710	Carbon fixation in photosynthetic organisms	1
Clostridiales	map03020	RNA polymerase	46			Chitinispirillales	map01100	Metabolic pathways	1
Clostridiales	map03030	DNA replication	19			Chitinispirillales	map01110	Biosynthesis of secondary metabolites	1
Clostridiales	map03060	Protein export	1			Chitinispirillales	map01120	Microbial metabolism in diverse environments	1
Clostridiales	map03070	Bacterial secretion system	1			Chitinispirillales	map01130		1
Clostridiales	map03320	PPAR signaling pathway	31			Chitinispirillales	map01200	Carbon metabolism	1
Clostridiales	map03430	Mismatch repair	19			Chitinispirillales	map01230	Biosynthesis of amino acids	1
Clostridiales	map03440	Homologous recombination	19			Chitinispirillales	map04066	HIF-1 signaling pathway	1
Clostridiales	map04066	HIF-1 signaling pathway	227			Chitinispirillales	map05010	Alzheimer disease	1
Clostridiales	map04068	FoxO signaling pathway	15			Chlamydiales	map00010	Glycolysis / Gluconeogenesis	1
Clostridiales	map04112	Cell cycle - Caulobacter	6			Chlamydiales	map00260	Glycine, serine and threonine metabolism	1
Clostridiales	map04141	Protein processing in endoplasmic reticulum	10			Chlamydiales	map00680	Methane metabolism	1
Clostridiales	map04142	Lysosome	6			Chlamydiales	map01100	Metabolic pathways	1
Clostridiales	map04146	Peroxisome	29			Chlamydiales	map01110	Biosynthesis of secondary metabolites	1
Clostridiales	map04151	PI3K-Akt signaling pathway	25			Chlamydiales	map01120	Microbial metabolism in diverse environments	1
Clostridiales	map04152	AMPK signaling pathway	20			Chlamydiales	map01130		1
Clostridiales	map04212	Longevity regulating pathway - worm	174			Chlamydiales	map01200	Carbon metabolism	1
Clostridiales	map04216	Ferroptosis	4			Chlamydiales	map01230	Biosynthesis of amino acids	1
Clostridiales	map04217	Necroptosis	114			Chlamydomonadales	map02020	Two-component system	2
Clostridiales	map04612	Antigen processing and presentation	10			Chlamydomonadales	map02040	Flagellar assembly	2
Clostridiales	map04621	NOD-like receptor signaling pathway	475			Chlamydomonadales	map04621	NOD-like receptor signaling pathway	2
Clostridiales	map04626	Plant-pathogen interaction	487			Chlamydomonadales	map04626	Plant-pathogen interaction	2
Clostridiales	map04657	IL-17 signaling pathway	10			Chlamydomonadales	map05132	Salmonella infection	2
Clostridiales	map04659	Th17 cell differentiation	10			Chlamydomonadales	map05134	Legionellosis	2
Clostridiales	map04714	Thermogenesis	4			Chromatiales	map03010	Ribosome	1
Clostridiales	map04910	Insulin signaling pathway	69			Clostridiales	map00010	Glycolysis / Gluconeogenesis	1214
Clostridiales	map04914	Progesterone-mediated oocyte maturation	10			Clostridiales	map00020	Citrate cycle (TCA cycle)	629
Clostridiales	map04915	Estrogen signaling pathway	10			Clostridiales	map00030	Pentose phosphate pathway	311
Clostridiales	map04917	Prolactin signaling pathway	1			Clostridiales	map00040	Pentose and glucuronate interconversions	105
Clostridiales	map04920	Adipocytokine signaling pathway	19			Clostridiales	map00051	Fructose and mannose metabolism	462
Clostridiales	map04922	Glucagon signaling pathway	72			Clostridiales	map00052	Galactose metabolism	213
Clostridiales	map04931	Insulin resistance	69			Clostridiales	map00053	Ascorbate and aldarate metabolism	18
Clostridiales	map04940	Type I diabetes mellitus	138			Clostridiales	map00061	Fatty acid biosynthesis	19
Clostridiales	map04964	Proximal tubule bicarbonate reclamation	65			Clostridiales	map00071	Fatty acid degradation	163
Clostridiales	map05010	Alzheimer disease	214			Clostridiales	map00072		55
Clostridiales	map05132	Salmonella infection	465			Clostridiales	map00121	Secondary bile acid biosynthesis	3
Clostridiales	map05134	Legionellosis	605			Clostridiales	map00190	Oxidative phosphorylation	113
Clostridiales	map05152	Tuberculosis	168			Clostridiales	map00195	Photosynthesis	36
Clostridiales	map05200	Pathways in cancer	10			Clostridiales	map00220	Arginine biosynthesis	72
Clostridiales	map05215	Prostate cancer	10			Clostridiales	map00230	Purine metabolism	189
Clostridiales	map05230	Central carbon metabolism in cancer	5			Clostridiales	map00240	Pyrimidine metabolism	88
Clostridiales	map05418	Fluid shear stress and atherosclerosis	10			Clostridiales	map00250	Alanine, aspartate and glutamate metabolism	100
Cytophagales	map00260	Glycine, serine and threonine metabolism	1			Clostridiales	map00260	Glycine, serine and threonine metabolism	64
Cytophagales	map00460	Cyanoamino acid metabolism	1			Clostridiales	map00261	Monobactam biosynthesis	20
Cytophagales	map00630	Glyoxylate and dicarboxylate metabolism	1			Clostridiales	map00270	Cysteine and methionine metabolism	38
Cytophagales	map00670	One carbon pool by folate	1			Clostridiales	map00280	Valine, leucine and isoleucine degradation	151
Cytophagales	map00680	Methane metabolism	1			Clostridiales	map00290	Valine, leucine and isoleucine biosynthesis	39
Cytophagales	map01100	Metabolic pathways	1			Clostridiales	map00300	Lysine biosynthesis	28
Cytophagales	map01110	Biosynthesis of secondary metabolites	1			Clostridiales	map00310	Lysine degradation	63
Cytophagales	map01120	Microbial metabolism in diverse environments	1			Clostridiales	map00330	Arginine and proline metabolism	29
Cytophagales	map01130		1			Clostridiales	map00333	Prodigiosin biosynthesis	8
Cytophagales	map01200	Carbon metabolism	1			Clostridiales	map00340	Histidine metabolism	3
Cytophagales	map01230	Biosynthesis of amino acids	1			Clostridiales	map00350	Tyrosine metabolism	19
Cytophagales	map01523	Antifolate resistance	1			Clostridiales	map00360	Phenylalanine metabolism	61
Cytophagales	map02010	ABC transporters	1			Clostridiales	map00362	Benzoate degradation	144
Cytophagales	map02020	Two-component system	1			Clostridiales	map00380	Tryptophan metabolism	57
Cytophagales	map02040	Flagellar assembly	1			Clostridiales	map00400	Phenylalanine, tyrosine and tryptophan biosynthesis	13
Cytophagales	map04621	NOD-like receptor signaling pathway	1			Clostridiales	map00430	Taurine and hypotaurine metabolism	48
Cytophagales	map04626	Plant-pathogen interaction	1			Clostridiales	map00450	Selenocompound metabolism	3
Cytophagales	map05132	Salmonella infection	1			Clostridiales	map00460	Cyanoamino acid metabolism	30
Cytophagales	map05134	Legionellosis	1			Clostridiales	map00471		52
Deferribacterales	map00010	Glycolysis / Gluconeogenesis	7			Clostridiales	map00472		5
Deferribacterales	map00020	Citrate cycle (TCA cycle)	6			Clostridiales	map00473		3
Deferribacterales	map00051	Fructose and mannose metabolism	1			Clostridiales	map00480	Glutathione metabolism	39
Deferribacterales	map00190	Oxidative phosphorylation	3			Clostridiales	map00500	Starch and sucrose metabolism	492
Deferribacterales	map00195	Photosynthesis	1			Clostridiales	map00511	Other glycan degradation	37
Deferribacterales	map00270	Cysteine and methionine metabolism	2			Clostridiales	map00520	Amino sugar and nucleotide sugar metabolism	318
Deferribacterales	map00280	Valine, leucine and isoleucine degradation	4			Clostridiales	map00521	Streptomycin biosynthesis	74
Deferribacterales	map00380	Tryptophan metabolism	2			Clostridiales	map00523	Polyketide sugar unit biosynthesis	5
Deferribacterales	map00562	Inositol phosphate metabolism	1			Clostridiales	map00531	Glycosaminoglycan degradation	1
Deferribacterales	map00620	Pyruvate metabolism	4			Clostridiales	map00550	Peptidoglycan biosynthesis	7
Deferribacterales	map00630	Glyoxylate and dicarboxylate metabolism	20			Clostridiales	map00561	Glycerolipid metabolism	34
Deferribacterales	map00640	Propanoate metabolism	4			Clostridiales	map00562	Inositol phosphate metabolism	240
Deferribacterales	map00650	Butanoate metabolism	2			Clostridiales	map00564	Glycerophospholipid metabolism	7
Deferribacterales	map00680	Methane metabolism	14			Clostridiales	map00600	Sphingolipid metabolism	23
Deferribacterales	map00710	Carbon fixation in photosynthetic organisms	9			Clostridiales	map00603	Glycosphingolipid biosynthesis - globo and isoglobo series	4
Deferribacterales	map00720	Carbon fixation pathways in prokaryotes	6			Clostridiales	map00620	Pyruvate metabolism	1096
Deferribacterales	map01100	Metabolic pathways	28			Clostridiales	map00625	Chloroalkane and chloroalkene degradation	19
Deferribacterales	map01110	Biosynthesis of secondary metabolites	13			Clostridiales	map00626	Naphthalene degradation	19
Deferribacterales	map01120	Microbial metabolism in diverse environments	27			Clostridiales	map00630	Glyoxylate and dicarboxylate metabolism	111
Deferribacterales	map01130		15			Clostridiales	map00633	Nitrotoluene degradation	20
Deferribacterales	map01200	Carbon metabolism	29			Clostridiales	map00640	Propanoate metabolism	300
Deferribacterales	map01230	Biosynthesis of amino acids	5			Clostridiales	map00643	Styrene degradation	49
Deferribacterales	map02010	ABC transporters	1			Clostridiales	map00650	Butanoate metabolism	624
Deferribacterales	map02020	Two-component system	10			Clostridiales	map00670	One carbon pool by folate	21
Deferribacterales	map02040	Flagellar assembly	10			Clostridiales	map00680	Methane metabolism	265
Deferribacterales	map03010	Ribosome	2			Clostridiales	map00710	Carbon fixation in photosynthetic organisms	939
Deferribacterales	map03018	RNA degradation	1			Clostridiales	map00720	Carbon fixation pathways in prokaryotes	579
Deferribacterales	map04011	MAPK signaling pathway - yeast	2			Clostridiales	map00730	Thiamine metabolism	10
Deferribacterales	map04016	MAPK signaling pathway - plant	2			Clostridiales	map00750	Vitamin B6 metabolism	12
Deferribacterales	map04066	HIF-1 signaling pathway	4			Clostridiales	map00760	Nicotinate and nicotinamide metabolism	13
Deferribacterales	map04068	FoxO signaling pathway	2			Clostridiales	map00770	Pantothenate and CoA biosynthesis	39
Deferribacterales	map04146	Peroxisome	2			Clostridiales	map00780	Biotin metabolism	11
Deferribacterales	map04211	Longevity regulating pathway	2			Clostridiales	map00790	Folate biosynthesis	13
Deferribacterales	map04212	Longevity regulating pathway - worm	3			Clostridiales	map00900	Terpenoid backbone biosynthesis	171
Deferribacterales	map04213	Longevity regulating pathway - multiple species	2			Clostridiales	map00910	Nitrogen metabolism	84
Deferribacterales	map04621	NOD-like receptor signaling pathway	10			Clostridiales	map00920	Sulfur metabolism	9
Deferribacterales	map04626	Plant-pathogen interaction	10			Clostridiales	map00940	Phenylpropanoid biosynthesis	18
Deferribacterales	map04940	Type I diabetes mellitus	1			Clostridiales	map00970	Aminoacyl-tRNA biosynthesis	18
Deferribacterales	map05010	Alzheimer disease	4			Clostridiales	map00983	Drug metabolism - other enzymes	1
Deferribacterales	map05014	Amyotrophic lateral sclerosis	2			Clostridiales	map01040	Biosynthesis of unsaturated fatty acids	6
Deferribacterales	map05132	Salmonella infection	10			Clostridiales	map01051	Biosynthesis of ansamycins	17
Deferribacterales	map05134	Legionellosis	13			Clostridiales	map01100	Metabolic pathways	3172
Deferribacterales	map05152	Tuberculosis	1			Clostridiales	map01110	Biosynthesis of secondary metabolites	1802
Desulfobacterales	map00720	Carbon fixation pathways in prokaryotes	3			Clostridiales	map01120	Microbial metabolism in diverse environments	2166
Desulfobacterales	map01120	Microbial metabolism in diverse environments	3			Clostridiales	map01130		1644
Desulfobacterales	map01200	Carbon metabolism	3			Clostridiales	map01200	Carbon metabolism	1674
Desulfovibrionales	map00010	Glycolysis / Gluconeogenesis	6			Clostridiales	map01210	2-Oxocarboxylic acid metabolism	97
Desulfovibrionales	map00020	Citrate cycle (TCA cycle)	2			Clostridiales	map01212	Fatty acid metabolism	157
Desulfovibrionales	map00030	Pentose phosphate pathway	3			Clostridiales	map01220	Degradation of aromatic compounds	47
Desulfovibrionales	map00040	Pentose and glucuronate interconversions	1			Clostridiales	map01230	Biosynthesis of amino acids	637
Desulfovibrionales	map00051	Fructose and mannose metabolism	3			Clostridiales	map01501	beta-Lactam resistance	71
Desulfovibrionales	map00052	Galactose metabolism	1			Clostridiales	map01502	Vancomycin resistance	7
Desulfovibrionales	map00230	Purine metabolism	3			Clostridiales	map01523	Antifolate resistance	7
Desulfovibrionales	map00261	Monobactam biosynthesis	3			Clostridiales	map02010	ABC transporters	573
Desulfovibrionales	map00430	Taurine and hypotaurine metabolism	6			Clostridiales	map02020	Two-component system	680
Desulfovibrionales	map00450	Selenocompound metabolism	3			Clostridiales	map02024	Quorum sensing	204
Desulfovibrionales	map00500	Starch and sucrose metabolism	1			Clostridiales	map02026	Biofilm formation - Escherichia coli	262
Desulfovibrionales	map00520	Amino sugar and nucleotide sugar metabolism	1			Clostridiales	map02030	Bacterial chemotaxis	295
Desulfovibrionales	map00620	Pyruvate metabolism	8			Clostridiales	map02040	Flagellar assembly	439
Desulfovibrionales	map00633	Nitrotoluene degradation	1			Clostridiales	map02060	Phosphotransferase system (PTS)	29
Desulfovibrionales	map00640	Propanoate metabolism	5			Clostridiales	map03010	Ribosome	775
Desulfovibrionales	map00650	Butanoate metabolism	7			Clostridiales	map03018	RNA degradation	263
Desulfovibrionales	map00680	Methane metabolism	5			Clostridiales	map03020	RNA polymerase	62
Desulfovibrionales	map00710	Carbon fixation in photosynthetic organisms	3			Clostridiales	map03030	DNA replication	18
Desulfovibrionales	map00720	Carbon fixation pathways in prokaryotes	3			Clostridiales	map03060	Protein export	2
Desulfovibrionales	map00760	Nicotinate and nicotinamide metabolism	3			Clostridiales	map03070	Bacterial secretion system	2
Desulfovibrionales	map00920	Sulfur metabolism	5			Clostridiales	map03320	PPAR signaling pathway	41
Desulfovibrionales	map01100	Metabolic pathways	22			Clostridiales	map03430	Mismatch repair	18
Desulfovibrionales	map01110	Biosynthesis of secondary metabolites	4			Clostridiales	map03440	Homologous recombination	18
Desulfovibrionales	map01120	Microbial metabolism in diverse environments	17			Clostridiales	map04066	HIF-1 signaling pathway	120
Desulfovibrionales	map01130		10			Clostridiales	map04068	FoxO signaling pathway	23
Desulfovibrionales	map01200	Carbon metabolism	7			Clostridiales	map04112	Cell cycle - Caulobacter	2
Desulfovibrionales	map01230	Biosynthesis of amino acids	4			Clostridiales	map04141	Protein processing in endoplasmic reticulum	25
Desulfovibrionales	map02010	ABC transporters	2			Clostridiales	map04142	Lysosome	7
Desulfovibrionales	map02024	Quorum sensing	2			Clostridiales	map04146	Peroxisome	36
Desulfovibrionales	map03010	Ribosome	2			Clostridiales	map04151	PI3K-Akt signaling pathway	45
Desulfovibrionales	map03018	RNA degradation	4			Clostridiales	map04152	AMPK signaling pathway	27
Desulfovibrionales	map04066	HIF-1 signaling pathway	1			Clostridiales	map04212	Longevity regulating pathway - worm	245
Desulfovibrionales	map04212	Longevity regulating pathway - worm	3			Clostridiales	map04216	Ferroptosis	6
Desulfovibrionales	map04940	Type I diabetes mellitus	3			Clostridiales	map04217	Necroptosis	156
Desulfovibrionales	map05134	Legionellosis	3			Clostridiales	map04612	Antigen processing and presentation	22
Desulfovibrionales	map05152	Tuberculosis	3			Clostridiales	map04621	NOD-like receptor signaling pathway	416
Desulfuromonadales	map02020	Two-component system	1			Clostridiales	map04626	Plant-pathogen interaction	428
Desulfuromonadales	map02040	Flagellar assembly	1			Clostridiales	map04657	IL-17 signaling pathway	22
Desulfuromonadales	map04621	NOD-like receptor signaling pathway	1			Clostridiales	map04659	Th17 cell differentiation	22
Desulfuromonadales	map04626	Plant-pathogen interaction	1			Clostridiales	map04714	Thermogenesis	6
Desulfuromonadales	map05132	Salmonella infection	1			Clostridiales	map04724	Glutamatergic synapse	9
Desulfuromonadales	map05134	Legionellosis	1			Clostridiales	map04727	GABAergic synapse	9
Diplostraca	map03010	Ribosome	3			Clostridiales	map04910	Insulin signaling pathway	96
Diptera	map02010	ABC transporters	2			Clostridiales	map04914	Progesterone-mediated oocyte maturation	22
Eggerthellales	map00260	Glycine, serine and threonine metabolism	1			Clostridiales	map04915	Estrogen signaling pathway	22
Eggerthellales	map00330	Arginine and proline metabolism	1			Clostridiales	map04917	Prolactin signaling pathway	3
Eggerthellales	map01100	Metabolic pathways	1			Clostridiales	map04920	Adipocytokine signaling pathway	29
Enterobacterales	map00051	Fructose and mannose metabolism	1			Clostridiales	map04922	Glucagon signaling pathway	112
Enterobacterales	map00190	Oxidative phosphorylation	1			Clostridiales	map04930	Type II diabetes mellitus	8
Enterobacterales	map00195	Photosynthesis	1			Clostridiales	map04931	Insulin resistance	96
Enterobacterales	map00670	One carbon pool by folate	1			Clostridiales	map04940	Type I diabetes mellitus	176
Enterobacterales	map00720	Carbon fixation pathways in prokaryotes	1			Clostridiales	map04964	Proximal tubule bicarbonate reclamation	75
Enterobacterales	map01100	Metabolic pathways	2			Clostridiales	map05010	Alzheimer disease	107
Enterobacterales	map01120	Microbial metabolism in diverse environments	2			Clostridiales	map05100	Bacterial invasion of epithelial cells	7
Enterobacterales	map01200	Carbon metabolism	1			Clostridiales	map05132	Salmonella infection	394
Entomoplasmatales	map00010	Glycolysis / Gluconeogenesis	1			Clostridiales	map05134	Legionellosis	572
Entomoplasmatales	map00710	Carbon fixation in photosynthetic organisms	1			Clostridiales	map05152	Tuberculosis	243
Entomoplasmatales	map01100	Metabolic pathways	1			Clostridiales	map05165	Human papillomavirus infection	8
Entomoplasmatales	map01110	Biosynthesis of secondary metabolites	1			Clostridiales	map05200	Pathways in cancer	22
Entomoplasmatales	map01120	Microbial metabolism in diverse environments	1			Clostridiales	map05203	Viral carcinogenesis	8
Entomoplasmatales	map01130		1			Clostridiales	map05215	Prostate cancer	22
Entomoplasmatales	map01200	Carbon metabolism	1			Clostridiales	map05230	Central carbon metabolism in cancer	12
Entomoplasmatales	map01230	Biosynthesis of amino acids	1			Clostridiales	map05418	Fluid shear stress and atherosclerosis	22
Entomoplasmatales	map04066	HIF-1 signaling pathway	1			Coriobacteriales	map00720	Carbon fixation pathways in prokaryotes	1
Entomoplasmatales	map05010	Alzheimer disease	1			Coriobacteriales	map01120	Microbial metabolism in diverse environments	1
Erysipelotrichales	map00010	Glycolysis / Gluconeogenesis	2			Coriobacteriales	map01200	Carbon metabolism	1
Erysipelotrichales	map00020	Citrate cycle (TCA cycle)	1			Coriobacteriales	map02010	ABC transporters	1
Erysipelotrichales	map00460	Cyanoamino acid metabolism	1			Corynebacteriales	map02010	ABC transporters	1
Erysipelotrichales	map00500	Starch and sucrose metabolism	1			Corynebacteriales	map02020	Two-component system	1
Erysipelotrichales	map00620	Pyruvate metabolism	1			Corynebacteriales	map02040	Flagellar assembly	1
Erysipelotrichales	map00650	Butanoate metabolism	1			Corynebacteriales	map04621	NOD-like receptor signaling pathway	1
Erysipelotrichales	map00720	Carbon fixation pathways in prokaryotes	1			Corynebacteriales	map04626	Plant-pathogen interaction	1
Erysipelotrichales	map00940	Phenylpropanoid biosynthesis	1			Corynebacteriales	map05132	Salmonella infection	1
Erysipelotrichales	map01100	Metabolic pathways	2			Corynebacteriales	map05134	Legionellosis	1
Erysipelotrichales	map01110	Biosynthesis of secondary metabolites	1			Cucurbitales	map03018	RNA degradation	1
Erysipelotrichales	map01120	Microbial metabolism in diverse environments	1			Cucurbitales	map04212	Longevity regulating pathway - worm	1
Erysipelotrichales	map01130		1			Cucurbitales	map04940	Type I diabetes mellitus	1
Erysipelotrichales	map01200	Carbon metabolism	1			Cucurbitales	map05134	Legionellosis	1
Eutreptiales	map00010	Glycolysis / Gluconeogenesis	1			Cucurbitales	map05152	Tuberculosis	1
Eutreptiales	map00710	Carbon fixation in photosynthetic organisms	1			Cypriniformes	map02010	ABC transporters	1
Eutreptiales	map01100	Metabolic pathways	1			Cytophagales	map00260	Glycine, serine and threonine metabolism	1
Eutreptiales	map01110	Biosynthesis of secondary metabolites	1			Cytophagales	map00460	Cyanoamino acid metabolism	1
Eutreptiales	map01120	Microbial metabolism in diverse environments	1			Cytophagales	map00630	Glyoxylate and dicarboxylate metabolism	1
Eutreptiales	map01130		1			Cytophagales	map00670	One carbon pool by folate	1
Eutreptiales	map01200	Carbon metabolism	1			Cytophagales	map00680	Methane metabolism	1
Eutreptiales	map01230	Biosynthesis of amino acids	1			Cytophagales	map01100	Metabolic pathways	1
Eutreptiales	map04066	HIF-1 signaling pathway	1			Cytophagales	map01110	Biosynthesis of secondary metabolites	1
Eutreptiales	map05010	Alzheimer disease	1			Cytophagales	map01120	Microbial metabolism in diverse environments	1
Flavobacteriales	map00010	Glycolysis / Gluconeogenesis	1			Cytophagales	map01130		1
Flavobacteriales	map00260	Glycine, serine and threonine metabolism	1			Cytophagales	map01200	Carbon metabolism	1
Flavobacteriales	map00460	Cyanoamino acid metabolism	1			Cytophagales	map01230	Biosynthesis of amino acids	1
Flavobacteriales	map00630	Glyoxylate and dicarboxylate metabolism	1			Cytophagales	map01523	Antifolate resistance	1
Flavobacteriales	map00670	One carbon pool by folate	1			Cytophagales	map02010	ABC transporters	1
Flavobacteriales	map00680	Methane metabolism	2			Deferribacterales	map00010	Glycolysis / Gluconeogenesis	23
Flavobacteriales	map01100	Metabolic pathways	2			Deferribacterales	map00020	Citrate cycle (TCA cycle)	16
Flavobacteriales	map01110	Biosynthesis of secondary metabolites	2			Deferribacterales	map00030	Pentose phosphate pathway	6
Flavobacteriales	map01120	Microbial metabolism in diverse environments	2			Deferribacterales	map00051	Fructose and mannose metabolism	8
Flavobacteriales	map01130		2			Deferribacterales	map00052	Galactose metabolism	2
Flavobacteriales	map01200	Carbon metabolism	2			Deferribacterales	map00061	Fatty acid biosynthesis	3
Flavobacteriales	map01230	Biosynthesis of amino acids	2			Deferribacterales	map00190	Oxidative phosphorylation	16
Flavobacteriales	map01523	Antifolate resistance	1			Deferribacterales	map00195	Photosynthesis	8
Flavobacteriales	map03018	RNA degradation	2			Deferribacterales	map00270	Cysteine and methionine metabolism	6
Flavobacteriales	map04066	HIF-1 signaling pathway	1			Deferribacterales	map00280	Valine, leucine and isoleucine degradation	11
Flavobacteriales	map04212	Longevity regulating pathway - worm	1			Deferribacterales	map00380	Tryptophan metabolism	4
Flavobacteriales	map04940	Type I diabetes mellitus	1			Deferribacterales	map00562	Inositol phosphate metabolism	2
Flavobacteriales	map05134	Legionellosis	1			Deferribacterales	map00620	Pyruvate metabolism	17
Flavobacteriales	map05152	Tuberculosis	1			Deferribacterales	map00630	Glyoxylate and dicarboxylate metabolism	37
Halanaerobiales	map00910	Nitrogen metabolism	1			Deferribacterales	map00633	Nitrotoluene degradation	8
Haplosclerida	map02020	Two-component system	2			Deferribacterales	map00640	Propanoate metabolism	14
Haplosclerida	map02040	Flagellar assembly	2			Deferribacterales	map00650	Butanoate metabolism	5
Haplosclerida	map04621	NOD-like receptor signaling pathway	2			Deferribacterales	map00680	Methane metabolism	30
Haplosclerida	map04626	Plant-pathogen interaction	2			Deferribacterales	map00710	Carbon fixation in photosynthetic organisms	23
Haplosclerida	map05132	Salmonella infection	2			Deferribacterales	map00720	Carbon fixation pathways in prokaryotes	16
Haplosclerida	map05134	Legionellosis	2			Deferribacterales	map00910	Nitrogen metabolism	5
Hymenoptera	map02020	Two-component system	1			Deferribacterales	map01100	Metabolic pathways	77
Hymenoptera	map02040	Flagellar assembly	1			Deferribacterales	map01110	Biosynthesis of secondary metabolites	39
Hymenoptera	map04621	NOD-like receptor signaling pathway	1			Deferribacterales	map01120	Microbial metabolism in diverse environments	77
Hymenoptera	map04626	Plant-pathogen interaction	1			Deferribacterales	map01130		46
Hymenoptera	map05132	Salmonella infection	1			Deferribacterales	map01200	Carbon metabolism	68
Hymenoptera	map05134	Legionellosis	1			Deferribacterales	map01212	Fatty acid metabolism	3
Ktedonobacterales	map00010	Glycolysis / Gluconeogenesis	1			Deferribacterales	map01230	Biosynthesis of amino acids	16
Ktedonobacterales	map00051	Fructose and mannose metabolism	1			Deferribacterales	map02010	ABC transporters	5
Ktedonobacterales	map00562	Inositol phosphate metabolism	1			Deferribacterales	map02020	Two-component system	37
Ktedonobacterales	map00710	Carbon fixation in photosynthetic organisms	1			Deferribacterales	map02024	Quorum sensing	3
Ktedonobacterales	map01100	Metabolic pathways	1			Deferribacterales	map02040	Flagellar assembly	34
Ktedonobacterales	map01110	Biosynthesis of secondary metabolites	1			Deferribacterales	map03010	Ribosome	4
Ktedonobacterales	map01120	Microbial metabolism in diverse environments	1			Deferribacterales	map03018	RNA degradation	15
Ktedonobacterales	map01130		1			Deferribacterales	map04011	MAPK signaling pathway - yeast	4
Ktedonobacterales	map01200	Carbon metabolism	1			Deferribacterales	map04016	MAPK signaling pathway - plant	4
Ktedonobacterales	map01230	Biosynthesis of amino acids	1			Deferribacterales	map04066	HIF-1 signaling pathway	8
Lactobacillales	map00010	Glycolysis / Gluconeogenesis	66			Deferribacterales	map04068	FoxO signaling pathway	4
Lactobacillales	map00020	Citrate cycle (TCA cycle)	1			Deferribacterales	map04146	Peroxisome	4
Lactobacillales	map00030	Pentose phosphate pathway	7			Deferribacterales	map04152	AMPK signaling pathway	2
Lactobacillales	map00051	Fructose and mannose metabolism	7			Deferribacterales	map04211	Longevity regulating pathway	4
Lactobacillales	map00230	Purine metabolism	19			Deferribacterales	map04212	Longevity regulating pathway - worm	15
Lactobacillales	map00260	Glycine, serine and threonine metabolism	2			Deferribacterales	map04213	Longevity regulating pathway - multiple species	4
Lactobacillales	map00270	Cysteine and methionine metabolism	7			Deferribacterales	map04621	NOD-like receptor signaling pathway	34
Lactobacillales	map00290	Valine, leucine and isoleucine biosynthesis	1			Deferribacterales	map04626	Plant-pathogen interaction	34
Lactobacillales	map00350	Tyrosine metabolism	1			Deferribacterales	map04940	Type I diabetes mellitus	11
Lactobacillales	map00430	Taurine and hypotaurine metabolism	6			Deferribacterales	map05010	Alzheimer disease	6
Lactobacillales	map00480	Glutathione metabolism	1			Deferribacterales	map05014	Amyotrophic lateral sclerosis	4
Lactobacillales	map00562	Inositol phosphate metabolism	7			Deferribacterales	map05132	Salmonella infection	34
Lactobacillales	map00620	Pyruvate metabolism	35			Deferribacterales	map05134	Legionellosis	50
Lactobacillales	map00630	Glyoxylate and dicarboxylate metabolism	1			Deferribacterales	map05152	Tuberculosis	11
Lactobacillales	map00640	Propanoate metabolism	14			Deferribacterales	map05230	Central carbon metabolism in cancer	2
Lactobacillales	map00650	Butanoate metabolism	3			Desulfarculales	map00620	Pyruvate metabolism	1
Lactobacillales	map00660	C5-Branched dibasic acid metabolism	1			Desulfarculales	map00710	Carbon fixation in photosynthetic organisms	1
Lactobacillales	map00680	Methane metabolism	24			Desulfarculales	map00720	Carbon fixation pathways in prokaryotes	1
Lactobacillales	map00710	Carbon fixation in photosynthetic organisms	26			Desulfarculales	map01100	Metabolic pathways	1
Lactobacillales	map00720	Carbon fixation pathways in prokaryotes	5			Desulfarculales	map01120	Microbial metabolism in diverse environments	1
Lactobacillales	map00770	Pantothenate and CoA biosynthesis	1			Desulfarculales	map01200	Carbon metabolism	1
Lactobacillales	map01100	Metabolic pathways	78			Desulfobacterales	map00010	Glycolysis / Gluconeogenesis	1
Lactobacillales	map01110	Biosynthesis of secondary metabolites	68			Desulfobacterales	map00051	Fructose and mannose metabolism	1
Lactobacillales	map01120	Microbial metabolism in diverse environments	78			Desulfobacterales	map00562	Inositol phosphate metabolism	1
Lactobacillales	map01130		68			Desulfobacterales	map00710	Carbon fixation in photosynthetic organisms	1
Lactobacillales	map01200	Carbon metabolism	65			Desulfobacterales	map00720	Carbon fixation pathways in prokaryotes	2
Lactobacillales	map01210	2-Oxocarboxylic acid metabolism	1			Desulfobacterales	map01100	Metabolic pathways	1
Lactobacillales	map01230	Biosynthesis of amino acids	59			Desulfobacterales	map01110	Biosynthesis of secondary metabolites	1
Lactobacillales	map02010	ABC transporters	19			Desulfobacterales	map01120	Microbial metabolism in diverse environments	3
Lactobacillales	map02020	Two-component system	1			Desulfobacterales	map01130		1
Lactobacillales	map02040	Flagellar assembly	1			Desulfobacterales	map01200	Carbon metabolism	3
Lactobacillales	map03010	Ribosome	17			Desulfobacterales	map01230	Biosynthesis of amino acids	1
Lactobacillales	map03018	RNA degradation	19			Desulfobacterales	map04122	Sulfur relay system	1
Lactobacillales	map04066	HIF-1 signaling pathway	30			Desulfovibrionales	map00010	Glycolysis / Gluconeogenesis	8
Lactobacillales	map04212	Longevity regulating pathway - worm	5			Desulfovibrionales	map00020	Citrate cycle (TCA cycle)	3
Lactobacillales	map04621	NOD-like receptor signaling pathway	1			Desulfovibrionales	map00030	Pentose phosphate pathway	3
Lactobacillales	map04626	Plant-pathogen interaction	1			Desulfovibrionales	map00040	Pentose and glucuronate interconversions	3
Lactobacillales	map04922	Glucagon signaling pathway	28			Desulfovibrionales	map00051	Fructose and mannose metabolism	3
Lactobacillales	map04930	Type II diabetes mellitus	19			Desulfovibrionales	map00052	Galactose metabolism	3
Lactobacillales	map04940	Type I diabetes mellitus	5			Desulfovibrionales	map00071	Fatty acid degradation	1
Lactobacillales	map05010	Alzheimer disease	16			Desulfovibrionales	map00190	Oxidative phosphorylation	3
Lactobacillales	map05132	Salmonella infection	1			Desulfovibrionales	map00195	Photosynthesis	3
Lactobacillales	map05134	Legionellosis	6			Desulfovibrionales	map00230	Purine metabolism	6
Lactobacillales	map05152	Tuberculosis	5			Desulfovibrionales	map00250	Alanine, aspartate and glutamate metabolism	1
Lactobacillales	map05165	Human papillomavirus infection	19			Desulfovibrionales	map00261	Monobactam biosynthesis	6
Lactobacillales	map05203	Viral carcinogenesis	19			Desulfovibrionales	map00350	Tyrosine metabolism	1
Lactobacillales	map05230	Central carbon metabolism in cancer	21			Desulfovibrionales	map00430	Taurine and hypotaurine metabolism	4
Leptospirales	map00310	Lysine degradation	1			Desulfovibrionales	map00450	Selenocompound metabolism	6
Methanobacteriales	map00511	Other glycan degradation	1			Desulfovibrionales	map00500	Starch and sucrose metabolism	4
Methanobacteriales	map00550	Peptidoglycan biosynthesis	1			Desulfovibrionales	map00520	Amino sugar and nucleotide sugar metabolism	3
Methanobacteriales	map01100	Metabolic pathways	1			Desulfovibrionales	map00620	Pyruvate metabolism	10
Methanobacteriales	map01502	Vancomycin resistance	1			Desulfovibrionales	map00625	Chloroalkane and chloroalkene degradation	1
Methanobacteriales	map02020	Two-component system	1			Desulfovibrionales	map00626	Naphthalene degradation	1
Methanobacteriales	map05100	Bacterial invasion of epithelial cells	1			Desulfovibrionales	map00633	Nitrotoluene degradation	1
Myxococcales	map00010	Glycolysis / Gluconeogenesis	2			Desulfovibrionales	map00640	Propanoate metabolism	4
Myxococcales	map00710	Carbon fixation in photosynthetic organisms	2			Desulfovibrionales	map00650	Butanoate metabolism	7
Myxococcales	map01100	Metabolic pathways	2			Desulfovibrionales	map00680	Methane metabolism	6
Myxococcales	map01110	Biosynthesis of secondary metabolites	2			Desulfovibrionales	map00710	Carbon fixation in photosynthetic organisms	4
Myxococcales	map01120	Microbial metabolism in diverse environments	2			Desulfovibrionales	map00720	Carbon fixation pathways in prokaryotes	6
Myxococcales	map01130		2			Desulfovibrionales	map00760	Nicotinate and nicotinamide metabolism	4
Myxococcales	map01200	Carbon metabolism	2			Desulfovibrionales	map00920	Sulfur metabolism	8
Myxococcales	map01230	Biosynthesis of amino acids	2			Desulfovibrionales	map01100	Metabolic pathways	36
Myxococcales	map03010	Ribosome	2			Desulfovibrionales	map01110	Biosynthesis of secondary metabolites	6
Myxococcales	map04066	HIF-1 signaling pathway	2			Desulfovibrionales	map01120	Microbial metabolism in diverse environments	23
Myxococcales	map05010	Alzheimer disease	2			Desulfovibrionales	map01130		17
Opisthorchiida	map00230	Purine metabolism	1			Desulfovibrionales	map01200	Carbon metabolism	10
Opisthorchiida	map00240	Pyrimidine metabolism	1			Desulfovibrionales	map01220	Degradation of aromatic compounds	1
Opisthorchiida	map00511	Other glycan degradation	1			Desulfovibrionales	map01230	Biosynthesis of amino acids	4
Opisthorchiida	map00550	Peptidoglycan biosynthesis	1			Desulfovibrionales	map02010	ABC transporters	1
Opisthorchiida	map00730	Thiamine metabolism	1			Desulfovibrionales	map02020	Two-component system	3
Opisthorchiida	map00760	Nicotinate and nicotinamide metabolism	1			Desulfovibrionales	map02024	Quorum sensing	1
Opisthorchiida	map00790	Folate biosynthesis	1			Desulfovibrionales	map02026	Biofilm formation - Escherichia coli	1
Opisthorchiida	map01100	Metabolic pathways	2			Desulfovibrionales	map02030	Bacterial chemotaxis	1
Opisthorchiida	map01110	Biosynthesis of secondary metabolites	1			Desulfovibrionales	map02040	Flagellar assembly	1
Opisthorchiida	map01502	Vancomycin resistance	1			Desulfovibrionales	map03010	Ribosome	10
Opisthorchiida	map02020	Two-component system	2			Desulfovibrionales	map03018	RNA degradation	10
Opisthorchiida	map05100	Bacterial invasion of epithelial cells	1			Desulfovibrionales	map04066	HIF-1 signaling pathway	1
Pasteurellales	map00220	Arginine biosynthesis	2			Desulfovibrionales	map04122	Sulfur relay system	1
Pasteurellales	map00250	Alanine, aspartate and glutamate metabolism	2			Desulfovibrionales	map04212	Longevity regulating pathway - worm	10
Pasteurellales	map00910	Nitrogen metabolism	2			Desulfovibrionales	map04217	Necroptosis	1
Pasteurellales	map01100	Metabolic pathways	2			Desulfovibrionales	map04621	NOD-like receptor signaling pathway	1
Pseudonocardiales	map02010	ABC transporters	1			Desulfovibrionales	map04626	Plant-pathogen interaction	1
Pucciniales	map00500	Starch and sucrose metabolism	1			Desulfovibrionales	map04910	Insulin signaling pathway	1
Pucciniales	map00520	Amino sugar and nucleotide sugar metabolism	1			Desulfovibrionales	map04922	Glucagon signaling pathway	1
Pucciniales	map01100	Metabolic pathways	1			Desulfovibrionales	map04931	Insulin resistance	1
Pucciniales	map01110	Biosynthesis of secondary metabolites	1			Desulfovibrionales	map04940	Type I diabetes mellitus	6
Pucciniales	map02026	Biofilm formation - Escherichia coli	1			Desulfovibrionales	map05010	Alzheimer disease	1
Rhizobiales	map00030	Pentose phosphate pathway	1			Desulfovibrionales	map05132	Salmonella infection	1
Rhizobiales	map00630	Glyoxylate and dicarboxylate metabolism	1			Desulfovibrionales	map05134	Legionellosis	7
Rhizobiales	map01100	Metabolic pathways	1			Desulfovibrionales	map05152	Tuberculosis	10
Rhizobiales	map01120	Microbial metabolism in diverse environments	1			Desulfurellales	map00010	Glycolysis / Gluconeogenesis	1
Rhizobiales	map01200	Carbon metabolism	1			Desulfurellales	map00020	Citrate cycle (TCA cycle)	1
Rhodobacterales	map00220	Arginine biosynthesis	2			Desulfurellales	map00620	Pyruvate metabolism	1
Rhodobacterales	map00250	Alanine, aspartate and glutamate metabolism	2			Desulfurellales	map00650	Butanoate metabolism	1
Rhodobacterales	map00471		2			Desulfurellales	map00720	Carbon fixation pathways in prokaryotes	1
Rhodobacterales	map00910	Nitrogen metabolism	2			Desulfurellales	map01100	Metabolic pathways	1
Rhodobacterales	map01100	Metabolic pathways	2			Desulfurellales	map01120	Microbial metabolism in diverse environments	1
Rhodobacterales	map01200	Carbon metabolism	2			Desulfurellales	map01130		1
Rhodobacterales	map02020	Two-component system	1			Desulfurellales	map01200	Carbon metabolism	1
Rhodobacterales	map02024	Quorum sensing	3			Desulfuromonadales	map02020	Two-component system	2
Rhodobacterales	map02040	Flagellar assembly	1			Desulfuromonadales	map02040	Flagellar assembly	2
Rhodobacterales	map04217	Necroptosis	2			Desulfuromonadales	map04621	NOD-like receptor signaling pathway	2
Rhodobacterales	map04621	NOD-like receptor signaling pathway	1			Desulfuromonadales	map04626	Plant-pathogen interaction	2
Rhodobacterales	map04626	Plant-pathogen interaction	1			Desulfuromonadales	map05132	Salmonella infection	2
Rhodobacterales	map04964	Proximal tubule bicarbonate reclamation	2			Desulfuromonadales	map05134	Legionellosis	2
Rhodobacterales	map05132	Salmonella infection	1			Dictyosteliales	map00480	Glutathione metabolism	1
Rhodobacterales	map05134	Legionellosis	1			Dictyosteliales	map01100	Metabolic pathways	1
Rickettsiales	map00010	Glycolysis / Gluconeogenesis	1			Diplostraca	map03010	Ribosome	3
Rickettsiales	map00030	Pentose phosphate pathway	1			Diptera	map01501	beta-Lactam resistance	1
Rickettsiales	map00052	Galactose metabolism	1			Diptera	map02010	ABC transporters	1
Rickettsiales	map00230	Purine metabolism	1			Diptera	map02024	Quorum sensing	2
Rickettsiales	map00500	Starch and sucrose metabolism	1			Eggerthellales	map00010	Glycolysis / Gluconeogenesis	1
Rickettsiales	map00520	Amino sugar and nucleotide sugar metabolism	1			Eggerthellales	map00020	Citrate cycle (TCA cycle)	1
Rickettsiales	map00521	Streptomycin biosynthesis	1			Eggerthellales	map00260	Glycine, serine and threonine metabolism	1
Rickettsiales	map01100	Metabolic pathways	1			Eggerthellales	map00330	Arginine and proline metabolism	1
Rickettsiales	map01110	Biosynthesis of secondary metabolites	1			Eggerthellales	map00620	Pyruvate metabolism	1
Rickettsiales	map01120	Microbial metabolism in diverse environments	1			Eggerthellales	map00650	Butanoate metabolism	1
Rickettsiales	map01130		1			Eggerthellales	map00720	Carbon fixation pathways in prokaryotes	1
Saccharomycetales	map02020	Two-component system	3			Eggerthellales	map01100	Metabolic pathways	2
Saccharomycetales	map02040	Flagellar assembly	3			Eggerthellales	map01120	Microbial metabolism in diverse environments	1
Saccharomycetales	map04621	NOD-like receptor signaling pathway	3			Eggerthellales	map01130		1
Saccharomycetales	map04626	Plant-pathogen interaction	3			Eggerthellales	map01200	Carbon metabolism	1
Saccharomycetales	map05132	Salmonella infection	3			Enterobacterales	map00051	Fructose and mannose metabolism	1
Saccharomycetales	map05134	Legionellosis	3			Enterobacterales	map00680	Methane metabolism	1
Selenomonadales	map00020	Citrate cycle (TCA cycle)	1			Enterobacterales	map00720	Carbon fixation pathways in prokaryotes	1
Selenomonadales	map00270	Cysteine and methionine metabolism	1			Enterobacterales	map01120	Microbial metabolism in diverse environments	2
Selenomonadales	map00620	Pyruvate metabolism	7			Enterobacterales	map01200	Carbon metabolism	1
Selenomonadales	map00630	Glyoxylate and dicarboxylate metabolism	1			Enterobacterales	map02020	Two-component system	1
Selenomonadales	map00640	Propanoate metabolism	6			Enterobacterales	map02040	Flagellar assembly	1
Selenomonadales	map00650	Butanoate metabolism	6			Enterobacterales	map04621	NOD-like receptor signaling pathway	1
Selenomonadales	map00670	One carbon pool by folate	3			Enterobacterales	map04626	Plant-pathogen interaction	1
Selenomonadales	map00680	Methane metabolism	1			Enterobacterales	map05132	Salmonella infection	1
Selenomonadales	map00710	Carbon fixation in photosynthetic organisms	1			Enterobacterales	map05134	Legionellosis	1
Selenomonadales	map00720	Carbon fixation pathways in prokaryotes	4			Entomoplasmatales	map00010	Glycolysis / Gluconeogenesis	1
Selenomonadales	map01100	Metabolic pathways	10			Entomoplasmatales	map00710	Carbon fixation in photosynthetic organisms	1
Selenomonadales	map01110	Biosynthesis of secondary metabolites	1			Entomoplasmatales	map01100	Metabolic pathways	1
Selenomonadales	map01120	Microbial metabolism in diverse environments	10			Entomoplasmatales	map01110	Biosynthesis of secondary metabolites	1
Selenomonadales	map01130		1			Entomoplasmatales	map01120	Microbial metabolism in diverse environments	1
Selenomonadales	map01200	Carbon metabolism	4			Entomoplasmatales	map01130		1
Sphingobacteriales	map03010	Ribosome	4			Entomoplasmatales	map01200	Carbon metabolism	1
Sphingomonadales	map02020	Two-component system	4			Entomoplasmatales	map01230	Biosynthesis of amino acids	1
Sphingomonadales	map02040	Flagellar assembly	4			Entomoplasmatales	map04066	HIF-1 signaling pathway	1
Sphingomonadales	map04621	NOD-like receptor signaling pathway	4			Entomoplasmatales	map05010	Alzheimer disease	1
Sphingomonadales	map04626	Plant-pathogen interaction	4			Erysipelotrichales	map00010	Glycolysis / Gluconeogenesis	1
Sphingomonadales	map05132	Salmonella infection	4			Erysipelotrichales	map00020	Citrate cycle (TCA cycle)	1
Sphingomonadales	map05134	Legionellosis	4			Erysipelotrichales	map00620	Pyruvate metabolism	3
Spirochaetales	map00010	Glycolysis / Gluconeogenesis	1			Erysipelotrichales	map00710	Carbon fixation in photosynthetic organisms	3
Spirochaetales	map00680	Methane metabolism	1			Erysipelotrichales	map00720	Carbon fixation pathways in prokaryotes	2
Spirochaetales	map00720	Carbon fixation pathways in prokaryotes	2			Erysipelotrichales	map01100	Metabolic pathways	3
Spirochaetales	map01100	Metabolic pathways	1			Erysipelotrichales	map01110	Biosynthesis of secondary metabolites	1
Spirochaetales	map01110	Biosynthesis of secondary metabolites	1			Erysipelotrichales	map01120	Microbial metabolism in diverse environments	3
Spirochaetales	map01120	Microbial metabolism in diverse environments	3			Erysipelotrichales	map01130		1
Spirochaetales	map01130		1			Erysipelotrichales	map01200	Carbon metabolism	3
Spirochaetales	map01200	Carbon metabolism	3			Eutreptiales	map00010	Glycolysis / Gluconeogenesis	1
Spirochaetales	map01230	Biosynthesis of amino acids	1			Eutreptiales	map00710	Carbon fixation in photosynthetic organisms	1
Spirochaetales	map02010	ABC transporters	5			Eutreptiales	map01100	Metabolic pathways	1
Spirochaetales	map03018	RNA degradation	1			Eutreptiales	map01110	Biosynthesis of secondary metabolites	1
Spirochaetales	map04066	HIF-1 signaling pathway	1			Eutreptiales	map01120	Microbial metabolism in diverse environments	1
Syntrophobacterales	map03018	RNA degradation	1			Eutreptiales	map01130		1
Syntrophobacterales	map04212	Longevity regulating pathway - worm	1			Eutreptiales	map01200	Carbon metabolism	1
Syntrophobacterales	map04940	Type I diabetes mellitus	1			Eutreptiales	map01230	Biosynthesis of amino acids	1
Syntrophobacterales	map05134	Legionellosis	1			Eutreptiales	map04066	HIF-1 signaling pathway	1
Syntrophobacterales	map05152	Tuberculosis	1			Eutreptiales	map05010	Alzheimer disease	1
Trypanosomatida	map00010	Glycolysis / Gluconeogenesis	1			Flavobacteriales	map00010	Glycolysis / Gluconeogenesis	3
Trypanosomatida	map00710	Carbon fixation in photosynthetic organisms	1			Flavobacteriales	map00260	Glycine, serine and threonine metabolism	1
Trypanosomatida	map01100	Metabolic pathways	1			Flavobacteriales	map00460	Cyanoamino acid metabolism	1
Trypanosomatida	map01110	Biosynthesis of secondary metabolites	1			Flavobacteriales	map00500	Starch and sucrose metabolism	2
Trypanosomatida	map01120	Microbial metabolism in diverse environments	1			Flavobacteriales	map00630	Glyoxylate and dicarboxylate metabolism	1
Trypanosomatida	map01130		1			Flavobacteriales	map00670	One carbon pool by folate	1
Trypanosomatida	map01200	Carbon metabolism	1			Flavobacteriales	map00680	Methane metabolism	3
Trypanosomatida	map01230	Biosynthesis of amino acids	1			Flavobacteriales	map00710	Carbon fixation in photosynthetic organisms	1
Trypanosomatida	map04066	HIF-1 signaling pathway	1			Flavobacteriales	map01100	Metabolic pathways	6
Trypanosomatida	map05010	Alzheimer disease	1			Flavobacteriales	map01110	Biosynthesis of secondary metabolites	6
Vibrionales	map00230	Purine metabolism	1			Flavobacteriales	map01120	Microbial metabolism in diverse environments	4
Vibrionales	map00240	Pyrimidine metabolism	1			Flavobacteriales	map01130		4
Vibrionales	map00760	Nicotinate and nicotinamide metabolism	1			Flavobacteriales	map01200	Carbon metabolism	4
Vibrionales	map01100	Metabolic pathways	1			Flavobacteriales	map01230	Biosynthesis of amino acids	4
Vibrionales	map01110	Biosynthesis of secondary metabolites	1			Flavobacteriales	map01523	Antifolate resistance	1
Vibrionales	map02020	Two-component system	1			Flavobacteriales	map02010	ABC transporters	1
Vibrionales	map02040	Flagellar assembly	1			Flavobacteriales	map02020	Two-component system	1
Vibrionales	map04621	NOD-like receptor signaling pathway	1			Flavobacteriales	map02026	Biofilm formation - Escherichia coli	2
Vibrionales	map04626	Plant-pathogen interaction	1			Flavobacteriales	map02030	Bacterial chemotaxis	1
Vibrionales	map05132	Salmonella infection	1			Flavobacteriales	map02040	Flagellar assembly	1
Vibrionales	map05134	Legionellosis	1			Flavobacteriales	map03018	RNA degradation	3
Xanthomonadales	map00071	Fatty acid degradation	2			Flavobacteriales	map04066	HIF-1 signaling pathway	2
Xanthomonadales	map00072		2			Flavobacteriales	map04212	Longevity regulating pathway - worm	1
Xanthomonadales	map00280	Valine, leucine and isoleucine degradation	2			Flavobacteriales	map04217	Necroptosis	2
Xanthomonadales	map00310	Lysine degradation	2			Flavobacteriales	map04621	NOD-like receptor signaling pathway	1
Xanthomonadales	map00362	Benzoate degradation	2			Flavobacteriales	map04626	Plant-pathogen interaction	1
Xanthomonadales	map00380	Tryptophan metabolism	2			Flavobacteriales	map04910	Insulin signaling pathway	2
Xanthomonadales	map00620	Pyruvate metabolism	2			Flavobacteriales	map04922	Glucagon signaling pathway	2
Xanthomonadales	map00630	Glyoxylate and dicarboxylate metabolism	2			Flavobacteriales	map04931	Insulin resistance	2
Xanthomonadales	map00640	Propanoate metabolism	2			Flavobacteriales	map04940	Type I diabetes mellitus	1
Xanthomonadales	map00650	Butanoate metabolism	2			Flavobacteriales	map05132	Salmonella infection	1
Xanthomonadales	map00680	Methane metabolism	2			Flavobacteriales	map05134	Legionellosis	2
Xanthomonadales	map00720	Carbon fixation pathways in prokaryotes	4			Flavobacteriales	map05152	Tuberculosis	1
Xanthomonadales	map00900	Terpenoid backbone biosynthesis	2			Fusobacteriales	map00010	Glycolysis / Gluconeogenesis	1
Xanthomonadales	map01100	Metabolic pathways	2			Fusobacteriales	map00020	Citrate cycle (TCA cycle)	1
Xanthomonadales	map01110	Biosynthesis of secondary metabolites	2			Fusobacteriales	map00071	Fatty acid degradation	1
Xanthomonadales	map01120	Microbial metabolism in diverse environments	4			Fusobacteriales	map00072		1
Xanthomonadales	map01130		2			Fusobacteriales	map00280	Valine, leucine and isoleucine degradation	1
Xanthomonadales	map01200	Carbon metabolism	4			Fusobacteriales	map00310	Lysine degradation	1
Xanthomonadales	map01212	Fatty acid metabolism	2			Fusobacteriales	map00350	Tyrosine metabolism	1
Xanthomonadales	map02020	Two-component system	3			Fusobacteriales	map00362	Benzoate degradation	1
Xanthomonadales	map02040	Flagellar assembly	1			Fusobacteriales	map00380	Tryptophan metabolism	1
Xanthomonadales	map04621	NOD-like receptor signaling pathway	1			Fusobacteriales	map00500	Starch and sucrose metabolism	2
Xanthomonadales	map04626	Plant-pathogen interaction	1			Fusobacteriales	map00620	Pyruvate metabolism	2
Xanthomonadales	map05132	Salmonella infection	1			Fusobacteriales	map00630	Glyoxylate and dicarboxylate metabolism	1
Xanthomonadales	map05134	Legionellosis	1			Fusobacteriales	map00640	Propanoate metabolism	1
						Fusobacteriales	map00650	Butanoate metabolism	1
						Fusobacteriales	map00710	Carbon fixation in photosynthetic organisms	1
						Fusobacteriales	map00720	Carbon fixation pathways in prokaryotes	1
						Fusobacteriales	map00900	Terpenoid backbone biosynthesis	1
						Fusobacteriales	map01100	Metabolic pathways	4
						Fusobacteriales	map01110	Biosynthesis of secondary metabolites	4
						Fusobacteriales	map01120	Microbial metabolism in diverse environments	2
						Fusobacteriales	map01130		2
						Fusobacteriales	map01200	Carbon metabolism	2
						Fusobacteriales	map01212	Fatty acid metabolism	1
						Fusobacteriales	map02020	Two-component system	1
						Fusobacteriales	map02026	Biofilm formation - Escherichia coli	2
						Fusobacteriales	map03010	Ribosome	1
						Fusobacteriales	map04217	Necroptosis	2
						Fusobacteriales	map04910	Insulin signaling pathway	2
						Fusobacteriales	map04922	Glucagon signaling pathway	2
						Fusobacteriales	map04931	Insulin resistance	2
						Haplosclerida	map02020	Two-component system	3
						Haplosclerida	map02040	Flagellar assembly	3
						Haplosclerida	map04621	NOD-like receptor signaling pathway	3
						Haplosclerida	map04626	Plant-pathogen interaction	3
						Haplosclerida	map05132	Salmonella infection	3
						Haplosclerida	map05134	Legionellosis	3
						Hymenoptera	map02020	Two-component system	1
						Hymenoptera	map02040	Flagellar assembly	1
						Hymenoptera	map04621	NOD-like receptor signaling pathway	1
						Hymenoptera	map04626	Plant-pathogen interaction	1
						Hymenoptera	map05132	Salmonella infection	1
						Hymenoptera	map05134	Legionellosis	1
						Hypocreales	map00500	Starch and sucrose metabolism	1
						Hypocreales	map00520	Amino sugar and nucleotide sugar metabolism	1
						Hypocreales	map01100	Metabolic pathways	1
						Hypocreales	map01110	Biosynthesis of secondary metabolites	1
						Hypocreales	map02026	Biofilm formation - Escherichia coli	1
						Ktedonobacterales	map00010	Glycolysis / Gluconeogenesis	1
						Ktedonobacterales	map00051	Fructose and mannose metabolism	1
						Ktedonobacterales	map00562	Inositol phosphate metabolism	1
						Ktedonobacterales	map00710	Carbon fixation in photosynthetic organisms	1
						Ktedonobacterales	map01100	Metabolic pathways	1
						Ktedonobacterales	map01110	Biosynthesis of secondary metabolites	1
						Ktedonobacterales	map01120	Microbial metabolism in diverse environments	1
						Ktedonobacterales	map01130		1
						Ktedonobacterales	map01200	Carbon metabolism	1
						Ktedonobacterales	map01230	Biosynthesis of amino acids	1
						Lactobacillales	map00010	Glycolysis / Gluconeogenesis	96
						Lactobacillales	map00020	Citrate cycle (TCA cycle)	3
						Lactobacillales	map00030	Pentose phosphate pathway	27
						Lactobacillales	map00051	Fructose and mannose metabolism	20
						Lactobacillales	map00052	Galactose metabolism	3
						Lactobacillales	map00071	Fatty acid degradation	1
						Lactobacillales	map00072		1
						Lactobacillales	map00190	Oxidative phosphorylation	2
						Lactobacillales	map00195	Photosynthesis	2
						Lactobacillales	map00220	Arginine biosynthesis	8
						Lactobacillales	map00230	Purine metabolism	34
						Lactobacillales	map00260	Glycine, serine and threonine metabolism	2
						Lactobacillales	map00270	Cysteine and methionine metabolism	12
						Lactobacillales	map00280	Valine, leucine and isoleucine degradation	1
						Lactobacillales	map00290	Valine, leucine and isoleucine biosynthesis	6
						Lactobacillales	map00310	Lysine degradation	1
						Lactobacillales	map00350	Tyrosine metabolism	4
						Lactobacillales	map00362	Benzoate degradation	1
						Lactobacillales	map00380	Tryptophan metabolism	1
						Lactobacillales	map00430	Taurine and hypotaurine metabolism	1
						Lactobacillales	map00480	Glutathione metabolism	8
						Lactobacillales	map00511	Other glycan degradation	1
						Lactobacillales	map00520	Amino sugar and nucleotide sugar metabolism	8
						Lactobacillales	map00562	Inositol phosphate metabolism	9
						Lactobacillales	map00620	Pyruvate metabolism	64
						Lactobacillales	map00630	Glyoxylate and dicarboxylate metabolism	7
						Lactobacillales	map00640	Propanoate metabolism	23
						Lactobacillales	map00650	Butanoate metabolism	18
						Lactobacillales	map00660	C5-Branched dibasic acid metabolism	6
						Lactobacillales	map00680	Methane metabolism	27
						Lactobacillales	map00710	Carbon fixation in photosynthetic organisms	40
						Lactobacillales	map00720	Carbon fixation pathways in prokaryotes	3
						Lactobacillales	map00770	Pantothenate and CoA biosynthesis	6
						Lactobacillales	map00791	Atrazine degradation	3
						Lactobacillales	map00900	Terpenoid backbone biosynthesis	1
						Lactobacillales	map01100	Metabolic pathways	151
						Lactobacillales	map01110	Biosynthesis of secondary metabolites	115
						Lactobacillales	map01120	Microbial metabolism in diverse environments	138
						Lactobacillales	map01130		116
						Lactobacillales	map01200	Carbon metabolism	94
						Lactobacillales	map01210	2-Oxocarboxylic acid metabolism	6
						Lactobacillales	map01212	Fatty acid metabolism	1
						Lactobacillales	map01230	Biosynthesis of amino acids	89
						Lactobacillales	map01501	beta-Lactam resistance	10
						Lactobacillales	map02010	ABC transporters	36
						Lactobacillales	map02020	Two-component system	3
						Lactobacillales	map02024	Quorum sensing	10
						Lactobacillales	map02030	Bacterial chemotaxis	1
						Lactobacillales	map02040	Flagellar assembly	1
						Lactobacillales	map02060	Phosphotransferase system (PTS)	8
						Lactobacillales	map03010	Ribosome	98
						Lactobacillales	map03018	RNA degradation	35
						Lactobacillales	map04066	HIF-1 signaling pathway	33
						Lactobacillales	map04152	AMPK signaling pathway	3
						Lactobacillales	map04212	Longevity regulating pathway - worm	15
						Lactobacillales	map04621	NOD-like receptor signaling pathway	1
						Lactobacillales	map04626	Plant-pathogen interaction	1
						Lactobacillales	map04922	Glucagon signaling pathway	45
						Lactobacillales	map04930	Type II diabetes mellitus	31
						Lactobacillales	map04940	Type I diabetes mellitus	15
						Lactobacillales	map05010	Alzheimer disease	16
						Lactobacillales	map05120	Epithelial cell signaling in Helicobacter pylori infection	3
						Lactobacillales	map05132	Salmonella infection	1
						Lactobacillales	map05134	Legionellosis	16
						Lactobacillales	map05152	Tuberculosis	15
						Lactobacillales	map05165	Human papillomavirus infection	31
						Lactobacillales	map05203	Viral carcinogenesis	31
						Lactobacillales	map05230	Central carbon metabolism in cancer	40
						Legionellales	map02020	Two-component system	1
						Legionellales	map02040	Flagellar assembly	1
						Legionellales	map04621	NOD-like receptor signaling pathway	1
						Legionellales	map04626	Plant-pathogen interaction	1
						Legionellales	map05132	Salmonella infection	1
						Legionellales	map05134	Legionellosis	1
						Lepidoptera	map02010	ABC transporters	1
						Marinilabiliales	map03010	Ribosome	1
						Methanobacteriales	map00511	Other glycan degradation	1
						Methanobacteriales	map00550	Peptidoglycan biosynthesis	1
						Methanobacteriales	map01100	Metabolic pathways	1
						Methanobacteriales	map01502	Vancomycin resistance	1
						Methanobacteriales	map02020	Two-component system	1
						Methanobacteriales	map05100	Bacterial invasion of epithelial cells	1
						Methanomicrobiales	map03018	RNA degradation	1
						Methanomicrobiales	map04212	Longevity regulating pathway - worm	1
						Methanomicrobiales	map05152	Tuberculosis	1
						Micrococcales	map00010	Glycolysis / Gluconeogenesis	1
						Micrococcales	map00680	Methane metabolism	1
						Micrococcales	map01100	Metabolic pathways	1
						Micrococcales	map01110	Biosynthesis of secondary metabolites	1
						Micrococcales	map01120	Microbial metabolism in diverse environments	1
						Micrococcales	map01130		1
						Micrococcales	map01200	Carbon metabolism	1
						Micrococcales	map01230	Biosynthesis of amino acids	1
						Micrococcales	map01501	beta-Lactam resistance	3
						Micrococcales	map02010	ABC transporters	3
						Micrococcales	map02024	Quorum sensing	3
						Micrococcales	map03018	RNA degradation	1
						Micrococcales	map04066	HIF-1 signaling pathway	1
						Mycoplasmatales	map02020	Two-component system	1
						Mycoplasmatales	map02040	Flagellar assembly	1
						Mycoplasmatales	map04621	NOD-like receptor signaling pathway	1
						Mycoplasmatales	map04626	Plant-pathogen interaction	1
						Mycoplasmatales	map05132	Salmonella infection	1
						Mycoplasmatales	map05134	Legionellosis	1
						Myxococcales	map03010	Ribosome	1
						Neisseriales	map00220	Arginine biosynthesis	1
						Neisseriales	map00250	Alanine, aspartate and glutamate metabolism	1
						Neisseriales	map00471		1
						Neisseriales	map00910	Nitrogen metabolism	1
						Neisseriales	map01100	Metabolic pathways	1
						Neisseriales	map01200	Carbon metabolism	1
						Neisseriales	map04217	Necroptosis	1
						Neisseriales	map04964	Proximal tubule bicarbonate reclamation	1
						Nitrosomonadales	map02020	Two-component system	1
						Nitrosomonadales	map02040	Flagellar assembly	1
						Nitrosomonadales	map04621	NOD-like receptor signaling pathway	1
						Nitrosomonadales	map04626	Plant-pathogen interaction	1
						Nitrosomonadales	map05132	Salmonella infection	1
						Nitrosomonadales	map05134	Legionellosis	1
						Nitrososphaerales	map02020	Two-component system	1
						Nitrososphaerales	map02040	Flagellar assembly	1
						Nitrososphaerales	map04621	NOD-like receptor signaling pathway	1
						Nitrososphaerales	map04626	Plant-pathogen interaction	1
						Nitrososphaerales	map05132	Salmonella infection	1
						Nitrososphaerales	map05134	Legionellosis	1
						Nitrospirales	map00670	One carbon pool by folate	2
						Nitrospirales	map00720	Carbon fixation pathways in prokaryotes	2
						Nitrospirales	map01100	Metabolic pathways	2
						Nitrospirales	map01120	Microbial metabolism in diverse environments	2
						Nitrospirales	map01200	Carbon metabolism	2
						Oceanospirillales	map00220	Arginine biosynthesis	1
						Oceanospirillales	map00250	Alanine, aspartate and glutamate metabolism	1
						Oceanospirillales	map00270	Cysteine and methionine metabolism	1
						Oceanospirillales	map00330	Arginine and proline metabolism	1
						Oceanospirillales	map00350	Tyrosine metabolism	1
						Oceanospirillales	map00360	Phenylalanine metabolism	1
						Oceanospirillales	map00400	Phenylalanine, tyrosine and tryptophan biosynthesis	1
						Oceanospirillales	map00401	Novobiocin biosynthesis	1
						Oceanospirillales	map00950	Isoquinoline alkaloid biosynthesis	1
						Oceanospirillales	map00960	Tropane, piperidine and pyridine alkaloid biosynthesis	1
						Oceanospirillales	map01100	Metabolic pathways	1
						Oceanospirillales	map01110	Biosynthesis of secondary metabolites	1
						Oceanospirillales	map01130		1
						Oceanospirillales	map01210	2-Oxocarboxylic acid metabolism	1
						Oceanospirillales	map01230	Biosynthesis of amino acids	1
						Opisthorchiida	map00230	Purine metabolism	1
						Opisthorchiida	map00240	Pyrimidine metabolism	1
						Opisthorchiida	map00511	Other glycan degradation	1
						Opisthorchiida	map00550	Peptidoglycan biosynthesis	1
						Opisthorchiida	map00730	Thiamine metabolism	1
						Opisthorchiida	map00760	Nicotinate and nicotinamide metabolism	1
						Opisthorchiida	map00790	Folate biosynthesis	1
						Opisthorchiida	map01100	Metabolic pathways	2
						Opisthorchiida	map01110	Biosynthesis of secondary metabolites	1
						Opisthorchiida	map01502	Vancomycin resistance	1
						Opisthorchiida	map02020	Two-component system	2
						Opisthorchiida	map05100	Bacterial invasion of epithelial cells	1
						Ortervirales	map02010	ABC transporters	1
						Oscillatoriales	map02010	ABC transporters	2
						Parachlamydiales	map00480	Glutathione metabolism	1
						Parachlamydiales	map01100	Metabolic pathways	1
						Pasteurellales	map00220	Arginine biosynthesis	2
						Pasteurellales	map00250	Alanine, aspartate and glutamate metabolism	2
						Pasteurellales	map00910	Nitrogen metabolism	2
						Pasteurellales	map01100	Metabolic pathways	2
						Perkinsida	map00010	Glycolysis / Gluconeogenesis	1
						Perkinsida	map00020	Citrate cycle (TCA cycle)	1
						Perkinsida	map00620	Pyruvate metabolism	1
						Perkinsida	map00650	Butanoate metabolism	1
						Perkinsida	map00720	Carbon fixation pathways in prokaryotes	1
						Perkinsida	map01100	Metabolic pathways	1
						Perkinsida	map01120	Microbial metabolism in diverse environments	1
						Perkinsida	map01130		1
						Perkinsida	map01200	Carbon metabolism	1
						Pirellulales	map02010	ABC transporters	1
						Pirellulales	map02030	Bacterial chemotaxis	1
						Pleosporales	map00650	Butanoate metabolism	1
						Pleosporales	map01200	Carbon metabolism	1
						Pseudomonadales	map00010	Glycolysis / Gluconeogenesis	1
						Pseudomonadales	map00020	Citrate cycle (TCA cycle)	1
						Pseudomonadales	map00052	Galactose metabolism	2
						Pseudomonadales	map00511	Other glycan degradation	2
						Pseudomonadales	map00600	Sphingolipid metabolism	2
						Pseudomonadales	map00620	Pyruvate metabolism	1
						Pseudomonadales	map00650	Butanoate metabolism	1
						Pseudomonadales	map00720	Carbon fixation pathways in prokaryotes	1
						Pseudomonadales	map01100	Metabolic pathways	3
						Pseudomonadales	map01120	Microbial metabolism in diverse environments	1
						Pseudomonadales	map01130		1
						Pseudomonadales	map01200	Carbon metabolism	1
						Pucciniales	map02020	Two-component system	2
						Pucciniales	map02040	Flagellar assembly	2
						Pucciniales	map04621	NOD-like receptor signaling pathway	2
						Pucciniales	map04626	Plant-pathogen interaction	2
						Pucciniales	map05132	Salmonella infection	2
						Pucciniales	map05134	Legionellosis	2
						Rhizobiales	map00010	Glycolysis / Gluconeogenesis	1
						Rhizobiales	map00030	Pentose phosphate pathway	1
						Rhizobiales	map00071	Fatty acid degradation	1
						Rhizobiales	map00072		1
						Rhizobiales	map00230	Purine metabolism	1
						Rhizobiales	map00280	Valine, leucine and isoleucine degradation	1
						Rhizobiales	map00310	Lysine degradation	1
						Rhizobiales	map00362	Benzoate degradation	1
						Rhizobiales	map00380	Tryptophan metabolism	1
						Rhizobiales	map00620	Pyruvate metabolism	2
						Rhizobiales	map00630	Glyoxylate and dicarboxylate metabolism	2
						Rhizobiales	map00640	Propanoate metabolism	1
						Rhizobiales	map00650	Butanoate metabolism	1
						Rhizobiales	map00720	Carbon fixation pathways in prokaryotes	1
						Rhizobiales	map00900	Terpenoid backbone biosynthesis	1
						Rhizobiales	map01100	Metabolic pathways	3
						Rhizobiales	map01110	Biosynthesis of secondary metabolites	2
						Rhizobiales	map01120	Microbial metabolism in diverse environments	3
						Rhizobiales	map01130		2
						Rhizobiales	map01200	Carbon metabolism	3
						Rhizobiales	map01212	Fatty acid metabolism	1
						Rhizobiales	map01230	Biosynthesis of amino acids	1
						Rhizobiales	map02020	Two-component system	1
						Rhizobiales	map04922	Glucagon signaling pathway	1
						Rhizobiales	map04930	Type II diabetes mellitus	1
						Rhizobiales	map05165	Human papillomavirus infection	1
						Rhizobiales	map05203	Viral carcinogenesis	1
						Rhizobiales	map05230	Central carbon metabolism in cancer	1
						Rhodobacterales	map00052	Galactose metabolism	1
						Rhodobacterales	map00220	Arginine biosynthesis	2
						Rhodobacterales	map00250	Alanine, aspartate and glutamate metabolism	2
						Rhodobacterales	map00471		2
						Rhodobacterales	map00520	Amino sugar and nucleotide sugar metabolism	1
						Rhodobacterales	map00910	Nitrogen metabolism	2
						Rhodobacterales	map01100	Metabolic pathways	3
						Rhodobacterales	map01200	Carbon metabolism	2
						Rhodobacterales	map02020	Two-component system	1
						Rhodobacterales	map02024	Quorum sensing	5
						Rhodobacterales	map02040	Flagellar assembly	2
						Rhodobacterales	map04217	Necroptosis	2
						Rhodobacterales	map04621	NOD-like receptor signaling pathway	1
						Rhodobacterales	map04626	Plant-pathogen interaction	1
						Rhodobacterales	map04964	Proximal tubule bicarbonate reclamation	2
						Rhodobacterales	map05132	Salmonella infection	1
						Rhodobacterales	map05134	Legionellosis	1
						Rhodospirillales	map00190	Oxidative phosphorylation	1
						Rhodospirillales	map00195	Photosynthesis	1
						Rhodospirillales	map00564	Glycerophospholipid metabolism	1
						Rhodospirillales	map01100	Metabolic pathways	2
						Rhodospirillales	map01110	Biosynthesis of secondary metabolites	1
						Rhodospirillales	map03010	Ribosome	1
						Saccharomycetales	map00071	Fatty acid degradation	1
						Saccharomycetales	map00072		1
						Saccharomycetales	map00280	Valine, leucine and isoleucine degradation	1
						Saccharomycetales	map00310	Lysine degradation	1
						Saccharomycetales	map00362	Benzoate degradation	1
						Saccharomycetales	map00380	Tryptophan metabolism	1
						Saccharomycetales	map00620	Pyruvate metabolism	1
						Saccharomycetales	map00630	Glyoxylate and dicarboxylate metabolism	1
						Saccharomycetales	map00640	Propanoate metabolism	1
						Saccharomycetales	map00650	Butanoate metabolism	1
						Saccharomycetales	map00720	Carbon fixation pathways in prokaryotes	1
						Saccharomycetales	map00900	Terpenoid backbone biosynthesis	1
						Saccharomycetales	map01100	Metabolic pathways	1
						Saccharomycetales	map01110	Biosynthesis of secondary metabolites	1
						Saccharomycetales	map01120	Microbial metabolism in diverse environments	1
						Saccharomycetales	map01130		1
						Saccharomycetales	map01200	Carbon metabolism	1
						Saccharomycetales	map01212	Fatty acid metabolism	1
						Saccharomycetales	map02020	Two-component system	2
						Saccharomycetales	map02040	Flagellar assembly	1
						Saccharomycetales	map04621	NOD-like receptor signaling pathway	1
						Saccharomycetales	map04626	Plant-pathogen interaction	1
						Saccharomycetales	map05132	Salmonella infection	1
						Saccharomycetales	map05134	Legionellosis	1
						Selenomonadales	map00030	Pentose phosphate pathway	1
						Selenomonadales	map00261	Monobactam biosynthesis	1
						Selenomonadales	map00300	Lysine biosynthesis	1
						Selenomonadales	map00620	Pyruvate metabolism	8
						Selenomonadales	map00640	Propanoate metabolism	8
						Selenomonadales	map00643	Styrene degradation	3
						Selenomonadales	map00650	Butanoate metabolism	5
						Selenomonadales	map00670	One carbon pool by folate	1
						Selenomonadales	map00710	Carbon fixation in photosynthetic organisms	1
						Selenomonadales	map00720	Carbon fixation pathways in prokaryotes	1
						Selenomonadales	map01051	Biosynthesis of ansamycins	1
						Selenomonadales	map01100	Metabolic pathways	11
						Selenomonadales	map01110	Biosynthesis of secondary metabolites	2
						Selenomonadales	map01120	Microbial metabolism in diverse environments	11
						Selenomonadales	map01130		2
						Selenomonadales	map01200	Carbon metabolism	2
						Selenomonadales	map01230	Biosynthesis of amino acids	2
						Selenomonadales	map03010	Ribosome	1
						Solanales	map00010	Glycolysis / Gluconeogenesis	1
						Solanales	map00270	Cysteine and methionine metabolism	1
						Solanales	map00620	Pyruvate metabolism	1
						Solanales	map00640	Propanoate metabolism	1
						Solanales	map01100	Metabolic pathways	1
						Solanales	map01110	Biosynthesis of secondary metabolites	1
						Solanales	map01120	Microbial metabolism in diverse environments	1
						Solanales	map01130		1
						Solanales	map04922	Glucagon signaling pathway	1
						Sphingobacteriales	map00680	Methane metabolism	2
						Sphingobacteriales	map00720	Carbon fixation pathways in prokaryotes	2
						Sphingobacteriales	map01120	Microbial metabolism in diverse environments	2
						Sphingobacteriales	map01200	Carbon metabolism	2
						Sphingobacteriales	map03010	Ribosome	4
						Sphingomonadales	map00460	Cyanoamino acid metabolism	1
						Sphingomonadales	map00500	Starch and sucrose metabolism	1
						Sphingomonadales	map00940	Phenylpropanoid biosynthesis	1
						Sphingomonadales	map01100	Metabolic pathways	1
						Sphingomonadales	map01110	Biosynthesis of secondary metabolites	1
						Sphingomonadales	map03018	RNA degradation	2
						Sphingomonadales	map04212	Longevity regulating pathway - worm	2
						Sphingomonadales	map04940	Type I diabetes mellitus	2
						Sphingomonadales	map05134	Legionellosis	2
						Sphingomonadales	map05152	Tuberculosis	2
						Spirochaetales	map00010	Glycolysis / Gluconeogenesis	2
						Spirochaetales	map00020	Citrate cycle (TCA cycle)	1
						Spirochaetales	map00620	Pyruvate metabolism	1
						Spirochaetales	map00650	Butanoate metabolism	1
						Spirochaetales	map00680	Methane metabolism	1
						Spirochaetales	map00720	Carbon fixation pathways in prokaryotes	1
						Spirochaetales	map01100	Metabolic pathways	2
						Spirochaetales	map01110	Biosynthesis of secondary metabolites	1
						Spirochaetales	map01120	Microbial metabolism in diverse environments	2
						Spirochaetales	map01130		2
						Spirochaetales	map01200	Carbon metabolism	2
						Spirochaetales	map01230	Biosynthesis of amino acids	1
						Spirochaetales	map01501	beta-Lactam resistance	1
						Spirochaetales	map02010	ABC transporters	5
						Spirochaetales	map02024	Quorum sensing	3
						Spirochaetales	map03018	RNA degradation	1
						Spirochaetales	map04066	HIF-1 signaling pathway	1
						Streptomycetales	map00010	Glycolysis / Gluconeogenesis	1
						Streptomycetales	map00020	Citrate cycle (TCA cycle)	1
						Streptomycetales	map00030	Pentose phosphate pathway	1
						Streptomycetales	map00511	Other glycan degradation	1
						Streptomycetales	map00600	Sphingolipid metabolism	1
						Streptomycetales	map00620	Pyruvate metabolism	1
						Streptomycetales	map00650	Butanoate metabolism	1
						Streptomycetales	map00710	Carbon fixation in photosynthetic organisms	1
						Streptomycetales	map00720	Carbon fixation pathways in prokaryotes	1
						Streptomycetales	map01051	Biosynthesis of ansamycins	1
						Streptomycetales	map01100	Metabolic pathways	2
						Streptomycetales	map01110	Biosynthesis of secondary metabolites	1
						Streptomycetales	map01120	Microbial metabolism in diverse environments	2
						Streptomycetales	map01130		2
						Streptomycetales	map01200	Carbon metabolism	2
						Streptomycetales	map01230	Biosynthesis of amino acids	1
						Streptomycetales	map01501	beta-Lactam resistance	2
						Streptomycetales	map02010	ABC transporters	2
						Streptomycetales	map02020	Two-component system	1
						Streptomycetales	map02024	Quorum sensing	2
						Streptomycetales	map02040	Flagellar assembly	1
						Streptomycetales	map04142	Lysosome	1
						Streptomycetales	map04621	NOD-like receptor signaling pathway	1
						Streptomycetales	map04626	Plant-pathogen interaction	1
						Streptomycetales	map05132	Salmonella infection	1
						Streptomycetales	map05134	Legionellosis	1
						Strigeidida	map01501	beta-Lactam resistance	1
						Strigeidida	map02010	ABC transporters	1
						Strigeidida	map02024	Quorum sensing	1
						Strongylida	map00010	Glycolysis / Gluconeogenesis	1
						Strongylida	map00020	Citrate cycle (TCA cycle)	1
						Strongylida	map00620	Pyruvate metabolism	1
						Strongylida	map00710	Carbon fixation in photosynthetic organisms	1
						Strongylida	map01100	Metabolic pathways	1
						Strongylida	map01110	Biosynthesis of secondary metabolites	1
						Strongylida	map01120	Microbial metabolism in diverse environments	1
						Strongylida	map01130		1
						Strongylida	map01200	Carbon metabolism	1
						Synechococcales	map00620	Pyruvate metabolism	1
						Synechococcales	map00640	Propanoate metabolism	1
						Synechococcales	map00650	Butanoate metabolism	1
						Synechococcales	map01100	Metabolic pathways	1
						Synechococcales	map01120	Microbial metabolism in diverse environments	1
						Syntrophobacterales	map03018	RNA degradation	1
						Syntrophobacterales	map04212	Longevity regulating pathway - worm	1
						Syntrophobacterales	map04940	Type I diabetes mellitus	1
						Syntrophobacterales	map05134	Legionellosis	1
						Syntrophobacterales	map05152	Tuberculosis	1
						Thermoanaerobacterales	map02010	ABC transporters	1
						Thermoanaerobacterales	map03010	Ribosome	1
						Thermococcales	map00010	Glycolysis / Gluconeogenesis	2
						Thermococcales	map00020	Citrate cycle (TCA cycle)	2
						Thermococcales	map00620	Pyruvate metabolism	2
						Thermococcales	map00710	Carbon fixation in photosynthetic organisms	2
						Thermococcales	map01100	Metabolic pathways	2
						Thermococcales	map01110	Biosynthesis of secondary metabolites	2
						Thermococcales	map01120	Microbial metabolism in diverse environments	2
						Thermococcales	map01130		2
						Thermococcales	map01200	Carbon metabolism	2
						Thermosediminibacterales	map03010	Ribosome	1
						Tissierellales	map02020	Two-component system	2
						Tissierellales	map02040	Flagellar assembly	2
						Tissierellales	map04621	NOD-like receptor signaling pathway	2
						Tissierellales	map04626	Plant-pathogen interaction	2
						Tissierellales	map05132	Salmonella infection	2
						Tissierellales	map05134	Legionellosis	2
						Trichinellida	map02010	ABC transporters	1
						Trypanosomatida	map00010	Glycolysis / Gluconeogenesis	2
						Trypanosomatida	map00710	Carbon fixation in photosynthetic organisms	2
						Trypanosomatida	map01100	Metabolic pathways	2
						Trypanosomatida	map01110	Biosynthesis of secondary metabolites	2
						Trypanosomatida	map01120	Microbial metabolism in diverse environments	2
						Trypanosomatida	map01130		2
						Trypanosomatida	map01200	Carbon metabolism	2
						Trypanosomatida	map01230	Biosynthesis of amino acids	2
						Trypanosomatida	map04066	HIF-1 signaling pathway	2
						Trypanosomatida	map05010	Alzheimer disease	2
						Verrucomicrobiales	map02020	Two-component system	1
						Verrucomicrobiales	map02040	Flagellar assembly	1
						Verrucomicrobiales	map04621	NOD-like receptor signaling pathway	1
						Verrucomicrobiales	map04626	Plant-pathogen interaction	1
						Verrucomicrobiales	map05132	Salmonella infection	1
						Verrucomicrobiales	map05134	Legionellosis	1
						Vibrionales	map00010	Glycolysis / Gluconeogenesis	1
						Vibrionales	map00030	Pentose phosphate pathway	1
						Vibrionales	map00051	Fructose and mannose metabolism	1
						Vibrionales	map00052	Galactose metabolism	1
						Vibrionales	map00230	Purine metabolism	1
						Vibrionales	map00240	Pyrimidine metabolism	1
						Vibrionales	map00680	Methane metabolism	1
						Vibrionales	map00760	Nicotinate and nicotinamide metabolism	1
						Vibrionales	map01100	Metabolic pathways	2
						Vibrionales	map01110	Biosynthesis of secondary metabolites	2
						Vibrionales	map01120	Microbial metabolism in diverse environments	1
						Vibrionales	map01130		1
						Xanthomonadales	map00071	Fatty acid degradation	2
						Xanthomonadales	map00072		2
						Xanthomonadales	map00280	Valine, leucine and isoleucine degradation	2
						Xanthomonadales	map00310	Lysine degradation	2
						Xanthomonadales	map00362	Benzoate degradation	2
						Xanthomonadales	map00380	Tryptophan metabolism	2
						Xanthomonadales	map00620	Pyruvate metabolism	2
						Xanthomonadales	map00630	Glyoxylate and dicarboxylate metabolism	2
						Xanthomonadales	map00640	Propanoate metabolism	2
						Xanthomonadales	map00650	Butanoate metabolism	2
						Xanthomonadales	map00680	Methane metabolism	2
						Xanthomonadales	map00720	Carbon fixation pathways in prokaryotes	4
						Xanthomonadales	map00900	Terpenoid backbone biosynthesis	2
						Xanthomonadales	map01100	Metabolic pathways	2
						Xanthomonadales	map01110	Biosynthesis of secondary metabolites	2
						Xanthomonadales	map01120	Microbial metabolism in diverse environments	4
						Xanthomonadales	map01130		2
						Xanthomonadales	map01200	Carbon metabolism	4
						Xanthomonadales	map01212	Fatty acid metabolism	2
						Xanthomonadales	map02020	Two-component system	3
						Xanthomonadales	map02040	Flagellar assembly	1
						Xanthomonadales	map04621	NOD-like receptor signaling pathway	1
						Xanthomonadales	map04626	Plant-pathogen interaction	1
						Xanthomonadales	map05132	Salmonella infection	1
						Xanthomonadales	map05134	Legionellosis	1

## Sheet: Family
DDA-PASEF						DIA-PASEF
Family	KEGG_Pathway	Pathway name	Total peptide count			Family	KEGG_Pathway	Pathway name	Total peptide count
Anaplasmataceae	map00010	Glycolysis / Gluconeogenesis	1			Acetobacteraceae	map00190	Oxidative phosphorylation	1
Anaplasmataceae	map00030	Pentose phosphate pathway	1			Acetobacteraceae	map00195	Photosynthesis	1
Anaplasmataceae	map00052	Galactose metabolism	1			Acetobacteraceae	map01100	Metabolic pathways	1
Anaplasmataceae	map00230	Purine metabolism	1			Acetobacteraceae	map03010	Ribosome	1
Anaplasmataceae	map00500	Starch and sucrose metabolism	1			Acidaminococcaceae	map00362	Benzoate degradation	1
Anaplasmataceae	map00520	Amino sugar and nucleotide sugar metabolism	1			Acidaminococcaceae	map01100	Metabolic pathways	1
Anaplasmataceae	map00521	Streptomycin biosynthesis	1			Acidaminococcaceae	map01120	Microbial metabolism in diverse environments	1
Anaplasmataceae	map01100	Metabolic pathways	1			Acidaminococcaceae	map01220	Degradation of aromatic compounds	1
Anaplasmataceae	map01110	Biosynthesis of secondary metabolites	1			Acidimicrobiaceae	map02020	Two-component system	1
Anaplasmataceae	map01120	Microbial metabolism in diverse environments	1			Acidimicrobiaceae	map02040	Flagellar assembly	1
Anaplasmataceae	map01130		1			Acidimicrobiaceae	map04621	NOD-like receptor signaling pathway	1
Atheliaceae	map02020	Two-component system	2			Acidimicrobiaceae	map04626	Plant-pathogen interaction	1
Atheliaceae	map02040	Flagellar assembly	2			Acidimicrobiaceae	map05132	Salmonella infection	1
Atheliaceae	map04621	NOD-like receptor signaling pathway	2			Acidimicrobiaceae	map05134	Legionellosis	1
Atheliaceae	map04626	Plant-pathogen interaction	2			Alcaligenaceae	map02020	Two-component system	1
Atheliaceae	map05132	Salmonella infection	2			Alcaligenaceae	map02030	Bacterial chemotaxis	1
Atheliaceae	map05134	Legionellosis	2			Alteromonadaceae	map02020	Two-component system	1
Bacillaceae	map00071	Fatty acid degradation	2			Alteromonadaceae	map02040	Flagellar assembly	1
Bacillaceae	map00072		2			Alteromonadaceae	map04621	NOD-like receptor signaling pathway	1
Bacillaceae	map00220	Arginine biosynthesis	1			Alteromonadaceae	map04626	Plant-pathogen interaction	1
Bacillaceae	map00250	Alanine, aspartate and glutamate metabolism	1			Alteromonadaceae	map05132	Salmonella infection	1
Bacillaceae	map00280	Valine, leucine and isoleucine degradation	2			Alteromonadaceae	map05134	Legionellosis	1
Bacillaceae	map00310	Lysine degradation	2			Anaerolineaceae	map00270	Cysteine and methionine metabolism	3
Bacillaceae	map00362	Benzoate degradation	2			Anaerolineaceae	map00280	Valine, leucine and isoleucine degradation	3
Bacillaceae	map00380	Tryptophan metabolism	2			Anaerolineaceae	map00290	Valine, leucine and isoleucine biosynthesis	3
Bacillaceae	map00471		1			Anaerolineaceae	map00770	Pantothenate and CoA biosynthesis	3
Bacillaceae	map00620	Pyruvate metabolism	2			Anaerolineaceae	map00790	Folate biosynthesis	3
Bacillaceae	map00630	Glyoxylate and dicarboxylate metabolism	2			Anaerolineaceae	map01100	Metabolic pathways	3
Bacillaceae	map00640	Propanoate metabolism	2			Anaerolineaceae	map01110	Biosynthesis of secondary metabolites	3
Bacillaceae	map00650	Butanoate metabolism	2			Anaerolineaceae	map01130		3
Bacillaceae	map00670	One carbon pool by folate	1			Anaerolineaceae	map01210	2-Oxocarboxylic acid metabolism	3
Bacillaceae	map00720	Carbon fixation pathways in prokaryotes	3			Anaerolineaceae	map01230	Biosynthesis of amino acids	3
Bacillaceae	map00900	Terpenoid backbone biosynthesis	2			Atheliaceae	map02020	Two-component system	2
Bacillaceae	map00910	Nitrogen metabolism	1			Atheliaceae	map02040	Flagellar assembly	2
Bacillaceae	map01100	Metabolic pathways	4			Atheliaceae	map04621	NOD-like receptor signaling pathway	2
Bacillaceae	map01110	Biosynthesis of secondary metabolites	2			Atheliaceae	map04626	Plant-pathogen interaction	2
Bacillaceae	map01120	Microbial metabolism in diverse environments	3			Atheliaceae	map05132	Salmonella infection	2
Bacillaceae	map01130		2			Atheliaceae	map05134	Legionellosis	2
Bacillaceae	map01200	Carbon metabolism	4			Atopobiaceae	map02010	ABC transporters	1
Bacillaceae	map01212	Fatty acid metabolism	2			Bacillaceae	map00030	Pentose phosphate pathway	3
Bacillaceae	map02020	Two-component system	3			Bacillaceae	map00040	Pentose and glucuronate interconversions	1
Bacillaceae	map02040	Flagellar assembly	1			Bacillaceae	map00071	Fatty acid degradation	2
Bacillaceae	map04217	Necroptosis	1			Bacillaceae	map00072		2
Bacillaceae	map04621	NOD-like receptor signaling pathway	1			Bacillaceae	map00220	Arginine biosynthesis	2
Bacillaceae	map04626	Plant-pathogen interaction	1			Bacillaceae	map00250	Alanine, aspartate and glutamate metabolism	2
Bacillaceae	map04964	Proximal tubule bicarbonate reclamation	1			Bacillaceae	map00280	Valine, leucine and isoleucine degradation	2
Bacillaceae	map05132	Salmonella infection	1			Bacillaceae	map00310	Lysine degradation	2
Bacillaceae	map05134	Legionellosis	1			Bacillaceae	map00362	Benzoate degradation	2
Bacteriovoracaceae	map02020	Two-component system	3			Bacillaceae	map00380	Tryptophan metabolism	2
Bacteriovoracaceae	map02040	Flagellar assembly	3			Bacillaceae	map00471		2
Bacteriovoracaceae	map04621	NOD-like receptor signaling pathway	3			Bacillaceae	map00511	Other glycan degradation	1
Bacteriovoracaceae	map04626	Plant-pathogen interaction	3			Bacillaceae	map00531	Glycosaminoglycan degradation	1
Bacteriovoracaceae	map05132	Salmonella infection	3			Bacillaceae	map00550	Peptidoglycan biosynthesis	1
Bacteriovoracaceae	map05134	Legionellosis	3			Bacillaceae	map00620	Pyruvate metabolism	2
Bacteroidaceae	map00010	Glycolysis / Gluconeogenesis	38			Bacillaceae	map00630	Glyoxylate and dicarboxylate metabolism	2
Bacteroidaceae	map00020	Citrate cycle (TCA cycle)	9			Bacillaceae	map00640	Propanoate metabolism	2
Bacteroidaceae	map00040	Pentose and glucuronate interconversions	4			Bacillaceae	map00650	Butanoate metabolism	2
Bacteroidaceae	map00051	Fructose and mannose metabolism	11			Bacillaceae	map00710	Carbon fixation in photosynthetic organisms	3
Bacteroidaceae	map00220	Arginine biosynthesis	1			Bacillaceae	map00720	Carbon fixation pathways in prokaryotes	2
Bacteroidaceae	map00250	Alanine, aspartate and glutamate metabolism	1			Bacillaceae	map00900	Terpenoid backbone biosynthesis	2
Bacteroidaceae	map00270	Cysteine and methionine metabolism	1			Bacillaceae	map00910	Nitrogen metabolism	2
Bacteroidaceae	map00290	Valine, leucine and isoleucine biosynthesis	1			Bacillaceae	map01051	Biosynthesis of ansamycins	3
Bacteroidaceae	map00480	Glutathione metabolism	1			Bacillaceae	map01100	Metabolic pathways	10
Bacteroidaceae	map00500	Starch and sucrose metabolism	1			Bacillaceae	map01110	Biosynthesis of secondary metabolites	5
Bacteroidaceae	map00562	Inositol phosphate metabolism	6			Bacillaceae	map01120	Microbial metabolism in diverse environments	5
Bacteroidaceae	map00620	Pyruvate metabolism	17			Bacillaceae	map01130		5
Bacteroidaceae	map00623	Toluene degradation	2			Bacillaceae	map01200	Carbon metabolism	7
Bacteroidaceae	map00627	Aminobenzoate degradation	1			Bacillaceae	map01212	Fatty acid metabolism	2
Bacteroidaceae	map00630	Glyoxylate and dicarboxylate metabolism	1			Bacillaceae	map01230	Biosynthesis of amino acids	3
Bacteroidaceae	map00650	Butanoate metabolism	4			Bacillaceae	map01502	Vancomycin resistance	1
Bacteroidaceae	map00660	C5-Branched dibasic acid metabolism	1			Bacillaceae	map02020	Two-component system	8
Bacteroidaceae	map00680	Methane metabolism	16			Bacillaceae	map02040	Flagellar assembly	5
Bacteroidaceae	map00710	Carbon fixation in photosynthetic organisms	29			Bacillaceae	map04217	Necroptosis	2
Bacteroidaceae	map00720	Carbon fixation pathways in prokaryotes	12			Bacillaceae	map04621	NOD-like receptor signaling pathway	5
Bacteroidaceae	map00770	Pantothenate and CoA biosynthesis	1			Bacillaceae	map04626	Plant-pathogen interaction	5
Bacteroidaceae	map00910	Nitrogen metabolism	1			Bacillaceae	map04964	Proximal tubule bicarbonate reclamation	2
Bacteroidaceae	map01100	Metabolic pathways	57			Bacillaceae	map05100	Bacterial invasion of epithelial cells	1
Bacteroidaceae	map01110	Biosynthesis of secondary metabolites	37			Bacillaceae	map05132	Salmonella infection	5
Bacteroidaceae	map01120	Microbial metabolism in diverse environments	52			Bacillaceae	map05134	Legionellosis	5
Bacteroidaceae	map01130		40			Bacteroidaceae	map00010	Glycolysis / Gluconeogenesis	21
Bacteroidaceae	map01200	Carbon metabolism	47			Bacteroidaceae	map00020	Citrate cycle (TCA cycle)	5
Bacteroidaceae	map01210	2-Oxocarboxylic acid metabolism	1			Bacteroidaceae	map00030	Pentose phosphate pathway	1
Bacteroidaceae	map01220	Degradation of aromatic compounds	2			Bacteroidaceae	map00040	Pentose and glucuronate interconversions	2
Bacteroidaceae	map01230	Biosynthesis of amino acids	31			Bacteroidaceae	map00051	Fructose and mannose metabolism	3
Bacteroidaceae	map03010	Ribosome	22			Bacteroidaceae	map00052	Galactose metabolism	1
Bacteroidaceae	map03018	RNA degradation	15			Bacteroidaceae	map00220	Arginine biosynthesis	2
Bacteroidaceae	map04066	HIF-1 signaling pathway	24			Bacteroidaceae	map00250	Alanine, aspartate and glutamate metabolism	2
Bacteroidaceae	map05010	Alzheimer disease	9			Bacteroidaceae	map00260	Glycine, serine and threonine metabolism	2
Brachyspiraceae	map00561	Glycerolipid metabolism	1			Bacteroidaceae	map00270	Cysteine and methionine metabolism	1
Brachyspiraceae	map00640	Propanoate metabolism	1			Bacteroidaceae	map00290	Valine, leucine and isoleucine biosynthesis	2
Brucellaceae	map00030	Pentose phosphate pathway	1			Bacteroidaceae	map00430	Taurine and hypotaurine metabolism	1
Brucellaceae	map00630	Glyoxylate and dicarboxylate metabolism	1			Bacteroidaceae	map00460	Cyanoamino acid metabolism	1
Brucellaceae	map01100	Metabolic pathways	1			Bacteroidaceae	map00480	Glutathione metabolism	1
Brucellaceae	map01120	Microbial metabolism in diverse environments	1			Bacteroidaceae	map00500	Starch and sucrose metabolism	3
Brucellaceae	map01200	Carbon metabolism	1			Bacteroidaceae	map00520	Amino sugar and nucleotide sugar metabolism	1
Cardiobacteriaceae	map00010	Glycolysis / Gluconeogenesis	1			Bacteroidaceae	map00521	Streptomycin biosynthesis	1
Cardiobacteriaceae	map00710	Carbon fixation in photosynthetic organisms	1			Bacteroidaceae	map00524	Neomycin, kanamycin and gentamicin biosynthesis	1
Cardiobacteriaceae	map01100	Metabolic pathways	1			Bacteroidaceae	map00562	Inositol phosphate metabolism	2
Cardiobacteriaceae	map01110	Biosynthesis of secondary metabolites	1			Bacteroidaceae	map00620	Pyruvate metabolism	11
Cardiobacteriaceae	map01120	Microbial metabolism in diverse environments	1			Bacteroidaceae	map00623	Toluene degradation	1
Cardiobacteriaceae	map01130		1			Bacteroidaceae	map00627	Aminobenzoate degradation	2
Cardiobacteriaceae	map01200	Carbon metabolism	1			Bacteroidaceae	map00630	Glyoxylate and dicarboxylate metabolism	2
Cardiobacteriaceae	map01230	Biosynthesis of amino acids	1			Bacteroidaceae	map00640	Propanoate metabolism	1
Cardiobacteriaceae	map04066	HIF-1 signaling pathway	1			Bacteroidaceae	map00650	Butanoate metabolism	2
Cardiobacteriaceae	map05010	Alzheimer disease	1			Bacteroidaceae	map00660	C5-Branched dibasic acid metabolism	2
Catabacteriaceae	map00010	Glycolysis / Gluconeogenesis	1			Bacteroidaceae	map00680	Methane metabolism	17
Catabacteriaceae	map00020	Citrate cycle (TCA cycle)	1			Bacteroidaceae	map00710	Carbon fixation in photosynthetic organisms	13
Catabacteriaceae	map00260	Glycine, serine and threonine metabolism	1			Bacteroidaceae	map00720	Carbon fixation pathways in prokaryotes	7
Catabacteriaceae	map00280	Valine, leucine and isoleucine degradation	1			Bacteroidaceae	map00750	Vitamin B6 metabolism	2
Catabacteriaceae	map00620	Pyruvate metabolism	1			Bacteroidaceae	map00770	Pantothenate and CoA biosynthesis	2
Catabacteriaceae	map00630	Glyoxylate and dicarboxylate metabolism	1			Bacteroidaceae	map00910	Nitrogen metabolism	2
Catabacteriaceae	map00640	Propanoate metabolism	1			Bacteroidaceae	map00940	Phenylpropanoid biosynthesis	1
Catabacteriaceae	map01100	Metabolic pathways	1			Bacteroidaceae	map00970	Aminoacyl-tRNA biosynthesis	1
Catabacteriaceae	map01110	Biosynthesis of secondary metabolites	1			Bacteroidaceae	map01100	Metabolic pathways	41
Catabacteriaceae	map01120	Microbial metabolism in diverse environments	1			Bacteroidaceae	map01110	Biosynthesis of secondary metabolites	25
Catabacteriaceae	map01130		1			Bacteroidaceae	map01120	Microbial metabolism in diverse environments	34
Catabacteriaceae	map01200	Carbon metabolism	1			Bacteroidaceae	map01130		26
Chitinispirillaceae	map00010	Glycolysis / Gluconeogenesis	1			Bacteroidaceae	map01200	Carbon metabolism	31
Chitinispirillaceae	map00710	Carbon fixation in photosynthetic organisms	1			Bacteroidaceae	map01210	2-Oxocarboxylic acid metabolism	2
Chitinispirillaceae	map01100	Metabolic pathways	1			Bacteroidaceae	map01220	Degradation of aromatic compounds	1
Chitinispirillaceae	map01110	Biosynthesis of secondary metabolites	1			Bacteroidaceae	map01230	Biosynthesis of amino acids	20
Chitinispirillaceae	map01120	Microbial metabolism in diverse environments	1			Bacteroidaceae	map02024	Quorum sensing	1
Chitinispirillaceae	map01130		1			Bacteroidaceae	map03010	Ribosome	21
Chitinispirillaceae	map01200	Carbon metabolism	1			Bacteroidaceae	map03018	RNA degradation	15
Chitinispirillaceae	map01230	Biosynthesis of amino acids	1			Bacteroidaceae	map03060	Protein export	1
Chitinispirillaceae	map04066	HIF-1 signaling pathway	1			Bacteroidaceae	map03070	Bacterial secretion system	1
Chitinispirillaceae	map05010	Alzheimer disease	1			Bacteroidaceae	map04066	HIF-1 signaling pathway	14
Clostridiaceae	map00010	Glycolysis / Gluconeogenesis	73			Bacteroidaceae	map04212	Longevity regulating pathway - worm	2
Clostridiaceae	map00020	Citrate cycle (TCA cycle)	20			Bacteroidaceae	map04940	Type I diabetes mellitus	2
Clostridiaceae	map00030	Pentose phosphate pathway	13			Bacteroidaceae	map05010	Alzheimer disease	1
Clostridiaceae	map00051	Fructose and mannose metabolism	16			Bacteroidaceae	map05134	Legionellosis	2
Clostridiaceae	map00052	Galactose metabolism	8			Bacteroidaceae	map05152	Tuberculosis	2
Clostridiaceae	map00061	Fatty acid biosynthesis	2			Bovidae	map00680	Methane metabolism	1
Clostridiaceae	map00071	Fatty acid degradation	24			Bovidae	map00720	Carbon fixation pathways in prokaryotes	1
Clostridiaceae	map00072		10			Bovidae	map01120	Microbial metabolism in diverse environments	1
Clostridiaceae	map00220	Arginine biosynthesis	9			Bovidae	map01200	Carbon metabolism	1
Clostridiaceae	map00230	Purine metabolism	9			Brachyspiraceae	map00561	Glycerolipid metabolism	1
Clostridiaceae	map00250	Alanine, aspartate and glutamate metabolism	8			Brachyspiraceae	map00640	Propanoate metabolism	1
Clostridiaceae	map00280	Valine, leucine and isoleucine degradation	18			Brucellaceae	map00030	Pentose phosphate pathway	1
Clostridiaceae	map00290	Valine, leucine and isoleucine biosynthesis	2			Brucellaceae	map00630	Glyoxylate and dicarboxylate metabolism	1
Clostridiaceae	map00300	Lysine biosynthesis	1			Brucellaceae	map01100	Metabolic pathways	1
Clostridiaceae	map00310	Lysine degradation	12			Brucellaceae	map01120	Microbial metabolism in diverse environments	1
Clostridiaceae	map00330	Arginine and proline metabolism	1			Brucellaceae	map01200	Carbon metabolism	1
Clostridiaceae	map00350	Tyrosine metabolism	4			Burkholderiaceae	map00623	Toluene degradation	1
Clostridiaceae	map00360	Phenylalanine metabolism	1			Burkholderiaceae	map00640	Propanoate metabolism	1
Clostridiaceae	map00362	Benzoate degradation	29			Burkholderiaceae	map00670	One carbon pool by folate	1
Clostridiaceae	map00380	Tryptophan metabolism	11			Burkholderiaceae	map00720	Carbon fixation pathways in prokaryotes	2
Clostridiaceae	map00430	Taurine and hypotaurine metabolism	10			Burkholderiaceae	map01100	Metabolic pathways	2
Clostridiaceae	map00450	Selenocompound metabolism	1			Burkholderiaceae	map01120	Microbial metabolism in diverse environments	3
Clostridiaceae	map00460	Cyanoamino acid metabolism	1			Burkholderiaceae	map01200	Carbon metabolism	2
Clostridiaceae	map00471		8			Burkholderiaceae	map01220	Degradation of aromatic compounds	1
Clostridiaceae	map00500	Starch and sucrose metabolism	20			Burkholderiaceae	map02020	Two-component system	1
Clostridiaceae	map00520	Amino sugar and nucleotide sugar metabolism	19			Burkholderiaceae	map02040	Flagellar assembly	1
Clostridiaceae	map00521	Streptomycin biosynthesis	6			Burkholderiaceae	map03010	Ribosome	1
Clostridiaceae	map00562	Inositol phosphate metabolism	21			Burkholderiaceae	map04621	NOD-like receptor signaling pathway	1
Clostridiaceae	map00620	Pyruvate metabolism	81			Burkholderiaceae	map04626	Plant-pathogen interaction	1
Clostridiaceae	map00625	Chloroalkane and chloroalkene degradation	4			Burkholderiaceae	map05132	Salmonella infection	1
Clostridiaceae	map00626	Naphthalene degradation	4			Burkholderiaceae	map05134	Legionellosis	1
Clostridiaceae	map00630	Glyoxylate and dicarboxylate metabolism	16			Campylobacteraceae	map00010	Glycolysis / Gluconeogenesis	1
Clostridiaceae	map00640	Propanoate metabolism	57			Campylobacteraceae	map00020	Citrate cycle (TCA cycle)	1
Clostridiaceae	map00643	Styrene degradation	32			Campylobacteraceae	map00620	Pyruvate metabolism	1
Clostridiaceae	map00650	Butanoate metabolism	42			Campylobacteraceae	map00650	Butanoate metabolism	1
Clostridiaceae	map00680	Methane metabolism	19			Campylobacteraceae	map00720	Carbon fixation pathways in prokaryotes	1
Clostridiaceae	map00710	Carbon fixation in photosynthetic organisms	57			Campylobacteraceae	map01100	Metabolic pathways	1
Clostridiaceae	map00720	Carbon fixation pathways in prokaryotes	59			Campylobacteraceae	map01120	Microbial metabolism in diverse environments	1
Clostridiaceae	map00730	Thiamine metabolism	3			Campylobacteraceae	map01130		1
Clostridiaceae	map00770	Pantothenate and CoA biosynthesis	2			Campylobacteraceae	map01200	Carbon metabolism	1
Clostridiaceae	map00900	Terpenoid backbone biosynthesis	13			Campylobacteraceae	map03018	RNA degradation	1
Clostridiaceae	map00910	Nitrogen metabolism	9			Campylobacteraceae	map04212	Longevity regulating pathway - worm	1
Clostridiaceae	map00920	Sulfur metabolism	3			Campylobacteraceae	map04940	Type I diabetes mellitus	1
Clostridiaceae	map00940	Phenylpropanoid biosynthesis	1			Campylobacteraceae	map05134	Legionellosis	1
Clostridiaceae	map01051	Biosynthesis of ansamycins	2			Campylobacteraceae	map05152	Tuberculosis	1
Clostridiaceae	map01100	Metabolic pathways	207			Candidatus Desulfofervidaceae	map03010	Ribosome	1
Clostridiaceae	map01110	Biosynthesis of secondary metabolites	96			Cardiobacteriaceae	map00010	Glycolysis / Gluconeogenesis	1
Clostridiaceae	map01120	Microbial metabolism in diverse environments	185			Cardiobacteriaceae	map00051	Fructose and mannose metabolism	1
Clostridiaceae	map01130		94			Cardiobacteriaceae	map00562	Inositol phosphate metabolism	1
Clostridiaceae	map01200	Carbon metabolism	124			Cardiobacteriaceae	map00710	Carbon fixation in photosynthetic organisms	1
Clostridiaceae	map01210	2-Oxocarboxylic acid metabolism	3			Cardiobacteriaceae	map01100	Metabolic pathways	1
Clostridiaceae	map01212	Fatty acid metabolism	20			Cardiobacteriaceae	map01110	Biosynthesis of secondary metabolites	1
Clostridiaceae	map01220	Degradation of aromatic compounds	22			Cardiobacteriaceae	map01120	Microbial metabolism in diverse environments	1
Clostridiaceae	map01230	Biosynthesis of amino acids	44			Cardiobacteriaceae	map01130		1
Clostridiaceae	map02010	ABC transporters	23			Cardiobacteriaceae	map01200	Carbon metabolism	1
Clostridiaceae	map02020	Two-component system	32			Cardiobacteriaceae	map01230	Biosynthesis of amino acids	1
Clostridiaceae	map02024	Quorum sensing	2			Carnobacteriaceae	map00071	Fatty acid degradation	1
Clostridiaceae	map02026	Biofilm formation - Escherichia coli	10			Carnobacteriaceae	map00072		1
Clostridiaceae	map02030	Bacterial chemotaxis	7			Carnobacteriaceae	map00280	Valine, leucine and isoleucine degradation	1
Clostridiaceae	map02040	Flagellar assembly	22			Carnobacteriaceae	map00310	Lysine degradation	1
Clostridiaceae	map02060	Phosphotransferase system (PTS)	1			Carnobacteriaceae	map00362	Benzoate degradation	1
Clostridiaceae	map03010	Ribosome	29			Carnobacteriaceae	map00380	Tryptophan metabolism	1
Clostridiaceae	map03018	RNA degradation	14			Carnobacteriaceae	map00620	Pyruvate metabolism	1
Clostridiaceae	map03320	PPAR signaling pathway	5			Carnobacteriaceae	map00630	Glyoxylate and dicarboxylate metabolism	1
Clostridiaceae	map04066	HIF-1 signaling pathway	33			Carnobacteriaceae	map00640	Propanoate metabolism	1
Clostridiaceae	map04068	FoxO signaling pathway	3			Carnobacteriaceae	map00650	Butanoate metabolism	1
Clostridiaceae	map04146	Peroxisome	2			Carnobacteriaceae	map00720	Carbon fixation pathways in prokaryotes	1
Clostridiaceae	map04151	PI3K-Akt signaling pathway	3			Carnobacteriaceae	map00900	Terpenoid backbone biosynthesis	1
Clostridiaceae	map04152	AMPK signaling pathway	3			Carnobacteriaceae	map01100	Metabolic pathways	1
Clostridiaceae	map04212	Longevity regulating pathway - worm	8			Carnobacteriaceae	map01110	Biosynthesis of secondary metabolites	1
Clostridiaceae	map04216	Ferroptosis	2			Carnobacteriaceae	map01120	Microbial metabolism in diverse environments	1
Clostridiaceae	map04217	Necroptosis	8			Carnobacteriaceae	map01130		1
Clostridiaceae	map04621	NOD-like receptor signaling pathway	22			Carnobacteriaceae	map01200	Carbon metabolism	1
Clostridiaceae	map04626	Plant-pathogen interaction	22			Carnobacteriaceae	map01212	Fatty acid metabolism	1
Clostridiaceae	map04714	Thermogenesis	2			Carnobacteriaceae	map02020	Two-component system	1
Clostridiaceae	map04910	Insulin signaling pathway	3			Catabacteriaceae	map02040	Flagellar assembly	1
Clostridiaceae	map04920	Adipocytokine signaling pathway	5			Caulobacteraceae	map03010	Ribosome	4
Clostridiaceae	map04922	Glucagon signaling pathway	3			Chitinispirillaceae	map00010	Glycolysis / Gluconeogenesis	1
Clostridiaceae	map04931	Insulin resistance	3			Chitinispirillaceae	map00710	Carbon fixation in photosynthetic organisms	1
Clostridiaceae	map04940	Type I diabetes mellitus	8			Chitinispirillaceae	map01100	Metabolic pathways	1
Clostridiaceae	map04964	Proximal tubule bicarbonate reclamation	11			Chitinispirillaceae	map01110	Biosynthesis of secondary metabolites	1
Clostridiaceae	map05010	Alzheimer disease	27			Chitinispirillaceae	map01120	Microbial metabolism in diverse environments	1
Clostridiaceae	map05132	Salmonella infection	22			Chitinispirillaceae	map01130		1
Clostridiaceae	map05134	Legionellosis	30			Chitinispirillaceae	map01200	Carbon metabolism	1
Clostridiaceae	map05152	Tuberculosis	8			Chitinispirillaceae	map01230	Biosynthesis of amino acids	1
Comamonadaceae	map02020	Two-component system	1			Chitinispirillaceae	map04066	HIF-1 signaling pathway	1
Comamonadaceae	map02040	Flagellar assembly	1			Chitinispirillaceae	map05010	Alzheimer disease	1
Comamonadaceae	map04621	NOD-like receptor signaling pathway	1			Chlamydiaceae	map00010	Glycolysis / Gluconeogenesis	1
Comamonadaceae	map04626	Plant-pathogen interaction	1			Chlamydiaceae	map00260	Glycine, serine and threonine metabolism	1
Comamonadaceae	map05132	Salmonella infection	1			Chlamydiaceae	map00680	Methane metabolism	1
Comamonadaceae	map05134	Legionellosis	1			Chlamydiaceae	map01100	Metabolic pathways	1
Culicidae	map02010	ABC transporters	2			Chlamydiaceae	map01110	Biosynthesis of secondary metabolites	1
Daphniidae	map03010	Ribosome	3			Chlamydiaceae	map01120	Microbial metabolism in diverse environments	1
Deferribacteraceae	map00010	Glycolysis / Gluconeogenesis	7			Chlamydiaceae	map01130		1
Deferribacteraceae	map00020	Citrate cycle (TCA cycle)	6			Chlamydiaceae	map01200	Carbon metabolism	1
Deferribacteraceae	map00051	Fructose and mannose metabolism	1			Chlamydiaceae	map01230	Biosynthesis of amino acids	1
Deferribacteraceae	map00190	Oxidative phosphorylation	3			Chlamydomonadaceae	map02020	Two-component system	1
Deferribacteraceae	map00195	Photosynthesis	1			Chlamydomonadaceae	map02040	Flagellar assembly	1
Deferribacteraceae	map00270	Cysteine and methionine metabolism	2			Chlamydomonadaceae	map04621	NOD-like receptor signaling pathway	1
Deferribacteraceae	map00280	Valine, leucine and isoleucine degradation	4			Chlamydomonadaceae	map04626	Plant-pathogen interaction	1
Deferribacteraceae	map00380	Tryptophan metabolism	2			Chlamydomonadaceae	map05132	Salmonella infection	1
Deferribacteraceae	map00562	Inositol phosphate metabolism	1			Chlamydomonadaceae	map05134	Legionellosis	1
Deferribacteraceae	map00620	Pyruvate metabolism	4			Clostridiaceae	map00010	Glycolysis / Gluconeogenesis	73
Deferribacteraceae	map00630	Glyoxylate and dicarboxylate metabolism	20			Clostridiaceae	map00020	Citrate cycle (TCA cycle)	18
Deferribacteraceae	map00640	Propanoate metabolism	4			Clostridiaceae	map00030	Pentose phosphate pathway	25
Deferribacteraceae	map00650	Butanoate metabolism	2			Clostridiaceae	map00040	Pentose and glucuronate interconversions	11
Deferribacteraceae	map00680	Methane metabolism	14			Clostridiaceae	map00051	Fructose and mannose metabolism	27
Deferribacteraceae	map00710	Carbon fixation in photosynthetic organisms	9			Clostridiaceae	map00052	Galactose metabolism	16
Deferribacteraceae	map00720	Carbon fixation pathways in prokaryotes	6			Clostridiaceae	map00061	Fatty acid biosynthesis	2
Deferribacteraceae	map01100	Metabolic pathways	28			Clostridiaceae	map00071	Fatty acid degradation	20
Deferribacteraceae	map01110	Biosynthesis of secondary metabolites	13			Clostridiaceae	map00072		7
Deferribacteraceae	map01120	Microbial metabolism in diverse environments	27			Clostridiaceae	map00190	Oxidative phosphorylation	11
Deferribacteraceae	map01130		15			Clostridiaceae	map00195	Photosynthesis	2
Deferribacteraceae	map01200	Carbon metabolism	29			Clostridiaceae	map00220	Arginine biosynthesis	16
Deferribacteraceae	map01230	Biosynthesis of amino acids	5			Clostridiaceae	map00230	Purine metabolism	20
Deferribacteraceae	map02010	ABC transporters	1			Clostridiaceae	map00250	Alanine, aspartate and glutamate metabolism	10
Deferribacteraceae	map02020	Two-component system	10			Clostridiaceae	map00270	Cysteine and methionine metabolism	1
Deferribacteraceae	map02040	Flagellar assembly	10			Clostridiaceae	map00280	Valine, leucine and isoleucine degradation	18
Deferribacteraceae	map03010	Ribosome	2			Clostridiaceae	map00290	Valine, leucine and isoleucine biosynthesis	7
Deferribacteraceae	map03018	RNA degradation	1			Clostridiaceae	map00300	Lysine biosynthesis	6
Deferribacteraceae	map04011	MAPK signaling pathway - yeast	2			Clostridiaceae	map00310	Lysine degradation	9
Deferribacteraceae	map04016	MAPK signaling pathway - plant	2			Clostridiaceae	map00330	Arginine and proline metabolism	6
Deferribacteraceae	map04066	HIF-1 signaling pathway	4			Clostridiaceae	map00340	Histidine metabolism	1
Deferribacteraceae	map04068	FoxO signaling pathway	2			Clostridiaceae	map00360	Phenylalanine metabolism	9
Deferribacteraceae	map04146	Peroxisome	2			Clostridiaceae	map00362	Benzoate degradation	35
Deferribacteraceae	map04211	Longevity regulating pathway	2			Clostridiaceae	map00380	Tryptophan metabolism	7
Deferribacteraceae	map04212	Longevity regulating pathway - worm	3			Clostridiaceae	map00430	Taurine and hypotaurine metabolism	10
Deferribacteraceae	map04213	Longevity regulating pathway - multiple species	2			Clostridiaceae	map00460	Cyanoamino acid metabolism	2
Deferribacteraceae	map04621	NOD-like receptor signaling pathway	10			Clostridiaceae	map00471		10
Deferribacteraceae	map04626	Plant-pathogen interaction	10			Clostridiaceae	map00480	Glutathione metabolism	1
Deferribacteraceae	map04940	Type I diabetes mellitus	1			Clostridiaceae	map00500	Starch and sucrose metabolism	52
Deferribacteraceae	map05010	Alzheimer disease	4			Clostridiaceae	map00520	Amino sugar and nucleotide sugar metabolism	43
Deferribacteraceae	map05014	Amyotrophic lateral sclerosis	2			Clostridiaceae	map00521	Streptomycin biosynthesis	14
Deferribacteraceae	map05132	Salmonella infection	10			Clostridiaceae	map00561	Glycerolipid metabolism	1
Deferribacteraceae	map05134	Legionellosis	13			Clostridiaceae	map00562	Inositol phosphate metabolism	19
Deferribacteraceae	map05152	Tuberculosis	1			Clostridiaceae	map00620	Pyruvate metabolism	90
Desulfobacteraceae	map00720	Carbon fixation pathways in prokaryotes	3			Clostridiaceae	map00630	Glyoxylate and dicarboxylate metabolism	8
Desulfobacteraceae	map01120	Microbial metabolism in diverse environments	3			Clostridiaceae	map00640	Propanoate metabolism	57
Desulfobacteraceae	map01200	Carbon metabolism	3			Clostridiaceae	map00643	Styrene degradation	39
Desulfovibrionaceae	map00010	Glycolysis / Gluconeogenesis	6			Clostridiaceae	map00650	Butanoate metabolism	48
Desulfovibrionaceae	map00020	Citrate cycle (TCA cycle)	2			Clostridiaceae	map00670	One carbon pool by folate	5
Desulfovibrionaceae	map00030	Pentose phosphate pathway	3			Clostridiaceae	map00680	Methane metabolism	23
Desulfovibrionaceae	map00040	Pentose and glucuronate interconversions	1			Clostridiaceae	map00710	Carbon fixation in photosynthetic organisms	51
Desulfovibrionaceae	map00051	Fructose and mannose metabolism	3			Clostridiaceae	map00720	Carbon fixation pathways in prokaryotes	69
Desulfovibrionaceae	map00052	Galactose metabolism	1			Clostridiaceae	map00770	Pantothenate and CoA biosynthesis	7
Desulfovibrionaceae	map00230	Purine metabolism	3			Clostridiaceae	map00900	Terpenoid backbone biosynthesis	21
Desulfovibrionaceae	map00261	Monobactam biosynthesis	3			Clostridiaceae	map00910	Nitrogen metabolism	10
Desulfovibrionaceae	map00430	Taurine and hypotaurine metabolism	6			Clostridiaceae	map00920	Sulfur metabolism	3
Desulfovibrionaceae	map00450	Selenocompound metabolism	3			Clostridiaceae	map00940	Phenylpropanoid biosynthesis	2
Desulfovibrionaceae	map00500	Starch and sucrose metabolism	1			Clostridiaceae	map01051	Biosynthesis of ansamycins	1
Desulfovibrionaceae	map00520	Amino sugar and nucleotide sugar metabolism	1			Clostridiaceae	map01100	Metabolic pathways	291
Desulfovibrionaceae	map00620	Pyruvate metabolism	8			Clostridiaceae	map01110	Biosynthesis of secondary metabolites	137
Desulfovibrionaceae	map00633	Nitrotoluene degradation	1			Clostridiaceae	map01120	Microbial metabolism in diverse environments	219
Desulfovibrionaceae	map00640	Propanoate metabolism	5			Clostridiaceae	map01130		110
Desulfovibrionaceae	map00650	Butanoate metabolism	7			Clostridiaceae	map01200	Carbon metabolism	137
Desulfovibrionaceae	map00680	Methane metabolism	5			Clostridiaceae	map01210	2-Oxocarboxylic acid metabolism	14
Desulfovibrionaceae	map00710	Carbon fixation in photosynthetic organisms	3			Clostridiaceae	map01212	Fatty acid metabolism	20
Desulfovibrionaceae	map00720	Carbon fixation pathways in prokaryotes	3			Clostridiaceae	map01220	Degradation of aromatic compounds	17
Desulfovibrionaceae	map00760	Nicotinate and nicotinamide metabolism	3			Clostridiaceae	map01230	Biosynthesis of amino acids	53
Desulfovibrionaceae	map00920	Sulfur metabolism	5			Clostridiaceae	map01501	beta-Lactam resistance	1
Desulfovibrionaceae	map01100	Metabolic pathways	22			Clostridiaceae	map01523	Antifolate resistance	2
Desulfovibrionaceae	map01110	Biosynthesis of secondary metabolites	4			Clostridiaceae	map02010	ABC transporters	34
Desulfovibrionaceae	map01120	Microbial metabolism in diverse environments	17			Clostridiaceae	map02020	Two-component system	31
Desulfovibrionaceae	map01130		10			Clostridiaceae	map02024	Quorum sensing	6
Desulfovibrionaceae	map01200	Carbon metabolism	7			Clostridiaceae	map02026	Biofilm formation - Escherichia coli	29
Desulfovibrionaceae	map01230	Biosynthesis of amino acids	4			Clostridiaceae	map02030	Bacterial chemotaxis	14
Desulfovibrionaceae	map02010	ABC transporters	2			Clostridiaceae	map02040	Flagellar assembly	25
Desulfovibrionaceae	map02024	Quorum sensing	2			Clostridiaceae	map02060	Phosphotransferase system (PTS)	2
Desulfovibrionaceae	map03010	Ribosome	2			Clostridiaceae	map03010	Ribosome	70
Desulfovibrionaceae	map03018	RNA degradation	4			Clostridiaceae	map03018	RNA degradation	25
Desulfovibrionaceae	map04066	HIF-1 signaling pathway	1			Clostridiaceae	map03320	PPAR signaling pathway	2
Desulfovibrionaceae	map04212	Longevity regulating pathway - worm	3			Clostridiaceae	map04066	HIF-1 signaling pathway	23
Desulfovibrionaceae	map04940	Type I diabetes mellitus	3			Clostridiaceae	map04146	Peroxisome	3
Desulfovibrionaceae	map05134	Legionellosis	3			Clostridiaceae	map04212	Longevity regulating pathway - worm	20
Desulfovibrionaceae	map05152	Tuberculosis	3			Clostridiaceae	map04216	Ferroptosis	2
Dysgonomonadaceae	map03010	Ribosome	6			Clostridiaceae	map04217	Necroptosis	10
Ectothiorhodospiraceae	map03010	Ribosome	1			Clostridiaceae	map04621	NOD-like receptor signaling pathway	23
Eggerthellaceae	map00260	Glycine, serine and threonine metabolism	1			Clostridiaceae	map04626	Plant-pathogen interaction	23
Eggerthellaceae	map00330	Arginine and proline metabolism	1			Clostridiaceae	map04714	Thermogenesis	2
Eggerthellaceae	map01100	Metabolic pathways	1			Clostridiaceae	map04920	Adipocytokine signaling pathway	2
Enterococcaceae	map00430	Taurine and hypotaurine metabolism	1			Clostridiaceae	map04922	Glucagon signaling pathway	6
Erwiniaceae	map00190	Oxidative phosphorylation	1			Clostridiaceae	map04930	Type II diabetes mellitus	6
Erwiniaceae	map00195	Photosynthesis	1			Clostridiaceae	map04940	Type I diabetes mellitus	16
Erwiniaceae	map01100	Metabolic pathways	1			Clostridiaceae	map04964	Proximal tubule bicarbonate reclamation	10
Erysipelotrichaceae	map00010	Glycolysis / Gluconeogenesis	2			Clostridiaceae	map05010	Alzheimer disease	18
Erysipelotrichaceae	map00020	Citrate cycle (TCA cycle)	1			Clostridiaceae	map05132	Salmonella infection	23
Erysipelotrichaceae	map00460	Cyanoamino acid metabolism	1			Clostridiaceae	map05134	Legionellosis	40
Erysipelotrichaceae	map00500	Starch and sucrose metabolism	1			Clostridiaceae	map05152	Tuberculosis	20
Erysipelotrichaceae	map00620	Pyruvate metabolism	1			Clostridiaceae	map05165	Human papillomavirus infection	6
Erysipelotrichaceae	map00650	Butanoate metabolism	1			Clostridiaceae	map05203	Viral carcinogenesis	6
Erysipelotrichaceae	map00720	Carbon fixation pathways in prokaryotes	1			Clostridiaceae	map05230	Central carbon metabolism in cancer	6
Erysipelotrichaceae	map00940	Phenylpropanoid biosynthesis	1			Clostridiales Family XIII. Incertae Sedis	map03018	RNA degradation	1
Erysipelotrichaceae	map01100	Metabolic pathways	2			Clostridiales Family XIII. Incertae Sedis	map04212	Longevity regulating pathway - worm	1
Erysipelotrichaceae	map01110	Biosynthesis of secondary metabolites	1			Clostridiales Family XIII. Incertae Sedis	map04940	Type I diabetes mellitus	1
Erysipelotrichaceae	map01120	Microbial metabolism in diverse environments	1			Clostridiales Family XIII. Incertae Sedis	map05134	Legionellosis	1
Erysipelotrichaceae	map01130		1			Clostridiales Family XIII. Incertae Sedis	map05152	Tuberculosis	1
Erysipelotrichaceae	map01200	Carbon metabolism	1			Comamonadaceae	map02020	Two-component system	3
Eubacteriaceae	map00010	Glycolysis / Gluconeogenesis	21			Comamonadaceae	map02040	Flagellar assembly	3
Eubacteriaceae	map00020	Citrate cycle (TCA cycle)	11			Comamonadaceae	map04621	NOD-like receptor signaling pathway	3
Eubacteriaceae	map00030	Pentose phosphate pathway	5			Comamonadaceae	map04626	Plant-pathogen interaction	3
Eubacteriaceae	map00051	Fructose and mannose metabolism	4			Comamonadaceae	map05132	Salmonella infection	3
Eubacteriaceae	map00071	Fatty acid degradation	8			Comamonadaceae	map05134	Legionellosis	3
Eubacteriaceae	map00072		3			Cordycipitaceae	map00500	Starch and sucrose metabolism	1
Eubacteriaceae	map00220	Arginine biosynthesis	8			Cordycipitaceae	map00520	Amino sugar and nucleotide sugar metabolism	1
Eubacteriaceae	map00230	Purine metabolism	3			Cordycipitaceae	map01100	Metabolic pathways	1
Eubacteriaceae	map00240	Pyrimidine metabolism	2			Cordycipitaceae	map01110	Biosynthesis of secondary metabolites	1
Eubacteriaceae	map00250	Alanine, aspartate and glutamate metabolism	8			Cordycipitaceae	map02026	Biofilm formation - Escherichia coli	1
Eubacteriaceae	map00270	Cysteine and methionine metabolism	1			Coriobacteriaceae	map00720	Carbon fixation pathways in prokaryotes	1
Eubacteriaceae	map00280	Valine, leucine and isoleucine degradation	8			Coriobacteriaceae	map01120	Microbial metabolism in diverse environments	1
Eubacteriaceae	map00290	Valine, leucine and isoleucine biosynthesis	2			Coriobacteriaceae	map01200	Carbon metabolism	1
Eubacteriaceae	map00310	Lysine degradation	3			Criblamydiaceae	map00480	Glutathione metabolism	1
Eubacteriaceae	map00360	Phenylalanine metabolism	4			Criblamydiaceae	map01100	Metabolic pathways	1
Eubacteriaceae	map00362	Benzoate degradation	7			Cucurbitaceae	map03018	RNA degradation	1
Eubacteriaceae	map00380	Tryptophan metabolism	3			Cucurbitaceae	map04212	Longevity regulating pathway - worm	1
Eubacteriaceae	map00430	Taurine and hypotaurine metabolism	8			Cucurbitaceae	map04940	Type I diabetes mellitus	1
Eubacteriaceae	map00471		8			Cucurbitaceae	map05134	Legionellosis	1
Eubacteriaceae	map00500	Starch and sucrose metabolism	4			Cucurbitaceae	map05152	Tuberculosis	1
Eubacteriaceae	map00520	Amino sugar and nucleotide sugar metabolism	2			Culicidae	map01501	beta-Lactam resistance	1
Eubacteriaceae	map00562	Inositol phosphate metabolism	4			Culicidae	map02010	ABC transporters	1
Eubacteriaceae	map00620	Pyruvate metabolism	21			Culicidae	map02024	Quorum sensing	1
Eubacteriaceae	map00630	Glyoxylate and dicarboxylate metabolism	3			Danionidae	map02010	ABC transporters	1
Eubacteriaceae	map00640	Propanoate metabolism	3			Daphniidae	map03010	Ribosome	3
Eubacteriaceae	map00650	Butanoate metabolism	22			Deferribacteraceae	map00010	Glycolysis / Gluconeogenesis	23
Eubacteriaceae	map00710	Carbon fixation in photosynthetic organisms	18			Deferribacteraceae	map00020	Citrate cycle (TCA cycle)	16
Eubacteriaceae	map00720	Carbon fixation pathways in prokaryotes	20			Deferribacteraceae	map00030	Pentose phosphate pathway	6
Eubacteriaceae	map00730	Thiamine metabolism	3			Deferribacteraceae	map00051	Fructose and mannose metabolism	8
Eubacteriaceae	map00770	Pantothenate and CoA biosynthesis	2			Deferribacteraceae	map00052	Galactose metabolism	2
Eubacteriaceae	map00900	Terpenoid backbone biosynthesis	8			Deferribacteraceae	map00061	Fatty acid biosynthesis	3
Eubacteriaceae	map00910	Nitrogen metabolism	8			Deferribacteraceae	map00190	Oxidative phosphorylation	16
Eubacteriaceae	map00920	Sulfur metabolism	1			Deferribacteraceae	map00195	Photosynthesis	8
Eubacteriaceae	map01051	Biosynthesis of ansamycins	2			Deferribacteraceae	map00270	Cysteine and methionine metabolism	6
Eubacteriaceae	map01100	Metabolic pathways	66			Deferribacteraceae	map00280	Valine, leucine and isoleucine degradation	11
Eubacteriaceae	map01110	Biosynthesis of secondary metabolites	34			Deferribacteraceae	map00380	Tryptophan metabolism	4
Eubacteriaceae	map01120	Microbial metabolism in diverse environments	44			Deferribacteraceae	map00562	Inositol phosphate metabolism	2
Eubacteriaceae	map01130		37			Deferribacteraceae	map00620	Pyruvate metabolism	17
Eubacteriaceae	map01200	Carbon metabolism	47			Deferribacteraceae	map00630	Glyoxylate and dicarboxylate metabolism	37
Eubacteriaceae	map01210	2-Oxocarboxylic acid metabolism	2			Deferribacteraceae	map00633	Nitrotoluene degradation	8
Eubacteriaceae	map01212	Fatty acid metabolism	8			Deferribacteraceae	map00640	Propanoate metabolism	14
Eubacteriaceae	map01230	Biosynthesis of amino acids	13			Deferribacteraceae	map00650	Butanoate metabolism	5
Eubacteriaceae	map02010	ABC transporters	21			Deferribacteraceae	map00680	Methane metabolism	30
Eubacteriaceae	map02020	Two-component system	18			Deferribacteraceae	map00710	Carbon fixation in photosynthetic organisms	23
Eubacteriaceae	map02024	Quorum sensing	3			Deferribacteraceae	map00720	Carbon fixation pathways in prokaryotes	16
Eubacteriaceae	map02026	Biofilm formation - Escherichia coli	2			Deferribacteraceae	map00910	Nitrogen metabolism	5
Eubacteriaceae	map02030	Bacterial chemotaxis	12			Deferribacteraceae	map01100	Metabolic pathways	77
Eubacteriaceae	map02040	Flagellar assembly	3			Deferribacteraceae	map01110	Biosynthesis of secondary metabolites	39
Eubacteriaceae	map03010	Ribosome	46			Deferribacteraceae	map01120	Microbial metabolism in diverse environments	77
Eubacteriaceae	map03018	RNA degradation	10			Deferribacteraceae	map01130		46
Eubacteriaceae	map04066	HIF-1 signaling pathway	4			Deferribacteraceae	map01200	Carbon metabolism	68
Eubacteriaceae	map04212	Longevity regulating pathway - worm	10			Deferribacteraceae	map01212	Fatty acid metabolism	3
Eubacteriaceae	map04217	Necroptosis	10			Deferribacteraceae	map01230	Biosynthesis of amino acids	16
Eubacteriaceae	map04621	NOD-like receptor signaling pathway	3			Deferribacteraceae	map02010	ABC transporters	5
Eubacteriaceae	map04626	Plant-pathogen interaction	3			Deferribacteraceae	map02020	Two-component system	37
Eubacteriaceae	map04910	Insulin signaling pathway	2			Deferribacteraceae	map02024	Quorum sensing	3
Eubacteriaceae	map04922	Glucagon signaling pathway	2			Deferribacteraceae	map02040	Flagellar assembly	34
Eubacteriaceae	map04931	Insulin resistance	2			Deferribacteraceae	map03010	Ribosome	4
Eubacteriaceae	map04940	Type I diabetes mellitus	6			Deferribacteraceae	map03018	RNA degradation	15
Eubacteriaceae	map04964	Proximal tubule bicarbonate reclamation	8			Deferribacteraceae	map04011	MAPK signaling pathway - yeast	4
Eubacteriaceae	map05010	Alzheimer disease	4			Deferribacteraceae	map04016	MAPK signaling pathway - plant	4
Eubacteriaceae	map05132	Salmonella infection	3			Deferribacteraceae	map04066	HIF-1 signaling pathway	8
Eubacteriaceae	map05134	Legionellosis	9			Deferribacteraceae	map04068	FoxO signaling pathway	4
Eubacteriaceae	map05152	Tuberculosis	10			Deferribacteraceae	map04146	Peroxisome	4
Flavobacteriaceae	map00010	Glycolysis / Gluconeogenesis	1			Deferribacteraceae	map04152	AMPK signaling pathway	2
Flavobacteriaceae	map00260	Glycine, serine and threonine metabolism	1			Deferribacteraceae	map04211	Longevity regulating pathway	4
Flavobacteriaceae	map00460	Cyanoamino acid metabolism	1			Deferribacteraceae	map04212	Longevity regulating pathway - worm	15
Flavobacteriaceae	map00630	Glyoxylate and dicarboxylate metabolism	1			Deferribacteraceae	map04213	Longevity regulating pathway - multiple species	4
Flavobacteriaceae	map00670	One carbon pool by folate	1			Deferribacteraceae	map04621	NOD-like receptor signaling pathway	34
Flavobacteriaceae	map00680	Methane metabolism	2			Deferribacteraceae	map04626	Plant-pathogen interaction	34
Flavobacteriaceae	map01100	Metabolic pathways	2			Deferribacteraceae	map04940	Type I diabetes mellitus	11
Flavobacteriaceae	map01110	Biosynthesis of secondary metabolites	2			Deferribacteraceae	map05010	Alzheimer disease	6
Flavobacteriaceae	map01120	Microbial metabolism in diverse environments	2			Deferribacteraceae	map05014	Amyotrophic lateral sclerosis	4
Flavobacteriaceae	map01130		2			Deferribacteraceae	map05132	Salmonella infection	34
Flavobacteriaceae	map01200	Carbon metabolism	2			Deferribacteraceae	map05134	Legionellosis	50
Flavobacteriaceae	map01230	Biosynthesis of amino acids	2			Deferribacteraceae	map05152	Tuberculosis	11
Flavobacteriaceae	map01523	Antifolate resistance	1			Deferribacteraceae	map05230	Central carbon metabolism in cancer	2
Flavobacteriaceae	map03018	RNA degradation	1			Desulfarculaceae	map00620	Pyruvate metabolism	1
Flavobacteriaceae	map04066	HIF-1 signaling pathway	1			Desulfarculaceae	map00710	Carbon fixation in photosynthetic organisms	1
Geobacteraceae	map02020	Two-component system	1			Desulfarculaceae	map00720	Carbon fixation pathways in prokaryotes	1
Geobacteraceae	map02040	Flagellar assembly	1			Desulfarculaceae	map01100	Metabolic pathways	1
Geobacteraceae	map04621	NOD-like receptor signaling pathway	1			Desulfarculaceae	map01120	Microbial metabolism in diverse environments	1
Geobacteraceae	map04626	Plant-pathogen interaction	1			Desulfarculaceae	map01200	Carbon metabolism	1
Geobacteraceae	map05132	Salmonella infection	1			Desulfobacteraceae	map00010	Glycolysis / Gluconeogenesis	1
Geobacteraceae	map05134	Legionellosis	1			Desulfobacteraceae	map00051	Fructose and mannose metabolism	1
Halobacteroidaceae	map00910	Nitrogen metabolism	1			Desulfobacteraceae	map00562	Inositol phosphate metabolism	1
Hungateiclostridiaceae	map00010	Glycolysis / Gluconeogenesis	2			Desulfobacteraceae	map00710	Carbon fixation in photosynthetic organisms	1
Hungateiclostridiaceae	map00040	Pentose and glucuronate interconversions	1			Desulfobacteraceae	map00720	Carbon fixation pathways in prokaryotes	2
Hungateiclostridiaceae	map00511	Other glycan degradation	4			Desulfobacteraceae	map01100	Metabolic pathways	1
Hungateiclostridiaceae	map00600	Sphingolipid metabolism	4			Desulfobacteraceae	map01110	Biosynthesis of secondary metabolites	1
Hungateiclostridiaceae	map00620	Pyruvate metabolism	2			Desulfobacteraceae	map01120	Microbial metabolism in diverse environments	3
Hungateiclostridiaceae	map00710	Carbon fixation in photosynthetic organisms	4			Desulfobacteraceae	map01130		1
Hungateiclostridiaceae	map00720	Carbon fixation pathways in prokaryotes	2			Desulfobacteraceae	map01200	Carbon metabolism	3
Hungateiclostridiaceae	map01100	Metabolic pathways	5			Desulfobacteraceae	map01230	Biosynthesis of amino acids	1
Hungateiclostridiaceae	map01110	Biosynthesis of secondary metabolites	2			Desulfobulbaceae	map04122	Sulfur relay system	1
Hungateiclostridiaceae	map01120	Microbial metabolism in diverse environments	4			Desulfovibrionaceae	map00010	Glycolysis / Gluconeogenesis	8
Hungateiclostridiaceae	map01130		2			Desulfovibrionaceae	map00020	Citrate cycle (TCA cycle)	3
Hungateiclostridiaceae	map01200	Carbon metabolism	4			Desulfovibrionaceae	map00030	Pentose phosphate pathway	3
Hungateiclostridiaceae	map01230	Biosynthesis of amino acids	2			Desulfovibrionaceae	map00040	Pentose and glucuronate interconversions	3
Hungateiclostridiaceae	map02010	ABC transporters	3			Desulfovibrionaceae	map00051	Fructose and mannose metabolism	3
Hungateiclostridiaceae	map02020	Two-component system	4			Desulfovibrionaceae	map00052	Galactose metabolism	3
Hungateiclostridiaceae	map02024	Quorum sensing	2			Desulfovibrionaceae	map00071	Fatty acid degradation	1
Hungateiclostridiaceae	map02040	Flagellar assembly	4			Desulfovibrionaceae	map00190	Oxidative phosphorylation	1
Hungateiclostridiaceae	map03010	Ribosome	2			Desulfovibrionaceae	map00195	Photosynthesis	1
Hungateiclostridiaceae	map04066	HIF-1 signaling pathway	2			Desulfovibrionaceae	map00230	Purine metabolism	6
Hungateiclostridiaceae	map04142	Lysosome	4			Desulfovibrionaceae	map00250	Alanine, aspartate and glutamate metabolism	1
Hungateiclostridiaceae	map04621	NOD-like receptor signaling pathway	4			Desulfovibrionaceae	map00261	Monobactam biosynthesis	6
Hungateiclostridiaceae	map04626	Plant-pathogen interaction	4			Desulfovibrionaceae	map00350	Tyrosine metabolism	1
Hungateiclostridiaceae	map05010	Alzheimer disease	2			Desulfovibrionaceae	map00430	Taurine and hypotaurine metabolism	4
Hungateiclostridiaceae	map05132	Salmonella infection	4			Desulfovibrionaceae	map00450	Selenocompound metabolism	6
Hungateiclostridiaceae	map05134	Legionellosis	4			Desulfovibrionaceae	map00500	Starch and sucrose metabolism	4
Hymenobacteraceae	map00260	Glycine, serine and threonine metabolism	1			Desulfovibrionaceae	map00520	Amino sugar and nucleotide sugar metabolism	3
Hymenobacteraceae	map00460	Cyanoamino acid metabolism	1			Desulfovibrionaceae	map00620	Pyruvate metabolism	8
Hymenobacteraceae	map00630	Glyoxylate and dicarboxylate metabolism	1			Desulfovibrionaceae	map00625	Chloroalkane and chloroalkene degradation	1
Hymenobacteraceae	map00670	One carbon pool by folate	1			Desulfovibrionaceae	map00626	Naphthalene degradation	1
Hymenobacteraceae	map00680	Methane metabolism	1			Desulfovibrionaceae	map00633	Nitrotoluene degradation	1
Hymenobacteraceae	map01100	Metabolic pathways	1			Desulfovibrionaceae	map00640	Propanoate metabolism	3
Hymenobacteraceae	map01110	Biosynthesis of secondary metabolites	1			Desulfovibrionaceae	map00650	Butanoate metabolism	6
Hymenobacteraceae	map01120	Microbial metabolism in diverse environments	1			Desulfovibrionaceae	map00680	Methane metabolism	5
Hymenobacteraceae	map01130		1			Desulfovibrionaceae	map00710	Carbon fixation in photosynthetic organisms	4
Hymenobacteraceae	map01200	Carbon metabolism	1			Desulfovibrionaceae	map00720	Carbon fixation pathways in prokaryotes	5
Hymenobacteraceae	map01230	Biosynthesis of amino acids	1			Desulfovibrionaceae	map00760	Nicotinate and nicotinamide metabolism	4
Hymenobacteraceae	map01523	Antifolate resistance	1			Desulfovibrionaceae	map00920	Sulfur metabolism	8
Hymenobacteraceae	map02020	Two-component system	1			Desulfovibrionaceae	map01100	Metabolic pathways	32
Hymenobacteraceae	map02040	Flagellar assembly	1			Desulfovibrionaceae	map01110	Biosynthesis of secondary metabolites	6
Hymenobacteraceae	map04621	NOD-like receptor signaling pathway	1			Desulfovibrionaceae	map01120	Microbial metabolism in diverse environments	21
Hymenobacteraceae	map04626	Plant-pathogen interaction	1			Desulfovibrionaceae	map01130		17
Hymenobacteraceae	map05132	Salmonella infection	1			Desulfovibrionaceae	map01200	Carbon metabolism	9
Hymenobacteraceae	map05134	Legionellosis	1			Desulfovibrionaceae	map01220	Degradation of aromatic compounds	1
Ktedonobacteraceae	map00010	Glycolysis / Gluconeogenesis	1			Desulfovibrionaceae	map01230	Biosynthesis of amino acids	4
Ktedonobacteraceae	map00051	Fructose and mannose metabolism	1			Desulfovibrionaceae	map02010	ABC transporters	1
Ktedonobacteraceae	map00562	Inositol phosphate metabolism	1			Desulfovibrionaceae	map02020	Two-component system	3
Ktedonobacteraceae	map00710	Carbon fixation in photosynthetic organisms	1			Desulfovibrionaceae	map02024	Quorum sensing	1
Ktedonobacteraceae	map01100	Metabolic pathways	1			Desulfovibrionaceae	map02026	Biofilm formation - Escherichia coli	1
Ktedonobacteraceae	map01110	Biosynthesis of secondary metabolites	1			Desulfovibrionaceae	map02030	Bacterial chemotaxis	1
Ktedonobacteraceae	map01120	Microbial metabolism in diverse environments	1			Desulfovibrionaceae	map02040	Flagellar assembly	1
Ktedonobacteraceae	map01130		1			Desulfovibrionaceae	map03010	Ribosome	10
Ktedonobacteraceae	map01200	Carbon metabolism	1			Desulfovibrionaceae	map03018	RNA degradation	6
Ktedonobacteraceae	map01230	Biosynthesis of amino acids	1			Desulfovibrionaceae	map04066	HIF-1 signaling pathway	1
Lachnospiraceae	map00010	Glycolysis / Gluconeogenesis	517			Desulfovibrionaceae	map04122	Sulfur relay system	1
Lachnospiraceae	map00020	Citrate cycle (TCA cycle)	274			Desulfovibrionaceae	map04212	Longevity regulating pathway - worm	6
Lachnospiraceae	map00030	Pentose phosphate pathway	102			Desulfovibrionaceae	map04217	Necroptosis	1
Lachnospiraceae	map00040	Pentose and glucuronate interconversions	44			Desulfovibrionaceae	map04621	NOD-like receptor signaling pathway	1
Lachnospiraceae	map00051	Fructose and mannose metabolism	154			Desulfovibrionaceae	map04626	Plant-pathogen interaction	1
Lachnospiraceae	map00052	Galactose metabolism	63			Desulfovibrionaceae	map04910	Insulin signaling pathway	1
Lachnospiraceae	map00053	Ascorbate and aldarate metabolism	14			Desulfovibrionaceae	map04922	Glucagon signaling pathway	1
Lachnospiraceae	map00061	Fatty acid biosynthesis	2			Desulfovibrionaceae	map04931	Insulin resistance	1
Lachnospiraceae	map00071	Fatty acid degradation	53			Desulfovibrionaceae	map04940	Type I diabetes mellitus	5
Lachnospiraceae	map00072		33			Desulfovibrionaceae	map05010	Alzheimer disease	1
Lachnospiraceae	map00190	Oxidative phosphorylation	27			Desulfovibrionaceae	map05132	Salmonella infection	1
Lachnospiraceae	map00195	Photosynthesis	20			Desulfovibrionaceae	map05134	Legionellosis	6
Lachnospiraceae	map00220	Arginine biosynthesis	8			Desulfovibrionaceae	map05152	Tuberculosis	6
Lachnospiraceae	map00230	Purine metabolism	43			Desulfurellaceae	map00010	Glycolysis / Gluconeogenesis	1
Lachnospiraceae	map00240	Pyrimidine metabolism	28			Desulfurellaceae	map00020	Citrate cycle (TCA cycle)	1
Lachnospiraceae	map00250	Alanine, aspartate and glutamate metabolism	12			Desulfurellaceae	map00620	Pyruvate metabolism	1
Lachnospiraceae	map00260	Glycine, serine and threonine metabolism	13			Desulfurellaceae	map00650	Butanoate metabolism	1
Lachnospiraceae	map00261	Monobactam biosynthesis	3			Desulfurellaceae	map00720	Carbon fixation pathways in prokaryotes	1
Lachnospiraceae	map00270	Cysteine and methionine metabolism	10			Desulfurellaceae	map01100	Metabolic pathways	1
Lachnospiraceae	map00280	Valine, leucine and isoleucine degradation	55			Desulfurellaceae	map01120	Microbial metabolism in diverse environments	1
Lachnospiraceae	map00290	Valine, leucine and isoleucine biosynthesis	18			Desulfurellaceae	map01130		1
Lachnospiraceae	map00300	Lysine biosynthesis	4			Desulfurellaceae	map01200	Carbon metabolism	1
Lachnospiraceae	map00310	Lysine degradation	33			Dysgonomonadaceae	map00500	Starch and sucrose metabolism	1
Lachnospiraceae	map00330	Arginine and proline metabolism	5			Dysgonomonadaceae	map01100	Metabolic pathways	1
Lachnospiraceae	map00340	Histidine metabolism	1			Dysgonomonadaceae	map01110	Biosynthesis of secondary metabolites	1
Lachnospiraceae	map00350	Tyrosine metabolism	1			Dysgonomonadaceae	map02026	Biofilm formation - Escherichia coli	1
Lachnospiraceae	map00360	Phenylalanine metabolism	20			Dysgonomonadaceae	map03010	Ribosome	1
Lachnospiraceae	map00362	Benzoate degradation	54			Dysgonomonadaceae	map04217	Necroptosis	1
Lachnospiraceae	map00380	Tryptophan metabolism	33			Dysgonomonadaceae	map04910	Insulin signaling pathway	1
Lachnospiraceae	map00400	Phenylalanine, tyrosine and tryptophan biosynthesis	2			Dysgonomonadaceae	map04922	Glucagon signaling pathway	1
Lachnospiraceae	map00430	Taurine and hypotaurine metabolism	1			Dysgonomonadaceae	map04931	Insulin resistance	1
Lachnospiraceae	map00450	Selenocompound metabolism	3			Ectothiorhodospiraceae	map03010	Ribosome	1
Lachnospiraceae	map00460	Cyanoamino acid metabolism	7			Eggerthellaceae	map00010	Glycolysis / Gluconeogenesis	1
Lachnospiraceae	map00471		8			Eggerthellaceae	map00020	Citrate cycle (TCA cycle)	1
Lachnospiraceae	map00480	Glutathione metabolism	1			Eggerthellaceae	map00260	Glycine, serine and threonine metabolism	1
Lachnospiraceae	map00500	Starch and sucrose metabolism	176			Eggerthellaceae	map00330	Arginine and proline metabolism	1
Lachnospiraceae	map00511	Other glycan degradation	10			Eggerthellaceae	map00620	Pyruvate metabolism	1
Lachnospiraceae	map00520	Amino sugar and nucleotide sugar metabolism	97			Eggerthellaceae	map00650	Butanoate metabolism	1
Lachnospiraceae	map00521	Streptomycin biosynthesis	18			Eggerthellaceae	map00720	Carbon fixation pathways in prokaryotes	1
Lachnospiraceae	map00523	Polyketide sugar unit biosynthesis	6			Eggerthellaceae	map01100	Metabolic pathways	2
Lachnospiraceae	map00524	Neomycin, kanamycin and gentamicin biosynthesis	1			Eggerthellaceae	map01120	Microbial metabolism in diverse environments	1
Lachnospiraceae	map00561	Glycerolipid metabolism	7			Eggerthellaceae	map01130		1
Lachnospiraceae	map00562	Inositol phosphate metabolism	90			Eggerthellaceae	map01200	Carbon metabolism	1
Lachnospiraceae	map00564	Glycerophospholipid metabolism	5			Enterobacteriaceae	map00680	Methane metabolism	1
Lachnospiraceae	map00600	Sphingolipid metabolism	8			Enterobacteriaceae	map00720	Carbon fixation pathways in prokaryotes	1
Lachnospiraceae	map00603	Glycosphingolipid biosynthesis - globo and isoglobo series	1			Enterobacteriaceae	map01120	Microbial metabolism in diverse environments	1
Lachnospiraceae	map00620	Pyruvate metabolism	733			Enterobacteriaceae	map01200	Carbon metabolism	1
Lachnospiraceae	map00630	Glyoxylate and dicarboxylate metabolism	57			Enterococcaceae	map00010	Glycolysis / Gluconeogenesis	1
Lachnospiraceae	map00633	Nitrotoluene degradation	4			Enterococcaceae	map00020	Citrate cycle (TCA cycle)	1
Lachnospiraceae	map00640	Propanoate metabolism	389			Enterococcaceae	map00430	Taurine and hypotaurine metabolism	1
Lachnospiraceae	map00643	Styrene degradation	1			Enterococcaceae	map00511	Other glycan degradation	1
Lachnospiraceae	map00650	Butanoate metabolism	494			Enterococcaceae	map00620	Pyruvate metabolism	1
Lachnospiraceae	map00670	One carbon pool by folate	7			Enterococcaceae	map00650	Butanoate metabolism	1
Lachnospiraceae	map00680	Methane metabolism	76			Enterococcaceae	map00720	Carbon fixation pathways in prokaryotes	1
Lachnospiraceae	map00710	Carbon fixation in photosynthetic organisms	472			Enterococcaceae	map01100	Metabolic pathways	1
Lachnospiraceae	map00720	Carbon fixation pathways in prokaryotes	116			Enterococcaceae	map01120	Microbial metabolism in diverse environments	1
Lachnospiraceae	map00730	Thiamine metabolism	1			Enterococcaceae	map01130		1
Lachnospiraceae	map00750	Vitamin B6 metabolism	1			Enterococcaceae	map01200	Carbon metabolism	1
Lachnospiraceae	map00760	Nicotinate and nicotinamide metabolism	5			Erwiniaceae	map02020	Two-component system	1
Lachnospiraceae	map00770	Pantothenate and CoA biosynthesis	18			Erwiniaceae	map02040	Flagellar assembly	1
Lachnospiraceae	map00780	Biotin metabolism	2			Erwiniaceae	map04621	NOD-like receptor signaling pathway	1
Lachnospiraceae	map00790	Folate biosynthesis	2			Erwiniaceae	map04626	Plant-pathogen interaction	1
Lachnospiraceae	map00900	Terpenoid backbone biosynthesis	59			Erwiniaceae	map05132	Salmonella infection	1
Lachnospiraceae	map00910	Nitrogen metabolism	11			Erwiniaceae	map05134	Legionellosis	1
Lachnospiraceae	map00920	Sulfur metabolism	3			Erysipelotrichaceae	map00010	Glycolysis / Gluconeogenesis	1
Lachnospiraceae	map00940	Phenylpropanoid biosynthesis	5			Erysipelotrichaceae	map00020	Citrate cycle (TCA cycle)	1
Lachnospiraceae	map00970	Aminoacyl-tRNA biosynthesis	6			Erysipelotrichaceae	map00620	Pyruvate metabolism	3
Lachnospiraceae	map01051	Biosynthesis of ansamycins	10			Erysipelotrichaceae	map00710	Carbon fixation in photosynthetic organisms	3
Lachnospiraceae	map01100	Metabolic pathways	1432			Erysipelotrichaceae	map00720	Carbon fixation pathways in prokaryotes	2
Lachnospiraceae	map01110	Biosynthesis of secondary metabolites	770			Erysipelotrichaceae	map01100	Metabolic pathways	3
Lachnospiraceae	map01120	Microbial metabolism in diverse environments	1065			Erysipelotrichaceae	map01110	Biosynthesis of secondary metabolites	1
Lachnospiraceae	map01130		640			Erysipelotrichaceae	map01120	Microbial metabolism in diverse environments	3
Lachnospiraceae	map01200	Carbon metabolism	642			Erysipelotrichaceae	map01130		1
Lachnospiraceae	map01210	2-Oxocarboxylic acid metabolism	25			Erysipelotrichaceae	map01200	Carbon metabolism	3
Lachnospiraceae	map01212	Fatty acid metabolism	55			Erythrobacteraceae	map03018	RNA degradation	2
Lachnospiraceae	map01220	Degradation of aromatic compounds	1			Erythrobacteraceae	map04212	Longevity regulating pathway - worm	2
Lachnospiraceae	map01230	Biosynthesis of amino acids	240			Erythrobacteraceae	map04940	Type I diabetes mellitus	2
Lachnospiraceae	map01501	beta-Lactam resistance	32			Erythrobacteraceae	map05134	Legionellosis	2
Lachnospiraceae	map01523	Antifolate resistance	3			Erythrobacteraceae	map05152	Tuberculosis	2
Lachnospiraceae	map02010	ABC transporters	308			Eubacteriaceae	map00010	Glycolysis / Gluconeogenesis	17
Lachnospiraceae	map02020	Two-component system	372			Eubacteriaceae	map00020	Citrate cycle (TCA cycle)	10
Lachnospiraceae	map02024	Quorum sensing	82			Eubacteriaceae	map00030	Pentose phosphate pathway	7
Lachnospiraceae	map02026	Biofilm formation - Escherichia coli	109			Eubacteriaceae	map00051	Fructose and mannose metabolism	5
Lachnospiraceae	map02030	Bacterial chemotaxis	125			Eubacteriaceae	map00052	Galactose metabolism	2
Lachnospiraceae	map02040	Flagellar assembly	267			Eubacteriaceae	map00071	Fatty acid degradation	8
Lachnospiraceae	map02060	Phosphotransferase system (PTS)	4			Eubacteriaceae	map00072		2
Lachnospiraceae	map03010	Ribosome	277			Eubacteriaceae	map00190	Oxidative phosphorylation	1
Lachnospiraceae	map03018	RNA degradation	67			Eubacteriaceae	map00230	Purine metabolism	1
Lachnospiraceae	map03020	RNA polymerase	21			Eubacteriaceae	map00240	Pyrimidine metabolism	3
Lachnospiraceae	map03030	DNA replication	8			Eubacteriaceae	map00260	Glycine, serine and threonine metabolism	1
Lachnospiraceae	map03060	Protein export	1			Eubacteriaceae	map00270	Cysteine and methionine metabolism	2
Lachnospiraceae	map03070	Bacterial secretion system	1			Eubacteriaceae	map00280	Valine, leucine and isoleucine degradation	8
Lachnospiraceae	map03320	PPAR signaling pathway	3			Eubacteriaceae	map00290	Valine, leucine and isoleucine biosynthesis	2
Lachnospiraceae	map03430	Mismatch repair	8			Eubacteriaceae	map00310	Lysine degradation	2
Lachnospiraceae	map03440	Homologous recombination	8			Eubacteriaceae	map00360	Phenylalanine metabolism	4
Lachnospiraceae	map04066	HIF-1 signaling pathway	71			Eubacteriaceae	map00362	Benzoate degradation	6
Lachnospiraceae	map04112	Cell cycle - Caulobacter	6			Eubacteriaceae	map00380	Tryptophan metabolism	2
Lachnospiraceae	map04141	Protein processing in endoplasmic reticulum	6			Eubacteriaceae	map00460	Cyanoamino acid metabolism	2
Lachnospiraceae	map04142	Lysosome	2			Eubacteriaceae	map00500	Starch and sucrose metabolism	8
Lachnospiraceae	map04146	Peroxisome	1			Eubacteriaceae	map00520	Amino sugar and nucleotide sugar metabolism	1
Lachnospiraceae	map04151	PI3K-Akt signaling pathway	6			Eubacteriaceae	map00561	Glycerolipid metabolism	4
Lachnospiraceae	map04152	AMPK signaling pathway	5			Eubacteriaceae	map00562	Inositol phosphate metabolism	3
Lachnospiraceae	map04212	Longevity regulating pathway - worm	68			Eubacteriaceae	map00600	Sphingolipid metabolism	2
Lachnospiraceae	map04217	Necroptosis	63			Eubacteriaceae	map00603	Glycosphingolipid biosynthesis - globo and isoglobo series	2
Lachnospiraceae	map04612	Antigen processing and presentation	6			Eubacteriaceae	map00620	Pyruvate metabolism	21
Lachnospiraceae	map04621	NOD-like receptor signaling pathway	261			Eubacteriaceae	map00630	Glyoxylate and dicarboxylate metabolism	2
Lachnospiraceae	map04626	Plant-pathogen interaction	264			Eubacteriaceae	map00640	Propanoate metabolism	3
Lachnospiraceae	map04657	IL-17 signaling pathway	6			Eubacteriaceae	map00650	Butanoate metabolism	21
Lachnospiraceae	map04659	Th17 cell differentiation	6			Eubacteriaceae	map00680	Methane metabolism	2
Lachnospiraceae	map04910	Insulin signaling pathway	49			Eubacteriaceae	map00710	Carbon fixation in photosynthetic organisms	19
Lachnospiraceae	map04914	Progesterone-mediated oocyte maturation	6			Eubacteriaceae	map00720	Carbon fixation pathways in prokaryotes	20
Lachnospiraceae	map04915	Estrogen signaling pathway	6			Eubacteriaceae	map00750	Vitamin B6 metabolism	1
Lachnospiraceae	map04917	Prolactin signaling pathway	1			Eubacteriaceae	map00770	Pantothenate and CoA biosynthesis	2
Lachnospiraceae	map04922	Glucagon signaling pathway	52			Eubacteriaceae	map00900	Terpenoid backbone biosynthesis	11
Lachnospiraceae	map04931	Insulin resistance	49			Eubacteriaceae	map00940	Phenylpropanoid biosynthesis	2
Lachnospiraceae	map04940	Type I diabetes mellitus	43			Eubacteriaceae	map01051	Biosynthesis of ansamycins	2
Lachnospiraceae	map04964	Proximal tubule bicarbonate reclamation	8			Eubacteriaceae	map01100	Metabolic pathways	71
Lachnospiraceae	map05010	Alzheimer disease	71			Eubacteriaceae	map01110	Biosynthesis of secondary metabolites	39
Lachnospiraceae	map05132	Salmonella infection	255			Eubacteriaceae	map01120	Microbial metabolism in diverse environments	46
Lachnospiraceae	map05134	Legionellosis	299			Eubacteriaceae	map01130		36
Lachnospiraceae	map05152	Tuberculosis	62			Eubacteriaceae	map01200	Carbon metabolism	41
Lachnospiraceae	map05200	Pathways in cancer	6			Eubacteriaceae	map01210	2-Oxocarboxylic acid metabolism	2
Lachnospiraceae	map05215	Prostate cancer	6			Eubacteriaceae	map01212	Fatty acid metabolism	8
Lachnospiraceae	map05230	Central carbon metabolism in cancer	5			Eubacteriaceae	map01230	Biosynthesis of amino acids	14
Lachnospiraceae	map05418	Fluid shear stress and atherosclerosis	6			Eubacteriaceae	map02010	ABC transporters	19
Lactobacillaceae	map00010	Glycolysis / Gluconeogenesis	60			Eubacteriaceae	map02020	Two-component system	10
Lactobacillaceae	map00020	Citrate cycle (TCA cycle)	1			Eubacteriaceae	map02024	Quorum sensing	9
Lactobacillaceae	map00030	Pentose phosphate pathway	6			Eubacteriaceae	map02026	Biofilm formation - Escherichia coli	5
Lactobacillaceae	map00051	Fructose and mannose metabolism	6			Eubacteriaceae	map02030	Bacterial chemotaxis	7
Lactobacillaceae	map00230	Purine metabolism	17			Eubacteriaceae	map02040	Flagellar assembly	5
Lactobacillaceae	map00260	Glycine, serine and threonine metabolism	2			Eubacteriaceae	map03010	Ribosome	50
Lactobacillaceae	map00270	Cysteine and methionine metabolism	7			Eubacteriaceae	map03018	RNA degradation	15
Lactobacillaceae	map00290	Valine, leucine and isoleucine biosynthesis	1			Eubacteriaceae	map03020	RNA polymerase	1
Lactobacillaceae	map00350	Tyrosine metabolism	1			Eubacteriaceae	map03320	PPAR signaling pathway	1
Lactobacillaceae	map00430	Taurine and hypotaurine metabolism	5			Eubacteriaceae	map04066	HIF-1 signaling pathway	3
Lactobacillaceae	map00480	Glutathione metabolism	1			Eubacteriaceae	map04212	Longevity regulating pathway - worm	15
Lactobacillaceae	map00562	Inositol phosphate metabolism	6			Eubacteriaceae	map04217	Necroptosis	4
Lactobacillaceae	map00620	Pyruvate metabolism	33			Eubacteriaceae	map04621	NOD-like receptor signaling pathway	1
Lactobacillaceae	map00630	Glyoxylate and dicarboxylate metabolism	1			Eubacteriaceae	map04626	Plant-pathogen interaction	2
Lactobacillaceae	map00640	Propanoate metabolism	14			Eubacteriaceae	map04910	Insulin signaling pathway	4
Lactobacillaceae	map00650	Butanoate metabolism	3			Eubacteriaceae	map04922	Glucagon signaling pathway	4
Lactobacillaceae	map00660	C5-Branched dibasic acid metabolism	1			Eubacteriaceae	map04931	Insulin resistance	4
Lactobacillaceae	map00680	Methane metabolism	21			Eubacteriaceae	map04940	Type I diabetes mellitus	8
Lactobacillaceae	map00710	Carbon fixation in photosynthetic organisms	24			Eubacteriaceae	map05010	Alzheimer disease	3
Lactobacillaceae	map00720	Carbon fixation pathways in prokaryotes	5			Eubacteriaceae	map05132	Salmonella infection	1
Lactobacillaceae	map00770	Pantothenate and CoA biosynthesis	1			Eubacteriaceae	map05134	Legionellosis	9
Lactobacillaceae	map01100	Metabolic pathways	72			Eubacteriaceae	map05152	Tuberculosis	15
Lactobacillaceae	map01110	Biosynthesis of secondary metabolites	62			Flavobacteriaceae	map00010	Glycolysis / Gluconeogenesis	3
Lactobacillaceae	map01120	Microbial metabolism in diverse environments	72			Flavobacteriaceae	map00260	Glycine, serine and threonine metabolism	1
Lactobacillaceae	map01130		62			Flavobacteriaceae	map00460	Cyanoamino acid metabolism	1
Lactobacillaceae	map01200	Carbon metabolism	59			Flavobacteriaceae	map00500	Starch and sucrose metabolism	2
Lactobacillaceae	map01210	2-Oxocarboxylic acid metabolism	1			Flavobacteriaceae	map00630	Glyoxylate and dicarboxylate metabolism	1
Lactobacillaceae	map01230	Biosynthesis of amino acids	53			Flavobacteriaceae	map00670	One carbon pool by folate	1
Lactobacillaceae	map02010	ABC transporters	16			Flavobacteriaceae	map00680	Methane metabolism	3
Lactobacillaceae	map03010	Ribosome	17			Flavobacteriaceae	map00710	Carbon fixation in photosynthetic organisms	1
Lactobacillaceae	map03018	RNA degradation	15			Flavobacteriaceae	map01100	Metabolic pathways	6
Lactobacillaceae	map04066	HIF-1 signaling pathway	27			Flavobacteriaceae	map01110	Biosynthesis of secondary metabolites	6
Lactobacillaceae	map04212	Longevity regulating pathway - worm	3			Flavobacteriaceae	map01120	Microbial metabolism in diverse environments	4
Lactobacillaceae	map04922	Glucagon signaling pathway	26			Flavobacteriaceae	map01130		4
Lactobacillaceae	map04930	Type II diabetes mellitus	17			Flavobacteriaceae	map01200	Carbon metabolism	4
Lactobacillaceae	map04940	Type I diabetes mellitus	3			Flavobacteriaceae	map01230	Biosynthesis of amino acids	4
Lactobacillaceae	map05010	Alzheimer disease	15			Flavobacteriaceae	map01523	Antifolate resistance	1
Lactobacillaceae	map05134	Legionellosis	3			Flavobacteriaceae	map02010	ABC transporters	1
Lactobacillaceae	map05152	Tuberculosis	3			Flavobacteriaceae	map02020	Two-component system	1
Lactobacillaceae	map05165	Human papillomavirus infection	17			Flavobacteriaceae	map02026	Biofilm formation - Escherichia coli	2
Lactobacillaceae	map05203	Viral carcinogenesis	17			Flavobacteriaceae	map02030	Bacterial chemotaxis	1
Lactobacillaceae	map05230	Central carbon metabolism in cancer	19			Flavobacteriaceae	map02040	Flagellar assembly	1
Leptospiraceae	map00310	Lysine degradation	1			Flavobacteriaceae	map03018	RNA degradation	2
Leuconostocaceae	map00010	Glycolysis / Gluconeogenesis	1			Flavobacteriaceae	map04066	HIF-1 signaling pathway	2
Leuconostocaceae	map00710	Carbon fixation in photosynthetic organisms	1			Flavobacteriaceae	map04217	Necroptosis	2
Leuconostocaceae	map01100	Metabolic pathways	1			Flavobacteriaceae	map04621	NOD-like receptor signaling pathway	1
Leuconostocaceae	map01110	Biosynthesis of secondary metabolites	1			Flavobacteriaceae	map04626	Plant-pathogen interaction	1
Leuconostocaceae	map01120	Microbial metabolism in diverse environments	1			Flavobacteriaceae	map04910	Insulin signaling pathway	2
Leuconostocaceae	map01130		1			Flavobacteriaceae	map04922	Glucagon signaling pathway	2
Leuconostocaceae	map01200	Carbon metabolism	1			Flavobacteriaceae	map04931	Insulin resistance	2
Leuconostocaceae	map01230	Biosynthesis of amino acids	1			Flavobacteriaceae	map05132	Salmonella infection	1
Leuconostocaceae	map04066	HIF-1 signaling pathway	1			Flavobacteriaceae	map05134	Legionellosis	1
Leuconostocaceae	map05010	Alzheimer disease	1			Fusobacteriaceae	map00071	Fatty acid degradation	1
Methanothermaceae	map00511	Other glycan degradation	1			Fusobacteriaceae	map00072		1
Methanothermaceae	map00550	Peptidoglycan biosynthesis	1			Fusobacteriaceae	map00280	Valine, leucine and isoleucine degradation	1
Methanothermaceae	map01100	Metabolic pathways	1			Fusobacteriaceae	map00310	Lysine degradation	1
Methanothermaceae	map01502	Vancomycin resistance	1			Fusobacteriaceae	map00350	Tyrosine metabolism	1
Methanothermaceae	map02020	Two-component system	1			Fusobacteriaceae	map00362	Benzoate degradation	1
Methanothermaceae	map05100	Bacterial invasion of epithelial cells	1			Fusobacteriaceae	map00380	Tryptophan metabolism	1
Morganellaceae	map00670	One carbon pool by folate	1			Fusobacteriaceae	map00500	Starch and sucrose metabolism	2
Morganellaceae	map00720	Carbon fixation pathways in prokaryotes	1			Fusobacteriaceae	map00620	Pyruvate metabolism	1
Morganellaceae	map01100	Metabolic pathways	1			Fusobacteriaceae	map00630	Glyoxylate and dicarboxylate metabolism	1
Morganellaceae	map01120	Microbial metabolism in diverse environments	1			Fusobacteriaceae	map00640	Propanoate metabolism	1
Morganellaceae	map01200	Carbon metabolism	1			Fusobacteriaceae	map00650	Butanoate metabolism	1
Myxococcaceae	map00010	Glycolysis / Gluconeogenesis	2			Fusobacteriaceae	map00720	Carbon fixation pathways in prokaryotes	1
Myxococcaceae	map00710	Carbon fixation in photosynthetic organisms	2			Fusobacteriaceae	map00900	Terpenoid backbone biosynthesis	1
Myxococcaceae	map01100	Metabolic pathways	2			Fusobacteriaceae	map01100	Metabolic pathways	3
Myxococcaceae	map01110	Biosynthesis of secondary metabolites	2			Fusobacteriaceae	map01110	Biosynthesis of secondary metabolites	3
Myxococcaceae	map01120	Microbial metabolism in diverse environments	2			Fusobacteriaceae	map01120	Microbial metabolism in diverse environments	1
Myxococcaceae	map01130		2			Fusobacteriaceae	map01130		1
Myxococcaceae	map01200	Carbon metabolism	2			Fusobacteriaceae	map01200	Carbon metabolism	1
Myxococcaceae	map01230	Biosynthesis of amino acids	2			Fusobacteriaceae	map01212	Fatty acid metabolism	1
Myxococcaceae	map04066	HIF-1 signaling pathway	2			Fusobacteriaceae	map02020	Two-component system	1
Myxococcaceae	map05010	Alzheimer disease	2			Fusobacteriaceae	map02026	Biofilm formation - Escherichia coli	2
Niphatidae	map02020	Two-component system	2			Fusobacteriaceae	map04217	Necroptosis	2
Niphatidae	map02040	Flagellar assembly	2			Fusobacteriaceae	map04910	Insulin signaling pathway	2
Niphatidae	map04621	NOD-like receptor signaling pathway	2			Fusobacteriaceae	map04922	Glucagon signaling pathway	2
Niphatidae	map04626	Plant-pathogen interaction	2			Fusobacteriaceae	map04931	Insulin resistance	2
Niphatidae	map05132	Salmonella infection	2			Geobacteraceae	map02020	Two-component system	2
Niphatidae	map05134	Legionellosis	2			Geobacteraceae	map02040	Flagellar assembly	2
Opisthorchiidae	map00230	Purine metabolism	1			Geobacteraceae	map04621	NOD-like receptor signaling pathway	2
Opisthorchiidae	map00240	Pyrimidine metabolism	1			Geobacteraceae	map04626	Plant-pathogen interaction	2
Opisthorchiidae	map00511	Other glycan degradation	1			Geobacteraceae	map05132	Salmonella infection	2
Opisthorchiidae	map00550	Peptidoglycan biosynthesis	1			Geobacteraceae	map05134	Legionellosis	2
Opisthorchiidae	map00730	Thiamine metabolism	1			Geometridae	map02010	ABC transporters	1
Opisthorchiidae	map00760	Nicotinate and nicotinamide metabolism	1			Glossinidae	map02024	Quorum sensing	1
Opisthorchiidae	map00790	Folate biosynthesis	1			Gordoniaceae	map02010	ABC transporters	1
Opisthorchiidae	map01100	Metabolic pathways	2			Gordoniaceae	map02020	Two-component system	1
Opisthorchiidae	map01110	Biosynthesis of secondary metabolites	1			Gordoniaceae	map02040	Flagellar assembly	1
Opisthorchiidae	map01502	Vancomycin resistance	1			Gordoniaceae	map04621	NOD-like receptor signaling pathway	1
Opisthorchiidae	map02020	Two-component system	2			Gordoniaceae	map04626	Plant-pathogen interaction	1
Opisthorchiidae	map05100	Bacterial invasion of epithelial cells	1			Gordoniaceae	map05132	Salmonella infection	1
Oscillospiraceae	map00010	Glycolysis / Gluconeogenesis	29			Gordoniaceae	map05134	Legionellosis	1
Oscillospiraceae	map00020	Citrate cycle (TCA cycle)	25			Helicobacteraceae	map00500	Starch and sucrose metabolism	1
Oscillospiraceae	map00030	Pentose phosphate pathway	2			Helicobacteraceae	map01100	Metabolic pathways	1
Oscillospiraceae	map00051	Fructose and mannose metabolism	2			Helicobacteraceae	map03010	Ribosome	1
Oscillospiraceae	map00071	Fatty acid degradation	7			Heligmonellidae	map00010	Glycolysis / Gluconeogenesis	1
Oscillospiraceae	map00072		2			Heligmonellidae	map00020	Citrate cycle (TCA cycle)	1
Oscillospiraceae	map00190	Oxidative phosphorylation	69			Heligmonellidae	map00620	Pyruvate metabolism	1
Oscillospiraceae	map00220	Arginine biosynthesis	1			Heligmonellidae	map00710	Carbon fixation in photosynthetic organisms	1
Oscillospiraceae	map00250	Alanine, aspartate and glutamate metabolism	1			Heligmonellidae	map01100	Metabolic pathways	1
Oscillospiraceae	map00280	Valine, leucine and isoleucine degradation	7			Heligmonellidae	map01110	Biosynthesis of secondary metabolites	1
Oscillospiraceae	map00310	Lysine degradation	3			Heligmonellidae	map01120	Microbial metabolism in diverse environments	1
Oscillospiraceae	map00360	Phenylalanine metabolism	3			Heligmonellidae	map01130		1
Oscillospiraceae	map00362	Benzoate degradation	5			Heligmonellidae	map01200	Carbon metabolism	1
Oscillospiraceae	map00380	Tryptophan metabolism	2			Hungateiclostridiaceae	map00010	Glycolysis / Gluconeogenesis	5
Oscillospiraceae	map00562	Inositol phosphate metabolism	2			Hungateiclostridiaceae	map00020	Citrate cycle (TCA cycle)	4
Oscillospiraceae	map00620	Pyruvate metabolism	29			Hungateiclostridiaceae	map00511	Other glycan degradation	3
Oscillospiraceae	map00630	Glyoxylate and dicarboxylate metabolism	2			Hungateiclostridiaceae	map00600	Sphingolipid metabolism	3
Oscillospiraceae	map00640	Propanoate metabolism	2			Hungateiclostridiaceae	map00620	Pyruvate metabolism	4
Oscillospiraceae	map00650	Butanoate metabolism	12			Hungateiclostridiaceae	map00710	Carbon fixation in photosynthetic organisms	5
Oscillospiraceae	map00710	Carbon fixation in photosynthetic organisms	31			Hungateiclostridiaceae	map01100	Metabolic pathways	5
Oscillospiraceae	map00720	Carbon fixation pathways in prokaryotes	6			Hungateiclostridiaceae	map01110	Biosynthesis of secondary metabolites	5
Oscillospiraceae	map00900	Terpenoid backbone biosynthesis	4			Hungateiclostridiaceae	map01120	Microbial metabolism in diverse environments	5
Oscillospiraceae	map00910	Nitrogen metabolism	1			Hungateiclostridiaceae	map01130		5
Oscillospiraceae	map01051	Biosynthesis of ansamycins	2			Hungateiclostridiaceae	map01200	Carbon metabolism	5
Oscillospiraceae	map01100	Metabolic pathways	115			Hungateiclostridiaceae	map01230	Biosynthesis of amino acids	1
Oscillospiraceae	map01110	Biosynthesis of secondary metabolites	38			Hungateiclostridiaceae	map01501	beta-Lactam resistance	14
Oscillospiraceae	map01120	Microbial metabolism in diverse environments	43			Hungateiclostridiaceae	map02010	ABC transporters	22
Oscillospiraceae	map01130		35			Hungateiclostridiaceae	map02020	Two-component system	5
Oscillospiraceae	map01200	Carbon metabolism	40			Hungateiclostridiaceae	map02024	Quorum sensing	24
Oscillospiraceae	map01212	Fatty acid metabolism	7			Hungateiclostridiaceae	map02040	Flagellar assembly	5
Oscillospiraceae	map01230	Biosynthesis of amino acids	6			Hungateiclostridiaceae	map03010	Ribosome	1
Oscillospiraceae	map02010	ABC transporters	4			Hungateiclostridiaceae	map03320	PPAR signaling pathway	4
Oscillospiraceae	map02020	Two-component system	80			Hungateiclostridiaceae	map04066	HIF-1 signaling pathway	1
Oscillospiraceae	map02030	Bacterial chemotaxis	4			Hungateiclostridiaceae	map04068	FoxO signaling pathway	4
Oscillospiraceae	map02040	Flagellar assembly	78			Hungateiclostridiaceae	map04142	Lysosome	3
Oscillospiraceae	map03010	Ribosome	41			Hungateiclostridiaceae	map04151	PI3K-Akt signaling pathway	4
Oscillospiraceae	map03018	RNA degradation	10			Hungateiclostridiaceae	map04152	AMPK signaling pathway	4
Oscillospiraceae	map04066	HIF-1 signaling pathway	2			Hungateiclostridiaceae	map04621	NOD-like receptor signaling pathway	5
Oscillospiraceae	map04212	Longevity regulating pathway - worm	10			Hungateiclostridiaceae	map04626	Plant-pathogen interaction	5
Oscillospiraceae	map04621	NOD-like receptor signaling pathway	78			Hungateiclostridiaceae	map04910	Insulin signaling pathway	4
Oscillospiraceae	map04626	Plant-pathogen interaction	78			Hungateiclostridiaceae	map04920	Adipocytokine signaling pathway	4
Oscillospiraceae	map04940	Type I diabetes mellitus	8			Hungateiclostridiaceae	map04922	Glucagon signaling pathway	4
Oscillospiraceae	map05010	Alzheimer disease	2			Hungateiclostridiaceae	map04931	Insulin resistance	4
Oscillospiraceae	map05132	Salmonella infection	78			Hungateiclostridiaceae	map04964	Proximal tubule bicarbonate reclamation	4
Oscillospiraceae	map05134	Legionellosis	86			Hungateiclostridiaceae	map05010	Alzheimer disease	1
Oscillospiraceae	map05152	Tuberculosis	10			Hungateiclostridiaceae	map05132	Salmonella infection	5
Paenibacillaceae	map00562	Inositol phosphate metabolism	2			Hungateiclostridiaceae	map05134	Legionellosis	5
Paenibacillaceae	map01120	Microbial metabolism in diverse environments	2			Hymenobacteraceae	map00260	Glycine, serine and threonine metabolism	1
Paenibacillaceae	map02010	ABC transporters	3			Hymenobacteraceae	map00460	Cyanoamino acid metabolism	1
Paenibacillaceae	map02020	Two-component system	2			Hymenobacteraceae	map00630	Glyoxylate and dicarboxylate metabolism	1
Paenibacillaceae	map02040	Flagellar assembly	2			Hymenobacteraceae	map00670	One carbon pool by folate	1
Paenibacillaceae	map03010	Ribosome	3			Hymenobacteraceae	map00680	Methane metabolism	1
Paenibacillaceae	map04621	NOD-like receptor signaling pathway	2			Hymenobacteraceae	map01100	Metabolic pathways	1
Paenibacillaceae	map04626	Plant-pathogen interaction	2			Hymenobacteraceae	map01110	Biosynthesis of secondary metabolites	1
Paenibacillaceae	map05132	Salmonella infection	2			Hymenobacteraceae	map01120	Microbial metabolism in diverse environments	1
Paenibacillaceae	map05134	Legionellosis	2			Hymenobacteraceae	map01130		1
Pasteurellaceae	map00220	Arginine biosynthesis	2			Hymenobacteraceae	map01200	Carbon metabolism	1
Pasteurellaceae	map00250	Alanine, aspartate and glutamate metabolism	2			Hymenobacteraceae	map01230	Biosynthesis of amino acids	1
Pasteurellaceae	map00910	Nitrogen metabolism	2			Hymenobacteraceae	map01523	Antifolate resistance	1
Pasteurellaceae	map01100	Metabolic pathways	2			Ktedonobacteraceae	map00010	Glycolysis / Gluconeogenesis	1
Peptococcaceae	map00670	One carbon pool by folate	3			Ktedonobacteraceae	map00051	Fructose and mannose metabolism	1
Peptococcaceae	map00720	Carbon fixation pathways in prokaryotes	3			Ktedonobacteraceae	map00562	Inositol phosphate metabolism	1
Peptococcaceae	map01100	Metabolic pathways	3			Ktedonobacteraceae	map00710	Carbon fixation in photosynthetic organisms	1
Peptococcaceae	map01120	Microbial metabolism in diverse environments	3			Ktedonobacteraceae	map01100	Metabolic pathways	1
Peptococcaceae	map01200	Carbon metabolism	3			Ktedonobacteraceae	map01110	Biosynthesis of secondary metabolites	1
Porphyromonadaceae	map00030	Pentose phosphate pathway	1			Ktedonobacteraceae	map01120	Microbial metabolism in diverse environments	1
Porphyromonadaceae	map00710	Carbon fixation in photosynthetic organisms	1			Ktedonobacteraceae	map01130		1
Porphyromonadaceae	map01051	Biosynthesis of ansamycins	1			Ktedonobacteraceae	map01200	Carbon metabolism	1
Porphyromonadaceae	map01100	Metabolic pathways	1			Ktedonobacteraceae	map01230	Biosynthesis of amino acids	1
Porphyromonadaceae	map01110	Biosynthesis of secondary metabolites	1			Lachnospiraceae	map00010	Glycolysis / Gluconeogenesis	354
Porphyromonadaceae	map01120	Microbial metabolism in diverse environments	1			Lachnospiraceae	map00020	Citrate cycle (TCA cycle)	155
Porphyromonadaceae	map01130		1			Lachnospiraceae	map00030	Pentose phosphate pathway	109
Porphyromonadaceae	map01200	Carbon metabolism	1			Lachnospiraceae	map00040	Pentose and glucuronate interconversions	59
Porphyromonadaceae	map01230	Biosynthesis of amino acids	1			Lachnospiraceae	map00051	Fructose and mannose metabolism	150
Porphyromonadaceae	map03010	Ribosome	2			Lachnospiraceae	map00052	Galactose metabolism	116
Prevotellaceae	map00010	Glycolysis / Gluconeogenesis	30			Lachnospiraceae	map00053	Ascorbate and aldarate metabolism	8
Prevotellaceae	map00020	Citrate cycle (TCA cycle)	16			Lachnospiraceae	map00061	Fatty acid biosynthesis	11
Prevotellaceae	map00030	Pentose phosphate pathway	1			Lachnospiraceae	map00071	Fatty acid degradation	24
Prevotellaceae	map00040	Pentose and glucuronate interconversions	3			Lachnospiraceae	map00072		12
Prevotellaceae	map00051	Fructose and mannose metabolism	3			Lachnospiraceae	map00121	Secondary bile acid biosynthesis	3
Prevotellaceae	map00190	Oxidative phosphorylation	4			Lachnospiraceae	map00190	Oxidative phosphorylation	31
Prevotellaceae	map00220	Arginine biosynthesis	3			Lachnospiraceae	map00195	Photosynthesis	19
Prevotellaceae	map00250	Alanine, aspartate and glutamate metabolism	3			Lachnospiraceae	map00220	Arginine biosynthesis	19
Prevotellaceae	map00260	Glycine, serine and threonine metabolism	1			Lachnospiraceae	map00230	Purine metabolism	102
Prevotellaceae	map00270	Cysteine and methionine metabolism	3			Lachnospiraceae	map00240	Pyrimidine metabolism	46
Prevotellaceae	map00500	Starch and sucrose metabolism	2			Lachnospiraceae	map00250	Alanine, aspartate and glutamate metabolism	20
Prevotellaceae	map00562	Inositol phosphate metabolism	3			Lachnospiraceae	map00260	Glycine, serine and threonine metabolism	35
Prevotellaceae	map00620	Pyruvate metabolism	12			Lachnospiraceae	map00261	Monobactam biosynthesis	11
Prevotellaceae	map00630	Glyoxylate and dicarboxylate metabolism	3			Lachnospiraceae	map00270	Cysteine and methionine metabolism	21
Prevotellaceae	map00650	Butanoate metabolism	10			Lachnospiraceae	map00280	Valine, leucine and isoleucine degradation	30
Prevotellaceae	map00680	Methane metabolism	13			Lachnospiraceae	map00290	Valine, leucine and isoleucine biosynthesis	8
Prevotellaceae	map00710	Carbon fixation in photosynthetic organisms	18			Lachnospiraceae	map00300	Lysine biosynthesis	12
Prevotellaceae	map00720	Carbon fixation pathways in prokaryotes	13			Lachnospiraceae	map00310	Lysine degradation	12
Prevotellaceae	map00750	Vitamin B6 metabolism	1			Lachnospiraceae	map00330	Arginine and proline metabolism	5
Prevotellaceae	map00910	Nitrogen metabolism	3			Lachnospiraceae	map00333	Prodigiosin biosynthesis	7
Prevotellaceae	map01100	Metabolic pathways	45			Lachnospiraceae	map00340	Histidine metabolism	1
Prevotellaceae	map01110	Biosynthesis of secondary metabolites	33			Lachnospiraceae	map00360	Phenylalanine metabolism	18
Prevotellaceae	map01120	Microbial metabolism in diverse environments	38			Lachnospiraceae	map00362	Benzoate degradation	31
Prevotellaceae	map01130		38			Lachnospiraceae	map00380	Tryptophan metabolism	12
Prevotellaceae	map01200	Carbon metabolism	38			Lachnospiraceae	map00400	Phenylalanine, tyrosine and tryptophan biosynthesis	11
Prevotellaceae	map01230	Biosynthesis of amino acids	22			Lachnospiraceae	map00430	Taurine and hypotaurine metabolism	1
Prevotellaceae	map02024	Quorum sensing	1			Lachnospiraceae	map00450	Selenocompound metabolism	2
Prevotellaceae	map02026	Biofilm formation - Escherichia coli	2			Lachnospiraceae	map00460	Cyanoamino acid metabolism	15
Prevotellaceae	map03010	Ribosome	38			Lachnospiraceae	map00471		10
Prevotellaceae	map03018	RNA degradation	9			Lachnospiraceae	map00480	Glutathione metabolism	5
Prevotellaceae	map03060	Protein export	1			Lachnospiraceae	map00500	Starch and sucrose metabolism	310
Prevotellaceae	map03070	Bacterial secretion system	1			Lachnospiraceae	map00511	Other glycan degradation	21
Prevotellaceae	map04066	HIF-1 signaling pathway	16			Lachnospiraceae	map00520	Amino sugar and nucleotide sugar metabolism	166
Prevotellaceae	map04217	Necroptosis	2			Lachnospiraceae	map00521	Streptomycin biosynthesis	42
Prevotellaceae	map04910	Insulin signaling pathway	2			Lachnospiraceae	map00523	Polyketide sugar unit biosynthesis	5
Prevotellaceae	map04922	Glucagon signaling pathway	2			Lachnospiraceae	map00531	Glycosaminoglycan degradation	1
Prevotellaceae	map04931	Insulin resistance	2			Lachnospiraceae	map00561	Glycerolipid metabolism	12
Prevotellaceae	map05010	Alzheimer disease	7			Lachnospiraceae	map00562	Inositol phosphate metabolism	63
Prevotellaceae	map05134	Legionellosis	4			Lachnospiraceae	map00564	Glycerophospholipid metabolism	6
Pseudoalteromonadaceae	map03010	Ribosome	1			Lachnospiraceae	map00600	Sphingolipid metabolism	17
Pseudonocardiaceae	map02010	ABC transporters	1			Lachnospiraceae	map00603	Glycosphingolipid biosynthesis - globo and isoglobo series	2
Pteromalidae	map02020	Two-component system	1			Lachnospiraceae	map00620	Pyruvate metabolism	346
Pteromalidae	map02040	Flagellar assembly	1			Lachnospiraceae	map00630	Glyoxylate and dicarboxylate metabolism	44
Pteromalidae	map04621	NOD-like receptor signaling pathway	1			Lachnospiraceae	map00633	Nitrotoluene degradation	16
Pteromalidae	map04626	Plant-pathogen interaction	1			Lachnospiraceae	map00640	Propanoate metabolism	146
Pteromalidae	map05132	Salmonella infection	1			Lachnospiraceae	map00643	Styrene degradation	1
Pteromalidae	map05134	Legionellosis	1			Lachnospiraceae	map00650	Butanoate metabolism	217
Pucciniaceae	map00500	Starch and sucrose metabolism	1			Lachnospiraceae	map00670	One carbon pool by folate	10
Pucciniaceae	map00520	Amino sugar and nucleotide sugar metabolism	1			Lachnospiraceae	map00680	Methane metabolism	104
Pucciniaceae	map01100	Metabolic pathways	1			Lachnospiraceae	map00710	Carbon fixation in photosynthetic organisms	255
Pucciniaceae	map01110	Biosynthesis of secondary metabolites	1			Lachnospiraceae	map00720	Carbon fixation pathways in prokaryotes	144
Pucciniaceae	map02026	Biofilm formation - Escherichia coli	1			Lachnospiraceae	map00730	Thiamine metabolism	6
Pyrinomonadaceae	map03018	RNA degradation	1			Lachnospiraceae	map00750	Vitamin B6 metabolism	5
Pyrinomonadaceae	map04212	Longevity regulating pathway - worm	1			Lachnospiraceae	map00760	Nicotinate and nicotinamide metabolism	11
Pyrinomonadaceae	map05152	Tuberculosis	1			Lachnospiraceae	map00770	Pantothenate and CoA biosynthesis	8
Rhodobacteraceae	map00220	Arginine biosynthesis	2			Lachnospiraceae	map00780	Biotin metabolism	10
Rhodobacteraceae	map00250	Alanine, aspartate and glutamate metabolism	2			Lachnospiraceae	map00790	Folate biosynthesis	6
Rhodobacteraceae	map00471		2			Lachnospiraceae	map00900	Terpenoid backbone biosynthesis	40
Rhodobacteraceae	map00910	Nitrogen metabolism	2			Lachnospiraceae	map00910	Nitrogen metabolism	19
Rhodobacteraceae	map01100	Metabolic pathways	2			Lachnospiraceae	map00920	Sulfur metabolism	3
Rhodobacteraceae	map01200	Carbon metabolism	2			Lachnospiraceae	map00940	Phenylpropanoid biosynthesis	12
Rhodobacteraceae	map02020	Two-component system	1			Lachnospiraceae	map00970	Aminoacyl-tRNA biosynthesis	12
Rhodobacteraceae	map02024	Quorum sensing	3			Lachnospiraceae	map01040	Biosynthesis of unsaturated fatty acids	6
Rhodobacteraceae	map02040	Flagellar assembly	1			Lachnospiraceae	map01051	Biosynthesis of ansamycins	2
Rhodobacteraceae	map04217	Necroptosis	2			Lachnospiraceae	map01100	Metabolic pathways	1187
Rhodobacteraceae	map04621	NOD-like receptor signaling pathway	1			Lachnospiraceae	map01110	Biosynthesis of secondary metabolites	622
Rhodobacteraceae	map04626	Plant-pathogen interaction	1			Lachnospiraceae	map01120	Microbial metabolism in diverse environments	661
Rhodobacteraceae	map04964	Proximal tubule bicarbonate reclamation	2			Lachnospiraceae	map01130		488
Rhodobacteraceae	map05132	Salmonella infection	1			Lachnospiraceae	map01200	Carbon metabolism	431
Rhodobacteraceae	map05134	Legionellosis	1			Lachnospiraceae	map01210	2-Oxocarboxylic acid metabolism	21
Rikenellaceae	map00010	Glycolysis / Gluconeogenesis	16			Lachnospiraceae	map01212	Fatty acid metabolism	35
Rikenellaceae	map00020	Citrate cycle (TCA cycle)	16			Lachnospiraceae	map01220	Degradation of aromatic compounds	1
Rikenellaceae	map00190	Oxidative phosphorylation	4			Lachnospiraceae	map01230	Biosynthesis of amino acids	193
Rikenellaceae	map00220	Arginine biosynthesis	7			Lachnospiraceae	map01501	beta-Lactam resistance	48
Rikenellaceae	map00250	Alanine, aspartate and glutamate metabolism	7			Lachnospiraceae	map01523	Antifolate resistance	4
Rikenellaceae	map00260	Glycine, serine and threonine metabolism	10			Lachnospiraceae	map02010	ABC transporters	327
Rikenellaceae	map00500	Starch and sucrose metabolism	1			Lachnospiraceae	map02020	Two-component system	440
Rikenellaceae	map00620	Pyruvate metabolism	12			Lachnospiraceae	map02024	Quorum sensing	129
Rikenellaceae	map00650	Butanoate metabolism	13			Lachnospiraceae	map02026	Biofilm formation - Escherichia coli	153
Rikenellaceae	map00680	Methane metabolism	4			Lachnospiraceae	map02030	Bacterial chemotaxis	201
Rikenellaceae	map00710	Carbon fixation in photosynthetic organisms	5			Lachnospiraceae	map02040	Flagellar assembly	256
Rikenellaceae	map00720	Carbon fixation pathways in prokaryotes	13			Lachnospiraceae	map02060	Phosphotransferase system (PTS)	17
Rikenellaceae	map00750	Vitamin B6 metabolism	2			Lachnospiraceae	map03010	Ribosome	254
Rikenellaceae	map00910	Nitrogen metabolism	7			Lachnospiraceae	map03018	RNA degradation	92
Rikenellaceae	map01100	Metabolic pathways	30			Lachnospiraceae	map03020	RNA polymerase	31
Rikenellaceae	map01110	Biosynthesis of secondary metabolites	12			Lachnospiraceae	map03030	DNA replication	11
Rikenellaceae	map01120	Microbial metabolism in diverse environments	22			Lachnospiraceae	map03060	Protein export	2
Rikenellaceae	map01130		22			Lachnospiraceae	map03070	Bacterial secretion system	2
Rikenellaceae	map01200	Carbon metabolism	22			Lachnospiraceae	map03320	PPAR signaling pathway	3
Rikenellaceae	map01230	Biosynthesis of amino acids	6			Lachnospiraceae	map03430	Mismatch repair	11
Rikenellaceae	map02026	Biofilm formation - Escherichia coli	1			Lachnospiraceae	map03440	Homologous recombination	11
Rikenellaceae	map03010	Ribosome	28			Lachnospiraceae	map04066	HIF-1 signaling pathway	28
Rikenellaceae	map03018	RNA degradation	4			Lachnospiraceae	map04112	Cell cycle - Caulobacter	2
Rikenellaceae	map04066	HIF-1 signaling pathway	4			Lachnospiraceae	map04141	Protein processing in endoplasmic reticulum	10
Rikenellaceae	map04212	Longevity regulating pathway - worm	2			Lachnospiraceae	map04142	Lysosome	4
Rikenellaceae	map04217	Necroptosis	1			Lachnospiraceae	map04146	Peroxisome	5
Rikenellaceae	map04910	Insulin signaling pathway	1			Lachnospiraceae	map04151	PI3K-Akt signaling pathway	8
Rikenellaceae	map04922	Glucagon signaling pathway	1			Lachnospiraceae	map04152	AMPK signaling pathway	2
Rikenellaceae	map04931	Insulin resistance	1			Lachnospiraceae	map04212	Longevity regulating pathway - worm	92
Rikenellaceae	map04940	Type I diabetes mellitus	2			Lachnospiraceae	map04217	Necroptosis	88
Rikenellaceae	map05010	Alzheimer disease	2			Lachnospiraceae	map04612	Antigen processing and presentation	8
Rikenellaceae	map05134	Legionellosis	4			Lachnospiraceae	map04621	NOD-like receptor signaling pathway	239
Rikenellaceae	map05152	Tuberculosis	2			Lachnospiraceae	map04626	Plant-pathogen interaction	242
Roseivirgaceae	map02010	ABC transporters	1			Lachnospiraceae	map04657	IL-17 signaling pathway	8
Ruminococcaceae	map00010	Glycolysis / Gluconeogenesis	46			Lachnospiraceae	map04659	Th17 cell differentiation	8
Ruminococcaceae	map00020	Citrate cycle (TCA cycle)	10			Lachnospiraceae	map04724	Glutamatergic synapse	9
Ruminococcaceae	map00030	Pentose phosphate pathway	7			Lachnospiraceae	map04727	GABAergic synapse	9
Ruminococcaceae	map00040	Pentose and glucuronate interconversions	1			Lachnospiraceae	map04910	Insulin signaling pathway	61
Ruminococcaceae	map00051	Fructose and mannose metabolism	5			Lachnospiraceae	map04914	Progesterone-mediated oocyte maturation	8
Ruminococcaceae	map00071	Fatty acid degradation	3			Lachnospiraceae	map04915	Estrogen signaling pathway	8
Ruminococcaceae	map00072		1			Lachnospiraceae	map04917	Prolactin signaling pathway	3
Ruminococcaceae	map00190	Oxidative phosphorylation	1			Lachnospiraceae	map04922	Glucagon signaling pathway	71
Ruminococcaceae	map00220	Arginine biosynthesis	9			Lachnospiraceae	map04930	Type II diabetes mellitus	2
Ruminococcaceae	map00250	Alanine, aspartate and glutamate metabolism	9			Lachnospiraceae	map04931	Insulin resistance	61
Ruminococcaceae	map00280	Valine, leucine and isoleucine degradation	2			Lachnospiraceae	map04940	Type I diabetes mellitus	50
Ruminococcaceae	map00310	Lysine degradation	2			Lachnospiraceae	map04964	Proximal tubule bicarbonate reclamation	10
Ruminococcaceae	map00350	Tyrosine metabolism	1			Lachnospiraceae	map05010	Alzheimer disease	28
Ruminococcaceae	map00362	Benzoate degradation	1			Lachnospiraceae	map05132	Salmonella infection	231
Ruminococcaceae	map00380	Tryptophan metabolism	1			Lachnospiraceae	map05134	Legionellosis	282
Ruminococcaceae	map00430	Taurine and hypotaurine metabolism	6			Lachnospiraceae	map05152	Tuberculosis	90
Ruminococcaceae	map00460	Cyanoamino acid metabolism	6			Lachnospiraceae	map05165	Human papillomavirus infection	2
Ruminococcaceae	map00471		6			Lachnospiraceae	map05200	Pathways in cancer	8
Ruminococcaceae	map00480	Glutathione metabolism	6			Lachnospiraceae	map05203	Viral carcinogenesis	2
Ruminococcaceae	map00500	Starch and sucrose metabolism	4			Lachnospiraceae	map05215	Prostate cancer	8
Ruminococcaceae	map00520	Amino sugar and nucleotide sugar metabolism	4			Lachnospiraceae	map05230	Central carbon metabolism in cancer	4
Ruminococcaceae	map00562	Inositol phosphate metabolism	1			Lachnospiraceae	map05418	Fluid shear stress and atherosclerosis	8
Ruminococcaceae	map00620	Pyruvate metabolism	19			Lactobacillaceae	map00010	Glycolysis / Gluconeogenesis	85
Ruminococcaceae	map00625	Chloroalkane and chloroalkene degradation	1			Lactobacillaceae	map00020	Citrate cycle (TCA cycle)	2
Ruminococcaceae	map00626	Naphthalene degradation	1			Lactobacillaceae	map00030	Pentose phosphate pathway	27
Ruminococcaceae	map00630	Glyoxylate and dicarboxylate metabolism	2			Lactobacillaceae	map00051	Fructose and mannose metabolism	20
Ruminococcaceae	map00640	Propanoate metabolism	1			Lactobacillaceae	map00052	Galactose metabolism	3
Ruminococcaceae	map00643	Styrene degradation	2			Lactobacillaceae	map00220	Arginine biosynthesis	8
Ruminococcaceae	map00650	Butanoate metabolism	12			Lactobacillaceae	map00230	Purine metabolism	29
Ruminococcaceae	map00680	Methane metabolism	9			Lactobacillaceae	map00260	Glycine, serine and threonine metabolism	2
Ruminococcaceae	map00710	Carbon fixation in photosynthetic organisms	40			Lactobacillaceae	map00270	Cysteine and methionine metabolism	12
Ruminococcaceae	map00720	Carbon fixation pathways in prokaryotes	15			Lactobacillaceae	map00290	Valine, leucine and isoleucine biosynthesis	6
Ruminococcaceae	map00900	Terpenoid backbone biosynthesis	1			Lactobacillaceae	map00350	Tyrosine metabolism	4
Ruminococcaceae	map00910	Nitrogen metabolism	9			Lactobacillaceae	map00480	Glutathione metabolism	8
Ruminococcaceae	map01051	Biosynthesis of ansamycins	4			Lactobacillaceae	map00520	Amino sugar and nucleotide sugar metabolism	8
Ruminococcaceae	map01100	Metabolic pathways	81			Lactobacillaceae	map00562	Inositol phosphate metabolism	9
Ruminococcaceae	map01110	Biosynthesis of secondary metabolites	49			Lactobacillaceae	map00620	Pyruvate metabolism	57
Ruminococcaceae	map01120	Microbial metabolism in diverse environments	61			Lactobacillaceae	map00630	Glyoxylate and dicarboxylate metabolism	6
Ruminococcaceae	map01130		51			Lactobacillaceae	map00640	Propanoate metabolism	22
Ruminococcaceae	map01200	Carbon metabolism	61			Lactobacillaceae	map00650	Butanoate metabolism	16
Ruminococcaceae	map01212	Fatty acid metabolism	2			Lactobacillaceae	map00660	C5-Branched dibasic acid metabolism	6
Ruminococcaceae	map01220	Degradation of aromatic compounds	1			Lactobacillaceae	map00680	Methane metabolism	25
Ruminococcaceae	map01230	Biosynthesis of amino acids	39			Lactobacillaceae	map00710	Carbon fixation in photosynthetic organisms	37
Ruminococcaceae	map02010	ABC transporters	27			Lactobacillaceae	map00720	Carbon fixation pathways in prokaryotes	1
Ruminococcaceae	map02020	Two-component system	8			Lactobacillaceae	map00770	Pantothenate and CoA biosynthesis	6
Ruminococcaceae	map02024	Quorum sensing	7			Lactobacillaceae	map00791	Atrazine degradation	3
Ruminococcaceae	map02026	Biofilm formation - Escherichia coli	4			Lactobacillaceae	map01100	Metabolic pathways	137
Ruminococcaceae	map02030	Bacterial chemotaxis	6			Lactobacillaceae	map01110	Biosynthesis of secondary metabolites	104
Ruminococcaceae	map02040	Flagellar assembly	7			Lactobacillaceae	map01120	Microbial metabolism in diverse environments	126
Ruminococcaceae	map03010	Ribosome	10			Lactobacillaceae	map01130		104
Ruminococcaceae	map03018	RNA degradation	9			Lactobacillaceae	map01200	Carbon metabolism	82
Ruminococcaceae	map03030	DNA replication	11			Lactobacillaceae	map01210	2-Oxocarboxylic acid metabolism	6
Ruminococcaceae	map03320	PPAR signaling pathway	3			Lactobacillaceae	map01230	Biosynthesis of amino acids	79
Ruminococcaceae	map03430	Mismatch repair	11			Lactobacillaceae	map01501	beta-Lactam resistance	10
Ruminococcaceae	map03440	Homologous recombination	11			Lactobacillaceae	map02010	ABC transporters	31
Ruminococcaceae	map04066	HIF-1 signaling pathway	31			Lactobacillaceae	map02020	Two-component system	1
Ruminococcaceae	map04068	FoxO signaling pathway	3			Lactobacillaceae	map02024	Quorum sensing	10
Ruminococcaceae	map04151	PI3K-Akt signaling pathway	3			Lactobacillaceae	map02030	Bacterial chemotaxis	1
Ruminococcaceae	map04152	AMPK signaling pathway	3			Lactobacillaceae	map02060	Phosphotransferase system (PTS)	8
Ruminococcaceae	map04212	Longevity regulating pathway - worm	3			Lactobacillaceae	map03010	Ribosome	88
Ruminococcaceae	map04217	Necroptosis	6			Lactobacillaceae	map03018	RNA degradation	28
Ruminococcaceae	map04621	NOD-like receptor signaling pathway	7			Lactobacillaceae	map04066	HIF-1 signaling pathway	28
Ruminococcaceae	map04626	Plant-pathogen interaction	7			Lactobacillaceae	map04152	AMPK signaling pathway	3
Ruminococcaceae	map04910	Insulin signaling pathway	3			Lactobacillaceae	map04212	Longevity regulating pathway - worm	10
Ruminococcaceae	map04920	Adipocytokine signaling pathway	3			Lactobacillaceae	map04922	Glucagon signaling pathway	40
Ruminococcaceae	map04922	Glucagon signaling pathway	3			Lactobacillaceae	map04930	Type II diabetes mellitus	26
Ruminococcaceae	map04931	Insulin resistance	3			Lactobacillaceae	map04940	Type I diabetes mellitus	10
Ruminococcaceae	map04940	Type I diabetes mellitus	3			Lactobacillaceae	map05010	Alzheimer disease	13
Ruminococcaceae	map04964	Proximal tubule bicarbonate reclamation	9			Lactobacillaceae	map05120	Epithelial cell signaling in Helicobacter pylori infection	3
Ruminococcaceae	map05010	Alzheimer disease	25			Lactobacillaceae	map05134	Legionellosis	10
Ruminococcaceae	map05132	Salmonella infection	7			Lactobacillaceae	map05152	Tuberculosis	10
Ruminococcaceae	map05134	Legionellosis	10			Lactobacillaceae	map05165	Human papillomavirus infection	26
Ruminococcaceae	map05152	Tuberculosis	3			Lactobacillaceae	map05203	Viral carcinogenesis	26
Saccharomycetaceae	map02020	Two-component system	3			Lactobacillaceae	map05230	Central carbon metabolism in cancer	35
Saccharomycetaceae	map02040	Flagellar assembly	3			Legionellaceae	map02020	Two-component system	1
Saccharomycetaceae	map04621	NOD-like receptor signaling pathway	3			Legionellaceae	map02040	Flagellar assembly	1
Saccharomycetaceae	map04626	Plant-pathogen interaction	3			Legionellaceae	map04621	NOD-like receptor signaling pathway	1
Saccharomycetaceae	map05132	Salmonella infection	3			Legionellaceae	map04626	Plant-pathogen interaction	1
Saccharomycetaceae	map05134	Legionellosis	3			Legionellaceae	map05132	Salmonella infection	1
Sandaracinaceae	map03010	Ribosome	2			Legionellaceae	map05134	Legionellosis	1
Selenomonadaceae	map00020	Citrate cycle (TCA cycle)	1			Leptotrichiaceae	map00010	Glycolysis / Gluconeogenesis	1
Selenomonadaceae	map00270	Cysteine and methionine metabolism	1			Leptotrichiaceae	map00020	Citrate cycle (TCA cycle)	1
Selenomonadaceae	map00620	Pyruvate metabolism	7			Leptotrichiaceae	map00620	Pyruvate metabolism	1
Selenomonadaceae	map00630	Glyoxylate and dicarboxylate metabolism	1			Leptotrichiaceae	map00710	Carbon fixation in photosynthetic organisms	1
Selenomonadaceae	map00640	Propanoate metabolism	6			Leptotrichiaceae	map01100	Metabolic pathways	1
Selenomonadaceae	map00650	Butanoate metabolism	6			Leptotrichiaceae	map01110	Biosynthesis of secondary metabolites	1
Selenomonadaceae	map00680	Methane metabolism	1			Leptotrichiaceae	map01120	Microbial metabolism in diverse environments	1
Selenomonadaceae	map00710	Carbon fixation in photosynthetic organisms	1			Leptotrichiaceae	map01130		1
Selenomonadaceae	map00720	Carbon fixation pathways in prokaryotes	1			Leptotrichiaceae	map01200	Carbon metabolism	1
Selenomonadaceae	map01100	Metabolic pathways	7			Leptotrichiaceae	map03010	Ribosome	1
Selenomonadaceae	map01110	Biosynthesis of secondary metabolites	1			Leuconostocaceae	map00010	Glycolysis / Gluconeogenesis	1
Selenomonadaceae	map01120	Microbial metabolism in diverse environments	7			Leuconostocaceae	map00710	Carbon fixation in photosynthetic organisms	1
Selenomonadaceae	map01130		1			Leuconostocaceae	map01100	Metabolic pathways	1
Selenomonadaceae	map01200	Carbon metabolism	1			Leuconostocaceae	map01110	Biosynthesis of secondary metabolites	1
Sphingobacteriaceae	map03010	Ribosome	4			Leuconostocaceae	map01120	Microbial metabolism in diverse environments	1
Sphingomonadaceae	map02020	Two-component system	4			Leuconostocaceae	map01130		1
Sphingomonadaceae	map02040	Flagellar assembly	4			Leuconostocaceae	map01200	Carbon metabolism	1
Sphingomonadaceae	map04621	NOD-like receptor signaling pathway	4			Leuconostocaceae	map01230	Biosynthesis of amino acids	1
Sphingomonadaceae	map04626	Plant-pathogen interaction	4			Leuconostocaceae	map04066	HIF-1 signaling pathway	1
Sphingomonadaceae	map05132	Salmonella infection	4			Leuconostocaceae	map05010	Alzheimer disease	1
Sphingomonadaceae	map05134	Legionellosis	4			Lottiidae	map00010	Glycolysis / Gluconeogenesis	1
Spirochaetaceae	map00010	Glycolysis / Gluconeogenesis	1			Lottiidae	map00020	Citrate cycle (TCA cycle)	1
Spirochaetaceae	map00680	Methane metabolism	1			Lottiidae	map00620	Pyruvate metabolism	1
Spirochaetaceae	map00720	Carbon fixation pathways in prokaryotes	2			Lottiidae	map01100	Metabolic pathways	1
Spirochaetaceae	map01100	Metabolic pathways	1			Lottiidae	map01110	Biosynthesis of secondary metabolites	1
Spirochaetaceae	map01110	Biosynthesis of secondary metabolites	1			Lottiidae	map01120	Microbial metabolism in diverse environments	1
Spirochaetaceae	map01120	Microbial metabolism in diverse environments	3			Lottiidae	map01130		1
Spirochaetaceae	map01130		1			Lottiidae	map03320	PPAR signaling pathway	1
Spirochaetaceae	map01200	Carbon metabolism	3			Lottiidae	map04068	FoxO signaling pathway	1
Spirochaetaceae	map01230	Biosynthesis of amino acids	1			Lottiidae	map04151	PI3K-Akt signaling pathway	1
Spirochaetaceae	map02010	ABC transporters	5			Lottiidae	map04152	AMPK signaling pathway	1
Spirochaetaceae	map03018	RNA degradation	1			Lottiidae	map04910	Insulin signaling pathway	1
Spirochaetaceae	map04066	HIF-1 signaling pathway	1			Lottiidae	map04920	Adipocytokine signaling pathway	1
Sporomusaceae	map00670	One carbon pool by folate	3			Lottiidae	map04922	Glucagon signaling pathway	1
Sporomusaceae	map00720	Carbon fixation pathways in prokaryotes	3			Lottiidae	map04931	Insulin resistance	1
Sporomusaceae	map01100	Metabolic pathways	3			Lottiidae	map04964	Proximal tubule bicarbonate reclamation	1
Sporomusaceae	map01120	Microbial metabolism in diverse environments	3			Marinilabiliaceae	map03010	Ribosome	1
Sporomusaceae	map01200	Carbon metabolism	3			Methanomicrobiaceae	map03018	RNA degradation	1
Streptococcaceae	map02020	Two-component system	1			Methanomicrobiaceae	map04212	Longevity regulating pathway - worm	1
Streptococcaceae	map02040	Flagellar assembly	1			Methanomicrobiaceae	map05152	Tuberculosis	1
Streptococcaceae	map04621	NOD-like receptor signaling pathway	1			Methanothermaceae	map00511	Other glycan degradation	1
Streptococcaceae	map04626	Plant-pathogen interaction	1			Methanothermaceae	map00550	Peptidoglycan biosynthesis	1
Streptococcaceae	map05132	Salmonella infection	1			Methanothermaceae	map01100	Metabolic pathways	1
Streptococcaceae	map05134	Legionellosis	1			Methanothermaceae	map01502	Vancomycin resistance	1
Strophariaceae	map00010	Glycolysis / Gluconeogenesis	1			Methanothermaceae	map02020	Two-component system	1
Strophariaceae	map00020	Citrate cycle (TCA cycle)	1			Methanothermaceae	map05100	Bacterial invasion of epithelial cells	1
Strophariaceae	map00620	Pyruvate metabolism	1			Metschnikowiaceae	map00071	Fatty acid degradation	1
Strophariaceae	map00650	Butanoate metabolism	1			Metschnikowiaceae	map00072		1
Strophariaceae	map00720	Carbon fixation pathways in prokaryotes	1			Metschnikowiaceae	map00280	Valine, leucine and isoleucine degradation	1
Strophariaceae	map01100	Metabolic pathways	1			Metschnikowiaceae	map00310	Lysine degradation	1
Strophariaceae	map01120	Microbial metabolism in diverse environments	1			Metschnikowiaceae	map00362	Benzoate degradation	1
Strophariaceae	map01130		1			Metschnikowiaceae	map00380	Tryptophan metabolism	1
Strophariaceae	map01200	Carbon metabolism	1			Metschnikowiaceae	map00620	Pyruvate metabolism	1
Syntrophaceae	map03018	RNA degradation	1			Metschnikowiaceae	map00630	Glyoxylate and dicarboxylate metabolism	1
Syntrophaceae	map04212	Longevity regulating pathway - worm	1			Metschnikowiaceae	map00640	Propanoate metabolism	1
Syntrophaceae	map04940	Type I diabetes mellitus	1			Metschnikowiaceae	map00650	Butanoate metabolism	1
Syntrophaceae	map05134	Legionellosis	1			Metschnikowiaceae	map00720	Carbon fixation pathways in prokaryotes	1
Syntrophaceae	map05152	Tuberculosis	1			Metschnikowiaceae	map00900	Terpenoid backbone biosynthesis	1
Tannerellaceae	map00010	Glycolysis / Gluconeogenesis	1			Metschnikowiaceae	map01100	Metabolic pathways	1
Tannerellaceae	map00680	Methane metabolism	1			Metschnikowiaceae	map01110	Biosynthesis of secondary metabolites	1
Tannerellaceae	map01100	Metabolic pathways	1			Metschnikowiaceae	map01120	Microbial metabolism in diverse environments	1
Tannerellaceae	map01110	Biosynthesis of secondary metabolites	1			Metschnikowiaceae	map01130		1
Tannerellaceae	map01120	Microbial metabolism in diverse environments	1			Metschnikowiaceae	map01200	Carbon metabolism	1
Tannerellaceae	map01130		1			Metschnikowiaceae	map01212	Fatty acid metabolism	1
Tannerellaceae	map01200	Carbon metabolism	1			Metschnikowiaceae	map02020	Two-component system	1
Tannerellaceae	map01230	Biosynthesis of amino acids	1			Microbacteriaceae	map00010	Glycolysis / Gluconeogenesis	1
Tannerellaceae	map03018	RNA degradation	1			Microbacteriaceae	map00680	Methane metabolism	1
Tannerellaceae	map04066	HIF-1 signaling pathway	1			Microbacteriaceae	map01100	Metabolic pathways	1
Trypanosomatidae	map00010	Glycolysis / Gluconeogenesis	1			Microbacteriaceae	map01110	Biosynthesis of secondary metabolites	1
Trypanosomatidae	map00710	Carbon fixation in photosynthetic organisms	1			Microbacteriaceae	map01120	Microbial metabolism in diverse environments	1
Trypanosomatidae	map01100	Metabolic pathways	1			Microbacteriaceae	map01130		1
Trypanosomatidae	map01110	Biosynthesis of secondary metabolites	1			Microbacteriaceae	map01200	Carbon metabolism	1
Trypanosomatidae	map01120	Microbial metabolism in diverse environments	1			Microbacteriaceae	map01230	Biosynthesis of amino acids	1
Trypanosomatidae	map01130		1			Microbacteriaceae	map01501	beta-Lactam resistance	3
Trypanosomatidae	map01200	Carbon metabolism	1			Microbacteriaceae	map02010	ABC transporters	3
Trypanosomatidae	map01230	Biosynthesis of amino acids	1			Microbacteriaceae	map02024	Quorum sensing	3
Trypanosomatidae	map04066	HIF-1 signaling pathway	1			Microbacteriaceae	map03018	RNA degradation	1
Trypanosomatidae	map05010	Alzheimer disease	1			Microbacteriaceae	map04066	HIF-1 signaling pathway	1
Vibrionaceae	map00230	Purine metabolism	1			Microcoleaceae	map02010	ABC transporters	2
Vibrionaceae	map00240	Pyrimidine metabolism	1			Mycoplasmataceae	map02020	Two-component system	1
Vibrionaceae	map00760	Nicotinate and nicotinamide metabolism	1			Mycoplasmataceae	map02040	Flagellar assembly	1
Vibrionaceae	map01100	Metabolic pathways	1			Mycoplasmataceae	map04621	NOD-like receptor signaling pathway	1
Vibrionaceae	map01110	Biosynthesis of secondary metabolites	1			Mycoplasmataceae	map04626	Plant-pathogen interaction	1
Vibrionaceae	map02020	Two-component system	1			Mycoplasmataceae	map05132	Salmonella infection	1
Vibrionaceae	map02040	Flagellar assembly	1			Mycoplasmataceae	map05134	Legionellosis	1
Vibrionaceae	map04621	NOD-like receptor signaling pathway	1			Myoviridae	map00920	Sulfur metabolism	2
Vibrionaceae	map04626	Plant-pathogen interaction	1			Myoviridae	map01120	Microbial metabolism in diverse environments	2
Vibrionaceae	map05132	Salmonella infection	1			Neisseriaceae	map00220	Arginine biosynthesis	1
Vibrionaceae	map05134	Legionellosis	1			Neisseriaceae	map00250	Alanine, aspartate and glutamate metabolism	1
Weeksellaceae	map03018	RNA degradation	1			Neisseriaceae	map00471		1
Weeksellaceae	map04212	Longevity regulating pathway - worm	1			Neisseriaceae	map00910	Nitrogen metabolism	1
Weeksellaceae	map04940	Type I diabetes mellitus	1			Neisseriaceae	map01100	Metabolic pathways	1
Weeksellaceae	map05134	Legionellosis	1			Neisseriaceae	map01200	Carbon metabolism	1
Weeksellaceae	map05152	Tuberculosis	1			Neisseriaceae	map04217	Necroptosis	1
Xanthomonadaceae	map00071	Fatty acid degradation	2			Neisseriaceae	map04964	Proximal tubule bicarbonate reclamation	1
Xanthomonadaceae	map00072		2			Niphatidae	map02020	Two-component system	3
Xanthomonadaceae	map00280	Valine, leucine and isoleucine degradation	2			Niphatidae	map02040	Flagellar assembly	3
Xanthomonadaceae	map00310	Lysine degradation	2			Niphatidae	map04621	NOD-like receptor signaling pathway	3
Xanthomonadaceae	map00362	Benzoate degradation	2			Niphatidae	map04626	Plant-pathogen interaction	3
Xanthomonadaceae	map00380	Tryptophan metabolism	2			Niphatidae	map05132	Salmonella infection	3
Xanthomonadaceae	map00620	Pyruvate metabolism	2			Niphatidae	map05134	Legionellosis	3
Xanthomonadaceae	map00630	Glyoxylate and dicarboxylate metabolism	2			Nitrosomonadaceae	map02020	Two-component system	1
Xanthomonadaceae	map00640	Propanoate metabolism	2			Nitrosomonadaceae	map02040	Flagellar assembly	1
Xanthomonadaceae	map00650	Butanoate metabolism	2			Nitrosomonadaceae	map04621	NOD-like receptor signaling pathway	1
Xanthomonadaceae	map00680	Methane metabolism	2			Nitrosomonadaceae	map04626	Plant-pathogen interaction	1
Xanthomonadaceae	map00720	Carbon fixation pathways in prokaryotes	4			Nitrosomonadaceae	map05132	Salmonella infection	1
Xanthomonadaceae	map00900	Terpenoid backbone biosynthesis	2			Nitrosomonadaceae	map05134	Legionellosis	1
Xanthomonadaceae	map01100	Metabolic pathways	2			Nitrososphaeraceae	map02020	Two-component system	1
Xanthomonadaceae	map01110	Biosynthesis of secondary metabolites	2			Nitrososphaeraceae	map02040	Flagellar assembly	1
Xanthomonadaceae	map01120	Microbial metabolism in diverse environments	4			Nitrososphaeraceae	map04621	NOD-like receptor signaling pathway	1
Xanthomonadaceae	map01130		2			Nitrososphaeraceae	map04626	Plant-pathogen interaction	1
Xanthomonadaceae	map01200	Carbon metabolism	4			Nitrososphaeraceae	map05132	Salmonella infection	1
Xanthomonadaceae	map01212	Fatty acid metabolism	2			Nitrososphaeraceae	map05134	Legionellosis	1
Xanthomonadaceae	map02020	Two-component system	3			Nitrospiraceae	map00670	One carbon pool by folate	2
Xanthomonadaceae	map02040	Flagellar assembly	1			Nitrospiraceae	map00720	Carbon fixation pathways in prokaryotes	2
Xanthomonadaceae	map04621	NOD-like receptor signaling pathway	1			Nitrospiraceae	map01100	Metabolic pathways	2
Xanthomonadaceae	map04626	Plant-pathogen interaction	1			Nitrospiraceae	map01120	Microbial metabolism in diverse environments	2
Xanthomonadaceae	map05132	Salmonella infection	1			Nitrospiraceae	map01200	Carbon metabolism	2
Xanthomonadaceae	map05134	Legionellosis	1			Oceanospirillaceae	map00220	Arginine biosynthesis	1
						Oceanospirillaceae	map00250	Alanine, aspartate and glutamate metabolism	1
						Oceanospirillaceae	map00270	Cysteine and methionine metabolism	1
						Oceanospirillaceae	map00330	Arginine and proline metabolism	1
						Oceanospirillaceae	map00350	Tyrosine metabolism	1
						Oceanospirillaceae	map00360	Phenylalanine metabolism	1
						Oceanospirillaceae	map00400	Phenylalanine, tyrosine and tryptophan biosynthesis	1
						Oceanospirillaceae	map00401	Novobiocin biosynthesis	1
						Oceanospirillaceae	map00950	Isoquinoline alkaloid biosynthesis	1
						Oceanospirillaceae	map00960	Tropane, piperidine and pyridine alkaloid biosynthesis	1
						Oceanospirillaceae	map01100	Metabolic pathways	1
						Oceanospirillaceae	map01110	Biosynthesis of secondary metabolites	1
						Oceanospirillaceae	map01130		1
						Oceanospirillaceae	map01210	2-Oxocarboxylic acid metabolism	1
						Oceanospirillaceae	map01230	Biosynthesis of amino acids	1
						Odoribacteraceae	map03010	Ribosome	4
						Opisthorchiidae	map00230	Purine metabolism	1
						Opisthorchiidae	map00240	Pyrimidine metabolism	1
						Opisthorchiidae	map00511	Other glycan degradation	1
						Opisthorchiidae	map00550	Peptidoglycan biosynthesis	1
						Opisthorchiidae	map00730	Thiamine metabolism	1
						Opisthorchiidae	map00760	Nicotinate and nicotinamide metabolism	1
						Opisthorchiidae	map00790	Folate biosynthesis	1
						Opisthorchiidae	map01100	Metabolic pathways	2
						Opisthorchiidae	map01110	Biosynthesis of secondary metabolites	1
						Opisthorchiidae	map01502	Vancomycin resistance	1
						Opisthorchiidae	map02020	Two-component system	2
						Opisthorchiidae	map05100	Bacterial invasion of epithelial cells	1
						Oscillospiraceae	map00010	Glycolysis / Gluconeogenesis	36
						Oscillospiraceae	map00020	Citrate cycle (TCA cycle)	24
						Oscillospiraceae	map00030	Pentose phosphate pathway	4
						Oscillospiraceae	map00051	Fructose and mannose metabolism	5
						Oscillospiraceae	map00052	Galactose metabolism	1
						Oscillospiraceae	map00071	Fatty acid degradation	7
						Oscillospiraceae	map00072		5
						Oscillospiraceae	map00190	Oxidative phosphorylation	15
						Oscillospiraceae	map00230	Purine metabolism	2
						Oscillospiraceae	map00240	Pyrimidine metabolism	2
						Oscillospiraceae	map00250	Alanine, aspartate and glutamate metabolism	11
						Oscillospiraceae	map00270	Cysteine and methionine metabolism	1
						Oscillospiraceae	map00280	Valine, leucine and isoleucine degradation	8
						Oscillospiraceae	map00290	Valine, leucine and isoleucine biosynthesis	1
						Oscillospiraceae	map00310	Lysine degradation	5
						Oscillospiraceae	map00330	Arginine and proline metabolism	2
						Oscillospiraceae	map00360	Phenylalanine metabolism	2
						Oscillospiraceae	map00362	Benzoate degradation	9
						Oscillospiraceae	map00380	Tryptophan metabolism	7
						Oscillospiraceae	map00511	Other glycan degradation	7
						Oscillospiraceae	map00550	Peptidoglycan biosynthesis	7
						Oscillospiraceae	map00562	Inositol phosphate metabolism	4
						Oscillospiraceae	map00620	Pyruvate metabolism	35
						Oscillospiraceae	map00630	Glyoxylate and dicarboxylate metabolism	5
						Oscillospiraceae	map00640	Propanoate metabolism	5
						Oscillospiraceae	map00650	Butanoate metabolism	11
						Oscillospiraceae	map00680	Methane metabolism	1
						Oscillospiraceae	map00710	Carbon fixation in photosynthetic organisms	43
						Oscillospiraceae	map00720	Carbon fixation pathways in prokaryotes	12
						Oscillospiraceae	map00770	Pantothenate and CoA biosynthesis	1
						Oscillospiraceae	map00790	Folate biosynthesis	1
						Oscillospiraceae	map00900	Terpenoid backbone biosynthesis	9
						Oscillospiraceae	map00910	Nitrogen metabolism	9
						Oscillospiraceae	map01051	Biosynthesis of ansamycins	3
						Oscillospiraceae	map01100	Metabolic pathways	94
						Oscillospiraceae	map01110	Biosynthesis of secondary metabolites	59
						Oscillospiraceae	map01120	Microbial metabolism in diverse environments	65
						Oscillospiraceae	map01130		58
						Oscillospiraceae	map01200	Carbon metabolism	52
						Oscillospiraceae	map01210	2-Oxocarboxylic acid metabolism	1
						Oscillospiraceae	map01212	Fatty acid metabolism	7
						Oscillospiraceae	map01220	Degradation of aromatic compounds	2
						Oscillospiraceae	map01230	Biosynthesis of amino acids	24
						Oscillospiraceae	map01502	Vancomycin resistance	7
						Oscillospiraceae	map02010	ABC transporters	11
						Oscillospiraceae	map02020	Two-component system	57
						Oscillospiraceae	map02024	Quorum sensing	1
						Oscillospiraceae	map02030	Bacterial chemotaxis	2
						Oscillospiraceae	map02040	Flagellar assembly	45
						Oscillospiraceae	map03010	Ribosome	42
						Oscillospiraceae	map03018	RNA degradation	9
						Oscillospiraceae	map04066	HIF-1 signaling pathway	7
						Oscillospiraceae	map04212	Longevity regulating pathway - worm	9
						Oscillospiraceae	map04621	NOD-like receptor signaling pathway	45
						Oscillospiraceae	map04626	Plant-pathogen interaction	45
						Oscillospiraceae	map04940	Type I diabetes mellitus	9
						Oscillospiraceae	map05010	Alzheimer disease	7
						Oscillospiraceae	map05100	Bacterial invasion of epithelial cells	7
						Oscillospiraceae	map05132	Salmonella infection	45
						Oscillospiraceae	map05134	Legionellosis	54
						Oscillospiraceae	map05152	Tuberculosis	9
						Oxalobacteraceae	map00620	Pyruvate metabolism	1
						Oxalobacteraceae	map00650	Butanoate metabolism	1
						Oxalobacteraceae	map01100	Metabolic pathways	1
						Oxalobacteraceae	map01120	Microbial metabolism in diverse environments	1
						Paenibacillaceae	map02010	ABC transporters	4
						Paenibacillaceae	map02020	Two-component system	1
						Paenibacillaceae	map02040	Flagellar assembly	1
						Paenibacillaceae	map03010	Ribosome	1
						Paenibacillaceae	map04621	NOD-like receptor signaling pathway	1
						Paenibacillaceae	map04626	Plant-pathogen interaction	1
						Paenibacillaceae	map05132	Salmonella infection	1
						Paenibacillaceae	map05134	Legionellosis	1
						Pasteurellaceae	map00220	Arginine biosynthesis	2
						Pasteurellaceae	map00250	Alanine, aspartate and glutamate metabolism	2
						Pasteurellaceae	map00910	Nitrogen metabolism	2
						Pasteurellaceae	map01100	Metabolic pathways	2
						Peptococcaceae	map00620	Pyruvate metabolism	1
						Peptococcaceae	map00670	One carbon pool by folate	3
						Peptococcaceae	map00710	Carbon fixation in photosynthetic organisms	1
						Peptococcaceae	map00720	Carbon fixation pathways in prokaryotes	4
						Peptococcaceae	map01100	Metabolic pathways	4
						Peptococcaceae	map01120	Microbial metabolism in diverse environments	4
						Peptococcaceae	map01200	Carbon metabolism	4
						Peptoniphilaceae	map02020	Two-component system	2
						Peptoniphilaceae	map02040	Flagellar assembly	2
						Peptoniphilaceae	map04621	NOD-like receptor signaling pathway	2
						Peptoniphilaceae	map04626	Plant-pathogen interaction	2
						Peptoniphilaceae	map05132	Salmonella infection	2
						Peptoniphilaceae	map05134	Legionellosis	2
						Peptostreptococcaceae	map00010	Glycolysis / Gluconeogenesis	1
						Peptostreptococcaceae	map00051	Fructose and mannose metabolism	1
						Peptostreptococcaceae	map00071	Fatty acid degradation	2
						Peptostreptococcaceae	map00260	Glycine, serine and threonine metabolism	2
						Peptostreptococcaceae	map00280	Valine, leucine and isoleucine degradation	2
						Peptostreptococcaceae	map00562	Inositol phosphate metabolism	1
						Peptostreptococcaceae	map00650	Butanoate metabolism	2
						Peptostreptococcaceae	map00680	Methane metabolism	2
						Peptostreptococcaceae	map00710	Carbon fixation in photosynthetic organisms	1
						Peptostreptococcaceae	map01100	Metabolic pathways	5
						Peptostreptococcaceae	map01110	Biosynthesis of secondary metabolites	3
						Peptostreptococcaceae	map01120	Microbial metabolism in diverse environments	5
						Peptostreptococcaceae	map01130		3
						Peptostreptococcaceae	map01200	Carbon metabolism	5
						Peptostreptococcaceae	map01212	Fatty acid metabolism	2
						Peptostreptococcaceae	map01230	Biosynthesis of amino acids	3
						Perkinsidae	map00010	Glycolysis / Gluconeogenesis	1
						Perkinsidae	map00020	Citrate cycle (TCA cycle)	1
						Perkinsidae	map00620	Pyruvate metabolism	1
						Perkinsidae	map00650	Butanoate metabolism	1
						Perkinsidae	map00720	Carbon fixation pathways in prokaryotes	1
						Perkinsidae	map01100	Metabolic pathways	1
						Perkinsidae	map01120	Microbial metabolism in diverse environments	1
						Perkinsidae	map01130		1
						Perkinsidae	map01200	Carbon metabolism	1
						Pirellulaceae	map02010	ABC transporters	1
						Pirellulaceae	map02030	Bacterial chemotaxis	1
						Pleosporaceae	map00650	Butanoate metabolism	1
						Pleosporaceae	map01200	Carbon metabolism	1
						Porphyromonadaceae	map00010	Glycolysis / Gluconeogenesis	2
						Porphyromonadaceae	map00020	Citrate cycle (TCA cycle)	1
						Porphyromonadaceae	map00030	Pentose phosphate pathway	1
						Porphyromonadaceae	map00500	Starch and sucrose metabolism	1
						Porphyromonadaceae	map00620	Pyruvate metabolism	1
						Porphyromonadaceae	map00650	Butanoate metabolism	1
						Porphyromonadaceae	map00710	Carbon fixation in photosynthetic organisms	2
						Porphyromonadaceae	map00720	Carbon fixation pathways in prokaryotes	1
						Porphyromonadaceae	map00760	Nicotinate and nicotinamide metabolism	1
						Porphyromonadaceae	map01051	Biosynthesis of ansamycins	1
						Porphyromonadaceae	map01100	Metabolic pathways	5
						Porphyromonadaceae	map01110	Biosynthesis of secondary metabolites	3
						Porphyromonadaceae	map01120	Microbial metabolism in diverse environments	3
						Porphyromonadaceae	map01130		3
						Porphyromonadaceae	map01200	Carbon metabolism	3
						Porphyromonadaceae	map01230	Biosynthesis of amino acids	2
						Porphyromonadaceae	map02026	Biofilm formation - Escherichia coli	1
						Porphyromonadaceae	map03010	Ribosome	2
						Porphyromonadaceae	map03018	RNA degradation	1
						Porphyromonadaceae	map04066	HIF-1 signaling pathway	1
						Porphyromonadaceae	map04212	Longevity regulating pathway - worm	1
						Porphyromonadaceae	map04217	Necroptosis	1
						Porphyromonadaceae	map04910	Insulin signaling pathway	1
						Porphyromonadaceae	map04922	Glucagon signaling pathway	1
						Porphyromonadaceae	map04931	Insulin resistance	1
						Porphyromonadaceae	map05010	Alzheimer disease	1
						Porphyromonadaceae	map05152	Tuberculosis	1
						Prevotellaceae	map00010	Glycolysis / Gluconeogenesis	26
						Prevotellaceae	map00020	Citrate cycle (TCA cycle)	15
						Prevotellaceae	map00030	Pentose phosphate pathway	2
						Prevotellaceae	map00040	Pentose and glucuronate interconversions	6
						Prevotellaceae	map00051	Fructose and mannose metabolism	9
						Prevotellaceae	map00061	Fatty acid biosynthesis	1
						Prevotellaceae	map00120	Primary bile acid biosynthesis	1
						Prevotellaceae	map00121	Secondary bile acid biosynthesis	1
						Prevotellaceae	map00190	Oxidative phosphorylation	8
						Prevotellaceae	map00220	Arginine biosynthesis	4
						Prevotellaceae	map00230	Purine metabolism	1
						Prevotellaceae	map00240	Pyrimidine metabolism	1
						Prevotellaceae	map00250	Alanine, aspartate and glutamate metabolism	5
						Prevotellaceae	map00260	Glycine, serine and threonine metabolism	1
						Prevotellaceae	map00270	Cysteine and methionine metabolism	2
						Prevotellaceae	map00333	Prodigiosin biosynthesis	1
						Prevotellaceae	map00410	beta-Alanine metabolism	1
						Prevotellaceae	map00430	Taurine and hypotaurine metabolism	1
						Prevotellaceae	map00500	Starch and sucrose metabolism	3
						Prevotellaceae	map00562	Inositol phosphate metabolism	6
						Prevotellaceae	map00600	Sphingolipid metabolism	1
						Prevotellaceae	map00620	Pyruvate metabolism	7
						Prevotellaceae	map00630	Glyoxylate and dicarboxylate metabolism	2
						Prevotellaceae	map00650	Butanoate metabolism	13
						Prevotellaceae	map00680	Methane metabolism	13
						Prevotellaceae	map00710	Carbon fixation in photosynthetic organisms	15
						Prevotellaceae	map00720	Carbon fixation pathways in prokaryotes	14
						Prevotellaceae	map00750	Vitamin B6 metabolism	1
						Prevotellaceae	map00780	Biotin metabolism	1
						Prevotellaceae	map00910	Nitrogen metabolism	5
						Prevotellaceae	map01040	Biosynthesis of unsaturated fatty acids	1
						Prevotellaceae	map01100	Metabolic pathways	53
						Prevotellaceae	map01110	Biosynthesis of secondary metabolites	36
						Prevotellaceae	map01120	Microbial metabolism in diverse environments	38
						Prevotellaceae	map01130		38
						Prevotellaceae	map01200	Carbon metabolism	37
						Prevotellaceae	map01212	Fatty acid metabolism	1
						Prevotellaceae	map01230	Biosynthesis of amino acids	22
						Prevotellaceae	map02024	Quorum sensing	1
						Prevotellaceae	map02026	Biofilm formation - Escherichia coli	3
						Prevotellaceae	map03010	Ribosome	63
						Prevotellaceae	map03018	RNA degradation	10
						Prevotellaceae	map03020	RNA polymerase	1
						Prevotellaceae	map04066	HIF-1 signaling pathway	11
						Prevotellaceae	map04071	Sphingolipid signaling pathway	1
						Prevotellaceae	map04212	Longevity regulating pathway - worm	1
						Prevotellaceae	map04217	Necroptosis	3
						Prevotellaceae	map04727	GABAergic synapse	1
						Prevotellaceae	map04910	Insulin signaling pathway	3
						Prevotellaceae	map04922	Glucagon signaling pathway	3
						Prevotellaceae	map04931	Insulin resistance	3
						Prevotellaceae	map04940	Type I diabetes mellitus	1
						Prevotellaceae	map05010	Alzheimer disease	2
						Prevotellaceae	map05134	Legionellosis	6
						Prevotellaceae	map05152	Tuberculosis	1
						Pseudomonadaceae	map00010	Glycolysis / Gluconeogenesis	1
						Pseudomonadaceae	map00020	Citrate cycle (TCA cycle)	1
						Pseudomonadaceae	map00052	Galactose metabolism	2
						Pseudomonadaceae	map00511	Other glycan degradation	2
						Pseudomonadaceae	map00600	Sphingolipid metabolism	2
						Pseudomonadaceae	map00620	Pyruvate metabolism	1
						Pseudomonadaceae	map00650	Butanoate metabolism	1
						Pseudomonadaceae	map00720	Carbon fixation pathways in prokaryotes	1
						Pseudomonadaceae	map01100	Metabolic pathways	3
						Pseudomonadaceae	map01120	Microbial metabolism in diverse environments	1
						Pseudomonadaceae	map01130		1
						Pseudomonadaceae	map01200	Carbon metabolism	1
						Pteromalidae	map02020	Two-component system	1
						Pteromalidae	map02040	Flagellar assembly	1
						Pteromalidae	map04621	NOD-like receptor signaling pathway	1
						Pteromalidae	map04626	Plant-pathogen interaction	1
						Pteromalidae	map05132	Salmonella infection	1
						Pteromalidae	map05134	Legionellosis	1
						Pucciniaceae	map02020	Two-component system	2
						Pucciniaceae	map02040	Flagellar assembly	2
						Pucciniaceae	map04621	NOD-like receptor signaling pathway	2
						Pucciniaceae	map04626	Plant-pathogen interaction	2
						Pucciniaceae	map05132	Salmonella infection	2
						Pucciniaceae	map05134	Legionellosis	2
						Pyrinomonadaceae	map03018	RNA degradation	1
						Pyrinomonadaceae	map04212	Longevity regulating pathway - worm	1
						Pyrinomonadaceae	map05152	Tuberculosis	1
						Raperosteliaceae	map00480	Glutathione metabolism	1
						Raperosteliaceae	map01100	Metabolic pathways	1
						Retroviridae	map02010	ABC transporters	1
						Rhizobiaceae	map00010	Glycolysis / Gluconeogenesis	1
						Rhizobiaceae	map00071	Fatty acid degradation	1
						Rhizobiaceae	map00072		1
						Rhizobiaceae	map00230	Purine metabolism	1
						Rhizobiaceae	map00280	Valine, leucine and isoleucine degradation	1
						Rhizobiaceae	map00310	Lysine degradation	1
						Rhizobiaceae	map00362	Benzoate degradation	1
						Rhizobiaceae	map00380	Tryptophan metabolism	1
						Rhizobiaceae	map00620	Pyruvate metabolism	2
						Rhizobiaceae	map00630	Glyoxylate and dicarboxylate metabolism	1
						Rhizobiaceae	map00640	Propanoate metabolism	1
						Rhizobiaceae	map00650	Butanoate metabolism	1
						Rhizobiaceae	map00720	Carbon fixation pathways in prokaryotes	1
						Rhizobiaceae	map00900	Terpenoid backbone biosynthesis	1
						Rhizobiaceae	map01100	Metabolic pathways	2
						Rhizobiaceae	map01110	Biosynthesis of secondary metabolites	2
						Rhizobiaceae	map01120	Microbial metabolism in diverse environments	2
						Rhizobiaceae	map01130		2
						Rhizobiaceae	map01200	Carbon metabolism	2
						Rhizobiaceae	map01212	Fatty acid metabolism	1
						Rhizobiaceae	map01230	Biosynthesis of amino acids	1
						Rhizobiaceae	map02020	Two-component system	1
						Rhizobiaceae	map04922	Glucagon signaling pathway	1
						Rhizobiaceae	map04930	Type II diabetes mellitus	1
						Rhizobiaceae	map05165	Human papillomavirus infection	1
						Rhizobiaceae	map05203	Viral carcinogenesis	1
						Rhizobiaceae	map05230	Central carbon metabolism in cancer	1
						Rhodobacteraceae	map00052	Galactose metabolism	1
						Rhodobacteraceae	map00220	Arginine biosynthesis	2
						Rhodobacteraceae	map00250	Alanine, aspartate and glutamate metabolism	2
						Rhodobacteraceae	map00471		2
						Rhodobacteraceae	map00520	Amino sugar and nucleotide sugar metabolism	1
						Rhodobacteraceae	map00910	Nitrogen metabolism	2
						Rhodobacteraceae	map01100	Metabolic pathways	3
						Rhodobacteraceae	map01200	Carbon metabolism	2
						Rhodobacteraceae	map02020	Two-component system	1
						Rhodobacteraceae	map02024	Quorum sensing	5
						Rhodobacteraceae	map02040	Flagellar assembly	2
						Rhodobacteraceae	map04217	Necroptosis	2
						Rhodobacteraceae	map04621	NOD-like receptor signaling pathway	1
						Rhodobacteraceae	map04626	Plant-pathogen interaction	1
						Rhodobacteraceae	map04964	Proximal tubule bicarbonate reclamation	2
						Rhodobacteraceae	map05132	Salmonella infection	1
						Rhodobacteraceae	map05134	Legionellosis	1
						Rhodospirillaceae	map00564	Glycerophospholipid metabolism	1
						Rhodospirillaceae	map01100	Metabolic pathways	1
						Rhodospirillaceae	map01110	Biosynthesis of secondary metabolites	1
						Rikenellaceae	map00010	Glycolysis / Gluconeogenesis	26
						Rikenellaceae	map00020	Citrate cycle (TCA cycle)	27
						Rikenellaceae	map00030	Pentose phosphate pathway	1
						Rikenellaceae	map00040	Pentose and glucuronate interconversions	2
						Rikenellaceae	map00051	Fructose and mannose metabolism	5
						Rikenellaceae	map00061	Fatty acid biosynthesis	1
						Rikenellaceae	map00190	Oxidative phosphorylation	5
						Rikenellaceae	map00220	Arginine biosynthesis	7
						Rikenellaceae	map00230	Purine metabolism	20
						Rikenellaceae	map00240	Pyrimidine metabolism	20
						Rikenellaceae	map00250	Alanine, aspartate and glutamate metabolism	7
						Rikenellaceae	map00260	Glycine, serine and threonine metabolism	7
						Rikenellaceae	map00270	Cysteine and methionine metabolism	3
						Rikenellaceae	map00500	Starch and sucrose metabolism	5
						Rikenellaceae	map00520	Amino sugar and nucleotide sugar metabolism	1
						Rikenellaceae	map00562	Inositol phosphate metabolism	3
						Rikenellaceae	map00620	Pyruvate metabolism	29
						Rikenellaceae	map00630	Glyoxylate and dicarboxylate metabolism	4
						Rikenellaceae	map00650	Butanoate metabolism	25
						Rikenellaceae	map00680	Methane metabolism	7
						Rikenellaceae	map00710	Carbon fixation in photosynthetic organisms	15
						Rikenellaceae	map00720	Carbon fixation pathways in prokaryotes	33
						Rikenellaceae	map00750	Vitamin B6 metabolism	2
						Rikenellaceae	map00780	Biotin metabolism	1
						Rikenellaceae	map00910	Nitrogen metabolism	7
						Rikenellaceae	map01100	Metabolic pathways	72
						Rikenellaceae	map01110	Biosynthesis of secondary metabolites	21
						Rikenellaceae	map01120	Microbial metabolism in diverse environments	43
						Rikenellaceae	map01130		37
						Rikenellaceae	map01200	Carbon metabolism	44
						Rikenellaceae	map01212	Fatty acid metabolism	1
						Rikenellaceae	map01230	Biosynthesis of amino acids	8
						Rikenellaceae	map01501	beta-Lactam resistance	1
						Rikenellaceae	map01503	Cationic antimicrobial peptide (CAMP) resistance	1
						Rikenellaceae	map02020	Two-component system	1
						Rikenellaceae	map02026	Biofilm formation - Escherichia coli	4
						Rikenellaceae	map03010	Ribosome	50
						Rikenellaceae	map03018	RNA degradation	14
						Rikenellaceae	map03020	RNA polymerase	11
						Rikenellaceae	map03030	DNA replication	1
						Rikenellaceae	map03070	Bacterial secretion system	1
						Rikenellaceae	map03430	Mismatch repair	1
						Rikenellaceae	map03440	Homologous recombination	1
						Rikenellaceae	map04066	HIF-1 signaling pathway	3
						Rikenellaceae	map04212	Longevity regulating pathway - worm	4
						Rikenellaceae	map04217	Necroptosis	4
						Rikenellaceae	map04626	Plant-pathogen interaction	1
						Rikenellaceae	map04910	Insulin signaling pathway	4
						Rikenellaceae	map04922	Glucagon signaling pathway	4
						Rikenellaceae	map04931	Insulin resistance	4
						Rikenellaceae	map04940	Type I diabetes mellitus	4
						Rikenellaceae	map05010	Alzheimer disease	1
						Rikenellaceae	map05133	Pertussis	1
						Rikenellaceae	map05134	Legionellosis	8
						Rikenellaceae	map05152	Tuberculosis	4
						Roseivirgaceae	map02010	ABC transporters	1
						Ruminococcaceae	map00010	Glycolysis / Gluconeogenesis	63
						Ruminococcaceae	map00020	Citrate cycle (TCA cycle)	21
						Ruminococcaceae	map00030	Pentose phosphate pathway	6
						Ruminococcaceae	map00040	Pentose and glucuronate interconversions	2
						Ruminococcaceae	map00051	Fructose and mannose metabolism	11
						Ruminococcaceae	map00053	Ascorbate and aldarate metabolism	1
						Ruminococcaceae	map00071	Fatty acid degradation	18
						Ruminococcaceae	map00072		2
						Ruminococcaceae	map00190	Oxidative phosphorylation	4
						Ruminococcaceae	map00220	Arginine biosynthesis	13
						Ruminococcaceae	map00250	Alanine, aspartate and glutamate metabolism	13
						Ruminococcaceae	map00280	Valine, leucine and isoleucine degradation	7
						Ruminococcaceae	map00310	Lysine degradation	3
						Ruminococcaceae	map00340	Histidine metabolism	1
						Ruminococcaceae	map00350	Tyrosine metabolism	11
						Ruminococcaceae	map00362	Benzoate degradation	6
						Ruminococcaceae	map00380	Tryptophan metabolism	2
						Ruminococcaceae	map00430	Taurine and hypotaurine metabolism	16
						Ruminococcaceae	map00460	Cyanoamino acid metabolism	8
						Ruminococcaceae	map00471		10
						Ruminococcaceae	map00480	Glutathione metabolism	8
						Ruminococcaceae	map00500	Starch and sucrose metabolism	10
						Ruminococcaceae	map00520	Amino sugar and nucleotide sugar metabolism	4
						Ruminococcaceae	map00562	Inositol phosphate metabolism	6
						Ruminococcaceae	map00620	Pyruvate metabolism	50
						Ruminococcaceae	map00625	Chloroalkane and chloroalkene degradation	11
						Ruminococcaceae	map00626	Naphthalene degradation	11
						Ruminococcaceae	map00630	Glyoxylate and dicarboxylate metabolism	3
						Ruminococcaceae	map00640	Propanoate metabolism	10
						Ruminococcaceae	map00643	Styrene degradation	5
						Ruminococcaceae	map00650	Butanoate metabolism	35
						Ruminococcaceae	map00680	Methane metabolism	17
						Ruminococcaceae	map00710	Carbon fixation in photosynthetic organisms	36
						Ruminococcaceae	map00720	Carbon fixation pathways in prokaryotes	30
						Ruminococcaceae	map00900	Terpenoid backbone biosynthesis	5
						Ruminococcaceae	map00910	Nitrogen metabolism	13
						Ruminococcaceae	map01051	Biosynthesis of ansamycins	3
						Ruminococcaceae	map01100	Metabolic pathways	136
						Ruminococcaceae	map01110	Biosynthesis of secondary metabolites	74
						Ruminococcaceae	map01120	Microbial metabolism in diverse environments	99
						Ruminococcaceae	map01130		71
						Ruminococcaceae	map01200	Carbon metabolism	79
						Ruminococcaceae	map01212	Fatty acid metabolism	7
						Ruminococcaceae	map01220	Degradation of aromatic compounds	15
						Ruminococcaceae	map01230	Biosynthesis of amino acids	34
						Ruminococcaceae	map02010	ABC transporters	32
						Ruminococcaceae	map02020	Two-component system	17
						Ruminococcaceae	map02024	Quorum sensing	19
						Ruminococcaceae	map02026	Biofilm formation - Escherichia coli	10
						Ruminococcaceae	map02030	Bacterial chemotaxis	9
						Ruminococcaceae	map02040	Flagellar assembly	15
						Ruminococcaceae	map03010	Ribosome	14
						Ruminococcaceae	map03018	RNA degradation	18
						Ruminococcaceae	map03030	DNA replication	5
						Ruminococcaceae	map03320	PPAR signaling pathway	9
[truncated: 225 more rows]

## Sheet: Genus
DDA-PASEF						DIA-PASEF
[truncated: 2,298 more rows]

[truncated: 1 more sheets: Species]
