# Supplementary material for: Increasing taxonomic and functional characterization of host-microbiome interactions by DIA-PASEF metaproteomics
Source: Front Microbiol. 2023 Oct 16;14:1258703. doi: 10.3389/fmicb.2023.1258703 (PMC10613666; doi:10.3389/fmicb.2023.1258703)
Supplement: Supplementary file 14 [file Table_7.XLSX]

## Sheet: Microbiota-Protein
Protein.Group	NV-284-14D	NV-284-Pre	NV-285-14D	NV-285-Pre	NV-291-14D	NV-291-Pre	NV-292-14D	NV-292-Pre	SHAM-257-14D	SHAM-257-Pre	SHAM-258-14D	SHAM-258-Pre	SHAM-514-14D	SHAM-514-Pre	SHAM-523-14D	SHAM-523-Pre	SNI-259-14D	SNI-259-Pre	SNI-260-14D	SNI-260-Pre	SNI-485-14D	SNI-485-Pre	SNI-509-14D	SNI-509-Pre
1_GL0003708;2-1_GL0047644;2-3_GL0095440;2-6_GL0045970;5-2_GL0029612;G1-1A_GL0068928	11.4751	NA	NA	NA	11.4718	NA	12.4103	NA	NA	NA	NA	11.2472	12.1213	11.3576	13.4225	NA	NA	NA	11.2545	NA	11.4724	NA	NA	NA
1_GL0003708;2-3_GL0095440;2-6_GL0045970;G1-1A_GL0068928	14.5155	NA	12.6334	12.6884	14.5129	13.5983	14.3598	12.5443	13.3563	12.4794	14.2697	15.2232	NA	14.2543	13.8336	13.1152	13.3303	NA	14.8503	15.5996	NA	13.3566	13.5134	NA
1_GL0004722;MH-0-3_GL0005477;S-Fe2_GL0170894	10.1996	NA	11.1333	11.3647	11.9686	11.856	11.4755	11.4964	11.7681	12.0654	12.6118	10.0221	10.899	11.8846	11.5468	12.9715	12.8396	10.7678	12.9815	NA	12.7994	12.0178	11.893	NA
1_GL0010544	NA	NA	NA	NA	12.0435	NA	11.4417	NA	NA	NA	NA	NA	NA	11.7219	11.7749	NA	NA	NA	NA	NA	NA	NA	NA	NA
1_GL0010544;2-6_GL0010329	11.9153	NA	NA	NA	11.9636	NA	13.1328	NA	NA	NA	NA	NA	NA	12.1153	13.0046	NA	NA	10.9201	NA	NA	NA	NA	NA	NA
1_GL0011591;8-1_GL0061360	17.0454	NA	13.9441	NA	NA	15.5255	NA	NA	NA	NA	NA	13.772	16.0922	NA	NA	NA	NA	NA	17.1031	NA	15.031	NA	NA	NA
1_GL0021401	13.1353	12.1976	11.8282	12.1462	12.937	NA	13.1504	NA	12.4051	NA	12.2192	NA	NA	13.058	12.4035	NA	10.0516	NA	14.0188	11.4286	NA	NA	NA	NA
1_GL0021401;5-7_GL0063732;6-1_GL0074586;7-7_GL0030347;8-1_GL0083080;8-5_GL0050759;G1-5A_GL0199126;MH-6-5_GL0077975;S-Fe20_GL0017193;S-Fe20_GL0032209;S-Fe20_GL0132538;S-Fe9_GL0048599	14.198	13.3532	13.1446	13.6061	14.6211	14.8448	15.6045	13.7537	14.171	12.6419	14.0673	13.7199	15.5603	14.7009	15.5028	13.0596	14.0601	13.5176	15.2504	14.0034	15.1503	15.5568	13.0184	12.7805
1_GL0021401;5-7_GL0063732;8-1_GL0083080;Group2-4A_GL0123968;S-Fe20_GL0132538;S-Fe20_GL0145210;S-Fe9_GL0048599	14.4609	13.5335	13.1138	14.3311	15.4044	14.3121	15.2638	13.769	14.808	11.566	15.0575	12.9046	17.1292	15.4278	16.6657	12.6199	13.1987	13.8233	17.3472	13.537	16.3783	15.9578	13.0282	11.7627
1_GL0021401;6-1_GL0074586	11.5922	10.7348	NA	10.9245	11.8913	NA	11.0917	NA	NA	NA	11.1972	NA	11.9951	12.0171	12.2795	NA	NA	NA	13.3271	NA	11.4848	11.3118	NA	NA
1_GL0021401;6-1_GL0074586;8-1_GL0083080	13.3504	12.8442	NA	12.2751	13.9243	NA	14.308	NA	13.7083	NA	NA	12.4366	14.7965	13.7533	14.063	12.6716	12.3276	NA	14.4235	13.2497	14.3399	NA	NA	NA
1_GL0021401;6-1_GL0074586;8-1_GL0083080;S-Fe20_GL0132538;S-Fe9_GL0048599	13.6194	12.5309	12.8449	11.5614	14.2271	12.8173	14.3227	NA	13.3052	NA	14.1737	11.9902	15.5561	14.3103	15.3474	12.0319	12.8197	13.2382	15.4137	13.2232	15.0012	13.1448	11.5396	9.4072
1_GL0021401;6-1_GL0074586;8-1_GL0083080;S-Fe9_GL0048599	NA	NA	NA	NA	11.2934	NA	10.7443	NA	NA	NA	NA	NA	11.6327	11.0156	11.5893	NA	NA	NA	12.439	NA	9.61121	NA	NA	NA
1_GL0021401;6-1_GL0074586;S-Fe20_GL0132538;S-Fe9_GL0048599	13.8913	12.7135	13.0894	12.2152	13.7543	11.4612	14.0513	11.6207	13.8381	11.0782	14.0826	13.0519	15.4987	13.9796	15.2517	12.0073	13.2113	13.7036	14.7491	12.9766	14.4215	11.2921	NA	10.2859
1_GL0021401;8-1_GL0083080;S-Fe9_GL0048599	11.1398	10.2996	10.0451	10.1129	11.7218	NA	12.2522	NA	10.775	NA	12.0467	NA	13.3716	12.0856	12.1742	9.74813	NA	NA	13.0962	10.2689	11.3864	10.7354	NA	NA
1_GL0023260;2-1_GL0104774;2-3_GL0095626;6-1_GL0020589;6-2_GL0087186;S-Fe3_GL0046395	13.5991	NA	11.6638	11.0824	13.2064	12.1372	13.5253	11.2091	12.0955	NA	12.994	13.076	13.5083	13.3322	14.1126	11.8016	11.7743	NA	13.3044	13.645	13.2892	11.7638	11.5813	11.4176
1_GL0029577	NA	NA	11.4638	NA	12.4198	12.8439	12.5182	11.5504	14.0065	11.3606	NA	NA	NA	12.7163	NA	10.7421	13.7211	12.169	NA	NA	13.3443	NA	NA	12.4684
1_GL0029577;2-2_GL0131392;2-5_GL0034294;5-3_GL0028392;Group2-4A_GL0000538	13.2747	13.4897	14.6728	13.4561	14.6758	14.5008	14.6639	14.3804	14.9966	15.3023	13.386	10.9936	14.2074	14.6799	13.1836	13.3176	14.6849	13.8446	13.5991	12.0961	14.315	11.1881	12.816	15.2043
1_GL0029577;2-2_GL0131392;2-5_GL0034294;Group2-4A_GL0000538	13.3089	13.7702	15.0897	13.5694	15.1594	15.3446	14.9623	15.162	15.2454	15.9502	13.9599	11.6071	14.7046	15.4424	13.4904	14.0183	15.4936	14.3901	13.198	12.4904	15.3422	11.7188	13.4731	15.761
1_GL0029577;2-5_GL0034294	NA	NA	NA	NA	14.3548	14.327	13.4433	NA	NA	NA	NA	NA	NA	14.438	11.1883	13.0801	15.7207	14.9727	NA	NA	17.3119	10.2216	NA	15.5429
1_GL0029577;2-5_GL0034294;5-3_GL0028392;Group2-4A_GL0000538	NA	NA	11.2976	9.73474	11.9348	12.5234	11.7888	10.5438	12.3821	13.0897	8.08493	NA	NA	12.0198	NA	9.95084	13.1884	12.0455	NA	9.39494	12.1728	NA	NA	12.5592
1_GL0029577;2-5_GL0034294;Group2-4A_GL0000538	NA	NA	14.5401	13.3608	15.0643	15.5477	14.4185	13.7652	15.0584	15.7884	13.8313	NA	NA	15.0164	NA	13.3622	16.383	14.7611	NA	11.8893	15.5037	NA	NA	15.9403
1_GL0029577;Group2-4A_GL0000538	NA	NA	15.0797	13.1333	13.7265	14.3902	13.8408	13.7946	15.1717	15.2104	NA	11.5935	NA	15.1644	11.924	13.6891	16.3484	14.3095	NA	11.2051	14.7187	NA	NA	16.1592
1_GL0032517;G1-1A_GL0003105;S-Fe10_GL0023669	13.0132	NA	9.06985	8.76955	12.0628	11.3111	12.1084	NA	NA	NA	11.4781	12.5246	NA	12.6147	NA	10.0458	10.8877	9.55022	12.9055	13.3992	NA	NA	NA	10.8515
1_GL0036429	14.8929	NA	13.8262	14.1348	14.635	13.0999	14.6231	15.4853	14.6722	14.1728	NA	14.8298	14.028	14.6557	16.2841	14.6309	NA	14.7656	14.2676	14.1372	13.5294	NA	12.8047	13.7786
1_GL0036429;3-7_GL0026613	NA	NA	NA	NA	NA	NA	NA	NA	NA	NA	NA	NA	NA	NA	13.8732	NA	NA	NA	NA	NA	NA	NA	NA	NA
1_GL0036429;47_GL0131083;54_GL0040206;Group2-8A_GL0049193;S-Fe5_GL0162239	NA	NA	NA	NA	NA	NA	NA	11.9047	NA	NA	NA	NA	NA	NA	NA	NA	NA	NA	NA	NA	NA	NA	NA	NA
1_GL0036429;Group2-8A_GL0049193	11.726	12.0546	13.4134	13.3585	13.2145	15.3485	14.1843	14.7143	12.8842	13.0317	11.2178	13.2067	13.5361	13.2032	14.6919	12.8982	12.0428	13.309	13.432	12.3149	10.8158	9.88871	10.1637	10.5959
1_GL0038377	13.6313	NA	NA	NA	NA	13.9487	NA	NA	NA	NA	NA	NA	NA	NA	NA	NA	NA	NA	NA	NA	NA	15.9046	NA	NA
1_GL0038377;2-1_GL0064618;2-3_GL0101170;6-2_GL0017794	14.3437	12.135	13.3539	12.9082	15.6314	13.5694	15.6829	12.9519	12.6176	NA	NA	NA	14.4033	15.7738	12.6791	NA	14.1397	NA	15.3942	NA	14.8267	11.7818	11.8665	14.9797
1_GL0038377;2-3_GL0101170	15.3565	NA	12.3191	12.0747	15.277	14.493	14.898	NA	12.5754	NA	14.7663	14.8168	NA	15.5184	NA	12.3616	12.4133	12.9989	15.6114	16.1217	14.1168	NA	NA	12.1143
1_GL0038377;2-3_GL0101170;34_GL0024708;6-2_GL0017794;G1-5A_GL0006982	18.8027	15.5623	15.1539	15.1215	16.4025	16.927	17.6288	16.3951	15.4256	14.0097	18.0216	17.5712	15.9035	16.477	15.9993	16.6112	15.2784	16.6373	18.4287	19.3341	16.7406	18.065	16.0635	16.872
1_GL0041992	NA	11.1903	NA	NA	NA	NA	NA	NA	NA	NA	11.5566	NA	NA	11.3356	NA	NA	NA	NA	NA	NA	NA	NA	NA	NA
1_GL0041992;20_GL0172070	NA	9.25581	NA	NA	10.4011	10.8987	10.0121	11.0701	10.1835	NA	9.772	10.853	11.0499	10.7917	10.7438	10.0355	9.80939	10.2609	11.4087	NA	10.3241	10.2408	9.05176	9.43855
1_GL0041992;20_GL0172070;8-5_GL0034441	NA	NA	NA	NA	13.6915	NA	NA	NA	13.101	NA	NA	NA	12.7684	13.1615	NA	NA	13.2916	NA	NA	NA	13.2286	NA	12.6796	12.336
1_GL0041992;8-5_GL0034441	13.9932	13.8449	12.9017	12.9155	15.017	14.1284	15.2374	14.2372	15.0191	13.5042	14.9123	14.8908	15.26	15.0483	14.5183	14.2979	13.9666	15.007	14.6576	14.6868	15.0459	12.3287	14.4627	13.917
1_GL0043524;2-1_GL0009760;2-1_GL0052492;2-2_GL0096312;2-3_GL0000168;2-3_GL0062071;2-3_GL0062072;2-3_GL0080940;2-3_GL0080941;2-7_GL0019013;2-8_GL0037621;2-8_GL0100524;2-8_GL0100526;28_GL0037869;2A-dyr16-07_GL0000620;3-2_GL0068898;3-5_GL0047916;49_GL0077775;5-3_GL0006268;5-3_GL0050893;7-1_GL0019247;G1-5A_GL0133398;Group2-4A_GL0005454;Group2-4A_GL0005459;S-Fe12_GL0075450;S-Fe12_GL0081748;S-Fe6_GL016…	12.0403	NA	NA	NA	11.3505	10.9856	12.0115	14.6549	NA	8.8488	11.9962	11.6397	11.3893	12.0804	11.6433	NA	NA	9.7608	11.6086	11.5105	11.4062	9.95393	NA	NA
1_GL0043524;2-3_GL0062059	NA	NA	NA	NA	NA	NA	NA	15.8176	NA	NA	NA	18.9179	NA	NA	NA	NA	NA	NA	NA	NA	NA	NA	NA	NA
1_GL0054117	12.3014	12.2915	14.0343	12.6117	13.3475	11.8788	11.1224	12.1443	12.3318	11.6673	13.8112	11.1568	12.8672	13.376	14.1078	11.568	12.8904	10.174	12.5396	12.1225	12.3709	12.2831	12.7514	NA
1_GL0064176;2-1_GL0073982;2-1_GL0087634;2-8_GL0087491;4-7_GL0147128;5-2_GL0102425;Group2-3A_GL0028885	15.9367	11.9067	14.6812	NA	17.1818	14.1019	14.7184	16.3156	15.8307	13.0578	16.1625	14.9919	17.4482	17.1245	16.7993	16.771	15.9279	14.4717	17.4534	16.8502	17.1599	16.2127	16.1623	15.8712
1_GL0064176;2-1_GL0087634;5-2_GL0102425	16.7231	NA	13.2342	NA	16.2353	15.1116	15.9499	14.6854	15.5995	NA	15.2867	16.8015	15.4293	16.3861	14.5274	14.6948	14.9528	14.9712	16.0054	16.7332	15.889	14.7195	14.6019	15.4857
1_GL0065332	NA	11.8304	NA	NA	NA	NA	NA	NA	NA	NA	NA	NA	14.2419	NA	13.5677	NA	NA	NA	13.5663	NA	13.4692	NA	NA	NA
1_GL0065332;6-6_GL0015877	11.5089	12.0606	11.1593	NA	12.1201	NA	11.9537	NA	11.9837	NA	11.9981	NA	13.3139	12.1716	12.7012	NA	NA	NA	13.2369	11.913	12.4616	NA	NA	NA
1_GL0086419;2-1_GL0024478	14.9833	13.8191	14.4829	14.0029	15.0235	13.9876	15.6093	NA	13.1225	NA	14.0833	NA	15.4314	15.1162	16.4327	14.722	NA	NA	NA	NA	15.4982	13.4486	NA	NA
1_GL0086419;2-1_GL0066566;G1-5A_GL0190133	NA	NA	NA	NA	14.1009	13.6615	12.9361	13.3178	14.0313	12.6797	NA	13.1295	13.7077	14.0953	12.8592	14.2972	13.7371	13.2432	13.955	NA	14.8431	13.0006	13.2617	13.3897
1_GL0086419;2-1_GL0121718	12.8801	NA	11.4088	NA	14.5816	12.295	13.2203	11.8801	14.0243	12.2124	13.846	13.6781	14.8692	14.6816	13.9429	14.2561	14.6623	12.856	15.37	14.798	14.8769	14.02	13.9886	12.5309
1_GL0086842;2-1_GL0103739;2-5_GL0069395;3-5_GL0040884;4-1_GL0068194;5-3_GL0111435;5-5_GL0069737;6-1_GL0096272;6-2_GL0036741;G1-1A_GL0051997;S-Fe12_GL0080717	NA	NA	NA	NA	NA	NA	NA	NA	14.5689	NA	NA	NA	NA	NA	NA	NA	NA	NA	NA	NA	NA	NA	NA	NA
1_GL0086842;2-1_GL0103739;G1-1A_GL0051997;S-Fe12_GL0080717	17.1545	NA	NA	NA	NA	NA	15.6788	13.5816	NA	NA	15.4146	16.9614	NA	NA	NA	NA	NA	NA	15.1274	16.506	NA	NA	NA	NA
1_GL0092558	NA	NA	NA	NA	NA	NA	NA	NA	NA	NA	NA	NA	NA	NA	NA	NA	9.98618	9.68168	NA	NA	9.59187	NA	NA	9.15999
1_GL0092558;2-1_GL0106075;2-5_GL0058789;5-5_GL0087530;G1-5A_GL0183250	17.4047	16.4078	17.3585	16.9593	17.2093	16.7594	18.3241	15.2864	17.5068	16.8895	17.1539	14.6047	17.7186	17.3741	17.5334	16.2695	14.7001	14.4676	NA	12.6095	16.9729	14.7168	NA	15.4233
1_GL0092558;2-1_GL0106075;2-5_GL0058789;G1-5A_GL0183250	13.2975	13.4688	12.2455	11.8474	13.7703	14.5047	14.4101	11.6933	13.0486	13.247	13.2086	NA	13.9435	13.3835	14.1508	12.6641	11.1023	11.2745	NA	NA	13.5594	12.2321	NA	12.1975
1_GL0092558;2-1_GL0106075;5-5_GL0087530;G1-5A_GL0183250	14.4635	13.815	15.2233	14.0764	14.1579	12.9512	14.7141	13.4086	15.0096	13.6338	14.565	12.3654	15.3217	14.1706	14.7771	14.2121	13.405	13.2291	NA	NA	14.3899	NA	NA	14.2277
1_GL0092558;2-5_GL0058789	NA	NA	NA	NA	15.5286	16.0323	16.1269	NA	16.1493	15.3987	NA	NA	NA	15.605	12.3362	13.0617	14.9437	14.4461	NA	NA	15.011	NA	NA	16.0807
1_GL0095036	16.899	15.0336	15.8202	14.7673	16.3389	15.7411	17.3129	15.4556	15.9279	13.5881	15.9473	13.8208	16.2121	16.0539	17.3314	16.4962	NA	NA	NA	NA	16.1554	14.8562	11.197	NA
1_GL0095036;2-1_GL0087638;6-6_GL0028101;G1-8A_GL0100514	17.256	13.0709	14.2233	13.7114	16.0342	15.2784	16.1288	NA	NA	14.3402	15.8471	NA	NA	16.1161	16.4046	15.6684	15.2901	14.8974	15.4693	16.9504	16.4505	14.5969	15.0078	14.9161
1_GL0095036;6-6_GL0028101;G1-8A_GL0100514	15.6101	NA	13.8974	NA	14.0639	14.2786	NA	14.4478	13.4173	NA	NA	15.0709	13.488	14.1863	NA	NA	NA	NA	14.0744	14.9435	14.0747	NA	NA	14.3367
1_GL0113163;5-7_GL0079241;8-5_GL0045610;MC-0-1_GL0097367;MC-0-1_GL0099489;S-Fe17_GL0006382;S-Fe20_GL0013758;S-Fe20_GL0020060	17.9144	NA	NA	15.7034	NA	18.546	19.4115	17.5387	NA	NA	17.4531	NA	NA	NA	18.8644	NA	NA	NA	18.7595	16.9671	19.0749	19.9631	NA	NA
1_GL0113163;8-5_GL0045610	NA	NA	NA	NA	10.7116	NA	12.452	11.6185	NA	NA	11.3451	NA	13.0985	10.65	12.4401	NA	NA	NA	11.8299	NA	11.9128	NA	NA	NA
1_GL0113163;8-5_GL0045610;MC-0-1_GL0097367	NA	NA	NA	NA	12.9965	12.4299	14.3089	NA	NA	NA	NA	NA	13.8465	13.8822	14.7456	NA	12.2077	NA	14.2419	NA	14.544	NA	NA	NA
1_GL0113163;8-5_GL0045610;S-Fe17_GL0006382;S-Fe20_GL0020060	15.1968	13.5378	13.9413	13.1344	14.9942	13.3526	15.8071	13.5427	15.3212	12.4709	15.138	13.5828	16.1318	15.0884	16.9114	13.4659	14.4937	14.8921	16.0943	13.7872	16.6548	12.2478	13.823	12.3118
1_GL0113163;MC-0-1_GL0097367;S-Fe17_GL0006382	12.7828	11.4503	11.092	10.9831	12.801	11.4112	13.991	11.8047	11.2819	NA	12.8308	10.246	12.7463	13.0477	13.8592	10.6037	11.2232	10.7045	14.0251	11.1825	13.6477	10.1322	10.4983	10.0255
1_GL0113163;S-Fe20_GL0020060	12.0039	11.1627	9.86544	10.8358	12.8082	NA	13.2703	NA	12.3962	NA	NA	NA	13.3102	12.8735	12.1883	NA	12.9788	12.0236	13.6856	NA	14.4655	NA	11.1433	NA
10_GL0000502	12.8936	12.4013	12.7709	12.4987	NA	12.7079	10.6008	12.6525	11.0598	NA	13.8478	NA	12.6562	11.7262	11.8956	NA	12.4536	10.3266	13.4616	12.8103	NA	12.2252	10.3666	NA
10_GL0000502;16_GL0092029;5-8_GL0080291;6-2_GL0003591;MC-0-1_GL0058727;MC-0-3_GL0020201;MC-6-1_GL0032534;MC-6-2_GL0176091;MH-0-4_GL0002636;S-Fe10_GL0041507;S-Fe10_GL0076296;S-Fe10_GL0164975;S-Fe1_GL0178399;S-Fe20_GL0111922	16.0416	NA	15.1178	NA	16.9261	15.9949	NA	NA	NA	14.3434	15.8575	NA	16.257	NA	NA	NA	14.7728	15.1399	NA	NA	NA	NA	NA	NA
10_GL0000502;16_GL0092029;5-8_GL0080291;6-2_GL0003591;MC-0-1_GL0058727;MC-0-3_GL0020201;MC-6-1_GL0032534;MH-0-4_GL0002636;S-Fe10_GL0041507;S-Fe10_GL0164975;S-Fe1_GL0178399;S-Fe20_GL0111922	16.9718	18.1419	17.9325	17.7493	17.0978	17.2716	16.0191	17.4347	17.0957	14.9186	17.4379	16.0168	18.2037	17.2032	17.784	15.7582	16.6715	16.0523	17.8937	16.6423	17.1242	17.7469	16.1337	15.4022
10_GL0000502;16_GL0092029;5-8_GL0080291;6-2_GL0003591;MC-0-3_GL0020201;MC-6-1_GL0032534;S-Fe10_GL0164975;S-Fe20_GL0111922	NA	NA	NA	NA	10.593	13.4191	11.6648	12.0233	10.7119	NA	10.3836	8.14531	12.1712	11.8817	9.59523	NA	12.4949	NA	12.3677	NA	10.5985	11.6561	10.5277	8.58198
10_GL0000502;5-8_GL0080291;MC-0-3_GL0020201;S-Fe10_GL0164975;S-Fe1_GL0178399	13.1902	12.9499	12.1786	12.905	NA	13.1424	10.8616	NA	NA	11.0691	11.7567	NA	13.8394	13.012	13.4796	NA	NA	NA	12.9092	12.3225	12.0129	13.582	11.1653	NA
10_GL0000502;6-2_GL0003591;MC-0-1_GL0058727;S-Fe1_GL0178399	13.164	13.7534	13.8961	13.428	12.1879	12.4654	11.4304	NA	11.797	NA	13.8057	NA	14.0253	11.997	13.654	NA	NA	11.3918	14.2097	12.1979	12.9866	12.975	NA	NA
10_GL0000502;MC-0-1_GL0058727;MC-6-2_GL0176091;MH-0-4_GL0002636;S-Fe10_GL0041507;S-Fe1_GL0178399	NA	NA	NA	NA	NA	14.5038	NA	NA	14.0104	NA	NA	NA	15.0165	NA	NA	NA	NA	NA	NA	NA	NA	15.0727	14.9081	NA
10_GL0000502;MC-0-1_GL0058727;MC-6-2_GL0176091;S-Fe10_GL0041507	NA	NA	NA	NA	15.6132	15.2489	13.5757	15.1947	14.7595	NA	NA	NA	15.489	15.7006	16.3048	15.2917	NA	NA	15.9493	NA	14.6928	15.5075	15.9874	NA
10_GL0000502;MC-0-1_GL0058727;MH-0-4_GL0002636;S-Fe10_GL0041507	NA	NA	NA	NA	NA	12.891	NA	12.3523	NA	NA	NA	11.185	13.738	NA	NA	NA	NA	NA	NA	NA	13.8781	NA	13.0058	NA
10_GL0000502;MC-0-1_GL0058727;MH-0-4_GL0002636;S-Fe10_GL0041507;S-Fe1_GL0178399	14.5511	16.2832	15.7516	15.2847	14.6455	14.7391	12.5195	13.7379	13.7059	11.2679	14.6685	12.3229	15.3881	14.3944	15.728	13.632	14.6929	12.7218	15.6763	14.1939	15.2186	15.0169	13.8491	12.0505
10_GL0000502;MC-0-1_GL0058727;S-Fe10_GL0076296;S-Fe1_GL0178399	NA	NA	NA	NA	NA	10.9221	NA	NA	NA	NA	NA	NA	NA	NA	NA	NA	NA	NA	NA	NA	NA	NA	NA	NA
10_GL0000502;MH-0-4_GL0002636;S-Fe1_GL0178399	NA	11.8121	NA	13.4245	NA	12.5561	NA	12.8417	NA	NA	11.2736	10.9502	11.9177	NA	12.1919	NA	NA	NA	13.3642	NA	12.4299	11.4658	NA	NA
10_GL0000502;S-Fe10_GL0076296;S-Fe1_GL0178399	NA	12.1616	13.3064	13.4303	12.3359	12.9998	NA	12.603	12.0454	12.5703	NA	11.7559	12.631	12.7364	12.2832	NA	12.7401	NA	12.4744	NA	12.4914	11.3172	11.9894	NA
10_GL0000536	NA	NA	NA	NA	NA	NA	NA	9.76513	NA	NA	NA	NA	11.7248	11.8808	12.4916	NA	10.7003	NA	11.5906	NA	11.8474	12.1394	NA	NA
10_GL0000536;11_GL0117532	NA	NA	NA	NA	NA	NA	NA	NA	NA	NA	NA	10.4823	10.3245	NA	11.1768	NA	NA	NA	NA	NA	12.1165	NA	NA	NA
10_GL0000536;6-7_GL0033069	12.792	10.29	10.8095	11.5446	13.2013	13.0217	13.2985	13.3821	12.1812	10.5981	12.8747	12.5255	12.9536	13.2649	12.9944	13.3631	12.9391	12.6315	12.4176	13.6084	12.8329	NA	12.0865	11.7945
10_GL0000536;6-7_GL0033069;S-Fe18_GL0057238	14.2182	12.9964	13.0604	NA	15.3794	13.4466	14.5194	14.1568	13.2037	12.2712	15.0001	13.768	14.0843	15.4659	15.1529	14.4219	14.4455	14.2736	14.9626	14.3697	13.6391	NA	14.148	13.3073
10_GL0002188	16.0148	15.7205	15.1659	13.976	NA	12.6737	11.7213	14.9204	13.6218	13.9261	14.096	15.6728	12.5243	NA	NA	13.5773	14.0039	12.933	12.7179	14.5865	12.6291	12.7979	13.007	13.405
10_GL0002401	14.9597	14.6277	14.6318	NA	NA	13.2331	NA	14.5313	14.0382	14.572	14.4683	14.7611	12.7028	NA	NA	NA	NA	NA	NA	14.1897	12.2502	NA	NA	NA
10_GL0003402	10.6216	12.6673	12.1308	12.8737	12.0313	12.3302	11.3037	12.2497	11.4847	9.73791	12.8078	11.0235	12.9099	12.4488	11.7966	10.8963	11.5059	12.0203	13.072	11.84	NA	11.5574	10.2363	NA
10_GL0009545	18.5487	18.0053	17.4601	19.1714	16.1305	18.2291	16.5021	17.9153	18.817	17.4534	18.1321	17.3563	18.121	16.2208	17.1051	16.6639	17.5013	18.3426	18.4594	17.8076	19.1225	18.3375	17.3268	16.7142
10_GL0009545;20_GL0027333;4-2_GL0105421;47_GL0039979;5-7_GL0020114;5-7_GL0076266;5-7_GL0138075;6-8_GL0073135;6-8_GL0085366;7-4_GL0099193;G1-5A_GL0036391;MC-0-1_GL0011862;MH-6-5_GL0063812;S-Fe10_GL0161803;S-Fe1_GL0098999	18.2268	19.7164	18.5764	20.3852	19.9458	20.4876	19.6407	20.6547	19.5757	18.105	20.0173	18.4889	20.4185	20.0684	20.3837	19.788	18.5627	19.6253	20.2405	19.7518	20.7847	20.8372	18.0004	19.8282
10_GL0009545;20_GL0089028;5-7_GL0020114;5-7_GL0076266;5-7_GL0138075;54_GL0144097;6-8_GL0073135;6-8_GL0085366;8-2_GL0140216;MH-0-5_GL0037489;MH-6-4_GL0107289;S-Fe2_GL0149110;S-Fe3_GL0215405	16.5512	17.7646	16.7807	18.4781	17.5086	18.021	17.7617	17.7992	17.7754	16.5997	17.5227	16.9249	17.7013	17.5791	17.9256	17.7044	17.8811	17.9554	17.4456	17.653	18.311	18.5376	18.1255	18.2559
10_GL0009545;2A-dyr16-07_GL0047024;G1-5A_GL0036391	13.142	13.52	13.6486	16.3961	14.8654	15.2963	14.5501	15.9703	13.8646	14.0262	13.6909	13.1482	14.395	14.7235	14.1731	14.4491	13.6999	14.8184	14.524	13.9335	14.2349	16.529	13.6395	14.7631
10_GL0009545;5-7_GL0020114;5-7_GL0076266;5-7_GL0138075;6-8_GL0073135;6-8_GL0085366;7-4_GL0099193;G1-5A_GL0036391;MC-0-1_GL0011862;MH-6-5_GL0063812	NA	NA	NA	NA	NA	NA	NA	11.6569	NA	NA	NA	NA	NA	NA	NA	NA	NA	NA	NA	NA	NA	NA	NA	NA
10_GL0009545;5-7_GL0020114;5-7_GL0076266;6-8_GL0073135;6-8_GL0085366;G1-5A_GL0036391	16.5992	17.1178	16.3708	18.5843	18.3487	18.9717	17.4183	19.0048	17.5721	16.5687	18.0984	16.79	18.9262	18.3106	18.6402	18.169	16.2589	17.7154	18.5185	18.1953	19.1969	19.7552	17.6173	18.0061
10_GL0011642	NA	12.9906	12.9212	13.3152	15.1932	14.2506	14.2907	13.5649	13.6739	12.2214	14.3671	12.7268	16.0901	15.2219	15.3302	14.0724	14.0624	NA	15.2141	14.4304	14.8	15.1854	14.1546	14.0418
10_GL0011642;2-1_GL0025638	12.9667	11.1942	11.444	11.7424	12.9192	12.2252	14.2056	NA	11.7254	NA	12.7405	NA	12.7023	13.3334	14.3972	13.2379	NA	NA	NA	NA	12.5429	12.6067	NA	NA
10_GL0011642;2-1_GL0025638;2-1_GL0032121;2-1_GL0118084	NA	10.2084	9.97767	NA	12.3956	NA	11.8874	11.542	10.9248	NA	11.3514	NA	13.0024	12.5396	13.2703	11.8835	11.4945	NA	12.7073	12.4081	12.6641	12.6015	11.1593	11.2228
10_GL0011642;2-1_GL0025638;2-1_GL0032121;2-1_GL0118084;2-3_GL0037968;2-5_GL0004989;5-8_GL0142127	15.1955	12.5171	13.281	12.924	14.9078	13.833	15.2287	14.6452	14.0961	13.3772	14.4469	15.6938	14.6242	15.1224	14.7992	14.5748	14.2324	14.5753	14.6197	15.5568	14.6163	13.525	14.2532	14.3646
10_GL0011642;2-1_GL0025638;2-1_GL0032121;2-1_GL0118084;31_GL0014841	NA	NA	NA	NA	NA	NA	NA	11.7254	NA	NA	NA	NA	13.9473	NA	NA	NA	NA	NA	NA	NA	11.4698	NA	NA	NA
10_GL0011642;2-1_GL0025638;2-1_GL0118084	12.1495	NA	NA	NA	12.3947	NA	13.0398	NA	NA	NA	11.3426	NA	NA	12.2561	12.5938	12.2618	NA	11.1828	12.8575	11.9474	NA	12.1424	NA	11.8638
10_GL0011642;2-1_GL0032121;2-1_GL0118084;2-5_GL0004989;5-8_GL0142127	NA	NA	NA	NA	13.4855	13.3355	13.1094	12.8169	12.4476	NA	NA	12.2597	14.0234	13.4138	13.1714	12.3654	10.476	NA	NA	13.2069	13.0075	NA	12.716	11.2196
10_GL0012139;10_GL0042587;1A-dyr2-07_GL0003569	NA	NA	NA	NA	NA	NA	NA	12.7554	NA	NA	NA	NA	NA	NA	NA	NA	NA	NA	NA	NA	NA	NA	NA	NA
10_GL0012139;10_GL0042587;1A-dyr2-07_GL0003569;4-1_GL0078073;G1-1A_GL0039147;MC-0-1_GL0035932;MC-6-2_GL0024444;S-Fe10_GL0040868	16.228	17.6851	18.1043	17.7662	16.6598	16.4127	15.2058	16.0324	16.2698	15.6214	16.8857	14.6442	15.8095	16.8195	16.7212	16.0948	16.9962	15.2334	16.6654	15.6083	15.8527	16.1969	16.4531	14.6896
10_GL0012139;10_GL0042587;1A-dyr2-07_GL0003569;G1-1A_GL0039147;MC-0-1_GL0035932;MC-6-2_GL0024444;S-Fe10_GL0040868	13.6118	15.239	15.7923	14.5607	13.7683	14.3689	12.2412	13.811	13.35	12.0791	14.572	12.7806	13.9555	13.6967	14.8368	13.237	15.1673	12.9104	14.3784	13.8065	13.9336	14.461	14.1441	12.1453
10_GL0012139;4-1_GL0078073;G1-1A_GL0039147;MC-0-1_GL0035932;MC-6-2_GL0024444;S-Fe10_GL0040868	14.9659	15.3887	15.7458	14.9811	14.5172	15.0721	13.2313	15.035	14.9521	12.5953	15.68	13.0743	15.6811	14.7068	15.7762	13.9541	15.6115	14.168	15.3756	15.7725	15.3093	14.9783	15.4305	NA
10_GL0014042	NA	NA	NA	NA	NA	NA	NA	12.3578	NA	NA	NA	NA	11.1911	NA	NA	NA	NA	NA	NA	NA	11.6215	NA	NA	NA
10_GL0014042;10_GL0033884;2-1_GL0066248;7-5_GL0154146;G1-1A_GL0058575;Group2-8A_GL0004166;Group2-8A_GL0074958	14.6118	11.1809	NA	12.6683	14.309	NA	NA	NA	13.0991	13.2331	NA	NA	14.4986	14.2405	14.3371	13.9778	13.2609	NA	NA	12.7348	NA	NA	13.3938	12.8494
10_GL0014042;5_GL0087218;7-5_GL0154146;Group2-3A_GL0011001;Group2-8A_GL0074958	14.8636	15.2639	13.4424	15.2614	16.9582	16.5777	16.4042	14.5036	16.7792	14.4954	16.0883	16.5129	17.4255	17.1216	16.6566	16.8085	15.8765	16.1483	16.8196	16.4628	16.0261	16.2076	15.4545	14.6673
10_GL0014042;Group2-6A_GL0042536;Group2-8A_GL0004166	12.4117	NA	NA	NA	13.1563	NA	14.0281	NA	12.4241	9.87894	12.5701	NA	13.1209	13.0231	13.3628	13.0862	NA	NA	12.5822	12.8306	NA	NA	13.1211	12.513
10_GL0015619	12.2264	12.3401	12.7348	12.4795	13.403	13.214	NA	NA	12.4666	NA	NA	NA	NA	13.6441	12.708	NA	11.4596	NA	NA	NA	12.0882	NA	NA	NA
10_GL0015619;2-2_GL0087128;5-8_GL0134414;S-Fe6_GL0170816	15.4726	16.4883	15.5255	16.5504	17.0625	14.8009	14.9335	NA	NA	14.5253	NA	NA	NA	17.1251	15.1972	17.3404	17.5977	NA	18.2124	16.972	NA	NA	NA	16.0913
10_GL0015619;2-8_GL0037621;5-8_GL0134414	16.9703	13.727	15.7456	14.437	18.0036	15.6248	15.5832	15.7685	16.9676	15.1049	17.5184	16.9543	18.4773	18.0597	19.0986	16.7325	17.1267	17.0625	16.3996	17.7003	17.9354	13.6974	16.2843	14.4184
10_GL0015619;5-8_GL0134414	16.7164	14.3308	16.596	15.0343	17.5827	15.5981	16.2326	NA	17.3047	15.6623	16.4329	15.9737	16.0127	17.5259	16.8491	17.1325	17.2461	17.1303	16.5034	17.248	16.8658	13.2587	17.2243	16.6818
10_GL0015619;Group2-1A_GL0079313;Group2-4A_GL0181870	NA	NA	NA	NA	12.0212	NA	NA	NA	11.4584	11.7305	12.9175	NA	13.15	11.4406	13.8912	NA	NA	NA	NA	12.1883	NA	NA	NA	NA
10_GL0018496	NA	NA	NA	NA	9.29581	NA	NA	NA	NA	NA	NA	10.8603	NA	9.5688	NA	NA	9.73303	NA	NA	NA	10.2516	NA	NA	NA
10_GL0022779	11.4018	11.9382	11.897	12.6836	11.5107	NA	NA	NA	NA	NA	12.2863	NA	13.2694	11.3423	13.2954	NA	NA	NA	10.8451	11.486	10.5213	10.9753	NA	NA
10_GL0022788	16.7033	17.388	18.7847	18.9108	17.777	18.0441	17.241	17.6041	17.9036	16.4539	17.5859	15.7692	17.0299	17.8745	16.7903	18.0114	14.8682	14.6728	18.3023	16.2572	18.0401	18.5118	16.8939	14.289
10_GL0023724	NA	NA	NA	NA	NA	NA	NA	NA	10.663	NA	NA	NA	10.1208	NA	10.4691	NA	10.4305	9.87384	10.187	NA	10.6041	NA	NA	NA
10_GL0024591;16_GL0015629;1B-dyr12-07_GL0014279;20_GL0118339;S-Fe10_GL0031283	14.4906	14.8783	13.9596	14.4763	NA	13.5193	11.8055	NA	NA	11.9763	14.6441	13.3968	NA	NA	13.926	12.5996	12.8235	12.5988	14.7359	13.8916	13.8908	13.8896	13.4667	NA
10_GL0025698	13.891	NA	NA	NA	NA	NA	NA	NA	NA	NA	NA	NA	NA	NA	NA	NA	NA	NA	NA	NA	NA	NA	NA	NA
10_GL0025698;2-4_GL0007561;4-2_GL0043523;54_GL0082039;G1-5A_GL0104085	13.6155	NA	14.0413	NA	NA	16.355	16.0736	NA	15.9601	14.1856	15.52	14.3753	15.4615	16.4275	NA	15.0305	17.0959	15.0389	15.5521	14.2277	17.3481	14.3677	14.764	14.7055
10_GL0025698;4-2_GL0043523;5-8_GL0102626;G1-5A_GL0104085	11.4924	NA	NA	NA	14.5954	11.3269	NA	NA	14.6151	13.2695	15.0134	14.014	16.3461	14.7179	15.3393	13.2044	14.88	14.1525	15.603	14.6685	16.4802	11.5304	14.4441	13.3408
10_GL0025698;54_GL0082039;6-1_GL0025244	NA	NA	NA	NA	NA	10.4437	9.96658	NA	NA	NA	NA	NA	11.5315	9.81824	11.1545	NA	NA	10.2233	12.3285	10.569	NA	NA	NA	NA
10_GL0025698;5-8_GL0102626;54_GL0082039;6-1_GL0025244;G1-1A_GL0023674;MC-6-2_GL0078340;MC-6-2_GL0178191	NA	NA	NA	NA	13.2424	13.7106	12.658	13.3095	13.335	NA	NA	12.7659	14.077	13.2267	13.4523	NA	14.0991	13.6124	NA	13.0989	14.1444	NA	13.1664	NA
10_GL0025715	11.5648	NA	NA	NA	12.1403	11.9879	12.7598	NA	NA	NA	NA	NA	11.1395	NA	NA	NA	11.4398	12.2106	12.6474	11.9982	NA	12.175	NA	10.9227
10_GL0025715;2-1_GL0103287;2-2_GL0080396;4-1_GL0068219;4-8_GL0081263;7-1_GL0085595;8-2_GL0016640;8-7_GL0053386;MC-0-1_GL0045090;S-Fe12_GL0199546	15.5912	14.1375	15.1612	15.0433	17.4804	16.7672	17.1982	16.7503	16.7689	14.2362	16.5754	16.751	17.4102	17.6671	17.4943	16.6936	16.7302	16.1643	17.4836	16.6174	17.827	17.1702	16.5988	15.9892
10_GL0025715;8-7_GL0053386	NA	NA	NA	NA	12.641	NA	NA	NA	12.4234	NA	NA	NA	13.4225	12.9168	11.834	NA	13.1339	12.8437	NA	NA	13.8291	NA	NA	NA
10_GL0026251	14.6323	14.7699	13.5095	13.6523	NA	NA	NA	14.1589	12.8482	12.8607	13.4431	13.8761	12.2157	NA	NA	NA	13.2784	NA	12.9595	14.1445	NA	NA	11.8337	12.5937
10_GL0030674	12.6303	NA	NA	NA	17.061	NA	NA	NA	NA	NA	15.326	13.0768	16.6621	17.0117	15.7763	16.5707	18.0842	17.3937	11.6622	13.2296	17.2179	NA	NA	17.7544
10_GL0030675	NA	NA	NA	NA	15.3332	NA	NA	NA	NA	NA	14.2587	12.5869	15.5191	15.311	15.2152	14.434	15.3585	15.4884	NA	12.937	15.7477	NA	NA	14.6199
10_GL0030677	10.372	NA	NA	11.9437	15.3605	NA	NA	NA	NA	NA	10.9705	12.0647	15.8781	15.3816	14.4916	14.9402	15.9609	15.0828	NA	NA	16.4869	11.7238	12.6494	15.4547
10_GL0030713	13.903	14.6588	14.4293	14.0833	12.4529	15.4574	11.8675	13.5894	13.4852	12.7074	14.0639	14.2013	15.1889	12.5581	14.8189	13.8304	12.4161	13.0916	13.2929	15.8288	13.9594	15.7078	12.7742	NA
10_GL0033884	NA	NA	NA	NA	10.9173	NA	NA	10.1461	NA	NA	NA	NA	11.9883	11.4065	11.0606	NA	10.4243	NA	10.4356	NA	10.9976	NA	10.5244	NA
10_GL0033884;5_GL0087218;Group2-8A_GL0004166	13.1045	13.1563	NA	NA	14.945	14.3082	13.519	NA	14.1093	NA	14.0733	13.1043	14.6299	15.0495	NA	NA	NA	NA	NA	14.5068	13.6992	13.1491	NA	12.2873
10_GL0033898;2-1_GL0031576;6-2_GL0084710;Group2-2A_GL0046340;S-Fe10_GL0121171;S-Fe12_GL0048418	12.6734	NA	NA	NA	NA	12.3073	13.2838	NA	NA	NA	12.7058	NA	NA	NA	NA	NA	NA	NA	13.0109	13.1567	NA	13.3834	NA	NA
10_GL0033898;2-6_GL0065188;6-6_GL0061155	NA	NA	NA	NA	NA	NA	NA	NA	NA	NA	NA	NA	NA	NA	NA	NA	NA	NA	NA	NA	9.57329	NA	NA	NA
10_GL0034936;2-1_GL0052323;2-1_GL0068941;2-5_GL0028277;49_GL0036566;5-4_GL0027857;5-8_GL0100648;7-2_GL0086662;7-8_GL0045711;Group2-8A_GL0008797	16.9124	13.0625	14.8067	13.6295	16.9627	16.1232	17.1433	13.8512	16.1226	14.4752	15.7765	16.4749	16.0873	17.026	16.8573	15.9507	15.2582	14.8595	16.2367	16.8711	16.0699	14.4159	14.1575	15.6105
10_GL0034936;2-1_GL0052323;2-1_GL0068941;2-5_GL0028277;49_GL0036566;5-4_GL0027857;5-8_GL0100648;7-2_GL0086662;Group2-2A_GL0133147;Group2-8A_GL0008797	NA	NA	NA	NA	NA	NA	NA	12.2133	NA	NA	NA	13.7379	NA	NA	NA	NA	NA	NA	NA	NA	NA	NA	NA	NA
10_GL0038119;1A-dyr4-07_GL0106172;2-1_GL0009701;2-1_GL0066566;3-7_GL0072829;4-1_GL0012894;5-7_GL0102373;7-1_GL0070929;G1-5A_GL0190133	18.1585	NA	NA	NA	NA	NA	NA	NA	NA	NA	NA	NA	NA	NA	NA	NA	NA	NA	NA	NA	NA	NA	NA	NA
10_GL0038119;2-1_GL0009701;3-7_GL0072829;G1-2A_GL0012091	13.4708	12.7271	10.7431	11.6127	15.1327	12.9492	14.2337	13.8629	13.374	10.8844	14.6763	14.3627	14.2172	15.3072	15.0677	12.2831	12.7062	NA	14.7775	NA	14.6211	NA	13.3731	NA
10_GL0038119;3-7_GL0072829	13.6391	14.0601	12.6126	14.1759	14.9705	13.4318	13.7644	14.9913	14.6052	13.2011	14.7162	15.868	14.5265	14.9715	15.4761	15.1992	13.9757	15.179	14.8213	15.4553	14.13	15.1574	15.8228	14.8329
10_GL0038119;3-7_GL0072829;7-1_GL0070929	13.771	13.3217	13.5042	14.6819	17.1719	16.4747	15.7039	15.0911	15.9221	14.1221	14.8209	15.7288	16.571	17.2288	15.7705	14.9554	15.8208	14.7572	16.94	15.9234	15.8422	NA	14.1931	NA
10_GL0038427;11_GL0062137;3-8_GL0006308;7-4_GL0033315	NA	NA	NA	NA	NA	NA	NA	13.1774	NA	NA	NA	NA	13.6795	NA	NA	NA	NA	NA	12.2818	NA	NA	NA	NA	NA
10_GL0039963	NA	NA	NA	NA	NA	11.4203	NA	11.1677	NA	NA	NA	NA	11.7098	NA	NA	NA	NA	NA	NA	NA	NA	11.1444	NA	NA
10_GL0039963;2B-dyr19-06_GL0048336	NA	14.825	NA	14.2873	NA	NA	NA	NA	NA	NA	NA	NA	NA	NA	13.7765	13.528	NA	NA	NA	14.8801	NA	15.4095	NA	NA
10_GL0039963;2B-dyr19-06_GL0048336;52_GL0143271;MC-0-1_GL0037338;MC-0-3_GL0013222;MH-6-5_GL0134884;S-Fe1_GL0047687	NA	NA	NA	NA	NA	14.8532	11.3452	12.8572	NA	11.4574	NA	12.1391	13.6511	NA	13.6171	NA	11.9786	13.0084	12.9678	NA	12.5466	15.0546	NA	NA
10_GL0039963;2B-dyr19-06_GL0048336;Group2-5A_GL0014900	14.996	16.114	14.7083	16.0147	14.5936	15.8123	12.434	13.9259	13.8608	NA	15.4299	12.1399	15.8668	14.683	15.1404	13.9684	13.4999	13.2431	14.1474	14.3398	14.588	15.7833	12.288	NA
10_GL0039963;Group2-5A_GL0014900	NA	NA	NA	NA	NA	NA	NA	10.9097	NA	NA	NA	NA	NA	NA	NA	NA	NA	NA	NA	NA	NA	NA	NA	NA
10_GL0039976	12.6388	14.0634	13.5658	14.2812	NA	13.898	NA	NA	NA	NA	13.537	NA	13.4539	NA	13.7775	12.0957	NA	10.2217	12.5275	14.6131	11.6819	15.7349	NA	NA
10_GL0039979;2B-dyr19-06_GL0055855	14.0321	14.439	14.1449	14.6385	NA	15.4895	11.9728	13.8778	NA	13.3715	13.7994	12.8543	13.868	12.3274	13.7837	13.7054	13.1635	13.7471	12.7742	15.0182	14.9215	15.6195	NA	NA
10_GL0039980;1A-dyr2-07_GL0002766	NA	13.2194	12.4581	13.1541	NA	13.3735	NA	NA	NA	NA	11.7756	NA	12.5131	NA	12.2428	NA	NA	NA	12.3053	12.8532	NA	14.9126	NA	NA
10_GL0039980;1A-dyr2-07_GL0002766;Group2-1A_GL0005900	NA	NA	NA	NA	NA	NA	NA	13.8422	NA	NA	NA	14.1125	14.9661	13.8103	NA	NA	NA	NA	NA	NA	14.3295	15.6513	15.1655	NA
10_GL0039980;Group2-1A_GL0005900	11.6964	12.707	13.3438	12.3759	NA	13.9087	NA	NA	NA	NA	11.7374	NA	14.0189	NA	13.855	NA	NA	11.3951	11.6895	11.552	NA	15.4614	12.2895	NA
10_GL0040330	NA	NA	NA	NA	11.7073	11.8916	NA	NA	10.5334	NA	NA	NA	12.8179	12.1529	13.481	11.8916	NA	NA	NA	NA	11.4649	NA	NA	NA
10_GL0040330;2-4_GL0087179;3-5_GL0047540;3-5_GL0078498;4-1_GL0069176;41_GL0096270;5-1_GL0073759;6-6_GL0093594;7-1_GL0064936;7-2_GL0034129;G1-2A_GL0039497;Group2-5A_GL0000892;Group2-6A_GL0107987;Group2-8A_GL0004165;S-Fe12_GL0208884	13.5215	NA	NA	NA	14.0752	NA	NA	NA	12.9973	NA	NA	13.0997	13.8405	13.7615	13.697	12.7788	NA	NA	13.2375	NA	13.6521	NA	NA	NA
10_GL0040330;2-4_GL0087179;3-5_GL0047540;3-5_GL0078498;4-1_GL0069176;41_GL0096270;5-1_GL0073759;6-6_GL0093594;7-1_GL0064936;7-2_GL0034129;Group2-5A_GL0000892;Group2-6A_GL0107987;Group2-8A_GL0004165	NA	NA	NA	NA	NA	18.247	NA	18.218	17.8445	NA	NA	17.376	18.7832	NA	NA	NA	NA	NA	NA	NA	18.1129	18.3078	16.9833	NA
10_GL0040330;2-4_GL0087179;3-5_GL0047540;4-1_GL0069176;41_GL0096270;5-1_GL0073759;6-6_GL0093594;7-1_GL0064936;7-2_GL0034129;Group2-5A_GL0000892;Group2-6A_GL0107987;Group2-8A_GL0004165	17.0853	NA	NA	NA	17.2697	16.8128	16.9302	16.0193	NA	NA	16.4569	16.7461	NA	17.4933	17.1834	16.5485	15.2138	16.2637	17.621	17.8915	19.0922	16.2542	15.525	15.2645
10_GL0040330;3-5_GL0078498;Group2-3A_GL0085690	NA	13.954	13.7854	NA	15.3529	15.2145	NA	14.7571	15.8122	NA	14.7131	14.8359	16.3119	15.4297	14.9467	NA	15.4939	15.6575	14.9253	15.6545	15.5921	NA	14.1315	15.1419
10_GL0040778	NA	NA	NA	NA	NA	NA	NA	13.0827	NA	NA	NA	NA	12.1252	NA	NA	NA	11.8612	NA	NA	NA	NA	NA	NA	NA
10_GL0040778;14_GL0046265;1A-dyr4-07_GL0104106;20_GL0086333;Group2-8A_GL0128941;S-Fe2_GL0137955;S-Fe2_GL0200208	12.0695	11.7606	12.3364	13.1498	14.8654	14.9942	14.4331	14.3166	12.2117	11.7504	12.6606	12.1241	14.5037	14.8162	13.8819	13.2424	14.3961	13.4258	13.4475	NA	14.8753	15.4487	12.2958	13.0054
10_GL0040778;14_GL0046265;1A-dyr4-07_GL0104106;S-Fe2_GL0200208	NA	NA	NA	NA	NA	NA	NA	NA	14.5308	NA	NA	NA	14.2959	NA	NA	NA	NA	NA	NA	NA	NA	NA	NA	NA
10_GL0040778;S-Fe2_GL0200208	13.8792	14.6299	13.6926	15.3663	16.0714	15.5484	14.7701	15.4636	13.9862	13.2909	14.8034	14.1649	16.1503	16.0458	14.8281	15.5794	13.1748	12.7298	14.4332	14.2663	16.0637	15.6575	13.4414	13.2801
10_GL0042587	12.5771	NA	NA	NA	NA	NA	NA	NA	NA	14.204	NA	NA	NA	NA	13.9624	NA	NA	NA	NA	NA	NA	NA	NA	NA
10_GL0045886	11.6933	11.5786	11.3367	12.2846	13.7678	13.7468	NA	13.0341	NA	NA	12.951	13.8179	13.8977	13.9343	13.498	NA	NA	13.7524	NA	NA	NA	12.682	NA	11.7901
10_GL0048655	13.7764	NA	13.6969	14.1005	15.2775	NA	15.1704	NA	NA	13.3052	14.4773	NA	NA	15.1993	16.0949	14.1073	14.3469	13.3228	15.7528	14.8134	NA	15.6684	NA	12.6671
10_GL0048655;20_GL0131076	14.6568	11.2362	NA	NA	14.9862	13.2699	16.0315	12.6472	12.6177	12.6111	14.6738	14.584	14.0134	14.9593	14.3815	13.3218	13.6968	13.3989	14.6723	15.084	14.2771	11.4207	12.5714	13.0481
10_GL0048655;2-1_GL0042309;2-2_GL0131240;2-3_GL0051869;43_GL0068607;6-2_GL0075313;7-8_GL0086080;MC-6-2_GL0075820	16.3721	15.4021	15.2907	14.538	17.1306	17.2811	16.7795	16.4872	16.6784	15.3182	16.4082	14.7868	18.5951	16.779	16.3558	15.4005	17.4049	17.172	18.4064	16.9805	17.3897	17.3753	16.5203	15.7326
10_GL0048655;2-1_GL0042309;2-2_GL0131240;2-3_GL0051869;43_GL0068607;7-8_GL0086080	NA	NA	NA	NA	13.4685	NA	12.1765	NA	NA	NA	NA	NA	12.4998	13.5308	NA	12.3232	14.1266	12.8196	14.7369	12.7234	NA	11.7782	NA	NA
10_GL0051222	11.6818	10.9304	10.8188	10.5731	12.851	12.3731	12.7903	NA	12.3911	10.8339	11.4182	9.94601	13.0099	12.8382	10.9202	10.5423	11.8815	NA	12.5925	NA	13.3889	12.6261	11.7676	NA
10_GL0051222;2-1_GL0012776;2-1_GL0046786;2-3_GL0075850;2-3_GL0100459;20_GL0090764;26_GL0073947;3-1_GL0035705;4-1_GL0045655;4-2_GL0122448;7-5_GL0020145;S-Fe5_GL0083923	15.3089	14.0381	14.292	14.4383	16.4396	16.2687	16.3556	15.5051	15.9142	14.67	15.4427	15.8886	16.7343	16.4115	16.3854	14.8089	15.4721	16.1376	16.5464	16.1972	16.2253	15.76	15.5598	14.7249
10_GL0051222;2-1_GL0012776;2-1_GL0046786;2-3_GL0075850;3-1_GL0035705	NA	NA	NA	NA	NA	NA	NA	12.6322	NA	NA	NA	13.1431	13.971	NA	NA	NA	NA	NA	NA	NA	13.6988	NA	11.6246	NA
10_GL0051222;2-1_GL0046786;2-3_GL0100459	NA	NA	NA	NA	NA	NA	NA	13.22	NA	NA	NA	12.1156	NA	NA	NA	NA	NA	NA	NA	NA	15.5064	NA	NA	NA
10_GL0051222;2-3_GL0100459;20_GL0090764;26_GL0073947;4-1_GL0045655;4-2_GL0122448;7-5_GL0020145;S-Fe5_GL0083923	13.159	NA	13.1	NA	13.995	14.5954	13.1953	14.397	NA	13.5562	13.4562	13.3128	13.7694	13.8026	NA	13.4777	13.6845	NA	13.815	NA	NA	14.4753	NA	13.6917
10_GL0051222;26_GL0073947	NA	13.4653	12.7773	13.9991	13.6822	14.9063	NA	14.8412	NA	12.7581	NA	NA	13.9394	13.6172	14.1264	14.8405	13.6109	14.0704	13.6903	13.3796	NA	15.0666	13.8777	NA
10_GL0051405;2-1_GL0072698;2-1_GL0105994;2-2_GL0129609;23_GL0029752;4-3_GL0000037;4-8_GL0033432;6-1_GL0062491;G1-8A_GL0133168;Group2-2A_GL0072575;MC-6-2_GL0032211;S-Fe9_GL0104873	NA	NA	NA	NA	NA	13.2918	13.2972	13.1908	12.9402	NA	NA	NA	13.5372	13.659	13.3089	NA	NA	13.0243	13.8672	NA	13.5775	14.1197	13.8616	NA
10_GL0051405;2-4_GL0036412;S-Fe10_GL0121171;S-Fe12_GL0048418	14.3513	13.4276	14.1761	13.3418	15.4706	14.7032	15.5062	14.5615	15.1372	13.9495	14.6257	14.7344	15.7968	15.5782	15.5108	14.7452	14.9807	14.8301	15.4034	14.8173	15.1006	14.7711	14.5762	14.1698
10_GL0051410;11_GL0106926	NA	NA	11.6482	NA	10.3439	10.6798	12.2517	10.9488	NA	NA	NA	NA	NA	10.9559	NA	11.4483	NA	NA	NA	NA	10.4277	11.4676	13.1146	9.94155
10_GL0051410;11_GL0106926;4-7_GL0061304;5-7_GL0064061;MC-6-2_GL0134348;S-Fe20_GL0190872	NA	NA	NA	NA	NA	12.2595	NA	12.3774	NA	NA	NA	NA	12.259	NA	NA	NA	NA	NA	NA	NA	NA	NA	NA	NA
10_GL0051410;4-7_GL0061304;5-7_GL0064061	12.0476	NA	NA	NA	14.0066	13.7025	13.6187	14.2184	13.7868	NA	NA	NA	NA	14.0188	NA	NA	15.073	13.7847	13.1053	NA	13.3234	13.3019	14.0181	13.3447
10_GL0054899	13.4723	NA	NA	NA	NA	12.6421	NA	14.5726	13.3473	NA	NA	14.2338	13.2489	NA	NA	NA	15.155	NA	12.5268	NA	11.7429	13.7128	12.4117	NA
10_GL0055487;23_GL0131578;MC-6-3_GL0035939	11.5638	12.0442	12.0268	NA	NA	11.5302	10.0681	11.8281	11.5098	NA	12.6284	11.2876	12.378	11.9884	NA	NA	11.292	NA	12.1746	11.1066	10.6263	11.3369	11.6229	NA
10_GL0057338	NA	12.6241	12.5238	18.297	NA	NA	NA	NA	NA	NA	NA	NA	NA	NA	13.094	13.3614	NA	NA	NA	NA	NA	NA	NA	NA
10_GL0057711	10.7652	11.15	13.149	NA	12.9414	13.1622	NA	13.8659	13.2089	NA	10.4442	11.069	14.0946	13.1519	14.2231	11.5312	13.9763	12.3268	12.6655	NA	13.2466	NA	11.0341	11.555
10_GL0059712;4-2_GL0041327;5-1_GL0073769;7-1_GL0009368;8-8_GL0039466;G1-2A_GL0010340;S-Fe8_GL0195568	NA	NA	NA	NA	13.0598	NA	NA	NA	NA	NA	NA	11.8779	13.6936	13.1263	NA	NA	NA	NA	12.723	NA	NA	NA	NA	NA
10_GL0059712;4-2_GL0041327;5-1_GL0073769;G1-2A_GL0010340;S-Fe8_GL0195568	NA	NA	NA	12.7503	NA	NA	NA	NA	NA	NA	NA	11.311	NA	NA	NA	NA	NA	NA	NA	NA	NA	NA	NA	NA
10_GL0059726;3-6_GL0039139;5-8_GL0059125;7-5_GL0001364;S-Fe13_GL0031540	14.9435	14.6819	15.0349	14.742	16.064	15.975	15.6192	15.7282	15.2742	14.2839	15.6746	15.1932	16.1818	16.333	16.3247	15.8762	15.7749	15.6609	16.2901	16.1259	16.116	15.9593	15.0058	14.6805
10_GL0059726;3-6_GL0039139;5-8_GL0059125;S-Fe13_GL0031540	15.6461	NA	NA	NA	NA	15.5525	16.1567	NA	15.6837	13.4968	15.7212	NA	NA	15.6124	16.6081	NA	NA	14.6683	16.3391	16.0206	NA	15.2282	NA	15.3814
10_GL0059726;3-6_GL0039139;8-2_GL0079284	11.5001	12.4811	12.0797	12.642	14.7581	12.0555	13.2125	13.7272	11.2563	NA	12.5705	NA	13.5227	14.6165	14.4657	12.5572	NA	NA	13.0965	12.9294	12.6689	13.1204	11.4031	11.6791
10_GL0059726;3-6_GL0039139;8-2_GL0079284;S-Fe13_GL0031540	16.0434	16.01	16.7868	16.0552	16.9981	16.6274	17.3458	NA	16.0449	15.5206	16.7951	NA	16.1173	17.1278	16.9626	17.3314	16.9537	16.4225	16.6441	16.6045	NA	NA	NA	16.9756
10_GL0059726;3-6_GL0039139;S-Fe13_GL0031540	13.8602	12.5076	13.2756	13.1603	15.1928	14.3524	14.685	14.1465	13.3659	11.33	14.1241	14.0096	15.1501	15.3934	14.9221	14.2348	14.1964	13.1972	15.0517	15.0734	14.3107	14.1394	13.6614	13.4455
10_GL0059878;14_GL0065856;23_GL0134681;38_GL0053435;4-1_GL0018258;40_GL0061738;7-1_GL0084623;G1-1A_GL0071501;MC-0-1_GL0009093;MC-6-4_GL0043020;MC-6-4_GL0072895;MH-6-5_GL0072195;S-Fe10_GL0019286;S-Fe10_GL0157485;S-Fe3_GL0042534	13.0408	NA	NA	13.6845	NA	12.2934	10.8795	NA	NA	NA	12.5887	NA	13.4186	NA	13.9577	NA	NA	10.4424	14.1502	12.0051	13.4318	13.7306	NA	NA
10_GL0059878;38_GL0053435;7-1_GL0084623;S-Fe10_GL0157485;S-Fe3_GL0042534	NA	NA	NA	NA	12.4663	12.0434	NA	13.1044	NA	NA	NA	11.3462	14.2359	NA	14.0568	NA	NA	10.532	13.8273	NA	13.3699	14.0716	NA	NA
10_GL0059878;7-1_GL0084623;MC-0-1_GL0009093;S-Fe3_GL0042534	14.347	NA	NA	15.2071	NA	13.0999	12.1685	NA	NA	NA	15.0853	NA	14.2713	14.3445	14.4285	NA	NA	12.0065	14.7989	NA	NA	NA	13.4781	NA
10_GL0059878;G1-1A_GL0071501;S-Fe10_GL0157485;S-Fe3_GL0042534	13.1734	14.3217	13.6863	14.708	13.7162	13.4217	NA	13.1559	13.7584	NA	13.8199	13.2416	14.4466	NA	14.1421	NA	NA	NA	14.542	13.4861	13.5446	14.5848	13.2678	NA
10_GL0059878;S-Fe10_GL0019286;S-Fe3_GL0042534	NA	NA	NA	NA	NA	10.8843	NA	9.99946	NA	NA	10.2783	NA	11.6719	10.6163	11.548	NA	NA	NA	11.936	NA	NA	12.9933	10.841	NA
10_GL0060041	16.1427	16.5196	16.3645	15.7671	13.7434	14.2206	13.4161	15.5858	14.7992	14.9692	15.5937	15.844	14.4349	13.7242	14.2926	15.135	15.617	14.1419	14.6862	15.3764	13.9489	13.9787	14.7693	15.447
10_GL0060834;11_GL0025984;11_GL0139858;2A-dyr14-07_GL0034700;4-5_GL0107020;4-8_GL0028287;5-1_GL0032559;G1-2A_GL0020340	NA	14.3945	NA	NA	15.7119	NA	NA	NA	NA	NA	NA	NA	NA	15.5847	16.9733	15.3734	15.0808	NA	NA	NA	NA	NA	NA	NA
10_GL0060834;11_GL0025984;20_GL0130969;20_GL0135402;2A-dyr14-07_GL0034700;6-4_GL0083690;8-2_GL0105766;S-Fe20_GL0000975;S-Fe3_GL0046178	14.7526	14.5277	15.3634	14.7809	16.0989	17.4663	17.2349	17.6134	15.6117	13.8489	15.6578	14.9979	15.83	16.6227	16.8806	15.4797	16.4051	15.8878	16.5999	15.5043	16.6131	16.4937	16.926	15.1036
10_GL0060834;11_GL0025984;20_GL0130969;2A-dyr14-07_GL0034700;6-4_GL0083690;S-Fe20_GL0000975;S-Fe3_GL0046178	17.1563	14.9422	15.697	15.7512	16.9257	17.0169	18.1629	16.7617	16.481	15.5251	16.9382	16.5142	16.4515	17.3727	18.0058	16.0102	17.2548	17.3367	17.6459	17.4711	17.6671	16.4239	16.9201	16.1509
10_GL0060834;11_GL0025984;2A-dyr14-07_GL0034700	NA	NA	NA	NA	NA	11.7535	NA	12.9473	NA	NA	NA	NA	NA	NA	NA	NA	NA	NA	NA	NA	14.1439	12.604	13.2015	NA
10_GL0060834;11_GL0025984;2A-dyr14-07_GL0034700;4-1_GL0031018;4-8_GL0028287;5-1_GL0082386;7-5_GL0000314;8-2_GL0105766;G1-2A_GL0020340;Group2-2A_GL0071636;Group2-7A_GL0004988	NA	NA	NA	NA	NA	NA	NA	NA	NA	NA	NA	16.324	NA	NA	NA	NA	NA	NA	NA	NA	17.3477	NA	NA	NA
10_GL0060834;11_GL0025984;2A-dyr14-07_GL0034700;4-1_GL0031018;4-8_GL0028287;7-5_GL0000314;8-2_GL0105766;G1-2A_GL0020340;Group2-2A_GL0071636;Group2-7A_GL0013216	11.8729	NA	NA	NA	NA	NA	NA	NA	NA	NA	NA	NA	NA	NA	NA	NA	NA	NA	NA	NA	NA	NA	NA	NA
10_GL0060834;11_GL0025984;2A-dyr14-07_GL0034700;4-8_GL0028287;8-2_GL0105766	NA	NA	13.5278	12.0926	13.447	14.5065	14.8198	14.0951	NA	NA	NA	NA	12.5283	13.9375	14.3336	14.4517	13.4392	12.9237	12.8302	13.3267	13.6939	14.583	15.6336	12.5176
10_GL0062623	13.9449	12.3259	12.2142	NA	NA	14.2539	NA	13.2165	NA	NA	NA	13.0466	13.6958	NA	NA	NA	NA	NA	13.5031	NA	13.6761	11.6576	NA	NA
10_GL0063323;16_GL0089899	NA	13.6892	11.5512	13.8925	11.0821	NA	10.9868	NA	12.0359	NA	12.0086	NA	NA	10.8047	11.2298	NA	NA	NA	12.7144	11.7643	NA	NA	NA	NA
10_GL0063323;2-1_GL0079956	NA	NA	NA	NA	NA	NA	NA	17.4243	15.5757	17.7999	NA	17.0318	NA	NA	NA	NA	NA	NA	NA	NA	16.4424	NA	16.7759	16.3221
10_GL0063323;40_GL0054978;MC-0-3_GL0016791;MC-6-1_GL0007984	15.6748	15.5709	14.6178	14.8913	14.3373	13.1442	13.2662	NA	NA	NA	17.025	12.6024	14.6091	14.0136	14.1251	12.176	13.6659	13.3239	NA	NA	NA	NA	NA	11.852
10_GL0063323;MC-0-3_GL0016791	16.2697	16.8314	16.203	16.2082	15.7558	15.452	13.8608	15.9403	15.0786	13.4192	16.7779	13.8852	15.799	15.7336	15.4913	13.6742	15.4054	14.3589	15.5832	15.6256	14.0118	14.1202	14.919	12.006
10_GL0063584;MC-0-1_GL0015266	11.8981	12.8486	10.78	12.63	NA	10.0104	NA	NA	NA	NA	12.8383	NA	12.2399	NA	NA	10.0621	NA	NA	13.2161	12.0874	NA	12.3764	NA	NA
10_GL0063584;MC-0-1_GL0015266;MC-0-1_GL0091805	12.4284	NA	13.2229	13.9495	13.246	13.0952	NA	13.1145	12.304	NA	13.804	NA	13.3801	13.2177	14.8102	NA	12.5656	11.4979	14.1001	13.9094	12.2276	12.8907	11.6446	NA
10_GL0063930	NA	15.7432	13.8409	13.6427	15.9472	15.8222	15.5627	15.3038	15.0921	14.3745	16.1491	14.7319	13.2341	15.9126	16.2489	14.5612	16.673	16.3947	15.8703	14.777	16.9792	15.1167	16.0355	15.7674
10_GL0065599	15.4419	15.3215	15.4998	14.5532	12.6907	13.5059	12.5602	14.4649	14.0249	14.916	14.8552	14.7906	12.7197	12.6833	12.2112	14.1566	14.5928	13.3635	13.1293	15.0916	12.3188	13.1933	13.1609	14.4361
10_GL0065600	14.1432	13.8701	14.1702	13.1757	12.338	12.409	11.6938	13.5633	13.169	13.1491	13.69	13.9745	12.1427	12.0709	NA	12.6824	13.461	12.139	12.0205	13.6019	11.2972	12.102	12.0344	12.8994
10_GL0066865	13.7007	17.0575	14.9705	17.1653	14.0234	11.3406	11.6999	NA	12.5749	NA	15.1559	NA	14.3396	14.1469	13.3032	12.322	NA	NA	14.969	13.3294	NA	NA	11.0295	NA
10_GL0068853	NA	NA	NA	NA	NA	NA	NA	NA	NA	NA	NA	NA	NA	NA	11.9609	NA	NA	NA	NA	NA	NA	NA	13.9301	11.8093
10_GL0070277	NA	NA	NA	NA	NA	12.4578	NA	13.8439	12.7165	NA	NA	13.8378	13.4515	NA	13.811	12.7627	NA	NA	NA	14.3855	14.1905	13.2279	13.0994	NA
10_GL0070277;11_GL0052466;2A-dyr14-07_GL0059822;4-1_GL0033815	NA	NA	NA	12.7814	13.8836	13.0901	14.1285	11.3597	NA	NA	NA	NA	13.5463	14.0412	14.1832	13.8	13.9983	11.0613	12.8883	NA	14.1938	15.2366	11.4945	13.3987
10_GL0070277;11_GL0052466;2A-dyr14-07_GL0059822;4-7_GL0146230;4-8_GL0047587;7-1_GL0073646	NA	NA	NA	NA	NA	13.1323	11.8414	12.5103	NA	NA	NA	NA	14.1112	NA	NA	NA	NA	NA	12.9917	NA	13.2951	13.4355	12.3897	NA
10_GL0070277;4-1_GL0033815;6-1_GL0059396	NA	NA	NA	NA	NA	NA	NA	NA	NA	NA	NA	NA	NA	NA	11.4462	NA	NA	NA	NA	NA	NA	11.5393	11.2356	NA
10_GL0071530	15.9599	15.4805	15.649	15.0159	13.8055	13.9207	13.2486	14.6108	14.3738	14.7273	15.0493	15.2797	13.1197	13.2833	13.6327	14.2909	14.9489	13.6271	13.4583	15.0384	12.4496	13.5267	13.4505	14.1931
10_GL0075367	NA	NA	NA	NA	NA	NA	NA	NA	NA	NA	NA	NA	16.3325	NA	17.1141	NA	NA	NA	NA	NA	18.3864	NA	12.3338	NA
10_GL0075367;1A-dyr4-07_GL0048670	NA	NA	NA	NA	NA	NA	NA	NA	NA	NA	NA	NA	16.0268	NA	16.5477	NA	NA	NA	NA	NA	17.7133	NA	12.1522	12.5191
10_GL0077403;2-5_GL0052916;5_GL0165385;8-1_GL0072991;Group2-2A_GL0072583	16.5176	16.5422	16.5103	16.257	17.9006	17.3581	16.7148	16.9013	17.5415	16.1237	NA	NA	17.419	17.8965	17.2961	17.5435	17.1989	16.5843	17.5823	17.0928	16.7856	NA	16.5609	16.6857
10_GL0077463	NA	NA	NA	12.6031	11.3693	12.2899	NA	12.7633	11.6425	NA	NA	NA	NA	11.5605	NA	NA	11.1987	NA	NA	NA	NA	13.8318	NA	10.7566
10_GL0086254	14.6548	14.2509	14.012	13.6115	12.5619	12.2935	NA	13.9491	12.9543	13.3885	13.5702	14.4297	11.5454	NA	NA	13.1282	13.8277	11.7106	11.8842	13.3867	11.553	12.247	11.801	12.8405
10_GL0087224	14.0422	15.6118	14.5592	15.8653	14.6034	14.253	12.8049	15.2606	13.7556	14.1442	14.8068	15.1667	14.1645	14.534	13.7961	12.9408	15.0356	14.738	14.9907	14.9797	15.4586	14.9411	14.0794	13.9644
10_GL0087224;MC-0-3_GL0005764	NA	NA	NA	12.3998	12.1471	12.064	NA	12.3734	NA	NA	11.3599	NA	12.7094	12.4733	13.246	NA	12.2836	11.1511	12.6044	NA	11.8346	12.6593	NA	NA
10_GL0091753	NA	NA	10.7975	NA	NA	13.9529	NA	NA	NA	NA	NA	NA	NA	NA	NA	NA	NA	NA	NA	NA	NA	11.9639	NA	NA
10_GL0092158	NA	NA	NA	NA	NA	NA	NA	NA	NA	NA	NA	NA	NA	NA	NA	NA	NA	NA	NA	NA	NA	NA	11.1869	12.9031
10_GL0092158;2-1_GL0006671;Group2-8A_GL0016355	NA	NA	NA	NA	11.7966	NA	NA	NA	NA	NA	NA	11.7842	12.3185	11.9013	NA	11.6374	11.3511	10.8969	11.5758	11.4602	NA	11.9118	11.9836	10.8768
10_GL0092158;2-5_GL0008306;7-1_GL0021529;Group2-8A_GL0016355	NA	NA	11.3935	NA	11.982	11.5876	12.5837	10.5638	11.1914	10.8383	NA	8.52914	11.5925	12.4598	11.7521	12.0194	11.8289	11.4664	NA	NA	12.4234	NA	NA	11.7127
10_GL0093032	NA	NA	12.0662	15.0762	NA	NA	NA	NA	NA	NA	NA	NA	NA	NA	11.2628	12.5742	NA	NA	NA	NA	NA	NA	NA	NA
10_GL0094576;2-3_GL0088583;G1-1A_GL0081041;S-Fe12_GL0076409	15.1756	NA	NA	NA	NA	13.601	14.8522	13.3356	13.4343	NA	NA	NA	NA	NA	NA	NA	NA	NA	NA	15.1109	NA	NA	NA	NA
10_GL0095502	15.8977	15.4488	15.5954	14.8589	12.956	13.599	12.3833	14.9778	14.3195	15.0631	14.8835	15.2188	13.0024	12.943	13.1576	14.0179	14.5604	13.2934	13.2363	14.8896	12.5721	13.2817	13.5157	14.1829
10_GL0097774	NA	NA	NA	10.3102	9.24598	10.6446	NA	NA	NA	NA	NA	NA	NA	NA	11.1341	NA	NA	NA	NA	NA	10.6651	NA	NA	NA
10_GL0097774;2B-dyr19-06_GL0042982;Group2-3A_GL0107655;S-Fe10_GL0098581;S-Fe11_GL0040019	12.6597	14.2711	14.1225	15.2139	13.5947	14.1787	10.8407	13.3413	11.6936	11.4896	13.3127	11.9312	15.4034	13.7979	14.1173	11.9945	11.3575	10.8635	13.9058	13.1443	14.2489	14.4767	NA	NA
10_GL0097774;2B-dyr19-06_GL0042982;Group2-3A_GL0107655;S-Fe11_GL0040019	NA	11.7251	NA	13.2341	12.9072	12.89	NA	8.68435	NA	NA	NA	NA	12.8415	12.8072	13.6941	NA	NA	NA	12.2214	11.9658	NA	14.5126	NA	NA
10_GL0097774;2B-dyr19-06_GL0042982;S-Fe11_GL0040019	13.117	14.5664	14.1044	14.6306	11.6808	13.9794	11.3154	NA	NA	NA	13.3927	NA	14.1815	11.8499	13.7541	11.6345	11.2689	12.1301	13.2721	14.164	13.1618	15.7831	NA	NA
10_GL0097774;Group2-3A_GL0107655	11.9563	11.9383	NA	11.5024	NA	12.5492	10.4386	NA	NA	NA	12.0073	NA	12.0197	NA	12.808	NA	NA	NA	NA	10.9578	10.9181	12.5302	NA	NA
10_GL0097774;Group2-3A_GL0107655;S-Fe11_GL0040019	NA	NA	NA	12.6096	NA	12.1731	NA	NA	NA	NA	NA	NA	12.3503	NA	11.566	NA	NA	NA	NA	NA	NA	12.8	NA	NA
10_GL0098958	14.797	16.2404	15.6871	16.0913	14.0304	16.0393	13.7381	15.377	14.4905	14.4405	15.1981	14.4865	14.9061	13.8672	15.7078	14.9089	14.9656	14.8266	14.072	15.6419	14.8416	16.096	14.5743	12.7595
10_GL0098958;7-7_GL0023089;S-Fe10_GL0047359;S-Fe15_GL0009376	NA	NA	NA	NA	NA	NA	NA	NA	NA	NA	NA	12.3973	NA	NA	NA	NA	NA	NA	NA	NA	NA	14.0746	13.5499	NA
10_GL0100485;S-Fe11_GL0031229	13.6669	14.8667	15.3306	14.8118	13.4482	14.5432	12.3898	13.321	13.5171	14.0419	14.5742	13.4409	14.3454	13.5978	14.8725	13.516	13.9103	13.2939	14.548	15.0833	14.1764	15.7657	13.1745	NA
1-1_GL0001033	NA	NA	NA	NA	14.8355	NA	13.3225	NA	NA	NA	NA	NA	NA	14.8775	15.1702	NA	12.9262	NA	NA	NA	NA	NA	NA	NA
1-1_GL0001033;1-1_GL0114862	NA	NA	NA	11.3589	13.456	NA	NA	NA	NA	NA	NA	NA	NA	13.1992	13.6192	12.3841	11.7168	NA	13.2224	NA	NA	13.7452	NA	NA
1-1_GL0001033;1-1_GL0114862;3-5_GL0002451;S-Fe2_GL0048785;S-Fe2_GL0161391	NA	NA	NA	NA	14.0349	13.3692	14.1927	12.7568	13.6871	11.8332	NA	13.4978	15.687	13.9219	13.9643	12.5266	12.7355	13.4134	14.4934	13.3887	15.1731	12.8053	12.3051	11.8256
1-1_GL0001033;1-1_GL0114862;3-5_GL0002451;S-Fe2_GL0161391	NA	9.21198	10.4262	10.189	12.9033	12.2015	12.3649	11.5545	11.834	10.0274	11.5571	NA	13.9878	13.1205	13.0495	11.7641	11.719	11.078	12.9222	10.9397	13.4169	12.581	NA	NA
1-1_GL0001033;1-1_GL0114862;S-Fe2_GL0048785;S-Fe2_GL0161391	13.963	12.7393	13.3204	13.2429	15.5461	14.7861	15.1179	13.6408	14.5638	12.7576	14.8146	13.4408	17.5932	15.6365	15.7224	13.7137	13.2552	14.062	16.304	14.5918	16.1914	15.6183	NA	11.9692
1-1_GL0001033;1-1_GL0114862;S-Fe2_GL0161391	NA	NA	NA	NA	13.6808	13.5572	NA	NA	13.7144	NA	NA	NA	14.872	13.7857	NA	NA	NA	NA	14.4602	NA	15.0011	14.2262	NA	NA
11_GL0001401;11_GL0101716;1A-dyr4-07_GL0084261;20_GL0023401;23_GL0066357;4-7_GL0047847;8-3_GL0099290	15.838	13.6849	14.6705	14.2912	16.4546	16.7358	17.001	16.7657	16.2974	15.9299	15.3451	15.6222	16.3213	16.3431	15.6743	17.2402	16.4817	16.8908	15.7373	16.1093	16.1449	17.2711	17.3356	15.6213
11_GL0001401;11_GL0101716;1A-dyr4-07_GL0084261;20_GL0023401;35_GL0104729;4-7_GL0047847;8-3_GL0099290	14.5627	13.6107	13.8464	14.1259	15.9714	16.5046	15.5961	15.7683	15.2604	14.2277	15.2611	13.3698	15.9034	15.9561	15.0802	16.8298	15.753	16.1373	15.8151	NA	16.0226	17.6419	16.5841	14.1974
11_GL0001401;11_GL0101716;1A-dyr4-07_GL0084261;20_GL0023401;4-7_GL0047847;8-3_GL0099290	14.9102	13.2335	14.1826	14.0552	15.809	16.138	16.1423	16.253	14.9359	15.0572	14.8164	14.2448	15.772	15.9825	15.1086	16.9247	15.2012	15.9181	15.2501	15.2961	16.0589	16.6316	16.5807	16.4988
11_GL0001401;11_GL0101716;23_GL0066357;4-7_GL0047847;8-3_GL0099290	14.113	NA	13.4699	13.3143	15.7736	15.2035	16.2801	16.1947	14.3221	13.9201	13.4726	13.8438	15.0225	15.8078	15.0773	16.2856	15.1901	15.6593	14.6408	15.3532	15.7488	14.6854	17.0623	15.2822
11_GL0001401;11_GL0101716;35_GL0104729;4-7_GL0047847;8-3_GL0099290	14.4755	NA	NA	NA	15.5265	NA	NA	15.2502	14.8767	13.9284	NA	NA	NA	15.3367	13.1467	NA	NA	NA	NA	NA	14.3712	NA	NA	NA
11_GL0001401;11_GL0101716;4-7_GL0047847;8-3_GL0099290	12.9907	11.2795	14.2147	13.0448	15.4134	14.6802	15.451	15.3755	13.235	12.9279	12.9195	13.9203	13.9124	15.3944	14.3648	16.3422	15.2517	14.7998	13.4297	14.6465	14.927	14.4725	16.6496	14.6204
11_GL0001401;11_GL0101716;8-3_GL0099290	NA	NA	11.5022	10.1552	13.0193	13.1993	14.174	13.4452	10.7941	NA	10.3143	NA	12.1945	13.2278	NA	13.9012	13.0307	11.7146	11.8209	NA	12.9365	12.2662	14.871	11.8624
11_GL0001401;35_GL0104729;4-7_GL0047847;8-3_GL0099290	10.5322	NA	NA	NA	12.6527	NA	12.2532	12.3074	NA	NA	NA	11.6375	12.7102	12.5327	11.9196	12.472	11.963	NA	NA	NA	12.388	12.7015	12.2106	12.2746
11_GL0001401;4-7_GL0047847	11.4597	NA	NA	NA	NA	NA	NA	NA	NA	NA	NA	NA	NA	NA	11.5441	NA	NA	NA	NA	NA	NA	NA	NA	NA
1-1_GL0001529	NA	NA	11.4515	NA	13.6348	NA	12.3921	12.2842	12.6037	NA	NA	12.0634	13.8333	13.6567	13.1098	13.1092	12.3945	NA	14.4004	NA	14.037	NA	13.0797	12.3093
1-1_GL0001529;10_GL0025715;1A-dyr2-07_GL0013682;2-1_GL0020071;4-1_GL0068219;4-8_GL0081263;7-1_GL0085595;8-2_GL0016640;8-7_GL0053386;MC-0-1_GL0045090;S-Fe12_GL0199546	16.666	15.4692	15.9681	16.0228	17.5175	17.4354	17.2925	16.5078	17.1149	14.7936	17.0369	16.6427	18.3672	17.5207	17.761	16.7748	16.1204	16.8369	18.1251	17.5734	18.1553	17.6148	15.8595	15.2338
1-1_GL0001529;10_GL0025715;2-1_GL0020071	16.2767	14.9659	15.7967	15.0695	16.8973	15.4055	16.7075	15.2931	15.931	14.0181	16.0199	15.8427	16.8623	17.0993	17.0956	16.035	15.5533	15.3179	16.9894	16.4227	16.6084	15.7779	15.3416	15.359
1-1_GL0001529;10_GL0025715;2-1_GL0020071;2-1_GL0103287;2-2_GL0080396;4-1_GL0068219;4-8_GL0081263;7-1_GL0085595;8-2_GL0016640;8-7_GL0053386;MC-0-3_GL0011656;S-Fe12_GL0199546	NA	NA	NA	NA	13.9097	NA	13.4097	NA	13.9122	11.6354	12.4246	12.8932	14.758	13.6529	NA	12.3456	13.2574	12.6831	14.3999	13.1759	14.5552	13.8185	13.6529	12.066
1-1_GL0001529;10_GL0025715;2-1_GL0020071;2-1_GL0103287;2-2_GL0080396;4-1_GL0068219;4-8_GL0081263;7-1_GL0085595;MC-0-3_GL0011656	16.9916	15.5596	16.0055	15.7318	18.1023	17.378	17.892	16.6296	17.3898	15.4048	17.1152	17.0538	17.9627	18.1598	18.088	17.1497	16.1571	16.7593	18.1546	17.584	17.4984	17.3105	16.3219	16.0905
1-1_GL0001529;10_GL0025715;2-1_GL0020071;2-1_GL0103287;2-2_GL0080396;8-2_GL0016640;8-7_GL0053386;MC-0-1_GL0045090;MC-0-3_GL0011656;S-Fe12_GL0199546	16.3768	14.5532	15.2503	14.2387	16.0772	14.4045	16.8001	14.5941	14.8864	11.3691	15.9894	NA	17.2622	16.1364	17.8851	15.0308	10.8183	14.6335	14.0207	12.6538	17.1892	14.3341	14.6753	13.7921
1-1_GL0001529;10_GL0025715;2-1_GL0020071;4-1_GL0068219;4-8_GL0081263;7-1_GL0085595;8-2_GL0016640;8-7_GL0053386;MC-0-1_GL0045090;MC-0-3_GL0011656	NA	NA	NA	NA	NA	NA	NA	NA	11.6928	NA	NA	NA	13.0398	12.1387	12.7859	NA	NA	NA	NA	NA	12.1625	NA	NA	NA
1-1_GL0001529;10_GL0025715;2-1_GL0020071;4-1_GL0068219;4-8_GL0081263;7-1_GL0085595;MC-0-1_GL0045090	15.4937	13.5911	14.1373	13.5947	15.8389	13.3647	15.7851	14.2645	15.1116	14.1877	15.1096	16.0817	15.1752	15.8749	14.7735	15.3506	15.0188	14.6317	15.3458	14.9893	15.1467	13.5561	14.9631	14.9715
1-1_GL0001529;10_GL0025715;2-1_GL0103287;2-2_GL0080396;4-1_GL0068219;4-8_GL0081263;7-1_GL0085595;8-2_GL0016640;8-7_GL0053386;MC-0-1_GL0045090;MC-0-3_GL0011656	13.9359	13.5892	13.3112	NA	15.9685	15.9017	15.7115	NA	15.4802	14.2459	15.6424	14.5727	16.2737	15.9706	15.8062	14.4879	15.4669	15.6156	16.3743	15.9175	16.0947	15.8417	15.4175	14.7549
1-1_GL0001529;2-1_GL0020071	16.2429	13.0583	14.932	13.5994	15.8654	14.8395	16.6007	14.1858	14.4634	13.0705	15.2152	14.8995	15.5166	16.0098	15.9406	14.7932	14.1147	14.6207	15.4731	16.1984	15.7405	13.6777	13.8722	14.2286
1-1_GL0002023;8-2_GL0080684	NA	NA	NA	NA	14.8525	14.9253	16.2979	14.4827	13.1523	NA	13.2538	14.7559	14.4484	15.0343	NA	13.3744	NA	NA	NA	14.9334	15.0559	NA	12.8368	NA
11_GL0002095;6-3_GL0073361;MC-6-2_GL0150055	14.3409	NA	NA	NA	NA	13.9923	15.6142	14.1403	13.76	NA	14.0287	NA	14.954	NA	16.2059	14.2769	14.1115	NA	14.5691	14.4665	14.5306	15.2499	NA	NA
11_GL0002095;G1-5A_GL0009874;MC-6-2_GL0150055;S-Fe2_GL0150500	15.2332	15.0145	14.7447	15.3378	15.5942	16.1523	16.3594	16.2037	15.0351	14.6358	15.4664	14.3935	15.5415	15.3441	16.2386	14.981	16.4321	15.3012	15.3336	15.0498	14.8019	15.3274	14.4777	15.2246
11_GL0002095;MC-6-2_GL0150055	NA	NA	10.4405	11.9541	NA	10.236	NA	9.89822	NA	NA	10.8277	NA	11.4043	NA	12.1159	NA	NA	NA	10.7394	10.9895	NA	NA	NA	NA
1-1_GL0002265	NA	NA	NA	12.4325	12.1949	12.5269	11.2235	13.6729	11.7131	11.3308	NA	NA	11.5629	11.7804	NA	NA	12.1313	NA	NA	NA	11.9337	14.9116	11.1292	12.218
1-1_GL0002265;1-7_GL0092975	12.7558	13.7286	13.5017	16.6926	14.9627	15.613	14.8867	16.5201	14.7307	14.0538	13.5858	12.1681	14.1905	14.9678	14.0172	14.2236	14.785	12.9002	12.9899	13.1835	14.2161	17.9039	13.7965	14.9901
1-1_GL0003043	NA	NA	NA	NA	11.9163	12.4937	10.7776	NA	NA	NA	NA	NA	12.2709	12.2188	12.3572	11.6079	NA	NA	NA	NA	12.4404	12.7836	NA	11.9937
1-1_GL0003043;1A-dyr4-07_GL0055880	12.4588	10.856	11.5549	11.1896	13.2876	13.6146	14.2531	11.6997	12.6504	11.5012	13.4578	13.2832	13.5599	13.4913	13.8694	11.5078	12.2095	13.5836	12.6539	13.4128	13.0825	12.4787	12.2728	12.2318
1-1_GL0003043;1A-dyr4-07_GL0055880;3-7_GL0034754;Group2-7A_GL0109897;MC-6-4_GL0000211;MH-6-1_GL0054828;MH-6-4_GL0044125;S-Fe20_GL0051579	13.751	NA	13.2426	14.0059	15.1987	14.7418	15.3028	14.7973	14.5147	NA	14.4302	14.4361	14.8564	15.1923	15.053	NA	14.3468	14.7971	14.6243	14.8087	15.0229	14.9364	14.0864	14.2625
1-1_GL0003043;1A-dyr4-07_GL0055880;Group2-7A_GL0109897;MC-6-4_GL0000211	NA	NA	NA	NA	12.412	12.7501	NA	12.6888	12.2721	NA	NA	NA	12.5029	11.8238	NA	NA	11.8745	NA	12.4277	NA	12.9554	12.3049	NA	NA
1-1_GL0003043;1A-dyr4-07_GL0055880;MH-6-1_GL0054828	NA	NA	NA	NA	11.0497	11.3795	11.563	11.03	NA	NA	NA	NA	10.9271	11.2035	NA	NA	10.1692	NA	10.3308	NA	11.3974	11.5181	NA	9.98768
1-1_GL0003043;3-7_GL0034754;Group2-7A_GL0109897;MC-6-4_GL0000211;MH-6-4_GL0044125;S-Fe20_GL0051579	12.7709	13.1647	NA	13.46	14.2308	14.5878	13.921	13.7767	13.2395	NA	13.7351	12.1889	14.6242	14.3019	14.4089	13.7861	NA	NA	14.4149	13.8019	14.4924	14.5371	12.9898	12.9479
1-1_GL0003043;3-7_GL0034754;MC-6-4_GL0000211;MH-6-4_GL0044125	NA	NA	NA	NA	11.326	10.7562	11.4839	10.454	NA	NA	10.476	NA	12.0351	11.0965	8.89233	10.6298	NA	NA	11.0869	NA	11.0165	11.4742	9.83246	10.0262
1-1_GL0003043;Group2-7A_GL0109897	12.6475	12.218	11.2779	12.7287	13.8274	14.6719	13.7812	13.4709	12.8922	11.5532	13.3264	12.4154	14.341	13.8158	14.3111	13.3771	12.2434	12.4994	14.1371	13.4416	14.2556	14.2473	12.9718	12.9237
1-1_GL0003046;2-7_GL0030149;5-5_GL0025948;MH-6-1_GL0001405;S-Fe20_GL0024156	NA	NA	NA	NA	13.5745	12.1636	14.3388	NA	NA	NA	13.7896	12.5416	14.2124	14.0289	13.9286	NA	NA	13.1497	13.5906	12.3672	13.8505	12.7945	NA	NA
1-1_GL0003046;2-7_GL0030149;MH-6-1_GL0001405;MH-6-3_GL0025057;S-Fe20_GL0024156	16.0811	15.6892	15.8309	15.6913	17.3152	17.0839	17.0338	16.1786	16.8634	15.1613	16.4996	15.9594	17.973	17.3376	17.7347	16.1624	16.148	16.4396	17.4256	16.633	17.5183	17.0153	16.0402	15.2597
1-1_GL0003046;2-7_GL0030149;MH-6-1_GL0001405;S-Fe20_GL0024156	NA	12.5073	NA	NA	13.0757	NA	NA	NA	NA	NA	NA	NA	14.0108	13.5743	14.0112	12.2727	12.5835	NA	12.5678	NA	13.8041	13.1571	13.2732	NA
11_GL0003265	NA	NA	NA	NA	13.311	NA	NA	NA	NA	13.415	NA	NA	14.2842	13.3684	13.6639	12.2221	14.164	NA	NA	NA	15.2826	14.2798	NA	11.5156
11_GL0003265;3-3_GL0033464	NA	NA	14.6635	12.9426	15.0642	16.1566	16.1804	16.1005	10.7158	15.0204	NA	NA	14.1444	15.0568	14.7691	16.1815	13.7452	15.3554	12.9227	15.7221	15.6086	14.6782	16.3562	12.4992
1-1_GL0003333	NA	NA	NA	12.2979	NA	NA	NA	NA	NA	NA	NA	NA	NA	NA	NA	NA	NA	NA	NA	NA	NA	NA	NA	NA
11_GL0003545	15.0747	15.9369	13.9789	14.2529	12.2909	NA	13.1541	15.1793	NA	NA	15.4808	14.7384	14.3801	NA	14.5917	14.2116	14.5833	13.309	14.8939	15.1969	13.6666	13.0122	15.4954	14.5361
11_GL0003656;43_GL0071674	NA	NA	NA	NA	15.404	NA	NA	NA	NA	NA	NA	NA	16.8504	15.4366	NA	NA	NA	13.868	NA	NA	NA	NA	NA	NA
1-1_GL0003946	12.4907	11.617	13.1431	11.6627	12.6202	13.6267	12.5113	12.6471	10.8983	NA	13.5173	12.9102	12.8736	12.736	13.4841	12.9355	11.465	NA	12.2776	11.8774	13.083	13.3117	13.3564	12.9619
11_GL0004412;2-1_GL0047628;S-Fe8_GL0083926	17.801	15.4645	15.9349	NA	17.5287	16.8476	18.5674	16.6174	17.7567	16.5238	17.9808	18.7436	18.1274	17.6868	17.8926	17.1427	17.6026	17.1893	17.9314	18.073	17.5808	15.9689	17.3083	17.0919
1-1_GL0004559	13.6183	11.9361	12.4178	11.9152	14.6123	13.8471	15.2089	12.6089	13.6097	12.6383	13.5988	13.7087	15.6311	14.6423	14.177	13.5499	13.6416	13.802	14.2799	13.4772	15.1668	NA	13.1147	13.2162
11_GL0005088	NA	NA	NA	NA	NA	NA	NA	NA	NA	11.5254	NA	NA	12.0663	NA	10.1237	NA	NA	NA	NA	NA	12.3073	NA	NA	NA
11_GL0005088;5-2_GL0089211	NA	NA	NA	11.9636	12.4809	13.4648	NA	13.3248	NA	12.9562	NA	NA	NA	12.3815	12.3423	13.3672	NA	NA	NA	NA	12.7671	14.2506	NA	13.2652
1-1_GL0005528	13.8108	12.5759	13.7858	NA	13.3195	14.4255	NA	14.0425	13.8882	11.0285	13.8747	NA	12.2774	12.8033	13.0119	NA	14.3447	13.4343	14.3004	12.9482	13.3113	NA	NA	13.0479
1-1_GL0005528;2-4_GL0077639	NA	NA	13.0819	NA	13.1688	NA	NA	13.4665	12.7738	NA	13.3895	NA	NA	13.4279	13.1694	13.841	13.7176	NA	14.0614	NA	13.0968	NA	NA	13.4377
1-1_GL0005606;1-1_GL0139232;1-4_GL0018680;10_GL0058023;11_GL0070877;1A-dyr2-07_GL0000560;1A-dyr4-07_GL0087490;2-1_GL0050422;2-3_GL0042092;2-8_GL0024049;5-1_GL0057216;5-2_GL0060633;6-2_GL0080040;8-1_GL0050324;8-2_GL0134682;G1-1A_GL0036162;G1-2A_GL0045365;G1-5A_GL0012956;G1-7A_GL0047546;Group2-2A_GL0080405;Group2-3A_GL0133186;S-Fe3_GL0136318	18.4846	17.1117	17.0606	17.4449	19.1098	19.09	19.5428	18.5007	18.9904	16.6623	18.5608	18.1813	19.5209	NA	19.2186	17.9807	17.7052	18.1852	19.7968	18.7873	19.1632	19.235	18.1154	17.576
1-1_GL0005606;1-1_GL0139232;1-4_GL0018680;10_GL0058023;11_GL0070877;2-1_GL0050422;2-3_GL0042092;2-8_GL0024049;5-1_GL0057216;5-2_GL0060633;6-2_GL0080040;G1-1A_GL0036162;G1-2A_GL0045365;G1-5A_GL0012956;G1-7A_GL0047546;Group2-3A_GL0133186	16.2834	15.7474	15.9872	16.2823	17.329	16.7973	16.6475	15.7288	16.5953	15.2008	16.2398	15.827	17.3961	17.3162	15.5	16.4399	NA	15.516	16.2765	15.1115	17.1888	17.0632	15.815	15.63
1-1_GL0005606;1-1_GL0139232;1-4_GL0018680;10_GL0058023;2-1_GL0050422;2-3_GL0042092;2-8_GL0024049;5-1_GL0057216;5-2_GL0060633;6-2_GL0080040;G1-1A_GL0036162;G1-2A_GL0045365;G1-5A_GL0012956;G1-7A_GL0047546;Group2-3A_GL0133186	NA	NA	NA	NA	NA	NA	NA	11.2807	NA	NA	NA	NA	13.9421	NA	NA	NA	NA	NA	NA	NA	13.1821	NA	11.2219	NA
11_GL0006171	11.3369	NA	11.8666	NA	12.5654	12.9218	14.476	13.2247	NA	NA	NA	NA	11.4184	12.6507	NA	12.28	NA	11.906	12.1836	12.0779	11.4039	NA	12.3882	NA
11_GL0006171;2-6_GL0080553;4-7_GL0137206;MH-0-3_GL0092162;S-Fe7_GL0245275	NA	NA	NA	NA	NA	NA	NA	13.2262	NA	NA	NA	NA	13.4165	NA	NA	NA	13.1499	NA	13.3772	NA	12.0898	NA	NA	NA
11_GL0006171;4-7_GL0137206;S-Fe7_GL0245275	NA	NA	11.9541	12.1303	12.9519	13.6437	14.1512	13.8983	12.8031	NA	NA	NA	12.4817	13.277	11.9115	13.1882	13.8937	12.6318	NA	13.5681	12.8833	NA	12.8602	12.9455
11_GL0006534	NA	11.1383	NA	10.3213	13.2376	13.5853	NA	12.3421	12.141	NA	NA	11.2933	13.6636	13.2714	12.9163	12.0036	12.8207	11.3177	NA	NA	13.4879	13.9022	10.9679	13.0231
11_GL0006534;11_GL0111646	10.3709	NA	11.1631	NA	12.7946	13.3419	13.1969	12.8273	11.5004	NA	12.0163	NA	12.4979	12.7787	12.2303	12.5035	11.8767	12.2713	12.4939	NA	13.2701	13.7772	12.9272	12.2166
11_GL0006534;11_GL0111646;2-1_GL0010886;2-1_GL0051897;2-1_GL0082032;2-1_GL0096565;2-3_GL0084512;2-5_GL0056919;4-1_GL0079156;6-4_GL0014602;7-5_GL0112828;G1-8A_GL0047995;Group2-2A_GL0060000;Group2-2A_GL0069764;Group2-3A_GL0194212;Group2-6A_GL0031198;Group2-7A_GL0049719;S-Fe20_GL0076361;S-Fe20_GL0133804	13.6455	11.5341	12.2786	11.6847	14.0627	14.1231	14.1552	13.7598	13.9127	NA	13.542	13.2739	14.5127	14.0958	14.418	12.9923	13.3022	12.9523	14.1325	12.0499	13.554	13.2321	13.1677	13.5494
11_GL0006534;11_GL0111646;2-1_GL0010886;2-1_GL0051897;2-1_GL0096565;2-3_GL0084512;6-4_GL0014602;G1-8A_GL0047995;Group2-2A_GL0060000;Group2-3A_GL0194212	16.8276	14.2771	15.178	14.727	17.1385	16.3831	17.9757	16.277	16.8659	15.6135	16.9935	17.0078	17.1559	17.2521	16.7596	16.514	16.2127	16.8826	17.239	17.4288	17.2083	16.3564	16.6122	16.4342
11_GL0006534;11_GL0111646;6-4_GL0014602;Group2-2A_GL0060000;Group2-3A_GL0194212	15.1191	13.7528	14.3966	13.9992	16.1111	16.1492	16.5864	15.8579	16.4024	14.7273	15.5966	15.527	15.9112	16.1334	16.1578	16.1245	16.0749	16.3727	16.3053	15.9383	16.4358	16.412	15.5399	15.7034
11_GL0006534;2-1_GL0010886;2-1_GL0051897	13.3503	12.5534	12.9443	12.5468	15.3582	15.3781	15.3932	14.4734	14.363	13.5788	14.9629	13.3293	15.756	15.2986	13.3991	14.7651	14.8935	14.4978	15.6849	14.1928	15.3528	16.0264	14.2613	14.987
11_GL0006534;2-1_GL0010886;3B-dyr36-06_GL0058943;6-4_GL0014602;Group2-2A_GL0060000;Group2-3A_GL0194212	NA	NA	11.1329	NA	12.6204	12.743	13.4081	12.7746	13.0791	12.0289	12.5367	12.4798	13.6304	12.5704	13.2231	12.8957	12.7428	13.4289	13.1748	12.573	13.5441	13.375	13.037	12.7036
11_GL0006534;5-4_GL0037344	NA	NA	NA	NA	10.7455	11.0409	NA	10.2752	10.2498	NA	NA	NA	10.9714	10.407	10.3242	10.9116	8.78802	NA	10.1099	NA	11.2892	11.7372	NA	10.9752
11_GL0007621	NA	NA	NA	NA	11.4164	NA	NA	NA	NA	NA	NA	NA	10.6168	11.5981	10.437	11.6944	13.0154	NA	NA	NA	11.9988	NA	NA	NA
11_GL0007621;14_GL0090060;4-4_GL0014132;4-7_GL0061305;5-3_GL0108489;6-6_GL0113726;6-7_GL0004908;G1-5A_GL0008588	15.0569	12.9672	15.3981	13.9348	15.7965	15.5797	16.3196	15.6064	15.3849	15.3601	14.4014	14.5849	13.9606	15.797	14.2998	17.0066	15.4737	15.42	14.9865	15.4477	14.4268	15.6918	16.7728	15.7851
11_GL0007621;4-4_GL0014132;4-7_GL0061305;5-3_GL0108489;6-6_GL0113726;6-7_GL0004908;8-3_GL0102003;G1-5A_GL0008588	12.5641	11.8427	11.3188	13.3641	13.5798	13.7799	14.0362	13.4286	13.7114	12.6748	13.2604	10.1761	12.9803	13.6198	12.1228	13.4396	14.2012	13.5397	13.6191	10.933	13.5771	13.3359	12.3307	13.4734
1-1_GL0007779	NA	NA	NA	NA	NA	NA	NA	NA	NA	NA	NA	NA	NA	NA	NA	NA	NA	NA	10.5272	NA	NA	10.6407	NA	NA
1-1_GL0007779;1A-dyr2-07_GL0028330;S-Fe10_GL0165127	14.387	14.7838	15.0384	14.1983	13.6871	13.8736	11.5275	18.3132	12.5659	11.3206	14.6826	11.6546	15.1745	13.8099	14.5183	12.8511	12.6566	11.9448	14.5305	13.5987	13.9281	14.1062	12.4448	NA
1-1_GL0007779;1A-dyr2-07_GL0028330;S-Fe10_GL0165127;S-Fe15_GL0033534	16.5124	18.1083	18.4502	18.4918	17.341	17.438	15.3564	17.2337	16.9924	16.3363	17.7104	NA	16.8248	17.3045	17.4422	16.9173	16.594	16.4642	17.5737	16.7717	16.8954	16.8348	16.3462	15.5565
1-1_GL0007779;S-Fe10_GL0165127	NA	NA	NA	NA	NA	13.6874	12.4499	NA	NA	NA	NA	NA	NA	NA	NA	NA	NA	NA	NA	NA	NA	13.6869	NA	NA
1-1_GL0008052	13.8459	13.2151	13.8457	13.588	12.159	11.2116	NA	NA	NA	NA	13.7523	NA	NA	11.996	12.2254	NA	11.4272	NA	13.9798	12.9721	NA	12.6635	NA	NA
11_GL0008659	NA	11.9564	11.3658	12.8959	12.8876	14.0132	NA	NA	NA	NA	NA	NA	14.1101	12.8471	13.3488	12.5255	NA	NA	13.1619	NA	12.6858	14.0442	NA	NA
11_GL0008659;1A-dyr4-07_GL0102309	NA	12.8196	NA	13.5308	12.9699	14.0285	12.5133	12.4428	12.0878	NA	NA	11.1904	13.6442	13.0253	13.0565	12.7721	10.8777	NA	13.6024	12.4167	12.9756	15.0421	NA	11.0323
11_GL0008659;1A-dyr4-07_GL0102309;2A-dyr16-07_GL0023329;37_GL0042111;47_GL0150000;Group2-8A_GL0209954;MC-6-2_GL0155276	NA	13.3097	NA	14.0017	NA	13.808	NA	NA	NA	NA	NA	NA	14.8382	13.8051	13.7969	NA	NA	NA	12.9183	NA	NA	15.5132	NA	NA
11_GL0008659;1A-dyr4-07_GL0102309;MH-0-3_GL0088997;MH-0-5_GL0091689	NA	NA	NA	NA	12.5329	13.1239	11.5222	NA	NA	NA	NA	NA	13.4584	12.4135	12.8766	NA	NA	NA	13.6298	NA	11.6913	12.9767	NA	NA
1-1_GL0008776	NA	NA	NA	NA	NA	NA	NA	NA	NA	NA	NA	NA	10.868	NA	NA	NA	NA	NA	NA	NA	11.1146	NA	NA	NA
1-1_GL0008776;17_GL0109437;2-1_GL0100041;3-7_GL0048036;4-1_GL0001167;4-1_GL0007100;6-1_GL0062525;G1-1A_GL0012055;G1-8A_GL0025952	14.065	NA	13.3611	NA	14.7559	NA	NA	NA	NA	NA	14.2741	NA	NA	15.03	15.2518	15.1411	14.154	14.6378	NA	NA	NA	15.643	13.654	14.3127
1-1_GL0008776;54_GL0038006	11.7216	11.8962	8.69794	12.14	NA	NA	NA	NA	NA	NA	12.793	NA	NA	NA	NA	12.149	NA	10.6366	NA	11.3064	11.6362	NA	NA	9.98918
1-1_GL0008837	12.834	13.5132	12.5319	13.7337	14.1492	14.0625	14.4617	14.7088	13.8037	12.5656	13.2325	14.5163	13.7165	14.2028	14.4783	14.5674	14.2154	14.4213	13.9799	14.2716	13.4079	15.172	14.5106	14.5968
1-1_GL0008925	12.0996	11.5882	NA	12.9778	13.5074	13.6177	13.4329	14.8303	13.3188	11.9263	13.3769	13.3849	13.4042	13.5671	13.5417	13.1792	13.4433	13.311	13.9583	13.2806	13.4226	11.9883	12.5452	12.7878
11_GL0008962	10.8038	12.0015	10.491	10.5233	12.8054	12.1618	12.9629	11.4096	13.0937	NA	12.4633	11.763	12.3958	12.905	13.8349	12.3161	12.0841	12.5399	12.4705	13.0774	11.9069	NA	12.5825	12.2899
11_GL0008962;4-2_GL0071357;6-5_GL0102019	14.957	13.3977	13.7966	12.7892	15.3741	14.8225	16.4718	14.4934	15.5083	14.5355	15.3266	14.801	15.5517	15.3606	17.5843	15.2112	15.2237	16.2258	15.9541	15.5507	16.143	13.7704	15.7043	15.2776
11_GL0009244;G1-5A_GL0050915;Group2-8A_GL0236582;S-Fe20_GL0098318	NA	11.3025	10.7358	11.608	NA	10.619	11.9946	NA	12.0141	NA	11.7894	NA	11.7734	11.2357	11.364	10.841	11.4637	9.58838	11.7772	11.8015	10.7497	NA	9.92933	11.5925
1-1_GL0009577	13.4928	13.2168	13.6146	13.4497	14.4406	14.5005	13.7563	14.1997	15.038	12.9457	14.1639	15.0257	14.423	14.5408	14.1885	14.003	15.2717	14.3635	15.4277	13.5086	14.7367	14.0252	13.5041	13.6689
1-1_GL0009589	NA	NA	NA	NA	NA	14.0978	NA	NA	13.808	NA	NA	NA	NA	NA	NA	NA	13.5162	13.1469	14.5549	NA	12.5793	NA	NA	NA
1-1_GL0009612	11.1192	14.8037	16.3453	12.3528	13.448	16.304	NA	15.1711	15.9941	15.2294	13.7323	NA	12.4026	13.5812	12.2791	NA	17.1085	15.4878	15.0485	11.5138	12.8108	13.5509	NA	12.6044
11_GL0009802	NA	15.2866	NA	16.3187	NA	15.2515	NA	15.5092	NA	NA	NA	NA	NA	NA	NA	13.9096	NA	NA	14.7168	NA	NA	15.4552	NA	NA
1-1_GL0009843	12.9616	12.1273	11.7825	12.0953	14.3695	14.2404	15.3285	14.6853	13.332	11.4455	13.356	13.3452	14.662	14.3893	14.441	13.4143	13.4935	14.0729	13.8728	13.9341	14.593	14.1831	13.5163	13.1304
1-1_GL0009843;1-1_GL0050864;1-2_GL0047570;11_GL0132807;2-1_GL0058178;5-8_GL0094007;S-Fe20_GL0135464;S-Fe20_GL0145970	16.5727	14.6537	15.0685	14.7772	17.2599	16.2278	17.9556	16.8022	16.6349	15.0208	16.2975	15.6842	17.8649	16.7232	18.1066	15.1923	15.7444	16.2965	17.5068	16.4635	17.3805	16.9705	15.4155	14.3591
1-1_GL0009843;1-1_GL0103727	13.1819	15.6339	13.0089	15.7304	15.5029	15.1179	13.7384	14.3857	13.9374	15.0978	12.7661	14.5611	15.1987	15.5076	15.7564	15.0343	13.9484	14.6314	12.5325	13.6353	15.5045	15.119	14.7127	14.2448
1-1_GL0009843;2-1_GL0058178;2A-dyr16-06_GL0021101;3-5_GL0107671;4-3_GL0038994;6-1_GL0039873;6-3_GL0056201;6-4_GL0027646;G1-5A_GL0031161;Group2-4A_GL0005933;S-Fe2_GL0174696;S-Fe8_GL0076667;S-Fe9_GL0037037	13.9165	13.8605	NA	14.1249	15.1888	15.0176	16.8775	NA	NA	NA	14.9384	NA	NA	15.528	15.8841	15.0846	14.0106	NA	15.3029	15.2075	NA	15.4128	NA	14.4844
1-1_GL0009843;2A-dyr16-06_GL0021101;4-3_GL0038994;5-4_GL0118669;6-1_GL0039873;6-3_GL0056201;6-4_GL0027646;6-6_GL0112695;8-4_GL0005749;G1-5A_GL0031161;Group2-4A_GL0005933;S-Fe8_GL0076667;S-Fe9_GL0037037	13.4193	12.787	12.0255	12.6956	15.5986	14.8097	16.5868	14.4133	15.2289	13.0643	14.6181	14.1018	15.76	15.3335	16.0892	14.196	14.9183	15.1402	15.7084	15.1259	14.9257	15.0528	14.9437	14.7898
1-1_GL0009843;2A-dyr16-06_GL0021101;4-3_GL0038994;5-4_GL0118669;6-1_GL0039873;6-3_GL0056201;6-4_GL0027646;8-4_GL0005749;G1-5A_GL0031161;Group2-4A_GL0005933;S-Fe8_GL0076667	14.5987	14.8596	14.5059	15.0872	17.1148	16.5472	17.3123	16.568	16.942	15.2166	16.4733	16.6807	17.0575	17.3268	16.9653	15.8279	16.8967	16.7589	17.3021	16.4679	16.7886	16.7423	16.4208	16.3362
1-1_GL0009843;2A-dyr16-06_GL0021101;4-3_GL0038994;5-4_GL0118669;6-1_GL0039873;6-3_GL0056201;6-4_GL0027646;8-4_GL0005749;G1-5A_GL0031161;Group2-4A_GL0005933;S-Fe8_GL0076667;S-Fe9_GL0037037	NA	NA	NA	NA	12.9967	NA	NA	NA	NA	NA	NA	NA	NA	13.0748	13.725	NA	NA	NA	NA	NA	NA	NA	NA	NA
1-1_GL0009843;6-1_GL0039873;6-3_GL0056201;8-4_GL0019066;G1-5A_GL0031161;Group2-8A_GL0235603;S-Fe8_GL0076667	NA	NA	NA	8.63352	10.5716	NA	10.9316	8.89066	10.6247	NA	NA	NA	11.6362	10.1975	9.12359	NA	10.5906	10.4742	11.1942	NA	11.4885	NA	NA	NA
1-1_GL0009843;6-6_GL0112695	13.3784	NA	11.3536	10.4929	13.5197	13.1872	15.6129	13.4386	11.6151	NA	13.5197	NA	14.0878	13.5612	13.8983	13.2486	13.1341	13.0384	14.2698	14.138	12.9654	13.1701	12.0302	12.2835
1-1_GL0010110	11.2695	NA	11.5655	NA	NA	NA	NA	NA	NA	NA	NA	NA	NA	NA	NA	NA	NA	NA	NA	NA	NA	NA	NA	NA
1-1_GL0010110;11_GL0002095;40_GL0047200	NA	NA	NA	NA	NA	12.9747	NA	NA	NA	NA	NA	NA	NA	NA	NA	NA	NA	NA	NA	NA	13.0655	13.4011	NA	NA
1-1_GL0010110;1-1_GL0011358;11_GL0002095;14_GL0090199;40_GL0047200;MC-6-2_GL0150055;S-Fe10_GL0134058;S-Fe11_GL0043926	15.3816	16.3945	15.9653	17.0412	15.6455	15.8913	13.8284	14.2594	15.393	14.0252	15.5695	13.4743	16.8741	15.5702	16.5588	13.826	14.2718	13.8619	16.8709	14.8275	15.8719	17.0449	14.2413	12.3313
1-1_GL0010110;1-1_GL0011358;1-1_GL0091513;1-6_GL0017811;1-8_GL0006211;11_GL0002095;11_GL0028376;11_GL0108772;1A-dyr2-07_GL0066529;1A-dyr4-07_GL0005233;1B-dyr12-07_GL0023314;2-2_GL0114153;2-3_GL0002598;2-4_GL0043441;20_GL0034432;28_GL0023200;3-5_GL0005950;3-5_GL0037612;35_GL0130831;37_GL0016532;37_GL0064322;40_GL0047200;5-6_GL0012253;6-3_GL0073361;6-5_GL0072187;7-8_GL0106456;8-5_GL0086787;G1-5A_GL…	17.9449	17.5375	NA	17.7166	18.5966	18.2191	18.2441	NA	18.0151	16.653	18.8121	NA	18.991	18.4546	19.3638	16.9243	17.9619	16.8312	19.5286	18.7	17.396	20.0562	22.2981	16.6042
1-1_GL0010110;1-1_GL0011358;1-1_GL0091513;1B-dyr12-07_GL0023314;37_GL0016532;40_GL0047200;MC-0-1_GL0022870;MH-0-3_GL0068860;S-Fe10_GL0056937;S-Fe10_GL0134058;S-Fe10_GL0143701;S-Fe12_GL0013137	15.3154	16.7643	17.4735	16.855	15.4405	15.4298	12.4026	14.8762	14.537	13.2292	15.3955	13.8422	16.5176	14.9772	16.5899	13.8182	14.4776	13.5779	15.5987	14.9979	15.8015	16.7162	13.7775	12.1798
1-1_GL0010110;1-1_GL0011358;40_GL0047200	13.1522	13.9275	15.4449	13.986	13.0449	13.3137	11.1462	12.0999	14.0088	12.3147	14.4074	12.3216	12.4259	13.1373	14.1076	11.7526	13.0204	NA	13.9894	12.6219	13.4317	13.5309	13.7827	NA
1-1_GL0010110;37_GL0016532;40_GL0047200;6-5_GL0008930;MC-0-1_GL0022870;MH-0-3_GL0068860;S-Fe10_GL0099296	10.5447	12.5762	NA	12.8332	12.6209	14.2419	NA	13.814	10.862	NA	NA	NA	13.9303	12.5083	14.3961	NA	13.2218	NA	14.9014	NA	14.1669	13.7136	11.1892	10.3019
1-1_GL0010110;40_GL0047200	13.3335	14.4652	13.6463	14.5762	12.6237	13.0143	10.919	13.1781	13.0454	11.4238	13.6244	12.073	13.3869	12.585	14.173	11.572	13.025	11.1899	14.5233	13.0487	13.2289	14.5103	13.285	NA
1-1_GL0010110;MC-0-1_GL0022870;MH-0-3_GL0068860	NA	11.3619	11.6892	11.8316	11.0756	10.5259	NA	NA	NA	NA	NA	NA	12.2504	11.5045	12.0725	NA	10.6943	NA	12.0658	NA	11.8383	11.6144	11.2248	NA
11_GL0010402	11.0968	NA	15.7593	14.6323	16.0687	16.1083	17.1332	16.6208	11.6202	NA	11.2867	NA	15.0439	16.4457	15.336	17.975	15.4288	15.0496	13.909	14.914	15.9432	16.437	17.9802	15.9786
11_GL0010402;11_GL0053374;1A-dyr4-07_GL0028776;1A-dyr4-07_GL0053873;3-7_GL0067223;4-2_GL0084916;6-3_GL0057956;6-5_GL0061757	NA	12.7319	12.5478	12.5811	14.3055	NA	13.8208	13.9295	13.6417	13.2474	14.0417	NA	14.8894	14.3824	14.1458	14.6423	13.9323	NA	13.8719	NA	14.0988	15.0797	14.6086	13.7059
11_GL0010402;1A-dyr4-07_GL0053873;3-7_GL0067223;4-7_GL0095119;8_GL0038333;Group2-7A_GL0057465;S-Fe2_GL0192770	NA	NA	11.8963	NA	12.6681	NA	NA	12.882	12.5114	NA	NA	NA	12.1829	12.5867	12.4203	12.6939	12.9694	NA	NA	NA	12.0927	NA	12.9489	NA
11_GL0010402;4-7_GL0095119;6-7_GL0120327	14.0062	NA	NA	NA	17.7238	17.2065	16.6182	17.082	13.9092	13.8789	13.9604	13.5247	16.3216	17.7012	16.9031	16.9507	15.8093	16.4266	16.4311	15.8986	16.4461	17.6983	17.7546	15.6092
11_GL0010649	11.094	NA	14.0967	NA	14.5836	15.726	16.5545	15.6157	NA	NA	NA	NA	12.5991	14.9579	11.7947	16.1856	NA	14.2487	13.2625	14.0647	13.9286	11.9603	15.8748	NA
11_GL0010649;11_GL0153043	12.792	NA	12.9208	13.4727	14.9701	14.2688	15.137	13.0197	NA	NA	12.6229	NA	12.9152	15.0265	12.214	14.7948	13.2682	12.888	13.3272	13.0162	14.1	13.2279	13.3406	11.9589
11_GL0010649;11_GL0153043;5-8_GL0118237;S-Fe7_GL0297624	13.0436	12.4576	14.135	13.7289	15.5075	15.395	15.506	15.1576	13.4749	12.0782	13.2869	12.7192	14.6728	15.5712	14.9545	15.5182	14.4149	14.5013	15.1051	13.9882	15.7817	15.512	15.535	13.4166
11_GL0010649;17_GL0083320;1A-dyr4-07_GL0106169;5-8_GL0118237	NA	NA	13.2469	NA	14.1393	13.9484	14.855	NA	13.625	NA	NA	NA	NA	14.5308	13.6351	15.2381	12.8139	13.707	13.2338	13.3745	16.1954	NA	14.6215	14.0257
11_GL0010649;5-8_GL0118237;Group2-3A_GL0021448;S-Fe7_GL0297624	NA	NA	9.45095	NA	10.0252	NA	10.8657	10.2286	NA	NA	NA	NA	NA	9.59714	NA	10.9272	9.49966	NA	NA	NA	8.98955	NA	11.0728	8.51873
11_GL0010649;5-8_GL0118237;S-Fe7_GL0297624	NA	NA	14.3165	12.7148	14.5965	13.9561	15.2664	14.4906	10.7529	NA	NA	11.8924	13.2931	14.3545	13.9618	16.0945	11.0261	14.067	13.0787	13.4533	13.6228	14.5254	15.2548	13.3047
11_GL0010649;S-Fe7_GL0297624	NA	12.6203	14.7724	12.6246	14.9048	15.1442	16.2066	15.8131	12.21	NA	NA	13.6968	14.369	15.0343	14.236	17.2286	14.7101	14.9214	14.1484	14.8389	15.1774	13.527	16.2478	14.3139
11_GL0010650	NA	10.8599	15.4477	14.7934	16.4688	16.732	17.4816	16.1066	11.1324	11.2294	10.3975	NA	15.0518	16.6757	15.9029	17.632	15.3307	15.5573	14.1185	14.773	16.1671	16.0798	16.948	14.3322
11_GL0010650;2-4_GL0102869;5-7_GL0067986;S-Fe2_GL0121794	NA	9.84361	10.9947	NA	14.2051	NA	12.9418	12.1039	12.4875	NA	12.6675	12.5642	13.8609	13.9551	13.4468	12.4642	12.8288	12.4335	13.6282	NA	12.8605	12.6835	11.8887	13.387
11_GL0010650;52_GL0025897	NA	NA	12.8269	NA	13.0567	13.8968	14.0074	13.7629	NA	NA	NA	NA	13.6201	13.1026	13.5013	14.4087	11.2765	12.7832	13.107	11.581	14.0404	14.2031	13.2838	NA
11_GL0010650;5-7_GL0067986	NA	NA	12.2891	NA	11.9842	13.0976	13.1692	12.675	NA	NA	NA	NA	NA	11.9837	10.9607	13.9622	NA	NA	NA	NA	11.7557	NA	13.4922	NA
11_GL0010650;5-7_GL0067986;52_GL0025897;S-Fe2_GL0121794	NA	13.5336	14.0551	14.527	15.6608	14.7694	15.6374	15.351	14.4558	NA	NA	14.3466	15.3055	15.8677	15.0515	15.6939	15.0864	15.2363	14.9565	15.0778	15.8031	14.8504	15.3277	14.2841
1-1_GL0011263	NA	NA	NA	NA	NA	NA	NA	NA	NA	NA	NA	NA	NA	NA	NA	NA	15.4798	12.9248	NA	NA	NA	NA	14.1003	NA
1-1_GL0011263;1-1_GL0108993;11_GL0121982;1A-dyr2-07_GL0034958;1A-dyr2-07_GL0064584;1A-dyr3-06_GL0017534;1A-dyr5-06_GL0013898;1_GL0014036;2-1_GL0015271;2-1_GL0076259;2-1_GL0084165;2-2_GL0054939;2-2_GL0079900;2-3_GL0014793;26_GL0143043;29_GL0023124;2A-dyr14-06_GL0036622;34_GL0079617;37_GL0018308;5-1_GL0049746;5-2_GL0064268;6-2_GL0091659;6-3_GL0002724;6-3_GL0118595;7-3_GL0070741;7-5_GL0063140;7-7_GL…	NA	NA	NA	NA	NA	NA	NA	18.8719	NA	NA	NA	16.863	19.2608	NA	NA	NA	NA	NA	NA	NA	18.3628	NA	16.2242	NA
1-1_GL0011263;1-1_GL0108993;1A-dyr2-07_GL0064584;1A-dyr5-06_GL0013898;2-1_GL0015271;2-1_GL0076259;2-1_GL0084165;2-2_GL0054939;2-2_GL0079900;2-2_GL0129080;2-3_GL0014793;26_GL0143043;29_GL0023124;2A-dyr14-06_GL0036622;34_GL0079617;5-1_GL0049746;5-2_GL0064268;6-2_GL0091659;6-3_GL0002724;6-3_GL0118595;7-3_GL0070741;7-5_GL0063140;7-7_GL0107699;8-3_GL0125327;8-5_GL0030763;G1-3A_GL0067553;G1-5A_GL019849…	19.2899	17.66	17.7655	17.7193	19.836	20.4766	20.048	19.8375	20.1267	18.1102	19.5771	19.8163	20.4737	19.903	20.0704	19.1199	19.1803	19.888	20.1576	20.0253	20.2871	19.7286	18.7138	18.4668
1-1_GL0011263;1-1_GL0108993;1A-dyr2-07_GL0064584;1A-dyr5-06_GL0013898;2-1_GL0015271;2-1_GL0076259;2-1_GL0084165;2-2_GL0054939;2-2_GL0079900;2-3_GL0014793;20_GL0010443;22_GL0050998;26_GL0143043;29_GL0023124;2A-dyr14-06_GL0036622;34_GL0079617;5-1_GL0049746;5-2_GL0064268;6-2_GL0091659;6-3_GL0002724;6-3_GL0118595;7-3_GL0070741;7-5_GL0044338;7-5_GL0063140;7-7_GL0107699;8-1_GL0126821;8-3_GL0125327;8-5_…	16.1665	15.316	14.4519	15.7338	16.9999	16.9648	17.3117	16.9531	17.3697	15.1664	16.6342	16.6797	16.8382	17.1442	16.7685	16.2785	16.2476	17.2587	16.7009	16.7889	17.4234	16.3938	16.4589	16.502
1-1_GL0011263;1-1_GL0108993;1A-dyr2-07_GL0064584;1A-dyr5-06_GL0013898;2-1_GL0015271;2-1_GL0076259;2-2_GL0054939;2-2_GL0079900;2-3_GL0014793;20_GL0010443;26_GL0143043;29_GL0023124;2A-dyr14-06_GL0036622;34_GL0079617;5-1_GL0049746;5-2_GL0064268;6-2_GL0091659;6-3_GL0118595;7-3_GL0070741;7-5_GL0063140;7-7_GL0107699;8-1_GL0126821;8-3_GL0125327;8-5_GL0030763;G1-3A_GL0067553;G1-5A_GL0198494;Group2-4A_GL0…	NA	NA	NA	NA	NA	NA	NA	16.6934	NA	NA	NA	16.3556	NA	NA	NA	NA	NA	NA	NA	NA	13.5259	NA	NA	NA
1-1_GL0011263;1-1_GL0108993;1A-dyr2-07_GL0064584;2A-dyr14-06_GL0036622;34_GL0079617;G1-3A_GL0067553	NA	NA	NA	NA	NA	NA	NA	NA	NA	15.5761	NA	NA	NA	NA	NA	15.2781	16.2463	NA	NA	NA	NA	NA	NA	NA
1-1_GL0011263;1-1_GL0108993;2-1_GL0076259;2-2_GL0054939;2-2_GL0079900;26_GL0143043;29_GL0023124;34_GL0079617;5-1_GL0049746;7-7_GL0107699;8-1_GL0126821;G1-3A_GL0067553;G1-5A_GL0198494	12.0222	13.127	11.5223	13.0068	14.8811	14.0352	13.6864	13.0836	13.5609	11.6141	13.8691	13.0378	14.5227	15.1415	11.9007	12.8301	13.9294	12.7404	14.3633	13.5815	14.53	13.1814	12.6391	12.4251
1-1_GL0011263;1-1_GL0108993;2-2_GL0054939;2-2_GL0079900;29_GL0023124;34_GL0079617;5-1_GL0049746;7-7_GL0107699;8-1_GL0126821;G1-3A_GL0067553;G1-5A_GL0198494	10.9543	NA	10.5874	13.3876	15.0244	15.4034	13.3147	13.9476	12.7915	10.078	13.1128	NA	14.8921	15.1423	11.9683	12.5514	14.2045	13.5209	15.3976	13.5402	14.6494	14.1958	12.3487	12.4197
1-1_GL0011263;11_GL0121982;1A-dyr2-07_GL0034958;1A-dyr2-07_GL0064584;1A-dyr3-06_GL0017534;1_GL0014036;2-1_GL0076259;2-1_GL0084165;20_GL0010443;22_GL0050998;26_GL0143043;2A-dyr14-06_GL0036622;37_GL0018308;6-2_GL0091659;6-3_GL0002724;7-5_GL0044338;7-5_GL0063140;S-Fe10_GL0021310	18.3559	17.7442	17.7283	17.4697	19.0379	19.5024	19.7278	19.6374	19.3408	18.4412	19.0269	18.7858	18.1962	19.0481	18.9618	19.5866	19.0405	18.9306	18.3067	18.6144	18.8537	19.4495	18.9137	18.6954
1-1_GL0011263;2-2_GL0054939;2-2_GL0079900;20_GL0010443;29_GL0023124;5-1_GL0049746;7-7_GL0107699;8-3_GL0125327;G1-5A_GL0198494	15.9859	16.813	15.8022	16.7019	18.5266	18.7824	17.1692	18.8023	16.6917	16.2044	16.8764	16.5683	18.1807	18.4993	17.8423	17.752	17.338	17.895	18.5677	17.3501	18.1688	18.6281	17.6039	17.017
1-1_GL0011263;2-2_GL0054939;2-2_GL0079900;2-3_GL0014793;29_GL0023124;5-1_GL0049746;7-7_GL0107699;8-3_GL0125327;G1-5A_GL0198494	NA	15.1393	NA	15.534	18.1689	18.3713	17.7744	17.5565	17.0777	NA	17.0668	17.2463	17.738	18.2737	18.3385	16.544	11.5676	17.4204	17.5107	17.6259	17.614	16.6609	16.5772	15.9983
1-1_GL0011263;2-2_GL0054939;2-2_GL0079900;29_GL0023124;5-1_GL0049746;7-7_GL0107699;8-3_GL0125327;G1-5A_GL0198494	NA	NA	NA	NA	NA	NA	13.8124	14.6957	NA	NA	NA	13.1048	14.8871	NA	NA	NA	NA	NA	NA	NA	14.17	NA	NA	NA
1-1_GL0011263;2-2_GL0079900;2A-dyr14-06_GL0036622;5-1_GL0049746;7-7_GL0107699;G1-5A_GL0198494	11.2957	11.2483	NA	11.8578	14.2917	13.6195	14.282	13.2919	14.1695	11.9495	13.2546	13.1961	14.695	14.2736	12.0392	12.2579	14.5243	13.5157	14.6733	12.9656	13.8515	13.3457	13.8987	13.2046
1-1_GL0011263;6-2_GL0091659	NA	NA	NA	NA	NA	NA	NA	NA	NA	12.0351	NA	12.2884	14.3234	NA	NA	13.4789	14.4676	12.9543	14.9093	13.6737	NA	NA	13.9804	NA
11_GL0011325	NA	NA	NA	NA	NA	NA	NA	10.8287	NA	NA	NA	NA	12.7445	NA	NA	NA	NA	NA	NA	NA	NA	NA	NA	NA
1-1_GL0011358	13.1572	13.6192	12.2178	14.2603	12.7654	11.86	NA	12.6068	NA	NA	11.8848	11.4007	14.0721	12.7723	13.0187	NA	13.3091	NA	NA	NA	13.0775	13.4471	11.9776	NA
1-1_GL0011358;1-1_GL0091513;11_GL0002095;1B-dyr12-07_GL0023314;28_GL0023200;37_GL0016532;MC-0-1_GL0022870;MC-6-3_GL0041016;MH-0-3_GL0068860;S-Fe10_GL0099296;S-Fe10_GL0143701;S-Fe12_GL0013137;S-Fe13_GL0093499	16.7838	17.6389	16.9784	17.776	16.5861	15.5471	14.4005	14.8052	16.0385	14.5696	17.4347	14.8336	18.8398	16.7081	16.9133	NA	14.3889	14.0648	17.388	16.0389	16.837	17.4362	15.7746	NA
1-1_GL0011358;1-1_GL0091513;1B-dyr12-07_GL0023314;MC-6-3_GL0041016;S-Fe10_GL0143701;S-Fe12_GL0013137;S-Fe13_GL0093499	NA	NA	NA	NA	NA	NA	NA	14.0729	NA	NA	NA	NA	NA	NA	NA	NA	NA	NA	NA	NA	NA	NA	NA	NA
1-1_GL0011358;37_GL0016532;4-1_GL0044489;MC-0-1_GL0022870;MH-0-3_GL0068860;S-Fe10_GL0099296	13.7551	15.7724	15.0147	15.3	13.8855	14.5494	12.1384	NA	13.4541	12.5262	15.3115	13.5343	15.3426	14.1515	14.3675	11.8673	14.3619	12.9486	15.325	13.8068	16.0002	16.0872	12.7425	10.3073
1-1_GL0011358;37_GL0016532;S-Fe10_GL0134058	13.5467	14.2458	NA	14.3614	NA	14.1817	NA	NA	NA	NA	14.047	NA	NA	NA	14.6065	NA	12.4376	NA	13.7268	14.2987	14.8735	15.7309	NA	NA
1-1_GL0011409;1-1_GL0097718;1-1_GL0125183;1-3_GL0027415;14_GL0041674;2A-dyr16-07_GL0072563;3-6_GL0008151;5-8_GL0010434;52_GL0005030;7-5_GL0036750;MC-0-1_GL0027857;MH-6-1_GL0086685;MH-6-3_GL0157415;S-Fe20_GL0191821	13.6716	14.1968	14.3355	14.5318	15.8956	15.4868	14.7338	14.7903	14.6718	NA	NA	NA	NA	15.8835	15.1879	13.9941	13.7367	NA	16.237	14.5833	NA	17.0333	NA	12.513
1-1_GL0011409;1-1_GL0097718;1-1_GL0125183;1-3_GL0027415;52_GL0005030;MC-0-1_GL0027857;MH-6-1_GL0086685;MH-6-3_GL0157415	12.2752	NA	NA	11.6426	13.831	12.0142	13.6569	NA	12.1244	NA	12.6474	11.5966	15.4087	13.8519	14.2624	11.5057	11.6647	11.1605	14.3266	11.8714	14.4974	14.3736	NA	NA
11_GL0011607;S-Fe20_GL0084968	NA	NA	NA	NA	NA	13.3287	NA	NA	NA	NA	NA	NA	NA	NA	11.9163	NA	NA	NA	NA	NA	NA	13.5477	NA	NA
1-1_GL0011767	NA	NA	NA	NA	11.9682	NA	NA	NA	11.6987	NA	12.6051	12.0085	12.4144	11.8641	12.5516	NA	13.1538	13.9084	13.3332	13.3719	12.5536	NA	NA	NA
1-1_GL0012052	13.2812	NA	12.4209	NA	14.6956	12.3522	13.3693	11.7687	13.9834	15.1681	11.6229	15.5607	14.3357	14.8399	16.2398	NA	14.5722	16.8902	13.806	15.4997	15.2201	NA	16.0342	14.3642
1-1_GL0012145;11_GL0034911	NA	NA	NA	NA	NA	NA	NA	NA	NA	NA	NA	NA	NA	NA	NA	NA	17.6598	14.4365	NA	NA	NA	NA	15.3169	NA
1-1_GL0012145;11_GL0034911;3-5_GL0085079;G1-5A_GL0200115	NA	NA	NA	10.6157	NA	11.029	10.5378	11.966	13.2757	NA	NA	NA	13.5425	NA	11.2653	13.9417	13.9508	11.5424	13.5679	NA	13.8099	12.985	12.6071	NA
11_GL0012274	NA	NA	NA	NA	11.2994	13.1132	NA	NA	NA	NA	NA	NA	12.1742	NA	12.07	NA	NA	NA	NA	NA	12.3145	NA	NA	NA
11_GL0012274;2-5_GL0019211;4-7_GL0137209;5-7_GL0003557;5-8_GL0143660;Group2-2A_GL0051349;Group2-7A_GL0006144;Group2-8A_GL0132537;MC-6-2_GL0028893;S-Fe2_GL0188224	15.3061	15.9703	16.3008	16.3048	17.7235	17.1712	17.4112	17.8138	16.5202	15.3617	15.979	15.8584	17.6659	17.4659	18.2498	17.2178	16.4881	16.5716	17.8311	16.1326	16.916	16.9703	16.4113	15.7743
11_GL0012274;2-5_GL0019211;4-7_GL0137209;5-7_GL0003557;5-8_GL0143660;Group2-3A_GL0095108;Group2-8A_GL0076108;Group2-8A_GL0132537;MC-6-2_GL0028893;S-Fe2_GL0188224;S-Fe7_GL0290151	12.205	13.1449	12.4679	13.5958	14.4723	14.1648	14.5539	13.502	13.0291	10.8026	13.313	12.47	14.8008	14.3696	12.4116	13.6706	13.6205	12.5923	15.2607	12.7111	14.3786	13.6973	12.683	13.266
11_GL0012274;2-5_GL0019211;4-7_GL0137209;5-7_GL0003557;Group2-3A_GL0095108;Group2-8A_GL0076108;Group2-8A_GL0132537;MC-6-2_GL0028893;S-Fe2_GL0188224	14.6501	15.6438	15.5067	16.2281	16.4841	16.9142	16.0984	16.7466	16.3197	16.4562	16.0244	15.8884	17.4511	16.365	17.0545	16.6473	16.0027	16.2032	17.4619	15.9163	15.7676	15.7164	15.5085	16.4463
11_GL0012274;Group2-2A_GL0051349	NA	NA	NA	NA	NA	NA	NA	NA	NA	NA	NA	NA	14.0124	NA	NA	NA	NA	NA	NA	NA	13.2885	NA	12.6627	NA
1-1_GL0013126	14.9605	11.8153	12.459	12.4752	14.8044	13.9845	15.2697	13.3274	12.6903	NA	14.3765	13.2133	14.4371	15.2906	15.0344	13.6987	13.6133	13.4438	14.2296	14.6943	14.1433	13.0638	12.8241	13.3091
1-1_GL0013126;11_GL0136326;11_GL0139332;2-7_GL0009163;4-1_GL0001158;4-5_GL0097286;4-7_GL0146229;6-6_GL0094383;8-2_GL0133656;G1-1A_GL0005457;G1-3A_GL0030227;MC-6-1_GL0053362;MC-6-2_GL0185758;S-Fe2_GL0142646	NA	NA	13.5112	12.5668	NA	NA	NA	13.4225	12.8041	NA	NA	13.8336	14.3752	13.9435	14.3325	13.4636	NA	NA	NA	NA	14.6124	NA	13.2756	12.2902
1-1_GL0013126;11_GL0139332;4-5_GL0097286;4-7_GL0146229;8-2_GL0133656;G1-3A_GL0030227;S-Fe2_GL0142646	16.092	13.0677	13.866	13.9252	15.3279	14.6869	15.9217	14.7122	14.2864	12.8731	15.3616	14.1395	15.2502	15.3939	15.8194	13.8665	14.5303	13.8726	15.9761	15.6341	15.8996	15.2402	13.9969	14.3106
1-1_GL0013126;1-2_GL0082674;11_GL0136326;2-7_GL0009163;4-1_GL0001158;4-8_GL0033457;40_GL0026669;5-1_GL0073772;6-6_GL0094383;G1-1A_GL0005457;G1-3A_GL0030227;Group2-2A_GL0032631;MC-6-1_GL0053362	NA	NA	NA	NA	NA	NA	NA	NA	NA	NA	NA	NA	NA	NA	NA	NA	NA	NA	NA	NA	NA	12.4116	NA	NA
1-1_GL0013126;1-2_GL0082674;11_GL0136326;2-7_GL0009163;4-1_GL0001158;4-8_GL0033457;40_GL0026669;6-6_GL0094383;G1-3A_GL0030227;Group2-2A_GL0032631;MC-6-1_GL0053362	16.8249	15.2775	15.6219	15.6392	17.6196	16.7999	17.222	15.7361	16.5291	15.2321	16.5761	16.6096	17.4297	17.6256	17.8925	16.8747	16.3591	16.45	17.3593	17.2548	17.365	16.2152	15.4168	15.7901
1-1_GL0013126;1-2_GL0082674;11_GL0136326;G1-3A_GL0030227	NA	NA	9.53907	9.95871	12.2126	10.4838	11.9222	NA	10.1308	NA	NA	NA	11.7209	11.897	12.2943	10.5823	10.828	NA	11.0501	NA	11.7905	10.9048	10.2934	NA
1-1_GL0013126;1-2_GL0082674;2-7_GL0009163;4-1_GL0001158;4-8_GL0033457;40_GL0026669;5-1_GL0073772;6-6_GL0094383;G1-1A_GL0005457;G1-3A_GL0030227;Group2-2A_GL0032631;MC-6-1_GL0053362	NA	NA	NA	NA	NA	14.3622	14.7494	14.2219	14.2715	NA	NA	14.2369	15.5279	NA	NA	NA	NA	NA	15.7159	NA	14.5655	13.9061	13.592	NA
1-1_GL0013126;G1-3A_GL0030227	16.8408	13.6475	14.3168	13.3965	16.6313	15.09	16.8778	14.5721	15.2034	13.8083	15.9598	15.8075	16.4681	16.6686	17.3492	15.834	15.2048	15.2158	16.2951	17.0888	16.3113	14.334	14.1914	15.335
1-1_GL0013371	14.617	14.3624	13.4103	13.5812	NA	12.866	11.0923	11.8347	NA	NA	13.1032	NA	NA	NA	NA	NA	13.9609	NA	14.0551	10.5361	NA	NA	13.1154	NA
1-1_GL0013371;MC-6-1_GL0049868;S-Fe10_GL0064312	16.265	17.1973	16.8215	15.6485	14.0933	15.2969	14.5436	14.3271	13.2755	12.2819	15.9418	13.284	13.2319	14.5687	14.7488	NA	16.2407	13.5044	16.294	13.8939	14.1392	NA	15.0574	12.2414
1-1_GL0013372;1-1_GL0082194;1-1_GL0095242;19_GL0086251;40_GL0038719;S-Fe19_GL0084219	13.2719	14.2322	15.6369	14.2924	13.0723	12.5059	NA	12.8074	12.7418	NA	14.3307	11.812	13.4301	12.4292	13.7394	12.2049	13.3994	NA	14.3846	NA	12.5549	13.2593	13.9379	NA
1-1_GL0013372;1-1_GL0095242;1-1_GL0116050;19_GL0086251;40_GL0038719;S-Fe10_GL0170082;S-Fe19_GL0084219	15.1425	NA	NA	NA	13.9358	13.8767	NA	14.1644	NA	NA	NA	12.9596	14.2003	13.9137	14.8085	NA	14.7459	NA	14.8219	NA	13.9767	15.0757	15.4035	NA
1-1_GL0013372;19_GL0086251;40_GL0038719;S-Fe10_GL0170082	NA	13.1333	12.3541	NA	11.6132	NA	NA	NA	NA	NA	NA	NA	NA	NA	12.2213	NA	12.1419	NA	NA	NA	NA	NA	NA	NA
1-1_GL0013372;40_GL0038719	NA	13.1834	12.7696	12.9897	NA	NA	NA	12.5152	12.3981	NA	NA	11.8509	NA	NA	NA	NA	13.4143	NA	NA	NA	12.2701	NA	13.16	NA
1-1_GL0013372;40_GL0038719;S-Fe19_GL0084219	NA	NA	NA	NA	NA	NA	NA	15.3858	15.3326	NA	NA	14.3478	15.6673	NA	NA	NA	NA	NA	NA	NA	14.87	NA	NA	NA
11_GL0013664	15.4365	15.1553	13.7899	13.5728	NA	NA	12.9021	14.327	NA	NA	14.7209	14.9393	13.7155	NA	NA	NA	13.1397	12.8143	13.9427	13.6361	13.7286	13.5124	13.6944	NA
11_GL0014135;11_GL0025982;1A-dyr2-07_GL0027016;1A-dyr2-07_GL0039772;1A-dyr4-07_GL0045601;1A-dyr4-07_GL0110967;2-2_GL0043407;3-7_GL0070473;4-7_GL0087480;5-4_GL0026565;6-1_GL0068351;6-6_GL0074506;8-1_GL0006910;8-3_GL0022294;G1-1A_GL0008874;Group2-1A_GL0028415;Group2-2A_GL0084879;Group2-8A_GL0206293;S-Fe17_GL0015509;S-Fe9_GL0171725	NA	NA	NA	NA	NA	NA	NA	16.83	16.7428	NA	NA	16.2771	17.9822	NA	NA	NA	NA	NA	NA	NA	17.3992	NA	16.4933	NA
11_GL0014135;1A-dyr4-07_GL0045601;6-6_GL0074506;Group2-8A_GL0206293	12.435	13.0455	12.4036	13.9945	14.2507	15.0413	14.2457	13.9863	14.0074	13.2218	14.0535	NA	15.738	14.6273	15.2811	13.4421	14.2763	13.7987	14.3679	13.975	13.7968	14.7028	14.2636	13.8408
11_GL0014135;6-6_GL0074506	NA	10.8918	NA	10.9187	11.5691	13.6275	12.6198	12.0383	NA	NA	NA	11.3104	12.8861	11.5848	12.3865	11.4954	10.1461	11.9879	12.3655	12.6932	13.3432	13.5019	12.8882	NA
1-1_GL0014250;1-1_GL0095657;1-2_GL0125028	13.4764	13.7833	14.5904	13.8505	13.9477	14.0837	NA	13.3353	13.7614	12.7491	13.8739	13.0751	14.3763	13.7772	12.9657	14.6501	16.2285	14.9515	15.9597	13.7672	15.4941	NA	12.5782	14.5641
1-1_GL0014250;1-2_GL0125028	15.7241	14.9211	12.3875	15.8355	NA	NA	NA	NA	NA	NA	NA	12.698	NA	NA	14.8907	16.5464	NA	15.8918	NA	14.7646	15.3857	14.422	NA	NA
1-1_GL0014587;MC-6-2_GL0114686;S-Fe10_GL0072587;S-Fe10_GL0091615;S-Fe10_GL0150402	NA	NA	NA	NA	NA	12.5571	NA	NA	12.4789	NA	NA	NA	14.1848	13.5076	NA	NA	NA	NA	NA	NA	14.1185	14.5723	NA	NA
1-1_GL0014587;S-Fe10_GL0091615	13.8348	16.3844	15.8762	16.5603	14.1356	14.7608	NA	NA	NA	NA	14.5607	13.5334	17.4988	14.3544	15.4707	NA	12.7111	NA	16.7087	13.8168	15.8259	16.727	NA	NA
1-1_GL0014825	17.7459	NA	17.2641	16.7151	18.593	16.5877	18.6345	17.4985	18.6995	17.7915	18.2025	19.2412	18.3686	18.7464	18.8906	18.2269	19.2473	NA	18.466	19.1026	18.2934	17.9958	NA	NA
1-1_GL0014825;6-5_GL0021958;G1-7A_GL0160633	11.8437	11.8175	12.0197	NA	11.7517	12.5529	12.598	12.7205	10.8933	12.7691	11.1633	11.6114	NA	12.0996	11.4411	13.2771	11.5555	11.9712	NA	12.0682	10.7998	12.2294	10.9393	11.8622
11_GL0014868	15.402	17.988	14.0855	16.82	17.3892	20.2786	19.3071	17.9304	16.6206	19.6373	15.1081	13.8182	15.7404	17.49	17.3732	18.7926	14.6688	17.2038	16.7879	17.2505	16.3713	18.8848	17.4934	17.5565
11_GL0014868;3-5_GL0033094	14.6039	17.6351	13.9942	16.1827	16.7029	19.3073	18.1499	17.3184	15.6589	18.6805	14.0248	12.4675	14.4205	16.9149	16.0992	17.7867	14.1092	16.2441	15.7859	16.1199	15.5728	17.7323	16.8188	16.9464
11_GL0014907	10.7737	NA	NA	NA	11.8351	11.3058	12.0415	10.7807	NA	NA	9.76965	9.93132	13.225	12.2717	12.3153	10.2724	9.93261	NA	11.7594	NA	11.7339	NA	NA	NA
11_GL0014907;2-8_GL0070180;20_GL0075659;Group2-8A_GL0149820;MC-0-3_GL0022317;S-Fe2_GL0080896	13.886	13.225	13.7579	13.5394	15.1928	14.8873	14.4673	14.0436	14.4544	12.6804	13.8315	13.499	15.8203	15.1083	15.2963	14.5649	13.7283	13.7942	14.8092	14.1876	14.7747	14.8426	13.1287	12.7414
11_GL0014907;2-8_GL0070180;20_GL0075659;MC-0-3_GL0022317	14.5335	13.0868	14.0276	13.1903	16.2355	15.4072	15.4079	14.7214	14.5671	13.3886	14.581	14.0752	17.1338	16.5679	16.559	15.2168	14.4944	14.2713	15.7363	14.7584	16.1739	16.0265	13.7915	13.5577
11_GL0014907;2-8_GL0070180;20_GL0149676;Group2-8A_GL0149820;S-Fe2_GL0080896	NA	NA	NA	NA	NA	NA	NA	14.3163	NA	NA	NA	NA	NA	NA	NA	NA	NA	NA	NA	NA	NA	NA	NA	NA
1-1_GL0014971;3-5_GL0123684;5-8_GL0124693;8-3_GL0099509	NA	NA	NA	NA	NA	NA	NA	15.3851	14.8026	NA	NA	14.2159	14.7194	NA	NA	NA	NA	NA	NA	NA	15.1612	NA	15.5887	NA
1-1_GL0014971;3-5_GL0123684;8-3_GL0099509	NA	NA	NA	NA	10.6509	NA	NA	12.5024	12.6916	NA	NA	NA	12.1392	11.0032	10.5496	11.4963	12.3172	NA	NA	NA	NA	NA	12.5788	NA
1-1_GL0014971;3-5_GL0123684;8-3_GL0099509;Group2-1A_GL0029726	NA	NA	14.3066	12.8387	13.9738	14.484	14.2273	14.8756	14.4448	14.9587	NA	NA	NA	14.0899	13.6836	16.2008	13.0112	14.0191	13.0353	NA	14.6803	NA	15.9659	14.8221
1-1_GL0014971;5-8_GL0124693;8-3_GL0099509	NA	13.5875	NA	15.3246	14.6774	15.8522	15.1694	17.365	13.6114	14.4693	NA	13.9596	14.0591	14.6247	15.1258	14.2975	13.8115	14.2906	13.9536	14.7294	15.0799	15.1539	14.2527	14.4027
1-1_GL0014971;8-3_GL0099509;Group2-1A_GL0029726	NA	NA	NA	NA	12.3574	13.8598	NA	12.8989	12.6941	12.691	12.0705	NA	12.5931	NA	NA	13.0224	NA	12.1569	NA	NA	13.2739	12.4862	NA	12.5871
11_GL0015040	12.689	13.7745	13.7478	14.6102	13.4736	13.2924	NA	12.1859	12.6826	12.2676	14.0209	NA	14.6586	13.3517	13.8272	12.2731	12.5285	NA	14.3712	12.8868	13.2002	14.0447	11.5058	NA
1-1_GL0015108	15.4088	16.3858	16.0947	16.4581	14.3231	16.2775	13.7262	16.4094	15.4888	14.5116	15.6934	14.6625	13.9058	14.5376	15.3078	14.5291	16.3587	14.3323	16.6192	14.8398	14.9377	16.3796	16.0733	13.4361
1-1_GL0015108;MC-0-3_GL0069398	16.2241	17.6458	18.0811	17.6687	15.6929	16.1269	14.2145	16.173	15.6536	15.8312	16.0996	14.9449	14.8146	15.793	15.4699	15.2683	17.0838	14.2224	15.7871	14.5116	14.9525	15.8978	16.3604	14.9514
11_GL0015288	12.5012	NA	13.4247	NA	14.7055	14.803	16.3674	15.1531	13.2461	NA	NA	NA	14.1727	14.8628	13.5514	16.0818	13.0263	14.0406	13.016	14.0563	13.8842	13.077	15.7472	NA
11_GL0015288;1A-dyr4-07_GL0093212;2-1_GL0036258;3-1_GL0085386;4-7_GL0127008;4-7_GL0132820;4-8_GL0078270;5-2_GL0022232;5-2_GL0103665;5-7_GL0107009;6-7_GL0039704;8-2_GL0009262;8_GL0142198;G1-5A_GL0105476;Group2-4A_GL0154951;Group2-7A_GL0062225;MC-6-1_GL0019122;S-Fe10_GL0058389;S-Fe10_GL0069545;S-Fe8_GL0104469	18.636	17.5174	17.5553	17.8807	19.2578	19.2666	19.8092	19.1453	18.8628	16.8845	19.4773	18.3794	20.3086	19.4442	19.498	18.7233	18.1912	18.6298	19.5621	18.9899	19.9442	19.7236	17.9194	17.9416
11_GL0015288;1A-dyr4-07_GL0093212;2-1_GL0036258;3-1_GL0085386;4-7_GL0127008;4-7_GL0132820;4-8_GL0078270;5-2_GL0103665;5-7_GL0107009;6-7_GL0039704;7-5_GL0122860;8-2_GL0009262;8_GL0142198;G1-5A_GL0105476;Group2-4A_GL0154951;Group2-7A_GL0062225;MC-0-1_GL0059229;MH-6-5_GL0074415;S-Fe10_GL0058389;S-Fe20_GL0132961;S-Fe8_GL0104469	NA	11.1528	10.7262	11.6512	12.4554	12.0722	12.1325	NA	NA	11.9746	11.8454	NA	NA	12.1897	12.3769	12.0266	11.7414	NA	12.3438	12.6761	12.9235	11.9448	11.4735	10.9419
11_GL0015288;1A-dyr4-07_GL0093212;2-1_GL0036258;3-1_GL0085386;4-7_GL0127008;4-7_GL0132820;5-4_GL0123921;7-5_GL0122860;8_GL0142198;G1-5A_GL0105476;S-Fe10_GL0058389	16.5726	NA	NA	NA	NA	NA	NA	NA	NA	15.7936	NA	NA	NA	NA	16.9579	NA	NA	NA	NA	NA	NA	NA	NA	NA
11_GL0015288;1A-dyr4-07_GL0093212;4-7_GL0127008;4-7_GL0132820;4-8_GL0078270;5-2_GL0022232;7-5_GL0122860;8-2_GL0009262;8_GL0142198;Group2-4A_GL0154951;Group2-7A_GL0062225;S-Fe10_GL0058389;S-Fe8_GL0104469	12.1549	12.5555	11.7357	13.0083	13.6028	14.1286	14.5767	14.8912	14.4748	12.6545	13.7053	NA	NA	13.8859	14.2923	14.6213	13.7476	14.3236	14.6047	13.8694	NA	14.6948	14.3108	14.165
11_GL0015288;1A-dyr4-07_GL0093212;4-7_GL0132820;5-2_GL0022232;8_GL0142198	14.1892	13.5856	13.4813	13.3798	15.3548	15.044	14.6995	14.8112	14.4333	13.5613	13.6968	12.4234	14.6534	15.4158	14.8173	15.5549	14.5082	15.0882	14.7474	13.8323	15.4592	16.129	14.5324	14.6682
11_GL0015288;4-7_GL0127008;4-7_GL0132820	NA	14.0178	15.1305	NA	15.6138	15.1231	16.3484	NA	NA	NA	14.064	NA	NA	15.8149	14.4302	17.351	14.5416	14.8306	NA	14.8157	NA	NA	NA	13.3383
11_GL0015288;4-7_GL0132820	12.0853	NA	13.0737	NA	14.1102	14.4187	15.7671	15.2737	13.3161	12.1663	13.6417	12.4667	NA	14.3093	13.6706	15.061	13.2628	14.4755	12.92	14.0604	NA	NA	15.0314	12.8449
11_GL0015288;4-7_GL0132820;5-2_GL0022232;5-7_GL0107009;8_GL0142198;Group2-7A_GL0062225;S-Fe20_GL0132961	NA	NA	NA	NA	13.3093	NA	NA	NA	NA	NA	NA	NA	NA	13.472	13.4079	NA	NA	NA	NA	NA	NA	NA	NA	NA
11_GL0015307;Group2-6A_GL0116707	13.9079	15.6792	12.6766	14.768	15.1847	15.3282	15.6258	NA	13.5249	14.6545	14.7448	12.522	15.7268	15.0856	15.5259	14.7424	14.6991	14.7014	14.1963	13.4648	14.5195	15.4194	13.9445	13.7197
1-1_GL0015695	12.8508	16.2081	14.4505	17.1817	13.8324	16.2987	13.8181	15.1806	13.4451	14.8079	13.8906	13.5378	12.989	13.6637	12.8044	12.2209	12.9041	13.9622	13.656	13.3786	14.1452	13.7854	12.9349	12.9544
1-1_GL0015695;MC-6-2_GL0157885;S-Fe10_GL0011383	16.3397	17.7919	18.2136	18.079	15.7564	15.5311	14.3866	15.1284	16.0093	14.3432	16.7553	13.6193	16.549	15.7084	16.9849	16.323	16.6063	15.0665	16.9436	15.1433	16.5821	17.3065	16.9488	14.135
1-1_GL0015696	12.626	15.6478	13.5611	16.5017	12.9723	15.4859	13.1816	14.4937	12.9702	14.2982	13.2841	13.0431	12.7168	13.0911	12.0776	NA	12.5211	13.4475	12.7659	13.2115	13.6874	13.6876	12.64	12.5188
1-1_GL0015814	9.16788	NA	NA	NA	11.47	11.0818	11.9897	11.0478	10.6752	NA	NA	10.7836	9.98035	11.8713	NA	NA	11.1612	11.1879	NA	NA	10.9133	11.0119	11.3876	NA
1-1_GL0015814;6-4_GL0006541;Group2-3A_GL0186028;MH-6-4_GL0059762	11.8352	11.2265	11.2707	12.0974	12.632	13.0572	13.2438	13.0937	11.8305	12.6537	12.4227	12.6196	12.6218	12.6442	11.1406	11.5744	12.7406	13.2141	12.9551	12.1658	12.9926	12.9889	12.2931	12.6212
1-1_GL0015814;Group2-3A_GL0186028	NA	13.6801	12.6046	15.0536	15.0694	14.6034	15.0064	NA	NA	15.1366	NA	NA	NA	15.5158	NA	14.6034	15.0444	16.1642	14.1275	15.3868	NA	14.8878	NA	15.3611
1-1_GL0016117	12.405	13.5866	13.0817	14.1514	NA	11.8115	NA	12.0141	NA	11.1791	NA	NA	13.129	NA	12.9177	NA	NA	NA	11.5589	10.5043	12.5639	12.8336	NA	NA
11_GL0017325;1A-dyr5-06_GL0059240;2B-dyr24-07_GL0039540;3-1_GL0089305	16.2665	14.0548	15.0247	14.3132	16.976	16.7116	16.9536	15.9558	16.2236	14.5135	15.7456	15.4274	16.9143	16.947	12.3993	16.1921	16.1387	15.8746	16.4999	16.3416	16.6389	16.4397	16.4818	15.8363
1-1_GL0017506	11.2825	9.77727	NA	NA	11.6857	12.2671	12.5712	12.284	11.2664	11.3637	NA	NA	NA	11.7386	NA	NA	NA	11.9822	NA	11.8554	12.0805	11.1288	NA	NA
1-1_GL0017506;17_GL0156635	13.3555	14.0471	NA	NA	13.632	14.7457	15.7989	15.1129	14.6793	15.4776	13.6988	14.2217	13.013	13.8618	13.1582	16.8027	13.0991	14.3755	NA	14.9031	15.4809	16.139	15.5849	17.7285
1-1_GL0017506;17_GL0156635;20_GL0118731;20_GL0164740;MC-6-3_GL0102708;MC-6-4_GL0086125;MH-6-2_GL0021684;MH-6-4_GL0138109;MH-6-4_GL0175531	15.5572	14.7882	13.714	13.2748	14.2397	14.1039	15.7286	15.5246	15.0639	15.0599	14.5168	15.573	15.4814	14.3804	14.9988	15.9778	14.1916	14.7808	14.4444	15.5166	15.2436	15.1395	14.578	16.071
1-1_GL0017506;17_GL0156635;20_GL0118731;MC-6-3_GL0102708;MC-6-4_GL0086125;MH-6-2_GL0021684;MH-6-4_GL0138109;MH-6-4_GL0175531	15.6398	15.1405	14.3948	13.783	13.6357	14.3057	16.2125	15.2468	16.0863	16.0909	NA	16.7312	14.0207	13.8541	13.9033	16.1226	14.5496	15.6627	14.5008	15.2744	15.7788	15.3178	15.417	16.0565
1-1_GL0017506;17_GL0156635;20_GL0118731;MC-6-3_GL0102708;MH-6-4_GL0132126;MH-6-4_GL0138109	NA	NA	NA	NA	NA	NA	NA	NA	NA	NA	NA	NA	NA	13.8843	NA	15.9403	13.8483	NA	NA	NA	NA	NA	NA	NA
1-1_GL0017506;17_GL0156635;20_GL0164740;MC-6-3_GL0102708;MC-6-4_GL0086125;MH-6-2_GL0021684;MH-6-4_GL0138109;MH-6-4_GL0175531	14.8083	15.8556	14.6986	NA	15.7606	15.822	16.9062	14.4225	15.8081	16.7432	15.7509	16.4333	16.4256	15.8762	16.2263	16.5141	14.2403	15.7624	15.6829	16.1473	16.2562	15.9895	16.0067	17.0246
1-1_GL0017506;17_GL0156635;MC-6-3_GL0102708;MC-6-4_GL0086125;MH-6-2_GL0021684;MH-6-4_GL0138109	14.3231	14.7902	13.9431	12.7033	14.9727	15.5376	17.3295	14.7757	15.6601	16.5099	15.3401	17.4151	17.2012	15.1644	15.0579	16.853	14.1624	15.5728	13.5506	15.4665	16.3728	16.0343	16.4584	17.4455
1-1_GL0017506;17_GL0156635;MC-6-3_GL0102708;MC-6-4_GL0086125;MH-6-2_GL0021684;MH-6-4_GL0138109;MH-6-4_GL0175531	12.7927	13.8234	11.9766	11.7325	12.9205	12.8878	14.8644	12.8558	NA	14.3122	13.3246	14.461	14.8092	13.0776	12.8628	14.1048	12.0824	13.252	12.6058	13.7312	NA	13.8388	13.8514	15.2448
1-1_GL0017506;17_GL0156635;MC-6-3_GL0102708;MC-6-4_GL0086125;MH-6-4_GL0138109;MH-6-4_GL0175531	14.2665	14.8199	14.4843	NA	15.4187	14.9096	16.5868	NA	NA	16.6082	15.4971	NA	NA	15.6619	15.058	16.6622	14.1448	15.52	14.2186	15.7405	NA	15.3929	NA	17.415
1-1_GL0017506;17_GL0156635;MC-6-4_GL0086125;MH-6-4_GL0138109	12.8494	13.2482	12.8642	11.0151	13.3669	13.9213	15.8275	13.7101	14.5867	14.8285	14.0672	16.1313	13.7937	13.5174	12.2799	15.2878	12.8358	13.6653	12.907	14.2096	14.874	14.5156	15.0523	16.1835
1-1_GL0017506;17_GL0156635;MH-6-2_GL0021684;MH-6-4_GL0132126	13.7959	14.2152	12.7546	11.6447	14.2478	14.4682	16.5883	14.5509	14.8305	15.3233	14.8275	16.61	14.6536	14.2286	13.3023	15.7356	12.4915	14.5325	12.9284	14.8389	15.5975	15.0633	15.4191	16.5388
1-1_GL0017506;17_GL0156635;MH-6-4_GL0132126	NA	11.7478	NA	NA	NA	NA	14.0331	11.7862	12.1055	13.2944	12.583	14.9734	NA	NA	NA	13.5579	11.6805	NA	NA	NA	13.4363	NA	13.7941	14.5631
1-1_GL0017506;MC-6-4_GL0086125	10.4094	12.0973	NA	NA	12.5535	13.67	14.7775	12.4948	12.7421	12.6928	12.0624	NA	11.4319	12.6919	11.482	13.6759	11.1697	11.8045	NA	13.3665	12.6494	13.9219	12.1012	15.1448
1-1_GL0017506;MH-6-4_GL0132126	13.2268	14.4084	12.9952	NA	13.8712	14.7286	15.2838	13.6646	15.9503	15.1588	13.7089	NA	14.0019	13.9061	NA	NA	13.3939	15.034	12.7322	15.194	13.4405	13.1297	NA	NA
1-1_GL0018142	NA	NA	12.0255	NA	NA	NA	NA	11.3199	11.2833	10.6957	11.1241	11.966	11.7626	NA	10.2997	NA	15.8446	13.8228	11.8105	NA	12.0005	NA	15.6276	12.3134
11_GL0018497	NA	NA	NA	NA	NA	NA	NA	NA	NA	NA	NA	NA	13.9102	NA	12.9035	NA	NA	NA	14.2907	NA	NA	NA	NA	14.2907
11_GL0018497;11_GL0023226;11_GL0128753;1A-dyr4-07_GL0079687;5-4_GL0100790;6-6_GL0126785;7-5_GL0132685;G1-7A_GL0111510;MC-6-2_GL0112990;S-Fe6_GL0192593	13.5267	12.8887	12.3645	12.8428	14.117	15.2401	15.0216	13.9671	14.7183	12.2318	13.8431	13.0382	14.6437	14.2443	14.4217	15.1641	13.2086	13.7315	14.9145	13.5343	14.5641	16.1243	13.6625	15.0753
11_GL0018497;11_GL0128753;1A-dyr4-07_GL0079687	10.8572	NA	NA	NA	11.8015	12.6391	12.1466	11.2813	11.4506	NA	NA	NA	12.1561	11.6157	11.8667	11.2512	11.2257	NA	12.1044	10.9932	12.8169	14.166	11.8667	10.7669
11_GL0018497;11_GL0128753;1A-dyr4-07_GL0079687;5-4_GL0100790;G1-7A_GL0111510;S-Fe6_GL0192593	NA	9.90782	8.66993	10.6358	12.7985	NA	12.5808	12.0636	NA	NA	10.4663	NA	12.2947	13.6126	11.2396	10.6348	13.4642	NA	12.2809	NA	12.092	13.563	10.786	12.1646
11_GL0018497;1A-dyr4-07_GL0079687	14.5221	12.4775	12.2651	11.7371	14.2574	14.7613	NA	12.9953	14.3054	13.5808	14.0767	NA	13.731	14.2375	14.4248	14.1695	13.7786	13.868	14.7472	13.681	14.951	16.3426	13.5015	14.2726
11_GL0018497;1A-dyr4-07_GL0079687;5-4_GL0100790	12.9749	11.7157	12.6746	12.4095	14.3676	14.5843	NA	13.6498	14.0097	13.6482	13.5317	11.5243	14.2109	14.3613	13.4431	14.1102	14.4507	13.9227	14.4001	13.3604	14.8165	16.0946	13.981	14.5172
11_GL0018497;1A-dyr4-07_GL0079687;5-4_GL0100790;7-5_GL0132685;S-Fe16_GL0001211	15.5699	15.8075	14.821	15.5966	17.5288	16.8698	17.3213	16.8716	16.7531	14.7706	16.8535	15.3519	17.4308	17.4301	17.8013	16.828	16.4042	16.5517	16.8236	16.1474	17.0255	18.0807	15.5674	16.7636
11_GL0018497;1A-dyr4-07_GL0079687;MC-6-2_GL0112990	15.7392	14.1277	14.2741	14.2935	16.6066	16.5671	14.2473	14.071	15.5202	14.5296	15.4908	12.7719	16.5109	16.7037	16.2792	15.4204	15.269	15.9846	16.751	15.4101	16.6076	17.7798	14.7985	15.5332
11_GL0018497;5-4_GL0100790;MC-6-2_GL0112990	14.7187	NA	NA	13.3946	14.8451	15.6976	12.4973	13.8775	14.4866	NA	14.7719	NA	14.8552	14.8734	14.3401	14.893	13.2531	14.5141	15.561	14.262	15.4193	17.1642	14.1975	15.164
11_GL0020259	17.2501	17.5668	17.1519	16.768	16.5596	16.6622	16.5085	17.228	15.7094	15.3252	17.2858	17.1478	16.3919	16.7435	17.4195	16.6596	16.2669	15.7869	17.0726	16.7122	15.5209	16.7426	16.7904	15.4145
11_GL0020260	13.9846	14.592	13.3376	12.6104	NA	NA	11.6251	13.581	10.8427	NA	13.5568	14.0216	12.5738	NA	11.4898	12.3648	12.9001	11.2868	12.7439	12.9459	12.1115	11.8719	13.4872	12.6646
11_GL0020263	12.8614	13.6405	11.9063	12.7308	NA	NA	11.9804	12.6633	NA	NA	12.1139	13.5092	12.096	NA	NA	13.0879	NA	11.858	13.1233	12.7852	13.3964	12.2886	13.0604	NA
11_GL0020264	11.1171	11.8169	NA	9.33277	NA	NA	9.82687	11.7844	NA	NA	13.9788	12.5027	11.8506	NA	NA	NA	NA	NA	13.1282	NA	11.6116	NA	11.584	NA
1-1_GL0020905	NA	NA	NA	NA	NA	11.7342	NA	NA	NA	NA	NA	NA	12.2095	NA	12.496	NA	NA	NA	NA	NA	12.0837	NA	NA	NA
1-1_GL0020905;1-1_GL0048366;1-1_GL0048765;1-1_GL0092522;11_GL0041387;1A-dyr4-07_GL0009722;1A-dyr4-07_GL0092337;2-2_GL0114153;2-5_GL0007106;3-1_GL0086169;3-5_GL0005950;3-5_GL0037612;32_GL0111881;35_GL0124728;4-1_GL0072049;4-2_GL0006302;4-2_GL0086461;4-3_GL0063589;4-4_GL0083540;4-7_GL0089492;43_GL0029674;5-1_GL0032553;5-2_GL0024931;5-6_GL0012253;5-6_GL0015745;6-5_GL0008930;6-6_GL0089718;8-4_GL00566…	13.4675	12.0088	11.4244	12.9112	16.0417	16.1551	15.6479	15.4838	14.9996	13.9332	13.2896	14.0305	16.5932	15.5707	15.8455	14.5802	15.4947	15.4907	15.9714	15.2787	15.7577	15.9197	14.8421	14.9662
1-1_GL0020905;1-1_GL0048366;1-1_GL0048765;1-1_GL0092522;1-2_GL0125305;1-7_GL0120747;11_GL0041387;1A-dyr4-07_GL0009722;1A-dyr4-07_GL0092337;2-1_GL0031200;2-3_GL0015512;2-5_GL0007106;2-5_GL0023856;2-8_GL0005311;3-1_GL0086169;3-5_GL0070222;32_GL0111881;4-1_GL0007488;4-1_GL0044489;4-1_GL0072049;4-2_GL0006302;4-2_GL0086461;4-3_GL0063589;4-4_GL0083540;4-7_GL0028961;4-7_GL0089492;43_GL0029674;5-1_GL0032…	19.6278	17.5885	17.4462	18.0903	20.3855	19.9876	20.9439	NA	21.2139	18.2393	19.3607	17.4336	20.152	20.3969	20.2405	19.2739	19.1577	20.2735	19.8309	19.9357	19.2342	20.5866	22.6723	18.9259
1-1_GL0020905;1-1_GL0048366;1A-dyr4-07_GL0092337;4-1_GL0072049;4-2_GL0006302;4-7_GL0028961;5-1_GL0032553;6-6_GL0089718;8-4_GL0056649;Group2-4A_GL0103032;Group2-6A_GL0070759;Group2-8A_GL0153883	12.3963	NA	10.9693	NA	16.907	16.479	14.9619	15.5284	13.5325	NA	15.0795	12.8299	15.8868	14.6845	16.3198	13.4081	15.2982	NA	16.409	NA	14.9553	15.1545	14.1647	14.1479
1-1_GL0020905;1-1_GL0048765;1-1_GL0092522;1-2_GL0125305;1-7_GL0120747;11_GL0041387;1A-dyr4-07_GL0009722;1A-dyr4-07_GL0092337;2-1_GL0031200;2-2_GL0114153;2-3_GL0002598;2-3_GL0015512;2-5_GL0007106;2-5_GL0023856;2-8_GL0005311;3-1_GL0086169;3-5_GL0005950;3-5_GL0070222;32_GL0111881;4-1_GL0007488;4-1_GL0072049;4-2_GL0006302;4-2_GL0086461;4-3_GL0063589;4-4_GL0083540;4-7_GL0028961;4-7_GL0089492;43_GL0029…	12.1914	10.8415	10.7275	10.3706	14.9765	15.6116	14.7598	14.6385	12.0722	12.6304	12.4876	11.9988	15.8038	14.6936	15.7082	13.362	14.2493	14.3245	14.9666	13.3822	15.2269	14.3796	13.1738	12.8
1-1_GL0020905;1-1_GL0048765;1-1_GL0092522;1-2_GL0125305;1-7_GL0120747;11_GL0041387;1A-dyr4-07_GL0009722;1A-dyr4-07_GL0092337;2-1_GL0031200;2-2_GL0114153;2-3_GL0015512;2-5_GL0007106;2-5_GL0023856;2-8_GL0005311;3-1_GL0086169;3-5_GL0005950;3-5_GL0070222;32_GL0111881;4-1_GL0007488;4-1_GL0072049;4-2_GL0006302;4-2_GL0086461;4-3_GL0063589;4-4_GL0083540;4-7_GL0028961;4-7_GL0089492;43_GL0029674;5-1_GL0032…	NA	NA	NA	NA	10.5212	12.864	12.2198	NA	NA	NA	NA	NA	NA	NA	12.0674	NA	NA	10.7156	12.2476	NA	NA	12.1963	NA	NA
1-1_GL0020905;1-1_GL0048765;1-1_GL0092522;1-2_GL0125305;1-7_GL0120747;11_GL0041387;2-1_GL0031200;2-3_GL0002598;2-3_GL0015512;2-5_GL0007106;2-5_GL0023856;2-8_GL0005311;3-1_GL0086169;3-5_GL0070222;32_GL0111881;4-1_GL0007488;4-1_GL0072049;4-2_GL0006302;4-3_GL0063589;4-4_GL0083540;4-7_GL0028961;4-7_GL0089492;43_GL0029674;5-1_GL0032553;5-2_GL0024931;6-5_GL0072187;7-5_GL0167262;7-8_GL0106456;8-1_GL0074…	12.2757	11.7468	12.977	11.6743	12.8873	13.0852	13.5062	13.4318	12.1514	12.6521	12.7895	13.0344	12.7054	13.5009	12.9927	12.8031	12.4027	12.2472	12.1369	12.4272	12.4942	12.8183	13.0523	12.0399
1-1_GL0020905;1-1_GL0048765;1-1_GL0092522;2-3_GL0002598;32_GL0111881;7-8_GL0106456;G1-1A_GL0021347	NA	NA	NA	NA	12.4491	13.9166	13.0153	12.8645	NA	NA	11.5224	NA	12.8036	12.8564	13.7029	12.3118	13.2288	12.3474	14.2622	NA	14.3325	13.3477	NA	12.2502
1-1_GL0020905;1-1_GL0092522;2-2_GL0114153;2-3_GL0002598;3-1_GL0086169;32_GL0111881;4-7_GL0028961;7-8_GL0106456;G1-5A_GL0009874;G1-5A_GL0103365;S-Fe20_GL0190164	NA	NA	12.8164	NA	13.9967	13.7401	14.0422	14.7878	NA	NA	NA	13.4337	13.1631	13.9031	NA	NA	NA	NA	NA	NA	13.4429	NA	12.6955	NA
1-1_GL0020905;1-2_GL0125305;2-2_GL0114153;4-1_GL0007488;4-3_GL0063589;S-Fe6_GL0118707	14.2728	NA	NA	NA	15.4703	15.9998	12.2799	16.4644	14.2283	11.3598	14.1216	14.612	15.7561	15.5097	NA	16.3922	NA	16.5452	15.6205	16.2636	13.1382	16.1402	14.7476	NA
1-1_GL0020905;1A-dyr4-07_GL0092337;2-2_GL0114153;6-3_GL0073361;6-5_GL0008930;8-4_GL0056649;Group2-3A_GL0181197;Group2-4A_GL0103032;Group2-8A_GL0153883	12.8903	NA	NA	NA	13.3808	NA	14.7258	NA	NA	NA	NA	NA	NA	NA	15.02	NA	13.4689	14.6773	13.2043	14.113	NA	NA	13.6824	NA
1-1_GL0020905;2-3_GL0015512;6-5_GL0008930;8-4_GL0056649;Group2-8A_GL0153883	19.3183	10.2286	NA	NA	17.1275	17.4897	19.7767	18.3526	17.1374	15.7738	18.2506	18.9625	18.5743	17.563	18.9669	17.2326	17.0367	17.9214	19.0026	19.7108	17.3561	17.5582	16.3035	17.0757
11_GL0021566	11.9798	NA	NA	NA	13.6527	13.4104	14.4809	NA	12.9515	NA	13.312	NA	12.9298	13.5657	13.1466	12.1966	14.2176	12.4116	12.8977	NA	14.2916	14.0012	NA	12.6927
11_GL0021566;4-8_GL0087691	13.2324	NA	14.6737	12.9296	15.0082	15.085	16.3266	15.018	12.0595	11.9027	14.9548	12.0383	14.7575	14.8921	14.5477	16.5196	14.1471	15.0842	13.5337	14.8362	14.7985	15.3231	16.2665	13.7956
11_GL0021639	NA	NA	NA	NA	11.7488	NA	NA	NA	14.0245	12.4445	NA	NA	NA	NA	12.2384	NA	12.7235	13.4473	NA	NA	NA	NA	NA	NA
11_GL0021639;11_GL0096694;1A-dyr4-07_GL0006518;2-2_GL0089525;2-2_GL0125109;2B-dyr24-06_GL0041129;4-1_GL0023024;4-2_GL0000258;4-3_GL0040377;4-3_GL0046141;5-2_GL0027202;7-5_GL0112823;G1-5A_GL0015726;Group2-3A_GL0057192;Group2-8A_GL0111398;MC-6-2_GL0171741;MH-6-5_GL0063556;S-Fe6_GL0007083	19.4064	15.5849	15.3902	15.8864	17.2758	16.1354	NA	NA	NA	19.273	NA	NA	19.4635	NA	16.1016	NA	NA	NA	16.108	NA	13.8122	NA	NA	17.0242
11_GL0021639;11_GL0096694;1A-dyr4-07_GL0006518;2-2_GL0089525;4-2_GL0000258;4-3_GL0040377;4-3_GL0046141;5-2_GL0027202;G1-5A_GL0015726;Group2-3A_GL0057192;Group2-8A_GL0111398;MC-6-2_GL0171741;MH-6-5_GL0063556	16.2916	14.5587	15.0821	14.5652	16.1106	15.4749	16.1977	15.9577	NA	15.1085	15.6364	NA	NA	16.1243	15.9141	15.7778	16.2528	15.8411	15.1412	16.307	NA	15.459	17.9372	15.5011
11_GL0021639;11_GL0096694;2-2_GL0089525;5-2_GL0027202;G1-5A_GL0015726;Group2-3A_GL0057192	12.9016	NA	11.2407	11.0719	NA	12.546	NA	NA	NA	NA	12.8519	NA	NA	13.0526	12.7261	12.6725	NA	NA	NA	NA	NA	13.2181	13.8039	NA
11_GL0021639;11_GL0096694;5-2_GL0027202;54_GL0079325;G1-5A_GL0015726;Group2-3A_GL0057192;Group2-8A_GL0111398;MC-6-2_GL0171741	16.5249	16.4303	16.2885	16.1103	16.8287	16.5012	17.3645	16.3779	17.0314	15.3122	16.5597	15.5227	17.486	17.0456	17.1878	16.6606	16.4128	16.7786	17.368	16.3062	17.3127	16.6855	16.1884	16.278
11_GL0021639;11_GL0096694;5-2_GL0027202;G1-5A_GL0015726	11.2743	NA	NA	NA	13.1062	14.0238	NA	12.3393	12.4992	NA	NA	NA	14.5915	13.1926	13.1576	11.959	13.2689	NA	12.9095	NA	13.5066	14.4753	12.2486	13.7592
11_GL0021641	NA	NA	13.0181	NA	13.5331	13.51	14.3097	13.4953	12.7637	13.6199	13.6983	14.037	14.5296	13.5708	14.9708	12.1323	14.1501	12.8964	14.3478	13.7025	14.6583	13.9053	12.0672	13.2079
11_GL0021641;7-4_GL0130722	NA	NA	NA	NA	11.6804	NA	NA	NA	NA	NA	NA	NA	11.3629	12.2676	12.7571	NA	12.4082	10.9781	10.4484	NA	11.632	11.6847	NA	NA
11_GL0021701	NA	11.9288	NA	11.0945	13.4886	14.8862	13.2567	13.2001	11.3503	12.7038	NA	NA	13.3898	13.5857	13.472	13.684	NA	NA	NA	NA	14.0099	13.7492	13.8905	12.0719
11_GL0021701;16_GL0103773;23_GL0097013;2A-dyr16-07_GL0057446;32_GL0088143;5-8_GL0048195;6-6_GL0043770;G1-1A_GL0049582;MC-0-1_GL0010773;MC-0-1_GL0029955;MC-0-3_GL0011860;MC-6-4_GL0074673;MC-6-5_GL0057260;MH-6-5_GL0010319;S-Fe8_GL0188873	NA	NA	NA	NA	NA	NA	NA	NA	NA	NA	NA	NA	NA	16.1958	NA	NA	NA	NA	NA	NA	NA	NA	NA	NA
11_GL0021701;16_GL0103773;6-6_GL0043770;G1-1A_GL0049582;MC-0-1_GL0010773	15.4879	15.9349	15.372	15.3268	14.859	16.8685	16.108	NA	14.747	15.3946	16.03	NA	14.9868	15.2972	16.7794	15.8286	15.0777	15.1648	15.9709	15.6189	NA	16.4832	16.9764	14.4137
11_GL0021701;20_GL0040658;6-6_GL0043770	NA	NA	NA	NA	13.0122	NA	NA	NA	NA	NA	NA	NA	NA	12.9367	13.3718	NA	12.372	NA	NA	NA	NA	NA	NA	11.2087
11_GL0021701;4-1_GL0023341;6-6_GL0043770;MH-6-4_GL0118888;MH-6-5_GL0010319	14.9472	15.715	14.6159	15.1352	15.9397	17.3409	16.4853	16.4699	15.5814	16.7148	15.2928	15.6205	16.8717	16.1145	16.7125	16.5831	15.8454	16.148	16.8052	16.1473	16.6138	17.0856	16.7356	15.3228
11_GL0021701;6-6_GL0043770	14.6243	14.9507	13.8242	14.3931	15.3886	17.6452	16.9494	16.0118	15.1836	16.2438	14.5511	14.8869	13.6406	15.2993	15.5293	16.139	14.8831	15.8113	15.2987	15.57	14.8933	15.7326	15.3165	14.5737
11_GL0021701;6-6_GL0043770;MH-6-4_GL0118888;MH-6-5_GL0010319	NA	NA	NA	NA	NA	13.0243	NA	NA	NA	NA	NA	NA	NA	NA	NA	NA	NA	NA	12.4929	NA	NA	12.7426	NA	NA
1-1_GL0022476	13.275	15.3052	16.32	14.1052	16.3291	16.8572	12.5164	16.0395	16.7991	15.0315	15.7137	16.5265	15.5808	16.4532	15.224	13.84	17.8249	16.8033	17.0465	15.2869	16.1637	NA	NA	15.5997
1-1_GL0022476;1-1_GL0080710	13.7965	15.2102	15.3518	14.1499	15.1717	15.7608	12.8038	15.4755	16.0431	13.3346	15.7575	16.0802	15.2717	15.4047	14.97	14.7621	16.5731	16.1051	16.0516	15.2089	16.2207	NA	14.8507	15.3029
1-1_GL0022476;1-1_GL0080710;2-1_GL0115202;2-4_GL0063036;3-5_GL0058721	13.3635	12.6552	11.8902	12.3993	NA	13.4279	13.3515	11.8335	13.3515	11.8975	NA	12.8659	13.2041	13.7649	12.6724	12.6034	14.3839	13.3219	13.7275	NA	13.7915	10.9942	13.2857	13.3515
1-1_GL0022476;4-1_GL0012700	13.7997	15.1115	16.2231	14.196	16.4861	16.1289	13.7168	15.704	16.3243	15.2175	15.4649	14.0883	15.1073	16.4361	15.722	15.6834	17.5683	16.2506	16.5335	15.3326	15.8159	13.6255	14.2013	15.8247
1-1_GL0022565;1-1_GL0141678;11_GL0054940;2-3_GL0050515;34_GL0041794;4-8_GL0109418;Group2-3A_GL0001191;S-Fe20_GL0185811	18.083	15.3257	15.6557	14.573	16.2687	16.5829	17.6541	14.018	16.7194	15.19	16.4173	17.3326	13.6645	16.6692	16.8839	17.4677	15.3986	14.7413	16.7632	17.1488	17.2132	15.1417	16.1689	16.7866
1-1_GL0022565;34_GL0041794	13.3865	13.4192	13.5354	12.8122	14.0688	15.0565	14.9022	14.7266	14.4588	13.4182	12.8181	NA	12.4153	14.0342	13.3109	12.5724	14.5626	13.6531	14.6563	12.5723	15.6042	11.288	NA	13.1501
1-1_GL0022715	12.1722	12.7859	12.966	13.1684	NA	12.1266	NA	12.3435	NA	NA	12.0569	NA	NA	NA	12.8393	NA	12.0907	NA	13.2088	11.7989	11.6243	13.1923	12.487	NA
1-1_GL0022715;11_GL0014907;11_GL0139734;1A-dyr2-07_GL0028344;2-8_GL0070180;20_GL0014296;20_GL0149676;20_GL0156837;6-6_GL0069165;Group2-8A_GL0149820;MC-0-1_GL0050997;MC-6-2_GL0094206;MC-6-3_GL0028764;MH-6-2_GL0033799;S-Fe10_GL0076443;S-Fe10_GL0104485;S-Fe10_GL0173635;S-Fe2_GL0080896	17.8543	18.0631	17.8485	18.0761	17.6437	17.6843	16.5165	17.6841	16.8424	15.4589	18.1525	16.7511	18.5054	17.5173	18.2867	17.0998	16.0606	16.3513	18.746	17.5633	18.0172	18.7313	NA	15.7538
1-1_GL0022715;1A-dyr2-07_GL0028344;20_GL0014296;MC-0-1_GL0050997;MC-0-3_GL0041542;MC-6-2_GL0094206;MC-6-3_GL0028764;MH-0-3_GL0071339;S-Fe10_GL0076443;S-Fe10_GL0104485;S-Fe10_GL0173635	NA	NA	13.0433	12.6502	12.0974	12.4421	NA	12.4596	NA	NA	12.1433	NA	13.8	12.6403	12.8844	NA	12.0022	NA	12.6343	NA	12.0928	12.714	NA	NA
1-1_GL0022715;MC-0-3_GL0041542	14.8192	NA	15.7442	NA	14.515	14.802	12.5788	NA	14.076	11.9425	14.7757	NA	16.3232	NA	15.8112	13.6496	13.4892	NA	15.7966	14.1168	15.18	16.1108	14.2408	NA
11_GL0023226	NA	NA	NA	NA	NA	NA	13.3112	NA	NA	NA	NA	NA	NA	12.8846	12.9248	NA	NA	NA	NA	NA	NA	13.3141	NA	NA
11_GL0023226;3-5_GL0022718;6-6_GL0126785;8-8_GL0048439;G1-5A_GL0023352	15.1171	14.3326	14.2093	13.9931	16.2218	15.8374	16.0093	15.4265	16.2539	14.7339	16.2157	15.1151	16.7075	16.3274	16.6606	15.2673	16.2078	15.9016	17.1835	15.9202	17.313	16.2138	15.3755	14.6625
11_GL0023226;6-6_GL0126785	13.6754	12.3226	11.256	12.2842	14.2033	14.4059	15.3584	14.065	13.8335	13.1886	13.2343	13.6263	14.4535	14.2736	14.8685	13.7894	13.3476	13.8846	14.921	14.01	15.3522	16.3111	15.1956	12.6322
1-1_GL0023432	15.587	NA	NA	14.3633	NA	NA	NA	NA	NA	13.907	NA	NA	NA	NA	NA	NA	NA	NA	NA	NA	NA	13.0981	15.682	NA
1-1_GL0023432;2-1_GL0006988	10.335	NA	NA	8.91607	10.761	NA	10.0989	NA	9.74441	NA	NA	NA	10.242	10.9099	11.633	10.6412	NA	NA	NA	NA	10.664	NA	10.1792	NA
1-1_GL0023432;2-1_GL0006988;6-2_GL0031725;Group2-1A_GL0027790	16.8604	15.2832	16.8258	16.1915	17.6699	15.9011	18.1032	15.1463	17.1083	16.1624	15.9834	14.8863	17.4977	17.8277	18.724	17.5442	13.5753	16.9633	NA	13.0525	17.3946	14.4651	16.5292	17.2737
1-1_GL0023432;6-2_GL0031725;Group2-1A_GL0027790	NA	NA	13.3545	NA	17.3679	NA	NA	NA	14.6942	14.6293	NA	11.4507	15.2953	17.1588	14.3025	NA	14.0183	17.084	12.8578	12.0076	15.9816	NA	16.2293	18.1576
1-1_GL0023442;52_GL0098467;8-2_GL0008326;S-Fe8_GL0209974	13.1559	13.0501	12.9615	13.17	13.6597	14.7367	13.8911	13.8307	13.7788	13.1496	13.3557	12.9145	13.4468	13.4814	13.8825	13.413	13.9825	13.5358	13.4427	13.1119	13.8176	14.1543	12.1258	12.963
1-1_GL0024396;1-2_GL0124123;3-5_GL0068802;52_GL0002358;MH-6-2_GL0088874;S-Fe20_GL0143740	NA	NA	NA	NA	NA	NA	NA	11.7242	10.0102	NA	NA	11.0133	12.7349	NA	NA	NA	NA	NA	NA	NA	12.006	NA	10.1956	NA
1-1_GL0024532	12.8545	NA	13.8099	NA	13.8836	NA	14.0313	11.7737	13.9748	12.202	13.1448	11.81	11.9369	13.9852	12.5198	NA	15.7278	13.5077	12.7814	NA	12.6286	NA	13.619	NA
11_GL0024984	NA	NA	12.0321	11.7797	13.8497	13.1616	14.6032	11.9238	12.8046	12.367	NA	NA	NA	14.0125	NA	11.3115	13.4396	12.8754	NA	NA	NA	NA	NA	13.5558
11_GL0024984;2-1_GL0102409;2-3_GL0002950;G1-5A_GL0139500;MH-6-4_GL0075386	17.1455	15.0225	16.2526	14.7	15.9937	16.0116	16.0811	15.9604	15.998	15.2727	15.6443	16.6755	16.3206	16.0202	15.6482	15.4481	16.0578	15.9492	16.5987	16.6668	15.6349	15.1967	16.0954	15.4863
11_GL0024984;2-1_GL0102409;G1-5A_GL0139500	16.3805	16.0756	16.2093	16.1973	17.7194	17.223	18.2124	16.1331	16.4302	15.9465	16.4213	14.9224	16.694	17.9977	17.4832	16.768	16.2061	16.3585	15.3883	15.4041	16.8906	15.3134	16.5162	16.3641
11_GL0025380	NA	NA	16.9443	NA	16.6082	16.0901	17.3893	17.6592	13.1749	NA	NA	12.2673	14.2609	16.8855	13.9938	19.2893	12.7179	16.5303	12.9314	15.3953	15.3194	11.905	18.6916	NA
11_GL0025380;S-Fe3_GL0160040	NA	12.5586	15.9979	12.4679	15.471	15.9746	16.9736	16.3939	13.5294	12.0306	12.4933	12.4741	13.7023	15.4984	12.8221	18.2859	14.4458	16.6494	14.3858	15.5129	14.2746	11.6801	17.2869	11.1327
1-1_GL0025390	12.7925	NA	12.3118	NA	13.3644	12.8816	13.5925	13.8639	12.8788	NA	NA	13.8443	12.7498	13.2102	13.5542	14.0516	13.359	13.6884	NA	14.3359	13.5803	13.2208	14.3419	13.8389
1-1_GL0025390;19_GL0026803;25_GL0027332;3-3_GL0067842;3-5_GL0064703;G1-6A_GL0095196;S-Fe9_GL0264014	NA	NA	NA	NA	16.0557	NA	NA	NA	NA	NA	NA	NA	NA	NA	NA	14.7086	16.2394	NA	NA	NA	16.1168	NA	NA	NA
1-1_GL0025390;3-3_GL0067842;3-5_GL0064703;G1-6A_GL0095196;S-Fe9_GL0264014	13.1236	12.2799	14.2848	14.1064	14.9823	14.9322	15.1513	13.8057	13.8865	15.071	13.9632	15.2282	14.5082	14.802	15.3073	13.6924	15.0653	15.8789	14.3498	14.2922	14.4985	13.6132	14.5019	15.5005
1-1_GL0025390;3-5_GL0064703;S-Fe9_GL0264014	NA	NA	NA	NA	NA	NA	NA	12.7554	NA	NA	NA	13.9885	12.6012	NA	NA	NA	NA	NA	NA	NA	13.0157	NA	NA	NA
1-1_GL0025390;S-Fe9_GL0264014	12.9288	NA	14.2654	11.5583	13.2486	14.4803	14.1435	13.6842	13.7631	13.1209	14.2272	15.0343	13.6182	13.4614	15.6223	12.2749	13.9201	14.1581	13.9423	14.7825	14.1308	13.8827	13.9916	12.8399
11_GL0025673	14.3314	13.0411	NA	13.3809	14.4753	14.9735	16.0708	16.5837	12.6133	15.5598	14.2207	15.7075	15.5665	14.6555	15.0134	15.3611	14.3852	NA	15.2464	13.835	NA	NA	11.6692	NA
11_GL0025982	13.9238	11.7599	10.6121	13.9324	14.7796	13.4755	13.8414	NA	NA	NA	NA	12.8974	14.4284	13.9988	15.2715	13.5329	13.4904	NA	13.8669	13.4434	14.9411	15.099	12.5924	13.5547
11_GL0025982;2-2_GL0043407;3-7_GL0070473;4-7_GL0087480;Group2-1A_GL0028415;S-Fe17_GL0015509	NA	NA	NA	NA	NA	NA	NA	12.8918	NA	NA	NA	NA	NA	NA	NA	NA	NA	NA	NA	NA	NA	NA	NA	NA
11_GL0025983	NA	NA	NA	NA	13.2244	NA	NA	NA	NA	NA	NA	NA	13.8053	13.6623	14.6784	13.1806	14.8167	NA	NA	NA	14.9254	13.4316	NA	NA
11_GL0025983;11_GL0048662;1A-dyr4-07_GL0110966;7-2_GL0009749;7-8_GL0139379;MC-0-3_GL0075365	13.1054	13.3866	13.9924	13.8661	15.9376	15.5957	15.2969	15.1998	15.194	13.728	14.5787	14.7638	15.9611	16.1133	15.3633	15.2665	15.6295	15.4455	16.0966	15.4864	16.3598	15.2704	15.7528	14.113
11_GL0025983;11_GL0048662;2-1_GL0087205;2-1_GL0100511;2-1_GL0102392	16.288	13.4044	14.4779	13.8353	15.7771	14.5468	15.955	14.4384	13.6886	12.6617	15.2373	15.3039	15.8599	15.1791	16.3438	15.754	13.4137	14.1576	15.934	16.3761	15.3325	15.6669	14.4444	14.7954
11_GL0025983;17_GL0100210;1A-dyr4-07_GL0110966	NA	NA	10.8368	11.761	13.9432	NA	13.3598	NA	13.3246	13.246	11.6945	NA	14.5141	13.6804	14.7056	13.257	14.2522	14.3047	13.9026	NA	14.6347	13.6827	14.0409	14.6435
1-1_GL0026484	NA	NA	NA	NA	12.4313	13.2167	NA	12.7928	14.1848	11.3505	11.5814	NA	12.2424	12.7105	11.6556	NA	14.1854	13.0161	13.3932	NA	12.6287	NA	NA	11.8402
11_GL0026527;20_GL0175919;G1-5A_GL0015696	NA	NA	NA	NA	NA	12.429	NA	NA	NA	NA	NA	NA	11.9839	11.9053	NA	NA	NA	NA	NA	NA	NA	NA	NA	NA
1-1_GL0026529;1-1_GL0063097;2_GL0136110;4-6_GL0015699;4-7_GL0067539;5-1_GL0040177;5-4_GL0113635;G1-4A_GL0032122;MH-6-2_GL0119841	15.2073	16.1741	17.2818	16.7594	19.0587	19.1096	18.4392	19.6973	18.1971	18.2249	17.3548	16.2874	18.0364	19.0677	18.4458	18.3109	19.7514	19.1826	17.5639	16.7793	18.6731	18.2356	18.896	18.8021
1-1_GL0026529;1-1_GL0063097;2_GL0136110;MH-6-2_GL0119841	11.8963	14.0282	14.4452	14.3919	14.428	16.0366	NA	15.8722	14.3934	13.5982	13.2276	12.019	12.9097	14.2476	14.4965	14.6938	16.809	15.367	14.6155	13.1331	14.7339	11.5413	NA	14.5506
1-1_GL0026529;1-1_GL0063097;2-1_GL0122637;2_GL0136110;4-1_GL0013931;5-1_GL0040177;5-4_GL0113635;G1-4A_GL0032122;G1-5A_GL0015335;MH-6-2_GL0119841	12.1263	15.1828	15.7715	14.0411	16.0251	16.5349	12.7605	16.508	15.9406	15.141	15.9734	17.2499	15.7449	16.0578	17.5726	16.0439	17.3552	18.1002	16.4369	15.9625	16.3845	15.9961	17.321	18.0808
1-1_GL0026529;1-1_GL0063097;2-1_GL0122637;2_GL0136110;4-6_GL0015699;7-4_GL0056601;MH-6-2_GL0119841	NA	NA	NA	NA	NA	NA	NA	NA	13.7203	NA	NA	NA	11.2661	NA	13.3875	NA	NA	NA	NA	13.0428	NA	NA	15.4261	NA
1-1_GL0026529;2_GL0136110;4-6_GL0015699;5-8_GL0067825;8-2_GL0113497;G1-8A_GL0014960;MH-6-2_GL0119841	13.2642	13.1335	15.1342	11.5039	16.0262	16.0295	14.6394	15.5526	15.708	15.0747	15.4942	13.2128	15.0366	16.1808	11.9546	12.7684	17.2079	14.5	15.5795	14.0666	15.897	10.831	12.4104	13.9337
1-1_GL0026529;2_GL0136110;G1-4A_GL0032122;MH-6-2_GL0119841	13.7456	15.6124	17.4764	13.7693	17.684	17.5134	13.1714	16.6625	16.7012	15.9292	15.6679	13.0514	16.7767	17.5007	15.7391	NA	19.2554	17.1461	16.892	14.7025	15.6256	NA	16.5885	17.2654
1-1_GL0026529;2_GL0136110;MH-6-2_GL0119841	NA	12.0199	13.8202	NA	12.4731	14.1324	NA	14.2777	14.1221	12.1532	11.8078	NA	11.5444	12.5505	10.7762	NA	15.2152	13.3841	13.2395	11.6463	12.9217	NA	NA	13.2844
1-1_GL0026635	13.7003	NA	12.591	NA	15.5417	12.6832	15.6274	14.5445	16.4336	14.5184	14.1175	15.0279	13.4922	15.6552	15.3356	NA	14.8146	17.5504	13.6688	14.7375	16.9486	NA	18.6679	18.5002
1-1_GL0026635;S-Fe20_GL0074192	14.8147	10.6377	13.4601	NA	16.5789	15.3712	17.0826	17.2114	16.2336	15.3578	15.2428	15.0536	14.2754	16.5865	16.5998	11.741	15.4682	18.9905	14.5832	15.8472	17.235	12.7969	18.4722	18.6303
1-1_GL0026659;1-7_GL0013213;1A-dyr2-07_GL0047831;38_GL0154616;MC-0-1_GL0089983;MC-6-2_GL0022982;MC-6-2_GL0187073;MC-6-3_GL0028466;S-Fe18_GL0057188;S-Fe1_GL0135833	14.6137	16.0122	15.7615	16.43	14.3365	14.8324	12.2019	13.0532	13.6633	12.1659	14.71	13.0221	16.1189	NA	14.9047	12.8366	12.31	12.2985	16.2101	14.7263	14.5349	15.7284	12.9241	NA
1-1_GL0026659;1-7_GL0013213;38_GL0154616;MC-0-1_GL0089983;MC-6-2_GL0022982	14.1016	15.591	16.0865	15.5429	14.1144	13.5625	11.5384	13.132	13.7744	11.8967	15.5169	15.5587	17.1473	14.431	14.6837	11.9395	11.8467	11.9827	15.7875	13.635	17.229	15.1183	NA	NA
1-1_GL0026659;1-7_GL0013213;S-Fe1_GL0135833	14.1024	16.2288	16.1768	15.9066	13.4263	13.095	10.9895	12.2979	13.2911	NA	15.0584	NA	15.118	13.1745	14.954	12.2455	11.5502	11.7611	15.5547	NA	NA	15.8072	12.6674	NA
1-1_GL0026659;38_GL0154616;MC-6-2_GL0022982;MC-6-2_GL0187073;MC-6-3_GL0028466;S-Fe1_GL0135833	NA	12.1573	11.7675	13.524	12.0112	11.8618	NA	11.7225	NA	NA	12.3346	11.4117	12.7505	12.2712	NA	NA	11.4898	NA	13.1069	11.4479	12.2577	13.1247	NA	NA
1-1_GL0026806	13.577	13.6953	13.4079	11.8628	13.4958	10.9456	10.5755	10.6254	12.8709	11.7262	13.1328	10.8563	12.5701	13.1842	13.4455	11.767	11.7992	11.4423	12.7937	12.3943	11.8075	13.5911	13.7809	11.3378
1-1_GL0026921	11.4012	11.6936	12.9463	NA	13.7664	14.4526	NA	13.0018	14.0114	11.704	12.784	NA	13.1285	13.8922	13.1466	NA	14.7133	13.4118	14.8801	11.976	13.8658	NA	NA	13.0988
1-1_GL0026921;1-1_GL0053280;1-1_GL0108808;1-1_GL0125402;17_GL0140266;1A-dyr2-07_GL0026662;1A-dyr4-07_GL0079686;2-1_GL0027603;2-1_GL0110697;2-3_GL0096811;2-5_GL0077425;2-8_GL0091870;20_GL0037957;20_GL0151793;29_GL0044239;2A-dyr14-06_GL0053548;3-7_GL0022026;38_GL0029624;5-2_GL0041195;5-3_GL0043541;5-8_GL0013686;6-1_GL0092358;6-2_GL0077856;7-2_GL0063560;7-5_GL0132686;8-1_GL0116808;G1-1A_GL0026386;G1…	17.5359	14.554	14.4018	16.2269	18.2566	17.5019	18.6701	16.4072	18.9868	15.6571	17.7757	15.8165	20.4374	18.4044	17.8212	17.1535	18.0291	17.5285	17.5477	17.6324	19.8432	18.0529	17.7988	16.6657
1-1_GL0026921;1-1_GL0125402;1-1_GL0151261;1-2_GL0107126;2-1_GL0027603;2-1_GL0110697;2-3_GL0096811;2-5_GL0077425;2-6_GL0032560;29_GL0044239;35_GL0101222;5-2_GL0041195;6-1_GL0092358;6-8_GL0003714;7-2_GL0063560;8-3_GL0043222;G1-1A_GL0026386;G1-3A_GL0105564;Group2-3A_GL0003312;Group2-3A_GL0110902;Group2-4A_GL0002093;Group2-8A_GL0080257;S-Fe20_GL0128883	NA	NA	NA	NA	NA	NA	NA	11.3098	NA	NA	NA	NA	NA	NA	NA	NA	NA	NA	NA	NA	12.5229	NA	NA	NA
1-1_GL0026921;1-1_GL0125402;1A-dyr2-07_GL0026662;2A-dyr14-06_GL0053548;3-7_GL0022026;5-3_GL0043541;5-8_GL0013686;8-1_GL0116808;G1-1A_GL0026386;G1-5A_GL0023353;G1-6A_GL0013371;Group2-3A_GL0207018;Group2-8A_GL0080257	14.2576	14.2622	14.4451	14.136	16.2375	16.1961	16.1113	NA	16.0198	14.325	15.265	15.4384	16.5184	16.6139	16.4383	14.6726	16.078	16.2246	16.4213	15.3485	16.9351	14.7513	14.9414	14.5789
1-1_GL0026921;1-1_GL0125402;1A-dyr2-07_GL0026662;2A-dyr14-06_GL0053548;3-7_GL0022026;5-8_GL0013686;8-1_GL0116808;G1-1A_GL0026386;G1-6A_GL0013371;Group2-3A_GL0207018;Group2-8A_GL0080257	13.9609	12.8577	14.0402	13.8097	15.4528	15.1028	15.9323	15.2856	14.9471	14.0582	14.295	14.1663	15.068	15.5143	13.8927	15.5585	15.2205	14.9554	14.5012	14.7043	15.691	14.4912	15.4883	14.5683
1-1_GL0026921;1-1_GL0125402;5-3_GL0043541	9.49116	10.4126	10.9248	10.8238	11.3748	12.2639	NA	11.7126	11.6686	NA	10.0291	NA	11.8675	11.4182	11.472	11.0958	12.7859	11.019	12.6851	9.32203	12.7915	NA	10.6278	NA
1-1_GL0027389	15.7676	14.7269	14.766	14.6254	13.2866	13.4649	12.1837	14.2127	13.0131	11.8473	14.7525	13.0461	NA	13.451	13.0908	NA	14.0051	11.9899	15.3391	13.5063	NA	12.801	NA	NA
1-1_GL0027389;1_GL0054117	15.9812	14.8568	16.3483	14.8261	13.6289	13.7582	12.3885	13.4422	13.1086	12.235	15.1248	13.2934	12.8712	13.8008	13.6465	11.3237	13.9918	NA	15.018	13.5525	12.7264	13.5575	13.51	NA
1-1_GL0027390	14.9608	14.2902	14.7492	13.5649	12.7179	12.4931	11.859	NA	NA	10.515	13.9133	NA	NA	12.935	NA	NA	13.776	10.5743	14.2957	12.834	NA	11.8923	NA	NA
1-1_GL0027394	14.8589	14.8788	15.6254	15.5263	15.6971	14.9743	15.7609	16.6132	16.1681	16.5884	14.172	16.5098	15.0349	15.5919	16.349	15.7832	17.8194	16.2295	15.3021	15.8724	14.5523	16.3131	16.2763	17.2008
1-1_GL0027394;3-3_GL0049024	13.8463	13.8559	14.6267	14.2947	14.9176	13.9518	14.9662	15.2705	15.2888	15.1578	15.0511	15.4564	14.1174	14.8843	15.8368	14.6438	16.3774	15.6817	16.4737	14.5395	14.4995	15.0626	15.059	15.4806
1-1_GL0027394;3-3_GL0049024;4-2_GL0084019	NA	NA	NA	NA	NA	NA	NA	13.5441	NA	NA	NA	13.8235	NA	NA	NA	NA	NA	NA	NA	NA	12.8438	NA	NA	NA
1-1_GL0027791	NA	12.0223	12.7203	13.1305	15.4045	14.887	16.5827	15.0778	NA	NA	15.1232	16.1364	15.0571	15.5644	13.4546	11.6028	NA	NA	NA	15.7665	NA	14.3604	NA	NA
1-1_GL0028152	15.4624	16.062	15.5442	16.326	14.5815	14.2923	12.9511	14.7716	14.7563	13.17	15.7414	14.3758	14.0604	14.5027	14.5154	13.8854	15.2512	13.7626	16.2117	15.4172	13.7443	15.6329	13.7725	12.2473
1-1_GL0028152;MC-0-3_GL0005764	17.0228	18.4491	17.9258	18.1942	16.7322	16.6554	14.9057	15.4689	16.5013	13.6627	18.0272	15.2005	17.6146	16.7452	17.256	16.5597	17.0549	15.6646	17.6416	16.3793	15.1247	17.1624	16.7601	13.6241
11_GL0028376	15.7793	16.1779	NA	NA	13.9618	13.3491	15.092	16.7935	13.7666	12.4892	16.6309	15.9515	16.0026	14.0377	NA	14.6505	15.9494	14.5165	15.848	16.1244	15.0461	14.5541	NA	NA
11_GL0028376;2-3_GL0015512;3-5_GL0037612;5-7_GL0068497	NA	NA	NA	NA	NA	12.539	15.8838	NA	12.6866	NA	NA	16.5233	13.3135	NA	12.1153	NA	NA	NA	15.0076	16.7521	13.5392	13.8852	NA	NA
11_GL0028428	14.4064	15.4945	12.9717	13.8155	11.4625	11.1786	12.4953	14.0967	10.519	11.0983	14.6553	13.894	10.9964	11.7181	NA	12.335	14.1177	12.3087	14.1991	14.0408	12.5451	12.4221	13.4898	11.6922
11_GL0028428;11_GL0055314	14.9408	16.1109	14.2523	14.3305	12.8236	12.0624	13.2469	15.582	11.6932	11.5644	15.4819	14.893	14.7543	12.7064	14.3467	14.3366	14.7259	13.3931	14.9496	14.7196	13.9531	13.4324	15.7682	14.0423
11_GL0028479	15.715	16.3881	14.9237	15.1177	12.1938	12.2649	12.9735	15.0358	12.2739	11.8847	14.922	15.3523	14.1286	12.448	13.2126	14.2011	13.9647	12.6179	14.4521	14.0434	13.6732	13.9767	14.9376	14.0059
11_GL0028479;11_GL0061743;11_GL0062569	13.9342	14.0345	12.995	NA	10.9899	11.6093	11.8923	14.1003	12.1242	11.8704	13.9317	14.0772	12.4378	11.7895	12.3723	12.6881	13.1031	11.9066	12.9364	13.3909	12.5916	12.0374	12.7425	12.9514
11_GL0028479;11_GL0062569	NA	NA	NA	NA	NA	NA	NA	16.4133	NA	NA	NA	15.4012	14.379	NA	NA	NA	NA	NA	NA	NA	14.0824	NA	NA	NA
11_GL0028482	16.5926	17.4502	15.9044	15.4732	13.5344	NA	13.462	15.9743	13.2507	NA	15.5554	16.1166	14.8433	13.4401	14.0037	14.5101	14.7277	13.3611	14.8048	15.3824	13.8431	14.3751	15.2801	14.7013
11_GL0028482;1A-dyr4-07_GL0019666;2-2_GL0119514;2A-dyr14-06_GL0053546;2_GL0109744;5-6_GL0009184;5-7_GL0138952;8-1_GL0112958;8-4_GL0073668;G1-5A_GL0086325;G1-6A_GL0013373;S-Fe12_GL0145635;S-Fe9_GL0241485	NA	NA	NA	NA	16.5944	NA	NA	NA	NA	13.9547	NA	NA	NA	NA	17.7539	NA	14.6062	14.9913	NA	NA	NA	NA	NA	NA
11_GL0028522	16.0776	17.4384	15.6859	15.7267	13.167	12.9174	13.5358	15.6311	13.3106	NA	15.9175	16.1776	14.6899	13.0908	14.0879	14.9038	14.666	13.8976	14.6634	15.394	14.4174	14.3652	15.978	14.79
11_GL0028522;1_GL0021401;25_GL0015924;6-1_GL0074586;8-1_GL0083080	15.8502	15.8662	15.129	14.5152	14.6896	13.3235	14.4618	14.7036	14.9406	14.142	15.6059	15.5044	14.2741	14.7049	15.4238	13.9903	14.5821	14.3148	15.1953	15.2452	14.1506	13.782	15.3725	13.7613
11_GL0028522;25_GL0015924	13.5664	13.5971	11.998	12.1164	NA	9.99892	11.2014	13.0833	NA	12.891	12.9355	13.0848	11.8483	NA	NA	NA	12.0926	NA	11.9476	12.188	11.1415	11.6539	12.6877	12.3229
11_GL0028522;2B-dyr23-07_GL0020466;6-3_GL0116019	12.3202	15.3024	11.2957	14.5423	13.6221	13.7702	12.0277	13.765	12.8258	13.8394	12.3077	13.2696	13.3051	13.5451	13.3369	13.6146	12.0483	13.5425	11.5926	12.0618	14.5088	13.4679	13.7267	12.5635
11_GL0028561	14.7185	15.7232	13.7521	14.0272	NA	11.73	12.5709	13.8627	12.3877	11.4476	14.3308	14.2952	13.2155	NA	12.8821	12.962	13.3989	12.041	13.7144	13.7274	12.9541	12.6872	13.6087	13.3583
1-1_GL0028661	NA	NA	NA	NA	12.0703	12.6913	12.1064	12.6776	NA	NA	NA	NA	12.2544	12.2969	12.7348	NA	NA	NA	NA	NA	12.2157	12.6467	13.1138	12.9419
1-1_GL0028661;20_GL0009554	10.9362	10.2559	11.0933	NA	NA	11.3658	12.3295	13.9023	12.5256	11.8561	12.2641	11.8673	NA	NA	12.8955	NA	12.5641	11.9753	12.846	NA	NA	12.2353	12.1425	12.3145
1-1_GL0028661;MC-0-1_GL0002410	NA	NA	NA	NA	13.5002	14.0954	13.2477	14.0284	NA	NA	NA	NA	13.7605	13.2623	13.8169	13.5717	NA	NA	NA	NA	14.0738	14.107	14.4148	13.9148
11_GL0028726	NA	NA	NA	NA	15.9863	15.3245	15.9372	NA	NA	NA	NA	NA	NA	16.1348	NA	10.6823	10.8299	NA	NA	NA	NA	NA	NA	15.4889
11_GL0028726;Group2-4A_GL0001770	NA	NA	NA	NA	17.6157	16.633	17.2476	NA	NA	NA	NA	NA	NA	18.062	13.7798	13.3688	14.489	16.4258	NA	NA	NA	NA	NA	17.7872
1-1_GL0029103	NA	11.1547	NA	NA	13.5471	NA	13.0817	12.5263	12.92	11.6671	12.4366	12.1183	13.9887	13.4563	13.8659	11.928	13.541	13.4146	13.139	12.1453	13.0096	12.5294	13.4965	12.92
1-1_GL0029103;10_GL0011642;2-1_GL0025638;2-1_GL0032121;2-1_GL0118084;2-3_GL0037968;2-5_GL0004989;20_GL0168711;31_GL0014841;5-8_GL0142127;S-Fe10_GL0072623	13.4866	10.9273	11.9614	11.8728	14.3233	12.6888	14.1706	12.3934	12.5197	NA	13.3815	13.3583	13.5347	14.543	13.8726	12.3665	12.6107	12.102	13.9481	14.3445	13.6254	13.0686	11.2721	12.4242
1-1_GL0029103;2-1_GL0025638;2-1_GL0032121;2-1_GL0118084;2-3_GL0037968;2-5_GL0004989;31_GL0014841	12.7007	NA	NA	NA	12.0686	10.2512	12.254	10.1281	9.26533	NA	11.6017	11.5811	12.4072	12.2622	12.1928	10.3366	NA	NA	12.0638	12.3166	11.742	9.95081	9.74093	NA
1-1_GL0029103;2-1_GL0025638;2-1_GL0032121;2-1_GL0118084;2-3_GL0037968;2-5_GL0004989;31_GL0014841;5-8_GL0142127;S-Fe10_GL0072623	NA	NA	NA	NA	NA	NA	NA	15.4361	NA	NA	NA	NA	NA	NA	NA	NA	NA	NA	NA	NA	NA	NA	NA	NA
1-1_GL0029103;2-1_GL0032121;2-3_GL0037968	NA	NA	NA	NA	NA	NA	NA	NA	NA	NA	NA	NA	11.3405	NA	NA	NA	NA	NA	11.4204	NA	10.949	NA	NA	NA
1-1_GL0029103;2-3_GL0037968;2-5_GL0004989	NA	NA	9.53225	NA	12.2052	NA	NA	11.9043	NA	NA	NA	11.8729	12.0536	12.29	11.2599	NA	12.0009	NA	NA	NA	12.3717	NA	11.9975	11.1219
1-1_GL0029103;2-3_GL0037968;2-5_GL0004989;5-8_GL0142127	12.0595	10.0925	10.5739	NA	12.5322	11.3036	13.1406	NA	11.1805	NA	11.9661	12.8063	11.5439	12.865	10.848	10.0517	11.7375	11.1018	12.7961	13.3925	11.4563	NA	10.5713	11.5046
1-1_GL0029126;1_GL0038377;2-3_GL0101170;2B-dyr24-07_GL0040417;G1-4A_GL0014180;S-Fe8_GL0195589	17.9368	NA	15.6881	NA	17.0399	16.3912	17.2469	15.6334	15.6613	14.8038	16.3719	16.711	16.7018	17.237	15.9099	16.3521	16.0104	15.5273	16.9585	17.8081	16.4019	15.5125	NA	16.7995
1-1_GL0029126;1_GL0038377;2B-dyr24-07_GL0040417;3-6_GL0039132;4-8_GL0033433;5-1_GL0073748;G1-4A_GL0014180;S-Fe8_GL0195589	15.4275	15.0257	15.5737	15.4046	17.0578	16.8676	16.5302	15.9741	16.2158	14.2059	15.7779	15.6683	17.5202	17.0578	17.2283	16.456	15.7088	15.817	17.3629	16.2052	17.2937	17.2037	16.0577	14.5858
1-1_GL0029126;11_GL0051057;2B-dyr24-07_GL0040417;38_GL0134307;4-2_GL0117370;4-8_GL0033433;5-1_GL0073748;6-2_GL0017794;G1-4A_GL0014180;G1-5A_GL0006982;MC-6-1_GL0066073;S-Fe8_GL0195589	NA	NA	NA	NA	NA	NA	NA	13.3518	10.88	NA	NA	NA	14.0746	NA	NA	NA	NA	NA	NA	NA	11.9197	NA	NA	NA
1-1_GL0029126;1-1_GL0082829;11_GL0155660;2B-dyr24-07_GL0040417;38_GL0134307;4-8_GL0033433;G1-4A_GL0014180;MC-6-1_GL0066073;S-Fe8_GL0195589	17.4063	16.1442	17.2209	16.3552	19.1988	18.6221	18.8118	17.9082	18.2951	16.8459	17.8361	17.7854	18.6199	19.2831	18.396	18.486	18.1755	18.3582	18.8716	18.4625	18.5229	17.751	18.2426	17.9866
1-1_GL0029126;1-1_GL0082829;17_GL0098350;1_GL0038377;2-1_GL0052359;2-1_GL0064618;2-2_GL0060647;2-3_GL0101170;2B-dyr24-07_GL0040417;3-6_GL0039132;34_GL0024708;4-8_GL0033433;G1-4A_GL0014180;G1-5A_GL0006982;Group2-1A_GL0062679;S-Fe8_GL0195589	18.0134	17.1558	18.0757	16.8903	19.4358	18.1242	18.5503	NA	17.8863	15.342	17.5749	NA	18.4879	18.8073	18.2733	18.4079	18.0039	16.8782	18.6986	18.4523	NA	17.2295	18.0478	17.6855
1-1_GL0029126;11_GL0155660;17_GL0098350;1_GL0038377;2-1_GL0064618;2-2_GL0060647;2-3_GL0101170;2B-dyr24-07_GL0040417;3-6_GL0039132;34_GL0024708;38_GL0134307;6-2_GL0017794;G1-5A_GL0006982	NA	11.5891	13.3519	11.9041	13.9524	NA	13.3802	12.2034	12.2938	NA	12.5866	12.7807	13.9409	13.9683	13.8487	13.3346	13.13	NA	13.2471	13.2485	13.2169	13.3688	12.6065	12.5781
1-1_GL0029126;2-1_GL0064618;2-3_GL0101170;2B-dyr24-07_GL0040417;3-6_GL0039132;4-8_GL0033433;G1-4A_GL0014180;S-Fe8_GL0195589	17.0718	NA	15.1355	NA	17.2497	15.7979	16.7159	14.6026	16.473	NA	16.2095	15.8265	17.1703	17.4459	NA	16.3301	16.1357	15.3252	16.1306	16.8108	16.7573	15.4209	NA	16.1056
1-1_GL0029126;2-1_GL0064618;2B-dyr24-07_GL0040417;3-6_GL0039132;4-8_GL0033433;G1-4A_GL0014180;S-Fe8_GL0195589	15.4599	14.6814	15.2409	15.1081	16.9472	16.6674	16.3715	15.7555	15.7769	14.4617	15.2365	15.3528	17.6487	17.1836	17.2712	16.3092	15.1375	14.5084	16.8864	15.0567	16.9403	16.4091	15.7497	14.5512
1-1_GL0029126;2B-dyr24-07_GL0040417;4-8_GL0033433;G1-4A_GL0014180;G1-5A_GL0006982;S-Fe8_GL0195589	NA	NA	NA	NA	10.8949	NA	NA	NA	NA	NA	NA	NA	NA	10.7273	10.5987	8.94666	9.69755	10.4497	NA	NA	NA	NA	NA	9.90004
1-1_GL0029126;2B-dyr24-07_GL0040417;G1-4A_GL0014180;G1-5A_GL0006982;MC-6-1_GL0066073;S-Fe8_GL0195589	14.6604	14.3089	13.1988	14.9654	17.1043	16.274	15.573	15.4375	15.732	14.4183	15.5274	15.5092	16.1388	17.3533	14.3943	16.1262	16.2557	15.1464	16.5736	16.3592	15.6496	16.0556	14.8589	15.5487
1-1_GL0029135	16.6195	NA	NA	13.5996	14.1928	13.9077	14.8685	14.6497	13.2944	NA	15.5332	17.3744	14.0467	14.559	13.9292	14.3435	13.8973	14.4643	14.8027	15.8146	14.1469	14.1668	14.1801	14.4096
1-1_GL0029135;1-1_GL0151489;1-5_GL0055782;2-1_GL0073987;2-1_GL0089702;2-2_GL0123342;2-3_GL0042236;2-3_GL0090842;28_GL0073235;3-1_GL0049920;38_GL0090539;4-1_GL0073237;4-7_GL0002310;5-1_GL0066416;5-1_GL0073757;5-4_GL0097816;5-7_GL0046612;7-2_GL0015190;7-5_GL0112810;MC-6-2_GL0171754;S-Fe14_GL0055615	18.6487	16.9078	14.5664	16.516	17.6928	17.2798	16.292	16.5796	16.5088	NA	15.4305	16.551	16.5631	17.9995	16.4797	17.6079	14.4212	NA	NA	NA	16.5574	18.2031	16.3046	18.0897
1-1_GL0029135;1-1_GL0151489;1-5_GL0055782;2-1_GL0073987;2-1_GL0089702;2-2_GL0123342;2-3_GL0042236;2-3_GL0090842;28_GL0073235;3-1_GL0049920;4-1_GL0073237;5-1_GL0073757;5-4_GL0097816;5-7_GL0046612;6-2_GL0084700;7-2_GL0015190;MC-6-2_GL0171754;S-Fe14_GL0055615	17.3657	15.4802	16.134	15.3395	17.9137	17.5424	17.7805	16.884	17.9104	16.2338	17.1087	17.9172	18.0558	17.7559	17.8605	17.4144	17.4648	17.3568	17.5641	17.9388	17.9546	16.9541	16.8838	17.1548
1-1_GL0029135;1-1_GL0151489;1-5_GL0055782;2-1_GL0073987;2-1_GL0089702;2-2_GL0123342;2-3_GL0042236;2-3_GL0090842;28_GL0073235;3-1_GL0049920;4-1_GL0073237;5-1_GL0073757;5-4_GL0097816;6-2_GL0084700;7-2_GL0015190;MC-6-2_GL0171754;S-Fe14_GL0055615	18.9306	16.3241	17.3161	16.2503	18.4426	18.5883	18.7706	18.2817	18.553	16.9463	17.8804	18.8186	18.7108	18.9846	18.4066	18.4591	18.249	18.1068	18.2154	18.5529	17.9835	18.0246	17.6079	18.6973
1-1_GL0029135;1-5_GL0055782;28_GL0073235;2A-dyr16-07_GL0034220;5-4_GL0097816;5-7_GL0046612;6-2_GL0084700;7-2_GL0015190;S-Fe14_GL0055615	14.03	NA	NA	NA	NA	NA	NA	NA	NA	11.9258	NA	NA	NA	NA	NA	NA	NA	NA	NA	NA	NA	NA	NA	NA
1-1_GL0029135;2-1_GL0073987;2-2_GL0123342;3-1_GL0049920;5-4_GL0097816;S-Fe14_GL0055615	15.185	NA	NA	NA	NA	16.1013	16.1783	NA	15.7998	15.0555	NA	NA	16.3539	NA	NA	NA	15.746	15.9274	16.2137	NA	15.8417	15.8867	15.7462	NA
1-1_GL0029135;2-2_GL0123342;28_GL0073235;5-1_GL0073757;6-5_GL0017794;S-Fe14_GL0055615	NA	NA	NA	NA	NA	13.277	13.1394	NA	NA	NA	NA	NA	12.9066	NA	NA	NA	NA	12.564	13.7271	12.2783	NA	12.7944	NA	12.9656
1-1_GL0029135;2-3_GL0042236;3-1_GL0049920;4-1_GL0073237;5-4_GL0097816;6-2_GL0084700;MC-6-2_GL0171754	17.9698	14.731	15.5824	14.6927	17.3262	16.8701	17.4804	16.4768	16.5508	15.3797	16.4263	16.814	17.1725	17.3817	17.5705	16.4485	16.5227	16.5887	16.4323	17.7577	16.5932	15.8436	15.7523	16.5178
1-1_GL0029135;28_GL0073235;5-1_GL0066416	13.7349	14.6614	14.3742	14.2179	14.6331	15.6404	15.4797	16.0051	14.2805	12.6816	13.476	13.717	14.8677	15.3664	14.9654	15.3437	14.8422	15.2932	14.5911	14.286	15.0249	15.2725	14.9607	15.8387
1-1_GL0029135;28_GL0073235;5-1_GL0073757;S-Fe14_GL0055615	12.1385	13.0397	12.2185	13.346	15.0598	14.863	13.8336	13.5895	14.4907	12.8906	13.9452	14.3192	14.7433	14.4942	14.9732	14.3883	14.3457	14.0188	15.108	14.8501	14.1094	13.8232	13.8934	13.4817
1-1_GL0029135;2A-dyr16-07_GL0034220;5-4_GL0097816;6-2_GL0084700;S-Fe14_GL0055615	15.8278	NA	NA	NA	15.6362	14.9329	16.0295	15.3747	14.61	NA	15.2022	15.9817	14.847	15.4494	15.028	14.3015	NA	14.4113	15.4064	16.1232	15.025	13.7501	14.9189	15.1726
1-1_GL0029135;5-4_GL0097816	14.3293	NA	NA	NA	NA	NA	NA	NA	NA	NA	NA	NA	NA	NA	NA	NA	NA	NA	NA	NA	NA	NA	NA	NA
1-1_GL0029135;MC-6-2_GL0171754	16.2752	15.7795	15.5444	15.5353	17.1576	17.4435	16.7428	16.9632	17.0678	15.944	16.3378	16.9012	18.2233	17.1676	17.1344	17.2793	16.9187	16.9178	17.499	17.0292	17.6702	17.719	16.6253	17.0589
1-1_GL0029137;1_GL0095036;2-1_GL0087638;2-5_GL0020291;2-7_GL0101884;2A-dyr14-07_GL0067403;6-6_GL0028101;G1-8A_GL0100514;Group2-4A_GL0127595;S-Fe12_GL0050488	NA	NA	NA	NA	NA	NA	NA	13.0398	NA	NA	NA	NA	NA	NA	NA	NA	NA	NA	NA	NA	NA	NA	NA	NA
1-1_GL0029137;1_GL0095036;2-1_GL0087638;S-Fe12_GL0050488	12.6507	11.2117	12.7593	12.457	14.5134	14.0541	13.8676	13.6041	13.4145	11.2637	NA	NA	14.8567	14.5465	16.0479	13.751	14.0532	13.2648	14.505	NA	14.0085	14.2527	12.8343	12.6413
1-1_GL0029137;11_GL0061773;2-2_GL0129598;2-4_GL0006265;2-5_GL0020291;Group2-4A_GL0127595;S-Fe12_GL0050488	NA	NA	NA	NA	15.1218	13.5211	13.0873	12.9375	13.7266	10.2487	NA	14.1788	14.3445	15.3664	13.4663	10.8644	13.2813	13.0786	14.2433	NA	13.645	13.6327	12.9563	NA
1-1_GL0029137;1-1_GL0111801;11_GL0044796;1A-dyr4-07_GL0032856;2-1_GL0087638;2-2_GL0129598;2-4_GL0006265;2-4_GL0077588;2B-dyr19-06_GL0030526;4-2_GL0037945;G1-6A_GL0018298;Group2-2A_GL0102032;S-Fe12_GL0050488;S-Fe9_GL0169128	18.2367	17.1467	18.4998	17.2565	19.1411	18.6218	18.9971	19.1309	18.5281	16.9407	18.253	17.9124	18.8717	19.1087	18.9014	18.7016	18.3867	18.2877	18.3565	18.2784	18.3259	17.952	18.1222	18.7544
1-1_GL0029137;Group2-2A_GL0102032;S-Fe12_GL0050488	13.358	13.6948	12.1639	13.4235	13.232	12.9713	13.8976	NA	12.9551	12.9394	13.5759	NA	14.1259	13.2173	13.8534	14.5395	13.3223	14.0187	13.082	14.8281	NA	14.2818	14.0692	14.1151
1-1_GL0029149;23_GL0087795;4-8_GL0033455;6-1_GL0062514;7-6_GL0025714;G1-5A_GL0072922;MC-6-2_GL0008698;MC-6-2_GL0180605;S-Fe9_GL0228782	16.1624	16.1621	15.6744	15.9232	16.9215	17.0185	17.5321	17.2147	16.5693	14.0699	16.4544	16.0797	16.878	16.901	17.7749	16.1411	16.0526	16.1018	16.3572	16.1799	16.4553	16.7551	15.6075	15.9561
1-1_GL0029149;23_GL0087795;4-8_GL0033455;6-1_GL0062514;G1-5A_GL0072922;G1-5A_GL0090424;MC-6-2_GL0008698;S-Fe9_GL0228782	NA	NA	NA	NA	14.2817	NA	NA	12.7361	NA	14.2817	NA	NA	13.6402	NA	NA	NA	NA	NA	NA	NA	NA	NA	NA	NA
1-1_GL0029153	13.2571	12.9911	13.3317	13.4837	14.0066	13.9395	14.0146	14.836	13.6918	13.2456	NA	13.9045	13.7721	14.0346	14.5682	13.8009	14.0967	14.7479	13.5043	13.4531	13.262	14.9592	13.9743	14.1583
11_GL0029950;11_GL0040983	NA	NA	NA	12.0172	14.0664	NA	NA	15.1779	NA	NA	NA	NA	NA	13.9789	NA	13.8795	NA	NA	NA	14.6707	NA	18.0806	NA	NA
1-1_GL0029988	NA	NA	NA	NA	12.987	NA	NA	NA	NA	NA	NA	NA	14.9722	13.1123	13.5906	NA	13.8358	10.473	14.09	NA	13.5554	14.3602	12.2564	NA
1-1_GL0029988;1-1_GL0030443;1-1_GL0083995;1-1_GL0092531;11_GL0014135;11_GL0025982;14_GL0035334;1A-dyr4-07_GL0045601;1A-dyr4-07_GL0110967;2-1_GL0011849;2-1_GL0021623;2-1_GL0047228;2-1_GL0102394;2-2_GL0043407;20_GL0139296;4-7_GL0087480;5-5_GL0014515;5-7_GL0033034;6-3_GL0077178;6-6_GL0074506;7-1_GL0012015;8-1_GL0006910;8-3_GL0022294;Group2-1A_GL0028415;Group2-2A_GL0084879;Group2-8A_GL0077290;Group2-…	15.1303	NA	NA	NA	NA	NA	NA	NA	NA	NA	NA	NA	NA	NA	NA	NA	NA	NA	NA	NA	NA	NA	NA	NA
1-1_GL0029988;1-1_GL0092531	NA	NA	NA	NA	NA	12.2325	NA	NA	NA	NA	NA	NA	12.5133	NA	NA	NA	NA	NA	NA	NA	NA	NA	NA	NA
1-1_GL0029988;2-1_GL0047228	12.8388	12.488	13.8139	12.403	14.6485	13.4082	13.4726	13.4822	13.5242	12.6634	13.2092	12.8002	15.5119	14.6521	14.7642	13.6977	13.9223	12.7138	15.4106	13.8147	14.6305	14.0608	13.2518	12.5318
1-1_GL0029988;7-1_GL0012015;S-Fe9_GL0171725	15.0619	14.5199	14.416	15.1684	17.0738	16.4053	16.2726	15.3395	15.9243	14.6622	15.4007	15.6243	16.4868	17.1187	16.8195	15.5792	16.057	14.4575	16.9818	15.9597	15.9242	15.219	14.5352	14.0947
1-1_GL0029988;8-3_GL0022294;Group2-1A_GL0028415;S-Fe17_GL0015509	NA	NA	NA	NA	12.2645	NA	NA	NA	NA	NA	NA	NA	NA	12.5432	13.1651	12.0575	NA	NA	NA	NA	NA	NA	NA	NA
1-1_GL0030056;14_GL0110599;1_GL0032517;2-1_GL0067568;2-1_GL0086392;5-2_GL0064278;G1-1A_GL0003105;S-Fe10_GL0023669	10.7205	9.2179	10.7769	9.45368	11.0818	10.4394	11.0962	NA	9.4133	NA	10.7373	9.48348	9.8178	10.93	8.95303	9.26239	9.58242	NA	10.3012	11.359	9.96322	NA	NA	9.16778
1-1_GL0030056;14_GL0110599;2-1_GL0086392	11.4581	NA	11.256	10.8404	11.606	NA	12.1584	NA	10.6976	NA	10.8664	NA	11.3887	11.9725	13.3528	11.7937	NA	NA	NA	NA	11.1651	NA	NA	NA
1-1_GL0030443	13.3334	12.1986	NA	13.0849	NA	NA	NA	NA	NA	NA	NA	NA	NA	NA	12.2868	11.8973	NA	12.5151	NA	NA	12.0409	11.9844	NA	NA
1-1_GL0030443;11_GL0025982;2-2_GL0043407;3-7_GL0070473;4-7_GL0087480;Group2-1A_GL0028415;S-Fe17_GL0015509;S-Fe9_GL0171725	NA	NA	NA	NA	NA	NA	NA	15.5919	NA	NA	NA	14.2129	15.7067	NA	NA	NA	NA	NA	NA	NA	15.3106	NA	NA	NA
1-1_GL0030443;1-1_GL0083995;1-1_GL0092531;11_GL0014135;11_GL0025982;1A-dyr2-07_GL0027016;1A-dyr4-07_GL0045601;1A-dyr4-07_GL0110967;2-1_GL0011849;2-1_GL0021623;2-1_GL0047228;2-1_GL0102394;20_GL0139296;3-7_GL0070473;4-7_GL0087480;6-1_GL0068351;6-6_GL0074506;8-1_GL0006910;8-3_GL0022294;G1-1A_GL0008874;Group2-1A_GL0028415;Group2-2A_GL0084879;Group2-8A_GL0077290;Group2-8A_GL0206293;S-Fe17_GL0015509	17.9837	17.2517	17.3171	17.3397	18.9315	18.6665	19.3688	18.8093	18.6135	16.4612	18.2038	17.7356	19.1672	18.9186	19.2365	17.8854	17.8208	18.1662	19.2936	18.1843	19.2621	19.0767	17.7382	17.3398
1-1_GL0030443;1-1_GL0083995;1-1_GL0092531;2-1_GL0021623;2-1_GL0047228;2-1_GL0102394;2-3_GL0062049;6-2_GL0046991;7-1_GL0012015;Group2-8A_GL0077290;MH-6-4_GL0175735	16.6279	14.9582	15.012	15.2746	16.868	15.7409	16.6114	15.2472	15.5525	13.2397	15.9756	15.8839	17.0743	16.9318	17.0892	15.7075	15.0883	15.1248	16.5524	16.6774	16.4907	15.7223	14.6471	14.8797
1-1_GL0030443;1-1_GL0092531;1A-dyr4-07_GL0110967	NA	NA	NA	NA	NA	NA	NA	NA	NA	NA	NA	10.6677	12.9207	NA	NA	NA	NA	NA	NA	NA	12.9233	NA	NA	NA
1-1_GL0030443;1-1_GL0092531;2-1_GL0102394;6-2_GL0046991	14.6767	13.8545	14.4707	14.0963	16.2077	15.6804	16.2496	14.0297	14.7438	13.1872	14.3184	11.8626	16.1463	16.2405	17.1575	14.6304	14.2265	14.6079	14.2152	13.5747	15.8059	13.7223	13.5168	14.5756
1-1_GL0030452	NA	11.4339	11.5976	11.0579	11.2588	11.9505	12.1266	NA	12.5997	NA	NA	NA	NA	11.1951	11.4707	11.2716	12.3096	12.4096	13.1049	NA	12.3733	NA	NA	NA
1-1_GL0030452;1-1_GL0091757;1-2_GL0008053;4-1_GL0026029;7_GL0068824;Group2-8A_GL0041768;MC-6-2_GL0038561	10.1238	11.6312	11.4759	11.0541	12.7862	12.6535	12.7872	NA	11.8277	10.0925	12.8446	10.2969	13.2085	12.9555	12.6814	11.8624	13.0539	12.1113	14.0048	11.8522	13.1654	11.7672	NA	10.3959
1-1_GL0030452;1-1_GL0091757;2-1_GL0028796;4-1_GL0047515;4-5_GL0110282;5-4_GL0037331;7-1_GL0005029;7_GL0068824;Group2-2A_GL0001884;Group2-8A_GL0041768;MC-6-2_GL0018649;MC-6-2_GL0038561;S-Fe8_GL0084454	NA	NA	NA	NA	NA	14.1111	NA	13.2533	14.0373	NA	NA	13.4447	NA	NA	NA	NA	NA	NA	NA	NA	NA	14.0512	NA	NA
1-1_GL0030908	14.0886	13.7793	14.5905	13.9892	12.8956	12.9048	11.9815	13.9761	13.6557	11.4111	14.5847	13.3529	12.5933	13.0174	13.1156	NA	13.1665	NA	14.3383	13.7908	NA	13.654	12.2191	NA
1-1_GL0030908;MC-0-1_GL0054819;MC-6-3_GL0095560;S-Fe15_GL0060535	12.3474	13.1805	12.4629	12.1658	10.9297	11.7772	9.9166	12.5637	11.3929	10.953	12.5446	NA	10.4311	11.1646	12.2463	NA	11.4385	9.89753	12.8126	11.1354	11.0405	13.0606	12.3413	10.3553
1-1_GL0031225	15.2104	15.0579	13.6197	15.141	14.4589	13.3521	14.7957	14.4209	13.8981	13.6229	17.0274	16.564	15.3029	14.5151	16.0588	15.3373	13.8848	13.8549	16.1774	15.0877	16.4698	14.5137	NA	15.2801
1-1_GL0031225;1-1_GL0046107	NA	NA	NA	NA	NA	NA	NA	NA	NA	NA	NA	NA	NA	NA	NA	NA	NA	NA	15.7313	NA	NA	NA	NA	NA
1-1_GL0031225;1-1_GL0046107;1-2_GL0113170;11_GL0010650;14_GL0024258;1A-dyr2-07_GL0046703;1A-dyr2-07_GL0068616;2-1_GL0003289;2-1_GL0039511;2-1_GL0071086;2-4_GL0102869;20_GL0090419;4-1_GL0012891;4-1_GL0019852;4-1_GL0082413;4-2_GL0102076;5-1_GL0023968;5-7_GL0067986;52_GL0025897;6-1_GL0082357;G1-5A_GL0020141;G1-5A_GL0154592;Group2-8A_GL0037214;MC-0-3_GL0086469;S-Fe2_GL0121794;S-Fe2_GL0132020	16.5597	15.0933	16.286	15.3828	17.3468	17.0997	17.1742	NA	NA	15.9411	16.8611	18.2808	NA	17.4035	17.379	16.9915	17.0116	16.8613	17.1365	17.0716	15.5055	16.7658	NA	16.2886
1-1_GL0031225;1-1_GL0046107;1-2_GL0113170;11_GL0010650;14_GL0024258;1A-dyr2-07_GL0068616;2-1_GL0003289;2-4_GL0102869;4-1_GL0019852;4-1_GL0082413;5-1_GL0023968;5-7_GL0067986;52_GL0025897;G1-5A_GL0020141;G1-5A_GL0154592;Group2-8A_GL0037214;MC-0-3_GL0086469;S-Fe2_GL0121794;S-Fe2_GL0132020	13.1796	12.4418	13.5687	13.5021	16.0024	16.1052	16.0339	15.0244	14.8012	12.8343	15.2688	15.2684	16.5399	16.2142	15.813	15.2783	14.3087	15.3135	16.0282	15.5287	16.2678	15.301	15.4559	14.4809
1-1_GL0031225;1-1_GL0046107;1-2_GL0113170;11_GL0010650;14_GL0024258;2-1_GL0003289;20_GL0090419;4-1_GL0012891;4-1_GL0082413;47_GL0090201;5-7_GL0067986;6-1_GL0082357;G1-5A_GL0154592;MC-0-3_GL0086469;S-Fe2_GL0121794;S-Fe2_GL0132020	15.6868	14.9107	16.4545	14.7517	15.8775	15.985	15.9238	NA	NA	14.7612	15.9412	NA	NA	16.279	16.3922	16.2599	17.571	15.9197	15.4229	15.4985	NA	16.0762	NA	16.2124
1-1_GL0031225;1-1_GL0046107;1-2_GL0113170;11_GL0010650;14_GL0024258;4-1_GL0012891;5-7_GL0067986;G1-5A_GL0154592;S-Fe2_GL0121794	NA	NA	NA	NA	13.2321	13.4843	14.0041	NA	NA	NA	NA	12.6319	13.1362	12.9907	13.7135	NA	NA	11.8538	12.4661	11.4327	13.2129	12.8023	12.7022	NA
1-1_GL0031225;1-1_GL0046107;1-2_GL0113170;11_GL0010650;2-1_GL0003289;2-1_GL0039511;4-1_GL0082413;5-7_GL0067986;52_GL0025897;6-1_GL0082357;G1-5A_GL0020141;MC-0-3_GL0086469;S-Fe2_GL0121794	13.9404	13.4922	15.5372	14.0245	16.4761	16.0848	15.7333	15.2365	15.1059	13.9842	14.917	15.4055	15.7071	16.4005	15.461	15.8469	15.3556	15.5199	15.5623	15.6569	15.639	15.2916	15.8939	14.6852
1-1_GL0031225;1-1_GL0046107;1-2_GL0113170;11_GL0010650;2-1_GL0003289;2-1_GL0071086;2-4_GL0102869;20_GL0090419;4-1_GL0012891;4-1_GL0019852;4-1_GL0082413;4-2_GL0102076;47_GL0090201;5-1_GL0023968;5-7_GL0067986;52_GL0025897;6-1_GL0082357;G1-5A_GL0020141;G1-5A_GL0154592;Group2-8A_GL0037214;MC-0-3_GL0086469;S-Fe2_GL0132020	19.2304	NA	NA	NA	NA	NA	NA	NA	NA	17.8865	NA	NA	NA	NA	NA	NA	NA	NA	NA	NA	NA	NA	NA	NA
1-1_GL0031225;1-1_GL0046107;1-2_GL0113170;2-1_GL0003289;4-1_GL0082413;6-1_GL0082357;G1-5A_GL0020141;MC-0-3_GL0086469	15.9673	14.3352	15.0188	15.0671	17.2658	16.0873	16.9451	15.3808	16.2822	14.0241	16.4097	13.4696	16.2041	17.4658	16.5707	15.8776	16.0842	16.0574	16.8483	16.8637	17.2289	14.4867	15.6877	14.666
1-1_GL0031225;1-1_GL0046107;1A-dyr2-07_GL0046703;2-1_GL0071086;4-1_GL0019852;4-2_GL0102076;47_GL0090201;Group2-8A_GL0037214	12.8253	10.7986	11.5965	12.228	14.5618	14.1764	14.2344	12.858	12.5992	11.3501	12.7525	12.9402	15.0122	14.4984	12.5135	12.1273	13.4151	12.5679	14.9822	14.0275	14.6441	13.3657	12.4209	12.2201
1-1_GL0031225;1-1_GL0046107;4-1_GL0019852;Group2-8A_GL0037214	14.4251	14.2708	14.3195	15.114	15.3267	15.4388	13.5302	14.0789	14.7985	12.1432	14.9588	12.0078	15.9217	15.2543	15.0716	14.1054	14.9349	14.7269	16.7514	14.3469	15.9817	14.8176	14.1054	13.004
1-1_GL0031226	13.2303	13.5749	13.915	14.7	15.004	15.5629	14.9233	NA	15.341	12.4624	14.4264	14.0006	15.6689	15.3082	14.3333	14.1676	15.0509	14.3468	15.9346	14.1646	17.1452	13.0037	NA	13.6528
1-1_GL0031226;1-1_GL0051357;1-2_GL0062480;1-2_GL0082121;1-2_GL0113171;1-3_GL0088824;1A-dyr2-07_GL0068617;1A-dyr4-07_GL0106171;2-1_GL0009700;2-1_GL0024477;2-3_GL0019987;2-7_GL0037264;20_GL0075489;20_GL0138757;4-1_GL0012892;4-8_GL0033484;5-1_GL0003077;6-2_GL0022431;6-7_GL0119670;7-5_GL0130962;8-7_GL0038526;G1-3A_GL0068069;Group2-3A_GL0099690;Group2-8A_GL0147431;MC-0-1_GL0054221;MH-6-4_GL0065481;S-F…	18.4722	17.1335	18.6555	17.4089	19.4901	19.677	19.2813	19.2243	19.2401	16.729	18.6179	18.0017	19.9167	19.6145	19.1283	18.6172	17.6686	18.4626	19.8591	18.7406	19.2957	19.2968	17.8719	16.5516
1-1_GL0031226;1-1_GL0051357;1-2_GL0113171;1-3_GL0088824;1A-dyr2-07_GL0068617;2-3_GL0019987;4-1_GL0012892;4-8_GL0033484;6-2_GL0022431;7-5_GL0130962;8-7_GL0038526;MC-0-1_GL0054221	12.2929	11.0562	11.4965	11.8542	13.8933	14.0191	13.6376	13.3755	13.2273	10.9666	12.2279	12.3788	14.5932	13.7312	13.7984	11.1279	12.7076	12.9126	13.8756	12.9679	13.8117	12.431	13.0543	12.1833
1-1_GL0031226;1-1_GL0051357;1-2_GL0113171;1-3_GL0088824;2-1_GL0009700;2-1_GL0024477;2-3_GL0019987;20_GL0138757;4-8_GL0033484;5-1_GL0003077;6-2_GL0022431;6-3_GL0101429;8-7_GL0038526;MC-0-1_GL0054221	15.2492	14.2628	14.1684	14.6196	17.4484	16.5656	16.8706	15.9695	15.7795	14.4972	15.8655	16.1178	17.6277	17.5561	14.3078	15.4588	16.4233	14.8925	16.5803	16.3854	17.3346	14.7634	14.9489	15.1159
1-1_GL0031226;1-1_GL0051357;1-2_GL0113171;1-3_GL0088824;2-1_GL0024477;4-8_GL0033484;5-1_GL0003077;6-2_GL0022431;MC-0-1_GL0054221	15.2204	15.1645	15.5028	13.4717	18.3522	17.3318	17.1412	16.7535	17.7538	15.1785	16.2716	16.4836	18.0615	18.3025	18.2041	15.891	16.4575	17.038	18.1098	17.5123	17.4917	15.8768	16.8031	15.1339
1-1_GL0031226;1-1_GL0051357;1-3_GL0088824;1A-dyr2-07_GL0068617;2-1_GL0009700;2-1_GL0024477;2-3_GL0019987;20_GL0138757;5-1_GL0003077;8-7_GL0038526	13.5337	NA	NA	NA	13.5267	12.6355	14.469	NA	12.6078	12.1083	12.3962	11.8027	15.4076	12.9287	13.5907	11.5656	11.7028	11.754	14.6481	14.049	14.4535	12.0687	12.4873	11.5862
1-1_GL0031226;1-1_GL0051357;6-2_GL0022431	14.3406	13.8926	13.6855	14.4133	16.36	16.5694	15.502	14.603	16.0471	14.3297	15.9524	14.7872	16.3448	16.3602	15.7872	14.4365	14.9719	14.888	16.7761	15.6747	16.6876	15.0944	13.8837	13.7049
1-1_GL0031226;1-2_GL0062480;1A-dyr4-07_GL0106171;6-2_GL0022431;6-7_GL0119670	16.8348	15.1662	15.2388	15.8995	17.4073	17.9606	17.5331	NA	17.2369	15.3326	16.8917	NA	17.2569	17.4699	17.2951	17.2178	16.1716	16.8763	17.7221	16.6247	NA	17.9244	15.9363	15.6487
1-1_GL0031226;1-2_GL0113171;20_GL0138757;4-1_GL0012892;4-8_GL0033484;5-1_GL0003077;7-5_GL0130962;G1-3A_GL0068069;Group2-8A_GL0147431	13.3728	NA	13.5327	NA	15.3611	15.1603	15.5396	15.0569	15.0267	13.2943	NA	15.067	15.769	15.2632	NA	NA	14.3806	14.0623	14.76	14.9996	15.882	13.8952	15.2556	NA
1-1_GL0031226;1A-dyr2-07_GL0068617	NA	NA	NA	NA	11.4474	12.9693	12.2558	NA	NA	NA	11.8075	NA	11.5879	11.555	11.9073	NA	NA	11.3643	12.3188	NA	11.8967	NA	NA	NA
1-1_GL0031226;20_GL0138757;5-1_GL0003077	13.8818	NA	NA	15.5632	15.7661	16.5292	15.4287	NA	15.4693	13.3794	14.2332	NA	NA	NA	15.5662	14.9974	NA	15.3476	16.4885	14.0267	18.0015	NA	14.8712	14.495
1-1_GL0031226;2-1_GL0009700;2-1_GL0024477;20_GL0138757;5-1_GL0003077	13.2162	12.9235	NA	NA	14.1827	13.2811	13.6273	14.3894	14.5005	11.6086	13.342	12.7987	14.1115	15.0627	13.3553	13.4636	12.8863	NA	14.0936	13.5302	13.2708	NA	NA	NA
1-1_GL0031226;2-1_GL0024477;20_GL0138757	15.7353	11.7296	13.7775	13.559	16.2711	14.563	16.5992	13.2652	13.8328	12.6522	15.4971	15.2088	15.4347	16.0018	16.265	14.3999	13.5515	14.191	15.9091	16.3623	15.2826	14.0003	13.3861	14.1583
1-1_GL0031226;5-1_GL0003077;6-2_GL0022431;6-7_GL0119670	12.2371	12.6765	12.4747	13.5109	15.7871	15.3563	14.6889	14.718	14.3401	11.7982	13.9538	13.3673	16.0958	15.2644	15.4149	14.6108	13.3982	14.1325	15.8949	14.2532	16.4208	14.7574	14.1812	13.0698
1-1_GL0031226;6-7_GL0119670	13.325	13.616	13.0761	14.2605	15.7554	16.0348	13.5244	14.5569	14.0967	NA	14.1024	13.499	16.1019	15.0404	14.7972	15.079	14.0537	13.6832	15.3405	NA	15.7598	16.4513	14.2114	15.0756
1-1_GL0031255;10_GL0065662;16_GL0087443;1A-dyr1-07_GL0007946;1A-dyr3-06_GL0012636;31_GL0038728;34_GL0023746;G1-1A_GL0076432;MC-0-1_GL0020550;MC-0-3_GL0013230;MC-0-3_GL0015458;S-Fe10_GL0112851;S-Fe9_GL0179822	15.01	16.379	15.9221	15.7052	15.5546	15.0588	12.5494	NA	14.6148	12.6057	15.4061	13.8698	16.5466	15.2654	16.3056	14.1919	NA	14.1647	16.1966	NA	15.7715	16.1574	15.4723	12.722
1-1_GL0031255;1-1_GL0141637;10_GL0065662;16_GL0087443;1A-dyr1-07_GL0007946;1A-dyr3-06_GL0012636;3-1_GL0019714;31_GL0038728;34_GL0023746;G1-1A_GL0052859;G1-1A_GL0076432;MC-0-1_GL0020550;MC-0-3_GL0015458;S-Fe10_GL0112851;S-Fe9_GL0179822	15.3068	16.4152	15.4084	15.0488	15.2418	14.1869	13.1889	NA	14.5661	NA	16.2694	NA	16.0488	15.1761	15.7688	NA	14.0347	13.8511	16.1179	15.0299	15.3068	16.4449	NA	NA
1-1_GL0031255;1-1_GL0141637;10_GL0065662;16_GL0087443;1A-dyr1-07_GL0007946;3-1_GL0019714;31_GL0038728;G1-1A_GL0076432;MC-0-1_GL0020550;S-Fe10_GL0112851	12.7412	14.2131	13.4987	13.6201	12.515	11.5058	9.17612	NA	NA	NA	13.6545	NA	14.7279	12.7562	13.4158	11.051	NA	9.89998	13.8139	12.6797	13.2218	13.4564	NA	NA
1-1_GL0031255;16_GL0087443;1A-dyr3-06_GL0012636;34_GL0023746;MC-0-3_GL0015458;S-Fe10_GL0112851;S-Fe9_GL0179822	14.9845	17.0536	16.6515	16.8917	15.5283	14.0957	11.9535	14.3664	14.6887	NA	15.6227	NA	17.0257	15.5559	16.463	14.3619	14.334	12.8224	16.0433	14.7423	15.7232	16.5073	14.41	NA
1-1_GL0031369;1A-dyr4-07_GL0112723;3-3_GL0026476;G1-7A_GL0044869;Group2-7A_GL0019026	NA	NA	NA	NA	12.5839	13.6718	12.6229	13.952	13.429	11.4327	12.7811	11.4625	12.8169	12.7174	13.0213	12.3142	12.8138	12.6236	12.7784	12.1157	11.7863	13.1203	11.5941	11.761
1-1_GL0031369;1A-dyr4-07_GL0112723;3-3_GL0026476;G1-7A_GL0044869;Group2-7A_GL0019026;S-Fe8_GL0168562	13.7765	13.8461	13.5301	14.1225	14.9788	15.3417	14.2471	14.5722	14.469	13.3999	14.5029	13.7214	15.2166	14.9878	14.9944	14.2476	13.3733	13.867	14.6034	14.3325	14.8928	14.7681	12.2485	13.8836
1-1_GL0031369;1A-dyr4-07_GL0112723;3-3_GL0026476;G1-7A_GL0044869;S-Fe8_GL0168562	12.4844	13.3188	NA	13.0395	13.6128	13.831	13.3679	13.4136	13.6267	12.6817	13.5381	12.9899	14.3344	13.5547	13.7569	13.6418	12.2085	13.0839	13.5922	13.5675	14.1923	13.5677	11.8635	12.4395
1-1_GL0031369;1A-dyr4-07_GL0112723;3-3_GL0026476;Group2-7A_GL0019026	14.6325	14.481	13.9506	15.1039	16.0224	16.5825	16.0175	15.6688	16.088	14.7961	15.8102	14.747	16.0267	15.9845	16.3424	15.7491	15.4982	15.4583	15.7517	15.22	16.0824	15.8649	14.6528	15.1788
1-1_GL0031369;3-3_GL0026476	12.0118	11.9019	11.2515	12.6072	13.5537	14.4841	13.7487	13.6452	13.7708	12.7917	13.5157	13.0059	12.9656	13.6169	13.463	12.3224	13.819	12.9358	13.6983	12.0613	11.9538	12.5247	11.6563	12.9998
1-1_GL0031369;3-3_GL0026476;S-Fe8_GL0168562	NA	NA	NA	NA	11.4773	12.9309	10.5072	11.7677	11.0236	NA	NA	9.74791	12.2614	11.3024	11.988	10.6122	11.5875	NA	11.2949	NA	11.0711	9.9108	10.8819	10.378
1-1_GL0031369;Group2-7A_GL0019026	NA	NA	NA	11.6519	12.4213	13.8162	12.3341	NA	13.012	11.6491	11.9704	NA	12.2272	12.4969	12.9484	12.7272	12.6502	12.3316	12.7537	NA	NA	13.0048	11.6637	12.0988
1-1_GL0031879;1-1_GL0034633;14_GL0137105;2A-dyr14-07_GL0043773;4-7_GL0019478;7-4_GL0117481;7-5_GL0150318;G1-3A_GL0097750;Group2-2A_GL0085143	18.2478	18.8691	18.4962	19.1059	18.6617	18.5937	17.3254	17.1887	18.6923	16.3552	18.841	17.078	19.9955	18.672	18.922	17.4869	17.054	16.7154	19.4767	17.9367	19.1668	19.5003	17.2541	15.4402
1-1_GL0031879;G1-3A_GL0097750	NA	10.4688	11.8265	NA	11.3145	NA	NA	NA	11.9896	NA	NA	NA	NA	NA	13.0157	NA	NA	NA	NA	NA	NA	NA	NA	NA
11_GL0031897	13.4165	12.9715	12.0745	12.6168	14.21	15.259	NA	13.2587	13.4985	NA	13.5236	NA	13.3175	14.4522	12.9516	13.6382	10.6504	NA	15.1645	12.0515	13.6616	17.136	12.5604	NA
11_GL0031897;1A-dyr4-07_GL0106169;2-8_GL0071465;6-3_GL0036745;G1-5A_GL0096650;Group2-1A_GL0059524	NA	NA	NA	NA	NA	NA	NA	NA	NA	NA	NA	NA	NA	NA	11.2122	NA	NA	NA	NA	NA	NA	NA	NA	9.90787
11_GL0031897;1A-dyr4-07_GL0106169;6-3_GL0036745;G1-5A_GL0096650;Group2-1A_GL0059524	13.4679	12.6723	12.4686	12.028	13.6691	14.2434	NA	12.5357	12.9178	11.965	13.5537	NA	13.4059	13.5344	13.8302	13.105	12.2625	NA	14.6355	12.8051	14.1961	16.2988	12.3864	12.9045
11_GL0031897;6-3_GL0036745;G1-5A_GL0096650;Group2-1A_GL0059524	15.5552	14.1214	13.2253	13.4904	15.1173	16.2427	NA	14.0733	14.2161	13.7656	14.1612	NA	14.9612	15.1279	14.1839	14.748	12.9013	14.8499	16.3572	14.7096	16.1924	18.264	13.9075	15.2755
11_GL0031901	15.4082	15.0171	13.8472	14.8948	16.0576	17.4869	14.689	15.3991	13.3402	13.9721	15.2915	12.5283	15.4996	15.6096	14.7189	15.979	13.9637	14.3	15.8707	14.0184	16.2377	18.1196	15.1707	10.9584
11_GL0031901;4-1_GL0012896;7-5_GL0152823;G1-3A_GL0068072;Group2-8A_GL0019730;S-Fe2_GL0121797	NA	NA	NA	NA	NA	NA	NA	11.6636	NA	NA	NA	NA	NA	NA	NA	NA	NA	NA	NA	NA	NA	NA	NA	NA
11_GL0031901;4-7_GL0103994;7-5_GL0152823;S-Fe2_GL0121797;S-Fe7_GL0198557	NA	NA	NA	NA	NA	NA	NA	12.7556	NA	NA	NA	NA	12.6518	NA	NA	NA	NA	NA	NA	NA	12.7552	NA	NA	NA
11_GL0031901;7-5_GL0152823	15.32	15.4218	15.1364	15.5503	16.2102	17.7636	13.5746	16.6312	15.1136	15.583	15.7275	13.669	16.101	16.2865	15.1277	16.7049	14.5019	15.2903	16.3901	15.3937	16.5256	17.6407	15.5506	15.853
11_GL0032113	NA	NA	14.175	NA	14.3784	14.509	16.0462	14.2828	NA	NA	NA	NA	NA	14.4833	12.2144	15.6309	NA	13.9503	NA	13.4236	12.7773	NA	15.4904	NA
11_GL0032640	NA	NA	12.3876	NA	13.7672	15.8197	NA	NA	13.4527	13.9301	NA	NA	NA	13.9446	NA	NA	NA	NA	NA	NA	NA	NA	NA	NA
11_GL0032668;4-8_GL0022628	11.4337	12.6431	11.1261	11.9732	12.1349	13.5534	13.6071	12.9424	12.2116	13.5822	11.8776	11.7954	12.0184	12.0273	12.3608	13.0654	12.2604	11.8354	12.038	12.127	NA	12.3871	12.0049	11.9194
11_GL0033162	NA	NA	NA	10.5182	13.9648	13.6521	15.2727	14.3234	12.551	14.2545	NA	13.5425	13.4257	14.1984	11.6633	11.5207	13.3167	NA	12.8024	13.7552	14.5488	13.6078	12.5672	13.7871
1-1_GL0033364	12.3059	12.5053	12.1349	13.2744	13.9878	13.139	12.8658	13.355	12.1861	12.1346	11.8161	13.1223	13.7882	13.9402	13.4783	13.0239	13.4106	14.6026	13.3997	13.5096	11.8684	13.3402	13.5357	15.0195
1-1_GL0033364;38_GL0022899;6-6_GL0053070	NA	NA	NA	NA	10.5808	10.0348	NA	10.3039	NA	NA	NA	NA	10.1427	10.7451	10.3119	NA	10.2769	10.7299	9.63747	NA	NA	NA	NA	NA
1-1_GL0033364;6-6_GL0053070;G1-1A_GL0017043	NA	NA	NA	10.3353	12.9527	11.8338	13.378	12.1448	12.7692	11.5745	NA	NA	11.3951	12.9907	11.239	NA	10.9606	11.9427	10.4203	NA	12.9396	10.9115	NA	11.6093
1-1_GL0033364;G1-1A_GL0017043	NA	NA	NA	NA	NA	NA	NA	11.7809	NA	NA	NA	NA	11.65	NA	NA	NA	NA	NA	NA	NA	NA	NA	NA	NA
11_GL0033535	NA	13.4567	NA	13.6871	14.6373	15.2417	NA	NA	NA	NA	NA	NA	NA	NA	14.7178	13.183	13.5292	NA	15.0871	NA	15.6058	16.7037	NA	14.2745
11_GL0033854	NA	NA	NA	15.0031	15.6944	14.5623	NA	NA	NA	NA	NA	NA	15.7622	15.4878	15.0517	14.8443	16.6596	12.5973	14.4992	NA	17.3536	14.9048	16.2022	13.9348
11_GL0033854;4-7_GL0055421;5-7_GL0002148	15.332	14.3725	15.0324	15.0798	18.418	15.4721	17.3036	18.0602	17.4102	16.6711	16.6237	NA	15.9906	18.377	16.4544	16.4526	18.8461	17.6101	16.5496	NA	17.9069	15.8725	NA	13.5112
1-1_GL0034633;4-7_GL0019478;7-4_GL0117481;7-5_GL0150318;G1-3A_GL0097750	11.9434	10.427	NA	NA	12.1077	11.3271	12.0019	NA	11.5506	NA	11.7842	11.6483	13.6864	12.295	12.2696	11.354	NA	11.0207	13.206	12.0106	12.4282	11.615	NA	NA
11_GL0034650;11_GL0111616	12.7384	14.2146	NA	12.6527	NA	NA	11.6736	13.4776	10.1618	NA	13.323	13.3115	12.607	NA	NA	11.878	13.0721	NA	13.1457	12.7523	12.2991	10.5236	13.8697	12.1968
1-1_GL0034657	NA	11.9774	NA	11.7218	10.7365	12.9984	11.0712	NA	11.2758	11.2972	10.6875	NA	NA	NA	10.9209	NA	NA	12.271	NA	11.8285	11.8215	13.8787	NA	NA
1-1_GL0034657;8-1_GL0066574;8-5_GL0024395;G1-5A_GL0086631;MC-0-1_GL0074098;MH-6-1_GL0045244;MH-6-1_GL0118148;S-Fe20_GL0053310;S-Fe2_GL0210641;S-Fe8_GL0008502	15.4004	14.9955	13.7475	14.6526	16.4684	16.636	15.9483	15.5912	15.7466	14.63	14.7201	16.1667	15.2316	16.4581	16.6537	14.3645	14.9722	16.7097	16.0802	15.9173	17.3812	17.2748	14.7252	16.443
1-1_GL0034657;8-1_GL0066574;8-5_GL0024395;G1-5A_GL0086631;MC-0-1_GL0074098;MH-6-1_GL0118148;S-Fe20_GL0053310;S-Fe8_GL0008502	NA	NA	NA	11.6502	12.97	12.1838	11.5101	11.7589	12.1496	NA	NA	11.3181	12.1246	13.0529	11.9884	12.076	13.4342	NA	11.5987	NA	12.7261	12.3952	11.0914	11.2926
1-1_GL0034657;8-1_GL0066574;8-5_GL0024395;MC-0-1_GL0074098;MH-6-1_GL0118148;S-Fe2_GL0210641;S-Fe8_GL0008502	NA	NA	NA	NA	NA	NA	NA	12.1397	NA	NA	NA	12.2224	NA	NA	NA	NA	NA	NA	NA	NA	NA	NA	NA	NA
1-1_GL0034889	14.1649	NA	NA	14.6705	NA	NA	NA	NA	NA	NA	NA	NA	NA	NA	NA	13.821	NA	NA	NA	NA	NA	NA	NA	NA
1-1_GL0035152	NA	11.7233	NA	12.3606	NA	NA	NA	NA	NA	NA	NA	NA	NA	NA	14.6282	11.7217	NA	NA	NA	NA	11.8844	NA	NA	NA
1-1_GL0035152;2-1_GL0006992;2-1_GL0081025;2-8_GL0046229;5-3_GL0092959	14.6098	13.9726	14.0124	14.3437	15.8546	14.3022	15.2598	13.2113	14.1562	12.1044	15.1717	14.6316	14.9563	15.5823	16.7742	14.192	13.9491	14.0631	16.1075	14.8715	15.3336	13.0386	12.9991	13.2262
1-1_GL0035152;2-1_GL0029304	NA	NA	NA	12.3598	12.5689	NA	NA	NA	11.937	11.4379	13.4477	11.1787	13.1505	12.9705	12.9506	12.3699	12.5812	12.2111	13.8637	12.5329	12.9292	11.9839	NA	13.1004
1-1_GL0036243;1-1_GL0103334;10_GL0023724;2-1_GL0037499;2-1_GL0047729;2-1_GL0100791;34_GL0006378;4-8_GL0123903;5_GL0126821;7-1_GL0075240;7-2_GL0037805;8-1_GL0013599;G1-5A_GL0147092	17.085	15.9178	15.8246	16.2204	17.741	17.6217	18.631	17.4772	17.4156	16.1889	17.7637	17.3285	17.6597	17.887	18.087	17.1123	17.0772	17.1271	18.2299	17.4205	17.5594	17.7208	17.083	17.0559
1-1_GL0036243;1-1_GL0103334;10_GL0023724;2-1_GL0037499;2-1_GL0047729;2-1_GL0100791;34_GL0006378;5-1_GL0037454;5_GL0126821;6-2_GL0062533;7-1_GL0075240;G1-5A_GL0147092	NA	NA	NA	NA	NA	NA	NA	NA	14.5387	NA	NA	NA	13.8794	NA	NA	NA	NA	NA	NA	NA	NA	NA	NA	NA
1-1_GL0036243;1-1_GL0103334;10_GL0023724;2-1_GL0047729;2-1_GL0100791;34_GL0006378;6-2_GL0062533;G1-5A_GL0147092	14.7717	NA	NA	11.5023	14.767	13.9146	14.9217	12.2654	13.5592	NA	13.7977	14.6474	13.4889	14.6583	14.6861	13.2682	13.7285	13.0206	14.9605	14.4354	14.4164	12.6439	14.0457	13.4359
1-1_GL0036243;2-1_GL0047729;34_GL0006378	11.4599	NA	NA	NA	NA	10.0247	NA	NA	NA	NA	NA	NA	NA	NA	NA	NA	NA	NA	12.1206	10.9629	NA	NA	NA	NA
1-1_GL0036243;34_GL0006378	NA	NA	NA	NA	NA	11.8119	11.5929	NA	NA	NA	NA	NA	NA	11.643	NA	10.4983	NA	11.7252	12.1612	NA	12.0723	NA	NA	NA
1-1_GL0036247	12.2599	13.312	15.2718	12.0561	14.2395	15.9667	12.2279	15.4644	15.7751	13.9011	14.4062	11.1932	13.4813	14.3719	13.3667	12.6082	16.664	15.0285	15.5851	13.824	14.0642	NA	11.2834	14.3472
1-1_GL0036247;2-1_GL0032713;4-1_GL0040084;7-1_GL0048475	14.2078	14.6715	15.4212	14.6649	15.9104	15.9188	16.0828	15.8995	16.0954	15.2799	15.823	15.714	15.1235	15.992	15.1797	15.3297	16.4333	15.9933	16.1248	15.5779	15.1302	14.5633	15.0507	15.8671
11_GL0037479;S-Fe7_GL0276527	15.0245	14.6152	13.59	13.9327	15.8193	17.6811	17.021	15.7697	15.0824	16.2857	14.6808	15.0821	15.821	15.8387	16.2942	16.0985	14.4896	16.0108	15.9902	16.003	16.754	17.941	16.638	14.6619
1-1_GL0037621;3-3_GL0073627;7-5_GL0007445;8-5_GL0087398;MH-6-5_GL0108824;S-Fe20_GL0046866	NA	NA	10.4273	NA	NA	NA	NA	NA	NA	NA	NA	NA	13.3527	NA	12.5354	10.3705	NA	NA	12.5298	NA	12.3299	11.8327	NA	NA
1-1_GL0037958	NA	11.8385	NA	12.2805	12.3165	11.4738	10.8608	13.0008	NA	NA	12.4125	NA	12.7899	NA	11.9436	NA	12.0339	12.0668	12.8175	NA	NA	11.8631	11.0129	NA
1-1_GL0037958;1-1_GL0054161;1-1_GL0073107;1-2_GL0095419;1-2_GL0115428;1-7_GL0113738;11_GL0021701;11_GL0066347;11_GL0139318;1A-dyr4-07_GL0083013;1A-dyr4-07_GL0090469;2-1_GL0033349;2-1_GL0112186;2-3_GL0105804;23_GL0012977;2A-dyr16-07_GL0057446;32_GL0088143;38_GL0043757;4-1_GL0013487;4-1_GL0023341;4-1_GL0057479;4-2_GL0077478;4-8_GL0028110;46_GL0035035;5-8_GL0048195;50_GL0015409;6-2_GL0055252;6-3_GL0…	11.8432	NA	13.4204	13.9733	15.5702	14.8125	14.204	16.4771	12.7708	NA	NA	NA	14.5121	14.9514	13.9392	14.8329	14.3591	13.8589	14.8802	NA	13.7215	14.5364	12.2931	14.1093
1-1_GL0037958;16_GL0103773	NA	NA	NA	NA	10.5574	NA	NA	11.2688	NA	NA	NA	NA	NA	11.119	10.1516	NA	10.6054	NA	NA	NA	NA	NA	NA	NA
1-1_GL0037958;16_GL0103773;23_GL0097013;G1-1A_GL0049582;MC-0-1_GL0010773;MC-0-1_GL0078736;MC-0-3_GL0011860;MH-6-1_GL0004420;S-Fe10_GL0038852;S-Fe10_GL0095140;S-Fe2_GL0120413	14.4696	14.5562	15.1562	14.3407	NA	14.3977	12.7532	14.2566	14.7488	12.8182	14.8497	13.152	14.9975	NA	NA	13.07	NA	NA	14.2896	13.3562	13.91	13.816	NA	12.7673
1-1_GL0037958;16_GL0103773;23_GL0097013;G1-1A_GL0049582;MC-0-1_GL0010773;MC-0-1_GL0078736;MH-6-1_GL0004420;S-Fe10_GL0038852;S-Fe10_GL0095140;S-Fe2_GL0120413	16.5922	17.6168	17.1797	17.2119	16.8117	16.5998	15.2161	16.6224	16.6857	15.7453	17.8284	14.9608	17.8025	16.6113	17.2689	15.3782	16.4967	15.6904	17.4846	16.3233	16.0072	16.5955	16.0249	14.0297
1-1_GL0037958;MC-0-1_GL0078736	11.9161	14.4138	12.3224	14.2255	13.4957	13.4426	12.5125	14.9836	14.1813	13.6395	14.287	13.6061	13.4908	13.3947	12.2558	13.2116	14.0218	13.4955	13.8874	13.4019	11.8707	12.0067	12.9734	13.213
1-1_GL0037958;MC-0-1_GL0078736;S-Fe10_GL0095140	13.9569	15.2188	14.1105	15.5701	15.0266	15.4339	14.0419	16.1934	15.3226	15.2495	15.3884	14.3636	15.1918	15.1395	14.735	14.3349	15.6329	14.4372	15.1814	14.3601	14.5232	13.9663	14.5409	14.181
1-1_GL0038122;11_GL0031471;MH-0-4_GL0007045;S-Fe10_GL0069592;S-Fe3_GL0151416	12.7288	13.7736	13.6837	15.0999	13.7574	13.7761	11.474	12.7435	12.3832	11.6739	13.754	11.8993	14.5497	13.8674	13.0157	12.6809	11.9939	11.4894	14.2522	13.0677	12.6794	13.4777	11.4666	10.8321
1-1_GL0038124	14.0484	16.3003	14.5787	16.9055	14.9429	16.1907	14.8048	15.1903	14.3323	15.1526	14.965	14.7378	15.2108	14.9933	13.8423	13.9946	14.8286	14.6778	15.0466	14.7269	14.964	14.6523	14.4177	14.5036
1-1_GL0038124;23_GL0083604;MC-0-1_GL0025932;S-Fe10_GL0069594	NA	14.7984	14.7065	15.7436	14.2847	14.1016	NA	NA	NA	14.9112	13.6621	NA	13.8359	14.3508	NA	12.6541	12.1321	13.9038	12.9013	11.4359	NA	13.9311	NA	10.8517
1-1_GL0038124;MC-0-1_GL0025932	13.4273	16.026	14.2608	16.5192	14.7493	14.8752	12.2072	13.9082	13.926	12.7914	15.1917	12.7856	15.928	14.784	13.9248	11.9799	12.9726	12.4857	15.9717	14.787	14.2952	14.3848	NA	11.6388
1-1_GL0038124;MC-0-1_GL0025932;S-Fe10_GL0069594	13.7604	15.4155	15.6316	16.9596	15.8705	16.0758	13.5317	15.1045	14.9473	14.6841	15.8922	14.2718	16.7753	15.7151	15.5465	14.1403	14.8185	14.1992	16.2715	14.3877	15.762	15.4081	14.1021	14.3634
1-1_GL0038351;11_GL0065633;17_GL0041626;17_GL0127899;1A-dyr2-07_GL0000594;1A-dyr4-07_GL0054230;2-1_GL0005243;2-3_GL0103226;2-8_GL0109886;20_GL0105798;28_GL0045891;2A-dyr13-07_GL0037479;3-3_GL0100994;4-1_GL0062101;4-1_GL0079690;4-3_GL0017430;4-7_GL0031314;4-7_GL0128250;5-4_GL0107661;5-7_GL0142112;5-8_GL0008035;5_GL0062237;6-1_GL0015324;6-2_GL0006001;6-4_GL0092622;7-8_GL0024939;8-1_GL0076341;8-2_GL…	17.1233	17.0661	17.5385	17.9717	19.0853	18.5782	19.5501	15.6716	21.6874	17.6064	18.6891	15.6009	18.4478	19.0955	19.604	18.1796	18.8659	18.5337	19.1367	18.0382	16.216	18.9413	21.7069	18.0917
1-1_GL0038351;1-1_GL0101438;1-1_GL0143497;17_GL0041626;1A-dyr2-07_GL0000594;1A-dyr4-07_GL0054230;2-1_GL0005243;2-1_GL0006967;2-1_GL0062493;2-3_GL0085873;2-3_GL0103226;2-8_GL0109886;20_GL0105798;25_GL0094012;2A-dyr13-07_GL0037479;3-3_GL0100994;4-1_GL0062101;4-1_GL0079690;4-3_GL0017430;4-7_GL0031314;4-7_GL0128250;5-2_GL0000467;5-2_GL0096356;5-3_GL0001944;5-6_GL0003735;5-8_GL0008035;6-2_GL0043237;6-…	18.9657	17.6373	18.5515	18.7542	20.2392	20.0918	20.9939	19.6718	19.8631	18.5332	19.5109	19.4639	19.7771	20.3734	20.4434	19.1322	19.9536	19.8777	20.2353	19.0978	19.7806	19.6873	19.3645	19.3983
1-1_GL0038351;1-1_GL0143497;17_GL0041626;1A-dyr2-07_GL0000594;1A-dyr4-07_GL0054230;2-1_GL0006967;2-1_GL0062493;2-3_GL0085873;2-8_GL0109886;20_GL0105798;25_GL0094012;28_GL0045891;2A-dyr13-07_GL0037479;38_GL0050779;4-1_GL0062101;4-3_GL0017430;4-7_GL0031314;4-7_GL0128250;5-2_GL0096356;5-6_GL0003735;5-8_GL0003525;5-8_GL0008035;6-1_GL0015324;6-2_GL0006001;6-2_GL0043237;6-6_GL0110889;8-2_GL0127477;G1-1…	NA	NA	NA	11.678	12.3245	NA	12.8208	12.2738	NA	NA	NA	NA	12.2275	12.5345	12.6531	11.2432	11.9372	12.402	12.1521	NA	11.9672	NA	NA	11.33
1-1_GL0038351;2-8_GL0109886;7-8_GL0114515;Group2-3A_GL0187614;MH-0-4_GL0013119;S-Fe20_GL0009979	NA	NA	NA	NA	11.7422	12.9391	12.5237	11.8547	NA	NA	11.5027	11.1275	NA	12.3933	NA	NA	12.1304	NA	12.6706	NA	NA	11.1435	NA	NA
1-1_GL0038351;3-3_GL0100994;5_GL0062237;8-1_GL0076341;MH-0-4_GL0013119	12.5652	11.9631	12.3448	11.7395	13.0642	12.2436	13.1422	NA	13.3072	NA	12.8865	NA	NA	13.3498	NA	NA	12.7866	NA	13.3293	NA	NA	NA	NA	NA
11_GL0038728	NA	NA	NA	NA	NA	NA	NA	NA	NA	NA	NA	NA	NA	NA	NA	NA	NA	NA	NA	12.4287	NA	NA	NA	NA
11_GL0038728;11_GL0131219	16.9672	16.2326	16.4024	15.8547	17.4696	17.6649	17.0909	17.2687	17.4028	16.2669	17.0214	16.417	16.948	17.4377	18.0479	17.2155	17.4261	17.6953	17.4894	16.8262	18.0398	18.4101	16.6897	17.2327
1-1_GL0039105	13.4826	13.2544	13.3094	13.2063	NA	12.3065	11.3137	13.8679	12.2976	NA	13.838	12.8538	12.028	NA	NA	NA	NA	NA	14.0346	13.7014	11.9569	13.2529	11.8533	NA
1-1_GL0039105;16_GL0089899;23_GL0074568;28_GL0032797;40_GL0054978;MC-0-1_GL0088483;MC-0-3_GL0016791;MC-6-1_GL0007984;MH-0-5_GL0025077;MH-0-5_GL0048697;S-Fe10_GL0092481;S-Fe12_GL0018251;S-Fe12_GL0191779	17.8378	18.847	18.2846	18.6489	17.9655	17.8848	16.1934	18.4715	17.4148	16.0995	18.6754	NA	18.7331	17.9888	18.4542	17.6262	17.6712	16.6238	18.4974	17.377	17.8867	18.2688	16.7741	16.2548
1-1_GL0039105;16_GL0089899;28_GL0032797;MC-0-1_GL0088483;MH-0-5_GL0025077;MH-0-5_GL0048697;S-Fe12_GL0018251;S-Fe12_GL0191779	15.858	16.943	15.9071	16.5607	15.6247	14.8687	13.5095	NA	15.215	13.9033	15.8118	15.2152	15.3125	15.6712	15.1835	14.4786	15.382	14.3912	15.7403	15.3694	15.1622	15.4813	15.664	13.8933
1-1_GL0039105;28_GL0032797;40_GL0054978;MC-0-1_GL0088483;MC-0-3_GL0016791;MH-0-5_GL0048697;S-Fe12_GL0018251;S-Fe12_GL0191779	16.7408	17.9574	17.7108	17.5817	16.1357	16.2269	14.2289	NA	16.2936	15.0172	17.4085	NA	NA	16.3175	16.5007	16.4026	16.5558	15.643	17.1197	16.3604	NA	17.1987	NA	14.5876
1-1_GL0039105;MC-0-1_GL0088483;S-Fe12_GL0191779	14.4885	15.3722	14.3968	15.124	12.9269	12.09	11.2412	13.8265	12.6661	9.6966	14.1678	12.8072	12.2096	13.139	13.4532	12.3799	13.1632	11.3158	14.0441	13.44	11.0043	13.139	13.2884	NA
1-1_GL0039242	13.7427	NA	14.3171	NA	14.8796	14.1113	15.066	13.4617	14.7407	13.5234	14.4002	12.8615	13.6136	14.9752	14.8327	12.1972	15.8207	13.1811	14.2049	12.5419	14.9216	NA	14.5302	12.4953
1-1_GL0039242;1-1_GL0064871	12.8838	NA	13.4684	NA	14.2794	NA	13.9492	NA	13.9601	13.0436	13.5815	12.0991	13.5165	14.2871	13.924	NA	14.8637	13.2909	13.3713	NA	14.2873	NA	14.1402	NA
1-1_GL0039242;MH-6-3_GL0024150	14.4924	12.9074	14.534	NA	15.8058	14.9691	15.9104	15.558	15.428	14.6947	14.693	14.3059	15.1991	16.0205	15.6919	14.6872	15.9188	15.3491	14.9385	14.2031	15.3469	13.3999	14.5471	13.5254
1-1_GL0039689	NA	NA	10.2587	NA	11.081	11.4264	NA	11.289	11.7472	NA	NA	NA	10.6164	10.5297	9.95804	NA	11.6913	11.247	11.9423	NA	11.0138	NA	NA	NA
1-1_GL0039698	NA	11.3216	10.6289	12.1977	12.2181	13.1531	NA	12.1589	12.9528	NA	12.2854	12.2573	11.9067	12.2972	12.4195	11.92	13.0425	12.2157	13.9568	12.0888	13.218	NA	NA	NA
1-1_GL0039698;1-1_GL0149091;11_GL0032113	14.0724	12.9572	13.6483	13.3752	14.7815	NA	15.4954	16.1571	14.3624	13.3841	14.599	13.6355	NA	14.7723	14.4658	15.0203	14.7709	14.7408	14.8475	14.429	14.1214	15.483	16.6944	12.8818
1-1_GL0039822	13.1417	NA	11.799	11.1668	14.2416	13.0926	13.4072	11.7446	13.5697	12.8011	12.8565	13.5238	14.1027	14.1615	13.458	12.8648	12.8703	12.4808	13.7665	12.7221	13.8904	NA	12.8355	13.0339
1-1_GL0039822;23_GL0046726;MH-6-5_GL0079858;MH-6-5_GL0091986	14.5485	13.6366	13.371	13.9201	14.725	14.8693	15.1157	15.2965	15.0447	14.6405	14.6314	14.868	14.6009	14.8905	14.7297	14.7631	14.9963	14.9972	14.5007	14.6095	14.7712	14.1386	14.6321	14.9134
1-1_GL0039822;MH-6-5_GL0091986	NA	NA	NA	NA	10.3081	11.0701	9.53152	10.0179	NA	NA	9.82375	NA	NA	10.2886	9.91557	9.78457	10.0384	NA	NA	NA	10.8846	8.22075	9.37793	NA
1-1_GL0039894	14.3173	15.2508	16.0847	14.876	15.7106	17.1405	15.7758	17.5679	15.5628	16.9454	14.2167	14.0351	14.2666	15.9283	13.8889	NA	16.2791	15.4607	15.7249	15.6676	NA	NA	NA	13.3829
1-1_GL0039894;5-8_GL0086175	14.226	15.3807	17.0681	13.8424	16.1242	17.033	15.9722	16.9972	17.1961	16.791	16.1772	16.5021	14.8595	16.4485	14.4255	NA	18.2334	15.3112	16.2409	15.3839	NA	NA	NA	14.2035
1-1_GL0039894;5-8_GL0086175;MH-6-5_GL0136822	17.2298	17.5687	18.5705	13.546	16.5504	18.6863	17.9624	19.5794	18.7286	19.1525	18.2146	17.3779	16.0219	16.7704	18.6705	17.9617	19.2085	16.3182	18.0153	17.0564	NA	13.6045	13.5086	17.6956
1-1_GL0039894;MH-6-5_GL0136822	NA	NA	NA	NA	NA	16.0153	NA	16.0277	14.7788	NA	NA	12.2566	13.1159	NA	NA	NA	NA	NA	NA	NA	NA	NA	NA	NA
1-1_GL0040368;1-1_GL0097533	NA	NA	NA	NA	NA	13.1733	NA	12.5047	NA	NA	NA	11.0303	12.2007	NA	12.2066	NA	NA	NA	NA	NA	12.6159	12.8691	NA	NA
1-1_GL0040368;1-1_GL0097533;1-1_GL0138491;1-2_GL0056317;10_GL0025698;2-1_GL0068363;2-2_GL0154178;2-3_GL0004587;2-3_GL0071040;2-4_GL0007561;3-1_GL0054518;4-1_GL0033909;4-1_GL0068204;4-2_GL0043523;5-5_GL0053324;5-8_GL0102626;54_GL0082039;6-1_GL0025244;7-1_GL0047885;7_GL0094385;G1-1A_GL0023674;G1-5A_GL0104085;MC-6-1_GL0049413;MC-6-2_GL0078340;MC-6-2_GL0178191	NA	NA	NA	NA	NA	NA	NA	15.4731	NA	NA	NA	9.52958	11.5586	NA	NA	NA	NA	NA	NA	NA	NA	NA	NA	NA
1-1_GL0040368;1-1_GL0097533;1-1_GL0138491;1-2_GL0056317;1-2_GL0106369;10_GL0025698;2-1_GL0068363;2-2_GL0154178;2-3_GL0004587;2-3_GL0071040;2-4_GL0007561;3-1_GL0054518;4-1_GL0033909;4-1_GL0068204;4-2_GL0043523;5-5_GL0053324;5-8_GL0063331;5-8_GL0102626;54_GL0082039;6-1_GL0025244;6-2_GL0076314;7-1_GL0047885;G1-1A_GL0023674;G1-5A_GL0104085;G1-5A_GL0142275;MC-6-1_GL0049413;MC-6-2_GL0078340;MC-6-2_GL01…	18.9206	16.2108	17.1665	16.7822	19.6748	18.6604	19.2007	18.0874	18.672	17.2919	18.7159	19.1079	20.0775	19.9229	19.8212	18.6125	18.4413	18.3057	19.3724	19.3573	19.1279	17.6738	17.3389	18.4193
1-1_GL0040368;1-1_GL0097533;1-1_GL0138491;1-2_GL0056317;1-2_GL0106369;10_GL0025698;2-1_GL0068363;2-2_GL0154178;2-3_GL0004587;2-3_GL0071040;2-4_GL0007561;3-1_GL0054518;4-1_GL0033909;4-1_GL0068204;4-2_GL0043523;5-5_GL0053324;5-8_GL0063331;5-8_GL0102626;54_GL0082039;6-1_GL0025244;6-6_GL0084393;7-1_GL0047885;7_GL0094385;G1-1A_GL0023674;G1-5A_GL0104085;MC-6-1_GL0049413;MC-6-2_GL0078340;MC-6-2_GL0178191	NA	NA	NA	NA	NA	13.4374	15.4316	13.1668	13.2081	NA	NA	14.7397	16.1156	14.4455	NA	NA	NA	NA	15.7949	13.3988	14.9384	11.9674	11.8674	NA
1-1_GL0040368;1-1_GL0097533;1-1_GL0138491;1-2_GL0056317;1-2_GL0106369;10_GL0025698;2-1_GL0068363;2-2_GL0154178;2-3_GL0004587;2-3_GL0071040;2-4_GL0007561;3-1_GL0054518;4-1_GL0033909;4-1_GL0068204;4-2_GL0043523;5-5_GL0053324;5-8_GL0063331;5-8_GL0102626;54_GL0082039;6-1_GL0025244;7-1_GL0047885;7_GL0094385;G1-1A_GL0023674;G1-5A_GL0104085;MC-6-1_GL0049413;MC-6-2_GL0078340;MC-6-2_GL0178191	17.2823	14.7766	15.4618	15.1229	17.935	17.0806	17.9174	16.5652	16.9386	15.8212	17.2902	17.4974	18.1916	17.9516	18.1146	16.9765	16.5644	17.1535	17.9183	17.867	17.5291	16.0487	16.2032	16.6718
1-1_GL0040368;1-1_GL0097533;1-1_GL0138491;1-2_GL0056317;1-2_GL0106369;10_GL0025698;2-1_GL0068363;2-2_GL0154178;2-3_GL0004587;2-3_GL0071040;2-4_GL0007561;3-1_GL0054518;4-1_GL0033909;4-1_GL0068204;4-2_GL0043523;5-5_GL0053324;5-8_GL0102626;54_GL0082039;6-1_GL0025244;7-1_GL0047885;G1-1A_GL0023674;G1-5A_GL0104085;MC-6-1_GL0049413;MC-6-2_GL0078340;MC-6-2_GL0178191	19.1229	17.1367	17.6479	17.1185	20.3066	19.1154	20.0456	14.4858	19.3793	17.0402	19.3283	19.4222	20.2778	20.2925	20.7031	19.193	18.0973	19.2226	20.3552	20.3545	20.0297	18.7367	NA	18.0597
1-1_GL0040368;1-1_GL0097533;1-1_GL0138491;1-2_GL0056317;1-2_GL0106369;10_GL0025698;2-1_GL0068363;2-2_GL0154178;2-3_GL0004587;2-3_GL0071040;2-4_GL0007561;3-1_GL0054518;4-1_GL0033909;4-1_GL0068204;4-2_GL0043523;5-8_GL0102626;54_GL0082039;6-1_GL0025244;7-1_GL0047885;G1-1A_GL0023674;G1-5A_GL0104085;MC-6-1_GL0049413;MC-6-2_GL0078340;MC-6-2_GL0178191	10.658	NA	NA	NA	11.8271	10.8151	10.5369	12.0715	10.8168	NA	NA	NA	11.6657	10.6675	9.90304	7.91251	10.8574	10.8165	11.6455	NA	10.654	10.6539	10.6313	11.5033
1-1_GL0040368;1-1_GL0097533;1-1_GL0138491;1-2_GL0056317;1-2_GL0106369;10_GL0025698;2-1_GL0068363;2-2_GL0154178;2-3_GL0004587;2-3_GL0071040;2-4_GL0007561;3-1_GL0054518;4-1_GL0033909;4-2_GL0043523;5-8_GL0102626;54_GL0082039;6-1_GL0025244;G1-1A_GL0023674;G1-5A_GL0104085;Group2-8A_GL0017053;MC-6-1_GL0049413;MC-6-2_GL0078340;MC-6-2_GL0178191	13.7038	NA	NA	11.6672	14.8118	12.116	14.7356	12.5695	13.4225	12.1332	13.6801	14.2254	14.3779	15.1576	11.6451	12.1926	NA	12.4966	14.4208	14.5203	14.8865	13.2965	12.58	13.6128
1-1_GL0040368;1-1_GL0097533;1-1_GL0138491;1-2_GL0056317;1-2_GL0106369;10_GL0025698;2-1_GL0068363;2-2_GL0154178;2-3_GL0004587;2-3_GL0071040;2-4_GL0007561;3-1_GL0054518;4-1_GL0068204;4-2_GL0043523;5-5_GL0053324;5-8_GL0102626;7-1_GL0047885;G1-1A_GL0023674;G1-5A_GL0104085;MC-6-1_GL0049413;MC-6-2_GL0078340	12.9748	11.1277	11.951	11.8123	14.3171	13.1812	13.4163	11.9489	13.0618	NA	13.417	13.1899	13.9049	14.2842	10.6471	12.9494	13.4757	11.5851	14.6527	14.0097	13.6578	12.2593	12.1813	12.0919
1-1_GL0040368;1-1_GL0097533;1-1_GL0138491;1-2_GL0056317;1-2_GL0106369;10_GL0025698;2-1_GL0068363;2-2_GL0154178;2-3_GL0004587;3-1_GL0054518;4-1_GL0033909;4-1_GL0068204;4-2_GL0043523;5-5_GL0053324;5-8_GL0063331;5-8_GL0102626;54_GL0082039;6-1_GL0025244;7-1_GL0047885;G1-1A_GL0023674;G1-5A_GL0104085;MC-6-1_GL0049413;MC-6-2_GL0078340	18.8051	16.8955	17.6422	17.3663	19.9999	19.2416	19.8552	18.1289	19.1425	17.7429	19.1709	19.3147	20.3037	20.1986	20.3751	19.0217	18.7491	18.9675	19.977	20.0491	19.5551	18.4113	18.27	18.7014
1-1_GL0040368;1-1_GL0097533;1-1_GL0138491;1-2_GL0056317;1-2_GL0106369;10_GL0025698;2-1_GL0068363;2-3_GL0071040;4-1_GL0033909;4-1_GL0068204;4-2_GL0043523;5-5_GL0053324;5-8_GL0102626;7-1_GL0047885;G1-1A_GL0023674;G1-5A_GL0104085;MC-6-2_GL0078340;MC-6-2_GL0178191	15.0073	NA	NA	NA	NA	15.5119	15.5757	13.1524	14.2957	NA	NA	16.0978	16.49	15.1933	NA	13.5175	NA	15.225	17.2105	NA	16.6104	15.5654	14.0982	NA
1-1_GL0040368;1-1_GL0097533;1-1_GL0138491;1-2_GL0056317;1-2_GL0106369;10_GL0025698;2-2_GL0154178;2-3_GL0004587;2-3_GL0071040;2-4_GL0007561;3-1_GL0054518;4-1_GL0033909;4-1_GL0068204;4-2_GL0043523;5-5_GL0053324;5-8_GL0102626;54_GL0082039;6-1_GL0025244;7-1_GL0047885;G1-1A_GL0023674;G1-5A_GL0104085;MC-6-1_GL0049413;MC-6-2_GL0078340;MC-6-2_GL0178191	17.4603	14.8021	15.1099	15.1924	17.9658	16.9639	18.9612	17.9137	16.8589	17.4492	17.1172	18.9191	17.8216	18.1848	18.075	16.1898	16.8905	17.6762	17.4914	18.4974	16.4451	16.2147	19.2937	16.8242
1-1_GL0040368;1-1_GL0097533;1-1_GL0138491;1-2_GL0106369;10_GL0025698;2-1_GL0068363;2-2_GL0154178;2-3_GL0004587;2-3_GL0071040;2-4_GL0007561;3-1_GL0054518;4-1_GL0033909;4-1_GL0068204;4-2_GL0043523;5-5_GL0053324;54_GL0082039;7-1_GL0047885;7_GL0094385;G1-1A_GL0023674;G1-5A_GL0104085;MC-6-1_GL0049413	10.6317	10.9428	10.5893	10.5701	14.5849	15.7107	12.6314	13.1228	12.8253	12.4224	12.1718	13.1294	14.8641	14.5044	14.1768	12.0002	13.5712	12.2276	15.2654	13.3277	14.0015	12.5208	10.7787	12.1992
1-1_GL0040368;1-1_GL0097533;1-1_GL0138491;1-2_GL0106369;10_GL0025698;2-1_GL0068363;2-2_GL0154178;2-3_GL0004587;2-3_GL0071040;2-4_GL0007561;3-1_GL0054518;4-1_GL0068204;4-2_GL0043523;5-5_GL0053324;54_GL0082039;6-1_GL0025244;7-1_GL0047885;G1-1A_GL0023674;G1-5A_GL0104085;MC-6-1_GL0049413;MC-6-2_GL0078340	14.7645	12.7079	13.7787	13.3114	16.3016	16.0317	16.3388	14.8053	14.5617	13.7155	15.7035	15.1118	16.5184	16.3191	16.148	15.131	14.3764	14.4806	16.4243	16.1523	16.2894	14.6072	13.6241	14.5705
1-1_GL0040368;1-1_GL0097533;1-2_GL0056317;1-2_GL0106369;10_GL0025698;2-4_GL0007561;4-1_GL0033909;4-1_GL0068204;5-5_GL0053324;5-8_GL0102626;54_GL0082039;6-1_GL0025244;7-1_GL0047885;G1-1A_GL0023674;MC-6-1_GL0049413;MC-6-2_GL0078340;MC-6-2_GL0178191	NA	NA	NA	NA	NA	NA	NA	15.5264	NA	NA	NA	15.4007	NA	NA	NA	NA	NA	NA	NA	NA	NA	NA	NA	NA
1-1_GL0040368;1-1_GL0097533;1-2_GL0106369;10_GL0025698;2-2_GL0154178;2-3_GL0071040;2-4_GL0007561;4-1_GL0033909;4-2_GL0043523;5-5_GL0053324;5-8_GL0102626;54_GL0082039;6-1_GL0025244;7_GL0094385;G1-1A_GL0023674;G1-5A_GL0104085;MC-6-2_GL0078340;MC-6-2_GL0178191	NA	NA	NA	NA	11.6407	12.046	NA	11.5381	NA	NA	NA	NA	12.9731	NA	10.9845	NA	11.1492	NA	12.5745	NA	12.0961	NA	NA	NA
1-1_GL0040368;1-1_GL0097533;1-2_GL0106369;10_GL0025698;4-1_GL0068204;4-2_GL0043523;5-5_GL0053324;7-1_GL0047885;7_GL0094385;G1-1A_GL0023674;G1-5A_GL0104085;MC-6-1_GL0049413;MC-6-2_GL0078340	NA	NA	NA	NA	NA	11.1548	NA	10.3383	NA	NA	NA	NA	NA	NA	NA	NA	NA	NA	NA	NA	NA	NA	NA	NA
1-1_GL0040368;1-1_GL0097533;2-1_GL0068363;2-2_GL0154178;3-1_GL0054518;4-1_GL0033909;4-1_GL0068204;5-5_GL0053324;5-8_GL0102626;7-1_GL0047885;MC-6-1_GL0049413;MC-6-2_GL0078340	NA	NA	NA	NA	11.9354	13.3817	12.7352	10.4954	NA	NA	NA	NA	13.061	11.6523	12.4437	NA	10.2625	NA	12.5365	NA	11.8868	11.8378	NA	NA
1-1_GL0040368;1-1_GL0097533;2-1_GL0068363;4-1_GL0068204;4-2_GL0043523;5-5_GL0053324;G1-5A_GL0104085	NA	NA	NA	NA	NA	NA	NA	NA	NA	NA	NA	NA	15.5999	NA	NA	NA	NA	NA	NA	NA	NA	NA	15.1236	NA
1-1_GL0040368;1-1_GL0138491;10_GL0025698;3-1_GL0054518;4-1_GL0033909;4-1_GL0068204;4-2_GL0043523;7-1_GL0047885;G1-1A_GL0023674;G1-5A_GL0104085;MC-6-1_GL0049413;MC-6-2_GL0078340	NA	NA	NA	NA	NA	NA	NA	13.34	14.0285	NA	NA	11.919	13.8296	NA	14.1392	NA	NA	13.6088	NA	NA	12.8393	NA	NA	NA
1-1_GL0040368;1-1_GL0138491;1-2_GL0056317;10_GL0002188;2-1_GL0068363;2-2_GL0154178;2-3_GL0004587;2-3_GL0071040;2-4_GL0007561;3-1_GL0054518;4-1_GL0033909;4-1_GL0068204;5-5_GL0053324;54_GL0082039;6-1_GL0025244;7-1_GL0047885;MC-6-1_GL0049413;MC-6-2_GL0078340;MC-6-2_GL0178191	19.5853	16.8362	17.6251	17.3481	20.1542	18.9132	19.9428	18.5379	19.295	17.3048	19.605	19.6591	20.4763	20.3382	20.3407	19.4534	18.7982	19.1045	19.9626	20.0406	19.7385	18.4459	17.9252	18.44
1-1_GL0040368;1-1_GL0138491;1-2_GL0056317;10_GL0025698;2-1_GL0068363;2-2_GL0154178;2-3_GL0004587;2-3_GL0071040;2-4_GL0007561;3-1_GL0054518;4-1_GL0033909;4-1_GL0068204;5-5_GL0053324;5-8_GL0102626;54_GL0082039;6-1_GL0025244;7-1_GL0047885;G1-1A_GL0023674;G1-5A_GL0104085;MC-6-1_GL0049413;MC-6-2_GL0078340;MC-6-2_GL0178191	NA	NA	NA	NA	NA	NA	NA	13.8026	NA	NA	NA	NA	NA	NA	NA	NA	NA	NA	NA	NA	NA	NA	NA	NA
1-1_GL0040368;1-1_GL0138491;1-2_GL0056317;2-1_GL0068363;2-2_GL0154178;2-3_GL0004587;2-4_GL0007561;3-1_GL0054518;4-1_GL0068204;4-2_GL0043523;5-5_GL0053324;5-8_GL0102626;7-1_GL0047885;MC-6-1_GL0049413;MC-6-2_GL0078340;MC-6-2_GL0178191	20.0024	17.1076	18.3048	17.5392	20.4791	19.3542	20.4445	18.8324	19.5059	18.1553	19.5979	19.9858	20.2436	20.641	20.7428	19.3923	19.472	19.5082	20.1745	20.541	19.5648	18.6293	18.3784	19.4413
1-1_GL0040368;1-2_GL0056317;2-4_GL0007561;4-1_GL0033909;4-1_GL0068204;4-2_GL0043523;5-5_GL0053324;7-1_GL0047885;G1-5A_GL0104085;Group2-8A_GL0017053;MC-6-1_GL0049413	NA	NA	NA	NA	NA	NA	NA	NA	NA	NA	NA	NA	12.0813	11.8568	NA	NA	12.66	NA	NA	NA	NA	NA	13.0497	NA
1-1_GL0040368;1-2_GL0056317;2-4_GL0007561;4-1_GL0033909;4-1_GL0068204;5-5_GL0053324;54_GL0082039;6-1_GL0025244;7-1_GL0047885;MC-6-2_GL0078340	10.885	11.7139	11.2105	11.7021	13.7806	13.2923	11.8969	10.4242	13.293	10.6009	11.7807	12.7996	14.2578	13.5158	12.613	12.729	12.066	12.1605	13.2333	12.9577	13.1504	12.5623	11.2123	11.8567
1-1_GL0040368;1-2_GL0106369;2-1_GL0068363;2-4_GL0007561;4-2_GL0043523;5-8_GL0102626;G1-5A_GL0104085;MC-6-1_GL0049413	NA	NA	NA	NA	NA	NA	NA	13.9149	NA	NA	NA	14.6157	NA	NA	NA	NA	NA	NA	NA	NA	NA	NA	NA	NA
1-1_GL0040368;2-4_GL0007561;4-1_GL0033909;4-1_GL0068204;54_GL0082039;7-1_GL0047885;MC-6-1_GL0049413;MC-6-2_GL0078340;MC-6-2_GL0178191	14.095	14.2559	13.3362	14.7614	16.619	16.1359	15.2546	NA	15.7646	14.5904	15.0213	15.5596	15.834	16.8069	16.4661	15.2718	15.7871	16.1108	16.6291	15.6916	15.388	15.7669	15.2344	NA
1-1_GL0040368;2-4_GL0007561;4-1_GL0068204;4-2_GL0043523;5-5_GL0053324;7-1_GL0047885;G1-5A_GL0104085;MC-6-1_GL0049413	NA	NA	NA	NA	NA	NA	NA	14.6895	NA	NA	NA	NA	15.9741	NA	NA	NA	NA	NA	NA	NA	13.3657	NA	NA	NA
1-1_GL0040368;4-1_GL0068204;6-1_GL0025244;MC-6-2_GL0078340	13.2657	13.778	12.8171	14.1871	15.8697	14.4381	14.4139	NA	14.7209	14.1294	15.0357	16.2425	16.6846	16.1574	16.7809	16.0257	15.9826	17.0553	16.0789	16.3357	15.6284	15.1437	15.929	15.6346
1-1_GL0040368;MC-6-2_GL0078340	12.1538	13.9128	12.6824	14.3163	14.3858	13.7947	14.3617	14.114	13.3578	13.2836	12.8307	14.7467	14.798	14.4355	15.9814	15.5338	14.5572	14.4596	13.8202	15.2855	12.9684	15.5215	14.4038	15.3594
1-1_GL0040488	12.9782	NA	NA	NA	14.1798	14.1259	14.9686	15.057	16.2509	13.1696	13.9893	14.2384	13.4314	14.4956	14.2374	NA	14.0678	16.0653	13.2383	13.9809	15.5854	14.1244	16.6151	17.5217
1-1_GL0040488;1-1_GL0041844;1-1_GL0135553;17_GL0054728;2-1_GL0009760;2-3_GL0062071;2-3_GL0062072;2-8_GL0100524;2-8_GL0100526;28_GL0037869;3-5_GL0047916;31_GL0034271;49_GL0077775;5-3_GL0006268;5-8_GL0134376;7-1_GL0019247;7-4_GL0069222;8-2_GL0111531;G1-1A_GL0092180;G1-1A_GL0102557;G1-5A_GL0096260;G1-5A_GL0133398;Group2-1A_GL0079313;Group2-3A_GL0074883;Group2-4A_GL0005454;Group2-4A_GL0005459;Group2-…	20.9315	18.6807	20.4643	18.7586	20.1139	19.6004	20.0602	19.7551	19.255	19.3106	20.4363	20.6872	19.6614	20.2226	19.7634	19.307	18.8186	19.948	19.4273	20.6418	19.4913	16.5319	18.5219	20.6269
1-1_GL0040488;1-1_GL0041844;1-2_GL0002789;17_GL0054728;2-3_GL0062072;20_GL0063005;20_GL0178642;28_GL0037869;3-5_GL0081488;38_GL0006105;38_GL0076495;5-3_GL0006268;5-8_GL0134376;G1-5A_GL0096260;Group2-1A_GL0079313;S-Fe12_GL0075450	15.2877	10.2499	13.685	13.0137	15.834	15.5624	14.8475	13.8288	14.6664	14.5182	12.1417	13.8787	15.485	16.0018	15.9808	14.8876	14.7216	15.1297	15.6503	13.6748	16.0444	13.8079	13.9105	15.068
1-1_GL0040488;1-1_GL0041844;17_GL0054728;2-3_GL0062071;2-3_GL0062072;49_GL0077775;5-8_GL0134376;Group2-1A_GL0079313;Group2-3A_GL0074883;S-Fe12_GL0075450;S-Fe12_GL0075454	NA	NA	NA	NA	NA	11.4699	NA	NA	NA	NA	NA	NA	NA	NA	NA	NA	NA	NA	NA	NA	NA	NA	NA	NA
1-1_GL0040488;1-2_GL0002789;17_GL0054728;3-5_GL0081488	13.9133	10.115	13.4448	NA	16.2171	14.6812	16.7556	17.6565	16.9551	14.3815	14.8466	14.1916	12.601	16.3684	13.6701	NA	15.6173	18.3921	14.3156	15.472	16.5392	NA	17.9712	18.6165
1-1_GL0040488;17_GL0054728;2-1_GL0045814;2-3_GL0062071;2-3_GL0062072;20_GL0019808;28_GL0037869;49_GL0077775;5-3_GL0006268;5-8_GL0134376;G1-5A_GL0096260;Group2-1A_GL0079313;Group2-1A_GL0084123;Group2-4A_GL0108882;S-Fe12_GL0075450;S-Fe12_GL0075454	21.5578	NA	20.1796	NA	21.3534	21.2142	22.0461	NA	20.7871	21.1139	21.8085	21.1898	21.5029	21.4807	21.6768	NA	20.961	21.4397	21.8444	21.7938	NA	19.6145	20.3572	21.3983
1-1_GL0040488;20_GL0063005;20_GL0178642;3-5_GL0081488;38_GL0006105;38_GL0076495;Group2-1A_GL0079313;Group2-1A_GL0084123;Group2-4A_GL0181870	NA	NA	NA	NA	NA	NA	NA	NA	NA	NA	NA	NA	16.4604	NA	NA	NA	NA	NA	NA	NA	NA	NA	NA	NA
1-1_GL0040488;2-8_GL0037621;20_GL0063005;20_GL0178642;3-5_GL0081488;38_GL0006105;5-8_GL0134414;6-2_GL0061949;S-Fe7_GL0233959	NA	NA	NA	NA	13.2587	10.8102	10.7777	11.2875	11.9286	NA	10.7376	11.1275	14.0724	13.0827	13.3738	12.2139	NA	12.5405	11.7531	12.2044	12.9829	10.6867	11.6801	NA
1-1_GL0040659;10_GL0051410;11_GL0106926;13_GL0046450;1A-dyr2-07_GL0007769;3-2_GL0053877;4-7_GL0061304;5-7_GL0064061;7-5_GL0046371;Group2-2A_GL0072581;MC-6-2_GL0134348;S-Fe20_GL0190872	16.0287	NA	NA	NA	16.2291	NA	NA	NA	15.9633	14.4113	NA	NA	NA	16.1618	16.3954	NA	15.7685	NA	NA	NA	16.2636	NA	NA	NA
1-1_GL0040659;1-1_GL0061372;10_GL0051410;11_GL0106926;13_GL0046450;1A-dyr2-07_GL0007769;3-2_GL0053877;4-7_GL0061304;5-7_GL0064061;7-5_GL0046371;Group2-2A_GL0072581;Group2-8A_GL0009740;MC-6-2_GL0134348;S-Fe20_GL0190872	NA	NA	NA	NA	14.8916	NA	NA	NA	NA	NA	NA	NA	NA	14.8393	14.989	8.56514	NA	15.0963	NA	14.7634	NA	NA	NA	9.94994
1-1_GL0040659;1-1_GL0061372;13_GL0046450;3-2_GL0053877;Group2-8A_GL0009740	13.111	NA	12.5747	11.2717	14.57	12.9463	13.2366	12.9151	14.3165	13.5459	13.5818	14.3442	14.3316	14.5188	13.3254	12.1281	14.8846	15.124	14.1852	15.049	15.0398	NA	14.5444	14.4262
1-1_GL0040659;1-1_GL0061372;3-2_GL0053877;Group2-8A_GL0009740	NA	NA	NA	NA	NA	NA	NA	NA	NA	NA	11.7125	NA	14.1718	NA	NA	NA	NA	14.4339	13.9488	13.9701	13.8444	NA	12.8831	NA
1-1_GL0040818	11.0876	12.3613	13.4164	NA	13.3546	14.2406	NA	12.5385	13.8559	11.2231	13.059	NA	12.6185	13.2394	13.2405	NA	14.8805	13.1177	15.5321	12.0517	14.2086	NA	NA	12.1034
1-1_GL0040818;1-1_GL0116892;1-2_GL0109440;2-1_GL0014526;2-1_GL0092823;4-1_GL0044060;5-1_GL0025617;7-1_GL0050743;G1-5A_GL0100317;S-Fe2_GL0096220	15.6809	15.0237	15.2067	15.043	17.552	17.0972	16.9863	16.0677	15.6698	14.6482	17.3516	NA	16.1542	17.594	18.263	15.002	16.4721	15.6891	18.6983	16.7584	NA	17.4584	16.0393	14.7905
1-1_GL0040818;1-2_GL0109440	NA	NA	NA	NA	NA	NA	NA	NA	NA	NA	NA	NA	NA	NA	NA	NA	11.4175	NA	NA	NA	NA	NA	NA	NA
1-1_GL0041200	NA	NA	NA	NA	13.1359	13.9593	12.6198	13.2223	NA	NA	NA	NA	13.0916	13.1457	12.831	12.9664	NA	NA	NA	NA	12.9769	13.5659	13.6682	14.2494
11_GL0041387	NA	NA	NA	NA	15.2988	NA	NA	NA	NA	NA	NA	NA	15.6799	15.3645	15.243	NA	NA	NA	NA	NA	NA	NA	NA	14.1812
11_GL0041387;43_GL0029674	13.1308	9.65671	11.2052	NA	13.5064	12.8669	14.4102	10.6707	11.5182	10.8929	13.561	13.8044	15.1022	13.598	13.124	11.6483	13.4081	12.7301	14.7108	13.8749	13.6755	NA	11.9279	10.2648
11_GL0041387;5-2_GL0024931	15.3779	NA	14.5021	NA	16.4193	15.1574	NA	14.5831	15.7079	13.9177	NA	NA	16.276	15.8337	15.8662	15.5065	14.7425	NA	15.155	16.4887	16.5366	16.8711	15.418	15.3101
11_GL0041387;S-Fe5_GL0056502	14.5754	12.9725	12.7494	12.9833	13.7624	16.4055	NA	13.6966	14.6272	13.12	14.3278	11.4363	13.6446	13.9587	14.2925	13.9502	12.9761	13.6852	15.1142	14.3169	15.3341	17.5645	14.5989	14.5519
1-1_GL0041447	14.0823	15.2746	12.2931	13.7112	NA	11.1186	12.929	15.0656	NA	NA	14.2189	14.4764	14.1121	NA	13.8167	12.9434	14.1274	13.0066	14.7501	14.5369	13.2561	13.3404	15.3748	12.8505
1-1_GL0041447;3-1_GL0062029;MH-6-1_GL0115998	15.5667	15.0363	15.3766	15.081	16.3432	16.3201	16.2118	NA	15.7011	13.5196	16.1082	15.0688	16.7855	16.2801	16.228	16.0884	15.156	15.284	16.6327	15.7802	16.7698	16.5703	15.7366	15.6254
1-1_GL0041844	NA	NA	12.5143	NA	15.5679	14.0806	14.805	16.2188	14.4609	13.9382	12.939	12.9775	15.366	15.5111	14.1954	14.5515	13.7732	17.3995	15.5336	14.1223	16.2266	14.1255	15.8433	16.0181
1-1_GL0041844;1-1_GL0077524;1-1_GL0135553;1-2_GL0002789;1-2_GL0059967;1-4_GL0011369;10_GL0015619;17_GL0054728;2-1_GL0033208;2-2_GL0087128;2-3_GL0062071;2-3_GL0062072;2-7_GL0062923;2-8_GL0037621;20_GL0063005;20_GL0178642;28_GL0037869;2A-dyr16-07_GL0031078;3-5_GL0081488;3-7_GL0032127;3-8_GL0041886;38_GL0006105;38_GL0076495;4-4_GL0081307;4-7_GL0022772;49_GL0077775;5-3_GL0006268;5-4_GL0037337;5-7_GL0…	20.6227	19.134	19.7374	19.5826	20.0613	19.9462	20.1814	20.1118	NA	19.9193	20.5482	NA	NA	19.9725	19.5487	19.285	19.0645	20.9293	19.8206	20.5382	NA	18.5033	NA	20.2054
1-1_GL0041844;1-1_GL0135553;1-2_GL0059967;10_GL0015619;14_GL0016880;1_GL0043524;2-1_GL0033208;2-1_GL0039651;2-1_GL0043783;2-1_GL0045814;2-1_GL0095220;2-2_GL0126451;2-3_GL0062059;2-8_GL0037621;20_GL0019808;2B-dyr23-07_GL0049983;3-1_GL0097688;3-2_GL0068898;3-7_GL0032127;4-4_GL0081307;5-4_GL0037337;5-7_GL0037700;5-8_GL0004261;5-8_GL0134414;54_GL0078610;6-2_GL0061949;6-3_GL0000806;7-5_GL0144179;7_GL0…	18.7275	18.5679	19.2376	17.9423	19.8173	19.2638	18.2379	19.7673	18.8395	18.4874	19.012	18.6228	19.9254	19.6214	19.8757	19.1305	19.137	19.0815	20.032	19.0352	19.9227	18.603	18.4043	18.8702
1-1_GL0041844;17_GL0054728	NA	NA	NA	NA	13.828	NA	12.7534	14.2765	13.6041	NA	NA	NA	NA	13.9559	NA	NA	NA	15.4975	NA	NA	15.1266	NA	15.891	15.7771
1-1_GL0041844;2-1_GL0039651;20_GL0019808;G1-1A_GL0102557;Group2-6A_GL0131438;S-Fe12_GL0075454	16.6704	NA	12.0509	NA	16.7191	NA	15.5671	15.3809	12.783	13.7067	15.7624	16.0257	16.3922	16.7926	18.4081	17.4487	13.1295	15.9186	15.63	16.9477	16.0196	14.9961	13.4504	15.4075
1-1_GL0041844;31_GL0034271	NA	NA	NA	NA	10.59	NA	NA	6.65736	NA	NA	NA	NA	11.0981	10.609	11.6617	10.1771	NA	NA	NA	NA	NA	NA	NA	NA
1-1_GL0041844;3-5_GL0081488;5-3_GL0006268	20.5352	11.8323	15.7315	15.9418	19.1521	18.5462	19.4087	NA	17.182	15.9105	18.6072	17.2289	20.5636	19.1174	19.7403	18.2945	16.9874	19.0516	19.1966	20.5166	19.3727	16.3433	18.3332	18.5191
1-1_GL0041857	15.1949	15.3797	14.2741	15.7709	14.6833	13.9394	13.2824	15.0888	15.1365	12.5014	15.9316	15.1554	14.7878	14.6413	15.2569	15.1825	15.0329	15.5488	16.5245	14.0242	16.2822	13.994	NA	14.1215
1-1_GL0041857;11_GL0053374;1A-dyr4-07_GL0028776;2-1_GL0106976;2_GL0025466;3-7_GL0067223;4-1_GL0035742;5-1_GL0042433;6-3_GL0057956;6-7_GL0028379;7-3_GL0054179;7-4_GL0040368;7-5_GL0104959;8_GL0038333;Group2-7A_GL0057465;S-Fe2_GL0192770	NA	14.2009	13.8873	14.6379	16.2997	14.103	14.9851	NA	13.8109	14.6376	NA	14.0339	16.2234	16.0546	14.8187	14.6251	14.6349	14.7089	NA	14.1711	14.7408	NA	14.7003	14.2728
1-1_GL0041857;1-1_GL0078624;11_GL0010402;1A-dyr2-07_GL0017940;1A-dyr2-07_GL0060154;2-1_GL0043938;2-1_GL0061307;2-8_GL0078176;2_GL0025466;3-7_GL0067223;32_GL0021838;4-2_GL0084916;4-7_GL0095119;4-8_GL0070713;6-2_GL0018346;6-4_GL0066269;6-5_GL0061757;6-7_GL0028379;7-4_GL0040368;G1-8A_GL0042005	NA	9.42009	10.1483	NA	12.765	12.4063	NA	12.3826	11.4011	NA	NA	11.4531	13.6877	12.902	10.7461	10.7096	12.2976	NA	12.7577	NA	13.1627	NA	11.1007	10.5419
1-1_GL0041857;1-1_GL0078624;1-1_GL0145214;11_GL0010402;11_GL0053374;1A-dyr2-07_GL0017940;1A-dyr2-07_GL0060154;1A-dyr4-07_GL0028776;1A-dyr4-07_GL0053873;2-1_GL0043938;2-1_GL0061307;2-1_GL0106976;2-8_GL0078176;2_GL0025466;3-7_GL0067223;32_GL0021838;4-1_GL0035742;4-1_GL0052696;4-2_GL0084916;4-7_GL0095119;4-8_GL0070713;5-1_GL0042433;6-2_GL0018346;6-3_GL0057956;6-4_GL0066269;6-5_GL0061757;6-7_GL002837…	19.6282	18.2387	19.1294	18.9087	20.3644	19.4089	20.5988	19.6205	20.3749	18.4402	20.0396	19.5774	20.48	18.0518	20.2816	20.3254	19.254	19.8553	19.959	19.8326	20.4025	19.8786	19.2764	19.518
1-1_GL0041857;1-1_GL0078624;2-1_GL0043938;2-1_GL0061307;2-1_GL0106976;32_GL0021838;4-1_GL0035742;4-1_GL0052696;4-7_GL0095119;4-8_GL0070713;5-1_GL0042433;6-7_GL0028379;7-3_GL0054179;7-5_GL0104959;G1-8A_GL0042005	16.0818	15.3789	16.0065	15.9372	18.2457	16.8616	17.8933	NA	NA	16.1516	16.9761	NA	17.8241	18.2248	18.1046	16.3722	16.7779	16.8502	17.837	16.5637	NA	16.5422	16.983	16.5441
1-1_GL0041857;1-1_GL0107767;11_GL0010402;1A-dyr2-07_GL0017940;2-8_GL0078176;3-7_GL0067223;6-2_GL0018346;6-4_GL0066269;Group2-7A_GL0057465;S-Fe2_GL0192770	NA	NA	NA	NA	NA	NA	NA	18.3608	NA	NA	NA	NA	NA	NA	NA	NA	NA	NA	17.9815	NA	NA	NA	NA	NA
1-1_GL0041857;2-1_GL0043938;2-1_GL0061307;6-7_GL0028379;G1-8A_GL0042005	13.0658	10.7266	12.5885	11.4342	13.733	NA	13.6372	12.5511	13.0367	NA	13.3601	13.9847	14.7435	14.0435	13.452	12.8747	12.9533	12.6724	13.6115	13.9931	14.0127	NA	12.7945	11.7718
1-1_GL0041857;2-1_GL0106976;4-1_GL0035742;5-1_GL0042433;6-7_GL0028379;7-3_GL0054179;7-5_GL0104959	15.4344	15.1724	14.7442	15.9242	17.4769	17.6354	16.4939	15.9995	17.7136	15.8633	16.9389	16.6658	18.0013	17.6088	17.4929	16.449	16.3064	17.3998	18.757	17.0729	17.2433	17.06	15.8512	15.1268
1-1_GL0041857;2-1_GL0106976;4-1_GL0035742;7-3_GL0054179	14.599	15.7775	15.5607	16.2896	18.0462	17.6614	16.0782	15.4379	17.0733	15.5929	16.4669	16.6483	16.8793	18.0625	17.7608	17.0096	16.7231	16.6791	18.1795	16.966	16.5331	16.429	NA	14.8252
1-1_GL0041857;Group2-7A_GL0057465	NA	NA	NA	NA	11.3631	12.4118	NA	12.2096	NA	NA	NA	NA	12.0442	11.4524	12.2243	NA	12.0565	NA	11.7397	NA	11.6238	NA	NA	NA
1-1_GL0042003;17_GL0101032;4-8_GL0087013	15.0133	NA	16.6698	NA	16.3447	11.6814	15.5885	13.4413	16.7809	15.3217	16.0361	13.1655	14.8743	16.4332	15.3882	NA	17.3233	14.4322	15.1816	NA	15.6587	NA	15.9302	NA
1-1_GL0042165	12.0258	12.0553	10.881	12.4391	14.1149	14.7568	14.1539	13.9032	14.003	12.3274	12.6128	11.5037	13.7928	14.1066	13.4654	14.237	12.2843	12.5151	13.1308	12.3238	14.0533	14.5944	12.6357	NA
1-1_GL0042165;1-4_GL0059879	12.1004	NA	NA	NA	13.8275	14.1404	13.7895	NA	13.0945	10.946	12.8923	NA	13.9194	14.0446	13.8255	NA	13.0928	13.1413	13.4974	12.758	NA	13.9573	12.4388	13.2748
1-1_GL0042165;1-4_GL0059879;S-Fe7_GL0070778	13.9536	12.6746	12.3746	12.9696	14.8635	15.3286	14.7287	14.654	14.6437	13.5159	14.0423	14.0644	15.1265	14.8791	14.7767	14.519	13.9057	14.5019	14.2692	13.9616	15.1312	14.8215	13.5339	13.9842
11_GL0042282;14_GL0000416;14_GL0118341;2-3_GL0050614;S-Fe4_GL0132117	15.5209	16.5387	15.9687	16.3115	14.9597	14.0434	13.5149	13.9876	14.8982	14.1324	15.621	15.0062	15.5772	14.9885	15.5449	14.4926	14.3656	13.4654	15.3982	15.2795	14.9339	NA	14.9691	13.9917
11_GL0042282;14_GL0118341;S-Fe4_GL0132117	15.5553	15.7424	15.5405	14.5849	13.2914	12.8904	13.3442	15.5831	14.2116	14.1743	15.3188	15.5113	13.9087	13.205	14.2403	14.3907	15.1618	13.3895	14.4921	15.0459	13.6175	13.2191	15.0643	14.7774
11_GL0042282;2-2_GL0081124;2-3_GL0050614;5_GL0028336;7-8_GL0029101;MH-6-5_GL0129225;S-Fe2_GL0013443;S-Fe4_GL0132117;S-Fe9_GL0229005	16.5568	16.3874	15.7144	16.1955	16.3139	16.3637	15.7721	15.8444	15.6167	14.6169	15.8809	15.9133	16.2991	16.3568	17.2599	15.0448	14.6937	15.3782	17.0401	15.7908	16.3483	17.6365	15.7273	14.5344
11_GL0042282;S-Fe4_GL0132117	15.4409	15.395	15.3219	14.5686	12.812	13.4957	12.4833	14.6276	13.887	14.5894	14.57	14.9823	12.7305	12.816	NA	13.88	14.5538	13.0888	13.0376	14.6512	12.2615	13.2559	13.0825	13.5845
11_GL0042296	13.7532	14.1203	13.9965	12.9903	11.8965	12.9948	12.4458	13.4588	13.1527	12.8998	13.4844	13.9293	12.0594	12.5807	12.6314	12.9151	13.2232	12.4675	12.351	13.4555	11.5955	12.5537	11.9785	13.0569
11_GL0042298	15.1276	14.6484	14.3842	13.8955	12.4371	13.4637	12.763	14.3064	14.0673	14.2052	14.33	14.9278	12.8897	NA	NA	13.4583	14.3354	13.2841	12.8497	14.3681	12.407	12.717	12.9703	13.5257
11_GL0042302	15.4174	15.0156	14.9266	13.8492	12.4484	13.5162	12.715	14.3341	13.9045	14.5727	14.5816	14.603	12.5451	12.4222	NA	13.725	14.2219	13.258	13.1765	14.9508	11.8251	13.0299	12.9814	13.7982
1-1_GL0043110	NA	NA	NA	NA	NA	NA	NA	NA	NA	NA	NA	NA	NA	NA	NA	NA	16.5815	13.0839	NA	NA	NA	NA	15.3369	NA
1-1_GL0043549	13.7167	12.6858	14.1402	12.6772	15.2628	13.9354	15.5627	13.2128	14.4636	14.6124	13.5981	14.7973	15.107	15.2158	14.8819	13.8179	14.7347	15.1626	14.071	14.0008	15.0723	NA	14.5709	15.4435
1-1_GL0043549;1-1_GL0123231	NA	13.2564	14.7651	12.9627	15.3613	14.5692	15.4972	13.2215	14.6402	14.7858	NA	NA	15.2283	15.4677	14.8386	14.5692	15.2551	15.2583	NA	14.5894	14.8356	NA	14.5692	15.0824
11_GL0043820	15.4094	14.4826	13.7114	14.273	15.6801	17.2981	16.9077	15.1211	14.5616	14.8529	14.6944	14.9955	15.7933	15.6527	16.09	15.3687	14.1218	15.2641	16.119	15.9655	16.7747	17.8815	16.1448	13.3894
11_GL0044796	NA	NA	NA	NA	NA	12.9441	NA	11.6028	NA	NA	NA	NA	11.4874	NA	10.5865	NA	NA	NA	NA	NA	11.6472	13.7947	NA	NA
11_GL0044796;17_GL0083926;20_GL0054153;S-Fe18_GL0004478	14.9616	13.0482	NA	14.0634	NA	16.3179	15.6193	NA	15.2974	12.9526	15.309	NA	16.9964	14.3922	15.9867	14.4489	13.964	14.4395	15.6971	14.8689	NA	15.9813	NA	14.6502
11_GL0044796;1A-dyr4-07_GL0032856	15.8816	14.8227	14.7813	14.3707	15.901	16.8188	12.8581	15.7206	15.5185	15.9062	15.9039	13.8476	15.7597	15.9114	15.8218	15.9728	15.9433	16.2761	16.4921	15.35	16.3358	17.6552	16.2981	16.2343
11_GL0044796;1A-dyr4-07_GL0032856;4-2_GL0081832	14.6321	14.4141	13.637	14.1093	15.7967	15.9921	15.7337	15.2044	15.039	14.5588	14.8067	14.1088	16.169	15.733	15.1796	14.8415	15.4244	14.9205	15.2934	14.3574	15.9057	16.1525	14.382	14.8879
11_GL0044803;11_GL0106913;11_GL0131224;20_GL0163289;6-3_GL0059447;S-Fe12_GL0182026	11.2382	NA	NA	NA	12.5663	NA	12.6054	NA	NA	NA	NA	NA	NA	12.4477	12.8531	11.5883	NA	NA	NA	NA	NA	NA	NA	12.136
11_GL0044803;11_GL0106913;11_GL0131224;2-3_GL0012648;6-3_GL0059447;6-4_GL0079360;7-5_GL0059292;Group2-2A_GL0042555;S-Fe12_GL0182026	16.0872	13.7194	NA	14.1379	16.0765	15.7818	16.5434	15.7405	15.4406	13.9496	15.5733	15.4362	16.3753	16.0891	16.7359	15.0288	15.0215	15.5016	16.6126	15.5123	16.2023	16.1593	14.9165	15.2371
11_GL0044803;11_GL0131224;20_GL0163289	NA	10.4868	9.66948	10.7847	11.3811	11.9824	NA	9.69829	9.84998	NA	10.5282	NA	11.4573	11.2241	NA	10.6677	NA	NA	10.931	NA	11.2455	13.0381	9.77338	NA
11_GL0044803;11_GL0131224;20_GL0163289;6-3_GL0059447	NA	10.3945	NA	9.44788	12.4274	13.65	NA	10.4183	11.3741	NA	12.379	NA	13.697	12.2243	13.0855	NA	11.1748	NA	13.703	11.9906	13.1266	15.3674	11.4904	11.4698
11_GL0044803;20_GL0163289;6-3_GL0059447	NA	NA	NA	NA	NA	NA	NA	10.8279	NA	NA	NA	NA	13.0008	NA	NA	NA	NA	NA	NA	NA	13.1198	NA	NA	NA
11_GL0044818	NA	11.2893	NA	13.8831	13.1793	12.9147	NA	NA	NA	NA	NA	NA	13.1668	13.2409	14.6025	12.3922	14.1249	12.4181	13.9505	NA	14.18	14.5027	NA	12.6031
11_GL0044818;11_GL0135547	14.908	14.589	15.1068	15.6606	16.6458	16.6119	16.4331	16.293	15.9141	15.044	16.624	15.3002	16.8845	16.5993	16.3964	16.4891	16.1431	16.1556	16.6447	16.2598	17.6654	17.3156	16.6955	15.6079
1-1_GL0044924;11_GL0099668;MC-0-1_GL0059613;MC-0-1_GL0067284;S-Fe10_GL0092477	13.5867	14.6423	14.8727	16.0469	14.556	15.0343	12.4019	14.316	13.266	13.2487	14.201	12.9791	16.6656	14.6715	14.9339	13.5854	12.4472	12.0635	15.6073	13.9139	14.807	14.3841	12.8656	NA
1-1_GL0044926	NA	11.8107	NA	12.1639	11.4218	12.2538	NA	11.7148	NA	NA	NA	NA	12.294	NA	NA	NA	NA	NA	10.95	NA	11.1828	NA	NA	NA
1-1_GL0044926;MH-6-1_GL0022671	12.8382	15.1577	NA	15.4344	13.8523	14.7566	12.7163	14.3987	12.7217	12.0987	13.5616	12.8418	15.0944	13.7774	14.0502	13.3197	13.5139	12.372	14.5306	13.8107	13.8988	14.0817	13.2844	12.9069
1-1_GL0044927;MC-0-1_GL0035676	NA	12.0204	NA	12.1046	NA	13.0692	NA	12.2776	NA	NA	11.0107	10.9884	12.5578	NA	11.9375	NA	NA	11.4239	12.0275	11.3248	11.8856	11.3403	NA	NA
1-1_GL0044927;MC-0-1_GL0035676;S-Fe10_GL0092480	NA	NA	NA	NA	11.415	12.0187	NA	10.9663	NA	NA	NA	NA	11.0626	11.0572	11.1463	NA	10.4333	NA	11.207	NA	10.5467	10.838	NA	NA
1-1_GL0044932;MC-0-3_GL0046641;S-Fe10_GL0092485	14.4993	16.3476	15.5671	17.5769	16.414	16.5479	13.8601	16.0537	15.6454	14.1787	16.0183	14.1955	17.4764	16.3713	16.0374	14.5883	14.6244	14.3021	16.9836	15.5847	15.9333	16.36	14.4839	13.8173
1-1_GL0044935;13_GL0044720;20_GL0110213;MC-0-3_GL0013233;MC-6-4_GL0000222;S-Fe10_GL0092488;S-Fe1_GL0076123	NA	NA	NA	NA	NA	14.2359	NA	NA	NA	NA	NA	NA	14.9783	NA	NA	NA	NA	NA	NA	NA	14.0165	13.6219	NA	NA
1-1_GL0044935;13_GL0044720;20_GL0110213;MC-6-4_GL0000222;S-Fe10_GL0092488;S-Fe1_GL0076123	14.3725	NA	NA	NA	16.0967	NA	NA	NA	NA	NA	NA	NA	NA	NA	16.0258	NA	NA	NA	NA	NA	NA	NA	NA	NA
1-1_GL0044935;20_GL0110213;MC-0-3_GL0013233;MC-6-4_GL0000222;S-Fe1_GL0076123	12.1051	14.4739	12.9839	14.9386	13.3488	13.9922	11.2584	13.5778	NA	NA	13.1388	11.7846	14.6706	13.6164	13.1164	12.7993	NA	11.0693	13.8113	13.1548	12.6564	13.362	NA	10.96
1-1_GL0044942;1-7_GL0142767;10_GL0039980;16_GL0085211;1A-dyr2-07_GL0002766;4-1_GL0065984;G1-1A_GL0070528;Group2-1A_GL0005900;MC-0-1_GL0060606;MC-0-1_GL0079957;MC-6-3_GL0114701;MC-6-5_GL0012639;S-Fe10_GL0076451;S-Fe11_GL0089649	12.704	13.9738	12.8946	14.7478	12.725	13.1228	11.4283	NA	NA	11.7641	13.4302	NA	12.5818	13.0801	13.8139	12.1905	12.5191	11.56	14.4363	12.9651	NA	14.2829	NA	NA
1-1_GL0044942;MC-0-1_GL0079957;MC-6-3_GL0114701;S-Fe10_GL0076451	14.1148	15.8172	15.2347	17.2041	15.4374	15.8209	12.7542	14.7119	14.0333	12.8503	15.2949	NA	16.4097	15.3696	15.5928	14.3741	14.6461	12.7775	16.0835	14.0167	15.4903	15.7481	NA	12.754
1-1_GL0044942;MC-0-1_GL0079957;S-Fe10_GL0076451	12.8384	14.4223	13.3356	16.4428	14.2392	13.8612	12.0023	NA	13.6507	12.8941	13.0549	NA	14.7529	13.9899	12.6385	11.8971	13.481	NA	14.7493	12.4869	14.4425	14.1868	12.6836	12.7865
1-1_GL0044944	10.418	13.1423	NA	13.7742	12.7012	14.6167	11.2035	12.9998	11.0975	9.96765	13.5484	13.1467	12.2179	12.3539	11.3936	10.8024	10.6434	12.6594	12.726	13.865	12.6529	13.4519	NA	NA
1-1_GL0044944;MC-0-1_GL0079955;S-Fe10_GL0076449	NA	15.4909	16.8796	NA	14.8598	14.0115	11.2336	14.9981	13.6238	NA	15.1535	NA	16.5903	NA	15.943	NA	NA	11.8221	15.1808	NA	14.982	15.5024	11.9162	NA
11_GL0045555	NA	NA	14.368	NA	15.1335	14.8966	16.2881	14.7808	NA	NA	NA	NA	13.3707	15.0058	12.9328	16.4634	13.8156	13.9337	13.2628	13.7549	13.3888	14.5994	16.021	12.3171
11_GL0045555;4-7_GL0038201;S-Fe20_GL0153037	16.4994	14.9403	15.7644	15.2618	17.2057	17.2816	17.0249	16.7701	16.2211	15.7167	15.9386	15.0285	16.681	17.1354	16.4944	17.7999	17.3844	16.5469	16.9465	16.1822	17.0803	17.6427	17.207	16.5105
1-1_GL0045586	16.5559	18.1367	17.0725	17.7802	15.8638	16.9828	14.7919	16.5289	16.6442	15.0844	17.4762	14.9898	17.6201	15.8369	16.578	15.8597	16.1717	16.3433	17.0073	15.2209	16.2852	15.441	15.5879	16.2036
1-1_GL0045676	11.6712	11.3809	11.9308	NA	12.9021	12.8342	11.6636	10.7753	12.4446	14.813	NA	13.6525	12.7945	13.0401	14.3201	11.5015	12.1751	13.0975	NA	12.0461	13.2044	NA	NA	NA
1-1_GL0045676;1-7_GL0042718	NA	13.4385	11.8572	NA	13.6494	14.0023	12.3716	11.4845	14.6951	14.7699	13.5063	14.6589	14.7761	14.0351	14.8115	13.4081	13.4022	13.8762	11.7267	12.2529	13.5529	NA	15.46	14.7284
1-1_GL0045676;1-7_GL0042718;MH-6-3_GL0122153;MH-6-5_GL0107885;MH-6-5_GL0173924	NA	NA	NA	NA	NA	13.2619	NA	NA	12.6284	NA	NA	12.511	13.9099	NA	NA	NA	NA	NA	NA	NA	13.2002	NA	14.4062	NA
1-1_GL0045676;MH-6-3_GL0042215;MH-6-5_GL0107885	NA	11.5577	10.4318	11.1514	13.2647	12.2809	11.5143	NA	12.7427	15.2214	NA	14.6209	NA	13.5887	14.716	12.4208	12.2012	13.7424	NA	12.5828	13.6061	NA	NA	NA
1-1_GL0045676;MH-6-5_GL0107885	NA	13.216	12.9399	12.5955	14.2793	14.1995	12.9238	12.3779	13.7251	16.1849	NA	14.9194	14.2978	14.3564	15.9003	12.739	13.6664	14.535	10.9208	13.3844	14.3776	NA	NA	NA
11_GL0045958;1A-dyr2-07_GL0001240;1A-dyr4-07_GL0045295;20_GL0054158;26_GL0139638;2A-dyr14-07_GL0040025	13.6354	NA	NA	NA	NA	NA	NA	NA	NA	14.2578	NA	NA	NA	NA	15.2255	NA	NA	NA	NA	NA	NA	NA	NA	NA
11_GL0045958;26_GL0139638	NA	NA	NA	12.2151	NA	10.3187	NA	10.4696	11.1578	NA	NA	11.7705	NA	NA	NA	NA	NA	NA	NA	NA	NA	NA	11.4344	11.8555
1-1_GL0046107	NA	11.5173	13.1072	NA	11.8131	13.6651	NA	11.987	13.7411	NA	11.8604	NA	NA	NA	NA	NA	13.7694	12.278	14.8031	NA	NA	NA	NA	NA
1-1_GL0046107;4-1_GL0019852;Group2-8A_GL0037214	11.2509	12.5517	13.7128	12.3721	16.2161	15.2453	14.1998	15	14.5519	12.638	NA	12.5556	16.9362	15.9711	14.808	12.1313	14.8344	14.6273	14.8222	NA	16.12	14.2695	15.1769	14.0734
1-1_GL0046574	NA	NA	NA	10.2194	NA	NA	NA	NA	NA	NA	NA	NA	NA	NA	NA	NA	NA	NA	NA	NA	NA	NA	NA	NA
1-1_GL0046574;1-1_GL0068022;1A-dyr1-07_GL0037352;4-6_GL0073545;6-1_GL0078460;G1-5A_GL0075504	13.275	13.2795	13.4529	13.4712	14.1171	13.9645	12.5326	12.5597	13.8837	12.1548	13.9944	13.1783	13.6202	13.8876	14.0177	13.0155	13.7362	13.3123	14.8025	13.912	14.5142	13.103	NA	12.752
1-1_GL0047300;11_GL0134598;1A-dyr4-07_GL0009278;2-1_GL0009413;2-1_GL0087633;2-4_GL0080874;20_GL0116599;3-5_GL0046732;5-3_GL0001484;5-8_GL0054043;6-4_GL0078596;7-6_GL0114556;7_GL0110546;8-4_GL0080717;G1-1A_GL0058578;Group2-3A_GL0085686;Group2-3A_GL0108781;Group2-6A_GL0076600;S-Fe10_GL0162607;S-Fe12_GL0083542	13.6501	12.0292	13.3181	NA	14.5835	NA	14.0301	NA	13.2118	NA	14.3963	13.3851	15.5774	14.7127	14.6698	14.3639	13.6924	NA	16.0086	14.3123	14.8026	14.7696	14.0056	13.2544
1-1_GL0047300;2-1_GL0009413	NA	NA	NA	9.73684	13.3036	12.7585	14.0252	12.1564	NA	11.5171	NA	NA	13.3884	13.643	14.5046	12.5481	NA	12.3391	NA	NA	12.8817	12.5117	10.5983	NA
1-1_GL0047300;2-1_GL0009413;2-1_GL0087633;3-5_GL0046732;5-3_GL0001484;5-8_GL0054043;6-4_GL0078596;7-6_GL0114556;7_GL0110546;G1-1A_GL0058578;Group2-3A_GL0085686;Group2-3A_GL0108781;S-Fe10_GL0162607;S-Fe12_GL0083542	NA	NA	NA	NA	13.4713	13.2868	12.9083	13.1222	NA	NA	NA	NA	15.1142	13.3651	14.018	NA	NA	12.0843	12.7145	NA	13.5632	14.1357	12.1028	NA
1-1_GL0047300;2-1_GL0009413;S-Fe12_GL0083542	11.5829	NA	10.7332	NA	11.6966	10.4171	11.6356	11.1016	NA	NA	11.3289	11.7413	NA	12.0426	11.7169	NA	10.2631	11.1161	NA	11.6662	10.5035	NA	NA	10.619
1-1_GL0047300;2-1_GL0087633	NA	NA	NA	NA	13.4253	NA	NA	12.4353	12.2841	NA	NA	11.7218	13.2575	13.2323	NA	NA	12.5346	NA	13.9414	12.8181	13.9485	NA	15.6811	NA
1-1_GL0048366	NA	NA	NA	NA	12.7743	NA	NA	11.5799	NA	NA	NA	10.795	12.2157	12.4038	NA	NA	NA	NA	NA	NA	12.4217	12.5317	NA	NA
1-1_GL0048366;6-6_GL0089718	17.1127	11.981	15.1283	NA	13.9496	16.0784	15.0735	14.4041	12.3808	13.2646	NA	13.4265	14.1537	14.0526	14.5962	13.3986	12.971	13.9988	13.5384	14.3616	14.6151	16.2188	14.6531	12.1713
11_GL0048662	12.7849	NA	13.5696	NA	13.5798	13.5956	14.4923	14.3849	NA	NA	NA	12.5784	12.9638	13.5468	13.1866	15.1378	NA	13.516	12.7658	14.1358	13.8438	12.0869	15.1308	12.5198
11_GL0048685;11_GL0139961;11_GL0143116;20_GL0147742;3-2_GL0019842;31_GL0073464;4-1_GL0005066;6-7_GL0016691;7-5_GL0149953;8-3_GL0101808;Group2-7A_GL0036496;MH-6-4_GL0067558;S-Fe12_GL0189724;S-Fe2_GL0146242	18.362	17.6699	20.5486	19.1503	21.0648	NA	20.786	NA	NA	19.0424	NA	NA	NA	21.1449	21.4507	21.616	20.8349	NA	21.4174	20.406	NA	NA	21.1168	NA
11_GL0048685;11_GL0139961;20_GL0082096;20_GL0126153;3-2_GL0019842;3-3_GL0088496;4-3_GL0063749;4-8_GL0060722;5-4_GL0117453;6-7_GL0016691;Group2-7A_GL0036496;S-Fe2_GL0133793;S-Fe6_GL0005610	NA	16.8403	NA	17.438	14.7824	NA	NA	17.6698	13.9033	NA	NA	13.4797	17.1792	14.9007	NA	17.4988	13.4647	14.0001	15.3295	NA	18.3316	15.8437	13.9331	NA
11_GL0048685;11_GL0143116;20_GL0147742;3-2_GL0019842;3-3_GL0088496;4-8_GL0060722;Group2-7A_GL0036496;S-Fe6_GL0005610	NA	NA	NA	NA	NA	12.5218	NA	11.5884	NA	NA	NA	NA	11.6265	NA	NA	12.3745	NA	11.0443	NA	NA	11.2149	14.3315	NA	NA
11_GL0048685;20_GL0082096;3-2_GL0019842	13.1714	12.6459	14.6837	13.9218	10.876	14.8132	12.4711	13.8978	NA	NA	10.9146	NA	12.1369	10.92	8.03198	14.1947	NA	11.4196	12.4963	11.7428	12.1186	11.0362	14.0372	NA
11_GL0048685;20_GL0082096;S-Fe6_GL0005610	17.8976	20.5993	19.3893	20.8429	12.4077	20.0456	11.6704	16.7297	11.0921	13.6249	14.7367	11.6913	16.2111	12.4063	13.2696	12.1026	13.6671	14.9284	15.1782	16.2606	10.1008	13.9198	11.0244	13.4471
11_GL0048685;3-2_GL0019842;3-3_GL0088496;4-8_GL0060722	NA	NA	16.2308	14.4822	13.5666	13.7281	11.1601	12.7963	NA	NA	NA	NA	14.875	13.5255	11.3007	16.3325	NA	15.1268	13.1277	14.9167	14.2008	14.8877	16.3767	NA
1-1_GL0048765	15.1123	14.1613	14.965	14.5818	17.5805	16.5087	18.5314	NA	NA	14.7407	16.3127	NA	NA	17.5828	17.6347	16.2657	16.83	16.5023	NA	16.9365	NA	16.8435	16.9975	16.3402
1-1_GL0048765;1-1_GL0092522;1-2_GL0125305;11_GL0041387;1A-dyr4-07_GL0009722;2-3_GL0002598;2-8_GL0005311;3-1_GL0086169;3-5_GL0005950;3-5_GL0037612;3-5_GL0070222;32_GL0111881;4-1_GL0007488;4-2_GL0086461;4-4_GL0083540;4-7_GL0089492;43_GL0029674;5-2_GL0024931;5-6_GL0012253;5-6_GL0015745;6-5_GL0072187;7-5_GL0167262;8-1_GL0074410;8-6_GL0099766;G1-1A_GL0021347;G1-5A_GL0103365;Group2-3A_GL0127546;Group2-…	16.8322	16.1583	16.6503	15.7531	18.7736	18.6835	18.3932	18.4799	17.8928	16.7482	16.5577	17.2999	19.5328	18.198	18.807	17.4361	18.2727	18.0142	18.366	17.9396	19.0985	18.8996	18.1361	17.0282
1-1_GL0048765;1-1_GL0092522;1-2_GL0125305;1A-dyr4-07_GL0009722;2-3_GL0002598;2-8_GL0005311;3-1_GL0086169;3-5_GL0005950;3-5_GL0037612;3-5_GL0070222;32_GL0111881;4-1_GL0007488;4-2_GL0086461;4-4_GL0083540;4-7_GL0089492;43_GL0029674;5-6_GL0012253;5-6_GL0015745;6-5_GL0072187;8-6_GL0099766;G1-1A_GL0021347;G1-5A_GL0103365;Group2-3A_GL0127546;Group2-4A_GL0043711;MC-0-1_GL0057791;MC-6-2_GL0001188;MC-6-2_G…	NA	NA	NA	NA	NA	NA	NA	12.864	NA	NA	NA	NA	NA	NA	NA	NA	NA	NA	NA	NA	NA	NA	NA	NA
1-1_GL0048765;1-1_GL0092522;1-6_GL0017811;11_GL0041387;2-3_GL0002598;32_GL0111881;4-4_GL0083540;5-2_GL0024931;6-5_GL0072187;7-5_GL0167262;7-8_GL0106456;8-1_GL0074410;G1-1A_GL0021347;MC-6-2_GL0001188;MC-6-2_GL0009019	14.5169	13.7496	14.611	13.9873	16.6576	16.2961	15.0836	16.0867	14.0308	14.2725	15.8073	15.6692	17.3663	17.0074	16.831	15.6217	16.2791	16.3596	17.128	16.2382	17.0977	17.2436	16.2218	15.593
1-1_GL0048765;1A-dyr4-07_GL0092337;32_GL0111881	13.3157	9.13833	11.783	10.077	13.765	12.058	14.6332	12.3194	13.0083	12.1753	13.0991	13.2342	13.7255	13.8524	11.4069	11.1819	13.6756	13.6645	13.8442	14.4867	13.8819	NA	12.3514	13.4094
1-1_GL0048765;2-1_GL0031200;G1-1A_GL0021347;MC-6-2_GL0001188;MC-6-2_GL0009019;S-Fe5_GL0056502;S-Fe6_GL0118707	NA	12.0974	12.4532	13.2176	14.6767	NA	15.3727	NA	14.9025	13.8318	14.5266	14.4172	14.8218	14.7719	15.0183	14.3536	15.2046	NA	14.6767	NA	14.4756	NA	13.5894	14.6948
1-1_GL0048765;2-3_GL0002598	NA	NA	13.5275	NA	13.3691	NA	NA	NA	NA	NA	NA	NA	14.3826	13.6423	15.119	NA	NA	NA	NA	NA	13.2542	NA	NA	NA
1-1_GL0048765;4-4_GL0083540;4-7_GL0028961;4-7_GL0089492	NA	NA	NA	NA	12.5699	NA	NA	NA	NA	NA	NA	NA	NA	12.5509	NA	10.7999	11.8041	NA	NA	NA	NA	NA	NA	10.2385
1-1_GL0049429	13.4729	15.2015	13.675	14.4392	12.9211	14.0538	NA	13.1754	13.8351	12.236	13.5249	NA	14.4937	13.097	13.7091	11.4891	13.1672	NA	15.2518	13.4661	14.1094	14.4952	13.6344	NA
1-1_GL0049429;1-1_GL0077794;14_GL0013085;16_GL0033183;1B-dyr11-07_GL0022599;S-Fe10_GL0072606	14.0169	NA	14.5591	NA	14.0291	14.3195	11.5892	13.4646	13.8542	NA	14.7577	12.549	15.267	14.2168	15.4004	NA	13.3464	11.9143	15.2333	13.6116	14.2092	15.1361	13.3376	NA
1-1_GL0049429;1-1_GL0077794;16_GL0033183;1B-dyr11-07_GL0022599;S-Fe10_GL0072606	15.0473	15.2192	15.371	15.2026	13.4124	13.1396	11.5527	13.4306	12.8768	NA	14.2724	11.8501	13.4003	13.5467	13.9317	12.9719	12.9297	11.5848	14.5411	13.4003	13.4293	15.1862	13.2815	NA
1-1_GL0049429;1-1_GL0077794;S-Fe10_GL0072606	14.6024	14.8743	14.9417	NA	NA	13.4235	13.1962	NA	NA	12.6221	15.8812	NA	NA	NA	13.2058	NA	NA	12.902	14.7653	14.7303	NA	15.3552	NA	NA
1-1_GL0049429;16_GL0033183	15.9698	17.477	16.9547	17.0695	15.9224	15.503	13.2622	15.6656	15.8693	13.374	17.3923	14.2772	16.8391	15.9629	17.1238	15.1202	15.7111	13.8417	17.0889	15.9636	16.3999	17.2263	15.0052	NA
1-1_GL0049429;16_GL0033183;1B-dyr11-07_GL0022599	NA	NA	NA	NA	NA	NA	NA	12.0666	NA	NA	NA	NA	NA	NA	NA	NA	NA	NA	NA	NA	NA	NA	NA	NA
11_GL0049644	NA	NA	14.8663	12.9878	14.765	15.7514	16.1013	15.7566	13.4914	NA	NA	13.0873	13.2179	14.8058	13.6724	16.6774	NA	14.6599	NA	14.6177	13.8115	14.6419	16.0626	14.9747
11_GL0049644;4-7_GL0083512	NA	10.495	12.5243	11.4639	13.1623	14.1863	13.8271	13.8397	12.4284	11.4037	NA	11.9253	12.2677	13.4498	12.1698	14.4486	13.5849	12.5049	12.2533	12.0846	13.0886	13.1462	14.4653	13.2608
1-1_GL0050368	NA	NA	NA	NA	NA	NA	NA	NA	NA	NA	NA	NA	NA	NA	NA	12.7666	NA	NA	NA	NA	NA	NA	NA	NA
1-1_GL0050368;1-1_GL0086568	NA	NA	NA	NA	9.86641	15.7619	NA	12.1403	13.4842	NA	NA	NA	13.1419	NA	NA	NA	NA	NA	NA	NA	13.7399	12.0056	12.5439	NA
1-1_GL0050368;1-1_GL0086568;1-2_GL0114244;1-5_GL0034417;10_GL0057711;17_GL0116041;2-1_GL0009314;2-3_GL0063593;2-3_GL0102173;2-4_GL0039211;2_GL0102379;6-3_GL0013238;6-4_GL0029541;G1-1A_GL0044068;Group2-2A_GL0084888;Group2-8A_GL0032869	18.2808	17.1282	17.0227	16.8936	18.1663	17.8315	19.2812	NA	18	16.297	18.1295	NA	18.6494	18.2449	19.2199	17.2641	17.3736	17.827	19.1109	18.4464	NA	18.0742	18.3927	17.0041
1-1_GL0050368;1-1_GL0086568;1-5_GL0034417;17_GL0116041;2-3_GL0063593;2-4_GL0039211;G1-1A_GL0044068;Group2-8A_GL0174081	14.733	15.821	14.1388	14.8695	15.2638	14.8431	15.3509	16.074	15.1173	14.9623	15.2762	14.9769	16.5142	15.0383	15.2716	15.3717	15.5887	15.3888	15.8789	15.7124	17.0624	14.7129	15.3413	14.6933
1-1_GL0050368;1-5_GL0034417;10_GL0057711;2-1_GL0009314;2-3_GL0102173;2-5_GL0003929;G1-1A_GL0044068;Group2-1A_GL0130487;Group2-8A_GL0032869	20.0011	16.263	17.3485	16.7694	19.0086	18.3881	20.5003	17.4511	18.0938	16.5212	18.5269	19.1403	19.1539	19.1033	19.4558	18.0465	18.0607	18.3517	19.2055	20.0631	19.144	16.8357	17.7586	17.7948
1-1_GL0050864	13.2255	12.6724	NA	13.0507	14.4537	14.1819	13.8783	13.7505	13.1148	NA	13.2194	12.4583	14.9434	14.324	14.2706	12.7541	13.5311	12.7791	14.307	13.5432	15.1699	15.6138	13.8261	13.3455
1-1_GL0050864;11_GL0132807	NA	12.6335	NA	12.7666	14.3369	15.6317	15.7479	13.3587	11.9479	14.0729	NA	NA	12.8611	14.3562	14.1456	13.8821	NA	NA	NA	13.0216	13.446	15.0511	12.6724	12.2711
1-1_GL0050864;11_GL0132807;S-Fe20_GL0135464	14.1583	13.8961	13.8132	13.5167	14.3836	14.8756	15.2065	14.4996	14.3597	14.2691	13.4573	14.4425	14.4635	14.4676	14.8679	14.3239	14.1048	14.1786	14.6398	14.7211	15.7787	15.7986	14.5544	13.0734
1-1_GL0050864;11_GL0132807;S-Fe7_GL0142498	13.0833	15.5519	11.7091	15.441	14.7665	15.7836	15.401	14.2367	13.2793	14.9893	13.1699	13.7957	13.9636	14.9191	14.8898	14.9043	12.8723	13.8451	13.5023	13.7054	14.8083	15.1145	13.7774	13.7902
1-1_GL0050864;1-2_GL0005357;11_GL0132807;1A-dyr2-07_GL0025321;2-2_GL0032163;2A-dyr16-06_GL0021101;3-5_GL0107671;4-3_GL0038994;4-7_GL0144837;5-4_GL0118669;5-7_GL0042872;6-1_GL0039873;6-3_GL0056201;6-4_GL0027646;6-5_GL0119485;6-6_GL0112695;8-2_GL0038578;8-4_GL0005749;G1-5A_GL0008401;G1-5A_GL0031161;Group2-4A_GL0005933;Group2-8A_GL0223719;S-Fe20_GL0135464;S-Fe2_GL0174696;S-Fe5_GL0016894;S-Fe6_GL0089…	15.7486	14.7962	15.4012	15.5029	17.0928	16.7765	18.0158	NA	17.0784	15.3067	16.6824	NA	NA	17.2993	17.5119	16.9058	16.6286	16.6458	17.0167	16.7101	NA	15.737	18.0708	15.9459
1-1_GL0050864;1A-dyr2-07_GL0072819;20_GL0150260;26_GL0110301;5-8_GL0094007;G1-1A_GL0054686;G1-1A_GL0096517;MH-6-4_GL0014461;MH-6-4_GL0043857;S-Fe10_GL0153182;S-Fe20_GL0078171	14.1998	14.0571	13.9663	14.1705	14.7713	14.8817	14.7972	14.4843	14.6596	11.5423	14.8209	12.9528	16.2198	14.8537	15.8194	13.8462	13.8946	13.4389	15.5807	13.8692	15.9025	15.8294	13.5633	12.8281
11_GL0051055	NA	12.9102	NA	NA	13.2927	13.561	13.381	NA	NA	NA	NA	NA	13.7015	13.3253	13.8914	13.924	NA	NA	NA	NA	14.1303	14.6015	13.9998	11.6145
11_GL0051055;6-6_GL0061156	12.0152	NA	NA	NA	11.682	13.8285	12.866	12.0062	11.0546	NA	NA	11.3869	12.2506	11.5066	12.708	11.6316	NA	11.8713	12.6815	12.8537	12.9205	14.6403	12.4106	NA
11_GL0051057	14.5544	13.9513	13.3511	13.3874	14.333	16.0625	15.3726	14.3802	13.7352	13.8569	13.4185	13.8938	14.3097	14.2998	14.6666	14.7255	13.0439	14.3734	14.39	14.7827	15.0807	15.9472	14.3076	12.6294
11_GL0051058;6-4_GL0027710	13.9495	15.6165	13.6658	15.4964	14.5935	15.002	13.852	14.0333	13.8324	13.9751	13.4198	14.3157	14.6475	14.8399	14.6373	14.5143	13.0315	13.6722	13.4966	14.2419	15.2447	15.4916	13.9766	12.9413
11_GL0051059;6-7_GL0081590	12.8432	12.7039	11.9224	12.1015	12.5654	14.2479	12.9354	12.3408	12.0282	11.423	11.6623	12.4489	NA	12.8324	12.9379	12.9873	11.5738	12.6884	12.8269	13.1604	12.7187	14.0496	NA	10.8036
11_GL0051060;1A-dyr2-07_GL0001243;1A-dyr2-07_GL0052714;1A-dyr4-07_GL0032849;1A-dyr4-07_GL0089322;2-1_GL0029805;2-5_GL0002629;2-6_GL0037079;2A-dyr16-07_GL0097355;3-1_GL0077018;4-3_GL0089082;6-2_GL0017797;6-2_GL0090396;6-4_GL0040307;6-7_GL0081591;7-5_GL0112816;8-1_GL0125340;G1-5A_GL0088889;G1-5A_GL0090444;G1-6A_GL0018306;Group2-1A_GL0085104;S-Fe20_GL0098308	17.5667	16.1214	16.5467	16.1608	18.1797	18.0196	18.4535	18.0338	17.7251	16.3666	17.4633	17.6648	18.1112	18.4564	18.278	17.4671	17.6007	17.4989	17.9308	17.8939	17.819	17.9997	17.5289	16.6904
11_GL0051060;6-7_GL0081591	13.9887	12.9845	13.3491	12.3265	13.5318	15.069	14.5822	14.0942	13.7789	14.7315	13.3533	13.8128	13.2788	13.5845	14.2813	14.0794	13.4168	13.9001	13.6792	14.2077	14.0518	15.256	14.8915	13.3769
1-1_GL0051357;1-2_GL0062480;1-3_GL0088824;1A-dyr4-07_GL0106171;6-7_GL0119670;8-7_GL0038526;Group2-8A_GL0147431	NA	NA	NA	NA	9.80421	10.3673	NA	8.91514	9.57106	NA	NA	NA	11.1614	9.67442	NA	NA	8.86161	NA	10.2687	NA	11.0513	10.0609	NA	7.69828
1-1_GL0051357;1-2_GL0113171;1-3_GL0088824;1A-dyr2-07_GL0068617;2-3_GL0019987;4-8_GL0033484;6-2_GL0022431;6-3_GL0101429;8-7_GL0038526;G1-3A_GL0068069;MC-0-1_GL0054221;MH-0-4_GL0089998	15.0873	13.344	13.7777	13.7746	16.3526	14.5653	15.505	13.8991	14.953	11.8859	14.3367	14.3902	16.6574	15.4195	15.7421	14.2648	14.4151	14.1	15.3354	14.8908	15.057	14.5339	14.2453	13.1357
1-1_GL0051357;1-3_GL0088824;1A-dyr2-07_GL0068617;1A-dyr4-07_GL0000364;2-3_GL0019987;20_GL0099725;4-1_GL0063373;4-8_GL0033484;6-2_GL0022431;6-3_GL0101429;8-7_GL0038526;MH-6-4_GL0109160	13.7404	NA	NA	NA	NA	NA	NA	NA	NA	14.1099	NA	NA	NA	NA	15.247	NA	NA	NA	NA	NA	NA	NA	NA	NA
1-1_GL0051357;1-3_GL0088824;2-3_GL0019987	13.7127	14.2307	14.2221	13.3551	15.2498	13.8673	14.0974	13.7653	15.1448	13.7993	13.7313	14.0736	16.6958	15.4519	15.3371	14.1844	14.9066	15.1402	15.9723	15.0105	15.7957	14.6182	14.0824	13.7135
1-1_GL0051357;1-3_GL0088824;2-3_GL0019987;8-7_GL0038526	NA	NA	NA	NA	NA	10.9556	NA	12.4196	NA	NA	NA	NA	13.2559	NA	NA	NA	NA	NA	NA	NA	11.3026	NA	NA	NA
1-1_GL0051357;1-3_GL0088824;6-3_GL0101429	12.2759	NA	11.9316	NA	14.1389	12.4412	13.1616	12.7124	12.8051	11.6001	12.8346	13.0483	14.6015	14.4024	13.766	12.5396	13.5326	14.2082	13.7191	13.9024	13.9476	11.4856	13.0628	13.0435
1-1_GL0051357;1-3_GL0088824;6-3_GL0101429;Group2-8A_GL0147431	NA	NA	NA	NA	NA	11.903	NA	11.6871	11.0929	NA	NA	NA	12.5149	NA	11.6413	NA	NA	NA	12.6868	NA	12.6716	10.9004	8.7267	NA
1-1_GL0052409;10_GL0045886;4-1_GL0005770;4-8_GL0089667;6-1_GL0028538;7-1_GL0066484;Group2-5A_GL0014163;S-Fe20_GL0189587	NA	14.0792	NA	NA	NA	NA	NA	14.8681	15.2844	NA	14.7588	NA	15.4431	NA	15.813	NA	NA	NA	15.3242	14.9696	NA	15.7768	NA	NA
1-1_GL0052409;1-1_GL0142365;34_GL0007329;4-1_GL0005770;4-2_GL0120044;4-8_GL0089667;6-1_GL0028538;7-1_GL0066484;7-6_GL0107477;Group2-5A_GL0014163;MH-6-3_GL0082285;S-Fe20_GL0189587	NA	NA	NA	NA	NA	NA	13.3246	NA	13.7919	12.0601	NA	NA	NA	NA	NA	14.0146	14.3642	NA	14.5641	13.799	13.0726	NA	13.1273	NA
1-1_GL0052409;S-Fe20_GL0189587	NA	NA	NA	NA	12.8895	NA	NA	12.985	NA	NA	12.0098	13.7149	12.507	12.9596	13.2711	13.818	13.4691	13.113	12.197	13.5762	NA	12.8714	12.9919	12.9133
11_GL0052466;11_GL0139331;2A-dyr14-07_GL0059822;4-7_GL0146230	10.8447	11.2278	12.9923	12.1315	13.8675	14.4298	14.3901	14.3824	12.6498	NA	11.8056	NA	11.8926	13.8167	12.3709	13.9095	13.7072	12.5864	12.4652	11.3733	NA	14.7978	14.5376	12.3182
11_GL0052466;2-1_GL0087623;2-1_GL0109054;2-2_GL0107972;2-5_GL0018695;2A-dyr14-07_GL0059822;5-2_GL0102413;6-1_GL0059396;6-3_GL0035381	NA	NA	NA	NA	NA	NA	NA	16.2162	NA	15.0762	NA	14.0428	NA	NA	17.2188	15.6831	NA	NA	NA	16.451	NA	16.343	NA	NA
11_GL0052466;2-1_GL0087623;2-1_GL0109054;23_GL0077745;26_GL0056783;2A-dyr14-07_GL0059822;4-1_GL0033815;4-7_GL0146230;4-8_GL0047587;5-2_GL0102413;7-1_GL0073646	16.7809	15.2827	16.3473	15.5752	17.4716	16.8431	17.181	16.3921	16.4103	14.4002	16.6801	15.814	17.8021	17.46	18.1677	17.0623	16.4184	16.0674	17.3449	17.1601	16.87	16.6735	15.8544	15.7058
11_GL0052466;2-1_GL0087623;2-1_GL0109054;23_GL0077745;26_GL0056783;2A-dyr14-07_GL0059822;4-1_GL0033815;4-8_GL0047587;5-2_GL0102413;7-1_GL0073646	14.9192	NA	NA	NA	NA	13.3541	14.8477	NA	13.5523	NA	13.7644	14.8435	14.7646	14.494	14.3821	14.0558	NA	13.3389	14.2946	15.2666	13.7426	14.548	NA	13.0468
11_GL0052466;23_GL0077745;26_GL0056783;2A-dyr14-07_GL0059822;4-1_GL0033815;4-7_GL0146230;4-8_GL0047587;7-1_GL0073646	11.8133	13.3816	12.7325	13.9583	14.965	15.1516	15.3169	14.9008	14.2699	12.7221	13.0579	12.1524	13.9276	15.0512	14.881	13.8997	15.4038	14.6048	13.7681	12.9399	14.1833	14.931	12.045	13.8058
11_GL0052466;23_GL0077745;26_GL0056783;2A-dyr14-07_GL0059822;4-1_GL0033815;4-8_GL0047587;7-1_GL0073646	NA	NA	NA	NA	NA	NA	NA	14.5717	NA	NA	NA	NA	NA	NA	NA	NA	NA	NA	NA	NA	NA	NA	NA	NA
1-1_GL0052826	NA	12.6021	NA	12.9167	NA	13.0084	NA	NA	NA	NA	NA	NA	NA	NA	11.8126	12.7233	13.2028	12.0909	NA	NA	12.1444	NA	NA	NA
11_GL0052988;S-Fe12_GL0086995	NA	NA	12.2044	NA	12.32	12.4501	14.3417	13.9771	NA	NA	NA	NA	11.4468	12.5499	13.0749	14.7733	NA	13.079	NA	12.9963	11.5169	NA	14.8365	NA
1-1_GL0053002;6-3_GL0019187;6-4_GL0111760	11.9287	12.585	11.7013	13.887	14.4697	NA	NA	NA	13.1051	13.2301	NA	12.8591	13.2883	NA	12.0841	NA	13.2791	NA	NA	NA	13.8953	13.6497	12.6525	14.3557
11_GL0053212	13.919	14.9483	13.0054	13.6436	NA	NA	11.9956	13.8858	10.5876	NA	13.9592	14.5989	12.8761	NA	NA	12.7222	11.9836	11.5577	13.457	13.4182	12.1245	11.7289	13.3771	12.6772
11_GL0053215	14.8784	15.9875	13.8454	14.071	NA	11.5697	11.8699	14.1936	11.7493	10.8569	14.2994	14.6844	13.0358	NA	12.1905	13.1854	13.2684	11.9319	13.3796	13.8375	12.4586	12.6296	13.8575	13.2476
1-1_GL0053280;1-1_GL0108808;20_GL0151793;38_GL0029624;MH-0-4_GL0053297;MH-6-3_GL0045414;S-Fe7_GL0106544	13.3289	14.237	13.5185	14.5659	14.8334	15.8728	14.2951	14.4621	14.8185	12.9412	NA	13.2546	16.1038	15.2226	15.3246	13.8429	13.4752	13.6473	15.7161	14.1446	15.5704	16.6369	12.5751	12.888
1-1_GL0053280;1-1_GL0108808;20_GL0151793;38_GL0029624;MH-6-3_GL0045414;S-Fe7_GL0106544	11.6346	12.177	9.27941	12.8011	12.6819	12.8918	12.487	NA	11.3773	NA	12.1278	9.92504	13.4576	12.9144	11.2624	10.3116	11.1347	NA	13.1669	11.632	13.3568	13.5408	NA	10.5275
1-1_GL0053280;1-1_GL0108808;20_GL0151793;MH-0-4_GL0053297;MH-6-3_GL0045414;S-Fe7_GL0106544	NA	NA	NA	NA	NA	11.686	NA	11.4839	NA	NA	NA	10.2209	12.3511	NA	NA	NA	NA	NA	NA	NA	11.1118	12.4519	NA	NA
1-1_GL0053280;20_GL0151793;38_GL0029624;S-Fe7_GL0106544	NA	NA	NA	NA	NA	12.5958	NA	NA	NA	NA	NA	NA	13.1669	12.009	12.5497	NA	NA	NA	12.1413	NA	NA	13.5498	NA	NA
11_GL0053374	NA	NA	NA	NA	11.1498	NA	NA	NA	16.1081	15.4392	NA	NA	16.1807	NA	14.665	NA	NA	NA	NA	NA	15.2706	11.2916	10.0118	NA
11_GL0053374;1A-dyr4-07_GL0028776;2_GL0025466;3-7_GL0067223;6-3_GL0057956;7-4_GL0040368	NA	NA	NA	NA	NA	NA	NA	NA	NA	NA	NA	NA	11.2814	12.4972	12.5921	NA	NA	NA	NA	NA	NA	12.2591	11.5278	NA
11_GL0053374;1A-dyr4-07_GL0028776;6-3_GL0057956	NA	NA	NA	NA	13.412	14.0095	NA	13.3754	13.6632	NA	NA	NA	14.0909	13.4891	12.5382	13.509	12.817	12.9426	13.4803	NA	13.8907	14.5968	12.7052	13.0429
11_GL0053374;6-3_GL0057956	16.5487	15.5645	15.2097	15.7827	16.7366	18.0825	13.8477	15.747	16.1605	16.0076	16.7422	14.3541	17.4725	16.9922	16.8426	17.0357	15.1536	16.6345	17.7057	16.1242	17.4055	19.3509	16.1484	17.0177
11_GL0053412	NA	NA	15.5143	NA	14.5966	15.1624	16.3099	NA	12.1034	NA	NA	NA	13.5177	14.8308	NA	17.3547	NA	NA	13.2879	NA	14.0248	NA	16.4202	NA
1-1_GL0053884	NA	12.6078	NA	13.291	13.2912	13.9371	12.6673	12.6256	NA	NA	13.2677	NA	13.3651	13.3933	13.9916	12.1656	NA	NA	NA	NA	13.2859	14.3222	NA	12.1001
1-1_GL0053884;1-5_GL0075367	12.1972	13.9085	13.2457	14.2581	14.6054	14.3262	13.4476	13.4238	13.0353	12.8354	13.3848	NA	15.2693	14.7803	14.8614	13.7886	12.6697	12.837	14.7536	12.8506	14.7346	15.6826	13.5004	12.8853
1-1_GL0053884;1-5_GL0075367;G1-3A_GL0082802;S-Fe11_GL0148593	12.9451	13.2134	12.9043	13.5496	14.8246	14.562	14.3908	13.192	13.5928	NA	14.5731	12.7712	16.3518	14.8372	12.9327	13.3265	13.1371	12.6433	15.3418	13.1506	15.1865	14.6477	12.2266	11.4367
1-1_GL0054161	NA	NA	NA	11.5014	12.3597	NA	11.1945	NA	NA	NA	11.72	NA	12.2935	11.9939	12.2751	11.9239	12.2272	11.971	12.6395	12.5047	NA	NA	NA	NA
1-1_GL0054161;11_GL0066347;38_GL0043757	12.695	12.9782	12.7966	13.2548	12.7058	14.4109	NA	NA	NA	NA	12.9504	NA	NA	NA	11.6338	12.6712	12.8833	12.5546	13.2212	13.1893	NA	NA	NA	NA
1-1_GL0054161;1-1_GL0073107;1-2_GL0115428;11_GL0021701;11_GL0066347;11_GL0139318;1A-dyr4-07_GL0083013;1A-dyr4-07_GL0090469;2-1_GL0033349;2A-dyr16-07_GL0057446;32_GL0088143;38_GL0043757;4-1_GL0057479;4-2_GL0077478;4-8_GL0028110;46_GL0035035;5-8_GL0048195;50_GL0015409;6-2_GL0055252;6-3_GL0098453;6-6_GL0043770;8_GL0053219;G1-5A_GL0067575;Group2-2A_GL0082298;Group2-3A_GL0036528;Group2-4A_GL0041798;Gr…	17.5302	17.0454	16.7494	17.3722	18.9094	19.0638	19.5753	19.1216	18.6399	17.6787	18.3574	17.994	19.6906	18.8948	19.056	18.4726	18.1039	18.675	19.153	18.4279	18.6152	18.8314	17.9561	18.1483
1-1_GL0054161;1-1_GL0073107;1-2_GL0115428;2-1_GL0033349;23_GL0097013;38_GL0043757;4-1_GL0023341;4-1_GL0057479;4-8_GL0028110;50_GL0015409;Group2-5A_GL0020455;MC-0-3_GL0011860;MH-6-4_GL0118888;S-Fe12_GL0213072	16.6007	16.1646	16.2503	16.6384	18.0864	17.7004	17.7822	17.4581	17.474	16.0504	17.3111	16.159	18.5629	18.1859	18.3442	16.7073	16.9657	16.8104	18.6154	17.1088	17.4896	17.3761	16.6386	16.3435
1-1_GL0054161;1-1_GL0073107;38_GL0043757;4-1_GL0057479;4-2_GL0077478;6-2_GL0055252;G1-5A_GL0067575;Group2-4A_GL0041798	15.3515	14.4105	14.9135	15.356	16.5964	16.445	16.1116	16.546	15.4118	14.4735	15.4998	14.6107	16.6038	16.7417	16.3782	15.3609	15.6672	14.9092	15.8052	15.678	15.7755	15.7157	14.5377	15.24
1-1_GL0054161;1-2_GL0095419;1-2_GL0115428;1-7_GL0113738;11_GL0066347;2-1_GL0033349;2-3_GL0105804;23_GL0012977;38_GL0043757;4-1_GL0013487;4-8_GL0028110;Group2-1A_GL0059452	17.72	15.8577	16.122	16.5053	18.3156	18.2987	18.6505	17.6654	18.5298	16.7594	18.2686	18.2293	19.4123	18.4116	18.4119	17.6691	16.6634	17.6416	19.4262	18.5454	18.6171	17.9845	17.1993	15.8104
1-1_GL0054161;1-2_GL0095419;2-1_GL0033349;38_GL0043757	NA	11.1718	10.3122	11.6304	13.284	12.5892	12.0797	10.9494	12.7715	NA	12.2571	11.9626	13.5876	13.2477	NA	12.7683	12.4132	NA	13.6454	12.605	12.3031	12.3418	11.2073	11.4759
1-1_GL0054161;1-2_GL0115428;4-2_GL0077478;6-2_GL0055252;G1-5A_GL0067575;Group2-3A_GL0036528;Group2-5A_GL0020455	13.4522	14.0713	14.5033	14.759	15.1444	15.3323	14.8879	14.9498	15.3386	14.2239	15.3197	14.6597	16.5476	15.2824	15.7687	15.315	15.6479	14.4154	16.171	14.9787	14.6907	14.6794	14.2516	14.0725
1-1_GL0054161;1-7_GL0113738;11_GL0066347;11_GL0139318;1A-dyr4-07_GL0083013;1A-dyr4-07_GL0090469;2-3_GL0105804;23_GL0012977;38_GL0043757;4-1_GL0057479;6-2_GL0055252;6-3_GL0098453;8_GL0053219;G1-5A_GL0067575;Group2-1A_GL0059452;Group2-2A_GL0082298;Group2-4A_GL0041798;S-Fe20_GL0180068	16.3612	16.3108	16.5782	16.2872	17.5189	17.518	16.9702	NA	18.3671	16.3364	17.1435	NA	15.3385	17.5938	16.2864	17.3044	16.79	16.2909	17.647	16.6978	NA	17.667	16.984	16.1284
1-1_GL0054161;1-7_GL0113738;11_GL0066347;11_GL0139318;1A-dyr4-07_GL0090469;2-1_GL0033349;2-3_GL0105804;23_GL0012977;4-1_GL0057479;4-2_GL0077478;6-2_GL0055252;6-3_GL0098453;G1-5A_GL0067575;Group2-1A_GL0059452;Group2-2A_GL0082298;Group2-3A_GL0036528;Group2-4A_GL0041798;Group2-5A_GL0020455;S-Fe20_GL0089803;S-Fe20_GL0180068	14.791	13.6987	14.6887	14.096	15.5398	14.4165	15.1267	14.2134	14.9294	13.8622	15.0097	15.6078	13.1748	15.6625	15.4044	14.3143	14.2852	13.988	15.5612	15.2223	15.683	13.808	14.4327	13.3616
1-1_GL0054161;2-1_GL0033349	NA	NA	NA	12.0333	NA	NA	NA	NA	12.6515	NA	NA	NA	NA	NA	NA	NA	NA	NA	NA	NA	NA	NA	NA	NA
1-1_GL0054161;2-1_GL0033349;38_GL0043757	12.4938	12.143	10.9103	13.1889	13.9971	14.0477	12.8979	13.2764	NA	11.9	13.3264	13.6365	14.0533	14.1738	12.4333	13.4245	13.5447	13.3649	14.421	13.7494	13.6592	13.7329	NA	13.6271
1-1_GL0054161;2-1_GL0033349;38_GL0043757;4-1_GL0057479	13.2953	14.268	14.0767	13.9266	15.2415	15.5152	14.2509	15.2201	15.094	13.3568	14.4612	14.6385	15.9524	15.2016	14.8821	14.9507	14.6718	13.8946	15.8703	14.7548	15.2901	14.8176	13.8646	13.8488
1-1_GL0054161;38_GL0043757	12.6284	11.2436	NA	12.3355	NA	NA	NA	NA	NA	NA	NA	NA	NA	NA	11.1481	11.4915	NA	NA	NA	NA	12.2469	NA	NA	NA
1-1_GL0054161;MC-6-2_GL0184418	NA	NA	NA	NA	13.4715	NA	13.4578	14.3296	NA	NA	NA	13.9316	13.5726	13.3724	13.7423	12.5914	13.3867	NA	13.9215	13.3338	13.1949	NA	12.0375	NA
1-1_GL0054742	NA	11.4422	11.5581	11.406	NA	NA	NA	NA	11.9857	NA	12.1348	11.0986	NA	NA	NA	NA	12.6048	11.5887	11.5336	12.1042	NA	NA	NA	NA
1-1_GL0054742;S-Fe10_GL0031926	11.6998	12.6966	NA	NA	11.8698	12.9955	11.1857	13.0089	12.5861	12.1807	12.6681	11.5062	11.4011	12.0121	12.5678	11.4482	NA	11.8183	13.1904	NA	12.0347	12.2461	11.7898	NA
1-1_GL0054810	NA	NA	NA	NA	15.1643	17.6197	15.1549	15.8559	NA	NA	NA	NA	NA	15.3487	NA	11.202	NA	NA	NA	NA	NA	NA	14.3537	NA
1-1_GL0054810;1-1_GL0104706	NA	NA	NA	NA	NA	NA	NA	14.7493	NA	NA	NA	NA	13.2299	NA	14.253	NA	NA	NA	NA	NA	NA	NA	12.0227	NA
1-1_GL0054810;1-1_GL0104706;20_GL0054119	NA	NA	NA	NA	NA	NA	NA	15.6764	NA	NA	NA	NA	NA	NA	16.388	14.6995	NA	NA	NA	NA	NA	NA	13.5404	NA
1-1_GL0054810;20_GL0054119	NA	NA	NA	NA	NA	NA	NA	NA	NA	NA	NA	NA	13.1634	NA	NA	NA	NA	NA	NA	NA	NA	NA	NA	NA
11_GL0054940	NA	NA	10.0692	8.40273	12.872	13.0326	13.0059	11.0528	10.5216	NA	NA	NA	NA	13.0782	NA	10.3694	12.0886	11.9834	NA	NA	12.1058	NA	NA	11.9471
11_GL0055314	15.9043	16.9611	14.6266	15.075	13.7549	12.5938	13.9516	16.1566	12.1759	12.5495	16.2785	15.7642	15.2623	13.7836	15.332	15.0074	15.6384	14.15	15.8567	15.846	14.9327	13.9683	16.4796	14.9464
11_GL0055314;11_GL0095758	14.988	NA	NA	NA	NA	NA	NA	15.6275	NA	NA	NA	15.3354	NA	NA	NA	NA	NA	NA	NA	NA	NA	NA	NA	NA
11_GL0055324	14.3893	15.5899	13.9523	13.9932	NA	NA	13.217	15.4991	NA	NA	15.3359	14.9422	14.5756	NA	14.6273	14.5738	14.1224	13.0711	14.9047	14.6638	14.0103	13.2023	15.7313	13.9615
1-1_GL0055364;1-1_GL0137106;1B-dyr12-07_GL0036906;3-4_GL0004010	NA	NA	NA	NA	NA	13.6269	13.3747	12.9887	13.9297	NA	NA	13.0396	12.7364	13.0501	NA	NA	NA	12.6612	NA	NA	14.2277	NA	NA	NA
11_GL0055390	NA	NA	NA	NA	17.2469	19.6222	19.4182	19.0405	NA	NA	NA	NA	NA	17.1814	NA	NA	NA	NA	14.7718	NA	15.8801	15.4871	NA	NA
11_GL0055390;3-3_GL0039961;S-Fe7_GL0275907	NA	NA	NA	NA	11.8061	13.0213	12.3184	NA	NA	NA	NA	NA	NA	11.2745	11.0992	12.7432	NA	10.3842	11.4704	10.9539	NA	NA	13.1878	NA
11_GL0055516	NA	11.4184	NA	NA	10.9882	12.9438	12.0106	11.6881	NA	12.8842	NA	10.8993	NA	11.1596	11.6716	12.1486	NA	10.9726	10.5327	9.73602	NA	11.6701	11.5148	11.3872
11_GL0055890	16.7714	14.8181	15.6062	15.4814	16.375	16.4783	17.9538	17.6547	16.3852	17.1152	15.9285	14.8378	15.8098	16.145	16.288	18.7286	14.5032	13.7298	16.8267	15.7725	14.9119	12.125	16.697	16.491
11_GL0055890;Group2-8A_GL0161168;S-Fe20_GL0059760	15.8103	14.969	16.6951	15.5655	16.5469	18.1021	17.7808	17.4878	16.6677	17.3867	16.4842	16.4724	17.5447	16.7571	16.8776	17.7877	16.274	16.8201	15.7785	16.5251	16.4111	17.9519	17.1913	16.6227
1-1_GL0056183	15.3631	17.4944	16.6752	18.4567	15.8335	16.9813	NA	NA	NA	14.0914	16.9266	16.1427	15.9329	NA	15.8987	16.7828	16.2028	17.2393	16.8401	15.6933	17.3718	15.1885	NA	14.9804
1-1_GL0056183;11_GL0121511;31_GL0073464;4-7_GL0021685;6-2_GL0081925;6-4_GL0007852;6-6_GL0108256;6-7_GL0098660;G1-1A_GL0104822;Group2-4A_GL0058042;Group2-7A_GL0140882;MH-6-5_GL0039873;S-Fe6_GL0098161;S-Fe9_GL0141162	17.2078	16.7933	17.1735	18.9118	17.5235	18.2173	18.08	NA	17.3202	16.8829	18.2981	NA	18.6764	17.9261	18.5378	16.6838	16.3745	18.5177	18.0082	16.7222	13.2455	17.4702	18.1336	15.9509
1-1_GL0056183;3-1_GL0097688;6-2_GL0061949	NA	20.5189	NA	21.4786	NA	NA	NA	20.8692	NA	NA	NA	NA	NA	NA	NA	20.5318	NA	19.4393	NA	NA	20.7257	NA	NA	NA
1-1_GL0056201;1-1_GL0096134;10_GL0063529;2-3_GL0101637	13.9278	16.0249	15.27	15.5907	15.6431	16.1918	11.776	15.6003	17.2416	14.8843	15.0845	13.2598	15.1721	15.7215	15.7282	15.8894	17.7759	16.5908	16.4862	14.7545	16.4147	11.4258	12.2905	15.1574
1-1_GL0056201;2-3_GL0101637	11.6396	13.1724	NA	13.2062	NA	NA	NA	NA	NA	NA	14.9545	10.9878	NA	NA	12.549	14.1099	NA	13.6308	NA	NA	13.1239	NA	NA	NA
11_GL0056847	NA	NA	NA	NA	NA	NA	NA	NA	NA	NA	NA	NA	NA	NA	NA	NA	14.2476	NA	NA	NA	13.6104	NA	NA	NA
11_GL0056847;2-1_GL0029142;2-1_GL0063176;2-3_GL0010267;20_GL0113866;5-2_GL0034803;5-3_GL0027563;5-7_GL0107427;8-2_GL0008556;8-3_GL0065252;S-Fe20_GL0014220;S-Fe7_GL0182431	16.1461	14.1385	14.4406	14.4054	16.1165	15.527	17.0192	15.3419	15.3635	14.9031	15.6086	15.7285	16.4095	16.1096	16.9483	15.2982	15.4171	15.56	16.5023	16.2857	16.5992	15.776	15.6018	14.9705
11_GL0056847;2-1_GL0029142;2-1_GL0063176;2-3_GL0010267;20_GL0113866;5-2_GL0034803;5-3_GL0027563;8-2_GL0008556;8-3_GL0065252;S-Fe20_GL0014220	15.0784	12.824	NA	13.0999	15.0366	14.2333	15.8023	13.8401	13.9525	13.8243	13.3946	14.1981	14.6745	15.1434	13.6599	13.629	14.7387	13.8773	15.0479	14.8034	15.2848	14.6917	13.8301	14.6512
11_GL0056847;2-1_GL0029142;2-1_GL0063176;2-3_GL0010267;20_GL0113866;5-2_GL0034803;5-3_GL0027563;8-2_GL0008556;8-3_GL0065252;S-Fe20_GL0014220;S-Fe7_GL0182431	17.0789	15.2381	15.3188	15.6104	17.4918	16.5062	18.4914	15.7676	16.017	15.1604	16.437	16.1156	17.581	17.3892	15.6388	15.9975	15.9353	16.0222	17.8064	16.9678	17.4843	16.7276	16.4213	15.8085
11_GL0056847;5-3_GL0027563;5-7_GL0107427;8-2_GL0008556;8-3_GL0065252;S-Fe20_GL0014220;S-Fe7_GL0182431	13.3327	12.7101	12.9969	13.0233	14.3792	13.8164	14.7348	14.0565	13.2926	13.3439	13.1192	14.3783	14.9431	14.329	14.9533	14.1879	14.1411	14.2482	15.1326	14.3379	14.3254	14.7795	14.4463	13.6061
11_GL0056847;5-7_GL0107427;8-2_GL0008556;8-3_GL0065252;S-Fe20_GL0014220	NA	NA	NA	NA	12.6863	NA	NA	NA	12.9821	NA	NA	NA	NA	12.9704	NA	NA	12.7739	NA	NA	NA	13.064	NA	13.1284	13.6206
11_GL0056847;5-7_GL0107427;8-2_GL0008556;S-Fe20_GL0014220;S-Fe7_GL0182431	14.2955	13.9669	13.531	13.9807	15.1113	15.1093	15.5469	14.7042	14.4441	13.4678	14.3959	13.7141	15.4308	15.0211	15.7158	14.3453	14.747	14.6886	15.3322	14.5534	14.9085	15.8414	14.3795	14.3809
11_GL0057177	NA	NA	NA	NA	NA	NA	NA	NA	NA	NA	NA	NA	12.1593	NA	NA	NA	NA	NA	NA	NA	NA	NA	NA	NA
11_GL0057242	NA	NA	16.0983	NA	14.3739	15.1915	14.7469	15.2442	NA	NA	NA	NA	12.3467	14.5632	12.4571	16.8002	NA	13.5277	NA	14.1067	13.265	NA	16.6838	NA
1-1_GL0058523	NA	NA	NA	NA	NA	NA	NA	NA	NA	NA	NA	NA	NA	NA	11.7875	NA	NA	NA	NA	NA	12.6516	NA	NA	NA
1-1_GL0058523;1-1_GL0094844;17_GL0102395;47_GL0084449	NA	11.5212	NA	NA	NA	12.3193	NA	NA	NA	NA	11.8217	NA	NA	11.9457	12.5859	11.2707	NA	NA	NA	NA	12.1762	12.4614	NA	NA
1-1_GL0058523;1-1_GL0094844;17_GL0102395;47_GL0084449;7-8_GL0159691;S-Fe20_GL0010689	NA	9.2578	9.47135	NA	10.7859	10.9365	10.3339	NA	9.82938	NA	10.4382	NA	11.4889	NA	11.2306	9.97625	NA	NA	11.5374	NA	10.5571	10.8846	NA	NA
11_GL0058639	NA	13.9993	15.6329	18.0505	NA	18.8095	NA	16.151	16.0214	16.0647	14.0388	NA	NA	NA	NA	NA	NA	NA	NA	14.344	NA	NA	NA	NA
1-1_GL0058790	NA	13.4685	12.8866	NA	13.0111	12.6551	13.0309	15.3253	11.713	12.8999	13.3708	12.566	13.0612	12.8214	12.0677	NA	NA	NA	13.2215	13.0785	14.5948	13.1999	13.5646	NA
11_GL0059124	13.2797	9.72273	13.8701	12.8813	16.3641	14.7919	15.1897	14.6919	14.5376	13.1647	12.967	13.677	15.898	16.3793	14.9834	15.2227	16.6611	16.8855	13.5118	14.6204	16.3026	11.2117	15.4878	16.3221
11_GL0059124;1_GL0086419;2-1_GL0009701;2-1_GL0024478;2-1_GL0066566;2-1_GL0121718;G1-5A_GL0071216;G1-5A_GL0190133	NA	NA	NA	NA	NA	NA	NA	NA	NA	NA	NA	NA	NA	NA	15.3709	NA	NA	NA	NA	NA	NA	NA	NA	NA
11_GL0059124;1_GL0086419;2-1_GL0024478;2-1_GL0121718;G1-5A_GL0071216	17.9365	14.8281	16.3744	14.6725	18.2678	17.6119	19.4019	16.8336	17.0589	15.9793	17.6765	18.3687	17.3901	18.7445	NA	16.6751	17.2587	NA	17.9835	18.5938	18.0025	16.1731	16.3275	16.916
11_GL0059124;1_GL0086419;2-1_GL0024478;G1-5A_GL0071216;G1-5A_GL0190133	NA	NA	NA	NA	NA	NA	12.8457	NA	NA	NA	NA	11.1433	NA	NA	NA	NA	NA	9.65506	10.6558	12.3355	12.4108	NA	NA	NA
11_GL0059124;11_GL0153046;1_GL0086419;2-1_GL0024478;2-1_GL0121718;3-5_GL0056574;4-2_GL0116016;5-1_GL0023970;8-5_GL0105757;G1-5A_GL0071216	14.6425	11.0357	13.9117	12.6169	15.8303	15.354	16.0076	15.7489	12.7613	12.3025	14.9335	14.6233	15.0951	15.6744	15.1067	15.3869	15.506	15.2472	15.1335	14.7434	15.4195	14.1998	15.0791	14.3634
11_GL0059124;2-1_GL0009701;2-1_GL0024478;2-1_GL0121718;G1-5A_GL0071216	16.8979	13.5189	14.7438	13.7801	17.1547	15.6932	17.4817	15.147	16.1354	15.0595	16.2611	16.9237	16.4096	17.0426	16.9388	15.704	16.2606	16.0925	16.6872	17.2003	16.4919	13.9415	14.8512	16.0636
11_GL0059124;2-1_GL0024478;G1-5A_GL0071216	NA	NA	NA	NA	13.1798	12.9207	12.9798	NA	NA	NA	NA	NA	NA	14.0337	12.8306	NA	11.7841	NA	11.8113	NA	12.7916	12.7405	NA	11.5943
11_GL0059124;G1-5A_GL0071216	NA	NA	12.415	NA	14.6268	13.8767	14.5118	NA	12.9361	NA	NA	NA	NA	14.7541	11.824	12.4089	12.5281	12.4821	12.6458	12.0405	14.148	NA	NA	12.0492
11_GL0059162;6-7_GL0040133;Group2-1A_GL0088141	14.526	13.1914	12.8444	12.9518	15.0037	14.9751	14.8991	14.0164	14.389	14.1134	14.1824	13.9784	15.0646	14.8555	14.7503	14.8229	14.4291	14.3872	15.1031	14.1228	15.4486	16.6027	14.0241	15.519
1-1_GL0059506	13.9625	12.8033	NA	NA	13.7162	15.1717	NA	16.3439	14.9091	12.7867	14.0887	13.7106	13.1	13.8347	13.9767	12.2702	NA	14.3707	14.322	13.0398	13.6286	NA	13.8283	12.8736
1-1_GL0059506;32_GL0135097	NA	NA	NA	NA	12.1515	12.3702	NA	14.9231	12.8518	NA	12.4953	12.7458	11.8784	12.1451	11.9696	NA	NA	NA	12.7708	NA	12.3049	NA	12.3155	10.3782
11_GL0059511	13.4379	14.388	12.727	12.631	NA	NA	11.8485	12.7403	NA	NA	13.4785	13.0719	12.8127	10.9728	11.6987	NA	11.6416	11.3468	12.3213	12.7638	12.0513	11.5734	13.1361	12.0941
1-1_GL0059591;2-1_GL0086497;4-1_GL0063821;Group2-8A_GL0094649;MC-6-2_GL0056698;S-Fe10_GL0012246	13.7849	13.8263	NA	13.6935	15.1207	14.2416	14.4837	12.8246	14.1738	13.1845	13.8564	13.6457	15.6096	14.9864	14.0294	12.0794	14.9848	13.0372	15.2994	14.0162	15.7113	14.2749	13.4751	13.8399
1-1_GL0059591;2-1_GL0086497;4-1_GL0063821;Group2-8A_GL0094649;S-Fe10_GL0012246	15.3886	14.7493	15.0822	15.2105	16.5157	15.7077	15.6532	15.1709	16.1648	14.7183	15.9423	15.8101	16.0669	16.6202	16.1249	15.8628	15.8137	15.467	16.249	16.4261	16.4797	15.4884	15.2246	14.8703
1-1_GL0059591;2-1_GL0086497;Group2-8A_GL0094649	12.0198	10.3628	10.6101	11.1038	14.0345	13.5637	13.4984	13.043	13.2116	10.4945	12.9943	13.4053	15.0059	13.8256	13.9133	12.3813	12.821	11.8288	13.9723	13.3806	14.8798	13.1012	12.8894	11.9163
1-1_GL0059591;4-1_GL0063821;Group2-8A_GL0094649;MC-6-2_GL0056698	NA	NA	NA	NA	12.0334	NA	NA	NA	11.9332	NA	NA	NA	NA	NA	NA	NA	12.257	NA	11.6121	NA	11.8966	NA	NA	NA
1-1_GL0059591;Group2-8A_GL0094649;MC-6-2_GL0056698	11.2897	12.8251	11.9987	NA	12.5088	NA	12.4185	NA	13.7706	12.232	12.0737	NA	NA	12.8492	12.6874	NA	14.2013	12.333	14.2109	NA	NA	NA	NA	NA
1-1_GL0059664	NA	NA	NA	NA	NA	NA	NA	11.6095	10.7168	NA	NA	NA	NA	12.1419	NA	NA	NA	NA	NA	NA	12.638	NA	12.8873	NA
1-1_GL0059664;2-1_GL0026444;2-1_GL0102347;2-8_GL0072129;8-8_GL0083723;S-Fe7_GL0053794	NA	NA	NA	NA	NA	13.4892	15.6196	13.3784	14.0025	13.4327	NA	15.6251	15.221	NA	NA	NA	NA	NA	14.5716	14.6143	14.9543	NA	13.9885	NA
1-1_GL0059664;6-2_GL0051646	12.6425	NA	NA	10.2599	11.7157	NA	12.5758	11.6826	11.932	NA	12.0334	15.7584	12.4213	12.4456	10.8989	10.4892	12.1451	11.8348	11.4407	13.4441	11.8982	11.3836	12.7372	12.0038
1-1_GL0060069	12.9573	12.3842	12.0662	14.1912	14.6975	14.725	13.8751	14.4755	12.7536	11.6105	13.9387	12.7237	14.7257	14.6715	14.0572	13.9463	13.217	12.1565	14.0318	13.7914	14.9446	15.1783	12.5999	14.0036
1-1_GL0060069;11_GL0037479;S-Fe7_GL0276527	15.5814	14.9064	14.1025	14.4421	16.2113	18.4514	17.6093	16.3242	14.8972	16.996	15.726	14.2327	16.1988	16.4131	16.5003	16.1823	15.0493	15.8425	16.2897	16.1894	17.0122	18.6349	16.2273	14.9091
1-1_GL0060070	12.6008	11.881	11.3352	14.2378	14.6168	14.8373	13.6534	14.3637	12.6684	NA	13.448	12.7446	14.3197	14.5147	13.8255	13.7574	13.1748	NA	13.557	13.6963	14.7208	15.1426	12.6854	14.0426
1-1_GL0060071	12.0218	11.6816	11.6008	13.4767	13.3047	13.6196	12.4418	13.4464	12.1032	11.7619	12.849	12.0278	12.9177	13.397	12.6315	12.9214	12.6209	NA	12.3361	12.5224	13.5335	13.505	12.039	13.2257
11_GL0060737	NA	NA	15.4449	12.9268	14.5844	14.537	15.7105	15.8675	NA	NA	NA	NA	13.7346	14.6629	12.935	17.4965	NA	14.5928	12.9411	14.5668	14.3167	NA	17.58	NA
11_GL0060737;2-4_GL0063036;2-6_GL0065005	15.2554	NA	13.8483	NA	13.2321	13.0389	14.8694	14.5333	NA	NA	14.9232	16.0534	12.5987	13.6764	12.562	15.5799	12.8113	13.6608	14.4502	15.8933	13.076	NA	15.6911	NA
11_GL0060737;47_GL0080996	NA	NA	NA	NA	16.1453	16.4124	17.5264	17.1794	NA	NA	NA	NA	17.1071	16.2526	16.7046	NA	14.9642	NA	16.6574	NA	14.3051	NA	NA	NA
1-1_GL0061105	NA	NA	NA	NA	NA	13.2506	NA	13.4483	NA	NA	NA	NA	NA	11.9829	NA	NA	NA	NA	NA	NA	NA	13.8657	NA	NA
1-1_GL0061105;1-8_GL0026789;Group2-7A_GL0097738;MC-6-3_GL0049508;MC-6-5_GL0000703;MH-6-3_GL0079845	NA	NA	NA	NA	12.1856	13.8174	12.8107	13.1652	12.1909	NA	NA	NA	13.0895	NA	11.9351	NA	NA	11.5989	NA	NA	12.2297	15.0813	10.7572	NA
1-1_GL0061105;1-8_GL0026789;MH-6-3_GL0079845	NA	NA	NA	NA	NA	NA	14.4129	NA	NA	NA	NA	NA	13.8623	13.4504	14.8608	NA	NA	NA	13.0729	NA	NA	NA	NA	NA
1-1_GL0061374;1-1_GL0141556;1-2_GL0053410;10_GL0077403;11_GL0015307;11_GL0045958;11_GL0070423;1A-dyr2-07_GL0001240;1A-dyr4-07_GL0045295;2-4_GL0088899;2-5_GL0052916;20_GL0054158;26_GL0139638;2A-dyr14-07_GL0040025;2B-dyr19-06_GL0035065;2_GL0122601;3-1_GL0061747;3B-dyr36-06_GL0048615;4-2_GL0096140;5_GL0165385;6-4_GL0109250;7_GL0028329;8-1_GL0072991;G1-1A_GL0100166;Group2-2A_GL0072583;Group2-6A_GL003…	16.1899	15.0542	15.7251	15.3196	16.6519	17.2791	16.6976	14.6702	NA	15.1286	15.6822	17.2712	17.8787	16.5525	16.567	16.2103	15.523	15.5106	16.4692	16.4143	14.2193	16.6221	16.0553	16.4576
1-1_GL0061374;1-1_GL0141556;1A-dyr3-06_GL0023526;2B-dyr19-06_GL0035065;3-1_GL0061747;3B-dyr36-06_GL0048615;5_GL0165385;6-4_GL0109250;7_GL0028329	NA	NA	12.2214	NA	13.2024	13.182	13.3411	12.0397	12.4492	NA	NA	NA	NA	13.2309	NA	12.0788	13.1617	13.1502	NA	NA	12.543	NA	NA	12.6675
1-1_GL0061374;1-1_GL0141556;2B-dyr19-06_GL0035065;3-1_GL0061747;3B-dyr36-06_GL0048615;5_GL0165385;6-4_GL0109250;7_GL0028329	NA	NA	NA	NA	NA	NA	NA	NA	11.5693	NA	NA	NA	11.8193	NA	NA	NA	NA	NA	NA	NA	12.3624	NA	NA	NA
11_GL0061743	15.2825	16.5375	14.6806	15.0611	13.0716	11.8383	13.5335	15.812	11.6456	12.6406	15.695	15.2789	14.6086	13.2202	14.8624	14.6592	15.4301	13.4763	15.6002	15.4562	14.6174	13.7895	16.0393	14.4325
11_GL0061773	NA	NA	12.0756	NA	NA	NA	12.8754	11.9024	NA	NA	NA	NA	NA	11.4874	13.9165	NA	NA	NA	NA	NA	13.5067	NA	NA	NA
11_GL0061773;2-7_GL0101884;4-2_GL0037945;4-7_GL0134167;Group2-3A_GL0004558;S-Fe18_GL0004478	15.3704	NA	14.9356	NA	15.49	13.4658	16.0713	NA	NA	14.8483	15.1932	NA	14.9911	15.4925	15.4318	14.8721	15.7095	NA	NA	15.3191	NA	NA	15.0616	NA
11_GL0062566	18.3336	18.7869	18.5961	17.5194	15.7543	16.3219	15.3055	16.8987	16.5963	17.5064	17.4147	18.1751	15.4375	15.7321	15.2529	16.8182	17.5196	15.846	15.847	17.2527	15.1466	15.936	15.7083	17.3223
11_GL0062566;13_GL0088770;1A-dyr2-07_GL0013677;1A-dyr3-06_GL0038646;4-7_GL0125984;5-7_GL0051750;5-7_GL0079241;6-6_GL0048311;6-7_GL0030818;G1-1A_GL0024937;G1-1A_GL0033980;Group2-7A_GL0008319;MC-0-1_GL0017005;MH-6-1_GL0077133;MH-6-4_GL0099134;S-Fe10_GL0029757;S-Fe20_GL0013758;S-Fe20_GL0026514;S-Fe7_GL0268898;S-Fe8_GL0076265	17.2333	16.6807	16.5211	16.7404	16.8979	16.9071	17.0216	16.8757	16.5362	16.0475	17.2055	16.2524	16.8357	16.9616	17.4489	16.5018	16.5526	15.7932	16.5618	16.6556	17.052	18.1548	16.0373	16.1098
11_GL0062567	15.8877	16.2831	15.2692	14.9885	13.2209	13.8464	13.4793	15.6073	14.6895	14.8221	15.5615	15.6895	14.0526	13.2063	14.2321	14.538	15.0482	14.0486	14.8189	15.4685	13.581	13.9332	14.6072	13.9664
11_GL0062568	14.5962	14.1912	13.7825	13.4001	NA	12.6143	10.8481	13.3122	12.9238	13.1684	13.4268	13.8862	11.7252	NA	12.2772	12.935	13.7179	12.0786	12.4064	13.933	11.5065	12.1741	11.8175	12.5436
11_GL0062569	17.1493	17.2501	16.952	16.182	14.596	15.2512	14.066	16.3646	15.3906	15.9497	16.0656	16.6304	14.5512	14.7402	14.1068	15.3225	16.4927	14.6599	14.7794	16.2324	13.7041	14.9641	14.5761	15.5811
11_GL0062569;S-Fe20_GL0122475	16.4033	16.2823	15.5986	15.9838	14.0603	14.5314	14.9419	14.7391	15.352	15.826	15.2969	14.7759	14.2739	14.4455	13.1433	14.2722	15.4732	13.6439	14.4616	15.5033	13.4965	NA	13.8308	14.286
11_GL0062770	NA	NA	17.0517	11.555	15.0245	15.3747	15.9187	15.6042	11.9443	NA	NA	NA	12.69	15.2948	13.4568	17.8357	NA	15.1117	12.2551	14.0233	13.0309	15.0287	17.0239	14.7395
11_GL0062779	NA	NA	13.5678	NA	12.8764	NA	13.7057	13.3049	NA	NA	NA	NA	NA	13.1591	NA	14.2907	NA	13.1693	NA	NA	NA	NA	14.3748	NA
11_GL0062779;11_GL0122981	NA	NA	14.2583	NA	13.9395	13.838	15.0888	15.1508	NA	NA	NA	NA	13.3457	14.1864	13.7449	15.5902	13.7884	13.8839	11.8509	13.4663	14.4669	13.0696	15.9014	NA
11_GL0062779;11_GL0122981;8-3_GL0048164	10.7624	NA	14.8893	13.9529	15.1103	14.9787	15.7507	15.519	NA	NA	NA	NA	14.457	15.2907	14.6052	16.5955	14.4684	14.573	13.7815	14.224	15.2955	15.5025	16.9888	13.5481
1-1_GL0063097	13.7631	14.0264	11.6201	15.7752	NA	NA	NA	NA	NA	NA	NA	11.9519	NA	NA	14.721	16.2274	NA	16.0743	NA	13.869	14.5373	13.7076	NA	NA
1-1_GL0063097;2-1_GL0122637;4-1_GL0013931;7-1_GL0053961;G1-5A_GL0015335	14.0952	15.0367	15.1285	15.647	16.8544	16.8133	15.9637	15.6009	15.9631	15.9727	15.6883	15.738	15.5092	16.8327	12.3393	15.0705	16.7004	16.4387	16.062	16.1423	15.924	15.6181	15.3349	15.5639
11_GL0063254	15.2402	14.9714	15.3304	14.5436	NA	13.6764	NA	14.8103	14.2236	14.3252	14.7602	15.309	13.2318	NA	NA	13.7976	14.5594	13.4418	13.3427	14.9859	12.6682	13.2348	13.4229	13.7772
11_GL0063254;11_GL0095770	16.9235	17.8221	16.4584	16.4191	14.6862	14.7336	14.3324	16.7339	14.8429	15.5505	16.3575	16.4858	15.5305	14.5853	14.7689	15.9183	15.9381	14.776	15.5977	16.3964	14.7209	15.1645	16.3126	16.1128
11_GL0063269	15.2492	14.4575	14.6018	14.0007	13.3755	13.2305	13.1012	14.5345	13.7144	14.2832	14.478	14.9925	12.6859	12.9965	13.3142	13.6275	14.2155	13.1411	13.169	14.6159	12.3821	13.1524	12.7426	13.453
11_GL0063269;14_GL0085272;2_GL0075727;3-5_GL0021064;5-3_GL0000335;7-4_GL0131624;7-5_GL0057901;7_GL0102444;MC-6-1_GL0029908;S-Fe20_GL0054133	16.218	15.7501	15.6208	15.7276	16.6187	NA	16.7678	16.392	15.5954	15.0531	16.4496	16.0655	17.0657	16.6709	17.1529	16.1568	16.0657	15.6091	16.6655	16.2993	16.6115	16.4934	15.8102	15.885
11_GL0063269;5-3_GL0000335	15.8029	NA	15.729	NA	13.1962	12.8013	13.6545	15.7186	13.4178	13.7413	15.4699	15.2646	14.3653	13.2488	14.2873	15.0714	15.1695	13.8372	14.5317	15.4666	13.2589	13.4039	14.4674	15.2628
1-1_GL0063435;3-3_GL0108964	13.1384	11.3141	11.9341	12.5207	13.9697	14.1291	13.9319	15.111	12.4951	13.2105	11.921	13.3097	11.962	13.7545	13.9712	13.2143	14.6833	14.937	13.1355	12.9774	12.8736	11.2608	13.8467	14.398
1-1_GL0063435;3-3_GL0108964;7-1_GL0023155	14.7448	14.1729	14.5302	15.2724	17.4801	17.198	16.6978	16.2619	16.4297	16.081	15.8526	16.5176	16.3337	17.6469	16.1041	16.2412	17.3451	15.6633	16.8211	16.1309	14.9373	14.5171	15.2096	16.0824
11_GL0063592	NA	NA	NA	NA	12.3937	12.8263	12.0755	13.1175	NA	NA	NA	NA	13.0806	12.7303	NA	NA	NA	14.3973	10.0134	12.407	NA	NA	NA	NA
1-1_GL0063993	14.1958	13.2055	12.4704	14.0437	13.1831	12.7403	13.2749	14.724	13.4319	12.2443	12.735	11.8125	13.6538	13.082	13.813	NA	10.2277	15.06	14.0327	13.0215	11.9782	NA	13.2855	14.1728
1-1_GL0063993;3-3_GL0011641;4-3_GL0091638;4-8_GL0074077;7-1_GL0074936;7-4_GL0098846;G1-5A_GL0012887;G1-8A_GL0052900;Group2-5A_GL0107794;MC-6-1_GL0089287;S-Fe17_GL0013609;S-Fe7_GL0210999	16.1644	15.2494	15.7077	15.5147	17.3943	17.0441	16.836	16.3524	17.2383	15.994	16.6022	16.8371	17.4126	17.4549	17.0757	17.1284	16.9631	16.971	16.9754	17.2088	16.9377	16.6786	16.4187	15.9588
1-1_GL0063995	11.7356	10.7878	11.5441	11.8343	12.5705	12.2756	12.7524	12.9966	11.6259	10.9863	10.6129	12.0626	12.3149	12.5503	13.019	12.2663	12.634	12.928	11.9522	11.7347	11.3599	13.5149	12.4778	12.2632
1-1_GL0063995;1-2_GL0070352	13.1524	12.0217	12.4891	12.779	14.3194	14.0454	15.2301	14.4742	14.4618	12.6054	13.3917	13.3379	13.6332	14.4196	14.9219	13.3783	14.4164	14.2229	13.8831	13.6656	13.9956	13.9267	13.5208	13.6366
1-1_GL0063995;1-2_GL0070352;2-1_GL0004685;2-1_GL0050430;2-1_GL0121740;2-2_GL0073397;2-3_GL0002271;4-1_GL0074517;4-8_GL0123191;5-1_GL0071199;Group2-8A_GL0063593	15.8792	14.3242	14.8085	14.4037	16.6259	16.0063	16.2587	15.3132	16.2224	14.6936	15.605	15.8231	16.2451	16.484	16.5801	15.4778	16.2271	15.7781	16.8707	16.4816	16.5395	15.5181	15.3867	15.6645
1-1_GL0063995;1-2_GL0070352;2-1_GL0004685;2-1_GL0050430;2-1_GL0121740;2-2_GL0073397;2-3_GL0002271;5-1_GL0071199;Group2-8A_GL0063593	16.1005	NA	NA	NA	NA	NA	NA	NA	NA	14.1747	NA	NA	NA	NA	16.1374	NA	NA	NA	NA	NA	NA	NA	NA	NA
1-1_GL0063995;1-2_GL0098677;4-1_GL0074517	NA	NA	NA	NA	NA	NA	NA	11.6454	NA	NA	NA	12.6308	13.1153	NA	12.0395	NA	11.8767	12.1024	NA	NA	11.1591	NA	NA	NA
1-1_GL0063995;2-1_GL0121740;2-2_GL0073397;2-3_GL0002271;4-8_GL0123191;5-1_GL0071199	13.337	11.3938	NA	11.4979	13.1531	12.7052	13.4252	12.8461	12.3513	NA	12.6643	13.8723	13.3278	12.9221	13.3234	12.1347	13.1092	12.9428	13.9952	13.6784	12.418	12.6713	12.1341	11.842
1-1_GL0063995;2-2_GL0073397	10.9265	11.4845	10.4123	12.6875	14.1512	13.476	12.7809	11.5782	12.8354	NA	11.1894	12.0906	13.2473	14.1544	NA	12.2123	12.4639	11.2975	14.0533	12.5172	12.8865	12.3605	11.4332	11.3338
1-1_GL0063995;2-2_GL0073397;5-1_GL0071199	12.6604	11.5693	12.368	12.6792	14.2581	13.8765	13.2676	12.676	13.6489	NA	13.5987	13.9523	13.7032	14.2451	13.821	13.1941	12.6521	13.1771	14.9519	13.611	13.5451	13.5434	12.9584	12.3094
1-1_GL0063995;5-1_GL0071199;Group2-8A_GL0063593	13.387	12.4916	12.8326	13.0626	14.6886	14.5454	14.5102	13.9516	13.2084	13.4284	14.035	14.1601	NA	14.8027	13.3629	13.5056	14.7635	13.8903	15.0488	14.2377	14.0718	13.2392	12.8535	13.7973
1-1_GL0064280	NA	NA	10.9012	NA	12.3828	NA	NA	NA	12.3483	11.2505	12.3139	10.668	12.1943	12.0854	11.1191	NA	11.6958	12.7822	11.2906	NA	NA	NA	11.934	10.6755
1-1_GL0064280;38_GL0032027	13.8027	NA	14.9084	NA	16.1378	NA	NA	NA	16.3143	15.2584	15.8253	14.5037	15.0695	16.1604	14.329	NA	15.658	16.771	14.3366	12.216	NA	NA	14.9559	14.0497
1-1_GL0064345	12.2831	10.9437	11.8329	NA	13.86	13.1542	14.3108	14.2368	14.0665	13.9516	13.1377	13.1622	11.8483	14.2196	13.2923	13.4393	13.8904	14.4126	13.2798	12.595	12.8237	NA	NA	12.3786
1-1_GL0064345;3-1_GL0094038;32_GL0061905;5-6_GL0001048;MH-6-3_GL0063230	15.6329	14.796	14.1373	16.0634	16.0417	16.9369	17.6855	16.0532	16.3938	16.5351	14.2915	14.997	16.1639	16.1543	NA	15.5014	15.879	15.0147	15.5824	15.9682	16.6305	17.2735	15.6404	16.3357
1-1_GL0064345;32_GL0061905;MH-6-3_GL0063230	10.857	NA	10.0193	NA	12.7054	12.4412	13.7443	13.2734	12.3987	12.0146	11.4255	12.3626	12.7808	12.6863	12.2816	12.0267	12.5418	12.7799	12.0443	11.9242	12.7937	11.5781	11.8803	12.0413
1-1_GL0064871	NA	NA	10.7642	NA	12.9319	NA	NA	NA	12.5863	12.2659	12.2721	11.0971	12.2985	12.9737	11.3347	NA	12.2726	12.8199	NA	NA	NA	NA	12.3635	NA
1-1_GL0064871;MH-6-3_GL0024150	13.0176	NA	12.9587	11.9773	15.1884	14.1952	14.7017	14.8173	14.8867	14.5008	13.5979	14.0386	14.6403	15.0109	14.4859	13.6068	14.395	14.6286	13.7781	13.5766	14.0897	12.6272	13.4249	13.4655
1-1_GL0065399	13.3911	12.9126	10.2155	13.978	NA	NA	NA	NA	NA	NA	NA	11.062	NA	NA	12.0144	14.2791	NA	14.4325	NA	12.5371	12.9637	12.5566	NA	NA
1-1_GL0065399;1A-dyr4-07_GL0047701	10.2412	10.618	NA	10.7695	11.3978	11.5967	12.5844	12.7633	11.6279	NA	11.308	12.16	11.1029	11.693	11.6184	11.7121	12.3571	11.3186	12.0908	10.183	11.6969	11.6187	11.5407	10.9306
1-1_GL0065399;2-1_GL0032713;22_GL0066268;4-1_GL0040084;6-6_GL0013485;7-1_GL0048475;G1-5A_GL0201828	14.785	13.7037	15.0396	14.3203	15.7169	15.646	15.3515	15.0958	16.0068	15.0769	15.8046	15.676	15.1551	15.9147	15.5459	15.0656	15.7871	16.0965	16.4413	16.1506	14.4801	15.3695	15.2238	15.5008
1-1_GL0065399;22_GL0066268;G1-5A_GL0201828	13.1532	13.1285	NA	13.2916	NA	NA	NA	NA	12.7068	NA	NA	12.7821	14.0781	NA	12.4654	13.1473	10.5263	13.8283	13.1813	NA	13.7569	13.032	12.3334	NA
11_GL0065633;17_GL0127899;5-4_GL0107661;MH-6-3_GL0027943;MH-6-5_GL0115821;S-Fe12_GL0083056	14.2426	13.9719	NA	15.2066	14.3684	14.3063	14.5268	14.1316	15.8636	NA	13.9854	14.4	13.7167	14.4924	12.4557	13.3546	14.1581	14.3739	15.0888	13.5171	14.6276	15.582	14.0988	14.6845
11_GL0065633;17_GL0127899;5-4_GL0107661;MH-6-5_GL0115821;S-Fe12_GL0083056	15.2806	13.9956	14.0066	16.1738	15.9221	15.4306	15.8313	15.4272	16.1745	14.109	15.3235	14.8514	15.1139	15.9682	13.0821	13.486	15.644	15.4327	16.3357	14.4003	15.3466	16.5546	15.4361	15.6814
11_GL0065633;5-4_GL0107661	NA	NA	13.1128	15.8289	14.5699	15.5338	14.9336	15.0898	13.9569	12.501	12.5034	NA	13.2801	14.687	14.1355	NA	14.6707	12.3468	13.2827	NA	13.7017	16.7399	12.3273	14.0572
11_GL0065633;5-4_GL0107661;MH-6-3_GL0027943;MH-6-5_GL0115821	NA	NA	NA	NA	NA	NA	NA	13.6702	NA	NA	NA	NA	NA	NA	NA	NA	NA	NA	NA	NA	NA	NA	NA	NA
11_GL0065633;5-4_GL0107661;MH-6-5_GL0115821	12.8085	12.3272	12.5568	15.4393	14.3277	16.5808	15.1084	14.8325	14.102	NA	13.3525	NA	13.9877	14.5961	15.0171	11.2663	13.9558	13.4738	13.9585	12.4063	13.5435	16.8181	11.7089	12.0267
11_GL0065712	NA	NA	NA	NA	NA	NA	NA	NA	NA	NA	NA	NA	12.4966	12.7698	NA	NA	13.1998	NA	NA	NA	13.2367	NA	NA	NA
11_GL0065712;11_GL0140676	NA	NA	NA	NA	NA	12.7579	13.8065	NA	NA	NA	NA	NA	NA	NA	NA	NA	NA	NA	12.8352	NA	NA	12.8466	NA	NA
11_GL0065713	NA	NA	NA	NA	13.5426	NA	NA	NA	NA	NA	NA	NA	13.9168	13.3331	15.3456	12.8592	14.592	NA	NA	NA	15.3071	13.697	13.034	12.3562
11_GL0065713;11_GL0158489;1A-dyr4-07_GL0023556;2-2_GL0089776;20_GL0048707;3-5_GL0119887;4-7_GL0031370;5-1_GL0077814;Group2-3A_GL0100863;S-Fe20_GL0144264;S-Fe2_GL0032219	11.9807	12.0492	10.9852	12.2592	13.1269	13.2218	13.9183	13.8784	12.9733	11.0673	11.8998	NA	NA	13.0524	13.5425	13.3888	12.0296	11.9617	13.4583	11.4519	11.4863	14.9461	14.4607	13.757
11_GL0065713;11_GL0158489;1A-dyr4-07_GL0023556;3-5_GL0119887;4-1_GL0033101;7-5_GL0099918;8-2_GL0142115;Group2-3A_GL0100863	14.4656	14.9348	14.9306	15.1065	16.0638	16.3594	16.1392	15.2744	16.2391	13.9289	14.6974	NA	NA	16.1792	16.8274	15.6081	15.1414	15.3413	16.2106	14.8181	NA	17.3493	16.9692	15.0995
11_GL0065713;11_GL0158489;3-5_GL0119887;4-7_GL0031370;6-2_GL0059797;S-Fe20_GL0144264;S-Fe2_GL0032219	NA	NA	13.0491	NA	12.751	NA	13.9594	13.5004	NA	NA	NA	11.5938	13.4991	12.9722	13.0532	13.8385	13.2301	NA	13.9397	NA	12.8821	12.5949	NA	NA
11_GL0065713;1A-dyr4-07_GL0023556;2-1_GL0009313;2-1_GL0052084;2-1_GL0052682;2-5_GL0003928;3-5_GL0119887;4-7_GL0031370;6-5_GL0030705;Group2-3A_GL0080538;Group2-3A_GL0100863;MC-6-2_GL0015820;S-Fe20_GL0144264;S-Fe2_GL0032219	15.5732	12.2857	13.6944	13.0071	16.08	15.8973	16.6875	15.8618	13.8096	14.4461	14.732	15.2332	16.0178	16.4248	16.3854	15.0858	15.8196	15.2206	15.9186	15.5211	15.4553	15.5943	15.3285	15.3487
11_GL0065713;1A-dyr4-07_GL0023556;3-5_GL0119887;Group2-3A_GL0100863	14.085	13.5839	13.902	14.1247	15.5864	15.9064	16.04	15.0978	13.8929	14.0223	14.3034	12.5924	15.021	15.5355	15.3776	15.3111	14.8355	13.9419	15.4237	13.6738	16.1987	17.1831	15.626	15.1604
11_GL0065713;1A-dyr5-06_GL0045551;2-1_GL0009313;2-1_GL0052084;2-2_GL0145679;2-5_GL0003928;3-5_GL0119887;4-1_GL0033101;4-7_GL0031370;5-1_GL0077814;6-4_GL0013979;6-4_GL0029542;7-5_GL0099918;8-2_GL0142115;G1-6A_GL0060704;Group2-3A_GL0080538;MC-6-2_GL0015820;MC-6-2_GL0106506;S-Fe20_GL0144264;S-Fe2_GL0016289;S-Fe2_GL0032219;S-Fe9_GL0205600	17.9692	16.7467	17.0644	17.1694	18.702	17.6999	19.5641	17.4774	17.7556	16.241	17.8593	17.4628	18.8141	18.8976	19.5501	17.5561	17.5273	17.8179	19.2594	18.2268	19.0373	18.5048	17.4535	16.9348
11_GL0065713;3-5_GL0119887	NA	NA	11.3959	NA	NA	NA	NA	11.8087	NA	NA	NA	NA	NA	12.8945	12.526	11.7946	NA	NA	NA	NA	12.1089	NA	12.4758	NA
11_GL0065713;3-5_GL0119887;4-7_GL0031370;5-1_GL0077814;Group2-3A_GL0080538;S-Fe20_GL0144264;S-Fe2_GL0016289;S-Fe2_GL0032219	NA	NA	NA	NA	13.9838	15.1341	14.1187	13.4767	NA	10.9668	NA	NA	14.1535	14.043	14.0363	11.2733	14.0116	12.8646	14.2292	NA	12.8228	14.1526	11.1814	11.3018
11_GL0065713;3-5_GL0119887;4-7_GL0031370;S-Fe20_GL0144264	NA	NA	NA	NA	NA	11.6096	NA	NA	NA	NA	NA	NA	11.2835	9.93241	NA	NA	NA	NA	NA	NA	NA	NA	NA	NA
11_GL0065713;3-5_GL0119887;4-7_GL0031370;S-Fe20_GL0144264;S-Fe2_GL0032219	15.3431	14.0795	15.5136	15.2219	17.1917	15.8766	17.5983	15.9046	13.9408	12.2824	14.6383	13.7791	16.2144	17.4185	17.3586	16.935	15.6113	14.7971	16.0625	15.1163	17.0876	16.4747	16.1686	14.8926
11_GL0065713;3-5_GL0119887;S-Fe2_GL0032219	15.742	14.402	15.3567	15.6583	17.1479	16.3631	17.6483	16.5571	15.2634	NA	16.1177	15.3045	17.2515	17.2384	17.3989	16.7742	16.1741	16.4683	16.6011	16.2086	16.7891	16.2818	16.6619	14.944
11_GL0065713;4-7_GL0031370;S-Fe20_GL0144264	NA	9.93263	10.542	NA	12.6909	NA	10.6354	12.63	11.4944	NA	NA	NA	12.3321	12.5365	12.2599	11.2856	13.8144	NA	NA	NA	13.9178	NA	10.0996	NA
11_GL0066347;11_GL0139318	13.9197	NA	14.7915	NA	14.8378	15.0047	15.6024	15.9479	12.2061	NA	NA	14.652	14.469	15.1165	14.8397	16.3379	14.7182	14.8717	13.9886	15.583	15.2512	14.6835	15.6653	13.8421
11_GL0066347;11_GL0139318;1A-dyr4-07_GL0083013;1A-dyr4-07_GL0090469;2-1_GL0033349;2-1_GL0112186;23_GL0012977;4-1_GL0013487;4-1_GL0057479;6-3_GL0098453;8_GL0053219;Group2-2A_GL0082298	15.2973	14.4858	15.1351	15.1083	16.7221	17.4939	16.2347	17.0779	16.3577	15.6608	16.295	15.2074	16.6992	16.793	16.6079	16.2763	15.9714	15.8792	17.0636	15.6871	16.537	16.9968	16.3641	15.0525
11_GL0066347;11_GL0139318;1A-dyr4-07_GL0090469;23_GL0012977;4-2_GL0077478;6-2_GL0055252;6-3_GL0098453;G1-5A_GL0067575;Group2-2A_GL0082298;Group2-3A_GL0036528;Group2-4A_GL0041798;Group2-5A_GL0020455;S-Fe20_GL0089803;S-Fe20_GL0180068	15.1143	14.7632	15.2568	14.9981	16.3226	16.515	16.0625	16.2929	15.2405	14.6184	15.6135	14.0555	15.9187	16.104	16.0245	16.0665	15.1902	15.4765	15.9721	15.0567	16.1049	15.9835	15.5768	14.97
11_GL0066347;11_GL0139318;1A-dyr4-07_GL0090469;23_GL0012977;8_GL0053219;Group2-2A_GL0082298;S-Fe20_GL0089803;S-Fe20_GL0180068	12.4435	NA	NA	NA	NA	NA	12.7794	NA	NA	NA	12.427	NA	NA	NA	NA	NA	NA	NA	12.7891	NA	NA	13.5259	NA	NA
11_GL0066347;1A-dyr4-07_GL0083013;1A-dyr4-07_GL0090469;2-1_GL0112186;23_GL0012977;4-1_GL0013487;4-8_GL0028110;6-3_GL0098453;8_GL0053219;Group2-2A_GL0082298;Group2-3A_GL0036528;S-Fe20_GL0089803;S-Fe20_GL0180068	15.2385	16.2495	15.816	16.5543	16.956	18.0347	16.8411	17.6909	16.2806	16.093	16.4404	15.3972	17.193	17.177	17.0684	16.8622	16.3937	16.591	16.6251	15.9107	16.9684	17.8107	16.1651	16.7719
11_GL0066347;1A-dyr4-07_GL0090469;23_GL0012977;6-3_GL0098453;8_GL0053219;Group2-2A_GL0082298	NA	NA	NA	NA	NA	12.8373	NA	12.6381	NA	NA	NA	NA	12.1975	NA	NA	NA	NA	NA	NA	NA	12.6092	NA	12.1087	NA
11_GL0066347;1A-dyr4-07_GL0090469;6-3_GL0098453;8_GL0053219	NA	11.8353	11.1544	12.4983	13.6331	13.8897	NA	14.2418	12.6469	NA	13.0722	NA	13.5476	14.0761	NA	12.8471	12.3461	NA	13.7085	NA	13.9835	14.457	12.394	12.7089
11_GL0066347;1A-dyr4-07_GL0090469;6-3_GL0098453;8_GL0053219;Group2-2A_GL0082298	11.7283	12.1306	11.9127	12.4341	12.9225	14.4346	10.9467	13.5974	11.7605	11.9378	13.1613	10.9523	10.9133	12.6423	13.0855	12.9522	12.3218	12.064	13.4631	11.9894	12.964	14.7887	12.0292	12.374
11_GL0066347;23_GL0012977;6-3_GL0098453;8_GL0053219;Group2-2A_GL0082298	13.811	NA	11.7173	NA	NA	15.1187	12.7326	13.8473	12.1074	NA	NA	NA	13.6205	NA	NA	NA	NA	11.6485	NA	12.8472	14.2069	NA	NA	NA
11_GL0066347;6-3_GL0098453;Group2-2A_GL0082298;S-Fe20_GL0180068	NA	NA	NA	NA	NA	11.7198	NA	12.1739	NA	NA	NA	NA	11.2998	12.0275	10.5955	NA	10.6198	NA	NA	NA	11.0168	NA	NA	NA
11_GL0066546	15.1816	14.695	14.733	13.7023	NA	13.0402	12.0397	13.8737	13.6367	13.9732	14.012	14.7471	12.6882	NA	NA	13.2813	14.1232	12.6377	12.9891	14.1362	12.2152	12.9032	13.0658	13.2027
1-1_GL0066548	NA	NA	NA	11.9714	NA	NA	NA	15.5026	NA	NA	NA	NA	12.8079	12.548	12.6166	NA	14.4791	NA	NA	NA	12.2279	NA	NA	NA
1-1_GL0066548;1-2_GL0129635;2-2_GL0030376;3-2_GL0004470;5-6_GL0078041;7-6_GL0110443;G1-5A_GL0169212;Group2-3A_GL0175727;S-Fe6_GL0031332;S-Fe9_GL0026444	14.7697	14.7012	14.5614	15.8102	16.7438	15.7824	16.4389	16.8252	16.7568	17.0783	15.8691	17.2337	15.6343	16.8249	17.7673	16.6096	17.0512	18.9648	16.172	17.5599	16.8328	16.012	17.0364	15.803
1-1_GL0066548;2-2_GL0030376;3-2_GL0004470;Group2-3A_GL0175727;S-Fe6_GL0031332;S-Fe9_GL0026444	NA	NA	NA	NA	NA	NA	NA	12.6369	12.2733	NA	NA	12.8123	NA	NA	NA	NA	NA	NA	NA	NA	12.2243	NA	12.7854	NA
1-1_GL0066548;5-8_GL0137451;6-3_GL0047309	15.163	15.9575	14.7173	14.0363	16.1785	15.5895	15.382	16.6041	15.4833	13.2012	14.4278	17.6175	15.7954	16.1452	14.96	15.075	15.2129	14.3038	16.4128	17.7429	16.3609	16.9624	15.9019	14.6355
1-1_GL0066932	NA	NA	NA	NA	NA	NA	NA	NA	9.55438	NA	NA	NA	12.2515	NA	NA	NA	NA	NA	12.9192	NA	NA	NA	NA	NA
1-1_GL0066932;1-1_GL0083048;1-1_GL0095104;1-4_GL0080357;17_GL0105836;20_GL0029051;20_GL0163715;2_GL0125294;35_GL0136148;4-3_GL0039646;5-5_GL0065367;5-8_GL0139456;MH-6-2_GL0012694;MH-6-2_GL0028666;MH-6-3_GL0042795;MH-6-5_GL0099912;MH-6-5_GL0136824;MH-6-5_GL0183530;S-Fe2_GL0026209	13.5847	13.9154	16.4754	15.1078	15.2442	14.656	13.9479	14.8853	14.6945	13.0479	14.3004	13.4966	15.6418	15.0903	14.8631	14.6586	14.8164	15.1511	13.9326	14.0616	14.24	14.4258	13.9581	14.4816
1-1_GL0066932;1-1_GL0083048;1-4_GL0080357;1-6_GL0079693;1-8_GL0092769;10_GL0009545;14_GL0105035;17_GL0160550;1A-dyr2-07_GL0038040;1A-dyr4-07_GL0018595;1A-dyr4-07_GL0057123;20_GL0027333;20_GL0052321;20_GL0163715;23_GL0130307;26_GL0111020;26_GL0127226;29_GL0067888;2_GL0075359;2_GL0144406;35_GL0136148;4-1_GL0015438;4-1_GL0069044;4-2_GL0053150;4-2_GL0105421;4-3_GL0039646;47_GL0039979;5-5_GL0065367;5-…	20.0879	20.6386	20.5461	20.7886	21.0232	20.8524	20.93	21.0185	20.8071	20.0426	20.8377	20.228	21.0153	20.9633	21.3444	20.5395	20.6378	20.7987	21.0023	20.5713	21.047	20.9518	20.2773	20.2675
1-1_GL0066932;1-1_GL0083048;1-4_GL0080357;1-6_GL0079693;1-8_GL0092769;10_GL0009545;14_GL0105035;17_GL0160550;1A-dyr2-07_GL0038040;1A-dyr4-07_GL0018595;1A-dyr4-07_GL0057123;20_GL0027333;20_GL0052321;20_GL0163715;23_GL0130307;26_GL0111020;26_GL0127226;29_GL0067888;2_GL0075359;2_GL0144406;35_GL0136148;4-1_GL0015438;4-1_GL0069044;4-2_GL0053150;4-2_GL0105421;4-3_GL0039646;47_GL0039979;5-5_GL0065367;5-…	NA	NA	NA	NA	NA	NA	NA	13.8709	NA	NA	NA	12.7774	12.824	NA	NA	NA	NA	NA	NA	NA	13.4885	NA	NA	NA
1-1_GL0066932;1-1_GL0083048;17_GL0105836;20_GL0029051;20_GL0163715;G1-3A_GL0041449;G1-3A_GL0131986;MH-6-5_GL0099912;S-Fe2_GL0026209;S-Fe2_GL0171473;S-Fe2_GL0195698	17.3029	18.3079	17.9503	19.1797	19.5361	19.3059	18.8087	18.8526	18.9712	18.1296	18.7705	17.025	20.2654	19.5171	19.4047	18.2756	19.2706	18.3017	19.4063	17.0082	18.5733	18.4023	17.2847	17.9087
1-1_GL0066932;1-1_GL0083048;1-7_GL0127377;17_GL0105836;17_GL0160550;1A-dyr4-07_GL0057123;20_GL0029051;20_GL0163715;23_GL0130307;29_GL0067888;4-2_GL0053150;4-3_GL0039646;6-5_GL0134330;7-8_GL0038775;MH-6-1_GL0000008;MH-6-3_GL0042795;MH-6-4_GL0095022;S-Fe12_GL0194038;S-Fe20_GL0041555	12.8466	13.8393	13.573	13.9725	13.957	13.9972	13.9266	13.5057	13.6808	12.7761	13.651	12.9859	14.6764	14.1293	13.9195	13.5463	13.6739	13.6371	13.8212	12.611	13.2471	12.9397	13.4503	13.6324
1-1_GL0066932;1-1_GL0083048;1-8_GL0092769;10_GL0009545;1A-dyr4-07_GL0057123;20_GL0163715;23_GL0130307;26_GL0111020;29_GL0067888;35_GL0136148;4-3_GL0039646;5-5_GL0065367;54_GL0144097;6-3_GL0103114;6-8_GL0085366;7-8_GL0038775;G1-5A_GL0036391;Group2-4A_GL0009226;MC-0-1_GL0011862;MH-6-5_GL0025727;S-Fe2_GL0195698;S-Fe3_GL0215405	NA	13.5681	NA	NA	NA	NA	NA	12.7841	NA	NA	NA	NA	12.8015	NA	NA	NA	NA	NA	NA	NA	11.4076	NA	11.0026	NA
1-1_GL0066932;1-1_GL0083048;20_GL0163715;23_GL0130307;29_GL0067888;35_GL0136148;4-2_GL0053150;4-3_GL0039646;5-7_GL0133472;6-5_GL0134330;7-8_GL0038775;MH-6-4_GL0095022;S-Fe20_GL0101053;S-Fe3_GL0215405;S-Fe7_GL0084033	16.444	16.8263	16.6069	16.7706	16.8849	18.0619	17.0924	17.5338	16.5948	15.8648	16.4194	16.2464	18.3239	17.0214	17.1022	15.8504	16.6735	16.7478	17.5584	15.3438	16.8019	16.3047	16.749	16.8918
1-1_GL0066932;1-1_GL0095104;1-1_GL0128445;1-3_GL0102532;1-4_GL0080357;1-7_GL0127377;14_GL0118271;17_GL0105836;17_GL0160550;1A-dyr4-07_GL0057123;20_GL0029051;20_GL0163715;22_GL0076169;23_GL0079503;29_GL0067888;35_GL0136148;4-1_GL0069044;4-2_GL0053150;4-3_GL0039646;5-5_GL0075629;5-8_GL0061093;5-8_GL0139456;6-3_GL0103114;6-5_GL0134330;7-3_GL0066037;7-4_GL0099193;7-5_GL0007166;7-5_GL0115577;G1-5A_GL0…	18.7734	18.5974	19.4186	19.2492	19.6389	19.2311	19.7102	19.0972	19.5469	18.4051	19.2781	18.1286	19.6541	19.692	19.769	19.2691	19.2461	19.2514	19.5221	18.3603	19.7393	19.6356	18.5208	18.9848
1-1_GL0066932;17_GL0160550;20_GL0163715;23_GL0130307	18.2276	17.6871	18.6108	19.388	19.6394	19.9545	20.2038	18.4374	17.8337	17.2907	19.2856	17.3443	19.3612	NA	19.0921	18.4289	18.0547	18.6476	19.4879	18.2955	19.4867	18.9382	17.7436	18.3245
1-1_GL0066932;17_GL0160550;20_GL0163715;5-7_GL0133472;7-8_GL0038775;G1-3A_GL0041147;G1-3A_GL0041449;MC-0-1_GL0098029;MH-6-3_GL0042795;S-Fe2_GL0171473;S-Fe2_GL0195698	NA	NA	NA	NA	NA	11.1439	NA	NA	NA	NA	NA	NA	11.4829	10.742	11.5703	NA	NA	NA	NA	NA	10.2355	NA	NA	NA
1-1_GL0066932;20_GL0163715	12.4853	12.7739	NA	13.931	13.1434	13.4085	13.625	12.9374	NA	NA	13.5086	12.154	13.1072	NA	13.7998	12.4406	NA	13.0296	13.2924	NA	13.7726	12.631	NA	NA
1-1_GL0066932;20_GL0163715;35_GL0136148;4-2_GL0053150;5-5_GL0065367;7-8_GL0038775;S-Fe2_GL0195698;S-Fe3_GL0215405	17.5459	17.8758	17.6694	18.3273	18.9257	18.2821	18.6671	17.784	18.2602	16.7991	18.1348	18.1681	19.6166	NA	18.8762	18.2053	16.4422	18.1664	18.9633	17.6861	18.6626	18.5508	16.9723	17.2484
1-1_GL0067006	12.5051	14.9684	13.6397	15.1109	NA	NA	NA	NA	13.0978	NA	13.6683	NA	NA	NA	NA	NA	12.6334	NA	13.2738	12.818	NA	13.7327	12.2092	NA
1-1_GL0067006;1-1_GL0120486;40_GL0017458;7-1_GL0071761;G1-2A_GL0001893;MC-0-3_GL0002686	17.7547	18.7493	18.0189	18.5571	17.5699	16.9599	15.2711	17.2098	16.858	15.0996	18.9957	15.8782	17.7996	17.6307	17.8413	16.0102	17.1876	15.8417	18.6301	16.7487	17.4588	17.7029	16.7164	14.4635
1-1_GL0067006;1-1_GL0120486;7-1_GL0071761	14.3859	13.7397	14.3767	13.4601	14.0415	12.8514	NA	12.8604	13.4167	NA	14.392	NA	13.8988	13.7458	13.7568	NA	NA	NA	14.1727	12.6687	11.8548	13.4018	12.9591	NA
1-1_GL0067006;40_GL0017458;7-1_GL0071761;G1-2A_GL0001893;MC-0-3_GL0002686	17.4177	18.384	17.9917	17.9861	16.9816	16.4832	14.2334	16.2597	16.2263	14.4221	18.1535	15.4212	17.5594	17.1442	17.7177	15.6475	16.5755	15.5509	17.8194	16.4202	16.9802	17.3151	16.4307	14.0513
1-1_GL0067006;G1-2A_GL0001893;MC-0-3_GL0002686	14.0369	14.8997	14.7623	14.0779	13.358	13.1678	NA	12.6465	13.2223	NA	14.4051	NA	13.8311	13.419	14.0731	13.0696	13.247	12.2956	13.9381	12.8649	13.5426	14.5791	12.9732	NA
1-1_GL0067993	13.4623	13.4331	13.5201	13.0118	12.4161	NA	NA	NA	13.265	NA	12.7738	NA	NA	12.8867	12.9904	NA	NA	NA	12.3259	NA	NA	14.2528	NA	NA
1-1_GL0068022	NA	NA	11.6272	NA	NA	11.6758	NA	NA	NA	NA	NA	NA	NA	NA	NA	NA	10.4056	9.17562	11.534	NA	NA	NA	NA	NA
11_GL0068447	NA	13.2258	13.4322	14.0864	NA	12.7322	NA	NA	NA	NA	NA	NA	NA	NA	13.4952	NA	12.9754	NA	NA	NA	12.9664	14.5457	NA	NA
11_GL0068447;17_GL0030922;17_GL0081250;2_GL0033129;4-2_GL0102618;6-3_GL0040209;7-8_GL0055322;G1-7A_GL0073967;Group2-4A_GL0033622;S-Fe20_GL0027213	15.6988	16.0254	16.3183	16.0318	16.6165	16.8167	16.5206	16.8563	16.6358	15.2042	15.8248	15.9282	15.8036	16.9204	17.5096	16.823	16.56	16.1586	16.9782	16.2985	16.4383	16.7037	16.5574	15.9709
11_GL0068447;1A-dyr2-07_GL0028344;20_GL0014296;MC-0-1_GL0050997;MC-6-2_GL0094206;MC-6-3_GL0028764;MH-0-3_GL0071339;S-Fe10_GL0104485;S-Fe10_GL0173635	15.7006	17.0408	17.2855	16.6827	15.4455	15.1044	12.9312	14.7576	15.2404	12.804	15.8964	14.1927	16.8445	15.6227	16.3177	14.8242	14.2823	13.4113	16.0693	15.4885	16.0493	15.9572	13.9612	NA
1-1_GL0068882	13.7099	12.5127	13.279	12.1823	15.1945	13.88	14.8326	13.8218	14.2232	12.9103	14.4809	14.0492	15.8031	15.1994	15.175	13.8009	14.477	14.1285	15.0551	13.9598	14.9887	13.7592	13.5078	13.8758
1-1_GL0068882;23_GL0056999;32_GL0103930;5_GL0125181;Group2-7A_GL0015842	12.0023	11.5763	11.5281	11.75	12.3705	13.572	12.6407	12.544	11.4531	11.0583	12.6311	11.6447	12.9754	12.3529	12.9395	12.271	11.8457	12.1354	12.7681	12.3561	12.6799	12.7261	10.7085	11.7956
1-1_GL0068882;23_GL0056999;4-2_GL0094209;5_GL0125181;Group2-7A_GL0015842;S-Fe20_GL0056614;S-Fe20_GL0177615	NA	8.78875	NA	NA	10.3944	10.8277	11.4575	10.4959	10.5893	NA	9.54547	NA	11.6929	10.1672	9.27606	NA	10.745	NA	10.7192	9.73366	11.4083	9.96589	NA	9.95575
1-1_GL0068882;23_GL0056999;5_GL0125181;S-Fe20_GL0056614;S-Fe20_GL0177615	13.983	13.4359	12.3581	NA	15.0841	15.8073	14.8455	15.0918	14.9123	13.3752	14.1095	13.7588	15.9392	14.946	15.78	14.0899	14.8294	14.9012	15.4965	14.4905	15.6156	16.2168	13.4838	13.9733
11_GL0068944;2A-dyr14-07_GL0021171	NA	NA	NA	NA	14.2134	NA	NA	NA	NA	NA	NA	NA	14.6676	14.4618	15.5917	12.7582	16.301	NA	NA	NA	16.4822	NA	NA	NA
1-1_GL0069012;10_GL0062623;1A-dyr2-07_GL0071420;MH-6-5_GL0072282	NA	10.2481	NA	NA	11.3918	12.4744	12.422	11.4015	10.862	NA	11.2112	11.3871	11.7067	11.411	11.0335	NA	10.7216	11.2363	12.3911	11.8375	11.8371	12.8345	NA	NA
1-1_GL0069012;1-1_GL0123826;10_GL0098958;14_GL0028185;17_GL0000326;1A-dyr2-07_GL0069472;20_GL0129545;5-4_GL0047819;6-3_GL0105993;7-7_GL0023089;G1-5A_GL0100090;Group2-1A_GL0054538;Group2-3A_GL0100925;Group2-6A_GL0061250;S-Fe10_GL0047359;S-Fe15_GL0009376;S-Fe20_GL0030613;S-Fe9_GL0131303	11.6788	11.7662	11.7699	12.2226	NA	14.6167	12.442	13.324	12.5171	12.24	11.6829	10.382	12.7012	12.4852	NA	12.8173	12.7256	11.9017	12.3311	11.7525	11.9063	13.41	11.8648	13.3171
1-1_GL0069012;1-1_GL0123826;1-2_GL0110214;10_GL0016532;10_GL0062623;10_GL0098958;14_GL0028185;17_GL0000326;1A-dyr2-07_GL0069472;1A-dyr2-07_GL0071420;2-1_GL0111144;2-2_GL0053682;2-3_GL0014792;2-4_GL0098628;20_GL0129545;26_GL0096319;3-5_GL0028454;3-5_GL0048553;3-6_GL0049852;5-4_GL0047819;6-2_GL0006408;6-3_GL0105993;7-5_GL0063139;7-7_GL0023089;7-7_GL0107700;8-4_GL0075684;G1-1A_GL0058007;G1-5A_GL0100…	11.5298	12.1645	12.3528	NA	13.9472	15.5002	12.5939	15.0096	13.611	12.3028	NA	NA	15.2067	14.1964	14.5536	12.4301	14.4265	13.2081	14.1903	NA	13.7908	13.4381	13.245	12.5907
1-1_GL0069012;14_GL0028185;6-3_GL0105993;Group2-3A_GL0100925;S-Fe20_GL0030613	16.029	14.615	16.457	15.4002	18.0045	19.1413	18.5205	18.3476	17.1075	17.5969	16.0451	16.1336	NA	18.0865	17.7405	18.4337	17.6983	18.2491	16.7622	17.0376	18.8551	16.7463	18.3792	18.3049
1-1_GL0069012;7-7_GL0023089;S-Fe20_GL0020046	13.8033	13.5713	13.217	13.3501	14.1932	14.3133	14.9799	14.3912	14.0499	12.6703	14.2113	14.41	14.6535	14.2786	14.9694	13.4846	14.418	14.7448	14.3724	14.0799	14.4657	13.0211	13.3817	12.6431
1-1_GL0069134	13.7945	14.3497	13.5987	14.0968	14.3109	14.208	14.3981	14.8219	12.5485	13.5451	13.2599	16.1809	15.2081	14.3652	14.9886	14.9131	15.4606	15.0518	13.3788	15.7369	13.8349	14.4139	14.9761	14.9877
1-1_GL0069134;2-1_GL0005249;2-7_GL0091106;2A-dyr14-06_GL0037258;6-4_GL0106904;Group2-2A_GL0004677;Group2-8A_GL0030196;MC-6-3_GL0079455	16.2272	15.8465	16.4667	15.7553	16.8067	16.867	17.8815	17.2038	16.2304	16.5166	17.3475	17.6792	16.721	16.9519	16.9486	17.2395	17.9711	17.1915	16.9843	17.4146	16.6757	15.7805	17.0325	17.3644
1-1_GL0069134;2-1_GL0005249;2-7_GL0091106;2A-dyr14-06_GL0037258;6-4_GL0106904;Group2-2A_GL0004677;MC-6-3_GL0079455	15.9828	16.2817	16.6761	15.9832	17.2848	17.1642	17.7514	NA	17.0379	16.5752	17.228	NA	17.3057	17.147	17.676	17.846	17.8395	17.1972	17.1367	17.0843	17.3656	15.9892	17.8985	17.2828
1-1_GL0069134;2-7_GL0091106	10.9305	9.59492	9.47982	NA	11.4552	10.2168	10.6637	NA	NA	NA	11.0616	NA	12.7523	11.3143	12.1001	NA	12.4822	11.0819	11.3836	NA	11.6317	10.4357	NA	NA
1-1_GL0069134;2-7_GL0091106;MC-6-3_GL0079455	13.2631	12.7157	13.0703	12.9043	13.5678	12.6432	13.4473	12.9875	12.6564	12.3758	13.9074	13.7493	15.0382	13.5356	14.0759	12.177	14.7176	14.2583	14.0934	NA	14.3655	NA	13.293	11.6327
11_GL0069170	13.0697	14.4577	12.7373	13.8809	14.7283	15.8944	15.1891	14.391	13.5021	14.8506	12.8768	14.5084	14.2549	14.9816	15.0564	15.0804	12.9115	14.585	14.0599	13.6457	14.7217	15.8314	14.9289	13.416
11_GL0069170;6-2_GL0007112;S-Fe20_GL0049163	14.0716	13.7028	13.918	13.3207	14.905	15.0353	14.8945	14.4631	NA	13.9925	NA	14.9427	17.6974	14.9652	15.5494	14.7295	14.5003	13.4357	16.8063	15.3135	15.8051	15.7462	14.7004	13.6241
11_GL0069170;S-Fe20_GL0049163	14.3836	13.9139	13.0501	13.4305	15.2198	16.5465	16.2479	14.8687	14.5955	14.8906	14.0626	14.6566	15.4899	15.2599	15.717	14.3814	13.6898	14.9068	15.4383	15.5089	16.1779	17.3696	15.8904	13.0148
11_GL0069306	NA	NA	NA	NA	16.2251	NA	NA	NA	NA	NA	NA	NA	16.4835	16.1627	16.5802	15.8683	17.9003	12.9355	NA	NA	18.3722	15.5096	11.3705	13.2572
1-1_GL0070410	15.8427	NA	15.309	14.1459	13.2922	16.326	15.7758	12.2861	13.2069	14.0187	12.9813	15.0083	12.7376	13.3501	14.8428	15.3424	14.0484	15.3624	15.5858	14.0154	14.0633	12.7455	15.9714	11.5449
1-1_GL0070410;1-1_GL0122934;1-4_GL0080002;MH-6-1_GL0099057;MH-6-4_GL0130457;S-Fe9_GL0263219	NA	NA	11.9583	10.3786	13.2384	12.3247	13.67	11.4717	11.5916	NA	NA	12.7477	13.407	13.7944	12.2286	12.8357	11.8531	NA	12.6175	NA	13.1604	NA	13.1597	12.1893
1-1_GL0070410;1-2_GL0113636	16.0079	NA	14.9531	14.6742	14.1465	16.0717	16.4827	13.4332	16.3202	14.7556	13.8749	16.5932	13.0315	14.2983	15.8596	15.8122	15.2299	14.9786	15.4007	15.0451	14.3041	11.6829	12.2497	10.7635
1-1_GL0070410;1-2_GL0113636;MC-0-1_GL0113705;MH-6-1_GL0099057	15.8555	NA	14.7173	14.3535	13.6276	15.8835	15.7449	12.1381	15.2358	15.081	13.2134	15.2043	12.6154	13.6265	15.5384	15.17	15.201	14.9175	14.9357	14.371	14.5303	NA	15.4689	11.9104
1-1_GL0070410;1-2_GL0113636;MH-6-5_GL0055981	NA	NA	NA	NA	NA	13.3563	NA	NA	NA	NA	NA	NA	NA	NA	11.5035	NA	12.1558	NA	11.7054	NA	NA	NA	11.4336	NA
1-1_GL0070410;1-8_GL0071629;MC-0-3_GL0096743	13.2636	NA	14.3851	12.5853	12.5639	11.4818	13.3093	NA	NA	13.6401	NA	NA	NA	12.7606	NA	14.346	14.5479	13.8889	11.5875	NA	NA	NA	NA	NA
1-1_GL0070410;MC-0-3_GL0096743	17.8492	12.6859	16.4518	15.2506	15.4942	17.1295	17.7219	13.1312	17.0858	16.5967	14.767	17.1231	14.0214	15.4948	17.5325	17.173	17.0561	16.6183	16.6735	16.3266	15.9361	12.8162	17.1443	13.2855
1-1_GL0070410;MH-6-1_GL0099057	16.7694	NA	15.1074	14.2389	13.3146	16.2889	15.9713	11.5772	13.4582	13.5123	13.3807	15.1936	11.9445	13.4618	15.1508	15.6689	13.3952	15.2194	15.2225	13.7023	14.557	NA	15.8812	12.048
11_GL0070877;1A-dyr2-07_GL0000560;1A-dyr4-07_GL0087490;8-1_GL0050324;8-2_GL0134682;8-8_GL0070726;Group2-2A_GL0080405;S-Fe3_GL0136318	NA	NA	NA	NA	NA	NA	NA	NA	NA	NA	NA	13.1173	14.8151	NA	NA	NA	NA	NA	NA	NA	13.7814	NA	NA	NA
11_GL0070885;2-4_GL0084012;6-2_GL0078653;G1-1A_GL0082976	13.0887	NA	12.2758	NA	13.1135	11.5231	13.3508	11.8904	12.3386	NA	NA	13.226	12.6663	13.3168	13.4874	12.8572	12.0801	12.0438	13.269	14.089	12.4883	12.3176	11.4047	12.0409
1-1_GL0071681	NA	NA	NA	12.779	11.4651	11.1896	10.032	12.8698	NA	NA	NA	NA	11.0216	11.6975	9.58504	NA	NA	NA	NA	NA	11.3142	14.5904	NA	9.69982
1-1_GL0071681;19_GL0028928	NA	11.7537	NA	14.5768	11.7663	11.1928	9.58853	11.874	11.031	NA	NA	NA	11.8484	11.7285	NA	NA	NA	NA	NA	NA	11.7504	15.6977	NA	NA
11_GL0071971	15.0341	13.8444	14.2471	13.6933	NA	12.3234	NA	13.651	11.9081	13.7556	13.6864	13.624	NA	NA	NA	NA	12.7162	NA	11.7535	12.8971	NA	NA	NA	NA
1-1_GL0072113	NA	NA	NA	NA	NA	NA	NA	NA	NA	NA	12.7041	NA	NA	12.1847	NA	NA	12.4495	NA	13.3286	NA	12.1146	NA	NA	NA
1-1_GL0072113;1-1_GL0151547	NA	NA	NA	NA	9.25715	NA	NA	NA	NA	NA	NA	NA	NA	NA	10.489	NA	NA	NA	NA	NA	NA	NA	NA	NA
11_GL0072670	NA	13.4306	NA	NA	NA	15.3913	NA	NA	14.0936	NA	NA	NA	13.689	NA	NA	14.4107	NA	NA	NA	NA	NA	14.9923	14.254	NA
11_GL0072994	NA	NA	NA	NA	12.1968	13.1781	14.1989	12.1686	NA	NA	NA	NA	NA	12.3318	NA	11.2006	NA	NA	NA	10.5131	11.6654	NA	12.1085	NA
1-1_GL0073107	11.7676	10.9488	NA	12.8812	13.9124	13.7807	12.7232	13.5613	11.0403	10.7792	12.9296	11.3889	14.0418	14.0662	13.8588	12.6812	12.1732	NA	13.4099	13.0875	14.2202	14.8815	11.9769	13.1111
1-1_GL0073107;11_GL0021701;20_GL0040658;50_GL0015409;6-6_GL0043770;8-5_GL0025241;MH-6-5_GL0010319;S-Fe20_GL0089130	14.0937	14.5409	13.7178	14.8697	15.2811	15.8457	14.7606	NA	14.6923	15.1789	14.7293	NA	NA	15.328	15.1578	15.2353	14.0315	15.2296	15.3009	14.3033	NA	15.0419	NA	14.9153
1-1_GL0073107;11_GL0021701;20_GL0040658;6-6_GL0043770;MH-6-5_GL0010319	NA	11.4771	NA	12.7142	12.6941	13.3994	14.124	14.1481	12.1664	12.8981	11.9923	11.7241	12.6317	13.3005	11.695	10.5344	13.8349	12.1906	13.1032	12.3076	14.4007	15.0067	13.3299	13.8609
1-1_GL0073107;11_GL0021701;6-6_GL0043770	14.8469	14.604	14.1136	14.5012	15.5692	17.465	16.6582	15.4174	15.4732	16.1235	14.5919	15	15.164	15.4813	15.7096	15.9676	14.7229	15.5025	15.638	15.1259	16.3017	17.1355	15.8354	15.0846
1-1_GL0073107;11_GL0021701;6-6_GL0043770;MH-6-5_GL0010319	NA	NA	NA	12.0932	11.6157	12.952	11.6538	NA	NA	11.6048	NA	NA	NA	11.9386	NA	11.7426	NA	12.531	11.9817	NA	NA	NA	NA	11.0998
1-1_GL0073437	NA	NA	12.9112	NA	13.5579	14.3175	NA	12.3326	14.3338	NA	12.6753	NA	NA	13.3825	12.2814	NA	14.6904	13.3525	14.15	12.6761	14.259	NA	NA	12.6551
1-1_GL0073618	NA	NA	10.8856	NA	14.4165	13.7698	14.8946	16.264	13.3197	NA	NA	12.4739	NA	14.67	13.3668	NA	12.0508	16.1267	NA	14.0017	16.3084	NA	16.0948	14.0865
11_GL0073714	NA	NA	13.4592	NA	13.6186	14.1229	15.0063	13.5214	NA	NA	NA	NA	11.2385	13.8578	10.9154	14.1355	NA	12.2597	12.3081	12.2396	12.4124	9.89761	14.1983	NA
1-1_GL0074148	14.3248	14.3984	13.8456	15.0794	15.2351	16.0995	16.0174	14.8479	15.9127	14.6257	16.063	14.968	12.1468	15.4777	NA	NA	16.143	14.421	15.4092	15.4114	14.2909	13.9314	12.4532	15.1869
1-1_GL0074148;Group2-6A_GL0046013	14.8209	14.9367	13.7926	16.2845	15.8343	16.5342	16.2149	15.6704	16.2676	15.5367	16.51	15.8848	15.093	15.6522	16.7562	15.4521	16.0964	15.3051	15.8698	15.7111	14.7902	16.3838	15.7673	15.8222
11_GL0074655	NA	NA	11.8743	NA	12.8121	14.1421	14.0187	13.5534	NA	NA	NA	NA	11.8171	13.0838	NA	14.9731	NA	12.3248	12.2213	12.7004	12.1789	NA	14.7685	NA
1-1_GL0074860;17_GL0049919;1A-dyr1-07_GL0006858;1A-dyr2-07_GL0078401;2-1_GL0066207;2-7_GL0087859;4-1_GL0083000;7-8_GL0061993;8-2_GL0041742;8_GL0175912;G1-5A_GL0040449;MC-6-2_GL0166527;S-Fe12_GL0145311	16.9288	13.7496	14.3423	13.9483	16.9747	15.816	18.076	15.852	15.8421	14.7357	16.4145	16.5305	16.8662	17.2634	17.2998	14.625	15.478	15.4382	17.4727	17.2254	17.4794	15.3925	15.4591	15.3358
1-1_GL0074860;17_GL0049919;1A-dyr1-07_GL0006858;1A-dyr2-07_GL0078401;2-2_GL0155297;2-7_GL0087859;35_GL0082428;4-1_GL0075275;4-1_GL0083000;5-8_GL0014983;7-8_GL0061993;8-2_GL0009559;8-2_GL0041742;8_GL0175912;G1-5A_GL0040449;Group2-3A_GL0214811;MC-6-2_GL0166527;S-Fe12_GL0144225;S-Fe12_GL0145311	14.8382	13.2855	13.1547	13.9433	15.9647	15.1383	15.7407	NA	16.0607	13.791	14.7037	NA	NA	15.6991	12.7813	14.3458	15.202	14.5494	15.5477	15.4517	16.389	13.7954	15.5439	14.3453
1-1_GL0074860;17_GL0049919;1A-dyr1-07_GL0006858;2-1_GL0066207;2-2_GL0155297;2-7_GL0087859;26_GL0125109;35_GL0082428;4-1_GL0075275;4-1_GL0083000;4-8_GL0058658;5-8_GL0014983;7-6_GL0106278;7-8_GL0061993;8-2_GL0009559;8-2_GL0041742;8_GL0175912;G1-1A_GL0037992;G1-5A_GL0040449;Group2-3A_GL0214811;MC-6-2_GL0166527;S-Fe12_GL0144225;S-Fe12_GL0145311;S-Fe20_GL0044944	14.1571	11.7447	12.0193	12.9108	15.6469	15.471	16.1212	15.132	14.2262	13.524	14.0456	14.7631	16.6511	15.6147	12.9383	13.7565	15.4083	14.3584	15.7544	14.6967	15.7351	14.5031	14.5604	12.8287
1-1_GL0074860;17_GL0049919;1A-dyr1-07_GL0006858;2-1_GL0066207;2-2_GL0155297;2-7_GL0087859;26_GL0125109;35_GL0082428;4-8_GL0058658;5-8_GL0014983;7-6_GL0106278;7-8_GL0061993;8-2_GL0009559;8_GL0175912;G1-5A_GL0040449;Group2-3A_GL0214811;MC-6-2_GL0166527;S-Fe12_GL0145311;S-Fe20_GL0044944	NA	NA	NA	NA	NA	NA	NA	12.6832	NA	NA	NA	12.7696	NA	NA	NA	NA	NA	NA	NA	NA	11.7346	NA	NA	NA
1-1_GL0074860;1A-dyr1-07_GL0006858;1A-dyr2-07_GL0078401;2-1_GL0066207;2-7_GL0087859;35_GL0082428;7-8_GL0061993;Group2-3A_GL0214811;S-Fe12_GL0145311	16.5703	15.2773	14.8815	15.7147	16.7401	15.7954	16.8882	16.1209	15.9676	14.3752	15.9691	16.3176	17.3248	16.6178	14.6897	15.8815	16.1222	15.2053	16.8209	16.7995	17.0632	14.2398	16.2447	15.8573
1-1_GL0074860;2-1_GL0066207;4-1_GL0075275;G1-5A_GL0040449;MC-6-2_GL0166527;S-Fe12_GL0144225;S-Fe12_GL0145311	13.9892	11.7074	12.1294	12.7657	14.5661	13.2887	14.0835	12.3858	14.1129	NA	13.1753	13.3382	14.4801	14.5405	14.9322	13.5599	11.8952	12.1579	14.8935	14.5936	14.595	13.2775	12.1067	11.8426
1-1_GL0074860;2-1_GL0066207;G1-5A_GL0040449;MC-6-2_GL0166527	17.505	14.6227	15.232	14.4831	17.7041	16.1293	18.2384	15.7044	16.0203	13.8934	16.8415	16.6951	16.8944	17.7128	17.5905	15.1987	15.2897	15.8082	17.8958	17.4032	17.6977	14.9009	15.6492	15.3384
1-1_GL0074860;2-1_GL0066207;G1-5A_GL0040449;MC-6-2_GL0166527;S-Fe12_GL0145311	17.6129	14.0124	15.3499	14.1529	17.4115	16.3233	18.1476	15.6666	16.1761	15.8182	16.778	16.7632	17.3348	17.4334	17.8521	15.4858	15.5672	16.3691	17.7218	17.536	17.3192	14.3498	15.5217	15.9237
1-1_GL0074860;35_GL0082428;G1-5A_GL0040449;Group2-3A_GL0214811;MC-6-2_GL0166527	NA	NA	NA	NA	NA	9.89192	NA	9.85742	NA	NA	NA	NA	NA	NA	NA	NA	NA	NA	NA	NA	NA	NA	NA	NA
1-1_GL0074860;35_GL0082428;Group2-3A_GL0214811	15.8254	14.8284	15.5192	15.1653	17.0804	15.8192	17.3282	16.4745	16.8193	15.2879	15.5708	14.9851	17.2434	16.8835	17.9403	16.4584	16.9467	17.1384	15.6115	15.3761	17.4408	15.9965	16.8187	16.4905
1-1_GL0074860;7-8_GL0061993;G1-5A_GL0040449;MC-6-2_GL0166527	14.8155	NA	NA	NA	14.6043	NA	14.8748	NA	NA	NA	NA	NA	13.4223	14.4277	NA	NA	NA	NA	NA	NA	NA	NA	NA	NA
1-1_GL0074860;G1-5A_GL0040449	14.0252	NA	NA	NA	NA	NA	13.4305	13.9302	NA	NA	12.9024	15.5283	NA	NA	NA	NA	NA	NA	13.718	14.6069	NA	NA	NA	NA
1-1_GL0074860;G1-5A_GL0040449;MC-6-2_GL0166527	16.8243	13.8498	14.8114	14.2228	17.4307	16.5739	17.9195	15.8461	15.6731	15.0324	16.2449	16.7411	17.1517	17.3827	17.7049	15.754	15.672	15.9916	16.8088	17.5087	17.1396	14.0896	15.4178	16.0508
1-1_GL0075236;1-1_GL0090446;1A-dyr1-07_GL0002549	12.7067	12.8217	12.4782	12.0773	13.9366	13.7044	14.1016	13.5662	NA	NA	13.4954	13.0089	13.2747	14.1094	13.1783	12.2602	13.1757	12.681	14.3743	12.1834	15.6445	11.5412	13.5415	12.209
1-1_GL0075563	13.6235	13.4491	13.1395	14.2972	14.5632	15.5321	15.5113	15.0937	14.2476	13.27	14.0583	12.7365	14.5092	14.5638	15.0867	12.9178	15.2648	14.4378	14.8513	13.5394	13.5176	14.4595	14.0352	13.8645
1-1_GL0075563;11_GL0147814;1A-dyr2-07_GL0032467;1_GL0011591;2-1_GL0024070;2-3_GL0062050;5-8_GL0134264;6-2_GL0004784;8-1_GL0061360;8_GL0136605;G1-5A_GL0013883;Group2-2A_GL0055732;Group2-6A_GL0004850;S-Fe12_GL0209882	15.7328	15.1161	15.0884	15.3552	16.8467	16.967	16.8158	16.3823	16.6681	14.6052	16.1986	16.6725	17.1046	17.0105	16.8254	16.2367	15.9495	16.2658	17.1023	16.6822	16.7649	16.7612	15.8335	15.9231
1-1_GL0075563;11_GL0147814;2_GL0124299;8-2_GL0105769;8-5_GL0001109;8_GL0136605;G1-5A_GL0013883	13.3998	15.4376	NA	15.47	17.0634	17.2062	16.5084	17.3846	15.6524	15.4485	15.5788	15.5765	16.8709	17.1071	17.2331	15.454	16.2478	17.307	17.3116	16.2774	15.5164	16.6852	15.9568	15.9671
1-1_GL0075563;2_GL0124299;8-2_GL0105769;8-5_GL0001109;Group2-6A_GL0004850	11.4736	11.466	10.9711	11.6494	13.2335	13.6185	14.5106	13.4782	12.6894	10.6257	12.082	10.4566	12.7363	13.3903	13.6953	12.5599	13.3872	12.3775	11.8914	11.4764	12.5955	13.6884	12.2091	12.3289
1-1_GL0075654	13.7015	13.9308	13.7942	13.7986	13.3282	13.2122	NA	12.9365	12.7094	12.0051	13.6678	11.7423	14.3856	13.5526	14.4194	NA	NA	NA	13.7415	12.8516	13.5161	13.816	13.5468	NA
1-1_GL0075654;2-1_GL0063170	NA	NA	NA	NA	11.7087	NA	NA	NA	11.3772	NA	NA	11.8557	12.4519	11.8011	12.71	NA	NA	NA	12.3764	12.1142	12.2357	NA	12.3417	NA
1-1_GL0076153	NA	NA	14.7317	13.1691	13.3862	13.9264	13.1366	12.5336	13.5802	13.3875	13.3492	16.2119	NA	14.0351	NA	NA	13.6914	14.3694	14.1091	10.9289	12.3299	12.6037	NA	NA
11_GL0076757	NA	NA	15.363	13.4898	14.2314	14.2544	14.6885	14.7307	NA	11.453	12.5444	NA	13.7194	14.2644	13.9842	15.7093	14.5453	14.1646	12.6238	13.4084	15.3358	14.194	16.4294	13.0596
1-1_GL0077500	11.311	11.1971	12.8183	11.6295	12.8552	12.0174	12.3971	12.9218	11.8049	11.5509	NA	12.0773	12.0391	12.1286	12.6543	11.9984	11.9451	12.9175	11.5498	11.8027	NA	13.1873	12.5241	13.1691
1-1_GL0077500;Group2-1A_GL0067990;S-Fe10_GL0105436	12.3482	NA	12.8273	12.947	14.5467	15.0094	14.9141	13.7767	14.3185	14.0719	NA	NA	14.0954	14.8687	13.871	13.3273	13.898	13.7719	14.0655	13.4074	13.9336	12.8952	12.6487	14.3387
1-1_GL0077500;S-Fe10_GL0105436	12.198	NA	12.6248	13.4127	14.2266	14.2127	13.3648	13.1202	13.2874	13.6369	13.0217	13.3651	NA	14.3747	12.4618	11.8342	13.7298	12.555	14.1564	13.4743	12.643	NA	NA	13.2072
1-1_GL0077524	11.0514	14.622	11.6226	NA	15.3473	14.7587	13.9207	14.0078	13.757	NA	14.3292	14.6945	16.008	15.2445	13.2045	NA	12.3417	NA	14.2607	14.5352	14.2594	14.2486	14.2818	14.4915
1-1_GL0077524;2-2_GL0126451;4-3_GL0080010	NA	16.166	14.6987	15.8156	18.0666	17.1237	15.0486	NA	NA	NA	18.6468	16.3993	17.0287	18.1758	19.7008	NA	15.739	16.3183	16.6781	17.8661	14.8357	15.2323	14.6055	NA
1-1_GL0077781	12.3093	13.3628	12.8719	14.0746	13.3448	13.4304	11.169	12.1483	11.648	NA	12.5442	NA	14.0133	13.4044	14.0411	12.4424	NA	9.80025	13.1966	12.5482	12.9445	14.4213	NA	NA
1-1_GL0077781;G1-1A_GL0096658;MC-0-3_GL0016776;MH-0-4_GL0056065	14.8545	14.5768	NA	14.9978	14.2173	14.8914	12.2837	NA	12.9371	NA	14.9123	NA	14.5215	13.9763	14.9736	13.8708	NA	12.9583	14.5188	14.5768	NA	15.5727	NA	NA
1-1_GL0077794	11.4545	13.043	12.0834	13.1781	11.9918	NA	NA	NA	NA	NA	NA	NA	13.1467	12.2733	12.2538	NA	NA	NA	NA	NA	12.1923	12.8112	12.0668	NA
1-1_GL0078624	NA	NA	10.2853	NA	13.561	NA	NA	NA	12.2445	12.8112	NA	13.1297	14.1267	13.2575	NA	NA	11.9182	14.1528	12.8876	13.3228	14.2781	NA	11.846	10.4395
1-1_GL0078624;1A-dyr2-07_GL0017940;32_GL0021838;6-2_GL0018346;6-4_GL0066269	NA	NA	NA	11.2122	13.2082	13.9469	NA	13.138	12.9998	NA	NA	12.7429	13.8616	13.1749	13.195	12.2275	13.0251	NA	13.6288	12.7558	13.665	NA	12.6306	11.756
1-1_GL0078624;2-1_GL0043938;2-1_GL0061307;2-1_GL0106976;32_GL0021838;4-1_GL0035742;4-1_GL0052696;4-8_GL0070713;5-1_GL0042433;6-7_GL0028379;6-7_GL0120327;7-3_GL0054179;7-5_GL0104959;G1-8A_GL0042005	NA	NA	NA	12.7005	17.0471	NA	14.2528	NA	NA	NA	NA	NA	NA	16.4225	NA	16.1936	16.3306	11.877	NA	NA	14.4034	NA	NA	NA
1-1_GL0078624;2-1_GL0106976;32_GL0021838;4-1_GL0035742;4-1_GL0052696;4-8_GL0070713;5-1_GL0042433;6-7_GL0028379;7-3_GL0054179	18.1475	16.2832	16.9133	16.7625	18.6541	17.034	18.3024	16.7994	17.6416	15.909	18.507	17.9638	19.3088	18.6627	19.0735	17.5403	16.8862	17.3312	18.7661	18.5545	18.3774	17.0815	17.0056	16.7665
1-1_GL0078624;32_GL0021838;4-1_GL0052696;4-8_GL0070713;5-1_GL0042433;6-7_GL0028379;6-8_GL0062756	14.6084	15.2702	15.8976	15.6441	18.0662	15.4	16.9442	NA	16.7308	15.7092	16.3683	15.348	18.8606	17.7983	16.7355	16.6779	15.8502	15.5576	17.7111	15.7511	18.4198	15.7462	16.2106	15.3015
1-1_GL0078624;Group2-8A_GL0129562	NA	NA	NA	NA	NA	NA	NA	NA	NA	NA	NA	NA	NA	NA	NA	NA	10.2416	NA	NA	NA	NA	NA	NA	NA
1-1_GL0078745	11.5342	NA	11.4375	10.1831	13.039	12.5046	13.5325	12.5408	13.488	10.3512	12.2459	11.8824	13.3537	13.4215	12.845	11.5516	11.7041	11.3644	13.251	12.5167	12.6836	13.1204	11.9851	10.1931
1-1_GL0078756	13.5585	12.3977	12.3579	12.4405	14.699	14.0914	15.1206	13.4965	13.2217	12.2608	13.6093	13.4025	14.9846	14.7382	13.835	13.7488	13.4459	13.9239	14.2601	12.7652	14.3367	12.8936	12.8178	13.2887
11_GL0079244	NA	12.7263	11.8825	NA	13.7753	13.5461	13.318	13.7017	13.3518	NA	NA	NA	NA	13.8609	NA	NA	13.7997	NA	14.5327	NA	14.3818	15.3032	NA	12.5013
11_GL0079244;11_GL0161216;2A-dyr16-07_GL0072430;6-7_GL0102956;G1-5A_GL0048563	12.568	11.9958	11.568	11.3169	12.347	13.0263	NA	10.4873	11.9708	NA	11.0919	NA	11.5797	12.3201	12.4834	11.5773	11.3989	11.6377	12.8442	11.5153	12.2955	14.7113	11.4001	13.6598
11_GL0079244;6-7_GL0102956;G1-5A_GL0048563	10.6725	NA	NA	NA	NA	12.1404	NA	NA	NA	NA	NA	NA	NA	NA	NA	NA	NA	NA	12.5154	NA	NA	13.7885	NA	11.633
1-1_GL0080453	12.2639	14.0761	12.0976	14.1672	12.4416	15.0198	12.9404	14.0648	12.2179	12.5826	13.2107	12.4866	12.5405	12.5397	12.7602	NA	12.653	12.3966	12.9044	12.306	12.945	12.5185	12.2675	11.8051
1-1_GL0080583	14.4634	16.8215	15.3117	17.1856	14.8873	16.2895	14.5785	15.9365	14.7299	15.4043	15.1957	14.6225	14.3474	14.8703	13.9942	13.4035	15.1197	14.9702	15.155	14.5854	14.4625	14.2007	14.7469	14.3392
1-1_GL0080605	12.9494	15.6536	13.3218	15.8638	14.3887	15.6497	13.7526	15.1415	13.9397	14.9561	14.1922	13.7982	13.8162	14.3525	13.4076	12.7209	13.7377	14.6661	13.9955	13.6873	13.7462	13.8735	13.4975	13.5087
1-1_GL0080606	12.7196	15.5269	13.195	15.5851	14.1647	15.4212	13.7699	14.8694	13.9715	14.9403	14.2839	13.5505	13.6739	14.1838	13.0754	12.8029	13.7683	14.4379	13.7621	13.5725	13.6771	13.5001	13.2739	13.441
1-1_GL0080710	13.6215	14.3067	14.1378	14.9424	NA	NA	NA	NA	NA	NA	NA	15.9696	13.2479	NA	12.6151	14.485	NA	14.1993	NA	NA	14.0614	NA	NA	NA
1-1_GL0080710;1-2_GL0126535;11_GL0060737;2-1_GL0115202;2-4_GL0063036;2-6_GL0065005;3-5_GL0058721;47_GL0080996;G1-8A_GL0090415;S-Fe11_GL0081509	17.7348	15.8012	16.3297	15.8655	17.7672	16.3051	18.1761	17.6754	16.1896	16.7728	17.7939	17.6202	17.3081	17.7572	17.6618	17.7851	16.5207	17.3412	17.3824	17.8219	17.6245	14.0049	17.3383	16.4362
11_GL0081446	NA	15.2073	NA	14.1122	13.7311	16.7741	14.9978	14.7245	13.1858	14.3208	NA	NA	NA	13.9222	13.0278	14.5961	NA	NA	NA	NA	12.5307	14.7605	12.5566	13.2544
11_GL0081446;11_GL0154813	NA	15.5169	NA	13.8636	14.7193	17.8953	16.1022	15.3177	14.0166	14.6409	NA	NA	NA	14.7304	13.5642	16.048	NA	NA	NA	NA	12.8548	15.5715	12.1068	14.224
11_GL0081716	NA	NA	NA	NA	12.7567	NA	NA	NA	NA	NA	NA	NA	12.934	12.7033	11.1663	12.0824	14.1605	NA	NA	NA	14.8845	12.913	12.6104	NA
11_GL0081716;1A-dyr4-07_GL0086302;2_GL0037426;S-Fe7_GL0247586	NA	NA	16.2797	13.361	15.0064	15.8358	16.3155	15.3197	13.7628	13.7513	NA	11.9464	14.6186	15.2126	14.5683	16.6884	15.3954	14.8815	13.3908	14.3437	16.3175	14.9241	16.9332	12.5276
11_GL0081716;2_GL0037426	12.5863	NA	16.3039	NA	16.1864	16.2587	17.3132	16.4544	NA	NA	NA	NA	15.467	16.344	15.2993	17.2229	15.6242	14.997	13.8987	14.917	17.0031	16.2748	16.9733	11.5574
11_GL0081716;2_GL0037426;S-Fe7_GL0247586	NA	NA	14.2935	NA	14.2963	16.0184	16.2063	15.5675	NA	NA	NA	NA	13.7416	14.3187	13.7494	15.3927	14.1105	13.8448	12.9314	13.1617	15.3117	13.4262	15.31	NA
1-1_GL0081980;1-1_GL0082828;10_GL0033898;10_GL0051405;11_GL0155661;4-3_GL0000037;6-7_GL0104531;Group2-2A_GL0072575;MC-6-2_GL0032211;S-Fe9_GL0104873;S-Fe9_GL0216320	NA	11.4241	12.7819	12.298	14.5585	14.4152	15.1846	NA	NA	NA	NA	NA	13.1982	14.332	13.6817	13.2362	13.8598	13.3988	13.4945	NA	NA	13.2438	14.6792	13.1512
1-1_GL0082194	13.8137	13.2631	13.393	13.4596	12.3669	13.2555	12.288	13.249	13.0813	NA	13.9908	12.656	12.7766	12.5175	13.5487	13.188	12.6584	11.2449	14.4864	13.4149	12.5156	13.8473	12.2625	NA
1-1_GL0082828	12.2195	12.0023	NA	13.1246	NA	NA	NA	NA	NA	NA	NA	NA	13.5573	NA	13.0926	12.988	NA	NA	13.3119	NA	13.8784	NA	12.8539	NA
1-1_GL0082828;11_GL0155661	NA	NA	NA	NA	13.3112	13.7928	13.9494	NA	NA	NA	NA	13.2292	13.7961	13.3124	12.821	14.4865	12.6584	13.3183	13.9795	13.247	13.9482	13.4366	13.4864	NA
1-1_GL0082828;2-1_GL0105994;2-4_GL0036412;4-8_GL0033432;6-1_GL0062491;G1-8A_GL0133168	11.6677	NA	NA	NA	NA	NA	NA	NA	NA	NA	NA	NA	NA	NA	NA	NA	NA	NA	NA	NA	NA	NA	NA	NA
1-1_GL0082829	NA	12.6225	NA	12.7371	NA	NA	NA	NA	NA	NA	NA	NA	NA	NA	NA	12.56	NA	NA	NA	NA	NA	NA	NA	NA
1-1_GL0082829;11_GL0051057	11.4668	12.7098	14.1204	13.569	12.9534	NA	14.4049	NA	NA	NA	NA	NA	NA	13.0712	12.9146	13.6067	NA	NA	NA	14.1482	NA	NA	NA	14.5164
1-1_GL0082829;11_GL0155660;17_GL0098350;1_GL0038377;2-1_GL0052359;2-1_GL0064618;2-1_GL0079956;2-2_GL0060647;2-3_GL0101170;3-6_GL0039132;34_GL0024708;Group2-1A_GL0062679;Group2-7A_GL0080216	13.5591	NA	NA	13.6144	15.7005	16.2763	16.1836	18.3251	13.4296	NA	13.9495	14.2762	15.0296	15.3847	15.2709	13.6812	13.7443	13.5209	15.1004	15.3575	14.2873	15.1147	15.0062	13.7231
1-1_GL0082829;2-1_GL0052359;4-2_GL0117370;4-8_GL0033433;5-1_GL0073748;G1-4A_GL0014180;Group2-1A_GL0062679;MC-6-1_GL0066073;S-Fe8_GL0195589	NA	NA	11.1617	NA	12.3244	NA	NA	NA	11.8659	NA	NA	NA	12.9971	12.3362	NA	11.7595	12.3508	NA	NA	NA	11.972	NA	NA	NA
1-1_GL0082854;1-1_GL0111479;1-2_GL0110297;3-4_GL0054324;37_GL0013375;40_GL0077841	12.0558	13.3396	13.8906	13.3964	13.413	14.0776	NA	14.1541	14.5973	14.1473	13.6592	11.892	12.4185	13.4136	13.5181	14.1863	15.0575	14.2961	14.5084	12.5866	14.0618	NA	NA	13.921
1-1_GL0082854;1-1_GL0111479;1-2_GL0110297;3-4_GL0054324;37_GL0013375;4-3_GL0065508;40_GL0077841;S-Fe11_GL0142965;S-Fe16_GL0017477	NA	NA	NA	NA	NA	NA	NA	12.5306	NA	NA	NA	10.2634	NA	NA	NA	NA	NA	NA	NA	NA	NA	NA	NA	NA
1-1_GL0082854;1-1_GL0111479;37_GL0013375;40_GL0077841;S-Fe11_GL0142965	13.8155	14.5021	15.2952	15.0406	16.6769	16.5985	12.4577	16.6038	17.8008	15.1023	14.5782	NA	15.3549	16.5223	14.5833	NA	17.5047	16.1119	16.6878	14.6383	17.4405	NA	12.9466	15.4584
1-1_GL0082854;1-2_GL0110297;3-4_GL0054324	13.8125	13.9799	11.702	15.2516	NA	NA	NA	NA	NA	NA	NA	11.6939	NA	NA	13.7628	15.8571	NA	14.1307	NA	13.2333	13.5765	12.2247	NA	NA
1-1_GL0083048	13.4692	NA	NA	NA	16.0928	12.9481	NA	15.9123	15.1746	15.8245	12.587	16.2571	19.0522	15.9726	17.3816	10.5584	17.7157	16.1039	16.7551	14.4669	17.6883	NA	14.9483	12.5164
1-1_GL0083048;1-1_GL0095104;1-1_GL0110655;1A-dyr2-07_GL0038040;20_GL0029051;23_GL0079503;29_GL0067888;43_GL0108847;5-5_GL0065367;5-7_GL0133472;5-8_GL0037172;5-8_GL0061093;6-5_GL0134330;G1-3A_GL0041147;G1-3A_GL0131986;Group2-4A_GL0009226;MH-6-1_GL0097407;MH-6-2_GL0028666;MH-6-3_GL0042795;S-Fe2_GL0195698	17.9513	18.4556	19.0037	19.2221	19.5267	18.0739	18.9918	NA	NA	18.9169	19.3452	NA	NA	19.6503	19.4136	19.9762	18.9924	19.5694	19.3973	18.0939	NA	18.9947	NA	19.1155
1-1_GL0083048;1-1_GL0095104;17_GL0105836;20_GL0029051;5-5_GL0065367;6-3_GL0103114;MH-6-1_GL0097407;MH-6-2_GL0012694;MH-6-5_GL0099912;MH-6-5_GL0136824;MH-6-5_GL0183530;S-Fe2_GL0026209	NA	NA	NA	NA	NA	NA	NA	11.5712	NA	NA	NA	NA	NA	NA	NA	NA	NA	NA	NA	NA	NA	NA	NA	NA
1-1_GL0083048;1-4_GL0080357;1A-dyr4-07_GL0018595	NA	NA	11.339	NA	15.961	NA	NA	NA	NA	NA	NA	NA	16.9786	15.9371	16.9972	NA	18.1547	13.6969	16.2867	NA	16.1286	NA	14.7264	NA
1-1_GL0083048;35_GL0136148;5-5_GL0065367;5-7_GL0133472;6-3_GL0103114;7-8_GL0038775;MH-6-1_GL0000008;S-Fe2_GL0195698;S-Fe3_GL0215405	18.7197	NA	18.6784	19.3352	19.6486	19.6375	19.3765	19.6029	19.8233	18.0325	19.6765	18.6996	20.3389	NA	20.3794	19.0901	19.305	19.6234	19.9843	18.8976	20.2655	19.6597	19.1781	18.186
1-1_GL0083048;MH-6-3_GL0042795	NA	NA	NA	NA	11.7801	NA	11.1971	11.9245	NA	NA	9.10855	NA	14.0338	11.6392	NA	NA	11.6383	12.3137	NA	NA	12.4556	13.3875	11.773	NA
1-1_GL0083104;20_GL0132019;8-2_GL0038717;MC-6-5_GL0126588;MH-6-3_GL0019229	NA	9.82889	NA	10.5553	10.6207	10.547	NA	8.09846	NA	NA	10.3608	NA	11.4134	NA	10.7339	8.78961	8.77473	NA	10.8611	NA	10.4229	11.4738	NA	NA
1-1_GL0083104;MH-6-3_GL0019229	NA	NA	NA	NA	NA	NA	NA	NA	NA	NA	NA	NA	NA	NA	11.7597	NA	NA	NA	NA	NA	NA	12.4983	NA	NA
11_GL0083465;35_GL0082816	12.9168	13.2039	11.8166	14.2642	14.052	14.9687	15.1005	15.7062	14.3616	11.6599	13.6392	12.7496	14.2934	14.1828	14.8598	13.0754	14.8093	13.9734	14.6738	12.8034	14.3062	14.2353	14.4157	13.4241
1-1_GL0083557;MC-0-1_GL0012723	11.7152	13.5867	NA	13.8119	12.4189	12.9499	11.6836	12.1956	12.1715	11.8344	12.704	11.9954	12.9876	12.8563	11.9818	NA	12.4767	NA	12.6425	12.2688	11.9037	12.2649	11.5379	NA
1-1_GL0083557;MC-0-1_GL0012723;S-Fe10_GL0012234	13.4629	15.0531	14.3504	15.67	14.3692	14.6106	12.6807	14.117	13.6849	13.0652	14.7384	13.4862	15.4709	14.2922	14.3045	13.0242	12.7654	NA	14.6611	13.3966	14.0856	14.1675	13.2503	NA
1-1_GL0083995;11_GL0014135;6-6_GL0074506;Group2-8A_GL0077290	NA	NA	NA	NA	NA	12.7508	NA	NA	10.4371	NA	NA	11.0033	13.7388	NA	NA	NA	NA	NA	NA	NA	12.1631	NA	NA	NA
1-1_GL0083995;2-3_GL0062049;Group2-8A_GL0077290	15.7039	NA	NA	12.1232	12.936	12.7829	14.2952	NA	NA	NA	14.6763	14.8492	13.1093	12.9617	12.5991	NA	12.4257	12.6143	15.684	16.2362	13.0849	NA	12.3414	NA
1-1_GL0083995;Group2-8A_GL0077290	12.8357	11.9862	11.1838	NA	12.424	11.9554	12.3603	NA	NA	NA	11.3911	NA	NA	12.4995	12.2721	NA	10.339	10.5651	13.3426	NA	13.641	NA	NA	11.6126
1-1_GL0084350	15.9898	15.3992	15.901	13.5652	14.1656	12.7709	12.752	12.9656	14.5693	12.8028	14.9379	13.4637	14.2125	14.2341	14.1632	12.5493	12.4509	12.6561	14.2867	13.8182	13.3962	15.1868	15.1625	11.9158
1-1_GL0084350;16_GL0036423	NA	NA	NA	NA	NA	NA	NA	12.8633	NA	NA	NA	13.0516	11.7927	NA	NA	NA	NA	NA	NA	NA	12.6331	NA	11.5406	NA
1-1_GL0084994;Group2-4A_GL0034379	NA	11.6541	NA	14.2248	13.5441	14.6129	14.2271	14.6078	13.4052	12.8456	12.6538	NA	13.0894	13.6859	12.6856	12.7878	13.4008	13.3318	12.3939	NA	12.6033	15.8672	NA	12.7142
1-1_GL0085365	10.8946	13.465	NA	13.9229	13.0113	14.3063	12.5968	13.1719	NA	12.2351	12.4323	12.3257	12.1053	13.1341	12.5644	NA	12.5275	13.1676	13.0057	12.3218	12.4014	13.0892	13.3054	NA
1-1_GL0085365;40_GL0063975;MH-0-4_GL0006010;S-Fe10_GL0012304;S-Fe5_GL0040685	16.5047	17.0653	16.8418	17.881	16.6651	17.396	15.5547	17.2197	16.268	16.2765	16.5534	15.5843	16.2489	16.5204	16.9586	16.3496	17.0588	16.004	17.2426	15.6468	16.5182	17.1023	17.0926	16.5214
1-1_GL0085365;S-Fe10_GL0012304;S-Fe5_GL0040685	15.0933	16.5482	15.1817	17.0868	16.1448	17.0965	14.9334	16.4444	15.2618	15.7453	15.8657	14.8524	16.2973	16.351	16.0271	15.9531	16.512	15.4462	16.1912	14.9325	15.9663	15.8626	16.0395	15.4963
1-1_GL0085365;S-Fe5_GL0040685	14.8053	16.6916	15.3715	16.7203	15.2874	15.7444	14.3343	15.8791	14.7271	15.9008	15.2419	15.2029	14.7884	15.2804	14.7727	15.1617	15.2703	15.1213	15.2613	15.1781	14.454	14.6381	15.237	15.4288
11_GL0086120	NA	NA	NA	NA	12.8277	13.1221	13.1431	NA	NA	11.8791	NA	NA	13.1943	NA	13.8644	12.6426	NA	NA	NA	NA	13.5753	14.3458	13.8089	NA
11_GL0086120;2-1_GL0059318;2-1_GL0063867;5-2_GL0083784;6-6_GL0120740	16.8972	15.3171	15.3188	15.4059	17.7065	16.6813	17.9035	16.7992	17.3262	15.5885	17.1871	18.4225	16.7405	17.6469	17.7092	16.5825	16.7705	16.7252	18.0863	17.7029	18.699	16.8309	16.8039	15.5114
11_GL0086120;6-6_GL0120740	11.3685	10.0649	10.1411	9.37352	11.6238	13.1823	13.0299	11.8379	11.4385	12.1574	NA	12.0292	12.212	11.8011	12.3457	11.7278	10.7338	12.0437	12.1053	12.0795	12.5632	13.8169	12.7147	10.412
11_GL0086269	NA	NA	13.7362	10.7819	13.1459	13.7048	14.1485	13.8426	NA	NA	NA	NA	11.3507	13.4419	12.0269	15.4619	12.855	13.2527	NA	11.9485	11.903	13.0265	15.0953	11.6002
1-1_GL0086568	NA	NA	12.2449	10.8221	NA	12.1833	NA	NA	NA	NA	11.0052	NA	NA	NA	NA	NA	NA	NA	NA	NA	NA	NA	NA	NA
1-1_GL0086568;1-2_GL0114244;17_GL0116041;2-1_GL0052085;2-3_GL0063593;2-4_GL0039211;4-1_GL0043663;7-1_GL0015471;7_GL0063790;MC-6-2_GL0127982	16.8104	16.6233	17.2365	16.5919	17.8944	16.3347	16.8745	17.331	17.4924	17.0126	17.1198	17.5367	18.5019	18.0105	16.2152	17.9751	15.8443	15.1532	15.7226	18.1904	14.7098	17.6022	17.1519	16.6937
1-1_GL0087344;1-3_GL0073849;2-2_GL0076275	NA	NA	NA	10.0915	11.085	NA	11.0206	NA	NA	NA	10.8424	NA	12.4825	11.2752	11.3318	10.6489	NA	NA	11.4473	NA	11.5832	NA	NA	NA
1-1_GL0087344;2-2_GL0076275	NA	NA	NA	NA	11.698	10.8759	NA	NA	NA	NA	NA	NA	12.7604	11.616	12.7548	9.61954	10.5377	NA	NA	NA	11.8011	11.4992	NA	NA
1-1_GL0088844	NA	NA	NA	NA	NA	NA	NA	NA	NA	NA	NA	NA	NA	NA	NA	NA	14.4603	NA	NA	NA	NA	NA	NA	NA
1-1_GL0089280	16.1586	17.568	17.5887	17.5919	15.8503	16.5445	14.1151	17.0494	16.1979	15.7	16.6968	15.4815	15.5007	15.7502	16.7627	16.0295	16.9822	14.7351	16.8917	15.8209	15.7173	17.1687	17.1316	14.6189
1-1_GL0089280;1-8_GL0020049;28_GL0098734;G1-1A_GL0051702;MC-0-1_GL0058729	16.7792	17.955	17.8791	17.8556	16.8054	16.9084	14.9857	16.775	16.3309	14.7976	17.7302	15.5906	17.2412	16.8167	18.4507	15.6617	17.1878	15.5506	17.0381	16.192	16.9504	17.5028	16.8275	14.5078
1-1_GL0089280;28_GL0098734	12.4962	14.9026	14.5537	14.1524	13.1963	13.8321	NA	14.2994	13.1057	9.97204	13.1076	13.8023	13.0579	12.9124	13.5242	NA	12.7893	12.3449	13.7943	11.4273	12.958	14.0377	13.4156	NA
1-1_GL0089286	NA	NA	NA	NA	NA	NA	NA	NA	NA	NA	NA	NA	NA	9.88112	NA	NA	14.0236	12.0464	NA	NA	12.6758	NA	13.9473	NA
1-1_GL0089286;3-3_GL0079932	NA	NA	NA	NA	13.0874	NA	NA	NA	NA	NA	NA	NA	NA	NA	NA	NA	NA	NA	NA	NA	NA	NA	NA	NA
1-1_GL0089286;Group2-6A_GL0064249	NA	NA	NA	NA	NA	NA	NA	13.1534	NA	NA	NA	NA	13.5581	NA	NA	NA	NA	NA	NA	NA	13.5628	14.4405	NA	NA
1-1_GL0089402	NA	NA	NA	NA	12.7442	NA	13.0953	12.3269	13.0312	NA	NA	13.2206	13.224	12.8611	13.711	13.0536	12.4725	11.8536	NA	12.116	12.9443	NA	12.7507	13.4719
1-1_GL0089402;1A-dyr4-07_GL0100089;2-1_GL0019334;5-2_GL0033754	16.6797	15.253	15.4764	14.762	17.6408	16.8795	17.7538	16.5222	17.0098	15.7121	16.3391	11.5095	17.2464	17.7019	17.7592	16.1972	16.831	17.1138	16.8176	17.5447	17.064	16.0062	15.857	15.8764
1-1_GL0089402;2-1_GL0019334;23_GL0125801;5-2_GL0033754	15.1735	13.3278	15.0621	14.7641	16.3753	15.4098	16.827	16.6022	16.1083	16.2015	14.9424	15.8126	14.9902	16.7113	15.5413	16.2218	16.1293	16.557	15.5794	16.0288	16.3721	15.6213	16.313	16.8791
1-1_GL0089402;2-1_GL0019334;5-2_GL0033754	16.274	15.3055	15.7423	15.4802	17.4476	16.5084	17.1078	16.1688	16.3936	15.6867	15.7431	16.222	16.8855	17.3713	17.3902	16.9743	15.9915	16.3773	15.8569	16.3735	16.6332	15.6093	15.1055	16.1946
11_GL0090262	NA	NA	12.7393	NA	13.5061	13.6063	14.4984	13.804	NA	NA	11.9223	10.8872	12.8797	13.6944	12.95	14.3832	NA	12.9	11.892	12.8289	13.0291	14.3137	14.5152	NA
11_GL0090262;1A-dyr5-06_GL0025300;2-3_GL0091942;3-4_GL0031004;5-8_GL0077176;5-8_GL0150376;6-4_GL0100149;6-5_GL0067061;Group2-3A_GL0191651;Group2-8A_GL0039054;MC-0-1_GL0005167;MH-6-3_GL0063170;MH-6-4_GL0154984;S-Fe12_GL0093100;S-Fe20_GL0105983;S-Fe2_GL0058673;S-Fe9_GL0276065	18.3334	17.0276	17.1429	17.4376	18.8833	18.9825	19.602	18.922	18.7794	17.0044	18.7613	17.8969	19.2936	18.9496	19.7022	17.432	18.1195	18.5472	19.5552	18.495	18.8172	19.4541	17.7862	17.0915
1-1_GL0090503	NA	12.7886	11.0163	12.5484	11.1495	12.4284	12.5942	13.1737	10.9254	NA	NA	NA	11.0865	11.2515	12.1389	NA	11.1852	NA	NA	NA	13.9245	NA	NA	NA
1-1_GL0090503;1-7_GL0003362	NA	12.426	10.8058	13.0717	NA	14.1206	15.1172	13.2425	NA	NA	NA	NA	11.7802	NA	11.7916	NA	NA	NA	NA	11.1398	13.706	NA	NA	NA
1-1_GL0090503;G1-5A_GL0188387	NA	13.2237	12.3274	13.3813	NA	14.5759	13.8903	14.3576	NA	NA	NA	11.1804	11.5522	12.5948	13.5835	NA	13.0325	NA	13.0751	NA	13.6774	NA	NA	NA
1-1_GL0091386;10_GL0059712;34_GL0065270	13.4418	12.9252	11.2309	13.6752	11.1407	NA	11.8163	NA	NA	NA	13.8004	12.7411	12.1973	11.1873	12.9481	13.0515	10.9618	11.8324	11.7637	12.8597	13.0163	NA	NA	11.1346
1-1_GL0091386;1-1_GL0111812;1-1_GL0124360;1-1_GL0151501;1-2_GL0040405;10_GL0059712;11_GL0011325;11_GL0026527;14_GL0001317;17_GL0139147;1A-dyr2-07_GL0001224;1A-dyr2-07_GL0030054;1A-dyr2-07_GL0077153;1A-dyr4-07_GL0048160;1A-dyr4-07_GL0061974;2-1_GL0030314;2-1_GL0097897;2-2_GL0056977;2-2_GL0089550;20_GL0005185;20_GL0012397;20_GL0175919;26_GL0076787;26_GL0097174;2_GL0001740;3-2_GL0067552;34_GL0065270…	17.6786	16.847	16.9317	17.2508	18.9747	18.2678	19.3116	17.258	17.76	16.1471	18.1567	17.5891	19.0147	19.0016	15.6296	17.6198	17.9902	17.2469	18.9673	18.4313	18.7438	18.1884	17.4719	17.5882
1-1_GL0091386;1-1_GL0111812;1-1_GL0124360;1-1_GL0151501;1-2_GL0040405;10_GL0059712;11_GL0011325;11_GL0026527;14_GL0001317;17_GL0139147;1A-dyr2-07_GL0001224;1A-dyr4-07_GL0048160;1A-dyr4-07_GL0061974;2-1_GL0030314;2-1_GL0097897;2-2_GL0056977;2-2_GL0089550;20_GL0005185;20_GL0012397;20_GL0175919;26_GL0076787;26_GL0097174;2_GL0001740;3-2_GL0067552;34_GL0065270;4-3_GL0034632;4-4_GL0022591;5-2_GL0102417…	18.0701	17.0332	16.9689	17.057	18.8273	18.0887	19.1695	18.5783	17.9781	16.1142	18.4779	18.3769	19.0119	18.9435	19.1928	17.0961	17.8822	17.9236	19.1609	18.7537	18.5924	18.6549	17.1728	17.0649
1-1_GL0091386;1-1_GL0111812;1-2_GL0040405;11_GL0011325;11_GL0026527;17_GL0139147;1A-dyr2-07_GL0001224;1A-dyr2-07_GL0030054;1A-dyr2-07_GL0077153;1A-dyr4-07_GL0048160;1A-dyr4-07_GL0061974;2-1_GL0030314;2-2_GL0089550;20_GL0005185;20_GL0012397;20_GL0175919;2_GL0001740;34_GL0065270;4-2_GL0041327;4-3_GL0001567;4-4_GL0022591;5-1_GL0073769;5-2_GL0102417;6-3_GL0065476;6-7_GL0026521;7-1_GL0009368;8-1_GL007…	NA	NA	NA	NA	10.7214	11.8745	NA	11.8285	NA	NA	NA	NA	NA	10.605	11.7248	NA	10.1316	NA	11.1263	NA	NA	NA	NA	NA
1-1_GL0091386;1-1_GL0111812;34_GL0065270	NA	NA	NA	NA	NA	12.6934	NA	NA	NA	NA	NA	NA	NA	12.0436	13.2974	NA	NA	NA	NA	NA	NA	NA	NA	NA
1-1_GL0091390	13.6891	13.8233	13.8588	13.8319	13.4621	14.6545	11.3924	13.1728	14.0748	NA	14.251	13.2914	NA	13.1595	13.7467	13.7622	14.2023	14.2449	15.2841	13.7391	14.9412	12.0748	NA	12.927
1-1_GL0091390;2-2_GL0107972	NA	12.3535	11.4179	10.8437	11.3992	13.8083	13.9921	NA	NA	11.0717	11.3722	NA	NA	11.9292	13.8071	12.0907	NA	13.4405	13.2601	12.9897	NA	11.9898	NA	11.9738
1-1_GL0091513	15.4377	16.9253	16.0368	16.7082	15.0761	13.5925	12.4674	13.4567	13.7902	11.2967	15.953	11.287	16.12	15.2254	16.2501	13.5848	14.3026	12.7898	15.7393	14.8964	15.4137	15.8796	14.2807	11.7645
1-1_GL0091513;11_GL0002095;14_GL0090199;1B-dyr12-07_GL0023314;37_GL0016532;MC-0-1_GL0022870;MC-6-3_GL0041016;MH-0-3_GL0068860;S-Fe10_GL0056937;S-Fe10_GL0099296;S-Fe10_GL0134058;S-Fe10_GL0143701;S-Fe11_GL0043926;S-Fe12_GL0013137;S-Fe13_GL0093499	13.483	15.7214	14.7944	14.296	13.9524	13.7432	NA	NA	NA	12.2811	13.5191	NA	14.3919	13.5366	14.9552	11.9018	12.734	11.648	15.0924	11.9091	NA	14.7525	NA	11.1606
1-1_GL0091513;1B-dyr12-07_GL0023314;37_GL0016532;MC-0-1_GL0022870;MC-6-3_GL0041016;MH-0-3_GL0068860;S-Fe10_GL0056937;S-Fe10_GL0099296;S-Fe10_GL0143701;S-Fe12_GL0013137;S-Fe13_GL0093499	16.3871	14.8954	18.1767	17.4242	16.1303	14.7131	13.7925	14.3393	14.916	13.2271	17.2978	14.3614	16.4421	16.3309	17.4287	14.0232	15.3752	13.9186	17.5876	15.5675	16.45	17.0649	14.75	12.282
1-1_GL0091513;1B-dyr12-07_GL0023314;MC-0-1_GL0022870;MH-0-3_GL0068860;S-Fe10_GL0099296;S-Fe10_GL0143701	16.2821	18.2485	17.6328	17.8369	16.272	16.0079	13.8164	15.682	15.0543	13.3511	16.9593	14.774	17.7528	16.5114	16.9595	15.033	16.0316	14.7912	17.1325	15.8715	17.3757	17.4159	15.3566	13.2334
1-1_GL0091513;1B-dyr12-07_GL0023314;MC-6-3_GL0041016;S-Fe12_GL0013137;S-Fe13_GL0093499	14.2905	16.0881	15.8059	16.0096	14.6537	14.372	12.7452	13.3814	13.2227	NA	15.6966	12.0146	15.4439	14.844	15.668	12.4798	14.5524	12.0738	16.3304	14.4546	15.4454	16.3511	13.1348	10.2766
1-1_GL0091513;40_GL0047200	NA	NA	NA	NA	11.1786	NA	NA	NA	NA	NA	NA	NA	NA	11.0017	11.7332	NA	NA	NA	NA	NA	NA	NA	NA	NA
1-1_GL0091513;S-Fe10_GL0143701	NA	NA	NA	NA	NA	NA	NA	NA	NA	NA	NA	NA	NA	NA	13.9594	NA	NA	NA	NA	NA	NA	NA	NA	NA
1-1_GL0091513;S-Fe12_GL0013137	NA	NA	NA	NA	NA	NA	NA	NA	NA	NA	NA	NA	NA	NA	NA	NA	NA	NA	9.89631	NA	NA	NA	NA	NA
1-1_GL0091757	NA	NA	NA	NA	NA	NA	NA	NA	NA	NA	NA	NA	NA	NA	NA	NA	10.9627	NA	NA	NA	10.9987	NA	NA	NA
1-1_GL0091757;4-1_GL0026029	10.8636	NA	12.4347	NA	13.5211	NA	NA	NA	NA	NA	NA	NA	13.3146	NA	13.7285	NA	NA	NA	13.0388	NA	11.6035	NA	NA	NA
1-1_GL0091838;11_GL0146124;38_GL0076358;MC-0-1_GL0035093;MH-0-5_GL0017450	13.5279	13.1931	12.4217	14.4081	14.2851	14.886	13.8235	14.2289	13.8501	12.5853	14.1376	14.0128	15.8802	14.6087	14.7884	13.6845	14.0982	14.071	14.5063	13.6289	14.9759	15.5139	13.3708	11.1937
1-1_GL0091838;11_GL0146124;38_GL0076358;MH-0-5_GL0017450	13.4466	13.825	12.2965	13.5172	14.0013	14.1802	NA	13.3747	13.0729	11.2785	13.9895	12.1396	14.7478	14.1182	14.2866	13.5553	NA	12.1714	NA	14.1547	14.1537	14.0636	NA	12.1681
1-1_GL0091838;1-2_GL0032701;1-4_GL0024956;1-4_GL0028900;MC-0-1_GL0028363;MC-0-3_GL0014688	NA	NA	NA	NA	12.9049	12.6524	NA	11.9927	12.006	NA	NA	NA	14.0021	12.2373	13.2698	11.2456	NA	12.2173	12.6354	NA	12.6964	NA	NA	NA
1-1_GL0091838;1-4_GL0024956;1-4_GL0028900;11_GL0146124;23_GL0105051;38_GL0076358;5-6_GL0079744;5-7_GL0064926;7-5_GL0106407;MC-0-1_GL0028363;MC-0-1_GL0035093;MC-0-3_GL0014688;MC-6-4_GL0069182	14.5004	14.347	14.3514	15.2016	16.2936	16.349	16.1225	15.6052	14.8793	13.3401	14.0816	14.3839	17.5151	16.5892	17.2737	15.3387	15.5781	14.5938	16.5912	15.0735	16.2435	16.5316	14.2964	14.5624
1-1_GL0092522	11.2009	12.4928	12.448	12.7634	13.2145	12.8337	10.783	12.2461	12.9747	11.3428	12.4388	11.9589	11.6887	12.7867	12.3616	13.3253	12.5571	13.0461	13.607	12.7302	13.6824	NA	NA	12.7005
1-1_GL0092522;1A-dyr4-07_GL0009722;4-4_GL0083540;5-6_GL0015745;6-5_GL0072187;7-5_GL0167262;G1-1A_GL0021347;S-Fe20_GL0104993	NA	NA	NA	NA	15.8604	15.4877	15.8751	15.2079	15.3708	NA	NA	14.8102	16.8459	16.1153	15.8646	NA	15.6598	15.2353	15.401	NA	16.3605	NA	14.7132	15.6629
1-1_GL0092522;2-3_GL0002598;2-3_GL0015512;3-5_GL0005950;5-6_GL0015745;7-8_GL0106456;8-4_GL0056649;G1-1A_GL0021347;G1-5A_GL0103365;Group2-8A_GL0153883;MC-6-2_GL0001188;S-Fe9_GL0255628	17.7271	16.6571	17.3901	16.6199	19.0851	18.1125	18.8859	17.4791	17.4629	16.6413	16.9699	18.2377	18.7117	19.1243	19.2384	18.1067	17.5911	18.141	18.339	18.512	18.6586	17.4465	17.4276	16.8211
1-1_GL0092531	NA	NA	NA	NA	NA	11.9765	NA	NA	NA	NA	NA	NA	NA	NA	NA	NA	NA	NA	NA	NA	NA	NA	NA	NA
1-1_GL0093040	NA	NA	NA	NA	14.2423	14.2845	14.625	13.3084	12.8365	12.2755	12.9141	13.1399	13.8042	14.4968	NA	13.0077	11.3705	NA	NA	13.9842	13.8333	NA	12.819	NA
11_GL0093118	NA	NA	15.0118	14.0984	15.1343	15.3392	15.854	14.1062	13.8486	NA	NA	NA	NA	15.361	14.259	16.3227	13.7229	13.8021	14.5771	14.6648	14.9084	14.982	15.8104	14.167
1-1_GL0093225	11.2668	14.0648	12.6146	13.6003	NA	12.0452	NA	12.6444	NA	NA	13.1736	11.1011	12.5315	11.9885	12.3312	NA	12.7659	NA	13.8208	12.0724	12.2616	14.0946	12.5207	NA
1-1_GL0093572	16.5635	15.8664	16.2896	14.1229	14.2182	12.8658	12.3639	12.5758	13.9788	12.7742	15.1661	12.9724	13.9476	14.2514	14.4434	12.8587	12.6247	12.782	14.3349	13.9307	13.3102	15.6776	15.6517	12.1782
1-1_GL0093572;MC-6-1_GL0083294	12.2312	NA	NA	NA	NA	NA	NA	12.2961	NA	NA	NA	NA	NA	NA	NA	NA	NA	NA	NA	NA	NA	NA	NA	NA
1-1_GL0093572;MC-6-1_GL0083294;MC-6-2_GL0180851	17.0482	17.3835	17.4903	16.2804	15.7002	15.6059	15.1624	16.7087	14.7379	15.3619	16.1233	15.3262	NA	15.7742	15.4377	14.5868	15.7287	15.144	15.7332	15.5135	14.8217	15.5056	15.792	14.5482
1-1_GL0093739	15.0837	12.7321	14.9923	13.1705	16.1466	15.1024	17.0473	13.4638	15.3983	15.729	14.8205	15.73	16.117	16.1254	15.6258	15.1558	15.621	15.958	15.0371	14.8455	16.084	11.367	15.0723	16.1309
1-1_GL0093801	11.6005	11.7404	NA	12.2223	14.1108	14.7293	13.9823	13.309	13.8299	NA	12.1021	NA	14.5477	14.098	13.8337	13.7778	12.0116	11.7433	13.7736	NA	14.7039	15.7889	NA	NA
1-1_GL0093801;2-3_GL0098550;3-7_GL0044062;5-8_GL0038230;MH-6-5_GL0035055;S-Fe8_GL0284158;S-Fe9_GL0112465	NA	NA	9.35011	10.8506	12.7294	13.9283	12.6196	NA	12.1617	11.3574	12.0493	NA	13.957	12.3785	13.6573	NA	13.1175	12.1856	13.8376	11.017	12.7294	13.6452	NA	11.3687
1-1_GL0093801;3-7_GL0044062	NA	NA	NA	11.1977	11.7127	13.9305	11.8682	NA	NA	NA	NA	NA	12.9834	12.5962	12.4671	NA	12.2048	NA	12.6428	NA	12.1849	13.0316	NA	NA
1-1_GL0093801;5-8_GL0038230;MH-6-3_GL0111643;S-Fe8_GL0284158	NA	NA	NA	NA	13.8892	14.3592	13.9607	12.7163	13.3928	NA	NA	NA	14.91	14.2973	13.5385	12.4884	13.2908	12.4664	14.323	12.2409	14.2417	14.3125	12.6962	NA
1-1_GL0093801;MH-6-3_GL0111643	12.7842	12.4194	NA	11.839	14.5718	14.7728	14.8948	13.7998	13.8724	NA	12.9953	11.9701	13.6869	14.6685	14.0684	NA	11.8595	12.4813	14.7122	13.0044	15.1135	14.8846	NA	NA
1-1_GL0093937;1-2_GL0084271;S-Fe10_GL0020184;S-Fe12_GL0037999	NA	NA	NA	NA	NA	NA	NA	13.262	NA	NA	NA	NA	16.2599	NA	NA	12.4196	14.5417	14.4847	NA	NA	13.6326	14.1432	15.0965	14.6664
1-1_GL0093937;7-7_GL0086641;S-Fe10_GL0020184;S-Fe12_GL0037999	NA	NA	11.6058	NA	13.1133	NA	NA	NA	NA	NA	NA	13.2238	NA	12.8226	NA	13.6034	14.7248	12.4514	NA	NA	13.3115	13.1041	12.9782	13.3829
1-1_GL0093937;S-Fe12_GL0037999	NA	NA	NA	NA	NA	NA	NA	NA	NA	NA	NA	13.6761	NA	NA	NA	NA	13.9249	NA	NA	NA	NA	15.1736	NA	NA
1-1_GL0094467	13.3845	13.6862	13.275	13.1114	13.755	13.8487	14.1796	14.0156	13.9036	13.6993	13.2413	13.6359	12.9221	13.7382	12.6671	11.8975	14.1573	14.1906	13.521	13.6981	13.4523	11.9433	13.3769	13.4734
1-1_GL0094467;2-3_GL0037931;3-5_GL0118285;6-2_GL0044239	NA	NA	NA	NA	NA	NA	NA	NA	13.1393	NA	NA	NA	NA	NA	NA	NA	NA	NA	NA	NA	NA	NA	NA	NA
1-1_GL0094651	NA	NA	NA	NA	NA	NA	NA	NA	11.1468	NA	NA	11.0893	12.2414	NA	10.9499	NA	NA	NA	11.4383	NA	11.8663	NA	NA	NA
1-1_GL0094844	NA	NA	NA	9.80614	11.3141	11.1281	NA	10.5872	NA	NA	NA	NA	11.3901	11.3398	10.4893	10.0236	NA	NA	NA	NA	11.617	11.5258	NA	NA
1-1_GL0094844;17_GL0102395;47_GL0084449;7-8_GL0159691;S-Fe20_GL0010689	11.9208	NA	NA	NA	NA	NA	NA	NA	NA	NA	NA	NA	NA	NA	NA	NA	NA	NA	NA	NA	NA	NA	NA	NA
1-1_GL0095104	14.4732	14.2658	18.597	17.9975	15.2684	16.6348	20.2687	15.9489	17.3183	14.3724	14.2354	17.836	16.7199	15.137	17.3807	13.8481	17.9109	18.717	18.4954	18.0332	19.8327	NA	18.3491	18.4269
1-1_GL0095104;1-1_GL0128445;1-3_GL0102532;29_GL0067888;MH-6-5_GL0183530	18.0441	17.6367	18.5713	18.2358	18.5778	18.6368	19.2768	15.7416	18.0838	16.7641	18.4349	17.7094	19.6768	18.7293	18.9438	18.0367	18.1169	18.6914	18.5876	17.5582	19.6274	16.3588	18.4063	18.4169
1-1_GL0095104;17_GL0105836;22_GL0076169;5-8_GL0139456	NA	14.3735	15.1307	14.4873	15.9887	NA	NA	NA	NA	14.7274	NA	NA	NA	15.8371	NA	15.5991	15.5683	15.9898	NA	NA	NA	NA	NA	14.8317
1-1_GL0095104;17_GL0160550;4-2_GL0053150;8-5_GL0071861;MH-6-3_GL0042795;MH-6-5_GL0183530;S-Fe2_GL0195698	15.1542	13.9045	12.9429	15.7865	16.4587	14.4564	17.2172	14.9707	15.1151	15.3212	15.7885	15.523	16.5396	16.5304	16.1302	16.4077	15.8744	15.7352	16.0792	15.3898	16.1	15.0625	16.1466	16.36
1-1_GL0095104;22_GL0076169;5-8_GL0139456	15.0534	NA	14.8797	15.2219	15.272	13.4411	17.0079	NA	14.6396	14.0173	NA	14.8474	15.0259	14.7755	16.8019	NA	15.6094	16.2933	15.6284	15.8872	16.6112	NA	16.4311	16.0668
1-1_GL0095104;5-8_GL0139456	13.6022	NA	12.6275	13.9098	11.463	12.5211	15.8019	11.7126	13.4207	12.7334	10.8312	12.8948	NA	NA	14.2161	NA	13.8241	14.0442	13.9071	13.2288	15.2327	NA	13.4065	14.6321
1-1_GL0095242	16.4226	16.9229	16.7192	16.5286	14.9101	15.5237	13.4938	14.2271	14.4933	12.3628	16.8112	11.9708	15.8218	15.4651	16.4459	13.5822	15.3674	13.1989	16.7843	15.0685	14.7878	15.7101	15.6492	11.5199
1-1_GL0095657	13.1618	14.6582	17.0629	12.8115	15.9485	15.2348	NA	14.3894	15.7745	13.719	16.0946	13.4329	14.9669	15.546	15.1613	NA	17.9956	15.5909	17.451	15.5145	15.7492	NA	12.6533	16.4015
11_GL0095758	15.4296	16.5018	14.589	14.5635	12.302	11.2664	12.3057	14.6944	11.856	10.6142	14.8732	15.2713	13.6353	11.6769	12.6158	13.6847	13.4718	12.5581	14.1724	14.1805	13.2433	12.9098	14.2864	13.6814
11_GL0095758;11_GL0109255	11.6271	11.876	NA	10.7404	NA	NA	NA	11.7994	10.2274	NA	10.8732	11.3188	10.4903	NA	NA	NA	11.5791	NA	NA	NA	NA	NA	11.0325	NA
11_GL0095770	15.5474	16.438	14.7053	14.6332	NA	12.2733	12.8252	14.9776	12.7183	11.8644	14.9792	15.493	13.965	12.5229	13.1839	13.8137	13.5677	13.0466	14.0784	14.5669	13.2388	13.5014	14.7183	14.2031
11_GL0095772	15.2281	15.4988	13.7755	14.4357	NA	11.6446	12.4246	14.3064	11.3303	10.8264	14.6989	14.976	13.5224	NA	NA	13.7922	12.8758	12.1095	13.7296	14.5409	13.0139	13.3981	14.6532	13.9702
11_GL0096011	14.4878	13.4209	14.0686	14.1102	16.1143	15.6343	17.0292	15.6638	15.3052	14.4866	14.5074	13.5826	15.2835	16.2034	15.4692	16.8318	15.0912	15.5409	15.0951	15.0144	15.6167	16.2439	16.4724	15.1759
11_GL0096011;2-1_GL0072207;2-1_GL0097178;2-3_GL0000992;5-1_GL0024858	17.1028	NA	14.4728	14.7825	17.161	NA	17.9919	NA	16.9263	NA	15.7244	NA	NA	17.1943	17.2404	16.4932	16.4184	NA	16.9576	17.4754	NA	NA	NA	15.2247
11_GL0096011;5-1_GL0024858	NA	NA	NA	NA	13.2172	13.5291	13.8608	12.1317	NA	NA	NA	NA	12.8143	13.5223	NA	11.9481	12.2702	NA	14.2431	NA	NA	12.9611	NA	NA
11_GL0096011;6-4_GL0000206;6-4_GL0052057;7-8_GL0136525;8-1_GL0042641	NA	NA	NA	NA	NA	NA	NA	NA	NA	NA	NA	NA	NA	NA	12.1052	NA	11.387	NA	NA	NA	NA	NA	NA	NA
1-1_GL0096134;10_GL0063529	NA	NA	12.6776	NA	13.7503	14.2125	NA	13.9922	14.7576	12.2673	12.7995	NA	12.9149	13.6746	12.4079	NA	16.0131	13.7937	14.3646	11.7212	13.1529	NA	NA	13.3094
1-1_GL0096137	NA	14.5463	14.5299	14.9304	14.1528	14.983	13.0995	15.3809	15.9917	14.3151	13.9215	13.1454	NA	14.2754	14.0895	14.5718	16.1788	15.4152	15.2333	13.4951	14.8619	14.756	NA	14.0143
11_GL0096306	12.0313	NA	12.354	11.6774	12.0258	12.1871	13.3833	12.6726	12.4041	10.352	10.7291	NA	NA	12.1714	11.2503	13.2719	12.1142	12.5259	12.1357	12.7528	10.9397	12.4475	13.7337	11.9865
11_GL0096306;1_GL0086842;2-1_GL0103739;2-5_GL0069395;3-5_GL0040884;4-1_GL0068194;5-3_GL0111435;5-5_GL0069737;6-1_GL0096272;6-2_GL0036741;7-8_GL0033212;G1-1A_GL0051997;S-Fe12_GL0080717	16.7458	13.5351	13.2922	13.8024	15.0039	14.9427	15.9268	NA	NA	13.8158	15.4178	NA	15.2045	15.0735	14.9312	14.3649	13.0846	14.7181	14.6549	15.4526	NA	13.3212	13.9219	13.9188
11_GL0096306;1_GL0086842;2-1_GL0103739;2-5_GL0069395;3-5_GL0040884;4-1_GL0068194;5-3_GL0111435;5-5_GL0069737;6-1_GL0096272;6-2_GL0036741;G1-1A_GL0051997;S-Fe12_GL0080717	17.0151	NA	NA	13.8086	15.8607	15.493	16.6335	15.4707	14.9233	NA	15.6698	15.9635	15.3519	15.8946	15.4981	15.2752	14.8758	14.9063	16.0058	16.7361	15.9368	15.4173	15.1492	15.048
11_GL0096306;4-1_GL0068194;6-1_GL0096272	NA	NA	13.0164	NA	12.6649	13.0254	14.077	13.3546	NA	NA	11.133	NA	12.1367	12.7935	14.2901	15.06	NA	12.794	NA	12.3012	NA	NA	14.0973	10.8922
11_GL0096694;2-2_GL0089525;5-2_GL0027202;G1-5A_GL0015726;Group2-3A_GL0057192	NA	NA	NA	NA	NA	11.7369	NA	11.2339	12.2653	NA	NA	NA	NA	NA	NA	NA	NA	NA	11.8094	NA	NA	12.9261	NA	NA
11_GL0096694;5-2_GL0027202;G1-5A_GL0015726	13.327	12.8316	12.3139	11.8681	12.3949	13.9201	NA	NA	12.1296	12.3554	12.7228	NA	NA	12.8207	NA	14.2687	11.0036	NA	12.9792	NA	NA	15.4208	13.595	NA
11_GL0096768;11_GL0136132	NA	NA	NA	NA	NA	15.2817	15.7155	15.6048	NA	NA	NA	NA	13.2223	14.6613	NA	15.5018	NA	NA	NA	NA	15.1087	NA	16.4661	NA
11_GL0096768;11_GL0136132;2A-dyr14-07_GL0018422;4-5_GL0109726;4-6_GL0053848	NA	NA	NA	12.3131	15.1186	14.8373	16.0477	15.9168	NA	NA	NA	NA	13.6007	15.1814	13.8709	13.4921	14.7666	14.0222	12.0901	13.7409	14.9547	13.0962	NA	12.8024
1-1_GL0097306	14.1483	15.8827	14.6722	15.3161	14.3104	13.9343	11.66	13.5579	13.9749	NA	14.9838	13.3488	14.9605	14.225	14.9423	12.7242	13.8995	12.0138	15.4899	14.318	14.481	15.7055	13.9897	NA
1-1_GL0097306;MC-6-2_GL0121460;MC-6-3_GL0067685	15.232	16.0556	15.967	15.7606	14.4687	13.9853	13.156	13.9327	13.6003	12.2741	15.688	13.361	15.0996	14.7108	14.9288	13.6335	14.714	12.6812	15.505	14.2662	15.0225	15.0748	13.7977	12.2936
1-1_GL0097453	14.489	15.7528	15.4502	15.3171	15.4089	16.5889	11.5954	15.7872	17.2625	15.1292	15.4365	12.939	15.08	15.1965	14.4186	15.2592	17.0038	16.369	16.663	14.5343	15.7003	NA	12.9705	15.5377
1-1_GL0097533	NA	NA	12.9093	NA	13.6746	14.3161	11.7065	13.0584	13.9594	NA	12.765	11.5959	14.5097	13.8631	11.9368	10.3271	13.955	13.4137	14.2189	11.8561	13.8152	NA	12.5262	12.1523
1-1_GL0097533;1-1_GL0138491;1-2_GL0056317;10_GL0025698;2-2_GL0154178;2-3_GL0004587;2-3_GL0071040;3-1_GL0054518;4-1_GL0068204;5-5_GL0053324;54_GL0082039;6-1_GL0025244;7-1_GL0047885;7_GL0094385;G1-1A_GL0023674;MC-6-2_GL0078340;MC-6-2_GL0178191	NA	NA	NA	NA	NA	NA	NA	12.3935	NA	NA	NA	12.2663	NA	NA	NA	NA	NA	NA	NA	NA	NA	NA	NA	NA
1-1_GL0097533;1-1_GL0138491;1-2_GL0106369;10_GL0025698;2-1_GL0068363;2-2_GL0154178;2-3_GL0004587;3-1_GL0054518;4-1_GL0033909;5-8_GL0102626;54_GL0082039;6-1_GL0025244;G1-1A_GL0023674	14.2748	NA	13.0502	NA	14.7199	13.6761	14.163	12.5949	13.0864	11.7526	13.4692	13.8432	14.9282	14.7804	14.5847	12.3969	13.0521	13.691	14.0021	14.851	13.9665	12.5621	11.442	12.6467
1-1_GL0097533;1-2_GL0056317;5-8_GL0063331;7_GL0094385;G1-1A_GL0023674	15.1638	14.744	14.7525	14.3541	16.637	15.3413	15.4326	14.9209	15.7121	15.4261	15.7797	14.8652	16.9638	16.7548	14.1832	14.9029	15.9317	15.3324	17.5016	16.0091	16.7002	15.5638	15.1197	NA
1-1_GL0097533;1-2_GL0106369	NA	10.623	11.89	NA	12.1548	13.033	NA	NA	11.3588	NA	NA	10.8706	11.2865	12.2108	12.6001	12.335	12.9693	12.3099	13.0971	NA	13.0839	NA	NA	11.5992
1-1_GL0097533;1-2_GL0106369;10_GL0025698;4-2_GL0043523;5-8_GL0102626;G1-1A_GL0023674;G1-5A_GL0104085;MC-6-2_GL0178191	12.3809	12.0518	12.5779	11.4754	14.0451	14.0204	13.6148	12.4119	13.963	NA	14.3041	12.9075	14.1821	14.3516	15.0151	13.2068	13.4341	13.5892	15.418	12.888	15.2592	12.2074	12.4142	12.3952
1-1_GL0097533;1-2_GL0106369;10_GL0025698;4-2_GL0043523;G1-1A_GL0023674;G1-5A_GL0104085	14.6647	15.0198	15.4997	15.5604	17.3878	16.5687	15.8779	15.1945	16.4578	15.2273	16.4205	15.4018	17.7081	17.3607	16.4704	15.9623	16.5695	16.4702	17.794	16.3325	17.5642	15.5283	16.2669	15.6815
1-1_GL0097533;1-2_GL0106369;10_GL0025698;7_GL0094385;G1-1A_GL0023674	15.9309	NA	16.6677	NA	17.7368	18.0451	NA	NA	17.7594	15.6078	16.0112	NA	18.0047	17.6828	16.7251	16.5524	17.2484	17.2543	17.4923	16.4489	18.3702	NA	NA	15.5662
1-1_GL0097533;1-2_GL0106369;7_GL0094385;G1-1A_GL0023674	12.763	13.8748	14.2064	14.8676	15.4546	16.3053	15.5145	14.6753	15.2757	12.7973	NA	14.2345	15.039	15.6494	14.762	14.2881	15.4914	13.6349	15.7565	13.16	16.7117	12.1862	NA	14.16
1-1_GL0097553;1-1_GL0141160;1-8_GL0113440;10_GL0020849;10_GL0025680;10_GL0038427;11_GL0009244;11_GL0048494;11_GL0062137;11_GL0121666;11_GL0142670;11_GL0147059;17_GL0085783;1A-dyr2-07_GL0016474;1A-dyr4-07_GL0054274;2-1_GL0068373;2-1_GL0095018;2-1_GL0103738;2-7_GL0090840;2-8_GL0093980;20_GL0036609;20_GL0040300;20_GL0119273;22_GL0069193;26_GL0103357;29_GL0059643;3-6_GL0057763;34_GL0077571;35_GL00408…	17.1441	15.8134	15.6389	16.2294	18.1283	17.5741	17.7588	17.1792	17.922	16.4098	17.0694	17.0316	18.1114	18.2318	13.1605	17.2569	17.3547	16.7061	17.684	17.8682	17.8427	17.5469	16.8018	16.5322
1-1_GL0097553;1-1_GL0141160;1-8_GL0113440;10_GL0020849;10_GL0025680;10_GL0038427;11_GL0048494;11_GL0062137;11_GL0121666;11_GL0142670;11_GL0147059;1A-dyr4-07_GL0054274;2-1_GL0068373;2-1_GL0095018;2-1_GL0103738;2-8_GL0093980;29_GL0059643;3-6_GL0057763;34_GL0077571;35_GL0040849;4-1_GL0045516;7-4_GL0033315;7-6_GL0012399;G1-1A_GL0023663;G1-1A_GL0065512;G1-5A_GL0050443;G1-7A_GL0058707;Group2-3A_GL01336…	NA	NA	NA	NA	NA	12.078	11.8643	NA	NA	NA	NA	NA	11.4822	NA	NA	NA	NA	NA	11.8185	NA	11.3356	11.5022	NA	10.0791
1-1_GL0097553;1-1_GL0141160;1-8_GL0113440;10_GL0020849;10_GL0025680;10_GL0038427;11_GL0048494;11_GL0062137;11_GL0121666;11_GL0142670;11_GL0147059;1A-dyr4-07_GL0054274;2-1_GL0068373;2-1_GL0095018;2-1_GL0103738;2-8_GL0093980;29_GL0059643;3-6_GL0057763;3-8_GL0006308;34_GL0077571;35_GL0040849;4-1_GL0045516;7-4_GL0033315;7-6_GL0012399;G1-1A_GL0023663;G1-1A_GL0065512;G1-5A_GL0050443;G1-7A_GL0058707;Gro…	15.6481	13.7011	NA	14.1689	16.175	14.7014	15.6942	15.1387	15.682	14.7961	15.4772	15.4037	15.6844	16.1915	15.6223	15.834	NA	15.8531	15.9875	16.5462	15.9183	15.1009	13.4064	NA
1-1_GL0097553;1-8_GL0113440;10_GL0020849;10_GL0025680;11_GL0121666;11_GL0142670;1A-dyr4-07_GL0054274;29_GL0059643;3-6_GL0057763;3-8_GL0006308;34_GL0077571;35_GL0040849;4-1_GL0045516;7-6_GL0012399;G1-1A_GL0023663;G1-1A_GL0065512;G1-5A_GL0050443;G1-7A_GL0058707;Group2-3A_GL0133614;Group2-8A_GL0084398;Group2-8A_GL0131983	14.4784	14.1312	12.792	13.7113	15.7315	15.8304	14.4468	14.7332	15.2766	14.5549	13.9563	12.8424	16.1217	15.4563	14.746	15.1967	14.4066	14.1259	15.3311	14.1257	15.6281	16.1151	14.7442	13.0939
11_GL0098946	NA	NA	NA	NA	NA	NA	NA	NA	NA	NA	NA	NA	NA	NA	10.9834	NA	NA	NA	NA	NA	NA	NA	NA	NA
1-1_GL0099353	NA	11.3587	9.33242	11.9883	NA	NA	NA	NA	NA	NA	NA	NA	NA	NA	11.4719	10.7976	NA	10.0098	NA	NA	11.2394	NA	NA	NA
1-1_GL0100030	NA	NA	NA	NA	15.6179	NA	NA	NA	NA	NA	NA	NA	14.2103	15.5244	NA	16.1924	NA	NA	NA	NA	NA	15.1548	15.3568	NA
1-1_GL0100152	13.9185	15.3284	15.6379	15.2618	12.8077	14.171	13.1054	14.9542	14.149	14.9966	16.3271	15.4051	NA	13.2263	NA	NA	15.2382	14.5992	15.6388	13.7494	NA	NA	NA	NA
11_GL0100278	16.6455	16.6551	16.2948	15.5791	13.7762	14.4642	13.455	15.3816	15.2187	15.5796	15.5608	15.9029	13.6273	13.8465	13.6403	14.8377	15.5023	13.9723	14.1937	15.7407	13.1571	14.2879	14.1885	14.8676
1-1_GL0101353	NA	NA	NA	NA	NA	NA	NA	NA	NA	NA	NA	NA	NA	12.2671	NA	NA	15.8243	12.5871	NA	NA	12.871	NA	14.9992	NA
1-1_GL0101438	14.961	16.7273	16.939	16.726	15.7985	NA	17.4431	16.3036	16.4043	15.9048	15.2225	16.5008	15.0263	15.5785	15.9587	17.0164	15.9228	16.1991	15.4139	15.1794	15.9535	14.979	16.7819	16.7412
1-1_GL0101438;1-1_GL0143497;2-1_GL0006967;2-1_GL0062493;2-3_GL0085873;5-2_GL0000467;5-8_GL0003525;6-2_GL0043237;6-4_GL0023902;7-8_GL0028253;G1-1A_GL0037478;G1-8A_GL0073811;Group2-3A_GL0097123;Group2-6A_GL0042175	18.192	17.6018	14.3783	17.5608	18.7163	17.9707	18.8678	NA	NA	NA	NA	NA	NA	18.7638	18.0572	17.8574	18.0956	NA	NA	NA	NA	NA	17.3822	18.3411
1-1_GL0101438;38_GL0050779	NA	NA	NA	NA	NA	NA	NA	12.8858	NA	NA	NA	NA	NA	NA	NA	NA	NA	NA	NA	NA	NA	NA	NA	NA
1-1_GL0101526	NA	NA	NA	NA	13.9396	14.8674	13.912	14.5771	NA	NA	NA	NA	14.1169	13.8985	14.2768	NA	NA	NA	NA	NA	NA	14.5206	14.078	14.2072
1-1_GL0101526;1-1_GL0123184;3-1_GL0060298;5-2_GL0024084;G1-1A_GL0096667;MC-0-1_GL0020527;MC-6-3_GL0028761;MC-6-4_GL0043014;S-Fe10_GL0025322;S-Fe10_GL0157138;S-Fe11_GL0106313	16.466	17.2216	17.6252	16.9301	16.0491	15.9701	14.8374	16.3404	15.4522	14.0314	16.4525	14.6607	15.5633	16.0874	16.4864	15.3803	16.337	14.766	16.0166	14.9168	15.9621	16.2497	15.9455	14.555
1-1_GL0101526;1-6_GL0007650;17_GL0057695;2-3_GL0044613;38_GL0136918;5-2_GL0024084;MC-6-3_GL0064023;MC-6-4_GL0043014;MH-6-4_GL0008319;S-Fe2_GL0192528;S-Fe6_GL0073324;S-Fe6_GL0217629	NA	NA	NA	NA	NA	NA	NA	15.1727	13.4213	NA	NA	13.0658	14.868	NA	NA	NA	NA	NA	NA	NA	14.3623	NA	13.7993	NA
1-1_GL0101526;1-6_GL0007650;17_GL0057695;38_GL0136918;5-2_GL0024084;6-4_GL0010578;MC-6-3_GL0064023;MC-6-4_GL0043014;MH-6-4_GL0008319;MH-6-4_GL0037853;S-Fe20_GL0148071;S-Fe2_GL0192528;S-Fe6_GL0073324;S-Fe6_GL0217629	14.097	13.5504	13.4561	15.2669	14.6142	15.712	15.0147	15.1149	13.8242	13.3225	13.4667	13.3795	14.8042	14.8324	15.051	14.1465	14.4504	14.2484	14.2425	13.6649	14.2561	16.4641	13.5197	14.2838
1-1_GL0101526;1-6_GL0007650;17_GL0057695;38_GL0136918;G1-5A_GL0071006;MH-6-1_GL0001778;MH-6-3_GL0134961;MH-6-4_GL0037853;S-Fe2_GL0192528;S-Fe6_GL0073324;S-Fe9_GL0260150	NA	11.8203	NA	NA	NA	14.3035	NA	12.66	NA	NA	NA	10.7523	12.9094	13.1381	NA	NA	NA	NA	NA	NA	13.4358	13.6588	NA	NA
1-1_GL0101526;1-6_GL0007650;17_GL0057695;38_GL0136918;G1-5A_GL0071006;MH-6-1_GL0001778;S-Fe2_GL0192528;S-Fe6_GL0073324;S-Fe9_GL0260150	14.3608	NA	NA	15.5553	15.5326	16.4809	15.7028	15.7215	14.3363	14.1445	15.1834	NA	15.2583	15.5329	13.6579	15.0039	15.4079	13.9532	15.0892	14.7361	15.1477	16.0122	14.8565	15.0961
1-1_GL0101526;1-6_GL0007650;MH-6-4_GL0008319	13.5494	13.9541	11.9307	14.3435	14.7019	15.7068	14.7077	14.3087	13.4459	13.8791	13.9497	12.7145	14.3944	14.664	15.0822	14.7758	13.2074	14.0276	14.114	14.9193	14.0076	15.6445	14.6408	15.2549
1-1_GL0101526;17_GL0057695;38_GL0136918;MH-6-1_GL0001778;MH-6-4_GL0008319;MH-6-4_GL0037853;S-Fe20_GL0148071;S-Fe6_GL0073324	NA	NA	NA	NA	NA	NA	NA	14.8127	13.8732	NA	NA	13.1697	14.6497	NA	NA	NA	NA	NA	NA	NA	14.7769	NA	15.0558	NA
1-1_GL0101526;5-2_GL0024084;6-4_GL0010578;S-Fe9_GL0260150	11.4541	12.5432	12.2932	13.0594	14.1719	14.8941	14.4721	15.75	12.7264	13.0126	13.7259	10.5072	13.7215	14.333	13.7819	14.3848	13.2101	12.622	12.3068	NA	12.9546	16.6671	12.4517	14.6402
1-1_GL0101526;MH-6-1_GL0001778	NA	12.1552	NA	13.311	12.8531	13.8641	12.8731	13.2778	NA	NA	12.7733	10.6335	12.8333	12.9802	12.9266	12.6535	NA	NA	NA	10.9625	12.8036	13.9409	13.3633	13.3688
11_GL0101716	NA	NA	NA	NA	11.9482	11.5708	13.4194	11.9328	NA	NA	NA	NA	NA	11.7443	NA	13.2683	NA	12.3029	NA	NA	NA	NA	13.5609	NA
11_GL0101716;23_GL0066357	NA	NA	11.58	NA	10.9374	11.3619	12.53	11.71	NA	NA	NA	10.2971	NA	11.3255	NA	12.1542	NA	NA	NA	NA	NA	NA	NA	NA
1-1_GL0102102	13.34	14.1532	13.8968	14.4695	12.9898	12.5659	11.7188	13.5695	13.7833	12.064	14.5747	12.3337	12.4142	13.1123	12.8529	11.7551	13.0991	11.5868	14.0705	13.0272	12.1379	13.7336	11.7996	NA
1-1_GL0102102;28_GL0001933;MC-0-3_GL0093876	NA	15.9887	NA	NA	NA	13.8035	NA	NA	NA	NA	NA	13.7687	13.1418	NA	NA	NA	13.8307	NA	15.2351	NA	14.1311	14.6984	NA	12.5177
1-1_GL0102281;38_GL0137665;MC-0-1_GL0018910;MH-6-3_GL0120983	11.0934	11.7816	10.3764	11.6546	11.514	12.4918	11.8843	11.2034	10.774	NA	10.8743	NA	12.5494	11.4087	12.3971	11.6968	10.1189	10.8246	12.359	11.0843	10.6675	13.8878	7.9563	9.14832
1-1_GL0102282;1A-dyr2-07_GL0052714;4-2_GL0016401;4-3_GL0089082;7-4_GL0011727;8-1_GL0133000;MC-6-2_GL0174343;MC-6-4_GL0010557	NA	NA	NA	NA	NA	15.0402	NA	NA	11.6006	NA	NA	13.2012	14.9965	NA	NA	NA	NA	NA	NA	NA	14.2318	NA	12.5629	NA
1-1_GL0102282;7-4_GL0011727;8-1_GL0133000	NA	13.0698	11.8061	14.2513	12.7991	13.5878	13.0551	13.7784	NA	NA	12.4202	NA	12.7935	12.9305	NA	12.7829	NA	NA	12.4428	NA	12.7876	15.3308	NA	NA
1-1_GL0102282;7-4_GL0011727;8-1_GL0133000;MC-6-4_GL0010557	13.833	13.8221	13.3673	15.5064	14.6475	15.402	14.2012	15.1696	13.7284	12.8977	14.1423	12.2628	14.8346	14.3373	14.7591	13.2895	12.6846	13.4659	14.5091	13.5439	14.6326	17.1362	12.1011	12.3525
1-1_GL0102282;MC-6-4_GL0010557	NA	NA	NA	NA	NA	13.4441	NA	13.032	NA	NA	NA	NA	NA	NA	11.6753	NA	NA	NA	NA	NA	11.5883	NA	NA	NA
11_GL0102458	NA	NA	NA	NA	NA	NA	NA	NA	NA	NA	NA	NA	NA	NA	9.59762	NA	NA	NA	NA	NA	NA	NA	NA	NA
11_GL0102458;4-7_GL0072954	NA	NA	NA	NA	NA	NA	NA	NA	NA	NA	NA	NA	NA	NA	9.81267	NA	NA	NA	NA	NA	NA	NA	NA	NA
11_GL0102458;4-7_GL0072954;5-2_GL0058072;6-7_GL0103377;8_GL0048174	NA	NA	NA	NA	NA	11.5019	NA	11.152	NA	NA	NA	NA	10.334	NA	NA	NA	NA	NA	NA	NA	10.7173	NA	NA	NA
11_GL0102458;4-7_GL0072954;5-2_GL0058072;8_GL0048174	NA	NA	NA	NA	NA	14.13	NA	14.7322	13.0566	NA	NA	NA	13.6573	NA	NA	14.0923	NA	NA	NA	NA	13.4759	14.1359	12.7912	NA
11_GL0102458;4-7_GL0072954;8_GL0048174	NA	NA	NA	NA	NA	NA	NA	NA	NA	NA	NA	NA	NA	NA	11.0192	NA	NA	NA	NA	NA	NA	NA	NA	NA
11_GL0102613	NA	NA	13.83	13.9794	18.1789	NA	NA	NA	NA	NA	12.7184	NA	18.6553	18.0674	NA	13.2825	NA	NA	16.2063	NA	14.2401	14.9789	14.9493	12.4495
11_GL0102613;2-2_GL0087128	15.312	16.752	14.3738	17.8481	18.7155	17.4098	15.8592	NA	17.261	16.4825	17.4326	NA	18.5755	18.6557	16.5477	16.3593	15.9186	16.8533	18.9614	16.7049	NA	17.5138	16.685	15.976
11_GL0102613;2-2_GL0087128;2-7_GL0062923;2A-dyr16-07_GL0031078;3-8_GL0041886;7-1_GL0026366;S-Fe17_GL0071731;S-Fe20_GL0138630	NA	NA	NA	NA	NA	NA	NA	12.394	NA	NA	NA	NA	NA	NA	NA	NA	NA	NA	NA	NA	NA	NA	NA	NA
11_GL0102613;2-7_GL0062923;3-8_GL0041886;4-8_GL0066669;7-1_GL0026366;G1-5A_GL0063524;S-Fe17_GL0071730;S-Fe20_GL0138630	19.0634	NA	NA	NA	NA	NA	NA	NA	NA	NA	NA	NA	NA	NA	20.7496	NA	NA	NA	NA	NA	NA	NA	NA	NA
1-1_GL0102656	NA	NA	NA	NA	12.9017	NA	12.7879	13.0582	11.8779	NA	NA	NA	11.8301	12.9571	11.5399	NA	NA	14.349	NA	NA	12.9066	NA	13.1637	12.6288
1-1_GL0102656;2-3_GL0065534	12.8867	NA	11.0541	10.1626	13.2572	NA	13.322	10.9591	11.7947	NA	12.3921	12.7793	12.7344	13.6022	12.2449	11.443	11.0398	NA	13.2338	13.7474	12.8237	NA	10.1928	10.8703
1-1_GL0102656;2-3_GL0065534;31_GL0045860	14.8717	NA	NA	NA	14.5251	NA	15.1581	NA	13.7075	NA	14.2125	14.8268	14.3047	15.2281	14.5564	13.5804	13.7393	14.1413	14.2121	15.6343	14.3581	NA	NA	13.1391
1-1_GL0102656;2-3_GL0065534;31_GL0045860;6-2_GL0051644	14.9318	NA	13.5554	12.1984	16.3577	14.0685	16.5312	14.6066	15.2469	NA	NA	NA	15.5531	16.1381	15.8048	14.3552	14.8488	14.747	15.9539	16.9035	15.1471	12.5332	13.9246	14.5793
1-1_GL0102656;2-3_GL0065534;6-2_GL0051644	16.3762	11.7478	13.584	12.3071	15.9284	14.2979	16.2998	13.7534	14.71	13.0364	15.7998	16.3613	15.8361	15.8826	15.7973	14.3944	14.3928	14.5003	15.7677	16.8517	15.5638	13.5656	13.5378	14.3987
1-1_GL0102656;31_GL0045860;6-2_GL0051644	11.7418	NA	9.69559	NA	12.1335	10.8054	12.3102	11.2199	11.6197	NA	NA	NA	12.8498	12.3323	12.4823	10.3955	11.4952	13.0628	11.5213	NA	12.1727	NA	NA	11.5791
1-1_GL0102656;6-2_GL0051644	NA	NA	NA	NA	12.6623	NA	11.8393	11.1894	13.5709	NA	NA	NA	14.031	12.8859	13.6618	12.3724	13.0587	NA	13.0397	NA	12.7857	NA	NA	NA
1-1_GL0103073	12.7725	14.4286	13.05	14.8998	13.1483	14.581	13.14	14.1702	12.8269	14.1424	13.2088	13.3657	12.7909	13.1271	12.5257	12.2702	13.0309	13.466	12.8624	12.8511	13.0018	12.8985	13.2155	12.6207
1-1_GL0103334	NA	NA	NA	NA	NA	12.4322	NA	NA	NA	NA	NA	NA	12.4253	NA	NA	NA	NA	NA	NA	NA	12.398	NA	NA	10.8127
1-1_GL0103334;2-1_GL0037499;2-1_GL0100791;6-2_GL0062533;7-1_GL0075240;G1-5A_GL0147092	11.6809	NA	NA	NA	12.3015	11.4289	12.5113	NA	10.3957	NA	NA	NA	11.9576	12.1912	12.0018	NA	NA	NA	12.1187	NA	12.3016	9.93547	10.5821	NA
1-1_GL0103334;2-1_GL0100791;G1-5A_GL0147092	13.0954	NA	NA	NA	13.4497	NA	15.4013	NA	NA	NA	11.9755	NA	NA	13.7854	14.4719	NA	NA	NA	NA	NA	13.5241	NA	12.6324	NA
11_GL0103683	NA	NA	12.6941	12.591	15.1121	13.9733	14.3398	12.3624	12.346	11.2746	NA	NA	NA	15.191	11.9276	NA	13.3675	11.6227	NA	NA	13.3553	NA	NA	13.6862
1-1_GL0103727	NA	NA	NA	13.3071	14.0235	13.7587	13.7935	12.486	NA	NA	13.7056	NA	15.0476	13.7285	14.6226	12.9161	15.1084	NA	14.0326	NA	13.6232	14.9937	11.4585	NA
1-1_GL0103727;1-2_GL0047570;S-Fe9_GL0220525	12.1217	10.9437	9.98214	10.6375	12.6164	12.3724	13.5471	12.4233	11.6793	NA	11.6967	11.1869	13.6198	12.6332	12.9315	11.419	11.9145	10.6084	11.9971	11.3266	13.2755	11.7706	11.3216	10.519
1-1_GL0103727;17_GL0125692;1A-dyr4-07_GL0031946;1A-dyr4-07_GL0083332;20_GL0096466;4-1_GL0071382;5-7_GL0011796;6-7_GL0002413;7-5_GL0153411;8-2_GL0038578;G1-5A_GL0008401;Group2-8A_GL0000783;MH-6-4_GL0014461;S-Fe20_GL0078171;S-Fe20_GL0145970;S-Fe2_GL0088178	NA	NA	14.018	15.0842	15.2935	NA	NA	NA	NA	NA	NA	NA	NA	15.2821	15.5625	NA	14.4051	NA	NA	NA	NA	NA	NA	14.111
1-1_GL0103727;17_GL0125692;1A-dyr4-07_GL0031946;1A-dyr4-07_GL0083332;20_GL0096466;4-1_GL0071382;5-7_GL0011796;6-7_GL0002413;7-5_GL0153411;Group2-8A_GL0000783;MH-6-4_GL0014461;S-Fe20_GL0078171;S-Fe20_GL0145970;S-Fe2_GL0088178;S-Fe7_GL0142498	NA	NA	NA	NA	17.2479	17.422	17.0471	NA	17.0691	NA	16.7516	16.4357	18.4667	17.2053	17.0401	15.9896	16.2291	16.0187	17.0159	16.2072	18.5981	18.0425	16.4404	15.6471
1-1_GL0103727;17_GL0125692;1A-dyr4-07_GL0031946;1A-dyr4-07_GL0083332;4-1_GL0071382;6-7_GL0002413;7-5_GL0153411;S-Fe20_GL0078171	15.6165	13.1837	11.8846	14.3507	15.9761	15.8818	15.7545	NA	NA	13.7461	15.3983	NA	15.033	15.9609	15.9155	15.2319	14.6732	14.0412	16.4944	15.2	NA	16.6609	17.6869	14.3967
1-1_GL0103727;17_GL0125692;4-1_GL0071382;7-5_GL0153411	NA	NA	NA	NA	NA	NA	NA	NA	NA	NA	NA	NA	NA	NA	12.5544	NA	NA	NA	NA	NA	NA	NA	NA	NA
1-1_GL0103727;20_GL0131578	14.17	12.981	NA	NA	NA	NA	NA	13.48	NA	NA	NA	10.7807	14.0665	NA	NA	14.1718	NA	NA	NA	NA	13.84	NA	NA	NA
1-1_GL0103727;20_GL0150260;8-2_GL0053421;S-Fe2_GL0088178	NA	NA	NA	NA	13.1185	NA	NA	12.0206	NA	NA	13.1709	NA	14.6398	13.0231	13.907	NA	NA	NA	NA	NA	13.3283	15.1233	NA	NA
1-1_GL0103727;6-5_GL0136459;7-8_GL0103582	NA	NA	NA	NA	NA	NA	NA	13.8039	NA	NA	NA	NA	NA	NA	NA	NA	NA	NA	NA	NA	NA	NA	NA	NA
1-1_GL0103727;7-8_GL0103582	NA	10.0234	NA	NA	12.9247	13.0435	12.9276	12.6009	12.2896	NA	12.9025	NA	13.4467	12.5654	12.8498	NA	11.8759	NA	12.1141	NA	13.0493	13.7507	11.7397	NA
1-1_GL0103727;8-2_GL0053421;MH-6-3_GL0057767;S-Fe20_GL0145970	15.4299	14.8122	13.5849	15.1874	16.0458	15.8911	16.0649	14.8065	15.9663	13.0622	15.9114	14.5899	17.6916	15.9195	16.9624	14.886	14.4002	14.8851	16.8611	15.2162	16.5112	16.5383	13.8675	13.1977
1-1_GL0103727;S-Fe20_GL0145970	11.1036	NA	10.3071	NA	13.2955	12.9593	12.9159	12.2157	12.3956	NA	NA	NA	15.6847	12.8659	14.3469	10.1524	11.8211	12.682	13.6194	NA	14.2665	12.5428	NA	9.82283
1-1_GL0103727;S-Fe7_GL0142498	13.6622	12.9505	12.7144	12.7306	15.4371	14.3274	15.0409	NA	14.1237	NA	14.3966	12.1059	16.5424	15.8295	13.2535	13.6811	13.8567	13.3006	15.1227	13.481	16.9387	13.9001	13.2473	12.1304
1-1_GL0103775;MC-0-1_GL0066732	13.8238	15.5212	14.5589	16.2348	14.9148	15.4306	13.3817	15.5231	14.569	13.9297	15.3392	13.9688	15.4721	14.6347	13.0623	14.2529	13.7893	13.9167	15.0717	14.5335	14.5985	13.8868	14	13.0113
11_GL0104030	NA	NA	NA	NA	15.8365	NA	NA	NA	NA	NA	NA	NA	16.3617	15.6464	16.0893	15.252	16.2282	NA	NA	NA	17.3484	14.7701	NA	11.8393
11_GL0104167	NA	14.6237	NA	13.0814	15.2459	16.0341	16.361	14.6546	13.0841	15.5763	NA	NA	13.9176	15.1836	13.1953	15.0611	11.5489	NA	NA	12.8719	15.4407	16.033	16.0426	14.7337
11_GL0104167;23_GL0140512;4-7_GL0125984;6-7_GL0030818	11.4042	11.5159	11.1279	10.4244	12.2492	13.8629	13.0875	12.9874	11.1242	12.0359	11.1698	10.9035	12.8513	12.5389	12.7892	11.4713	11.8018	12.3926	12.7957	11.6326	13.1561	13.7056	13.0938	11.9774
11_GL0104167;23_GL0140512;6-6_GL0048311;6-7_GL0030818;8-2_GL0090639	16.805	17.1436	16.409	16.975	16.9354	18.325	17.1752	15.8942	17.3323	16.9726	16.2051	15.754	17.3116	17.006	17.6469	17.3801	NA	17.5533	16.4756	16.7337	17.2477	18.2899	16.8864	16.271
11_GL0104167;4-7_GL0125984;6-7_GL0030818	NA	NA	NA	NA	13.4059	NA	NA	NA	NA	12.862	NA	NA	NA	13.0948	13.1951	NA	NA	NA	NA	NA	NA	NA	NA	12.9894
11_GL0104167;6-7_GL0030818	16.9356	15.7383	15.3537	15.2304	16.8865	17.778	18.2597	16.7108	16.5135	16.9371	16.1525	15.9456	17.8723	17.0832	15.1656	16.2323	16.3512	16.881	16.9772	16.2807	18.101	19.3264	17.8479	15.82
1-1_GL0104180	10.9545	12.519	11.9132	12.4097	NA	11.407	NA	11.9038	11.0137	11.2848	11.757	NA	11.9142	NA	11.6859	NA	11.6986	NA	12.8872	11.171	10.993	12.5512	11.532	NA
1-1_GL0104331	NA	NA	NA	14.3128	12.661	13.0731	12.3624	NA	12.3222	NA	11.989	NA	NA	NA	12.8868	12.0602	11.4484	11.7766	NA	NA	NA	NA	NA	12.2166
1-1_GL0104331;Group2-8A_GL0070902;S-Fe6_GL0127411	12.2497	12.0094	NA	11.6084	12.6032	12.6771	12.0873	13.0177	11.4165	NA	11.5912	NA	12.4534	12.5772	12.7064	12.0717	11.8671	NA	12.3595	NA	12.3182	14.6936	10.2311	12.0266
1-1_GL0104334	NA	NA	NA	NA	NA	NA	NA	NA	14.5704	13.0029	NA	14.1033	14.4778	NA	14.6324	NA	NA	14.38	14.1342	12.9606	NA	13.7981	13.8413	14.579
1-1_GL0104334;2-1_GL0059292;2-2_GL0005186;2-3_GL0086048;2-7_GL0007354;2A-dyr16-06_GL0039105;2B-dyr19-06_GL0030623;6-2_GL0004768;7-6_GL0055493;8-2_GL0073909;G1-2A_GL0118566;Group2-1A_GL0049538;Group2-2A_GL0001900;Group2-3A_GL0004437;S-Fe16_GL0050487;S-Fe9_GL0216616;S-Fe9_GL0229166	16.0179	15.1789	15.6273	15.8759	17.1158	16.834	16.7755	16.5252	16.6121	14.9058	16.4602	16.4402	17.7085	17.0811	17.3231	16.7052	16.5174	16.3722	16.9743	16.5803	16.6701	16.4081	16.0586	16.1543
1-1_GL0104334;2-1_GL0059292;2-2_GL0005186;2-3_GL0086048;2-7_GL0007354;7-6_GL0055493;8-2_GL0073909;G1-2A_GL0118566;Group2-1A_GL0049538;Group2-2A_GL0001900;S-Fe16_GL0050487;S-Fe9_GL0216616;S-Fe9_GL0229166	NA	NA	NA	NA	14.5066	14.2844	14.4513	11.8464	14.2585	NA	13.9851	NA	15.2025	14.2843	14.2194	14.8849	NA	14.1504	14.8174	13.7789	14.6688	14.0133	14.4985	NA
1-1_GL0104334;2-2_GL0005186;2-3_GL0086048;2-7_GL0007354;6-2_GL0004768;8-2_GL0073909;Group2-2A_GL0001900;Group2-3A_GL0004437;Group2-8A_GL0065401;MC-6-2_GL0089037	14.1918	NA	13.6931	13.6815	16.0052	15.7707	14.788	13.5069	15.7215	14.1054	15.2741	15.3689	16.4246	16.191	15.722	15.0796	14.8284	14.711	16.8058	15.4001	15.9398	14.7344	13.9513	13.8608
1-1_GL0104334;2-2_GL0005186;Group2-3A_GL0004437;S-Fe16_GL0050487	13.2303	11.49	13.3881	13.5157	15.8032	15.2476	14.6238	NA	16.0988	13.9081	14.1786	14.7634	16.1974	15.9375	15.674	14.7773	15.2208	13.4398	15.575	15.2407	15.5151	12.2439	13.7406	13.309
1-1_GL0104334;2-3_GL0086048;2-7_GL0007354;5-2_GL0039094;6-2_GL0004768;7-6_GL0055493;8-2_GL0073909;G1-2A_GL0118566;Group2-1A_GL0049538;Group2-2A_GL0001900;Group2-3A_GL0004437;Group2-8A_GL0065401;MC-6-2_GL0089037;S-Fe16_GL0050487;S-Fe3_GL0039343;S-Fe9_GL0229166	15.8303	15.7628	15.8131	15.958	17.1993	17.1718	17.2378	16.957	17.0949	14.341	16.3921	15.5386	17.8182	17.1781	17.5988	15.966	16.8926	16.4072	17.1	16.4401	16.667	16.6198	15.1229	15.6277
1-1_GL0104702	NA	NA	NA	NA	NA	NA	NA	NA	16.4972	15.3558	NA	NA	16.618	NA	NA	NA	16.023	16.3548	NA	15.4823	15.9945	NA	14.9307	NA
1-1_GL0104706	NA	NA	NA	NA	NA	NA	NA	NA	NA	NA	NA	NA	10.9146	NA	11.3221	9.16622	NA	NA	NA	NA	NA	NA	10.9687	NA
1-1_GL0104706;20_GL0054119	NA	NA	NA	NA	12.1929	16.2561	NA	13.5225	NA	NA	NA	NA	15.4224	12.3672	16.9666	14.9082	NA	NA	NA	NA	14.4276	13.7228	15.3687	13.7224
1-1_GL0104839	12.6557	12.338	13.6354	13.2823	12.6794	12.4048	11.119	13.1505	12.7871	NA	13.7084	12.5327	NA	12.5228	11.2735	12.0062	12.3318	NA	13.5328	13.2004	10.9713	13.3536	NA	NA
1-1_GL0104841	12.9212	12.5841	13.6194	13.2345	12.2553	12.1925	11.8318	13.0408	12.671	NA	13.4061	12.161	NA	NA	11.7204	NA	12.1035	NA	13.8093	13.2663	NA	13.4483	NA	NA
1-1_GL0104842	13.9163	13.493	13.6631	13.8574	12.7118	12.604	11.7779	13.5049	13.4531	11.5877	14.4051	12.8145	10.8768	12.7667	12.4996	11.3839	12.8876	NA	13.8584	13.9338	11.4768	13.6234	NA	NA
1-1_GL0106191	NA	NA	NA	NA	14.4973	NA	NA	NA	13.1185	NA	NA	NA	13.0949	14.4712	11.9181	NA	NA	NA	NA	NA	12.3633	NA	13.3091	10.6257
1-1_GL0106191;1-8_GL0071629	13.1855	NA	13.0509	NA	17.0482	13.5576	12.27	NA	15.3596	NA	15.3942	13.8167	14.9479	16.7135	16.5176	NA	NA	13.0204	NA	NA	13.4922	NA	15.5685	14.2974
1-1_GL0106191;1-8_GL0071629;MH-6-4_GL0119103	13.4695	NA	14.9541	NA	16.9771	NA	NA	NA	16.6098	NA	14.853	14.5179	14.9853	16.9157	15.9249	NA	NA	NA	15.4271	NA	15.1265	NA	16.3213	NA
11_GL0106913;S-Fe12_GL0182026	NA	NA	NA	NA	12.2567	12.0671	13.4036	11.847	NA	NA	NA	NA	10.9805	12.6282	11.8543	12.0121	NA	NA	NA	11.4665	11.1925	NA	12.9773	NA
11_GL0106920	14.0757	NA	15.2025	13.2504	15.2489	14.9722	16.3877	15.5572	12.676	13.1446	NA	NA	13.3319	15.2819	13.4099	16.7285	NA	14.3647	13.8053	14.2992	13.7679	14.5044	16.6604	14.7409
11_GL0106926	NA	NA	NA	NA	NA	14.6534	16.0923	14.8977	NA	12.054	NA	NA	12.0902	14.5994	NA	NA	11.7592	NA	12.5282	NA	12.9585	NA	NA	NA
11_GL0107160	NA	NA	14.8182	13.9137	13.4153	14.014	13.8108	14.1096	NA	NA	NA	NA	11.1312	13.2904	12.3513	15.7986	NA	12.9943	NA	12.5563	11.4669	13.739	14.7341	12.8223
1-1_GL0107181	13.3171	14.4285	13.6942	15.3101	14.2672	15.1734	13.5237	14.1036	14.0715	14.359	14.5612	13.7221	14.3434	14.2271	13.5907	12.4996	13.7864	14.2103	14.0813	13.7552	13.3722	13.8313	13.1757	13.1862
1-1_GL0107181;MC-0-1_GL0000664	13.6036	15.8766	14.6294	15.7958	14.7098	14.8645	13.7438	15.3488	15.2246	15.2916	15.1227	14.8571	14.4951	14.6464	13.6832	13.8847	14.4455	14.2342	15.0408	14.6478	13.166	13.3022	13.3651	14.057
1-1_GL0107182	12.9394	13.5824	12.7772	14.1883	13.6017	14.3197	13.0069	13.3313	13.2482	13.3277	13.7734	13.2023	14.1318	13.6091	13.1317	NA	12.8238	13.5612	13.4973	13.2818	13.1963	13.1824	NA	12.4417
1-1_GL0107182;MC-0-1_GL0000663	13.3325	15.5364	14.74	15.2452	13.8549	13.5695	13.3942	13.9429	13.9993	14.3138	14.4719	13.7849	13.1327	13.8288	12.8672	13.3223	13.4595	13.474	13.599	14.0267	11.8721	12.4277	12.4581	12.9687
1-1_GL0107186	12.6639	13.6535	12.8093	14.5103	12.9651	14.3513	12.6843	13.0834	13.0659	13.7912	13.5296	12.9756	12.9389	12.9557	12.3663	11.7313	12.9088	13.5389	13.0347	12.9473	12.4936	12.4694	12.3587	12.2746
1-1_GL0107186;MH-0-3_GL0000820	14.5617	16.361	15.4961	16.4164	14.9092	15.4466	14.1795	15.8254	15.2617	15.8214	15.348	15.0097	14.6512	15.1381	14.1068	14.1515	15.2493	14.8839	14.9945	15.2506	13.5714	13.422	14.2622	14.8607
1-1_GL0107186;MH-0-3_GL0000820;S-Fe1_GL0164230	13.9753	15.7495	14.7111	15.6129	13.9427	14.7235	13.6971	14.6583	14.2269	15.309	14.6348	14.2905	13.5449	13.981	13.717	13.6747	14.4343	13.7152	14.1378	14.1148	12.4224	13.1089	12.9121	14.1195
11_GL0107512	NA	NA	13.134	12.0292	13.9461	13.6051	15.1288	14.0983	NA	NA	NA	NA	13.2002	13.9355	12.9861	15.0666	12.8333	12.5627	11.94	13.42	13.3939	14.3091	15.364	11.6671
1-1_GL0107764	NA	NA	NA	NA	13.5577	14.7483	13.2486	14.3698	NA	NA	NA	NA	14.1625	13.7601	14.6591	14.0371	NA	NA	NA	NA	14.082	14.6104	14.3353	14.3038
1-1_GL0107767	13.8284	NA	NA	NA	12.4002	12.0373	NA	NA	NA	NA	11.5867	NA	12.8555	12.337	13.1097	NA	NA	NA	NA	NA	13.1845	13.3924	NA	NA
1-1_GL0107767;11_GL0010402;20_GL0075449;4-7_GL0095119;6-2_GL0018346;6-7_GL0120327;7-8_GL0014644;MH-6-4_GL0125371	14.9843	13.3911	12.2327	14.8362	16.1478	16.0674	17.1504	NA	NA	12.2065	15.5934	NA	16.59	16.239	17.0184	15.6093	13.2384	15.3824	15.491	14.9349	NA	16.4567	NA	13.6008
1-1_GL0107767;20_GL0075449	17.2166	14.8546	15.1188	15.8086	16.6151	14.9129	17.3072	15.1465	16.0974	15.6002	16.517	15.2422	17.4161	16.6811	16.8927	15.2914	14.8757	14.4339	17.1562	13.0488	16.5319	16.5981	14.3338	14.2916
1-1_GL0108082	14.5593	15.0379	14.3853	15.7274	16.3085	16.2564	15.3035	15.4629	14.6245	13.3028	14.8621	14.2032	16.7331	16.323	15.9943	15.0795	14.8879	14.7984	15.6916	15.1049	15.9896	17.1202	14.332	14.3098
1-1_GL0108221;10_GL0030637;2-2_GL0012822;2-3_GL0001661;4-1_GL0075104;4-5_GL0007293;5-1_GL0063390;7-1_GL0046391;G1-2A_GL0018708;G1-8A_GL0025097;Group2-1A_GL0053280	12.7239	13.3304	13.4621	13.4606	15.6011	14.6772	13.3537	13.6983	14.3181	13.9811	13.6862	13.3456	14.1058	16.0411	14.1073	14.2103	14.3053	13.7047	15.5116	13.9807	13.0537	14.279	14.0333	13.7962
1-1_GL0108221;2-2_GL0012822;4-1_GL0075104;4-5_GL0007293;5-1_GL0063390;7-1_GL0046391;G1-8A_GL0025097;Group2-1A_GL0053280	14.4627	13.6459	13.7196	13.6728	15.7425	15.496	14.8008	14.2143	14.7809	13.3377	15.6164	15.2298	15.8218	16.005	15.0041	14.8794	14.6616	14.7809	17.775	15.3732	15.2456	14.9346	14.26	14.1308
1-1_GL0108221;4-5_GL0007293	NA	NA	NA	NA	NA	NA	NA	NA	13.3613	NA	NA	NA	NA	NA	NA	NA	NA	NA	NA	10.5691	12.341	12.9302	NA	NA
1-1_GL0108544;23_GL0016380	NA	NA	NA	12.1274	12.405	12.5495	12.228	11.6751	12.8689	12.4097	12.3031	NA	NA	12.3981	12.9999	11.9301	12.593	NA	12.0736	12.0942	12.7332	13.0271	12.3831	11.7736
1-1_GL0108544;23_GL0016380;MH-6-4_GL0170683	12.9104	11.0348	11.4815	12.9168	13.3369	14.2395	13.1792	12.1102	13.4881	13.2977	12.9631	12.5728	13.3131	13.206	13.972	12.5674	13.4162	12.7994	13.2823	11.9705	14.1254	14.1395	13.2375	12.6225
1-1_GL0108628;2-4_GL0069532;47_GL0086891;MC-6-3_GL0121128;MH-6-4_GL0066222;S-Fe20_GL0151094	11.5082	11.0279	10.6676	11.0997	11.7452	10.9086	11.9154	NA	NA	NA	11.8283	NA	13.0527	12.0447	12.7396	NA	NA	NA	13.1448	10.7113	12.4068	11.0147	NA	NA
11_GL0108656	13.9109	NA	16.6069	NA	16.2965	17.9214	17.9452	17.9448	NA	NA	NA	NA	15.0494	16.4979	13.7862	18.809	NA	15.6685	15.1774	15.8991	16.1482	13.2778	18.9233	NA
11_GL0108772	16.0329	17.5206	15.4186	15.9382	13.5227	12.5462	14.0059	15.828	12.9882	12.3797	15.5437	15.8589	14.7897	13.2683	13.9866	14.8699	14.5891	13.6245	14.6748	15.1396	14.1172	14.0719	15.6985	15.1571
1-1_GL0108808;20_GL0151793;38_GL0029624;MH-0-4_GL0053297;MH-6-3_GL0045414;S-Fe7_GL0106544	NA	NA	NA	NA	NA	11.8042	NA	10.6962	NA	NA	11.1421	NA	12.0384	11.2531	NA	10.4913	NA	NA	11.5963	NA	10.5338	12.695	NA	NA
1-1_GL0108808;MH-6-3_GL0045414	NA	NA	NA	NA	12.7081	13.4202	NA	NA	NA	NA	NA	NA	NA	NA	13.173	NA	NA	NA	NA	NA	12.4858	14.4462	NA	NA
1-1_GL0108886	NA	NA	NA	NA	NA	NA	NA	NA	NA	NA	NA	NA	NA	NA	NA	10.3314	NA	NA	NA	NA	9.41967	NA	NA	NA
11_GL0108888	NA	11.1833	14.3902	13.4419	15.0463	15.5265	17.1474	15.2284	12.1618	11.5779	NA	10.7635	12.8493	15.2594	13.1931	15.0681	11.4988	14.0832	13.894	14.3972	13.8254	15.1685	15.3207	13.7879
11_GL0108888;11_GL0153063	12.9508	NA	14.2035	13.874	15.8778	15.9638	17.0451	15.8137	13.333	NA	13.7315	12.8861	15.6932	15.8926	15.7893	15.9691	15.5141	14.7638	14.4386	15.5076	16.5655	15.9599	16.6014	13.6563
11_GL0108888;11_GL0153063;1A-dyr4-07_GL0109263	14.0528	13.1721	14.4486	14.2846	16.0281	15.7395	16.6484	15.481	14.8534	13.9317	15.2614	14.6428	15.881	16.1304	16.0485	16.2107	15.8102	15.4493	15.5131	15.5474	16.7711	15.8404	16.1626	14.0836
1-1_GL0108993;11_GL0121982;1A-dyr2-07_GL0034958;1A-dyr2-07_GL0064584;1A-dyr3-06_GL0017534;1A-dyr5-06_GL0013898;1_GL0014036;2-1_GL0015271;2-1_GL0076259;26_GL0143043;34_GL0079617;37_GL0018308;5-2_GL0064268;6-3_GL0118595;7-3_GL0070741;7-5_GL0063140;8-5_GL0030763;G1-3A_GL0067553;S-Fe10_GL0021310;S-Fe2_GL0146399;S-Fe3_GL0211645	15.2515	16.0873	14.753	16.1972	17.058	17.9789	17.3278	17.5432	16.6007	16.043	16.4108	15.7048	16.9328	17.2851	17.4699	16.4018	17.4178	16.4149	16.9741	16.1548	17.0451	17.555	16.2194	16.2825
1-1_GL0108993;11_GL0121982;1A-dyr2-07_GL0034958;1A-dyr3-06_GL0017534;1A-dyr5-06_GL0013898;1_GL0014036;34_GL0079617;37_GL0018308;6-2_GL0091659;6-3_GL0002724;6-3_GL0118595;G1-3A_GL0067553;S-Fe10_GL0021310;S-Fe3_GL0211645	NA	NA	NA	NA	NA	NA	NA	14.4754	NA	NA	NA	11.7167	13.9192	NA	NA	NA	NA	NA	NA	NA	14.1019	NA	NA	NA
1-1_GL0108993;2-1_GL0015271;2-1_GL0076259;2-3_GL0014793;26_GL0143043;34_GL0079617;5-2_GL0064268;7-5_GL0063140;7-7_GL0107699;G1-3A_GL0067553	13.011	11.0552	10.6714	11.0852	13.366	14.0496	14.0946	13.8414	12.4317	11.1762	12.2911	13.9716	13.6646	14.0192	13.6571	12.0995	13.369	12.715	13.5586	13.7281	13.9797	11.5011	12.6092	13.0366
1-1_GL0108993;34_GL0079617	NA	NA	11.0858	NA	NA	13.554	NA	13.2932	NA	NA	NA	NA	13.914	NA	NA	NA	NA	NA	NA	NA	NA	NA	13.1678	NA
1-1_GL0108993;34_GL0079617;7-5_GL0063140;G1-3A_GL0067553	NA	NA	NA	NA	NA	NA	NA	13.5593	NA	NA	NA	14.1023	12.9953	NA	NA	NA	NA	NA	NA	NA	13.784	NA	NA	NA
1-1_GL0108993;34_GL0079617;8-1_GL0126821	15.7866	15.0125	15.2958	NA	17.2702	NA	NA	NA	17.3475	NA	17.1812	16.4943	NA	17.4291	NA	16.8594	16.9806	16.7902	17.959	16.3723	17.1613	17.0785	15.8045	15.8703
1-1_GL0108993;34_GL0079617;G1-3A_GL0067553	14.2587	16.1974	15.992	15.8907	16.9329	17.3745	16.581	17.2986	17.5283	15.0875	15.8758	15.9317	15.9921	16.9074	16.2158	16.7374	16.0904	17.0545	16.4306	15.6632	17.7956	15.3971	15.3693	16.3341
11_GL0109028	NA	12.789	NA	12.6716	NA	11.3612	NA	9.96943	NA	NA	NA	NA	NA	NA	NA	NA	NA	NA	NA	NA	10.7076	NA	NA	NA
11_GL0109028;2-2_GL0083404	13.85	17.1284	13.0313	17.1041	NA	14.5019	12.1069	NA	NA	NA	14.9482	14.5523	NA	12.0098	NA	NA	NA	NA	12.3721	14.3655	15.7529	NA	12.7492	NA
1-1_GL0109225;1-8_GL0064960;7-5_GL0154146;Group2-3A_GL0011001	15.8351	15.5496	15.2699	15.697	17.4952	17.0728	16.049	16.2846	16.8673	15.7381	16.5328	17.1256	17.4613	17.4626	16.8647	16.9377	17.0548	16.9955	17.4687	17.0154	16.5999	16.7931	16.8661	16.1722
1-1_GL0109225;2-1_GL0066248	11.914	10.5583	11.8878	NA	12.9842	11.2897	11.8976	12.5868	11.3791	NA	11.8454	11.8872	14.0319	13.2678	13.2439	11.5993	13.3917	12.948	13.3657	12.8312	13.5939	13.1381	13.3277	12.0888
1-1_GL0109227;1-1_GL0111801;1-3_GL0083931;2-1_GL0087638;2-1_GL0089701;2B-dyr19-06_GL0030526;6-6_GL0028101;G1-8A_GL0100514;Group2-3A_GL0004558;S-Fe12_GL0050488	10.9898	NA	NA	NA	11.6953	NA	NA	11.5318	NA	NA	10.8849	10.2095	11.4515	11.5389	12.169	10.5257	10.8595	9.75003	12.2908	11.207	NA	11.3854	NA	9.72318
1-1_GL0109227;1-3_GL0083931;1A-dyr1-07_GL0015345;Group2-3A_GL0004558	NA	12.0936	NA	10.9663	13.8917	12.6381	13.0683	13.9871	13.3502	12.1489	13.878	14.6266	NA	14.0676	13.9018	12.6257	14.6596	14.0428	14.7177	15.0245	14.7146	13.0307	13.3463	NA
1-1_GL0109227;2-4_GL0006265;Group2-3A_GL0004558	NA	NA	NA	NA	12.5598	10.9844	NA	11.6613	NA	NA	NA	10.8275	13.2241	12.3823	11.6836	10.8374	13.1705	11.1776	12.2122	NA	11.3473	12.0945	13.3078	NA
1-1_GL0109227;G1-1A_GL0100162	NA	NA	11.1298	NA	NA	NA	NA	NA	11.4879	11.7488	NA	NA	14.34	13.0556	15.7417	14.0013	15.9184	12.9619	13.9632	NA	NA	13.0286	12.5802	NA
1-1_GL0109227;Group2-2A_GL0102032	NA	12.1674	NA	11.9833	12.3516	NA	12.5309	12.0823	NA	NA	11.8831	12.3102	11.879	12.3551	13.5424	13.2647	14.9175	11.6088	NA	12.3251	13.1489	13.6202	14.2713	12.1193
1-1_GL0109229	NA	NA	NA	NA	NA	NA	NA	NA	NA	NA	NA	NA	NA	NA	NA	NA	14.7544	NA	NA	NA	NA	NA	12.4272	NA
1-1_GL0109229;Group2-3A_GL0004560	NA	NA	NA	NA	NA	NA	NA	NA	NA	NA	NA	NA	NA	NA	NA	NA	13.3677	NA	NA	NA	NA	NA	10.5467	NA
11_GL0109255	16.5498	16.2881	15.7622	15.3812	13.55	14.377	13.2877	15.2924	14.9428	15.2732	15.3523	15.6972	13.4722	13.5572	13.2334	14.6059	15.4415	13.8782	13.9033	15.7377	12.8179	14.1445	13.7705	14.72
11_GL0109256	14.5153	13.8275	14.1001	13.1026	NA	12.9307	11.9044	13.7536	13.2727	13.5304	13.6864	14.1019	12.7284	NA	NA	12.5533	13.597	12.6888	12.7157	14.006	12.2887	12.5988	12.4247	13.1738
1-1_GL0109952;16_GL0108906	NA	NA	NA	NA	12.8556	11.0117	NA	11.0354	10.6652	11.0701	10.2525	10.35	14.7309	12.9517	13.3874	9.51326	14.661	11.5379	12.1517	NA	13.166	12.3153	11.7103	10.0043
1-1_GL0109952;16_GL0108906;17_GL0058712;32_GL0020888;5-8_GL0039556;7-5_GL0045935;MC-6-1_GL0007395;MC-6-5_GL0005472;MH-6-4_GL0047256;MH-6-4_GL0055674;S-Fe20_GL0193983;S-Fe2_GL0039090	14.169	14.6877	13.8618	15.103	15.6368	15.6418	15.48	15.4291	15.1073	14.2968	15.2698	15.705	14.4811	15.7487	15.9178	15.3339	16.0809	15.6066	15.3232	14.8265	15.8585	15.776	13.8814	15.2444
1-1_GL0109952;17_GL0058712;MC-6-1_GL0007395;MC-6-5_GL0005472;MH-6-4_GL0055674	NA	NA	NA	NA	NA	NA	NA	NA	NA	NA	NA	8.57638	9.86501	NA	NA	NA	NA	NA	NA	NA	9.6335	NA	NA	NA
1-1_GL0109952;MH-6-4_GL0055674	11.2234	NA	NA	12.7908	13.1015	12.8886	12.9123	12.1269	12.9406	12.6346	11.6029	12.0029	12.7574	12.8752	13.1745	13.4046	13.1371	13.2672	12.439	12.1818	14.0649	14.1325	12.9048	12.4149
1-1_GL0109952;MH-6-4_GL0055674;S-Fe7_GL0249715	NA	NA	NA	11.3341	11.462	NA	11.0583	12.1945	NA	NA	NA	NA	11.0924	11.1921	12.6369	NA	11.1511	10.3084	10.6699	NA	11.6293	12.5184	10.7847	NA
1-1_GL0110149	13.6859	14.2874	14.4274	13.9308	12.4005	12.2041	11.0699	12.8617	12.4647	11.8518	13.6075	11.8994	12.7613	12.2044	13.4466	11.6122	12.7114	NA	14.0452	12.1275	12.6524	13.7304	13.1067	NA
1-1_GL0110149;1-1_GL0146614;1-8_GL0016906;10_GL0100485;11_GL0028522;1A-dyr2-07_GL0049869;1_GL0021401;25_GL0015924;4-3_GL0015732;4-6_GL0099736;4-7_GL0090713;5-7_GL0063732;5-7_GL0083911;6-1_GL0074586;6-3_GL0116019;6-4_GL0107221;7-7_GL0030347;8-1_GL0083080;8-5_GL0050759;G1-5A_GL0199126;Group2-4A_GL0123968;MC-0-1_GL0010185;MC-0-3_GL0053589;MC-6-2_GL0065579;MH-6-2_GL0021116;MH-6-3_GL0075476;MH-6-5_GL0…	NA	NA	NA	NA	NA	NA	NA	13.0868	NA	NA	NA	NA	14.4349	NA	NA	NA	NA	NA	NA	NA	12.4566	NA	NA	NA
1-1_GL0110149;20_GL0098266;S-Fe10_GL0098636;S-Fe7_GL0278252;S-Fe9_GL0065104	17.5989	15.5181	16.9062	16.533	17.9339	17.2299	17.6289	17.5918	16.7551	14.7819	17.5493	NA	17.4146	NA	18.5869	16.3858	15.6584	NA	17.2276	15.0028	16.1913	NA	16.8883	15.5962
1-1_GL0110149;MC-0-1_GL0010185;MC-0-3_GL0053589	15.6024	16.8349	16.5182	16.1295	14.71	14.3277	13.2926	14.2027	14.985	13.5783	17.1028	14.1055	16.3362	14.7653	15.7103	13.4171	15.2602	13.6213	16.8793	14.7857	15.4214	15.6175	15.1763	NA
1-1_GL0110149;MC-0-1_GL0010185;MC-0-3_GL0053589;MH-6-2_GL0021116	15.0042	15.932	16.0723	15.5302	13.8814	13.3755	NA	13.3967	14.0927	NA	15.6589	13.2505	14.8168	14.0256	14.9554	12.9	14.528	12.714	15.3445	14.0047	14.4676	14.8397	14.2159	NA
1-1_GL0110149;MH-6-2_GL0021116	NA	11.3774	NA	NA	NA	NA	NA	NA	NA	NA	NA	NA	NA	NA	NA	NA	NA	NA	12.5134	NA	NA	NA	NA	NA
1-1_GL0110379	15.4369	15.6646	14.7131	15.4846	15.8893	16.0797	15.8823	15.4079	17.5969	13.7696	15.6675	15.1603	18.1811	15.8959	16.6624	15.4655	14.2975	15.6644	16.3671	15.6484	17.2538	15.5347	13.4009	13.575
1-1_GL0110379;1-3_GL0065887;1-7_GL0013214;11_GL0057177;1A-dyr2-07_GL0033923;1B-dyr11-07_GL0013533;23_GL0107287;25_GL0045379;2A-dyr16-06_GL0005863;37_GL0000145;4-1_GL0066005;49_GL0044821;54_GL0144303;G1-1A_GL0076443;G1-1A_GL0086502;MC-0-1_GL0060585;MC-0-3_GL0049463;MC-0-3_GL0094095;MC-6-1_GL0012537;MC-6-2_GL0057197;MH-6-4_GL0087399;S-Fe10_GL0029625;S-Fe10_GL0098442;S-Fe11_GL0089088	NA	NA	NA	NA	NA	NA	NA	15.9461	NA	NA	NA	16.4012	15.6098	NA	NA	NA	NA	NA	NA	NA	15.0356	NA	15.5008	NA
1-1_GL0110379;1-3_GL0065887;54_GL0144303;MH-6-4_GL0087399	13.5741	13.8693	14.3585	14.8249	15.2174	15.4467	14.2891	14.1869	14.1495	NA	14.0134	13.188	16.6141	15.2346	16.249	14.2786	13.0112	NA	15.4334	13.4672	14.712	16.1757	13.4122	12.5291
1-1_GL0110595	11.6143	NA	NA	11.4839	13.2212	12.8087	12.5172	13.3973	13.1704	11.9403	11.6783	12.2378	12.3702	13.1137	13.2537	12.8287	12.5303	13.115	12.5884	12.0848	12.1211	12.713	12.8361	12.9189
1-1_GL0110595;2-6_GL0080553	NA	NA	NA	NA	13.941	13.8755	12.7812	13.4514	13.4672	16.3582	13.4921	12.7163	14.1174	13.3391	13.9585	12.4211	13.682	12.9011	13.6093	12.7927	13.0932	12.3529	13.3828	12.5312
1-1_GL0110655	14.3048	14.8771	14.3685	13.8141	14.2039	14.5126	16.1135	14.9584	16.7669	15.9336	15.339	13.0853	12.4697	14.5549	12.5915	16.5572	13.885	14.5888	14.6851	14.0158	16.6468	15.4072	NA	NA
1-1_GL0110655;17_GL0160550;MH-6-1_GL0097407;MH-6-2_GL0028666	15.2957	17.3489	16.3207	16.5639	17.4742	16.8809	16.968	16.3539	17.4651	17.0138	16.885	17.3438	17.0666	17.6725	16.3157	17.3873	17.4547	17.4445	16.4575	16.2077	18.9148	19.4522	17.6584	16.8404
1-1_GL0110655;MH-6-1_GL0097407	13.8546	15.0152	13.5573	13.1984	14.2183	14.3298	15.5316	14.4004	15.3181	14.822	14.7786	12.2092	14.5703	14.3106	12.259	NA	NA	13.0391	NA	NA	13.6483	12.643	14.2403	14.878
1-1_GL0111475	NA	9.67868	11.6002	NA	10.3767	11.0047	NA	10.403	11.368	NA	9.78935	NA	10.1935	9.80326	10.8177	NA	12.2419	10.745	11.1486	NA	10.6576	NA	NA	NA
1-1_GL0111479;37_GL0013375;40_GL0077841	NA	10.7482	12.3831	NA	12.9446	14.3686	NA	13.12	12.646	11.4958	NA	NA	11.328	13.0248	11.9972	NA	14.5631	12.3416	13.0298	NA	11.6913	NA	NA	12.3651
11_GL0111645	NA	NA	14.4104	13.8494	14.6726	15.1107	16.0295	15.2346	NA	NA	NA	NA	12.3512	14.7719	12.2619	15.9713	NA	13.7111	13.4122	14.1044	13.6571	14.7875	16.3015	13.1208
11_GL0111645;1A-dyr4-07_GL0006102;1A-dyr4-07_GL0007893;1A-dyr5-06_GL0013397;2-1_GL0010887;2-1_GL0051898;2-1_GL0096566;2-3_GL0084511;3-1_GL0095819;5-7_GL0130672;6-4_GL0023264;Group2-2A_GL0059999;S-Fe20_GL0183304	NA	NA	NA	NA	14.8586	NA	NA	NA	NA	NA	NA	NA	NA	14.673	14.745	12.0646	13.3858	NA	NA	NA	NA	NA	NA	11.3219
11_GL0111645;1A-dyr4-07_GL0006102;1A-dyr4-07_GL0007893;S-Fe20_GL0183304	NA	NA	NA	NA	11.6521	13.3213	NA	NA	NA	NA	NA	NA	12.4983	12.673	12.6865	10.9882	12.4112	NA	12.5456	NA	11.6275	13.0288	NA	11.3059
11_GL0111645;1A-dyr5-06_GL0013397;5-7_GL0130672;6-4_GL0023264;S-Fe20_GL0183304	13.8925	12.7618	12.8518	13.5114	15.3294	14.9285	16.1355	15.2222	14.8313	12.1449	15.0444	14.438	15.2216	15.0166	15.6642	14.8542	14.0582	15.6338	15.5759	14.8964	15.1261	14.9549	14.9382	14.237
11_GL0111646	NA	NA	12.47	NA	12.8823	12.5567	13.7649	13.6521	NA	NA	11.2035	11.3682	11.6729	12.9401	NA	14.4451	NA	12.2616	12.3353	12.515	12.3322	12.0058	14.4219	NA
11_GL0111646;2-1_GL0010886;2-1_GL0051897;2-1_GL0096565;2-3_GL0084512;3B-dyr36-06_GL0058943;6-4_GL0014602;G1-8A_GL0047995;Group2-2A_GL0060000;Group2-3A_GL0194212	NA	NA	11.202	NA	12.6095	NA	12.3498	NA	11.9763	NA	NA	NA	13.3062	12.3234	12.9251	12.5155	12.7274	13.0647	NA	NA	13.3443	NA	12.8621	11.1113
11_GL0111646;2-1_GL0010886;2-1_GL0051897;2-1_GL0096565;2-3_GL0084512;G1-8A_GL0047995	NA	NA	NA	NA	NA	NA	NA	13.2378	NA	NA	NA	NA	NA	NA	NA	NA	NA	NA	NA	NA	NA	NA	NA	NA
11_GL0111646;2-1_GL0096565;2-3_GL0084512;G1-8A_GL0047995	13.009	NA	11.5231	NA	13.8059	13.1415	15.0957	12.7051	12.1046	NA	13.0791	14.1232	13.3983	14.6094	9.6997	12.4981	12.9904	11.8986	14.5199	14.2866	13.4562	11.341	12.7377	12.2266
1-1_GL0111801;11_GL0106920;17_GL0063405;17_GL0083926;17_GL0130412;1_GL0095036;2-1_GL0087638;2-2_GL0129598;2-4_GL0006265;2-4_GL0077588;2-5_GL0020291;20_GL0054153;2A-dyr14-07_GL0067403;2B-dyr19-06_GL0030526;6-6_GL0028101;G1-6A_GL0018298;G1-8A_GL0100514;Group2-4A_GL0127595;Group2-6A_GL0076595	16.2868	14.5242	15.8587	14.7712	16.4011	17.0914	13.5025	NA	16.0203	15.2637	15.8629	NA	NA	16.501	14.5331	16.8428	16.5226	NA	14.6816	16.0203	NA	NA	17.2333	16.1122
1-1_GL0111801;1-3_GL0083931;2-1_GL0089701;2B-dyr19-06_GL0030526	11.1484	12.5782	13.6699	11.25	13.403	12.7482	NA	12.9826	13.7353	11.9117	12.6136	11.9693	14.4998	13.4314	12.5929	11.6425	14.1452	13.6341	13.5936	13.1912	12.4672	NA	12.2745	13.9668
1-1_GL0111801;2B-dyr19-06_GL0030526	NA	NA	NA	NA	NA	NA	NA	13.3711	14.0303	NA	NA	14.1698	13.0413	NA	NA	NA	NA	NA	NA	NA	14.1896	NA	11.7538	NA
1-1_GL0111812	10.8085	12.4243	13.1037	NA	12.6804	13.6926	NA	12.46	13.6364	NA	11.8397	NA	12.0709	12.6131	12.0615	NA	14.0436	11.7953	14.496	11.3975	13.8262	NA	NA	12.1598
1-1_GL0111812;4-2_GL0041327;5-1_GL0073769;7-1_GL0009368;G1-2A_GL0010340;S-Fe8_GL0195568	NA	NA	NA	NA	14.5814	NA	NA	NA	13.2839	NA	NA	13.1709	13.8835	14.304	13.0676	11.8839	13.4078	NA	14.2009	NA	13.2397	NA	NA	11.7942
1-1_GL0111814	12.4137	13.4136	14.3686	NA	14.9699	14.8537	13.6013	14.1226	14.2441	12.271	14.0541	14.2676	14.8953	15.0513	13.8894	14.3987	14.7566	13.9552	15.5907	14.2956	15.4962	14.3041	NA	13.5639
1-1_GL0111814;11_GL0139734;17_GL0030922;17_GL0081250;1A-dyr4-07_GL0050573;2-1_GL0009421;2-1_GL0087625;2-1_GL0109056;20_GL0156837;2_GL0033129;3-5_GL0058228;4-2_GL0102618;6-3_GL0040209;6-6_GL0069165;7-8_GL0055322;G1-2A_GL0031495;G1-7A_GL0073967;Group2-3A_GL0028219;Group2-4A_GL0033622;S-Fe20_GL0027213	14.6002	14.4236	14.2906	14.7016	14.797	15.7032	14.7658	NA	14.5954	14.299	14.9966	14.8129	14.9778	14.7423	14.9363	15.0935	14.5466	14.7458	15.0344	15.0501	14.6023	15.5948	14.3337	13.8562
1-1_GL0111814;11_GL0139734;3-5_GL0058228	NA	NA	NA	NA	NA	11.7152	NA	NA	NA	NA	NA	NA	12.3295	NA	11.6447	NA	NA	NA	12.4693	NA	NA	NA	NA	NA
1-1_GL0111814;3-5_GL0058228	13.5781	NA	NA	NA	NA	NA	NA	NA	NA	13.3498	NA	NA	NA	NA	16.1258	NA	NA	NA	NA	NA	NA	NA	NA	NA
1-1_GL0111814;3-5_GL0058228;6-6_GL0069165;Group2-3A_GL0028219	16.3142	15.3399	15.5024	15.405	17.4203	16.7429	16.6208	16.1262	16.5204	15.3791	16.7297	NA	18.1285	17.5138	17.0556	16.9089	16.961	16.7999	17.9558	16.9768	17.399	16.5816	16.2883	16.4467
1-1_GL0112147	10.8587	13.3157	NA	12.2564	15.02	14.0216	NA	13.7717	13.8047	NA	13.0152	12.8104	16.3626	14.7528	14.9337	NA	13.0726	13.9509	15.4834	13.8507	15.7906	14.2526	13.0082	NA
1-1_GL0112147;11_GL0052466;2-2_GL0107972;23_GL0077745;26_GL0056783;2A-dyr14-07_GL0059822;4-1_GL0033815;4-1_GL0039810;4-7_GL0146230;4-8_GL0047587;7-1_GL0073646	NA	16.0863	14.0984	14.8617	13.8495	NA	14.9209	NA	NA	12.4315	NA	NA	NA	14.0677	14.0707	13.4092	13.1597	13.9523	15.0622	NA	NA	NA	NA	15.1799
1-1_GL0112147;11_GL0052466;2-2_GL0107972;23_GL0077745;26_GL0056783;2A-dyr14-07_GL0059822;4-1_GL0033815;4-8_GL0047587;7-1_GL0073646	13.4681	12.4653	NA	13.5869	13.4522	11.869	14.9968	NA	NA	10.513	13.4193	NA	NA	13.7243	14.6023	12.9602	11.0971	14.0105	14.6254	13.656	NA	13.2112	NA	11.6367
1-1_GL0112147;1-3_GL0031341;1-3_GL0118280;23_GL0123068;26_GL0009909;Group2-8A_GL0108082	12.284	11.7869	11.7344	11.124	14.0561	12.5064	11.3276	NA	NA	NA	12.0602	NA	14.9072	14.2304	13.2457	NA	11.6571	13.0463	14.251	14.0308	14.9955	NA	NA	11.2281
1-1_GL0112147;1-3_GL0118280	NA	NA	NA	10.7055	12.3719	11.7963	12.3539	11.2124	NA	10.9833	11.12	11.8928	11.8731	12.4562	11.9277	NA	NA	12.4597	NA	NA	NA	11.9767	11.3628	11.7411
1-1_GL0112329;2-1_GL0078929;3-6_GL0069541;MH-6-4_GL0004541;S-Fe1_GL0183669;S-Fe20_GL0119590	11.6418	9.94258	NA	10.4651	11.9821	10.6596	11.87	NA	11.347	NA	10.6607	NA	12.4155	11.9637	10.6153	9.95683	11.2068	11.3993	12.2242	11.4845	12.0542	12.0251	NA	NA
1-1_GL0112601;2-1_GL0013830;26_GL0060917;2_GL0078533;4-1_GL0012842;4-2_GL0105915;4-3_GL0028320;5-2_GL0004611;5-8_GL0000019;6-2_GL0015660;6-4_GL0046841;7-8_GL0040923	12.5871	12.6387	12.981	11.3813	14.688	12.5831	13.2676	13.1189	13.8492	13.7097	13.4716	13.5309	15.2651	14.8403	11.505	13.5641	13.4886	13.2375	15.3544	14.2913	15.3101	13.4366	12.4868	12.5351
11_GL0112834	NA	NA	NA	11.3421	13.5751	11.9337	14.6553	11.9137	12.2964	10.3564	14.0083	12.9799	14.3147	13.6022	12.1921	12.634	12.8672	14.2711	13.8184	12.265	14.5344	11.132	13.5935	12.5622
11_GL0112834;1A-dyr4-07_GL0071917;S-Fe9_GL0056616	NA	NA	NA	NA	13.1876	NA	15.0908	13.3194	NA	NA	NA	12.9624	13.3566	13.1439	NA	NA	NA	NA	NA	NA	14.1409	12.9759	12.7982	11.6277
11_GL0112834;S-Fe9_GL0056616	NA	NA	NA	9.9827	12.3086	11.8914	12.5066	10.0391	NA	NA	11.4027	11.4195	12.6964	12.6815	10.3965	NA	11.317	NA	12.9006	11.3372	13.1097	NA	NA	NA
1-1_GL0113093	15.5568	16.298	16.0993	16.1272	14.8605	14.8598	13.359	15.0505	14.6466	13.0936	15.754	13.9844	14.8916	14.8654	15.3122	14.0134	15.0045	13.7085	15.6145	14.8871	14.2705	15.5774	14.6903	12.6731
1-1_GL0113093;28_GL0066492	15.4381	16.4273	16.3143	16.4611	15.0676	15.1918	NA	15.1708	14.972	13.8515	15.8353	14.3431	15.1664	15.3356	15.9077	14.6799	15.2928	14.6216	15.7875	15.3922	15.6525	15.8006	15.562	13.0476
1-1_GL0113093;28_GL0066492;S-Fe10_GL0009972	17.4504	18.624	18.3713	18.7386	17.3864	17.4047	15.6705	17.5335	17.0451	15.592	17.7219	16.3946	17.4573	17.5102	17.8991	16.8856	17.2922	16.4401	17.4796	16.8215	17.242	17.6196	17.2152	15.5108
1-1_GL0113093;S-Fe10_GL0009972	17.2826	18.8677	18.62	19.1529	NA	17.7395	15.8525	18.3464	17.2211	16.414	17.6654	16.5752	17.3502	NA	NA	16.7448	17.4215	NA	17.3462	16.7447	17.7395	17.8225	17.0577	16.2662
11_GL0113823	NA	NA	NA	NA	14.5807	NA	NA	NA	NA	NA	NA	NA	16.3403	14.5483	13.7961	15.2048	NA	NA	NA	NA	NA	16.3026	16.74	NA
11_GL0113823;1A-dyr4-07_GL0046736;2A-dyr16-06_GL0019187;4-1_GL0080461;4-8_GL0049517;Group2-1A_GL0083556	NA	NA	NA	NA	NA	NA	NA	15.2083	NA	NA	NA	NA	NA	NA	NA	NA	NA	NA	NA	NA	NA	NA	NA	NA
11_GL0113823;2A-dyr16-06_GL0019187;4-8_GL0049517	NA	12.6662	12.5377	13.8778	14.5235	15.5373	NA	15.1152	14.8122	12.6865	NA	NA	15.1283	14.618	14.5175	12.7036	16.7736	14.289	14.5188	NA	14.8802	11.2234	12.2804	13.2568
11_GL0113823;2A-dyr16-06_GL0019187;4-8_GL0049517;7-5_GL0120767	NA	13.7805	15.3247	14.3349	15.095	14.1122	14.3442	NA	15.5112	14.9444	13.5495	17.6799	15.3927	15.0952	15.4167	15.9668	17.0113	15.7143	15.115	16.2408	14.8529	13.5453	16.6429	18.2357
11_GL0113823;5-2_GL0098440	NA	NA	NA	NA	11.8709	12.2041	NA	12.3014	NA	12.2806	NA	NA	12.6119	11.5837	NA	13.0833	11.3047	NA	10.7334	NA	11.7089	13.5038	NA	NA
1-1_GL0114159	13.8247	14.6916	14.2268	13.8798	15.3484	17.2972	13.3523	16.7756	15.8149	13.7857	13.9399	12.764	14.4038	15.2939	15.219	13.9471	15.8445	13.8258	15.5004	14.5554	14.7495	14.6403	14.2791	14.2105
1-1_GL0114166	13.439	12.3775	13.4862	13.4437	14.8419	14.9218	15.4667	13.0187	14.5974	13.962	13.6021	14.5768	14.8878	14.8381	14.2168	13.401	14.3774	14.4247	14.4107	13.5899	15.1254	15.4376	13.5148	13.8682
1-1_GL0114307	NA	NA	12.0527	NA	12.5023	NA	NA	NA	12.846	NA	NA	NA	NA	12.4193	NA	NA	14.4478	NA	NA	NA	NA	NA	NA	NA
1-1_GL0114307;26_GL0100613	14.4057	13.896	15.7297	14.6162	15.3735	16.5621	15.891	15.4661	16.4664	15.2145	15.4079	15.2745	15.4545	15.1893	15.1926	14.3615	16.2618	14.3005	15.6602	14.0119	14.0437	13.8007	12.7526	14.3819
1-1_GL0114307;26_GL0100613;35_GL0089920;8-3_GL0058401;Group2-3A_GL0113560	16.0546	14.9809	16.0001	15.7802	16.8508	17.2447	17.9276	16.029	16.5554	16.0642	17.0123	16.3499	16.6822	16.7769	16.8731	16.5122	16.6364	16.0907	16.9607	15.865	15.454	13.6609	15.5759	15.0857
1-1_GL0114307;26_GL0100613;8-3_GL0058401;Group2-3A_GL0113560	15.3886	14.4204	15.9185	15.536	16.4374	17.0139	17.137	16.1839	16.5288	16.1089	17.0332	16.1701	16.6275	16.5212	16.657	15.1185	17.0569	15.6774	16.8945	15.4696	15.232	14.013	14.7097	15.2047
1-1_GL0114307;26_GL0100613;Group2-3A_GL0113560	11.8081	11.878	12.1963	12.9634	12.8971	13.5783	13.0548	12.7482	12.9357	11.6413	12.5481	12.1536	12.6842	13.2866	NA	11.5995	13.3789	10.8176	12.7752	10.6406	11.689	10.9025	10.5041	11.7706
1-1_GL0114553	NA	13.4955	NA	14.5009	14.0967	14.8558	13.7625	13.2673	NA	NA	14.1209	NA	15.3946	14.3749	15.0227	13.43	NA	NA	13.732	13.1979	14.9892	15.5942	13.0815	13.005
1-1_GL0114553;1A-dyr2-07_GL0033201;1A-dyr4-07_GL0084324	NA	9.67033	NA	NA	10.5423	11.4948	NA	11.516	NA	NA	NA	NA	11.3215	NA	11.823	NA	10.0614	NA	NA	10.6151	11.1806	11.4244	NA	NA
1-1_GL0114553;1A-dyr4-07_GL0084324;47_GL0140415;8-5_GL0025241	15.9576	14.4992	15.9509	15.8938	17.0344	17.6384	17.7005	15.5432	16.1575	15.7181	16.9585	16.5745	17.4067	17.2969	17.7332	14.9412	15.5537	16.6434	16.0215	16.2063	16.9407	16.3882	15.169	15.917
1-1_GL0114553;2A-dyr16-07_GL0005642	12.668	11.9833	10.5031	12.6238	14.1851	14.7848	14.3275	13.6516	13.7162	12.4088	13.9607	12.3919	15.5627	14.4046	15.1424	14.0088	13.3913	13.9516	14.3042	13.9265	14.7501	14.8822	13.9111	14.4119
1-1_GL0114553;47_GL0140415;8-5_GL0025241;Group2-8A_GL0001260;S-Fe20_GL0093830	10.8841	12.2073	10.6437	12.4594	13.4725	13.9525	13.1375	12.7585	12.2628	9.78647	13.218	9.84553	14.6809	13.2093	14.1983	12.5344	12.0967	11.4965	13.991	12.3093	14.0029	14.4731	10.5557	11.0005
1-1_GL0114553;47_GL0140415;8-5_GL0025241;S-Fe20_GL0093830	13.4907	14.4467	13.4064	14.8456	15.6776	16.1729	14.643	14.7529	13.739	NA	15.2418	NA	16.9487	15.6705	16.1656	14.6253	13.0337	12.7293	15.5156	14.1187	16.2725	16.5135	13.1456	13.0642
11_GL0114595;1A-dyr4-07_GL0067446;5-4_GL0123428;6-2_GL0072779	13.0439	NA	11.4117	NA	12.9845	13.1061	13.5937	12.7828	12.999	NA	12.6463	12.1595	13.7801	12.9404	13.44	13.0347	12.7066	12.4352	13.6384	12.7103	13.9064	14.3514	13.0648	11.6359
1-1_GL0114862	NA	NA	NA	NA	13.2915	NA	NA	NA	NA	NA	NA	NA	NA	13.1429	NA	13.8138	NA	NA	13.4467	NA	NA	14.1137	NA	NA
1-1_GL0114862;3-5_GL0002451;S-Fe2_GL0161391	12.2301	NA	NA	NA	14.0602	14.0523	14.3801	13.9247	14.1391	NA	NA	NA	15.4241	14.4196	14.6813	NA	13.0198	12.9278	14.1877	13.247	14.5877	14.7354	12.217	NA
1-1_GL0114862;S-Fe2_GL0048785	11.3041	NA	11.5685	10.5797	14.3432	13.0195	13.2253	NA	12.4459	NA	12.6463	NA	15.3882	14.4009	13.5969	11.9969	NA	NA	14.8081	NA	13.9834	13.4242	NA	10.437
1-1_GL0115142;16_GL0053834;2-1_GL0095016;6-2_GL0036740;G1-5A_GL0042635;S-Fe12_GL0080716	17.8186	NA	15.0141	NA	16.4008	16.2208	17.6997	NA	16.165	NA	16.0177	17.5609	NA	16.4849	16.7498	15.9911	15.3107	16.9283	NA	17.6461	NA	NA	NA	16.1453
1-1_GL0115232;1-1_GL0125549;1-2_GL0048689;34_GL0017243	11.4911	12.9857	NA	12.8592	13.9119	13.5832	13.637	13.6444	13.1672	12.8073	12.8515	12.5887	13.9871	13.8363	14.2133	13.3837	13.1524	13.6462	13.7111	12.8451	13.5386	14.1107	13.3209	12.8778
1-1_GL0115232;1-1_GL0125549;1-2_GL0048689;34_GL0017243;G1-1A_GL0096895	13.2281	13.842	14.2513	14.4182	15.8071	15.0587	15.8015	14.9635	15.2562	14.3733	14.6079	14.4673	15.2465	15.7884	14.3494	15.7629	15.6317	15.3061	15.3945	14.6639	15.831	12.7281	14.8021	14.2424
1-1_GL0115232;34_GL0017243	NA	NA	10.1013	NA	NA	12.5845	NA	NA	12.6686	NA	NA	NA	NA	11.3171	NA	NA	13.2724	NA	12.2633	NA	NA	NA	NA	NA
1-1_GL0115262;MC-0-1_GL0067332;MC-6-2_GL0016725;MC-6-3_GL0035939;S-Fe10_GL0010008	14.3468	15.4708	14.7764	16.1504	14.5763	15.1704	13.3234	14.7417	14.7003	14.9492	15.5555	14.0444	14.6033	14.7553	13.7427	14.7448	14.6086	14.107	15.1641	14.5851	14.8471	14.5999	14.0785	13.5975
1-1_GL0115262;MC-0-1_GL0067332;MC-6-2_GL0016725;S-Fe10_GL0010008	13.4884	15.0576	14.789	15.6293	13.8061	15.0233	12.7717	14.5234	13.9712	13.993	14.1962	13.582	13.7838	13.8495	13.6482	13.8636	14.6739	13.6752	14.3533	13.6947	13.5069	13.4568	13.7611	13.424
1-1_GL0115270	16.4795	19.069	18.0088	19.8211	17.2681	18.9142	17.0453	18.3952	16.9293	18.0387	17.3603	16.8747	16.6632	17.2966	16.1313	16.1968	17.3468	17.7182	17.1614	16.9476	16.6373	16.6785	16.9156	16.7201
1-1_GL0116050;19_GL0086251;S-Fe10_GL0170082	15.2538	14.482	15.3771	15.4748	13.9792	13.8883	12.9378	13.3158	13.5935	12.2701	14.1184	10.9003	13.9774	14.1527	14.4922	13.1639	14.0023	12.5661	13.8672	13.3924	13.0429	14.0489	13.492	11.2146
1-1_GL0116050;S-Fe10_GL0170082	13.135	13.1649	14.7185	13.4516	12.0559	13.1532	NA	NA	12.3031	NA	12.6677	11.5162	12.7757	12.3238	12.7876	NA	NA	11.4811	12.3028	11.7171	NA	12.8557	11.8256	NA
1-1_GL0116892	NA	NA	NA	NA	NA	NA	NA	NA	NA	NA	NA	NA	NA	NA	NA	NA	15.1586	NA	NA	NA	NA	NA	14.2706	NA
1-1_GL0117012	14.0052	14.7079	13.6517	13.8416	11.5832	13.1487	10.5832	12.1001	NA	12.3681	12.9909	NA	NA	NA	12.1917	NA	13.8034	10.9808	13.7245	NA	NA	NA	12.835	NA
1-1_GL0117261	NA	NA	NA	9.44592	NA	NA	NA	NA	NA	NA	NA	NA	NA	NA	NA	NA	NA	NA	NA	NA	NA	NA	NA	NA
1-1_GL0117261;8-2_GL0048878;G1-3A_GL0125811;S-Fe18_GL0057346	15.9084	14.8703	16.159	15.1902	16.6485	16.4839	17.1687	16.822	16.3818	16.1531	16.2417	16.1385	16.2056	16.6373	16.1461	15.5328	16.986	17.4146	16.187	16.0682	16.1171	15.2816	16.6253	15.2766
1-1_GL0117261;G1-3A_GL0125811	11.2789	11.8484	NA	13.1066	12.5635	12.5258	14.1886	11.0892	12.6531	11.9799	NA	NA	11.3066	12.5426	NA	11.9284	12.8402	11.1871	NA	NA	13.8237	11.921	11.6318	NA
11_GL0117532	NA	NA	NA	NA	NA	NA	NA	NA	NA	NA	NA	NA	NA	NA	11.4006	NA	NA	NA	NA	NA	13.2858	NA	NA	NA
11_GL0117532;1A-dyr4-07_GL0109899	NA	NA	NA	NA	14.0341	NA	NA	NA	NA	NA	NA	NA	14.3308	14.1502	15.0692	NA	15.2057	15.3926	NA	NA	16.4199	NA	NA	NA
11_GL0117532;1A-dyr4-07_GL0109899;5-8_GL0093753	NA	NA	11.4035	NA	13.4194	NA	NA	NA	13.6981	13.443	NA	NA	13.4828	13.4402	12.9027	12.0782	14.1222	13.0316	11.5507	13.0058	14.6636	12.8108	NA	NA
11_GL0117532;4-7_GL0037278;S-Fe20_GL0034113	9.9643	10.0387	NA	10.3414	12.3513	11.9475	12.2066	12.0386	10.2301	NA	11.1398	NA	14.0001	12.7569	13.6248	12.3826	12.0386	11.6918	11.9862	10.6637	13.3938	11.5932	12.5197	NA
1-1_GL0117667	NA	13.0824	13.3864	13.0394	NA	12.7165	NA	13.2746	13.2109	NA	13.4209	13.2144	12.1145	NA	NA	NA	NA	NA	13.3637	13.1554	12.5856	13.7951	12.1201	NA
1-1_GL0117667;S-Fe10_GL0031034	15.5773	16.4625	17.5007	16.7421	14.8858	NA	13.5407	15.0984	14.5726	13.941	15.9314	14.4033	14.5466	14.7862	13.9995	14.5701	16.2212	NA	15.4368	14.7219	14.1108	14.7575	14.3506	13.5813
11_GL0117849	14.1576	15.4648	13.4167	13.2276	11.9052	11.2762	12.2897	14.0519	10.3752	11.0348	14.641	13.9377	13.5237	12.0259	13.4729	13.1761	14.1481	12.6913	14.3247	14.2567	13.1879	12.4764	14.8633	13.5864
1-1_GL0117864	NA	NA	NA	NA	NA	10.641	NA	9.94839	10.41	NA	NA	NA	NA	9.41957	NA	NA	9.82225	NA	NA	NA	NA	NA	NA	NA
1-1_GL0117864;5-4_GL0079130	NA	12.2027	11.9051	12.3087	12.8958	13.2731	NA	12.8325	13.2692	9.88135	12.849	12.1306	12.9682	12.6995	12.6551	12.5457	13.6026	12.5022	13.7507	12.442	13.7145	NA	NA	11.9601
1-1_GL0117868	13.7463	15.4166	16.3943	14.718	16.827	17.1175	13.1303	16.8192	17.7234	14.9408	16.2192	15.8523	16.3502	16.8757	15.9223	15.9705	17.8258	16.6779	17.123	15.2519	16.2126	NA	16.3368	16.1047
1-1_GL0117882	NA	NA	NA	NA	NA	12.4206	NA	NA	NA	NA	NA	NA	NA	NA	NA	NA	NA	11.2332	12.2852	NA	NA	NA	NA	NA
11_GL0118584	NA	13.3256	NA	13.0655	13.7939	15.5234	14.2365	12.7709	12.5737	13.986	NA	NA	13.2951	13.8577	13.9825	14.5101	NA	NA	NA	12.6168	13.9473	14.7319	13.7238	12.3464
11_GL0118584;6-6_GL0018712	NA	NA	NA	NA	NA	NA	NA	12.4607	NA	NA	NA	NA	12.5335	NA	NA	NA	NA	NA	NA	NA	NA	NA	12.7975	NA
1-1_GL0118687	NA	NA	NA	NA	9.37106	NA	NA	NA	NA	NA	NA	NA	NA	NA	10.3398	NA	NA	NA	NA	NA	NA	NA	NA	NA
1-1_GL0118687;1-3_GL0015145;10_GL0048655;11_GL0028482;11_GL0128752;19_GL0043319;1A-dyr4-07_GL0081851;2-1_GL0042309;2-1_GL0047991;2-1_GL0055223;2-1_GL0106619;2-1_GL0110700;2-2_GL0055485;2-2_GL0119514;2-2_GL0131240;2-2_GL0151691;2-3_GL0051869;2-8_GL0056240;20_GL0041194;20_GL0131076;2A-dyr14-06_GL0053546;2_GL0058400;2_GL0109744;3-5_GL0002294;34_GL0009955;35_GL0053842;4-1_GL0043646;4-2_GL0119024;4-8_…	NA	NA	14.3618	NA	18.1298	18.4108	18.4193	17.7295	NA	15.1681	NA	NA	18.5758	18.2527	18.8922	NA	18.4211	NA	19.3844	NA	18.4831	18.6158	16.4812	10.9794
1-1_GL0118687;1A-dyr4-07_GL0019666;1A-dyr4-07_GL0081851;2_GL0109744;5-7_GL0138952;8-4_GL0073668;G1-6A_GL0013373;S-Fe20_GL0027198	14.6646	15.3399	15.3764	15.2794	17.3411	17.9103	18.3962	17.1029	16.8525	14.1929	16.9213	16.84	16.5944	17.4601	17.416	16.1857	16.9048	17.8753	17.08	16.4621	16.2368	17.2561	16.1562	16.9332
1-1_GL0118687;1A-dyr4-07_GL0019666;1A-dyr4-07_GL0081851;2-1_GL0042309;2-2_GL0151691;2_GL0109744;5-6_GL0009184;5-7_GL0138952;7-8_GL0086080;8-1_GL0112958;8-4_GL0073668;G1-5A_GL0086325;G1-6A_GL0013373;MC-6-2_GL0075820;S-Fe20_GL0027198;S-Fe9_GL0241485	17.8582	16.2722	16.8232	16.2195	18.3422	17.5559	19.0241	NA	18.2259	16.6533	17.9388	17.9827	17.5271	18.5203	18.558	17.1635	18.5684	17.982	18.2176	17.9568	18.8487	17.0204	17.3127	17.5267
1-1_GL0118687;1A-dyr4-07_GL0019666;1A-dyr4-07_GL0081851;2-2_GL0151691;2A-dyr14-06_GL0053546;2_GL0109744;5-6_GL0009184;5-7_GL0138952;6-5_GL0043846;8-1_GL0116806;8-4_GL0073668;G1-5A_GL0086325;G1-6A_GL0013373;Group2-8A_GL0097846;S-Fe20_GL0027198;S-Fe9_GL0241485	18.1425	17.6702	17.6314	17.8362	19.6511	19.6507	20.5169	19.183	19.4283	17.856	19.5478	18.7416	19.7044	19.7834	19.8843	18.7206	19.2478	20.0723	19.8345	19.1501	19.1951	19.4706	18.4701	19.0969
1-1_GL0118687;1A-dyr4-07_GL0019666;1A-dyr4-07_GL0081851;2A-dyr14-06_GL0053546;2_GL0109744;5-6_GL0009184;6-5_GL0043846;8-1_GL0112958;8-4_GL0073668;G1-5A_GL0086325;Group2-8A_GL0097846;S-Fe20_GL0027198;S-Fe9_GL0044726;S-Fe9_GL0241485	13.851	13.7397	13.8237	13.6047	16.199	17.3304	16.8847	16.4973	15.8855	14.7341	15.2979	14.7488	16.6207	16.2006	17.1027	14.4887	16.3537	17.0527	16.7055	14.3298	15.9723	16.0611	15.0168	14.7394
1-1_GL0118942	12.782	11.4801	12.9712	NA	14.4871	13.2916	14.8022	13.5907	13.1201	NA	NA	NA	14.3772	14.4635	14.672	12.7516	13.2488	14.277	13.5456	NA	14.9314	NA	13.5378	12.8583
1-1_GL0119200;10_GL0024591;16_GL0015629;16_GL0018652;1A-dyr2-07_GL0025186;1B-dyr12-07_GL0014279;20_GL0118339;4-1_GL0047735;G1-1A_GL0002834;MC-0-1_GL0090921;MC-6-1_GL0012762;S-Fe10_GL0031283;S-Fe10_GL0130688	NA	NA	NA	NA	12.9602	13.8468	NA	13.9588	NA	NA	12.1967	NA	15.821	14.5855	NA	NA	13.7078	NA	NA	12.6775	13.6942	14.4959	13.6468	NA
1-1_GL0119200;1-1_GL0148995;10_GL0024591;16_GL0015629;16_GL0018652;1A-dyr2-07_GL0025186;1B-dyr12-07_GL0014279;20_GL0118339;28_GL0079362;4-1_GL0047735;G1-1A_GL0002834;MC-0-1_GL0090921;MC-6-1_GL0012762;S-Fe10_GL0031283;S-Fe10_GL0130688	15.5991	16.2133	15.9377	15.522	14.4879	14.3537	12.315	14.8771	NA	NA	15.7237	NA	NA	14.5037	14.8785	14.9419	14.2786	13.4197	13.6764	14.3463	NA	14.147	NA	NA
1-1_GL0119200;16_GL0018652;1A-dyr2-07_GL0025186;4-1_GL0047735;G1-1A_GL0002834;MC-0-1_GL0090921;MC-6-1_GL0012762;S-Fe10_GL0130688	15.9313	17.2529	16.745	16.972	15.8271	16.1034	13.4004	15.3557	15.0889	12.7903	16.0283	14.0057	16.3613	15.7907	16.8824	15.4047	15.0837	14.075	16.48	16.0154	16.4383	16.7547	15.7879	13.433
1-1_GL0119848	NA	NA	NA	11.4107	NA	NA	NA	NA	NA	NA	NA	NA	NA	NA	NA	NA	NA	NA	NA	NA	NA	NA	NA	NA
1-1_GL0119848;11_GL0143072;4-8_GL0080659;4-8_GL0096578;MC-6-2_GL0056622;S-Fe8_GL0277743	10.13	NA	9.95286	NA	11.8202	NA	NA	12.2357	NA	11.5048	NA	NA	NA	12.0274	12.1556	11.9539	11.7974	NA	NA	NA	12.5952	NA	11.8512	13.3973
1-1_GL0120097;1-1_GL0123965;17_GL0103254;20_GL0013814	NA	11.2109	NA	NA	12.9254	NA	NA	11.9324	NA	NA	NA	NA	12.3677	12.5825	13.3929	10.8896	NA	NA	NA	NA	12.6648	NA	NA	NA
1-1_GL0120097;1-8_GL0008708;20_GL0013814;2A-dyr16-07_GL0033426;8-3_GL0077504;MC-0-3_GL0014253;MH-6-5_GL0125619;S-Fe16_GL0040496;S-Fe7_GL0059132	11.3597	11.3484	11.0614	NA	11.6271	12.3023	11.5003	11.4787	11.654	NA	11.8348	NA	10.6836	11.8837	11.9259	11.4737	11.3525	10.4562	12.0615	10.9081	12.0581	12.8961	9.71002	11.171
1-1_GL0120097;1-8_GL0008708;2A-dyr16-07_GL0033426;8-3_GL0077504;MC-0-3_GL0014253;MH-6-5_GL0125619;S-Fe16_GL0040496;S-Fe7_GL0059132	13.9491	14.2352	NA	12.6976	13.8718	14.5253	13.9598	13.8337	13.7662	NA	13.7416	NA	13.3417	14.1217	14.2144	13.6977	14.2229	13.2837	14.0944	13.3009	14.2707	14.9191	NA	13.6239
11_GL0120222	17.4832	13.1742	14.1804	14.1181	16.3285	16.243	18.7992	18.2381	14.5136	18.1772	16.0234	17.2822	17.0128	16.5284	17.0351	17.1388	15.9286	14.7102	17.5319	16.5992	14.4397	14.8413	13.671	15.9616
1-1_GL0120486	14.8698	NA	NA	NA	NA	NA	12.3627	14.3343	13.9932	NA	15.3044	13.5338	NA	NA	NA	NA	NA	NA	14.4325	13.7638	NA	NA	NA	NA
1-1_GL0120486;7-1_GL0071761	13.4168	NA	13.2162	12.7587	NA	12.5242	11.4391	NA	NA	NA	13.811	12.3365	12.8984	12.4131	NA	NA	NA	11.7469	12.8411	12.4987	NA	NA	12.9377	NA
11_GL0120543	14.2275	13.7271	12.9973	13.1752	14.3019	15.3664	NA	NA	14.1949	NA	NA	NA	14.4737	14.2555	14.37	14.351	13.6275	NA	14.4909	NA	14.5448	16.5806	14.532	NA
11_GL0120543;1A-dyr4-07_GL0078414	14.4256	NA	13.2048	11.7138	14.7876	15.6606	15.072	14.6538	14.0699	12.7442	13.2845	12.0695	14.8312	15.3177	13.3392	14.4058	14.461	14.0869	14.977	14.8977	14.9496	16.2655	14.1944	14.3908
11_GL0120543;1A-dyr4-07_GL0078414;20_GL0054836	14.8791	13.4555	13.4094	13.2181	14.6775	15.4781	14.349	14.466	14.8521	13.4961	14.6694	14.2308	15.0648	14.8621	14.7148	14.461	14.2883	14.689	15.15	14.3983	15.6748	16.1161	14.392	14.4831
11_GL0120543;1A-dyr4-07_GL0078414;2-1_GL0102243;2-1_GL0106087;2-2_GL0094996;2-3_GL0103103;20_GL0054836;22_GL0108699;34_GL0007339;7-1_GL0010569;S-Fe12_GL0142942	13.8572	13.0255	13.9734	13.2386	14.4531	13.9762	14.6329	13.5765	13.7411	NA	13.4889	13.2801	14.7427	14.5496	12.8296	12.8337	14.1149	13.2285	15.0919	14.2043	14.8273	14.8399	13.0858	13.545
11_GL0120543;1A-dyr4-07_GL0078414;2-2_GL0094996;20_GL0054836	14.4891	15.1132	14.7472	14.1577	NA	14.9082	13.8085	NA	NA	13.1566	14.0242	NA	NA	14.1827	14.948	14.2644	14.6793	13.9849	14.7299	14.2387	NA	15.8	NA	14.8695
11_GL0120543;1A-dyr4-07_GL0078414;2-2_GL0094996;22_GL0006093;22_GL0108699;34_GL0007339;7-1_GL0010569;7-5_GL0122421	NA	NA	NA	NA	NA	16.0506	16.9919	NA	15.6247	NA	NA	16.4317	17.771	16.8809	16.2877	15.006	NA	NA	17.1248	NA	17.1416	NA	15.7245	NA
11_GL0120543;20_GL0054836	14.7255	13.1387	12.8053	12.6883	14.2909	15.4275	NA	14.113	13.8911	13.6473	13.9929	12.0811	13.2136	14.0895	14.3059	14.8777	13.3233	14.1432	15.2051	14.0943	14.3393	16.6107	13.7407	15.2841
1-1_GL0120740	NA	12.6885	14.3116	NA	10.9038	14.4233	NA	14.1538	13.8575	13.7069	12.4731	NA	NA	NA	NA	NA	14.8732	13.7893	13.9959	NA	11.5164	NA	NA	10.8948
1-1_GL0121030	NA	NA	NA	10.281	NA	10.189	NA	NA	NA	NA	NA	NA	NA	NA	NA	10.024	10.2965	NA	11.6302	NA	10.2454	NA	NA	NA
11_GL0121511	NA	NA	NA	NA	15.3215	18.457	14.8143	15.4232	14.7378	16.6453	NA	NA	NA	15.3962	NA	NA	NA	NA	NA	NA	NA	NA	NA	NA
11_GL0121511;4-7_GL0021685;Group2-7A_GL0140882	NA	15.2508	NA	13.7174	14.2545	16.8988	13.8197	14.9785	14.0763	15.7455	13.7424	NA	14.0488	14.5131	NA	NA	NA	NA	NA	12.9135	13.5358	NA	NA	NA
11_GL0121511;50_GL0053470;Group2-7A_GL0140882	10.4955	14.7537	NA	13.8038	NA	NA	NA	NA	NA	NA	NA	NA	NA	NA	NA	NA	10.2359	NA	NA	13.9127	NA	NA	NA	NA
11_GL0121511;5-6_GL0095502;Group2-7A_GL0140882	NA	16.292	NA	NA	NA	17.2724	NA	15.8093	14.7496	NA	NA	NA	14.2123	NA	NA	NA	NA	NA	NA	NA	14.0783	NA	NA	NA
11_GL0121511;Group2-7A_GL0140882	12.6346	16.4314	NA	15.4925	15.4336	19.1191	14.9788	17.6489	16.6113	17.8004	13.956	12.9752	15.6701	15.585	13.3356	12.432	12.2637	NA	NA	15.3548	14.3739	13.2811	13.184	NA
11_GL0121666;11_GL0142670;1A-dyr4-07_GL0054274;3-6_GL0057763;4-2_GL0043514;5-1_GL0005641;G1-5A_GL0050443;G1-5A_GL0104094	NA	NA	NA	NA	NA	NA	NA	13.1391	NA	NA	NA	14.1277	15.1358	NA	NA	NA	NA	NA	NA	NA	15.1816	NA	NA	NA
11_GL0121982;1A-dyr2-07_GL0034958;1A-dyr2-07_GL0064584;1A-dyr3-06_GL0017534;1_GL0014036;37_GL0018308;S-Fe10_GL0021310	12.4458	13.5037	11.9278	13.4154	12.5224	14.2236	12.3755	12.918	13.2076	12.2973	13.3742	13.3156	14.1831	12.5717	14.6496	12.8331	13.911	13.1729	13.3677	14.3929	13.6345	14.8368	13.257	11.1294
11_GL0121982;1A-dyr2-07_GL0034958;1A-dyr3-06_GL0017534;1_GL0014036;22_GL0050998;37_GL0018308;6-3_GL0002724;7-5_GL0044338;S-Fe10_GL0021310	14.7575	14.9388	14.0508	14.9352	15.7183	16.0942	14.8783	NA	15.2386	12.5671	14.9644	NA	NA	15.8136	NA	15.0745	15.489	13.961	15.1866	15.1764	NA	15.5657	13.6097	14.0375
11_GL0121982;1A-dyr2-07_GL0034958;1A-dyr3-06_GL0017534;1_GL0014036;37_GL0018308;S-Fe10_GL0021310	15.0936	17.3759	16.4676	17.3221	14.3158	16.2106	12.9455	15.0104	14.9298	14.5715	15.2977	14.6492	15.8521	14.526	16.0255	15.1657	14.6291	14.6771	14.5446	16.6335	15.7847	17.3152	14.2234	13.0104
1-1_GL0122179	NA	NA	NA	NA	NA	NA	NA	NA	NA	NA	NA	NA	NA	NA	NA	NA	17.1959	12.6449	NA	NA	NA	NA	15.2955	NA
1-1_GL0122934	NA	NA	12.7388	NA	15.1159	14.6451	15.991	14.9236	13.5281	14.2628	12.9112	14.9943	NA	15.2207	13.6676	14.2902	13.3886	NA	13.2243	14.6178	14.452	NA	NA	16.184
1-1_GL0122934;17_GL0101695	13.6276	NA	12.6584	12.3566	16.7826	15.2916	18.0347	14.6999	13.5397	13.5359	13.5465	15.4711	12.5526	16.6927	13.4147	15.4255	14.0449	15.8306	13.3026	13.808	15.7481	NA	13.4175	17.6667
1-1_GL0122934;17_GL0101695;S-Fe9_GL0263219	13.0066	NA	13.189	12.2615	17.0519	16.2098	18.4603	15.5362	14.1592	15.5583	13.1571	15.8456	12.3838	17.0692	14.3836	15.3768	14.9676	16.5382	13.6255	15.4526	16.0515	NA	13.3991	18.0372
1-1_GL0122934;S-Fe9_GL0263219	11.5244	9.34421	10.7448	10.287	15.572	14.5301	16.9672	14.2726	12.5336	13.555	12.0336	14.5329	11.4252	15.7289	12.9422	13.8317	13.1827	14.6106	12.3144	13.8153	14.8279	NA	11.9735	15.821
1-1_GL0123182	13.214	14.343	14.7998	15.3366	13.8527	14.1839	12.741	14.6557	14.3879	12.3439	14.8806	13.231	13.8255	13.9329	13.8719	13.5059	13.9869	13.013	15.4807	14.0164	13.6951	14.7829	12.8262	NA
1-1_GL0123183	13.0198	14.1749	14.5261	15.3247	13.5714	13.9506	12.6333	14.6915	14.4586	12.6278	14.7882	13.1861	13.4352	13.5881	13.7099	13.3448	13.8001	12.8987	15.3192	14.0084	13.3649	14.7986	12.285	NA
1-1_GL0123184	16.6315	16.5906	17.6219	17.0027	15.5189	15.3769	14.4497	16.1804	15.959	14.5968	16.6453	15.518	14.5929	15.6436	15.4611	14.7594	16.413	14.2723	16.8422	16.1015	14.4281	16.2591	14.8241	12.8629
1-1_GL0123184;16_GL0083579	17.5566	18.6885	19.1579	18.767	17.4412	17.1094	15.9785	16.8051	17.2215	14.7685	17.8578	14.9161	17.1601	17.372	18.1317	16.7871	17.6889	15.8688	18.1952	16.5881	17.5341	17.6856	17.7355	14.6257
1-1_GL0123184;16_GL0083579;3-1_GL0060298;40_GL0063975;G1-1A_GL0096667;MC-0-1_GL0020527;MC-6-3_GL0028761;MH-0-4_GL0006010;S-Fe10_GL0025322;S-Fe10_GL0157138;S-Fe11_GL0106313	19.0613	19.7931	19.9518	19.5663	18.7419	18.5198	17.2236	19.0091	18.3679	17.0374	19.6074	17.466	18.3356	18.7743	19.356	17.8984	19.048	17.8568	19.3562	18.0417	18.3737	18.8488	18.9878	16.3562
1-1_GL0123184;16_GL0083579;3-1_GL0060298;40_GL0063975;MH-0-4_GL0006010;S-Fe10_GL0025322	18.6413	19.3982	19.8111	19.4402	18.0771	17.9386	16.6405	18.1319	18.0182	16.0755	18.649	16.4013	17.9253	18.2877	18.9783	17.3625	18.6359	16.778	18.7131	17.5556	18.0752	18.3849	17.993	15.6087
1-1_GL0123184;16_GL0083579;3-1_GL0060298;G1-1A_GL0096667;MC-0-1_GL0020527;MC-6-3_GL0028761;S-Fe10_GL0025322;S-Fe10_GL0157138;S-Fe11_GL0106313	17.0252	18.0331	17.6769	17.3526	NA	15.285	14.7745	15.21	15.1762	13.9605	16.5906	14.2467	15.524	NA	14.0261	14.6457	15.9041	14.2678	16.5857	15.3331	15.6633	15.7202	15.8871	14.1748
1-1_GL0123184;G1-1A_GL0096667;MC-0-1_GL0020527;MC-6-3_GL0028761;S-Fe10_GL0025322;S-Fe10_GL0157138	18.833	19.1714	18.5209	19.3024	18.5688	18.0743	16.9532	18.7027	16.6674	16.1319	19.4636	16.9165	18.3481	18.6228	19.3225	17.282	19.0366	17.0326	19.3362	17.392	18.1322	18.6736	18.3484	16.2055
1-1_GL0123184;MC-6-3_GL0028761;S-Fe10_GL0025322;S-Fe10_GL0157138	14.2033	14.4809	14.5478	13.4791	13.0365	13.1409	12.1145	13.406	11.8567	12.1149	13.9755	11.9985	12.9475	12.9273	NA	11.6831	13.1186	NA	14.0608	12.4752	12.2495	13.9671	13.1328	NA
1-1_GL0123184;S-Fe10_GL0025322;S-Fe10_GL0157138;S-Fe11_GL0106313	15.7229	NA	16.4904	15.2839	NA	18.9537	NA	15.7895	NA	NA	NA	15.6852	15.2802	NA	NA	NA	NA	NA	NA	NA	15.7255	NA	16.0075	NA
1-1_GL0123231	14.4486	13.2144	14.5503	13.4412	15.276	14.7429	15.6146	13.7129	14.9481	14.6637	14.3794	14.6396	15.5907	15.3798	14.7268	14.5858	15.0705	14.8407	14.8909	13.7977	15.1112	12.4072	14.5274	15.0835
1-1_GL0123651;2-1_GL0024479;2-1_GL0104769;2-1_GL0121720;2-2_GL0154687;2-5_GL0005063;2A-dyr16-06_GL0046586;34_GL0037103;6-2_GL0069558	14.2196	NA	15.8931	14.2282	NA	14.7765	14.2911	NA	NA	12.0576	14.8265	NA	NA	NA	NA	NA	NA	13.8427	13.4167	15.3575	NA	12.2771	NA	15.1235
1-1_GL0123651;2-1_GL0024479;2-1_GL0104769;2-1_GL0121720;2-2_GL0154687;2-5_GL0005063;2A-dyr16-06_GL0046586;6-2_GL0069558	14.2529	13.2474	13.393	13.5861	15.981	14.7903	15.8679	13.8909	14.875	NA	14.8716	15.4032	16.101	16.1244	NA	NA	13.9461	14.2696	16.0329	16.3148	15.7272	14.4057	13.7355	14.414
1-1_GL0123651;2-1_GL0024479;2-1_GL0104769;2-1_GL0121720;2-2_GL0154687;2-5_GL0005063;34_GL0037103;6-2_GL0069558	17.0266	14.6926	14.8669	15.2237	17.8636	17.2795	17.7038	NA	16.5177	14.3592	17.0382	NA	17.9126	17.9639	17.5269	16.173	16.5051	16.4453	17.5696	17.8606	17.7355	16.2962	15.607	15.6389
1-1_GL0123651;2-1_GL0024479;2-1_GL0104769;2-1_GL0121720;2-2_GL0154687;2-5_GL0005063;6-2_GL0069558	NA	NA	NA	NA	13.9458	13.0116	14.0504	14.5015	12.9032	NA	NA	13.3008	14.229	13.6551	14.4498	12.6677	12.4109	NA	13.806	14.6072	13.8307	12.147	12.3837	NA
1-1_GL0123651;2-1_GL0024479;2-1_GL0104769;2-5_GL0005063;34_GL0037103;6-2_GL0069558	14.6547	NA	NA	NA	NA	NA	NA	NA	NA	NA	NA	NA	NA	NA	NA	NA	NA	NA	NA	NA	NA	NA	NA	NA
1-1_GL0123651;2-1_GL0024479;2-1_GL0121720;2-5_GL0005063	14.2858	12.1013	13.5759	12.8679	16.0139	14.6655	15.9213	13.7985	14.7749	14.0645	14.3253	12.7811	15.4174	16.1745	15.7076	14.3749	14.6502	14.7696	14.3201	14.0184	15.1395	13.8651	14.32	14.7188
1-1_GL0123651;2-1_GL0104769;2-1_GL0121720;2-2_GL0154687;2-5_GL0005063;6-2_GL0069558	14.4545	12.4709	13.2226	12.8959	16.0049	14.4395	15.5337	14.5626	13.7543	13.1084	14.547	14.866	15.7842	16.0486	15.0383	13.944	14.7148	14.449	15.5282	14.9824	15.3409	14.1542	13.8702	14.1385
1-1_GL0123651;2-1_GL0104769;2-1_GL0121720;2-5_GL0005063;6-2_GL0069558	14.8587	NA	9.89588	10.6209	15.3368	14.1281	15.816	13.893	13.9261	11.8097	13.3709	15.8772	14.9364	15.3351	13.6618	13.0318	13.9074	13.306	14.6364	15.7092	14.5441	13.6083	13.3721	13.8524
1-1_GL0123651;2-1_GL0104769;2-5_GL0005063	16.2371	NA	11.3608	NA	15.6027	14.9666	16.6581	13.9517	14.6075	13.3764	15.0805	16.5072	NA	15.633	NA	12.3408	14.1295	13.3347	14.9503	16.3882	15.481	NA	13.9123	14.6463
1-1_GL0123826	13.441	12.6968	12.1649	12.5305	14.818	14.9601	15.3743	14.8239	14.208	12.7774	13.5649	13.9366	15.0137	15.2043	14.7828	13.9006	14.7098	14.4445	14.5626	14.0077	14.0935	14.4081	13.4672	12.8447
1-1_GL0123826;MH-6-5_GL0072282	13.6369	13.2334	12.5856	13.2843	15.2815	15.0186	14.8898	14.3008	14.9319	14.0642	12.9283	13.7826	15.4636	15.4064	13.3713	13.6296	15.7486	14.408	14.4825	12.2175	15.2042	14.6229	14.0629	14.6235
1-1_GL0123826;S-Fe20_GL0020046	14.2395	NA	NA	NA	15.0214	14.8349	15.1886	14.073	14.3585	13.9765	14.6044	14.6347	15.0233	15.0649	15.3989	14.1188	15.2085	14.1431	14.8709	14.4663	14.8036	14.2199	12.7524	13.4517
1-1_GL0123934	11.3715	14.5704	12.7488	15.0914	12.9047	14.5827	12.3289	14.6945	13.0055	13.3201	12.7963	12.8034	12.6885	12.9169	11.7585	11.9097	12.5551	12.9604	13.4805	12.456	12.4117	13.2708	13.3475	12.0834
1-1_GL0123935	12.5085	14.9201	13.4479	15.6838	13.7226	14.7646	13.0193	15.152	13.2349	13.9381	13.6622	13.2832	13.4148	13.6612	12.6147	12.6978	13.1616	13.4565	14.0492	13.2915	13.0963	13.6352	13.683	12.753
1-1_GL0123935;MC-0-1_GL0054819;MC-6-3_GL0095560;S-Fe15_GL0060535	16.2474	17.6464	17.2273	17.2332	15.719	15.8954	14.4939	17.1565	16.1171	15.2535	16.4742	15.2713	14.9098	15.8364	16.1814	15.3255	15.7369	14.6615	16.3954	15.8101	14.4187	15.7226	15.8528	14.5082
1-1_GL0123965;10_GL0077463	NA	NA	NA	12.6357	NA	NA	NA	NA	NA	NA	NA	NA	NA	NA	NA	NA	NA	NA	NA	NA	NA	13.51	NA	NA
1-1_GL0123965;10_GL0077463;17_GL0103254;2-2_GL0047467;23_GL0145025;7-5_GL0024707;MC-6-5_GL0049850	10.585	10.3886	10.0465	11.6575	11.4859	11.2863	11.2202	10.321	11.4932	NA	10.4482	NA	NA	11.4021	11.6594	9.98504	12.1567	10.8703	11.5014	9.29203	12.1511	10.6334	10.2997	10.6673
1-1_GL0124304;1-3_GL0119037;54_GL0001050	NA	NA	NA	NA	NA	14.0955	NA	NA	11.5424	12.169	NA	14.0326	12.3695	12.7136	NA	NA	NA	13.1618	NA	NA	NA	12.4249	NA	NA
1-1_GL0124304;1-3_GL0119037;54_GL0001050;MH-6-4_GL0136450	NA	10.4756	NA	NA	10.3385	12.4652	10.8876	10.4897	NA	NA	10.7996	NA	10.6541	10.4422	NA	NA	10.5873	NA	11.3995	NA	NA	11.0813	NA	NA
1-1_GL0124360	NA	NA	12.1538	NA	NA	NA	NA	NA	NA	NA	NA	NA	NA	NA	12.109	NA	NA	NA	NA	NA	11.0363	NA	NA	NA
1-1_GL0124400;11_GL0126032;19_GL0080876;1A-dyr4-07_GL0054247;3-1_GL0067242;34_GL0080700;4-2_GL0043553;4-3_GL0069547;41_GL0105928;5-1_GL0034953;5-4_GL0087957;6-2_GL0074047;6-5_GL0016265;G1-1A_GL0022223;S-Fe9_GL0236957	14.2874	13.914	14.2422	14.2265	15.9522	14.5055	15.6165	14.7175	15.3661	13.5245	14.7445	14.8679	NA	16.0914	14.6982	14.9624	15.0664	14.9832	15.7429	15.1274	15.865	15.0664	14.8965	14.7345
1-1_GL0124400;11_GL0126032;19_GL0080876;1A-dyr4-07_GL0054247;3-1_GL0067242;34_GL0080700;4-2_GL0043553;4-3_GL0069547;5-1_GL0034953;5-4_GL0087957;6-2_GL0074047;6-5_GL0016265;G1-1A_GL0006230;G1-1A_GL0022223;G1-5A_GL0018538;S-Fe9_GL0236957	13.312	12.9962	12.6432	13.2664	15.4312	15.2512	15.1583	13.999	14.8195	13.4199	14.4706	13.9502	14.6793	15.3866	15.6851	13.9561	14.4337	14.734	15.6061	14.7089	15.2606	15.0724	13.8944	13.9638
1-1_GL0124400;11_GL0126032;19_GL0080876;1A-dyr4-07_GL0054247;3-1_GL0067242;34_GL0080700;4-2_GL0043553;4-3_GL0069547;5-1_GL0034953;5-4_GL0087957;6-2_GL0074047;G1-1A_GL0006230;G1-1A_GL0022223;G1-5A_GL0018538;S-Fe9_GL0236957	NA	NA	NA	11.2698	13.1714	13.6944	13.0169	12.8343	12.104	NA	11.7965	11.5828	13.3835	13.3753	13.3264	11.2105	12.5233	12.5007	14.1427	12.4221	13.7261	13.6508	11.9349	11.6295
1-1_GL0124400;19_GL0080876;3-1_GL0067242;34_GL0080700;4-2_GL0043553;4-3_GL0069547;5-1_GL0034953;5-4_GL0087957;6-2_GL0074047;6-5_GL0016265;G1-1A_GL0006230;G1-1A_GL0013733;G1-1A_GL0022223;G1-5A_GL0018538;S-Fe12_GL0097844;S-Fe9_GL0236957	14.0084	12.998	14.1928	13.1806	16.214	15.9015	16.4571	14.7327	14.6763	13.3394	14.6295	14.7488	15.9014	16.3578	16.3072	14.7734	14.779	15.1861	16.296	14.4265	15.9959	15.0546	14.1049	14.7318
1-1_GL0124400;19_GL0080876;3-1_GL0067242;34_GL0080700;4-2_GL0043553;4-3_GL0069547;5-1_GL0034953;5-4_GL0087957;6-2_GL0074047;6-5_GL0016265;G1-1A_GL0022223;S-Fe9_GL0236957	15.0967	14.4	14.7775	14.7661	16.6564	16.451	16.7022	15.9555	15.7866	14.505	16.196	16.0486	16.3811	16.9938	16.8291	15.4653	16.1208	16.4245	17.0354	16.3674	16.7425	16.3402	15.6021	15.1423
1-1_GL0124400;3-1_GL0067242;34_GL0080700;4-3_GL0069547;5-1_GL0034953;6-2_GL0074047;G1-1A_GL0013733;G1-1A_GL0022223;S-Fe12_GL0097844;S-Fe9_GL0236957	14.6911	12.4403	13.1633	13.0314	15.3774	14.7021	15.6863	14.1184	14.6877	12.2372	15.2226	14.1504	15.031	15.4	16.0588	13.7821	14.3502	14.4619	15.6698	15.081	15.7409	14.9139	14.3701	12.949
1-1_GL0124400;34_GL0080700	13.5828	13.5984	13.6486	13.5857	14.0524	14.2797	14.6572	NA	14.4344	13.0221	14.4212	14.5154	14.1721	14.2146	15.1361	13.3616	14.6853	14.3418	15.6771	14.3049	15.0109	13.9921	13.262	13.1181
1-1_GL0124400;34_GL0080700;4-2_GL0043553;4-3_GL0069547;5-1_GL0034953;6-2_GL0074047;6-5_GL0016265;G1-1A_GL0022223;S-Fe9_GL0236957	NA	NA	NA	NA	14.0299	NA	13.9161	NA	NA	NA	NA	13.4963	NA	13.9841	NA	NA	13.6957	NA	14.4519	13.461	NA	NA	NA	12.9153
1-1_GL0124968;1-3_GL0067546;11_GL0012544;17_GL0099606;2-2_GL0031086;23_GL0073161;32_GL0022008;4-7_GL0040126;6-5_GL0115677;MC-0-3_GL0075314;MH-0-4_GL0077722;S-Fe3_GL0108759	11.3989	10.8517	10.9112	10.4427	13.0733	12.0327	13.4605	10.9434	13.0844	9.95309	11.7988	11.7828	14.0089	13.1544	11.307	11.3568	12.2275	10.877	13.3587	11.4829	13.5391	13.0255	12.0839	11.8052
1-1_GL0125402	NA	NA	NA	NA	NA	NA	NA	NA	NA	NA	NA	NA	NA	NA	NA	NA	NA	NA	NA	NA	10.7779	NA	NA	NA
1-1_GL0125402;Group2-3A_GL0110902;Group2-8A_GL0080257	NA	NA	NA	12.0961	NA	NA	NA	NA	NA	NA	NA	NA	NA	NA	12.2217	12.982	NA	NA	NA	NA	12.5605	NA	NA	NA
1-1_GL0125465;4-8_GL0090143;Group2-2A_GL0141779	NA	NA	NA	NA	NA	NA	NA	NA	NA	NA	NA	NA	NA	NA	13.9521	NA	NA	NA	NA	NA	NA	NA	NA	NA
1-1_GL0125465;4-8_GL0090143;Group2-2A_GL0141779;Group2-4A_GL0024003	15.1008	13.4891	13.6466	13.9143	14.8726	13.9835	14.8544	14.6694	15.2928	13.2455	14.3021	15.1145	14.4485	14.6301	14.7619	14.9593	14.8565	14.6924	14.6378	14.8058	14.4137	14.5621	14.3538	14.9305
1-1_GL0125549;G1-1A_GL0096895	12.1181	11.3035	10.4134	12.3566	11.5101	12.4533	13.2932	12.2826	12.0028	11.4745	NA	NA	NA	12.0275	11.7928	12.8596	NA	12.2173	NA	NA	13.3461	11.4704	NA	NA
11_GL0125565	NA	NA	NA	NA	NA	NA	NA	11.2493	NA	13.9027	NA	NA	NA	NA	12.3246	8.96148	NA	NA	NA	NA	11.5355	10.8263	NA	NA
11_GL0125565;6-2_GL0034935	NA	NA	NA	NA	NA	17.3321	NA	NA	16.712	14.2849	17.1053	NA	NA	NA	NA	NA	NA	NA	NA	14.0312	16.7036	17.2472	NA	15.325
11_GL0125782	13.6441	13.7137	12.9081	13.1466	13.9678	15.9071	15.2213	14.4159	14.0779	14.6068	13.6615	14.1496	12.9799	14.2243	14.0662	14.8366	13.7666	14.3172	14.4614	14.8777	13.3628	15.083	13.5353	13.2562
1-1_GL0125873;17_GL0097629;32_GL0078441;Group2-3A_GL0004546	12.8526	13.1692	10.6438	13.6633	14.5259	13.6766	13.4227	12.2656	13.9651	13.1482	13.1869	11.8859	13.5976	14.5609	12.2169	12.1304	15.8251	12.8512	14.2569	13.4697	14.4525	15.0649	12.9297	14.9472
1-1_GL0125873;2-2_GL0125568;2-4_GL0104156;3-1_GL0029024;3-1_GL0072055;3-2_GL0067551;3-7_GL0012920;32_GL0078441;7-8_GL0039477;7-8_GL0053041;G1-5A_GL0090424;Group2-3A_GL0004546;Group2-3A_GL0065518;MC-6-2_GL0062253;MC-6-2_GL0084502;S-Fe10_GL0036194;S-Fe12_GL0211469	18.1133	16.0189	17.2236	16.5873	17.8632	18.372	18.2746	16.6973	17.1002	15.8853	17.6771	17.3703	18.8323	17.853	19.4615	17.1681	16.8589	16.523	18.9935	17.645	17.9658	17.9484	16.5957	15.9844
1-1_GL0125873;2-2_GL0125568;3-1_GL0029024;3-1_GL0072055;32_GL0078441;Group2-3A_GL0004546;MC-6-2_GL0062253;MC-6-2_GL0084502;S-Fe10_GL0036194;S-Fe12_GL0211469	NA	NA	NA	NA	NA	NA	NA	15.154	12.3643	NA	NA	14.8366	13.4995	NA	NA	NA	NA	NA	NA	NA	12.0925	NA	13.0664	NA
11_GL0126032	NA	NA	NA	NA	NA	NA	NA	NA	NA	NA	NA	NA	NA	NA	9.33964	NA	NA	NA	NA	NA	NA	NA	NA	NA
11_GL0126032;19_GL0080876;1A-dyr4-07_GL0054247;4-2_GL0043553;5-1_GL0034953;5-4_GL0087957;G1-1A_GL0022223	13.3432	13.1636	13.2257	13.9653	15.2905	14.8717	15.1891	NA	NA	13.4814	14.6521	14.8643	15.2906	15.4895	15.5144	14.2231	14.4265	14.7282	15.7612	14.7913	15.5206	15.3478	14.6797	14.2521
[truncated: 10,502 more rows]

## Sheet: Host-Protein
Protein.Group	NV-284-14D	NV-284-Pre	NV-285-14D	NV-285-Pre	NV-291-14D	NV-291-Pre	NV-292-14D	NV-292-Pre	SHAM-257-14D	SHAM-257-Pre	SHAM-258-14D	SHAM-258-Pre	SHAM-514-14D	SHAM-514-Pre	SHAM-523-14D	SHAM-523-Pre	SNI-259-14D	SNI-259-Pre	SNI-260-14D	SNI-260-Pre	SNI-485-14D	SNI-485-Pre	SNI-509-14D	SNI-509-Pre
[truncated: 2,267 more rows]

[truncated: 2 more sheets: Microbiota-Peptide, Host-Peptide]
