# Supplementary material for: Increasing taxonomic and functional characterization of host-microbiome interactions by DIA-PASEF metaproteomics
Source: Front Microbiol. 2023 Oct 16;14:1258703. doi: 10.3389/fmicb.2023.1258703 (PMC10613666; doi:10.3389/fmicb.2023.1258703)
Supplement: Supplementary file 15 [file Table_8.XLSX]

## Sheet: Sheet1
Sequence	LCA	Rank	Superkingdom	Kingdom	Phylum	Class	Order	Family	Genus	Species	NV-284-14D	NV-284-Pre	NV-285-14D	NV-285-Pre	NV-291-14D	NV-291-Pre	NV-292-14D	NV-292-Pre	SHAM-257-14D	SHAM-257-Pre	SHAM-258-14D	SHAM-258-Pre	SHAM-514-14D	SHAM-514-Pre	SHAM-523-14D	SHAM-523-Pre	SNI-259-14D	SNI-259-Pre	SNI-260-14D	SNI-260-Pre	SNI-509-14D	SNI-509-Pre	SNI-485-14D	SNI-485-Pre
AAAAAIEAMK	Firmicutes bacterium ASF500	Species	Bacteria		Firmicutes					Firmicutes bacterium ASF500	NA	12.7463	NA	12.8537	13.5459	NA	NA	NA	NA	NA	NA	NA	14.0007	13.4858	14.6419	NA	NA	NA	NA	NA	NA	NA	NA	NA
AAAAGCPDAAAAIDK	Eubacterium plexicaudatum	Species	Bacteria		Firmicutes	Clostridia	Clostridiales	Eubacteriaceae	Eubacterium	Eubacterium plexicaudatum	12.7141	11.4894	11.4213	11.5779	12.2612	13.5299	NA	12.054	12.5771	NA	12.7737	NA	11.9219	12.1074	NA	13.0421	11.9123	11.8255	13.6076	NA	12.1754	13.7741	13.0703	14.9723
AAAAGCPDAAAAIDKK	Eubacterium plexicaudatum	Species	Bacteria		Firmicutes	Clostridia	Clostridiales	Eubacteriaceae	Eubacterium	Eubacterium plexicaudatum	14.8326	13.9861	12.4718	13.2561	14.5438	15.9291	11.1394	13.6524	14.1619	12.9374	14.2606	11.5286	13.5707	14.2974	13.7303	15.1494	13.9935	13.839	15.7239	14.0394	13.7327	16.1932	15.0447	17.6704
AAAAGVVVDYK	Anaerotruncus sp. G3(2012)	Species	Bacteria		Firmicutes	Clostridia	Clostridiales	Ruminococcaceae	Anaerotruncus	Anaerotruncus sp. G3(2012)	NA	12.1843	10.9785	12.0488	12.1854	NA	11.1087	12.47	11.804	NA	NA	NA	12.107	12.5021	12.232	12.0758	11.3728	12.2626	12.9035	11.9548	11.7467	12.4087	12.788	14.2585
AAAASLGEHILTLQK	Mus musculus	Species	Eukaryota	Metazoa	Chordata	Mammalia	Rodentia	Muridae	Mus	Mus musculus	NA	NA	NA	NA	NA	NA	NA	15.3456	NA	NA	NA	NA	NA	NA	NA	NA	NA	NA	NA	NA	NA	NA	NA	NA
AAAATETSSVFADPVISK	Muridae	Family	Eukaryota	Metazoa	Chordata	Mammalia	Rodentia	Muridae			NA	NA	NA	10.0104	NA	10.1999	NA	NA	NA	NA	NA	NA	NA	NA	NA	NA	NA	NA	NA	NA	NA	NA	NA	NA
AAACSIVPNSTGAAK	Firmicutes	Phylum	Bacteria		Firmicutes						12.5945	12.4271	12.7767	NA	15.098	15.2238	16.6893	15.8197	12.5354	14.5295	NA	14.5187	14.39	15.1428	12.2612	13.2693	13.9641	NA	14.6401	14.8217	13.8512	14.9367	15.6553	15.0051
AAADLGESVSDINSSSR	Lactobacillus	Genus	Bacteria		Firmicutes	Bacilli	Lactobacillales	Lactobacillaceae	Lactobacillus		12.0974	13.1623	NA	NA	NA	NA	10.9649	12.8458	NA	NA	13.1458	12.6265	12.0803	NA	11.7229	10.5007	NA	10.7428	12.3052	12.1442	13.1923	NA	11.0071	NA
AAADQNSEQLGSVAK	Lachnospiraceae bacterium A4	Species	Bacteria		Firmicutes	Clostridia	Clostridiales	Lachnospiraceae		Lachnospiraceae bacterium A4	NA	NA	NA	9.45311	11.5446	10.2998	9.7827	NA	NA	NA	NA	NA	NA	11.9055	NA	NA	9.72999	NA	NA	NA	NA	7.36066	10.0505	NA
AAADYFGMPLYR	Alistipes	Genus	Bacteria		Bacteroidetes	Bacteroidia	Bacteroidales	Rikenellaceae	Alistipes		14.9793	16.5855	15.2244	16.7675	15.3805	15.9711	14.119	15.5794	14.4353	16.024	15.2371	14.3247	15.0087	15.4466	14.4974	14.9732	14.8117	14.9399	15.4343	14.6996	14.9188	15.1149	15.249	14.9418
AAADYLDLPLYK	Bacteroidales	Order	Bacteria		Bacteroidetes	Bacteroidia	Bacteroidales				18.3852	17.8085	18.8294	17.5098	17.1201	16.0869	16.1988	16.2841	16.4939	16.2507	18.4055	16.412	16.2762	17.2376	16.7144	15.2798	17.0069	16.5598	17.2032	16.4196	16.8722	15.2114	16.5817	16.8682
AAADYLGLPLYK	Sphaerochaeta globosa	Species	Bacteria		Spirochaetes	Spirochaetia	Spirochaetales	Spirochaetaceae	Sphaerochaeta	Sphaerochaeta globosa	16.8449	NA	16.3453	NA	11.5547	NA	12.6687	NA	11.2937	NA	12.7286	NA	11.4624	11.773	14.4743	12.801	10.7155	NA	12.1414	11.6524	13.3039	NA	NA	14.5969
AAAEEKSPVILQVSK	Bacteroidales	Order	Bacteria		Bacteroidetes	Bacteroidia	Bacteroidales				11.9817	NA	NA	NA	12.0572	11.1923	NA	NA	NA	NA	12.8406	NA	NA	NA	NA	NA	NA	NA	12.6771	9.80486	NA	NA	NA	11.2117
AAAEELKAK	Propionispora sp. 2/2-37	Species	Bacteria		Firmicutes	Negativicutes	Selenomonadales	Sporomusaceae	Propionispora	Propionispora sp. 2/2-37	NA	NA	NA	NA	NA	NA	14.6431	NA	NA	NA	NA	NA	NA	NA	NA	NA	NA	NA	NA	NA	NA	NA	NA	NA
AAAEIACLNNATGSDSR	Lachnospiraceae bacterium MD308	Species	Bacteria		Firmicutes	Clostridia	Clostridiales	Lachnospiraceae		Lachnospiraceae bacterium MD308	NA	10.0088	NA	10.2171	11.0199	NA	10.2073	NA	11.9506	NA	11.1943	11.3425	NA	10.5418	NA	10.5565	11.0228	NA	10.4096	10.4249	NA	NA	10.3794	NA
AAAESCGLPLYR	Mucispirillum schaedleri	Species	Bacteria		Deferribacteres	Deferribacteres	Deferribacterales	Deferribacteraceae	Mucispirillum	Mucispirillum schaedleri	NA	NA	NA	10.5584	11.6038	NA	12.5575	NA	NA	9.60826	NA	11.0527	NA	11.6776	NA	NA	11.2685	12.412	NA	11.4909	NA	11.8438	11.8592	12.9624
AAAESLGTSLYNYIGGVNAK	Ruminococcaceae	Family	Bacteria		Firmicutes	Clostridia	Clostridiales	Ruminococcaceae			12.9266	11.2783	10.9988	13.0022	12.2883	13.5048	13.6497	13.0757	12.3929	11.8934	12.1753	12.0011	12.8759	12.4071	12.6894	12.5791	12.216	11.1957	11.7899	11.4627	10.715	11.5184	12.6995	14.5392
AAAEVNQEYGLDPK	Muridae	Family	Eukaryota	Metazoa	Chordata	Mammalia	Rodentia	Muridae			12.5288	14.9253	14.3609	14.5662	11.8404	14.0591	10.2695	NA	12.5477	11.5565	11.4916	12.6814	13.0023	12.2155	12.9996	12.5288	11.8554	13.0821	12.8856	12.3911	NA	11.0136	12.8056	13.323
AAAFEQLQK	Mammalia	Class	Eukaryota	Metazoa	Chordata	Mammalia					NA	12.4494	NA	NA	NA	11.9695	NA	NA	NA	NA	NA	NA	NA	NA	NA	NA	NA	NA	NA	NA	NA	NA	NA	NA
AAAGNVLVVDGLK	Firmicutes bacterium ASF500	Species	Bacteria		Firmicutes					Firmicutes bacterium ASF500	NA	10.2252	NA	10.8659	11.8114	11.7408	NA	11.547	NA	NA	11.5107	NA	NA	11.668	11.7825	11.5143	NA	NA	12.3369	NA	NA	9.94252	NA	NA
AAAGVILITTK	Bacteroidetes	Phylum	Bacteria		Bacteroidetes						NA	NA	NA	NA	NA	NA	NA	12.4475	11.856	NA	NA	NA	NA	NA	NA	NA	NA	NA	NA	NA	NA	NA	NA	NA
AAAGYQIAK	Clostridiales	Order	Bacteria		Firmicutes	Clostridia	Clostridiales				NA	NA	NA	NA	11.766	NA	12.7349	NA	NA	NA	NA	12.9141	NA	NA	12.697	NA	11.8108	NA	NA	11.705	NA	NA	NA	NA
AAAIATGFK	Bacteroidales	Order	Bacteria		Bacteroidetes	Bacteroidia	Bacteroidales				NA	12.0122	12.9218	NA	NA	NA	NA	13.0813	12.672	NA	14.2092	NA	12.971	NA	NA	NA	13.2061	NA	14.6242	NA	12.8726	NA	12.3297	12.4285
AAAICGADMK	Bacteria	Superkingdom	Bacteria								NA	NA	NA	NA	15.8798	14.3257	15.4949	14.6383	12.6344	NA	13.1039	NA	15.3756	15.8292	14.1597	13.1968	13.796	13.9081	13.1102	NA	NA	13.7398	13.5546	13.6861
AAAINIIPHSTGAAK	Lactobacillus	Genus	Bacteria		Firmicutes	Bacilli	Lactobacillales	Lactobacillaceae	Lactobacillus		NA	NA	NA	NA	NA	NA	NA	15.9133	NA	NA	NA	15.7597	NA	NA	NA	NA	NA	NA	NA	NA	NA	NA	NA	NA
AAAINIVPNSTGAAK	Bacteria	Superkingdom	Bacteria								15.0288	13.6562	14.2995	14.4228	16.701	15.3223	17.4613	15.545	14.1667	12.6355	16.4193	13.9636	16.5014	16.8394	18.1767	15.7483	15.0768	15.1933	17.1891	15.2218	14.3138	14.1807	16.0379	16.4172
AAALQPGEVLLLENLR	Bacteria	Superkingdom	Bacteria								NA	11.6979	NA	13.2034	12.8772	12.86	NA	8.66419	NA	NA	NA	NA	12.8117	12.7775	13.6623	NA	NA	NA	12.193	11.938	NA	NA	NA	14.4789
AAAMAANLQR	Clostridiales	Order	Bacteria		Firmicutes	Clostridia	Clostridiales				NA	NA	NA	NA	12.9256	13.3432	13.1011	NA	NA	NA	NA	NA	13.1502	12.837	14.4812	12.4156	NA	12.7851	14.3712	NA	NA	NA	NA	15.4205
AAAMSMIPTTTGAAR	Bacteria	Superkingdom	Bacteria								11.9115	NA	NA	NA	NA	NA	NA	NA	NA	NA	NA	11.215	NA	NA	NA	12.1727	NA	NA	NA	NA	12.7556	NA	NA	12.0916
AAAMSTNYSESIILVADAIK	Lachnospiraceae bacterium 28-4	Species	Bacteria		Firmicutes	Clostridia	Clostridiales	Lachnospiraceae		Lachnospiraceae bacterium 28-4	NA	NA	NA	NA	NA	10.277	NA	8.67463	NA	NA	NA	NA	NA	NA	NA	NA	9.24398	NA	NA	NA	NA	NA	NA	NA
AAAMTFVK	Acidaminococcus	Genus	Bacteria		Firmicutes	Negativicutes	Acidaminococcales	Acidaminococcaceae	Acidaminococcus		NA	NA	NA	NA	11.9422	NA	NA	NA	NA	NA	NA	NA	NA	11.8628	NA	NA	14.6597	14.1581	NA	NA	13.632	NA	NA	10.0448
AAAMVFVK	Roseburia intestinalis	Species	Bacteria		Firmicutes	Clostridia	Clostridiales	Lachnospiraceae	Roseburia	Roseburia intestinalis	NA	NA	NA	NA	14.4849	NA	13.3229	NA	NA	NA	NA	11.197	13.1114	14.2105	NA	10.4327	11.9946	NA	12.545	12.3386	13.1581	11.0815	12.983	NA
AAANEQLTR	Mammalia	Class	Eukaryota	Metazoa	Chordata	Mammalia					12.2888	NA	12.7949	11.8707	NA	13.2482	NA	NA	NA	NA	NA	NA	NA	NA	NA	NA	NA	NA	12.3769	NA	NA	NA	NA	NA
AAANESFGYNEDEIVSSDIVGMK	Clostridiales	Order	Bacteria		Firmicutes	Clostridia	Clostridiales				NA	NA	11.8964	NA	13.4007	13.8936	14.5764	14.2875	11.346	NA	NA	NA	12.5	13.7142	13.6831	13.5976	12.9767	12.2853	11.832	NA	14.4521	NA	14.4665	13.3828
AAANESFGYNEDEIVSSDIVGMR	Clostridiales	Order	Bacteria		Firmicutes	Clostridia	Clostridiales				14.1411	12.3669	12.1529	11.4096	14.4934	14.7487	16.2045	13.9882	12.5008	NA	14.3722	14.7472	NA	14.5919	15.1102	12.7449	12.809	12.4038	14.4169	13.7011	13.1698	12.9097	14.1885	15.2006
AAANESFGYNEDEIVSSDVIGMR	Lachnospiraceae bacterium A4	Species	Bacteria		Firmicutes	Clostridia	Clostridiales	Lachnospiraceae		Lachnospiraceae bacterium A4	14.4171	NA	11.2265	NA	14.3362	14.7246	16.0439	14.1087	12.5897	12.1483	13.7866	14.545	14.3866	14.2628	14.571	11.4121	12.3861	12.9606	14.8605	14.6769	NA	12.2936	14.0094	NA
AAANYLDMPLYR	Tannerella forsythia	Species	Bacteria		Bacteroidetes	Bacteroidia	Bacteroidales	Tannerellaceae	Tannerella	Tannerella forsythia	14.6193	15.5897	15.3807	15.8239	13.824	15.0681	12.8487	15.6958	14.7155	13.9847	15.2256	14.6201	13.2293	13.8937	14.7219	14.6753	14.9926	13.4559	15.6093	14.3043	15.5737	13.551	13.7655	15.7307
AAAPMIPFMTEDIYR	Clostridiales	Order	Bacteria		Firmicutes	Clostridia	Clostridiales				13.6319	9.88572	NA	NA	13.2937	12.9692	14.9531	NA	11.9434	NA	NA	NA	13.3728	13.7767	13.9243	11.4992	12.0721	12.2858	14.1788	13.868	11.5809	NA	12.8463	12.8938
AAAQAALLAATSEIDK	Clostridiales	Order	Bacteria		Firmicutes	Clostridia	Clostridiales				NA	NA	NA	NA	NA	NA	NA	NA	NA	NA	NA	12.7881	NA	NA	12.5053	NA	NA	NA	NA	NA	11.5417	NA	11.6282	NA
AAAQAALLAATTEIDK	Clostridiales	Order	Bacteria		Firmicutes	Clostridia	Clostridiales				NA	NA	NA	NA	NA	12.3177	NA	12.4562	NA	NA	NA	13.1288	NA	NA	12.4478	NA	NA	NA	NA	NA	NA	NA	13.521	NA
AAAQEWLDGKDNADASK	Prevotella enoeca	Species	Bacteria		Bacteroidetes	Bacteroidia	Bacteroidales	Prevotellaceae	Prevotella	Prevotella enoeca	NA	NA	NA	NA	NA	NA	NA	NA	NA	NA	NA	NA	13.6701	NA	NA	NA	NA	NA	NA	NA	NA	NA	12.1197	NA
AAAQNTIPHSTGAAK	Lactobacillaceae	Family	Bacteria		Firmicutes	Bacilli	Lactobacillales	Lactobacillaceae			15.8426	16.0387	15.7241	14.3747	13.2897	13.5072	12.4653	12.9129	13.3296	15.0535	14.5579	15.5769	13.2991	13.2193	12.8352	14.2468	14.1717	13.0082	13.391	13.7681	13.0084	15.1079	12.9925	13.3538
AAASAALLAATSTIDK	Lachnospiraceae bacterium 28-4	Species	Bacteria		Firmicutes	Clostridia	Clostridiales	Lachnospiraceae		Lachnospiraceae bacterium 28-4	NA	NA	12.8926	NA	13.5383	14.2969	NA	12.3148	14.3129	NA	12.657	NA	NA	13.3632	12.2637	NA	14.6693	13.3332	14.1297	12.6578	NA	12.6369	14.2385	NA
AAASESFGYNEDPIVSSDVIGMK	Ruminococcus	Genus	Bacteria		Firmicutes	Clostridia	Clostridiales	Ruminococcaceae	Ruminococcus		NA	NA	NA	10.6606	NA	10.8359	11.1456	10.6636	NA	NA	NA	NA	11.2072	10.7078	11.1642	NA	11.3696	9.87214	10.9763	NA	10.2387	NA	NA	NA
AAASESFGYNEDPIVSSDVIGMR	Clostridiales	Order	Bacteria		Firmicutes	Clostridia	Clostridiales				NA	NA	NA	NA	9.01395	NA	NA	NA	NA	NA	NA	NA	NA	NA	10.21	NA	NA	NA	NA	NA	NA	NA	NA	NA
AAASESYGYNEDPIVSSDVIGMK	Enterocloster asparagiformis	Species	Bacteria		Firmicutes	Clostridia	Clostridiales	Lachnospiraceae	Enterocloster	Enterocloster asparagiformis	NA	10.7631	NA	NA	NA	NA	12.0461	10.3302	9.17935	NA	11.0232	10.2612	10.7873	11.1737	12.6364	10.9916	10.72	NA	13.4065	11.9027	11.2255	12.9217	10.3117	13.7372
AAASTDYYK	Chordata	Phylum	Eukaryota	Metazoa	Chordata						NA	12.6409	NA	12.7769	NA	NA	NA	NA	NA	NA	NA	NA	NA	NA	NA	NA	NA	NA	NA	NA	NA	NA	NA	NA
AAATESFGYNTDEIVSSDIVGMR	Clostridiales	Order	Bacteria		Firmicutes	Clostridia	Clostridiales				NA	NA	NA	NA	NA	NA	NA	9.75658	10.7441	NA	11.2529	NA	NA	NA	NA	NA	NA	NA	10.311	10.1417	NA	NA	NA	NA
AAATESFGYNTDEIVSSDVIGMR	Firmicutes	Phylum	Bacteria		Firmicutes						NA	NA	NA	NA	NA	NA	NA	NA	NA	NA	NA	NA	NA	9.24345	NA	NA	NA	NA	NA	NA	NA	NA	NA	NA
AAATFNPELITHILDGSPENTR	Rodentia	Order	Eukaryota	Metazoa	Chordata	Mammalia	Rodentia				NA	NA	NA	NA	NA	12.3307	NA	NA	NA	NA	NA	NA	11.4605	NA	NA	NA	NA	NA	NA	NA	NA	NA	NA	11.4062
AAATFNPELITHILDGSPENTRR	Rodentia	Order	Eukaryota	Metazoa	Chordata	Mammalia	Rodentia				NA	NA	NA	NA	NA	11.0631	NA	NA	NA	NA	NA	NA	NA	NA	NA	NA	NA	NA	NA	NA	NA	NA	NA	NA
AAATTVQEYLK	Mammalia	Class	Eukaryota	Metazoa	Chordata	Mammalia					15.5274	17.5241	16.9151	17.2831	15.3628	16.0692	13.1981	14.9051	14.6726	15.464	15.24	15.0388	16.0754	15.4303	16.0268	15.5606	15.6526	15.0044	15.7094	15.5159	14.2413	15.0399	15.9857	16.3422
AAAVNIVPNSTGAAK	Bacteria	Superkingdom	Bacteria								17.1595	13.9018	13.7614	15.1626	15.77	11.9683	18.1568	20.086	14.4088	14.1456	16.82	14.1888	19.5508	15.7954	21.813	14.3894	14.9886	15.2959	11.7188	16.3697	14.0441	13.8514	15.9293	12.3339
AAAVSMIPTSTGAAK	Bacteria	Superkingdom	Bacteria								14.8268	15.8165	15.6733	14.9527	15.4539	16.0924	16.7429	16.2582	14.0243	16.5078	14.4801	15.7854	15.4348	15.5333	15.513	14.7573	15.8399	17.3559	14.5899	15.7523	15.8057	16.8146	15.7881	16.6758
AACLESAQEPAGAWSNK	Rodentia	Order	Eukaryota	Metazoa	Chordata	Mammalia	Rodentia				NA	10.6793	NA	NA	NA	NA	NA	NA	NA	NA	NA	NA	NA	NA	NA	NA	NA	NA	NA	NA	NA	NA	NA	NA
AADAAAAIGEGLQAFCIPGSVADNR	Lachnospiraceae bacterium A4	Species	Bacteria		Firmicutes	Clostridia	Clostridiales	Lachnospiraceae		Lachnospiraceae bacterium A4	12.4225	10.0823	9.87037	10.0183	13.1197	11.9097	12.996	11.5287	10.8799	NA	11.8988	11.7808	11.8305	12.9656	10.0182	NA	11.0339	NA	12.0622	12.6654	NA	10.4766	12.321	NA
AADAAAAIGEGLQAFCIPGSVADNRK	Lachnospiraceae bacterium A4	Species	Bacteria		Firmicutes	Clostridia	Clostridiales	Lachnospiraceae		Lachnospiraceae bacterium A4	11.7696	NA	NA	NA	11.4429	10.9507	12.0127	NA	NA	NA	10.4122	12.026	10.5748	11.487	NA	NA	NA	NA	11.9828	11.8925	NA	10.9399	11.86	NA
AADAAAAIGEGLQAFCIPGSVADQR	Clostridiales	Order	Bacteria		Firmicutes	Clostridia	Clostridiales				10.6083	9.86074	9.6031	10.4553	13.0223	13.4097	12.848	NA	10.4006	10.114	10.9749	9.82487	13.1504	12.9922	NA	9.39073	10.9133	11.0827	NA	11.5219	9.28011	10.0417	12.0142	12.9481
AADAAAAIGEGLQAFCIPGSVADTR	Clostridiales	Order	Bacteria		Firmicutes	Clostridia	Clostridiales				12.0222	13.127	11.5223	13.0802	15.1363	14.0232	13.6864	12.7147	13.5609	11.6141	13.8691	13.0378	14.5227	15.1415	11.9007	12.8301	14.1951	12.5563	14.3272	13.5815	12.6391	12.1494	14.8011	13.1814
AADAAAAIGEGLQAFCIPGSVADTRK	Clostridiales	Order	Bacteria		Firmicutes	Clostridia	Clostridiales				NA	NA	NA	10.0622	10.9784	11.0381	NA	11.3647	NA	NA	NA	NA	NA	NA	NA	NA	10.2069	10.5238	11.3636	NA	NA	10.7033	10.6625	NA
AADAAAAIGEGLQAFCVPGSVADNR	Lachnospiraceae bacterium MD335	Species	Bacteria		Firmicutes	Clostridia	Clostridiales	Lachnospiraceae		Lachnospiraceae bacterium MD335	NA	NA	NA	NA	12.0982	NA	NA	NA	NA	NA	NA	NA	11.3572	12.0932	NA	NA	10.7992	NA	11.3572	NA	NA	NA	11.4482	NA
AADAAAAIGEGLQAFCVPGSVADNRK	Lachnospiraceae bacterium MD335	Species	Bacteria		Firmicutes	Clostridia	Clostridiales	Lachnospiraceae		Lachnospiraceae bacterium MD335	NA	NA	NA	NA	11.0315	NA	NA	NA	NA	NA	NA	NA	10.2133	10.9104	NA	NA	10.1039	NA	10.4898	NA	NA	NA	10.2771	NA
AADAAAAIGEGLQSFCIPGSVADQR	Clostridiales	Order	Bacteria		Firmicutes	Clostridia	Clostridiales				NA	NA	NA	NA	11.2212	NA	12.6988	10.5221	10.6237	NA	NA	9.46887	11.363	10.8483	9.83678	10.6561	11.0108	10.3462	10.4533	NA	NA	NA	9.89643	11.9326
AADAAAAIGEGLQSFCIPGSVADTR	Clostridiales	Order	Bacteria		Firmicutes	Clostridia	Clostridiales				NA	NA	NA	NA	11.904	NA	11.6092	NA	NA	NA	NA	NA	12.4776	12.8192	10.2919	12.1905	12.1421	NA	NA	NA	NA	11.575	NA	NA
AADAAAEPYPEDK	Mus musculus	Species	Eukaryota	Metazoa	Chordata	Mammalia	Rodentia	Muridae	Mus	Mus musculus	NA	10.0257	10.3346	NA	NA	NA	NA	NA	NA	NA	NA	NA	NA	NA	NA	NA	NA	NA	NA	NA	NA	NA	NA	NA
AADAAIIVCSAK	Clostridiales	Order	Bacteria		Firmicutes	Clostridia	Clostridiales				12.4662	12.6835	11.1435	12.8531	14.0735	13.8232	14.0438	12.7972	13.5744	10.9432	13.4217	12.6108	14.3663	14.0572	11.9205	12.4253	13.3306	12.0124	14.0442	12.8946	12.0877	12.2698	14.7079	13.4653
AADAAVIVCSAK	Oscillibacter	Genus	Bacteria		Firmicutes	Clostridia	Clostridiales	Oscillospiraceae	Oscillibacter		11.2416	11.0454	NA	10.0841	11.6893	NA	11.776	NA	12.535	NA	11.4509	NA	11.4071	12.0734	10.5124	NA	12.2057	12.1929	12.2302	11.768	NA	NA	12.9713	12.9157
AADAEAEVASLNR	Chordata	Phylum	Eukaryota	Metazoa	Chordata						NA	12.8608	12.5195	13.1934	NA	13.0577	NA	NA	NA	NA	NA	NA	NA	NA	NA	NA	NA	NA	11.5301	NA	NA	NA	NA	NA
AADAFGLAFAQK	Clostridiales	Order	Bacteria		Firmicutes	Clostridia	Clostridiales				10.6478	10.2498	NA	10.8652	11.8233	12.6792	12.1187	11.4727	11.953	11.9106	12.2756	11.6864	NA	12.0221	11.1509	11.1903	11.5383	11.2055	11.3894	11.9903	NA	12.3302	12.8501	12.3387
AADAVEDLR	Chordata	Phylum	Eukaryota	Metazoa	Chordata						13.4333	14.175	13.4053	13.7136	NA	14.0056	NA	NA	NA	12.661	13.1993	12.5412	NA	NA	13.0553	11.857	NA	13.6501	13.0724	12.7957	12.8325	NA	13.3228	13.4147
AADDAAGLAISEK	Bacteria	Superkingdom	Bacteria								18.7275	18.5679	19.2376	17.9423	19.9159	19.1447	18.4511	19.182	19.3526	18.4874	19.368	18.6228	20.2373	19.956	19.8757	19.1305	19.137	19.0815	19.9828	19.0352	18.6292	18.8702	20.0667	19.108
AADDAAGLAISEKMR	Bacteria	Superkingdom	Bacteria								NA	NA	NA	NA	11.3758	12.0957	10.9402	13.2059	10.8545	NA	11.1933	NA	11.8237	11.6282	NA	NA	NA	NA	12.4562	NA	11.0176	NA	12.081	10.7207
AADDAAGLAISER	Bacteria	Superkingdom	Bacteria								NA	NA	NA	NA	14.3352	11.8598	NA	NA	NA	NA	NA	NA	NA	14.0273	NA	NA	NA	NA	NA	NA	NA	NA	14.0445	NA
AADDAAGLSISEK	Bacteria	Superkingdom	Bacteria								20.6266	19.2327	18.7352	20.4603	21.0477	20.6266	20.8131	20.6741	20.498	19.3364	21.0306	20.8697	21.0306	NA	21.4309	20.6374	20.282	20.9653	21.0285	20.9994	20.3057	20.5042	20.8957	20.345
AADDAAGLSISEKMR	Bacteria	Superkingdom	Bacteria								NA	NA	NA	NA	NA	NA	NA	13.4096	11.3336	NA	NA	14.5626	11.7757	NA	NA	NA	NA	NA	12.8318	NA	10.4592	NA	11.3806	NA
AADDAAGLSISEKMRK	Clostridiales	Order	Bacteria		Firmicutes	Clostridia	Clostridiales				NA	NA	NA	NA	NA	NA	NA	12.6055	NA	NA	NA	NA	NA	NA	NA	NA	NA	NA	NA	NA	NA	NA	NA	NA
AADDAAGLSISEKMRR	Butyrivibrio proteoclasticus	Species	Bacteria		Firmicutes	Clostridia	Clostridiales	Lachnospiraceae	Butyrivibrio	Butyrivibrio proteoclasticus	NA	NA	NA	NA	NA	NA	NA	12.394	NA	NA	NA	NA	NA	NA	NA	NA	NA	NA	NA	NA	NA	NA	NA	NA
AADDAAGLSVSEK	Lachnospiraceae bacterium 28-4	Species	Bacteria		Firmicutes	Clostridia	Clostridiales	Lachnospiraceae		Lachnospiraceae bacterium 28-4	15.4122	17.2433	17.7004	14.9035	18.36	18.8492	16.6551	17.6084	18.3438	15.8043	17.7074	16.638	20.0092	18.5156	15.3835	14.5164	16.9729	17.4459	18.2967	16.8669	16.4699	15.5104	20.1904	16.3358
AADDAAGLSVSEKMR	Lachnospiraceae bacterium 28-4	Species	Bacteria		Firmicutes	Clostridia	Clostridiales	Lachnospiraceae		Lachnospiraceae bacterium 28-4	NA	NA	NA	NA	NA	NA	NA	NA	NA	NA	NA	NA	NA	NA	NA	NA	NA	NA	NA	NA	NA	NA	9.66324	NA
AADDAAGLTISEK	Bacteria	Superkingdom	Bacteria								16.2744	14.114	16.6294	12.8899	17.4673	15.6388	16.0205	16.9743	16.347	17.7321	15.5435	14.8678	18.9017	17.439	15.199	16.5504	15.2009	15.6287	17.6876	16.0476	15.4329	13.9037	16.8567	14.9386
AADEGDTGKMVVIDR	Clostridiales	Order	Bacteria		Firmicutes	Clostridia	Clostridiales				NA	NA	NA	NA	NA	10.3512	12.0307	NA	NA	9.07345	NA	NA	NA	NA	10.4185	NA	NA	10.7115	11.7156	11.5227	NA	NA	NA	NA
AADFAEIVK	Anaerotruncus sp. G3(2012)	Species	Bacteria		Firmicutes	Clostridia	Clostridiales	Ruminococcaceae	Anaerotruncus	Anaerotruncus sp. G3(2012)	NA	11.4415	NA	11.3671	NA	NA	NA	13.0798	NA	NA	NA	NA	NA	11.7257	NA	NA	NA	11.5308	12.3871	NA	11.6862	11.7805	13.1439	13.7211
AADFVVENAVEK	Lachnospiraceae bacterium MD335	Species	Bacteria		Firmicutes	Clostridia	Clostridiales	Lachnospiraceae		Lachnospiraceae bacterium MD335	11.3327	NA	NA	NA	12.397	NA	11.1883	NA	NA	NA	11.6897	NA	NA	12.6721	NA	NA	12.2188	NA	13.6245	12.4529	11.8888	11.5455	NA	NA
AADGGTAFCEFR	Lachnospiraceae bacterium A4	Species	Bacteria		Firmicutes	Clostridia	Clostridiales	Lachnospiraceae		Lachnospiraceae bacterium A4	NA	NA	NA	NA	11.0468	11.0468	11.1895	NA	11.2716	10.4593	NA	NA	NA	11.338	NA	NA	10.8168	11.0701	NA	NA	NA	11.2499	NA	NA
AADILGNTK	Lachnospiraceae bacterium 3-1	Species	Bacteria		Firmicutes	Clostridia	Clostridiales	Lachnospiraceae		Lachnospiraceae bacterium 3-1	NA	11.5782	12.5298	NA	NA	NA	NA	14.6045	NA	13.6886	NA	NA	NA	NA	NA	NA	15.8548	14.7102	NA	NA	NA	NA	NA	NA
AADKDTCFSTEGPNLVTR	Mus musculus	Species	Eukaryota	Metazoa	Chordata	Mammalia	Rodentia	Muridae	Mus	Mus musculus	NA	NA	NA	NA	12.3625	13.8079	NA	10.2597	12.3916	NA	NA	10.163	13.1122	11.6527	9.5533	NA	11.7245	10.122	12.7705	10.1386	NA	9.60767	12.9018	13.5681
AADKNFQQNIEK	Lachnospiraceae bacterium MD308	Species	Bacteria		Firmicutes	Clostridia	Clostridiales	Lachnospiraceae		Lachnospiraceae bacterium MD308	NA	NA	NA	NA	NA	NA	12.421	NA	12.2742	11.5829	NA	NA	NA	NA	NA	NA	14.3895	10.768	NA	NA	NA	NA	NA	NA
AADLDAIHDTVHEMAK	Clostridiales	Order	Bacteria		Firmicutes	Clostridia	Clostridiales				NA	NA	NA	NA	NA	NA	NA	13.2612	NA	NA	NA	NA	NA	NA	NA	NA	NA	NA	NA	NA	NA	NA	12.8488	NA
AADLLPIDWDK	Bacteroidia	Class	Bacteria		Bacteroidetes	Bacteroidia					12.8673	15.7617	15.6671	15.0981	13.0503	13.7494	11.3084	13.2489	13.8944	NA	14.2484	NA	13.9088	12.923	15.3785	13.3588	13.4578	12.5453	14.4147	13.3106	12.7965	NA	13.6897	14.6156
AADLLYAMCDR	Metazoa	Kingdom	Eukaryota	Metazoa							NA	10.3277	NA	10.6062	NA	11.1434	NA	NA	NA	NA	NA	NA	NA	NA	NA	NA	NA	NA	NA	NA	NA	NA	NA	NA
AADLQIQMTK	Mus musculus	Species	Eukaryota	Metazoa	Chordata	Mammalia	Rodentia	Muridae	Mus	Mus musculus	NA	NA	11.5011	11.8133	NA	12.567	NA	NA	NA	NA	NA	NA	NA	NA	NA	NA	NA	NA	NA	NA	NA	NA	NA	11.7702
AADLSGDFAK	Alistipes sp. CHKCI003	Species	Bacteria		Bacteroidetes	Bacteroidia	Bacteroidales	Rikenellaceae	Alistipes	Alistipes sp. CHKCI003	NA	NA	NA	15.1017	13.6656	13.8095	NA	13.5755	13.8405	12.3933	14.0488	12.614	14.6607	13.8454	NA	13.2607	NA	NA	14.9665	11.9798	12.6197	NA	13.9373	13.9341
AADMLSGPR	Chordata	Phylum	Eukaryota	Metazoa	Chordata						NA	12.2117	11.5904	NA	NA	NA	NA	NA	NA	NA	NA	NA	NA	NA	NA	NA	NA	NA	NA	NA	NA	NA	NA	NA
AADNAAGLAISEK	Lachnospiraceae	Family	Bacteria		Firmicutes	Clostridia	Clostridiales	Lachnospiraceae			18.6101	19.3794	19.6031	20.4041	20.7678	20.4044	18.9026	19.7542	19.8326	17.4305	19.6892	19.325	20.5312	20.6516	19.8562	21.2205	19.966	18.9114	20.3613	19.1527	19.0151	19.5442	20.6659	20.2442
AADNAAGLAISEKMR	Lachnospiraceae	Family	Bacteria		Firmicutes	Clostridia	Clostridiales	Lachnospiraceae			NA	NA	NA	NA	NA	12.2293	NA	NA	NA	NA	NA	12.2574	NA	NA	NA	NA	NA	NA	NA	NA	NA	NA	11.48	NA
AADNNLTAPMYLR	Alistipes	Genus	Bacteria		Bacteroidetes	Bacteroidia	Bacteroidales	Rikenellaceae	Alistipes		NA	NA	NA	NA	NA	10.6822	NA	NA	NA	NA	11.7782	NA	12.9807	NA	NA	NA	NA	NA	NA	NA	NA	NA	NA	NA
AADNPTVMLTVENNAQYNK	Lachnospiraceae bacterium MD335	Species	Bacteria		Firmicutes	Clostridia	Clostridiales	Lachnospiraceae		Lachnospiraceae bacterium MD335	NA	NA	7.24109	NA	10.2454	NA	9.37663	8.51284	NA	9.21709	8.80286	8.96187	10.8669	10.6572	9.95122	9.95452	11.3611	9.95452	10.5211	NA	9.20878	10.1477	9.95452	9.42437
AADTHLIDYEK	Rodentia	Order	Eukaryota	Metazoa	Chordata	Mammalia	Rodentia				10.7352	10.8981	10.9504	11.5214	NA	11.6697	NA	NA	11.3537	NA	11.2089	11.4371	10.2621	NA	NA	NA	NA	NA	10.6463	NA	NA	NA	11.1107	11.3815
AADVHEVR	Metazoa	Kingdom	Eukaryota	Metazoa							NA	NA	NA	NA	NA	NA	NA	NA	NA	NA	NA	NA	NA	NA	11.6137	NA	NA	NA	NA	NA	NA	NA	NA	NA
AADVHEVRK	Metazoa	Kingdom	Eukaryota	Metazoa							NA	10.5123	9.14069	10.4562	NA	NA	NA	NA	NA	NA	NA	NA	NA	NA	9.56181	NA	9.08999	NA	NA	NA	NA	8.7938	NA	NA
AAEAAEETFDCTGSDGK	Lachnospiraceae bacterium MD335	Species	Bacteria		Firmicutes	Clostridia	Clostridiales	Lachnospiraceae		Lachnospiraceae bacterium MD335	10.2082	NA	13.2135	NA	12.4587	10.3368	10.5626	10.5442	11.9727	12.5182	12.3538	12.4515	12.367	12.4549	8.54944	12.6649	13.6398	11.3017	12.8909	11.9784	12.0147	11.5766	12.2119	11.3435
AAEADYQENVNK	Lachnospiraceae bacterium A2	Species	Bacteria		Firmicutes	Clostridia	Clostridiales	Lachnospiraceae		Lachnospiraceae bacterium A2	NA	NA	15.4007	NA	14.2072	13.5909	14.2533	16.027	12.279	NA	NA	NA	NA	14.6251	NA	17.0249	10.8785	13.9852	10.2175	13.2695	11.7447	NA	NA	NA
AAEADYQENVNKDFK	Lachnospiraceae bacterium A2	Species	Bacteria		Firmicutes	Clostridia	Clostridiales	Lachnospiraceae		Lachnospiraceae bacterium A2	NA	NA	12.9798	NA	13.8844	13.8151	14.6282	15.5894	11.2728	NA	NA	NA	12.1958	14.3828	11.3995	16.639	NA	14.02	NA	13.0431	16.2351	NA	12.4325	NA
AAEAEVQAEAKPAPK	Lachnospiraceae bacterium MD335	Species	Bacteria		Firmicutes	Clostridia	Clostridiales	Lachnospiraceae		Lachnospiraceae bacterium MD335	NA	NA	9.54763	NA	11.0485	NA	NA	NA	NA	NA	9.94153	NA	10.7753	11.3226	11.8867	NA	NA	NA	13.3135	NA	NA	NA	11.3055	11.9984
AAEAFSELSK	Chordata	Phylum	Eukaryota	Metazoa	Chordata						12.9997	14.3807	14.1472	14.5877	NA	14.1136	11.8611	NA	12.0063	12.3092	12.8101	NA	NA	NA	12.6074	NA	11.7212	12.9134	13.6607	12.8206	12.021	NA	NA	13.4266
AAEAFSELSKR	Chordata	Phylum	Eukaryota	Metazoa	Chordata						NA	NA	NA	NA	NA	11.4531	NA	NA	NA	NA	NA	NA	NA	NA	NA	NA	NA	NA	10.7067	NA	NA	NA	NA	11.2369
AAEALDAAKK	Rodentia	Order	Eukaryota	Metazoa	Chordata	Mammalia	Rodentia				16.8793	17.9913	18.9261	18.0551	18.4351	17.456	17.4361	17.2749	NA	18.281	17.1217	NA	NA	17.0097	17.3699	18.0372	16.7714	18.041	17.0027	17.5661	NA	18.7377	NA	17.7983
AAECNIVVTQPR	Chordata	Phylum	Eukaryota	Metazoa	Chordata						10.7048	12.3464	11.4935	10.8537	NA	11.9014	NA	NA	NA	NA	NA	NA	NA	NA	NA	NA	NA	NA	11.1123	NA	NA	NA	NA	NA
AAEDLFVNIR	Chordata	Phylum	Eukaryota	Metazoa	Chordata						NA	NA	NA	NA	NA	11.2171	NA	NA	NA	NA	NA	NA	NA	NA	NA	NA	NA	9.77312	NA	NA	NA	NA	NA	NA
AAEDMVLK	Myxococcus xanthus	Species	Bacteria		Proteobacteria	Deltaproteobacteria	Myxococcales	Myxococcaceae	Myxococcus	Myxococcus xanthus	12.6559	13.7873	13.4478	14.0549	12.6577	NA	NA	NA	NA	NA	13.9693	NA	NA	12.9601	12.6942	NA	NA	NA	14.0051	NA	NA	NA	NA	NA
AAEDVIVK	Lachnospiraceae bacterium MD335	Species	Bacteria		Firmicutes	Clostridia	Clostridiales	Lachnospiraceae		Lachnospiraceae bacterium MD335	NA	NA	13.5765	NA	12.9037	NA	11.6598	13.9378	12.9436	13.5166	12.6906	14.3383	13.0513	12.781	12.6451	13.6407	14.4844	12.105	13.7977	12.6366	12.1113	13.0677	13.3275	NA
AAEEFNGNNYWK	Mus musculus	Species	Eukaryota	Metazoa	Chordata	Mammalia	Rodentia	Muridae	Mus	Mus musculus	NA	NA	NA	NA	NA	NA	NA	10.5676	NA	NA	NA	NA	NA	10.9267	NA	NA	NA	NA	NA	NA	11.4764	NA	NA	NA
AAEESLVLLK	Bacteria	Superkingdom	Bacteria								11.4651	NA	12.0052	10.6149	NA	13.159	11.1308	NA	11.3221	10.5854	11.2912	NA	11.5449	NA	11.7971	10.2647	NA	11.1843	NA	10.5598	NA	NA	10.5371	12.2728
AAEGDDSTAKIDQVK	Lachnospiraceae bacterium A4	Species	Bacteria		Firmicutes	Clostridia	Clostridiales	Lachnospiraceae		Lachnospiraceae bacterium A4	10.5165	NA	NA	NA	11.2984	11.2892	11.4457	NA	NA	NA	NA	NA	NA	11.4457	NA	NA	NA	NA	NA	NA	NA	NA	NA	NA
AAEIEAYLK	Lachnospiraceae bacterium MD335	Species	Bacteria		Firmicutes	Clostridia	Clostridiales	Lachnospiraceae		Lachnospiraceae bacterium MD335	NA	NA	NA	NA	11.0325	NA	NA	NA	NA	NA	NA	11.0816	NA	NA	NA	11.4235	NA	NA	10.71	NA	11.3725	10.4815	11.2624	NA
AAEILGNR	Celeribacter baekdonensis	Species	Bacteria		Proteobacteria	Alphaproteobacteria	Rhodobacterales	Rhodobacteraceae	Celeribacter	Celeribacter baekdonensis	NA	NA	NA	17.0915	14.5632	14.6651	NA	16.934	14.5632	13.8101	NA	NA	13.3608	14.4874	NA	14.061	NA	12.0561	NA	NA	NA	NA	14.6053	17
AAEIPDAIR	Clostridia	Class	Bacteria		Firmicutes	Clostridia					13.5668	13.3247	13.0818	13.1771	13.335	14.5962	14.1955	NA	13.5277	14.097	12.6627	13.7413	NA	13.3841	13.6354	13.8758	12.4822	13.608	13.192	13.8978	14.5105	12.3863	13.9371	15.2663
AAEIPDAIRK	Clostridia	Class	Bacteria		Firmicutes	Clostridia					NA	NA	NA	NA	NA	14.6704	NA	13.1351	NA	NA	NA	12.6582	13.2215	NA	NA	NA	NA	NA	NA	NA	13.9653	NA	13.9183	NA
AAEIPEAIR	Clostridia	Class	Bacteria		Firmicutes	Clostridia					16.288	16.7621	16.8652	16.8242	17.1675	17.0751	16.8133	17.1585	18.1281	16.0259	17.2887	15.6531	15.9805	17.2514	16.6644	17.2348	17.1815	16.6975	17.29	16.3451	16.7542	16.596	16.4537	16.1051
AAEIPEAIRK	Clostridia	Class	Bacteria		Firmicutes	Clostridia					NA	NA	NA	NA	NA	NA	NA	15.8518	14.2783	NA	NA	14.3667	16.7897	NA	NA	NA	NA	15.2758	16.4088	NA	15.9989	NA	17.444	17.1199
AAELAQLHTAYR	Ruminococcaceae bacterium D16	Species	Bacteria		Firmicutes	Clostridia	Clostridiales	Ruminococcaceae		Ruminococcaceae bacterium D16	NA	NA	NA	NA	NA	11.1872	NA	NA	NA	NA	NA	10.9028	10.9947	NA	NA	NA	NA	NA	NA	NA	NA	NA	11.6953	NA
AAELAVCK	Firmicutes	Phylum	Bacteria		Firmicutes						NA	NA	11.8864	NA	14.3662	13.8017	13.5558	12.83	14.8233	12.6432	13.2913	14.102	13.6488	14.4773	NA	13.1852	13.027	13.0026	14.6718	13.8777	12.1916	12.4464	13.7195	12.8458
AAELGVELK	Bacteria	Superkingdom	Bacteria								11.9453	10.9836	NA	11.567	12.6618	13.239	13.0088	12.865	12.3676	NA	12.4293	12.5688	NA	13.034	12.7944	11.4726	11.5855	12.3805	12.7449	12.1562	11.7687	12.5716	13.9393	NA
AAELGYIDEIIEPSVTRPK	Mucispirillum schaedleri	Species	Bacteria		Deferribacteres	Deferribacteres	Deferribacterales	Deferribacteraceae	Mucispirillum	Mucispirillum schaedleri	NA	NA	NA	NA	11.9009	NA	NA	NA	NA	NA	NA	NA	11.7093	11.2164	11.6084	NA	NA	NA	NA	NA	NA	NA	NA	12.2038
AAELIANSLATAGDGLIELR	Chordata	Phylum	Eukaryota	Metazoa	Chordata						10.1232	11.3441	10.6613	10.2495	NA	11.9012	NA	NA	NA	NA	NA	NA	NA	NA	NA	NA	NA	NA	10.0447	NA	NA	NA	NA	11.3405
AAEPFFK	Bacteria	Superkingdom	Bacteria								14.4755	NA	NA	NA	15.5265	NA	NA	15.2502	14.8767	13.9284	NA	NA	NA	15.3367	13.1467	NA	NA	NA	NA	NA	NA	NA	14.3712	NA
AAEQAASDLR	Mammalia	Class	Eukaryota	Metazoa	Chordata	Mammalia					13.5028	15.4071	14.6751	14.9868	NA	13.9818	NA	NA	NA	11.0669	12.4147	NA	NA	11.6925	NA	NA	NA	12.7561	13.2642	12.5537	NA	NA	NA	13.2003
AAEQTLSQR	Mus musculus	Species	Eukaryota	Metazoa	Chordata	Mammalia	Rodentia	Muridae	Mus	Mus musculus	11.2094	NA	11.8458	NA	NA	NA	NA	NA	NA	NA	NA	NA	NA	NA	NA	NA	NA	11.765	12.9743	11.954	NA	NA	NA	12.8216
AAESLADPTEYENLFPGLK	Metazoa	Kingdom	Eukaryota	Metazoa							9.80149	10.7556	10.6999	10.7875	NA	10.7278	NA	NA	NA	NA	NA	NA	NA	NA	NA	NA	NA	NA	NA	NA	NA	NA	NA	9.66896
AAEVAEAIR	Caulobacter sp. Root1455	Species	Bacteria		Proteobacteria	Alphaproteobacteria	Caulobacterales	Caulobacteraceae	Caulobacter	Caulobacter sp. Root1455	13.7169	14.1349	13.323	14.7972	14.0061	15.4727	14.1063	15.3191	14.0828	NA	NA	13.0131	14.2676	13.982	14.2201	13.8693	13.3282	13.9936	14.2631	NA	NA	NA	14.5222	16.8251
AAEVPDAIR	Bacteria	Superkingdom	Bacteria								NA	NA	NA	NA	NA	14.9761	NA	NA	NA	NA	NA	NA	NA	NA	NA	NA	NA	NA	13.0538	NA	NA	NA	NA	15.642
AAEVPDAIRK	Bacteria	Superkingdom	Bacteria								14.423	NA	NA	NA	15.1235	15.4849	15.458	14.7349	14.7487	NA	13.7215	NA	15.0013	15.0882	15.2492	14.6669	14.3588	NA	14.9766	13.8981	NA	14.0616	15.0794	16.3059
AAEVPEAIR	Bacteria	Superkingdom	Bacteria								16.459	15.8708	16.2386	15.6926	17.5131	17.1994	16.9534	16.4917	16.8125	15.3251	16.8072	15.7457	17.412	17.5043	17.6209	16.5926	16.6612	16.4654	17.0299	16.4623	15.7277	15.495	17.3216	16.6382
AAEVPEAIRK	Bacteria	Superkingdom	Bacteria								15.1469	14.9521	14.8786	15.126	16.504	16.359	16.4993	15.3009	16.3064	14.46	15.6154	15.5945	17.8851	16.5551	17.2076	15.1773	15.0878	15.8238	17.1896	16.2014	15.7709	14.4877	17.0803	16.7755
AAEVQDPATGR	Lachnospiraceae bacterium MD335	Species	Bacteria		Firmicutes	Clostridia	Clostridiales	Lachnospiraceae		Lachnospiraceae bacterium MD335	11.8498	NA	NA	NA	12.7836	NA	12.1638	NA	NA	11.5971	12.3489	NA	NA	12.7125	10.4443	13.4866	13.3638	12.117	12.9202	12.4884	NA	12.1935	NA	NA
AAEVQDPATGRK	Lachnospiraceae bacterium MD335	Species	Bacteria		Firmicutes	Clostridia	Clostridiales	Lachnospiraceae		Lachnospiraceae bacterium MD335	9.95328	NA	NA	NA	10.7956	10.5251	11.1828	NA	10.4197	NA	11.4337	11.688	11.1384	NA	11.9083	11.4955	NA	10.3655	12.1722	11.5548	10.752	NA	NA	10.7526
AAEYAALQTSATGAAR	Lachnospiraceae	Family	Bacteria		Firmicutes	Clostridia	Clostridiales	Lachnospiraceae			12.6553	NA	13.1413	10.8236	15.6538	14.3038	15.6677	12.6383	14.0796	12.9037	13.146	11.5272	14.1735	15.877	13.9417	14.1367	14.3663	14.0207	15.3186	13.7412	12.6669	14.3217	15.0354	13.8995
AAEYPIHYDWGK	Clostridium saccharolyticum	Species	Bacteria		Firmicutes	Clostridia	Clostridiales	Lachnospiraceae	Lacrimispora	Clostridium saccharolyticum	NA	NA	NA	NA	10.3455	10.9081	11.2156	NA	10.8727	NA	NA	11.3557	12.0289	11.0359	11.3483	11.5045	11.0888	12.2862	11.5451	11.3716	11.5678	11.2921	10.5941	11.2356
AAFDDAIAELDTLSEESYK	Eukaryota	Superkingdom	Eukaryota								6.7546	10.8899	10.6589	9.7307	NA	9.09583	NA	NA	NA	NA	NA	NA	9.50621	8.54714	8.90608	NA	8.05328	NA	9.74444	NA	NA	NA	8.98536	9.20965
AAFDHNYAK	Bacteroidales	Order	Bacteria		Bacteroidetes	Bacteroidia	Bacteroidales				14.3859	13.7397	14.3767	13.4601	14.0415	12.8514	NA	12.8604	13.4167	NA	14.392	NA	13.8988	13.7458	13.7568	NA	NA	NA	14.1727	12.6687	12.9591	NA	11.8548	13.4018
AAFDKNYAK	Bacteroidetes	Phylum	Bacteria		Bacteroidetes						13.5271	11.7196	NA	NA	13.2451	12.9817	11.2745	NA	NA	NA	13.8298	NA	NA	NA	13.0738	NA	NA	NA	13.1326	12.5543	NA	NA	12.7549	12.9902
AAFEAGVR	Bacteria	Superkingdom	Bacteria								14.1397	13.3988	14.5079	NA	15.1058	13.7543	15.273	14.1184	15.0873	14.5067	14.6016	14.1255	14.6087	15.2228	15.1274	14.4939	15.5976	14.2263	14.599	13.9751	13.6483	15.0444	15.7099	14.3703
AAFEAGWR	Collinsella	Genus	Bacteria		Actinobacteria	Coriobacteriia	Coriobacteriales	Coriobacteriaceae	Collinsella		NA	14.2147	11.6493	13.1803	12.565	15.1066	12.597	13.8071	13.2985	11.9935	11.8211	NA	13.2562	13.6682	NA	NA	13.1092	12.9653	14.8933	NA	NA	NA	NA	NA
AAFEEAEHAAK	Firmicutes	Phylum	Bacteria		Firmicutes						NA	NA	NA	NA	NA	18.9639	19.3117	19.0691	NA	NA	NA	17.1888	18.8404	18.1129	NA	NA	NA	NA	NA	NA	18.3788	NA	18.6116	19.5898
AAFEGDTGK	Lachnospiraceae bacterium MD335	Species	Bacteria		Firmicutes	Clostridia	Clostridiales	Lachnospiraceae		Lachnospiraceae bacterium MD335	NA	NA	NA	NA	NA	NA	NA	NA	NA	NA	NA	NA	NA	NA	NA	NA	NA	NA	NA	13.0986	NA	12.1951	NA	NA
AAFGLSEAGFNTACLTK	Rodentia	Order	Eukaryota	Metazoa	Chordata	Mammalia	Rodentia				NA	12.9112	11.8476	12.4986	11.4096	13.3051	NA	NA	NA	NA	10.5875	NA	11.6457	11.4376	NA	NA	NA	12.1323	11.6651	11.2107	NA	NA	12.1491	11.8005
AAFGVILITTK	Bacteroidetes	Phylum	Bacteria		Bacteroidetes						NA	NA	NA	NA	NA	NA	NA	9.74152	NA	NA	NA	NA	NA	NA	NA	NA	NA	NA	NA	NA	NA	NA	NA	NA
AAFLEQIKPQAQK	Lachnospiraceae bacterium MD335	Species	Bacteria		Firmicutes	Clostridia	Clostridiales	Lachnospiraceae		Lachnospiraceae bacterium MD335	NA	NA	NA	NA	11.1586	NA	NA	NA	NA	NA	NA	NA	11.9092	10.6348	11.2261	NA	NA	NA	NA	NA	10.1747	NA	10.8735	11.101
AAFLSEQLQPLSR	Mus musculus	Species	Eukaryota	Metazoa	Chordata	Mammalia	Rodentia	Muridae	Mus	Mus musculus	10.3238	13.2351	11.1805	12.8774	11.5331	12.1849	NA	11.1645	11.5542	9.74476	9.97726	NA	12.4079	11.3995	11.7387	11.5263	NA	11.5224	11.4571	11.0468	NA	NA	12.4309	12.5029
AAFQLGSPWR	Chordata	Phylum	Eukaryota	Metazoa	Chordata						13.7076	15.5327	15.2062	15.1113	13.5088	14.9802	11.8346	13.5929	13.6513	12.8821	13.2494	13.9445	14.4566	12.9015	14.256	13.6228	13.6444	14.4686	14.0686	13.7185	12.8271	13.3625	14.5347	13.9178
AAFSLDSK	Clostridiales	Order	Bacteria		Firmicutes	Clostridia	Clostridiales				13.8522	12.7904	13.9344	11.6711	15.1196	15.1529	15.5971	15.3241	13.035	NA	NA	12.3341	14.5485	15.3003	15.028	13.9206	14.7851	NA	15.5097	13.9872	14.8704	14.2217	15.8839	16.2147
AAFSLDSKEPTGDYK	Lachnospiraceae bacterium A2	Species	Bacteria		Firmicutes	Clostridia	Clostridiales	Lachnospiraceae		Lachnospiraceae bacterium A2	NA	NA	NA	NA	11.4092	12.0825	13.7082	11.0265	NA	NA	NA	NA	10.1196	11.934	NA	11.2595	NA	NA	NA	NA	11.7615	NA	NA	NA
AAFTMFSR	Rodentia	Order	Eukaryota	Metazoa	Chordata	Mammalia	Rodentia				10.4531	11.4398	NA	10.9296	NA	12.6236	NA	11.2982	11.4633	10.0785	11.4398	NA	12.0306	NA	NA	NA	NA	11.9606	11.3884	11.3188	NA	NA	11.4163	11.5509
AAFVASGHR	Eubacterium plexicaudatum	Species	Bacteria		Firmicutes	Clostridia	Clostridiales	Eubacteriaceae	Eubacterium	Eubacterium plexicaudatum	12.9116	NA	NA	NA	12.6719	13.2974	NA	NA	NA	NA	NA	NA	NA	12.594	NA	12.8317	NA	NA	13.9227	NA	NA	13.2769	NA	NA
AAFVDNWAAEK	Oscillibacter	Genus	Bacteria		Firmicutes	Clostridia	Clostridiales	Oscillospiraceae	Oscillibacter		13.5159	14.4494	12.9179	14.5963	14.7849	16.7007	14.3467	14.378	13.667	14.6087	14.8102	12.184	14.6301	14.8222	15.0269	14.4449	12.8947	14.9266	14.1761	13.7562	14.6377	15.2804	14.6622	16.8912
AAGAAGVIRPSK	Clostridiales	Order	Bacteria		Firmicutes	Clostridia	Clostridiales				NA	NA	NA	11.3668	NA	NA	NA	NA	NA	NA	NA	NA	NA	NA	NA	NA	NA	NA	NA	NA	NA	NA	9.1282	13.3298
AAGADQAVLTLK	Lachnospiraceae bacterium M18-1	Species	Bacteria		Firmicutes	Clostridia	Clostridiales	Lachnospiraceae		Lachnospiraceae bacterium M18-1	NA	10.0298	NA	NA	12.3855	NA	11.5251	NA	NA	NA	NA	NA	11.9682	12.2298	12.8256	11.2508	NA	NA	NA	NA	NA	NA	10.8116	NA
AAGADYVGEMDLVEK	Clostridiales	Order	Bacteria		Firmicutes	Clostridia	Clostridiales				12.8869	NA	11.3473	NA	13.4717	11.897	12.9459	11.6951	11.8687	NA	12.1299	NA	14.5374	13.3831	13.5082	NA	NA	NA	13.8362	12.508	11.0967	NA	13.6119	12.3671
AAGADYVGLDEYIEK	Bacteroidetes	Phylum	Bacteria		Bacteroidetes						13.9374	16.1817	15.6865	16.5444	14.3877	13.3394	11.1213	12.3024	12.8194	9.75348	15.1736	12.1423	16.8343	14.5155	15.1607	11.9961	12.6524	11.2936	15.8726	13.1435	12.7943	NA	15.2426	15.1369
AAGAEEYAQQEVVK	Chordata	Phylum	Eukaryota	Metazoa	Chordata						NA	NA	9.79262	NA	NA	NA	NA	NA	NA	NA	NA	NA	NA	NA	NA	NA	NA	NA	NA	NA	NA	NA	NA	NA
AAGDYEGLQLLPK	Bacteroides	Genus	Bacteria		Bacteroidetes	Bacteroidia	Bacteroidales	Bacteroidaceae	Bacteroides		14.4135	16.2497	15.8676	16.0695	14.1753	13.3751	11.8023	13.6719	13.8557	10.0672	15.0815	NA	15.1122	14.4051	15.0763	14.2172	13.5648	11.9235	15.5981	14.2462	13.2421	10.4652	14.4569	15.5354
AAGFENLK	Bacteria	Superkingdom	Bacteria								13.0296	12.3698	12.9919	12.4582	14.5373	14.9629	14.4359	13.9539	14.3583	13.407	13.0022	12.902	14.2598	14.6717	NA	14.1615	14.2759	13.9433	13.2002	13.3399	12.5832	13.6137	14.2975	14.5948
AAGGNIIPSSTGAAK	Bacteria	Superkingdom	Bacteria								15.028	15.0418	15.4862	15.4378	NA	14.5863	13.1737	NA	NA	NA	14.6419	NA	16.1246	NA	15.5228	13.061	NA	NA	15.1238	14.2916	12.8909	NA	14.4228	15.1488
AAGGVLDADTK	Lactobacillaceae	Family	Bacteria		Firmicutes	Bacilli	Lactobacillales	Lactobacillaceae			15.6541	15.5317	15.1969	14.1515	NA	NA	NA	14.3483	13.4163	14.2315	13.9148	14.7416	12.0084	NA	NA	13.2701	13.6441	12.6555	12.4617	14.3358	12.7706	13.2439	11.9592	12.8098
AAGGYELEGK	Lachnospiraceae	Family	Bacteria		Firmicutes	Clostridia	Clostridiales	Lachnospiraceae			NA	12.6718	NA	14.1253	14.3297	14.7481	15.4468	15.9676	14.1609	12.7894	13.4486	13.72	NA	14.5454	14.2635	14.2477	13.5112	14.5164	NA	NA	NA	NA	14.4534	14.857
AAGIALTDTFVK	Alistipes shahii	Species	Bacteria		Bacteroidetes	Bacteroidia	Bacteroidales	Rikenellaceae	Alistipes	Alistipes shahii	NA	NA	NA	NA	NA	20.5775	NA	17.8372	NA	NA	NA	NA	16.5376	NA	NA	NA	NA	NA	NA	NA	NA	NA	NA	NA
AAGIDQVFVQDNQSASK	Lachnospiraceae bacterium MD335	Species	Bacteria		Firmicutes	Clostridia	Clostridiales	Lachnospiraceae		Lachnospiraceae bacterium MD335	11.116	NA	10.4484	NA	11.8817	10.8053	11.0344	NA	10.944	11.3498	11.5785	12.0526	11.6113	11.6439	11.3131	12.3436	11.8798	12.0612	11.9378	12.0069	12.1461	11.5146	11.6964	11.6467
AAGIPVIAYDR	Actinobacteria	Class	Bacteria		Actinobacteria	Actinobacteria					15.6691	NA	15.086	NA	15.5648	13.9883	16.6622	13.2282	NA	14.9505	15.437	15.8251	NA	15.8047	16.4361	NA	15.8976	15.8897	15.9892	14.7374	16.6684	17.2027	16.8663	NA
AAGLDPETPPK	Rhizobiales	Order	Bacteria		Proteobacteria	Alphaproteobacteria	Rhizobiales				NA	NA	NA	12.0783	NA	NA	NA	NA	NA	NA	12.0776	11.9683	12.8249	NA	NA	NA	NA	NA	NA	NA	NA	NA	NA	NA
AAGLDVYADEPATNK	Firmicutes	Phylum	Bacteria		Firmicutes						11.0462	8.98399	10.5069	9.25126	12.8498	11.3849	12.7638	NA	11.11	NA	12.2386	10.2191	14.482	13.0802	12.4067	10.5405	10.0951	11.4799	13.8335	12.1117	NA	9.89476	13.8111	NA
AAGLIPWK	Pseudoramibacter alactolyticus	Species	Bacteria		Firmicutes	Clostridia	Clostridiales	Eubacteriaceae	Pseudoramibacter	Pseudoramibacter alactolyticus	NA	NA	NA	12.2783	11.0527	11.2742	NA	12.8492	12.0663	13.0847	10.6708	11.1948	NA	NA	NA	10.7824	12.131	10.969	11.685	11.4831	9.52423	10.3582	NA	NA
AAGNVSTTLNVK	Lachnospiraceae bacterium A2	Species	Bacteria		Firmicutes	Clostridia	Clostridiales	Lachnospiraceae		Lachnospiraceae bacterium A2	NA	NA	14.8468	NA	NA	NA	NA	NA	NA	NA	NA	NA	NA	NA	NA	14.3278	NA	NA	NA	NA	14.069	NA	NA	NA
AAGSGELGVTVK	Mammalia	Class	Eukaryota	Metazoa	Chordata	Mammalia					13.7206	NA	14.7775	15.8132	14.3645	15.431	11.7453	14.3097	14.1484	12.9108	13.3011	14.0136	15.3336	14.2807	14.1121	15.0282	NA	14.7832	13.9217	14.3967	NA	13.8726	15.2969	14.6633
AAGTFTTNVVK	Clostridiales	Order	Bacteria		Firmicutes	Clostridia	Clostridiales				13.3728	11.5473	NA	12.1494	13.2823	13.0156	13.9832	NA	13.1055	12.3269	12.8164	NA	13.3379	13.1899	13.3986	13.1279	12.5851	12.7621	NA	NA	NA	12.7488	12.9376	NA
AAGTLYTYPENWR	Metazoa	Kingdom	Eukaryota	Metazoa							12.4712	15.0953	14.5598	14.5949	NA	12.618	NA	NA	NA	NA	10.9762	NA	12.2765	NA	12.0867	NA	NA	11.0447	11.9023	NA	NA	NA	12.3343	11.3255
AAGTVAEAYK	Lachnospiraceae bacterium A4	Species	Bacteria		Firmicutes	Clostridia	Clostridiales	Lachnospiraceae		Lachnospiraceae bacterium A4	14.6048	14.2094	13.3782	14.2345	15.0113	15.6735	15.8201	NA	15.5235	14.6066	14.9263	12.8184	14.4753	15.0837	13.3994	14.9808	14.1316	15.1191	15.1593	15.9737	15.7011	15.0577	NA	15.3478
AAGVSVQNVSGTFGTAPK	Bacteroidetes	Phylum	Bacteria		Bacteroidetes						11.0905	10.0572	10.5007	10.0259	NA	NA	NA	NA	NA	NA	10.2766	NA	NA	NA	10.9262	NA	NA	NA	10.8117	NA	NA	NA	NA	12.0611
AAGWSEIK	Blastopirellula marina	Species	Bacteria		Planctomycetes	Planctomycetia	Pirellulales	Pirellulaceae	Blastopirellula	Blastopirellula marina	NA	NA	NA	14.1739	12.9998	13.7459	14.5798	13.9575	NA	NA	NA	NA	NA	12.7271	14.1131	13.8533	NA	13.0274	NA	13.5322	12.9837	14.2442	NA	NA
AAGWSELSER	Mammalia	Class	Eukaryota	Metazoa	Chordata	Mammalia					NA	NA	NA	NA	NA	NA	NA	NA	12.4214	NA	NA	12.1657	NA	NA	NA	NA	NA	NA	NA	NA	NA	NA	NA	12.2728
AAGYDNLK	Firmicutes	Phylum	Bacteria		Firmicutes						13.4231	11.9801	NA	12.5932	14.8039	14.4357	14.5851	NA	NA	12.1187	13.8944	NA	NA	14.9207	15.066	14.0828	13.9861	14.3827	14.5277	13.5381	NA	13.0645	NA	13.2942
AAGYTGEYITDKDR	Clostridiales	Order	Bacteria		Firmicutes	Clostridia	Clostridiales				NA	NA	NA	NA	NA	13.5453	13.202	12.9363	12.3762	NA	NA	12.8043	13.3416	NA	NA	12.9088	NA	12.3058	13.5708	12.012	13.4025	NA	11.8211	13.0131
AAHSIDTLGSASAR	Mus musculus	Species	Eukaryota	Metazoa	Chordata	Mammalia	Rodentia	Muridae	Mus	Mus musculus	NA	NA	NA	NA	NA	13.1223	NA	NA	NA	NA	11.8176	NA	NA	NA	NA	NA	NA	12.5758	11.9577	11.4935	NA	NA	NA	12.7788
AAIAEGIVPGGGVAYIR	Bacteroidales	Order	Bacteria		Bacteroidetes	Bacteroidia	Bacteroidales				15.6024	16.8349	16.5182	16.1295	14.71	14.3277	13.2926	14.2027	14.985	13.5783	17.1028	14.1055	16.3362	14.7653	15.7103	13.4171	15.2602	13.6213	16.8793	14.7857	15.1763	NA	15.4214	15.6175
AAIANFAK	Acetobacter cibinongensis	Species	Bacteria		Proteobacteria	Alphaproteobacteria	Rhodospirillales	Acetobacteraceae	Acetobacter	Acetobacter cibinongensis	13.0165	NA	NA	NA	NA	NA	12.6291	NA	NA	NA	NA	12.939	NA	NA	NA	NA	NA	NA	NA	12.8616	NA	NA	NA	NA
AAIDALELVK	Lachnospiraceae bacterium A4	Species	Bacteria		Firmicutes	Clostridia	Clostridiales	Lachnospiraceae		Lachnospiraceae bacterium A4	NA	NA	NA	NA	12.8709	12.145	13.0779	NA	NA	NA	NA	NA	NA	12.8644	NA	NA	11.9215	11.6575	NA	NA	NA	12.1623	12.3724	NA
AAIDEAMK	Bacteria	Superkingdom	Bacteria								NA	NA	NA	NA	12.1481	11.9994	11.6493	11.9702	NA	NA	NA	NA	NA	12.0043	NA	NA	11.5597	NA	NA	NA	NA	NA	NA	NA
AAIDFITSEEVLK	Clostridiales	Order	Bacteria		Firmicutes	Clostridia	Clostridiales				14.3228	NA	NA	NA	NA	NA	15.1726	NA	NA	NA	13.6621	15.0086	NA	NA	NA	NA	NA	NA	12.9116	15.2778	NA	NA	NA	NA
AAIDTVNTAIDSISSMR	Lachnospiraceae bacterium M18-1	Species	Bacteria		Firmicutes	Clostridia	Clostridiales	Lachnospiraceae		Lachnospiraceae bacterium M18-1	NA	NA	NA	NA	11.7327	10.5552	NA	NA	12.0561	NA	NA	NA	12.4654	11.7478	NA	NA	11.6667	12.2672	NA	NA	NA	11.2174	12.1234	15.9397
AAIEAAVSK	Streptococcus mitis	Species	Bacteria		Firmicutes	Bacilli	Lactobacillales	Streptococcaceae	Streptococcus	Streptococcus mitis	NA	NA	NA	NA	NA	NA	NA	NA	NA	12.5628	NA	12.9389	NA	NA	NA	NA	NA	NA	NA	NA	NA	NA	NA	NA
AAIEAGIAVYNR	Ruminococcus	Genus	Bacteria		Firmicutes	Clostridia	Clostridiales	Ruminococcaceae	Ruminococcus		NA	NA	NA	NA	11.2031	11.5549	11.2583	10.5077	NA	NA	NA	NA	11.4701	11.5565	11.4313	NA	11.7942	NA	12.8034	NA	NA	NA	NA	NA
AAIEAGISVYNR	Clostridiales	Order	Bacteria		Firmicutes	Clostridia	Clostridiales				NA	NA	NA	NA	13.1708	13.8921	13.6698	14.8485	NA	NA	NA	NA	13.4259	13.3038	14.2186	12.3683	13.512	14.0359	NA	NA	11.6925	13.6433	NA	13.9578
AAIEDAAINK	Lactobacillus reuteri	Species	Bacteria		Firmicutes	Bacilli	Lactobacillales	Lactobacillaceae	Lactobacillus	Lactobacillus reuteri	NA	15.8465	NA	NA	NA	NA	NA	15.3021	NA	NA	14.9818	NA	14.1006	NA	NA	NA	NA	NA	NA	NA	15.5094	14.1896	14.1792	NA
AAIEEGIVPGGGVAYIR	Bacteria	Superkingdom	Bacteria								13.0015	14.4493	14.4446	13.5044	11.5123	13.6005	11.47	12.185	12.358	12.6519	13.9013	12.4834	12.9085	11.6104	14.2183	12.2601	12.5101	12.7553	13.6021	14.7803	NA	NA	12.6104	15.0076
AAIEFVR	Actinobacteria	Class	Bacteria		Actinobacteria	Actinobacteria					12.3711	NA	10.6934	12.9364	12.8635	13.4927	13.8549	13.0057	13.1694	11.6796	NA	NA	NA	12.9742	13.195	12.4433	12.373	NA	12.5708	12.8473	NA	12.6081	12.6114	14.1158
AAIEMEGPVYLR	Ruminococcus	Genus	Bacteria		Firmicutes	Clostridia	Clostridiales	Ruminococcaceae	Ruminococcus		NA	12.5589	NA	11.4442	13.5082	NA	NA	NA	NA	NA	13.4782	NA	NA	13.4482	15.213	13.9344	NA	13.3621	14.0036	13.348	NA	12.5439	12.6141	14.9077
AAIGDTLVQDIR	Rodentia	Order	Eukaryota	Metazoa	Chordata	Mammalia	Rodentia				12.8077	14.0163	13.2091	14.2461	NA	12.6415	NA	NA	12.655	12.1106	12.6956	12.3982	12.9028	12.7467	12.5919	12.7847	12.5945	13.4096	13.1148	13.3149	12.7728	12.7458	12.7932	13.0109
AAIGYDDADTIAK	Lachnospiraceae bacterium MD335	Species	Bacteria		Firmicutes	Clostridia	Clostridiales	Lachnospiraceae		Lachnospiraceae bacterium MD335	NA	NA	NA	NA	13.0335	NA	NA	NA	11.6355	NA	12.6721	11.4117	13.503	NA	12.9725	NA	NA	NA	NA	12.6354	NA	NA	13.3443	NA
AAIISAEGDSK	Metazoa	Kingdom	Eukaryota	Metazoa							13.4064	14.3082	14.4542	14.0185	NA	15.364	NA	NA	NA	NA	NA	NA	NA	NA	NA	NA	NA	NA	14.3608	NA	NA	NA	NA	NA
AAINNGYDMDIK	Clostridiales	Order	Bacteria		Firmicutes	Clostridia	Clostridiales				14.9102	13.2335	14.1826	14.0552	15.809	16.138	16.1423	16.253	14.9359	15.0572	14.8164	14.2448	15.772	15.9825	15.1086	16.9247	15.2012	15.9181	15.2501	15.2961	16.5807	16.4988	16.0589	16.6316
AAINSVSSTR	Anaerotignum neopropionicum	Species	Bacteria		Firmicutes	Clostridia	Clostridiales	Lachnospiraceae	Anaerotignum	Anaerotignum neopropionicum	16.6405	NA	16.3174	NA	15.3205	NA	13.4203	NA	NA	15.4305	16.277	NA	NA	15.3282	NA	NA	14.7429	14.712	15.1392	14.084	NA	12.0526	NA	NA
AAINYVSDVR	Flavonifractor plautii	Species	Bacteria		Firmicutes	Clostridia	Clostridiales	Ruminococcaceae	Flavonifractor	Flavonifractor plautii	NA	NA	NA	14.8489	NA	NA	NA	NA	14.3996	NA	NA	12.9629	NA	NA	NA	NA	NA	NA	NA	NA	NA	NA	13.6626	14.0003
AAINYVSTTR	Lachnospiraceae bacterium MD308	Species	Bacteria		Firmicutes	Clostridia	Clostridiales	Lachnospiraceae		Lachnospiraceae bacterium MD308	15.7755	15.577	17.2691	18.599	15.3805	NA	15.0016	NA	16.3235	16.1089	11.4756	NA	17.4556	15.2797	17.003	18.2626	17.8609	14.8814	15.4904	12.8167	15.6427	16.9146	17.5632	11.9273
AAISAIDR	Lactobacillus	Genus	Bacteria		Firmicutes	Bacilli	Lactobacillales	Lactobacillaceae	Lactobacillus		NA	12.9773	NA	NA	NA	NA	NA	13.7936	NA	NA	NA	NA	NA	NA	NA	NA	NA	NA	NA	NA	NA	NA	NA	NA
AAISDSVVEPAAK	Muridae	Family	Eukaryota	Metazoa	Chordata	Mammalia	Rodentia	Muridae			13.9934	14.1372	15.3758	16.8334	14.1017	14.9712	10.7261	13.5025	13.6911	NA	13.9908	13.2221	15.8992	14.128	14.7265	13.6204	13.3461	13.2543	15.0553	13.544	11.6085	NA	15.2278	15.3678
AAISQPGISEDLEK	Mus musculus	Species	Eukaryota	Metazoa	Chordata	Mammalia	Rodentia	Muridae	Mus	Mus musculus	NA	11.9282	11.8656	NA	NA	NA	NA	NA	NA	NA	NA	NA	NA	NA	NA	NA	NA	NA	NA	NA	NA	NA	NA	NA
AAIVEVNSETDFVAK	Clostridiales	Order	Bacteria		Firmicutes	Clostridia	Clostridiales				NA	NA	NA	NA	11.7223	13.4864	NA	11.5367	NA	NA	NA	NA	12.1929	11.9426	11.6587	NA	11.5101	NA	12.1664	NA	NA	11.032	11.3695	13.7532
AAIYGHDANFGR	Lachnospiraceae bacterium A4	Species	Bacteria		Firmicutes	Clostridia	Clostridiales	Lachnospiraceae		Lachnospiraceae bacterium A4	10.6497	NA	NA	NA	12.421	12.0225	12.8719	11.1632	NA	NA	NA	NA	11.8563	12.5354	12.7419	11.5436	10.6987	12.1265	NA	NA	9.75705	11.531	11.9603	NA
AAKPIGSALPASPGAACGK	Anaerotruncus sp. G3(2012)	Species	Bacteria		Firmicutes	Clostridia	Clostridiales	Ruminococcaceae	Anaerotruncus	Anaerotruncus sp. G3(2012)	NA	NA	NA	9.72218	10.0057	NA	9.63246	NA	9.23126	NA	NA	NA	NA	NA	NA	9.15476	9.34678	NA	NA	9.51648	8.9093	9.80204	10.0101	11.4899
AALAAAIQK	Lachnospiraceae bacterium A2	Species	Bacteria		Firmicutes	Clostridia	Clostridiales	Lachnospiraceae		Lachnospiraceae bacterium A2	NA	NA	NA	NA	NA	NA	NA	NA	NA	NA	NA	NA	NA	NA	NA	12.6978	NA	NA	NA	NA	12.6249	NA	NA	NA
AALADSGLDNK	Alistipes putredinis	Species	Bacteria		Bacteroidetes	Bacteroidia	Bacteroidales	Rikenellaceae	Alistipes	Alistipes putredinis	12.9654	NA	NA	NA	13.1372	NA	NA	NA	NA	NA	14.6369	NA	NA	13.1004	NA	NA	NA	NA	14.9773	NA	NA	NA	NA	13.7882
AALAHSEIATTQAASTK	Mus musculus	Species	Eukaryota	Metazoa	Chordata	Mammalia	Rodentia	Muridae	Mus	Mus musculus	NA	11.739	10.9411	NA	NA	NA	NA	NA	NA	NA	NA	NA	NA	NA	NA	NA	NA	NA	NA	NA	NA	NA	NA	NA
AALATSSFLSAASFQETTK	Lachnospiraceae	Family	Bacteria		Firmicutes	Clostridia	Clostridiales	Lachnospiraceae			NA	NA	NA	NA	10.2915	NA	10.3352	NA	NA	NA	NA	NA	NA	10.462	10.0126	NA	8.5556	NA	9.29301	NA	NA	NA	NA	NA
AALDEQFEPQK	Mammalia	Class	Eukaryota	Metazoa	Chordata	Mammalia					NA	NA	NA	11.7603	NA	NA	NA	NA	NA	NA	NA	NA	NA	NA	NA	NA	NA	NA	NA	NA	NA	NA	NA	NA
AALDGLTAEQVSK	Lactobacillus	Genus	Bacteria		Firmicutes	Bacilli	Lactobacillales	Lactobacillaceae	Lactobacillus		15.4187	16.6573	14.3793	14.9148	12.8473	11.5363	13.4598	15.8298	10.7052	11.5019	15.5651	15.0484	14.4954	13.2734	14.7221	14.4482	14.5551	13.5354	15.1602	15.379	15.4328	14.236	14.1736	13.839
AALDGTPGMIGYGMAK	Mammalia	Class	Eukaryota	Metazoa	Chordata	Mammalia					NA	11.9285	NA	NA	NA	11.9418	NA	NA	NA	NA	10.2608	NA	NA	NA	NA	NA	NA	NA	11.4756	NA	NA	NA	NA	11.2021
AALDGTVFR	Bacteria	Superkingdom	Bacteria								13.4988	NA	12.4027	13.0467	15.3612	14.0785	13.8185	NA	13.9739	NA	14.2941	14.2516	NA	15.3421	14.9616	14.2048	14.0706	13.6682	14.6218	14.6666	NA	13.5947	NA	NA
AALDSALDAAGIK	Lachnospiraceae bacterium A4	Species	Bacteria		Firmicutes	Clostridia	Clostridiales	Lachnospiraceae		Lachnospiraceae bacterium A4	16.1231	NA	14.1114	13.0485	15.1365	NA	15.6396	15.4227	NA	NA	16.0684	18.3734	NA	14.8194	13.0316	14.2508	15.7615	13.8741	15.4354	16.359	NA	16.6778	13.8003	NA
AALEAGVDK	Clostridiales	Order	Bacteria		Firmicutes	Clostridia	Clostridiales				14.4656	14.9348	14.9306	15.1065	16.0638	16.3594	16.1392	15.2744	16.2391	13.9289	14.6974	NA	NA	16.1792	16.8274	15.6081	15.1414	15.3413	16.2106	14.8181	16.9692	15.0995	NA	17.3493
AALEAGVDKLADTVCVTLGPK	Eubacterium plexicaudatum	Species	Bacteria		Firmicutes	Clostridia	Clostridiales	Eubacteriaceae	Eubacterium	Eubacterium plexicaudatum	NA	NA	NA	NA	10.8291	NA	NA	NA	NA	NA	NA	NA	NA	11.0526	10.8277	NA	9.75591	NA	10.7331	NA	NA	NA	11.2088	13.0977
AALEFAVAASALK	Clostridiales	Order	Bacteria		Firmicutes	Clostridia	Clostridiales				NA	NA	NA	NA	NA	11.9118	NA	NA	NA	NA	NA	NA	NA	10.9191	11.2974	NA	NA	NA	NA	NA	NA	NA	NA	NA
AALEGTLAETEAR	Mammalia	Class	Eukaryota	Metazoa	Chordata	Mammalia					16.0429	18.376	18.0002	18.5176	13.1383	16.6792	11.9823	13.8523	14.5596	12.718	14.8366	14.2292	14.7661	13.0903	15.1519	NA	14.6524	14.7861	16.6437	14.9235	NA	12.2094	16.3725	15.7936
AALENDFAENDAMQYAAVR	Lachnospiraceae bacterium M18-1	Species	Bacteria		Firmicutes	Clostridia	Clostridiales	Lachnospiraceae		Lachnospiraceae bacterium M18-1	NA	NA	NA	8.79097	10.5821	NA	10.9088	10.1017	NA	NA	NA	NA	10.741	10.6786	11.8313	NA	9.75665	NA	NA	NA	NA	9.52406	NA	10.4952
AALESGVDQLADTVR	Lachnospiraceae bacterium 3_1_57FAA_CT1	Species	Bacteria		Firmicutes	Clostridia	Clostridiales	Lachnospiraceae		Lachnospiraceae bacterium 3_1_57FAA_CT1	NA	NA	NA	NA	NA	NA	NA	NA	NA	NA	NA	NA	11.1309	NA	NA	NA	NA	NA	NA	NA	11.3059	NA	NA	11.6263
AALESGVNQLADTVR	Lachnospiraceae	Family	Bacteria		Firmicutes	Clostridia	Clostridiales	Lachnospiraceae			14.1295	14.174	14.0269	15.5992	16.7879	16.4448	15.7738	15.0807	15.6816	14.1329	15.0953	15.1419	17.2362	16.7002	17.2989	16.0428	15.4449	14.4635	17.0456	15.9521	16.2035	14.8169	16.4684	16.6444
AALESGVNQLANTVR	Lachnospiraceae bacterium 2_1_46FAA	Species	Bacteria		Firmicutes	Clostridia	Clostridiales	Lachnospiraceae		Lachnospiraceae bacterium 2_1_46FAA	NA	NA	11.9156	NA	14.3371	14.6839	15.2421	15.4101	14.8975	13.1021	NA	14.7075	14.572	14.0884	14.5824	14.7479	14.469	14.9163	14.096	NA	14.616	14.7819	14.5384	14.47
AALETGVNK	Clostridiales	Order	Bacteria		Firmicutes	Clostridia	Clostridiales				NA	NA	15.0184	NA	NA	14.2888	NA	NA	NA	14.0255	14.3081	NA	NA	13.6633	15.0008	NA	15.1766	14.2059	15.0907	NA	NA	NA	NA	NA
AALEYAVAASALK	Clostridiales	Order	Bacteria		Firmicutes	Clostridia	Clostridiales				NA	NA	9.79578	11.4503	13.8584	13.8372	13.4259	13.2503	12.933	NA	12.5936	11.1859	14.4965	13.7487	14.4094	11.8807	13.058	13.9367	14.3043	12.6103	13.3269	12.5325	13.5962	13.6618
AALEYGVAASALK	Lachnospiraceae bacterium MD335	Species	Bacteria		Firmicutes	Clostridia	Clostridiales	Lachnospiraceae		Lachnospiraceae bacterium MD335	14.1701	12.5003	14.156	12.6129	15.864	13.8262	15.1377	13.9736	15.253	14.7016	14.5252	14.8519	14.7067	15.7505	15.3444	16.0226	15.5573	14.3013	15.0473	14.6749	14.8231	15.123	15.363	14.1871
AALIFGNVTPGDAANLMK	Blautia	Genus	Bacteria		Firmicutes	Clostridia	Clostridiales	Lachnospiraceae	Blautia		12.3837	11.2047	10.2951	11.6666	14.0331	12.2388	15.462	12.9317	12.5935	NA	13.056	11.9471	14.5692	13.8004	14.6242	14.0941	13.3335	13.5179	13.9254	13.5795	12.5455	10.9287	13.2981	13.3567
AALKEELAK	Sclerotinia borealis	Species	Eukaryota	Fungi	Ascomycota	Leotiomycetes	Helotiales	Sclerotiniaceae	Sclerotinia	Sclerotinia borealis	NA	NA	NA	NA	12.341	13.2225	12.4875	NA	11.9124	10.5752	NA	NA	12.1501	12.1879	12.222	12.8982	NA	NA	10.9233	NA	11.6847	NA	12.664	13.4375
AALLITDIEMPEMDGHR	Dorea	Genus	Bacteria		Firmicutes	Clostridia	Clostridiales	Lachnospiraceae	Dorea		NA	10.116	NA	10.7248	11.9637	12.3035	12.8893	12.4263	NA	NA	NA	NA	12.1203	12.1238	13.0531	10.9286	12.6346	11.358	11.4221	NA	10.4186	10.3722	NA	12.4739
AALNLLECGVSR	Mus musculus	Species	Eukaryota	Metazoa	Chordata	Mammalia	Rodentia	Muridae	Mus	Mus musculus	18.1184	19.1222	19.0383	19.175	17.8436	17.6418	16.924	17.467	18.0204	17.6011	17.2235	17.2922	16.8034	17.4778	15.0545	16.9703	18.9169	16.8498	17.3782	16.6309	17.5861	18.0505	18.0894	16.8234
AALNLMGK	Clostridiales	Order	Bacteria		Firmicutes	Clostridia	Clostridiales				NA	NA	11.3658	11.9904	13.3366	13.2221	NA	NA	12.6209	11.9366	NA	11.9607	NA	13.4121	13.146	NA	12.8304	12.4337	13.0435	12.6824	NA	11.1918	NA	NA
AALNQQILK	Mammalia	Class	Eukaryota	Metazoa	Chordata	Mammalia					NA	NA	NA	12.4068	NA	NA	NA	NA	NA	NA	NA	NA	NA	NA	NA	NA	NA	NA	NA	NA	NA	NA	NA	NA
AALNVQAR	Oscillibacter sp. 1-3	Species	Bacteria		Firmicutes	Clostridia	Clostridiales	Oscillospiraceae	Oscillibacter	Oscillibacter sp. 1-3	NA	NA	NA	NA	13.4493	NA	NA	NA	13.6128	NA	NA	NA	NA	13.6631	14.6351	NA	NA	NA	13.5671	NA	13.0061	NA	NA	14.417
AALQELLSK	Metazoa	Kingdom	Eukaryota	Metazoa							13.602	15.4362	NA	15.3173	NA	14.7049	NA	13.6562	14.86	NA	13.8431	13.3416	13.6628	13.3272	13.487	NA	NA	14.4784	13.5609	13.3724	13.546	NA	13.6659	13.7937
AALTADDIAK	Clostridiales	Order	Bacteria		Firmicutes	Clostridia	Clostridiales				12.9641	12.6792	NA	12.5365	14.3851	NA	14.5449	13.6218	14.4896	NA	13.9859	NA	14.7171	14.554	14.4858	NA	12.7853	12.9017	15.9034	13.4834	NA	NA	14.6403	14.948
AALTFLQDENMVSFIK	Chordata	Phylum	Eukaryota	Metazoa	Chordata						NA	NA	NA	NA	NA	9.63033	NA	NA	NA	NA	NA	NA	NA	NA	NA	NA	NA	NA	NA	NA	NA	NA	NA	NA
AALVGNYEGTASR	Firmicutes	Phylum	Bacteria		Firmicutes						NA	NA	13.8982	NA	13.3605	14.0983	15.1356	11.9373	13.8866	12.8697	NA	NA	14.2313	NA	NA	NA	NA	NA	NA	NA	NA	NA	NA	NA
AALVHGLK	Clostridiales	Order	Bacteria		Firmicutes	Clostridia	Clostridiales				NA	NA	NA	NA	NA	NA	NA	15.154	12.3643	NA	NA	14.8366	13.4995	NA	NA	NA	NA	NA	NA	NA	13.0664	NA	12.0925	NA
AALVVLPSDK	Lachnospiraceae bacterium A4	Species	Bacteria		Firmicutes	Clostridia	Clostridiales	Lachnospiraceae		Lachnospiraceae bacterium A4	NA	NA	NA	NA	NA	14.4943	14.0471	13.6995	NA	13.8273	NA	NA	NA	14.7257	NA	NA	13.2425	13.8471	NA	13.0455	NA	13.9567	NA	NA
AALWAATR	Bacteria	Superkingdom	Bacteria								NA	NA	NA	NA	13.6402	13.4833	13.7204	NA	14.0706	13.0067	13.2241	12.8673	13.9126	13.6151	13.1711	NA	14.2128	13.9619	14.0579	NA	12.7547	NA	NA	NA
AAMDWFQR	Eggerthellaceae	Family	Bacteria		Actinobacteria	Coriobacteriia	Eggerthellales	Eggerthellaceae			14.1354	13.7536	NA	14.0244	13.9077	12.5917	13.136	14.4288	13.2609	12.1994	NA	14.7572	13.434	13.2482	NA	13.8932	NA	NA	14.2509	NA	14.1733	13.5024	12.7882	12.3376
AAMELPQDAIVNLGTGAPEK	Clostridiales	Order	Bacteria		Firmicutes	Clostridia	Clostridiales				10.4951	NA	NA	NA	10.4079	9.98963	10.7264	10.039	10.8322	8.76809	10.5383	11.0246	11.4702	11.0207	11.1191	9.6333	10.5873	11.6149	10.694	9.61272	9.86334	NA	11.0326	NA
AAMEYGLK	Clostridiales	Order	Bacteria		Firmicutes	Clostridia	Clostridiales				14.148	NA	NA	NA	NA	14.8873	NA	14.1428	NA	12.8399	NA	NA	14.1236	13.6586	14.5667	NA	NA	NA	NA	NA	NA	NA	NA	14.5051
AAMGLGAQGLILSR	Muridae	Family	Eukaryota	Metazoa	Chordata	Mammalia	Rodentia	Muridae			NA	NA	NA	NA	NA	11.5926	NA	NA	NA	NA	NA	NA	NA	NA	NA	NA	NA	NA	NA	NA	NA	NA	NA	NA
AAMIGHDFMEITTPILTCSSPEGAR	Lachnospiraceae bacterium A4	Species	Bacteria		Firmicutes	Clostridia	Clostridiales	Lachnospiraceae		Lachnospiraceae bacterium A4	NA	NA	NA	NA	9.96665	9.48197	NA	NA	NA	NA	NA	NA	10.1752	11.0519	9.82155	NA	NA	NA	NA	NA	NA	NA	9.45713	NA
AAMIVNQLSK	Chordata	Phylum	Eukaryota	Metazoa	Chordata						NA	13.174	NA	NA	NA	13.4679	NA	NA	NA	NA	12.4608	NA	NA	NA	NA	NA	13.4737	NA	NA	NA	NA	NA	NA	13.0194
AAMLAIMNPDDK	Clostridiales	Order	Bacteria		Firmicutes	Clostridia	Clostridiales				13.3124	12.7552	12.7645	12.8603	15.3616	15.1688	NA	14.1009	14.6924	14.2255	13.795	NA	15.1922	15.2319	14.8852	14.2146	14.9685	15.0812	14.9969	NA	14.1905	14.662	15.2744	16.4834
AAMLTIMNPDDK	Clostridiales	Order	Bacteria		Firmicutes	Clostridia	Clostridiales				15.7886	12.7754	15.2677	13.2201	17.0108	NA	16.1016	14.5178	14.9625	13.3393	15.4337	15.4404	15.8403	16.8716	16.3756	15.2718	15.1163	14.6492	15.7558	16.1799	15.7656	14.8735	15.7547	NA
AAMMTIMNPDDK	Shuttleworthia	Genus	Bacteria		Firmicutes	Clostridia	Clostridiales	Lachnospiraceae	Shuttleworthia		NA	11.6864	11.515	10.5641	12.7449	12.5856	11.6754	11.8007	11.6676	11.6343	11.5001	10.667	14.0878	12.8069	12.0571	11.7941	12.2101	12.176	13.2465	12.3204	11.0559	10.2003	13.7036	NA
AAMNLMGWDVGSLR	Lachnospiraceae bacterium A2	Species	Bacteria		Firmicutes	Clostridia	Clostridiales	Lachnospiraceae		Lachnospiraceae bacterium A2	NA	NA	NA	NA	12.2967	12.2011	13.3649	12.1297	NA	NA	NA	NA	NA	12.455	11.3315	NA	NA	NA	NA	NA	12.445	NA	NA	NA
AAMPEANPVLLEPVGELK	Clostridiales	Order	Bacteria		Firmicutes	Clostridia	Clostridiales				NA	NA	NA	10.6851	11.767	12.5385	NA	NA	NA	NA	NA	NA	11.9834	11.9834	12.3678	NA	NA	NA	13.7421	NA	NA	NA	10.6294	14.0088
AAMTVSISDMTVPAEK	Clostridiales	Order	Bacteria		Firmicutes	Clostridia	Clostridiales				11.0378	NA	NA	NA	11.227	NA	11.6158	NA	NA	NA	10.5913	11.7005	NA	11.5963	12.6501	10.131	NA	NA	11.4981	12.0753	NA	NA	11.2735	NA
AANAGGVATSALEMTQNSER	Clostridiales	Order	Bacteria		Firmicutes	Clostridia	Clostridiales				11.7283	12.1306	11.9127	12.4341	12.9225	14.4346	10.9467	13.5974	11.7605	11.9378	13.1613	10.9523	10.9133	12.6423	13.0855	12.9522	12.3218	12.064	13.4631	11.9894	12.0292	12.374	12.964	14.7887
AANAGGVATSGLEMSQNSER	Bacteria	Superkingdom	Bacteria								9.5643	8.14588	NA	8.89872	11.1813	10.4968	10.4397	9.77252	NA	NA	NA	9.46023	11.5885	11.2008	9.67757	9.16425	8.66591	NA	9.74187	9.12942	NA	NA	9.64892	12.0399
AANAGGVSVSGLEMAQNSQK	Prevotella	Genus	Bacteria		Bacteroidetes	Bacteroidia	Bacteroidales	Prevotellaceae	Prevotella		12.0175	12.0817	12.6206	11.9349	11.1031	8.63925	NA	10.1575	10.5146	NA	11.7902	NA	11.5133	10.9503	11.3236	8.29288	9.82091	NA	11.4635	8.88196	9.92999	NA	10.9135	11.1612
AANEAGYFNEEMAPIEVK	Muridae	Family	Eukaryota	Metazoa	Chordata	Mammalia	Rodentia	Muridae			9.47648	11.6187	10.8062	11.0879	NA	11.6208	NA	10.0796	9.23986	NA	9.82982	10.1074	10.3779	NA	9.73051	NA	NA	10.1142	11.5059	10.2873	NA	NA	10.9643	10.9442
AANEANPIPESDEPFFNYISGER	Lachnospiraceae bacterium A4	Species	Bacteria		Firmicutes	Clostridia	Clostridiales	Lachnospiraceae		Lachnospiraceae bacterium A4	NA	NA	12.3654	10.7408	12.0863	12.8203	10.7604	11.7733	NA	NA	NA	NA	NA	12.5913	NA	NA	NA	NA	NA	11.0335	NA	NA	NA	NA
AANGVILVTTK	Bacteria	Superkingdom	Bacteria								11.5268	11.6821	11.8983	10.9306	NA	NA	NA	NA	NA	NA	NA	NA	11.7924	NA	NA	NA	NA	NA	11.1493	10.5866	11.084	NA	NA	11.7718
AANGVIVITSK	Bacteroidetes	Phylum	Bacteria		Bacteroidetes						13.8062	13.3739	12.8782	NA	NA	11.1515	NA	NA	12.3899	NA	13.5557	NA	NA	NA	NA	NA	12.2023	NA	11.73	12.3858	11.7081	NA	NA	11.7298
AANGVVILTSK	Bacteroides intestinalis	Species	Bacteria		Bacteroidetes	Bacteroidia	Bacteroidales	Bacteroidaceae	Bacteroides	Bacteroides intestinalis	NA	NA	13.1396	NA	NA	12.6275	NA	NA	NA	12.8621	NA	NA	NA	NA	NA	NA	NA	NA	NA	NA	NA	NA	NA	NA
AANGVVLATEK	Eukaryota	Superkingdom	Eukaryota								NA	12.6733	NA	13.7224	NA	NA	NA	12.4469	NA	NA	NA	NA	12.6972	NA	NA	11.998	NA	11.6686	11.9343	NA	NA	11.4633	12.4078	12.3449
AANGVVLATEKK	Eukaryota	Superkingdom	Eukaryota								8.75749	10.195	NA	10.029	NA	10.195	NA	NA	NA	NA	NA	NA	NA	NA	NA	NA	NA	NA	NA	NA	NA	NA	10.4832	NA
AANGVVMVTTK	Bacteroidetes	Phylum	Bacteria		Bacteroidetes						10.7526	12.1968	NA	12.352	NA	NA	NA	NA	NA	12.5019	11.1453	NA	NA	NA	NA	NA	NA	NA	NA	11.3171	11.3372	11.0925	NA	NA
AANGVVVITTK	Bacteria	Superkingdom	Bacteria								11.3229	10.6851	10.9877	NA	NA	NA	NA	NA	NA	9.38879	NA	10.1221	NA	NA	NA	NA	NA	NA	NA	NA	9.96916	NA	NA	NA
AANIVEAVK	Oscillibacter sp. 1-3	Species	Bacteria		Firmicutes	Clostridia	Clostridiales	Oscillospiraceae	Oscillibacter	Oscillibacter sp. 1-3	12.6804	10.6527	11.738	11.0857	NA	12.3015	13.3699	12.4754	13.6959	13.4108	13.1372	13.8099	13.7577	NA	14.4632	13.2755	14.1028	14.8876	13.4486	12.6995	12.5408	11.2649	13.577	NA
AANIVEAVKK	Oscillibacter sp. 1-3	Species	Bacteria		Firmicutes	Clostridia	Clostridiales	Oscillospiraceae	Oscillibacter	Oscillibacter sp. 1-3	NA	NA	NA	NA	NA	12.2925	NA	12.2137	12.9616	NA	NA	13.7137	13.9835	NA	NA	NA	NA	NA	NA	NA	11.6456	NA	14.1921	NA
AANLDAIHDTVHEMAK	Clostridiales	Order	Bacteria		Firmicutes	Clostridia	Clostridiales				NA	NA	NA	NA	NA	NA	NA	13.3633	NA	NA	NA	NA	NA	NA	NA	NA	NA	NA	NA	NA	NA	NA	NA	NA
AANLDAIHDTVHEMAR	Bacteria	Superkingdom	Bacteria								NA	NA	NA	NA	NA	NA	NA	17.4045	NA	NA	NA	NA	NA	NA	NA	NA	NA	NA	NA	NA	NA	NA	NA	NA
AANNGALPPDLSYIVR	Eukaryota	Superkingdom	Eukaryota								NA	NA	NA	NA	NA	NA	NA	NA	NA	NA	NA	NA	11.1796	NA	12.4852	NA	NA	12.8745	11.7106	NA	NA	NA	NA	12.8071
AANPDIIFAPSSITTAPLIIK	Clostridiales	Order	Bacteria		Firmicutes	Clostridia	Clostridiales				NA	NA	NA	NA	9.19882	NA	NA	7.99989	8.65061	NA	NA	10.5094	9.4314	8.29188	9.31529	NA	9.48555	NA	9.76699	9.8594	9.23711	NA	8.92234	9.41808
AANQAFGK	Lactobacillaceae	Family	Bacteria		Firmicutes	Bacilli	Lactobacillales	Lactobacillaceae			NA	NA	NA	NA	NA	NA	NA	NA	NA	NA	NA	NA	NA	NA	12.1707	NA	NA	NA	NA	NA	NA	NA	NA	NA
AANVLLSEQGDVK	Metazoa	Kingdom	Eukaryota	Metazoa							NA	12.1839	NA	13.2966	12.2472	12.6314	NA	11.8755	11.5862	NA	NA	11.3519	12.7045	11.8733	NA	NA	NA	11.9678	11.9691	NA	NA	NA	12.8257	13.1487
AANVTDCSDASQR	Mucispirillum schaedleri	Species	Bacteria		Deferribacteres	Deferribacteres	Deferribacterales	Deferribacteraceae	Mucispirillum	Mucispirillum schaedleri	NA	12.5531	13.0187	11.6665	NA	12.2088	15.3044	12.3435	10.9646	9.96685	NA	12.8713	NA	NA	10.8101	12.5742	NA	NA	12.9945	NA	9.89321	12.938	NA	NA
AANVTLVGTEK	Firmicutes	Phylum	Bacteria		Firmicutes						13.2281	13.842	14.3988	14.4182	15.6473	15.0883	14.99	14.706	15.7632	14.3733	14.6079	14.6173	15.3102	15.56	14.2578	15.7648	15.7828	15.1302	15.0416	14.6639	14.8021	14.6139	15.6608	12.4692
AANYLSAGQLYLLDNPLLK	Bacteria	Superkingdom	Bacteria								NA	NA	NA	NA	8.20727	NA	NA	8.34934	NA	NA	NA	NA	10.2189	8.08357	8.05892	NA	NA	NA	NA	NA	9.28607	NA	7.92143	NA
AAPAAAAAMAPPGPR	Mus musculus	Species	Eukaryota	Metazoa	Chordata	Mammalia	Rodentia	Muridae	Mus	Mus musculus	9.26809	10.9443	11.3786	8.9636	NA	11.0782	NA	NA	NA	NA	NA	NA	NA	NA	NA	NA	NA	NA	10.631	NA	NA	NA	NA	10.258
AAPAFEEQSTETELLETGIK	Lachnospiraceae bacterium 28-4	Species	Bacteria		Firmicutes	Clostridia	Clostridiales	Lachnospiraceae		Lachnospiraceae bacterium 28-4	NA	NA	NA	NA	NA	NA	NA	NA	NA	NA	NA	NA	NA	NA	9.68496	NA	NA	NA	NA	NA	NA	NA	NA	NA
AAPDITGHK	Chordata	Phylum	Eukaryota	Metazoa	Chordata						13.8273	15.375	15.6731	14.8731	13.4652	14.0427	12.1178	NA	NA	15.0959	13.1564	NA	NA	12.8349	12.8519	12.6227	12.5312	14.2648	13.1025	13.2282	NA	14.2899	NA	12.9181
AAPDITGHKR	Chordata	Phylum	Eukaryota	Metazoa	Chordata						NA	NA	NA	NA	NA	NA	NA	NA	NA	NA	NA	10.088	NA	NA	NA	NA	NA	NA	NA	NA	NA	NA	NA	NA
AAPELSQNKPLEVVDYDVK	Bacteroides	Genus	Bacteria		Bacteroidetes	Bacteroidia	Bacteroidales	Bacteroidaceae	Bacteroides		NA	NA	NA	NA	NA	NA	NA	NA	NA	NA	NA	NA	10.7859	NA	NA	NA	NA	NA	NA	NA	NA	NA	9.85323	NA
AAPFTLEYR	Mammalia	Class	Eukaryota	Metazoa	Chordata	Mammalia					13.4197	16.1496	15.3327	14.6699	11.9409	14.1128	NA	12.4799	13.1089	11.1494	12.2868	12.574	13.1588	12.2948	13.0618	12.0597	12.8156	13.3028	13.5492	12.8147	11.684	NA	13.7924	13.258
AAPGGASPTIFSR	Mus musculus	Species	Eukaryota	Metazoa	Chordata	Mammalia	Rodentia	Muridae	Mus	Mus musculus	NA	NA	NA	NA	NA	12.6077	NA	NA	NA	NA	NA	NA	NA	NA	NA	NA	NA	NA	NA	NA	NA	NA	NA	NA
AAPGLTGFTK	Clostridiales	Order	Bacteria		Firmicutes	Clostridia	Clostridiales				14.2079	12.0302	13.4659	12.1929	13.9289	12.6682	14.616	13.5712	15.1592	14.2852	13.6053	15.7035	14.1127	13.9877	14.8174	13.1151	14.489	15.6539	13.7833	13.5345	13.722	12.773	14.4686	11.0518
AAPTEPPEAPEATAAGGVTSK	Mus musculus	Species	Eukaryota	Metazoa	Chordata	Mammalia	Rodentia	Muridae	Mus	Mus musculus	NA	NA	NA	NA	NA	NA	NA	NA	NA	NA	NA	NA	NA	NA	NA	NA	NA	NA	NA	9.66199	NA	NA	NA	10.176
AAPVLLEPIMK	Bacteria	Superkingdom	Bacteria								15.6646	12.8738	14.1033	13.7155	15.3668	14.3483	15.5824	13.0327	13.9289	11.3066	15.4642	15.0111	15.89	15.4531	16.2164	14.1033	14.1614	13.6538	16.0775	16.2218	12.6516	13.4889	15.2964	14.8779
AAPVTDVK	Fabaceae	Family	Eukaryota	Viridiplantae	Streptophyta	Magnoliopsida	Fabales	Fabaceae			NA	NA	NA	NA	NA	NA	NA	NA	12.4125	NA	NA	NA	NA	NA	NA	NA	NA	NA	NA	NA	NA	NA	NA	NA
AAQEEYIK	Metazoa	Kingdom	Eukaryota	Metazoa							12.8584	13.6071	13.4752	12.6808	NA	14.357	NA	NA	NA	NA	NA	NA	NA	NA	11.9125	NA	NA	NA	NA	NA	NA	NA	NA	12.9767
AAQEEYIKR	Metazoa	Kingdom	Eukaryota	Metazoa							12.5265	14.9256	13.2593	13.6155	NA	14.084	NA	NA	NA	NA	NA	NA	NA	NA	11.5492	NA	NA	NA	12.6224	12.1722	NA	NA	NA	12.9146
AAQFISDHEVEYMK	Lachnospiraceae bacterium A4	Species	Bacteria		Firmicutes	Clostridia	Clostridiales	Lachnospiraceae		Lachnospiraceae bacterium A4	NA	NA	NA	NA	NA	12.9219	13.839	11.8728	13.099	NA	NA	NA	NA	NA	NA	NA	NA	NA	NA	NA	NA	NA	12.3542	NA
AAQFISEHEVENMK	Lachnospiraceae bacterium MD335	Species	Bacteria		Firmicutes	Clostridia	Clostridiales	Lachnospiraceae		Lachnospiraceae bacterium MD335	NA	NA	NA	NA	NA	NA	NA	NA	NA	NA	NA	9.21362	NA	NA	NA	NA	NA	NA	NA	NA	NA	NA	NA	NA
AAQGEPQVQFK	Pipa carvalhoi	Species	Eukaryota	Metazoa	Chordata	Amphibia	Anura	Pipidae	Pipa	Pipa carvalhoi	13.0154	13.9189	13.431	13.1152	NA	13.3009	NA	NA	12.2376	NA	11.6199	11.7075	12.7163	NA	11.5178	9.89054	NA	11.7747	12.4741	11.7106	NA	NA	12.446	12.5535
AAQLCGAGMAAVVDK	Chordata	Phylum	Eukaryota	Metazoa	Chordata						NA	10.6859	NA	NA	NA	11.0427	NA	NA	NA	NA	NA	NA	NA	NA	NA	NA	NA	NA	10.5002	NA	NA	NA	NA	NA
AAQLCGAGMAAVVEK	Chordata	Phylum	Eukaryota	Metazoa	Chordata						10.609	12.4605	11.2121	12.0846	NA	12.2197	NA	NA	NA	10.2551	9.21658	NA	NA	NA	NA	NA	NA	11.063	10.9383	10.8071	NA	NA	NA	11.7665
AAQLGFGGVYVR	Mammalia	Class	Eukaryota	Metazoa	Chordata	Mammalia					NA	10.0806	10.477	NA	NA	NA	NA	NA	NA	NA	NA	NA	NA	NA	NA	NA	NA	NA	10.5623	NA	NA	NA	NA	NA
AAQSPQQHSSGDPTEEESPV	Mus musculus	Species	Eukaryota	Metazoa	Chordata	Mammalia	Rodentia	Muridae	Mus	Mus musculus	NA	9.17396	9.35425	8.44369	NA	9.16846	NA	NA	NA	NA	NA	NA	NA	NA	NA	NA	NA	NA	NA	NA	NA	NA	NA	7.19085
AAQTSDSEKIHLDEK	Mus musculus	Species	Eukaryota	Metazoa	Chordata	Mammalia	Rodentia	Muridae	Mus	Mus musculus	10.0427	11.467	NA	11.2338	NA	11.3504	NA	NA	NA	NA	NA	NA	NA	NA	NA	NA	NA	NA	9.93904	NA	NA	NA	NA	10.4781
AASAEEQATIER	Rodentia	Order	Eukaryota	Metazoa	Chordata	Mammalia	Rodentia				NA	11.3203	NA	11.9893	NA	NA	NA	NA	NA	NA	NA	NA	NA	NA	NA	NA	NA	NA	NA	NA	NA	NA	NA	NA
AASALCAGVR	Muridae	Family	Eukaryota	Metazoa	Chordata	Mammalia	Rodentia	Muridae			20.9129	21.3988	21.7416	21.9504	20.6928	19.7599	19.772	19.8615	20.5702	20.7351	19.8631	20.3779	20.1336	20.6533	18.4415	19.8907	20.276	19.9289	20.3964	20.5383	20.0335	21.0353	20.9408	19.3447
AASATLPPITVTPVVNK	Muridae	Family	Eukaryota	Metazoa	Chordata	Mammalia	Rodentia	Muridae			18.3692	20.3511	19.919	19.4223	18.2717	19.2489	16.1735	17.9039	19.3908	17.1481	18.2128	18.5545	18.1126	17.4277	18.1329	18.1964	18.8298	18.5111	18.517	18.0364	17.4259	17.9322	18.6568	17.9403
AASDYGLK	Clostridiales	Order	Bacteria		Firmicutes	Clostridia	Clostridiales				12.1178	NA	NA	NA	NA	NA	12.5214	NA	NA	NA	NA	NA	NA	11.7363	NA	NA	NA	NA	12.7826	12.318	12.6189	NA	NA	14.377
AASEGELKGVLGYTDEDVVSSDFLGDPR	Oscillibacter	Genus	Bacteria		Firmicutes	Clostridia	Clostridiales	Oscillospiraceae	Oscillibacter		NA	NA	NA	NA	NA	NA	NA	NA	NA	NA	NA	NA	NA	NA	11.2746	NA	NA	NA	NA	NA	NA	NA	NA	NA
AASEKPLSEGGLK	Butyricicoccus pullicaecorum	Species	Bacteria		Firmicutes	Clostridia	Clostridiales	Clostridiaceae	Butyricicoccus	Butyricicoccus pullicaecorum	NA	NA	NA	NA	NA	NA	NA	13.7808	12.2603	NA	NA	12.2856	13.9459	NA	NA	NA	NA	NA	NA	NA	13.0469	NA	14.0822	NA
AASEPLQK	Anaerotruncus	Genus	Bacteria		Firmicutes	Clostridia	Clostridiales	Ruminococcaceae	Anaerotruncus		NA	NA	NA	NA	12.6497	NA	NA	NA	NA	NA	NA	NA	NA	12.65	13.1217	NA	NA	NA	NA	NA	NA	NA	NA	NA
AASFEGVDFLCFR	Marvinbryantia formatexigens	Species	Bacteria		Firmicutes	Clostridia	Clostridiales	Lachnospiraceae	Marvinbryantia	Marvinbryantia formatexigens	NA	10.8053	NA	NA	NA	NA	NA	NA	NA	NA	NA	NA	NA	NA	NA	NA	12.841	NA	NA	NA	NA	10.8753	NA	NA
AASFIYCGLR	Bacteria	Superkingdom	Bacteria								15.1017	11.6201	12.7597	11.8267	15.7781	14.2677	15.9096	13.6196	14.775	13.7957	14.2302	15.4049	14.8093	15.454	11.4692	14.29	14.9178	13.6488	14.1613	15.6144	14.0215	14.8612	14.8416	13.599
AASGFNATEDAQTLR	Mammalia	Class	Eukaryota	Metazoa	Chordata	Mammalia					17.1675	19.2702	18.6594	19.1864	17.113	17.4799	14.009	16.6298	16.5865	15.7435	16.0355	16.3471	18.3808	17.0235	17.274	17.6095	15.8978	15.5798	17.0185	16.2509	15.2048	16.2215	18.0878	16.3798
AASGFNATEDAQTLRK	Mammalia	Class	Eukaryota	Metazoa	Chordata	Mammalia					16.4133	18.9676	15.6446	18.7661	15.8767	16.0858	12.3494	15.2899	15.1809	14.0305	14.4076	15.5837	17.3687	15.8178	16.3186	16.7038	13.8691	13.9337	15.8187	14.8763	14.0305	15.0898	17.5249	14.942
AASGTKEDPNLVPSISNK	Metazoa	Kingdom	Eukaryota	Metazoa							NA	NA	11.3832	12.2072	10.0799	12.8565	NA	10.2701	10.5892	NA	10.1419	11.6712	11.9657	10.4882	NA	10.4132	NA	11.7902	11.4627	10.237	NA	NA	11.6746	13.0084
AASGVILITTK	Bacteroidetes	Phylum	Bacteria		Bacteroidetes						NA	NA	NA	NA	NA	11.6097	NA	NA	NA	NA	NA	NA	NA	NA	NA	NA	10.5429	NA	10.8841	NA	10.5745	NA	NA	NA
AASNCAVTYENVR	Clostridium sp. MD294	Species	Bacteria		Firmicutes	Clostridia	Clostridiales	Clostridiaceae	Clostridium	Clostridium sp. MD294	14.9614	14.017	13.1431	13.8127	15.1527	16.5047	16.3837	14.1807	13.9929	13.5842	14.0963	14.1908	15.0967	15.213	13.329	14.3525	13.8764	14.4574	15.6375	15.4498	15.423	12.4118	16.2253	17.0113
AASNCEVIYENVK	Clostridium	Genus	Bacteria		Firmicutes	Clostridia	Clostridiales	Clostridiaceae	Clostridium		11.3727	11.0992	NA	12.3397	12.7568	12.8675	12.1508	12.085	10.4513	NA	12.1381	10.4137	12.24	12.5653	NA	11.6072	NA	NA	12.3774	11.5489	10.4804	11.7621	13.1729	13.8519
AASNESFGYNTDEIVSSDIVGMR	Clostridiales	Order	Bacteria		Firmicutes	Clostridia	Clostridiales				NA	NA	NA	10.2498	12.9509	14.8763	15.0807	14.3116	11.8738	NA	11.6445	NA	14.0047	13.4363	13.7616	NA	12.8731	NA	12.995	11.9484	11.5982	NA	12.058	NA
AASSASFGYNEDPIVSSDVIGMR	Eubacterium	Genus	Bacteria		Firmicutes	Clostridia	Clostridiales	Eubacteriaceae	Eubacterium		NA	NA	NA	NA	12.2988	NA	12.4569	NA	10.8698	NA	NA	10.3077	12.3623	11.7425	11.4423	9.43375	9.89344	11.3081	9.21568	11.67	11.4013	10.22	11.8781	11.8779
AASSESFGYNEDPIVSSDVIGMR	Ruminococcus bicirculans	Species	Bacteria		Firmicutes	Clostridia	Clostridiales	Ruminococcaceae	Ruminococcus	Ruminococcus bicirculans	NA	NA	NA	NA	NA	NA	NA	NA	NA	NA	NA	NA	11.3947	9.3221	10.2754	NA	NA	NA	NA	NA	NA	NA	10.5508	NA
AASSIYINSR	Mammalia	Class	Eukaryota	Metazoa	Chordata	Mammalia					NA	12.1442	11.9716	11.9357	NA	12.1079	NA	NA	NA	NA	NA	NA	NA	11.0243	NA	NA	NA	NA	NA	NA	NA	NA	NA	NA
AASSLVMDLSQGK	Lachnospiraceae bacterium MD335	Species	Bacteria		Firmicutes	Clostridia	Clostridiales	Lachnospiraceae		Lachnospiraceae bacterium MD335	16.951	NA	17.7135	13.8472	17.4433	16.4997	16.3469	16.5511	16.7877	17.6139	17.2559	17.5379	17.3425	17.4929	16.7816	18.2143	18.3625	16.4375	17.9762	17.3861	17.5745	17.43	17.191	17.0157
AASTQVFVSR	Lactobacillus	Genus	Bacteria		Firmicutes	Bacilli	Lactobacillales	Lactobacillaceae	Lactobacillus		13.8515	14.9052	13.1066	13.0353	11.6202	10.9926	12.2129	14.0393	9.92394	10.4498	14.2588	13.666	13.2811	11.5646	13.2957	12.7842	14.0214	12.0722	13.8239	13.8681	14.4507	13.1779	12.9348	11.9942
AASVAENCINYQQGTPHK	Mammalia	Class	Eukaryota	Metazoa	Chordata	Mammalia					NA	NA	NA	NA	NA	11.0468	NA	NA	11.123	NA	NA	10.8534	10.3198	NA	NA	NA	NA	NA	NA	NA	10.9563	NA	11.3146	10.66
AASVDEINTFAK	Lachnospiraceae bacterium 28-4	Species	Bacteria		Firmicutes	Clostridia	Clostridiales	Lachnospiraceae		Lachnospiraceae bacterium 28-4	13.1618	14.6582	17.3363	12.8115	15.8976	15.1689	NA	14.0324	15.841	13.719	16.4365	13.4329	15.1652	15.7868	15.1542	NA	18.1235	15.8942	17.7886	15.5145	12.6533	17.0525	15.6215	NA
AASVEEPTTGR	Lachnospiraceae bacterium A4	Species	Bacteria		Firmicutes	Clostridia	Clostridiales	Lachnospiraceae		Lachnospiraceae bacterium A4	NA	NA	NA	NA	NA	NA	NA	NA	NA	NA	NA	NA	NA	NA	NA	12.5967	14.7485	NA	NA	NA	NA	NA	NA	NA
AASVEEPTTGRK	Lachnospiraceae bacterium A4	Species	Bacteria		Firmicutes	Clostridia	Clostridiales	Lachnospiraceae		Lachnospiraceae bacterium A4	NA	NA	NA	NA	12.4278	11.9699	13.1564	NA	11.7185	10.4083	NA	NA	NA	11.5023	NA	9.73199	11.1625	10.4514	NA	NA	NA	10.9762	NA	NA
AATAAADFTAK	Metazoa	Kingdom	Eukaryota	Metazoa							14.0204	15.1365	15.2714	15.3662	NA	14.0445	NA	14.0768	14.1893	NA	13.3942	13.9415	12.1284	NA	13.7449	NA	13.9407	14.0622	12.8043	13.8973	13.417	14.2669	14.1983	13.3654
AATALKDVVK	Metazoa	Kingdom	Eukaryota	Metazoa							NA	11.0661	NA	NA	NA	11.2056	NA	NA	NA	NA	NA	NA	NA	NA	NA	NA	NA	11.1985	10.0497	10.5285	NA	NA	NA	11.4488
AATDAGVAVATWDSDAQPSDR	Anaerotruncus sp. G3(2012)	Species	Bacteria		Firmicutes	Clostridia	Clostridiales	Ruminococcaceae	Anaerotruncus	Anaerotruncus sp. G3(2012)	10.972	11.1077	10.9893	12.1297	12.3245	11.23	12.1414	13.538	12.1663	12.4036	9.94526	11.2069	11.6365	12.5348	11.6712	13.0295	11.6178	12.2686	12.0401	10.8611	13.4458	13.796	13.4597	12.924
AATDDKNFSSEFLGGQNPFK	Lachnospiraceae bacterium MD335	Species	Bacteria		Firmicutes	Clostridia	Clostridiales	Lachnospiraceae		Lachnospiraceae bacterium MD335	NA	NA	NA	NA	13.2431	10.9902	NA	NA	NA	NA	NA	NA	13.8198	13.6892	12.9996	NA	13.9939	NA	13.6019	NA	NA	NA	13.0071	12.7765
AATDWYYAFSQNTDYIR	Lachnospiraceae bacterium MD335	Species	Bacteria		Firmicutes	Clostridia	Clostridiales	Lachnospiraceae		Lachnospiraceae bacterium MD335	NA	NA	NA	NA	NA	NA	NA	NA	NA	NA	NA	NA	NA	NA	9.22608	NA	NA	NA	NA	NA	NA	NA	NA	NA
AATIEEDGLVTGIK	Lachnospiraceae bacterium MD335	Species	Bacteria		Firmicutes	Clostridia	Clostridiales	Lachnospiraceae		Lachnospiraceae bacterium MD335	NA	NA	10.2101	NA	NA	NA	NA	NA	NA	NA	NA	10.3013	NA	NA	NA	10.618	11.2335	NA	NA	NA	NA	NA	NA	NA
AATMSAVEAATCR	Mammalia	Class	Eukaryota	Metazoa	Chordata	Mammalia					12.516	14.7375	14.1916	14.5735	NA	13.3655	NA	12.3059	12.8475	12.3191	12.6872	12.2708	13.1731	NA	NA	13.1611	12.9215	13.0623	12.8863	12.4905	NA	12.5855	13.1611	13.4042
AATPVASALAASPGAACGK	Hungateiclostridiaceae bacterium KB18	Species	Bacteria		Firmicutes	Clostridia	Clostridiales	Hungateiclostridiaceae		Hungateiclostridiaceae bacterium KB18	10.8911	11.0698	10.1263	11.3017	12.0881	13.0306	12.3324	11.3936	10.0245	NA	12.0765	NA	12.8181	12.2969	11.4671	10.3144	10.5947	10.7055	13.5884	9.61643	NA	NA	12.1955	14.5907
AATQFWR	Metazoa	Kingdom	Eukaryota	Metazoa							12.0366	12.747	12.9301	12.6588	NA	13.201	NA	NA	NA	12.1452	11.3885	NA	NA	NA	12.1276	NA	12.3662	13.0588	13.0412	11.8979	11.951	11.7256	12.1256	12.3121
AATSLGGGQIEVK	Lachnospiraceae bacterium MD335	Species	Bacteria		Firmicutes	Clostridia	Clostridiales	Lachnospiraceae		Lachnospiraceae bacterium MD335	13.7247	NA	15.3286	10.4556	14.6679	13.3097	13.4176	13.4397	14.6065	15.3776	14.8427	14.4505	14.8549	14.7972	13.7712	15.3014	15.5517	13.5297	14.7864	14.4447	14.5677	14.4632	14.6691	13.5082
AATSPALFNR	Eukaryota	Superkingdom	Eukaryota								NA	13.6115	13.0405	13.309	NA	12.5854	NA	NA	NA	NA	NA	NA	NA	NA	NA	NA	NA	NA	NA	NA	NA	NA	NA	NA
AATVQNTMNPK	Rodentia	Order	Eukaryota	Metazoa	Chordata	Mammalia	Rodentia				NA	13.2666	11.8784	13.4515	NA	12.2487	NA	NA	11.6766	9.27384	10.9804	NA	NA	NA	12.074	NA	NA	NA	12.2163	11.0193	NA	NA	NA	12.9378
AAVAAASMR	Clostridiales	Order	Bacteria		Firmicutes	Clostridia	Clostridiales				NA	NA	NA	NA	NA	NA	NA	NA	NA	NA	NA	NA	NA	13.0323	NA	13.4336	NA	NA	NA	NA	NA	13.3246	NA	NA
AAVAAATMR	Bacteria	Superkingdom	Bacteria								13.9206	15.3112	15.2699	15.6717	16.0054	15.8016	16.0481	NA	NA	15.5575	15.9407	NA	NA	16.0127	14.8507	15.815	16.2116	16.0069	15.7695	15.0994	NA	15.5804	NA	15.0387
AAVANIEEVYA	Clostridiales	Order	Bacteria		Firmicutes	Clostridia	Clostridiales				NA	11.4551	NA	11.1144	12.0065	NA	12.1353	NA	11.625	NA	11.869	NA	NA	11.3348	12.3325	11.4	11.9698	NA	12.9605	12.7092	10.7362	11.4744	NA	12.0065
AAVASLLQSVQVPEFTPK	Metazoa	Kingdom	Eukaryota	Metazoa							10.3534	12.0342	10.832	10.9649	NA	10.0366	NA	NA	NA	NA	NA	NA	NA	NA	NA	NA	NA	NA	NA	NA	NA	NA	NA	NA
AAVAVATMR	Bacteria	Superkingdom	Bacteria								NA	NA	NA	NA	14.6257	14.4953	NA	14.68	15.1113	NA	NA	13.9679	NA	14.6645	14.2034	13.5387	15.1608	NA	NA	NA	NA	NA	14.3758	NA
AAVAVPNRPPDAVLR	Mus musculus	Species	Eukaryota	Metazoa	Chordata	Mammalia	Rodentia	Muridae	Mus	Mus musculus	NA	NA	NA	NA	NA	13.0996	NA	NA	NA	NA	NA	NA	12.3396	11.3123	NA	NA	NA	NA	12.1147	NA	NA	NA	NA	12.8279
AAVDAIDK	Streptomyces decoyicus	Species	Bacteria		Actinobacteria	Actinobacteria	Streptomycetales	Streptomycetaceae	Streptomyces	Streptomyces decoyicus	NA	15.0334	NA	12.6964	14.9666	NA	NA	NA	NA	NA	NA	NA	NA	15.0324	14.3926	13.7149	12.2528	NA	14.3497	NA	NA	14.3228	NA	13.4483
AAVDELHK	Lactobacillales	Order	Bacteria		Firmicutes	Bacilli	Lactobacillales				NA	14.199	12.8628	12.0963	NA	NA	NA	NA	NA	NA	NA	NA	NA	NA	12.5461	NA	12.6568	12.7201	NA	NA	NA	NA	NA	NA
AAVDSGVCVVAK	Bacteria	Superkingdom	Bacteria								14.1626	12.177	12.3505	13.1741	14.0854	13.8815	14.6793	NA	13.314	11.1076	13.4962	12.5273	14.4552	13.9536	NA	13.8159	13.5797	12.8717	14.3868	13.939	12.6817	13.7004	14.4484	14.3332
AAVDYFGK	Odoribacter splanchnicus	Species	Bacteria		Bacteroidetes	Bacteroidia	Bacteroidales	Odoribacteraceae	Odoribacter	Odoribacter splanchnicus	12.0177	13.2918	12.8868	13.3681	12.8052	11.6041	NA	NA	11.0384	NA	12.8783	10.8351	13.4137	12.8905	12.3665	11.2621	11.2063	NA	13.4672	11.4901	NA	NA	NA	NA
AAVEADLNALK	Clostridiales	Order	Bacteria		Firmicutes	Clostridia	Clostridiales				NA	11.0452	13.4118	12.0273	13.8525	NA	13.2602	12.8718	12.2886	NA	NA	12.8098	14.0365	14.2624	14.4438	13.3912	12.7013	NA	13.4118	12.7186	13.2218	11.7076	13.949	NA
AAVEEGIIAGGGSAYIHAAK	Clostridiales	Order	Bacteria		Firmicutes	Clostridia	Clostridiales				NA	NA	NA	NA	13.9838	15.1341	14.1187	13.4767	NA	10.9668	NA	NA	14.1535	14.043	14.0363	11.2733	14.0116	12.8646	14.2292	NA	11.1814	11.3018	12.8228	14.1526
AAVEEGIIAGGGSAYIHASK	Clostridiales	Order	Bacteria		Firmicutes	Clostridia	Clostridiales				NA	NA	NA	NA	NA	NA	NA	13.3901	NA	NA	NA	NA	NA	NA	NA	NA	NA	NA	NA	NA	NA	NA	NA	NA
AAVEEGIISGGGSAYIHASK	Clostridiales	Order	Bacteria		Firmicutes	Clostridia	Clostridiales				NA	NA	NA	NA	NA	NA	NA	NA	NA	NA	NA	NA	11.8079	NA	NA	NA	NA	NA	NA	NA	NA	NA	NA	NA
AAVEEGIVAGGGIAPLNATAAVEK	Anaerotruncus sp. G3(2012)	Species	Bacteria		Firmicutes	Clostridia	Clostridiales	Ruminococcaceae	Anaerotruncus	Anaerotruncus sp. G3(2012)	NA	7.9437	NA	NA	9.5461	NA	NA	10.64	NA	NA	NA	NA	NA	9.46433	10.1657	NA	9.66582	NA	10.3551	NA	NA	NA	10.1887	11.8808
AAVEEGIVAGGGTALINAMPAVEK	Clostridiales	Order	Bacteria		Firmicutes	Clostridia	Clostridiales				NA	NA	NA	NA	NA	11.5717	NA	11.3502	NA	NA	11.2777	NA	NA	NA	NA	NA	NA	9.26687	11.9348	NA	NA	NA	NA	NA
AAVEEGIVLGGGCALLR	Chordata	Phylum	Eukaryota	Metazoa	Chordata						11.4057	13.1478	12.0809	11.6005	NA	13.4855	NA	10.0571	NA	NA	11.0553	NA	NA	NA	10.8438	10.2894	11.8583	12.4808	12.4933	NA	NA	NA	NA	12.8579
AAVEEGIVPGGGTAFIR	Bacteria	Superkingdom	Bacteria								18.1176	NA	15.5354	NA	17.2903	16.615	18.0393	17.649	16.5294	NA	17.1871	NA	17.5416	16.808	17.9382	15.6547	NA	NA	11.7107	NA	17.4837	15.5859	16.2176	11.6621
AAVEEGIVPGGGVALVR	Bacteria	Superkingdom	Bacteria								13.8664	12.4748	12.343	12.9886	14.1776	13.0422	14.5451	13.9565	12.7799	13.8827	13.2337	14.2386	14.4227	14.5099	14.5179	14.2241	13.0597	15.5207	13.9598	13.9424	12.6776	13.5326	13.3419	15.966
AAVEEGIVPGGGVAYIR	Bacteria	Superkingdom	Bacteria								14.5565	15.3623	15.782	16.9609	15.7638	15.698	14.4334	15.317	15.6566	15.2546	16.6635	14.1147	16.7421	15.9472	16.0489	14.9956	15.5836	14.3377	16.7901	14.9888	14.5282	13.809	15.6979	15.6293
AAVEEGYVAGGGTALVDVMK	Lactobacillus	Genus	Bacteria		Firmicutes	Bacilli	Lactobacillales	Lactobacillaceae	Lactobacillus		9.3542	NA	NA	NA	NA	NA	NA	11.3566	NA	NA	12.1197	10.2367	9.48001	9.60817	10.2785	NA	10.1293	9.52423	10.5521	10.2809	10.4921	NA	NA	8.86585
AAVENAVAGK	Butyricicoccus pullicaecorum	Species	Bacteria		Firmicutes	Clostridia	Clostridiales	Clostridiaceae	Butyricicoccus	Butyricicoccus pullicaecorum	13.8431	13.8131	NA	NA	14.0973	14.3388	14.7737	NA	NA	12.0005	12.6227	NA	NA	14.2113	15.7131	13.4976	13.5618	12.6824	14.561	13.8157	NA	13.8046	NA	NA
AAVENLPTFLVELSR	Mammalia	Class	Eukaryota	Metazoa	Chordata	Mammalia					NA	10.494	NA	NA	NA	11.2691	NA	NA	NA	NA	NA	NA	NA	NA	10.8268	NA	NA	NA	NA	NA	NA	NA	NA	NA
AAVETLGVPCFLGGMSR	Rodentia	Order	Eukaryota	Metazoa	Chordata	Mammalia	Rodentia				NA	NA	NA	NA	NA	11.4608	NA	NA	10.6029	NA	NA	NA	11.5328	NA	NA	NA	NA	NA	NA	NA	NA	NA	NA	10.912
AAVIMDYGSTYGSAPYSGGFYR	Lachnospiraceae bacterium A2	Species	Bacteria		Firmicutes	Clostridia	Clostridiales	Lachnospiraceae		Lachnospiraceae bacterium A2	NA	NA	NA	NA	NA	11.3018	12.1769	11.5219	NA	NA	NA	NA	11.9869	NA	NA	NA	NA	12.6228	NA	10.8314	NA	NA	NA	NA
AAVMVHQLSK	Chordata	Phylum	Eukaryota	Metazoa	Chordata						NA	NA	NA	NA	NA	NA	NA	10.6688	NA	NA	NA	NA	12.2593	NA	NA	NA	NA	NA	NA	NA	NA	NA	NA	NA
AAVPDAVGK	Metazoa	Kingdom	Eukaryota	Metazoa							13.83	16.7477	16.6997	15.9664	13.8542	14.6958	NA	13.4447	14.2089	14.2029	13.4902	14.4036	13.4796	13.7174	14.3676	13.832	14.1738	13.7281	13.7586	13.5604	NA	13.444	14.8803	14.114
AAVPSGASTGAFEAVEMR	Clostridiales	Order	Bacteria		Firmicutes	Clostridia	Clostridiales				14.3638	14.4874	13.0906	14.009	15.196	16.9678	16.441	15.6946	15.0749	15.9831	14.0199	14.8785	15.0704	15.3064	15.6931	15.5102	14.7487	15.5336	15.1789	15.0516	17.0151	14.9684	15.5224	17.3827
AAVPSGASTGENEALELR	Bacteria	Superkingdom	Bacteria								16.5047	17.5724	16.8418	17.881	16.6988	17.3226	15.5547	16.8599	16.0302	16.3984	16.5392	15.2804	16.2221	16.621	17.1916	16.4751	17.0588	16.1302	17.3994	15.9659	16.9355	16.2401	16.6041	17.0231
AAVPSGASTGENEALELRDGDK	Bacteria	Superkingdom	Bacteria								NA	12.1091	NA	NA	12.272	12.9196	NA	13.0861	12.2558	11.8975	12.2376	11.8203	12.0255	12.0987	12.2922	11.9479	NA	11.6921	12.5764	11.2407	12.7811	12.4881	12.1116	12.7088
AAVPSGASTGIYEACELRDGDK	Clostridiales	Order	Bacteria		Firmicutes	Clostridia	Clostridiales				NA	NA	NA	11.7599	11.7584	12.7319	12.4127	12.2004	10.6941	NA	11.2799	NA	NA	11.5901	NA	11.4224	NA	NA	11.1503	10.9719	11.357	11.8174	11.7446	12.3518
AAVPSGASTGIYEALELRDNDKTR	Metazoa	Kingdom	Eukaryota	Metazoa							NA	NA	NA	NA	NA	12.8183	NA	NA	NA	NA	NA	NA	NA	NA	NA	NA	NA	NA	NA	NA	NA	NA	NA	NA
AAVPSGASTGVHEACELR	Magnetospirillum	Genus	Bacteria		Proteobacteria	Alphaproteobacteria	Rhodospirillales	Rhodospirillaceae	Magnetospirillum		14.3814	13.9048	13.1768	15.3215	15.0171	15.902	15.9712	NA	14.6466	14.6967	14.6619	13.6168	14.1376	15.3474	12.9964	14.532	15.1097	14.9428	14.0076	14.5986	12.7633	14.7134	15.3842	17.6291
AAVPVINDKPDYK	Clostridiales	Order	Bacteria		Firmicutes	Clostridia	Clostridiales				NA	NA	12.189	12.0905	14.603	14.1293	14.7576	13.1247	14.0659	13.5341	NA	12.8055	14.0654	14.7905	12.7698	13.3771	14.6753	13.9729	14.1237	12.1361	11.9192	13.5871	13.9454	11.3926
AAVPVINDRPDYK	Lachnospiraceae bacterium MD335	Species	Bacteria		Firmicutes	Clostridia	Clostridiales	Lachnospiraceae		Lachnospiraceae bacterium MD335	14.5864	13.2194	12.6494	13.4789	13.393	12.6316	14.5195	13.645	12.8132	NA	15.0154	15.2345	15.0206	13.8374	14.6809	13.9894	NA	13.4906	15.5084	15.8227	14.2179	13.0556	14.0366	14.2186
AAVQEGFVPGGGTALINVIPALDK	Lactobacillus reuteri	Species	Bacteria		Firmicutes	Bacilli	Lactobacillales	Lactobacillaceae	Lactobacillus	Lactobacillus reuteri	NA	10.0213	NA	NA	NA	NA	NA	9.86963	NA	NA	NA	10.898	9.61814	NA	NA	NA	NA	NA	NA	NA	10.2709	NA	NA	NA
AAVQELSGSILTSEDPEER	Muridae	Family	Eukaryota	Metazoa	Chordata	Mammalia	Rodentia	Muridae			NA	9.64347	NA	9.57334	NA	9.92	NA	NA	NA	NA	NA	NA	NA	NA	NA	NA	NA	NA	NA	NA	NA	NA	NA	9.55438
AAVQQLQAEGLSPR	Mammalia	Class	Eukaryota	Metazoa	Chordata	Mammalia					12.1936	12.9425	11.4282	11.8245	NA	12.4619	NA	NA	NA	NA	NA	NA	NA	NA	NA	NA	NA	NA	11.8128	NA	NA	NA	NA	NA
AAVQVLDDIEK	Chordata	Phylum	Eukaryota	Metazoa	Chordata						11.6718	12.3481	NA	11.6914	NA	NA	NA	NA	NA	NA	NA	NA	NA	NA	NA	NA	NA	NA	11.408	NA	NA	NA	NA	NA
AAVSLADTSDYAGNR	Lachnospiraceae bacterium A4	Species	Bacteria		Firmicutes	Clostridia	Clostridiales	Lachnospiraceae		Lachnospiraceae bacterium A4	NA	NA	11.1164	NA	12.8195	NA	NA	NA	13.3675	12.5566	NA	NA	NA	12.9166	NA	NA	14.1832	13.0724	NA	NA	NA	13.9812	NA	NA
AAVSLADTSDYAGNRDFILDYK	Lachnospiraceae bacterium A4	Species	Bacteria		Firmicutes	Clostridia	Clostridiales	Lachnospiraceae		Lachnospiraceae bacterium A4	NA	NA	NA	NA	NA	NA	NA	NA	NA	NA	NA	NA	NA	NA	NA	NA	11.2506	NA	NA	NA	NA	11.2671	NA	NA
AAVVAGIVGTNTSR	Lachnospiraceae bacterium A4	Species	Bacteria		Firmicutes	Clostridia	Clostridiales	Lachnospiraceae		Lachnospiraceae bacterium A4	NA	NA	13.2197	10.8755	12.6735	12.4501	12.9626	NA	NA	13.055	NA	NA	NA	13.0147	NA	NA	13.1627	NA	NA	NA	NA	12.2635	NA	NA
AAVVCVTLLDR	Metazoa	Kingdom	Eukaryota	Metazoa							NA	NA	NA	NA	NA	NA	NA	NA	11.2959	NA	NA	NA	NA	NA	NA	NA	NA	NA	NA	NA	NA	NA	12.5786	NA
AAVVEVNSETDFVAK	Clostridiales	Order	Bacteria		Firmicutes	Clostridia	Clostridiales				NA	NA	NA	NA	NA	NA	NA	NA	NA	NA	NA	NA	NA	NA	NA	NA	10.1135	NA	NA	NA	NA	NA	NA	NA
AAVVTGMELK	Mammalia	Class	Eukaryota	Metazoa	Chordata	Mammalia					NA	14.1095	12.7274	12.4351	NA	13.1794	NA	NA	NA	NA	NA	NA	NA	NA	NA	NA	11.0193	NA	12.9551	12.2945	NA	NA	12.3359	12.7714
AAVWTDSR	Chordata	Phylum	Eukaryota	Metazoa	Chordata						16.8755	17.9876	17.9733	17.7586	16.7703	15.8297	15.9382	17.6725	17.4224	17.8441	16.6644	16.7059	16.028	16.8251	16.5295	16.5637	17.1449	16.9838	16.7172	16.7815	16.3949	17.2344	16.266	16.3912
AAWEEAEHAAK	Bacteria	Superkingdom	Bacteria								18.192	17.6018	14.3783	17.5608	18.7163	17.9707	18.8678	NA	NA	NA	NA	NA	NA	18.7638	18.0572	17.8574	18.0956	NA	NA	NA	17.3822	18.3411	NA	NA
AAWEEAEHACK	Clostridium sp. MD294	Species	Bacteria		Firmicutes	Clostridia	Clostridiales	Clostridiaceae	Clostridium	Clostridium sp. MD294	12.5532	11.4563	11.6222	11.353	12.5815	13.9795	13.9626	12.6582	13.0848	12.2455	11.396	11.8426	12.0127	12.7073	10.6316	12.1116	12.1579	12.669	12.5845	12.2396	13.1671	11.2466	12.5437	13.4723
AAWEVDSGR	Mammalia	Class	Eukaryota	Metazoa	Chordata	Mammalia					14.1576	15.0358	15.3737	14.9774	13.4399	14.1338	12.3686	13.5052	13.1976	14.1186	13.4293	13.86	13.8426	13.4615	13.6972	13.9483	13.9797	14.4397	13.563	14.0044	13.1017	14.4315	13.9065	13.5513
AAWEVDSGRR	Mammalia	Class	Eukaryota	Metazoa	Chordata	Mammalia					12.1889	NA	NA	12.615	NA	13.8935	NA	12.7758	11.4997	NA	11.566	12.3665	13.2569	NA	NA	NA	NA	12.6823	NA	NA	12.4618	NA	13.0983	12.4708
AAWNALQDEVGR	Mammalia	Class	Eukaryota	Metazoa	Chordata	Mammalia					NA	11.876	NA	NA	NA	NA	NA	NA	NA	NA	NA	NA	NA	NA	NA	NA	NA	NA	NA	NA	NA	NA	NA	NA
AAWSPMGSTANISGR	Clostridiales	Order	Bacteria		Firmicutes	Clostridia	Clostridiales				NA	NA	12.4862	10.6809	13.8259	13.531	14.9731	14.5049	10.4806	NA	NA	NA	13.3754	14.0319	13.4913	14.1603	13.2362	11.3225	11.9346	11.9415	14.9567	NA	15.0194	13.6212
AAYDAFNSWK	Mus musculus	Species	Eukaryota	Metazoa	Chordata	Mammalia	Rodentia	Muridae	Mus	Mus musculus	10.7277	11.4518	NA	11.8308	NA	NA	NA	NA	NA	NA	NA	NA	NA	NA	NA	10.5293	NA	NA	12.4901	NA	NA	NA	NA	NA
AAYEAELGDAR	Chordata	Phylum	Eukaryota	Metazoa	Chordata						13.9708	14.8898	14.4053	14.1734	NA	NA	NA	NA	NA	NA	11.6904	NA	NA	NA	NA	NA	NA	NA	14.4274	NA	NA	NA	NA	NA
AAYEAELGDARK	Chordata	Phylum	Eukaryota	Metazoa	Chordata						12.444	11.9478	10.7071	12.3119	NA	12.9774	NA	NA	NA	NA	11.4227	NA	NA	NA	11.6664	NA	NA	11.7358	12.9838	11.4332	NA	NA	NA	12.8832
AAYEALSR	Bacteria	Superkingdom	Bacteria								16.5193	17.2353	16.5722	16.8975	14.4202	NA	NA	NA	16.4499	16.0248	16.6356	NA	NA	14.5647	15.8955	15.5844	NA	15.5761	15.3011	14.7581	NA	NA	NA	15.6776
AAYEEAEHAAK	Bacteria	Superkingdom	Bacteria								17.1233	17.0661	17.5385	17.9717	19.0853	18.5782	19.5501	15.6716	21.6874	17.6064	18.6891	15.6009	18.4478	19.0955	19.604	18.1796	18.8659	18.5337	19.1367	18.0382	21.7069	18.0917	16.216	18.9413
AAYENAIK	Bacteria	Superkingdom	Bacteria								18.0261	NA	NA	NA	NA	NA	17.0987	14.86	NA	NA	18.4672	19.628	NA	NA	NA	NA	NA	NA	17.2406	18.2285	NA	NA	NA	NA
AAYFCTNDAHTEPLLK	Firmicutes	Phylum	Bacteria		Firmicutes						NA	NA	NA	NA	NA	NA	NA	12.9517	NA	NA	NA	NA	12.7554	NA	NA	NA	NA	NA	NA	NA	NA	NA	12.5676	NA
AAYFGIYDTAK	Metazoa	Kingdom	Eukaryota	Metazoa							15.5441	18.3167	18.273	18.0274	16.2375	17.6095	13.9878	15.7285	16.5222	15.6768	15.5881	16.1801	16.6651	16.3734	16.8658	15.4876	16.0005	16.6191	16.4574	15.6544	14.2963	14.9515	16.8901	16.6921
AAYFGVYDTAK	Metazoa	Kingdom	Eukaryota	Metazoa							13.3703	14.078	14.0794	14.4437	13.2088	14.1698	12.2219	13.9019	13.2545	13.3405	12.9839	13.1054	11.7689	NA	12.9504	12.6236	13.8653	13.6709	12.8713	13.0242	13.0667	13.5434	13.2815	13.4947
AAYIVTGQWAK	Bacteria	Superkingdom	Bacteria								NA	11.0741	NA	NA	13.8457	13.3698	13.8643	13.9406	12.552	NA	NA	13.3698	13.6519	13.5631	13.1575	13.4626	13.3842	13.1579	13.2675	12.4087	13.5338	12.1402	14.1231	13.3753
AAYLDTGTWASNAIK	Bacteroidales	Order	Bacteria		Bacteroidetes	Bacteroidia	Bacteroidales				12.1179	13.1839	12.26	13.1161	11.3886	11.7089	11.3978	12.085	12.1193	NA	13.3323	10.8429	NA	11.4971	NA	NA	11.9368	NA	12.8216	11.8751	11.1926	NA	11.2143	11.6273
AAYLQTGVWAK	Bacteroidales	Order	Bacteria		Bacteroidetes	Bacteroidia	Bacteroidales				NA	NA	NA	NA	12.7601	13.1403	NA	13.0373	12.4896	NA	NA	NA	13.3357	NA	13.0373	NA	NA	NA	13.1708	12.1505	NA	NA	12.5509	12.2512
AAYTELTR	Phaeobacter gallaeciensis	Species	Bacteria		Proteobacteria	Alphaproteobacteria	Rhodobacterales	Rhodobacteraceae	Phaeobacter	Phaeobacter gallaeciensis	15.2022	NA	16.4557	NA	16.2144	11.6815	15.5316	13.6444	16.77	14.9656	15.9376	NA	15.0082	16.3063	15.3272	NA	17.388	14.632	14.7228	NA	16.4016	NA	15.7733	NA
AAYVQAIR	Clostridiales	Order	Bacteria		Firmicutes	Clostridia	Clostridiales				13.7892	13.5011	14.6354	13.9155	13.8876	13.9165	13.5873	14.1035	13.7291	13.135	14.4356	12.7645	13.3888	13.9173	14.1381	15.2982	14.4217	14.1622	14.0439	13.6588	14.0498	12.7608	14.2115	NA
ACAAYGPMYK	Firmicutes	Phylum	Bacteria		Firmicutes						12.9869	12.2585	12.4985	12.7185	14.2259	14.1272	14.1891	13.6601	14.4873	13.5351	13.6923	13.7432	14.7789	14.3571	12.5448	12.1504	14.299	14.19	14.4327	13.9698	14.694	14.2589	14.1323	11.8147
ACACAHGMLAEDGASCR	Mammalia	Class	Eukaryota	Metazoa	Chordata	Mammalia					NA	NA	NA	NA	NA	10.6241	NA	NA	NA	NA	NA	9.65621	10.5069	NA	NA	NA	NA	NA	NA	NA	NA	NA	NA	NA
ACADATLSQITNNIDPVGR	Mammalia	Class	Eukaryota	Metazoa	Chordata	Mammalia					NA	NA	NA	NA	NA	9.97304	NA	NA	NA	NA	NA	NA	10.2558	NA	NA	NA	NA	NA	NA	NA	NA	NA	NA	NA
ACADNGYEVDPEVSEFFSTHR	Lachnospiraceae bacterium MD335	Species	Bacteria		Firmicutes	Clostridia	Clostridiales	Lachnospiraceae		Lachnospiraceae bacterium MD335	NA	NA	NA	NA	NA	NA	NA	NA	NA	NA	NA	NA	12.4196	10.8797	NA	NA	NA	NA	NA	NA	NA	NA	11.3141	NA
ACALSIAESCRPGDK	Mammalia	Class	Eukaryota	Metazoa	Chordata	Mammalia					NA	NA	NA	NA	NA	NA	NA	NA	NA	NA	NA	10.2921	NA	NA	NA	NA	NA	NA	NA	NA	NA	NA	11.5524	NA
ACATYGPIYK	Bacteroidales	Order	Bacteria		Bacteroidetes	Bacteroidia	Bacteroidales				13.2272	14.4584	14.0329	14.2522	13.0345	12.9763	NA	12.6765	13.2608	NA	13.8423	NA	13.6693	13.2442	NA	12.9954	14.388	NA	14.1174	12.8451	13.9176	NA	13.8274	13.2518
ACATYGPLYK	Bacteria	Superkingdom	Bacteria								NA	NA	NA	NA	NA	13.1402	12.932	NA	11.8281	NA	NA	NA	12.7724	NA	11.5109	NA	NA	12.2804	NA	NA	NA	13.0197	13.1995	NA
ACATYGPMYK	Clostridium sp. KLE 1755	Species	Bacteria		Firmicutes	Clostridia	Clostridiales	Clostridiaceae	Clostridium	Clostridium sp. KLE 1755	NA	NA	NA	NA	13.2377	NA	NA	NA	11.5892	9.70654	NA	NA	13.9522	13.34	12.3954	NA	NA	NA	NA	NA	NA	NA	NA	NA
ACCLNVQR	Clostridium	Genus	Bacteria		Firmicutes	Clostridia	Clostridiales	Clostridiaceae	Clostridium		12.317	12.423	NA	13.4922	13.6748	12.7394	13.8878	NA	13.2188	12.3095	13.5368	14.1623	13.4993	13.6677	NA	13.9832	13.3949	12.1972	13.6679	14.9394	13.8286	13.626	13.1489	13.4127
ACDDCPFK	Mus musculus	Species	Eukaryota	Metazoa	Chordata	Mammalia	Rodentia	Muridae	Mus	Mus musculus	11.2511	12.9634	11.7913	13.2614	11.8271	12.9948	NA	11.3537	12.2761	11.6057	10.954	11.7913	12.1031	11.7093	NA	11.6479	11.421	12.4653	NA	11.3822	NA	11.5985	12.5503	12.5573
ACDFPLEK	Lachnospiraceae bacterium MD335	Species	Bacteria		Firmicutes	Clostridia	Clostridiales	Lachnospiraceae		Lachnospiraceae bacterium MD335	11.2515	NA	12.3986	NA	14.1284	NA	NA	12.1083	13.4742	11.7712	13.3159	13.807	13.2629	14.0545	11.4126	14.3543	14.6798	12.0384	14.3067	13.3637	12.1342	11.941	13.6085	12.5175
ACDLWEQILR	Mammalia	Class	Eukaryota	Metazoa	Chordata	Mammalia					NA	11.891	NA	11.7258	NA	NA	NA	NA	NA	NA	NA	NA	NA	NA	NA	NA	NA	NA	NA	NA	NA	NA	NA	NA
ACDSGGILDNKPK	Mus musculus	Species	Eukaryota	Metazoa	Chordata	Mammalia	Rodentia	Muridae	Mus	Mus musculus	18.1408	18.7699	19.4938	19.6391	17.8083	17.4862	16.9249	17.0167	17.585	18.218	17.3736	14.5779	17.5941	17.8865	15.2036	17.5783	18.7137	17.2183	17.0201	17.4858	18.0838	18.0838	18.5539	16.7142
ACDVLKR	Clostridiales	Order	Bacteria		Firmicutes	Clostridia	Clostridiales				NA	NA	NA	NA	NA	NA	11.2691	NA	NA	NA	NA	NA	NA	NA	NA	NA	NA	NA	NA	NA	NA	NA	NA	NA
ACEIFAK	Lachnospiraceae	Family	Bacteria		Firmicutes	Clostridia	Clostridiales	Lachnospiraceae			NA	NA	NA	NA	12.4753	NA	NA	NA	NA	NA	NA	NA	NA	12.3031	10.8375	NA	12.5065	NA	NA	NA	NA	NA	12.9792	NA
ACFGYAIDTK	Lachnospiraceae	Family	Bacteria		Firmicutes	Clostridia	Clostridiales	Lachnospiraceae			12.6766	NA	NA	NA	12.4754	NA	12.8374	NA	NA	NA	10.7873	12.7811	NA	NA	NA	NA	12.3045	NA	NA	NA	NA	NA	NA	NA
ACFGYALDTK	Clostridium	Genus	Bacteria		Firmicutes	Clostridia	Clostridiales	Clostridiaceae	Clostridium		10.8555	NA	NA	NA	NA	NA	NA	NA	11.7845	NA	NA	NA	NA	12.4833	NA	NA	NA	NA	NA	NA	NA	11.3224	NA	NA
ACFVLDAIR	Bacteria	Superkingdom	Bacteria								17.6185	16.2115	15.8359	16.5108	18.4355	17.8499	18.5378	18.9142	17.6551	16.5626	17.5388	16.7325	18.1545	18.5059	16.0916	17.3446	18.2106	17.0021	18.6834	17.8188	16.8231	18.0826	18.0574	17.654
ACGDSTLTQITAGLDPVGR	Chordata	Phylum	Eukaryota	Metazoa	Chordata						NA	NA	NA	NA	NA	9.84379	NA	NA	NA	NA	NA	NA	10.1737	NA	NA	NA	NA	NA	9.88126	NA	NA	NA	NA	NA
ACGGSDTLATGYILSK	Firmicutes	Phylum	Bacteria		Firmicutes						9.85225	10.256	NA	11.0029	12.1177	12.6213	12.4875	11.8636	11.0323	NA	10.9482	NA	12.6911	11.5611	10.6971	11.5017	12.0656	11.2822	11.9786	11.2704	10.837	11.0279	12.6237	12.1703
ACGGYIFK	Roseburia faecis	Species	Bacteria		Firmicutes	Clostridia	Clostridiales	Lachnospiraceae	Roseburia	Roseburia faecis	NA	NA	NA	NA	NA	NA	NA	NA	NA	NA	NA	NA	NA	NA	NA	NA	12.6075	NA	NA	NA	NA	NA	NA	NA
ACIAEIYDDATAAAIR	Clostridiales	Order	Bacteria		Firmicutes	Clostridia	Clostridiales				NA	NA	NA	NA	11.2451	NA	11.6045	NA	11.971	NA	10.7982	NA	NA	11.5246	NA	NA	10.7675	NA	NA	NA	NA	NA	11.8101	NA
ACIAEMYDQATADAVR	Eubacterium plexicaudatum	Species	Bacteria		Firmicutes	Clostridia	Clostridiales	Eubacteriaceae	Eubacterium	Eubacterium plexicaudatum	12.8736	11.3541	9.1002	11.9087	13.2402	13.3912	NA	11.7111	12.8529	11.7027	12.338	NA	13.0493	13.3939	11.4713	11.4063	13.1546	12.0542	13.6563	12.1114	11.915	13.8512	14.7928	15.191
ACIAEVYDDATAAEIR	Clostridium	Genus	Bacteria		Firmicutes	Clostridia	Clostridiales	Clostridiaceae	Clostridium		NA	NA	NA	NA	13.5332	14.036	14.9647	13.471	12.3878	NA	11.6844	11.2901	14.1904	13.7924	12.3692	11.7546	12.4218	NA	11.531	NA	NA	13.2418	13.2302	15.0614
ACLEATDWCR	Streptococcus	Genus	Bacteria		Firmicutes	Bacilli	Lactobacillales	Streptococcaceae	Streptococcus		NA	NA	NA	NA	12.4112	11.7263	11.7494	NA	11.4966	NA	NA	NA	11.6387	NA	NA	NA	11.5816	NA	NA	NA	NA	12.0291	12.5264	NA
ACLFGNEALK	Mucispirillum schaedleri	Species	Bacteria		Deferribacteres	Deferribacteres	Deferribacterales	Deferribacteraceae	Mucispirillum	Mucispirillum schaedleri	NA	NA	NA	NA	12.8998	NA	NA	NA	NA	NA	NA	NA	13.0072	NA	NA	NA	NA	13.0072	NA	12.4129	12.1336	11.955	13.4703	14.0802
ACLISLGYDVENDR	Chordata	Phylum	Eukaryota	Metazoa	Chordata						NA	10.6592	NA	10.9057	NA	10.5459	NA	NA	NA	NA	NA	NA	NA	NA	NA	NA	NA	NA	NA	NA	NA	NA	NA	NA
ACLSCGATYHVEFNPTK	Eubacterium plexicaudatum	Species	Bacteria		Firmicutes	Clostridia	Clostridiales	Eubacteriaceae	Eubacterium	Eubacterium plexicaudatum	NA	NA	NA	NA	NA	NA	NA	NA	NA	NA	NA	NA	NA	10.0801	NA	NA	NA	NA	NA	NA	NA	NA	NA	NA
ACLVNVVK	Bacteria	Superkingdom	Bacteria								11.8155	11.5261	NA	11.474	NA	11.9716	13.2995	NA	NA	12.476	NA	12.6877	11.0645	NA	NA	NA	12.6659	13.0025	NA	NA	12.302	12.7185	13.6518	13.6807
ACMDYPVR	Mus musculus	Species	Eukaryota	Metazoa	Chordata	Mammalia	Rodentia	Muridae	Mus	Mus musculus	15.5247	15.9309	17.2504	16.3305	15.1833	15.7928	14.7668	15.1493	15.3329	16.2562	15.1183	15.0174	14.766	15.3169	NA	15.1711	16.0707	15.3937	14.706	15.1099	15.4514	15.6652	15.6745	14.6886
ACMDYPVRK	Mus musculus	Species	Eukaryota	Metazoa	Chordata	Mammalia	Rodentia	Muridae	Mus	Mus musculus	13.4142	NA	NA	14.6125	NA	14.1178	13.414	14.2072	13.5379	14.2748	13.1226	13.1783	12.9001	NA	NA	NA	NA	13.183	13.1002	13.6128	13.9608	13.6827	14.0261	13.5275
ACNCLLLK	Eukaryota	Superkingdom	Eukaryota								12.0461	13.9006	12.0034	12.0737	NA	12.6701	10.6627	NA	12.1107	11.4403	NA	NA	11.7928	11.1515	NA	11.3296	12.1083	11.9035	11.3159	12.1967	11.9196	12.1832	12.5128	NA
ACNYGCMGFGSCVK	Clostridiales	Order	Bacteria		Firmicutes	Clostridia	Clostridiales				9.41475	NA	NA	NA	10.3043	11.8737	NA	NA	NA	10.0051	NA	NA	11.0434	9.703	NA	10.5826	NA	NA	11.0229	NA	11.2506	NA	10.9947	12.4372
ACQAYGPLYK	Firmicutes	Phylum	Bacteria		Firmicutes						NA	12.2889	NA	12.7183	13.645	13.8325	14.9709	14.5414	13.954	11.5667	13.7272	12.766	13.2858	13.8351	12.0919	13.1194	14.1646	13.3915	13.1026	12.6497	13.2766	13.2616	NA	13.9052
ACSDNGYEVDPEISEFFSTHR	Lachnospiraceae bacterium 28-4	Species	Bacteria		Firmicutes	Clostridia	Clostridiales	Lachnospiraceae		Lachnospiraceae bacterium 28-4	NA	NA	NA	NA	11.6407	12.046	NA	11.5381	NA	NA	NA	NA	12.9731	NA	10.9845	NA	11.1492	NA	12.5745	NA	NA	NA	12.0961	NA
ACSDNGYEVDPEVSEFFSTHR	Lachnospiraceae bacterium A4	Species	Bacteria		Firmicutes	Clostridia	Clostridiales	Lachnospiraceae		Lachnospiraceae bacterium A4	NA	NA	NA	NA	11.7349	11.161	12.0503	12.1805	NA	NA	NA	11.8729	NA	11.7781	NA	NA	10.2506	NA	12.6492	NA	NA	NA	11.7499	NA
ACSEAFYK	Blautia	Genus	Bacteria		Firmicutes	Clostridia	Clostridiales	Lachnospiraceae	Blautia		12.9405	11.4956	10.9471	11.3599	13.7734	12.5506	13.9653	NA	12.6116	11.6597	12.3803	NA	14.3043	13.876	NA	12.0046	13.1278	11.818	13.651	12.2649	NA	12.135	13.8839	12.8332
ACSEELGEYHVYK	Mus musculus	Species	Eukaryota	Metazoa	Chordata	Mammalia	Rodentia	Muridae	Mus	Mus musculus	17.6534	18.694	19.1014	18.53	17.7407	17.244	16.8722	11.7796	19.3043	18.7838	17.2187	17.3758	17.9964	17.8859	14.7853	17.5895	18.5734	17.3777	17.4151	17.1419	18.938	18.2541	15.4597	16.8888
ACSSVFSEPPVDDLYMER	Lachnospiraceae bacterium A4	Species	Bacteria		Firmicutes	Clostridia	Clostridiales	Lachnospiraceae		Lachnospiraceae bacterium A4	NA	NA	NA	NA	10.3178	NA	NA	NA	NA	NA	NA	NA	NA	10.3086	NA	NA	NA	NA	NA	NA	NA	NA	NA	NA
ACSVGCIGCK	Lachnospiraceae	Family	Bacteria		Firmicutes	Clostridia	Clostridiales	Lachnospiraceae			NA	NA	NA	12.6466	12.9903	NA	14.285	13.097	13.7875	NA	12.3353	12.2111	12.7678	13.4007	NA	NA	13.017	NA	13.1745	NA	12.2729	11.5922	13.0849	12.5437
ACTDLMLSK	Bacteria	Superkingdom	Bacteria								NA	NA	NA	NA	NA	NA	12.5116	NA	NA	NA	NA	NA	NA	NA	NA	NA	NA	NA	12.9511	NA	NA	NA	NA	14.1258
ACTIAIR	Eukaryota	Superkingdom	Eukaryota								NA	13.1422	NA	13.2908	NA	12.963	NA	NA	NA	NA	12.2493	NA	NA	NA	NA	NA	11.5228	NA	NA	NA	NA	NA	NA	12.9422
ACTQDLNVMQYIAYAQR	Clostridiales	Order	Bacteria		Firmicutes	Clostridia	Clostridiales				NA	NA	NA	11.096	12.0016	12.636	13.6113	12.1924	9.94412	NA	NA	NA	11.9629	12.2562	10.7207	NA	12.2068	NA	11.9939	NA	NA	NA	10.1801	12.0475
ACVDAGWIEK	Clostridiales	Order	Bacteria		Firmicutes	Clostridia	Clostridiales				12.5876	12.7041	12.0404	12.4205	13.7866	14.6041	13.8015	12.3016	12.2926	NA	12.722	12.5625	13.6356	13.7068	12.1129	12.8675	12.0795	13.3194	14.0056	13.7013	13.6975	11.569	14.4922	15.0397
ACVDAGWIEKDR	Clostridiales	Order	Bacteria		Firmicutes	Clostridia	Clostridiales				NA	NA	NA	NA	NA	13.9997	13.7721	11.0475	10.7283	NA	NA	11.0524	12.6833	NA	NA	NA	NA	11.6163	12.7979	NA	11.2338	NA	13.7082	14.7194
ACVDAGWITADHQVGQTGK	Firmicutes	Phylum	Bacteria		Firmicutes						NA	NA	NA	NA	10.2501	11.9045	NA	NA	NA	NA	NA	NA	11.9549	10.305	NA	NA	NA	NA	11.5735	NA	NA	NA	11.8254	11.3466
ACVGALAVGIAR	Firmicutes	Phylum	Bacteria		Firmicutes						11.1502	12.4032	10.9494	12.2761	13.7708	13.9161	13.2127	11.7226	13.7767	11.0828	12.8922	11.218	14.4425	13.0691	11.4704	13.3036	14.1826	13.1764	13.3118	13.1021	13.3217	13.3456	14.2233	13.3965
ACVNMDQGGAIVDLRPYAAK	Clostridiales	Order	Bacteria		Firmicutes	Clostridia	Clostridiales				NA	NA	NA	NA	12.8956	12.1019	10.2762	NA	10.7592	NA	11.3287	12.3785	13.5843	12.7684	11.3184	11.8476	11.7738	11.145	12.7277	11.4278	NA	11.3407	12.9445	12.4102
ACVNMDQGGAIVDLRPYVAK	Clostridiales	Order	Bacteria		Firmicutes	Clostridia	Clostridiales				NA	NA	NA	NA	13.8356	13.1601	14.4034	13.0353	12.7629	NA	13.0261	12.0289	13.0729	13.58	11.9826	11.8623	12.0673	NA	12.1198	12.8607	NA	12.3496	13.1938	NA
ACVTIER	Arthrobotrys oligospora	Species	Eukaryota	Fungi	Ascomycota	Orbiliomycetes	Orbiliales	Orbiliaceae	Arthrobotrys	Arthrobotrys oligospora	NA	NA	NA	NA	13.606	NA	14.6195	NA	NA	NA	13.7856	NA	NA	13.6537	NA	NA	NA	NA	13.4966	12.2455	NA	13.3963	NA	NA
ACVVHGSDLK	Metazoa	Kingdom	Eukaryota	Metazoa							NA	13.5487	NA	12.8623	NA	NA	NA	NA	NA	NA	10.6074	10.9352	13.0947	11.4962	NA	NA	NA	NA	12.6275	11.2491	NA	NA	13.3705	13.003
ACYGVLR	Eukaryota	Superkingdom	Eukaryota								14.317	14.7219	NA	15.0902	NA	14.776	13.1932	14.5987	14.8046	14.2642	13.8972	14.2616	14.2639	NA	11.9615	14.2248	15.4269	14.5254	13.8719	14.2324	13.9782	14.7888	15.3481	14.4034
ACYSSALDILYSSC	Mammalia	Class	Eukaryota	Metazoa	Chordata	Mammalia					11.977	13.9242	NA	13.6711	12.9888	12.4981	11.6033	11.3174	12.4733	12.1647	11.7361	12.3856	12.1839	12.9895	NA	12.5786	12.1588	9.98154	12.0174	12.7365	12.6316	13.3229	13.2892	11.7178
ACYVLDAIR	Clostridiales	Order	Bacteria		Firmicutes	Clostridia	Clostridiales				14.4966	13.8993	NA	14.1123	14.94	15.2369	15.8485	14.5657	14.6713	13.3277	15.0338	14.6827	NA	15.1891	12.8048	13.2157	15.2787	13.7589	15.1336	14.4821	13.772	14.5571	NA	13.9017
ADAALKDAFAK	Eubacterium plexicaudatum	Species	Bacteria		Firmicutes	Clostridia	Clostridiales	Eubacteriaceae	Eubacterium	Eubacterium plexicaudatum	NA	NA	NA	NA	NA	NA	NA	NA	NA	NA	NA	NA	NA	NA	NA	NA	NA	NA	NA	NA	NA	NA	NA	12.6361
ADAAPTVSIFPPSSEQLTSGGASVVCFLNNFYPK	Metazoa	Kingdom	Eukaryota	Metazoa							NA	NA	NA	NA	11.7899	10.4389	11.1459	11.6368	11.8458	NA	NA	NA	11.4156	NA	NA	NA	13.0712	11.2324	13.2461	NA	12.8036	NA	12.935	10.0578
ADADLVAEITK	Lachnospiraceae bacterium M18-1	Species	Bacteria		Firmicutes	Clostridia	Clostridiales	Lachnospiraceae		Lachnospiraceae bacterium M18-1	NA	12.8106	NA	12.9118	13.5592	13.1576	13.3204	12.8536	11.9536	NA	11.4524	11.0967	13.2307	13.6191	14.378	12.7955	12.0796	13.2435	13.1116	11.788	12.1583	12.5761	12.2227	14.2007
ADADLVAEITKK	Lachnospiraceae bacterium M18-1	Species	Bacteria		Firmicutes	Clostridia	Clostridiales	Lachnospiraceae		Lachnospiraceae bacterium M18-1	NA	NA	NA	NA	NA	15.3665	NA	13.525	NA	NA	NA	11.3774	14.0036	13.092	NA	NA	NA	NA	13.0831	NA	10.1067	NA	12.4408	15.9361
ADAECYTALK	Chordata	Phylum	Eukaryota	Metazoa	Chordata						11.3352	12.372	11.6697	12.2785	NA	12.0473	NA	NA	NA	NA	NA	NA	NA	NA	NA	NA	NA	NA	NA	NA	NA	NA	NA	11.9863
ADAENYLGEK	Bacteria	Superkingdom	Bacteria								NA	11.3722	11.8809	11.7054	13.1358	12.7078	NA	11.6894	12.0712	NA	NA	NA	13.1305	12.9027	13.4253	12.477	12.3482	NA	13.4166	12.3696	NA	11.0401	12.4904	12.8658
ADAESYLGEK	Bacteria	Superkingdom	Bacteria								14.3081	11.7706	13.4033	NA	14.4191	13.7358	14.3383	NA	13.5007	NA	NA	13.6598	15.2352	14.5206	14.276	13.026	13.3391	NA	14.6415	NA	13.7801	NA	14.6441	14.496
ADAEVLRK	Metazoa	Kingdom	Eukaryota	Metazoa							NA	NA	NA	NA	NA	12.292	NA	NA	NA	NA	NA	NA	NA	12.2987	NA	12.5556	11.4596	11.9243	11.9751	12.2026	NA	NA	NA	12.3055
ADAEYYAAHK	Mammalia	Class	Eukaryota	Metazoa	Chordata	Mammalia					10.5001	11.0632	NA	NA	NA	11.8557	NA	NA	NA	NA	NA	NA	NA	NA	10.1402	NA	NA	NA	10.5246	10.0695	NA	NA	NA	10.7872
ADAGFEFMQK	Bacteria	Superkingdom	Bacteria								14.8524	16.3432	16.5166	15.7935	14.0501	14.0224	12.6015	14.1685	14.3809	10.8722	15.5343	NA	14.6509	14.3182	15.5663	14.5118	14.8441	12.9792	15.4965	14.1196	15.2311	11.3096	15.0715	15.3528
ADAIMDDYNMGLITNNER	Alistipes	Genus	Bacteria		Bacteroidetes	Bacteroidia	Bacteroidales	Rikenellaceae	Alistipes		NA	NA	NA	11.3948	NA	10.324	NA	NA	NA	NA	9.56583	NA	12.1512	10.8793	NA	NA	NA	NA	10.9492	NA	NA	NA	11.4329	10.8335
ADAITAFSAAIATK	Lachnospiraceae bacterium A2	Species	Bacteria		Firmicutes	Clostridia	Clostridiales	Lachnospiraceae		Lachnospiraceae bacterium A2	NA	NA	14.898	NA	NA	NA	NA	NA	NA	NA	NA	NA	NA	NA	NA	14.4741	NA	NA	NA	NA	12.0889	NA	NA	NA
ADALQAGASQFETSAAK	Chordata	Phylum	Eukaryota	Metazoa	Chordata						NA	NA	NA	10.9813	NA	10.5427	NA	NA	NA	NA	NA	NA	NA	NA	NA	NA	NA	NA	NA	NA	NA	NA	NA	NA
ADALQYLDAEK	Clostridiales	Order	Bacteria		Firmicutes	Clostridia	Clostridiales				NA	NA	15.3711	NA	14.9763	15.6061	17.0251	15.7832	NA	NA	NA	NA	14.1988	15.1867	14.1405	16.7103	14.1503	14.413	NA	NA	16.7658	NA	15.2284	NA
ADAPAVYDALGNEISLATDVVAK	Lachnospiraceae bacterium MD335	Species	Bacteria		Firmicutes	Clostridia	Clostridiales	Lachnospiraceae		Lachnospiraceae bacterium MD335	14.4731	10.9121	15.0646	11.298	15.9419	14.1193	13.9804	13.617	13.5388	15.3018	13.9288	14.5636	16.7954	15.9	15.2549	16.032	15.2184	13.736	14.9007	14.6943	15.8665	14.9588	16.0022	15.8888
ADAPAVYDALGNEISLATVISTDK	Lachnospiraceae bacterium MD335	Species	Bacteria		Firmicutes	Clostridia	Clostridiales	Lachnospiraceae		Lachnospiraceae bacterium MD335	NA	NA	8.25183	NA	9.25927	NA	NA	NA	NA	NA	NA	NA	8.31776	8.63409	8.66614	NA	8.66816	NA	NA	NA	NA	NA	NA	7.96891
ADAPAVYDALGNEISLATVISTDKR	Lachnospiraceae bacterium MD335	Species	Bacteria		Firmicutes	Clostridia	Clostridiales	Lachnospiraceae		Lachnospiraceae bacterium MD335	11.0458	NA	11.6186	9.92728	13.3636	12.268	11.8523	12.4912	10.8052	12.2005	11.2086	12.4601	12.7365	13.4001	12.5696	12.1022	13.298	12.1873	12.7064	11.9718	12.3002	11.1984	12.7646	12.981
ADAPAVYDALGNEISLK	Lachnospiraceae bacterium MD335	Species	Bacteria		Firmicutes	Clostridia	Clostridiales	Lachnospiraceae		Lachnospiraceae bacterium MD335	16.0114	NA	16.1418	NA	16.802	15.591	14.7349	15.4493	16.2011	16.5443	16.2336	16.6781	16.8949	17.1009	15.6614	17.243	17.4978	16.0605	17.1331	16.8073	16.7374	16.2323	16.66	16.1405
ADATLLEPIMK	Oscillibacter valericigenes	Species	Bacteria		Firmicutes	Clostridia	Clostridiales	Oscillospiraceae	Oscillibacter	Oscillibacter valericigenes	NA	NA	NA	NA	NA	NA	NA	NA	NA	NA	NA	NA	12.0785	NA	12.4522	NA	NA	NA	NA	NA	NA	NA	11.2358	NA
ADAWAAEYAK	Eubacterium plexicaudatum	Species	Bacteria		Firmicutes	Clostridia	Clostridiales	Eubacteriaceae	Eubacterium	Eubacterium plexicaudatum	NA	NA	NA	NA	NA	NA	12.7856	15.0205	11.503	NA	NA	NA	NA	NA	NA	NA	NA	NA	NA	NA	NA	NA	NA	NA
ADCGCTYQLR	Rodentia	Order	Eukaryota	Metazoa	Chordata	Mammalia	Rodentia				14.7471	15.4852	15.8424	15.5495	13.7523	14.0391	13.0948	13.9102	14.1375	15.3605	13.401	14.4974	13.7541	13.9462	NA	13.9601	14.647	13.5268	13.6872	13.9756	14.9158	14.8298	14.29	12.8834
ADCPFCK	Eubacterium plexicaudatum	Species	Bacteria		Firmicutes	Clostridia	Clostridiales	Eubacteriaceae	Eubacterium	Eubacterium plexicaudatum	NA	NA	NA	NA	12.3271	13.1986	NA	NA	NA	NA	11.9603	NA	NA	12.6744	NA	12.7814	12.3149	12.3673	12.3	NA	12.585	12.4026	NA	13.9708
ADCTGQVSDINLMGYGK	Rodentia	Order	Eukaryota	Metazoa	Chordata	Mammalia	Rodentia				17.6617	18.2766	18.6528	18.0834	16.042	16.4431	15.3767	16.1455	16.3103	17.0923	15.7309	16.4559	15.9751	16.0076	13.5532	16.3277	16.7636	16.0442	15.8514	16.083	17.2315	17.2405	16.6303	15.3651
ADDALWLFPTVYK	Firmicutes	Phylum	Bacteria		Firmicutes						15.1177	NA	NA	NA	15.7548	15.3883	16.582	15.3181	15.1663	14.3494	14.6143	16.0205	15.573	15.8911	15.9373	13.9073	15.0696	15.3129	15.578	NA	14.301	15.2429	15.9769	15.529
ADDANTEGSDETEGSDEAEGGDTSDAADQTLK	Lachnospiraceae bacterium A2	Species	Bacteria		Firmicutes	Clostridia	Clostridiales	Lachnospiraceae		Lachnospiraceae bacterium A2	NA	NA	8.24595	NA	NA	NA	NA	NA	NA	NA	NA	NA	NA	NA	NA	9.7173	NA	NA	NA	7.44762	7.85154	NA	NA	NA
ADDDTYVIVDNLR	Metazoa	Kingdom	Eukaryota	Metazoa							NA	NA	NA	11.4555	NA	11.4881	NA	NA	11.9128	NA	NA	11.439	10.9253	NA	NA	NA	NA	NA	NA	10.2128	NA	NA	11.2452	NA
ADDLLNFR	Pontibacter sp. BAB1700	Species	Bacteria		Bacteroidetes	Cytophagia	Cytophagales	Hymenobacteraceae	Pontibacter	Pontibacter sp. BAB1700	NA	10.6709	NA	NA	13.6214	13.3781	14.5101	14.6705	10.7724	NA	11.4706	NA	11.3786	13.3748	12.9298	14.1723	11.7893	NA	13.3465	NA	13.9073	11.9454	14.2934	NA
ADDTIISAASCTTNCLAPMAK	Dichelobacter nodosus	Species	Bacteria		Proteobacteria	Gammaproteobacteria	Cardiobacteriales	Cardiobacteriaceae	Dichelobacter	Dichelobacter nodosus	NA	NA	NA	10.3451	12.3702	NA	NA	10.1129	NA	NA	11.5493	10.8043	NA	12.1885	NA	11.9554	NA	12.0043	12.4013	11.6435	12.2511	12.8346	10.9852	12.9962
ADDVVWVR	Mammalia	Class	Eukaryota	Metazoa	Chordata	Mammalia					NA	13.6018	NA	13.5245	NA	12.0648	NA	NA	NA	NA	NA	NA	NA	NA	NA	NA	NA	NA	NA	NA	NA	NA	NA	NA
ADDWDFASNKK	Lachnospiraceae bacterium MD335	Species	Bacteria		Firmicutes	Clostridia	Clostridiales	Lachnospiraceae		Lachnospiraceae bacterium MD335	10.3792	NA	NA	NA	NA	NA	NA	NA	11.037	12.0062	NA	11.1585	NA	NA	NA	NA	12.0981	NA	11.7153	10.8675	11.8433	NA	NA	NA
ADDYDLLVTTGK	Hungatella hathewayi	Species	Bacteria		Firmicutes	Clostridia	Clostridiales	Clostridiaceae	Hungatella	Hungatella hathewayi	12.053	11.0402	10.3615	11.0306	13.6525	12.9451	14.1027	13.9156	13.6076	11.8925	13.6241	13.4645	12.3024	13.5694	13.8122	12.3344	13.7247	14.4201	15.169	13.5984	11.9048	11.6807	13.5719	12.7418
ADEAQAAGADFVGAEELIPK	Clostridiales	Order	Bacteria		Firmicutes	Clostridia	Clostridiales				NA	NA	NA	NA	NA	NA	NA	11.2292	NA	NA	NA	NA	11.2706	10.8596	11.1804	NA	NA	NA	NA	NA	NA	NA	10.9142	11.9752
ADEAQAAGADYVGAEELIPK	Clostridiales	Order	Bacteria		Firmicutes	Clostridia	Clostridiales				NA	11.1177	10.6272	11.4764	11.9754	NA	12.7319	10.613	NA	NA	11.1394	11.3054	12.1461	12.3857	12.1035	NA	11.2789	NA	11.2413	11.9659	NA	12.2737	11.4629	12.2766
ADEAYLIGR	Metazoa	Kingdom	Eukaryota	Metazoa							NA	12.6491	12.6006	NA	NA	12.6712	NA	NA	NA	NA	NA	NA	NA	NA	NA	NA	NA	NA	NA	NA	NA	NA	NA	NA
ADEETLNANTLPVELGTVIATEIK	Lachnospiraceae bacterium A4	Species	Bacteria		Firmicutes	Clostridia	Clostridiales	Lachnospiraceae		Lachnospiraceae bacterium A4	NA	NA	NA	NA	9.27244	9.31198	NA	NA	NA	NA	NA	NA	NA	9.6283	NA	NA	NA	NA	NA	NA	NA	NA	NA	NA
ADEETLNANTLPVELGTVIATEIKTDK	Lachnospiraceae bacterium A4	Species	Bacteria		Firmicutes	Clostridia	Clostridiales	Lachnospiraceae		Lachnospiraceae bacterium A4	NA	NA	NA	NA	9.13888	10.176	9.88591	NA	NA	NA	NA	NA	NA	10.3585	NA	NA	NA	NA	NA	NA	NA	NA	NA	NA
ADEGLASLSEDGR	Mammalia	Class	Eukaryota	Metazoa	Chordata	Mammalia					NA	NA	NA	12.3778	NA	11.8669	NA	12.0664	12.638	NA	NA	12.1877	12.5081	NA	NA	NA	NA	11.8012	12.2894	NA	12.1873	NA	12.8894	NA
ADEIAAWLVR	Lactobacillus	Genus	Bacteria		Firmicutes	Bacilli	Lactobacillales	Lactobacillaceae	Lactobacillus		NA	NA	NA	NA	NA	NA	NA	10.5096	NA	NA	NA	11.5471	NA	NA	NA	NA	NA	NA	NA	NA	NA	NA	NA	NA
ADEIEDNIK	Lactobacillus	Genus	Bacteria		Firmicutes	Bacilli	Lactobacillales	Lactobacillaceae	Lactobacillus		15.1895	14.8748	14.9072	14.1539	NA	13.4117	NA	14.5236	14.0502	14.2191	14.1186	14.912	13.1182	NA	NA	13.4229	14.2522	13.2821	NA	14.6881	13.4364	13.1406	12.5625	NA
ADEVKIEK	Lachnospiraceae bacterium MD335	Species	Bacteria		Firmicutes	Clostridia	Clostridiales	Lachnospiraceae		Lachnospiraceae bacterium MD335	NA	NA	NA	NA	NA	NA	NA	NA	NA	NA	11.5611	NA	NA	NA	NA	NA	NA	12.266	NA	NA	NA	11.7441	NA	NA
ADEWFQK	Lachnospiraceae bacterium A4	Species	Bacteria		Firmicutes	Clostridia	Clostridiales	Lachnospiraceae		Lachnospiraceae bacterium A4	NA	NA	NA	NA	NA	14.4014	15.488	12.0893	NA	NA	NA	NA	NA	NA	NA	NA	15.7825	14.6448	NA	13.1255	NA	NA	14.1268	NA
ADEWLMK	Chordata	Phylum	Eukaryota	Metazoa	Chordata						10.8401	12.7382	12.2638	13.1266	NA	12.6924	NA	11.6812	NA	11.0208	NA	NA	NA	NA	11.1478	NA	10.7649	12.455	11.8241	NA	NA	NA	NA	NA
ADFAQACQDAGVR	Mammalia	Class	Eukaryota	Metazoa	Chordata	Mammalia					12.5999	13.4373	12.3686	12.1251	NA	13.2749	NA	NA	NA	NA	NA	NA	NA	9.5672	NA	NA	NA	10.8797	NA	NA	NA	NA	11.5393	11.1061
ADFCIIHYAGK	Chordata	Phylum	Eukaryota	Metazoa	Chordata						NA	NA	NA	NA	NA	12.2508	NA	NA	NA	NA	NA	NA	NA	NA	NA	NA	NA	NA	9.75962	NA	NA	NA	NA	NA
ADFDMLDTFIADHAIR	Clostridiales	Order	Bacteria		Firmicutes	Clostridia	Clostridiales				NA	NA	NA	11.2483	11.3618	13.172	NA	12.4668	NA	NA	NA	10.3322	12.6713	12.1805	12.4949	11.0714	12.2062	10.559	12.422	NA	10.476	9.98748	11.8167	11.9665
ADFDNTVAIHPTSSEELVTLR	Chordata	Phylum	Eukaryota	Metazoa	Chordata						NA	NA	NA	NA	NA	12.078	NA	11.3149	NA	NA	NA	NA	12.0486	NA	NA	NA	NA	NA	NA	NA	NA	NA	12.0632	11.2443
ADFGYNAR	Bacteria	Superkingdom	Bacteria								13.1027	13.5506	14.2719	15.2111	14.3766	14.4062	12.4212	13.3974	14.1771	14.1961	14.3964	13.1463	13.4038	14.3746	14.0621	13.4998	14.176	12.8339	15.0102	13.8023	13.028	NA	14.5485	13.7027
ADFISNYWDADK	Bacteroides	Genus	Bacteria		Bacteroidetes	Bacteroidia	Bacteroidales	Bacteroidaceae	Bacteroides		12.5041	13.1694	14.5304	NA	12.7697	16.6804	13.4715	15.0491	NA	NA	NA	NA	12.4087	12.906	14.4884	11.817	15.319	15.0813	NA	NA	9.9496	NA	13.0627	13.9342
ADFISNYWDADKTYTK	Bacteroides	Genus	Bacteria		Bacteroidetes	Bacteroidia	Bacteroidales	Bacteroidaceae	Bacteroides		NA	NA	NA	NA	NA	14.7148	10.1876	12.2984	NA	NA	NA	NA	10.7326	NA	NA	NA	NA	NA	NA	NA	8.92583	NA	10.8798	11.7279
ADFQGISPER	Mammalia	Class	Eukaryota	Metazoa	Chordata	Mammalia					NA	14.6962	14.1028	14.8555	12.9336	13.9055	NA	13.0174	13.196	12.9572	12.9598	13.2509	13.8893	12.8211	13.3337	12.9627	NA	13.4104	12.6743	12.9855	11.9436	NA	14.5608	13.5478
ADFSGMSSK	Mammalia	Class	Eukaryota	Metazoa	Chordata	Mammalia					18.8734	20.9553	21.2019	21.0717	18.5043	18.1633	17.2879	18.6906	18.6207	18.8368	16.4666	19.0068	17.5283	18.4338	17.2388	19.3633	18.4728	19.2632	16.3422	19.0099	18.7015	18.6378	19.2792	18.119
ADFSPESPDLDLR	Mus musculus	Species	Eukaryota	Metazoa	Chordata	Mammalia	Rodentia	Muridae	Mus	Mus musculus	NA	NA	NA	NA	NA	11.7027	NA	NA	NA	NA	NA	NA	NA	NA	NA	NA	NA	11.8988	NA	NA	NA	NA	NA	NA
ADFTFYGGIYR	Firmicutes	Phylum	Bacteria		Firmicutes						NA	NA	NA	NA	NA	14.6444	NA	12.0999	12.702	NA	11.5467	12.0044	13.3079	12.6599	12.7429	NA	NA	12.2783	12.3297	NA	10.6703	NA	12.6599	NA
ADFTFYGGLYR	Clostridiales	Order	Bacteria		Firmicutes	Clostridia	Clostridiales				NA	NA	NA	10.0999	12.8622	14.0206	12.8975	NA	NA	NA	NA	NA	NA	NA	12.1046	11.7714	12.523	NA	NA	11.1317	NA	NA	NA	NA
ADFTIIAAPGFK	Leptotrichia buccalis	Species	Bacteria		Fusobacteria	Fusobacteriia	Fusobacteriales	Leptotrichiaceae	Leptotrichia	Leptotrichia buccalis	NA	NA	NA	NA	12.0475	NA	12.807	NA	NA	NA	NA	11.4291	13.3794	12.1867	12.2743	9.29336	10.633	NA	12.5582	11.2162	NA	10.3661	12.4266	NA
ADFVACHNPAYVR	Clostridiales	Order	Bacteria		Firmicutes	Clostridia	Clostridiales				NA	NA	NA	NA	13.5404	12.1461	14.2833	13.8113	12.801	NA	12.8836	12.2339	14.2504	13.5778	11.0169	11.8133	NA	12.1617	13.9971	12.786	12.4545	NA	12.9409	13.3581
ADFVACHNPSYITK	Bacteria	Superkingdom	Bacteria								NA	NA	NA	NA	NA	NA	NA	12.5915	NA	NA	NA	11.4479	13.9413	NA	NA	NA	NA	NA	NA	NA	NA	NA	NA	NA
ADFVACHNPSYVNK	Clostridiales	Order	Bacteria		Firmicutes	Clostridia	Clostridiales				NA	NA	NA	NA	11.8965	12.299	14.3201	12.7206	12.1108	NA	NA	12.3718	13.8318	11.2941	10.5489	NA	NA	12.9383	12.9573	11.3837	12.4644	NA	NA	13.0592
ADFVACHNPSYVTK	Bacteria	Superkingdom	Bacteria								13.6622	12.9505	12.7144	12.7306	15.4371	14.3274	15.0409	NA	14.1237	NA	14.3966	12.1059	16.5424	15.8295	13.2535	13.6811	13.8567	13.3006	15.1227	13.481	13.2473	12.1304	16.9387	13.9001
ADFVACHNPSYVVK	Anaerotruncus sp. G3(2012)	Species	Bacteria		Firmicutes	Clostridia	Clostridiales	Ruminococcaceae	Anaerotruncus	Anaerotruncus sp. G3(2012)	NA	NA	NA	NA	NA	NA	NA	13.3623	NA	NA	NA	11.5992	11.4284	NA	NA	NA	NA	NA	NA	NA	NA	NA	9.7492	NA
ADFVACHVPAYIVK	Clostridiales	Order	Bacteria		Firmicutes	Clostridia	Clostridiales				NA	NA	NA	NA	NA	NA	NA	NA	NA	NA	NA	NA	11.6648	11.5458	NA	NA	NA	NA	NA	NA	NA	NA	11.6231	12.6199
ADFYSFTR	Roseburia	Genus	Bacteria		Firmicutes	Clostridia	Clostridiales	Lachnospiraceae	Roseburia		NA	NA	NA	NA	NA	NA	NA	NA	NA	NA	NA	NA	NA	NA	13.1714	NA	NA	NA	NA	NA	NA	NA	NA	NA
ADGELNVDSLITR	Mustela putorius	Species	Eukaryota	Metazoa	Chordata	Mammalia	Carnivora	Mustelidae	Mustela	Mustela putorius	12.7572	14.6658	13.956	14.7905	13.0781	13.5915	11.2155	12.6596	13.5286	12.1322	13.1336	13.0259	13.112	13.0339	13.4923	12.9387	12.1338	12.6691	12.9724	12.7972	12.0224	11.2063	13.4081	13.2376
ADGFEWGFMAVPAVNAGEK	Lachnospiraceae bacterium A2	Species	Bacteria		Firmicutes	Clostridia	Clostridiales	Lachnospiraceae		Lachnospiraceae bacterium A2	NA	NA	13.0482	NA	12.6693	12.6895	13.839	13.8023	NA	NA	NA	NA	11.6466	12.6219	10.9666	14.8951	NA	12.6967	11.0604	12.0476	15.6879	NA	12.3156	NA
ADGHVTSVGDEGGFAPNLK	Desulfovibrio	Genus	Bacteria		Proteobacteria	Deltaproteobacteria	Desulfovibrionales	Desulfovibrionaceae	Desulfovibrio		NA	NA	NA	NA	NA	NA	NA	13.4511	NA	NA	NA	NA	NA	NA	NA	NA	NA	NA	NA	NA	NA	NA	NA	NA
ADGIQVLYGNLAPDGALVK	Hungatella hathewayi	Species	Bacteria		Firmicutes	Clostridia	Clostridiales	Clostridiaceae	Hungatella	Hungatella hathewayi	11.8531	11.1547	10.4529	10.8513	13.2761	11.8697	13.6493	12.765	12.8049	NA	NA	12.5976	11.9241	12.926	12.9755	12.5309	12.7136	12.9097	13.4597	NA	11.4947	10.9131	13.3288	12.2978
ADGISSTDAVK	Hungatella hathewayi	Species	Bacteria		Firmicutes	Clostridia	Clostridiales	Clostridiaceae	Hungatella	Hungatella hathewayi	NA	NA	NA	NA	NA	NA	NA	NA	NA	NA	NA	NA	NA	NA	13.993	NA	13.3681	NA	NA	NA	13.239	NA	NA	NA
ADGLAILGVLMK	Mus musculus	Species	Eukaryota	Metazoa	Chordata	Mammalia	Rodentia	Muridae	Mus	Mus musculus	12.8279	15.7495	13.7609	15.1993	14.1687	15.537	11.8221	13.9144	15.4565	11.5025	12.9695	13.7637	13.7934	14.0366	13.8284	12.6261	13.16	14.6456	15.5646	13.3295	12.2107	13.2237	15.2714	16.3713
ADGLYPVADDR	Muridae	Family	Eukaryota	Metazoa	Chordata	Mammalia	Rodentia	Muridae			NA	13.9281	13.9261	NA	13.2743	NA	13.9281	16.031	13.7504	16.2561	NA	15.9125	12.504	13.3371	NA	14.0751	14.797	NA	NA	NA	14.6453	15.0404	13.635	NA
ADGQPMNVNVAISNNVNK	Lachnospiraceae bacterium MD335	Species	Bacteria		Firmicutes	Clostridia	Clostridiales	Lachnospiraceae		Lachnospiraceae bacterium MD335	NA	NA	NA	NA	10.3475	NA	NA	NA	NA	NA	NA	NA	10.9662	10.9639	NA	10.7203	NA	NA	NA	NA	10.5339	9.62303	9.15685	NA
ADGSTQVIDTK	Mammalia	Class	Eukaryota	Metazoa	Chordata	Mammalia					15.1836	16.9142	16.7072	16.9186	14.9282	15.9206	13.1094	15.3063	15.2891	14.9344	15.0367	15.3057	14.4218	14.8573	14.7177	15.8383	15.0815	16.5062	14.5177	15.2047	14.3231	15.9929	14.401	15.3435
ADGTAFTDEEK	Lachnospiraceae bacterium MD335	Species	Bacteria		Firmicutes	Clostridia	Clostridiales	Lachnospiraceae		Lachnospiraceae bacterium MD335	NA	NA	12.0922	NA	NA	NA	NA	NA	NA	NA	NA	NA	NA	12.0869	NA	12.6038	12.4578	NA	NA	NA	12.1459	11.0936	12.0922	NA
ADGTAFTDEEKK	Lachnospiraceae bacterium MD335	Species	Bacteria		Firmicutes	Clostridia	Clostridiales	Lachnospiraceae		Lachnospiraceae bacterium MD335	NA	NA	12.2711	NA	12.0708	10.3149	NA	NA	11.806	NA	NA	NA	10.7126	NA	NA	11.9978	12.2063	NA	12.042	NA	13.1675	11.5586	11.4159	11.554
ADGTEMKDYK	Lachnospiraceae bacterium A4	Species	Bacteria		Firmicutes	Clostridia	Clostridiales	Lachnospiraceae		Lachnospiraceae bacterium A4	NA	NA	NA	NA	10.795	11.3454	10.7438	10.9636	10.8797	10.8857	9.93717	NA	10.6367	11.1463	NA	NA	10.8742	10.1301	NA	NA	9.8051	10.9509	NA	NA
ADGTIQSIIDK	Firmicutes	Phylum	Bacteria		Firmicutes						NA	NA	NA	NA	NA	NA	NA	NA	NA	NA	NA	NA	11.2569	NA	8.41645	NA	NA	NA	NA	NA	NA	NA	NA	NA
ADGVLVGMDGR	Rodentia	Order	Eukaryota	Metazoa	Chordata	Mammalia	Rodentia				11.4818	12.8952	NA	11.8449	NA	12.7906	NA	NA	NA	12.412	NA	NA	NA	NA	NA	NA	NA	12.3784	NA	NA	NA	NA	NA	12.2274
ADGVNVVEVSDVTPWQEAVK	Lachnospiraceae bacterium MD335	Species	Bacteria		Firmicutes	Clostridia	Clostridiales	Lachnospiraceae		Lachnospiraceae bacterium MD335	11.2605	NA	11.8564	NA	12.772	10.8894	11.5567	11.1947	12.3923	11.9391	12.4272	12.7455	12.5208	12.9661	11.3241	12.75	12.9132	11.8932	12.9464	12.642	12.6389	11.2906	11.9087	11.6522
ADGYEKEDHSSIVK	Clostridiales	Order	Bacteria		Firmicutes	Clostridia	Clostridiales				NA	NA	NA	NA	NA	NA	NA	12.2846	NA	NA	NA	11.9587	12.5043	NA	NA	NA	NA	NA	NA	NA	NA	NA	12.1275	NA
ADGYEPPVQESV	Metazoa	Kingdom	Eukaryota	Metazoa							NA	11.4321	11.0643	NA	NA	NA	NA	NA	NA	NA	NA	NA	NA	NA	NA	NA	NA	NA	NA	NA	NA	NA	NA	NA
ADGYVLEGK	Eukaryota	Superkingdom	Eukaryota								NA	13.6883	13.3242	13.4301	NA	NA	NA	NA	NA	NA	NA	NA	NA	NA	11.996	NA	NA	NA	13.1295	NA	NA	NA	NA	NA
ADHITVTAK	Lachnospiraceae bacterium MD335	Species	Bacteria		Firmicutes	Clostridia	Clostridiales	Lachnospiraceae		Lachnospiraceae bacterium MD335	11.1534	NA	11.7045	NA	NA	10.6137	11.4441	NA	NA	11.747	12.5685	NA	NA	NA	NA	NA	13.0135	11.9287	12.9986	12.7769	NA	11.5462	NA	NA
ADIAESQVNK	Metazoa	Kingdom	Eukaryota	Metazoa							13.3797	15.0308	15.2278	14.0793	NA	13.8112	NA	NA	NA	14.0239	14.1179	NA	NA	13.3649	NA	12.5063	13.5959	13.9631	13.2095	NA	NA	13.6759	NA	NA
ADIDIQQIVR	Lachnospiraceae bacterium A2	Species	Bacteria		Firmicutes	Clostridia	Clostridiales	Lachnospiraceae		Lachnospiraceae bacterium A2	NA	NA	11.9727	NA	13.0091	12.7126	13.9079	12.9048	NA	NA	NA	NA	NA	13.4735	10.6395	14.232	NA	11.9364	NA	11.9882	13.7699	NA	11.9528	NA
ADIDKLNIDSIIQR	Mustela putorius	Species	Eukaryota	Metazoa	Chordata	Mammalia	Carnivora	Mustelidae	Mustela	Mustela putorius	8.75595	NA	NA	10.4946	NA	10.9445	NA	NA	NA	NA	NA	NA	NA	NA	NA	NA	NA	NA	NA	NA	NA	NA	NA	9.97321
ADIDKNLTLFLYPDDSDEAGQQLR	Lachnospiraceae bacterium A4	Species	Bacteria		Firmicutes	Clostridia	Clostridiales	Lachnospiraceae		Lachnospiraceae bacterium A4	NA	NA	NA	NA	NA	NA	NA	NA	NA	NA	NA	NA	NA	9.91746	10.2063	NA	NA	NA	NA	NA	NA	NA	NA	NA
ADIDPENR	Clostridiales	Order	Bacteria		Firmicutes	Clostridia	Clostridiales				NA	NA	NA	NA	14.2383	NA	NA	NA	NA	NA	NA	NA	NA	15.6785	13.8494	14.3422	13.7231	NA	NA	NA	NA	NA	NA	NA
ADIDPFEEIMDK	Prevotella	Genus	Bacteria		Bacteroidetes	Bacteroidia	Bacteroidales	Prevotellaceae	Prevotella		NA	NA	NA	NA	NA	NA	NA	NA	NA	NA	11.7973	NA	NA	NA	NA	NA	NA	NA	NA	NA	NA	NA	NA	NA
ADIDYALVEALTK	Bacteroidales	Order	Bacteria		Bacteroidetes	Bacteroidia	Bacteroidales				14.3587	14.5227	14.6676	14.5069	12.7871	12.5383	11.024	12.9	12.2875	NA	13.6193	11.2606	12.7871	12.9481	13.2942	12.3782	12.4264	11.0546	13.8757	12.7871	12.6737	NA	12.8147	14.4912
ADIDYGFAEADTTYGK	Bacteria	Superkingdom	Bacteria								17.5667	16.1214	16.5467	16.1608	18.1797	18.0196	18.4535	18.0338	17.7251	16.3666	17.4633	17.6648	18.1112	18.4564	18.278	17.4671	17.6007	17.4989	17.9308	17.8939	17.5289	16.6904	17.819	17.9997
ADIDYGFAEANTTYGK	Firmicutes	Phylum	Bacteria		Firmicutes						13.0877	15.043	14.2307	14.8042	15.0935	15.209	14.3051	14.2142	14.3132	13.7568	13.7274	13.4076	14.0206	14.8158	15.0212	14.3511	13.2944	13.5654	14.4071	13.0323	13.4135	13.3002	14.6548	14.1194
ADIDYGVAR	Bacteria	Superkingdom	Bacteria								NA	NA	NA	14.8721	NA	14.5264	NA	13.0104	NA	NA	14.6703	NA	NA	NA	15.6445	NA	NA	12.5721	15.3553	NA	NA	NA	NA	NA
ADIELFVNR	Mammalia	Class	Eukaryota	Metazoa	Chordata	Mammalia					NA	12.99	13.044	13.388	NA	13.8256	NA	11.5261	13.0048	NA	NA	12.0102	13.2009	NA	12.276	NA	11.6122	12.1752	11.5427	NA	10.707	NA	12.5127	12.5581
ADIEMPFDPSK	Mammalia	Class	Eukaryota	Metazoa	Chordata	Mammalia					13.0359	15.7181	15.0428	14.6953	12.1573	14.1907	NA	12.9747	12.4687	11.4425	12.446	12.3387	12.8777	12.5577	13.3934	13.1255	12.5041	14.1038	12.9265	13.5344	NA	12.674	13.4617	12.9793
ADIEQALSLPQDAPVAAPETK	Lactobacillus murinus	Species	Bacteria		Firmicutes	Bacilli	Lactobacillales	Lactobacillaceae	Lactobacillus	Lactobacillus murinus	11.4255	11.2302	10.8298	9.94862	NA	NA	NA	11.0252	10.2831	8.58667	10.6413	11.791	9.50492	NA	NA	10.0863	9.61686	NA	9.29063	11.0563	8.82983	9.74085	9.28438	10.0436
ADIEVEDASAAEGYTFK	Anaerotruncus sp. G3(2012)	Species	Bacteria		Firmicutes	Clostridia	Clostridiales	Ruminococcaceae	Anaerotruncus	Anaerotruncus sp. G3(2012)	NA	NA	NA	9.42237	NA	NA	NA	NA	NA	NA	NA	NA	NA	NA	9.90251	9.71349	NA	NA	NA	NA	8.73508	NA	10.7444	10.6219
ADIEYGFAEAATTYGR	Firmicutes	Phylum	Bacteria		Firmicutes						NA	NA	NA	NA	NA	13.4441	NA	13.032	NA	NA	NA	NA	NA	NA	11.6753	NA	NA	NA	NA	NA	NA	NA	11.5883	NA
ADIEYGFAEADTTYGK	Firmicutes	Phylum	Bacteria		Firmicutes						NA	NA	NA	NA	11.5458	NA	NA	10.9754	12.2495	NA	NA	12.1724	13.8059	NA	NA	NA	NA	NA	NA	NA	13.0256	NA	11.6397	NA
ADIFAAGDK	Bacteria	Superkingdom	Bacteria								14.4389	13.9826	15.274	14.0595	15.8803	15.3642	15.3392	15.3215	15.3468	14.2001	15.1469	15.4663	15.7167	15.7444	15.6887	15.6578	15.9138	15.8676	15.5108	15.9066	15.4605	15.2566	15.4604	15.2796
ADIFAAGDKIDASAISK	Clostridiales	Order	Bacteria		Firmicutes	Clostridia	Clostridiales				12.5472	11.81	11.7105	12.3148	13.7206	14.5659	13.3297	13.5426	NA	12.1919	13.6581	NA	14.7627	13.9365	13.746	13.7643	13.3436	14.408	14.7497	13.3827	NA	13.7975	14.0703	NA
ADIFAAGDKVDATAISK	Clostridiales	Order	Bacteria		Firmicutes	Clostridia	Clostridiales				NA	NA	NA	NA	13.1095	15.2541	NA	15.0389	13.7583	NA	NA	13.5121	14.4764	NA	NA	13.8723	NA	NA	NA	13.6867	13.4088	NA	NA	15.8948
ADIFAAGDR	Clostridiales	Order	Bacteria		Firmicutes	Clostridia	Clostridiales				NA	13.3751	NA	13.0823	14.1852	13.7001	14.3262	12.6922	13.5164	NA	13.1566	12.7155	12.3829	14.1206	14.7804	13.9596	NA	13.2774	NA	12.8481	NA	13.4343	12.7346	14.2284
ADIFAAGDRVDATAISK	Lachnospiraceae bacterium M18-1	Species	Bacteria		Firmicutes	Clostridia	Clostridiales	Lachnospiraceae		Lachnospiraceae bacterium M18-1	NA	NA	NA	NA	NA	14.0159	NA	15.1285	NA	NA	NA	11.7624	11.9654	NA	NA	NA	NA	NA	NA	NA	NA	NA	12.3144	NA
ADIFAEGDKIDATAISK	Clostridiales	Order	Bacteria		Firmicutes	Clostridia	Clostridiales				NA	NA	NA	NA	NA	14.2554	NA	14.7982	NA	NA	NA	13.3861	13.9583	NA	NA	NA	NA	NA	NA	NA	NA	NA	13.9772	NA
ADIFEAGDK	Clostridiales	Order	Bacteria		Firmicutes	Clostridia	Clostridiales				NA	12.2281	13.109	NA	13.8369	NA	NA	13.3403	13.5453	NA	13.272	13.4607	12.9817	13.9618	13.6785	12.4617	14.0335	NA	12.7824	13.3726	13.521	11.5749	13.0738	NA
ADIFEAGDKIDVTAK	Clostridium	Genus	Bacteria		Firmicutes	Clostridia	Clostridiales	Clostridiaceae	Clostridium		NA	NA	NA	NA	11.6363	12.1184	NA	NA	NA	NA	NA	NA	NA	NA	12.635	NA	NA	NA	NA	NA	NA	NA	NA	NA
ADIGAAGMTVTEDR	Clostridiales	Order	Bacteria		Firmicutes	Clostridia	Clostridiales				13.0951	NA	13.0018	10.9557	11.8821	12.2845	12.9189	13.0945	12.6373	11.4367	12.6542	13.2845	12.2407	12.1724	12.5821	10.4311	12.7519	13.214	13.0332	12.9523	13.6435	11.7136	13.0404	13.616
ADIGAAGMTVTEDRK	Clostridium sp. MD294	Species	Bacteria		Firmicutes	Clostridia	Clostridiales	Clostridiaceae	Clostridium	Clostridium sp. MD294	NA	NA	NA	NA	NA	NA	NA	NA	NA	NA	NA	9.38162	NA	NA	NA	NA	NA	8.67755	8.85494	8.82324	NA	NA	NA	8.35373
ADIGCTPGSGK	Mammalia	Class	Eukaryota	Metazoa	Chordata	Mammalia					13.6456	14.3403	13.5445	14.6913	13.6394	14.0318	12.2486	NA	NA	13.2082	13.4209	NA	NA	13.8033	NA	13.4376	12.8992	13.182	13.1022	13.509	NA	13.1976	NA	13.1862
ADIGVAGMTVTEDR	Lachnospiraceae bacterium MD308	Species	Bacteria		Firmicutes	Clostridia	Clostridiales	Lachnospiraceae		Lachnospiraceae bacterium MD308	NA	12.0785	NA	NA	11.8274	13.779	13.5284	11.2406	11.5977	13.7666	12.752	NA	13.5666	12.434	12.9952	13.06	12.4681	NA	NA	NA	11.9071	NA	11.362	11.9898
ADIGVAMGIVGSDVSK	Rodentia	Order	Eukaryota	Metazoa	Chordata	Mammalia	Rodentia				NA	12.8681	12.687	13.196	NA	13.6041	NA	NA	NA	NA	NA	NA	12.5265	NA	NA	NA	NA	11.8486	12.8051	NA	NA	NA	13.1023	13.2627
ADIIMILINDEK	Clostridiales	Order	Bacteria		Firmicutes	Clostridia	Clostridiales				NA	NA	NA	NA	NA	NA	NA	11.4079	NA	NA	NA	10.1906	11.1198	NA	9.95755	10.5777	10.9377	NA	NA	NA	NA	11.3722	NA	NA
ADIKAPEDK	Metazoa	Kingdom	Eukaryota	Metazoa							13.7941	12.2494	12.1206	11.8315	NA	13.701	10.6952	NA	NA	11.2469	13.4402	NA	NA	NA	NA	NA	11.4158	13.4274	11.9943	12.8698	NA	NA	NA	13.4348
ADIKAPEDKK	Metazoa	Kingdom	Eukaryota	Metazoa							10.027	10.0548	NA	10.1323	NA	10.5389	NA	NA	NA	NA	9.83764	NA	NA	NA	NA	NA	NA	NA	NA	NA	NA	NA	8.94065	9.91057
ADILAMVK	Clostridiales	Order	Bacteria		Firmicutes	Clostridia	Clostridiales				NA	NA	10.0866	NA	11.1511	NA	12.8432	12.7996	12.5699	NA	12.4132	11.4962	10.1831	11.5302	12.3181	10.9776	12.351	11.5378	11.8894	NA	11.5997	NA	10.8694	NA
ADILYAINSSVVTK	Alistipes sp. CHKCI003	Species	Bacteria		Bacteroidetes	Bacteroidia	Bacteroidales	Rikenellaceae	Alistipes	Alistipes sp. CHKCI003	NA	12.1227	12.138	12.5303	11.8841	11.7738	NA	NA	NA	NA	10.2132	NA	13.6059	12.5497	12.6752	NA	NA	NA	12.7501	NA	NA	NA	11.0156	12.1227
ADILYECPVEGNITR	Fusicatenibacter	Genus	Bacteria		Firmicutes	Clostridia	Clostridiales	Lachnospiraceae	Fusicatenibacter		12.3797	13.0321	12.2685	13.0724	12.5259	13.2109	NA	12.6311	13.7037	NA	12.5674	NA	11.8037	12.6098	10.7314	12.6234	14.3102	12.9426	14.3465	12.3377	NA	12.1358	13.9688	NA
ADINTIR	Bacteria	Superkingdom	Bacteria								14.4237	16.3092	15.9847	15.3267	15.4615	16.095	12.7775	16.0026	16.5237	14.9392	15.3726	12.8954	14.39	15.334	14.4472	15.7146	17.4841	16.2072	16.5117	14.3272	NA	15.5105	NA	NA
ADIPENIK	Bacteria	Superkingdom	Bacteria								NA	13.6914	14.199	13.6675	NA	NA	NA	NA	NA	NA	NA	NA	NA	NA	13.1595	NA	NA	NA	NA	NA	NA	NA	13.1805	13.7364
ADITIVCK	Clostridiales	Order	Bacteria		Firmicutes	Clostridia	Clostridiales				NA	NA	NA	NA	12.5556	NA	NA	12.6739	NA	NA	NA	NA	NA	12.5866	NA	NA	12.9653	NA	NA	NA	NA	NA	NA	NA
ADITVITK	Lachnospiraceae bacterium A2	Species	Bacteria		Firmicutes	Clostridia	Clostridiales	Lachnospiraceae		Lachnospiraceae bacterium A2	NA	NA	NA	NA	16.4097	20.6394	19.9822	17.7453	NA	NA	NA	NA	NA	16.4964	NA	NA	NA	NA	13.9873	NA	NA	NA	15.0327	15.4358
ADITVITKK	Lachnospiraceae bacterium A2	Species	Bacteria		Firmicutes	Clostridia	Clostridiales	Lachnospiraceae		Lachnospiraceae bacterium A2	NA	NA	NA	NA	13.8982	18.9365	18.5428	15.2948	NA	NA	NA	NA	NA	13.8694	NA	NA	NA	NA	12.6504	NA	NA	NA	12.8179	13.3911
ADITVWGR	Clostridiales	Order	Bacteria		Firmicutes	Clostridia	Clostridiales				NA	NA	NA	NA	NA	NA	NA	NA	NA	NA	NA	NA	NA	NA	NA	NA	NA	NA	15.4285	NA	NA	NA	NA	NA
ADIVENQVMDTR	Rodentia	Order	Eukaryota	Metazoa	Chordata	Mammalia	Rodentia				13.5361	16.0009	15.2073	15.4383	13.2577	14.6328	NA	NA	NA	NA	12.9813	NA	14.0018	13.4384	13.4627	12.8227	13.4103	13.6387	13.7944	13.3217	NA	12.2243	13.5308	13.9668
ADIVLQVDEPGCGIVIPPQAK	Clostridiales	Order	Bacteria		Firmicutes	Clostridia	Clostridiales				NA	NA	NA	NA	NA	NA	NA	NA	10.0553	NA	NA	NA	NA	NA	NA	NA	NA	NA	NA	NA	NA	NA	11.7579	NA
ADIWLIR	Chordata	Phylum	Eukaryota	Metazoa	Chordata						12.3044	13.6982	13.4091	14.193	NA	13.8403	NA	13.2589	13.7525	13.0515	13.0202	14.0786	NA	11.9816	12.6351	12.5412	12.7326	14.16	12.2978	12.5683	NA	13.0592	13.7806	13.3926
ADIYYDDLGK	Clostridiales	Order	Bacteria		Firmicutes	Clostridia	Clostridiales				NA	13.0701	13.0472	13.2485	13.4419	NA	NA	13.4323	12.9761	NA	NA	12.8642	13.6256	13.5262	13.6612	NA	12.8786	NA	NA	NA	12.1381	NA	13.9477	NA
ADIYYDDLGKDMR	Clostridiales	Order	Bacteria		Firmicutes	Clostridia	Clostridiales				10.525	NA	NA	NA	9.79612	11.8271	NA	NA	NA	NA	10.4293	NA	10.8905	NA	10.5169	NA	NA	10.8353	12.3088	9.79963	NA	NA	10.5955	11.9754
ADKDYHFK	Metazoa	Kingdom	Eukaryota	Metazoa							NA	NA	NA	NA	NA	NA	NA	NA	NA	NA	NA	12.4657	NA	NA	NA	NA	NA	NA	NA	NA	NA	NA	11.4653	NA
ADKFNEVK	Lachnospiraceae bacterium MD335	Species	Bacteria		Firmicutes	Clostridia	Clostridiales	Lachnospiraceae		Lachnospiraceae bacterium MD335	NA	NA	NA	NA	12.6033	NA	NA	NA	NA	NA	NA	NA	NA	12.7714	13.2841	NA	13.381	NA	NA	NA	NA	NA	NA	NA
ADKGAVNPDVVGK	Anaerotruncus sp. G3(2012)	Species	Bacteria		Firmicutes	Clostridia	Clostridiales	Ruminococcaceae	Anaerotruncus	Anaerotruncus sp. G3(2012)	NA	9.3427	NA	9.60573	10.3944	NA	9.68508	NA	NA	NA	NA	NA	NA	10.2217	NA	8.81679	NA	NA	10.6676	9.84679	NA	10.0566	NA	11.0428
ADKGVTQDVDLTAEDLK	Clostridiales	Order	Bacteria		Firmicutes	Clostridia	Clostridiales				NA	NA	NA	NA	11.9389	NA	11.3912	NA	NA	NA	NA	NA	10.7496	11.2927	10.1926	NA	10.8427	NA	NA	NA	NA	NA	11.4584	10.2962
ADKLAEEHGS	Metazoa	Kingdom	Eukaryota	Metazoa							NA	NA	NA	NA	11.6667	NA	NA	NA	NA	NA	NA	NA	NA	11.7148	13.2809	NA	NA	NA	NA	NA	12.0361	NA	NA	NA
ADLAAVEAK	Chordata	Phylum	Eukaryota	Metazoa	Chordata						NA	13.0272	NA	NA	NA	NA	NA	NA	NA	NA	NA	NA	NA	NA	NA	NA	NA	NA	NA	NA	NA	NA	NA	NA
ADLEGAALQK	Lachnospiraceae bacterium MD335	Species	Bacteria		Firmicutes	Clostridia	Clostridiales	Lachnospiraceae		Lachnospiraceae bacterium MD335	13.7149	NA	14.5289	12.6022	14.0657	12.8848	13.5424	13.1801	15.0359	14.7256	14.8426	15.0672	NA	14.1104	NA	NA	15.4892	14.2247	15.0037	14.8897	14.4733	14.4468	NA	NA
ADLEGGDNSEN	Bacteria	Superkingdom	Bacteria								10.4906	10.771	11.4703	NA	NA	NA	NA	NA	11.8444	NA	NA	NA	11.6762	NA	12.1004	NA	NA	NA	NA	11.3301	NA	11.1899	NA	NA
ADLEGMCGK	Mus musculus	Species	Eukaryota	Metazoa	Chordata	Mammalia	Rodentia	Muridae	Mus	Mus musculus	NA	NA	NA	11.6604	NA	NA	NA	NA	11.1996	NA	NA	NA	NA	NA	NA	NA	NA	NA	11.6073	NA	NA	NA	12.1742	NA
ADLEMQIENLR	Mammalia	Class	Eukaryota	Metazoa	Chordata	Mammalia					NA	NA	NA	NA	NA	NA	NA	NA	10.7824	NA	NA	NA	NA	NA	NA	NA	11.9436	NA	10.7602	NA	NA	NA	NA	NA
ADLFEAGDIVDVTGTSK	Lactobacillus	Genus	Bacteria		Firmicutes	Bacilli	Lactobacillales	Lactobacillaceae	Lactobacillus		NA	12.3947	13.0382	NA	NA	NA	NA	13.0378	11.8959	11.2012	NA	13.042	11.3972	NA	NA	NA	NA	NA	NA	NA	11.287	NA	10.3986	NA
ADLGALELWR	Mammalia	Class	Eukaryota	Metazoa	Chordata	Mammalia					NA	11.1629	10.5702	10.6724	NA	10.6136	NA	NA	10.0717	NA	10.629	NA	NA	NA	NA	NA	NA	NA	NA	NA	NA	NA	NA	NA
ADLGAVQNR	Bacteria	Superkingdom	Bacteria								NA	NA	15.0778	NA	16.781	16.3457	NA	NA	NA	NA	16.4373	NA	NA	17.2611	17.1802	15.9563	NA	NA	NA	NA	NA	NA	NA	NA
ADLGNENLEALEK	Oxobacter pfennigii	Species	Bacteria		Firmicutes	Clostridia	Clostridiales	Clostridiaceae	Oxobacter	Oxobacter pfennigii	11.8677	11.4661	NA	10.7711	12.4502	12.1753	12.2541	12.2999	12.0896	9.81673	12.1711	11.4799	13.866	12.2999	12.8539	12.0238	9.96528	11.1078	12.435	12.2782	11.3081	11.8277	13.3532	13.8811
ADLIAYLKK	Eukaryota	Superkingdom	Eukaryota								13.5204	NA	NA	NA	NA	12.6858	10.4788	NA	11.9193	11.5031	10.6436	NA	11.5344	11.0942	NA	12.3278	NA	12.971	10.7863	12.8006	13.0607	12.9394	12.9067	12.3447
ADLINNLGTIAK	Eukaryota	Superkingdom	Eukaryota								13.6953	NA	13.7121	15.6892	NA	14.9444	NA	13.7367	13.7754	13.0149	NA	NA	13.4927	NA	13.8648	13.2724	13.9616	14.2771	12.7639	13.2539	13.2023	12.6839	NA	13.9344
ADLKDVDDSDLGLK	Clostridiales	Order	Bacteria		Firmicutes	Clostridia	Clostridiales				NA	NA	12.8269	NA	13.0567	13.8968	14.0074	13.7629	NA	NA	NA	NA	13.6201	13.1026	13.5013	14.4087	11.2765	12.7832	13.107	11.581	13.2838	NA	14.0404	14.2031
ADLKDVDDSNLGLAGSPTK	Clostridium	Genus	Bacteria		Firmicutes	Clostridia	Clostridiales	Clostridiaceae	Clostridium		10.3136	10.2907	10.1802	NA	11.9849	10.2481	10.1085	11.4989	13.862	10.3604	12.0331	12.2064	11.8926	12.4108	14.236	9.92474	11.7947	NA	NA	10.6187	NA	NA	12.0772	10.1984
ADLKDVDDSNLGLK	Clostridiales	Order	Bacteria		Firmicutes	Clostridia	Clostridiales				11.6189	12.2668	10.943	12.0462	13.9201	10.9623	11.6678	12.3983	12.367	NA	13.7913	13.3581	14.1225	13.9819	13.7761	13.2392	11.9486	11.0039	14.3892	13.3861	12.447	11.0324	12.8809	10.6035
ADLKDVEDSNLGLK	Roseburia	Genus	Bacteria		Firmicutes	Clostridia	Clostridiales	Lachnospiraceae	Roseburia		NA	NA	NA	NA	NA	14.9633	NA	13.2807	NA	NA	NA	15.5047	15.7663	NA	NA	NA	NA	NA	NA	NA	14.0654	NA	16.037	14.11
ADLLEFDCQLTR	Muridae	Family	Eukaryota	Metazoa	Chordata	Mammalia	Rodentia	Muridae			NA	NA	NA	NA	NA	NA	NA	NA	NA	NA	NA	NA	NA	NA	NA	NA	NA	NA	NA	NA	NA	NA	12.4104	NA
ADLLLEPCSHYR	Mammalia	Class	Eukaryota	Metazoa	Chordata	Mammalia					NA	NA	NA	NA	NA	11.5768	NA	NA	NA	NA	NA	NA	NA	NA	NA	NA	NA	NA	11.2783	NA	NA	NA	NA	10.8658
ADLNNENLDALEK	Clostridium scatologenes	Species	Bacteria		Firmicutes	Clostridia	Clostridiales	Clostridiaceae	Clostridium	Clostridium scatologenes	13.0955	11.3021	11.7266	12.1743	14.2446	12.3172	15.4209	13.3472	12.9929	NA	13.7347	12.5799	14.5887	NA	14.9492	13.6619	13.25	14.454	14.3386	13.4497	12.6225	11.7725	14.0149	12.9797
ADLNNENLEALEK	Clostridiales	Order	Bacteria		Firmicutes	Clostridia	Clostridiales				11.1059	13.1014	13.6913	13.6861	14.4045	13.8743	15.0599	13.5221	14.6442	NA	15.1166	NA	15.4392	14.6	15.6267	13.6582	13.7537	12.7356	14.9088	14.1682	13.002	12.6189	14.4802	14.5043
ADLNQGIGEPQSPSR	Mammalia	Class	Eukaryota	Metazoa	Chordata	Mammalia					NA	11.1374	NA	NA	NA	NA	NA	NA	NA	NA	NA	NA	NA	NA	NA	NA	NA	NA	NA	NA	NA	NA	NA	NA
ADLNSDIKEK	Mus musculus	Species	Eukaryota	Metazoa	Chordata	Mammalia	Rodentia	Muridae	Mus	Mus musculus	NA	NA	NA	NA	NA	NA	NA	NA	10.5011	NA	NA	NA	NA	NA	NA	NA	NA	NA	NA	NA	11.0534	NA	NA	12.5353
ADLPFLMPVEDVFTITGR	Clostridiales	Order	Bacteria		Firmicutes	Clostridia	Clostridiales				NA	NA	NA	8.60295	NA	10.4597	NA	9.69328	NA	NA	NA	NA	10.4842	9.65715	10.1411	NA	NA	NA	NA	NA	NA	NA	NA	11.4179
ADLSGMSGSR	Rodentia	Order	Eukaryota	Metazoa	Chordata	Mammalia	Rodentia				16.5681	18.9447	18.3729	19.3383	17.3648	17.9385	15.0339	16.689	17.8942	16.5355	17.1079	17.4037	17.6759	17.3097	17.425	17.495	17.1942	17.345	16.9493	16.9486	16.3842	16.4065	15.6692	18.039
ADLTGISK	Metazoa	Kingdom	Eukaryota	Metazoa							14.1406	15.805	15.2415	15.0363	14.0115	14.0115	13.3805	NA	14.0115	14.607	14.111	NA	12.8294	13.9821	13.8488	14.7297	14.8864	14.6173	13.8366	13.9408	15.3927	13.8899	13.3613	13.5782
ADLTVNLGR	Lachnospiraceae bacterium 28-4	Species	Bacteria		Firmicutes	Clostridia	Clostridiales	Lachnospiraceae		Lachnospiraceae bacterium 28-4	NA	13.9631	15.1727	NA	12.2284	15.0238	NA	14.8905	14.4904	14.5118	12.5213	NA	NA	12.6081	NA	NA	15.6229	14.0161	13.9227	NA	NA	NA	NA	NA
ADLYLEGK	Chordata	Phylum	Eukaryota	Metazoa	Chordata						NA	12.9264	12.4248	12.5443	NA	12.7854	NA	NA	12.5686	NA	11.1935	12.0364	NA	NA	12.7658	NA	12.4444	12.9051	NA	NA	NA	NA	NA	NA
ADLYTVESK	Mus musculus	Species	Eukaryota	Metazoa	Chordata	Mammalia	Rodentia	Muridae	Mus	Mus musculus	NA	NA	12.235	12.4318	NA	12.2979	NA	NA	NA	NA	NA	NA	NA	NA	NA	NA	NA	12.3334	NA	NA	NA	NA	NA	NA
ADMEICVR	Lachnospiraceae bacterium A4	Species	Bacteria		Firmicutes	Clostridia	Clostridiales	Lachnospiraceae		Lachnospiraceae bacterium A4	NA	NA	NA	NA	NA	NA	13.1831	NA	NA	NA	NA	13.8023	NA	NA	NA	NA	NA	NA	NA	12.9283	NA	NA	NA	NA
ADMETLQR	Chordata	Phylum	Eukaryota	Metazoa	Chordata						12.6511	13.0003	NA	13.1522	NA	NA	NA	NA	NA	NA	NA	NA	NA	NA	NA	NA	NA	NA	NA	NA	NA	NA	NA	13.154
ADMGGAATICSAIVSAAK	Mammalia	Class	Eukaryota	Metazoa	Chordata	Mammalia					15.6032	16.5281	14.4277	16.5793	14.4178	14.0959	13.2727	NA	14.7845	15.4259	13.7588	14.2062	14.0134	14.3934	12.514	13.2997	15.206	13.3299	14.2581	14.8044	14.1152	15.7122	16.164	13.8769
ADMPFLMPVEDVFTISGR	Firmicutes	Phylum	Bacteria		Firmicutes						10.0937	NA	11.4928	9.62454	13.7001	13.6597	12.0584	11.4767	13.2586	NA	NA	NA	15.801	14.0113	14.1792	10.9782	11.9651	12.6032	14.5229	NA	12.1845	NA	14.5781	13.7178
ADMPVAVETVK	Anaerotruncus sp. G3(2012)	Species	Bacteria		Firmicutes	Clostridia	Clostridiales	Ruminococcaceae	Anaerotruncus	Anaerotruncus sp. G3(2012)	13.9052	14.0789	12.3366	14.1422	14.2383	12.1476	14.1008	15.1729	14.3059	13.337	12.2853	13.1326	13.3971	14.466	14.4761	13.5882	13.2398	14.0051	14.8899	14.0629	14.0317	14.1075	14.893	15.3113
ADMQDNTVK	Bacteria	Superkingdom	Bacteria								NA	12.7446	NA	12.31	NA	13.3399	14.2139	NA	NA	NA	12.4849	NA	NA	NA	NA	13.5341	13.446	NA	14.2917	12.4458	NA	11.419	NA	NA
ADMQIEADGSR	Acetitomaculum ruminis	Species	Bacteria		Firmicutes	Clostridia	Clostridiales	Lachnospiraceae	Acetitomaculum	Acetitomaculum ruminis	NA	11.5704	NA	NA	11.6097	11.8734	NA	NA	12.4008	NA	NA	NA	NA	11.824	NA	NA	11.8015	NA	12.0054	NA	NA	NA	NA	NA
ADMTQAVLEGVAFALR	Bacteria	Superkingdom	Bacteria								NA	NA	NA	NA	10.4502	11.1134	NA	10.0203	NA	NA	NA	NA	11.2473	10.9764	10.4973	NA	10.019	NA	11.569	NA	8.41403	NA	10.1779	10.7286
ADMVIEAVFEDLGVK	Mus musculus	Species	Eukaryota	Metazoa	Chordata	Mammalia	Rodentia	Muridae	Mus	Mus musculus	NA	NA	NA	10.9042	NA	9.92306	NA	NA	NA	NA	NA	NA	NA	NA	NA	NA	NA	NA	NA	NA	NA	NA	NA	9.56916
ADMYFILK	Clostridiales	Order	Bacteria		Firmicutes	Clostridia	Clostridiales				NA	NA	NA	NA	11.625	11.4204	11.8326	12.3049	11.2344	NA	NA	11.0088	12.1905	11.3798	12.4938	NA	11.3894	11.1869	NA	NA	10.1877	10.7774	10.8217	11.7327
ADNFEYSDPVDGSISK	Muridae	Family	Eukaryota	Metazoa	Chordata	Mammalia	Rodentia	Muridae			10.3968	12.3667	10.4656	10.8982	NA	11.0627	NA	NA	NA	8.9439	NA	NA	10.3464	NA	NA	NA	NA	10.9675	10.721	NA	NA	NA	9.8412	10.708
ADNLIPGTR	Metazoa	Kingdom	Eukaryota	Metazoa							14.3821	14.6705	13.9866	15.2367	NA	14.899	13.5889	14.528	14.653	NA	14.4009	14.2906	13.9627	NA	NA	13.6242	NA	14.2596	14.2269	14.65	15.2921	14.4199	14.6997	14.0275
ADNMMMLK	Lachnospiraceae bacterium A4	Species	Bacteria		Firmicutes	Clostridia	Clostridiales	Lachnospiraceae		Lachnospiraceae bacterium A4	12.2906	10.8934	NA	NA	NA	NA	12.068	NA	NA	NA	NA	12.8363	NA	NA	11.9488	NA	NA	NA	NA	11.534	NA	NA	NA	NA
ADNSATGFGTGTR	Mus musculus	Species	Eukaryota	Metazoa	Chordata	Mammalia	Rodentia	Muridae	Mus	Mus musculus	17.7853	18.7675	18.1757	19.4574	18.6593	18.7661	16.6913	18.4771	18.3405	18.2523	18.2874	17.8027	20.6314	18.636	18.7458	18.0491	18.1647	18.3666	19.0511	18.729	18.0087	17.0914	20.1009	18.3897
ADPFANYAEMRPGNASR	Lachnospiraceae bacterium MD335	Species	Bacteria		Firmicutes	Clostridia	Clostridiales	Lachnospiraceae		Lachnospiraceae bacterium MD335	NA	NA	NA	NA	NA	NA	NA	NA	NA	NA	NA	NA	11.9092	NA	10.8917	NA	NA	NA	NA	NA	NA	NA	11.4465	NA
ADPGIPPPPR	Mammalia	Class	Eukaryota	Metazoa	Chordata	Mammalia					11.9719	14.6094	13.7506	14.1	NA	14.0206	NA	NA	NA	NA	12.4763	NA	13.2733	NA	NA	NA	NA	12.4484	13.6787	12.7138	NA	11.0568	12.8784	13.9289
ADPMSIVR	Alistipes	Genus	Bacteria		Bacteroidetes	Bacteroidia	Bacteroidales	Rikenellaceae	Alistipes		NA	14.5804	14.8076	16.2813	14.0866	15.0098	13.4962	14.8147	14.2273	14.1174	14.5095	13.6275	12.976	14.0681	13.3494	12.9406	14.0755	13.5872	14.2009	13.4034	12.7098	12.1985	13.9998	13.6365
ADPPYTHTIQK	Mammalia	Class	Eukaryota	Metazoa	Chordata	Mammalia					11.7969	NA	13.3124	14.273	12.0465	14.0899	NA	NA	NA	NA	NA	NA	13.124	11.8564	11.9949	NA	NA	NA	12.9174	NA	NA	NA	12.8659	13.3354
ADPSLNPEQLK	Mammalia	Class	Eukaryota	Metazoa	Chordata	Mammalia					NA	12.4259	12.1616	11.9895	NA	12.6573	NA	NA	11.3184	NA	NA	11.628	NA	NA	11.1454	NA	NA	12.0658	11.6696	11.9118	NA	NA	11.7192	12.2961
ADPSLNPEQLKK	Mammalia	Class	Eukaryota	Metazoa	Chordata	Mammalia					11.1381	10.897	NA	11.4472	NA	11.4921	NA	NA	10.2475	NA	NA	NA	11.0841	NA	NA	NA	NA	NA	NA	NA	NA	NA	NA	11.7374
ADPSQFELLK	Metazoa	Kingdom	Eukaryota	Metazoa							NA	13.6908	13.294	13.1121	NA	NA	NA	NA	NA	NA	NA	NA	NA	NA	NA	NA	NA	NA	NA	NA	NA	NA	NA	NA
ADPSQPPSELGYTWNIPVR	Mus musculus	Species	Eukaryota	Metazoa	Chordata	Mammalia	Rodentia	Muridae	Mus	Mus musculus	13.7466	15.4944	14.5789	16.649	15.3699	16.3682	13.5252	15.785	15.6431	14.8516	15.0005	15.4515	17.4786	15.9127	15.6417	15.5692	15.8633	14.774	15.7923	15.3624	15.4338	15.5914	16.4104	15.8056
ADPVLLEPIMK	Bacteria	Superkingdom	Bacteria								13.0862	NA	NA	NA	NA	NA	NA	12.4528	NA	NA	NA	NA	11.5573	NA	12.8555	NA	11.3107	14.0332	13.1956	NA	NA	NA	13.0412	14.1259
ADPYANYAEMRPGTASR	Lachnospiraceae bacterium A4	Species	Bacteria		Firmicutes	Clostridia	Clostridiales	Lachnospiraceae		Lachnospiraceae bacterium A4	NA	NA	NA	NA	13.7196	13.0138	14.3703	NA	11.5275	NA	NA	NA	13.1124	13.1628	13.22	11.8034	NA	11.4201	11.4052	NA	NA	NA	12.8273	10.8132
ADPYVEITGTAGK	Mus musculus	Species	Eukaryota	Metazoa	Chordata	Mammalia	Rodentia	Muridae	Mus	Mus musculus	NA	12.5185	NA	12.3706	NA	12.5185	NA	NA	NA	NA	NA	NA	NA	NA	NA	NA	NA	NA	NA	NA	NA	NA	NA	NA
ADQDKMDVALQK	Lactobacillaceae	Family	Bacteria		Firmicutes	Bacilli	Lactobacillales	Lactobacillaceae			NA	NA	NA	NA	NA	NA	NA	NA	NA	NA	NA	9.85413	NA	NA	NA	NA	NA	NA	NA	9.1116	NA	NA	NA	NA
ADQEDMAQYSVTQAIVEAR	Mus musculus	Species	Eukaryota	Metazoa	Chordata	Mammalia	Rodentia	Muridae	Mus	Mus musculus	16.2577	18.2555	18.2548	17.9512	16.1695	16.941	16.069	17.0122	16.1504	16.6963	16.1317	15.9545	15.754	16.2314	15.3963	16.2361	17.8204	16.4599	15.8926	15.881	17.2737	17.4068	16.7941	15.106
ADQGIKPNTIR	Roseburia	Genus	Bacteria		Firmicutes	Clostridia	Clostridiales	Lachnospiraceae	Roseburia		11.7336	NA	10.6241	NA	NA	NA	11.9912	NA	NA	NA	NA	NA	NA	11.546	12.6329	11.6998	NA	11.4534	NA	NA	NA	NA	11.7839	NA
ADQIETQQLMR	Chordata	Phylum	Eukaryota	Metazoa	Chordata						12.667	13.2406	NA	13.4567	NA	13.5159	NA	NA	NA	12.6626	12.8402	12.2718	13.4444	NA	12.5887	NA	NA	13.1733	12.6888	12.578	12.2287	11.2364	13.7412	13.6738
ADQLTEEQIAEFK	Metazoa	Kingdom	Eukaryota	Metazoa							15.2663	16.4205	15.9712	16.3591	15.0505	NA	13.7661	14.2387	15.5316	16.1313	14.9166	15.0847	15.1757	15.1858	15.6477	15.5319	15.0058	16.6759	14.4979	15.6562	NA	15.4624	15.4972	14.4542
ADQPALDFGK	Lachnospiraceae	Family	Bacteria		Firmicutes	Clostridia	Clostridiales	Lachnospiraceae			15.8233	NA	14.5533	13.1875	16.3452	14.4501	16.4928	NA	14.613	13.5788	15.3304	15.1814	15.1197	16.4181	16.3895	15.1121	15.1272	14.8689	15.4022	16.0077	NA	14.9588	15.1744	13.3211
ADQPFLMPVEDVFTISGR	Ruminococcaceae	Family	Bacteria		Firmicutes	Clostridia	Clostridiales	Ruminococcaceae			NA	10.4937	NA	11.2492	13.1688	12.6603	11.4893	10.6668	NA	NA	11.1382	NA	13.1269	13.3969	13.7579	10.4806	NA	NA	NA	NA	NA	NA	12.939	14.0672
ADQQAGAASLR	Lachnospiraceae bacterium A4	Species	Bacteria		Firmicutes	Clostridia	Clostridiales	Lachnospiraceae		Lachnospiraceae bacterium A4	16.5309	12.5192	14.1479	12.5207	16.4035	14.9601	17.214	NA	NA	13.5969	16.4986	NA	NA	16.6021	16.8305	14.256	13.7672	14.2331	16.1523	16.4893	NA	13.9881	NA	12.1628
ADQVDDPELLELVEMDIR	Ruminococcus albus	Species	Bacteria		Firmicutes	Clostridia	Clostridiales	Ruminococcaceae	Ruminococcus	Ruminococcus albus	NA	NA	NA	NA	11.872	NA	NA	NA	NA	NA	NA	NA	11.6557	12.099	10.6496	NA	NA	NA	NA	NA	NA	NA	NA	NA
ADQVDTQQLMR	Eukaryota	Superkingdom	Eukaryota								11.9926	13.1937	12.1999	12.8514	NA	12.7318	NA	NA	11.5263	NA	NA	11.192	12.4758	NA	NA	NA	NA	12.3254	12.1997	11.6961	11.502	NA	12.4489	12.5124
ADQWNVNYVETSAK	Chordata	Phylum	Eukaryota	Metazoa	Chordata						NA	NA	12.1381	12.9586	NA	12.8633	NA	11.6178	NA	NA	NA	NA	11.8552	NA	NA	NA	NA	11.5001	11.2222	11.4509	10.7537	NA	12.4965	NA
ADRDDYVIIVWDR	Mus musculus	Species	Eukaryota	Metazoa	Chordata	Mammalia	Rodentia	Muridae	Mus	Mus musculus	NA	NA	NA	NA	NA	NA	NA	13.722	NA	NA	NA	NA	NA	NA	NA	NA	NA	NA	NA	NA	NA	NA	NA	NA
ADRDQYELLCLDNTR	Mammalia	Class	Eukaryota	Metazoa	Chordata	Mammalia					11.2057	14.2372	13.1646	15.0358	11.5091	13.0475	NA	NA	11.4252	NA	NA	NA	NA	11.6849	NA	11.7675	11.6604	10.9709	NA	10.6118	11.1652	11.7115	NA	12.6471
ADRFVEEYDR	Mus musculus	Species	Eukaryota	Metazoa	Chordata	Mammalia	Rodentia	Muridae	Mus	Mus musculus	NA	NA	NA	NA	NA	11.8671	NA	NA	11.8071	NA	NA	9.91539	12.5776	NA	NA	NA	NA	NA	NA	NA	12.2891	NA	12.5725	NA
ADSAVQCVQFLK	Clostridiales	Order	Bacteria		Firmicutes	Clostridia	Clostridiales				NA	NA	NA	NA	11.9607	NA	NA	NA	NA	NA	NA	10.1477	NA	11.7362	NA	NA	11.3262	NA	NA	11.0942	NA	NA	11.7468	NA
ADSAVQCVQFLKEDEQPIIK	Lachnospiraceae	Family	Bacteria		Firmicutes	Clostridia	Clostridiales	Lachnospiraceae			NA	NA	NA	NA	10.7696	NA	9.83065	NA	NA	NA	NA	NA	NA	NA	NA	NA	NA	NA	10.3827	NA	NA	NA	NA	NA
ADSGIDLAALK	Clostridiales	Order	Bacteria		Firmicutes	Clostridia	Clostridiales				13.3716	NA	11.6626	NA	13.0943	12.0328	13.438	11.5513	13.4065	12.6439	13.9877	14.3775	13.3454	13.0942	14.231	NA	13.3792	13.4333	13.52	13.9434	NA	12.7968	12.5894	NA
ADSGIELSALK	Clostridiales	Order	Bacteria		Firmicutes	Clostridia	Clostridiales				NA	NA	14.0784	13.9397	15.5633	15.5688	16.6031	15.5668	12.5014	NA	13.4036	NA	15.3988	15.594	15.419	15.6196	15.5046	13.8995	14.4165	15.0971	15.9563	13.1775	16.2746	15.1837
ADSLADEINFLR	Chordata	Phylum	Eukaryota	Metazoa	Chordata						11.6475	11.9093	NA	NA	NA	12.1728	11.7466	10.6166	13.2948	NA	13.1097	NA	NA	NA	NA	NA	14.4228	11.0008	14.2757	NA	12.3113	NA	NA	11.9673
ADSLQDEINFLK	Muridae	Family	Eukaryota	Metazoa	Chordata	Mammalia	Rodentia	Muridae			12.1321	13.1895	13.0657	12.6387	NA	12.6922	NA	NA	NA	NA	NA	NA	NA	NA	NA	NA	NA	NA	12.9515	NA	NA	NA	NA	NA
ADSLTDDINFLR	Mus musculus	Species	Eukaryota	Metazoa	Chordata	Mammalia	Rodentia	Muridae	Mus	Mus musculus	12.433	12.8012	11.7939	NA	NA	13.1058	NA	11.659	13.0668	11.9915	13.0991	NA	11.0646	NA	NA	NA	14.054	11.8388	13.7048	12.3507	12.875	NA	11.4729	12.7311
ADSNWFR	Clostridium sp. MD294	Species	Bacteria		Firmicutes	Clostridia	Clostridiales	Clostridiaceae	Clostridium	Clostridium sp. MD294	NA	NA	NA	NA	NA	NA	NA	NA	NA	NA	NA	NA	NA	NA	NA	NA	11.023	11.83	13.1846	NA	NA	NA	NA	NA
ADSQLAEMGGTESTGK	Lachnospiraceae bacterium A2	Species	Bacteria		Firmicutes	Clostridia	Clostridiales	Lachnospiraceae		Lachnospiraceae bacterium A2	NA	NA	NA	NA	12.3518	12.6817	12.2562	12.9309	NA	NA	NA	NA	NA	12.469	NA	NA	NA	NA	NA	NA	NA	NA	10.6446	NA
ADSTFSTTIR	Lachnospiraceae bacterium MD335	Species	Bacteria		Firmicutes	Clostridia	Clostridiales	Lachnospiraceae		Lachnospiraceae bacterium MD335	15.0482	NA	14.773	NA	17.4291	14.2347	14.7248	13.2871	15.4801	13.5156	16.265	14.7356	17.8987	17.3858	16.9672	17.0814	16.1478	14.2126	17.9024	16.2487	15.43	14.4759	17.2069	16.6294
ADSVAWAR	Rodentia	Order	Eukaryota	Metazoa	Chordata	Mammalia	Rodentia				15.6133	16.729	16.5664	17.0843	15.2338	15.3018	13.2694	15.6935	15.5521	15.7226	14.5959	15.7581	14.6292	15.0919	14.774	15.6334	15.2652	15.3181	14.6081	15.6551	15.5696	15.7311	15.4258	14.4004
ADTAWNAVLLR	Rodentia	Order	Eukaryota	Metazoa	Chordata	Mammalia	Rodentia				12.7317	13.1062	12.1156	12.5211	NA	13.2709	NA	NA	NA	NA	NA	NA	NA	NA	10.5018	NA	NA	11.7745	13.0093	11.3363	11.103	NA	NA	11.8957
ADTDDAPVPAPAGDQK	Rodentia	Order	Eukaryota	Metazoa	Chordata	Mammalia	Rodentia				NA	11.5382	11.5157	10.9127	NA	12.2661	NA	NA	NA	NA	NA	NA	NA	NA	NA	NA	NA	9.62593	10.7327	NA	NA	NA	NA	11.2485
ADTENGVLLIK	Lactobacillus	Genus	Bacteria		Firmicutes	Bacilli	Lactobacillales	Lactobacillaceae	Lactobacillus		13.7622	13.2123	NA	12.4159	NA	11.4688	11.0087	12.6138	12.2616	12.4875	12.8419	13.1425	10.6383	NA	NA	11.6882	12.1195	11.3591	11.0686	13.281	11.2567	11.6978	10.0677	11.4113
ADTLDPALLRPGR	Eukaryota	Superkingdom	Eukaryota								NA	NA	NA	NA	11.3486	12.8933	NA	12.247	11.1445	NA	NA	10.2276	11.5502	11.4159	12.1434	11.6112	NA	NA	10.2366	10.3762	11.4781	NA	10.5236	11.3798
ADTPSLGEGPEK	Mammalia	Class	Eukaryota	Metazoa	Chordata	Mammalia					NA	NA	12.3259	12.3181	NA	12.5457	NA	NA	NA	NA	NA	NA	NA	NA	NA	NA	NA	NA	11.5097	NA	NA	NA	NA	NA
ADTQTYQPYNK	Metazoa	Kingdom	Eukaryota	Metazoa							NA	11.3721	NA	NA	NA	NA	NA	NA	NA	NA	NA	NA	NA	NA	NA	NA	NA	NA	NA	NA	NA	NA	NA	NA
ADTTTLTFDPETK	Anaerotruncus sp. G3(2012)	Species	Bacteria		Firmicutes	Clostridia	Clostridiales	Ruminococcaceae	Anaerotruncus	Anaerotruncus sp. G3(2012)	NA	11.3587	10.0269	12.038	12.5848	NA	11.3165	12.6855	NA	NA	NA	NA	11.7793	12.3154	13.3109	11.8071	11.608	12.0284	12.7242	11.677	NA	12.0766	13.6962	14.3433
ADTVSAGEDSITVDGK	Clostridiales	Order	Bacteria		Firmicutes	Clostridia	Clostridiales				NA	NA	NA	11.5626	NA	NA	14.8474	NA	14.3498	NA	14.4752	NA	17.0889	NA	NA	NA	NA	NA	17.7378	14.9651	NA	NA	11.8563	NA
ADTVSAGEDSITVDGKEIK	Clostridiales	Order	Bacteria		Firmicutes	Clostridia	Clostridiales				NA	NA	NA	NA	NA	NA	NA	NA	NA	NA	NA	NA	NA	NA	NA	NA	NA	NA	12.7955	NA	NA	NA	NA	NA
ADTVSASDDSITVDGK	Clostridium	Genus	Bacteria		Firmicutes	Clostridia	Clostridiales	Clostridiaceae	Clostridium		NA	NA	NA	NA	13.8485	NA	NA	NA	NA	12.0401	15.981	12.8896	12.186	14.0253	15.6004	11.9634	NA	NA	14.6473	13.6487	NA	NA	NA	NA
ADTVSASDDSITVDGKEIK	Clostridium	Genus	Bacteria		Firmicutes	Clostridia	Clostridiales	Clostridiaceae	Clostridium		NA	NA	NA	NA	NA	NA	NA	NA	NA	NA	10.7362	NA	NA	NA	NA	NA	NA	NA	NA	NA	NA	NA	NA	NA
ADTVTAGEDSITVDGK	Lachnospiraceae bacterium 28-4	Species	Bacteria		Firmicutes	Clostridia	Clostridiales	Lachnospiraceae		Lachnospiraceae bacterium 28-4	14.1822	15.1773	16.2995	12.6329	17.8471	17.4972	17.7976	16.0337	16.7734	15.1421	15.2563	NA	16.2346	NA	15.4853	12.7175	18.0139	16.0709	17.5119	14.5416	14.6533	15.4261	17.9499	14.2643
ADTVVAGEDSITVDGK	Clostridiales	Order	Bacteria		Firmicutes	Clostridia	Clostridiales				14.795	14.3019	11.1468	14.5183	NA	NA	NA	NA	NA	NA	NA	11.7402	NA	NA	14.3548	14.8468	NA	15.6072	NA	13.4483	NA	NA	14.6826	14.1342
ADTYELQVR	Metazoa	Kingdom	Eukaryota	Metazoa							NA	NA	NA	NA	NA	NA	NA	NA	NA	NA	12.515	NA	NA	NA	13.6933	NA	NA	13.9987	NA	NA	NA	NA	13.4315	NA
ADTYFILK	Bacteria	Superkingdom	Bacteria								12.0578	11.6611	11.7066	11.2343	13.7688	13.4484	13.8068	13.2201	14.0158	11.9327	13.2153	13.6015	13.8175	14.1483	13.937	12.922	13.3392	14.1556	14.5795	13.7729	12.8958	12.4372	13.9177	12.9557
ADTYVIFAMTDK	Anaerotruncus sp. G3(2012)	Species	Bacteria		Firmicutes	Clostridia	Clostridiales	Ruminococcaceae	Anaerotruncus	Anaerotruncus sp. G3(2012)	NA	11.6155	NA	11.8135	12.0096	11.2731	12.1046	13.6622	11.6172	11.3087	NA	NA	11.4326	12.1352	11.8394	11.949	11.9106	12.4879	11.8115	NA	NA	12.5634	13.0247	13.1536
ADTYVVFAVTTPDIGTR	Bacteria	Superkingdom	Bacteria								NA	NA	NA	NA	12.2044	13.6289	11.9935	12.812	10.8883	NA	NA	NA	11.9454	12.4207	11.869	11.2266	11.6744	NA	11.813	NA	11.4195	NA	11.9685	13.4705
ADVDYCLTEALTK	Alistipes sp. CHKCI003	Species	Bacteria		Bacteroidetes	Bacteroidia	Bacteroidales	Rikenellaceae	Alistipes	Alistipes sp. CHKCI003	10.6169	11.838	10.8814	12.607	11.846	11.0795	NA	NA	11.431	NA	12.3356	NA	13.4649	11.8116	NA	NA	10.6	NA	12.4267	10.0569	NA	NA	11.8028	11.9563
ADVENLAGGDGSGR	Clostridiales	Order	Bacteria		Firmicutes	Clostridia	Clostridiales				14.6672	14.5881	13.4192	13.7418	15.7527	14.7082	15.8292	14.9331	15.1018	13.8164	15.9109	14.7392	16.4642	15.797	16.4613	15.5353	15.0632	15.139	16.5091	15.7837	15.1694	15.4949	15.8947	15.4883
ADVESQFPDWIR	Mus musculus	Species	Eukaryota	Metazoa	Chordata	Mammalia	Rodentia	Muridae	Mus	Mus musculus	NA	10.5218	NA	NA	NA	NA	NA	NA	NA	NA	NA	NA	NA	NA	NA	NA	NA	NA	NA	NA	NA	NA	NA	NA
ADVFAAGDK	Firmicutes	Phylum	Bacteria		Firmicutes						NA	NA	12.9984	NA	12.4364	NA	NA	12.6435	NA	NA	NA	NA	NA	12.4179	13.1592	NA	13.6905	12.5417	NA	NA	NA	NA	11.8087	NA
ADVFVENIAPGSADR	Bacteria	Superkingdom	Bacteria								11.828	12.3942	NA	11.6963	NA	NA	NA	12.049	NA	NA	12.7951	12.1662	11.8233	NA	NA	NA	NA	NA	11.8559	11.7843	11.6697	NA	NA	NA
ADVGFAMGSGTEAAK	Bacteria	Superkingdom	Bacteria								14.3101	11.8811	12.99	13.2634	14.6462	13.4224	14.85	13.3545	13.3328	11.7085	14.5493	14.1744	15.5074	14.8261	14.9236	13.417	13.5727	13.2271	14.8357	14.3514	13.1754	13.432	14.4319	13.9061
ADVILALGCR	Betaproteobacteria bacterium SG8_41	Species	Bacteria		Proteobacteria	Betaproteobacteria				Betaproteobacteria bacterium SG8_41	13.5493	NA	11.4421	NA	14.4427	14.1489	14.6394	13.3401	13.7127	NA	13.7946	NA	14.3093	14.3579	12.279	11.8244	NA	NA	NA	NA	12.9837	11.7369	13.057	NA
ADVIVTGK	Lachnospiraceae bacterium MD335	Species	Bacteria		Firmicutes	Clostridia	Clostridiales	Lachnospiraceae		Lachnospiraceae bacterium MD335	NA	NA	NA	NA	NA	NA	NA	NA	NA	NA	NA	NA	NA	NA	NA	12.664	NA	NA	NA	NA	NA	NA	NA	NA
ADVLFVAPR	Rodentia	Order	Eukaryota	Metazoa	Chordata	Mammalia	Rodentia				11.3923	11.3713	11.636	11.4134	10.6393	NA	NA	NA	11.5786	11.7698	10.4251	11.4637	11.9074	NA	NA	NA	11.3552	11.6023	NA	11.1965	11.1672	NA	12.0868	NA
ADVLIEEQIAK	Bacteroides	Genus	Bacteria		Bacteroidetes	Bacteroidia	Bacteroidales	Bacteroidaceae	Bacteroides		NA	13.7399	13.5444	13.2451	12.354	NA	NA	NA	NA	NA	12.4494	NA	13.4505	NA	12.6595	NA	12.0312	NA	13.2041	NA	12.9433	NA	12.771	13.3143
ADVTLATIPVPIEEASR	Clostridiales	Order	Bacteria		Firmicutes	Clostridia	Clostridiales				NA	NA	NA	NA	NA	NA	13.1768	12.7909	13.6256	NA	NA	NA	12.0769	NA	14.1628	12.9151	12.428	11.7196	NA	NA	13.4525	NA	12.0233	NA
ADVVESWIGEK	Metazoa	Kingdom	Eukaryota	Metazoa							NA	12.4218	11.9717	11.9653	NA	12.2644	NA	NA	NA	NA	NA	NA	NA	10.5936	10.7191	NA	NA	11.1407	NA	NA	NA	NA	NA	11.9895
ADVYEAVR	Dorea	Genus	Bacteria		Firmicutes	Clostridia	Clostridiales	Lachnospiraceae	Dorea		15.8842	14.7074	15.464	14.5918	15.3179	15.0176	15.6972	16.054	14.9286	14.5036	15.0718	15.1525	14.8411	15.3267	15.7381	15.5659	14.9277	14.9786	15.2507	15.6751	14.6761	15.2126	14.4663	13.6492
ADWSSLSR	Rodentia	Order	Eukaryota	Metazoa	Chordata	Mammalia	Rodentia				15.0256	16.5548	15.2689	16.1718	13.5565	16.1051	12.6398	NA	14.7401	13.3812	14.1709	15.0855	11.4318	13.4308	14.1116	14.3074	13.6022	15.261	14.0925	13.8569	NA	14.2291	14.8509	15.3284
ADWSSLSRDEK	Rodentia	Order	Eukaryota	Metazoa	Chordata	Mammalia	Rodentia				11.2287	NA	NA	NA	NA	12.0351	NA	NA	NA	NA	NA	NA	NA	NA	NA	NA	NA	10.9446	10.7567	11.2675	NA	NA	NA	12.388
ADYAIVVADGNK	Anaerotruncus sp. G3(2012)	Species	Bacteria		Firmicutes	Clostridia	Clostridiales	Ruminococcaceae	Anaerotruncus	Anaerotruncus sp. G3(2012)	NA	NA	NA	NA	NA	NA	NA	NA	NA	NA	NA	NA	NA	11.7777	12.9033	10.9261	12.0483	NA	NA	NA	NA	NA	11.5178	12.0813
ADYEYFR	Bacteria	Superkingdom	Bacteria								NA	NA	NA	NA	12.2205	13.8292	13.3164	NA	12.5895	NA	NA	NA	12.8399	NA	12.985	NA	11.9112	12.883	NA	NA	NA	13.7192	13.0393	NA
ADYLALVFER	Mus musculus	Species	Eukaryota	Metazoa	Chordata	Mammalia	Rodentia	Muridae	Mus	Mus musculus	NA	NA	12.5612	12.3262	11.6616	11.0564	NA	11.8533	11.4574	NA	11.3803	11.7702	11.5488	11.0405	10.9362	NA	10.7384	NA	11.4574	NA	10.8995	NA	12.3824	11.5706
ADYPAEIR	Clostridiales	Order	Bacteria		Firmicutes	Clostridia	Clostridiales				13.2896	13.9887	13.4062	NA	NA	15.8509	14.7518	14.9403	14.566	NA	13.7646	13.5968	14.9836	NA	14.7472	13.1883	15.6884	14.4893	15.0108	13.5661	14.8853	14.0548	14.1356	NA
ADYPEGDGNWANYNTFGSAEAATSDDYK	Mammalia	Class	Eukaryota	Metazoa	Chordata	Mammalia					NA	11.1237	12.064	10.3937	9.59532	10.3331	NA	10.491	10.2933	NA	NA	10.7537	10.9209	NA	NA	NA	NA	9.6144	NA	NA	10.7155	NA	12.1306	NA
ADYQVACGGELR	Mus musculus	Species	Eukaryota	Metazoa	Chordata	Mammalia	Rodentia	Muridae	Mus	Mus musculus	15.9323	17.2736	17.115	16.7721	15.5238	15.6108	14.6398	15.5213	15.8421	15.7831	15.9191	15.085	15.4764	15.606	12.7585	15.8927	16.1837	14.9746	16.1011	15.5549	15.6766	15.6805	16.3183	15.4049
ADYTASYK	Lachnospiraceae bacterium MD335	Species	Bacteria		Firmicutes	Clostridia	Clostridiales	Lachnospiraceae		Lachnospiraceae bacterium MD335	NA	NA	12.9497	NA	NA	NA	NA	NA	NA	12.032	13.3022	NA	NA	NA	NA	14.2973	13.3821	12.7503	13.3278	12.8301	NA	11.8603	NA	NA
ADYTDYSSIDK	Oscillibacter sp. 1-3	Species	Bacteria		Firmicutes	Clostridia	Clostridiales	Oscillospiraceae	Oscillibacter	Oscillibacter sp. 1-3	NA	10.4457	12.7796	NA	12.6817	NA	13.2302	12.109	12.5594	NA	11.8135	NA	13.4056	12.911	13.3763	10.9324	11.8205	NA	13.8333	NA	NA	NA	13.0632	12.9877
ADYTDYSSIDKAPEEK	Oscillibacter sp. 1-3	Species	Bacteria		Firmicutes	Clostridia	Clostridiales	Oscillospiraceae	Oscillibacter	Oscillibacter sp. 1-3	NA	11.2199	10.1301	NA	11.3021	12.9279	NA	12.7002	NA	NA	NA	NA	11.2283	11.7556	10.7066	NA	NA	NA	13.0929	NA	NA	NA	NA	NA
AEAAPEAVAAETVSAVK	Lachnospiraceae bacterium MD335	Species	Bacteria		Firmicutes	Clostridia	Clostridiales	Lachnospiraceae		Lachnospiraceae bacterium MD335	NA	NA	11.116	NA	11.6942	NA	NA	NA	NA	NA	NA	NA	NA	11.6398	12.8946	NA	NA	NA	13.088	NA	NA	NA	11.7058	11.7591
AEAAQMLMQYFSNK	Hungateiclostridiaceae bacterium KB18	Species	Bacteria		Firmicutes	Clostridia	Clostridiales	Hungateiclostridiaceae		Hungateiclostridiaceae bacterium KB18	11.5214	NA	NA	NA	11.3038	NA	NA	NA	NA	NA	12.3661	NA	11.5477	10.556	12.6048	13.0376	NA	NA	NA	NA	NA	NA	NA	NA
AEACVFWR	Chordata	Phylum	Eukaryota	Metazoa	Chordata						18.5478	19.1085	19.1899	19.8118	19.2798	19.1832	18.569	18.8525	18.6077	18.7337	18.6189	18.1774	18.7175	19.3662	15.8907	18.7223	20.1496	18.5403	18.6442	18.4394	18.6217	19.7903	18.8633	19.0687
AEAEALTDKADGTAFTDEEK	Lachnospiraceae bacterium MD335	Species	Bacteria		Firmicutes	Clostridia	Clostridiales	Lachnospiraceae		Lachnospiraceae bacterium MD335	NA	NA	NA	NA	10.1767	NA	NA	NA	NA	NA	NA	10.1063	10.5205	10.0587	NA	NA	NA	NA	10.5485	9.35457	NA	9.5114	10.5888	NA
AEAEALTDKADGTAFTDEEKK	Lachnospiraceae bacterium MD335	Species	Bacteria		Firmicutes	Clostridia	Clostridiales	Lachnospiraceae		Lachnospiraceae bacterium MD335	NA	NA	NA	NA	NA	12.6831	NA	12.1117	NA	NA	NA	12.024	13.0929	NA	NA	NA	NA	NA	NA	NA	12.9153	NA	13.103	NA
AEAEALYQTK	Mammalia	Class	Eukaryota	Metazoa	Chordata	Mammalia					NA	NA	NA	NA	NA	NA	NA	11.7446	NA	12.2846	11.695	12.8238	NA	NA	NA	12.1278	11.9564	NA	NA	NA	NA	11.0868	NA	NA
AEAEAQAEELSFPR	Mammalia	Class	Eukaryota	Metazoa	Chordata	Mammalia					11.6586	13.1337	12.5277	12.2536	NA	13.2936	NA	NA	NA	10.4108	11.119	10.9195	NA	NA	10.9631	10.884	11.1599	12.7351	11.6762	11.9233	NA	NA	12.225	11.7625
AEAEAWYQTK	Chordata	Phylum	Eukaryota	Metazoa	Chordata						11.6652	13.4423	12.781	11.6384	NA	13.0273	NA	NA	NA	NA	NA	NA	NA	NA	NA	NA	NA	NA	12.3913	NA	NA	NA	NA	NA
AEAELCSEAEETR	Mammalia	Class	Eukaryota	Metazoa	Chordata	Mammalia					10.6038	11.9368	11.2459	11.7731	NA	12.3797	NA	NA	NA	NA	NA	NA	NA	NA	NA	NA	NA	NA	10.6579	NA	NA	NA	NA	11.1723
AEAESWYQTK	Chordata	Phylum	Eukaryota	Metazoa	Chordata						NA	12.6134	NA	NA	NA	NA	NA	NA	NA	NA	15.205	13.6758	NA	NA	NA	13.2964	NA	NA	12.0964	NA	12.3682	NA	13.9784	NA
AEAESWYR	Metazoa	Kingdom	Eukaryota	Metazoa							14.1092	14.728	15.0674	14.2773	14.1283	14.671	13.3323	NA	13.918	14.8765	14.4685	14.1182	13.5687	14.1215	13.4598	13.8232	15.3726	14.9554	13.9885	14.2834	14.9563	14.9964	13.2568	14.0574
AEAETLPSLPITK	Mus musculus	Species	Eukaryota	Metazoa	Chordata	Mammalia	Rodentia	Muridae	Mus	Mus musculus	13.5141	15.6337	14.7131	16.0497	13.7743	14.1747	NA	13.1936	13.3915	12.0909	12.8907	12.9667	14.2208	13.6278	13.8206	13.5635	12.2694	13.3109	13.7852	13.3156	11.8433	12.2503	13.9963	14.766
AEAETMYQIK	Chordata	Phylum	Eukaryota	Metazoa	Chordata						15.6173	17.2357	17.1884	16.2664	10.6688	16.0403	NA	NA	NA	11.8565	11.8055	NA	NA	11.4491	12.3386	NA	12.8225	14.4223	15.375	13.3175	NA	11.1494	13.1765	13.5282
AEAFFLCPPGK	Clostridiales	Order	Bacteria		Firmicutes	Clostridia	Clostridiales				NA	NA	NA	NA	12.0574	11.9813	12.4046	NA	12.2398	NA	12.3598	NA	12.2156	12.2883	NA	NA	12.1199	11.1909	12.3554	NA	12.4838	NA	12.2108	11.6207
AEAFTGNLEGLNK	Hungateiclostridiaceae bacterium KB18	Species	Bacteria		Firmicutes	Clostridia	Clostridiales	Hungateiclostridiaceae		Hungateiclostridiaceae bacterium KB18	NA	NA	NA	NA	16.124	NA	NA	NA	NA	NA	15.5655	NA	16.7384	16.1854	17.6569	15.7695	NA	NA	NA	NA	10.8872	15.1565	NA	NA
AEAGAGSATEFQFR	Metazoa	Kingdom	Eukaryota	Metazoa							NA	11.1073	NA	NA	NA	NA	NA	NA	NA	NA	NA	NA	NA	NA	NA	NA	NA	NA	NA	NA	NA	NA	NA	NA
AEAGDNLGALVR	Chordata	Phylum	Eukaryota	Metazoa	Chordata						13.5657	15.4594	14.7855	14.7969	11.9301	14.8183	11.65	NA	12.3674	12.4794	12.6116	13.0996	12.5247	12.1	13.1296	12.4382	11.7557	13.3581	13.4031	12.2749	11.7313	NA	13.3804	13.0212
AEAGEGQKPSPAQLELR	Muridae	Family	Eukaryota	Metazoa	Chordata	Mammalia	Rodentia	Muridae			NA	NA	NA	NA	NA	12.9344	NA	12.7117	11.9922	NA	NA	12.1997	12.3865	12.2714	12.1792	NA	NA	12.8556	11.315	NA	NA	NA	12.2509	12.5231
AEAHIAAGAK	Bacteria	Superkingdom	Bacteria								NA	12.9606	NA	NA	NA	NA	NA	NA	NA	NA	NA	NA	NA	12.332	NA	NA	12.1457	NA	NA	NA	NA	NA	NA	NA
AEAIISIAHPDFR	Clostridiales	Order	Bacteria		Firmicutes	Clostridia	Clostridiales				NA	NA	NA	NA	NA	NA	NA	11.538	NA	NA	NA	10.4861	10.9391	NA	NA	NA	NA	NA	NA	NA	10.1706	NA	11.673	NA
AEALPLQR	Eukaryota	Superkingdom	Eukaryota								13.0986	15.4048	14.9371	15.6736	13.4373	14.248	11.0656	13.775	13.7807	12.9132	12.9671	13.0889	13.0068	13.5418	13.5612	14.4995	13.0338	14.0596	12.9402	13.4997	12.8168	13.7813	13.3864	13.9242
AEAMDGSGASAIYPVIITPK	Lachnospiraceae bacterium A4	Species	Bacteria		Firmicutes	Clostridia	Clostridiales	Lachnospiraceae		Lachnospiraceae bacterium A4	NA	NA	NA	NA	NA	NA	NA	NA	12.4916	12.3371	NA	NA	NA	NA	NA	NA	NA	NA	NA	NA	NA	12.2411	NA	NA
AEAQGFEVYTAAEAAK	Bacteria	Superkingdom	Bacteria								14.0526	14.2181	14.8777	14.7038	16.4618	16.6599	16.3727	15.9273	15.4246	15.1087	15.2149	15.6557	16.2775	16.5409	15.6685	15.7096	16.3784	15.6478	16.5068	15.7632	15.0501	15.252	15.6938	15.687
AEAVSTLDR	Clostridium sp. MD294	Species	Bacteria		Firmicutes	Clostridia	Clostridiales	Clostridiaceae	Clostridium	Clostridium sp. MD294	NA	NA	14.8836	NA	15.6357	NA	NA	15.6304	15.483	NA	13.4429	15.7644	16.684	15.6217	16.7787	NA	15.1247	NA	16.7401	NA	NA	NA	16.0673	17.8472
AEAVTLLNR	Firmicutes	Phylum	Bacteria		Firmicutes						NA	NA	14.412	NA	NA	13.6145	NA	NA	12.7074	13.5616	12.7179	13.9295	NA	12.975	NA	NA	NA	13.1677	NA	NA	NA	NA	NA	NA
AEAYGPLTQGIAAPVNDLSR	Clostridiales	Order	Bacteria		Firmicutes	Clostridia	Clostridiales				10.9626	11.4371	10.9345	11.8328	13.8634	14.4245	14.8566	14.011	12.8615	NA	13.1735	11.9684	14.1955	13.7856	14.5901	12.6163	13.0901	12.7764	13.8598	12.1939	12.4909	11.8246	12.9584	14.651
AECQAQEDGYIAEFALPR	Lachnospiraceae bacterium A4	Species	Bacteria		Firmicutes	Clostridia	Clostridiales	Lachnospiraceae		Lachnospiraceae bacterium A4	NA	NA	11.2155	NA	11.7859	12.8023	11.5347	10.76	11.9651	11.789	NA	NA	NA	11.9565	NA	NA	12.7528	11.0248	NA	NA	NA	12.5678	11.7163	NA
AEDDMLPAAEAEQK	Lachnospiraceae bacterium 28-4	Species	Bacteria		Firmicutes	Clostridia	Clostridiales	Lachnospiraceae		Lachnospiraceae bacterium 28-4	NA	NA	NA	NA	NA	NA	NA	NA	NA	NA	NA	NA	NA	NA	NA	NA	11.4303	NA	11.6213	NA	NA	NA	NA	NA
AEDEEATFR	Muridae	Family	Eukaryota	Metazoa	Chordata	Mammalia	Rodentia	Muridae			13.7898	14.7198	14.5998	15.7476	13.965	13.8958	NA	12.8626	13.9311	13.651	13.9281	13.2788	15.0581	13.8974	14.2217	12.8327	13.4667	13.2221	14.2873	14.0082	13.7872	13.0339	15.0358	14.3694
AEDGEGTVIR	Catonella morbi	Species	Bacteria		Firmicutes	Clostridia	Clostridiales	Lachnospiraceae	Catonella	Catonella morbi	12.9375	NA	NA	NA	NA	NA	13.9659	NA	NA	NA	13.7144	15.3358	NA	NA	NA	NA	NA	NA	13.1283	15.131	NA	NA	NA	NA
AEDGSVIDYELIDQDAR	Mammalia	Class	Eukaryota	Metazoa	Chordata	Mammalia					13.7686	15.8726	14.693	16.1464	13.7898	15.1449	12.0607	13.5078	14.0618	13.7713	13.8842	14.1274	15.2472	13.7258	14.1154	14.6983	13.3588	14.226	13.9939	14.1937	12.7246	13.0587	14.6355	15.2179
AEDIIVYEIGNDGVSK	Lachnospiraceae bacterium A4	Species	Bacteria		Firmicutes	Clostridia	Clostridiales	Lachnospiraceae		Lachnospiraceae bacterium A4	12.4022	10.5966	14.2525	13.5982	13.3742	13.8496	13.3169	12.8103	NA	NA	NA	11.9672	NA	13.8782	NA	NA	NA	NA	NA	12.66	NA	NA	NA	NA
AEDKEWIPVTK	Metazoa	Kingdom	Eukaryota	Metazoa							11.0428	11.5334	11.4212	11.9832	NA	12.7853	NA	NA	NA	NA	NA	NA	11.1556	NA	10.8574	NA	NA	9.60113	11.4931	NA	NA	NA	NA	NA
AEDLTKEESNWR	Lachnospiraceae bacterium A4	Species	Bacteria		Firmicutes	Clostridia	Clostridiales	Lachnospiraceae		Lachnospiraceae bacterium A4	NA	NA	11.3518	10.9418	12.2345	13.3232	13.1127	NA	13.6082	14.0544	NA	NA	NA	12.3136	NA	NA	12.1667	12.6155	NA	NA	NA	12.6869	11.919	NA
AEDMAELTCLNEASVLHNLR	Mammalia	Class	Eukaryota	Metazoa	Chordata	Mammalia					NA	11.5442	NA	12.8579	NA	11.8599	NA	NA	NA	NA	NA	NA	NA	NA	NA	NA	NA	NA	NA	NA	NA	NA	NA	10.6166
AEDTAIYYCAR	Chordata	Phylum	Eukaryota	Metazoa	Chordata						NA	NA	15.7839	NA	14.4075	13.2044	16.0105	NA	NA	14.1514	NA	NA	14.612	14.4804	12.2767	13.8657	15.7794	15.3657	NA	NA	13.3045	NA	16.6821	12.4655
AEDTGIYYCTR	Metazoa	Kingdom	Eukaryota	Metazoa							15.1051	16.6902	12.3991	14.34	13.915	15.5237	13.1342	11.7461	13.4546	14.3733	14.2451	13.1057	15.0556	14.0219	NA	13.1511	NA	13.2174	13.6962	16.5182	12.6867	14.4265	15.5369	NA
AEDTIISAASCTTNCLAPMAK	Corallococcus	Genus	Bacteria		Proteobacteria	Deltaproteobacteria	Myxococcales	Myxococcaceae	Corallococcus		NA	NA	NA	NA	NA	11.0624	NA	11.5977	NA	NA	NA	NA	NA	NA	NA	NA	12.1369	NA	NA	NA	NA	NA	NA	NA
AEDTLIDIGSK	Lachnospiraceae bacterium A4	Species	Bacteria		Firmicutes	Clostridia	Clostridiales	Lachnospiraceae		Lachnospiraceae bacterium A4	NA	NA	NA	NA	NA	12.549	NA	NA	11.8058	11.2871	NA	NA	NA	NA	NA	NA	NA	NA	NA	NA	NA	NA	NA	NA
AEDTVISAASCTTNCLAPMAK	Clostridiales	Order	Bacteria		Firmicutes	Clostridia	Clostridiales				10.9432	9.29166	9.66327	9.21747	12.5728	11.1864	12.5602	NA	12.0057	NA	12.4258	9.64443	13.8421	12.5802	NA	9.62369	12.2727	11.3548	12.3442	11.5062	12.21	9.15049	13.6243	12.0916
AEDYADIDAAPEEK	Lactobacillus	Genus	Bacteria		Firmicutes	Bacilli	Lactobacillales	Lactobacillaceae	Lactobacillus		13.917	14.4803	13.1404	NA	NA	NA	11.755	13.0354	NA	NA	13.3145	14.1258	12.5285	NA	NA	NA	NA	NA	12.488	13.2468	12.8864	NA	12.3495	NA
AEDYADIDAAPEEKER	Lactobacillus	Genus	Bacteria		Firmicutes	Bacilli	Lactobacillales	Lactobacillaceae	Lactobacillus		14.1121	15.7016	12.6553	13.819	NA	10.994	12.0805	14.0194	11.2353	10.8904	13.8462	13.8405	12.015	11.7057	12.3142	11.8222	12.7993	11.2475	12.7929	12.7585	13.2066	13.3535	12.043	11.6299
AEDYASIDAAPEER	Lactobacillaceae	Family	Bacteria		Firmicutes	Bacilli	Lactobacillales	Lactobacillaceae			16.6242	16.7828	16.3689	16.1004	13.8712	15.0267	13.8371	15.6033	15.4541	16.3631	15.6601	14.8483	14.0122	14.0738	13.3184	15.5505	15.9557	14.6942	14.8274	16.373	13.8909	15.0211	13.6043	14.7887
AEDYASIDAAPEERER	Lactobacillaceae	Family	Bacteria		Firmicutes	Bacilli	Lactobacillales	Lactobacillaceae			13.0937	12.2129	NA	11.3047	NA	12.5459	10.8521	12.0304	11.487	12.4704	12.2017	12.4375	10.5426	NA	NA	11.6095	NA	10.7134	11.5132	11.8878	10.4097	11.8157	10.5573	12.4779
AEEDEILNR	Metazoa	Kingdom	Eukaryota	Metazoa							NA	12.6603	12.972	NA	NA	12.8605	NA	NA	NA	NA	NA	NA	NA	NA	NA	NA	NA	NA	NA	NA	NA	NA	NA	11.9517
AEEDVEPECIMEK	Mammalia	Class	Eukaryota	Metazoa	Chordata	Mammalia					10.6541	11.07	9.87367	10.7071	NA	11.1185	NA	NA	NA	NA	NA	NA	NA	NA	NA	NA	NA	NA	NA	NA	NA	NA	NA	NA
AEEFTTNPGTDSEK	Lachnospiraceae bacterium MD335	Species	Bacteria		Firmicutes	Clostridia	Clostridiales	Lachnospiraceae		Lachnospiraceae bacterium MD335	NA	NA	NA	NA	17.2519	NA	NA	NA	NA	NA	NA	NA	17.6205	17.2471	17.4964	18.3835	NA	NA	NA	NA	17.3861	17.5784	17.5784	16.4822
AEEHYVGEFQGLLSSIR	Lachnospiraceae bacterium A2	Species	Bacteria		Firmicutes	Clostridia	Clostridiales	Lachnospiraceae		Lachnospiraceae bacterium A2	NA	NA	NA	NA	NA	10.409	NA	10.3624	NA	NA	NA	NA	NA	NA	NA	NA	NA	NA	NA	NA	NA	NA	NA	NA
AEEIGLER	Thermococcus cleftensis	Species	Archaea		Euryarchaeota	Thermococci	Thermococcales	Thermococcaceae	Thermococcus	Thermococcus cleftensis	15.0145	14.2247	14.7922	14.218	15.6167	15.1202	13.6906	14.1068	13.6565	NA	14.0607	14.7263	16.4936	15.6011	16.0112	12.9863	13.5864	14.8206	16.3721	15.6434	13.8683	12.7296	16.9951	NA
AEEISQIIR	Bacteria	Superkingdom	Bacteria								NA	10.8658	11.3529	NA	12.6981	NA	13.0655	12.9614	NA	12.7675	11.4407	12.9408	NA	12.9151	13.0631	12.4355	12.3947	14.3765	12.0661	12.7376	NA	NA	12.2821	14.265
AEELFAVSEEHAK	Lachnospiraceae bacterium A2	Species	Bacteria		Firmicutes	Clostridia	Clostridiales	Lachnospiraceae		Lachnospiraceae bacterium A2	NA	NA	11.6007	NA	13.3136	13.8924	14.919	13.8755	NA	NA	NA	NA	12.4552	13.6648	10.9469	13.3979	NA	11.0934	NA	11.6878	14.4081	NA	13.1994	NA
AEELGLPILGVLR	Mammalia	Class	Eukaryota	Metazoa	Chordata	Mammalia					10.8527	11.8655	11.0653	11.6877	NA	11.7524	NA	NA	NA	NA	NA	NA	10.6912	NA	9.55403	NA	NA	10.5203	11.512	9.3223	NA	NA	11.0564	11.7431
AEELGYEVK	Firmicutes	Phylum	Bacteria		Firmicutes						12.9496	11.9728	14.5094	NA	14.4676	14.0198	14.6329	NA	13.6263	NA	13.9864	NA	14.1819	14.3683	14.2026	13.3087	14.5976	13.1066	13.6464	14.2228	13.225	NA	13.1534	NA
AEELLAQLGR	Rodentia	Order	Eukaryota	Metazoa	Chordata	Mammalia	Rodentia				NA	13.6757	13.2855	13.2703	NA	NA	NA	NA	NA	NA	NA	NA	NA	NA	NA	NA	NA	NA	NA	NA	NA	NA	NA	NA
AEETGDDSIAENAK	Pseudodesulfovibrio piezophilus	Species	Bacteria		Proteobacteria	Deltaproteobacteria	Desulfovibrionales	Desulfovibrionaceae	Pseudodesulfovibrio	Pseudodesulfovibrio piezophilus	10.7555	NA	8.15051	NA	10.718	NA	11.1482	10.7233	10.4539	NA	11.0512	NA	10.9156	10.9864	10.7221	9.7793	NA	NA	NA	NA	NA	8.86938	NA	NA
AEEVDPNFYSK	Chordata	Phylum	Eukaryota	Metazoa	Chordata						NA	12.0565	NA	NA	NA	11.9514	NA	NA	NA	NA	NA	NA	NA	NA	NA	NA	NA	NA	NA	NA	NA	NA	NA	NA
AEEWVEAQVK	Lactobacillus	Genus	Bacteria		Firmicutes	Bacilli	Lactobacillales	Lactobacillaceae	Lactobacillus		12.1137	NA	12.1743	NA	NA	NA	NA	NA	11.3947	NA	NA	11.725	NA	NA	NA	NA	12.0531	NA	NA	NA	NA	NA	NA	NA
AEEYEFLTPMEEAPK	Metazoa	Kingdom	Eukaryota	Metazoa							16.5526	17.962	18.1116	17.6252	16.6248	17.3819	14.559	17.0912	16.9352	16.4005	15.8409	16.9566	15.0692	16.6705	15.2786	16.1677	15.6689	16.6659	15.872	16.2511	14.4558	17.1062	17.1326	16.8699
AEEYLDILK	Mannheimia haemolytica	Species	Bacteria		Proteobacteria	Gammaproteobacteria	Pasteurellales	Pasteurellaceae	Mannheimia	Mannheimia haemolytica	NA	NA	NA	NA	11.4625	NA	NA	NA	NA	NA	NA	NA	12.5173	NA	12.1516	NA	NA	NA	NA	NA	NA	NA	NA	NA
AEFDTSEIDSEIAALR	Mus musculus	Species	Eukaryota	Metazoa	Chordata	Mammalia	Rodentia	Muridae	Mus	Mus musculus	NA	NA	NA	NA	NA	NA	NA	NA	NA	NA	NA	NA	10.5613	NA	NA	NA	NA	NA	NA	NA	NA	NA	10.4144	NA
AEFGPPGPGPGSR	Mammalia	Class	Eukaryota	Metazoa	Chordata	Mammalia					NA	13.443	12.2029	NA	NA	12.1852	NA	NA	NA	NA	NA	NA	NA	NA	NA	NA	NA	NA	NA	NA	NA	NA	NA	NA
AEFIVGGK	Metazoa	Kingdom	Eukaryota	Metazoa							NA	NA	NA	NA	NA	11.7763	NA	NA	NA	NA	NA	NA	NA	NA	NA	NA	NA	NA	NA	NA	NA	NA	NA	NA
AEFLAHGESAK	Mucispirillum schaedleri	Species	Bacteria		Deferribacteres	Deferribacteres	Deferribacterales	Deferribacteraceae	Mucispirillum	Mucispirillum schaedleri	NA	NA	NA	NA	NA	NA	NA	15.135	12.654	NA	NA	14.7394	14.4603	NA	NA	NA	NA	NA	NA	NA	14.3825	NA	14.9692	NA
AEFVAQMVK	Anaerotruncus sp. G3(2012)	Species	Bacteria		Firmicutes	Clostridia	Clostridiales	Ruminococcaceae	Anaerotruncus	Anaerotruncus sp. G3(2012)	NA	NA	NA	NA	11.9884	NA	12.2914	NA	12.5176	NA	NA	NA	NA	12.5279	12.0218	12.648	NA	NA	NA	NA	12.2656	12.3916	13.4202	12.8895
AEFWLDLQPQAK	Mammalia	Class	Eukaryota	Metazoa	Chordata	Mammalia					NA	11.4444	NA	11.1279	NA	11.3707	NA	NA	NA	NA	NA	NA	11.328	NA	NA	NA	NA	NA	NA	NA	NA	NA	NA	11.1524
AEGEAFGK	Bacteria	Superkingdom	Bacteria								14.2196	NA	15.8931	14.2282	NA	14.7765	14.2911	NA	NA	12.0576	14.8265	NA	NA	NA	NA	NA	NA	13.8427	13.4167	15.3575	NA	15.1235	NA	12.2771
AEGEAFGKK	Bacteria	Superkingdom	Bacteria								NA	14.1906	12.1386	12.915	15.172	NA	14.2669	NA	NA	10.3869	NA	NA	NA	14.8101	13.2819	14.3227	13.9215	12.2597	14.3727	NA	NA	11.1958	NA	NA
AEGESLSQYLEEK	Lachnospiraceae bacterium A2	Species	Bacteria		Firmicutes	Clostridia	Clostridiales	Lachnospiraceae		Lachnospiraceae bacterium A2	NA	NA	10.7758	NA	NA	NA	NA	NA	NA	NA	NA	NA	NA	NA	NA	10.7148	NA	NA	NA	NA	NA	NA	NA	NA
AEGGFIWACK	Bacteria	Superkingdom	Bacteria								NA	NA	NA	11.5005	12.5868	NA	13.4774	12.7276	12.3188	NA	NA	NA	11.8467	12.3758	NA	13.0068	12.9809	NA	NA	NA	13.0782	12.3221	12.4328	11.8902
AEGICDACGAQTVLR	Eubacterium plexicaudatum	Species	Bacteria		Firmicutes	Clostridia	Clostridiales	Eubacteriaceae	Eubacterium	Eubacterium plexicaudatum	NA	NA	NA	NA	NA	NA	NA	NA	NA	NA	NA	NA	10.7826	NA	NA	NA	NA	NA	10.7794	NA	NA	11.308	10.697	NA
AEGIDLSGDK	Firmicutes	Phylum	Bacteria		Firmicutes						NA	NA	NA	NA	14.1398	NA	NA	NA	13.1335	NA	NA	12.8417	14.2163	14.0447	13.7975	NA	NA	NA	NA	12.6526	NA	NA	14.1413	NA
AEGIDLSGDKVAMQR	Firmicutes	Phylum	Bacteria		Firmicutes						NA	NA	NA	NA	NA	NA	11.2463	NA	NA	NA	NA	NA	11.1954	10.9403	11.3837	NA	NA	NA	NA	NA	NA	NA	NA	NA
AEGKNPFTLDSK	Firmicutes	Phylum	Bacteria		Firmicutes						NA	NA	NA	NA	NA	NA	NA	NA	NA	NA	NA	NA	NA	NA	NA	NA	NA	NA	NA	NA	NA	NA	NA	13.082
AEGLAEGETLK	Lachnospiraceae bacterium MD335	Species	Bacteria		Firmicutes	Clostridia	Clostridiales	Lachnospiraceae		Lachnospiraceae bacterium MD335	13.9265	NA	15.0781	NA	14.155	13.7368	13.3854	14.2178	15.2118	14.9849	15.141	15.0658	NA	14.3372	NA	NA	15.9174	14.3177	15.6926	15.2368	15.1579	15.0427	NA	NA
AEGMGAFLER	Butyrivibrio fibrisolvens	Species	Bacteria		Firmicutes	Clostridia	Clostridiales	Lachnospiraceae	Butyrivibrio	Butyrivibrio fibrisolvens	NA	NA	NA	NA	NA	NA	14.3782	13.9783	11.6964	13.4095	NA	14.438	13.6952	12.5802	NA	12.595	NA	NA	13.0482	NA	NA	NA	NA	NA
AEGQVLVLDGR	Bos taurus	Species	Eukaryota	Metazoa	Chordata	Mammalia	Artiodactyla	Bovidae	Bos	Bos taurus	12.6007	14.429	13.7596	13.9639	11.9579	13.4519	NA	11.4742	12.8722	11.2664	NA	12.3353	12.7948	12.2737	13.8235	NA	11.3645	12.5641	12.666	NA	12.2948	11.4827	13.4707	12.7007
AEGSDVANAVLDGADCIMLSGETAK	Metazoa	Kingdom	Eukaryota	Metazoa							11.3299	12.4604	11.5684	11.1867	NA	12.0913	NA	10.2568	NA	NA	10.567	10.7685	10.6604	9.04504	NA	NA	8.96015	10.8099	10.9763	10.6352	NA	8.78983	11.3448	11.2846
AEGSVDGVPADATTDSFHYVFK	Lachnospiraceae bacterium MD335	Species	Bacteria		Firmicutes	Clostridia	Clostridiales	Lachnospiraceae		Lachnospiraceae bacterium MD335	NA	NA	NA	NA	NA	NA	NA	NA	NA	NA	NA	NA	13.6667	NA	NA	NA	NA	NA	NA	NA	11.912	NA	13.4226	NA
AEGVDLSGDK	Clostridiales	Order	Bacteria		Firmicutes	Clostridia	Clostridiales				NA	13.6165	13.3789	14.037	15.5389	15.0719	16.2609	14.7835	14.4082	13.685	NA	14.7637	15.9037	15.6951	16.3622	14.4837	15.7154	16.116	15.6649	15.5752	NA	14.9151	15.5694	15.1757
AEGYNQIADIFTETANNEK	Mucispirillum schaedleri	Species	Bacteria		Deferribacteres	Deferribacteres	Deferribacterales	Deferribacteraceae	Mucispirillum	Mucispirillum schaedleri	NA	NA	NA	NA	10.3735	NA	NA	11.2694	NA	NA	NA	NA	10.5225	10.939	10.2049	NA	NA	10.7336	NA	NA	NA	NA	NA	10.7302
AEHHYLEK	Lactobacillus	Genus	Bacteria		Firmicutes	Bacilli	Lactobacillales	Lactobacillaceae	Lactobacillus		NA	NA	NA	NA	NA	NA	NA	NA	NA	NA	NA	10.7174	NA	NA	NA	NA	NA	NA	NA	NA	NA	NA	NA	NA
AEIASLHQR	Clostridiales	Order	Bacteria		Firmicutes	Clostridia	Clostridiales				14.0062	NA	NA	NA	17.7238	17.2065	16.6182	17.082	13.9092	13.8789	13.9604	13.5247	16.3216	17.7012	16.9031	16.9507	15.8093	16.4266	16.4311	15.8986	17.7546	15.6092	16.4461	17.6983
AEIDMLDIR	Mammalia	Class	Eukaryota	Metazoa	Chordata	Mammalia					20.383	21.4442	21.0972	21.1127	19.0825	19.8084	17.318	19.2118	20.0693	19.5267	19.1777	19.292	19.3662	19.0669	18.8143	19.7987	19.2384	18.657	19.0617	19.2697	19.1049	19.7454	20.0736	18.662
AEIGNYDEIAAYR	Lachnospiraceae bacterium A4	Species	Bacteria		Firmicutes	Clostridia	Clostridiales	Lachnospiraceae		Lachnospiraceae bacterium A4	NA	NA	NA	NA	NA	NA	NA	NA	11.0918	NA	NA	NA	NA	NA	NA	NA	NA	NA	NA	NA	NA	NA	NA	NA
AEIIEYNPGFEVNHK	Eubacterium plexicaudatum	Species	Bacteria		Firmicutes	Clostridia	Clostridiales	Eubacteriaceae	Eubacterium	Eubacterium plexicaudatum	12.1051	10.4559	10.0961	10.9831	12.4065	13.6036	NA	11.7003	NA	NA	11.1611	NA	13.1163	12.7731	11.8026	11.9081	10.0698	NA	13.6962	10.5892	12.5816	12.7695	12.4977	14.7921
AEIKPGVR	Chordata	Phylum	Eukaryota	Metazoa	Chordata						12.8065	13.3332	12.8903	13.5399	12.3707	14.1562	12.0635	NA	NA	NA	13.3443	NA	NA	12.4418	13.4599	12.1242	NA	13.1457	13.8116	13.1649	NA	11.3591	NA	13.1991
AEIQVALEK	Lachnospiraceae	Family	Bacteria		Firmicutes	Clostridia	Clostridiales	Lachnospiraceae			NA	12.5561	NA	13.7305	13.169	14.2605	14.7044	15.097	14.082	12.7181	12.6805	11.317	13.121	13.3849	13.8709	12.1637	14.8204	12.9705	13.169	NA	12.4026	13.0647	13.169	13.2829
AEISCIDNK	Chordata	Phylum	Eukaryota	Metazoa	Chordata						NA	13.5981	13.7518	13.5828	NA	NA	NA	NA	NA	NA	NA	NA	NA	NA	NA	NA	NA	13.8482	NA	NA	NA	NA	NA	NA
AEITDAEGLGLK	Chordata	Phylum	Eukaryota	Metazoa	Chordata						NA	NA	NA	12.1562	NA	11.5118	NA	NA	NA	NA	NA	NA	NA	NA	NA	NA	NA	NA	NA	NA	NA	NA	NA	NA
AEITPMYGAQK	Mus musculus	Species	Eukaryota	Metazoa	Chordata	Mammalia	Rodentia	Muridae	Mus	Mus musculus	NA	12.2531	12.4123	12.3268	NA	12.3802	NA	NA	NA	NA	NA	12.3116	12.3718	NA	NA	NA	NA	NA	11.5428	NA	NA	NA	12.8241	NA
AEIVMNEEPVDLDGLNYLK	Lachnospiraceae bacterium M18-1	Species	Bacteria		Firmicutes	Clostridia	Clostridiales	Lachnospiraceae		Lachnospiraceae bacterium M18-1	NA	NA	NA	NA	9.79468	NA	10.5218	10.5804	NA	NA	NA	NA	NA	NA	9.44564	NA	NA	NA	NA	NA	NA	NA	8.43719	NA
AEIVPVTTTVLDDK	Rodentia	Order	Eukaryota	Metazoa	Chordata	Mammalia	Rodentia				NA	11.817	11.9658	NA	NA	NA	NA	NA	NA	NA	NA	NA	NA	NA	NA	NA	NA	NA	NA	NA	NA	NA	NA	NA
AELAELPLR	Metazoa	Kingdom	Eukaryota	Metazoa							11.1241	11.7913	11.4894	11.6885	NA	11.7616	NA	11.4791	11.209	NA	NA	10.8856	NA	NA	NA	NA	NA	11.6641	11.3012	NA	11.4668	NA	11.4706	11.7325
AELDDTPMR	Chordata	Phylum	Eukaryota	Metazoa	Chordata						12.2492	13.4516	NA	NA	NA	13.1328	NA	NA	NA	NA	NA	NA	NA	NA	NA	NA	NA	NA	NA	NA	NA	NA	NA	NA
AELDLVEAK	Bacteria	Superkingdom	Bacteria								NA	13.3501	13.3043	14.4175	14.473	NA	14.9839	14.0599	14.6841	NA	14.8407	13.1227	15.031	14.5118	15.018	13.6404	13.8232	13.556	14.6547	NA	NA	NA	14.0625	NA
AELDMFTTPK	Lachnospiraceae bacterium A2	Species	Bacteria		Firmicutes	Clostridia	Clostridiales	Lachnospiraceae		Lachnospiraceae bacterium A2	14.2473	NA	15.9379	NA	15.2134	17.4935	16.9754	16.4516	NA	NA	NA	NA	NA	15.3113	13.1954	17.5093	NA	NA	13.1591	NA	17.0262	NA	14.8062	13.3979
AELDQLPGAQEK	Mus musculus	Species	Eukaryota	Metazoa	Chordata	Mammalia	Rodentia	Muridae	Mus	Mus musculus	11.7593	13.9315	13.6866	14.7599	12.9924	13.4072	NA	12.7149	12.5687	NA	11.8882	12.1231	14.6415	12.898	13.3387	NA	NA	NA	13.0708	12.3782	NA	NA	13.6307	13.8697
AELDTVCR	Metazoa	Kingdom	Eukaryota	Metazoa							15.1753	NA	17.0976	14.6372	NA	NA	14.6813	14.7701	15.3899	14.8056	15.1757	13.5506	NA	NA	NA	14.2827	15.769	13.4166	15.1426	14.1044	14.8484	13.1845	14.9147	NA
AELEALLSSK	Mammalia	Class	Eukaryota	Metazoa	Chordata	Mammalia					11.3404	13.9436	13.5968	13.5604	NA	12.012	NA	NA	NA	NA	NA	NA	NA	NA	11.1578	NA	NA	NA	11.6604	NA	NA	NA	NA	NA
AELEALLSSKDDVGK	Mammalia	Class	Eukaryota	Metazoa	Chordata	Mammalia					NA	NA	NA	10.9448	NA	10.9572	NA	NA	NA	NA	NA	NA	NA	NA	NA	NA	NA	NA	NA	NA	NA	NA	NA	NA
AELEHTNNVDAAAYLGK	Lachnospiraceae bacterium MD335	Species	Bacteria		Firmicutes	Clostridia	Clostridiales	Lachnospiraceae		Lachnospiraceae bacterium MD335	NA	NA	NA	NA	NA	NA	11.7926	12.0972	NA	NA	NA	13.6569	14.1053	13.6786	NA	NA	NA	12.7789	14.4979	NA	13.1792	NA	14.2668	13.7937
AELEKTNDVEAAAYLGK	Clostridiales	Order	Bacteria		Firmicutes	Clostridia	Clostridiales				12.369	NA	NA	NA	NA	11.0096	13.0216	NA	NA	NA	NA	NA	10.9548	NA	12.5255	10.7973	NA	NA	NA	NA	NA	NA	10.8464	11.0271
AELENVPLR	Lachnospiraceae bacterium A4	Species	Bacteria		Firmicutes	Clostridia	Clostridiales	Lachnospiraceae		Lachnospiraceae bacterium A4	14.4907	11.9103	16.4606	15.598	17.9003	17.2011	17.5557	16.522	16.5141	16.8255	12.8634	13.7566	NA	18.1112	14.0946	15.5596	16.778	15.4568	15.1937	14.8138	NA	16.9688	15.1606	13.5578
AELFPADKPVFTK	Anaerotruncus sp. G3(2012)	Species	Bacteria		Firmicutes	Clostridia	Clostridiales	Ruminococcaceae	Anaerotruncus	Anaerotruncus sp. G3(2012)	NA	NA	NA	NA	10.8575	NA	10.0318	NA	11.5085	NA	NA	NA	NA	10.6981	10.9771	11.0806	NA	NA	11.3375	NA	10.8495	10.5215	12.0517	12.3841
AELGMNDSPSQSPPVK	Rodentia	Order	Eukaryota	Metazoa	Chordata	Mammalia	Rodentia				NA	10.6603	9.7105	10.0032	NA	10.1237	NA	NA	NA	NA	NA	NA	NA	NA	NA	NA	NA	NA	NA	NA	NA	NA	NA	NA
AELGNSGDWSQIADEVMSPK	Muridae	Family	Eukaryota	Metazoa	Chordata	Mammalia	Rodentia	Muridae			NA	10.102	9.84847	9.65303	NA	10.0561	NA	NA	NA	NA	NA	NA	9.72272	NA	NA	NA	NA	NA	NA	NA	NA	NA	NA	9.94814
AELGVEVEANGPANESDIADQVQMLDSAIQK	Lachnospiraceae bacterium M18-1	Species	Bacteria		Firmicutes	Clostridia	Clostridiales	Lachnospiraceae		Lachnospiraceae bacterium M18-1	NA	NA	NA	9.89645	10.3299	11.5303	NA	10.7552	NA	NA	NA	NA	NA	9.99554	10.4131	10.0643	10.1722	9.93411	NA	NA	NA	NA	NA	9.41555
AELIAQPELK	Chordata	Phylum	Eukaryota	Metazoa	Chordata						NA	12.1338	10.7334	11.4704	NA	12.7804	NA	NA	NA	NA	NA	NA	NA	NA	NA	NA	NA	11.9563	11.5628	NA	NA	NA	NA	11.5631
AELLFQGK	Muridae	Family	Eukaryota	Metazoa	Chordata	Mammalia	Rodentia	Muridae			12.7303	13.5746	11.7466	12.4802	NA	13.6553	NA	NA	NA	NA	NA	NA	NA	NA	NA	NA	NA	13.1726	NA	NA	NA	NA	NA	NA
AELNEFLTR	Eukaryota	Superkingdom	Eukaryota								14.2139	16.2725	15.9489	16.1938	14.1276	15.2151	12.2267	13.7064	14.2727	13.455	13.734	14.0016	14.1782	14.0222	14.6138	13.6972	13.9946	14.3233	14.1861	13.6694	13.6244	13.4092	14.2144	14.1305
AELNPWPEYINTR	Mammalia	Class	Eukaryota	Metazoa	Chordata	Mammalia					NA	11.5646	NA	11.609	NA	11.5416	NA	NA	11.3741	NA	NA	NA	NA	NA	NA	NA	NA	10.0876	NA	NA	NA	NA	NA	NA
AELSSLQTSR	Mammalia	Class	Eukaryota	Metazoa	Chordata	Mammalia					NA	14.7766	14.3437	14.3148	NA	14.2538	NA	NA	NA	NA	NA	NA	NA	NA	NA	NA	NA	NA	NA	NA	NA	NA	NA	NA
AELVAAIADK	Eubacterium plexicaudatum	Species	Bacteria		Firmicutes	Clostridia	Clostridiales	Eubacteriaceae	Eubacterium	Eubacterium plexicaudatum	NA	12.1256	NA	NA	12.5923	NA	NA	NA	NA	NA	NA	NA	13.1953	12.387	NA	NA	NA	NA	14.0854	11.4117	NA	NA	NA	NA
AELVAAVAAK	[Eubacterium] sulci	Species	Bacteria		Firmicutes	Clostridia	Clostridiales	Clostridiales Family XIII. Incertae Sedis		[Eubacterium] sulci	NA	12.3437	NA	NA	NA	NA	NA	NA	NA	NA	NA	NA	NA	NA	14.2933	NA	NA	NA	NA	NA	NA	NA	NA	NA
AELVFTAADGTETR	Clostridium	Genus	Bacteria		Firmicutes	Clostridia	Clostridiales	Clostridiaceae	Clostridium		12.9667	11.1942	11.444	11.7424	12.9192	12.2252	14.2056	NA	11.7254	NA	12.7405	NA	12.7023	13.3334	14.3972	13.2379	NA	NA	NA	NA	NA	NA	12.5429	12.6067
AELVFTAEDGTETR	Clostridiales	Order	Bacteria		Firmicutes	Clostridia	Clostridiales				12.0575	10.0909	10.5721	NA	12.5302	11.3017	13.368	NA	11.1787	NA	11.9642	12.8042	11.4936	12.8628	10.8462	10.05	11.7355	11.0999	12.697	13.3903	10.5696	11.5027	11.1974	NA
AELVFTGEDGTQIR	Lachnospiraceae bacterium MD335	Species	Bacteria		Firmicutes	Clostridia	Clostridiales	Lachnospiraceae		Lachnospiraceae bacterium MD335	NA	NA	NA	NA	NA	NA	NA	NA	NA	NA	NA	NA	12.8629	NA	NA	12.9008	NA	NA	NA	NA	11.8351	NA	11.4652	12.5785
AELVSAIADK	Phenylobacterium zucineum	Species	Bacteria		Proteobacteria	Alphaproteobacteria	Caulobacterales	Caulobacteraceae	Phenylobacterium	Phenylobacterium zucineum	NA	NA	NA	NA	NA	NA	NA	NA	NA	NA	NA	NA	NA	NA	12.8611	NA	NA	NA	NA	NA	NA	12.2983	NA	NA
AELVSNVATATGLTK	Lactobacillus	Genus	Bacteria		Firmicutes	Bacilli	Lactobacillales	Lactobacillaceae	Lactobacillus		14.3019	NA	13.0671	NA	NA	11.0515	11.5904	14.002	9.33332	NA	NA	14.1913	12.9234	NA	NA	13.046	NA	10.9269	13.0565	NA	13.7112	13.3675	12.2653	NA
AELVSNVATATGLTKK	Lactobacillus	Genus	Bacteria		Firmicutes	Bacilli	Lactobacillales	Lactobacillaceae	Lactobacillus		10.9198	10.6416	NA	NA	NA	NA	NA	NA	NA	NA	10.1576	NA	NA	NA	NA	NA	NA	NA	10.3695	9.52911	NA	NA	NA	NA
AEMALHDR	Lachnospiraceae	Family	Bacteria		Firmicutes	Clostridia	Clostridiales	Lachnospiraceae			17.4978	14.8202	15.1284	15.211	17.9901	17.0228	18.9135	NA	16.9878	17.4706	17.3931	18.2865	17.512	18.2094	18.0994	16.2117	16.9134	17.6978	17.6978	18.6861	20.1213	16.8447	15.8977	16.1136
AEMALHDRDVK	Lachnospiraceae	Family	Bacteria		Firmicutes	Clostridia	Clostridiales	Lachnospiraceae			NA	NA	NA	NA	NA	14.9738	NA	15.0008	13.9737	NA	NA	16.5972	15.9423	NA	NA	NA	NA	NA	15.4548	NA	14.5589	NA	16.3321	14.2304
AEMALHDRDVKR	Lachnospiraceae	Family	Bacteria		Firmicutes	Clostridia	Clostridiales	Lachnospiraceae			11.439	NA	NA	NA	NA	10.73	12.6455	NA	NA	NA	10.6374	NA	NA	NA	NA	NA	NA	NA	10.6619	11.7152	NA	NA	NA	NA
AEMDEVER	Chordata	Phylum	Eukaryota	Metazoa	Chordata						NA	NA	NA	NA	NA	NA	NA	NA	NA	NA	NA	NA	NA	NA	NA	NA	NA	NA	NA	NA	NA	NA	NA	13.052
AEMDREDAEHVK	Mus musculus	Species	Eukaryota	Metazoa	Chordata	Mammalia	Rodentia	Muridae	Mus	Mus musculus	NA	NA	NA	NA	NA	NA	NA	11.4509	NA	NA	NA	11.901	12.6747	NA	NA	NA	NA	NA	13.4412	NA	12.8599	NA	13.4475	10.7207
AEMEEANIK	Mus musculus	Species	Eukaryota	Metazoa	Chordata	Mammalia	Rodentia	Muridae	Mus	Mus musculus	NA	12.4284	NA	NA	NA	13.4084	NA	NA	12.6664	NA	NA	NA	13.2729	NA	NA	NA	NA	12.6655	NA	NA	NA	NA	NA	NA
AEMQQILQGLDK	Rodentia	Order	Eukaryota	Metazoa	Chordata	Mammalia	Rodentia				NA	12.104	11.0587	11.4577	NA	NA	NA	NA	NA	NA	NA	NA	NA	NA	NA	NA	NA	NA	NA	NA	NA	NA	NA	NA
AEMYPDVK	Eubacterium plexicaudatum	Species	Bacteria		Firmicutes	Clostridia	Clostridiales	Eubacteriaceae	Eubacterium	Eubacterium plexicaudatum	NA	NA	NA	NA	NA	NA	NA	NA	NA	NA	NA	NA	13.4786	NA	NA	NA	NA	NA	NA	NA	NA	NA	NA	NA
AENEALAMQK	Mammalia	Class	Eukaryota	Metazoa	Chordata	Mammalia					NA	14.0467	12.9467	13.6442	NA	13.3589	NA	NA	NA	NA	NA	NA	NA	NA	NA	NA	NA	NA	NA	NA	NA	NA	NA	NA
AENEFVTVK	Mus musculus	Species	Eukaryota	Metazoa	Chordata	Mammalia	Rodentia	Muridae	Mus	Mus musculus	NA	NA	NA	NA	NA	NA	NA	NA	NA	NA	NA	NA	NA	NA	NA	NA	13.098	NA	NA	NA	NA	NA	NA	NA
AENEGFVYK	Lachnospiraceae bacterium A4	Species	Bacteria		Firmicutes	Clostridia	Clostridiales	Lachnospiraceae		Lachnospiraceae bacterium A4	NA	NA	11.1193	NA	12.7588	NA	NA	NA	NA	NA	NA	NA	NA	12.521	NA	NA	NA	NA	NA	NA	NA	11.4297	NA	NA
AENFFILR	Eukaryota	Superkingdom	Eukaryota								12.3775	14.7121	14.2342	14.8265	12.4916	13.6536	11.1126	13.1941	12.6741	11.0349	12.1111	11.9978	12.6131	12.5229	13.6614	12.1105	12.6337	12.7623	12.7065	12.4441	11.6431	12.4095	12.7987	13.1073
AENGEEAWEYIVK	Lachnospiraceae bacterium A4	Species	Bacteria		Firmicutes	Clostridia	Clostridiales	Lachnospiraceae		Lachnospiraceae bacterium A4	13.7684	NA	11.3883	10.9058	13.2937	12.6081	14.7846	11.9153	11.9376	11.3931	12.9058	13.382	12.384	13.3695	13.6258	11.918	11.5954	12.5715	12.865	13.9123	12.1355	12.4452	13.2751	NA
AENGEEAWK	Bacteria	Superkingdom	Bacteria								NA	NA	NA	NA	NA	NA	NA	NA	NA	NA	10.9117	NA	NA	11.9799	11.876	NA	11.4297	NA	11.6861	NA	NA	NA	NA	11.9809
AENHLWEFGTEK	Lactobacillus reuteri	Species	Bacteria		Firmicutes	Bacilli	Lactobacillales	Lactobacillaceae	Lactobacillus	Lactobacillus reuteri	NA	NA	NA	NA	NA	NA	NA	12.1868	NA	NA	NA	NA	NA	NA	NA	NA	NA	NA	NA	NA	NA	NA	NA	NA
AENIGASDEEYNEEIKK	Lachnospiraceae bacterium MD335	Species	Bacteria		Firmicutes	Clostridia	Clostridiales	Lachnospiraceae		Lachnospiraceae bacterium MD335	9.84082	NA	NA	NA	11.4594	NA	NA	NA	10.8528	NA	NA	NA	11.1093	11.914	12.358	11.2727	10.8511	NA	12.1291	10.7854	NA	9.68867	12.5733	13.2386
AENIIFENSFNR	Lachnospiraceae bacterium MD335	Species	Bacteria		Firmicutes	Clostridia	Clostridiales	Lachnospiraceae		Lachnospiraceae bacterium MD335	NA	NA	NA	NA	13.521	NA	NA	NA	NA	NA	NA	NA	14.2935	13.3014	13.0962	14.4075	NA	NA	NA	12.3237	13.8912	14.1636	13.6729	12.775
AENISIMDGK	Clostridium	Genus	Bacteria		Firmicutes	Clostridia	Clostridiales	Clostridiaceae	Clostridium		NA	NA	NA	NA	12.5636	NA	NA	NA	NA	NA	NA	NA	13.6649	13.0647	NA	NA	13.1365	NA	12.9853	NA	NA	14.7413	NA	NA
AENLGEVLR	Eukaryota	Superkingdom	Eukaryota								13.1301	13.303	13.3387	13.4982	NA	14.2181	NA	NA	NA	NA	12.0575	NA	NA	NA	NA	NA	NA	NA	NA	NA	NA	NA	NA	NA
AENLHVTLDR	Lactobacillus	Genus	Bacteria		Firmicutes	Bacilli	Lactobacillales	Lactobacillaceae	Lactobacillus		NA	NA	NA	NA	NA	NA	NA	13.9283	NA	NA	NA	13.1737	13.0347	NA	NA	NA	NA	NA	NA	NA	14.5279	NA	11.8293	11.1613
AENLVIDGAIQGK	Lachnospiraceae bacterium A4	Species	Bacteria		Firmicutes	Clostridia	Clostridiales	Lachnospiraceae		Lachnospiraceae bacterium A4	NA	NA	NA	NA	13.0149	12.3362	13.6565	11.8574	12.3362	NA	NA	NA	NA	13.3785	NA	10.6827	12.383	12.2381	11.8336	NA	NA	12.146	12.5992	NA
AENSSLNLIGK	Metazoa	Kingdom	Eukaryota	Metazoa							NA	12.2287	NA	11.7757	NA	12.4362	NA	NA	NA	NA	NA	NA	NA	NA	NA	NA	NA	NA	NA	NA	NA	NA	NA	NA
AENVVVQDGKGDQAEQTNQIQNFITQK	butyrate-producing bacterium SS3/4	Species	Bacteria		Firmicutes	Clostridia	Clostridiales			butyrate-producing bacterium SS3/4	NA	NA	NA	NA	NA	NA	NA	11.3866	NA	NA	NA	NA	9.34465	NA	NA	NA	NA	NA	NA	NA	NA	NA	8.8977	NA
AENYDISPADR	Metazoa	Kingdom	Eukaryota	Metazoa							13.1347	13.1342	12.2598	11.92	NA	13.3305	NA	NA	NA	11.2918	NA	NA	NA	NA	NA	NA	NA	11.5348	11.7701	12.3683	NA	NA	NA	NA
AEPEDHYFLLTEPPLNTPENR	Metazoa	Kingdom	Eukaryota	Metazoa							NA	NA	NA	NA	NA	13.1443	NA	11.2633	NA	NA	NA	NA	12.0581	NA	12.281	NA	NA	NA	11.5575	NA	NA	NA	11.6599	10.7804
AEPGQFIILR	Bacteria	Superkingdom	Bacteria								NA	NA	NA	NA	12.0038	NA	NA	NA	NA	NA	NA	NA	NA	11.8529	NA	NA	NA	NA	NA	NA	NA	NA	11.8719	11.5659
AEPLALIVSHDYK	Mus musculus	Species	Eukaryota	Metazoa	Chordata	Mammalia	Rodentia	Muridae	Mus	Mus musculus	NA	NA	NA	NA	NA	NA	NA	10.3113	NA	NA	NA	NA	10.5536	NA	NA	NA	NA	NA	NA	NA	8.52789	NA	9.20055	NA
AEPPTWLELQAVK	Mammalia	Class	Eukaryota	Metazoa	Chordata	Mammalia					NA	NA	NA	14.4217	NA	13.4124	NA	NA	NA	NA	12.8415	NA	14.2897	NA	NA	NA	NA	11.551	NA	NA	NA	NA	13.9076	14.1881
AEQEEYVQEGIR	Metazoa	Kingdom	Eukaryota	Metazoa							NA	10.9179	10.179	11.1456	NA	10.9179	NA	NA	10.4234	NA	NA	NA	NA	NA	NA	NA	NA	NA	NA	NA	NA	NA	11.3811	NA
AEQFLVGTSR	Chordata	Phylum	Eukaryota	Metazoa	Chordata						NA	12.171	11.3146	11.7901	NA	NA	NA	NA	NA	NA	NA	NA	NA	NA	NA	NA	NA	11.5767	NA	11.2531	NA	NA	NA	11.5986
AEQFYCGDTEGK	Chordata	Phylum	Eukaryota	Metazoa	Chordata						NA	NA	10.3378	9.70162	NA	10.6968	NA	NA	10.0576	NA	NA	9.52281	9.96101	NA	NA	NA	NA	9.18475	NA	NA	NA	NA	9.3049	NA
AEQFYCGDTEGKK	Chordata	Phylum	Eukaryota	Metazoa	Chordata						NA	10.0217	9.4865	9.92472	NA	NA	NA	NA	9.42033	NA	NA	NA	NA	NA	NA	NA	NA	9.34535	NA	NA	NA	NA	9.75983	NA
AEQGIKPNTIR	Lachnospiraceae bacterium A4	Species	Bacteria		Firmicutes	Clostridia	Clostridiales	Lachnospiraceae		Lachnospiraceae bacterium A4	NA	NA	NA	NA	11.6691	NA	NA	NA	NA	NA	NA	NA	NA	NA	NA	NA	11.1366	NA	NA	NA	NA	12.7814	NA	NA
AEQINQAAGEASAVLAK	Mammalia	Class	Eukaryota	Metazoa	Chordata	Mammalia					NA	10.4679	10.3344	NA	NA	NA	NA	NA	NA	NA	NA	NA	NA	NA	NA	NA	NA	NA	NA	NA	NA	NA	NA	NA
AEQMASVQNAQR	Chordata	Phylum	Eukaryota	Metazoa	Chordata						NA	10.6148	NA	NA	NA	NA	NA	NA	NA	NA	NA	NA	NA	NA	NA	NA	NA	NA	NA	NA	NA	NA	NA	11.1743
AEQSLHDLQER	Chordata	Phylum	Eukaryota	Metazoa	Chordata						NA	11.2151	NA	10.6728	NA	NA	NA	NA	NA	NA	NA	NA	NA	NA	NA	NA	NA	NA	NA	NA	NA	NA	NA	NA
AERPTCLLGFEVK	Mus musculus	Species	Eukaryota	Metazoa	Chordata	Mammalia	Rodentia	Muridae	Mus	Mus musculus	NA	NA	NA	NA	15.6106	15.6984	13.7128	14.6068	14.448	NA	14.0346	14.2648	15.4475	15.6911	13.6735	14.7996	16.9539	14.8173	14.9748	12.6953	15.3436	15.7791	15.5517	15.4868
AESDIMNR	Chordata	Phylum	Eukaryota	Metazoa	Chordata						13.8267	14.7977	13.9661	13.3944	NA	14.749	12.3206	NA	NA	12.371	12.9639	NA	NA	NA	NA	11.9464	NA	13.4624	14.014	13.5077	NA	NA	NA	13.7344
AESEEGPDVLR	Chordata	Phylum	Eukaryota	Metazoa	Chordata						NA	NA	10.903	11.6737	NA	11.3332	NA	NA	NA	NA	NA	NA	NA	NA	NA	NA	NA	NA	NA	NA	NA	NA	NA	NA
AESPVITTQCIR	Clostridiales	Order	Bacteria		Firmicutes	Clostridia	Clostridiales				NA	NA	NA	NA	NA	NA	11.869	NA	NA	NA	11.263	13.6058	NA	NA	NA	NA	NA	NA	12.6115	12.7902	NA	13.6058	NA	NA
AESTPEIAEQR	Chordata	Phylum	Eukaryota	Metazoa	Chordata						NA	11.8657	NA	11.6867	NA	NA	NA	NA	NA	NA	NA	NA	NA	NA	NA	NA	NA	NA	NA	NA	NA	NA	NA	NA
AETECQNAEYQQLLDIK	Mammalia	Class	Eukaryota	Metazoa	Chordata	Mammalia					12.3053	12.2458	10.5536	NA	11.4831	11.2437	9.66922	NA	NA	NA	10.819	NA	NA	11.3305	NA	NA	11.8693	10.0054	11.7011	NA	8.95043	NA	NA	9.95292
AETEEGPDVLR	Chordata	Phylum	Eukaryota	Metazoa	Chordata						11.717	12.1706	11.8707	11.7301	NA	12.6067	NA	NA	NA	NA	NA	NA	11.6537	NA	NA	NA	NA	NA	NA	NA	NA	NA	NA	NA
AETFDHVLTAR	Lachnospiraceae bacterium A2	Species	Bacteria		Firmicutes	Clostridia	Clostridiales	Lachnospiraceae		Lachnospiraceae bacterium A2	NA	NA	10.8999	NA	10.9722	NA	11.3311	NA	NA	NA	NA	NA	NA	10.7799	NA	12.7788	NA	NA	NA	NA	11.1324	NA	NA	NA
AETFTFHSDICTLPEK	Mus musculus	Species	Eukaryota	Metazoa	Chordata	Mammalia	Rodentia	Muridae	Mus	Mus musculus	NA	NA	NA	NA	NA	NA	NA	NA	NA	NA	NA	NA	11.3293	NA	NA	NA	NA	NA	NA	NA	NA	NA	NA	NA
AETFTFHSDICTLPEKEK	Mus musculus	Species	Eukaryota	Metazoa	Chordata	Mammalia	Rodentia	Muridae	Mus	Mus musculus	NA	NA	NA	NA	NA	12.9441	NA	NA	NA	NA	NA	NA	11.3125	NA	NA	NA	NA	NA	9.7935	NA	NA	NA	NA	11.1818
AETINPR	Clostridiales	Order	Bacteria		Firmicutes	Clostridia	Clostridiales				NA	NA	NA	12.4234	NA	14.1994	15.821	NA	NA	NA	NA	NA	NA	NA	NA	14.8405	14.6435	15.2181	13.9688	14.563	NA	14.6042	NA	NA
AETLFTEAEK	Anaerotruncus sp. G3(2012)	Species	Bacteria		Firmicutes	Clostridia	Clostridiales	Ruminococcaceae	Anaerotruncus	Anaerotruncus sp. G3(2012)	11.7464	12.6911	11.5837	12.8279	12.9601	NA	NA	14.1801	13.0319	NA	NA	NA	11.8926	13.1074	12.7922	13.3856	12.4934	12.909	NA	NA	12.8059	13.9248	14.0585	14.8792
AETLYNEIDR	Alistipes putredinis	Species	Bacteria		Bacteroidetes	Bacteroidia	Bacteroidales	Rikenellaceae	Alistipes	Alistipes putredinis	13.2387	14.09	14.5583	14.3652	13.3632	13.0709	12.2635	13.266	13.2078	12.3463	13.7475	11.8817	13.5819	13.4871	13.304	12.3163	13.6166	12.4189	13.2219	12.6966	13.2116	NA	12.7597	13.0514
AETVADELVK	Prevotella	Genus	Bacteria		Bacteroidetes	Bacteroidia	Bacteroidales	Prevotellaceae	Prevotella		NA	NA	13.1389	13.813	NA	NA	NA	NA	NA	NA	NA	NA	12.3393	NA	13.5161	NA	NA	NA	NA	NA	NA	NA	NA	NA
AETVAELKK	Lachnospiraceae	Family	Bacteria		Firmicutes	Clostridia	Clostridiales	Lachnospiraceae			NA	NA	11.7244	NA	NA	13.1438	NA	13.4694	NA	NA	NA	NA	NA	NA	NA	NA	12.9419	12.1701	14.0586	12.1228	NA	NA	12.7971	NA
AETVIQTVK	Mammalia	Class	Eukaryota	Metazoa	Chordata	Mammalia					NA	NA	NA	NA	12.523	NA	NA	NA	NA	NA	NA	NA	NA	NA	NA	NA	NA	NA	NA	NA	NA	NA	NA	NA
AEVAAILYR	Oscillibacter sp. 1-3	Species	Bacteria		Firmicutes	Clostridia	Clostridiales	Oscillospiraceae	Oscillibacter	Oscillibacter sp. 1-3	NA	16.5792	NA	14.0732	14.5041	17.0789	14.3341	15.1271	14.5258	14.289	15.4917	14.2911	NA	14.8518	14.666	NA	13.9728	15.3309	NA	NA	NA	NA	NA	NA
AEVCGNLITLSDR	Anaerotruncus sp. G3(2012)	Species	Bacteria		Firmicutes	Clostridia	Clostridiales	Ruminococcaceae	Anaerotruncus	Anaerotruncus sp. G3(2012)	NA	10.7069	NA	12.1246	12.3623	NA	12.0194	13.0319	NA	NA	NA	NA	NA	12.4689	NA	10.1182	12.0244	NA	12.1766	NA	NA	12.4766	NA	13.2637
AEVDLQGIK	Mammalia	Class	Eukaryota	Metazoa	Chordata	Mammalia					16.0672	17.7028	17.3336	17.3208	15.7222	15.3121	13.6273	15.6932	16.6836	16.6414	16.255	15.4252	16.7245	15.6395	15.7458	16.0972	16.5101	15.3134	16.2533	15.7037	15.4753	15.6024	15.0261	15.4263
AEVESWYQIK	Muridae	Family	Eukaryota	Metazoa	Chordata	Mammalia	Rodentia	Muridae			11.895	NA	NA	NA	NA	12.0597	NA	NA	NA	12.5939	NA	NA	NA	NA	NA	NA	NA	11.7949	NA	NA	11.9474	NA	NA	NA
AEVETVLAQTGK	Mucispirillum schaedleri	Species	Bacteria		Deferribacteres	Deferribacteres	Deferribacterales	Deferribacteraceae	Mucispirillum	Mucispirillum schaedleri	12.9252	12.5928	11.4273	13.0584	13.0551	13.2116	13.4301	13.6913	11.5589	12.8766	13.054	12.517	13.7411	13.0761	13.2184	12.3762	12.5565	13.8584	12.9481	13.4421	NA	12.3002	12.9762	14.7386
AEVIAAMK	Bacteria	Superkingdom	Bacteria								NA	NA	NA	NA	12.7141	NA	NA	NA	NA	NA	13.04	NA	13.2422	NA	13.4038	14.002	NA	13.2719	NA	NA	13.8381	NA	NA	13.2696
AEVIEFNPGFTPDNK	Clostridiales	Order	Bacteria		Firmicutes	Clostridia	Clostridiales				NA	NA	NA	NA	14.3263	NA	14.1291	NA	12.6252	NA	NA	NA	NA	NA	NA	NA	NA	NA	NA	NA	NA	NA	NA	NA
AEVIEYNPGFTPDNK	Clostridiales	Order	Bacteria		Firmicutes	Clostridia	Clostridiales				12.0215	NA	NA	NA	NA	NA	NA	NA	11.3057	NA	NA	NA	12.4005	NA	NA	NA	NA	NA	NA	10.5559	NA	10.2351	11.5293	NA
AEVLSYPER	Mus musculus	Species	Eukaryota	Metazoa	Chordata	Mammalia	Rodentia	Muridae	Mus	Mus musculus	18.0546	18.7744	19.6602	18.8649	17.5307	17.6051	16.2126	17.9562	17.5702	18.5128	17.2685	17.6146	16.9736	17.5255	16.7645	17.8047	18.176	17.9913	17.0828	17.568	17.723	18.2808	17.2284	17.1476
AEVPSGASTGENEAVELR	Bacteria	Superkingdom	Bacteria								15.3041	16.83	14.2678	15.2646	13.0962	11.4787	13.4538	15.5764	12.0172	12.402	15.4427	14.9027	14.7617	13.2393	14.9422	15.1453	15.5947	13.9417	15.3198	15.5243	15.8239	14.6302	14.2961	13.6319
AEVPSGASTGENEAVELRDGGSR	Bacteria	Superkingdom	Bacteria								11.8055	NA	NA	NA	NA	NA	10.6962	NA	NA	NA	12.0611	NA	NA	NA	NA	NA	NA	9.34989	11.4039	10.9478	NA	NA	NA	NA
AEVQTLVSR	Rodentia	Order	Eukaryota	Metazoa	Chordata	Mammalia	Rodentia				13.7423	15.5878	14.9991	15.076	NA	15.1734	NA	12.9064	14.025	14.3828	14.0785	14.2877	14.0028	13.6608	13.4667	14.4651	13.9301	13.8885	NA	13.609	13.3199	14.0214	14.2642	NA
AEVSDVANAVLDGTDATMLSGESANGLYPVK	Bacteria	Superkingdom	Bacteria								NA	10.5097	NA	NA	NA	NA	NA	NA	NA	NA	11.2875	NA	NA	NA	NA	NA	NA	NA	NA	10.5097	NA	NA	NA	NA
AEVSELPNVVR	Mus musculus	Species	Eukaryota	Metazoa	Chordata	Mammalia	Rodentia	Muridae	Mus	Mus musculus	11.4511	13.1045	12.0378	12.5831	NA	13.7554	NA	NA	NA	NA	NA	NA	NA	NA	NA	NA	NA	NA	NA	NA	NA	NA	NA	12.865
AEVTDEKLHVTVR	Mammalia	Class	Eukaryota	Metazoa	Chordata	Mammalia					NA	NA	NA	NA	NA	NA	NA	12.8185	NA	NA	NA	NA	NA	NA	NA	NA	NA	NA	NA	NA	NA	NA	NA	NA
AEVTDVANAVLDGTDATMLSGESANGLYPVK	Lactobacillus	Genus	Bacteria		Firmicutes	Bacilli	Lactobacillales	Lactobacillaceae	Lactobacillus		11.5404	11.076	NA	NA	NA	NA	NA	NA	NA	NA	11.1961	10.8968	NA	NA	NA	NA	NA	9.08044	10.2691	NA	11.3578	NA	NA	NA
AEVVNGDMK	Clostridium sp. MD294	Species	Bacteria		Firmicutes	Clostridia	Clostridiales	Clostridiaceae	Clostridium	Clostridium sp. MD294	13.9888	15.3051	14.1593	NA	14.475	16.1275	15.0453	NA	NA	16.2037	14.3953	NA	NA	14.4407	13.8427	15.6831	14.0062	15.1644	14.576	14.408	NA	14.3815	NA	15.0132
AEVYVLSK	Bacteria	Superkingdom	Bacteria								14.4488	NA	NA	10.676	13.8446	13.9313	14.0343	13.5251	13.2722	11.326	13.2089	NA	13.5043	13.6266	14.3002	12.941	11.8468	NA	12.3433	NA	13.6462	11.7836	13.1824	NA
AEWMVPFNSDDTFMGK	Mus musculus	Species	Eukaryota	Metazoa	Chordata	Mammalia	Rodentia	Muridae	Mus	Mus musculus	NA	NA	NA	10.6334	11.0282	9.95623	NA	NA	9.98178	NA	NA	NA	10.6105	10.7604	12.1875	NA	NA	NA	10.6501	NA	11.0762	NA	NA	NA
AEYALASNADQGFGGAR	Lachnospiraceae bacterium A2	Species	Bacteria		Firmicutes	Clostridia	Clostridiales	Lachnospiraceae		Lachnospiraceae bacterium A2	NA	NA	10.6901	NA	11.4527	11.4626	11.8629	10.9614	NA	NA	NA	NA	NA	11.7383	NA	11.1951	NA	NA	NA	NA	11.812	NA	NA	NA
AEYANCAVILK	Lachnospiraceae bacterium 28-4	Species	Bacteria		Firmicutes	Clostridia	Clostridiales	Lachnospiraceae		Lachnospiraceae bacterium 28-4	NA	13.1283	13.789	NA	12.9724	13.7288	NA	12.6757	14.0737	13.4798	11.7519	NA	NA	13.1509	NA	NA	15.6171	13.1158	12.8688	NA	NA	NA	NA	NA
AEYEALAEQNR	Mammalia	Class	Eukaryota	Metazoa	Chordata	Mammalia					NA	NA	NA	NA	NA	NA	NA	NA	NA	NA	NA	11.6869	NA	NA	NA	NA	NA	NA	NA	NA	NA	NA	NA	NA
AEYFCQR	Clostridiales	Order	Bacteria		Firmicutes	Clostridia	Clostridiales				15.3653	13.7085	14.9989	13.8184	15.5532	14.7104	15.7654	14.9975	15.3758	NA	14.9914	15.1528	15.44	15.6905	13.3656	15.2384	15.867	14.6804	15.4236	15.217	14.9481	14.8764	15.6562	14.0086
AEYFLQR	Bacteria	Superkingdom	Bacteria								NA	NA	NA	NA	15.086	16.0087	14.8856	15.9701	15.624	15.7867	NA	13.7431	14.1244	15.0715	13.9416	14.9477	14.933	15.2488	NA	13.6196	15.0947	15.0286	15.8618	15.1258
AEYIHFTPDFVLGR	Rodentia	Order	Eukaryota	Metazoa	Chordata	Mammalia	Rodentia				13.0295	14.8673	15.0882	16.0722	14.9913	16.9122	13.5519	NA	13.3238	14.4798	13.512	14.0528	16.5633	15.7559	15.9819	13.522	15.8294	14.3361	15.9191	13.8858	14.5915	14.5396	15.2339	14.6925
AEYKNQLGK	Butyrivibrio	Genus	Bacteria		Firmicutes	Clostridia	Clostridiales	Lachnospiraceae	Butyrivibrio		NA	NA	NA	NA	NA	11.337	12.7166	NA	NA	NA	NA	NA	NA	NA	NA	NA	NA	NA	11.1443	NA	NA	NA	NA	NA
AEYLQTWSTLLPNINK	Muridae	Family	Eukaryota	Metazoa	Chordata	Mammalia	Rodentia	Muridae			15.7775	17.3717	16.4535	16.9133	15.6237	15.6845	14.5678	16.3096	15.6695	15.6374	15.1397	15.521	16.4532	15.3875	15.8657	15.5755	16.3861	15.881	16.2206	15.6224	16.5385	15.6145	16.1197	15.3268
AEYPIAIHR	Bacteria	Superkingdom	Bacteria								NA	NA	NA	NA	NA	NA	NA	14.0403	NA	NA	NA	11.8373	12.5706	NA	NA	NA	NA	NA	NA	NA	NA	NA	NA	NA
AEYPIAVDR	Clostridia	Class	Bacteria		Firmicutes	Clostridia					16.3334	14.9986	14.138	14.8428	16.3113	16.5273	17.345	17.8074	16.7462	15.9865	16.3853	17.0345	15.6718	16.3974	16.3742	16.2738	16.4512	16.9875	16.319	16.8953	15.6167	16.6713	15.8572	15.5832
AEYPIAVER	Bacteria	Superkingdom	Bacteria								13.3998	14.0718	12.679	14.4421	15.2983	15.3081	15.8785	15.4463	15.0817	13.8182	15.1868	14.5278	15.4985	15.1723	16.1385	14.5598	15.012	15.1577	15.8614	15.5213	15.0007	14.8149	15.1872	15.1911
AEYPMSVK	Colletotrichum	Genus	Eukaryota	Fungi	Ascomycota	Sordariomycetes	Glomerellales	Glomerellaceae	Colletotrichum		NA	NA	NA	NA	15.0631	NA	15.7332	NA	NA	NA	13.8746	13.9364	15.0485	15.2259	14.6569	15.4146	NA	NA	14.5639	14.1091	13.8833	NA	14.9851	NA
AEYPNWTNVAPDNYYSEQDAEK	Anaerotruncus sp. G3(2012)	Species	Bacteria		Firmicutes	Clostridia	Clostridiales	Ruminococcaceae	Anaerotruncus	Anaerotruncus sp. G3(2012)	NA	NA	NA	NA	NA	9.91807	9.93227	12.0052	10.8124	NA	NA	9.94802	NA	NA	NA	NA	NA	10.4628	10.8522	NA	NA	10.9148	10.1052	11.0621
AFAAEFSQK	Lachnospiraceae	Family	Bacteria		Firmicutes	Clostridia	Clostridiales	Lachnospiraceae			14.4167	14.6716	14.7942	14.9587	14.274	15.4515	15.849	15.2672	15.0917	14.0448	15.2893	14.4233	14.6085	14.5543	16.3183	14.3116	16.3655	15.0175	15.2365	13.8862	15.3572	14.6774	14.103	14.4138
AFADELEENLK	Clostridiales	Order	Bacteria		Firmicutes	Clostridia	Clostridiales				12.5752	12.0609	11.7157	13.887	14.3599	14.2971	13.6276	13.9897	12.7541	11.4637	13.634	12.6329	14.4858	14.0537	13.564	13.7417	12.9011	11.278	13.6285	13.3408	12.3362	13.7099	14.599	14.8098
AFAEEIKPIMPK	Clostridiales	Order	Bacteria		Firmicutes	Clostridia	Clostridiales				NA	NA	NA	NA	NA	11.686	NA	11.4839	NA	NA	NA	10.2209	12.3511	NA	NA	NA	NA	NA	NA	NA	NA	NA	11.1118	12.4519
AFAEVLNNLDVK	Lactobacillus	Genus	Bacteria		Firmicutes	Bacilli	Lactobacillales	Lactobacillaceae	Lactobacillus		13.8995	13.9063	14.4824	13.6935	11.7376	12.1483	11.6193	13.0911	12.7393	13.4628	13.9343	13.6564	11.7143	11.72	11.5573	13.2009	13.4215	12.2119	12.2712	13.9845	12.0099	13.411	11.4375	12.1882
AFAGLLNR	Bacteria	Superkingdom	Bacteria								NA	NA	NA	NA	NA	NA	NA	NA	NA	NA	NA	NA	13.2885	NA	14.5844	13.3113	NA	NA	NA	NA	11.9573	NA	NA	NA
AFALDVINSAHER	Mus musculus	Species	Eukaryota	Metazoa	Chordata	Mammalia	Rodentia	Muridae	Mus	Mus musculus	NA	NA	NA	10.373	NA	NA	NA	NA	NA	NA	NA	NA	NA	NA	NA	NA	NA	9.04694	NA	NA	NA	NA	NA	NA
AFALNFQQTIAGK	Mus musculus	Species	Eukaryota	Metazoa	Chordata	Mammalia	Rodentia	Muridae	Mus	Mus musculus	NA	NA	NA	NA	NA	NA	NA	NA	NA	NA	NA	NA	11.2488	NA	NA	NA	NA	NA	NA	NA	NA	NA	NA	NA
AFAPSYSVDISGGK	Lachnospiraceae bacterium A4	Species	Bacteria		Firmicutes	Clostridia	Clostridiales	Lachnospiraceae		Lachnospiraceae bacterium A4	NA	NA	NA	NA	13.674	13.3382	14.4086	NA	14.6044	13.6454	NA	NA	NA	13.6366	10.8919	11.0344	12.8077	12.4339	NA	NA	NA	14.2602	12.8023	NA
AFAQVDGYEVALCDIK	Clostridiales	Order	Bacteria		Firmicutes	Clostridia	Clostridiales				NA	NA	NA	NA	12.0266	NA	10.5597	11.7605	10.8453	NA	NA	NA	12.1364	12.0061	NA	NA	11.0782	NA	NA	NA	10.5468	NA	11.4861	NA
AFAYFQENAPSAQNDR	Lachnospiraceae bacterium A4	Species	Bacteria		Firmicutes	Clostridia	Clostridiales	Lachnospiraceae		Lachnospiraceae bacterium A4	NA	NA	11.7505	11.2574	14.4011	12.9763	13.7661	NA	11.9744	12.7604	NA	NA	NA	14.7143	10.9742	12.5173	14.7335	13.7416	NA	10.4844	NA	14.6342	12.7604	NA
AFCDDDFK	Clostridiales	Order	Bacteria		Firmicutes	Clostridia	Clostridiales				NA	NA	NA	NA	12.8384	NA	12.6314	11.6692	12.8964	NA	NA	12.9131	NA	12.8164	NA	10.643	12.701	NA	12.0304	12.6211	12.3558	11.5727	12.8515	NA
AFCDDDFKGFDR	Clostridiales	Order	Bacteria		Firmicutes	Clostridia	Clostridiales				NA	NA	NA	NA	14.017	NA	NA	12.6136	NA	NA	NA	13.3964	12.5584	NA	NA	NA	NA	NA	NA	NA	12.5593	NA	14.0877	NA
AFCGFEDPR	Mammalia	Class	Eukaryota	Metazoa	Chordata	Mammalia					NA	11.878	11.0386	11.1416	NA	10.9531	NA	NA	NA	NA	NA	NA	NA	NA	NA	NA	NA	NA	NA	NA	NA	NA	NA	NA
AFCGSLSR	Mus musculus	Species	Eukaryota	Metazoa	Chordata	Mammalia	Rodentia	Muridae	Mus	Mus musculus	12.2094	17.3912	17.0237	13.1575	NA	13.6058	17.4892	18.0115	16.8653	13.0479	17.4327	17.0526	17.4143	NA	NA	17.5511	17.5908	17.7627	11.4118	11.8344	21.9447	17.3555	17.9483	17.7738
AFDADGNPIMNEK	Lachnospiraceae bacterium TWA4	Species	Bacteria		Firmicutes	Clostridia	Clostridiales	Lachnospiraceae		Lachnospiraceae bacterium TWA4	12.5107	NA	NA	NA	14.1143	NA	15.6684	14.3355	12.2597	NA	15.4016	14.442	13.4965	14.2857	15.0444	10.8657	12.2561	13.4097	14.0446	14.2457	13.7283	10.6212	11.555	15.8227
AFDDSYDTPIVAGK	Clostridiales	Order	Bacteria		Firmicutes	Clostridia	Clostridiales				NA	11.2145	10.9414	11.7366	12.4711	13.3473	13.7161	13.7707	12.7336	NA	12.0972	11.708	12.3895	12.2122	12.6664	10.9476	13.4273	12.0553	12.6942	11.391	12.2752	NA	11.4984	12.4518
AFDDSYDTPIVAGKK	Clostridiales	Order	Bacteria		Firmicutes	Clostridia	Clostridiales				NA	NA	NA	NA	NA	11.7932	12.662	12.4486	10.1036	NA	10.0896	10.1436	10.6338	NA	10.3426	NA	NA	10.4021	10.7636	10.3558	NA	NA	NA	10.6646
AFDLAPPEAVPQQK	Rodentia	Order	Eukaryota	Metazoa	Chordata	Mammalia	Rodentia				11.3388	13.0314	13.0894	13.0965	NA	12.4437	NA	NA	11.8245	NA	11.0196	NA	12.3857	NA	12.0761	NA	NA	11.104	12.3106	11.3074	NA	NA	NA	12.216
AFDLEGIDDDFR	Lachnospiraceae bacterium M18-1	Species	Bacteria		Firmicutes	Clostridia	Clostridiales	Lachnospiraceae		Lachnospiraceae bacterium M18-1	NA	NA	NA	NA	12.4195	11.9955	NA	12.3075	12.3127	NA	NA	12.7416	12.7125	12.5086	NA	NA	11.8547	NA	NA	NA	10.6578	13.2805	11.4907	13.5288
AFDLGATGVMTDYPTK	Metazoa	Kingdom	Eukaryota	Metazoa							13.1106	13.6081	12.6867	13.4761	14.3719	12.6439	12.1247	12.8598	12.7307	12.88	12.2088	13.1491	12.8648	13.9984	12.3392	13.4245	14.7286	13.4001	11.4294	12.7448	11.6215	12.8056	13.5582	12.8739
AFDMWAGDVNDLLK	Mammalia	Class	Eukaryota	Metazoa	Chordata	Mammalia					NA	10.6806	NA	9.56886	NA	10.3736	NA	NA	NA	NA	NA	NA	NA	NA	NA	NA	NA	NA	NA	NA	NA	NA	NA	NA
AFDNDVDALCNLR	Mammalia	Class	Eukaryota	Metazoa	Chordata	Mammalia					NA	12.0591	11.5395	12.3322	NA	12.6781	NA	NA	NA	NA	NA	NA	NA	NA	NA	NA	NA	11.1705	11.4025	NA	NA	NA	NA	11.8865
AFDNNLK	Bacteria	Superkingdom	Bacteria								14.1215	13.7183	NA	12.2421	NA	NA	NA	NA	NA	NA	14.2472	NA	NA	NA	NA	NA	NA	12.7427	13.8167	13.9587	13.7113	NA	13.607	NA
AFDQGADAIYEHINEGK	Mammalia	Class	Eukaryota	Metazoa	Chordata	Mammalia					NA	NA	NA	NA	NA	12.4997	NA	11.7407	11.2365	NA	NA	10.8722	11.2179	NA	NA	NA	NA	12.9367	12.0457	10.8827	NA	NA	NA	11.7992
AFDSGIIPMEFVNK	Chordata	Phylum	Eukaryota	Metazoa	Chordata						12.0021	15.5247	14.2553	14.5036	12.3043	13.7707	NA	NA	NA	NA	12.1073	NA	12.5108	11.9847	13.136	NA	11.8364	12.2446	13.1403	11.8438	NA	NA	13.3686	13.0839
AFDTAEGGGQYATGGR	Lachnospiraceae bacterium MD335	Species	Bacteria		Firmicutes	Clostridia	Clostridiales	Lachnospiraceae		Lachnospiraceae bacterium MD335	13.8675	NA	13.8062	NA	15.3248	13.5312	13.8398	12.4917	14.1635	13.8475	13.8659	14.6719	14.8523	15.0255	14.5475	15.7068	15.3355	13.5652	15.031	14.8495	15.6396	14.6653	14.7558	15.0525
AFDTNNNQIEEK	Lachnospiraceae bacterium MD335	Species	Bacteria		Firmicutes	Clostridia	Clostridiales	Lachnospiraceae		Lachnospiraceae bacterium MD335	9.20935	NA	11.4101	NA	NA	9.04158	9.52082	10.334	10.8252	10.8776	10.4033	10.9765	NA	10.0963	NA	NA	11.4459	10.1369	11.4919	11.0911	10.5534	10.2175	NA	NA
AFDVPIEEGPVFR	Mus musculus	Species	Eukaryota	Metazoa	Chordata	Mammalia	Rodentia	Muridae	Mus	Mus musculus	NA	14.4439	14.7424	14.7681	NA	13.5263	NA	12.6402	13.6652	12.0518	12.6621	NA	12.8932	NA	13.2364	NA	NA	13.1307	NA	12.9651	NA	NA	12.7148	NA
AFDVVEDGTFK	Lachnospiraceae bacterium MD335	Species	Bacteria		Firmicutes	Clostridia	Clostridiales	Lachnospiraceae		Lachnospiraceae bacterium MD335	14.9141	NA	13.89	NA	15.5357	13.7992	14.0297	13.767	14.5764	13.3525	15.026	15.5774	15.6634	15.5413	15.257	16.2124	15.4575	14.2324	16.1282	15.9468	14.9835	14.4627	15.4732	15.2261
AFEAGLTPILCCGESLEQR	Clostridiales	Order	Bacteria		Firmicutes	Clostridia	Clostridiales				NA	NA	NA	NA	12.6456	NA	NA	9.84254	NA	NA	NA	11.4589	13.194	12.3026	NA	10.4894	NA	NA	11.1329	11.0575	NA	10.6582	NA	NA
AFEAGLTPILCCGETLEQR	Firmicutes	Phylum	Bacteria		Firmicutes						NA	NA	NA	NA	12.8574	10.7364	11.6435	9.01191	11.6046	NA	11.0618	NA	13.334	12.5024	NA	NA	12.2983	NA	12.3264	NA	NA	NA	12.0556	11.4601
AFEDEMSGR	Chordata	Phylum	Eukaryota	Metazoa	Chordata						12.4459	13.568	12.2904	13.5037	NA	13.5966	NA	NA	10.8317	NA	NA	NA	NA	NA	11.8768	NA	NA	11.9227	12.3165	11.4763	NA	NA	12.3037	12.6592
AFEGLLNR	Firmicutes	Phylum	Bacteria		Firmicutes						13.8902	16.5979	16.9585	16.9946	15.8395	17.5468	14.9284	16.0089	16.448	15.6932	13.6235	14.9148	16.6184	15.6932	16.83	16.1079	15.1642	16.0335	16.3574	13.8642	15.8378	15.3609	16.8104	NA
AFELAGITK	Brucella	Genus	Bacteria		Proteobacteria	Alphaproteobacteria	Rhizobiales	Brucellaceae	Brucella		NA	NA	11.5159	NA	12.1137	NA	12.2545	NA	12.1606	11.718	NA	NA	NA	12.2893	NA	NA	NA	NA	NA	NA	NA	12.1153	12.6658	NA
AFEMLANKR	Mucispirillum schaedleri	Species	Bacteria		Deferribacteres	Deferribacteres	Deferribacterales	Deferribacteraceae	Mucispirillum	Mucispirillum schaedleri	NA	NA	NA	NA	9.89727	NA	NA	NA	NA	NA	NA	NA	NA	NA	11.3836	NA	NA	NA	NA	NA	NA	NA	NA	13.1698
AFEPVAQSAGGAASATGWNK	Lactobacillus	Genus	Bacteria		Firmicutes	Bacilli	Lactobacillales	Lactobacillaceae	Lactobacillus		12.1749	11.2358	NA	NA	NA	NA	NA	11.5996	NA	NA	11.2772	11.4192	9.61468	NA	NA	NA	NA	10.4261	11.4512	10.8544	11.3498	NA	9.99635	NA
AFEYFMESSPAAMNDK	Ruminococcus	Genus	Bacteria		Firmicutes	Clostridia	Clostridiales	Ruminococcaceae	Ruminococcus		NA	NA	NA	NA	NA	NA	NA	NA	NA	NA	NA	NA	12.5734	NA	NA	NA	NA	NA	NA	NA	NA	NA	NA	NA
AFFDQYQPK	Eubacterium plexicaudatum	Species	Bacteria		Firmicutes	Clostridia	Clostridiales	Eubacteriaceae	Eubacterium	Eubacterium plexicaudatum	NA	NA	NA	NA	11.7045	11.5202	NA	11.9339	NA	NA	NA	13.2627	NA	11.8988	10.9181	12.1411	NA	NA	NA	NA	12.3188	13.7389	NA	12.3883
AFFPCFDTPAVK	Mammalia	Class	Eukaryota	Metazoa	Chordata	Mammalia					NA	11.5811	10.5553	10.7492	NA	11.8044	NA	NA	NA	NA	NA	NA	11.7515	NA	NA	NA	NA	NA	11.2854	NA	NA	NA	11.9843	10.2203
AFFSEVER	Metazoa	Kingdom	Eukaryota	Metazoa							11.4426	13.205	12.6949	13.207	NA	13.6726	NA	NA	NA	NA	11.2565	NA	NA	NA	11.8808	NA	NA	NA	12.4894	NA	NA	NA	NA	12.3222
AFFSGSQR	Eukaryota	Superkingdom	Eukaryota								13.8515	14.0502	NA	13.99	NA	15.3214	NA	13.9423	14.3613	14.5481	13.7986	13.9215	NA	NA	12.9175	14.4873	NA	15.595	13.1147	13.4737	NA	NA	13.3843	14.4677
AFFSNSLVELIR	Mus musculus	Species	Eukaryota	Metazoa	Chordata	Mammalia	Rodentia	Muridae	Mus	Mus musculus	NA	9.98504	NA	9.70418	NA	11.1252	NA	NA	NA	NA	NA	NA	11.3572	NA	11.0997	NA	NA	10.4828	10.9828	NA	NA	NA	NA	11.5134
AFGENAVVQLISLQK	Mus musculus	Species	Eukaryota	Metazoa	Chordata	Mammalia	Rodentia	Muridae	Mus	Mus musculus	NA	10.2019	10.0673	10.3159	NA	10.8159	NA	NA	NA	NA	NA	NA	NA	NA	NA	NA	NA	NA	10.2977	NA	NA	NA	NA	10.524
AFGGDNYYVTNYQEMK	Lactobacillus	Genus	Bacteria		Firmicutes	Bacilli	Lactobacillales	Lactobacillaceae	Lactobacillus		11.034	12.1029	NA	NA	NA	NA	11.542	12.2183	NA	NA	11.7566	11.6355	NA	NA	NA	NA	NA	NA	11.8004	11.546	12.3089	NA	10.0773	9.84964
AFGGQFQPK	Mucispirillum schaedleri	Species	Bacteria		Deferribacteres	Deferribacteres	Deferribacterales	Deferribacteraceae	Mucispirillum	Mucispirillum schaedleri	NA	NA	NA	NA	NA	13.382	13.2624	14.2171	NA	13.7112	NA	13.2848	13.5902	12.4727	NA	13.0795	NA	13.924	NA	NA	NA	NA	13.6443	13.9095
AFGGQSLK	Eukaryota	Superkingdom	Eukaryota								14.0517	15.1593	14.7209	14.5875	13.1091	16.7591	NA	NA	NA	14.4449	NA	NA	NA	NA	13.5549	NA	NA	14.4935	14.6073	NA	NA	NA	14.6103	15.6374
AFGNGDVYIEK	Bacteria	Superkingdom	Bacteria								NA	NA	NA	NA	NA	NA	NA	NA	NA	NA	NA	NA	NA	NA	NA	NA	NA	11.6115	NA	NA	NA	NA	NA	NA
AFGPGIEGK	Mammalia	Class	Eukaryota	Metazoa	Chordata	Mammalia					NA	13.8634	13.8734	13.7105	NA	NA	NA	NA	NA	NA	NA	13.685	14.1488	NA	NA	NA	NA	15.083	NA	16.0222	NA	NA	14.2888	NA
AFGSAYVAMNSK	Clostridiales	Order	Bacteria		Firmicutes	Clostridia	Clostridiales				NA	NA	NA	NA	11.7594	NA	NA	NA	NA	NA	NA	NA	NA	11.6971	11.5711	NA	12.6085	NA	12.4323	NA	11.9643	NA	NA	11.5788
AFHDEDPDGNGTK	Lachnospiraceae bacterium MD335	Species	Bacteria		Firmicutes	Clostridia	Clostridiales	Lachnospiraceae		Lachnospiraceae bacterium MD335	NA	NA	NA	NA	11.9151	NA	NA	NA	NA	NA	NA	NA	12.6694	11.9421	12.0865	13.3767	NA	NA	NA	NA	13.1841	12.5896	11.9339	11.4977
AFIANHGIK	Clostridiales	Order	Bacteria		Firmicutes	Clostridia	Clostridiales				NA	NA	NA	NA	NA	NA	NA	14.9687	NA	NA	NA	NA	NA	NA	NA	NA	NA	NA	NA	NA	NA	NA	NA	NA
AFIANHNIK	Clostridiales	Order	Bacteria		Firmicutes	Clostridia	Clostridiales				NA	NA	NA	NA	NA	NA	NA	NA	NA	NA	NA	NA	13.3836	NA	NA	NA	NA	NA	NA	NA	11.9907	NA	NA	NA
AFICPTK	Bacteria	Superkingdom	Bacteria								NA	NA	NA	NA	12.331	12.6996	12.3828	NA	NA	NA	NA	NA	NA	12.4087	NA	12.1896	NA	NA	NA	NA	NA	12.1079	13.0567	12.1977
AFIDIDMTK	Lachnospiraceae bacterium MD335	Species	Bacteria		Firmicutes	Clostridia	Clostridiales	Lachnospiraceae		Lachnospiraceae bacterium MD335	NA	NA	NA	NA	12.5126	NA	NA	NA	NA	NA	12.5147	11.6344	13.0019	12.6403	12.5874	12.2043	12.8201	NA	13.1516	12.3576	12.349	10.4628	13.083	NA
AFIDIDMTKK	Lachnospiraceae bacterium MD335	Species	Bacteria		Firmicutes	Clostridia	Clostridiales	Lachnospiraceae		Lachnospiraceae bacterium MD335	NA	NA	NA	NA	NA	NA	NA	NA	NA	NA	NA	NA	NA	NA	NA	NA	11.2937	NA	13.2402	NA	12.7895	NA	NA	12.5172
AFIDVVTEELK	Clostridiales	Order	Bacteria		Firmicutes	Clostridia	Clostridiales				NA	NA	NA	NA	NA	11.9246	11.8915	10.9288	NA	NA	NA	NA	15.4182	11.9977	13.0822	NA	11.3409	NA	15.0682	NA	NA	NA	12.3848	12.8403
AFIFPQESSTAYVSLIPK	Mus musculus	Species	Eukaryota	Metazoa	Chordata	Mammalia	Rodentia	Muridae	Mus	Mus musculus	18.3427	19.3255	19.2631	19.2376	17.6991	18.0179	16.5457	18.1716	18.7167	19.2145	15.7601	18.1512	17.8084	17.4189	17.9904	17.6158	18.1535	17.687	17.8301	17.2887	18.9141	18.8811	18.7004	16.0496
AFILADPDGSNR	Rodentia	Order	Eukaryota	Metazoa	Chordata	Mammalia	Rodentia				19.4867	20.4975	20.7181	20.0853	18.6306	18.1989	17.9079	18.7066	18.7995	19.4119	18.5208	18.7464	18.3702	18.6208	18.2742	19.3021	19.7957	18.4994	18.6193	18.6908	18.8836	19.4059	18.7061	18.0428
AFILTGEGR	Oscillibacter sp. 1-3	Species	Bacteria		Firmicutes	Clostridia	Clostridiales	Oscillospiraceae	Oscillibacter	Oscillibacter sp. 1-3	14.2406	NA	NA	12.4895	14.8855	NA	14.5652	NA	14.2698	NA	15.2428	NA	15.4482	14.9336	15.5167	13.0603	14.0441	14.7352	15.5046	14.2539	NA	NA	15.4878	12.7933
AFINLEAAGVGGK	Chordata	Phylum	Eukaryota	Metazoa	Chordata						12.9167	13.669	13.2299	NA	12.4829	14.0298	11.8664	13.4753	12.8936	14.0124	13.3042	13.6574	12.8912	12.5739	NA	13.0997	13.7284	14.4391	11.9288	12.9118	12.946	14.1655	13.6304	13.2195
AFINSQLR	Tribolium castaneum	Species	Eukaryota	Metazoa	Arthropoda	Insecta	Coleoptera	Tenebrionidae	Tribolium	Tribolium castaneum	NA	NA	NA	NA	NA	NA	13.9678	NA	NA	NA	NA	NA	NA	NA	NA	NA	11.7006	15.3378	12.9484	13.1017	NA	NA	12.7326	NA
AFIQNLR	Dermabacter sp. HFH0086	Species	Bacteria		Actinobacteria	Actinobacteria	Micrococcales	Dermabacteraceae	Dermabacter	Dermabacter sp. HFH0086	NA	14.2995	13.4815	13.8732	12.7219	12.2792	11.4175	13.7365	13.1629	13.3354	12.4215	NA	12.3936	12.6254	NA	12.4208	12.6814	NA	12.7843	NA	NA	NA	NA	NA
AFITNLYGATIANPEMTEYTANSDAGVQALTK	Anaerotruncus sp. G3(2012)	Species	Bacteria		Firmicutes	Clostridia	Clostridiales	Ruminococcaceae	Anaerotruncus	Anaerotruncus sp. G3(2012)	NA	8.56911	NA	9.31162	8.81833	7.6649	7.06264	9.34621	NA	9.11775	NA	NA	NA	9.14896	9.90347	8.71504	10.0788	9.72771	8.56593	7.91586	NA	8.67632	9.47738	9.45721
AFIVLNPDYK	Mammalia	Class	Eukaryota	Metazoa	Chordata	Mammalia					11.9782	12.3436	11.8737	11.5553	NA	12.8044	NA	NA	NA	NA	NA	10.4191	NA	NA	NA	8.32494	10.4733	12.7082	11.7567	10.8794	NA	NA	10.9901	11.6923
AFIVTDPMMVQLGNVDK	Anaerotruncus sp. G3(2012)	Species	Bacteria		Firmicutes	Clostridia	Clostridiales	Ruminococcaceae	Anaerotruncus	Anaerotruncus sp. G3(2012)	NA	10.7357	9.49883	10.5471	11.3902	9.182	10.8371	11.0792	10.5569	NA	NA	NA	10.7789	10.8203	11.4084	11.2399	10.2972	10.7283	11.9551	11.1401	10.765	10.9375	12.1525	13.6472
AFKETGVK	Bacteria	Superkingdom	Bacteria								13.0792	NA	NA	NA	NA	NA	12.2457	NA	NA	NA	13.2081	NA	NA	NA	NA	NA	NA	NA	13.3209	12.8709	NA	NA	NA	NA
AFLASCYASR	Bacteria	Superkingdom	Bacteria								13.7654	13.7428	12.3783	14.5658	15.1451	14.8353	15.2919	14.5977	14.5447	13.4682	14.7363	13.7822	14.9391	15.2827	12.2547	14.5765	15.0394	14.5026	14.7832	14.5631	14.494	13.972	15.7458	15.1447
AFLDAGKTER	Bacteria	Superkingdom	Bacteria								NA	NA	NA	NA	12.8458	12.7941	13.3045	NA	NA	NA	11.5439	NA	NA	NA	12.1904	12.6003	12.9644	NA	11.978	NA	NA	NA	NA	12.9228
AFLEALQNQAETSSK	Rodentia	Order	Eukaryota	Metazoa	Chordata	Mammalia	Rodentia				NA	NA	NA	NA	NA	NA	NA	NA	NA	NA	NA	NA	NA	NA	NA	NA	NA	NA	NA	NA	NA	NA	NA	10.2838
AFLEENQLDYIIR	Rodentia	Order	Eukaryota	Metazoa	Chordata	Mammalia	Rodentia				NA	NA	NA	10.0565	NA	10.2284	NA	NA	NA	NA	NA	NA	9.76284	NA	NA	NA	NA	NA	NA	NA	NA	NA	NA	NA
AFLEGAELVNEVK	Anaerotignum neopropionicum	Species	Bacteria		Firmicutes	Clostridia	Clostridiales	Lachnospiraceae	Anaerotignum	Anaerotignum neopropionicum	NA	NA	NA	10.9227	11.8829	11.1684	11.653	10.9508	NA	NA	11.2606	NA	NA	11.3467	11.4231	9.81418	NA	NA	NA	NA	NA	10.0995	12.8795	13.2076
AFLIEEQK	Eukaryota	Superkingdom	Eukaryota								14.2337	15.9988	15.8298	15.9978	13.9824	14.7149	NA	14.2865	13.9535	14.1396	14.2279	14.2473	14.2446	13.9281	14.3757	13.8692	14.5823	13.7521	14.4341	14.1357	NA	14.2591	14.2353	14.7408
AFLNGEVR	Clostridiales	Order	Bacteria		Firmicutes	Clostridia	Clostridiales				13.8231	NA	NA	NA	14.7954	14.4222	16.1921	14.5874	NA	NA	NA	NA	15.6716	14.8625	NA	14.6164	NA	NA	14.36	NA	14.4282	NA	17.1212	15.5823
AFLPVMMK	Mammalia	Class	Eukaryota	Metazoa	Chordata	Mammalia					NA	NA	NA	NA	NA	11.3262	NA	NA	10.961	NA	10.1232	10.4273	10.2321	NA	NA	NA	NA	NA	10.6031	NA	NA	NA	11.0232	NA
AFLTLAEDILR	Chordata	Phylum	Eukaryota	Metazoa	Chordata						NA	NA	NA	NA	9.78803	11.7239	NA	10.4387	NA	NA	NA	NA	11.8707	NA	10.4132	NA	NA	9.35326	11.124	9.55196	NA	NA	11.8115	11.6059
AFLVVQQNLEADK	Clostridium sp. MD294	Species	Bacteria		Firmicutes	Clostridia	Clostridiales	Clostridiaceae	Clostridium	Clostridium sp. MD294	NA	NA	NA	NA	NA	NA	10.1126	NA	NA	NA	NA	NA	NA	NA	NA	NA	NA	NA	NA	NA	NA	NA	NA	10.974
AFLVVQQNLEADKK	Clostridium sp. MD294	Species	Bacteria		Firmicutes	Clostridia	Clostridiales	Clostridiaceae	Clostridium	Clostridium sp. MD294	NA	NA	NA	NA	11.6329	11.9465	11.5789	NA	NA	NA	NA	NA	11.5998	11.8512	11.5511	9.98543	10.4136	NA	NA	NA	11.7371	NA	12.081	11.6868
AFLYEQTESVVK	Mus musculus	Species	Eukaryota	Metazoa	Chordata	Mammalia	Rodentia	Muridae	Mus	Mus musculus	NA	NA	11.0701	NA	NA	NA	NA	NA	NA	NA	NA	NA	NA	NA	NA	NA	NA	NA	NA	NA	NA	NA	NA	NA
AFMDGQETIESLEER	Hungatella hathewayi	Species	Bacteria		Firmicutes	Clostridia	Clostridiales	Clostridiaceae	Hungatella	Hungatella hathewayi	NA	NA	NA	NA	NA	10.9931	NA	NA	NA	NA	NA	NA	NA	NA	NA	NA	NA	NA	NA	NA	NA	NA	NA	NA
AFMDQDFILQTQTASDLYHK	Lachnospiraceae bacterium MD335	Species	Bacteria		Firmicutes	Clostridia	Clostridiales	Lachnospiraceae		Lachnospiraceae bacterium MD335	NA	NA	NA	NA	10.3845	NA	NA	NA	NA	NA	NA	NA	NA	11.0098	10.154	10.6575	11.9093	NA	11.3063	NA	NA	NA	NA	10.3334
AFMPYGGIK	Bacteria	Superkingdom	Bacteria								11.7947	15.0195	14.2612	14.9432	14.974	14.5364	13.5569	NA	14.8351	13.8612	12.3745	NA	15.5783	14.7501	13.9002	15.7872	12.9894	14.1658	16.2124	14.2138	13.6607	13.9393	15.6709	NA
AFNEDSNTPIMR	Clostridiales	Order	Bacteria		Firmicutes	Clostridia	Clostridiales				13.8188	NA	NA	NA	NA	NA	13.2676	NA	11.7527	NA	12.8951	13.7761	13.7636	12.2546	12.1227	11.4871	NA	NA	13.8823	14.0392	NA	NA	12.5193	NA
AFNPKEVLVR	Mus musculus	Species	Eukaryota	Metazoa	Chordata	Mammalia	Rodentia	Muridae	Mus	Mus musculus	NA	NA	NA	NA	NA	NA	NA	9.35737	NA	NA	NA	NA	NA	NA	NA	NA	NA	NA	NA	NA	NA	NA	NA	NA
AFPSYFSK	Mus musculus	Species	Eukaryota	Metazoa	Chordata	Mammalia	Rodentia	Muridae	Mus	Mus musculus	NA	14.3653	13.796	14.1546	11.9991	14.8769	NA	NA	NA	NA	12.2515	NA	NA	12.054	12.7624	NA	NA	NA	13.2186	NA	NA	NA	NA	13.7133
AFPYPCYDEYTR	Mus musculus	Species	Eukaryota	Metazoa	Chordata	Mammalia	Rodentia	Muridae	Mus	Mus musculus	11.2976	NA	NA	10.9502	NA	11.3972	NA	11.4687	NA	NA	NA	10.6941	12.192	NA	NA	NA	NA	NA	10.0758	11.8851	11.4677	NA	10.7317	NA
AFQGLLDSYSVR	Mammalia	Class	Eukaryota	Metazoa	Chordata	Mammalia					NA	11.4414	NA	NA	NA	NA	NA	NA	NA	NA	NA	NA	NA	NA	NA	NA	NA	NA	NA	NA	NA	NA	NA	NA
AFQGLLNR	Clostridiales	Order	Bacteria		Firmicutes	Clostridia	Clostridiales				NA	NA	NA	NA	NA	NA	12.0298	NA	NA	NA	NA	NA	NA	12.0342	11.93	NA	NA	NA	NA	NA	NA	NA	NA	NA
AFQGLYNR	Bacteria	Superkingdom	Bacteria								14.8049	13.8451	12.9853	14.0211	15.1273	16.5518	16.2241	14.8883	15.0636	14.731	13.7479	15.1812	14.935	15.1025	15.6096	15.0426	14.1435	15.7698	15.1257	15.2156	15.5425	13.5483	NA	16.1267
AFQGTEFEGLVESLK	Lachnospiraceae bacterium MD335	Species	Bacteria		Firmicutes	Clostridia	Clostridiales	Lachnospiraceae		Lachnospiraceae bacterium MD335	11.1532	NA	10.8573	NA	13.1295	10.743	11.1986	NA	11.3637	10.9306	11.6854	12.1574	13.7577	12.9814	12.4575	13.0255	12.8588	NA	13.651	12.8179	12.9002	11.5521	13.3876	12.6086
AFQINTFNLK	Mus musculus	Species	Eukaryota	Metazoa	Chordata	Mammalia	Rodentia	Muridae	Mus	Mus musculus	10.6938	11.6019	11.1437	11.8659	11.8066	12.1181	NA	11.6279	12.1084	11.2905	10.793	11.4844	12.9772	11.7652	11.626	11.5618	11.8331	12.1947	10.9274	11.1159	11.2353	11.2095	12.385	11.5917
AFQNVIAPR	Mus musculus	Species	Eukaryota	Metazoa	Chordata	Mammalia	Rodentia	Muridae	Mus	Mus musculus	NA	NA	NA	NA	14.6243	14.6855	12.2154	14.6716	13.7946	13.0474	13.1839	14.6726	13.9901	14.5434	14.6788	14.2991	NA	14.2565	14.2445	14.6559	14.4258	14.251	14.6236	13.6229
AFSDLDGIGSVLGGR	Mus musculus	Species	Eukaryota	Metazoa	Chordata	Mammalia	Rodentia	Muridae	Mus	Mus musculus	12.3351	13.5749	13.8949	14.4493	12.2682	13.7974	11.6226	12.6726	13.188	12.5639	12.7089	12.403	13.5529	12.8564	12.9279	NA	11.8098	12.5929	13.2409	12.6103	12.0601	NA	13.3137	13.4756
AFSDPFVEAEK	Mammalia	Class	Eukaryota	Metazoa	Chordata	Mammalia					11.6536	13.4154	12.3056	12.642	NA	12.642	NA	NA	NA	NA	NA	NA	NA	NA	NA	NA	NA	NA	NA	NA	NA	NA	NA	NA
AFSEEGLK	Salmonella	Genus	Bacteria		Proteobacteria	Gammaproteobacteria	Enterobacterales	Enterobacteriaceae	Salmonella		13.5002	12.0923	12.9644	11.9812	14.3702	13.8554	14.2192	NA	NA	13.1795	13.953	NA	14.1417	14.4682	15.408	13.1365	13.583	13.8234	14.9533	13.7833	NA	12.4834	NA	14.7579
AFSEYAIPCLPNFTIIPK	Lachnospiraceae bacterium MD335	Species	Bacteria		Firmicutes	Clostridia	Clostridiales	Lachnospiraceae		Lachnospiraceae bacterium MD335	NA	NA	NA	NA	NA	NA	NA	NA	NA	NA	NA	NA	12.1823	NA	NA	NA	9.2512	NA	11.5115	NA	NA	NA	NA	NA
AFSGLTQNPESIELR	Chordata	Phylum	Eukaryota	Metazoa	Chordata						NA	11.6973	11.8928	11.7742	NA	NA	NA	NA	NA	NA	NA	NA	NA	NA	NA	NA	NA	NA	NA	NA	NA	NA	NA	NA
AFSGYLGPDESK	Mus musculus	Species	Eukaryota	Metazoa	Chordata	Mammalia	Rodentia	Muridae	Mus	Mus musculus	11.9793	13.5705	12.9252	13.1832	NA	13.6776	NA	12.2564	12.5332	11.9572	12.442	12.0288	13.4114	11.1385	13.6845	NA	11.184	12.9738	12.8993	12.2163	11.5732	NA	13.3342	13.1077
AFSLAIDR	Bacteria	Superkingdom	Bacteria								NA	11.9074	12.3612	11.6517	12.8467	14.2182	13.6749	14.0163	13.6517	11.6952	13.8461	12.6578	12.0139	12.5452	13.5958	12.6596	13.6543	14.0975	13.8028	13.0217	12.2532	12.432	12.7008	12.9485
AFSLIPGK	Bacteria	Superkingdom	Bacteria								NA	NA	9.87319	11.6552	NA	NA	NA	NA	NA	NA	NA	11.0282	NA	NA	NA	11.9614	NA	NA	NA	NA	NA	NA	10.9991	NA
AFSPTTVNTGR	Eukaryota	Superkingdom	Eukaryota								13.4524	13.5066	13.1983	13.2744	13.0694	14.0508	NA	14.5645	12.2496	13.7556	12.678	12.9758	NA	NA	12.126	NA	11.6761	13.9953	12.9571	12.8697	13.1315	13.1596	11.6069	13.7409
AFSVFLFNTENK	Chordata	Phylum	Eukaryota	Metazoa	Chordata						NA	NA	NA	NA	NA	10.411	NA	NA	NA	NA	NA	NA	10.3763	10.4242	NA	NA	NA	NA	NA	NA	NA	NA	NA	NA
AFTDIVADELK	Ruminococcus	Genus	Bacteria		Firmicutes	Clostridia	Clostridiales	Ruminococcaceae	Ruminococcus		13.6867	NA	13.134	NA	11.8133	NA	NA	NA	13.0117	NA	11.6842	NA	12.4535	12.2039	13.9378	NA	11.6409	NA	13.9249	NA	NA	NA	13.4492	NA
AFTDIVADELKK	Ruminococcus	Genus	Bacteria		Firmicutes	Clostridia	Clostridiales	Ruminococcaceae	Ruminococcus		NA	NA	NA	NA	NA	NA	NA	NA	NA	NA	NA	11.5811	NA	NA	11.2109	NA	NA	NA	NA	NA	NA	NA	NA	NA
AFTDVIAEELK	Lachnospiraceae	Family	Bacteria		Firmicutes	Clostridia	Clostridiales	Lachnospiraceae			13.051	12.5158	NA	11.7204	11.79	13.938	NA	11.735	11.9769	NA	11.5286	NA	NA	12.0535	12.065	12.6778	11.0704	12.3124	14.0594	11.6303	11.9273	14.4358	12.5578	15.3003
AFTDVIAEELKK	Lachnospiraceae	Family	Bacteria		Firmicutes	Clostridia	Clostridiales	Lachnospiraceae			NA	NA	NA	NA	NA	NA	NA	NA	NA	NA	NA	NA	NA	9.49396	NA	NA	NA	NA	10.5157	NA	NA	NA	11.1547	11.9167
AFTDVLDR	Lachnospiraceae bacterium MD335	Species	Bacteria		Firmicutes	Clostridia	Clostridiales	Lachnospiraceae		Lachnospiraceae bacterium MD335	NA	NA	13.3956	NA	13.0639	NA	NA	12.4129	12.9049	12.7637	NA	13.3351	12.7717	13.2016	12.455	13.9766	14.1708	12.5065	13.0735	12.8992	13.7728	12.8247	13.2337	NA
AFTDVVADELK	Clostridiales	Order	Bacteria		Firmicutes	Clostridia	Clostridiales				13.3385	12.8638	12.2618	12.0133	13.7594	13.2837	13.1362	12.6436	13.2753	11.4049	14.7182	13.5284	13.4837	13.7802	13.2068	13.0142	13.2611	14.0055	16.8322	13.7901	13.2488	12.5865	13.9623	13.3355
AFTDVVADELKK	Clostridiales	Order	Bacteria		Firmicutes	Clostridia	Clostridiales				14.0362	12.9568	13.74	13.9286	16.1213	16.0042	14.9264	14.2801	14.7304	13.9612	14.831	15.3161	16.3971	16.6383	15.2574	15.2269	14.5091	13.9626	16.8011	15.3399	13.9759	14.1998	15.0869	14.9704
AFTDVVAEELK	Clostridiales	Order	Bacteria		Firmicutes	Clostridia	Clostridiales				14.7113	14.5444	14.0457	14.0508	15.2944	13.9454	15.5321	14.6249	14.2612	13.0949	14.4282	12.5547	14.4485	15.3157	14.8202	14.462	14.431	13.1544	15.4873	13.5107	14.9891	14.0131	15.1738	14.9571
AFTDVVAEELKK	Clostridiales	Order	Bacteria		Firmicutes	Clostridia	Clostridiales				10.5548	10.4757	9.90025	10.4725	12.9056	12.1603	11.6398	11.752	10.5598	NA	10.7358	NA	14.9954	13.0267	15.1961	11.6472	12.6715	NA	12.1021	NA	11.433	NA	12.3105	11.3787
AFTDVVTEELK	Clostridium	Genus	Bacteria		Firmicutes	Clostridia	Clostridiales	Clostridiaceae	Clostridium		NA	NA	NA	12.6448	12.5374	12.7951	11.9821	NA	NA	NA	NA	NA	12.7897	12.5297	12.5227	11.5875	12.4398	11.3544	12.6006	NA	11.8449	12.4416	12.3004	14.9316
AFTDVVTEELKK	Clostridium	Genus	Bacteria		Firmicutes	Clostridia	Clostridiales	Clostridiaceae	Clostridium		NA	NA	NA	NA	9.90719	NA	NA	NA	NA	NA	10.0367	NA	NA	9.76526	10.746	NA	NA	NA	NA	NA	NA	NA	NA	11.5461
AFTDVVTEELQK	Eubacterium sp. 14-2	Species	Bacteria		Firmicutes	Clostridia	Clostridiales	Eubacteriaceae	Eubacterium	Eubacterium sp. 14-2	NA	NA	NA	NA	NA	NA	NA	NA	NA	NA	NA	NA	NA	NA	NA	NA	13.0913	NA	NA	NA	NA	NA	NA	NA
AFTGFIVEADTPGIHIGK	Rodentia	Order	Eukaryota	Metazoa	Chordata	Mammalia	Rodentia				NA	NA	NA	NA	NA	10.9355	NA	NA	NA	NA	NA	NA	NA	NA	NA	NA	9.81545	NA	NA	NA	NA	NA	NA	NA
AFTTWTANAGIEECR	Rodentia	Order	Eukaryota	Metazoa	Chordata	Mammalia	Rodentia				NA	10.85	NA	NA	NA	11.7567	NA	NA	NA	NA	NA	NA	NA	NA	NA	NA	NA	NA	NA	NA	NA	NA	NA	11.0014
AFTYALK	Firmicutes	Phylum	Bacteria		Firmicutes						14.2095	NA	10.5782	NA	14.3404	12.7655	15.0144	13.3665	14.4825	12.3458	14.0605	16.0413	13.5116	14.4272	14.0593	12.384	13.0066	13.1535	14.2917	14.5291	12.176	13.022	13.6868	NA
AFVCSDPDLIK	Firmicutes	Phylum	Bacteria		Firmicutes						12.5037	11.2839	NA	12.4281	13.4474	13.0364	13.9925	13.5089	13.2191	11.3061	13.2397	12.9651	13.125	13.8947	11.3006	12.3927	13.6176	14.1357	13.8663	13.0333	12.3492	13.2838	13.2725	13.249
AFVCSDPDLLK	Faecalibacterium prausnitzii	Species	Bacteria		Firmicutes	Clostridia	Clostridiales	Ruminococcaceae	Faecalibacterium	Faecalibacterium prausnitzii	NA	NA	NA	NA	NA	NA	NA	NA	NA	NA	NA	NA	NA	NA	NA	11.8439	13.42	NA	NA	NA	NA	NA	NA	NA
AFVCSDPDLVK	Bacteria	Superkingdom	Bacteria								15.7258	NA	12.5118	12.3278	15.3291	14.1285	16.0423	14.1287	13.9827	12.5086	15.0225	15.4748	14.7093	15.5686	12.6068	15.0378	14.672	14.4228	15.0423	16.0723	14.2101	15.0176	15.5001	13.9038
AFVDGAELVNQVK	Clostridium sp. MD294	Species	Bacteria		Firmicutes	Clostridia	Clostridiales	Clostridiaceae	Clostridium	Clostridium sp. MD294	12.8534	13.5196	12.5324	13.3613	13.6174	15.1758	14.1552	13.9081	13.5969	13.3562	13.0604	13.4146	12.2451	13.9127	13.44	14.6195	13.0538	13.6411	13.9513	14.1292	11.9723	12.2598	12.75	14.5254
AFVDSCLQLHETK	Mammalia	Class	Eukaryota	Metazoa	Chordata	Mammalia					NA	NA	NA	NA	NA	12.7696	NA	NA	NA	NA	NA	10.4129	12.3207	NA	NA	NA	NA	NA	NA	NA	NA	NA	13.4514	12.4794
AFVDWQIDIANEK	Bacteria	Superkingdom	Bacteria								NA	NA	NA	NA	NA	NA	NA	NA	NA	NA	NA	NA	9.95716	NA	NA	NA	NA	NA	NA	NA	NA	NA	NA	NA
AFVDYFIDIANEK	Clostridiales	Order	Bacteria		Firmicutes	Clostridia	Clostridiales				NA	NA	NA	NA	13.1524	10.1725	12.3683	9.90141	11.8645	NA	11.5202	11.0617	13.825	13.4809	12.8575	11.9305	12.3838	10.6253	13.5104	12.5088	12.0334	11.7749	12.9309	12.7774
AFVEAQNK	Eukaryota	Superkingdom	Eukaryota								NA	NA	NA	13.7269	NA	NA	NA	NA	NA	13.3097	NA	NA	NA	NA	NA	NA	NA	14.1441	NA	NA	NA	NA	13.7269	NA
AFVEFLTDEIKEEK	Rodentia	Order	Eukaryota	Metazoa	Chordata	Mammalia	Rodentia				NA	NA	10.5872	10.3009	NA	10.9759	NA	NA	NA	NA	NA	NA	10.9753	NA	NA	NA	10.3443	NA	NA	NA	NA	NA	NA	9.90512
AFVENFK	Bacilli	Class	Bacteria		Firmicutes	Bacilli					12.1545	NA	NA	NA	13.1094	NA	12.7271	NA	NA	NA	NA	NA	NA	13.1773	13.3325	10.2366	11.1898	NA	13.2224	NA	NA	11.624	NA	NA
AFVENITVLENSLVFK	Mus musculus	Species	Eukaryota	Metazoa	Chordata	Mammalia	Rodentia	Muridae	Mus	Mus musculus	NA	NA	NA	NA	9.36363	NA	NA	NA	NA	NA	NA	NA	10.3772	NA	NA	NA	NA	NA	NA	NA	8.9507	NA	NA	NA
AFVEVITEELK	Lachnospiraceae bacterium M18-1	Species	Bacteria		Firmicutes	Clostridia	Clostridiales	Lachnospiraceae		Lachnospiraceae bacterium M18-1	NA	NA	NA	NA	NA	15.8288	NA	14.1151	NA	NA	NA	11.4942	14.4553	13.9751	14.5872	NA	NA	NA	13.8428	NA	NA	NA	12.1209	NA
AFVEVNEEGTEAAAATAGMMTVR	Mus musculus	Species	Eukaryota	Metazoa	Chordata	Mammalia	Rodentia	Muridae	Mus	Mus musculus	12.4415	12.7502	12.985	12.2708	NA	12.8527	11.8425	13.774	NA	11.8365	11.6667	11.7401	10.6328	NA	11.6547	NA	12.4645	12.5326	NA	11.8097	12.4005	NA	11.7752	11.9355
AFVNDVTK	Clostridiales	Order	Bacteria		Firmicutes	Clostridia	Clostridiales				NA	NA	NA	NA	NA	NA	NA	NA	NA	NA	NA	17.2233	NA	NA	NA	NA	NA	NA	NA	15.2099	NA	15.6721	NA	NA
AFVNEVTK	Clostridiales	Order	Bacteria		Firmicutes	Clostridia	Clostridiales				NA	NA	13.9264	NA	14.8418	NA	15.7065	NA	15.4669	NA	NA	NA	14.6934	14.8802	15.9403	14.1356	14.9231	14.7639	NA	NA	14.8431	NA	NA	NA
AFVPLSEMAGYSNDLR	Anaerotruncus sp. G3(2012)	Species	Bacteria		Firmicutes	Clostridia	Clostridiales	Ruminococcaceae	Anaerotruncus	Anaerotruncus sp. G3(2012)	NA	NA	NA	NA	NA	NA	NA	NA	NA	NA	NA	NA	NA	NA	NA	NA	NA	NA	NA	NA	NA	NA	NA	13.9889
AFYEHAPK	Muridae	Family	Eukaryota	Metazoa	Chordata	Mammalia	Rodentia	Muridae			NA	NA	NA	NA	NA	NA	NA	12.8304	12.9207	NA	NA	13.0317	NA	NA	NA	NA	NA	NA	NA	NA	13.2319	NA	14.337	NA
AFYLEQVK	Lachnospiraceae bacterium A2	Species	Bacteria		Firmicutes	Clostridia	Clostridiales	Lachnospiraceae		Lachnospiraceae bacterium A2	NA	NA	11.0034	NA	12.9334	14.2657	14.6754	NA	NA	NA	NA	NA	NA	12.9115	NA	13.3382	NA	NA	NA	12.553	NA	NA	11.8092	NA
AFYNDFER	Chordata	Phylum	Eukaryota	Metazoa	Chordata						NA	NA	NA	NA	NA	NA	11.216	NA	11.0346	12.6138	NA	11.7328	11.5521	NA	NA	NA	NA	NA	NA	NA	12.4537	NA	11.7425	NA
AFYNDKK	Bacteria	Superkingdom	Bacteria								NA	NA	NA	NA	NA	NA	NA	NA	NA	NA	NA	NA	NA	NA	NA	NA	NA	NA	12.7565	NA	NA	NA	NA	NA
AFYNNVLGEYEEYITK	Metazoa	Kingdom	Eukaryota	Metazoa							NA	11.6853	13.7551	NA	13.9395	12.3898	NA	11.7137	11.2877	14.1255	NA	NA	12.6966	13.7318	NA	NA	NA	NA	11.1306	NA	NA	NA	11.5349	11.4482
AGAANIVPNSTGAAK	Bacteria	Superkingdom	Bacteria								18.1425	17.6702	17.6314	17.8362	19.6511	19.6507	20.5169	19.183	19.4283	17.856	19.5478	18.7416	19.7044	19.7834	19.8843	18.7206	19.2478	20.0723	19.8345	19.1501	18.4701	19.0969	19.1951	19.4706
AGAATFTIK	Lachnospiraceae bacterium MD335	Species	Bacteria		Firmicutes	Clostridia	Clostridiales	Lachnospiraceae		Lachnospiraceae bacterium MD335	NA	NA	NA	NA	NA	NA	NA	NA	NA	NA	NA	NA	12.0432	NA	12.0292	NA	12.1659	NA	12.2401	NA	11.3405	11.6893	NA	NA
AGAAVAQIYVADK	Lachnospiraceae bacterium A4	Species	Bacteria		Firmicutes	Clostridia	Clostridiales	Lachnospiraceae		Lachnospiraceae bacterium A4	NA	NA	11.0951	NA	12.2786	NA	12.4364	NA	NA	NA	NA	NA	NA	12.4588	13.3108	12.5221	NA	NA	NA	NA	NA	10.8643	NA	NA
AGAAWGVEGLADGATTADLFNALCEK	Eubacterium sp. 14-2	Species	Bacteria		Firmicutes	Clostridia	Clostridiales	Eubacteriaceae	Eubacterium	Eubacterium sp. 14-2	NA	NA	NA	NA	NA	NA	NA	NA	NA	NA	NA	NA	NA	NA	NA	NA	10.8602	NA	NA	NA	NA	NA	10.6538	NA
AGAAYVSPFLGR	Bacteria	Superkingdom	Bacteria								13.1847	13.0526	NA	13.7503	15.722	13.3701	15.9889	15.5837	16.435	14.207	14.521	17.0993	15.668	15.5078	17.1294	16.6254	16.4328	15.2402	14.6649	16.0185	15.9416	16.9131	14.5944	14.0075
AGACNIVPNSTGAAK	Bacteria	Superkingdom	Bacteria								16.3721	15.4021	15.2907	14.538	17.036	16.9154	16.7795	16.5557	16.6784	15.3182	16.4082	14.7868	18.741	17.0918	15.5093	15.4005	17.7469	17.1868	18.6192	16.9805	16.9559	15.7326	18.242	17.4632
AGADATNDLTYLLMDAVR	Collinsella tanakaei	Species	Bacteria		Actinobacteria	Coriobacteriia	Coriobacteriales	Coriobacteriaceae	Collinsella	Collinsella tanakaei	NA	10.1073	NA	11.9207	12.1082	13.1482	13.3775	12.3199	NA	NA	12.0074	NA	NA	12.4682	NA	10.5311	12.5178	NA	12.8194	NA	12.5382	11.7142	NA	11.8274
AGADGLLVVTPYYNK	Clostridiales	Order	Bacteria		Firmicutes	Clostridia	Clostridiales				14.3676	13.2584	14.0002	13.5434	15.1308	15.2941	15.5004	14.7694	14.8683	14.4861	14.0757	11.66	14.4909	15.2005	14.4399	14.5323	14.0897	14.8139	13.3812	12.6597	12.9313	14.9183	15.1104	15.2235
AGADIATVPYK	Firmicutes	Phylum	Bacteria		Firmicutes						13.6121	11.9529	12.883	12.9691	13.8689	13.0917	14.5059	13.9709	13.2449	11.7239	13.5696	13.7261	14.0914	13.6804	15.1943	13.4629	13.9475	14.5911	14.521	14.3078	13.7753	13.7279	13.8035	12.6517
AGAEQLDSWLTDEER	Muridae	Family	Eukaryota	Metazoa	Chordata	Mammalia	Rodentia	Muridae			NA	NA	NA	NA	NA	9.97055	NA	NA	NA	NA	NA	NA	NA	NA	NA	NA	NA	NA	NA	NA	NA	NA	NA	NA
AGAESANYPFCTIDPNVGVVTVPDER	Clostridiales	Order	Bacteria		Firmicutes	Clostridia	Clostridiales				NA	NA	NA	NA	10.6791	10.474	10.9536	10.1905	NA	NA	10.1487	9.01617	10.2274	10.8308	9.15236	NA	NA	NA	10.8142	NA	NA	NA	11.1739	10.3934
AGAEYFQTQAVYEPEK	Oxobacter pfennigii	Species	Bacteria		Firmicutes	Clostridia	Clostridiales	Clostridiaceae	Oxobacter	Oxobacter pfennigii	NA	10.1767	NA	NA	11.802	NA	12.8052	NA	8.93083	NA	NA	NA	11.1525	11.5798	13.2	9.82165	8.99014	NA	12.6736	10.832	NA	NA	12.3656	10.8722
AGAFAPDIAWR	Dorea sp. 5-2	Species	Bacteria		Firmicutes	Clostridia	Clostridiales	Lachnospiraceae	Dorea	Dorea sp. 5-2	NA	NA	NA	NA	NA	NA	NA	16.1097	NA	15.4605	NA	13.2639	NA	NA	NA	NA	NA	NA	16.3852	14.1415	NA	NA	NA	NA
AGAGSATLSMAYAGAR	Eukaryota	Superkingdom	Eukaryota								14.1908	15.9108	15.3391	15.3541	13.67	15.795	12.2365	13.7134	13.8624	13.6591	13.0755	13.5486	13.9256	14.02	14.4838	13.5226	13.5658	14.5681	13.8184	13.891	13.4237	13.7526	14.373	14.5248
AGAGTNFAK	Firmicutes bacterium ASF500	Species	Bacteria		Firmicutes					Firmicutes bacterium ASF500	NA	NA	NA	NA	13.8126	NA	NA	NA	NA	NA	NA	NA	NA	13.471	NA	NA	NA	NA	NA	NA	NA	NA	NA	NA
AGAGTNNIPLEK	Lachnospiraceae bacterium MD335	Species	Bacteria		Firmicutes	Clostridia	Clostridiales	Lachnospiraceae		Lachnospiraceae bacterium MD335	NA	NA	10.6477	NA	12.8648	NA	NA	NA	NA	NA	11.3632	NA	12.9416	12.6279	13.1909	11.7849	11.2193	NA	13.6814	11.3775	NA	NA	11.5931	12.9976
AGAGVNNIPLEK	Bacteria	Superkingdom	Bacteria								13.2568	12.6583	13.1031	12.7303	14.5943	13.6085	15.0524	14.1923	13.6496	NA	13.4487	11.7252	15.7124	14.6581	15.6441	12.8461	12.6641	12.4926	14.6061	12.422	13.1192	11.1219	15.7448	13.6817
AGAIAPCEVTVPAQNTGLGPEK	Metazoa	Kingdom	Eukaryota	Metazoa							8.94436	11.3387	10.2962	11.1422	9.12269	10.2667	NA	NA	9.49605	NA	9.57308	NA	9.87606	8.80407	6.5438	NA	NA	8.70843	10.452	8.69317	NA	NA	9.16737	10.4429
AGAINIVPNSTGAAK	Bacteria	Superkingdom	Bacteria								14.4758	16.3414	12.8186	14.516	17.2502	13.0167	14.3618	16.9494	15.3976	13.7246	17.7319	18.1163	16.8088	17.3698	15.4645	15.3184	16.5196	18.751	18.4606	17.0563	18.741	17.8847	17.9715	17.4023
AGAIQPVLNIADK	Clostridiaceae	Family	Bacteria		Firmicutes	Clostridia	Clostridiales	Clostridiaceae			NA	NA	NA	NA	NA	NA	NA	NA	NA	NA	NA	NA	10.8775	NA	NA	NA	NA	NA	NA	NA	NA	NA	NA	NA
AGANGLLLVTPYYNK	Selenomonas	Genus	Bacteria		Firmicutes	Negativicutes	Selenomonadales	Selenomonadaceae	Selenomonas		13.2242	NA	NA	NA	12.2201	NA	12.7839	NA	NA	NA	11.2957	12.5212	NA	NA	NA	NA	NA	12.9741	11.6754	12.6681	14.1109	13.3991	NA	NA
AGAPVEITAVYASSK	Lachnospiraceae bacterium MD335	Species	Bacteria		Firmicutes	Clostridia	Clostridiales	Lachnospiraceae		Lachnospiraceae bacterium MD335	9.81552	NA	13.0251	NA	NA	NA	10.3498	NA	NA	NA	11.8399	NA	NA	NA	NA	NA	13.3769	NA	13.668	11.7402	NA	11.1446	NA	NA
AGAQNIVPNSTGAAK	Bacteria	Superkingdom	Bacteria								15.4511	16.3391	16.308	15.4628	17.9392	16.9408	17.1501	15.4171	16.1169	14.3505	16.1511	15.0358	19.0787	17.9356	18.1923	15.455	15.1161	15.0575	18.2267	16.2273	16.5525	14.0481	19.0573	17.031
AGATFVSPFLGR	Bacteria	Superkingdom	Bacteria								11.2942	11.6341	12.0436	12.3941	13.7611	13.7049	11.8114	13.5502	13.3504	12.6763	14.2128	13.0617	14.5148	13.3556	13.7334	12.2493	13.7337	12.9712	14.6781	13.2741	14.0336	13.1034	13.1723	11.2553
AGATLDILVENMGR	Muridae	Family	Eukaryota	Metazoa	Chordata	Mammalia	Rodentia	Muridae			NA	NA	NA	NA	NA	12.6837	NA	11.6623	NA	NA	NA	NA	11.9261	NA	NA	NA	NA	NA	NA	NA	NA	NA	NA	12.055
AGATYVSPFLGR	Bacteria	Superkingdom	Bacteria								15.3061	15.9703	16.3008	16.3048	17.7235	17.1712	17.4112	17.8138	16.5202	15.3617	15.979	15.8584	17.6659	17.4659	18.2498	17.2178	16.4881	16.5716	17.8311	16.1326	16.4113	15.7743	16.916	16.9703
AGAVAEEVLAAIR	Chordata	Phylum	Eukaryota	Metazoa	Chordata						15.9655	18.218	17.5937	18.4715	15.9143	15.4115	14.7277	NA	16.4002	15.7417	16.5722	15.0644	15.5732	15.6619	15.4583	16.105	15.3415	16.5893	15.942	15.582	15.4149	15.812	16.3719	16.2132
AGAVILEPIMK	Bacteria	Superkingdom	Bacteria								15.5491	15.4879	15.5986	NA	13.3805	12.4667	13.4487	15.4509	14.0621	14.1035	15.3727	15.4435	14.1562	12.9842	14.1409	14.2702	14.9238	13.1409	14.2703	14.8534	14.7154	14.6859	13.8751	12.7913
AGAVNIVPNSTGAAK	Firmicutes	Phylum	Bacteria		Firmicutes						NA	17.7784	18.1931	NA	20.1454	20.0708	20.6017	19.4387	19.774	NA	14.6452	19.1188	20.2925	20.0516	20.2657	18.9626	19.7202	19.2605	20.3434	NA	18.7531	NA	20.5197	19.3379
AGAVNPTVK	Mammalia	Class	Eukaryota	Metazoa	Chordata	Mammalia					NA	NA	NA	NA	NA	NA	NA	NA	15.5521	13.9144	NA	NA	11.5298	NA	NA	NA	NA	17.8676	NA	NA	15.0961	NA	NA	NA
AGAYAVGTGSSLTK	Clostridiales	Order	Bacteria		Firmicutes	Clostridia	Clostridiales				15.7538	15.5918	15.1284	14.925	16.5566	16.0793	16.6349	16.1975	16.7299	14.9142	16.7257	16.0238	16.4378	16.6403	16.6471	15.4907	16.6648	16.4469	17.4528	16.2352	17.1065	15.161	16.0035	15.5594
AGAYDFPSPEWDTVTPEAK	Chordata	Phylum	Eukaryota	Metazoa	Chordata						NA	9.73703	NA	9.5943	NA	10.026	NA	NA	NA	NA	NA	NA	NA	NA	NA	NA	NA	NA	9.11309	NA	NA	NA	NA	NA
AGCAVGSGIGSLQAMER	Lachnospiraceae bacterium A4	Species	Bacteria		Firmicutes	Clostridia	Clostridiales	Lachnospiraceae		Lachnospiraceae bacterium A4	NA	NA	NA	12.1916	13.8501	NA	13.4255	NA	NA	NA	11.9902	NA	13.0219	14.0555	12.3425	13.4388	NA	NA	NA	NA	NA	12.6502	12.2306	NA
AGCDNQAHTLLCGTK	Hungateiclostridiaceae bacterium KB18	Species	Bacteria		Firmicutes	Clostridia	Clostridiales	Hungateiclostridiaceae		Hungateiclostridiaceae bacterium KB18	NA	NA	NA	NA	NA	NA	NA	14.6736	NA	NA	NA	12.1613	13.6348	NA	NA	NA	NA	NA	NA	NA	NA	NA	NA	NA
AGCQVVAPSDMMDGR	Mammalia	Class	Eukaryota	Metazoa	Chordata	Mammalia					10.968	12.0844	10.3794	11.9964	NA	NA	NA	NA	11.0962	NA	NA	10.4783	10.0354	9.91859	NA	NA	NA	NA	NA	10.7639	NA	NA	11.2456	NA
AGDDAAGLAISEK	Bacteria	Superkingdom	Bacteria								20.0879	20.6386	20.5461	20.7886	21.0232	20.7873	20.8951	21.0185	20.8071	20.0426	20.8377	20.228	21.0153	20.9633	21.3915	20.5395	20.6378	20.7987	21.0023	20.5713	20.2773	20.2675	21.047	21.0036
AGDDAAGLAISEKMR	Bacteria	Superkingdom	Bacteria								NA	NA	NA	NA	NA	NA	NA	13.8709	NA	NA	NA	12.7774	12.824	NA	NA	NA	NA	NA	NA	NA	NA	NA	13.4885	NA
AGDDAAGLAISENMR	Geobacter	Genus	Bacteria		Proteobacteria	Deltaproteobacteria	Desulfuromonadales	Geobacteraceae	Geobacter		14.9262	14.4272	17.2755	15.7405	16.4256	16.2581	14.8454	14.6743	14.8775	13.3813	16.8694	15.0039	17.0287	16.5731	16.5973	13.9287	13.6099	14.3741	16.4648	15.5291	13.246	13.6087	15.6717	14.6791
AGDDAAGLAISEQMR	Clostridiales	Order	Bacteria		Firmicutes	Clostridia	Clostridiales				11.004	15.3948	15.147	15.9872	14.7407	14.2604	12.134	14.5524	15.2831	12.9648	16.0186	11.5119	16.0858	14.8112	15.6406	14.016	14.1915	13.8191	16.0911	15.0244	13.8547	14.0684	14.1026	15.2457
AGDDAAGLAISESMR	Lachnospiraceae bacterium JC7	Species	Bacteria		Firmicutes	Clostridia	Clostridiales	Lachnospiraceae		Lachnospiraceae bacterium JC7	16.554	18.0268	17.7491	19.1724	18.9264	19.0754	18.2564	18.8334	17.2221	17.115	18.783	17.6593	19.4892	18.8693	18.8777	17.2649	17.8231	19.6222	19.5886	17.7997	17.0576	17.5015	18.2681	18.4458
AGDDAAGLAVSEK	Bacteria	Superkingdom	Bacteria								14.9772	18.255	15.4883	17.3769	17.0402	20.9503	19.5536	17.008	15.9968	19.3078	16.4237	11.4634	15.86	17.2933	16.723	18.1132	13.7358	NA	14.2984	17.5086	16.8955	16.9373	16.2576	19.2707
AGDDAAGLK	Roseburia	Genus	Bacteria		Firmicutes	Clostridia	Clostridiales	Lachnospiraceae	Roseburia		NA	20.675	NA	21.4088	18.1485	NA	NA	NA	NA	NA	NA	NA	NA	18.2938	NA	21.4835	16.5308	17.1881	18.8202	NA	NA	NA	NA	19.4603
AGDDAAGLKISEK	Roseburia	Genus	Bacteria		Firmicutes	Clostridia	Clostridiales	Lachnospiraceae	Roseburia		NA	NA	NA	NA	NA	NA	NA	14.0729	11.0731	NA	NA	10.7356	13.6821	NA	NA	NA	NA	NA	NA	NA	11.0968	NA	14.6	12.6109
AGDDAAGLSISEK	Bacteria	Superkingdom	Bacteria								18.3656	18.109	18.5766	18.6387	20.4881	19.9216	18.9962	20.3758	19.1038	18.0775	19.5356	16.0108	19.5174	NA	18.5906	19.0953	19.2354	19.7617	20.3335	16.4148	17.6463	19.3795	19.7724	19.1451
AGDDAAGLSISEKMR	Bacteria	Superkingdom	Bacteria								NA	NA	NA	NA	NA	NA	NA	12.9619	NA	NA	NA	NA	NA	NA	NA	NA	NA	NA	NA	NA	NA	NA	NA	NA
AGDDAAGLTISEK	Clostridiales	Order	Bacteria		Firmicutes	Clostridia	Clostridiales				NA	NA	NA	NA	NA	NA	NA	NA	18.0784	16.6796	NA	NA	21.054	NA	NA	NA	17.8696	18.1481	NA	NA	NA	NA	19.7715	NA
AGDDANTAFEK	Clostridiales	Order	Bacteria		Firmicutes	Clostridia	Clostridiales				NA	NA	12.7504	NA	14.0415	13.3883	12.9044	NA	NA	NA	NA	NA	13.3045	14.3247	NA	13.3118	NA	NA	NA	NA	12.361	NA	10.3281	13.4675
AGDDASGLAISEK	Anaerotruncus	Genus	Bacteria		Firmicutes	Clostridia	Clostridiales	Ruminococcaceae	Anaerotruncus		15.0193	16.9242	16.2627	17.9297	16.7788	15.5893	14.8884	16.9552	16.0649	15.5055	15.2614	13.818	16.0796	16.6782	16.1002	16.2051	15.4073	15.6407	17.7705	15.8418	15.5022	15.8763	17.4466	18.4146
AGDDVDVVVTFPEDYGAK	Lactobacillus	Genus	Bacteria		Firmicutes	Bacilli	Lactobacillales	Lactobacillaceae	Lactobacillus		NA	11.7674	NA	NA	NA	NA	NA	12.0481	NA	NA	11.8689	12.0707	NA	NA	11.3556	NA	11.4971	10.2188	11.7515	11.1705	12.3932	NA	11.3707	10.9423
AGDEFVEK	Mammalia	Class	Eukaryota	Metazoa	Chordata	Mammalia					15.0238	16.9934	16.506	16.6812	14.4788	15.9657	13.0969	14.2331	14.7349	14.9503	14.5941	15.2828	14.9454	14.4849	15.1528	14.8277	14.8493	15.5378	15.0985	14.6607	14.9931	14.2681	14.1971	15.4377
AGDEIICMDEVYGGTNR	Mus musculus	Species	Eukaryota	Metazoa	Chordata	Mammalia	Rodentia	Muridae	Mus	Mus musculus	12.28	12.8783	12.9711	12.9608	11.6235	12.2934	11.04	12.0476	11.5488	12.1131	12.3552	12.0493	12.2908	11.9038	NA	12.1487	11.9779	11.9175	11.7155	11.8675	12.4152	12.136	12.7059	11.9303
AGDIATCYADASK	Bacteria	Superkingdom	Bacteria								13.1777	NA	11.0442	NA	13.131	11.1751	13.2888	12.4416	NA	NA	12.8068	13.8113	12.6611	13.1263	11.829	12.349	NA	NA	13.0061	13.6438	NA	NA	13.2038	NA
AGDISYGEMVNGQWVEHTLPAGGVDIK	Dorea sp. 5-2	Species	Bacteria		Firmicutes	Clostridia	Clostridiales	Lachnospiraceae	Dorea	Dorea sp. 5-2	NA	9.82803	NA	NA	9.8129	NA	NA	NA	NA	NA	10.9607	NA	NA	9.68016	9.86755	NA	12.6718	NA	11.8609	NA	10.2079	11.516	NA	10.761
AGDKDDITEPAVCALR	Mammalia	Class	Eukaryota	Metazoa	Chordata	Mammalia					NA	11.2777	NA	10.7843	NA	11.6885	NA	NA	NA	10.1683	11.8077	NA	NA	NA	NA	NA	NA	NA	11.0612	10.7809	NA	NA	NA	11.1294
AGDLGVDLTSK	Mammalia	Class	Eukaryota	Metazoa	Chordata	Mammalia					12.9429	15.12	14.8604	15.2962	11.8763	15.3325	NA	NA	NA	NA	12.1955	NA	NA	11.9549	13.2773	11.6313	NA	12.194	14.3101	12.3342	NA	NA	NA	15.4084
AGDNAAGLAISEK	Firmicutes	Phylum	Bacteria		Firmicutes						NA	18.7183	15.6918	20.3072	NA	18.6864	NA	19.3338	17.7425	17.1591	18.8063	17.3667	NA	NA	NA	NA	17.4741	18.5588	19.6855	16.9931	NA	NA	17.0189	NA
AGDNIFICK	Clostridiales	Order	Bacteria		Firmicutes	Clostridia	Clostridiales				NA	NA	NA	NA	12.3034	11.9077	12.6746	13.3396	12.0862	NA	12.7266	12.4829	NA	12.7513	11.0532	11.8946	13.2067	NA	12.8591	11.7104	12.5096	11.4306	12.2599	NA
AGDNILAVLK	Chordata	Phylum	Eukaryota	Metazoa	Chordata						NA	NA	NA	NA	12.4614	13.6821	11.3481	12.624	12.505	13.7294	NA	12.8884	11.4098	12.8571	12.3965	13.6791	NA	14.184	11.6621	12.6943	12.3724	14.3803	13.0791	11.9272
AGDNVIYSK	Lachnospiraceae	Family	Bacteria		Firmicutes	Clostridia	Clostridiales	Lachnospiraceae			15.7578	11.7782	15.922	14.077	17.6858	16.9231	18.241	14.9589	16.5568	16.02	14.7083	14.9095	16.673	17.7366	16.5925	15.9695	16.8505	17.1663	16.5482	16.2122	15.249	16.5915	17.3367	15.6888
AGDQVIYSK	Clostridiales	Order	Bacteria		Firmicutes	Clostridia	Clostridiales				10.9063	NA	NA	NA	13.015	NA	NA	NA	NA	NA	10.5811	NA	15.8809	13.0728	16.2712	11.9077	13.7327	13.1405	11.3741	NA	10.8819	NA	13.3437	NA
AGDREDITEPAICALR	Chordata	Phylum	Eukaryota	Metazoa	Chordata						NA	12.6632	12.3931	NA	11.0051	12.3913	NA	NA	10.6033	NA	10.1847	11.3541	11.6079	11.4728	NA	11.2027	11.2694	NA	11.7875	10.9812	11.5169	NA	12.0587	11.8124
AGDTPNDAWEK	Clostridiales	Order	Bacteria		Firmicutes	Clostridia	Clostridiales				14.1438	14.3122	14.1982	14.4564	15.1194	16.0273	15.9404	16.0674	15.2001	14.7414	15.4076	14.4341	14.4264	15.0965	15.8472	14.4092	16.2117	15.772	15.1951	14.2777	14.4292	14.4267	13.5373	14.4293
AGDTVIPLYIPQCGECK	Chordata	Phylum	Eukaryota	Metazoa	Chordata						13.2709	14.9347	13.3677	14.8407	13.9192	14.5638	12.1679	13.8254	13.9639	14.3186	13.1022	14.1123	14.8409	13.7932	NA	14.1825	13.6903	14.0412	13.5373	14.5277	14.1114	13.7069	15.2727	14.3056
AGDTVLLK	Bacteria	Superkingdom	Bacteria								13.8122	NA	14.8892	NA	14.8018	NA	13.5399	15.9543	13.7175	NA	14.7102	NA	11.6764	14.4235	NA	NA	13.3362	NA	14.3057	13.222	14.4151	14.7812	NA	NA
AGDTVTVAYR	Bacteria	Superkingdom	Bacteria								14.7521	16.6468	15.7995	16.3872	13.6131	16.2313	12.858	14.9719	14.3719	13.8036	14.753	14.6195	14.1862	13.6956	15.5038	15.0118	13.9388	14.2681	13.896	16.092	14.0383	12.5978	14.9129	16.7882
AGDVFFIK	Dorea sp. 5-2	Species	Bacteria		Firmicutes	Clostridia	Clostridiales	Lachnospiraceae	Dorea	Dorea sp. 5-2	11.0139	12.2255	10.6567	11.9023	12.9871	12.7702	13.2477	13.6778	13.0188	NA	12.512	NA	12.0672	12.6046	12.1858	11.167	13.9958	12.7649	12.8828	NA	12.6914	11.7189	11.2373	NA
AGDVFFIKK	Dorea sp. 5-2	Species	Bacteria		Firmicutes	Clostridia	Clostridiales	Lachnospiraceae	Dorea	Dorea sp. 5-2	NA	NA	NA	NA	NA	11.2396	11.0577	NA	NA	NA	10.0948	NA	NA	NA	NA	NA	NA	NA	10.6791	NA	10.6791	NA	NA	NA
AGDVIEIKEK	Clostridiales	Order	Bacteria		Firmicutes	Clostridia	Clostridiales				12.2445	NA	NA	NA	NA	12.6701	13.8983	NA	NA	NA	12.9039	NA	NA	NA	NA	NA	NA	NA	12.3113	11.3968	NA	NA	NA	12.5527
AGDVIELR	Bacteria	Superkingdom	Bacteria								12.0656	13.3179	13.8682	NA	15.5511	14.1553	13.8617	NA	14.0832	NA	13.6314	14.4939	15.8918	15.5357	12.8391	14.4939	13.6649	13.8779	15.356	14.8903	NA	14.2459	15.102	14.5487
AGDVIEVR	Bacteria	Superkingdom	Bacteria								15.3413	14.8432	14.4542	15.3742	16.4656	16.2646	15.2904	15.6217	16.1203	14.7939	15.3312	15.8596	16.0975	16.4905	16.5957	16.2468	15.9633	15.5814	15.8841	15.9163	14.4837	14.5679	16.4177	NA
AGDVKDASLK	Bacteria	Superkingdom	Bacteria								NA	NA	NA	NA	NA	NA	NA	NA	NA	NA	NA	NA	NA	NA	NA	NA	NA	NA	NA	NA	NA	NA	NA	11.0943
AGDVVEIK	Bacteria	Superkingdom	Bacteria								13.3848	NA	13.7893	NA	13.9045	15.4287	NA	14.2516	14.7494	12.8736	13.4495	14.7221	14.5262	NA	14.518	NA	14.7357	13.9787	14.9737	13.6473	13.6966	15.3201	14.7936	15.8374
AGDVVEVK	Proteobacteria	Phylum	Bacteria		Proteobacteria						11.7904	NA	NA	NA	NA	NA	NA	NA	NA	NA	NA	NA	NA	NA	13.5927	NA	NA	NA	NA	NA	NA	NA	NA	NA
AGDYPDVVHCATGR	Clostridiales	Order	Bacteria		Firmicutes	Clostridia	Clostridiales				NA	NA	NA	NA	13.7882	14.0434	NA	13.6473	14.2783	11.8547	NA	NA	13.1425	13.5694	10.2957	NA	14.2704	13.8699	14.3244	NA	NA	12.7403	13.4747	NA
AGDYPDVVHLATGR	Lachnospiraceae	Family	Bacteria		Firmicutes	Clostridia	Clostridiales	Lachnospiraceae			NA	NA	NA	NA	NA	NA	NA	13.431	NA	NA	NA	NA	14.4912	NA	NA	NA	NA	NA	NA	NA	NA	NA	NA	NA
AGEAVTGQVIGVK	Clostridiales	Order	Bacteria		Firmicutes	Clostridia	Clostridiales				NA	NA	12.7154	NA	11.7231	NA	NA	10.9912	NA	NA	11.1348	12.2955	NA	12.2525	12.7523	NA	11.5506	NA	NA	NA	NA	12.0687	NA	NA
AGEAVVLFQMPVSELLK	Mus musculus	Species	Eukaryota	Metazoa	Chordata	Mammalia	Rodentia	Muridae	Mus	Mus musculus	NA	NA	NA	NA	NA	10.0316	NA	9.64992	9.85649	NA	NA	NA	9.1905	NA	NA	NA	8.32887	8.87984	NA	NA	9.53606	NA	10.5095	9.49789
AGEEITEAIAEAIEK	Alistipes finegoldii	Species	Bacteria		Bacteroidetes	Bacteroidia	Bacteroidales	Rikenellaceae	Alistipes	Alistipes finegoldii	11.097	12.1704	12.2456	NA	13.0031	12.6559	10.9243	12.3487	11.5551	NA	12.1964	NA	13.1899	12.7963	12.5243	11.605	11.7961	NA	12.4189	NA	11.8247	NA	12.62	12.9768
AGEILTKR	Chordata	Phylum	Eukaryota	Metazoa	Chordata						NA	NA	NA	NA	NA	13.3894	NA	NA	NA	NA	11.7976	NA	NA	NA	NA	NA	NA	12.5602	12.871	NA	NA	NA	NA	13.7479
AGEIPDGWQGLDIGPETVK	Oscillibacter sp. KLE 1745	Species	Bacteria		Firmicutes	Clostridia	Clostridiales	Oscillospiraceae	Oscillibacter	Oscillibacter sp. KLE 1745	NA	NA	NA	NA	NA	NA	NA	NA	NA	NA	NA	NA	11.866	11.024	12.4333	NA	10.605	NA	NA	NA	NA	NA	11.4904	12.4806
AGELLVPFR	Bacteria	Superkingdom	Bacteria								NA	NA	NA	NA	NA	NA	NA	13.0131	12.151	NA	NA	NA	12.6134	12.8437	12.633	12.4299	NA	13.7521	13.1452	NA	13.564	13.2917	14.2175	NA
AGELVLTSESSR	Rodentia	Order	Eukaryota	Metazoa	Chordata	Mammalia	Rodentia				NA	NA	NA	NA	NA	12.5685	NA	NA	NA	NA	NA	NA	NA	NA	NA	NA	NA	NA	NA	NA	NA	NA	NA	11.9458
AGEMSAITETIDAK	Lachnospiraceae bacterium MD335	Species	Bacteria		Firmicutes	Clostridia	Clostridiales	Lachnospiraceae		Lachnospiraceae bacterium MD335	12.742	NA	13.3155	NA	14.855	13.3742	13.7539	12.6164	14.058	13.7509	13.8469	14.3953	15.0825	15.0111	14.1638	15.1954	15.1095	13.5129	14.7772	14.2826	14.6994	14.067	14.6051	13.9296
AGENAVMTAK	Lachnospiraceae bacterium MD335	Species	Bacteria		Firmicutes	Clostridia	Clostridiales	Lachnospiraceae		Lachnospiraceae bacterium MD335	NA	NA	15.5403	NA	15.7883	NA	13.7924	NA	NA	15.7828	NA	NA	NA	15.8404	15.0439	16.3705	16.0671	NA	15.922	NA	NA	NA	NA	NA
AGEQLAPFLPQLVPR	Chordata	Phylum	Eukaryota	Metazoa	Chordata						NA	10.4544	NA	NA	NA	NA	NA	NA	NA	NA	NA	NA	NA	NA	NA	NA	NA	NA	NA	NA	NA	NA	NA	NA
AGEQVAQYTLNIIDTAK	Lachnospiraceae bacterium A4	Species	Bacteria		Firmicutes	Clostridia	Clostridiales	Lachnospiraceae		Lachnospiraceae bacterium A4	NA	NA	NA	NA	12.9217	13.5776	13.469	NA	12.1681	13.1489	NA	NA	NA	12.8753	NA	11.1353	12.575	11.3046	NA	NA	NA	13.1873	12.0882	NA
AGESAVMTAK	Lachnospiraceae bacterium MD335	Species	Bacteria		Firmicutes	Clostridia	Clostridiales	Lachnospiraceae		Lachnospiraceae bacterium MD335	14.9727	NA	15.2332	NA	15.7575	13.7956	14.0837	NA	NA	15.7218	15.2596	NA	NA	15.9001	15.2109	16.2628	16.3753	15.3473	16.2833	15.8082	NA	14.9416	NA	NA
AGETEMQQVADLLGGK	Oscillibacter sp. 1-3	Species	Bacteria		Firmicutes	Clostridia	Clostridiales	Oscillospiraceae	Oscillibacter	Oscillibacter sp. 1-3	NA	9.92313	NA	NA	11.7794	10.9664	12.059	9.78802	11.0587	NA	NA	NA	11.6202	11.7282	11.7572	NA	10.3618	NA	11.0255	11.0257	10.4717	10.1901	12.6431	10.5397
AGETGYLEVPYTGYTINPDFR	Lachnospiraceae bacterium A4	Species	Bacteria		Firmicutes	Clostridia	Clostridiales	Lachnospiraceae		Lachnospiraceae bacterium A4	NA	NA	NA	NA	9.62837	10.0786	NA	9.7469	NA	NA	NA	NA	NA	10.8308	NA	NA	NA	NA	NA	NA	NA	9.67709	NA	NA
AGETVDIVGLQEEK	Firmicutes bacterium ASF500	Species	Bacteria		Firmicutes					Firmicutes bacterium ASF500	14.1066	13.7252	13.4577	13.9209	15.1989	15.2848	13.7525	13.2387	14.1541	11.6768	14.4985	13.0419	15.7792	15.2936	15.7807	14.1711	12.9928	12.6107	15.1306	13.6227	12.2677	12.8196	14.6942	14.3368
AGETVDIVGLQEEKK	Firmicutes bacterium ASF500	Species	Bacteria		Firmicutes					Firmicutes bacterium ASF500	10.9166	10.8829	NA	11.7644	12.0057	11.7943	11.7963	9.53311	NA	NA	11.3522	NA	12.4134	12.0413	12.7664	11.3126	10.2022	9.61911	12.6897	10.0595	NA	10.2229	11.5243	11.3792
AGETVEIVGLSEEK	Clostridiales	Order	Bacteria		Firmicutes	Clostridia	Clostridiales				NA	13.0373	12.1805	12.6426	NA	14.4545	13.0602	13.9671	13.093	11.0077	13.0144	NA	NA	NA	NA	NA	NA	NA	12.7579	12.7405	11.7789	NA	NA	14.9737
AGETVEIVGLSEEKK	Clostridiales	Order	Bacteria		Firmicutes	Clostridia	Clostridiales				NA	12.3537	11.7076	12.5702	13.0193	14.9076	12.9389	12.9087	11.574	NA	11.9988	NA	12.906	12.9257	13.5223	NA	NA	NA	13.4145	12.0399	NA	NA	12.4888	15.2414
AGETVEIVGLTDEK	Flavonifractor	Genus	Bacteria		Firmicutes	Clostridia	Clostridiales	Ruminococcaceae	Flavonifractor		13.0447	NA	12.5038	NA	14.4175	NA	13.7359	12.2923	13.2293	14.2231	13.5047	12.7111	15.1805	14.4052	14.0483	13.5524	14.0366	13.2112	13.5046	13.0053	12.2309	12.7999	14.3072	NA
AGETVTISAFAPDSSSK	Lachnospiraceae bacterium MD335	Species	Bacteria		Firmicutes	Clostridia	Clostridiales	Lachnospiraceae		Lachnospiraceae bacterium MD335	NA	NA	NA	NA	NA	NA	NA	NA	NA	NA	11.1016	11.0956	NA	NA	NA	11.3832	12.2683	NA	NA	11.1768	12.5084	10.9109	10.8528	11.1329
AGEVIGEALPASPGAAAGK	Clostridiales	Order	Bacteria		Firmicutes	Clostridia	Clostridiales				14.6721	12.4975	12.2219	12.6807	15.5191	14.4676	16.1633	15.4692	13.9606	13.26	14.7885	14.8826	15.1302	15.4281	15.8697	14.9019	14.3631	14.8012	15.4937	15.2838	13.8626	14.5386	14.111	14.8458
AGEVIGQALPASPGAAAGK	Clostridiales	Order	Bacteria		Firmicutes	Clostridia	Clostridiales				14.8171	11.9421	14.2096	13.262	15.6629	14.6442	16.0686	15.2563	14.8506	13.7585	15.4022	14.9435	15.4111	15.9692	15.8517	14.589	15.2242	15.0765	14.1878	15.0018	14.5695	14.6983	15.3325	13.6124
AGEVIGSALPASPGAAAGK	Clostridiales	Order	Bacteria		Firmicutes	Clostridia	Clostridiales				10.4446	12.4799	11.2521	13.2152	14.4688	13.0771	13.6399	12.7694	14.0872	11.5802	11.7437	13.8051	19.122	14.9273	16.5212	15.3125	14.0991	11.9409	16.8873	14.2711	12.5787	13.654	15.8054	13.5821
AGEVINQPMMMAAR	Mammalia	Class	Eukaryota	Metazoa	Chordata	Mammalia					NA	11.3582	NA	9.45172	NA	11.519	NA	NA	NA	NA	NA	NA	NA	NA	NA	NA	NA	NA	NA	NA	NA	NA	NA	10.9035
AGEVPEAIR	Bacteria	Superkingdom	Bacteria								16.0094	15.4176	15.5695	15.5454	16.8055	16.5978	17.366	16.7118	16.7467	15.4721	16.4237	16.5324	16.8709	16.9947	17.3147	15.9952	17.0662	17.2034	16.7732	16.7769	16.2513	16.0914	16.7486	16.4327
AGEVPEAIRK	Bacteria	Superkingdom	Bacteria								NA	NA	NA	NA	NA	NA	NA	15.0882	NA	NA	NA	15.4775	NA	NA	NA	NA	NA	NA	NA	NA	15.5615	NA	14.8952	NA
AGEVTAAIAK	Bacteria	Superkingdom	Bacteria								NA	NA	NA	NA	NA	NA	NA	13.8422	NA	NA	NA	14.1125	14.9661	13.8103	NA	NA	NA	NA	NA	NA	15.1655	NA	14.3295	15.6513
AGEVVGLAGLMGAGR	Bacteria	Superkingdom	Bacteria								12.3193	12.0242	12.5459	11.9549	14.4049	12.6749	14.3446	NA	12.7727	NA	13.2679	13.2751	NA	14.0952	14.8771	13.6681	13.2309	13.5859	13.844	12.9557	12.7953	11.5597	12.8299	13.142
AGEVVYIK	Lachnospiraceae bacterium A4	Species	Bacteria		Firmicutes	Clostridia	Clostridiales	Lachnospiraceae		Lachnospiraceae bacterium A4	12.1849	11.5764	14.4617	13.8735	14.0745	14.6427	12.9375	NA	NA	NA	11.5192	11.1285	NA	14.0452	NA	NA	NA	NA	NA	13.2556	NA	NA	NA	NA
AGEYSVMYDGFNTFTILK	Mus musculus	Species	Eukaryota	Metazoa	Chordata	Mammalia	Rodentia	Muridae	Mus	Mus musculus	NA	NA	NA	NA	10.5625	10.6426	NA	10.4425	9.2376	NA	NA	NA	11.3555	10.8276	11.1107	NA	9.80625	NA	NA	NA	NA	NA	NA	11.5264
AGEYSVTYDGFNTFTIPK	Mus	Genus	Eukaryota	Metazoa	Chordata	Mammalia	Rodentia	Muridae	Mus		16.3948	14.1417	14.5157	13.3371	17.0128	14.1326	10.2592	12.5038	15.6078	12.5442	13.4317	10.3331	17.2962	17.499	14.5283	NA	15.1634	13.7186	10.7194	14.6498	12.1839	14.3234	16.1977	10.6996
AGEYSVTYDGSNTFTILK	Mus musculus	Species	Eukaryota	Metazoa	Chordata	Mammalia	Rodentia	Muridae	Mus	Mus musculus	NA	NA	NA	NA	NA	NA	NA	NA	NA	NA	NA	NA	10.3199	10.064	NA	NA	NA	NA	NA	NA	NA	NA	9.39414	NA
AGEYTMTFYAK	Prevotella	Genus	Bacteria		Bacteroidetes	Bacteroidia	Bacteroidales	Prevotellaceae	Prevotella		NA	NA	NA	11.4716	NA	NA	NA	NA	NA	NA	NA	NA	NA	NA	NA	NA	NA	NA	NA	NA	11.4237	NA	NA	NA
AGFAGDQIPK	Metazoa	Kingdom	Eukaryota	Metazoa							NA	12.3882	NA	12.1679	NA	NA	NA	NA	NA	NA	NA	NA	NA	NA	NA	NA	NA	NA	NA	NA	NA	NA	NA	NA
AGFCTFYEECGK	Rodentia	Order	Eukaryota	Metazoa	Chordata	Mammalia	Rodentia				NA	10.3945	NA	10.7297	9.5504	10.4716	NA	10.4716	NA	NA	NA	9.6116	11.3807	10.2181	NA	NA	NA	NA	NA	10.2327	10.2922	NA	11.3255	NA
AGFFSSDR	Bacteria	Superkingdom	Bacteria								NA	NA	NA	NA	NA	15.8295	17.0915	16.5034	16.1806	NA	NA	17.0597	16.9643	17.4307	NA	16.4309	NA	NA	16.5941	NA	12.4365	NA	16.7283	15.6304
AGFLGIPIPK	Roseburia	Genus	Bacteria		Firmicutes	Clostridia	Clostridiales	Lachnospiraceae	Roseburia		NA	12.2036	12.0571	13.5124	12.7498	12.6625	NA	NA	NA	NA	NA	NA	NA	12.3099	NA	13.4908	NA	NA	12.3561	NA	NA	11.5388	NA	NA
AGFLGIPVPK	Clostridiales	Order	Bacteria		Firmicutes	Clostridia	Clostridiales				NA	NA	NA	NA	13.172	15.6706	12.5303	13.5844	13.9753	NA	NA	NA	14.8921	NA	13.6876	12.702	NA	14.0711	15.8939	13.1184	13.1252	11.9194	14.7364	16.4733
AGFMGIPIPK	Lachnospiraceae	Family	Bacteria		Firmicutes	Clostridia	Clostridiales	Lachnospiraceae			15.7353	11.7296	13.7775	13.559	16.2711	14.563	16.5992	13.2652	13.8328	12.6522	15.4971	15.2088	15.4347	16.0018	16.265	14.3999	13.5515	14.191	15.9091	16.3623	13.3861	14.1583	15.2826	14.0003
AGFMGIPVPK	Clostridium	Genus	Bacteria		Firmicutes	Clostridia	Clostridiales	Clostridiaceae	Clostridium		11.1092	NA	NA	NA	14.0501	12.5122	13.8284	NA	12.3942	13.171	12.7811	NA	14.355	14.2061	14.312	11.4092	13.1456	12.5442	14.2407	NA	NA	NA	15.0126	NA
AGFMLQEADK	Mammalia	Class	Eukaryota	Metazoa	Chordata	Mammalia					13.7367	15.3603	14.5588	15.696	13.816	14.5047	10.998	NA	12.1187	12.75	13.3374	NA	14.3639	13.3036	14.3649	13.5198	12.7441	13.3557	13.7831	13.8456	NA	NA	13.7902	14.737
AGFPDVAQNIYNMLR	Lachnospiraceae	Family	Bacteria		Firmicutes	Clostridia	Clostridiales	Lachnospiraceae			NA	11.1641	NA	NA	11.7054	12.6234	11.6146	11.98	10.7828	NA	11.7501	NA	12.4641	11.2508	11.7653	10.0205	NA	11.3759	12.1015	NA	11.4516	11.1048	12.2969	11.5452
AGFQLANEEK	Lachnospiraceae bacterium A4	Species	Bacteria		Firmicutes	Clostridia	Clostridiales	Lachnospiraceae		Lachnospiraceae bacterium A4	NA	NA	NA	NA	NA	NA	NA	NA	NA	NA	NA	NA	NA	NA	NA	NA	NA	13.9382	NA	NA	NA	12.8266	NA	NA
AGFSETFLNEMIAPVMK	Muridae	Family	Eukaryota	Metazoa	Chordata	Mammalia	Rodentia	Muridae			NA	NA	NA	NA	NA	NA	NA	10.0554	NA	NA	NA	NA	NA	NA	NA	NA	NA	NA	NA	NA	NA	NA	NA	NA
AGFTNYGNK	Lachnospiraceae bacterium A4	Species	Bacteria		Firmicutes	Clostridia	Clostridiales	Lachnospiraceae		Lachnospiraceae bacterium A4	14.2101	14.5496	15.7935	14.9949	14.8992	14.4788	15.2623	NA	15.1564	13.5223	14.9317	12.734	15.9153	14.8564	15.4536	14.4738	12.0923	NA	NA	NA	NA	12.7937	14.8923	12.9262
AGFTSIMFDGSHYPIEENVAK	Clostridiales	Order	Bacteria		Firmicutes	Clostridia	Clostridiales				12.5676	11.8865	12.4331	12.6059	13.7826	15.764	NA	13.788	12.7676	NA	13.207	10.5561	14.5779	13.6718	14.0358	13.2322	13.1759	14.1419	15.0742	12.4159	13.5251	14.9714	14.1418	15.9182
AGFVDGGVIDAAK	Anaerotruncus	Genus	Bacteria		Firmicutes	Clostridia	Clostridiales	Ruminococcaceae	Anaerotruncus		13.69	13.0848	12.8872	13.5601	13.4708	NA	13.0922	14.1984	12.8412	12.4022	12.5702	14.0379	NA	13.729	13.4793	13.4531	12.8567	13.4433	14.2038	13.3876	12.758	13.6336	13.6823	15.2088
AGFVGGQFWSAYMPCDTQNK	Muridae	Family	Eukaryota	Metazoa	Chordata	Mammalia	Rodentia	Muridae			11.4995	12.6325	12.7149	13.0919	13.3905	13.3826	11.6407	13.1338	12.1519	12.1805	10.7487	11.7672	13.0832	13.183	11.5258	10.6171	14.3982	11.761	12.3022	11.8678	13.6622	12.1472	13.2828	12.6396
AGFVNIVGNPNVGK	Bacteria	Superkingdom	Bacteria								NA	NA	NA	9.55295	12.5522	11.3319	10.5066	NA	NA	NA	NA	NA	NA	12.6736	13.5208	NA	NA	NA	13.6026	NA	NA	NA	NA	12.6147
AGFYFDGISR	Mammalia	Class	Eukaryota	Metazoa	Chordata	Mammalia					NA	NA	NA	NA	NA	NA	NA	NA	NA	NA	NA	NA	NA	NA	NA	NA	NA	NA	NA	NA	NA	NA	12.3107	NA
AGGAGVPAFYTSTGYGTLVQEGGSPIK	Mammalia	Class	Eukaryota	Metazoa	Chordata	Mammalia					NA	NA	NA	NA	NA	10.6588	NA	NA	NA	NA	NA	NA	NA	NA	NA	NA	NA	NA	NA	NA	NA	NA	NA	NA
AGGEVVALLK	Bacteria	Superkingdom	Bacteria								NA	NA	NA	NA	NA	NA	NA	NA	NA	NA	NA	NA	10.6011	NA	10.8369	NA	NA	NA	NA	NA	NA	NA	NA	NA
AGGIETIANEYSDR	Metazoa	Kingdom	Eukaryota	Metazoa							NA	11.9165	10.4886	11.9341	NA	11.6162	NA	NA	NA	NA	NA	NA	NA	NA	10.3803	NA	NA	NA	NA	NA	NA	NA	NA	11.2962
AGGILDQIK	Clostridiales	Order	Bacteria		Firmicutes	Clostridia	Clostridiales				NA	NA	NA	NA	NA	NA	NA	14.5979	NA	NA	NA	NA	11.6714	NA	NA	NA	NA	NA	NA	NA	NA	NA	NA	NA
AGGLYYNR	Anaerotruncus sp. G3(2012)	Species	Bacteria		Firmicutes	Clostridia	Clostridiales	Ruminococcaceae	Anaerotruncus	Anaerotruncus sp. G3(2012)	NA	NA	NA	NA	NA	NA	NA	12.2392	11.8941	NA	NA	NA	NA	NA	NA	10.9709	11.6073	NA	NA	NA	NA	NA	NA	NA
AGGNFTQVK	Mycena chlorophos	Species	Eukaryota	Fungi	Basidiomycota	Agaricomycetes	Agaricales	Mycenaceae	Mycena	Mycena chlorophos	14.6629	14.2652	15.088	12.3589	12.7361	NA	NA	NA	13.4674	10.7067	13.529	11.9123	12.6475	12.5997	12.5798	11.2841	10.734	10.9013	12.7702	12.3052	12.8518	NA	11.8531	13.8085
AGGQGTGEFAAPAWK	Lachnospiraceae bacterium A4	Species	Bacteria		Firmicutes	Clostridia	Clostridiales	Lachnospiraceae		Lachnospiraceae bacterium A4	NA	NA	NA	NA	NA	NA	NA	12.8155	NA	NA	NA	NA	NA	NA	NA	NA	NA	NA	NA	NA	NA	NA	NA	NA
AGGSAPAASAAGTALCCK	Lachnospiraceae bacterium A2	Species	Bacteria		Firmicutes	Clostridia	Clostridiales	Lachnospiraceae		Lachnospiraceae bacterium A2	NA	NA	10.6134	NA	10.2349	10.7346	11.7683	10.8347	NA	NA	NA	NA	NA	11.0561	NA	12.2047	NA	8.96749	NA	9.9606	12.918	NA	NA	NA
AGGSASAMLQPLLDNQVGFK	Metazoa	Kingdom	Eukaryota	Metazoa							11.07	12.2202	11.0408	12.3027	11.7047	12.2749	9.86382	10.7302	10.7759	8.76262	NA	NA	13.0828	11.292	12.02	10.9346	10.7991	10.4028	11.6401	NA	10.9489	8.919	12.3967	11.6406
AGGYADATNVDAVR	Oscillibacter sp. 1-3	Species	Bacteria		Firmicutes	Clostridia	Clostridiales	Oscillospiraceae	Oscillibacter	Oscillibacter sp. 1-3	NA	NA	10.4273	NA	NA	NA	NA	NA	NA	NA	NA	NA	13.3093	NA	12.4788	10.3705	NA	NA	12.8193	NA	NA	NA	12.2753	11.9599
AGGYADATNVDAVRK	Oscillibacter sp. 1-3	Species	Bacteria		Firmicutes	Clostridia	Clostridiales	Oscillospiraceae	Oscillibacter	Oscillibacter sp. 1-3	NA	NA	NA	NA	NA	NA	NA	NA	NA	NA	NA	NA	11.7078	NA	11.0112	NA	NA	NA	10.5797	NA	NA	NA	10.8294	10.168
AGIALTDKFVK	Bacteria	Superkingdom	Bacteria								NA	NA	NA	NA	NA	10.8991	11.547	NA	NA	NA	NA	NA	NA	NA	NA	NA	NA	11.1732	11.8335	NA	11.0946	NA	11.6236	14.045
AGIDDKYLEQYGK	Clostridiales	Order	Bacteria		Firmicutes	Clostridia	Clostridiales				NA	10.4203	NA	NA	12.1716	11.9554	14.0232	NA	11.0554	NA	13.0487	10.3526	13.2145	12.3588	13.3931	11.7821	NA	11.6451	13.394	11.9352	10.8358	NA	12.7454	11.8701
AGIDGESIGNCPFSQR	Chordata	Phylum	Eukaryota	Metazoa	Chordata						10.5775	11.5692	10.1522	10.6153	NA	11.6406	NA	NA	NA	NA	10.2317	NA	NA	NA	NA	NA	NA	NA	11.0431	11.1344	NA	NA	11.586	11.1899
AGIEINRK	Bacteria	Superkingdom	Bacteria								15.1942	16.2991	15.497	16.5047	15.4157	16.3482	13.0545	NA	NA	12.4457	15.4564	NA	15.4564	15.3211	16.6821	15.1095	14.5257	13.4992	15.8566	16.5449	15.9239	13.4084	NA	16.2765
AGIEVGTEK	Clostridiales	Order	Bacteria		Firmicutes	Clostridia	Clostridiales				13.4876	12.8433	12.9129	13.4932	15.2636	14.8544	16.0609	12.8517	15.8428	13.9506	14.9325	14.7112	NA	15.3667	15.6351	14.3917	15.2725	16.0813	15.1343	15.3846	15.0825	14.7373	14.5073	14.8267
AGIEWLNK	Lachnospiraceae bacterium 3-1	Species	Bacteria		Firmicutes	Clostridia	Clostridiales	Lachnospiraceae		Lachnospiraceae bacterium 3-1	NA	NA	NA	NA	NA	NA	NA	NA	NA	NA	NA	NA	NA	NA	9.87154	NA	NA	NA	NA	NA	11.5681	NA	NA	12.1675
AGIEYTIK	Clostridiales	Order	Bacteria		Firmicutes	Clostridia	Clostridiales				NA	11.8345	NA	11.8088	NA	NA	NA	NA	10.809	NA	12.4804	NA	NA	NA	NA	NA	NA	NA	10.8275	NA	NA	NA	NA	NA
AGIFQSAK	Mammalia	Class	Eukaryota	Metazoa	Chordata	Mammalia					13.5413	17.0176	16.2014	16.6616	15.2596	15.5699	12.4453	NA	NA	14.5765	14.6583	NA	14.908	15.2163	14.6834	15.3099	13.9094	15.6283	14.8313	15.2694	13.0655	14.7043	15.6934	15.3058
AGIISTVEVLK	Chordata	Phylum	Eukaryota	Metazoa	Chordata						NA	NA	NA	NA	NA	NA	NA	NA	NA	NA	NA	NA	NA	NA	NA	NA	NA	NA	NA	NA	11.2365	NA	NA	NA
AGILDPVK	Bacteria	Superkingdom	Bacteria								14.5279	13.975	14.0629	13.8761	14.7486	14.9682	NA	15.0212	14.5785	13.6552	14.6583	11.8769	14.999	14.8223	14.1417	15.3001	13.4473	13.9026	15.0177	NA	NA	15.1569	15.1677	16.7876
AGILESTFR	Butyricicoccus pullicaecorum	Species	Bacteria		Firmicutes	Clostridia	Clostridiales	Clostridiaceae	Butyricicoccus	Butyricicoccus pullicaecorum	13.7159	12.9225	11.8629	13.9625	13.7384	14.0249	15.5311	NA	NA	12.5749	NA	NA	NA	13.7492	13.4987	13.8059	13.1935	12.4338	13.0003	13.4246	12.2574	13.5381	13.9781	15.1255
AGILGGTGMVGQR	Clostridiales	Order	Bacteria		Firmicutes	Clostridia	Clostridiales				NA	NA	NA	NA	NA	NA	13.2752	NA	NA	NA	12.1712	NA	NA	NA	13.4999	14.0558	NA	NA	NA	NA	NA	NA	13.4777	12.654
AGIMDNVVVR	Dorea sp. 5-2	Species	Bacteria		Firmicutes	Clostridia	Clostridiales	Lachnospiraceae	Dorea	Dorea sp. 5-2	NA	12.5973	NA	12.9428	14.6425	15.9847	15.1298	15.4645	15.0238	NA	13.688	13.4238	15.0778	14.7057	14.8766	NA	15.0032	15.1957	15.2309	14.4692	14.3297	12.7526	14.6455	14.6587
AGINTVEELTNK	Bacteria	Superkingdom	Bacteria								13.7945	13.8057	13.4178	14.0503	15.3428	14.9391	14.3099	14.0606	14.6208	13.3877	14.417	14.0214	14.8614	15.3261	15.4827	14.3677	14.5227	14.0022	16.2179	14.3214	12.1105	13.7307	14.8684	15.0506
AGINTVEELTNR	Clostridiales	Order	Bacteria		Firmicutes	Clostridia	Clostridiales				16.092	13.0677	13.866	13.9252	15.3279	14.6869	15.9217	14.7122	14.2864	12.8731	15.3616	14.1395	15.2502	15.3939	15.8194	13.8665	14.5303	13.8726	15.9761	15.6341	13.9969	14.3106	15.8996	15.2402
AGINTVEELTNRTPEDMMK	Clostridiales	Order	Bacteria		Firmicutes	Clostridia	Clostridiales				NA	NA	NA	NA	11.5157	11.4969	11.3122	11.3571	NA	NA	NA	NA	10.618	11.0032	11.2022	NA	NA	NA	11.5776	NA	NA	NA	10.9368	11.58
AGIPKEEVK	Metazoa	Kingdom	Eukaryota	Metazoa							NA	12.9003	NA	12.3935	NA	12.6731	NA	NA	NA	NA	NA	NA	NA	NA	NA	NA	NA	NA	NA	NA	NA	NA	NA	NA
AGIPLVEDFYFR	Lachnospiraceae bacterium MD335	Species	Bacteria		Firmicutes	Clostridia	Clostridiales	Lachnospiraceae		Lachnospiraceae bacterium MD335	12.4664	NA	12.9596	NA	15.2058	13.1014	13.6755	12.8762	13.7329	13.3276	13.3048	14.4658	15.3237	15.3954	14.6591	14.7181	15.3451	13.575	15.4869	14.6076	14.4491	14.3156	14.5445	14.1669
AGIPMDEVTTMADVVEPLK	Anaerotruncus sp. G3(2012)	Species	Bacteria		Firmicutes	Clostridia	Clostridiales	Ruminococcaceae	Anaerotruncus	Anaerotruncus sp. G3(2012)	10.9545	12.1392	NA	NA	12.7582	NA	NA	12.8812	10.9796	10.9817	NA	NA	NA	12.6378	13.9118	12.5105	12.3289	NA	12.8996	NA	12.6902	NA	13.4858	13.9022
AGIPVCPPEGDAGTGMVATK	Lachnospiraceae bacterium A2	Species	Bacteria		Firmicutes	Clostridia	Clostridiales	Lachnospiraceae		Lachnospiraceae bacterium A2	9.95362	NA	NA	NA	11.1023	11.1512	13.431	11.1468	NA	NA	NA	NA	NA	11.2232	NA	10.099	NA	NA	11.2287	9.9803	10.6483	NA	NA	NA
AGIPYSVPAYTVGMVCGSGMK	Oscillibacter	Genus	Bacteria		Firmicutes	Clostridia	Clostridiales	Oscillospiraceae	Oscillibacter		NA	NA	NA	NA	9.8288	10.9108	11.2778	NA	NA	NA	NA	NA	11.7832	11.406	NA	NA	NA	NA	NA	NA	NA	NA	11.4531	NA
AGIQLDPTFVK	Bacteria	Superkingdom	Bacteria								11.4038	13.0352	13.2421	14.0692	NA	11.942	12.3322	NA	11.7286	NA	13.0495	NA	13.8249	12.2652	13.819	13.7858	NA	NA	12.8904	13.9585	11.827	NA	12.3681	NA
AGIQQEIR	Bacteria	Superkingdom	Bacteria								18.4846	17.1117	17.0606	17.4449	19.1098	19.09	19.5428	18.5007	18.9904	16.6623	18.5608	18.1813	19.5209	NA	19.2186	17.9807	17.7052	18.1852	19.7968	18.7873	18.1154	17.576	19.1632	19.235
AGITGVEIAAR	Clostridiales	Order	Bacteria		Firmicutes	Clostridia	Clostridiales				13.0789	13.2848	12.4441	12.8732	15.0189	13.6721	15.7647	NA	12.8102	NA	14.4234	NA	15.4482	15.1184	16.1383	14.3573	13.3709	NA	15.4977	14.1312	12.2769	11.9445	14.5548	14.5314
AGITLLEK	Bacteria	Superkingdom	Bacteria								11.4081	NA	NA	NA	12.2535	NA	NA	NA	NA	12.8644	11.9079	NA	12.8747	12.5401	11.6114	12.7712	12.3689	NA	12.9838	12.5559	NA	12.4834	12.3222	NA
AGITPIITPVADLVK	Lachnospiraceae bacterium MD335	Species	Bacteria		Firmicutes	Clostridia	Clostridiales	Lachnospiraceae		Lachnospiraceae bacterium MD335	17.0378	10.2826	17.5669	12.9914	16.9097	14.9811	16.7708	16.7212	17.66	17.2302	17.7902	17.4429	16.6185	17.3742	16.6376	19.5492	18.1627	17.1792	18.4304	18.0451	18.84	17.9167	17.0798	17.3356
AGIVDPTMVTR	Lactobacillus	Genus	Bacteria		Firmicutes	Bacilli	Lactobacillales	Lactobacillaceae	Lactobacillus		14.6857	16.0419	14.6381	14.0177	NA	NA	12.3299	14.341	NA	NA	14.3937	14.6536	13.2293	NA	13.5568	13.8768	12.8338	12.3919	NA	13.9187	14.3658	13.5504	12.9814	13.1329
AGIYYMNYDGFNTFSILK	Mus musculus	Species	Eukaryota	Metazoa	Chordata	Mammalia	Rodentia	Muridae	Mus	Mus musculus	NA	NA	NA	NA	NA	NA	NA	NA	NA	NA	NA	NA	12.0376	NA	NA	NA	NA	NA	NA	NA	NA	NA	NA	NA
AGLAPLEVR	Mammalia	Class	Eukaryota	Metazoa	Chordata	Mammalia					13.3753	15.0442	14.1687	13.5775	NA	14.8982	NA	NA	NA	NA	12.1859	NA	13.6452	NA	NA	NA	NA	NA	13.6452	NA	NA	NA	NA	14.0442
AGLDALLK	Bacteria	Superkingdom	Bacteria								NA	NA	NA	NA	NA	NA	NA	NA	NA	NA	NA	NA	NA	NA	13.307	NA	NA	NA	NA	NA	NA	NA	NA	NA
AGLDVDDFAGR	Mucispirillum schaedleri	Species	Bacteria		Deferribacteres	Deferribacteres	Deferribacterales	Deferribacteraceae	Mucispirillum	Mucispirillum schaedleri	11.7768	NA	NA	NA	12.7468	12.1789	12.6817	13.1051	NA	12.7731	11.9521	12.9757	12.9318	12.7266	13.2608	12.3477	12.6582	14.0166	11.5641	12.797	11.5611	12.199	12.7367	14.4448
AGLEAALR	Bacteria	Superkingdom	Bacteria								16.5597	15.0933	16.286	15.3828	17.3468	17.0997	17.1742	NA	NA	15.9411	16.8611	18.2808	NA	17.4035	17.379	16.9915	17.0116	16.8613	17.1365	17.0716	NA	16.2886	15.5055	16.7658
AGLEGFEK	Bacteria	Superkingdom	Bacteria								NA	NA	NA	NA	14.8377	NA	NA	NA	13.7591	NA	NA	13.9004	14.3667	14.4555	NA	14.5331	13.4423	NA	13.9406	13.7807	13.6551	14.2316	13.9324	NA
AGLEQGSDAGYLAESQK	Rodentia	Order	Eukaryota	Metazoa	Chordata	Mammalia	Rodentia				10.6982	13.1023	12.1862	12.9291	10.22	13.126	9.33242	NA	NA	NA	9.59959	9.78678	11.0969	9.51673	11.098	9.67408	NA	10.9816	11.6727	10.5703	NA	NA	11.388	12.2287
AGLESTLAETECR	Mammalia	Class	Eukaryota	Metazoa	Chordata	Mammalia					13.437	13.3488	12.7852	12.3172	12.0946	13.8082	11.8758	12.4843	11.9881	13.9679	12.4776	12.9255	11.23	12.0445	NA	11.8853	13.4117	13.2911	12.4868	12.4962	13.2745	12.7632	12.6894	12.5362
AGLGAAQNR	Bacteria	Superkingdom	Bacteria								NA	15.5675	15.1566	16.0225	16.2986	15.8782	14.3986	NA	NA	14.1424	NA	NA	NA	15.4606	15.5763	15.1839	15.9797	16.2033	16.5628	14.7701	NA	14.0869	NA	NA
AGLGALQNR	Bacteria	Superkingdom	Bacteria								15.0295	18.4277	16.3813	20.3602	15.3914	19.2226	13.6336	18.9519	17.6543	17.2961	19.4658	16.7594	14.282	15.4153	14.8246	16.0413	17.7647	18.673	19.6515	16.72	NA	14.2363	16.6215	13.9432
AGLGEEFGYPIGTNVEGK	Clostridiales	Order	Bacteria		Firmicutes	Clostridia	Clostridiales				NA	NA	NA	NA	NA	12.9863	NA	13.242	13.1385	NA	NA	13.2512	13.881	14.1193	13.2272	NA	NA	NA	14.5351	NA	13.2411	NA	13.5304	13.6246
AGLILFGNDDR	Mammalia	Class	Eukaryota	Metazoa	Chordata	Mammalia					12.1751	13.4525	12.557	12.7387	9.30226	12.7849	NA	11.9032	11.9495	10.3638	12.019	11.9696	12.9378	NA	10.7511	NA	NA	12.2851	12.2694	11.8237	NA	NA	13.1381	12.2579
AGLLGLLEEMR	Chordata	Phylum	Eukaryota	Metazoa	Chordata						NA	NA	13.6395	10.3872	11.2909	11.8695	NA	12.4429	8.15428	NA	NA	NA	8.39183	11.1379	10.9315	NA	12.1646	10.2697	10.5148	NA	7.65731	11.1927	9.6476	NA
AGLLGLLEEMRDEK	Chordata	Phylum	Eukaryota	Metazoa	Chordata						NA	NA	NA	NA	NA	12.6948	NA	11.9449	NA	NA	NA	NA	NA	NA	NA	NA	NA	9.68439	10.2319	NA	NA	NA	NA	10.4582
AGLLGLLEEMRDER	Chordata	Phylum	Eukaryota	Metazoa	Chordata						NA	NA	NA	NA	NA	13.2583	NA	13.8635	NA	NA	NA	NA	NA	NA	NA	NA	NA	NA	NA	NA	NA	NA	NA	NA
AGLMFPNMEAYAVSPAR	Mus musculus	Species	Eukaryota	Metazoa	Chordata	Mammalia	Rodentia	Muridae	Mus	Mus musculus	NA	10.4837	NA	10.8608	NA	12.062	NA	NA	NA	NA	NA	NA	NA	NA	NA	NA	NA	NA	NA	NA	NA	NA	NA	9.95898
AGLNCSTETMPIK	Metazoa	Kingdom	Eukaryota	Metazoa							9.82804	10.5591	NA	10.9236	NA	11.203	NA	NA	NA	NA	NA	NA	NA	NA	NA	NA	NA	NA	NA	NA	NA	NA	11.1188	10.845
AGLNVAEEGAR	Mus musculus	Species	Eukaryota	Metazoa	Chordata	Mammalia	Rodentia	Muridae	Mus	Mus musculus	15.7503	16.546	15.488	16.6108	15.6429	15.5852	12.9427	NA	15.5153	14.4947	15.2693	15.2822	15.9645	15.7278	15.67	15.9358	15.2029	14.8087	15.3568	15.7742	14.5972	15.4541	16.8124	16.2488
AGLPNEVPAVTLNVVCGSGLK	Eubacterium plexicaudatum	Species	Bacteria		Firmicutes	Clostridia	Clostridiales	Eubacteriaceae	Eubacterium	Eubacterium plexicaudatum	12.9649	13.0748	11.4922	12.8934	14.3139	16.3472	10.3074	14.4922	12.0729	NA	13.4057	NA	14.3225	14.2828	11.8053	14.0365	12.7482	12.4037	14.6631	13.1159	12.7901	14.537	15.0031	16.0561
AGLQDASANPVPLDSVHIK	Mus musculus	Species	Eukaryota	Metazoa	Chordata	Mammalia	Rodentia	Muridae	Mus	Mus musculus	NA	NA	NA	NA	NA	11.0719	NA	NA	NA	NA	NA	NA	NA	NA	NA	NA	NA	NA	NA	NA	NA	NA	NA	NA
AGLSLMWNR	Rodentia	Order	Eukaryota	Metazoa	Chordata	Mammalia	Rodentia				NA	NA	14.4646	NA	14.357	15.1702	NA	15.211	14.4725	NA	NA	13.3196	14.618	NA	15.0602	NA	14.6521	14.1544	13.4942	NA	14.1539	15.0439	13.8579	14.5929
AGLSLTDTFVK	Oscillibacter sp. 1-3	Species	Bacteria		Firmicutes	Clostridia	Clostridiales	Oscillospiraceae	Oscillibacter	Oscillibacter sp. 1-3	NA	NA	NA	NA	NA	12.6086	NA	NA	NA	NA	NA	NA	11.687	NA	NA	NA	NA	NA	NA	NA	NA	NA	NA	NA
AGLYETIGK	Lachnospiraceae bacterium A2	Species	Bacteria		Firmicutes	Clostridia	Clostridiales	Lachnospiraceae		Lachnospiraceae bacterium A2	NA	NA	13.2546	NA	13.8144	NA	14.4202	13.6398	NA	NA	NA	NA	NA	14.135	NA	15.3364	NA	NA	NA	NA	13.8879	NA	NA	NA
AGLYGLPK	Mammalia	Class	Eukaryota	Metazoa	Chordata	Mammalia					NA	12.3497	11.6497	11.6462	NA	NA	NA	NA	NA	NA	NA	NA	NA	NA	NA	NA	NA	NA	NA	NA	NA	NA	NA	NA
AGMDAVVLPDK	Lachnospiraceae bacterium A4	Species	Bacteria		Firmicutes	Clostridia	Clostridiales	Lachnospiraceae		Lachnospiraceae bacterium A4	NA	NA	NA	NA	10.6395	NA	NA	NA	NA	NA	NA	11.3087	NA	NA	NA	NA	NA	NA	NA	NA	NA	NA	11.7236	NA
AGMDAVVLPDKIDQPFVSQLESK	Lachnospiraceae bacterium A4	Species	Bacteria		Firmicutes	Clostridia	Clostridiales	Lachnospiraceae		Lachnospiraceae bacterium A4	14.6372	NA	NA	NA	12.9565	12.7647	14.3415	11.1641	11.0907	NA	12.1831	13.8182	12.8695	13.2919	10.4286	NA	11.7641	12.0296	13.8006	14.2718	NA	10.5323	NA	NA
AGMGALQNR	Bacteriovorax sp. Seq25_V	Species	Bacteria		Proteobacteria	Oligoflexia	Bacteriovoracales	Bacteriovoracaceae	Bacteriovorax	Bacteriovorax sp. Seq25_V	16.7513	17.5328	18.856	18.7425	NA	18.4414	16.933	17.9655	16.5985	17.1758	17.7368	NA	17.542	NA	17.5228	16.1632	16.7344	17.2742	NA	17.1028	15.3372	NA	16.6548	16.3878
AGMIFYR	Eukaryota	Superkingdom	Eukaryota								NA	NA	NA	NA	NA	12.5369	NA	13.6185	12.7476	NA	NA	12.4327	12.1964	NA	NA	NA	NA	NA	NA	NA	12.3077	NA	12.8211	13.0834
AGMPQASPALLEPIGNLK	Anaerotruncus sp. G3(2012)	Species	Bacteria		Firmicutes	Clostridia	Clostridiales	Ruminococcaceae	Anaerotruncus	Anaerotruncus sp. G3(2012)	NA	NA	NA	NA	10.0172	NA	NA	9.77956	NA	NA	NA	NA	NA	10.7283	10.4335	NA	9.2524	NA	11.9968	NA	NA	NA	11.0628	13.2085
AGMQDSECIIAVNK	Clostridiales	Order	Bacteria		Firmicutes	Clostridia	Clostridiales				11.8969	12.3387	12.1571	12.574	13.7434	13.1586	13.2445	12.1382	12.646	NA	13.421	12.0075	14.9707	13.9125	11.1959	12.3114	11.9347	11.3286	14.2485	11.7343	11.1623	10.543	13.9407	13.2404
AGMQDSECIVAVNK	Butyricicoccus pullicaecorum	Species	Bacteria		Firmicutes	Clostridia	Clostridiales	Clostridiaceae	Butyricicoccus	Butyricicoccus pullicaecorum	12.8752	11.8454	NA	11.2782	12.5138	NA	13.4392	NA	12.9064	NA	10.5996	NA	12.9722	12.7166	NA	NA	11.8298	NA	12.2944	NA	NA	NA	11.8957	NA
AGMSTAQAQHFLEK	Mus musculus	Species	Eukaryota	Metazoa	Chordata	Mammalia	Rodentia	Muridae	Mus	Mus musculus	NA	NA	NA	NA	NA	12.0948	NA	11.5187	11.1345	NA	NA	12.0501	12.0632	NA	NA	NA	NA	12.0993	11.5474	11.1823	NA	NA	10.5017	11.7874
AGNAILIK	Bacteria	Superkingdom	Bacteria								NA	11.8515	11.9084	11.1684	12.4176	14.0997	14.1152	13.5355	12.6744	13.8648	11.2975	12.8459	NA	12.6744	12.402	13.4685	12.5417	13.1833	12.807	12.9053	11.1161	12.5422	11.1205	12.122
AGNASVTIR	Lachnospiraceae bacterium MD335	Species	Bacteria		Firmicutes	Clostridia	Clostridiales	Lachnospiraceae		Lachnospiraceae bacterium MD335	12.071	NA	13.5027	NA	12.9778	NA	NA	NA	NA	13.6454	13.5615	NA	NA	12.5776	NA	NA	14.3573	NA	13.0763	12.6923	NA	13.3185	NA	NA
AGNDANVAALGEMWCGGGK	Lachnospiraceae	Family	Bacteria		Firmicutes	Clostridia	Clostridiales	Lachnospiraceae			11.5364	NA	NA	NA	12.1556	NA	12.737	NA	9.65186	NA	10.9097	11.1457	10.4604	12.1501	NA	9.96916	10.3927	NA	11.1482	11.7644	9.69669	10.2206	11.0971	NA
AGNGVILITTK	Bacteroidetes	Phylum	Bacteria		Bacteroidetes						12.2481	13.4119	13.7193	13.9835	12.3103	12.4541	10.6061	NA	13.514	11.346	13.4961	NA	NA	12.6376	13.4499	12.5767	13.7274	NA	NA	12.2789	13.3905	NA	NA	13.5396
AGNILLTEPGQVK	Chordata	Phylum	Eukaryota	Metazoa	Chordata						NA	NA	NA	NA	NA	NA	NA	NA	NA	NA	NA	NA	10.8533	NA	NA	NA	NA	NA	NA	NA	NA	NA	11.048	10.9863
AGNLGGGVVTIER	Metazoa	Kingdom	Eukaryota	Metazoa							13.79	15.7538	14.9457	NA	13.5705	15.0917	11.8305	13.5288	13.7046	12.7789	12.939	13.5301	13.8101	13.6699	14.1926	NA	NA	13.9994	13.4061	12.8802	13.3832	12.9349	14.2791	14.0826
AGNQVPTTDVLDK	Lachnospiraceae bacterium MD335	Species	Bacteria		Firmicutes	Clostridia	Clostridiales	Lachnospiraceae		Lachnospiraceae bacterium MD335	13.3359	NA	14.1174	NA	12.4508	12.3809	12.9536	13.6961	13.7915	13.9759	14.5883	14.4917	NA	12.9243	NA	NA	14.5805	NA	15.028	13.6744	13.9429	12.8249	NA	NA
AGNVYYGSMDVTLEK	Mucispirillum schaedleri	Species	Bacteria		Deferribacteres	Deferribacteres	Deferribacterales	Deferribacteraceae	Mucispirillum	Mucispirillum schaedleri	NA	9.39698	NA	NA	NA	NA	NA	10.0097	NA	9.04156	NA	NA	NA	NA	NA	NA	NA	NA	NA	NA	NA	NA	NA	10.1173
AGNYDIAR	Lachnospiraceae bacterium MD335	Species	Bacteria		Firmicutes	Clostridia	Clostridiales	Lachnospiraceae		Lachnospiraceae bacterium MD335	14.1147	NA	14.8678	NA	14.6097	14.5847	14.2803	NA	14.5724	14.3742	14.2463	NA	13.7279	14.4795	13.7822	15.1326	15.2068	13.9123	14.8512	15.0721	15.2821	14.6304	NA	14.1441
AGPIWDLR	Chordata	Phylum	Eukaryota	Metazoa	Chordata						NA	12.0213	10.9908	11.4301	NA	11.5411	NA	NA	NA	NA	NA	NA	NA	NA	NA	NA	NA	NA	NA	NA	NA	NA	NA	NA
AGPNIYELR	Chordata	Phylum	Eukaryota	Metazoa	Chordata						12.9794	14.2461	13.3125	13.8029	NA	14.2415	NA	NA	12.9174	11.6967	NA	NA	14.6502	NA	12.4088	NA	NA	13.2121	13.4481	NA	NA	10.2032	14.3728	13.2705
AGPTSLPLGK	Mammalia	Class	Eukaryota	Metazoa	Chordata	Mammalia					NA	11.7284	10.8742	11.3999	NA	11.8208	NA	NA	NA	NA	NA	NA	NA	NA	NA	NA	NA	NA	11.0059	NA	NA	NA	NA	11.3698
AGPVLLEPIMK	Bacteria	Superkingdom	Bacteria								NA	NA	NA	13.3706	NA	12.7391	NA	NA	14.6639	NA	15.3007	15.243	14.4157	NA	NA	14.0611	14.4566	14.5422	16.6356	14.6919	13.9684	NA	13.9039	14.742
AGPVLMEPIMK	Bacteria	Superkingdom	Bacteria								14.3004	14.704	15.5934	14.8936	13.6273	12.5167	NA	NA	12.9866	11.299	15.2486	NA	14.7053	13.7484	15.1425	NA	13.0059	11.5737	14.5325	13.9439	12.6796	NA	13.9998	15.3344
AGPVWFYYEVGNADR	Lachnospiraceae bacterium A4	Species	Bacteria		Firmicutes	Clostridia	Clostridiales	Lachnospiraceae		Lachnospiraceae bacterium A4	NA	NA	11.7751	11.557	12.1294	12.0712	9.74796	NA	NA	NA	NA	NA	NA	12.3241	NA	NA	NA	NA	NA	NA	NA	NA	NA	NA
AGQAVDDFIEK	Chordata	Phylum	Eukaryota	Metazoa	Chordata						13.6437	16.2089	14.8877	15.6313	12.8097	14.8813	NA	NA	NA	NA	12.8389	NA	13.6437	12.935	13.6573	NA	13.0449	13.203	13.8846	13.0952	NA	12.1559	13.2895	14.1953
AGQETIQNSSSSMQVGSR	Roseburia	Genus	Bacteria		Firmicutes	Clostridia	Clostridiales	Lachnospiraceae	Roseburia		12.6433	NA	NA	NA	10.1595	10.9361	13.6415	10.7414	NA	NA	12.9385	12.4538	8.83157	10.0048	NA	NA	NA	NA	11.2615	13.0069	NA	11.3546	11.0117	10.8775
AGQGFTTEPVDLR	Lactobacillus reuteri	Species	Bacteria		Firmicutes	Bacilli	Lactobacillales	Lactobacillaceae	Lactobacillus	Lactobacillus reuteri	13.4879	14.293	11.9067	11.7893	NA	NA	11.7838	12.5196	NA	NA	12.6533	13.05	11.3674	NA	NA	11.0639	11.9672	10.5363	11.9823	12.2436	12.6224	11.623	NA	11.3314
AGQTIFIK	Lachnospiraceae bacterium A4	Species	Bacteria		Firmicutes	Clostridia	Clostridiales	Lachnospiraceae		Lachnospiraceae bacterium A4	11.5691	9.78371	13.1583	12.4354	12.8082	12.1686	12.7021	12.399	NA	NA	NA	NA	NA	12.8514	NA	NA	NA	NA	NA	11.7657	NA	NA	NA	NA
AGQTTYSGVVDCFR	Chordata	Phylum	Eukaryota	Metazoa	Chordata						NA	10.2809	NA	NA	NA	NA	NA	NA	NA	NA	NA	NA	NA	NA	NA	NA	NA	NA	NA	NA	NA	NA	NA	NA
AGQVAYLEK	Metazoa	Kingdom	Eukaryota	Metazoa							11.6302	12.5791	NA	NA	NA	12.7712	NA	NA	NA	NA	NA	NA	NA	NA	NA	NA	NA	NA	NA	NA	NA	NA	NA	NA
AGQVEYRVDK	Lactobacillus	Genus	Bacteria		Firmicutes	Bacilli	Lactobacillales	Lactobacillaceae	Lactobacillus		12.5089	NA	NA	NA	NA	NA	10.6777	NA	NA	NA	12.6612	NA	NA	NA	NA	NA	NA	NA	12.5069	10.8903	NA	NA	NA	NA
AGQYYVNQR	Bacteria	Superkingdom	Bacteria								14.9789	15.5376	NA	NA	NA	NA	13.5845	15.1706	NA	NA	15.0498	14.6226	14.2112	NA	13.9904	NA	14.2085	13.0033	14.6336	14.736	15.7698	13.6491	13.6268	NA
AGSCTITVK	Lachnospiraceae bacterium A4	Species	Bacteria		Firmicutes	Clostridia	Clostridiales	Lachnospiraceae		Lachnospiraceae bacterium A4	NA	NA	NA	NA	11.9489	12.1442	12.6571	NA	NA	11.335	NA	NA	NA	11.7352	NA	NA	11.2412	10.558	NA	NA	NA	12.6916	NA	NA
AGSDGESIGNCPFSQR	Metazoa	Kingdom	Eukaryota	Metazoa							NA	9.42523	NA	NA	NA	NA	NA	NA	NA	NA	NA	NA	NA	NA	NA	NA	NA	NA	NA	NA	NA	NA	NA	NA
AGSDNILDVTK	Bacteroides	Genus	Bacteria		Bacteroidetes	Bacteroidia	Bacteroidales	Bacteroidaceae	Bacteroides		NA	NA	NA	NA	NA	NA	NA	NA	15.1948	14.4604	14.7745	13.2774	15.6626	13.7309	15.6182	15.2818	13.5647	NA	12.8812	14.29	10.8576	NA	13.4208	14.7411
AGSDSFRPGEWDDR	Mus musculus	Species	Eukaryota	Metazoa	Chordata	Mammalia	Rodentia	Muridae	Mus	Mus musculus	NA	NA	NA	NA	NA	NA	NA	12.2945	NA	NA	NA	NA	11.7033	NA	NA	NA	NA	NA	NA	NA	NA	NA	11.8542	NA
AGSEVMMAVNLGTR	Clostridiales	Order	Bacteria		Firmicutes	Clostridia	Clostridiales				NA	NA	NA	NA	NA	NA	NA	NA	NA	NA	NA	NA	NA	NA	NA	NA	NA	NA	NA	NA	NA	NA	11.2469	NA
AGSIPWTYAPVTDLGR	Bacteria	Superkingdom	Bacteria								NA	NA	NA	NA	NA	12.795	NA	NA	NA	NA	NA	NA	11.4999	NA	11.1258	NA	NA	NA	NA	NA	NA	NA	NA	12.1624
AGSIPWTYAPVVDLGR	Bacteroidaceae	Family	Bacteria		Bacteroidetes	Bacteroidia	Bacteroidales	Bacteroidaceae			NA	14.3323	13.1669	14.1525	12.6385	13.4486	NA	13.671	13.1082	13.6867	12.702	12.7332	12.7689	13.1701	12.3627	12.006	13.1199	NA	13.1283	NA	12.6448	12.9866	11.4765	11.5384
AGSNILGNSPSLPVAK	Mus musculus	Species	Eukaryota	Metazoa	Chordata	Mammalia	Rodentia	Muridae	Mus	Mus musculus	11.0437	12.5626	12.3154	12.9729	11.7127	12.1761	10.2234	11.0663	11.5065	11.5352	11.0378	11.2873	12.0503	11.3747	11.6658	11.6214	11.0057	11.8983	11.1055	10.7299	10.9895	11.416	12.4628	12.0039
AGSSSGSGVQGASAGGLAADASR	Mus musculus	Species	Eukaryota	Metazoa	Chordata	Mammalia	Rodentia	Muridae	Mus	Mus musculus	11.2031	10.8105	12.0962	NA	NA	10.671	9.59484	NA	NA	12.9443	9.67006	10.9518	NA	NA	NA	NA	NA	10.9736	12.7986	NA	NA	NA	NA	10.6721
AGSSSGSGVQGASAGGLAADASRR	Mus musculus	Species	Eukaryota	Metazoa	Chordata	Mammalia	Rodentia	Muridae	Mus	Mus musculus	10.7124	NA	NA	NA	NA	9.67862	NA	NA	NA	12.0422	NA	10.5933	NA	NA	NA	NA	NA	10.2469	11.1511	NA	NA	NA	NA	9.08519
AGSTIEALAK	Lysobacter arseniciresistens	Species	Bacteria		Proteobacteria	Gammaproteobacteria	Xanthomonadales	Xanthomonadaceae	Lysobacter	Lysobacter arseniciresistens	15.3034	13.8517	13.5882	13.8477	15.6926	14.328	15.7486	15.0026	14.5823	NA	15.6247	12.8425	16.4216	15.3478	17.3633	15.1494	NA	NA	15.1482	12.7926	13.0334	12.7917	16.2359	13.3265
AGSTIEGLAK	Bacteria	Superkingdom	Bacteria								17.6326	14.3569	15.6137	14.6392	18.0791	16.8432	18.0773	16.2369	17.1335	15.7763	17.1902	18.3496	17.7404	18.1981	16.4888	16.3633	17.2499	16.8315	17.711	18.4071	16.1277	16.941	17.6552	15.6237
AGSTLTTGQALK	Lachnospiraceae	Family	Bacteria		Firmicutes	Clostridia	Clostridiales	Lachnospiraceae			NA	NA	11.3771	11.8145	12.408	13.0139	NA	12.1013	12.921	9.66667	12.7979	12.1405	12.1153	12.3792	12.4901	12.0945	13.2523	11.6473	13.5133	12.8667	NA	NA	13.577	NA
AGSVECIGSDER	Oscillibacter valericigenes	Species	Bacteria		Firmicutes	Clostridia	Clostridiales	Oscillospiraceae	Oscillibacter	Oscillibacter valericigenes	10.6013	NA	NA	NA	11.9332	NA	12.4723	NA	11.6276	NA	12.1923	10.9236	12.9527	11.9777	10.9825	NA	11.4237	11.7678	12.9498	11.073	NA	NA	12.7045	NA
AGSVECIGSDERR	Oscillibacter valericigenes	Species	Bacteria		Firmicutes	Clostridia	Clostridiales	Oscillospiraceae	Oscillibacter	Oscillibacter valericigenes	NA	NA	NA	NA	NA	NA	11.4499	NA	NA	NA	NA	NA	11.0814	NA	NA	NA	NA	NA	NA	NA	NA	NA	11.2145	NA
AGSVVYIR	Lachnospiraceae bacterium MD335	Species	Bacteria		Firmicutes	Clostridia	Clostridiales	Lachnospiraceae		Lachnospiraceae bacterium MD335	12.5229	NA	13.3311	NA	NA	NA	NA	NA	12.3608	11.8079	NA	12.4229	NA	NA	12.0386	12.4553	13.4871	NA	12.8601	12.7691	NA	NA	NA	11.7406
AGTASVTIR	Lachnospiraceae bacterium MD335	Species	Bacteria		Firmicutes	Clostridia	Clostridiales	Lachnospiraceae		Lachnospiraceae bacterium MD335	NA	NA	NA	NA	14.0015	NA	NA	NA	NA	13.2874	NA	NA	NA	13.6288	NA	13.9701	14.6359	12.9471	NA	13.6158	NA	13.29	NA	NA
AGTATITATAK	Firmicutes	Phylum	Bacteria		Firmicutes						NA	12.6271	13.5242	11.2348	14.1315	NA	NA	NA	NA	13.4729	NA	NA	NA	14.0631	NA	NA	14.6707	13.2834	12.0669	NA	NA	NA	NA	12.4933
AGTATVTVTGK	Lachnospiraceae bacterium A2	Species	Bacteria		Firmicutes	Clostridia	Clostridiales	Lachnospiraceae		Lachnospiraceae bacterium A2	NA	NA	NA	NA	NA	12.6151	NA	NA	NA	NA	NA	NA	NA	NA	NA	12.9747	NA	NA	NA	NA	NA	NA	NA	NA
AGTDAITDSMK	Lactobacillus	Genus	Bacteria		Firmicutes	Bacilli	Lactobacillales	Lactobacillaceae	Lactobacillus		14.1926	16.6587	14.5868	14.8698	13.3141	NA	13.7087	15.8723	11.6554	12.5268	16.0476	15.0403	15.2685	13.1821	15.2071	15.0873	15.4225	14.2015	15.7044	15.6106	16.0367	14.9879	14.6052	13.9923
AGTDPELVYQAIR	Clostridiales	Order	Bacteria		Firmicutes	Clostridia	Clostridiales				13.7956	NA	12.7661	12.4711	14.9948	14.6784	14.7848	13.4922	14.1962	13.2798	14.0421	14.3911	14.9184	14.9005	15.1928	13.9772	14.2733	15.2743	14.4019	14.3091	13.4301	14.0036	14.2158	13.0304
AGTFEIQDLDGNK	Lachnospiraceae bacterium MD335	Species	Bacteria		Firmicutes	Clostridia	Clostridiales	Lachnospiraceae		Lachnospiraceae bacterium MD335	16.8596	NA	17.7958	13.7454	18.9001	16.4298	15.9825	15.8845	17.3076	17.7497	17.5418	17.3535	18.899	18.7871	17.7927	18.8795	17.9968	16.7079	18.0887	17.6261	18.5139	17.9565	18.6851	18.5776
AGTFEIQDLDGNKIASATVQAIGAGESAVMTAK	Lachnospiraceae bacterium MD335	Species	Bacteria		Firmicutes	Clostridia	Clostridiales	Lachnospiraceae		Lachnospiraceae bacterium MD335	NA	NA	NA	NA	12.4182	10.3695	10.5484	NA	NA	10.8	10.4024	10.818	12.2918	12.3543	11.3061	11.5151	10.8227	11.0532	11.924	11.0682	11.9924	12.1372	12.9691	12.4545
AGTIGGLLGK	Clostridium bornimense	Species	Bacteria		Firmicutes	Clostridia	Clostridiales	Clostridiaceae	Clostridium	Clostridium bornimense	NA	NA	NA	12.0609	12.3302	12.2294	NA	NA	NA	14.1116	NA	NA	NA	12.335	NA	NA	12.444	13.1517	12.4844	NA	NA	12.1715	NA	11.4681
AGTLQVGDR	Mammalia	Class	Eukaryota	Metazoa	Chordata	Mammalia					NA	NA	NA	14.3866	NA	14.804	NA	NA	NA	NA	14.5916	NA	NA	NA	NA	NA	14.5637	NA	NA	NA	NA	NA	NA	14.1079
AGTLTEAGAK	Clostridiales	Order	Bacteria		Firmicutes	Clostridia	Clostridiales				14.7064	NA	NA	NA	NA	NA	NA	NA	NA	NA	14.4363	NA	NA	NA	NA	NA	NA	NA	NA	NA	NA	NA	NA	NA
AGTLTTEGAK	Lachnospiraceae bacterium MD335	Species	Bacteria		Firmicutes	Clostridia	Clostridiales	Lachnospiraceae		Lachnospiraceae bacterium MD335	NA	NA	NA	NA	NA	NA	NA	NA	NA	NA	NA	NA	NA	NA	NA	12.1097	12.8575	NA	13.103	NA	NA	NA	NA	NA
AGTMTTIHAYTATQK	Lactobacillaceae	Family	Bacteria		Firmicutes	Bacilli	Lactobacillales	Lactobacillaceae			NA	NA	NA	NA	NA	NA	NA	12.2925	NA	NA	NA	13.0505	NA	NA	NA	NA	NA	NA	NA	NA	NA	NA	NA	NA
AGTPLFFDK	Bacteroidetes	Phylum	Bacteria		Bacteroidetes						11.0242	NA	NA	NA	NA	13.0499	NA	12.3071	11.8632	10.9903	11.313	11.0378	12.4593	NA	11.871	NA	NA	NA	NA	NA	NA	NA	12.5013	NA
AGTQELDDQIQANLPDEK	Rodentia	Order	Eukaryota	Metazoa	Chordata	Mammalia	Rodentia				NA	11.1125	NA	11.3235	NA	NA	NA	NA	NA	NA	9.96075	9.35481	10.4554	NA	10.0618	NA	NA	NA	10.4256	9.80247	NA	NA	NA	10.705
AGTQIENIDEDFR	Chordata	Phylum	Eukaryota	Metazoa	Chordata						NA	11.6915	12.0281	NA	NA	NA	NA	NA	NA	NA	NA	NA	NA	NA	NA	NA	NA	NA	NA	NA	NA	NA	NA	NA
AGTQIENIDEDFRDGLK	Chordata	Phylum	Eukaryota	Metazoa	Chordata						11.0527	13.5969	12.1681	13.2625	11.0973	13.5905	NA	NA	NA	NA	10.3534	NA	11.5997	NA	12.2372	NA	NA	12.2867	10.7263	11.2309	NA	NA	11.2418	13.3381
AGTTAEGISK	Fusobacterium ulcerans	Species	Bacteria		Fusobacteria	Fusobacteriia	Fusobacteriales	Fusobacteriaceae	Fusobacterium	Fusobacterium ulcerans	NA	NA	NA	NA	13.5943	NA	NA	NA	NA	NA	NA	NA	NA	13.2089	12.6477	12.4474	11.6913	NA	12.8499	NA	NA	NA	NA	NA
AGTTAESLANLK	Eubacterium plexicaudatum	Species	Bacteria		Firmicutes	Clostridia	Clostridiales	Eubacteriaceae	Eubacterium	Eubacterium plexicaudatum	NA	NA	NA	NA	15.98	NA	13.5202	NA	15.6847	15.9033	NA	NA	17.6699	16.1782	16.2814	NA	16.2679	17.2514	16.2393	15.9189	15.2751	17.6897	18.3248	NA
AGTTIIEVK	Lachnospiraceae bacterium MD335	Species	Bacteria		Firmicutes	Clostridia	Clostridiales	Lachnospiraceae		Lachnospiraceae bacterium MD335	NA	NA	NA	NA	NA	NA	NA	NA	NA	NA	11.9146	NA	NA	NA	NA	NA	NA	NA	NA	11.8847	NA	NA	NA	NA
AGTTLNMIR	Clostridiales	Order	Bacteria		Firmicutes	Clostridia	Clostridiales				12.4747	NA	NA	NA	13.5949	14.3516	13.5939	NA	13.5032	NA	12.8841	NA	13.4109	14.0027	13.6154	NA	12.8205	12.907	13.3936	12.7499	12.211	NA	NA	14.2382
AGTTTIEVK	Komagataeibacter	Genus	Bacteria		Proteobacteria	Alphaproteobacteria	Rhodospirillales	Acetobacteraceae	Komagataeibacter		NA	NA	NA	NA	NA	NA	NA	NA	NA	NA	NA	17.0451	NA	NA	NA	NA	NA	NA	NA	NA	NA	NA	NA	NA
AGTVSMDVAR	Clostridiales	Order	Bacteria		Firmicutes	Clostridia	Clostridiales				NA	11.6873	NA	14.0586	12.7261	14.3901	13.7898	NA	NA	NA	NA	NA	13.6152	12.8687	14.4185	NA	NA	NA	14.0685	12.9139	NA	NA	14.2273	16.0334
AGTVTMDVAK	Bacteria	Superkingdom	Bacteria								15.0619	14.5199	14.416	15.1684	17.0738	16.4053	16.2726	15.3395	15.9243	14.6622	15.4007	15.6243	16.4868	17.1187	16.8195	15.5792	16.057	14.4575	16.9818	15.9597	14.5352	14.0947	15.9242	15.219
AGTVTMDVTK	Bacteria	Superkingdom	Bacteria								17.9837	17.2517	17.3171	17.3397	18.9315	18.6665	19.3688	18.8093	18.6135	16.4612	18.2038	17.7356	19.1672	18.9186	19.2365	17.8854	17.8208	18.1662	19.2936	18.1843	17.7382	17.3398	19.2621	19.0767
AGTVTPDVAK	Bacteria	Superkingdom	Bacteria								14.6985	14.7811	14.2124	15.0233	15.8831	15.2647	15.0267	NA	15.1948	NA	15.1448	14.4124	17.0226	15.7688	16.6375	13.925	13.875	14.0886	16.777	14.2187	13.71	12.7564	14.714	16.1749
AGVAPDQVDQVYMGCVIQAGQGQNVAR	Clostridium	Genus	Bacteria		Firmicutes	Clostridia	Clostridiales	Clostridiaceae	Clostridium		NA	NA	NA	NA	10.4116	10.3923	9.983	NA	NA	NA	NA	NA	NA	10.0046	NA	NA	NA	NA	9.98297	10.0828	NA	NA	NA	NA
AGVAPEQVDHVYMGCVIQAGQGQNVAR	Lachnospiraceae bacterium MD335	Species	Bacteria		Firmicutes	Clostridia	Clostridiales	Lachnospiraceae		Lachnospiraceae bacterium MD335	NA	NA	NA	NA	NA	NA	NA	NA	NA	NA	NA	NA	11.7058	NA	NA	NA	NA	NA	NA	NA	NA	NA	NA	NA
AGVAPEQVDQVYMGCVIQAGLGQNVAR	Lachnospiraceae bacterium 28-4	Species	Bacteria		Firmicutes	Clostridia	Clostridiales	Lachnospiraceae		Lachnospiraceae bacterium 28-4	NA	NA	NA	NA	NA	NA	NA	NA	NA	NA	NA	NA	10.275	11.1954	NA	NA	NA	NA	NA	NA	NA	NA	NA	NA
AGVATPGLTEDQLWR	Rodentia	Order	Eukaryota	Metazoa	Chordata	Mammalia	Rodentia				NA	NA	NA	10.5559	NA	10.9633	NA	NA	NA	NA	NA	NA	NA	NA	NA	NA	NA	NA	10.1448	NA	NA	NA	NA	NA
AGVDMQLPGVR	Lachnospiraceae bacterium MD335	Species	Bacteria		Firmicutes	Clostridia	Clostridiales	Lachnospiraceae		Lachnospiraceae bacterium MD335	NA	NA	NA	NA	10.6246	NA	NA	NA	NA	NA	11.4884	11.5351	NA	10.8475	NA	NA	12.741	NA	14.0692	12.7662	12.741	10.9035	NA	NA
AGVDPLVPLR	Mammalia	Class	Eukaryota	Metazoa	Chordata	Mammalia					NA	10.7283	NA	NA	NA	10.2118	NA	NA	NA	NA	NA	NA	NA	NA	NA	NA	NA	NA	NA	NA	NA	NA	NA	NA
AGVDPNALVVEPYANPFR	Oscillibacter sp. 1-3	Species	Bacteria		Firmicutes	Clostridia	Clostridiales	Oscillospiraceae	Oscillibacter	Oscillibacter sp. 1-3	NA	NA	NA	NA	10.4256	11.1744	NA	NA	NA	NA	NA	NA	10.8153	11.1365	11.1145	9.67731	NA	NA	11.4078	NA	NA	NA	10.3249	NA
AGVDPQLVFEAIR	Bacteria	Superkingdom	Bacteria								NA	11.5652	NA	12.8888	13.1471	12.3689	12.7693	13.8274	12.0397	NA	12.2778	11.1332	13.7772	13.3997	14.3694	12.6982	12.0632	12.3275	13.4467	12.269	11.9491	12.5064	14.4793	15.3968
AGVDVNIK	Prevotella	Genus	Bacteria		Bacteroidetes	Bacteroidia	Bacteroidales	Prevotellaceae	Prevotella		13.6883	15.5416	NA	15.0865	NA	14.0108	NA	14.0978	NA	NA	14.6167	NA	14.6334	14.5316	NA	NA	NA	NA	15.1056	13.8857	NA	NA	14.5705	14.993
AGVFKPVYDDK	Alistipes	Genus	Bacteria		Bacteroidetes	Bacteroidia	Bacteroidales	Rikenellaceae	Alistipes		NA	NA	NA	NA	NA	NA	NA	12.7457	NA	NA	NA	10.6402	NA	NA	NA	NA	NA	NA	NA	NA	NA	NA	NA	NA
AGVGAPVTQVTLQSTQR	Muridae	Family	Eukaryota	Metazoa	Chordata	Mammalia	Rodentia	Muridae			8.97294	10.9689	9.73388	9.55291	NA	10.4961	NA	NA	NA	NA	NA	NA	NA	NA	NA	NA	NA	NA	NA	NA	NA	NA	NA	NA
AGVIFPVGR	Metazoa	Kingdom	Eukaryota	Metazoa							12.6427	13.4023	13.6635	13.4059	NA	13.5489	NA	NA	12.7775	11.8577	NA	NA	NA	NA	11.9277	NA	NA	NA	12.8717	11.8537	12.6646	NA	NA	12.3776
AGVIGAGESAVMTAK	Lachnospiraceae bacterium MD335	Species	Bacteria		Firmicutes	Clostridia	Clostridiales	Lachnospiraceae		Lachnospiraceae bacterium MD335	12.6912	NA	13.357	NA	13.2059	12.5246	11.691	12.1977	NA	13.4237	13.1447	NA	NA	13.5976	NA	13.1116	13.617	12.8303	13.1516	13.4285	NA	NA	NA	13.8795
AGVIGLTQTAAR	Mammalia	Class	Eukaryota	Metazoa	Chordata	Mammalia					12.7656	12.4267	NA	12.0973	NA	NA	NA	NA	NA	NA	NA	NA	NA	NA	NA	NA	NA	12.76	NA	12.0922	NA	NA	NA	NA
AGVKPEQVDEVLMGCVIQAAQGQNVAR	Firmicutes	Phylum	Bacteria		Firmicutes						NA	NA	NA	NA	10.2015	13.0103	NA	12.7346	NA	NA	NA	NA	11.6219	12.0058	NA	NA	NA	NA	11.713	NA	NA	NA	12.1839	11.9916
AGVKPEQVDEVMMGCVIQAAQGQNVAR	Roseburia	Genus	Bacteria		Firmicutes	Clostridia	Clostridiales	Lachnospiraceae	Roseburia		NA	NA	NA	NA	10.3846	NA	NA	NA	NA	NA	NA	NA	11.3137	10.6407	NA	NA	NA	NA	NA	NA	NA	NA	10.6016	NA
AGVLAGHDNR	Metazoa	Kingdom	Eukaryota	Metazoa							NA	NA	NA	NA	NA	14.6072	NA	NA	NA	NA	NA	NA	14.4672	NA	NA	NA	NA	NA	NA	NA	14.5086	NA	14.6278	14.788
AGVLAHLEEER	Metazoa	Kingdom	Eukaryota	Metazoa							NA	NA	NA	NA	NA	NA	NA	12.0107	NA	NA	NA	NA	NA	NA	NA	NA	NA	NA	NA	NA	NA	NA	NA	NA
AGVLAQLEEER	Metazoa	Kingdom	Eukaryota	Metazoa							11.8029	12.9319	12.5072	12.6948	NA	13.4321	NA	NA	NA	NA	NA	NA	12.4435	NA	10.9297	NA	NA	12.1819	12.3923	11.6278	NA	NA	12.1017	12.8912
AGVNFSEFTGVWK	Mammalia	Class	Eukaryota	Metazoa	Chordata	Mammalia					NA	10.9434	NA	NA	NA	11.246	NA	NA	NA	NA	NA	NA	11.6676	NA	11.2657	NA	NA	9.65093	10.8519	NA	NA	NA	10.798	9.95909
AGVNPDIR	Bacteria	Superkingdom	Bacteria								NA	NA	NA	NA	NA	NA	NA	NA	NA	NA	NA	NA	NA	NA	13.8434	NA	NA	NA	NA	NA	NA	NA	NA	NA
AGVNTVTTLVENK	Metazoa	Kingdom	Eukaryota	Metazoa							12.9405	14.8422	14.7243	15.443	12.5305	14.2355	11.2695	12.6207	12.9254	12.8353	12.6875	12.8855	13.4877	12.668	13.2823	12.9002	12.9349	13.1425	12.5874	12.5626	12.8959	12.9059	13.4075	12.8797
AGVNTVTTLVENKK	Metazoa	Kingdom	Eukaryota	Metazoa							NA	NA	NA	NA	NA	NA	NA	10.4136	NA	NA	NA	10.0088	10.3517	NA	NA	NA	NA	NA	NA	NA	NA	NA	10.2357	NA
AGVPTSVPAYTVGMVCGSGMK	Clostridiales	Order	Bacteria		Firmicutes	Clostridia	Clostridiales				NA	10.0133	NA	10.6883	11.1703	11.7839	NA	NA	NA	NA	NA	NA	11.4058	11.5103	10.1306	NA	NA	NA	NA	NA	NA	NA	11.6977	11.9858
AGVQVGTEK	Clostridiales	Order	Bacteria		Firmicutes	Clostridia	Clostridiales				NA	NA	NA	NA	NA	NA	NA	NA	NA	NA	13.1276	NA	NA	NA	NA	NA	NA	12.7536	NA	NA	NA	NA	NA	NA
AGVTAEGIAK	Oscillibacter sp. 1-3	Species	Bacteria		Firmicutes	Clostridia	Clostridiales	Oscillospiraceae	Oscillibacter	Oscillibacter sp. 1-3	15.2987	NA	NA	16.8936	16.3286	16.385	16.4196	16.8419	15.5365	13.9617	16.7318	15.3757	17.3762	16.3293	16.5319	15.5844	NA	15.8114	16.3976	15.9841	14.4125	14.3886	16.8199	18.0574
AGVTAEGISK	Clostridiales	Order	Bacteria		Firmicutes	Clostridia	Clostridiales				NA	14.1911	NA	14.7526	13.3646	13.7809	13.1114	14.0377	12.2561	NA	12.8729	13.111	NA	13.6652	14.5973	13.7822	NA	NA	13.7035	13.9264	NA	12.6492	NA	14.347
AGVTIPQLNSVMGR	Mucispirillum schaedleri	Species	Bacteria		Deferribacteres	Deferribacteres	Deferribacterales	Deferribacteraceae	Mucispirillum	Mucispirillum schaedleri	NA	12.3657	12.3265	NA	12.7999	12.922	13.3493	NA	NA	13.9561	12.814	12.6185	12.8823	12.7694	13.4079	12.4728	13.1086	13.7839	NA	12.7371	13.024	13.4376	13.5504	14.3718
AGVVEGIVYDADGMK	Lachnospiraceae bacterium MD335	Species	Bacteria		Firmicutes	Clostridia	Clostridiales	Lachnospiraceae		Lachnospiraceae bacterium MD335	13.4295	NA	12.0574	11.8426	13.4274	12.9339	13.0581	13.889	12.9666	12.93	13.5633	13.4825	14.761	13.6328	13.2682	14.3022	13.3574	13.4207	14.0761	14.3927	12.7398	12.6182	14.1183	13.7657
AGVVEGNFYDSDGIK	Eubacterium sp. 14-2	Species	Bacteria		Firmicutes	Clostridia	Clostridiales	Eubacteriaceae	Eubacterium	Eubacterium sp. 14-2	NA	NA	NA	NA	12.2099	NA	NA	NA	NA	NA	NA	NA	12.5086	12.1469	13.257	11.8639	13.2459	NA	NA	NA	NA	NA	13.5681	11.7572
AGVVEGNFYDTEAMK	Eubacterium plexicaudatum	Species	Bacteria		Firmicutes	Clostridia	Clostridiales	Eubacteriaceae	Eubacterium	Eubacterium plexicaudatum	NA	NA	11.8363	NA	12.4103	12.9282	NA	11.9013	11.4335	10.8523	12.2731	9.76359	12.89	12.0964	13.3346	13.0556	12.0435	12.9455	12.9016	11.8442	12.3678	12.6189	12.5242	13.9242
AGVVEGTFYDADGIK	Lachnospiraceae bacterium A2	Species	Bacteria		Firmicutes	Clostridia	Clostridiales	Lachnospiraceae		Lachnospiraceae bacterium A2	12.8203	NA	13.4916	NA	13.5172	13.7576	14.9217	14.4418	NA	NA	NA	12.6942	13.3243	13.4587	12.7505	15.0949	NA	13.6457	12.8164	14.02	15.6109	12.9254	13.9005	11.9918
AGVVGPELHEK	Chordata	Phylum	Eukaryota	Metazoa	Chordata						NA	NA	NA	NA	NA	12.6469	NA	NA	NA	NA	NA	NA	NA	NA	NA	NA	NA	11.3363	NA	NA	NA	NA	NA	11.9641
AGVVTMPEYLR	Chordata	Phylum	Eukaryota	Metazoa	Chordata						14.1515	14.8612	14.5712	15.9138	14.3786	15.4643	NA	14.8319	14.4719	14.3441	14.3106	13.7315	14.9678	14.3744	14.3298	14.2752	14.4536	13.9775	14.494	14.3488	13.714	14.9876	14.6539	14.865
AGVVTMPEYLRK	Chordata	Phylum	Eukaryota	Metazoa	Chordata						NA	NA	NA	NA	NA	10.8839	NA	NA	11.3105	NA	10.7211	11.2224	11.0888	NA	NA	NA	NA	11.8035	10.5117	11.3324	11.2934	NA	11.8142	10.9692
AGVYCVGMGSK	Prevotellaceae	Family	Bacteria		Bacteroidetes	Bacteroidia	Bacteroidales	Prevotellaceae			NA	NA	NA	14.4133	12.8635	13.1063	NA	NA	12.0094	NA	12.2125	NA	13.9194	13.1791	NA	NA	NA	NA	13.109	NA	NA	NA	13.513	12.1453
AGWALTDK	Bacteroidales	Order	Bacteria		Bacteroidetes	Bacteroidia	Bacteroidales				13.3146	12.0856	12.7322	11.2627	NA	NA	NA	NA	NA	NA	12.9082	NA	NA	NA	NA	NA	12.2398	NA	12.5019	NA	13.2222	NA	12.4209	12.8743
AGWALTDKR	Bacteroidales	Order	Bacteria		Bacteroidetes	Bacteroidia	Bacteroidales				NA	NA	NA	NA	NA	NA	NA	NA	NA	NA	NA	NA	13.4893	NA	NA	12.5616	NA	NA	13.6971	NA	NA	NA	13.338	14.0465
AGYDNVIK	Lachnospiraceae bacterium MD335	Species	Bacteria		Firmicutes	Clostridia	Clostridiales	Lachnospiraceae		Lachnospiraceae bacterium MD335	14.1899	NA	14.2824	NA	15.1044	NA	14.8755	13.1136	14.8559	NA	NA	NA	14.4251	15.1436	16.2342	14.8212	14.7503	NA	14.1331	NA	NA	NA	15.8714	13.3277
AGYENIIK	Lachnospiraceae bacterium A4	Species	Bacteria		Firmicutes	Clostridia	Clostridiales	Lachnospiraceae		Lachnospiraceae bacterium A4	NA	NA	12.3802	NA	14.7757	14.2004	15.4515	NA	13.9131	NA	NA	NA	NA	14.8385	NA	NA	13.5813	13.7808	NA	NA	NA	13.6434	14.0724	NA
AGYEQIAALFLK	Clostridiales	Order	Bacteria		Firmicutes	Clostridia	Clostridiales				NA	NA	10.7533	NA	NA	NA	NA	NA	NA	NA	NA	NA	NA	NA	9.24569	NA	9.05812	NA	NA	NA	NA	NA	NA	NA
AGYFTHYAGEGTVR	Clostridiales	Order	Bacteria		Firmicutes	Clostridia	Clostridiales				NA	NA	NA	NA	NA	NA	NA	14.1888	NA	NA	NA	NA	NA	NA	NA	NA	NA	NA	NA	NA	NA	NA	NA	NA
AGYIITGQWAK	Clostridiales	Order	Bacteria		Firmicutes	Clostridia	Clostridiales				NA	NA	NA	NA	NA	13.8087	NA	14.0825	NA	NA	NA	NA	NA	NA	NA	NA	NA	NA	NA	NA	13.5467	NA	NA	14.4577
AGYIVTGQWAK	Clostridiales	Order	Bacteria		Firmicutes	Clostridia	Clostridiales				NA	NA	NA	NA	NA	NA	NA	NA	13.4755	NA	NA	NA	13.8385	NA	13.5193	NA	NA	13.4989	12.106	NA	NA	NA	13.8515	NA
AGYKPGEDFK	Clostridiales	Order	Bacteria		Firmicutes	Clostridia	Clostridiales				NA	NA	NA	NA	NA	NA	NA	14.8127	13.8732	NA	NA	13.1697	14.6497	NA	NA	NA	NA	NA	NA	NA	15.0558	NA	14.7769	NA
AGYKPGEQIR	Firmicutes	Phylum	Bacteria		Firmicutes						NA	NA	NA	NA	NA	14.5782	13.8138	13.8215	NA	NA	NA	NA	NA	NA	NA	NA	NA	NA	NA	NA	NA	NA	13.0127	NA
AGYQAFILR	Clostridium sp. D5	Species	Bacteria		Firmicutes	Clostridia	Clostridiales	Clostridiaceae	Clostridium	Clostridium sp. D5	NA	NA	NA	NA	NA	12.0072	12.0714	11.4993	10.3796	NA	NA	11.6331	13.3511	11.9322	NA	NA	NA	NA	NA	NA	10.7117	NA	11.6972	NA
AGYTAIVSHR	Bacteria	Superkingdom	Bacteria								NA	NA	NA	NA	NA	NA	NA	15.1727	13.4213	NA	NA	13.0658	14.868	NA	NA	NA	NA	NA	NA	NA	13.7993	NA	14.3623	NA
AGYTAVISHR	Bacteria	Superkingdom	Bacteria								NA	NA	NA	NA	14.2773	14.6789	NA	NA	NA	NA	NA	NA	NA	13.933	14.437	13.4035	13.3774	NA	NA	NA	NA	NA	NA	16.0251
AGYTDQVVIGMDVAASEFYR	Metazoa	Kingdom	Eukaryota	Metazoa							NA	NA	NA	NA	NA	12.3992	NA	NA	NA	NA	NA	NA	NA	NA	NA	NA	NA	NA	10.5669	NA	NA	NA	NA	10.3001
AGYTSVTSHR	Bacteria	Superkingdom	Bacteria								13.2457	13.3542	NA	NA	NA	13.7523	13.0741	NA	12.5165	13.1968	13.5552	13.4689	13.1437	NA	13.2585	12.8623	NA	12.8626	13.4806	13.3063	NA	12.6235	NA	NA
AGYTTVTSHR	Bacteria	Superkingdom	Bacteria								13.0584	NA	11.6042	13.1037	12.8101	13.6218	12.8807	NA	NA	11.9929	NA	12.1993	11.7835	12.7789	13.0768	12.4532	12.3398	12.1652	NA	11.541	12.2267	10.8357	NA	12.62
AGYVCSGGVCR	Bacteroidales	Order	Bacteria		Bacteroidetes	Bacteroidia	Bacteroidales				14.4976	15.1063	15.8889	15.64	14.7153	13.9682	12.9694	13.8461	14.3362	13.4428	14.4527	12.6264	14.2494	14.6953	NA	14.0255	14.696	11.9732	14.1383	13.7287	13.7241	12.9432	13.6173	13.9949
AGYVNTGVWAK	Bacteria	Superkingdom	Bacteria								12.0109	NA	NA	13.644	12.786	13.4466	11.9582	12.8247	12.4346	12.9366	12.6246	NA	13.0173	12.7022	12.734	11.572	12.6951	NA	12.9546	NA	11.5997	NA	12.7112	12.1267
AGYYDQSGALR	Bacteria	Superkingdom	Bacteria								13.4517	14.7645	12.7909	12.6886	NA	NA	NA	12.9686	NA	NA	12.4956	13.5655	NA	NA	NA	11.6598	12.0427	11.4762	12.7886	12.4101	12.3361	11.8806	12.0311	NA
AHASTAGVADYLPAVSGFLIQK	Clostridiales	Order	Bacteria		Firmicutes	Clostridia	Clostridiales				NA	NA	NA	NA	NA	NA	NA	NA	NA	NA	NA	NA	10.9895	NA	NA	NA	NA	NA	10.3845	NA	NA	NA	NA	NA
AHASVAGVTDVVR	Lachnospiraceae bacterium 10-1	Species	Bacteria		Firmicutes	Clostridia	Clostridiales	Lachnospiraceae		Lachnospiraceae bacterium 10-1	NA	NA	NA	NA	NA	NA	NA	11.9316	NA	NA	NA	NA	13.2598	NA	NA	NA	NA	NA	NA	NA	NA	NA	13.6476	NA
AHASVAGVTK	Clostridiales	Order	Bacteria		Firmicutes	Clostridia	Clostridiales				14.2275	NA	NA	NA	15.0494	13.1733	15.4467	NA	NA	NA	14.9922	NA	15.4932	15.0027	16.0175	14.3771	13.6403	NA	15.3706	13.8616	NA	NA	NA	12.9815
AHASVAVVTK	Butyrivibrio proteoclasticus	Species	Bacteria		Firmicutes	Clostridia	Clostridiales	Lachnospiraceae	Butyrivibrio	Butyrivibrio proteoclasticus	NA	NA	NA	NA	NA	13.9276	NA	NA	13.9648	NA	NA	13.7305	13.6136	NA	NA	NA	NA	NA	NA	NA	13.3386	NA	13.1216	13.4469
AHASVEGVTK	Firmicutes	Phylum	Bacteria		Firmicutes						17.0649	13.8217	14.2292	14.3145	17.5489	16.46	18.4296	NA	NA	15.224	17.4193	NA	NA	17.5444	17.3184	15.7123	17.3894	17.4219	17.855	17.9604	NA	17.014	NA	15.6307
AHCSNVGVTK	Bacteria	Superkingdom	Bacteria								NA	12.0327	11.5664	11.8058	13.311	NA	14.951	NA	NA	13.1907	NA	NA	NA	13.3762	NA	13.0312	13.4292	13.0216	13.9372	13.2634	NA	13.5632	NA	NA
AHCSTVGVTK	Clostridiales	Order	Bacteria		Firmicutes	Clostridia	Clostridiales				NA	12.3191	NA	11.8486	NA	12.6905	11.8318	NA	NA	NA	12.3019	NA	NA	NA	NA	10.9243	NA	11.2735	NA	12.2797	NA	NA	NA	13.8117
AHDEANECNIGDK	Clostridiales	Order	Bacteria		Firmicutes	Clostridia	Clostridiales				NA	NA	NA	10.4639	NA	11.4552	12.0695	12.5086	9.4837	NA	11.1961	NA	NA	NA	NA	10.2889	11.7276	NA	10.5212	NA	9.21509	NA	NA	10.1282
AHDEANECNIGDKVK	Clostridiales	Order	Bacteria		Firmicutes	Clostridia	Clostridiales				NA	NA	NA	NA	NA	11.7634	NA	NA	11.1503	NA	NA	NA	NA	NA	NA	NA	NA	NA	11.136	NA	NA	NA	NA	10.216
AHDEANECNIGDTVK	Dorea sp. 5-2	Species	Bacteria		Firmicutes	Clostridia	Clostridiales	Lachnospiraceae	Dorea	Dorea sp. 5-2	NA	NA	NA	12.2151	NA	10.3187	NA	10.4696	11.1578	NA	NA	11.7705	NA	NA	NA	NA	NA	NA	NA	NA	11.4344	11.8555	NA	NA
AHDEKNECGIGDTVK	Clostridiales	Order	Bacteria		Firmicutes	Clostridia	Clostridiales				NA	NA	NA	NA	NA	NA	NA	NA	NA	NA	NA	11.7715	NA	NA	NA	NA	NA	NA	NA	NA	NA	NA	NA	NA
AHDEKNECNIGDTVK	Clostridiales	Order	Bacteria		Firmicutes	Clostridia	Clostridiales				NA	NA	NA	NA	NA	NA	NA	NA	11.5693	NA	NA	NA	11.8193	NA	NA	NA	NA	NA	NA	NA	NA	NA	12.3624	NA
AHDEKNECSIGDTVK	Lachnospiraceae bacterium MD335	Species	Bacteria		Firmicutes	Clostridia	Clostridiales	Lachnospiraceae		Lachnospiraceae bacterium MD335	NA	NA	NA	NA	NA	NA	NA	NA	NA	NA	NA	NA	11.7863	NA	NA	NA	NA	NA	10.5284	NA	NA	NA	11.9511	NA
AHDENNECGIGDTVK	Firmicutes	Phylum	Bacteria		Firmicutes						NA	NA	NA	NA	NA	NA	13.7393	12.168	10.6973	NA	NA	NA	13.5737	NA	NA	NA	NA	NA	12.4109	12.3635	11.3021	NA	NA	11.6817
AHDENNECNIGDTVK	Clostridiales	Order	Bacteria		Firmicutes	Clostridia	Clostridiales				16.0936	NA	NA	NA	14.6299	14.3179	16.0794	14.4014	14.2083	13.6051	14.6875	15.438	14.7288	14.5819	12.8148	14.4595	NA	13.3271	15.2308	16.1685	14.0398	NA	15.4777	13.4826
AHDENNECSIGDTVK	Ruminococcus	Genus	Bacteria		Firmicutes	Clostridia	Clostridiales	Ruminococcaceae	Ruminococcus		13.3663	11.944	11.8666	12.4636	13.7038	14.109	13.7079	NA	14.1911	13.6279	13.6137	NA	13.2506	13.6279	10.6979	13.6088	14.0755	13.0939	14.0421	14.0808	10.5248	NA	13.3032	13.3649
AHFSEEPNADGQGK	Lachnospiraceae bacterium MD335	Species	Bacteria		Firmicutes	Clostridia	Clostridiales	Lachnospiraceae		Lachnospiraceae bacterium MD335	NA	NA	NA	NA	11.92	10.6447	NA	NA	NA	NA	NA	10.0257	11.856	10.9952	11.543	11.1283	NA	NA	11.6856	10.0459	10.6061	NA	11.9031	11.5149
AHFSQEGNTR	Clostridiales	Order	Bacteria		Firmicutes	Clostridia	Clostridiales				NA	10.5865	11.8178	NA	14.3906	NA	13.537	NA	NA	11.7472	NA	NA	NA	14.1462	NA	13.4563	13.7592	NA	NA	NA	NA	13.587	NA	NA
AHGLDKDFK	Bacteria	Superkingdom	Bacteria								NA	NA	NA	NA	NA	NA	NA	13.2189	NA	NA	NA	NA	NA	NA	NA	NA	NA	NA	NA	NA	NA	NA	NA	NA
AHGLENDFK	Pseudobacteroides cellulosolvens	Species	Bacteria		Firmicutes	Clostridia	Clostridiales	Hungateiclostridiaceae	Pseudobacteroides	Pseudobacteroides cellulosolvens	NA	NA	NA	NA	NA	NA	NA	15.049	NA	NA	NA	NA	NA	NA	NA	NA	NA	NA	NA	NA	NA	NA	NA	NA
AHIAQLCEK	Eukaryota	Superkingdom	Eukaryota								13.1933	NA	NA	13.2982	NA	13.035	NA	NA	NA	11.9617	NA	NA	NA	NA	NA	NA	NA	NA	NA	NA	NA	NA	NA	NA
AHILSDAEEK	Lachnospiraceae	Family	Bacteria		Firmicutes	Clostridia	Clostridiales	Lachnospiraceae			NA	NA	NA	NA	13.9332	13.2309	13.992	NA	13.2215	NA	NA	NA	NA	14.2575	NA	NA	12.8766	13.6825	NA	NA	13.0961	12.5806	13.444	NA
AHIMPAEFSSCPLNSDEAVNK	Rodentia	Order	Eukaryota	Metazoa	Chordata	Mammalia	Rodentia				NA	NA	NA	NA	NA	NA	NA	11.0386	NA	NA	NA	NA	10.4919	NA	NA	NA	NA	NA	NA	NA	NA	NA	NA	NA
AHLGAMQNR	Desulfovibrionaceae	Family	Bacteria		Proteobacteria	Deltaproteobacteria	Desulfovibrionales	Desulfovibrionaceae			NA	NA	NA	NA	NA	NA	NA	NA	12.9853	NA	NA	NA	NA	NA	NA	NA	NA	NA	NA	NA	NA	NA	NA	NA
AHLLFTDLDR	Bacteria	Superkingdom	Bacteria								NA	NA	NA	NA	NA	NA	NA	12.6621	NA	NA	NA	NA	NA	NA	NA	NA	NA	NA	NA	NA	NA	NA	NA	NA
AHPADGAGQGLIK	Bacteroidales	Order	Bacteria		Bacteroidetes	Bacteroidia	Bacteroidales				NA	NA	NA	NA	NA	NA	NA	NA	NA	NA	NA	13.0242	14.2872	NA	NA	NA	NA	NA	NA	NA	NA	NA	13.6467	NA
AHSSISTATAADFDFDK	Lachnospiraceae bacterium MD335	Species	Bacteria		Firmicutes	Clostridia	Clostridiales	Lachnospiraceae		Lachnospiraceae bacterium MD335	NA	NA	NA	NA	NA	NA	NA	NA	NA	NA	NA	NA	NA	NA	NA	NA	10.9967	NA	NA	NA	NA	NA	NA	NA
AHTLELMK	Oscillibacter sp. KLE 1745	Species	Bacteria		Firmicutes	Clostridia	Clostridiales	Oscillospiraceae	Oscillibacter	Oscillibacter sp. KLE 1745	NA	NA	NA	NA	NA	NA	NA	NA	11.4356	NA	NA	12.1552	14.2118	NA	NA	NA	NA	NA	NA	NA	NA	NA	12.9636	NA
AIAAEWR	Bacteria	Superkingdom	Bacteria								13.0185	NA	NA	NA	NA	NA	NA	NA	15.1605	NA	14.8381	15.6149	NA	NA	NA	NA	NA	NA	14.9919	NA	NA	NA	NA	NA
AIAAGEAPVNACPVGGAAVAGK	Roseburia	Genus	Bacteria		Firmicutes	Clostridia	Clostridiales	Lachnospiraceae	Roseburia		NA	NA	NA	NA	NA	NA	8.4167	NA	NA	NA	NA	NA	NA	NA	NA	NA	NA	NA	NA	NA	NA	10.0911	NA	NA
AIAAGITEVVFDR	Bacteroidetes	Phylum	Bacteria		Bacteroidetes						13.5984	NA	15.2607	15.1494	13.9253	14.4058	11.6286	12.5952	13.3855	NA	14.3775	NA	15.4291	14.3372	15.2222	NA	14.2542	12.0181	14.5489	11.904	13.8455	NA	15.3158	14.7219
AIAALEGR	Bacteria	Superkingdom	Bacteria								14.2437	12.2805	18.4661	NA	NA	NA	NA	NA	NA	NA	10.4739	NA	NA	NA	14.275	NA	13.9288	NA	NA	NA	NA	NA	NA	NA
AIAAMPIAGSYR	Bacteria	Superkingdom	Bacteria								NA	NA	12.3647	NA	13.5612	NA	15.2668	13.2629	NA	NA	14.2474	13.0972	15.4049	13.2877	13.6935	13.0912	NA	13.3688	15.3561	14.1015	11.9745	NA	13.8262	NA
AIAAMPVAGSYR	Clostridiales	Order	Bacteria		Firmicutes	Clostridia	Clostridiales				12.636	13.691	13.1547	13.9378	14.501	14.665	14.6234	14.7625	13.594	NA	13.4951	13.5561	14.5371	14.1407	14.2363	14.1508	12.9591	13.7332	14.7173	13.6461	NA	12.8628	15.1567	13.948
AIADAIVEATEK	Prevotella	Genus	Bacteria		Bacteroidetes	Bacteroidia	Bacteroidales	Prevotellaceae	Prevotella		12.7224	13.9012	14.179	13.7892	11.3413	11.1909	9.49408	11.7368	NA	NA	13.6996	NA	12.9569	11.8789	13.9578	NA	12.0273	10.3286	14.4906	11.7394	12.0159	NA	12.8109	13.3834
AIADDDNEIKER	Clostridiales	Order	Bacteria		Firmicutes	Clostridia	Clostridiales				NA	NA	NA	NA	NA	NA	12.6644	NA	NA	NA	NA	NA	11.6552	11.352	11.555	NA	NA	NA	NA	NA	NA	NA	NA	NA
AIADDENEIK	Clostridiales bacterium CHKCI001	Species	Bacteria		Firmicutes	Clostridia	Clostridiales			Clostridiales bacterium CHKCI001	NA	NA	NA	NA	NA	NA	NA	NA	11.7563	NA	NA	NA	NA	NA	NA	NA	NA	NA	NA	NA	NA	NA	NA	NA
AIADDENEIKER	Clostridiales bacterium CHKCI001	Species	Bacteria		Firmicutes	Clostridia	Clostridiales			Clostridiales bacterium CHKCI001	NA	NA	NA	NA	12.1737	NA	12.2129	NA	12.134	NA	10.5377	10.6197	12.0205	11.8774	12.2523	10.4629	12.2234	11.0395	10.5114	10.5797	11.5221	10.9151	11.1721	NA
AIADKEDEAA	Lactobacillus	Genus	Bacteria		Firmicutes	Bacilli	Lactobacillales	Lactobacillaceae	Lactobacillus		14.0144	14.3493	12.941	12.6081	NA	NA	11.7954	NA	NA	NA	13.6426	NA	NA	NA	NA	12.2353	NA	11.967	12.645	11.9102	NA	12.6665	NA	NA
AIADKELSDK	Bacteroidales	Order	Bacteria		Bacteroidetes	Bacteroidia	Bacteroidales				NA	NA	NA	NA	15.6132	15.2489	13.5757	15.1947	14.7595	NA	NA	NA	15.489	15.7006	16.3048	15.2917	NA	NA	15.9493	NA	15.9874	NA	14.6928	15.5075
AIADLGIDFLAAGIGNIHGK	Clostridiales	Order	Bacteria		Firmicutes	Clostridia	Clostridiales				NA	NA	NA	NA	NA	NA	NA	11.6078	NA	NA	NA	NA	NA	NA	NA	NA	NA	NA	NA	NA	NA	NA	NA	NA
AIADLGVDMLAAGIGNIHGK	Clostridiales	Order	Bacteria		Firmicutes	Clostridia	Clostridiales				11.1588	NA	12.0819	10.8891	14.2439	15.1243	12.9722	15.3634	NA	12.3309	NA	NA	13.6001	14.5322	13.8553	11.8652	14.359	13.2297	15.041	NA	13.0651	11.8884	13.7221	15.6396
AIAEAEAYPGPSLILAYAPCINHGIK	Hungatella hathewayi	Species	Bacteria		Firmicutes	Clostridia	Clostridiales	Clostridiaceae	Hungatella	Hungatella hathewayi	NA	NA	NA	NA	NA	NA	NA	12.0485	NA	NA	NA	NA	12.5944	11.617	11.2784	NA	11.8271	NA	11.0567	NA	NA	NA	10.844	NA
AIAEIGIYPAVDPLDSTSR	Bacteria	Superkingdom	Bacteria								NA	NA	14.75	15.1021	12.6899	15.5053	12.7246	12.3576	13.3716	NA	NA	14.187	NA	12.1818	NA	NA	NA	13.9416	15.0137	NA	NA	10.5069	NA	15.4832
AIAEIQALR	Alistipes indistinctus	Species	Bacteria		Bacteroidetes	Bacteroidia	Bacteroidales	Rikenellaceae	Alistipes	Alistipes indistinctus	12.945	NA	13.755	14.6691	13.6189	14.4116	NA	13.9064	13.3324	13.3173	13.5111	12.216	13.3621	14.015	13.2724	13.2145	14.0477	13.0429	13.5999	NA	12.9643	NA	13.5542	12.9533
AIAEIQALRK	Alistipes indistinctus	Species	Bacteria		Bacteroidetes	Bacteroidia	Bacteroidales	Rikenellaceae	Alistipes	Alistipes indistinctus	11.3602	NA	NA	NA	12.2799	12.8534	NA	NA	11.7386	NA	12.075	NA	12.9314	12.612	12.4471	11.8374	NA	11.1059	12.5781	10.4837	11.9298	NA	13.5281	12.2637
AIAELHGK	Paenibacillus naphthalenovorans	Species	Bacteria		Firmicutes	Bacilli	Bacillales	Paenibacillaceae	Paenibacillus	Paenibacillus naphthalenovorans	13.8563	NA	NA	NA	NA	NA	NA	NA	NA	NA	NA	NA	NA	NA	14.8682	16.0058	13.1091	14.7189	NA	NA	NA	13.5382	NA	NA
AIAEMEDGDVLVVENTR	Lactobacillus	Genus	Bacteria		Firmicutes	Bacilli	Lactobacillales	Lactobacillaceae	Lactobacillus		NA	11.5325	11.5459	NA	NA	NA	NA	12.2313	10.58	NA	10.3384	11.8666	10.1962	NA	NA	NA	NA	NA	NA	NA	NA	NA	NA	NA
AIAEVTLGNLK	Clostridium sp. MD294	Species	Bacteria		Firmicutes	Clostridia	Clostridiales	Clostridiaceae	Clostridium	Clostridium sp. MD294	11.727	11.797	NA	11.3847	12.9665	14.9139	13.8696	13.0998	12.564	12.8476	12.3779	12.4114	11.7579	13.0606	12.9436	13.5128	12.688	12.6313	13.407	13.9066	11.5779	11.8958	11.7473	13.709
AIAGDENEIKER	Enterocloster asparagiformis	Species	Bacteria		Firmicutes	Clostridia	Clostridiales	Lachnospiraceae	Enterocloster	Enterocloster asparagiformis	10.3455	10.3342	NA	11.449	13.2181	12.5445	14.2092	12.6223	11.8416	NA	12.8229	12.1119	12.8445	13.0553	12.5697	11.7867	11.9301	13.0977	13.6146	12.5346	12.0873	12.9783	12.6663	12.9014
AIAGIINQPYYNYQAGPDAALGR	Mus musculus	Species	Eukaryota	Metazoa	Chordata	Mammalia	Rodentia	Muridae	Mus	Mus musculus	NA	NA	NA	NA	NA	8.37838	NA	NA	NA	NA	NA	NA	8.534	NA	NA	NA	NA	NA	NA	NA	NA	NA	8.95293	8.84008
AIAGSTDANGDINETFDGIVIDGQK	Anaerotruncus sp. G3(2012)	Species	Bacteria		Firmicutes	Clostridia	Clostridiales	Ruminococcaceae	Anaerotruncus	Anaerotruncus sp. G3(2012)	NA	NA	NA	NA	NA	NA	NA	10.953	NA	NA	NA	NA	NA	NA	NA	NA	NA	NA	NA	NA	NA	NA	NA	NA
AIAGTGANVIVTGGK	Metazoa	Kingdom	Eukaryota	Metazoa							NA	11.5022	NA	10.3022	NA	NA	NA	NA	NA	NA	10.5072	NA	NA	NA	NA	NA	NA	NA	10.868	NA	NA	NA	NA	10.2226
AIAISSDLQEEFISPCGACR	Mus musculus	Species	Eukaryota	Metazoa	Chordata	Mammalia	Rodentia	Muridae	Mus	Mus musculus	NA	NA	NA	11.0116	NA	10.9356	NA	11.0995	NA	NA	NA	NA	NA	NA	NA	NA	NA	NA	11.0778	NA	NA	NA	NA	NA
AIANECQANFISIK	Eukaryota	Superkingdom	Eukaryota								10.3207	12.2068	11.3255	11.9997	11.1354	10.5025	NA	11.6052	10.3522	NA	NA	NA	10.429	11.0741	NA	10.059	11.1014	11.4168	11.0285	10.5072	11.072	10.0667	10.1585	12.1658
AIANIPSR	Lachnospiraceae bacterium MD335	Species	Bacteria		Firmicutes	Clostridia	Clostridiales	Lachnospiraceae		Lachnospiraceae bacterium MD335	NA	NA	NA	NA	12.9542	NA	NA	NA	NA	NA	NA	12.3987	13.2169	12.8743	12.5967	13.3219	13.2172	12.1446	NA	13.0846	NA	11.6401	12.9674	13.3189
AIANIPSREELLSK	Lachnospiraceae bacterium MD335	Species	Bacteria		Firmicutes	Clostridia	Clostridiales	Lachnospiraceae		Lachnospiraceae bacterium MD335	NA	NA	NA	NA	NA	12.8801	NA	11.9975	NA	NA	NA	13.4695	14.1094	NA	NA	NA	NA	NA	NA	NA	NA	NA	13.9648	NA
AIAQAQIIMFPGGFSAGDEPDGSAK	Lachnospiraceae bacterium A4	Species	Bacteria		Firmicutes	Clostridia	Clostridiales	Lachnospiraceae		Lachnospiraceae bacterium A4	NA	NA	NA	NA	10.0605	NA	NA	NA	NA	NA	NA	NA	9.76468	10.0619	10.1172	NA	NA	NA	NA	NA	NA	NA	9.12257	NA
AIAQGFSFYAPIR	Clostridium	Genus	Bacteria		Firmicutes	Clostridia	Clostridiales	Clostridiaceae	Clostridium		NA	NA	NA	NA	NA	NA	NA	NA	NA	NA	NA	11.5843	NA	NA	NA	NA	NA	NA	NA	NA	NA	11.5123	NA	NA
AIAQILLDEGYIK	Firmicutes	Phylum	Bacteria		Firmicutes						11.983	NA	NA	NA	13.1662	NA	NA	14.4456	12.0137	NA	NA	NA	15.0321	13.7328	13.8031	NA	12.7367	NA	NA	NA	12.718	NA	13.0049	NA
AIAQSSVIFNPCLFGR	Mus musculus	Species	Eukaryota	Metazoa	Chordata	Mammalia	Rodentia	Muridae	Mus	Mus musculus	NA	NA	NA	NA	NA	NA	NA	NA	NA	NA	NA	NA	10.6474	NA	NA	NA	NA	NA	NA	NA	NA	NA	NA	NA
AIASATEGGSVPQIR	Mus musculus	Species	Eukaryota	Metazoa	Chordata	Mammalia	Rodentia	Muridae	Mus	Mus musculus	11.7764	13.1169	13.15	12.6007	NA	13.7856	NA	NA	NA	NA	NA	NA	NA	NA	9.8365	NA	NA	NA	12.788	NA	NA	NA	NA	12.425
AIASDISSGR	Lachnospiraceae bacterium A4	Species	Bacteria		Firmicutes	Clostridia	Clostridiales	Lachnospiraceae		Lachnospiraceae bacterium A4	NA	NA	NA	NA	NA	NA	NA	NA	15.3441	15.4176	NA	NA	NA	NA	NA	NA	NA	NA	NA	NA	NA	NA	NA	NA
AIATDTVANMSSGPEPPFFK	Rodentia	Order	Eukaryota	Metazoa	Chordata	Mammalia	Rodentia				NA	NA	NA	NA	9.98143	NA	NA	10.157	8.89795	NA	8.58503	9.24045	10.2328	NA	9.78252	NA	NA	NA	NA	NA	10.4942	NA	10.5052	9.85579
AIATETAADYAYLFDIIAK	Lachnospiraceae bacterium A2	Species	Bacteria		Firmicutes	Clostridia	Clostridiales	Lachnospiraceae		Lachnospiraceae bacterium A2	NA	NA	10.9198	8.96263	9.87144	10.7341	NA	10.3548	NA	NA	NA	NA	NA	9.79596	NA	11.4189	NA	9.96508	NA	NA	10.6394	NA	NA	NA
AIATLIAAYR	Eubacterium sp. 14-2	Species	Bacteria		Firmicutes	Clostridia	Clostridiales	Eubacteriaceae	Eubacterium	Eubacterium sp. 14-2	NA	NA	NA	NA	10.1919	NA	NA	NA	NA	NA	NA	NA	10.0406	9.85779	10.0117	NA	11.7116	NA	NA	NA	NA	NA	10.8629	NA
AIATVISVYR	Roseburia	Genus	Bacteria		Firmicutes	Clostridia	Clostridiales	Lachnospiraceae	Roseburia		NA	NA	NA	NA	11.1596	NA	NA	NA	NA	NA	NA	NA	14.2069	11.5128	12.7758	NA	14.0998	11.1206	11.1902	NA	11.3955	NA	12.1005	NA
AIAVFPDGK	Eubacterium plexicaudatum	Species	Bacteria		Firmicutes	Clostridia	Clostridiales	Eubacteriaceae	Eubacterium	Eubacterium plexicaudatum	11.2179	NA	10.4294	NA	11.6667	12.6313	NA	NA	NA	NA	NA	NA	NA	11.4957	NA	12.4322	11.041	NA	NA	NA	NA	12.4975	12.3954	NA
AIAYATHR	Metazoa	Kingdom	Eukaryota	Metazoa							12.5439	NA	NA	NA	NA	NA	NA	NA	NA	NA	12.3852	NA	NA	NA	NA	NA	NA	NA	11.8922	12.2365	NA	NA	NA	NA
AIAYLFPSGLFEK	Chordata	Phylum	Eukaryota	Metazoa	Chordata						NA	NA	NA	NA	NA	NA	NA	NA	NA	NA	NA	NA	NA	NA	NA	NA	NA	NA	NA	NA	NA	NA	NA	10.6813
AIDAGATAFK	Bacteria	Superkingdom	Bacteria								15.4263	14.5172	14.19	15.2167	15.9419	16.193	16.1708	15.1275	15.7527	13.405	14.8135	14.6666	16.1573	16.0635	16.3911	14.3917	14.4915	13.4332	16.4032	15.2738	13.4348	13.9975	16.4369	16.9377
AIDAGATAFKK	Bacteria	Superkingdom	Bacteria								NA	NA	NA	NA	NA	12.1247	13.7035	11.2078	12.1481	NA	NA	NA	13.8311	12.3689	12.5191	10.4797	NA	NA	12.6392	11.0836	NA	10.2181	13.5059	13.2699
AIDAGATAFVK	Bacteria	Superkingdom	Bacteria								13.2866	11.322	11.461	NA	13.2916	12.3468	14.0416	NA	NA	NA	13.0502	NA	13.8369	12.9484	13.5958	11.6652	11.7462	11.9962	13.5015	12.1708	NA	NA	12.5069	NA
AIDAGATAYR	Slackia	Genus	Bacteria		Actinobacteria	Coriobacteriia	Eggerthellales	Eggerthellaceae	Slackia		13.8685	NA	NA	NA	13.8458	NA	13.9011	NA	14.537	NA	13.8768	12.9358	15.6733	13.7043	15.5788	12.4066	13.8139	14.269	15.2614	13.2948	NA	NA	15.3993	NA
AIDAGATAYVK	Bacteria	Superkingdom	Bacteria								NA	NA	NA	NA	12.9818	12.5975	NA	NA	NA	NA	13.0958	NA	NA	12.98	13.6163	NA	NA	NA	NA	NA	NA	NA	NA	13.5148
AIDAGVDAVHK	Clostridiales	Order	Bacteria		Firmicutes	Clostridia	Clostridiales				13.6574	11.8646	12.0502	11.7934	14.1213	14.2384	14.0343	11.4383	13.4297	NA	13.4767	12.4423	15.072	14.0718	14.4381	11.8743	12.4417	12.7636	15.7506	13.5021	12.0448	12.4161	15.4565	16.3999
AIDASANDAGR	Blautia	Genus	Bacteria		Firmicutes	Clostridia	Clostridiales	Lachnospiraceae	Blautia		NA	NA	NA	NA	NA	NA	NA	13.749	14.0177	NA	NA	13.6032	NA	NA	NA	NA	NA	NA	NA	NA	NA	NA	NA	NA
AIDASVAGVVDK	Clostridium sp. MD294	Species	Bacteria		Firmicutes	Clostridia	Clostridiales	Clostridiaceae	Clostridium	Clostridium sp. MD294	NA	NA	NA	NA	NA	NA	NA	NA	NA	NA	11.8498	12.3896	NA	11.5511	NA	NA	NA	NA	NA	NA	NA	NA	NA	NA
AIDGTLSVMVGGK	Bacteria	Superkingdom	Bacteria								NA	NA	NA	NA	NA	NA	NA	NA	NA	NA	NA	NA	NA	NA	11.6039	NA	NA	NA	NA	NA	NA	NA	NA	NA
AIDIINASIR	Lachnospiraceae bacterium MD335	Species	Bacteria		Firmicutes	Clostridia	Clostridiales	Lachnospiraceae		Lachnospiraceae bacterium MD335	11.5318	NA	11.2448	NA	11.9649	NA	NA	11.338	NA	11.326	11.6625	12.0954	12.4937	12.1998	NA	11.6993	12.3613	NA	12.5677	11.6409	NA	NA	12.1082	11.3575
AIDIITDAIAR	Lactobacillus	Genus	Bacteria		Firmicutes	Bacilli	Lactobacillales	Lactobacillaceae	Lactobacillus		14.0226	15.052	12.6642	14.1921	NA	NA	NA	13.8416	NA	NA	14.361	13.483	13.0131	NA	13.2817	12.899	13.343	12.0626	13.059	13.8042	14.5557	12.7549	12.7398	NA
AIDKLEPFQR	Bacteria	Superkingdom	Bacteria								NA	NA	NA	NA	12.3374	12.4172	12.6923	NA	11.3698	NA	13.0425	12.6988	11.7698	11.9829	12.693	11.3373	12.6268	12.3701	13.5819	NA	10.3819	NA	12.3893	11.7396
AIDLDNDR	Lachnospiraceae bacterium 10-1	Species	Bacteria		Firmicutes	Clostridia	Clostridiales	Lachnospiraceae		Lachnospiraceae bacterium 10-1	NA	15.6985	14.1214	13.1882	15.4229	15.5694	15.0159	14.9808	14.7808	14.0516	16.2379	14.5113	12.5103	15.4864	15.3249	14.6726	16.8088	16.9422	15.5803	14.8175	16.0216	15.7991	16.5056	14.7269
AIDLFTDAIK	Mammalia	Class	Eukaryota	Metazoa	Chordata	Mammalia					NA	11.0382	NA	11.4904	NA	11.4904	NA	NA	NA	NA	NA	NA	NA	NA	NA	NA	NA	NA	NA	NA	NA	NA	NA	NA
AIDLGATAFK	Clostridiales	Order	Bacteria		Firmicutes	Clostridia	Clostridiales				NA	NA	11.7605	NA	12.8342	13.4778	13.8118	14.0692	12.0697	NA	NA	NA	13.8381	NA	NA	NA	NA	NA	13.0481	NA	NA	NA	12.5346	15.9942
AIDLGATAFKK	Clostridiales	Order	Bacteria		Firmicutes	Clostridia	Clostridiales				NA	NA	NA	NA	NA	NA	NA	NA	NA	NA	NA	NA	NA	NA	NA	NA	NA	NA	NA	NA	NA	NA	NA	10.8258
AIDLLQSCLSPPEDTLWK	Mus musculus	Species	Eukaryota	Metazoa	Chordata	Mammalia	Rodentia	Muridae	Mus	Mus musculus	10.482	NA	NA	13.0036	11.6333	11.4296	9.36644	NA	10.1677	NA	NA	NA	11.4782	11.4746	10.1343	NA	11.0504	8.74898	11.5756	9.89103	NA	9.65775	12.7822	11.427
AIDLMDEAGAK	Bacteria	Superkingdom	Bacteria								NA	NA	NA	NA	NA	NA	NA	13.0416	NA	NA	13.2913	13.2215	12.6097	NA	NA	NA	NA	11.7723	12.5415	12.9207	14.0883	NA	11.9734	NA
AIDLMDEAGAKK	Bacteria	Superkingdom	Bacteria								11.24	NA	NA	NA	NA	NA	NA	12.869	NA	NA	11.5642	11.2109	NA	NA	NA	NA	NA	10.6832	11.7693	12.0643	12.3637	NA	NA	NA
AIDLVADK	Lactobacillus	Genus	Bacteria		Firmicutes	Bacilli	Lactobacillales	Lactobacillaceae	Lactobacillus		NA	NA	NA	NA	NA	NA	NA	14.7146	NA	NA	NA	14.3273	NA	NA	NA	NA	NA	NA	NA	14.6593	14.7334	NA	NA	NA
AIDLVADKAK	Lactobacillus	Genus	Bacteria		Firmicutes	Bacilli	Lactobacillales	Lactobacillaceae	Lactobacillus		11.7681	NA	NA	NA	NA	NA	9.4637	NA	NA	NA	11.9157	NA	NA	NA	NA	NA	NA	NA	11.098	11.2354	NA	NA	NA	NA
AIDMIGMPGMK	Clostridiales	Order	Bacteria		Firmicutes	Clostridia	Clostridiales				12.9733	12.0149	11.494	13.2429	13.2963	13.8888	14.9756	14.8064	14.0045	12.3094	14.1934	13.0755	13.5925	13.6694	14.6835	13.2274	14.4042	13.5432	14.2854	13.2108	12.6148	12.2363	13.1895	13.7156
AIDTIYQTTDFSGIR	Mammalia	Class	Eukaryota	Metazoa	Chordata	Mammalia					NA	11.3593	11.2093	11.847	10.7661	11.9827	NA	NA	11.1021	11.1091	11.2582	11.0825	11.3464	NA	NA	10.5921	NA	12.1563	NA	11.2683	NA	10.6973	11.9085	11.467
AIDYLASDYATIR	Lachnospiraceae bacterium 28-4	Species	Bacteria		Firmicutes	Clostridia	Clostridiales	Lachnospiraceae		Lachnospiraceae bacterium 28-4	NA	NA	NA	NA	NA	11.6783	NA	NA	NA	NA	NA	NA	NA	NA	NA	NA	NA	NA	12.2909	NA	NA	NA	NA	NA
AIDYVQR	Eukaryota	Superkingdom	Eukaryota								NA	14.7165	NA	14.5165	NA	NA	NA	NA	NA	14.8218	NA	NA	NA	NA	NA	NA	12.7182	NA	NA	NA	NA	NA	NA	NA
AIEAAGYKPGK	Firmicutes	Phylum	Bacteria		Firmicutes						NA	NA	NA	NA	NA	13.4258	NA	13.55	NA	NA	NA	14.2347	12.7532	13.4098	NA	NA	NA	NA	NA	NA	NA	NA	11.3627	13.3717
AIEAGLTPILCCGETLEQR	Clostridiales	Order	Bacteria		Firmicutes	Clostridia	Clostridiales				NA	NA	NA	NA	11.6285	NA	NA	NA	NA	NA	10.7791	NA	11.1747	11.2454	NA	NA	10.1414	NA	12.586	NA	11.0834	10.1019	10.8115	NA
AIECSYTSADGLK	Muridae	Family	Eukaryota	Metazoa	Chordata	Mammalia	Rodentia	Muridae			11.1301	13.0944	11.2625	12.5798	10.586	12.3028	NA	10.7076	11.506	10.9935	10.9572	11.1485	11.592	10.2711	NA	10.5815	NA	11.0533	11.6334	10.8533	9.24737	NA	12.4595	11.3424
AIEDAGYKPGK	Lactobacillus	Genus	Bacteria		Firmicutes	Bacilli	Lactobacillales	Lactobacillaceae	Lactobacillus		13.7146	14.3387	NA	12.8592	NA	NA	NA	13.8865	NA	NA	13.1171	13.2275	12.456	NA	NA	NA	12.7194	NA	12.6672	12.9517	13.6697	NA	12.3602	12.3102
AIEDEDLIIVGVNK	Mucispirillum schaedleri	Species	Bacteria		Deferribacteres	Deferribacteres	Deferribacterales	Deferribacteraceae	Mucispirillum	Mucispirillum schaedleri	NA	NA	NA	NA	NA	NA	NA	NA	NA	NA	NA	NA	NA	NA	NA	NA	NA	10.3281	NA	NA	NA	NA	NA	10.3947
AIEDMMAR	Clostridiales	Order	Bacteria		Firmicutes	Clostridia	Clostridiales				13.8761	14.361	13.6443	14.4297	15.499	15.5016	15.6045	NA	15.7551	NA	15.4916	15.0608	16.0958	15.618	15.4348	15.9171	14.6957	15.3016	15.2852	15.2377	14.819	14.3555	16.6411	15.6739
AIEDMTEEAFQK	Rodentia	Order	Eukaryota	Metazoa	Chordata	Mammalia	Rodentia				NA	NA	NA	NA	NA	12.1529	NA	NA	NA	NA	10.2581	10.7787	NA	NA	NA	NA	NA	11.0877	10.4819	NA	NA	NA	NA	11.2981
AIEDYIPFANLR	Lactobacillaceae	Family	Bacteria		Firmicutes	Bacilli	Lactobacillales	Lactobacillaceae			NA	15.4048	13.255	13.4388	11.6934	NA	12.1396	14.2324	NA	NA	13.5824	14.6785	13.2349	NA	NA	NA	12.3407	NA	13.3469	12.8338	13.8558	NA	12.8498	12.311
AIEEPMR	Bacteria	Superkingdom	Bacteria								13.5813	13.542	14.3186	13.3496	NA	NA	NA	NA	12.5641	NA	15.0229	NA	12.8328	NA	13.019	NA	NA	NA	13.1483	11.5709	NA	NA	13.0005	13.4848
AIEFSTLQR	Clostridiales	Order	Bacteria		Firmicutes	Clostridia	Clostridiales				16.696	15.6313	15.3261	15.8825	18.0265	17.3922	17.9831	17.4849	17.4752	17.0373	16.8675	17.7565	17.8802	18.1454	17.9065	17.1649	17.6898	18.3938	18.1927	18.4656	16.9938	17.3808	17.5331	17.0896
AIEGGMDIK	Lactobacillus	Genus	Bacteria		Firmicutes	Bacilli	Lactobacillales	Lactobacillaceae	Lactobacillus		14.1013	14.1443	NA	13.0425	NA	NA	12.4786	14.91	NA	NA	14.4984	14.2737	NA	NA	NA	NA	NA	12.5852	14.2434	14.2567	14.7306	NA	13.1387	NA
AIEIEQAALDR	Mahella australiensis	Species	Bacteria		Firmicutes	Clostridia	Thermoanaerobacterales	Thermoanaerobacterales Family IV. Incertae Sedis	Mahella	Mahella australiensis	12.1309	NA	NA	NA	16.3548	11.9065	13.1428	NA	14.9459	14.322	13.2973	15.2484	12.9706	16.5104	12.1702	16.0765	13.8875	11.9282	14.8649	14.7409	14.8016	15.6507	15.552	11.9029
AIEIGMGK	Firmicutes	Phylum	Bacteria		Firmicutes						15.0932	13.9945	13.9715	13.6183	15.9039	15.9048	14.8997	14.7917	15.9354	14.0281	15.01	14.3203	15.9327	15.6744	15.9985	15.5586	15.4055	15.2947	15.9664	15.3597	14.891	15.8535	15.7553	16.886
AIEIGMGKR	Firmicutes	Phylum	Bacteria		Firmicutes						14.3232	NA	NA	NA	NA	14.3524	13.9305	NA	13.173	NA	13.2418	NA	13.7994	NA	14.297	12.9188	NA	13.1394	14.2417	13.6502	NA	NA	14.1488	15.9114
AIEINPDSAQPYK	Mammalia	Class	Eukaryota	Metazoa	Chordata	Mammalia					NA	NA	NA	11.769	NA	12.177	NA	NA	NA	NA	NA	NA	NA	NA	NA	NA	NA	NA	NA	NA	NA	NA	NA	NA
AIEIYTDMGR	Metazoa	Kingdom	Eukaryota	Metazoa							NA	11.4901	NA	11.5699	NA	11.2848	NA	NA	NA	NA	NA	NA	NA	NA	NA	NA	NA	NA	NA	NA	NA	NA	NA	NA
AIELEDHFENMGAK	Lactobacillales	Order	Bacteria		Firmicutes	Bacilli	Lactobacillales				NA	NA	NA	NA	NA	NA	NA	11.6342	NA	NA	NA	12.2932	10.6434	NA	NA	NA	NA	NA	NA	11.9454	10.8602	NA	NA	NA
AIELSSLQR	Clostridiales	Order	Bacteria		Firmicutes	Clostridia	Clostridiales				13.9733	NA	12.6876	NA	14.8545	NA	14.2435	14.1967	15.0643	13.6872	14.4812	14.7529	14.7488	14.7642	14.051	14.7765	15.3821	14.1204	15.4037	15.1002	14.7756	13.899	14.7912	14.0301
AIELSTLQR	Bacteria	Superkingdom	Bacteria								15.7215	15.2347	16.0573	15.8456	17.4221	17.4716	18.0529	18.1319	16.4661	15.809	16.2903	15.9289	17.1081	17.6721	17.5023	17.8854	17.3179	17.0763	16.8913	16.6889	17.0398	16.1962	16.9334	17.0926
AIEPITSTASSTVVK	Lachnospiraceae bacterium MD335	Species	Bacteria		Firmicutes	Clostridia	Clostridiales	Lachnospiraceae		Lachnospiraceae bacterium MD335	13.1383	NA	14.817	10.2299	14.261	12.7383	12.3487	13.7965	NA	14.4913	13.9824	12.5189	14.3065	14.2406	13.0568	14.5498	14.8615	12.4862	14.0804	13.6672	13.5089	14.2237	NA	12.2154
AIEQADLLQEEDESPR	Chordata	Phylum	Eukaryota	Metazoa	Chordata						NA	10.0153	9.87738	10.4405	NA	NA	NA	NA	NA	NA	NA	NA	NA	NA	NA	NA	NA	NA	NA	NA	NA	NA	NA	NA
AIESQCYVIAAAQCGR	Rodentia	Order	Eukaryota	Metazoa	Chordata	Mammalia	Rodentia				NA	10.763	NA	10.2848	NA	NA	NA	NA	NA	NA	NA	NA	NA	NA	NA	NA	NA	NA	NA	NA	NA	NA	NA	NA
AIETGLPK	Bacteria	Superkingdom	Bacteria								14.2865	14.5731	14.2196	14.2303	14.0258	13.9291	13.7636	14.2211	14.321	12.3406	15.4547	13.8467	13.5748	14.0815	14.8759	13.6503	13.7254	13.3164	15.3082	14.0079	13.2788	11.7435	13.2771	14.2093
AIEVTWIK	Lachnospiraceae bacterium MD335	Species	Bacteria		Firmicutes	Clostridia	Clostridiales	Lachnospiraceae		Lachnospiraceae bacterium MD335	NA	NA	NA	NA	11.3558	NA	NA	NA	NA	NA	11.4007	NA	12.3215	10.7709	11.6913	NA	11.7991	NA	11.5756	NA	10.3948	NA	11.5058	NA
AIFCPNGTWLPGEMADAPR	Lachnospiraceae	Family	Bacteria		Firmicutes	Clostridia	Clostridiales	Lachnospiraceae			13.3635	12.6552	11.8902	12.3993	NA	13.4279	13.3515	11.8335	13.3515	11.8975	NA	12.8659	13.2041	13.7649	12.6724	12.6034	14.3839	13.3219	13.7275	NA	13.2857	13.3515	13.7915	10.9942
AIFCPNGTWLPGEMAEAPR	Lachnospiraceae	Family	Bacteria		Firmicutes	Clostridia	Clostridiales	Lachnospiraceae			NA	NA	NA	NA	12.7141	11.7584	12.6108	NA	NA	NA	NA	NA	NA	12.5568	NA	NA	12.2619	NA	11.8938	NA	NA	10.9764	12.0603	NA
AIFCPNGTWLVGEMAEAPR	Lachnospiraceae bacterium A2	Species	Bacteria		Firmicutes	Clostridia	Clostridiales	Lachnospiraceae		Lachnospiraceae bacterium A2	NA	NA	NA	NA	NA	10.9925	10.3848	11.2463	NA	NA	NA	NA	11.19	10.7023	NA	NA	NA	NA	NA	NA	NA	NA	NA	NA
AIFDDIATYGVIENR	Lachnospiraceae bacterium A4	Species	Bacteria		Firmicutes	Clostridia	Clostridiales	Lachnospiraceae		Lachnospiraceae bacterium A4	NA	NA	NA	NA	12.9711	13.5399	13.3122	NA	NA	NA	NA	NA	NA	12.9769	NA	11.6056	13.9975	12.6331	NA	NA	NA	12.8181	13.29	NA
AIFDKYPEYR	Lachnospiraceae	Family	Bacteria		Firmicutes	Clostridia	Clostridiales	Lachnospiraceae			NA	NA	NA	NA	NA	NA	NA	12.2548	NA	NA	NA	NA	NA	NA	11.9539	NA	12.9806	12.5947	NA	NA	NA	NA	10.7259	NA
AIFDNADR	Bacteria	Superkingdom	Bacteria								16.2192	NA	NA	NA	15.5604	NA	13.4834	NA	13.8174	15.3257	12.2741	17.7447	NA	15.6491	14.4868	NA	13.4278	17.0998	16.889	15.0861	15.2059	16.7365	17.073	NA
AIFDPIIR	Lachnospiraceae bacterium MD335	Species	Bacteria		Firmicutes	Clostridia	Clostridiales	Lachnospiraceae		Lachnospiraceae bacterium MD335	11.5827	NA	13.809	NA	11.1965	11.0178	11.1824	11.9089	12.8805	13.1627	13.2986	14.0804	NA	11.2366	NA	NA	14.1475	12.8241	13.4168	13.5946	13.0243	12.7748	NA	NA
AIFLADGK	Chordata	Phylum	Eukaryota	Metazoa	Chordata						12.4503	NA	NA	12.5545	NA	NA	NA	NA	NA	NA	NA	NA	NA	NA	NA	NA	NA	12.5625	12.3057	12.1597	NA	NA	NA	11.6882
AIFLADGNVFTTGFSR	Chordata	Phylum	Eukaryota	Metazoa	Chordata						NA	10.9901	10.7441	10.3076	NA	10.847	NA	NA	NA	NA	NA	NA	NA	NA	NA	NA	NA	NA	10.1028	NA	NA	NA	NA	10.2312
AIFMPNGTWIVGEMADAPR	Roseburia	Genus	Bacteria		Firmicutes	Clostridia	Clostridiales	Lachnospiraceae	Roseburia		NA	NA	NA	NA	NA	NA	NA	NA	NA	NA	NA	NA	NA	NA	9.71712	NA	NA	NA	NA	NA	NA	NA	NA	NA
AIFMPNGTWIVGEMAEAPR	Clostridiales	Order	Bacteria		Firmicutes	Clostridia	Clostridiales				NA	NA	NA	NA	NA	NA	NA	NA	NA	10.111	NA	NA	NA	NA	NA	NA	9.44414	NA	NA	NA	NA	NA	NA	NA
AIFQAIAAK	Mus musculus	Species	Eukaryota	Metazoa	Chordata	Mammalia	Rodentia	Muridae	Mus	Mus musculus	12.5351	13.5372	12.0489	12.5508	NA	13.3936	NA	NA	NA	11.2175	11.677	NA	11.5564	NA	11.1048	NA	10.6371	12.9707	12.6683	12.0164	NA	NA	12.0802	12.4584
AIGAANVDVNHIK	Lachnospiraceae bacterium M18-1	Species	Bacteria		Firmicutes	Clostridia	Clostridiales	Lachnospiraceae		Lachnospiraceae bacterium M18-1	NA	NA	NA	NA	NA	12.4125	13.5141	13.2889	NA	NA	NA	10.623	14.0421	NA	NA	NA	NA	12.2922	10.9311	NA	NA	NA	10.2335	12.3943
AIGADITMAWPDAQIGTMDAK	Lachnospiraceae bacterium 10-1	Species	Bacteria		Firmicutes	Clostridia	Clostridiales	Lachnospiraceae		Lachnospiraceae bacterium 10-1	NA	NA	NA	NA	11.1	NA	NA	NA	NA	NA	NA	NA	10.8266	10.8266	NA	NA	NA	NA	NA	NA	NA	NA	NA	NA
AIGAFQNTQFQLADMATK	Clostridiales	Order	Bacteria		Firmicutes	Clostridia	Clostridiales				NA	NA	10.7622	NA	14.4563	13.7673	14.6106	12.8943	12.5755	NA	13.2911	13.2004	14.7873	14.4868	14.132	NA	12.0009	12.341	14.526	NA	11.9977	NA	14.2711	13.0622
AIGAGAGNPPVVVDETADIEK	Bacteria	Superkingdom	Bacteria								NA	NA	NA	NA	11.8631	11.7081	12.131	NA	12.3118	NA	12.925	12.0459	11.963	12.4337	11.2872	NA	11.624	NA	NA	12.0905	NA	11.917	12.3765	11.8125
AIGAGAGNPPVVVDETANIEK	Bacteria	Superkingdom	Bacteria								NA	9.569	10.948	NA	12.1253	12.7896	12.8262	11.49	10.4891	NA	NA	NA	11.8907	11.7638	11.8606	12.4469	11.6617	11.1445	11.1317	NA	12.541	10.6426	11.8243	12.0022
AIGAVPLIQGEYMIPCEK	Mammalia	Class	Eukaryota	Metazoa	Chordata	Mammalia					11.6213	13.8666	12.2919	13.7935	13.0468	13.9991	11.9294	13.2257	12.8393	12.1509	12.447	12.2598	13.5068	13.0342	11.3881	12.5388	13.0384	13.519	12.7494	12.5094	12.055	12.7221	13.4095	13.6994
AIGGYPFLNGQYFIQCSK	Metazoa	Kingdom	Eukaryota	Metazoa							NA	NA	NA	NA	11.0769	NA	NA	NA	NA	NA	NA	NA	10.4961	NA	NA	NA	NA	NA	NA	NA	NA	NA	NA	NA
AIGIIINNPEFADVR	Bacteria	Superkingdom	Bacteria								NA	NA	NA	NA	11.9132	10.8858	NA	NA	11.0817	NA	NA	NA	12.3167	11.8444	11.4967	NA	11.4665	NA	11.8757	NA	NA	NA	12.0074	11.2044
AIGIILAGGNNK	Bacteria	Superkingdom	Bacteria								NA	NA	NA	NA	NA	NA	NA	NA	NA	NA	NA	NA	11.445	NA	NA	NA	NA	NA	11.445	NA	NA	NA	NA	NA
AIGIISDR	Clostridiales	Order	Bacteria		Firmicutes	Clostridia	Clostridiales				16.0395	16.7794	16.5393	16.7533	16.6968	16.938	17.5933	17.0986	17.2158	15.8733	16.6638	16.2002	16.4144	16.7945	16.6615	18.039	NA	16.6498	16.2684	16.1791	16.4563	NA	17.7914	16.5405
AIGKTPVEVK	Clostridiales	Order	Bacteria		Firmicutes	Clostridia	Clostridiales				11.0354	NA	NA	NA	NA	NA	NA	NA	NA	9.77715	NA	NA	NA	NA	11.6284	NA	NA	NA	NA	NA	NA	NA	11.3199	NA
AIGLVIPELNK	Bacteria	Superkingdom	Bacteria								NA	NA	NA	10.3804	11.9028	NA	12.0272	12.6128	NA	NA	12.3724	10.9982	NA	11.4938	NA	NA	11.9656	12.1104	11.8009	11.9031	NA	11.1333	11.8883	11.6238
AIGLVSEVYPPEELMPK	Clostridiaceae	Family	Bacteria		Firmicutes	Clostridia	Clostridiales	Clostridiaceae			11.7854	12.6424	11.8867	12.174	12.9373	12.5133	13.2021	11.9027	11.8515	12.2777	NA	11.4831	12.061	12.4593	12.1061	12.8172	11.5505	NA	NA	NA	NA	12.7138	12.9911	11.953
AIGLVTVISK	Rodentia	Order	Eukaryota	Metazoa	Chordata	Mammalia	Rodentia				15.2212	16.1816	15.9208	14.6641	14.9519	15.1893	13.9926	14.0692	15.3467	15.4241	14.8546	13.9226	15.3549	14.9142	15.3526	14.9997	16.6532	15.1143	15.0509	14.4411	16.339	15.5436	14.9128	14.3029
AIGLVVPELDGK	Leuconostoc	Genus	Bacteria		Firmicutes	Bacilli	Lactobacillales	Leuconostocaceae	Leuconostoc		17.6496	18.1836	17.4434	16.7947	14.4473	13.9386	14.9137	16.5862	15.5269	15.5646	17.4252	17.3685	14.5561	14.7029	15.6998	16.2861	16.0369	14.2764	15.5501	16.8713	17.153	16.1622	16.117	13.8966
AIGLVVPELNGK	Bacteria	Superkingdom	Bacteria								16.3567	16.5522	15.4628	15.085	NA	12.6933	14.1128	15.2708	14.2061	14.2963	16.2636	15.0506	13.2889	13.0439	14.0666	14.7809	15.2396	14.1933	15.3168	16.0346	15.55	15.2313	14.3224	13.9833
AIGSASEGAQSSLQEVYHK	Metazoa	Kingdom	Eukaryota	Metazoa							12.6128	13.0567	NA	NA	NA	13.8088	NA	NA	12.9266	NA	12.911	13.1914	14.0241	NA	NA	NA	NA	13.0526	12.4997	12.73	12.5273	12.2772	13.8273	13.2227
AIGTDEDLAHSSIR	Eukaryota	Superkingdom	Eukaryota								NA	11.096	NA	NA	NA	NA	NA	NA	NA	NA	NA	NA	NA	NA	NA	NA	NA	NA	NA	NA	NA	NA	NA	NA
AIGVILAGGNNEGR	Clostridium sp. MD294	Species	Bacteria		Firmicutes	Clostridia	Clostridiales	Clostridiaceae	Clostridium	Clostridium sp. MD294	NA	NA	NA	NA	13.08	13.1936	NA	13.1157	13.3329	NA	NA	12.2853	13.2777	NA	13.7155	12.6189	NA	NA	NA	NA	13.6119	NA	14.1312	13.845
AIGVLTSGGDAQGMNAAVR	Chordata	Phylum	Eukaryota	Metazoa	Chordata						10.3379	12.7295	11.524	12.5473	10.8974	12.1548	NA	NA	9.96594	NA	NA	NA	11.0993	NA	11.1105	NA	NA	11.1025	11.1584	10.4609	NA	NA	10.8119	11.0538
AIHEGAGNASLIK	Lactobacillus	Genus	Bacteria		Firmicutes	Bacilli	Lactobacillales	Lactobacillaceae	Lactobacillus		NA	NA	NA	NA	NA	NA	NA	14.7283	NA	NA	NA	NA	NA	NA	NA	NA	NA	NA	NA	NA	NA	NA	NA	NA
AIIAENVVVNDNVK	Lachnospiraceae bacterium 28-4	Species	Bacteria		Firmicutes	Clostridia	Clostridiales	Lachnospiraceae		Lachnospiraceae bacterium 28-4	NA	NA	NA	NA	NA	11.3418	NA	NA	10.5644	NA	9.73421	NA	NA	NA	NA	NA	12.2339	10.3804	NA	NA	NA	NA	NA	NA
AIIDFEGEGVVR	Lachnospiraceae bacterium A4	Species	Bacteria		Firmicutes	Clostridia	Clostridiales	Lachnospiraceae		Lachnospiraceae bacterium A4	14.9459	11.3902	12.2574	12.8333	15.1485	14.0229	15.4142	12.9701	12.052	NA	14.8194	14.3715	14.6082	15.3766	15.2491	13.1915	13.1237	13.4307	14.2783	14.6799	12.4937	13.2992	14.4127	12.2997
AIIDKLEAK	Didymella rabiei	Species	Eukaryota	Fungi	Ascomycota	Dothideomycetes	Pleosporales	Didymellaceae	Ascochyta	Didymella rabiei	NA	NA	NA	NA	NA	11.6499	NA	NA	NA	NA	NA	NA	NA	NA	NA	NA	NA	NA	NA	NA	NA	NA	12.8469	12.9372
AIIEAALAVK	Bacteria	Superkingdom	Bacteria								NA	NA	NA	10.6649	NA	10.4394	NA	NA	NA	NA	NA	NA	12.4757	11.0672	12.7552	NA	NA	NA	13.1496	NA	NA	NA	NA	11.5207
AIIEAALNMK	Bacteria	Superkingdom	Bacteria								NA	NA	NA	NA	NA	NA	NA	NA	NA	NA	11.7669	NA	NA	NA	NA	NA	NA	NA	NA	NA	NA	NA	NA	NA
AIIEAAMNVK	Alistipes	Genus	Bacteria		Bacteroidetes	Bacteroidia	Bacteroidales	Rikenellaceae	Alistipes		NA	13.5835	11.6909	13.7645	NA	12.6611	NA	NA	NA	NA	12.6838	NA	13.6883	12.7152	14.1041	NA	NA	NA	13.2223	11.0201	NA	NA	12.018	13.0112
AIIENLIQK	Mammalia	Class	Eukaryota	Metazoa	Chordata	Mammalia					NA	11.1432	10.4275	11.1664	NA	11.9424	NA	NA	11.1632	NA	NA	NA	NA	NA	NA	NA	NA	11.1764	NA	NA	NA	NA	10.8685	11.2597
AIIFATGGNCR	Mucispirillum schaedleri	Species	Bacteria		Deferribacteres	Deferribacteres	Deferribacterales	Deferribacteraceae	Mucispirillum	Mucispirillum schaedleri	NA	10.8411	NA	11.0143	NA	NA	12.2338	NA	NA	11.2614	NA	10.7896	NA	11.7077	10.8241	11.1524	11.6137	NA	NA	NA	NA	11.3133	NA	NA
AIIGLSDLK	Lachnospiraceae bacterium MD335	Species	Bacteria		Firmicutes	Clostridia	Clostridiales	Lachnospiraceae		Lachnospiraceae bacterium MD335	14.9493	NA	14.5552	NA	16.3997	14.0585	15.1664	16.0795	14.7418	14.0292	15.8775	14.4232	16.0921	16.5179	16.7312	15.5953	15.6811	13.8994	16.6362	16.0811	15.211	15.3177	15.8641	14.536
AIIMISSELPEVMGMSDR	Butyricicoccus pullicaecorum	Species	Bacteria		Firmicutes	Clostridia	Clostridiales	Clostridiaceae	Butyricicoccus	Butyricicoccus pullicaecorum	NA	NA	NA	NA	10.8791	11.9027	10.925	NA	9.67081	NA	NA	NA	11.2008	10.6983	10.6279	NA	10.349	NA	10.2646	NA	NA	NA	10.7637	12.2319
AIINLAVYGK	Chordata	Phylum	Eukaryota	Metazoa	Chordata						NA	NA	NA	NA	NA	10.6868	NA	10.4319	NA	NA	NA	NA	10.8249	NA	NA	NA	NA	NA	NA	NA	NA	NA	NA	NA
AIINLHK	Bacteria	Superkingdom	Bacteria								NA	NA	NA	NA	NA	NA	NA	14.737	NA	NA	NA	13.455	16.1395	NA	NA	NA	NA	NA	12.0897	NA	NA	NA	15.868	12.7797
AIISSGIGFPR	Lachnospiraceae bacterium A4	Species	Bacteria		Firmicutes	Clostridia	Clostridiales	Lachnospiraceae		Lachnospiraceae bacterium A4	13.3496	NA	NA	NA	14.0771	13.362	13.7997	11.9318	13.2107	13.3579	12.467	13.1983	13.6905	13.3522	14.0795	NA	12.554	12.8494	12.6665	15.1348	NA	13.2621	NA	NA
AIITATTTDGSNK	Lachnospiraceae bacterium A4	Species	Bacteria		Firmicutes	Clostridia	Clostridiales	Lachnospiraceae		Lachnospiraceae bacterium A4	NA	NA	12.3986	11.8115	13.5462	13.1156	13.5881	12.6993	13.7238	13.1705	NA	NA	NA	13.9639	NA	12.1955	13.93	12.971	11.3781	11.3083	NA	13.7317	12.5194	NA
AIITPANVTSK	Lachnospiraceae bacterium A4	Species	Bacteria		Firmicutes	Clostridia	Clostridiales	Lachnospiraceae		Lachnospiraceae bacterium A4	NA	NA	NA	NA	15.5365	15.5588	15.805	NA	16.8061	14.9498	NA	NA	NA	15.6337	12.2851	11.8967	14.0893	14.1559	NA	NA	NA	15.0842	15.3636	NA
AIITPEAEKEDEVIK	Lachnospiraceae bacterium MD335	Species	Bacteria		Firmicutes	Clostridia	Clostridiales	Lachnospiraceae		Lachnospiraceae bacterium MD335	13.2912	NA	14.4643	NA	14.0283	12.9322	12.3123	13.5768	13.7852	14.1981	14.6702	14.5122	14.5248	14.0293	13.3054	15.0458	15.7296	13.5026	14.8256	14.2502	13.1254	14.0812	14.0479	13.21
AIIVNQSVPGTAEAFTQIK	Oscillibacter sp. 1-3	Species	Bacteria		Firmicutes	Clostridia	Clostridiales	Oscillospiraceae	Oscillibacter	Oscillibacter sp. 1-3	NA	8.74032	10.5796	9.83144	12.1882	12.2517	11.6988	10.6391	12.1342	NA	11.1597	11.4747	12.8051	12.3623	12.2151	11.2997	11.9046	12.4118	11.3981	10.8525	11.9469	12.2192	11.6278	9.75536
AIIVNQSVPGTTEAFR	Clostridiales	Order	Bacteria		Firmicutes	Clostridia	Clostridiales				14.4496	11.9908	13.6612	13.7019	14.6073	14.8175	14.5954	14.125	15.2525	14.2729	14.2812	14.8834	13.2729	14.8139	14.3295	13.019	14.6154	15.012	14.9713	14.0423	14.8134	15.0848	14.4743	13.3769
AIIVVGGGSMK	Bacteria	Superkingdom	Bacteria								12.4225	12.2284	12.7759	12.5818	14.0704	NA	15.6158	NA	14.1888	12.6565	14.0645	NA	NA	14.1898	14.0871	15.2542	14.2421	NA	15.4164	14.2133	15.1012	13.4293	15.0323	14.3962
AIKVPVSSDATVK	Lachnospiraceae bacterium MD335	Species	Bacteria		Firmicutes	Clostridia	Clostridiales	Lachnospiraceae		Lachnospiraceae bacterium MD335	13.9027	NA	13.7455	11.5147	14.3017	12.7299	12.7381	13.584	13.8472	13.5586	14.2416	15.117	14.33	13.9676	13.4947	14.2933	14.6534	13.2854	14.1493	14.6233	14.651	14.5439	15.0309	13.7469
AILAELTGR	Chordata	Phylum	Eukaryota	Metazoa	Chordata						NA	NA	NA	NA	NA	NA	NA	NA	NA	NA	NA	11.9279	NA	NA	NA	NA	NA	NA	NA	NA	NA	NA	NA	NA
AILATAQECNSPVILGVSEGAGK	Clostridium sp. C105KSO13	Species	Bacteria		Firmicutes	Clostridia	Clostridiales	Clostridiaceae	Clostridium	Clostridium sp. C105KSO13	NA	NA	NA	NA	10.9824	NA	NA	NA	NA	NA	12.1795	11.6799	11.2895	11.5419	NA	10.7778	12.0661	11.417	12.4521	11.1034	12.1305	12.2706	12.1053	NA
AILDNANVSGK	Lactobacillus	Genus	Bacteria		Firmicutes	Bacilli	Lactobacillales	Lactobacillaceae	Lactobacillus		15.5165	15.9248	14.1191	14.6486	NA	NA	14.0404	15.0629	11.798	13.3427	15.6789	15.3191	14.7606	NA	14.8701	14.1314	15.0907	14.3768	15.6309	15.3691	16.053	NA	14.3602	13.6554
AILESGSSNAPWAVK	Muridae	Family	Eukaryota	Metazoa	Chordata	Mammalia	Rodentia	Muridae			NA	NA	NA	NA	NA	11.263	NA	12.6356	11.2152	12.3605	11.7154	12.517	11.5121	12.2241	NA	12.2666	11.6164	12.2227	10.6972	12.4296	11.0221	12.3256	12.0105	11.9294
AILILDNDGDR	Chordata	Phylum	Eukaryota	Metazoa	Chordata						NA	12.3346	NA	12.3368	NA	NA	NA	NA	NA	NA	NA	NA	NA	NA	NA	NA	NA	NA	NA	NA	NA	NA	NA	NA
AILLTAEECK	Clostridiales	Order	Bacteria		Firmicutes	Clostridia	Clostridiales				NA	14.1722	11.8916	14.534	15.8296	15.5885	16.4754	15.9603	13.8741	13.3664	14.1423	NA	15.7128	16.12	13.601	13.2334	15.4679	14.764	13.5427	12.442	12.9274	14.2948	NA	15.6971
AILLTAQELNSPVILGVSEGAGK	Clostridiales	Order	Bacteria		Firmicutes	Clostridia	Clostridiales				12.2308	10.0023	9.48442	NA	13.7129	11.4395	NA	12.5686	10.6347	NA	12.5953	8.0827	13.3485	13.5994	14.2264	NA	11.9128	NA	12.6626	NA	12.153	NA	13.1808	10.4462
AILNNEHR	Lactobacillus	Genus	Bacteria		Firmicutes	Bacilli	Lactobacillales	Lactobacillaceae	Lactobacillus		13.6595	14.6517	NA	NA	NA	NA	12.7288	NA	NA	NA	14.6255	NA	NA	NA	13.6706	13.4935	14.4029	NA	14.2256	14.3023	NA	NA	NA	NA
AILNYIATK	Mammalia	Class	Eukaryota	Metazoa	Chordata	Mammalia					NA	12.0256	NA	11.551	NA	NA	NA	NA	NA	NA	11.0667	NA	NA	NA	NA	NA	NA	NA	NA	NA	NA	NA	NA	NA
AILPCQDTPSVK	Chordata	Phylum	Eukaryota	Metazoa	Chordata						12.9194	14.9225	13.9466	14.4076	11.7888	13.5148	10.6021	12.0547	12.661	10.5707	12.3241	12.3796	13.614	12.1777	NA	11.889	11.6549	12.695	13.3042	12.8851	NA	NA	13.2281	13.3621
AILPFFPK	Mammalia	Class	Eukaryota	Metazoa	Chordata	Mammalia					NA	NA	NA	NA	NA	12.1041	NA	12.5243	NA	NA	NA	13.0618	14.1802	NA	NA	NA	NA	NA	13.4876	NA	13.0305	NA	13.1564	NA
AILQDLMDNINPAK	Lachnospiraceae bacterium MD335	Species	Bacteria		Firmicutes	Clostridia	Clostridiales	Lachnospiraceae		Lachnospiraceae bacterium MD335	NA	NA	NA	NA	12.1597	NA	NA	NA	NA	NA	NA	NA	12.0041	11.9208	11.5066	NA	NA	NA	NA	NA	NA	NA	NA	NA
AILQQLGLNSTCDDSILVK	Mammalia	Class	Eukaryota	Metazoa	Chordata	Mammalia					8.21508	10.5566	8.72858	10.1501	NA	10.5881	NA	NA	10.1501	NA	NA	NA	NA	NA	NA	9.84836	NA	8.963	NA	NA	NA	NA	NA	10.2945
AILQTAQELNSPVILGVSEGAGK	Clostridiales	Order	Bacteria		Firmicutes	Clostridia	Clostridiales				13.9882	NA	13.313	12.2371	16.0757	14.443	16.7475	14.7834	14.5184	NA	14.2097	14.3785	16.3524	15.8006	16.834	14.9291	15.5839	13.3255	11.8065	13.2291	14.3179	15.1517	16.088	14.6727
AILSYLAAK	Mammalia	Class	Eukaryota	Metazoa	Chordata	Mammalia					NA	NA	NA	NA	NA	10.4965	NA	NA	NA	NA	NA	NA	NA	NA	NA	NA	NA	NA	10.1928	NA	NA	NA	NA	10.6097
AILVDLEPGTMDSVR	Eukaryota	Superkingdom	Eukaryota								11.8344	12.4481	11.7441	12.0387	NA	11.9134	NA	NA	NA	NA	NA	NA	NA	NA	NA	NA	NA	NA	12.1748	NA	NA	NA	NA	11.3788
AILVLGGGSMK	Lachnospiraceae	Family	Bacteria		Firmicutes	Clostridia	Clostridiales	Lachnospiraceae			NA	NA	NA	NA	NA	NA	NA	NA	10.4626	NA	NA	NA	12.2764	10.4922	11.616	NA	NA	NA	10.2345	NA	NA	NA	11.7911	NA
AILVVGGGSMK	Clostridiales	Order	Bacteria		Firmicutes	Clostridia	Clostridiales				12.7285	NA	NA	NA	12.986	NA	NA	13.4979	NA	NA	NA	10.9599	13.0531	12.6678	13.2378	NA	12.4135	NA	13.5782	NA	NA	NA	NA	NA
AILVYGQMNEPPGAR	Desulfovibrionaceae	Family	Bacteria		Proteobacteria	Deltaproteobacteria	Desulfovibrionales	Desulfovibrionaceae			11.481	NA	NA	NA	NA	11.3734	NA	NA	NA	NA	12.0132	NA	NA	NA	12.1404	NA	NA	NA	NA	NA	NA	NA	NA	NA
AIMAQLPQEQK	Chordata	Phylum	Eukaryota	Metazoa	Chordata						12.8434	13.728	12.2137	12.8508	NA	14.1796	NA	NA	NA	NA	11.6823	NA	NA	NA	11.3372	NA	NA	12.9491	13.3295	12.4935	11.4164	NA	12.2859	13.8443
AIMDSDIK	Lachnospiraceae bacterium A4	Species	Bacteria		Firmicutes	Clostridia	Clostridiales	Lachnospiraceae		Lachnospiraceae bacterium A4	NA	NA	NA	NA	13.6649	NA	12.934	NA	12.5789	NA	NA	NA	NA	13.602	NA	NA	12.5202	NA	NA	NA	NA	12.1404	NA	NA
AIMEAAIEVK	Clostridia	Class	Bacteria		Firmicutes	Clostridia					NA	NA	NA	NA	NA	NA	NA	NA	NA	NA	NA	NA	13.4566	NA	NA	NA	NA	NA	14.3163	NA	NA	NA	NA	NA
AIMNLDVEQYR	Metazoa	Kingdom	Eukaryota	Metazoa							14.8658	15.7416	15.4533	15.8229	14.6832	15.0612	12.6436	14.4353	15.1844	15.1316	14.356	15.0784	14.8769	14.6244	14.4858	15.3878	14.5538	14.9958	14.1142	14.4512	14.2119	15.0264	15.7494	14.7967
AIMTTDTVNK	Clostridiales	Order	Bacteria		Firmicutes	Clostridia	Clostridiales				15.3375	11.48	13.1095	11.6515	14.1938	13.1384	14.7939	13.1128	13.5292	13.3285	13.998	15.4417	13.6741	14.3482	14.4856	14.1617	14.1415	13.8824	14.0421	15.2946	NA	13.0931	13.9741	NA
AINEGLDVDMDK	Bacteria	Superkingdom	Bacteria								14.1947	12.0083	13.1455	12.4684	15.9028	14.7603	15.8554	13.6211	14.463	13.8693	14.0879	12.6828	15.2917	16.0461	15.657	14.3852	14.4486	14.4747	14.186	13.9724	13.8839	14.4055	15.5812	13.7586
AINEGLDVDMDKAIVIEEK	Bacteria	Superkingdom	Bacteria								NA	NA	NA	NA	NA	10.7022	11.2777	NA	NA	NA	NA	NA	NA	NA	10.6223	NA	NA	NA	NA	NA	NA	NA	11.3698	NA
AINEIRPLAAEVDLIPR	Clostridiales	Order	Bacteria		Firmicutes	Clostridia	Clostridiales				NA	NA	NA	11.1286	13.9737	14.624	13.0352	13.1477	NA	NA	NA	NA	14.3821	14.412	13.3039	12.231	11.7223	10.6488	13.0469	10.9464	NA	11.8207	11.6197	13.2321
AINLLEVDDEHAAK	Anaerotruncus sp. G3(2012)	Species	Bacteria		Firmicutes	Clostridia	Clostridiales	Ruminococcaceae	Anaerotruncus	Anaerotruncus sp. G3(2012)	NA	NA	11.7237	NA	12.7122	12.336	12.8199	13.0103	13.7266	13.775	11.6343	12.0873	11.7323	12.69	12.4445	13.5987	NA	13.4001	NA	12.2306	13.925	14.5724	14.3312	15.6883
AINLTVTTGESR	Dorea sp. 5-2	Species	Bacteria		Firmicutes	Clostridia	Clostridiales	Lachnospiraceae	Dorea	Dorea sp. 5-2	NA	NA	NA	NA	NA	NA	NA	NA	NA	NA	NA	NA	NA	NA	NA	NA	NA	12.2247	NA	11.7277	NA	NA	NA	NA
AINLTYEK	Lachnospiraceae bacterium A2	Species	Bacteria		Firmicutes	Clostridia	Clostridiales	Lachnospiraceae		Lachnospiraceae bacterium A2	NA	NA	NA	NA	NA	13.5771	NA	13.9828	NA	NA	NA	NA	NA	13.6364	NA	NA	NA	NA	NA	NA	NA	NA	NA	NA
AINQGGLTSVAVR	Metazoa	Kingdom	Eukaryota	Metazoa							14.5853	16.4645	15.7628	16.732	14.8725	15.096	13.5817	14.9961	15.4648	14.5984	14.8741	14.9849	15.4352	14.9525	14.5676	15.486	15.0824	15.0968	14.6321	15.1233	14.8069	14.6193	16.2654	15.4301
AINVTPVMYATAGTYNFATLK	Lachnospiraceae bacterium MD335	Species	Bacteria		Firmicutes	Clostridia	Clostridiales	Lachnospiraceae		Lachnospiraceae bacterium MD335	NA	NA	NA	NA	9.96187	NA	10.2718	NA	NA	8.88736	NA	NA	10.0765	NA	NA	NA	10.2193	9.37967	9.78447	10.195	10.4571	NA	NA	9.61479
AINYLISGYQR	Mammalia	Class	Eukaryota	Metazoa	Chordata	Mammalia					NA	NA	NA	11.5544	NA	NA	NA	NA	NA	NA	NA	NA	NA	NA	NA	NA	NA	NA	NA	NA	NA	NA	11.7879	NA
AIPAEVDALVEK	Dorea sp. 5-2	Species	Bacteria		Firmicutes	Clostridia	Clostridiales	Lachnospiraceae	Dorea	Dorea sp. 5-2	NA	NA	NA	11.2537	NA	NA	NA	NA	NA	NA	NA	NA	NA	NA	11.1384	NA	12.1775	NA	NA	NA	NA	11.0542	NA	NA
AIPETANNTEDPNKK	Lachnospiraceae bacterium MD335	Species	Bacteria		Firmicutes	Clostridia	Clostridiales	Lachnospiraceae		Lachnospiraceae bacterium MD335	NA	NA	10.744	NA	10.0463	NA	NA	NA	10.3434	NA	NA	NA	NA	10.2117	NA	11.2188	10.6871	NA	9.99985	NA	9.56808	NA	9.31319	9.50409
AIPFEPYAK	Firmicutes	Phylum	Bacteria		Firmicutes						13.5475	14.1082	NA	14.5438	14.8762	15.2713	15.1834	15.2181	14.7035	14.028	14.8215	13.6641	15.2032	14.8407	15.3565	15.2506	15.2338	15.3131	14.5149	15.0241	14.6957	15.359	15.3306	14.9985
AIPIVGQVLER	Mus musculus	Species	Eukaryota	Metazoa	Chordata	Mammalia	Rodentia	Muridae	Mus	Mus musculus	13.3784	12.6611	14.5948	13.9665	12.199	12.3029	11.7795	12.6343	12.5744	12.6843	13.2096	12.8575	12.9507	12.7409	12.8688	13.2659	13.2447	12.0845	12.797	11.9544	12.2633	12.175	12.9703	13.8662
AIPNPGPFANER	Mus musculus	Species	Eukaryota	Metazoa	Chordata	Mammalia	Rodentia	Muridae	Mus	Mus musculus	NA	12.9594	13.8768	12.0905	NA	13.3027	NA	NA	NA	NA	NA	NA	NA	NA	NA	NA	NA	NA	NA	NA	NA	NA	NA	NA
AIPNQGEILVIR	Chordata	Phylum	Eukaryota	Metazoa	Chordata						NA	11.8041	10.7098	11.5681	NA	11.425	NA	NA	NA	NA	NA	NA	NA	NA	NA	NA	NA	NA	NA	NA	NA	NA	NA	NA
AIPTMLDYR	Bacteroidia	Class	Bacteria		Bacteroidetes	Bacteroidia					15.4733	14.843	15.658	14.8336	13.9371	13.6549	12.5682	13.4227	13.569	13.2053	16.4807	13.9762	13.3481	13.9824	13.932	11.8191	14.062	12.9644	14.1423	13.5966	13.2234	NA	14.0371	13.6318
AIPVCCGSAYR	Clostridium saccharolyticum	Species	Bacteria		Firmicutes	Clostridia	Clostridiales	Lachnospiraceae	Lacrimispora	Clostridium saccharolyticum	15.2814	13.1558	13.4577	12.9381	14.884	15.8883	NA	14.2136	14.7761	14.1456	14.8168	13.2811	15.8105	14.8413	NA	14.9238	14.1693	13.1114	17.0098	14.8044	14.4735	11.0954	14.1896	17.0643
AIPYDLPIVGYGNGIVNTLR	Clostridium	Genus	Bacteria		Firmicutes	Clostridia	Clostridiales	Clostridiaceae	Clostridium		NA	NA	NA	NA	NA	NA	NA	NA	NA	NA	NA	NA	9.98311	NA	NA	NA	NA	NA	NA	NA	NA	NA	NA	NA
AIPYDLPVVGYGNGIVNTLR	Lachnospiraceae bacterium A4	Species	Bacteria		Firmicutes	Clostridia	Clostridiales	Lachnospiraceae		Lachnospiraceae bacterium A4	10.569	NA	NA	NA	NA	NA	NA	NA	NA	NA	NA	NA	NA	9.90531	NA	NA	NA	NA	NA	11.05	NA	NA	NA	NA
AIQDAMEK	Clostridiales	Order	Bacteria		Firmicutes	Clostridia	Clostridiales				NA	12.5353	NA	NA	NA	13.1384	13.0517	NA	NA	NA	12.2708	NA	NA	12.3219	14.0667	NA	12.0526	12.0059	12.7771	NA	NA	NA	NA	NA
AIQDGDFFENK	Clostridiales	Order	Bacteria		Firmicutes	Clostridia	Clostridiales				NA	11.8113	11.1861	12.5079	13.196	12.1157	13.332	12.1673	12.9967	NA	12.8561	11.969	14.0656	13.2678	14.4177	12.7308	12.9213	12.8054	12.2186	11.6806	11.9332	12.1295	12.4073	13.3384
AIQEAEAYPGPSLIIGYSPCEMHSIK	Oscillibacter sp. 1-3	Species	Bacteria		Firmicutes	Clostridia	Clostridiales	Oscillospiraceae	Oscillibacter	Oscillibacter sp. 1-3	NA	NA	NA	NA	NA	NA	NA	NA	NA	NA	NA	NA	NA	NA	9.567	NA	9.02876	NA	10.9504	NA	NA	NA	NA	NA
AIQEEIIK	Bacteria	Superkingdom	Bacteria								13.5613	12.7049	13.1919	NA	NA	NA	NA	NA	NA	NA	12.9484	12.8826	NA	NA	NA	NA	NA	NA	NA	12.8828	NA	NA	NA	NA
AIQEEIIKK	Lactobacillus	Genus	Bacteria		Firmicutes	Bacilli	Lactobacillales	Lactobacillaceae	Lactobacillus		NA	NA	NA	NA	NA	13.4291	12.4446	14.3596	13.69	14.7727	NA	14.5299	12.7627	NA	NA	NA	NA	NA	NA	NA	12.9343	NA	11.8427	13.5101
AIQESDLGINPQNDGK	Clostridiales	Order	Bacteria		Firmicutes	Clostridia	Clostridiales				12.2619	10.4804	10.6602	10.0127	12.821	12.4816	12.3303	NA	12.1143	NA	12.3626	9.94056	13.9304	12.7392	12.9188	11.2759	11.6011	11.0597	13.2909	11.7963	NA	9.531	12.9768	13.0705
AIQGDQWGEK	Lachnospiraceae bacterium A4	Species	Bacteria		Firmicutes	Clostridia	Clostridiales	Lachnospiraceae		Lachnospiraceae bacterium A4	16.7576	NA	13.4339	12.083	16.5317	13.7909	16.4712	14.7585	16.4159	15.5932	15.8904	18.0031	15.8256	16.5253	14.5664	14.357	16.6448	16.5925	16.0361	17.5572	15.8957	16.7603	15.8788	NA
AIQLEYSEAR	Metazoa	Kingdom	Eukaryota	Metazoa							NA	12.5173	NA	NA	NA	12.5501	NA	NA	NA	NA	NA	NA	NA	NA	NA	NA	NA	NA	NA	NA	NA	NA	NA	NA
AIQLGIAK	Bacteria	Superkingdom	Bacteria								12.2649	13.8149	11.7814	NA	NA	NA	10.9289	13.1876	NA	NA	13.0213	13.0876	12.7928	NA	12.2561	NA	13.0243	11.9244	13.0898	13.1826	12.1568	12.5965	12.2742	NA
AIQNSDLGINPQNDGK	Oscillibacter	Genus	Bacteria		Firmicutes	Clostridia	Clostridiales	Oscillospiraceae	Oscillibacter		11.5065	11.0262	10.666	11.0981	11.6127	10.907	11.8712	NA	NA	NA	11.8265	NA	13.1478	11.9734	12.7091	NA	NA	NA	13.2368	10.7097	NA	NA	12.4667	11.013
AIQTIDNMSFINK	Lachnospiraceae	Family	Bacteria		Firmicutes	Clostridia	Clostridiales	Lachnospiraceae			NA	NA	10.4972	NA	11.9746	NA	12.2978	12.0747	NA	NA	NA	NA	NA	11.8213	NA	13.568	NA	NA	NA	NA	13.7128	NA	NA	NA
AIQTIDNMSFINKK	Lachnospiraceae	Family	Bacteria		Firmicutes	Clostridia	Clostridiales	Lachnospiraceae			NA	NA	NA	NA	NA	11.2279	11.4488	11.1579	NA	NA	NA	NA	9.32978	NA	NA	11.5034	NA	NA	NA	NA	12.0444	NA	NA	NA
AIQTSDLGINPTNDGK	Clostridiales	Order	Bacteria		Firmicutes	Clostridia	Clostridiales				12.9393	11.366	11.0067	11.8587	12.8668	13.6309	13.5027	13.6024	13.6935	11.0974	12.0487	13.3129	11.6391	12.963	11.739	12.1794	13.4856	13.3714	11.9644	12.9683	11.5411	14.3038	12.8873	12.6213
AIQVSDLGINPTNDGSTIR	Lachnospiraceae bacterium M18-1	Species	Bacteria		Firmicutes	Clostridia	Clostridiales	Lachnospiraceae		Lachnospiraceae bacterium M18-1	NA	NA	NA	NA	NA	NA	NA	NA	NA	NA	NA	NA	9.69986	NA	NA	NA	NA	NA	NA	NA	NA	NA	10.7869	12.1257
AIRDEDGIIVDFETTGEFPK	Lachnospiraceae bacterium A4	Species	Bacteria		Firmicutes	Clostridia	Clostridiales	Lachnospiraceae		Lachnospiraceae bacterium A4	12.9694	11.2181	12.8563	NA	13.6272	NA	14.0342	13.74	NA	12.1378	NA	NA	NA	13.1609	12.1018	12.6751	NA	12.3717	13.0474	NA	12.1854	13.5573	12.5978	NA
AIRPVTESDAEK	Bacteroidales	Order	Bacteria		Bacteroidetes	Bacteroidia	Bacteroidales				10.4988	11.1545	NA	11.2881	9.29992	NA	NA	NA	NA	NA	12.202	NA	11.1833	NA	10.9974	NA	NA	NA	12.0596	NA	NA	NA	9.86506	10.9632
AISDDLTNK	Mucispirillum schaedleri	Species	Bacteria		Deferribacteres	Deferribacteres	Deferribacterales	Deferribacteraceae	Mucispirillum	Mucispirillum schaedleri	NA	NA	NA	NA	11.8128	NA	12.5146	NA	NA	NA	NA	NA	NA	NA	12.2166	11.3287	NA	12.7963	NA	NA	NA	NA	NA	13.3089
AISEGYKDFR	Mammalia	Class	Eukaryota	Metazoa	Chordata	Mammalia					NA	NA	NA	NA	NA	NA	NA	13.1975	NA	NA	NA	12.9524	NA	NA	NA	NA	NA	NA	NA	NA	NA	NA	NA	NA
AISESGVAFIPGMFTK	Muridae	Family	Eukaryota	Metazoa	Chordata	Mammalia	Rodentia	Muridae			11.854	13.4025	13.199	14.7104	12.4031	13.4709	NA	12.4261	12.6199	12.495	12.3054	12.1755	12.8363	12.0993	11.7296	12.7077	12.0791	13.3442	12.5381	12.1509	NA	12.9549	13.447	13.1302
AISESGVVINTNVGK	Mus musculus	Species	Eukaryota	Metazoa	Chordata	Mammalia	Rodentia	Muridae	Mus	Mus musculus	NA	11.6401	10.4899	11.7512	9.84665	10.5567	NA	NA	9.98691	NA	NA	NA	10.3085	NA	NA	NA	10.4975	10.0176	NA	NA	NA	NA	11.5191	10.5631
AISETASEQAEAMK	Lachnospiraceae bacterium A4	Species	Bacteria		Firmicutes	Clostridia	Clostridiales	Lachnospiraceae		Lachnospiraceae bacterium A4	NA	NA	9.34674	9.68397	13.1124	11.8527	11.8407	NA	NA	NA	NA	NA	NA	12.9591	NA	NA	10.4848	10.67	11.4978	NA	NA	NA	11.6499	NA
AISISENEEWKR	Mus musculus	Species	Eukaryota	Metazoa	Chordata	Mammalia	Rodentia	Muridae	Mus	Mus musculus	NA	11.4903	NA	NA	NA	10.5687	NA	NA	NA	NA	NA	NA	NA	NA	NA	NA	NA	NA	NA	NA	NA	NA	NA	NA
AISQGVESVKK	Chordata	Phylum	Eukaryota	Metazoa	Chordata						NA	NA	NA	NA	NA	10.6583	NA	NA	NA	NA	NA	NA	NA	NA	NA	NA	NA	NA	NA	NA	NA	NA	NA	NA
AISQLFGDK	Alistipes	Genus	Bacteria		Bacteroidetes	Bacteroidia	Bacteroidales	Rikenellaceae	Alistipes		14.9049	15.5794	15.037	16.6769	15.2694	16.0184	14.1815	15.2349	14.8146	14.4328	15.6082	13.9125	15.3096	15.2414	14.9658	14.8405	14.807	13.6669	15.7251	14.19	14.4039	13.8024	14.9888	NA
AISQLFGDR	Alistipes putredinis	Species	Bacteria		Bacteroidetes	Bacteroidia	Bacteroidales	Rikenellaceae	Alistipes	Alistipes putredinis	12.9759	13.9845	13.1542	14.006	NA	12.6562	NA	12.9929	12.3421	NA	13.4898	NA	14.3827	NA	13.1165	NA	NA	NA	13.6136	12.7414	NA	NA	NA	12.7822
AISQSGMALSPWAIQK	Mus musculus	Species	Eukaryota	Metazoa	Chordata	Mammalia	Rodentia	Muridae	Mus	Mus musculus	14.3691	12.8778	13.8861	12.3532	12.5135	12.3536	12.9001	12.8258	12.9974	13.634	13.3746	12.2612	12.1604	12.6433	NA	11.8329	12.8387	NA	13.8329	12.3495	13.3223	NA	12.763	11.3944
AITDAINR	Ixeridium dentatum	Species	Eukaryota	Viridiplantae	Streptophyta	Magnoliopsida	Asterales	Asteraceae	Ixeridium	Ixeridium dentatum	NA	NA	NA	NA	14.8897	NA	NA	NA	NA	NA	NA	NA	NA	NA	16.4884	NA	NA	NA	NA	NA	NA	NA	NA	NA
AITDGEKPVTELGVK	Lactobacillus murinus	Species	Bacteria		Firmicutes	Bacilli	Lactobacillales	Lactobacillaceae	Lactobacillus	Lactobacillus murinus	NA	NA	NA	NA	NA	NA	NA	13.1246	NA	NA	NA	12.2683	11.4789	NA	NA	NA	NA	NA	NA	NA	NA	NA	NA	NA
AITDYAQEK	Bacteria	Superkingdom	Bacteria								NA	13.5623	13.8514	14.1656	12.4385	NA	NA	NA	NA	NA	NA	NA	NA	12.3963	14.8243	NA	NA	NA	NA	NA	14.3401	NA	13.4671	NA
AITDYHNVK	Lachnospiraceae bacterium MD335	Species	Bacteria		Firmicutes	Clostridia	Clostridiales	Lachnospiraceae		Lachnospiraceae bacterium MD335	NA	NA	NA	NA	13.3987	NA	NA	NA	NA	NA	12.7307	11.8057	13.598	13.3738	NA	NA	NA	NA	14.4091	13.1476	NA	NA	13.1459	12.907
AITEIYLTR	Chordata	Phylum	Eukaryota	Metazoa	Chordata						NA	NA	NA	NA	NA	11.6329	NA	NA	NA	NA	NA	NA	NA	NA	NA	NA	NA	11.1698	NA	NA	NA	NA	NA	11.229
AITELAESLFEK	Lactobacillus reuteri	Species	Bacteria		Firmicutes	Bacilli	Lactobacillales	Lactobacillaceae	Lactobacillus	Lactobacillus reuteri	13.9199	14.3693	12.8053	12.3881	NA	NA	11.03	13.2796	NA	NA	NA	12.2676	11.9591	NA	11.3594	12.9383	12.2638	11.8975	12.0823	NA	12.2145	12.5921	10.8819	NA
AITGASLADIMAK	Metazoa	Kingdom	Eukaryota	Metazoa							NA	13.1234	12.2674	12.5851	NA	NA	NA	NA	NA	NA	NA	NA	NA	NA	NA	NA	NA	NA	NA	NA	NA	NA	NA	12.2894
AITGFDDPFSGK	Mammalia	Class	Eukaryota	Metazoa	Chordata	Mammalia					11.0828	11.6983	11.3351	NA	NA	NA	NA	NA	NA	NA	NA	NA	NA	NA	NA	NA	NA	NA	NA	NA	NA	NA	NA	NA
AITIAGVPQSVTECVK	Mammalia	Class	Eukaryota	Metazoa	Chordata	Mammalia					NA	11.6931	NA	11.3699	NA	NA	NA	NA	NA	NA	NA	NA	NA	NA	NA	NA	NA	NA	NA	NA	NA	NA	NA	NA
AITLGHVQR	Lactobacillaceae	Family	Bacteria		Firmicutes	Bacilli	Lactobacillales	Lactobacillaceae			NA	NA	NA	NA	NA	NA	NA	NA	NA	NA	NA	12.2416	NA	NA	NA	NA	NA	NA	NA	NA	NA	NA	NA	NA
AITPAEMEK	Bacteria	Superkingdom	Bacteria								NA	NA	NA	NA	13.7789	15.4756	14.6028	16.2708	14.6223	14.3606	NA	NA	14.5213	14.0528	15.0042	NA	15.399	15.7149	NA	NA	NA	14.8604	15.9216	14.4788
AITPGVVVETGSR	Eubacterium plexicaudatum	Species	Bacteria		Firmicutes	Clostridia	Clostridiales	Eubacteriaceae	Eubacterium	Eubacterium plexicaudatum	NA	11.7693	11.1237	11.141	13.4714	NA	NA	12.3215	NA	NA	12.4383	NA	NA	13.4808	NA	13.1498	NA	NA	NA	NA	11.1776	NA	NA	NA
AITTSLTTK	Chordata	Phylum	Eukaryota	Metazoa	Chordata						NA	11.6538	NA	NA	NA	11.5502	NA	NA	NA	NA	10.7667	NA	NA	NA	NA	NA	NA	11.8191	NA	NA	NA	NA	NA	NA
AITVHPEK	Chordata	Phylum	Eukaryota	Metazoa	Chordata						12.4218	12.3946	NA	NA	NA	12.699	11.632	NA	NA	11.9114	12.0783	NA	12.0893	NA	11.4706	NA	11.0819	12.2244	12.2331	11.7365	NA	NA	NA	NA
AIVAGDQNVEYK	Mammalia	Class	Eukaryota	Metazoa	Chordata	Mammalia					13.8097	16.7255	15.7402	15.3213	13.0645	14.9048	NA	12.8453	14.199	12.1743	12.9391	13.4068	13.8498	12.8834	13.673	12.7377	13.7278	13.8167	13.9231	13.6711	12.464	11.924	14.3964	14.2611
AIVAIENPADVSVISSR	Metazoa	Kingdom	Eukaryota	Metazoa							11.0522	13.2457	13.0358	12.7535	10.8337	12.9666	NA	11.4544	NA	NA	10.075	9.90962	11.7281	NA	11.2553	NA	NA	10.298	11.6997	10.3303	NA	NA	10.799	11.7798
AIVDALPPPCESACSLPTDVDK	Metazoa	Kingdom	Eukaryota	Metazoa							NA	10.6455	10.2293	NA	NA	NA	NA	NA	NA	NA	NA	NA	NA	NA	NA	NA	NA	NA	NA	NA	NA	NA	NA	NA
AIVDKLEEK	Clostridium sp. MD294	Species	Bacteria		Firmicutes	Clostridia	Clostridiales	Clostridiaceae	Clostridium	Clostridium sp. MD294	NA	NA	NA	NA	NA	16.2098	15.5477	NA	13.8254	NA	NA	14.768	14.9689	NA	NA	NA	NA	14.9844	15.3647	15.196	14.8708	NA	15.4067	16.4739
AIVDNGEYLESAAGYAK	Alistipes sp. CHKCI003	Species	Bacteria		Bacteroidetes	Bacteroidia	Bacteroidales	Rikenellaceae	Alistipes	Alistipes sp. CHKCI003	10.7991	11.7564	12.127	13.5988	12.3759	12.5481	10.6611	11.5393	11.6267	9.93614	12.5488	10.0994	13.9275	12.5341	12.4918	11.7125	11.174	10.4547	12.7893	11.4602	11.1676	NA	12.362	12.5819
AIVEGINIVSK	Prevotella rara	Species	Bacteria		Bacteroidetes	Bacteroidia	Bacteroidales	Prevotellaceae	Prevotella	Prevotella rara	12.4284	NA	13.2229	13.9495	13.246	13.0952	NA	13.1145	12.304	NA	13.804	NA	13.3801	13.2177	14.8102	NA	12.5656	11.4979	14.1001	13.9094	11.6446	NA	12.2276	12.8907
AIVEGINMVTK	Rhodonellum	Genus	Bacteria		Bacteroidetes	Cytophagia	Cytophagales	Cytophagaceae	Rhodonellum		15.6714	17.6589	16.8116	17.2766	15.5919	15.8897	12.8866	14.7768	14.3456	NA	16.1074	NA	16.4268	15.5576	16.3171	15.2402	14.3469	12.8641	16.087	15.1631	15.1495	NA	16.4136	16.4531
AIVEGVNMVTK	Bacteroidetes	Phylum	Bacteria		Bacteroidetes						15.3894	15.5766	14.3255	15.6708	15.0361	14.5316	12.7175	14.96	13.9473	NA	14.5575	15.1783	NA	15.0062	14.1722	13.4093	13.7255	14.0667	14.5377	14.779	13.022	13.1474	15.907	14.9615
AIVGGTTAEK	Anaerotruncus sp. G3(2012)	Species	Bacteria		Firmicutes	Clostridia	Clostridiales	Ruminococcaceae	Anaerotruncus	Anaerotruncus sp. G3(2012)	14.097	14.1102	13.6379	14.0811	15.4418	14.9396	15.4315	NA	NA	15.461	14.8831	NA	NA	15.5912	15.2757	14.9738	15.2635	16.3034	15.3726	15.4159	NA	15.4102	15.2757	NA
AIVGLSDLK	Clostridium	Genus	Bacteria		Firmicutes	Clostridia	Clostridiales	Clostridiaceae	Clostridium		16.5304	15.6795	16.2069	15.5365	17.261	15.7324	17.7035	16.2913	16.7293	15.2831	15.3697	14.2414	17.232	17.0976	18.7291	17.0802	17.0411	17.034	14.5261	14.4354	16.6872	16.4246	17.1628	14.8727
AIVGLSELK	Dorea sp. 5-2	Species	Bacteria		Firmicutes	Clostridia	Clostridiales	Lachnospiraceae	Dorea	Dorea sp. 5-2	NA	NA	NA	NA	NA	12.9233	15.4041	14.5367	NA	NA	14.322	NA	NA	12.3354	NA	NA	13.3438	NA	NA	NA	NA	12.6297	13.1266	12.7398
AIVNAILDGEVDK	Mucispirillum schaedleri	Species	Bacteria		Deferribacteres	Deferribacteres	Deferribacterales	Deferribacteraceae	Mucispirillum	Mucispirillum schaedleri	NA	NA	NA	NA	NA	NA	NA	NA	NA	NA	NA	NA	14.8135	12.4123	12.0589	NA	NA	NA	NA	NA	NA	NA	NA	NA
AIVNDVFEK	Clostridiales	Order	Bacteria		Firmicutes	Clostridia	Clostridiales				18.1212	16.4068	17.4329	16.6378	17.7028	16.5462	18.3435	15.943	18.1188	16.9228	17.7308	17.2434	16.8353	17.7508	17.4983	16.998	17.1106	16.6035	15.631	17.4749	13.4627	16.585	17.5862	14.4386
AIVNNAFK	Chordata	Phylum	Eukaryota	Metazoa	Chordata						NA	NA	NA	NA	NA	12.868	NA	NA	NA	NA	NA	NA	NA	NA	NA	NA	NA	NA	NA	11.3287	NA	NA	NA	NA
AIVNQPFAVTK	Lactobacillus reuteri	Species	Bacteria		Firmicutes	Bacilli	Lactobacillales	Lactobacillaceae	Lactobacillus	Lactobacillus reuteri	14.6881	16.0105	13.7223	14.2452	NA	NA	12.1247	14.1867	11.5935	10.9803	14.1555	14.9682	13.4974	NA	12.7703	13.0623	13.5411	12.3932	13.5411	13.818	14.1398	13.2333	13.0826	12.7997
AIVQLTADSK	Firmicutes	Phylum	Bacteria		Firmicutes						12.6597	13.0946	13.1172	NA	NA	NA	13.6378	NA	13.3761	NA	NA	13.3145	13.6062	NA	14.2601	13.4088	12.8363	13.1816	13.9248	14.2962	12.5312	NA	13.0901	NA
AIVQLTEDSK	Bacteria	Superkingdom	Bacteria								14.3513	13.4276	14.1761	13.3418	15.4706	14.7032	15.5062	14.5615	15.1372	13.9495	14.6257	14.7417	15.7968	15.5782	15.5108	14.7452	14.9807	14.8301	15.4034	14.8173	14.5762	14.1698	15.1006	14.7711
AIVQLVNK	Rodentia	Order	Eukaryota	Metazoa	Chordata	Mammalia	Rodentia				10.5578	12.5931	NA	12.2334	NA	12.371	NA	NA	12.1971	NA	NA	NA	NA	NA	NA	NA	NA	12.2786	NA	NA	NA	NA	NA	NA
AIVRDPQVFLLDEPLSNLDAK	Bacteria	Superkingdom	Bacteria								NA	10.3997	NA	12.3912	NA	12.6476	NA	12.1654	11.3492	NA	11.1508	NA	NA	NA	14.2495	NA	10.4349	10.7365	14.2522	NA	NA	NA	NA	NA
AIVRDPQVFLMDEPLSNLDAK	Bacteria	Superkingdom	Bacteria								NA	9.42852	NA	12.1683	11.0144	NA	11.4057	NA	NA	NA	NA	NA	12.2893	11.0304	NA	NA	NA	NA	NA	NA	NA	NA	12.0922	NA
AIVREPQVFLMDEPLSNLDAK	Bacteria	Superkingdom	Bacteria								NA	NA	NA	NA	10.2933	12.9415	11.0828	11.0919	NA	NA	NA	NA	NA	10.3178	11.5454	NA	NA	NA	12.024	NA	NA	NA	NA	13.2557
AIVTLTEDSK	Bacteria	Superkingdom	Bacteria								NA	NA	NA	NA	NA	NA	NA	NA	NA	NA	NA	NA	NA	NA	NA	NA	NA	NA	NA	NA	NA	NA	NA	14.1666
AIVTLTEDSNDIK	Lactobacillus	Genus	Bacteria		Firmicutes	Bacilli	Lactobacillales	Lactobacillaceae	Lactobacillus		12.9444	14.3849	12.0901	12.8306	NA	NA	12.0098	13.8824	NA	NA	13.5893	13.4756	13.2402	NA	12.8887	12.786	NA	11.718	13.4478	13.5425	14.1374	11.9697	12.6825	11.6972
AIVVEGVK	Pedobacter	Genus	Bacteria		Bacteroidetes	Sphingobacteriia	Sphingobacteriales	Sphingobacteriaceae	Pedobacter		12.7349	13.2416	13.2681	12.8798	12.2322	NA	NA	NA	NA	NA	13.879	NA	NA	NA	NA	NA	NA	NA	13.5246	12.6631	NA	NA	NA	NA
AIVVNQAVPGTTEAFR	Candidatus Vecturithrix granuli	Species	Bacteria						Candidatus Vecturithrix	Candidatus Vecturithrix granuli	NA	NA	NA	NA	12.9678	11.6712	NA	11.2943	NA	NA	NA	13.4788	13.2425	12.8152	14.3259	14.2459	NA	NA	NA	NA	12.9897	12.8598	11.9252	NA
AIVVSGGSSMR	Clostridium	Genus	Bacteria		Firmicutes	Clostridia	Clostridiales	Clostridiaceae	Clostridium		11.4857	NA	NA	NA	12.9782	NA	12.9822	NA	13.4606	NA	11.9414	11.8872	12.7455	13.1617	15.1611	12.4859	NA	12.6057	12.2869	13.1241	12.1359	12.9008	12.5202	NA
AIVWCQAIPGTSAAIDK	Anaerotruncus sp. G3(2012)	Species	Bacteria		Firmicutes	Clostridia	Clostridiales	Ruminococcaceae	Anaerotruncus	Anaerotruncus sp. G3(2012)	12.8281	13.4685	12.2237	14.3962	13.5305	12.2649	13.6068	14.507	13.6494	14.5581	11.9537	12.3212	11.7551	13.9345	11.524	13.5354	14.6982	13.637	14.0767	13.0396	13.7728	14.9792	14.7128	15.4133
AIVWGMQTR	Metazoa	Kingdom	Eukaryota	Metazoa							NA	12.8943	11.6834	11.6049	NA	12.802	NA	NA	NA	NA	11.0727	NA	NA	NA	10.7531	NA	NA	NA	12.4438	NA	NA	NA	NA	12.344
AIWNVINWENVTER	Chordata	Phylum	Eukaryota	Metazoa	Chordata						10.2531	12.8669	13.354	13.4894	13.3304	15.1917	12.3233	14.1493	12.5494	12.4085	NA	13.0296	13.5026	13.5517	11.8428	12.4542	14.4305	13.2263	13.2052	NA	12.7559	13.7882	13.8045	12.3703
AIYDNIEFIGEDK	Lachnospiraceae bacterium MD335	Species	Bacteria		Firmicutes	Clostridia	Clostridiales	Lachnospiraceae		Lachnospiraceae bacterium MD335	NA	NA	11.8274	NA	11.4798	NA	NA	10.7879	11.1636	NA	NA	11.4035	11.4185	12.0918	10.6334	12.083	12.1926	NA	11.5707	11.082	11.8088	11.118	11.7998	NA
AIYEAVLR	Chordata	Phylum	Eukaryota	Metazoa	Chordata						17.6167	NA	19.4446	NA	17.8475	18.0591	16.6655	17.7537	18.394	18.6523	16.6533	18.0107	17.2972	17.6586	15.8251	18.2802	NA	18.3199	17.5244	17.942	18.607	18.9857	18.4072	17.1193
AIYLNMPTEALYEEAIK	Mucispirillum schaedleri	Species	Bacteria		Deferribacteres	Deferribacteres	Deferribacterales	Deferribacteraceae	Mucispirillum	Mucispirillum schaedleri	NA	NA	NA	NA	10.2716	10.3277	NA	NA	NA	NA	NA	NA	11.862	10.2906	11.5113	NA	NA	NA	NA	NA	NA	NA	10.1563	12.2176
AIYQATYR	Chordata	Phylum	Eukaryota	Metazoa	Chordata						NA	NA	NA	NA	NA	NA	NA	NA	12.4965	NA	NA	NA	NA	NA	NA	NA	12.9071	NA	NA	NA	NA	NA	13.5013	NA
AIYQVYNALQEK	Chordata	Phylum	Eukaryota	Metazoa	Chordata						NA	9.17198	NA	NA	NA	NA	NA	NA	NA	NA	NA	NA	NA	NA	NA	NA	NA	NA	NA	NA	NA	NA	NA	NA
AIYTPGAAFLNVMSPCPR	Coprococcus	Genus	Bacteria		Firmicutes	Clostridia	Clostridiales	Lachnospiraceae	Coprococcus		NA	NA	NA	NA	NA	10.1036	10.2475	NA	NA	NA	NA	NA	10.3131	10.0508	NA	NA	10.4314	NA	NA	10.3199	NA	NA	10.6835	NA
AIYVQQLR	Bacteria	Superkingdom	Bacteria								13.289	14.0821	14.4397	14.4001	13.5135	13.1898	NA	NA	NA	NA	13.5255	NA	NA	13.0335	14.0899	NA	NA	NA	15.1682	13.1459	NA	NA	NA	14.8671
AKDINQEVYNFLATAGAK	Chordata	Phylum	Eukaryota	Metazoa	Chordata						NA	NA	NA	NA	NA	13.5514	NA	11.5362	NA	NA	NA	NA	11.1706	NA	11.6768	NA	11.2133	10.7342	11.6957	NA	NA	NA	11.3375	11.6578
AKDITLQPCENEGQIASVYGK	Lachnospiraceae bacterium A2	Species	Bacteria		Firmicutes	Clostridia	Clostridiales	Lachnospiraceae		Lachnospiraceae bacterium A2	NA	NA	NA	NA	NA	NA	NA	12.1714	NA	NA	NA	NA	NA	NA	NA	NA	NA	NA	NA	NA	NA	NA	NA	NA
AKDLALMK	Lachnospiraceae bacterium A4	Species	Bacteria		Firmicutes	Clostridia	Clostridiales	Lachnospiraceae		Lachnospiraceae bacterium A4	NA	NA	NA	NA	NA	NA	NA	NA	NA	NA	NA	13.34	NA	NA	NA	NA	NA	NA	NA	NA	NA	NA	12.2067	NA
AKEAQDDLVK	Metazoa	Kingdom	Eukaryota	Metazoa							12.564	14.7051	13.4415	14.452	NA	14.1896	NA	NA	NA	10.4243	NA	NA	12.951	12.2408	12.6287	11.5538	NA	12.0332	13.8745	12.5879	12.8936	NA	NA	14.3345
AKEEGSWK	Mammalia	Class	Eukaryota	Metazoa	Chordata	Mammalia					13.2383	NA	NA	12.9747	NA	14.646	NA	NA	NA	NA	13.3417	NA	NA	NA	NA	NA	NA	13.2053	NA	13.2992	NA	NA	NA	14.3121
AKEFVEAVAAAR	Clostridiales	Order	Bacteria		Firmicutes	Clostridia	Clostridiales				NA	NA	NA	NA	NA	NA	NA	11.6569	NA	NA	NA	9.90758	NA	NA	NA	NA	NA	NA	NA	NA	NA	NA	NA	NA
AKELAAPLNTDVTAVLIGSDVK	Roseburia	Genus	Bacteria		Firmicutes	Clostridia	Clostridiales	Lachnospiraceae	Roseburia		NA	NA	NA	NA	NA	NA	NA	NA	NA	NA	NA	NA	NA	NA	12.5124	NA	10.3407	NA	NA	NA	NA	NA	NA	NA
AKELFALNEETAK	Clostridiales	Order	Bacteria		Firmicutes	Clostridia	Clostridiales				NA	NA	NA	NA	NA	13.5896	NA	NA	10.956	NA	NA	10.8246	14.1088	NA	NA	NA	NA	NA	13.1239	NA	NA	NA	13.2607	13.8177
AKELIFSGK	Clostridiales	Order	Bacteria		Firmicutes	Clostridia	Clostridiales				NA	NA	NA	NA	NA	NA	NA	NA	NA	NA	NA	NA	NA	NA	12.32	NA	NA	12.2376	13.0694	12.0513	NA	NA	NA	NA
AKELIFTCDNIDAAEAYR	Clostridiales	Order	Bacteria		Firmicutes	Clostridia	Clostridiales				NA	NA	NA	NA	NA	NA	NA	13.3889	NA	NA	NA	NA	NA	NA	NA	NA	NA	NA	NA	NA	NA	NA	NA	NA
AKELLAEAGYPDGFSCK	Clostridiales	Order	Bacteria		Firmicutes	Clostridia	Clostridiales				NA	NA	NA	NA	NA	NA	NA	11.9033	NA	NA	NA	NA	NA	NA	NA	NA	NA	NA	NA	NA	NA	NA	NA	NA
AKELLAYYQAK	Clostridium sp. MD294	Species	Bacteria		Firmicutes	Clostridia	Clostridiales	Clostridiaceae	Clostridium	Clostridium sp. MD294	NA	NA	NA	NA	NA	11.0302	11.199	11.1345	NA	9.84168	NA	NA	NA	NA	NA	NA	NA	NA	10.246	NA	11.0302	NA	NA	11.5762
AKEMIFTCDNIDANEAYR	Roseburia	Genus	Bacteria		Firmicutes	Clostridia	Clostridiales	Lachnospiraceae	Roseburia		NA	NA	NA	NA	NA	NA	11.0997	NA	NA	NA	NA	NA	11.2394	NA	NA	NA	NA	NA	NA	NA	NA	NA	10.734	NA
AKENFETAIK	Firmicutes	Phylum	Bacteria		Firmicutes						15.5454	14.4118	16.0131	15.1279	15.5266	14.6043	16.0819	NA	15.2173	13.9609	15.0579	NA	16.0309	15.6977	16.834	16.334	12.8699	NA	13.8439	NA	13.7593	13.2708	16.4121	13.6655
AKENFETAIR	Clostridiales bacterium CHKCI001	Species	Bacteria		Firmicutes	Clostridia	Clostridiales			Clostridiales bacterium CHKCI001	NA	NA	NA	NA	NA	NA	NA	NA	NA	NA	NA	15.8407	NA	NA	NA	NA	NA	NA	NA	NA	NA	NA	NA	NA
AKEVAPLAEK	Ruminococcaceae	Family	Bacteria		Firmicutes	Clostridia	Clostridiales	Ruminococcaceae			NA	NA	NA	12.306	12.4945	NA	NA	12.8407	12.1567	NA	NA	11.8596	NA	NA	NA	12.3783	NA	NA	NA	10.3561	NA	NA	13.2562	16.5147
AKEVAPVAEK	Clostridiales	Order	Bacteria		Firmicutes	Clostridia	Clostridiales				13.7974	12.6412	11.9911	NA	13.2529	14.0883	14.1113	NA	NA	NA	14.5434	NA	NA	13.4261	14.6362	11.2843	NA	13.8387	13.1971	13.0218	NA	12.8015	NA	14.3905
AKFDELTR	Bacteria	Superkingdom	Bacteria								NA	NA	NA	NA	NA	NA	NA	NA	14.8325	NA	NA	14.011	15.3663	NA	NA	NA	NA	NA	NA	NA	14.9582	NA	16.089	15.7959
AKGEASISTATADK	Lachnospiraceae bacterium A4	Species	Bacteria		Firmicutes	Clostridia	Clostridiales	Lachnospiraceae		Lachnospiraceae bacterium A4	NA	NA	NA	NA	NA	12.1229	11.4816	NA	NA	NA	NA	NA	NA	11.4816	NA	NA	12.2724	13.4341	NA	NA	NA	11.841	13.6054	NA
AKGETAYLPCK	Mammalia	Class	Eukaryota	Metazoa	Chordata	Mammalia					NA	NA	NA	NA	NA	NA	NA	NA	NA	NA	NA	NA	12.8437	NA	NA	NA	NA	NA	12.3875	NA	NA	NA	12.7462	11.802
AKGGECAVGYLMQK	Lachnospiraceae	Family	Bacteria		Firmicutes	Clostridia	Clostridiales	Lachnospiraceae			NA	NA	NA	NA	NA	NA	NA	10.7884	NA	NA	NA	NA	NA	NA	NA	NA	NA	NA	NA	NA	NA	NA	NA	NA
AKIDYNLMK	Lachnospiraceae bacterium TWA4	Species	Bacteria		Firmicutes	Clostridia	Clostridiales	Lachnospiraceae		Lachnospiraceae bacterium TWA4	NA	NA	NA	NA	NA	13.2205	13.2945	12.8432	13.1112	NA	NA	13.3129	NA	NA	13.2205	NA	NA	12.6816	NA	13.533	12.4402	NA	14.5392	13.8268
AKLEAEGAEVNLK	Firmicutes	Phylum	Bacteria		Firmicutes						NA	NA	NA	NA	NA	NA	NA	13.6164	NA	NA	NA	11.3438	NA	NA	NA	NA	NA	NA	NA	NA	NA	NA	NA	NA
AKLEAEGAK	Bacteria	Superkingdom	Bacteria								NA	14.3945	NA	NA	15.7119	NA	NA	NA	NA	NA	NA	NA	NA	15.5847	16.9733	15.3734	15.0808	NA	NA	NA	NA	NA	NA	NA
AKLPNEEK	Bacteroidales	Order	Bacteria		Bacteroidetes	Bacteroidia	Bacteroidales				13.0228	13.0125	NA	14.9385	NA	13.0427	12.1837	NA	NA	NA	13.7783	NA	NA	13.9944	NA	12.6345	NA	NA	15.3088	13.2329	NA	NA	NA	15.5441
AKMPCLITALAELNEPR	Clostridiales	Order	Bacteria		Firmicutes	Clostridia	Clostridiales				NA	NA	NA	NA	NA	11.3663	NA	NA	NA	NA	NA	NA	11.7432	10.4706	NA	NA	NA	NA	NA	NA	NA	NA	NA	NA
AKMPCLITALSELNEPR	Clostridiales	Order	Bacteria		Firmicutes	Clostridia	Clostridiales				NA	NA	NA	NA	NA	11.602	NA	11.9786	NA	NA	NA	NA	11.0506	NA	NA	NA	NA	NA	NA	NA	NA	NA	NA	NA
AKMPCLVTALSELNEPR	Clostridiales	Order	Bacteria		Firmicutes	Clostridia	Clostridiales				NA	NA	NA	NA	NA	NA	NA	NA	NA	NA	NA	NA	12.6746	NA	11.5046	NA	9.85315	NA	12.5482	NA	NA	NA	NA	11.3713
AKNENVLGSANR	Mucispirillum schaedleri	Species	Bacteria		Deferribacteres	Deferribacteres	Deferribacterales	Deferribacteraceae	Mucispirillum	Mucispirillum schaedleri	NA	NA	NA	NA	NA	NA	NA	NA	NA	NA	NA	NA	NA	10.0552	NA	NA	NA	11.4838	NA	NA	NA	NA	NA	11.6143
AKNYLESVK	Roseburia	Genus	Bacteria		Firmicutes	Clostridia	Clostridiales	Lachnospiraceae	Roseburia		NA	NA	NA	NA	NA	NA	NA	12.6194	NA	NA	NA	14.8418	NA	NA	NA	NA	NA	NA	NA	NA	NA	NA	12.6403	NA
AKQNFETAVR	Lachnospiraceae bacterium A4	Species	Bacteria		Firmicutes	Clostridia	Clostridiales	Lachnospiraceae		Lachnospiraceae bacterium A4	NA	NA	NA	NA	NA	12.5044	13.6065	NA	NA	12.4117	NA	NA	NA	NA	NA	NA	NA	12.2752	NA	NA	NA	NA	NA	NA
AKQPEIK	Clostridium	Genus	Bacteria		Firmicutes	Clostridia	Clostridiales	Clostridiaceae	Clostridium		NA	NA	NA	NA	NA	NA	NA	NA	NA	NA	NA	NA	NA	NA	12.7524	NA	NA	NA	NA	NA	NA	NA	NA	NA
AKTFDEAIAK	Bacteria	Superkingdom	Bacteria								NA	NA	NA	NA	NA	12.5485	13.1833	NA	NA	NA	NA	NA	NA	NA	NA	NA	NA	NA	11.9221	11.9605	NA	12.3591	NA	12.3826
AKTNADTDGMVK	Chordata	Phylum	Eukaryota	Metazoa	Chordata						NA	NA	NA	NA	NA	9.37685	NA	NA	NA	NA	NA	NA	NA	NA	NA	NA	NA	NA	9.5438	9.77721	NA	NA	NA	10.9011
AKVENEVDR	Mammalia	Class	Eukaryota	Metazoa	Chordata	Mammalia					NA	12.7942	NA	12.5369	NA	NA	NA	NA	NA	12.5369	NA	NA	NA	NA	NA	NA	NA	NA	NA	NA	NA	NA	NA	NA
AKYPDACTYNVETDNSIK	Mucispirillum schaedleri	Species	Bacteria		Deferribacteres	Deferribacteres	Deferribacterales	Deferribacteraceae	Mucispirillum	Mucispirillum schaedleri	NA	NA	NA	NA	NA	11.1423	NA	12.7371	NA	NA	NA	11.9687	NA	NA	NA	NA	NA	11.4674	10.2781	NA	11.0878	NA	12.123	12.8772
ALAAAGYDVEK	Metazoa	Kingdom	Eukaryota	Metazoa							14.9979	17.2655	16.9004	16.4658	13.0915	16.0037	11.3317	13.3583	NA	11.3393	11.7062	NA	NA	13.0622	14.4642	11.1901	13.1282	14.0891	14.7566	13.4903	NA	11.6961	NA	14.0139
ALAAAGYDVEKNNSR	Metazoa	Kingdom	Eukaryota	Metazoa							11.6921	11.6816	NA	NA	NA	12.8448	NA	NA	NA	NA	NA	NA	NA	NA	NA	NA	NA	10.8133	12.1168	NA	NA	NA	NA	11.4192
ALAADNADVK	Clostridium sp. MD294	Species	Bacteria		Firmicutes	Clostridia	Clostridiales	Clostridiaceae	Clostridium	Clostridium sp. MD294	NA	13.2981	13.6359	13.3182	13.3882	15.3465	NA	NA	13.8726	14.5669	NA	NA	NA	13.5893	NA	14.0978	13.4757	13.8351	NA	NA	13.6799	13.6318	NA	NA
ALAAGGVGSIVR	Chordata	Phylum	Eukaryota	Metazoa	Chordata						NA	NA	NA	NA	NA	NA	NA	NA	NA	NA	NA	NA	12.033	NA	NA	NA	NA	NA	NA	NA	NA	NA	NA	NA
ALAAGGYDVEK	Chordata	Phylum	Eukaryota	Metazoa	Chordata						12.654	15.4862	14.6127	14.4046	NA	14.0109	NA	NA	NA	NA	9.61339	NA	NA	11.0161	11.7881	NA	11.0373	12.3418	12.7793	NA	NA	10.1884	11.8778	11.7469
ALAAGITEVVFDR	Bacteria	Superkingdom	Bacteria								NA	15.3017	NA	NA	13.6683	NA	NA	NA	NA	10.5085	14.9798	NA	NA	14.1485	NA	13.7311	NA	NA	NA	NA	NA	NA	NA	14.6137
ALAAQNIVEDMEQR	Mammalia	Class	Eukaryota	Metazoa	Chordata	Mammalia					10.7218	11.6668	10.357	10.8799	NA	11.7913	NA	NA	NA	NA	NA	NA	NA	NA	NA	NA	NA	NA	NA	NA	NA	NA	NA	10.8923
ALAASPGAACGK	Clostridiales	Order	Bacteria		Firmicutes	Clostridia	Clostridiales				15.6117	15.2314	14.4414	15.4279	17.1495	16.2717	17.7826	NA	17.4844	14.9059	16.4356	15.5321	17.0025	17.2826	15.219	15.5182	16.8565	16.7455	16.9422	16.342	15.7127	16.3079	14.3226	16.0839
ALADAGSTSSVTVSGK	Clostridium sp. MD294	Species	Bacteria		Firmicutes	Clostridia	Clostridiales	Clostridiaceae	Clostridium	Clostridium sp. MD294	13.0252	11.5534	13.1148	11.114	9.81357	12.34	NA	14.2757	11.0499	9.93406	12.801	11.6423	NA	10.2043	NA	NA	10.0381	11.6042	13.0613	11.6381	NA	NA	NA	NA
ALADLTAAAK	Mucispirillum schaedleri	Species	Bacteria		Deferribacteres	Deferribacteres	Deferribacterales	Deferribacteraceae	Mucispirillum	Mucispirillum schaedleri	NA	NA	NA	NA	NA	NA	NA	NA	NA	NA	NA	NA	NA	12.4871	NA	NA	NA	NA	NA	NA	NA	NA	NA	NA
ALADTDATTIIGGGDSAAAVNQLGFGDK	Clostridiales	Order	Bacteria		Firmicutes	Clostridia	Clostridiales				NA	NA	NA	NA	12.0466	12.8095	14.3303	12.8661	NA	NA	NA	NA	NA	12.8603	NA	12.7531	NA	NA	NA	NA	13.1239	NA	NA	12.918
ALADTEATTIIGGGDSAAAVNQLGYGDK	Dorea sp. 5-2	Species	Bacteria		Firmicutes	Clostridia	Clostridiales	Lachnospiraceae	Dorea	Dorea sp. 5-2	NA	NA	NA	NA	11.275	13.0529	13.0999	13.0543	11.9193	NA	11.7302	11.686	12.1016	11.6192	11.922	NA	11.9396	12.0457	12.3152	NA	11.2961	NA	NA	11.9674
ALAEAEAYPGPSLIIAYAPCINHGIK	Firmicutes	Phylum	Bacteria		Firmicutes						NA	NA	NA	NA	NA	13.2836	NA	12.3488	NA	NA	NA	NA	12.5476	10.9472	NA	NA	11.1494	NA	NA	NA	NA	NA	NA	NA
ALAEAGVSVFR	Desulfovibrio	Genus	Bacteria		Proteobacteria	Deltaproteobacteria	Desulfovibrionales	Desulfovibrionaceae	Desulfovibrio		12.2772	NA	NA	NA	NA	NA	NA	12.1142	NA	NA	12.1327	NA	12.7735	12.564	NA	NA	NA	NA	NA	NA	NA	NA	NA	NA
ALAEEGTEITLTATPDNR	Lachnospiraceae bacterium MD335	Species	Bacteria		Firmicutes	Clostridia	Clostridiales	Lachnospiraceae		Lachnospiraceae bacterium MD335	NA	NA	10.2695	NA	10.247	NA	NA	NA	NA	9.39966	NA	NA	10.8095	10.7888	NA	NA	12.231	NA	11.2611	NA	10.7636	NA	NA	NA
ALAEEVEVQDGPNDDGEMFMRPGK	Mus musculus	Species	Eukaryota	Metazoa	Chordata	Mammalia	Rodentia	Muridae	Mus	Mus musculus	NA	NA	NA	NA	NA	10.9432	NA	NA	NA	NA	NA	NA	10.4895	NA	NA	NA	NA	NA	NA	NA	NA	NA	NA	9.96485
ALAEGVLLR	Mammalia	Class	Eukaryota	Metazoa	Chordata	Mammalia					11.9426	13.116	12.2253	11.6619	NA	13.2719	NA	NA	NA	NA	NA	NA	11.3941	NA	NA	NA	NA	11.2524	12.5979	11.2311	NA	NA	11.3313	11.7809
ALAEQFQEK	Lachnospiraceae bacterium A4	Species	Bacteria		Firmicutes	Clostridia	Clostridiales	Lachnospiraceae		Lachnospiraceae bacterium A4	13.4872	NA	13.8038	13.2227	16.0133	15.2855	15.7033	14.1222	14.4125	14.6432	NA	NA	NA	15.9078	12.4638	14.0339	15.7499	14.9369	NA	13.9098	NA	15.3451	14.5654	NA
ALAETDATTIIGGGDSAAAVNQLGFADK	Clostridiales	Order	Bacteria		Firmicutes	Clostridia	Clostridiales				NA	NA	NA	NA	NA	NA	NA	12.9656	NA	NA	12.798	NA	12.5268	NA	12.9863	11.5427	12.8805	NA	14.0846	NA	11.8405	NA	13.5598	12.0493
ALAETDATTIIGGGDSAAAVNQLGFGDK	Clostridiales	Order	Bacteria		Firmicutes	Clostridia	Clostridiales				NA	NA	NA	11.4581	12.7789	12.8357	NA	NA	NA	NA	12.1491	NA	12.7132	13.0268	13.4984	NA	12.9146	NA	13.8424	NA	NA	NA	12.858	13.0996
ALAETDATTIIGGGDSAAAVNTLGFGDK	Clostridiales	Order	Bacteria		Firmicutes	Clostridia	Clostridiales				NA	NA	NA	NA	12.4041	13.6234	NA	12.064	NA	NA	NA	NA	11.5231	12.2913	11.3615	11.2864	11.588	NA	12.2913	NA	NA	NA	12.4922	14.086
ALAETEATTIIGGGDSAAAVNQLGFADK	Lachnospiraceae bacterium A4	Species	Bacteria		Firmicutes	Clostridia	Clostridiales	Lachnospiraceae		Lachnospiraceae bacterium A4	13.7019	10.5297	11.2514	10.1	14.3289	13.9534	15.4596	12.2537	12.5542	11.696	13.9123	14.2301	13.5078	14.4316	14.0964	12.0985	13.08	12.3019	14.2381	14.5203	12.289	12.3197	13.9307	11.5811
ALAEYLFDDENMMTR	Bacteroidales	Order	Bacteria		Bacteroidetes	Bacteroidia	Bacteroidales				12.2977	13.1399	12.4423	13.0079	11.3951	9.74399	NA	NA	NA	NA	NA	NA	NA	11.1654	11.7351	NA	9.62642	NA	12.0668	NA	NA	NA	NA	10.7482
ALAEYLFDDETMMTR	Bacteria	Superkingdom	Bacteria								10.2572	11.9352	10.3889	10.7172	NA	9.73291	NA	NA	NA	NA	NA	NA	NA	NA	11.3831	NA	9.58181	NA	12.152	NA	NA	NA	NA	10.5098
ALAGCDFLTISPK	Eukaryota	Superkingdom	Eukaryota								10.1011	12.3834	9.90016	12.1377	10.693	11.8446	NA	10.3386	NA	NA	10.2945	10.1766	10.7424	10.8678	NA	NA	10.2716	10.7098	11.1149	10.1528	NA	NA	12.0516	11.1999
ALAGNLEK	Actinobacteria bacterium IMCC26256	Species	Bacteria		Actinobacteria	Actinobacteria				Actinobacteria bacterium IMCC26256	NA	NA	NA	NA	NA	NA	NA	NA	NA	NA	NA	NA	15.0673	14.7619	16.3359	16.4017	NA	NA	NA	NA	NA	NA	16.2313	NA
ALAIYESQLGPDNPNVAR	Rodentia	Order	Eukaryota	Metazoa	Chordata	Mammalia	Rodentia				NA	11.4361	NA	10.3315	NA	NA	NA	NA	NA	NA	NA	NA	NA	NA	NA	NA	NA	NA	NA	NA	NA	NA	NA	NA
ALALLEDEEQAVR	Muridae	Family	Eukaryota	Metazoa	Chordata	Mammalia	Rodentia	Muridae			NA	NA	NA	10.7961	NA	10.7521	NA	NA	NA	NA	NA	NA	NA	NA	NA	NA	NA	NA	NA	NA	NA	NA	NA	NA
ALALPIQDK	Clostridium	Genus	Bacteria		Firmicutes	Clostridia	Clostridiales	Clostridiaceae	Clostridium		12.7995	13.5724	13.4639	15.2708	15.2126	15.0991	14.985	13.8016	14.374	14.1869	13.8015	14.4255	14.6395	15.4798	14.1215	14.1635	14.2916	16.0358	14.7623	14.6836	13.5674	14.7296	13.5995	14.1525
ALAMENMEANAGQQK	Blautia hydrogenotrophica	Species	Bacteria		Firmicutes	Clostridia	Clostridiales	Lachnospiraceae	Blautia	Blautia hydrogenotrophica	11.2256	NA	NA	NA	11.9378	NA	12.5906	12.2527	10.4441	NA	11.6463	13.0691	11.4342	11.6643	13.0456	NA	11.0703	11.763	11.1298	12.2356	11.5322	NA	10.4546	12.2663
ALAMNLYNAEFTNAEHTEWTMNSEAGVK	Lachnospiraceae bacterium 28-4	Species	Bacteria		Firmicutes	Clostridia	Clostridiales	Lachnospiraceae		Lachnospiraceae bacterium 28-4	NA	NA	NA	NA	NA	10.5294	NA	NA	NA	NA	NA	NA	NA	NA	NA	NA	9.82134	NA	NA	NA	NA	NA	NA	NA
ALANSLACQGK	Metazoa	Kingdom	Eukaryota	Metazoa							13.7475	16.0672	15.1048	15.0667	12.7669	15.0862	NA	NA	NA	NA	12.8138	NA	13.4876	12.3223	NA	11.4593	11.8201	13.0355	13.9036	12.4794	11.9942	11.5641	13.583	13.5353
ALANVATVLAR	Rodentia	Order	Eukaryota	Metazoa	Chordata	Mammalia	Rodentia				NA	NA	NA	NA	15.2677	14.9054	13.2667	14.5721	14.6631	NA	NA	14.3533	14.4134	14.9773	15.1561	15.1598	NA	14.9251	14.1242	NA	14.8503	15.7078	15.6364	13.7383
ALAPEYAK	Metazoa	Kingdom	Eukaryota	Metazoa							13.9306	16.1656	16.0011	15.7322	13.6471	14.7332	11.6482	12.9595	14.0902	12.7853	13.6512	13.7501	NA	NA	14.1586	13.6696	13.6165	13.7815	13.734	12.8777	NA	13.5567	13.6162	14.3023
ALAPTWEQLALGLEHSETVK	Metazoa	Kingdom	Eukaryota	Metazoa							NA	NA	NA	NA	NA	12.4418	NA	NA	NA	NA	NA	NA	10.8835	NA	10.9842	NA	NA	NA	NA	NA	NA	NA	NA	NA
ALASLMTYK	Metazoa	Kingdom	Eukaryota	Metazoa							12.3382	12.7963	12.2928	12.8019	NA	13.8986	10.0932	NA	11.4521	10.712	11.4461	NA	12.1099	11.143	12.198	10.3374	NA	12.276	12.1612	11.9543	NA	NA	12.4042	12.7041
ALASQLQDSLK	Mammalia	Class	Eukaryota	Metazoa	Chordata	Mammalia					NA	NA	NA	NA	NA	12.4179	NA	NA	NA	NA	NA	NA	10.4528	NA	NA	NA	NA	NA	11.7055	10.3634	NA	NA	NA	11.5643
ALASSYAGR	Clostridiales	Order	Bacteria		Firmicutes	Clostridia	Clostridiales				17.6973	15.8886	16.2956	15.8848	17.9425	17.4699	18.2775	NA	17.4317	15.9551	17.7118	NA	NA	18.0388	18.2944	17.0111	16.8144	17.3154	18.2814	17.8198	NA	16.0113	NA	16.6086
ALASSYAGRK	Clostridiales	Order	Bacteria		Firmicutes	Clostridia	Clostridiales				12.163	NA	NA	NA	NA	11.6495	12.8955	NA	NA	NA	11.1619	NA	NA	NA	11.8319	NA	NA	11.1136	11.5203	12.0336	NA	NA	NA	NA
ALATAYSGR	Lachnospiraceae bacterium A2	Species	Bacteria		Firmicutes	Clostridia	Clostridiales	Lachnospiraceae		Lachnospiraceae bacterium A2	NA	NA	14.853	NA	14.5222	14.7985	15.3953	NA	12.6553	NA	NA	NA	NA	14.5813	NA	16.6131	11.4782	14.0246	13.8016	13.9994	12.908	NA	13.8728	NA
ALATQLPVIPR	Rodentia	Order	Eukaryota	Metazoa	Chordata	Mammalia	Rodentia				NA	10.7788	9.94112	NA	NA	NA	NA	NA	NA	NA	NA	NA	NA	NA	NA	NA	NA	NA	NA	NA	NA	NA	9.63129	NA
ALAVATAVK	Alistipes	Genus	Bacteria		Bacteroidetes	Bacteroidia	Bacteroidales	Rikenellaceae	Alistipes		NA	13.9231	NA	14.376	NA	13.2691	NA	12.4343	NA	NA	12.9537	NA	13.5623	NA	NA	NA	NA	NA	13.2282	12.8353	13.2706	NA	12.8686	NA
ALAVGGLGSIIR	Chordata	Phylum	Eukaryota	Metazoa	Chordata						NA	NA	NA	NA	NA	10.0626	NA	NA	NA	NA	NA	NA	NA	NA	NA	NA	NA	9.11026	NA	NA	NA	NA	NA	9.3833
ALAVSDLNR	Mammalia	Class	Eukaryota	Metazoa	Chordata	Mammalia					14.0949	15.2641	15.1331	14.3414	12.9141	15.0332	12.3122	NA	NA	11.9744	13.3293	13.0491	13.3375	12.8822	13.4339	12.5952	NA	14.007	13.9045	13.5753	NA	NA	14.0431	14.0284
ALAYALAIGGAR	Clostridiales	Order	Bacteria		Firmicutes	Clostridia	Clostridiales				NA	11.3719	NA	NA	12.9356	11.8438	12.801	NA	13.5139	NA	NA	12.2226	NA	12.5589	12.803	NA	12.3543	12.5939	NA	12.2821	13.6119	12.2574	12.9238	11.7802
ALCADLSPR	Mammalia	Class	Eukaryota	Metazoa	Chordata	Mammalia					NA	12.2778	NA	12.6704	10.9291	NA	NA	NA	12.7266	NA	10.3989	NA	NA	NA	NA	NA	11.9403	10.803	NA	11.2819	NA	11.9158	12.79	12.1193
ALCDYKQDQK	Chordata	Phylum	Eukaryota	Metazoa	Chordata						NA	NA	NA	NA	NA	NA	NA	NA	NA	NA	NA	NA	NA	NA	NA	NA	NA	NA	NA	NA	NA	NA	NA	9.59416
ALCLFEMPTGVPLR	Mammalia	Class	Eukaryota	Metazoa	Chordata	Mammalia					12.4566	13.0368	13.7207	13.8526	12.5209	11.9068	11.6672	11.9099	12.9127	12.5046	NA	12.3142	12.3898	12.1493	NA	11.8895	12.7007	NA	12.1411	11.8647	12.6489	12.6189	13.5377	12.2783
ALCLFEMPTGVPLRR	Mammalia	Class	Eukaryota	Metazoa	Chordata	Mammalia					NA	NA	NA	12.5173	12.4025	12.4446	NA	12.3012	NA	10.7956	NA	9.96668	12.7951	11.9038	11.5145	NA	13.2462	10.6694	11.9615	10.9231	10.9028	12.6455	11.4087	11.6116
ALCSEFQGSVATPR	Mus musculus	Species	Eukaryota	Metazoa	Chordata	Mammalia	Rodentia	Muridae	Mus	Mus musculus	NA	11.2981	NA	11.1922	NA	NA	NA	NA	NA	NA	10.0722	NA	NA	NA	NA	NA	11.1379	NA	11.1509	11.493	NA	9.96804	13.1738	NA
ALCYSELLK	Alistipes	Genus	Bacteria		Bacteroidetes	Bacteroidia	Bacteroidales	Rikenellaceae	Alistipes		11.6729	12.8159	11.118	13.2858	11.5001	13.0655	11.6799	12.488	NA	12.6443	NA	11.7511	11.4022	NA	NA	NA	11.6279	11.6205	NA	11.3856	12.0688	NA	11.5325	11.67
ALDDVNLK	Bacteria	Superkingdom	Bacteria								NA	12.2122	NA	NA	NA	NA	14.7397	NA	13.7154	NA	14.0018	12.8055	13.7943	14.1994	14.2102	13.311	NA	NA	13.6448	NA	11.475	NA	13.3547	NA
ALDEADIPHIK	Anaerotruncus sp. G3(2012)	Species	Bacteria		Firmicutes	Clostridia	Clostridiales	Ruminococcaceae	Anaerotruncus	Anaerotruncus sp. G3(2012)	NA	NA	NA	NA	NA	NA	NA	11.7702	NA	NA	NA	8.66926	NA	10.7423	NA	NA	NA	NA	11.4096	NA	9.71152	NA	12.196	12.5745
ALDEAIAFVK	Firmicutes	Phylum	Bacteria		Firmicutes						12.8444	13.7125	12.3048	14.1721	14.9032	14.6067	14.6219	NA	14.5588	12.4557	14.7202	13.2993	14.9628	14.7894	14.8704	14.872	14.9779	14.4952	14.5313	14.866	14.0249	14.2878	15.0614	14.7006
ALDEAVDKK	Clostridium sp. MD294	Species	Bacteria		Firmicutes	Clostridia	Clostridiales	Clostridiaceae	Clostridium	Clostridium sp. MD294	NA	NA	NA	NA	NA	NA	NA	NA	12.6267	NA	NA	NA	NA	11.3518	NA	NA	NA	NA	NA	NA	NA	NA	NA	NA
ALDEAYKK	Absidia glauca	Species	Eukaryota	Fungi	Mucoromycota	Mucoromycetes	Mucorales	Cunninghamellaceae	Absidia	Absidia glauca	NA	NA	NA	NA	NA	NA	NA	NA	NA	NA	NA	NA	NA	NA	12.5171	NA	NA	NA	NA	NA	NA	NA	NA	NA
ALDEEVHK	Chordata	Phylum	Eukaryota	Metazoa	Chordata						NA	NA	13.2759	NA	NA	NA	NA	NA	NA	NA	NA	NA	NA	NA	NA	NA	NA	NA	NA	NA	NA	NA	NA	NA
ALDEGDIALLK	Metazoa	Kingdom	Eukaryota	Metazoa							NA	12.3151	11.6698	11.8833	NA	NA	NA	NA	NA	NA	NA	NA	NA	NA	NA	NA	NA	NA	NA	NA	NA	NA	NA	NA
ALDEYYDK	Metazoa	Kingdom	Eukaryota	Metazoa							NA	11.4721	NA	NA	NA	NA	NA	NA	NA	NA	NA	NA	NA	NA	NA	NA	NA	NA	NA	NA	NA	NA	NA	NA
ALDFAVSEYNK	Mammalia	Class	Eukaryota	Metazoa	Chordata	Mammalia					11.242	12.9772	12.2081	13.6462	12.4866	13.2014	NA	NA	NA	NA	11.4996	NA	13.6259	NA	11.8504	NA	NA	NA	13.0038	11.9688	NA	NA	12.4726	13.0416
ALDFIASK	Metazoa	Kingdom	Eukaryota	Metazoa							13.8599	15.8285	15.224	15.4346	12.9507	14.395	11.725	15.4942	13.8661	13.4718	13.44	14.0757	12.4027	13.1244	14.1339	12.7524	13.9333	14.1819	13.427	13.6569	13.0843	13.6937	13.3177	13.8837
ALDFLLSDYQTIR	Lachnospiraceae	Family	Bacteria		Firmicutes	Clostridia	Clostridiales	Lachnospiraceae			12.9518	NA	NA	NA	14.0583	NA	14.5254	NA	11.3858	NA	12.1014	NA	NA	14.1254	14.649	12.1189	12.1284	11.5474	13.7883	NA	NA	11.3608	12.5021	NA
ALDIADIPWAGR	Bacteroides	Genus	Bacteria		Bacteroidetes	Bacteroidia	Bacteroidales	Bacteroidaceae	Bacteroides		13.8493	15.3314	15.0016	15.2478	13.7924	13.7296	12.5486	13.6993	13.5467	NA	14.8043	NA	14.1035	14.0389	15.6711	13.3905	13.1048	12.2347	14.4677	13.1202	13.1659	NA	14.5595	14.4616
ALDIAENEMPGLMR	Mammalia	Class	Eukaryota	Metazoa	Chordata	Mammalia					11.9828	14.6566	13.9365	14.6091	12.8041	13.5772	10.2863	13.0827	13.2852	11.1937	12.9584	12.8221	14.1439	12.9742	12.9513	12.4527	11.8865	12.9051	13.5608	13.6262	12.0423	12.2218	14.3137	13.959
ALDIAENEMPGLMRMR	Mammalia	Class	Eukaryota	Metazoa	Chordata	Mammalia					NA	NA	NA	NA	NA	NA	NA	13.4377	NA	NA	NA	NA	NA	NA	NA	NA	NA	NA	NA	NA	NA	NA	NA	NA
ALDIDFATR	Chordata	Phylum	Eukaryota	Metazoa	Chordata						11.5535	13.6126	12.1151	13.5812	NA	12.9391	NA	NA	NA	NA	11.3104	NA	13.0613	NA	12.6294	NA	NA	NA	11.9296	11.5003	NA	NA	12.9605	12.653
ALDLEHLLNR	Anaerotruncus sp. G3(2012)	Species	Bacteria		Firmicutes	Clostridia	Clostridiales	Ruminococcaceae	Anaerotruncus	Anaerotruncus sp. G3(2012)	NA	NA	NA	NA	NA	NA	NA	11.772	NA	NA	NA	NA	NA	NA	NA	NA	NA	NA	NA	NA	NA	NA	NA	NA
ALDLTRPVTFVSNAK	Mus musculus	Species	Eukaryota	Metazoa	Chordata	Mammalia	Rodentia	Muridae	Mus	Mus musculus	NA	NA	NA	NA	NA	NA	NA	13.4727	NA	NA	NA	12.2431	NA	NA	NA	NA	NA	NA	NA	NA	NA	NA	13.4089	NA
ALDMALAYALAIGGAR	Anaerostipes	Genus	Bacteria		Firmicutes	Clostridia	Clostridiales	Lachnospiraceae	Anaerostipes		NA	NA	NA	NA	NA	NA	NA	10.4388	NA	NA	NA	NA	NA	NA	9.24928	NA	10.61	NA	11.2618	NA	NA	NA	NA	NA
ALDMVYER	Lachnospiraceae bacterium A4	Species	Bacteria		Firmicutes	Clostridia	Clostridiales	Lachnospiraceae		Lachnospiraceae bacterium A4	NA	NA	12.1858	12.0504	15.2701	14.1906	14.7757	12.1292	14.9991	14.0916	NA	NA	NA	15.373	11.8848	13.3655	15.2813	14.6522	NA	11.2262	NA	15.3318	14.0081	NA
ALDNVTPQVEVK	Bacteria	Superkingdom	Bacteria								12.7159	15.5982	15.0057	15.8108	12.9871	14.9992	NA	NA	NA	12.0036	13.9625	NA	14.4992	13.1557	14.5827	12.4137	NA	NA	14.2373	14.6056	NA	NA	13.0844	16.4504
ALDSTWITGR	Alistipes inops	Species	Bacteria		Bacteroidetes	Bacteroidia	Bacteroidales	Rikenellaceae	Alistipes	Alistipes inops	NA	NA	NA	NA	NA	NA	NA	NA	13.0884	NA	13.4563	NA	14.5659	NA	NA	NA	NA	NA	13.2943	12.7167	NA	NA	13.0238	13.4037
ALDTMNFDVIK	Chordata	Phylum	Eukaryota	Metazoa	Chordata						NA	12.2723	11.4891	11.5463	NA	11.6261	NA	NA	NA	NA	NA	NA	NA	NA	NA	NA	NA	NA	NA	NA	NA	NA	NA	NA
ALDTVLFGPPLLTR	Chordata	Phylum	Eukaryota	Metazoa	Chordata						10.2416	13.0359	12.443	13.3168	10.9963	12.6594	NA	NA	11.5925	10.3615	10.3564	11.2585	12.262	10.9646	11.562	11.7293	10.424	11.7634	11.2744	11.7582	NA	NA	11.92	12.5483
ALDWLQK	Bacteria	Superkingdom	Bacteria								12.2059	12.9468	12.6018	13.1623	12.3288	11.5538	NA	NA	12.1866	NA	13.0792	11.5065	12.3928	12.2724	12.3744	NA	NA	NA	12.7178	12.1309	10.9424	NA	11.9081	11.7502
ALDYIASK	Metazoa	Kingdom	Eukaryota	Metazoa							12.8147	13.9586	14.3428	12.6294	NA	13.6098	12.1163	13.4956	12.9522	13.7278	13.5593	12.9804	NA	NA	12.4364	NA	13.7173	14.007	12.9224	13.381	14.641	13.4707	13.4633	12.4768
ALEAANADLEVK	Rodentia	Order	Eukaryota	Metazoa	Chordata	Mammalia	Rodentia				12.4444	13.1082	11.3523	10.6953	12.0442	13.1783	10.965	12.0071	9.15844	13.0083	11.2814	11.97	10.7409	11.9687	11.9154	11.8095	14.0883	12.8163	12.0034	11.2214	13.093	12.2515	10.1629	11.9848
ALEAGVNSLADTVK	Oscillibacter	Genus	Bacteria		Firmicutes	Clostridia	Clostridiales	Oscillospiraceae	Oscillibacter		NA	NA	NA	NA	9.6457	NA	11.0591	NA	NA	NA	10.6328	NA	11.8158	NA	11.209	NA	NA	10.3772	11.489	NA	NA	NA	10.8284	NA
ALEDDEDAK	Lactobacillus	Genus	Bacteria		Firmicutes	Bacilli	Lactobacillales	Lactobacillaceae	Lactobacillus		12.1791	12.9832	13.0822	12.5031	NA	NA	NA	NA	NA	11.132	NA	NA	NA	NA	NA	11.7055	12.3595	NA	NA	12.6291	NA	NA	NA	NA
ALEDPAGEWGDK	Eubacterium	Genus	Bacteria		Firmicutes	Clostridia	Clostridiales	Eubacteriaceae	Eubacterium		14.4798	NA	14.3839	15.3553	18.1865	17.8215	16.4882	15.3346	16.9855	16.2894	15.1823	15.8395	17.1665	18.2667	17.132	16.6145	16.5546	NA	17.4003	17.0845	13.1105	NA	15.5491	12.7568
ALEDPASEWGDK	Clostridiales	Order	Bacteria		Firmicutes	Clostridia	Clostridiales				NA	13.8979	12.1715	13.8839	12.1128	11.8319	12.7278	12.4371	13.8415	12.8136	13.1162	16.4614	17.0362	11.8828	13.176	16.2492	14.9126	13.0898	15.5907	16.3195	15.0289	13.534	11.3874	13.7836
ALEDPDSEWGDK	Firmicutes	Phylum	Bacteria		Firmicutes						11.6934	13.3895	12.0912	14.3549	15.2648	14.8486	16.4195	15.7844	13.8424	13.0591	13.1109	13.3938	15.3377	15.3399	15.8211	13.79	14.7221	15.468	12.9495	13.4769	12.9267	13.9366	13.6386	11.538
ALEDPKSEWGDK	Clostridiales	Order	Bacteria		Firmicutes	Clostridia	Clostridiales				NA	NA	NA	NA	NA	13.9445	NA	15.0436	14.316	NA	NA	11.1546	15.1198	NA	NA	NA	NA	NA	NA	NA	15.2663	NA	14.8186	16.2872
ALEDPMGEWGDK	Clostridiales	Order	Bacteria		Firmicutes	Clostridia	Clostridiales				NA	NA	NA	NA	15.7209	NA	12.3585	NA	12.5267	NA	NA	13.0675	12.2899	14.9388	NA	14.6017	NA	NA	12.8267	14.0241	12.6933	12.823	13.745	NA
ALEDPNGEWGDK	Clostridiales	Order	Bacteria		Firmicutes	Clostridia	Clostridiales				13.249	13.1992	13.9507	13.2681	17.0619	15.7521	16.1352	15.1355	16.1813	15.6162	15.3726	15.3323	16.1569	17.0175	16.214	15.8468	16.8787	16.7282	16.292	16.1903	16.4511	16.2992	15.8159	16.2001
ALEDPNSEWGDK	Clostridiales	Order	Bacteria		Firmicutes	Clostridia	Clostridiales				14.2728	NA	NA	NA	15.4703	15.9998	12.2799	16.4644	14.2283	11.3598	14.1216	14.612	15.7561	15.5097	NA	16.3922	NA	16.5452	15.6205	16.2636	14.7476	NA	13.1382	16.1402
ALEDPQSEWGDK	Bacteria	Superkingdom	Bacteria								13.1308	9.65671	11.2052	NA	13.5064	12.8669	14.4102	10.6707	11.5182	10.8929	13.561	13.8044	15.1022	13.598	13.124	11.6483	13.4081	12.7301	14.7108	13.8749	11.9279	10.2648	13.6755	NA
ALEDPSGEWGDK	Clostridiales	Order	Bacteria		Firmicutes	Clostridia	Clostridiales				15.7992	13.5608	15.2786	15.0586	17.6488	17.2161	18.0639	17.899	17.4994	16.2653	15.9679	17.0411	17.0216	17.8283	18.0707	16.7628	17.864	17.9355	16.9816	17.2247	16.7218	16.9	17.26	17.379
[truncated: 30,182 more rows]

## Sheet: Export List_Species
Species	Count
[Bacillus] sp. KCTC 13219	1
[Clostridium] cellulosi	1
[Clostridium] methylpentosum	2
[Clostridium] ultunense	1
[Eubacterium] brachy	1
[Eubacterium] rectale	4
[Eubacterium] siraeum	3
[Eubacterium] sulci	2
[truncated: 824 more rows]

## Sheet: Export List_Class
Class	Count
[truncated: 107 more rows]

## Sheet: Export List_Phylum
Phylum	Count
[truncated: 66 more rows]
