# Supplementary material for: Increasing taxonomic and functional characterization of host-microbiome interactions by DIA-PASEF metaproteomics
Source: Front Microbiol. 2023 Oct 16;14:1258703. doi: 10.3389/fmicb.2023.1258703 (PMC10613666; doi:10.3389/fmicb.2023.1258703)
Supplement: Supplementary file 16 [file Table_9.XLSX]

## Sheet: Taxon quantification_Class
SNI
	Taxon intensity								Test results
Class	SNI-259-14D	SNI-260-14D	SNI-509-14D	SNI-485-14D	SNI-259-Pre	SNI-260-Pre	SNI-509-Pre	SNI-485-Pre	P value	Mean of SNI-14D	Mean of SNI-Pre	Difference	SE of difference	t ratio	df	q value
Actinobacteria	28.2861	27.4584	27.0764	27.8437	25.5761	24.5946	24.7301	26.4225	0.005479	27.67	25.33	2.335	0.3235	7.22	3	0.046572
Alphaproteobacteria	28.8675	29.4196	26.7966	30.5067	29.0948	27.8802	27.4624	30.1828	0.646332	28.9	28.66	0.2426	0.4773	0.5082	3	0.646332
Bacilli	2153.72	2114.12	2157.16	1977.23	1949.53	2195.97	2079.22	1978.99	0.475265	2101	2051	49.63	60.98	0.814	3	0.504969
Bacteroidia	1719.65	1777.97	1649.57	1713.32	1589.76	1647.84	1502.82	1722.22	0.0715	1715	1616	99.46	36.34	2.737	3	0.160845
Chitinophagia	16.3831	15.8479	14.8556	15.7098	14.8793	13.583	14.2967	15.3391	0.075692	15.7	14.52	1.175	0.4399	2.67	3	0.160845
Clostridia	26958.2	27785.2	26249.7	27615.8	26505.7	26979.8	26046.7	27084.6	0.027738	27152	26654	498	124.1	4.015	3	0.119114
Coriobacteriia	16.7421	16.0382	15.7593	13.0244	16.7714	15.8334	14.8291	13.1455	0.377285	15.39	15.14	0.2462	0.2381	1.034	3	0.493372
Cytophagia	15.5671	15.4023	14.4255	14.7266	13.5631	12.5637	13.427	14.443	0.071899	15.03	13.5	1.531	0.5607	2.731	3	0.160845
Deferribacteres	734.875	702.254	729.107	739.085	790.003	738.098	734.482	800.107	0.05171	726.3	765.7	-39.34	12.53	3.139	3	0.160845
Deltaproteobacteria	179.573	193.276	165.84	193.237	174.902	180.141	165.873	184.922	0.101367	183	176.5	6.522	2.789	2.338	3	0.191472
Demospongiae	14.0297	14.6879	16.3372	15.3165	15.3436	14.7802	15.932	15.577	0.44732	15.09	15.41	-0.3154	0.3616	0.8721	3	0.504969
Flavobacteriia	13.951	13.814	11.6095	14.6892	14.8138	12.8284	13.092	16.2174	0.307802	13.52	14.24	-0.7219	0.5891	1.226	3	0.475694
Fusobacteriia	29.9515	30.03	27.9299	30.6457	27.6565	26.5837	27.1379	27.2869	0.028027	29.64	27.17	2.473	0.6184	3.999	3	0.119114
Gammaproteobacteria	136.784	133.735	127.984	132	129.586	128.581	122.249	128.348	0.005089	132.6	127.2	5.435	0.7336	7.408	3	0.046572
Mammalia	18849.2	18183.6	18286	18870.1	18436.1	18220.8	18587.7	18230.6	0.46374	18547	18369	178.4	213	0.8376	3	0.504969
Negativicutes	28.6886	29.4284	28.0606	26.446	28.0292	28.1161	24.2363	27.7318	0.363441	28.16	27.03	1.128	1.055	1.069	3	0.493372
Spirochaetia	25.453	26.7914	24.8183	28.7841	27.1198	27.053	26.6577	28.0822	0.293714	26.46	27.23	-0.7665	0.6037	1.27	3	0.475694
SHAM
	Taxon intensity								Test results
Class	SHAM-257-14D	SHAM-258-14D	SHAM-514-14D	SHAM-523-14D	SHAM-257-Pre	SHAM-258-Pre	SHAM-514-Pre	SHAM-523-Pre	P value	Mean of SHAM-14D	Mean of SHAM-Pre	Difference	SE of difference	t ratio	df	q value
Actinobacteria	68.4429	67.9325	71.3946	69.0231	66.3767	67.0339	71.5819	70.7309	0.761066	69.2	68.93	0.2675	0.8032	0.333	3	0.845628
Agaricomycetes	13.4674	13.529	12.6475	12.5798	10.7067	11.9123	12.5997	11.2841	0.08293	13.06	11.63	1.43	0.5578	2.564	3	0.404171
Alphaproteobacteria	28.4366	28.42	27.1492	27.4942	27.233	26.24	28.55	27.4259	0.553122	27.88	27.36	0.5128	0.7701	0.6659	3	0.691402
Bacilli	864.346	1008.74	932.652	930.735	871.004	1004.95	887.818	959.997	0.850884	934.1	930.9	3.174	15.5	0.2047	3	0.850884
Bacteroidia	2542.78	2700.94	2669.52	2598.72	2362.15	2372.61	2600.06	2446.33	0.042928	2628	2445	182.7	53.97	3.385	3	0.404171
Chitinophagia	16.629	16.3439	15.5822	15.6707	15.829	14.5462	16.0729	15.6723	0.370084	16.06	15.53	0.5263	0.5004	1.052	3	0.533794
Clostridia	23867.1	23708.9	24674.7	24379.7	22425.7	23526.3	24979.2	23881.1	0.304819	24158	23703	454.5	368.1	1.235	3	0.533794
Coriobacteriia	16.5653	14.3615	13.5827	13.0686	16.444	15.3578	15.5112	13.6598	0.14146	14.39	15.24	-0.8487	0.4277	1.984	3	0.404171
Cytophagia	28.7823	29.3531	27.0799	27.7356	26.9557	25.4518	27.4591	26.9025	0.186438	28.24	26.69	1.545	0.9056	1.707	3	0.414306
Deferribacteres	348.806	384.773	399.597	405.69	421.634	407.869	401.541	394.364	0.326178	384.7	406.4	-21.64	18.48	1.171	3	0.533794
Deltaproteobacteria	112.211	116.939	115.459	118.602	107.308	114.73	119.544	111.578	0.373655	115.8	113.3	2.513	2.41	1.043	3	0.533794
Flavobacteriia	26.6938	26.2138	26.7346	27.3666	25.9819	25.7172	28.4656	27.6132	0.750793	26.75	26.94	-0.1923	0.5524	0.3481	3	0.845628
Fusobacteriia	28.5171	27.5877	30.9163	30.2335	28.3475	26.8042	30.9682	29.0169	0.164659	29.31	28.78	0.5294	0.2893	1.83	3	0.411648
Gammaproteobacteria	45.1405	46.6585	47.5496	46.7924	42.5612	42.2865	47.8457	44.307	0.098388	46.54	44.25	2.285	0.9637	2.371	3	0.404171
Insecta	12.5262	12.1291	13.0386	10.8006	11.2611	11.528	12.8301	12.3435	0.838723	12.12	11.99	0.133	0.5996	0.2218	3	0.850884
Mammalia	16909.9	16538	17076.1	16405.6	16825.2	16645	16982.7	16983.3	0.479576	16732	16859	-126.7	157.3	0.8053	3	0.639435
Mollicutes	16.9364	14.6104	15.9491	15.4192	13.7309	13.9718	15.3635	14.5279	0.124639	15.73	14.4	1.33	0.6286	2.116	3	0.404171
Negativicutes	57.7439	57.2859	58.0054	57.3366	53.6134	56.3361	58.06	54.7556	0.130682	57.59	55.69	1.902	0.9202	2.066	3	0.404171
Spirochaetia	27.4857	26.0183	28.7189	27.0951	25.488	25.7336	27.5719	24.8776	0.049262	27.33	25.92	1.412	0.4409	3.202	3	0.404171
Verrucomicrobiae	12.0406	13.1324	11.1801	11.5475	8.98763	9.84314	12.544	11.3778	0.338513	11.98	10.69	1.287	1.133	1.136	3	0.533794
Naïve
	Taxon intensity								Test results
Class	NV-284-14D	NV-285-14D	NV-291-14D	NV-292-14D	NV-284-Pre	NV-285-Pre	NV-291-Pre	NV-292-Pre	P value	Mean of NV-14D	Mean of NV-Pre	Difference	SE of difference	t ratio	df	q value
Actinobacteria	13.8504	14.1136	13.5835	11.5049	14.5187	14.6882	13.7911	14.0933	0.155835	13.26	14.27	-1.01	0.5355	1.886	3	0.409067
Alphaproteobacteria	54.5874	53.1997	53.8857	53.8242	52.4676	54.1267	55.5476	55.8628	0.554185	53.87	54.5	-0.6269	0.9442	0.664	3	0.737678
Bacilli	1175.36	1135.51	1004.42	1004.89	1222.46	1132.4	985.573	1143.21	0.331952	1080	1121	-40.86	35.4	1.154	3	0.579174
Bacteroidia	2901.54	3048.29	2903.02	2578.87	3100.62	3138.08	2902.21	2855.57	0.103278	2858	2999	-141.2	60.91	2.318	3	0.392249
Betaproteobacteria	16.0973	16.511	17.2203	16.2913	16.2077	14.6458	16.3655	17.8275	0.735567	16.53	16.26	0.2684	0.7242	0.3706	3	0.773275
Clostridia	19853.5	19179.7	21443.9	21505.4	18653.6	19295.8	21037.4	20425.5	0.12766	20496	19853	642.6	307.3	2.091	3	0.392249
Coriobacteriia	15.3966	15.1357	15.3981	15.5112	15.1378	16.6223	14.4713	17.4856	0.471069	15.36	15.93	-0.5689	0.6916	0.8225	3	0.706604
Cytophagia	56.2396	59.4866	54.8005	47.1825	61.5759	61.7398	54.3334	53.5495	0.117779	54.43	57.8	-3.372	1.55	2.176	3	0.392249
Deferribacteres	557.256	563.361	563.71	600.213	571.185	556.114	573.495	613.246	0.233356	571.1	578.5	-7.375	4.955	1.489	3	0.490048
Deltaproteobacteria	86.93	87.0848	92.1611	84.5696	88.5826	88.2488	90.372	89.4651	0.358536	87.69	89.17	-1.481	1.369	1.082	3	0.579174
Epsilonproteobacteria	13.3438	12.4939	13.9694	12.0202	12.3576	10.9297	13.5457	13.885	0.736453	12.96	12.68	0.2773	0.751	0.3693	3	0.773275
Flavobacteriia	29.9964	29.9976	29.6603	31.1572	27.3039	31.3843	31.223	30.7279	0.968049	30.2	30.16	0.0431	0.9913	0.04348	3	0.968049
Gammaproteobacteria	62.5012	62.8083	62.7416	60.5024	60.9192	59.9391	60.2122	61.0457	0.126929	62.14	60.53	1.609	0.7675	2.097	3	0.392249
Insecta	33.5362	29.0187	26.882	32.4694	34.2639	33.3254	32.3534	32.6993	0.13075	30.48	33.16	-2.684	1.299	2.066	3	0.392249
Kinetoplastea	16.8603	13.9506	13.5793	15.351	15.0226	14.1852	10.8303	11.5196	0.098315	14.94	12.89	2.046	0.8625	2.372	3	0.392249
Mammalia	17045.1	18251.2	17239.7	15682.9	18493.7	18519.1	17704.5	17124.7	0.063307	17055	17960	-905.8	314	2.884	3	0.392249
Mollicutes	29.2258	30.4651	29.1697	31.2137	28.5054	28.8757	29.4162	27.6545	0.181037	30.02	28.61	1.406	0.8099	1.736	3	0.422419
Negativicutes	42.3877	39.9281	43.9741	45.6811	42.2085	40.3137	44.6041	43.4563	0.629576	42.99	42.65	0.3471	0.6484	0.5353	3	0.737678
Saccharomycetes	15.5596	14.6817	16.388	15.3284	15.6094	14.3985	15.6036	15.7197	0.576103	15.49	15.33	0.1566	0.2505	0.6253	3	0.737678
Spirochaetia	12.858	11.2895	13.916	13.7657	12.3154	11.7843	13.273	13.0705	0.307088	12.96	12.61	0.3465	0.2822	1.228	3	0.579174
Verrucomicrobiae	25.2655	27.0728	23.6645	24.2358	26.7867	26.8789	22.4771	22.6141	0.632295	25.06	24.69	0.3704	0.6978	0.5309	3	0.737678

## Sheet: Function quantification_KEGG
SNI
	KEGG mapped proteins (K number)								Normalized pathway intensity								Test results
KEGG pathway	SNI-259-14D	SNI-259-Pre	SNI-260-14D	SNI-260-Pre	SNI-485-14D	SNI-485-Pre	SNI-509-14D	SNI-509-Pre	SNI-259-14D	SNI-260-14D	SNI-485-14D	SNI-509-14D	SNI-259-Pre	SNI-260-Pre	SNI-485-Pre	SNI-509-Pre	logFC	AveExpr	t	P.Value	adj.P.Val	B
ABC transporters	8	8	8	8	8	8	8	8	2.85374e+06	2.27918e+06	2.35843e+06	1.88164e+06	2.06753e+06	1.6438e+06	1.55857e+06	1.74906e+06	-0.409862	20.9394	-2.18875	0.0311189	0.171996	-4.24653
Bacterial chemotaxis	2	2	2	2	2	2	2	2	4.24642e+06	1.44527e+06	2.75389e+06	2.42682e+06	2.44118e+06	1.00311e+06	990599	2.0639e+06	-0.758579	20.8918	-4.04022	0.00010984	0.00170252	0.878771
Benzoate degradation	1	1	1	1	1	1	1	1	1.40124e+06	1.66737e+06	2.5105e+06	1.45118e+06	1.06182e+06	1.72542e+06	1.19966e+06	1.19533e+06	-0.42399	20.4919	-2.01991	0.0462704	0.171996	-4.58227
beta-Lactam resistance	1	1	1	1	1	1	1	1	1.79248e+06	1.2254e+06	1.09076e+06	1.03279e+06	1.57974e+06	967891	973419	1.14121e+06	-0.135697	20.1905	-0.535011	0.593919	0.708134	-6.41815
Biosynthesis of amino acids	2	2	2	2	2	2	2	2	7.03647e+06	1.00018e+07	9.28841e+06	5.95617e+06	5.59108e+06	5.82046e+06	9.92724e+06	3.63932e+06	-0.431883	22.6973	-1.85628	0.0665792	0.171996	-4.88403
Biosynthesis of secondary metabolites	2	2	2	2	2	2	2	2	7.03647e+06	1.00018e+07	9.28841e+06	5.95617e+06	5.59108e+06	5.82046e+06	9.92724e+06	3.63932e+06	-0.431883	22.6973	-1.85628	0.0665792	0.171996	-4.88403
Butanoate metabolism	2	2	2	2	2	2	2	2	3.17901e+06	6.07597e+06	5.31591e+06	2.37326e+06	3.18059e+06	6.09311e+06	2.26106e+06	2.59873e+06	-0.2744	21.7766	-0.911353	0.364466	0.541893	-6.15011
Carbon fixation in photosynthetic organisms	1	1	1	1	1	1	1	1	1.21749e+07	1.79814e+07	1.66298e+07	1.05314e+07	9.09149e+06	9.46657e+06	1.83849e+07	5.82381e+06	-0.514209	23.4811	-2.11273	0.0373025	0.171996	-4.40071
Carbon metabolism	2	2	2	2	2	2	2	2	7.03647e+06	1.00018e+07	9.28841e+06	5.95617e+06	5.59108e+06	5.82046e+06	9.92724e+06	3.63932e+06	-0.431883	22.6973	-1.85628	0.0665792	0.171996	-4.88403
Flagellar assembly	1	1	1	1	1	1	1	1	4.9793e+07	8.89674e+07	7.13176e+07	4.29609e+07	5.55945e+07	6.50558e+07	5.66816e+07	4.66554e+07	-0.12624	25.792	-0.780616	0.437011	0.541893	-6.25885
Folate biosynthesis	1	1	1	1	1	1	1	1	150250	139201	20381.8	56274.5	15998.7	20211.2	10280.2	4841.98	-2.63538	14.7771	-4.83131	5.33e-06	0.000165135	3.73368
Fructose and mannose metabolism	1	1	2	1	2	2	1	1	1.898e+06	1.01254e+06	973903	1.38089e+06	2.09067e+06	2.17435e+06	748876	1.45482e+06	0.23457	20.3913	1.04756	0.297557	0.541893	-6.0193
Galactose metabolism	1	1	1	1	1	1	1	1	1.898e+06	2.02213e+06	1.94699e+06	1.38089e+06	2.09067e+06	2.17435e+06	1.46958e+06	1.45482e+06	-0.0216025	20.7626	-0.11944	0.905184	0.905184	-6.55268
Glycolysis / Gluconeogenesis	2	2	2	2	2	2	2	2	7.03647e+06	1.00018e+07	9.28841e+06	5.95617e+06	5.59108e+06	5.82046e+06	9.92724e+06	3.63932e+06	-0.431883	22.6973	-1.85628	0.0665792	0.171996	-4.88403
Legionellosis	2	2	2	2	2	2	2	2	2.80104e+07	5.09969e+07	4.09645e+07	2.474e+07	3.06441e+07	3.6486e+07	3.40614e+07	2.54656e+07	-0.144488	24.9757	-0.802179	0.424494	0.541893	-6.24205
Metabolic pathways	5	5	5	5	5	5	5	5	4.11624e+06	6.45894e+06	5.8458e+06	3.34303e+06	3.51187e+06	4.76947e+06	4.87738e+06	2.49619e+06	-0.33732	22.0182	-1.13993	0.257243	0.531635	-5.92049
Methane metabolism	1	1	1	1	1	1	1	1	1.898e+06	2.02213e+06	1.94699e+06	1.38089e+06	2.09067e+06	2.17435e+06	1.46958e+06	1.45482e+06	-0.0216025	20.7626	-0.11944	0.905184	0.905184	-6.55268
Microbial metabolism in diverse environments	4	4	4	4	4	4	4	4	5.10774e+06	8.03887e+06	7.30216e+06	4.16471e+06	4.38583e+06	5.95678e+06	6.09415e+06	3.11903e+06	-0.332578	22.3368	-1.259	0.211181	0.467614	-5.78118
Other glycan degradation	1	1	1	1	1	1	1	1	567170	69278.6	448185	126747	255249	104601	21964.4	626371	-0.65081	17.4043	-0.513131	0.636178	0.730426	-6.40229
Pentose phosphate pathway	1	1	1	1	1	1	1	1	1.898e+06	2.02213e+06	1.94699e+06	1.38089e+06	2.09067e+06	2.17435e+06	1.46958e+06	1.45482e+06	-0.0216025	20.7626	-0.11944	0.905184	0.905184	-6.55268
Phenylalanine metabolism	1	1	1	1	1	1	1	1	1.40124e+06	1.66737e+06	2.5105e+06	1.45118e+06	1.06182e+06	1.72542e+06	1.19966e+06	1.19533e+06	-0.42399	20.4919	-2.01991	0.0462704	0.171996	-4.58227
Propanoate metabolism	1	1	1	1	1	1	1	1	4.95678e+06	1.04846e+07	8.12132e+06	3.29534e+06	5.29935e+06	1.04608e+07	3.32246e+06	4.00214e+06	-0.228996	22.4275	-0.89505	0.373071	0.541893	-6.16457
Purine metabolism	1	1	1	1	1	1	1	1	235948	116545	160737	99810.7	204765	73004.1	52158.1	46467.5	-0.901512	16.6942	-2.73815	0.00740436	0.0573838	-2.99012
Pyrimidine metabolism	1	1	1	1	1	1	1	1	235948	116545	160737	99810.7	204765	73004.1	52158.1	46467.5	-0.901512	16.6942	-2.73815	0.00740436	0.0573838	-2.99012
Pyruvate metabolism	1	1	1	1	1	1	1	1	4.95678e+06	1.04846e+07	8.12132e+06	3.29534e+06	5.29935e+06	1.04608e+07	3.32246e+06	4.00214e+06	-0.228996	22.4275	-0.89505	0.373071	0.541893	-6.16457
Quorum sensing	3	3	4	3	4	4	3	3	1.06884e+06	568022	616061	689361	767632	1.26563e+06	653902	946501	0.305404	19.5954	0.804714	0.423037	0.541893	-6.24005
Ribosome	2	2	2	2	2	2	2	2	105149	256866	182601	68246.3	104460	264049	161164	104408	0.115886	17.1053	0.379267	0.705354	0.780928	-6.48854
RNA degradation	2	2	2	2	2	2	2	2	4.06288e+06	7.52433e+06	6.27922e+06	3.94997e+06	3.89218e+06	5.0453e+06	6.45545e+06	2.86529e+06	-0.265443	22.1905	-0.946623	0.346284	0.541893	-6.11795
Salmonella infection	1	1	1	1	1	1	1	1	4.9793e+07	8.89674e+07	7.13176e+07	4.29609e+07	5.55945e+07	6.50558e+07	5.66816e+07	4.66554e+07	-0.12624	25.792	-0.780616	0.437011	0.541893	-6.25885
Tuberculosis	1	1	1	1	1	1	1	1	6.22776e+06	1.30265e+07	1.06114e+07	6.51904e+06	5.69369e+06	7.91625e+06	1.14413e+07	4.27576e+06	-0.33694	22.8767	-1.43946	0.153376	0.365744	-5.54465
Two-component system	1	1	1	1	1	1	1	1	4.9793e+07	8.89674e+07	7.13176e+07	4.29609e+07	5.55945e+07	6.50558e+07	5.66816e+07	4.66554e+07	-0.12624	25.792	-0.780616	0.437011	0.541893	-6.25885
SHAM
	KEGG mapped proteins (K number)								Normalized pathway intensity								Test results
KEGG pathway	SHAM-257-14D	SHAM-257-Pre	SHAM-258-14D	SHAM-258-Pre	SHAM-514-14D	SHAM-514-Pre	SHAM-523-14D	SHAM-523-Pre	SHAM-257-14D	SHAM-258-14D	SHAM-514-14D	SHAM-523-14D	SHAM-257-Pre	SHAM-258-Pre	SHAM-514-Pre	SHAM-523-Pre	logFC	AveExpr	t	P.Value	adj.P.Val	B
2-Oxocarboxylic acid metabolism	1	1	1	1	1	1	1	1	3.21173e+06	2.55344e+06	3.39248e+06	2.84307e+06	1.51092e+06	4.67564e+06	3.4468e+06	3.35437e+06	0.0115782	21.5138	0.0323985	0.974185	0.982068	-6.34769
ABC transporters	9	9	9	9	9	9	9	9	1.76778e+06	1.6424e+06	2.48999e+06	2.27804e+06	1.00164e+06	1.92885e+06	2.49087e+06	1.74593e+06	-0.242728	20.8206	-0.657257	0.511739	0.597029	-6.13868
Alanine, aspartate and glutamate metabolism	1	1	1	1	1	1	1	1	4.93767e+06	5.30493e+06	8.48884e+06	6.73062e+06	2.41135e+06	3.1556e+06	6.82726e+06	4.88974e+06	-0.639663	22.2486	-2.04562	0.0420468	0.113203	-4.31872
Amino sugar and nucleotide sugar metabolism	3	3	3	3	3	3	3	3	1.21224e+06	1.41253e+06	1.96932e+06	1.98933e+06	399317	1.26923e+06	2.05496e+06	1.10062e+06	-0.637239	20.2994	-1.66031	0.0983511	0.177135	-5.01124
Arginine biosynthesis	1	1	1	1	1	1	1	1	4.93767e+06	5.30493e+06	8.48884e+06	6.73062e+06	2.41135e+06	3.1556e+06	6.82726e+06	4.88974e+06	-0.639663	22.2486	-2.04562	0.0420468	0.113203	-4.31872
Bacterial chemotaxis	1	1	1	1	1	1	1	1	2.46692e+06	2.11434e+06	1.73516e+06	1.96361e+06	1.83234e+06	2.67321e+06	1.96681e+06	1.88754e+06	0.00828409	20.9736	0.0225035	0.982068	0.982068	-6.34795
Bacterial secretion system	2	1	2	2	2	2	2	2	18443	38657.7	31578.6	35980.6	2944.54	31023.5	34237.8	15994.4	-1.00434	14.3705	-1.33018	0.184909	0.26288	-5.49006
Benzoate degradation	2	2	2	2	2	2	2	2	835393	746246	1.51831e+06	1.10729e+06	426499	1.11099e+06	1.45938e+06	1.012e+06	-0.145682	19.8757	-0.366733	0.714189	0.757474	-6.28297
beta-Lactam resistance	1	1	1	1	1	1	1	1	425392	277983	623657	476257	416750	474848	548992	700776	0.279025	18.8632	0.747423	0.455648	0.559568	-6.07726
Biofilm formation - Escherichia coli	2	2	2	2	2	2	2	2	789387	898331	1.15389e+06	1.28552e+06	262739	901788	1.35181e+06	647160	-0.585836	19.6569	-1.48377	0.139376	0.212094	-5.28044
Biosynthesis of amino acids	7	7	7	7	7	7	7	7	2.7132e+06	3.22364e+06	4.46244e+06	5.14242e+06	1.24196e+06	2.65282e+06	4.23231e+06	2.2384e+06	-0.671226	21.5082	-1.87637	0.0619982	0.145327	-4.64065
Biosynthesis of ansamycins	1	1	1	1	1	1	1	1	428152	537043	590686	594245	228158	409645	674861	370401	-0.447131	18.8002	-1.20317	0.230271	0.309981	-5.64611
Biosynthesis of secondary metabolites	17	17	17	17	17	17	17	17	1.94178e+06	2.31349e+06	3.21622e+06	3.66574e+06	814046	1.98415e+06	3.05055e+06	1.60981e+06	-0.684814	21.0209	-1.85952	0.0643593	0.145327	-4.67118
Butanoate metabolism	5	4	5	5	5	5	5	5	2.57148e+06	2.56843e+06	5.06621e+06	4.55934e+06	1.20801e+06	2.6967e+06	4.73574e+06	2.66649e+06	-0.472717	21.5085	-1.32152	0.187771	0.26288	-5.50119
Carbon fixation in photosynthetic organisms	8	8	8	8	8	8	8	8	3.82929e+06	4.47246e+06	6.8308e+06	7.70338e+06	1.47557e+06	3.34031e+06	6.14335e+06	2.95286e+06	-0.833325	21.9688	-2.52614	0.0122734	0.0740543	-3.25325
Carbon fixation pathways in prokaryotes	9	8	9	9	9	9	9	9	1.87609e+06	1.87083e+06	3.42021e+06	3.23872e+06	670488	1.50255e+06	2.80804e+06	1.67327e+06	-0.759498	20.872	-2.06066	0.0405735	0.113203	-4.28875
Carbon metabolism	22	21	22	22	22	22	22	22	1.86416e+06	2.11695e+06	3.40049e+06	3.6143e+06	744354	1.61537e+06	2.987e+06	1.59106e+06	-0.771342	20.9459	-2.09464	0.0374082	0.113203	-4.22028
Cationic antimicrobial peptide (CAMP) resistance	1	1	0	0	1	1	1	1	9081.08	#DIV/0!	5208.78	5623.08	8568.02	#DIV/0!	33243.5	114124	2.31109	13.8064	2.32543	0.0210079	0.0919097	-3.61264
Citrate cycle (TCA cycle)	5	4	5	5	5	5	5	5	2.20998e+06	2.62167e+06	4.26794e+06	4.70971e+06	907440	1.95731e+06	3.64003e+06	2.07549e+06	-0.779388	21.2578	-2.11519	0.0355978	0.113203	-4.17831
Cyanoamino acid metabolism	1	1	1	1	1	1	1	1	147199	197921	275029	297158	55363.9	122565	219576	126638	-0.914378	17.2958	-2.39262	0.0176136	0.0821967	-3.57178
Cysteine and methionine metabolism	1	1	1	1	1	1	1	1	550446	1.057e+06	630163	1.49923e+06	175570	172926	714337	407609	-1.4896	18.9709	-3.96399	0.00010118	0.00708259	1.27261
Degradation of aromatic compounds	1	1	1	1	1	1	1	1	62798.9	49369.8	119333	119302	115049	63445.1	113775	128409	0.318156	16.4738	0.675622	0.500027	0.593253	-6.12681
Fatty acid degradation	1	1	1	1	1	1	1	1	1.60799e+06	1.44312e+06	2.91728e+06	2.09528e+06	737950	2.15853e+06	2.80499e+06	1.89558e+06	-0.185984	20.7951	-0.502357	0.615945	0.663326	-6.2258
Fatty acid metabolism	1	1	1	1	1	1	1	1	1.60799e+06	1.44312e+06	2.91728e+06	2.09528e+06	737950	2.15853e+06	2.80499e+06	1.89558e+06	-0.185984	20.7951	-0.502357	0.615945	0.663326	-6.2258
Flagellar assembly	1	1	1	1	1	1	1	1	6.4441e+07	7.01655e+07	9.41838e+07	8.08318e+07	3.64724e+07	4.2642e+07	8.65245e+07	5.88059e+07	-0.530248	25.9257	-3.20738	0.00154998	0.0320836	-1.35892
Folate biosynthesis	1	1	1	1	1	1	1	1	1.43028e+06	1.40104e+06	972972	1.41563e+06	643411	1.6029e+06	691060	628080	-0.656077	19.9697	-1.65864	0.0986892	0.177135	-5.01394
Fructose and mannose metabolism	7	7	7	7	7	7	7	7	1.14265e+06	1.33075e+06	1.70538e+06	1.73712e+06	385832	1.09162e+06	1.80489e+06	840142	-0.704575	20.1221	-1.80033	0.0732506	0.155826	-4.77624
Galactose metabolism	1	1	1	1	1	1	1	1	936908	1.06433e+06	1.15951e+06	1.53439e+06	261042	1.10703e+06	1.58384e+06	694883	-0.619946	19.8284	-1.558	0.120746	0.196332	-5.17094
Glycerolipid metabolism	1	1	1	1	1	1	1	1	55706.5	18490.4	45322.2	30992.3	33696.7	29689.3	49986.3	109702	0.480714	15.3223	0.790959	0.429864	0.53733	-6.04477
Glycine, serine and threonine metabolism	2	2	2	2	2	2	2	2	126178	144132	401534	284635	38180.1	88611.9	244405	103208	-1.15155	17.1282	-2.89325	0.00421667	0.0368959	-2.28835
Glycolysis / Gluconeogenesis	9	8	9	9	9	9	9	9	3.0771e+06	3.75165e+06	5.65121e+06	6.39183e+06	1.37707e+06	2.77141e+06	5.1127e+06	2.63831e+06	-0.754489	21.7303	-2.19393	0.0293428	0.113203	-4.01376
Glyoxylate and dicarboxylate metabolism	5	5	5	5	5	5	5	5	497304	596840	880624	874351	201839	510341	802869	514118	-0.60657	19.0959	-1.60387	0.110254	0.183756	-5.1006
Inositol phosphate metabolism	2	2	2	2	2	2	2	2	2.57623e+06	3.26735e+06	4.28346e+06	4.27533e+06	881100	2.79606e+06	4.58246e+06	2.06474e+06	-0.681334	21.4079	-1.87051	0.0628111	0.145327	-4.6513
Legionellosis	2	2	2	2	2	2	2	2	3.59784e+07	3.8605e+07	5.39921e+07	4.83269e+07	1.96282e+07	2.41027e+07	4.85515e+07	3.21011e+07	-0.574309	25.0917	-3.06328	0.00247727	0.0320836	-1.79715
Lysine degradation	1	1	1	1	1	1	1	1	1.60799e+06	1.44312e+06	2.91728e+06	2.09528e+06	737950	2.15853e+06	2.80499e+06	1.89558e+06	-0.185984	20.7951	-0.502357	0.615945	0.663326	-6.2258
Metabolic pathways	39	38	39	39	39	39	39	39	1.5937e+06	1.78096e+06	2.79761e+06	2.85643e+06	643218	1.48985e+06	2.51301e+06	1.37007e+06	-0.695307	20.7098	-1.86252	0.0639331	0.145327	-4.66576
Methane metabolism	5	5	5	5	5	5	5	5	386648	464754	629046	678972	126507	198908	540688	252339	-1.12063	18.4453	-3.13867	0.00194235	0.0320836	-1.57039
Microbial metabolism in diverse environments	25	24	25	25	25	25	25	25	1.89585e+06	2.12906e+06	3.50493e+06	3.66321e+06	751204	1.74808e+06	3.14291e+06	1.61172e+06	-0.740451	20.9852	-2.01169	0.0455364	0.118057	-4.38547
Nicotinate and nicotinamide metabolism	1	1	1	1	1	1	1	1	1.43028e+06	1.40104e+06	972972	1.41563e+06	643411	1.6029e+06	691060	628080	-0.656077	19.9697	-1.65864	0.0986892	0.177135	-5.01394
Nitrogen metabolism	1	1	1	1	1	1	1	1	4.93767e+06	5.30493e+06	8.48884e+06	6.73062e+06	2.41135e+06	3.1556e+06	6.82726e+06	4.88974e+06	-0.639663	22.2486	-2.04562	0.0420468	0.113203	-4.31872
One carbon pool by folate	4	4	4	4	4	4	4	4	314925	329236	680609	675830	113544	299527	453500	264686	-0.886575	18.3908	-2.49994	0.0131902	0.0740543	-3.31712
Other glycan degradation	4	4	3	3	4	4	4	4	130874	73301.2	188069	34885.5	162931	141301	176003	109879	0.705628	16.7955	1.62646	0.105358	0.179879	-5.0652
Oxidative phosphorylation	2	2	2	2	2	2	2	2	590810	622617	1.47506e+06	1.25995e+06	172431	435499	1.1206e+06	539382	-0.978209	19.3053	-2.56865	0.0109064	0.0740543	-3.14821
Pantothenate and CoA biosynthesis	1	1	1	1	1	1	1	1	3.21173e+06	2.55344e+06	3.39248e+06	2.84307e+06	1.51092e+06	4.67564e+06	3.4468e+06	3.35437e+06	0.0115782	21.5138	0.0323985	0.974185	0.982068	-6.34769
Pentose and glucuronate interconversions	7	7	6	6	7	7	7	7	232990	365163	251794	238625	112648	183470	247593	210305	-0.561997	17.7476	-1.5344	0.126443	0.196689	-5.20633
Pentose phosphate pathway	5	5	5	5	5	5	5	5	836362	905729	1.32186e+06	1.21756e+06	305825	696533	1.27816e+06	695654	-0.671594	19.6673	-1.69855	0.0908926	0.177135	-4.94896
Pertussis	1	1	1	1	1	1	1	1	40859	4369.33	20994.3	13257.3	81753.5	75500.6	59138	24090.7	1.86685	14.7994	2.72895	0.00689503	0.053628	-2.73637
Photosynthesis	1	1	1	1	1	1	1	1	871789	870430	1.74203e+06	1.62148e+06	242849	696917	1.61007e+06	769083	-0.838601	19.7873	-2.10444	0.0365357	0.113203	-4.20033
Propanoate metabolism	5	5	5	5	5	5	5	5	1.53507e+06	1.50137e+06	3.17055e+06	2.75085e+06	628132	1.9438e+06	3.07925e+06	1.47616e+06	-0.464186	20.7818	-1.25217	0.211908	0.290854	-5.58776
Protein export	2	1	2	2	2	2	2	2	18443	38657.7	31578.6	35980.6	2944.54	31023.5	34237.8	15994.4	-1.00434	14.3705	-1.33018	0.184909	0.26288	-5.49006
Protein processing in endoplasmic reticulum	1	1	1	1	1	1	1	1	220978	292693	596116	665477	140190	339405	565191	257976	-0.471728	18.3746	-1.33283	0.184039	0.26288	-5.48664
Purine metabolism	3	3	3	3	3	3	3	3	793038	834160	727391	995831	303574	905893	765011	442849	-0.590666	19.3709	-1.54686	0.123409	0.196332	-5.18771
Pyrimidine metabolism	2	2	2	2	2	2	2	2	721103	719073	511332	726550	324840	805323	355595	316832	-0.677105	18.999	-1.799	0.073461	0.155826	-4.77856
Pyruvate metabolism	8	7	8	8	8	8	8	8	3.40748e+06	3.53876e+06	6.48392e+06	6.3602e+06	1.30896e+06	3.2481e+06	5.72918e+06	2.98968e+06	-0.692888	21.8246	-2.04795	0.0418152	0.113203	-4.31408
Quorum sensing	9	8	8	8	9	9	9	9	346599	230852	270093	251953	231622	547749	280856	270091	0.205429	18.1541	0.577988	0.563894	0.647092	-6.18617
Ribosome	29	29	29	29	29	29	29	29	888626	1.02844e+06	1.63753e+06	1.55523e+06	326371	813064	1.45842e+06	944121	-0.667819	19.9023	-1.68272	0.0939225	0.177135	-4.97491
RNA degradation	2	2	2	2	2	2	2	2	4.42273e+06	4.31465e+06	8.55099e+06	1.00492e+07	1.63869e+06	3.29753e+06	6.6276e+06	3.23383e+06	-0.955907	22.1234	-2.98154	0.00320836	0.0320836	-2.03679
RNA polymerase	1	1	1	1	1	1	1	1	11927.8	37104.8	49693	37472.9	6267.61	7744.29	20129.8	5584.3	-1.80971	13.9741	-2.18634	0.0299009	0.113203	-4.02988
Salmonella infection	1	1	1	1	1	1	1	1	6.4441e+07	7.01655e+07	9.41838e+07	8.08318e+07	3.64724e+07	4.2642e+07	8.65245e+07	5.88059e+07	-0.530248	25.9257	-3.20738	0.00154998	0.0320836	-1.35892
Sphingolipid metabolism	1	1	1	1	1	1	1	1	107743	48032.8	564224	35249.6	120133	134688	339804	62973.1	0.437534	16.8388	1.01927	0.309253	0.400883	-5.84433
Starch and sucrose metabolism	5	5	5	5	5	5	5	5	737286	864842	1.20324e+06	1.21201e+06	248952	768299	1.24627e+06	667387	-0.636807	19.5869	-1.62852	0.104922	0.179879	-5.06196
Streptomycin biosynthesis	2	2	2	2	2	2	2	2	595268	1.00742e+06	817765	1.01892e+06	159052	614089	987548	416940	-0.908787	19.2269	-2.39454	0.0175242	0.0821967	-3.56733
Styrene degradation	1	1	1	1	1	1	1	1	62798.9	49369.8	119333	119302	115049	63445.1	113775	128409	0.318156	16.4738	0.675622	0.500027	0.593253	-6.12681
Terpenoid backbone biosynthesis	3	3	3	3	3	3	3	3	897325	1.03478e+06	1.58649e+06	1.41834e+06	387541	1.14065e+06	1.58834e+06	910495	-0.427139	19.9838	-1.0806	0.281119	0.371289	-5.78187
Thiamine metabolism	1	1	1	1	1	1	1	1	1.43028e+06	1.40104e+06	972972	1.41563e+06	643411	1.6029e+06	691060	628080	-0.656077	19.9697	-1.65864	0.0986892	0.177135	-5.01394
Tryptophan metabolism	1	1	1	1	1	1	1	1	1.60799e+06	1.44312e+06	2.91728e+06	2.09528e+06	737950	2.15853e+06	2.80499e+06	1.89558e+06	-0.185984	20.7951	-0.502357	0.615945	0.663326	-6.2258
Tuberculosis	2	2	2	2	2	2	2	2	4.42273e+06	4.31465e+06	8.55099e+06	1.00492e+07	1.63869e+06	3.29753e+06	6.6276e+06	3.23383e+06	-0.955907	22.1234	-2.98154	0.00320836	0.0320836	-2.03679
Two-component system	3	3	3	3	3	3	3	3	2.24931e+07	2.43365e+07	3.26913e+07	2.81142e+07	1.26179e+07	1.54678e+07	3.00069e+07	2.04432e+07	-0.51779	24.4078	-2.48465	0.0137529	0.0740543	-3.35408
Valine, leucine and isoleucine biosynthesis	1	1	1	1	1	1	1	1	3.21173e+06	2.55344e+06	3.39248e+06	2.84307e+06	1.51092e+06	4.67564e+06	3.4468e+06	3.35437e+06	0.0115782	21.5138	0.0323985	0.974185	0.982068	-6.34769
Valine, leucine and isoleucine degradation	3	3	3	3	3	3	3	3	596291	576428	1.16598e+06	858458	259421	752071	1.02681e+06	678780	-0.33479	19.3793	-0.876463	0.381785	0.485908	-5.97563
Naïve
	KEGG mapped proteins (K number)								Normalized pathway intensity								Test results
KEGG pathway	NV-284-14D	NV-284-Pre	NV-285-14D	NV-285-Pre	NV-291-14D	NV-291-Pre	NV-292-14D	NV-292-Pre	NV-284-14D	NV-284-Pre	NV-285-14D	NV-285-Pre	NV-291-14D	NV-291-Pre	NV-292-14D	NV-292-Pre	logFC	AveExpr	t	P.Value	adj.P.Val	B
2-Oxocarboxylic acid metabolism	2	2	2	2	2	2	2	2	312146	66229.2	112511	86344.8	316281	157728	423462	154629	-1.26894	17.3641	-3.18152	0.00170355	0.0132223	-1.76938
ABC transporters	9	9	9	9	9	9	9	9	935598	434863	766175	650011	2.21453e+06	1.36621e+06	2.2626e+06	1.29887e+06	-0.710024	20.0377	-2.24044	0.026185	0.0740194	-4.28733
Alanine, aspartate and glutamate metabolism	1	1	1	1	1	1	1	1	123127	17919.9	44605.9	21644.6	183432	109840	228880	57956	-1.63629	16.0928	-3.03648	0.00271897	0.0163138	-2.21441
Amino sugar and nucleotide sugar metabolism	4	4	4	4	4	4	4	4	892249	291617	394382	342380	1.43127e+06	946145	1.95371e+06	765596	-0.941523	19.455	-2.79799	0.00565543	0.0266613	-2.90107
Arginine and proline metabolism	1	1	1	1	1	1	1	1	163719	326584	291811	367472	160609	292034	87005.6	225495	0.891334	17.7401	2.29769	0.022635	0.0705173	-4.15911
Arginine biosynthesis	2	2	2	2	2	2	2	2	143423	172252	168208	194558	172021	200937	157943	141726	0.135515	17.3555	0.339379	0.734688	0.769673	-6.7075
Ascorbate and aldarate metabolism	1	1	1	1	1	1	1	1	179225	63840.3	110230	116068	436443	289549	494720	299569	-0.682622	17.622	-1.76435	0.0792313	0.137612	-5.2282
Bacterial chemotaxis	4	5	4	5	5	5	5	5	565222	253910	509266	345383	818311	634159	1.05061e+06	582874	-0.733125	19.0613	-2.10052	0.0369625	0.0813174	-4.58706
Benzoate degradation	2	2	2	2	2	2	2	2	1.38172e+06	636508	674575	846248	2.59975e+06	2.29337e+06	2.63585e+06	2.03558e+06	-0.33621	20.4323	-1.2564	0.210467	0.277816	-5.98537
beta-Lactam resistance	1	1	1	1	1	1	1	1	930857	419238	805605	743996	1.32643e+06	1.74704e+06	2.05788e+06	1.31283e+06	-0.379172	20.0004	-1.18065	0.239173	0.309518	-6.07647
Biofilm formation - Escherichia coli	3	3	3	3	3	3	3	3	866610	204328	341186	302215	1.51364e+06	880250	1.94816e+06	730055	-1.11439	19.3249	-3.2924	0.00117836	0.0132223	-1.41517
Biofilm formation - Pseudomonas aeruginosa	0	1	0	1	1	1	1	1	#DIV/0!	6834.03	#DIV/0!	7714.3	17167.9	16799.8	40541.8	22074.4	-0.454151	13.9154	-0.443448	0.657931	0.700378	-6.32846
Biosynthesis of amino acids	12	12	12	12	12	12	12	12	2.0313e+06	1.73615e+06	2.11923e+06	1.60377e+06	2.61358e+06	2.30047e+06	3.15379e+06	2.13722e+06	-0.343508	21.0471	-1.66593	0.0973256	0.15294	-5.3948
Biosynthesis of secondary metabolites	23	23	23	23	23	23	23	23	1.7982e+06	1.29555e+06	1.52023e+06	1.25758e+06	2.62217e+06	2.13338e+06	2.99518e+06	1.79267e+06	-0.446194	20.8145	-1.95517	0.0519845	0.10605	-4.87794
Butanoate metabolism	8	8	8	8	8	8	8	8	1.93174e+06	987601	1.03855e+06	1.12746e+06	3.7165e+06	2.81535e+06	3.82094e+06	2.23704e+06	-0.50559	20.8869	-2.28296	0.0235058	0.0705173	-4.19241
Carbon fixation in photosynthetic organisms	5	5	5	5	5	5	5	5	5.73196e+06	3.8769e+06	4.23914e+06	3.73202e+06	9.35108e+06	7.20498e+06	1.1028e+07	5.94716e+06	-0.503745	22.5025	-2.51903	0.0125669	0.0446773	-3.63301
Carbon fixation pathways in prokaryotes	6	6	6	6	6	6	6	6	2.12596e+06	1.45355e+06	1.32587e+06	1.59968e+06	4.04873e+06	3.28931e+06	4.75623e+06	2.90326e+06	-0.322377	21.211	-1.55414	0.121765	0.178729	-5.57243
Carbon metabolism	19	19	19	19	19	19	19	19	2.46132e+06	1.83407e+06	2.07285e+06	1.82408e+06	3.86893e+06	3.21979e+06	4.43355e+06	2.72117e+06	-0.394509	21.3472	-1.88138	0.0614023	0.115321	-5.01764
Cationic antimicrobial peptide (CAMP) resistance	2	2	2	2	2	2	2	2	54093.1	400098	38445.5	488090	165134	548415	155742	298237	2.30551	17.5367	5.91373	1.47e-08	9.67e-07	10.4935
Citrate cycle (TCA cycle)	7	7	7	7	7	7	7	7	1.60211e+06	1.06004e+06	1.03795e+06	1.06631e+06	2.70266e+06	1.98269e+06	3.07984e+06	1.63651e+06	-0.479031	20.6398	-1.94649	0.0530251	0.10605	-4.89466
Cysteine and methionine metabolism	3	3	3	3	3	3	3	3	302329	153375	126383	105370	245238	157171	371239	236556	-0.633352	17.5731	-1.62986	0.104736	0.160758	-5.45345
Fatty acid degradation	2	2	2	2	2	2	2	2	2.07618e+06	1.05352e+06	1.0608e+06	1.39751e+06	4.30473e+06	4.12575e+06	4.21742e+06	2.78421e+06	-0.310342	21.1067	-1.50642	0.13357	0.183176	-5.6445
Fatty acid metabolism	2	2	2	2	2	2	2	2	2.07618e+06	1.05352e+06	1.0608e+06	1.39751e+06	4.30473e+06	4.12575e+06	4.21742e+06	2.78421e+06	-0.310342	21.1067	-1.50642	0.13357	0.183176	-5.6445
Flagellar assembly	2	2	2	2	2	1	2	1	2.91745e+07	2.0922e+07	2.72856e+07	3.3108e+07	4.58328e+07	8.26695e+07	3.53508e+07	6.60768e+07	0.388183	25.2003	1.73738	0.0838906	0.141969	-5.27479
Fructose and mannose metabolism	6	6	6	6	6	6	6	6	1.08788e+06	438399	454179	535215	2.14843e+06	1.3351e+06	2.6691e+06	1.25866e+06	-0.711287	19.9515	-2.17665	0.0307024	0.0750503	-4.42637
Galactose metabolism	4	4	4	4	4	4	4	4	592641	256117	264073	281311	1.08167e+06	693409	1.2999e+06	715922	-0.655286	19.0579	-1.87664	0.0620533	0.115321	-5.02644
Glycine, serine and threonine metabolism	2	2	2	2	2	2	2	2	554882	161507	189371	189651	692524	542083	1.00159e+06	469781	-0.80601	18.584	-2.19746	0.0291592	0.0740194	-4.38144
Glycolysis / Gluconeogenesis	13	13	13	13	13	13	13	13	2.73237e+06	2.17559e+06	2.49731e+06	2.044e+06	3.91491e+06	3.26235e+06	4.6785e+06	2.91421e+06	-0.390933	21.4775	-1.85813	0.0646496	0.115321	-5.06055
Glyoxylate and dicarboxylate metabolism	4	4	4	4	4	4	4	4	507927	264595	236358	341835	854824	805143	769032	664846	-0.176229	18.9276	-0.496077	0.620396	0.682435	-6.6429
Inositol phosphate metabolism	1	1	1	1	1	1	1	1	4.18852e+06	1.47039e+06	1.57106e+06	1.93267e+06	8.29576e+06	4.9794e+06	1.06748e+07	4.42033e+06	-0.804943	21.8258	-3.92356	0.000120672	0.00398218	0.832324
Legionellosis	2	2	2	2	2	2	2	2	3.22747e+07	2.29897e+07	2.90074e+07	3.53943e+07	5.11145e+07	4.53536e+07	4.20596e+07	3.6062e+07	-0.149198	25.0921	-0.669136	0.504196	0.57374	-6.54339
Lysine degradation	1	1	1	1	1	1	1	1	1.40193e+06	852488	682158	1.11476e+06	2.71546e+06	2.71393e+06	2.37204e+06	2.28191e+06	-0.0164509	20.5791	-0.065124	0.948142	0.948142	-6.76224
Metabolic pathways	41	42	41	42	42	42	42	41	1.51811e+06	965015	1.13099e+06	981234	2.38996e+06	1.84289e+06	2.66914e+06	1.57056e+06	-0.499668	20.545	-1.95057	0.0525343	0.10605	-4.88682
Methane metabolism	5	5	5	5	5	5	5	5	1.4775e+06	1.62053e+06	2.22606e+06	1.56519e+06	1.4139e+06	1.45929e+06	1.35114e+06	1.40416e+06	-0.068433	20.5602	-0.268719	0.788429	0.813067	-6.7287
Microbial metabolism in diverse environments	26	27	26	27	27	27	27	26	2.13519e+06	1.38314e+06	1.64762e+06	1.38866e+06	3.30893e+06	2.58847e+06	3.6878e+06	2.25059e+06	-0.484957	21.0451	-2.35185	0.0196727	0.0649198	-4.03486
Nitrogen metabolism	1	1	1	1	1	1	1	1	123127	17919.9	44605.9	21644.6	183432	109840	228880	57956	-1.63629	16.0928	-3.03648	0.00271897	0.0163138	-2.21441
Nitrotoluene degradation	1	1	1	1	1	1	1	1	39310.5	2697.07	4092.48	1931.83	27316	13143.2	37379.3	5773.3	-2.17467	13.2099	-2.71722	0.00717264	0.0315596	-3.12089
Other glycan degradation	1	1	1	1	1	1	1	1	55897.3	6371.44	7579.69	9864.38	296342	36779.9	73967.6	96223.8	-1.34594	15.0795	-2.21248	0.028088	0.0740194	-4.34875
Oxidative phosphorylation	3	3	3	3	3	3	3	3	469318	419700	447037	435797	883080	587770	747501	429299	-0.396333	19.0204	-1.12942	0.2601	0.330127	-6.13487
Pantothenate and CoA biosynthesis	1	1	1	1	1	1	1	1	561419	126420	206376	164683	573947	297557	760014	297534	-1.19429	18.2578	-3.19765	0.00161561	0.0132223	-1.71862
Pentose and glucuronate interconversions	3	3	3	3	3	3	3	3	82166	53381.1	63119.4	64857.3	174561	111706	191390	116596	-0.485511	16.5651	-0.97783	0.329364	0.388179	-6.2925
Pentose phosphate pathway	6	6	6	6	6	6	6	6	658701	346931	390103	383947	1.16364e+06	865296	1.32267e+06	813886	-0.518966	19.3375	-1.53412	0.126612	0.18166	-5.60293
Phenylalanine metabolism	1	1	1	1	1	1	1	1	1.36151e+06	420528	666993	577733	2.48403e+06	1.87282e+06	2.89966e+06	1.78925e+06	-0.75155	20.2332	-2.55	0.0115368	0.0446773	-3.55555
Phenylalanine, tyrosine and tryptophan biosynthesis	1	1	1	1	1	1	1	1	223657	48539.5	106033	89777.8	281609	256948	310226	232147	-0.748658	17.3285	-1.86817	0.063231	0.115321	-5.04209
Photosynthesis	2	2	2	2	2	2	2	2	499372	228408	313852	291877	1.14566e+06	747442	1.06093e+06	478013	-0.749893	18.9586	-2.11958	0.0352996	0.080737	-4.54735
Propanoate metabolism	5	6	5	6	6	6	6	5	1.58858e+06	421235	609584	492213	2.4217e+06	1.44668e+06	2.11351e+06	1.30864e+06	-0.91461	20.0516	-2.90027	0.00415424	0.0210907	-2.61348
Protein processing in endoplasmic reticulum	1	1	1	1	1	1	1	1	553484	101987	151100	141211	590145	301529	1.02344e+06	221474	-1.4287	18.1404	-3.77189	0.000214488	0.0046737	0.256359
Purine metabolism	2	2	2	2	2	2	2	2	767519	286385	296564	290409	1.14668e+06	621135	1.4524e+06	592683	-0.907522	19.128	-2.62543	0.00933675	0.0385141	-3.36289
Pyrimidine metabolism	1	1	1	1	1	1	1	1	470395	193339	209643	224080	798847	514549	761845	493246	-0.612115	18.6109	-1.667	0.0971106	0.15294	-5.39303
Pyruvate metabolism	10	11	10	11	11	11	11	10	2.52081e+06	1.23347e+06	1.38754e+06	1.33167e+06	4.19928e+06	2.92536e+06	4.43395e+06	2.55279e+06	-0.602126	21.1368	-2.92406	0.00386189	0.0210907	-2.54509
Quorum sensing	3	3	3	3	3	3	3	3	912397	341519	458025	624629	795190	886501	1.34627e+06	849925	-0.369214	19.4569	-1.09731	0.273851	0.341023	-6.17015
Ribosome	14	14	14	14	14	14	14	14	1.24588e+06	950117	849677	964664	1.70996e+06	1.41353e+06	1.45488e+06	1.21663e+06	-0.185135	20.1883	-0.615939	0.538649	0.602557	-6.57712
RNA degradation	5	5	5	5	5	5	5	5	2.88602e+06	2.56957e+06	3.17459e+06	2.6426e+06	3.8391e+06	3.27302e+06	4.28085e+06	2.75049e+06	-0.32513	21.5776	-1.55374	0.121861	0.178729	-5.57305
RNA polymerase	1	1	1	1	1	1	1	1	470395	193339	209643	224080	798847	514549	761845	493246	-0.612115	18.6109	-1.667	0.0971106	0.15294	-5.39303
Salmonella infection	1	1	1	1	1	1	1	1	5.80909e+07	4.18385e+07	5.40019e+07	6.62074e+07	9.16588e+07	8.26695e+07	7.07001e+07	6.60768e+07	-0.106496	25.9476	-0.469309	0.639371	0.691778	-6.65565
Sphingolipid metabolism	1	1	1	1	1	1	1	1	55897.3	6371.44	7579.69	9864.38	296342	36779.9	73967.6	96223.8	-1.34594	15.0795	-2.21248	0.028088	0.0740194	-4.34875
Starch and sucrose metabolism	8	8	8	8	8	8	8	8	637333	253790	289316	319444	1.03358e+06	720217	1.35416e+06	571680	-0.737688	19.0742	-2.11753	0.0354754	0.080737	-4.55164
Streptomycin biosynthesis	1	1	1	1	1	1	1	1	1.06464e+06	379431	383485	356739	1.49451e+06	727722	2.14295e+06	692121	-1.06537	19.4956	-3.16419	0.00180304	0.0132223	-1.82367
Styrene degradation	1	1	1	1	1	1	1	1	20665.3	9385.16	12732.6	17028.4	43758.5	22566.5	72892.6	34455	-0.688947	14.541	-1.04461	0.297492	0.363601	-6.22586
Terpenoid backbone biosynthesis	2	2	2	2	2	2	2	2	1.29845e+06	811926	674716	856466	2.25133e+06	1.92549e+06	2.11844e+06	1.66124e+06	-0.227386	20.3336	-0.811506	0.41806	0.484069	-6.43937
Tryptophan metabolism	1	1	1	1	1	1	1	1	1.40193e+06	852488	682158	1.11476e+06	2.71546e+06	2.71393e+06	2.37204e+06	2.28191e+06	-0.0164509	20.5791	-0.065124	0.948142	0.948142	-6.76224
Tuberculosis	2	2	2	2	2	2	2	2	3.98401e+06	2.51119e+06	2.50974e+06	2.83925e+06	6.62838e+06	4.95453e+06	8.18944e+06	3.72242e+06	-0.511329	21.9469	-2.51058	0.0128617	0.0446773	-3.65397
Two-component system	8	9	8	9	9	9	9	9	7.65024e+06	4.87542e+06	6.99919e+06	7.62064e+06	1.07876e+07	9.69309e+06	8.44456e+06	7.7602e+06	-0.200881	22.8941	-0.978731	0.328919	0.388179	-6.29163
Valine, leucine and isoleucine biosynthesis	1	1	1	1	1	1	1	1	561419	126420	206376	164683	573947	297557	760014	297534	-1.19429	18.2578	-3.19765	0.00161561	0.0132223	-1.71862
Valine, leucine and isoleucine degradation	3	3	3	3	3	3	3	3	1.57126e+06	744484	775991	986566	3.06113e+06	2.84969e+06	3.06495e+06	1.95532e+06	-0.370739	20.6252	-1.49703	0.135994	0.183176	-5.65842
Vitamin B6 metabolism	1	1	1	1	1	1	1	1	665.413	20384.8	2124.7	20942.7	7350.68	18985.4	1056.15	11696.9	3.2691	12.4644	3.69688	0.000283255	0.0046737	-0.0201051
