# Supplementary material for: Increasing taxonomic and functional characterization of host-microbiome interactions by DIA-PASEF metaproteomics
Source: Front Microbiol. 2023 Oct 16;14:1258703. doi: 10.3389/fmicb.2023.1258703 (PMC10613666; doi:10.3389/fmicb.2023.1258703)
Supplement: Supplementary file 17 [file Table_10.XLSX]

## Sheet: SNI_Pre-D14_Host_comparison
ProteinGroup	Name	logFC (14D/Pre)	AveExpr	t	P.Value	adj.P.Val	B
P01675;P01676;P01677;P01678;P01679	Ig kappa chain V-VI region XRPC 44	-3.69173	14.439	6.36882	4e-06	0.00607427	2.96822
P03976	Ig kappa chain V-II region 17S29.1	3.00027	14.2312	-4.69256	0.000294392	0.223296	0.16169
P01636	Ig kappa chain V-V region MOPC 149	2.36973	14.6818	-4.1513	0.000500706	0.25319	-0.239418
P01843	Ig lambda-1 chain C region	2.37392	15.6156	-4.0236	0.000695945	0.263937	-0.421525
O70570	Polymeric immunoglobulin receptor (PIgR) (Poly-Ig receptor) [Cleaved into: Secretory component]	2.17644	19.8112	-3.5889	0.001715	0.32936	-1.162
P01633	Immunoglobulin kappa chain variable 6-17 (Ig kappa chain V-V region MPC11) (Ig kappa chain V19-17)	3.03111	19.4682	-3.87202	0.00148657	0.32936	-0.998766
P04945	Ig kappa chain V-VI region NQ2-6.1	1.87729	14.0367	-3.57591	0.00195401	0.32936	-1.25655
P14434;P14438	H-2 class II histocompatibility antigen, A-B alpha chain (IAalpha)	1.73636	12.9367	-3.61407	0.0017162	0.32936	-1.20158
P14483	H-2 class II histocompatibility antigen, A beta chain	1.78511	14.733	-3.57507	0.00187936	0.32936	-1.27286
P01642	Ig kappa chain V-V region L7	1.79854	18.2669	-3.32216	0.00321749	0.414053	-1.67333
P01746	Ig heavy chain V region 93G7	2.03238	16.29	-3.37625	0.00298006	0.414053	-1.63515
P62334	26S proteasome regulatory subunit 10B (26S proteasome AAA-ATPase subunit RPT4) (Proteasome 26S subunit ATPase 6) (Proteasome subunit p42)	-1.95018	11.0545	3.41403	0.0032753	0.414053	-1.87722
P07759;Q03734	Serine protease inhibitor A3K	1.74778	13.5579	-3.29638	0.00370212	0.432009	-1.77539
P01837	Immunoglobulin kappa constant (Ig kappa chain C region MOPC 21)	2.31717	18.4018	-3.29915	0.00445551	0.482787	-1.89649
Q8BV79	TPR and ankyrin repeat-containing protein 1 (Lupus brain antigen 1)	3.02611	12.7753	-3.26896	0.00478114	0.483533	-2.53589
P01878	Ig alpha chain C region	2.03201	19.8499	-3.10914	0.00564965	0.535657	-2.11874
P06330	Ig heavy chain V region AC38 205.12	2.65645	19.2922	-3.178	0.00701535	0.595623	-2.22993
Q64285	Bile salt-activated lipase (BAL) (EC 3.1.1.13) (EC 3.1.1.3) (EC 3.1.1.6) (Bile salt-stimulated lipase) (BSSL) (Carboxyl ester lipase) (Cholesterol esterase) (Pancreatic lysophospholipase) (Sterol esterase)	1.29229	13.8722	-2.98248	0.00706738	0.595623	-2.31209
P01592	Immunoglobulin J chain	2.16732	20.3042	-2.97633	0.00879289	0.661604	-2.44821
P01867	Immunoglobulin heavy constant gamma 2B (Ig gamma-2B chain C region)	1.25599	14.114	-2.85937	0.00934999	0.661604	-2.53854
P18526	Ig heavy chain V region 345	1.57317	13.7223	-2.86194	0.00959478	0.661604	-2.55477
P49183	Deoxyribonuclease-1 (EC 3.1.21.1) (Deoxyribonuclease I) (DNase I)	-1.68046	17.9117	2.86915	0.00914543	0.661604	-2.52066
P01639	Immunoglobulin kappa chain variable 9-120 (Ig kappa chain V-V region MOPC 41)	1.96012	15.1054	-2.90385	0.0108451	0.715307	-2.60554
Q8VCK7	Syncollin	1.23966	13.9623	-2.7643	0.0115786	0.731867	-2.71107
P01750	Ig heavy chain V region 102	2.29148	13.7834	-2.91894	0.0140663	0.778383	-2.75631
P04939;P11590;Q5FW60	Major urinary protein 3	-2.29026	13.507	2.82859	0.014367	0.778383	-2.87148
P56389	Cytidine deaminase (EC 3.5.4.5) (Cytidine aminohydrolase)	1.47117	12.7511	-2.72525	0.0130271	0.778383	-2.79381
Q63886	UDP-glucuronosyltransferase 1A1 (UGT1A1) (EC 2.4.1.17) (UDP-glucuronosyltransferase 1-1) (UDPGT 1-1) (UGT1*1) (UGT1-01) (UGT1.1) (UGTBR1)	-1.59671	13.2963	2.76373	0.01344	0.778383	-2.79635
P01632;P01634	Ig kappa chain V-I region S107A	2.27047	16.3601	-2.79568	0.0151042	0.781425	-2.84678
Q9Z331	Keratin, type II cytoskeletal 6B (Cytokeratin-6B) (CK-6B) (Keratin-6-beta) (mK6-beta) (Keratin-6B) (K6B)	1.84237	12.8976	-2.73954	0.0154534	0.781425	-2.9079
Q80T19	Hepcidin-2	-2.14409	13.4103	2.77631	0.0163406	0.799636	-2.91001
Q8K4D3	Proton-coupled amino acid transporter 1 (Proton/amino acid transporter 1) (Solute carrier family 36 member 1)	2.01092	9.25809	-2.62939	0.0180392	0.855173	-3.14928
P01634	Ig kappa chain V-V region MOPC 21	1.62224	16.2772	-2.54112	0.0193825	0.864802	-3.10449
P02816	Prolactin-inducible protein homolog (14 kDa submandibular gland protein) (SMGP) (Gross cystic disease fluid protein 15) (GCDFP-15) (Prolactin-induced protein)	-1.57465	20.3322	2.53291	0.0192932	0.864802	-3.12097
P01660	Ig kappa chain V-III region PC 3741/TEPC 111	2.51947	15.0198	-2.73369	0.0209213	0.8816	-3.0563
P14211	Calreticulin (CRP55) (Calregulin) (Endoplasmic reticulum resident protein 60) (ERp60) (HACBP)	-1.27693	15.4386	2.49729	0.0208423	0.8816	-3.18263
P01631	Ig kappa chain V-II region 26-10	1.5112	18.7882	-2.45061	0.0230487	0.884368	-3.26281
P28063	Proteasome subunit beta type-8 (EC 3.4.25.1) (Low molecular mass protein 7) (Macropain subunit C13) (Multicatalytic endopeptidase complex subunit C13) (Proteasome component C13) (Proteasome subunit beta-5i)	1.22375	13.4848	-2.42241	0.0244848	0.884368	-3.31089
P61022	Calcineurin B homologous protein 1 (Calcineurin B-like protein) (Calcium-binding protein CHP) (Calcium-binding protein p22) (EF-hand calcium-binding domain-containing protein p22) (Sid 470) (p24)	-1.13867	12.2243	2.48461	0.021877	0.884368	-3.19768
Q80TT2	BAI1-associated protein 3 (BAP3) (Brain-specific angiogenesis inhibitor I-associated protein 3) (Baiap3)	-1.35488	13.2871	2.46447	0.0233533	0.884368	-3.23684
Q9DBJ1	Phosphoglycerate mutase 1 (EC 5.4.2.11) (EC 5.4.2.4) (BPG-dependent PGAM 1) (Phosphoglycerate mutase isozyme B) (PGAM-B)	-2.36623	13.0663	2.48161	0.02446	0.884368	-3.41698
Q9Z0L8	Gamma-glutamyl hydrolase (EC 3.4.19.9) (Conjugase) (FGPH) (Folylpolyglutamate hydrolase) (GH) (Gamma-Glu-x carboxypeptidase)	-1.23144	16.43	2.44935	0.0231108	0.884368	-3.26495
Q9R1Q7	Proteolipid protein 2	2.16806	12.3741	-2.45962	0.0255659	0.901942	-3.44124
A2AKK5	Acyl-coenzyme A amino acid N-acyltransferase 1 (EC 2.3.1.-)	-1.09118	11.3225	2.39283	0.0265766	0.916288	-3.34805
P01680	Ig kappa chain V-IV region S107B	2.2806	17.7887	-2.45173	0.0314728	0.955329	-3.41465
P07759	Serine protease inhibitor A3K (Serpin A3K) (Contrapsin) (SPI-2)	1.25825	16.2242	-2.31712	0.0306121	0.955329	-3.48785
P18525;P18528	Ig heavy chain V region 5-84	1.58248	17.1145	-2.33792	0.0324884	0.955329	-3.50106
P41317	Mannose-binding protein C (MBP-C) (Mannan-binding protein) (RA-reactive factor P28A subunit) (RARF/P28A)	1.01079	12.9094	-2.32433	0.0301511	0.955329	-3.47586
P60335;Q61990	Poly(rC)-binding protein 1	1.66683	11.3028	-2.36495	0.0300857	0.955329	-3.46584
Q00898	Alpha-1-antitrypsin 1-5 (Alpha-1 protease inhibitor 5) (Serine protease inhibitor 1-5) (Serine protease inhibitor A1e) (Serpin A1e)	1.66725	13.1543	-2.37151	0.0322999	0.955329	-3.43949
Q9D311	Dual oxidase maturation factor 2	1.05897	14.1009	-2.30326	0.0315163	0.955329	-3.51083
Q9D9D5	Transmembrane and coiled-coil domain-containing protein 5A	-22.1524	13.1066	2.33547	0.0327469	0.955329	-4.56354
A2A863	Integrin beta-4 (CD antigen CD104)	-0.288004	14.0225	0.658501	0.517326	0.998783	-5.47253
A2AEP0	Odorant-binding protein 1b (Odorant-binding protein IB)	-0.709972	18.0138	0.93791	0.363043	0.998783	-5.26948
A2AJX4	MAM and LDL-receptor class A domain-containing protein 1	0.643574	13.7871	-1.48864	0.151353	0.998783	-4.70152
A2ASS6	Titin (EC 2.7.11.1) (Connectin)	-0.125051	13.8179	0.292045	0.7731	0.998783	-5.63155
A3KMP2	Tetratricopeptide repeat protein 38 (TPR repeat protein 38)	0.00328819	12.6112	-0.00576472	0.995463	0.998783	-5.44114
B1AQ75	Keratin, type I cuticular Ha6 (Keratin-36) (K36) (Keratin-5) (MHRa-1) (Type I keratin 48 kDa)	1.24446	13.7147	-2.03179	0.0570906	0.998783	-3.8719
B1AQ75;Q9D312	Keratin, type I cuticular Ha6	0.566353	13.5071	-0.827745	0.418575	0.998783	-5.09958
B1AVD1	Xaa-Pro aminopeptidase 2 (EC 3.4.11.9) (Membrane-bound aminopeptidase P) (Membrane-bound APP) (mAPP) (X-prolyl aminopeptidase 2)	0.208197	18.9158	-0.397262	0.695158	0.998783	-5.5982
B2RX12	ATP-binding cassette sub-family C member 3 (EC 7.6.2.-) (EC 7.6.2.2) (EC 7.6.2.3) (Canalicular multispecific organic anion transporter 2) (Multidrug resistance-associated protein 3)	0.714206	11.747	-0.845132	0.410395	0.998783	-4.8872
B2RXS4	Plexin-B2	-0.274966	13.9133	0.618526	0.542838	0.998783	-5.49566
B5X0G2;P11588;P11589	Major urinary protein 17	0.0254375	15.4603	-0.0139963	0.989315	0.998783	-5.67083
B5X0G2;P11588;P11589;P11591	Major urinary protein 17	0.0744125	18.5736	-0.0333817	0.974521	0.998783	-5.67035
B5X0G2;P11588;P11589;P11591;Q5FW60	Major urinary protein 17	0.412504	16.6977	-0.390981	0.704523	0.998783	-5.4334
D3YX43	V-set and immunoglobulin domain-containing protein 10	-0.485314	12.0116	0.943867	0.357004	0.998783	-5.10896
E9PV24	Fibrinogen alpha chain [Cleaved into: Fibrinopeptide A; Fibrinogen alpha chain]	0.303131	10.7327	-0.369981	0.716208	0.998783	-5.08008
E9PZQ0	Ryanodine receptor 1 (RYR-1) (RyR1) (Skeletal muscle calcium release channel) (Skeletal muscle ryanodine receptor) (Skeletal muscle-type ryanodine receptor) (Type 1 ryanodine receptor)	-0.808513	14.0744	0.850249	0.407627	0.998783	-4.88328
E9Q0N2	Receptor-type tyrosine-protein phosphatase H (R-PTP-H) (EC 3.1.3.48) (Stomach cancer-associated protein tyrosine phosphatase 1) (SAP-1)	0.442851	12.5358	-0.927809	0.364496	0.998783	-5.21026
E9Q3E1;Q80VQ0	Aldehyde dehydrogenase family 3 member B2	-0.881907	12.5077	1.93682	0.0662503	0.998783	-4.08878
E9Q401	Ryanodine receptor 2 (RYR-2) (RyR2) (Cardiac muscle ryanodine receptor) (Cardiac muscle ryanodine receptor-calcium release channel) (Type 2 ryanodine receptor)	0.558044	13.8527	-0.580236	0.569308	0.998783	-5.01296
E9Q414	Apolipoprotein B-100 (Apo B-100) [Cleaved into: Apolipoprotein B-48 (Apo B-48)]	0.208748	12.7551	-0.39025	0.700449	0.998783	-5.51952
E9Q557	Desmoplakin (DP)	-0.311687	13.0896	0.603593	0.553203	0.998783	-5.3848
E9Q634	Unconventional myosin-Ie (Unconventional myosin 1E)	-0.557615	11.7367	1.0252	0.318752	0.998783	-5.0037
E9Q7P9	Cadherin-related family member 2	0.644701	19.4403	-1.19348	0.245906	0.998783	-5.0355
O08528	Hexokinase-2 (EC 2.7.1.1) (Hexokinase type II) (HK II)	-0.681469	12.6962	0.87381	0.39826	0.998783	-5.06485
O08528;P17710		0.0755833	12.2482	-0.0872525	0.931545	0.998783	-5.12622
O08529	Calpain-2 catalytic subunit (EC 3.4.22.53) (80 kDa M-calpain subunit) (CALP80) (Calcium-activated neutral proteinase 2) (CANP 2) (Calpain M-type) (Calpain-2 large subunit) (Millimolar-calpain) (M-calpain)	-0.1156	11.6772	0.249184	0.805874	0.998783	-5.51837
O08553	Dihydropyrimidinase-related protein 2 (DRP-2) (Unc-33-like phosphoprotein 2) (ULIP-2)	-0.42993	13.1753	0.934458	0.360622	0.998783	-5.27591
O08553;P97427		0.434351	11.0555	-0.550824	0.589653	0.998783	-5.10086
O08553;P97427;Q62188		-0.288498	12.0744	0.694393	0.494999	0.998783	-5.4506
O08573	Galectin-9 (Gal-9)	-0.520017	12.9342	0.997124	0.331053	0.998783	-5.22169
O08601	Microsomal triglyceride transfer protein large subunit	0.308937	13.5539	-0.643155	0.527041	0.998783	-5.48158
O08638;Q61879		-0.14752	13.0038	0.315273	0.755646	0.998783	-5.62505
O08638;Q61879;Q6URW6;Q8VDD5		-0.288613	13.566	0.356477	0.725835	0.998783	-5.17871
O08638;Q6URW6;Q8VDD5		1.54432	12.3174	-2.09076	0.0517549	0.998783	-3.79793
O08638;Q8VDD5		-0.756714	12.5534	1.12163	0.281736	0.998783	-5.03425
O08688	Calpain-5 (EC 3.4.22.-) (New calpain 3) (nCL-3)	0.329616	12.8182	-0.557243	0.584174	0.998783	-5.30884
O08691	Arginase-2, mitochondrial (EC 3.5.3.1) (Arginase II) (Kidney-type arginase) (Non-hepatic arginase) (Type II arginase)	-0.324764	12.2902	0.574514	0.572678	0.998783	-5.2965
O08709	Peroxiredoxin-6 (EC 1.11.1.27) (1-Cys peroxiredoxin) (1-Cys PRX) (Acidic calcium-independent phospholipase A2) (aiPLA2) (EC 3.1.1.4) (Antioxidant protein 2) (Glutathione-dependent peroxiredoxin) (Lysophosphatidylcholine acyltransferase 5) (LPC acyltransferase 5) (LPCAT-5) (Lyso-PC acyltransferase 5) (EC 2.3.1.23) (Non-selenium glutathione peroxidase) (NSGPx)	0.575632	15.6137	-0.98953	0.334073	0.998783	-5.22879
O08734	Bcl-2 homologous antagonist/killer (Apoptosis regulator BAK)	0.175238	12.4278	-0.224051	0.825367	0.998783	-5.2077
O08749	Dihydrolipoyl dehydrogenase, mitochondrial (EC 1.8.1.4) (Dihydrolipoamide dehydrogenase)	-1.03047	15.8411	2.05374	0.0525798	0.998783	-3.91101
O08756	3-hydroxyacyl-CoA dehydrogenase type-2 (EC 1.1.1.35) (17-beta-estradiol 17-dehydrogenase) (EC 1.1.1.62) (2-methyl-3-hydroxybutyryl-CoA dehydrogenase) (MHBD) (3-alpha-(17-beta)-hydroxysteroid dehydrogenase (NAD(+))) (EC 1.1.1.239) (3-hydroxy-2-methylbutyryl-CoA dehydrogenase) (EC 1.1.1.178) (3-hydroxyacyl-CoA dehydrogenase type II) (3alpha(or 20beta)-hydroxysteroid dehydrogenase) (EC 1.1.1.53) (7-…	0.395397	11.6016	-0.760798	0.456051	0.998783	-5.23978
O08795	Glucosidase 2 subunit beta (80K-H protein) (Glucosidase II subunit beta) (Protein kinase C substrate 60.1 kDa protein heavy chain) (PKCSH)	-0.305077	13.4998	0.580802	0.567818	0.998783	-5.43688
O08807	Peroxiredoxin-4 (EC 1.11.1.24) (Antioxidant enzyme AOE372) (Peroxiredoxin IV) (Prx-IV) (Thioredoxin peroxidase AO372) (Thioredoxin-dependent peroxide reductase A0372) (Thioredoxin-dependent peroxiredoxin 4)	-0.0171324	13.6783	0.0262377	0.979432	0.998783	-5.54579
O08807;P35700		-0.357635	13.3612	0.686308	0.500347	0.998783	-5.38311
O08810	116 kDa U5 small nuclear ribonucleoprotein component (Elongation factor Tu GTP-binding domain-containing protein 2) (U5 snRNP-specific protein, 116 kDa) (U5-116 kDa)	0.905019	10.6472	-1.10458	0.285543	0.998783	-4.72345
O08810;P58252		-0.27216	14.0951	0.605896	0.551036	0.998783	-5.50268
O08832	Polypeptide N-acetylgalactosaminyltransferase 4 (EC 2.4.1.41) (Polypeptide GalNAc transferase 4) (GalNAc-T4) (pp-GaNTase 4) (Protein-UDP acetylgalactosaminyltransferase 4) (UDP-GalNAc:polypeptide N-acetylgalactosaminyltransferase 4)	-0.106485	11.9636	0.199158	0.844355	0.998783	-5.42411
O08992	Syntenin-1 (Scaffold protein Pbp1) (Syndecan-binding protein 1)	0.214393	12.5335	-0.381537	0.707009	0.998783	-5.42547
O09037	Regenerating islet-derived protein 3-alpha (REG-3-alpha) (Islet of Langerhans regenerating protein 3) (Lithostathine 3) (Pancreatitis-associated protein 2) (Regenerating islet-derived protein III-alpha) (Reg III-alpha) [Cleaved into: Regenerating islet-derived protein 3-alpha 16.5 kDa form; Regenerating islet-derived protein 3-alpha 15 kDa form]	0.0434843	15.2597	-0.0826937	0.934873	0.998783	-5.66777
O09043	Napsin-A (EC 3.4.23.-) (KDAP-1) (Kidney-derived aspartic protease-like protein) (KAP)	-0.566622	14.5704	0.852362	0.407075	0.998783	-5.18819
O09044	Synaptosomal-associated protein 23 (SNAP-23) (Syndet) (Vesicle-membrane fusion protein SNAP-23)	0.183669	11.9021	-0.346876	0.732677	0.998783	-5.38529
O09049	Regenerating islet-derived protein 3-gamma (REG-3-gamma) (Pancreatitis-associated protein 3) (Regenerating islet-derived protein III-gamma) (Reg III-gamma) [Cleaved into: Regenerating islet-derived protein 3-gamma 16.5 kDa form; Regenerating islet-derived protein 3-gamma 15 kDa form]	-0.0668133	20.2837	0.115279	0.909312	0.998783	-5.66478
O09061	Proteasome subunit beta type-1 (Macropain subunit C5) (Multicatalytic endopeptidase complex subunit C5) (Proteasome component C5) (Proteasome gamma chain)	0.621798	13.7312	-1.2321	0.231445	0.998783	-4.9953
O09117	Synaptophysin-like protein 1 (Pantophysin)	0.114193	14.3556	-0.250975	0.804257	0.998783	-5.64183
O09131	Glutathione S-transferase omega-1 (GSTO-1) (EC 2.5.1.18) (Glutathione S-transferase omega 1-1) (GSTO 1-1) (Glutathione-dependent dehydroascorbate reductase) (EC 1.8.5.1) (Monomethylarsonic acid reductase) (MMA(V) reductase) (EC 1.20.4.2) (S-(Phenacyl)glutathione reductase) (SPG-R) (p28)	0.134175	13.3746	-0.175831	0.863346	0.998783	-5.57376
O09159	Lysosomal alpha-mannosidase (Laman) (EC 3.2.1.24) (Lysosomal acid alpha-mannosidase) (Mannosidase alpha class 2B member 1) (Mannosidase alpha-B)	0.243467	14.5602	-0.534747	0.598406	0.998783	-5.53959
O35054	Claudin-4 (Clostridium perfringens enterotoxin receptor) (CPE-R) (CPE-receptor)	0.252038	14.0913	-0.502091	0.620794	0.998783	-5.55504
O35129	Prohibitin-2 (B-cell receptor-associated protein BAP37) (Repressor of estrogen receptor activity)	0.079977	13.5943	-0.141667	0.888824	0.998783	-5.53713
O35143	ATPase inhibitor, mitochondrial (ATP synthase F1 subunit epsilon) (Inhibitor of F(1)F(o)-ATPase) (IF(1)) (IF1)	0.235545	13.7086	-0.349348	0.731562	0.998783	-5.39346
O35215	D-dopachrome decarboxylase (EC 4.1.1.84) (D-dopachrome tautomerase)	-0.039572	12.8829	0.0889851	0.929932	0.998783	-5.66727
O35292	Ribonuclease 2B (EC 4.6.1.18) (Eosinophil cationic-type ribonuclease 5) (MR-5)	1.84856	12.9124	-1.96805	0.0664933	0.998783	-3.96554
O35295	Transcriptional activator protein Pur-beta (Purine-rich element-binding protein B) (Vascular actin single-stranded DNA-binding factor 2 p44 component)	-0.906778	12.1268	0.717438	0.495869	0.998783	-5.02529
O35350	Calpain-1 catalytic subunit (EC 3.4.22.52) (Calcium-activated neutral proteinase 1) (CANP 1) (Calpain mu-type) (Calpain-1 large subunit) (Micromolar-calpain) (muCANP)	-0.357703	13.5453	0.67423	0.508088	0.998783	-5.46247
O35405	5'-3' exonuclease PLD3 (EC 3.1.16.1) (Choline phosphatase 3) (Phosphatidylcholine-hydrolyzing phospholipase D3) (Phospholipase D3) (PLD 3) (Schwannoma-associated protein 9) (SAM-9)	0.29268	12.3509	-0.336963	0.740237	0.998783	-5.08824
O35459	Delta(3,5)-Delta(2,4)-dienoyl-CoA isomerase, mitochondrial (EC 5.3.3.-)	-0.145287	11.6724	0.250775	0.804971	0.998783	-5.35308
O35598	Disintegrin and metalloproteinase domain-containing protein 10 (ADAM 10) (EC 3.4.24.81) (Kuzbanian protein homolog) (Mammalian disintegrin-metalloprotease) (CD antigen CD156c)	-0.287731	14.5482	0.637371	0.530728	0.998783	-5.48493
O35604	NPC intracellular cholesterol transporter 1 (Niemann-Pick C1 protein)	0.573511	16.2655	-0.790564	0.439415	0.998783	-5.17751
O35639	Annexin A3 (35-alpha calcimedin) (Annexin III) (Annexin-3) (Lipocortin III) (Placental anticoagulant protein III) (PAP-III)	-0.109903	15.4427	0.21901	0.828744	0.998783	-5.64876
O35640	Annexin A8 (Annexin VIII) (Annexin-8)	-0.091113	12.2208	0.191924	0.849824	0.998783	-5.52964
O35643	AP-1 complex subunit beta-1 (Adaptor protein complex AP-1 subunit beta-1) (Adaptor-related protein complex 1 subunit beta-1) (Beta-1-adaptin) (Beta-adaptin 1) (Clathrin assembly protein complex 1 beta large chain) (Golgi adaptor HA1/AP1 adaptin beta subunit)	-0.28633	12.1972	0.331123	0.744813	0.998783	-5.08946
O35643;Q9DBG3		-0.381783	12.819	0.76316	0.453918	0.998783	-5.40538
O35657	Sialidase-1 (EC 3.2.1.18) (G9 sialidase) (Lysosomal sialidase) (N-acetyl-alpha-neuraminidase 1)	0.561535	11.6724	-0.889519	0.388915	0.998783	-5.15335
O35658	Complement component 1 Q subcomponent-binding protein, mitochondrial (GC1q-R protein) (Glycoprotein gC1qBP) (C1qBP)	0.162983	13.056	-0.354847	0.72622	0.998783	-5.61286
O35682	Myeloid-associated differentiation marker (Myeloid up-regulated protein)	1.15849	10.9098	-1.4123	0.176857	0.998783	-4.48651
O35684	Neuroserpin (Peptidase inhibitor 12) (PI-12) (Serine protease inhibitor 17) (Serpin I1)	0.428873	12.9046	-0.985241	0.335651	0.998783	-5.2329
O35855	Branched-chain-amino-acid aminotransferase, mitochondrial (BCAT(m)) (EC 2.6.1.42)	-0.455673	12.1356	0.991132	0.333383	0.998783	-5.15792
O35857	Mitochondrial import inner membrane translocase subunit TIM44	-0.0592258	11.4198	0.0806598	0.936647	0.998783	-5.22477
O35945;P24549	Aldehyde dehydrogenase, cytosolic 1 (EC 1.2.1.3) (ALDH class 1) (ALDH-E1) (ALHDII) (Aldehyde dehydrogenase family 1 member A7) (Aldehyde dehydrogenase phenobarbital-inducible)	-0.33263	13.6625	0.5884	0.564072	0.998783	-5.51071
O35955	Proteasome subunit beta type-10 (EC 3.4.25.1) (Low molecular mass protein 10) (Macropain subunit MECl-1) (Multicatalytic endopeptidase complex subunit MECl-1) (Proteasome MECl-1) (Proteasome subunit beta-2i)	-0.111417	13.0771	0.221255	0.827122	0.998783	-5.56605
O54734	Dolichyl-diphosphooligosaccharide--protein glycosyltransferase 48 kDa subunit (DDOST 48 kDa subunit) (Oligosaccharyl transferase 48 kDa subunit)	-0.55439	13.568	1.17877	0.251593	0.998783	-5.05053
O54782	Epididymis-specific alpha-mannosidase (EC 3.2.1.24) (Mannosidase alpha class 2B member 2)	-0.39033	12.5189	0.434683	0.66955	0.998783	-5.06221
O54909	Retinol dehydrogenase 16 (EC 1.1.1.105) (EC 1.1.1.209) (EC 1.1.1.315) (EC 1.1.1.53) (Cis-retinol androgen dehydrogenase 1)	-1.09966	12.1615	1.25839	0.22921	0.998783	-4.64638
O54962	Barrier-to-autointegration factor (LAP2-binding protein 1) [Cleaved into: Barrier-to-autointegration factor, N-terminally processed]	0.00689485	10.6029	-0.0125352	0.990136	0.998783	-5.3793
O54990	Prominin-1 (Antigen AC133 homolog) (Prominin-like protein 1) (CD antigen CD133)	-0.377835	14.0152	0.8158	0.423714	0.998783	-5.36825
O55023	Inositol monophosphatase 1 (IMP 1) (IMPase 1) (EC 3.1.3.25) (D-galactose 1-phosphate phosphatase) (EC 3.1.3.94) (Inositol-1(or 4)-monophosphatase 1) (Lithium-sensitive myo-inositol monophosphatase A1)	0.209203	13.7777	-0.433163	0.669285	0.998783	-5.58453
O55029	Coatomer subunit beta' (Beta'-coat protein) (Beta'-COP) (p102)	-0.35798	13.4847	0.765291	0.45256	0.998783	-5.40402
O55111	Desmoglein-2	0.365455	12.387	-0.534583	0.601637	0.998783	-5.36963
O55125	Protein NipSnap homolog 1 (NipSnap1)	1.39419	12.6485	-1.55999	0.15558	0.998783	-4.48767
O55126	Protein NipSnap homolog 2 (NipSnap2) (Glioblastoma-amplified sequence)	-0.340626	12.158	0.699895	0.492001	0.998783	-5.36939
O55135	Eukaryotic translation initiation factor 6 (eIF-6) (B4 integrin interactor) (CAB) (p27(BBP))	-0.269937	13.5651	0.56671	0.576881	0.998783	-5.52356
O55142	60S ribosomal protein L35a	-0.199217	13.741	0.434652	0.668221	0.998783	-5.58394
O55143	Sarcoplasmic/endoplasmic reticulum calcium ATPase 2 (SERCA2) (SR Ca(2+)-ATPase 2) (EC 7.2.2.10) (Calcium pump 2) (Calcium-transporting ATPase sarcoplasmic reticulum type, slow twitch skeletal muscle isoform) (Endoplasmic reticulum class 1/2 Ca(2+) ATPase)	-0.0976513	13.5786	0.162466	0.872736	0.998783	-5.42981
O55143;Q64518		0.166616	11.1261	-0.315575	0.756308	0.998783	-5.50132
O55143;Q64518;Q8R429		0.309538	12.1855	-0.768982	0.450413	0.998783	-5.40148
O55143;Q8R429		-0.233719	14.1711	0.549302	0.588556	0.998783	-5.5324
O55234	Proteasome subunit beta type-5 (EC 3.4.25.1) (Macropain epsilon chain) (Multicatalytic endopeptidase complex epsilon chain) (Proteasome chain 6) (Proteasome epsilon chain) (Proteasome subunit X)	0.69334	13.8086	-1.30806	0.20559	0.998783	-4.84882
O55242	Sigma non-opioid intracellular receptor 1 (Sigma 1-type opioid receptor) (Sigma1-receptor) (Sigma1R)	1.38062	13.7664	-1.44772	0.166847	0.998783	-4.45655
O70228	Probable phospholipid-transporting ATPase IIA (EC 7.6.2.1) (ATPase class II type 9A)	0.272791	11.9773	-0.319324	0.753578	0.998783	-5.0921
O70251	Elongation factor 1-beta (EF-1-beta)	0.12978	13.1983	-0.134798	0.894439	0.998783	-5.12111
O70325	Phospholipid hydroperoxide glutathione peroxidase (PHGPx) (EC 1.11.1.12) (Glutathione peroxidase 4) (GPx-4) (GSHPx-4)	-0.0297065	12.6449	0.0695262	0.945224	0.998783	-5.66869
O70370	Cathepsin S (EC 3.4.22.27)	0.0310288	16.3604	-0.0568435	0.955204	0.998783	-5.66944
O70435	Proteasome subunit alpha type-3 (Macropain subunit C8) (Multicatalytic endopeptidase complex subunit C8) (Proteasome component C8) (Proteasome subunit K)	0.127225	13.9924	-0.265974	0.792837	0.998783	-5.63826
O70456	14-3-3 protein sigma (Stratifin)	-0.0715693	13.7204	0.134015	0.89479	0.998783	-5.53807
O70456;P61982;P62259;P63101;P68254;P68510;Q9CQV8		0.128718	15.0202	-0.273874	0.78684	0.998783	-5.63629
O70456;P61982;P63101;P68510		0.496195	13.9883	-0.611143	0.549127	0.998783	-5.0869
O70475	UDP-glucose 6-dehydrogenase (UDP-Glc dehydrogenase) (UDP-GlcDH) (UDPGDH) (EC 1.1.1.22)	-0.0367453	13.8319	0.0680838	0.946453	0.998783	-5.66877
O70503	Very-long-chain 3-oxoacyl-CoA reductase (EC 1.1.1.330) (17-beta-hydroxysteroid dehydrogenase 12) (17-beta-HSD 12) (3-ketoacyl-CoA reductase) (KAR) (Estradiol 17-beta-dehydrogenase 12) (EC 1.1.1.62) (KIK-I)	-0.370899	13.3726	0.81865	0.422121	0.998783	-5.36617
O88310	Intelectin-1a (Galactofuranose-binding lectin) (Intestinal lactoferrin receptor)	0.981862	19.8949	-1.6539	0.112924	0.998783	-4.48926
O88310;Q80ZA0		0.297059	20.5823	-0.529187	0.60219	0.998783	-5.54229
O88312	Anterior gradient protein 2 homolog (AG-2) (mAG-2) (Protein Gob-4) (Secreted cement gland protein XAG-2 homolog)	-0.254495	14.8639	0.40002	0.694481	0.998783	-5.59619
O88329	Unconventional myosin-Ia (Brush border myosin I) (BBM-I) (BBMI) (Myosin I heavy chain) (MIHC)	0.309712	15.049	-0.554368	0.585636	0.998783	-5.52941
O88329;P46735		0.231022	13.1217	-0.364803	0.720314	0.998783	-5.60854
O88329;Q9WTI7		0.505257	12.0898	-0.937637	0.360752	0.998783	-5.07326
O88342	WD repeat-containing protein 1 (Actin-interacting protein 1) (AIP1)	-0.0813897	15.0229	0.167695	0.868418	0.998783	-5.65793
O88343	Electrogenic sodium bicarbonate cotransporter 1 (Sodium bicarbonate cotransporter) (Na(+)/HCO3(-) cotransporter) (Solute carrier family 4 member 4)	-0.90899	12.3984	1.65189	0.114874	0.998783	-4.3843
O88346	Troponin T, slow skeletal muscle (TnTs) (Slow skeletal muscle troponin T) (sTnT)	0.00786961	11.743	-0.016992	0.98661	0.998783	-5.59133
O88428	Bifunctional 3'-phosphoadenosine 5'-phosphosulfate synthase 2 (PAPS synthase 2) (PAPSS 2) (Sulfurylase kinase 2) (SK 2) (SK2) [Includes: Sulfate adenylyltransferase (EC 2.7.7.4) (ATP-sulfurylase) (Sulfate adenylate transferase) (SAT); Adenylyl-sulfate kinase (EC 2.7.1.25) (3'-phosphoadenosine-5'-phosphosulfate synthase) (APS kinase) (Adenosine-5'-phosphosulfate 3'-phosphotransferase) (Adenylylsul…	-0.445151	13.1776	0.756865	0.459975	0.998783	-5.4074
O88455	7-dehydrocholesterol reductase (7-DHC reductase) (EC 1.3.1.21) (Sterol Delta(7)-reductase)	0.0485326	12.1626	-0.057721	0.955179	0.998783	-5.48743
O88456	Calpain small subunit 1 (CSS1) (Calcium-activated neutral proteinase small subunit) (CANP small subunit) (Calcium-dependent protease small subunit) (CDPS) (Calcium-dependent protease small subunit 1) (Calpain regulatory subunit)	-0.0222143	13.4337	0.0434126	0.96578	0.998783	-5.67006
O88531	Palmitoyl-protein thioesterase 1 (PPT-1) (EC 3.1.2.22) (Palmitoyl-protein hydrolase 1)	-0.0096675	12.704	0.0222676	0.982443	0.998783	-5.6707
O88533	Aromatic-L-amino-acid decarboxylase (AADC) (EC 4.1.1.28) (DOPA decarboxylase) (DDC)	-0.0561795	13.6127	0.119374	0.906106	0.998783	-5.66434
O88569	Heterogeneous nuclear ribonucleoproteins A2/B1 (hnRNP A2/B1)	-0.615276	12.4088	1.03725	0.313252	0.998783	-4.99397
O88593	Peptidoglycan recognition protein 1 (Cytokine tag7) (Peptidoglycan recognition protein short) (PGRP-S)	0.922999	17.5507	-1.67882	0.107912	0.998783	-4.45581
O88627	Sodium/nucleoside cotransporter 2 (Concentrative nucleoside transporter 2) (CNT 2) (Na(+)/nucleoside cotransporter 2) (Sodium-coupled nucleoside transporter 2) (Sodium/purine nucleoside cotransporter) (SPNT) (Solute carrier family 28 member 2)	-0.113109	13.8156	0.200977	0.843123	0.998783	-5.65205
O88696	ATP-dependent Clp protease proteolytic subunit, mitochondrial (EC 3.4.21.92) (Endopeptidase Clp)	0.416743	13.9554	-0.698619	0.493653	0.998783	-5.22836
O88792	Junctional adhesion molecule A (JAM-A) (Junctional adhesion molecule 1) (JAM-1) (CD antigen CD321)	0.279261	16.2993	-0.556066	0.584005	0.998783	-5.529
O88844	Isocitrate dehydrogenase [NADP] cytoplasmic (IDH) (IDH1) (EC 1.1.1.42) (Cytosolic NADP-isocitrate dehydrogenase) (IDPc) (NADP(+)-specific ICDH) (Oxalosuccinate decarboxylase)	-0.006651	13.3664	0.0149324	0.988226	0.998783	-5.67083
O88952	Protein lin-7 homolog C (Lin-7C) (mLin7C) (Mammalian lin-seven protein 3) (MALS-3) (Vertebrate lin-7 homolog 3) (Veli-3)	0.80304	12.2754	-0.923992	0.369103	0.998783	-4.84161
O88968	Transcobalamin-2 (TC-2) (Transcobalamin II) (TC II) (TCII)	0.438217	12.4538	-0.970654	0.342699	0.998783	-5.24547
O89001	Carboxypeptidase D (EC 3.4.17.22) (Metallocarboxypeptidase D) (gp180)	-0.123791	12.1246	0.145264	0.886198	0.998783	-5.12012
P00015	Cytochrome c, testis-specific	0.17848	11.271	-0.42566	0.674659	0.998783	-5.58748
P00158	Cytochrome b (Complex III subunit 3) (Complex III subunit III) (Cytochrome b-c1 complex subunit 3) (Ubiquinol-cytochrome-c reductase complex cytochrome b subunit)	-0.181493	13.9242	0.375263	0.711205	0.998783	-5.60601
P00329	Alcohol dehydrogenase 1 (EC 1.1.1.1) (ADH-A2) (Alcohol dehydrogenase A subunit)	0.671294	14.5275	-1.35968	0.188263	0.998783	-4.85487
P00405	Cytochrome c oxidase subunit 2 (EC 7.1.1.9) (Cytochrome c oxidase polypeptide II)	-0.435728	17.321	0.642734	0.529362	0.998783	-5.47987
P00493	Hypoxanthine-guanine phosphoribosyltransferase (HGPRT) (HGPRTase) (EC 2.4.2.8) (HPRT B)	-0.0834333	11.9363	0.141258	0.889313	0.998783	-5.37101
P00683	Ribonuclease pancreatic (EC 4.6.1.18) (RNase 1) (RNase A)	0.657029	12.1788	-0.928788	0.367957	0.998783	-5.02755
P00687	Alpha-amylase 1 (EC 3.2.1.1) (1,4-alpha-D-glucan glucanohydrolase 1) (Salivary and hepatic alpha-amylase)	-0.931853	16.0564	1.22024	0.242	0.998783	-5.0053
P00687;P00688		-1.40759	19.8233	0.869042	0.41745	0.998783	-5.30754
P00688	Pancreatic alpha-amylase 2a5 (PA) (EC 3.2.1.1) (1,4-alpha-D-glucan glucanohydrolase)	-1.49486	19.2923	0.711149	0.50534	0.998783	-5.42026
P00920	Carbonic anhydrase 2 (EC 4.2.1.1) (Carbonate dehydratase II) (Carbonic anhydrase II) (CA-II)	-0.139223	15.3981	0.209984	0.836215	0.998783	-5.52626
P01027	Complement C3 (HSE-MSF) [Cleaved into: Complement C3 beta chain; C3-beta-c (C3bc); Complement C3 alpha chain; C3a anaphylatoxin; Acylation stimulating protein (ASP) (C3adesArg); Complement C3b alpha' chain; Complement C3c alpha' chain fragment 1; Complement C3dg fragment; Complement C3g fragment; Complement C3d fragment; Complement C3f fragment; Complement C3c alpha' chain fragment 2]	0.55996	14.4524	-1.13855	0.267633	0.998783	-5.09078
P01630	Ig kappa chain V-II region 7S34.1	1.34251	16.2081	-1.91197	0.0738839	0.998783	-4.10402
P01635	Immunoglobulin kappa chain variable 12-41 (Ig kappa chain V-V region K2)	2.14652	17.5769	-1.71434	0.127485	0.998783	-4.45535
P01638	Ig kappa chain V-V region L6	1.14455	16.4554	-0.731337	0.491868	0.998783	-5.40842
P01646	Ig kappa chain V-V region HP 123E6	1.50731	14.9749	-2.15719	0.0439128	0.998783	-3.6855
P01646;P01647		2.03628	16.131	-2.2725	0.0433207	0.998783	-3.67267
P01647	Ig kappa chain V-V region HP 124E1	1.08084	16.4933	-1.12264	0.276235	0.998783	-4.77025
P01654;P01656	Ig kappa chain V-III region PC 2880/PC 1229	-0.243669	14.5104	0.443321	0.66226	0.998783	-5.50533
P01671	Ig kappa chain V-III region PC 7175	2.35113	12.9612	-1.68822	0.132888	0.998783	-4.28282
P01674	Ig kappa chain V-III region PC 2154	1.85583	14.0493	-2.29624	0.043587	0.998783	-3.63536
P01750;P06330		1.37549	15.1631	-2.00307	0.0603479	0.998783	-3.89828
P01754;P06328	Ig heavy chain V region 1-62-3 (Ig heavy chain V region 145)	0.987236	17.7681	-1.66345	0.111711	0.998783	-4.42841
P01786	Ig heavy chain V region MOPC 47A	1.25512	12.4125	-1.93337	0.074621	0.998783	-4.0888
P01787;P01788;P01790;P01791;P01794	Ig heavy chain V regions TEPC 15/S107/HPCM1/HPCM2/HPCM3	0.2545	14.0304	-0.127209	0.905459	0.998783	-5.48761
P01796;P01797;P01799;P01801	Ig heavy chain V-III region A4	0.709952	15.7729	-1.22681	0.233386	0.998783	-5.00087
P01803;P01804	Ig heavy chain V region AMPC1	1.03809	14.3471	-1.96092	0.0643444	0.998783	-4.05864
P01804	Ig heavy chain V-III region HPC76	-0.709109	14.347	0.669337	0.5224	0.998783	-5.29841
P01806;P01807;P01808	Ig heavy chain V region 441	-1.14977	15.3955	1.21787	0.251018	0.998783	-5.00442
P01810	Ig heavy chain V region J539	0.383997	16.6151	-0.303645	0.769793	0.998783	-5.62498
P01845	Ig lambda-3 chain C region	1.44614	11.5967	-1.9329	0.0690184	0.998783	-3.97618
P01868;P01869	Ig gamma-1 chain C region secreted form	-0.0556175	12.6993	0.083781	0.934387	0.998783	-5.48649
P01887	Beta-2-microglobulin	-0.382658	14.3991	0.754307	0.458987	0.998783	-5.41152
P01898;P01899		-0.132611	14.0928	0.264738	0.793903	0.998783	-5.55952
P01898;P01899;P01901;P04223		-0.404803	13.6739	0.841326	0.409584	0.998783	-5.34937
P01899	H-2 class I histocompatibility antigen, D-B alpha chain (H-2D(B))	0.012985	14.1446	-0.0291664	0.977006	0.998783	-5.67054
P01901	H-2 class I histocompatibility antigen, K-B alpha chain (H-2K(B))	0.346008	11.6976	-0.416407	0.682281	0.998783	-5.06772
P01901;P04223		0.347206	13.6022	-0.709818	0.485575	0.998783	-5.44083
P01942	Hemoglobin subunit alpha (Alpha-globin) (Hemoglobin alpha chain) [Cleaved into: Hemopressin]	0.397589	16.7164	-0.663401	0.514598	0.998783	-5.39134
P02088	Hemoglobin subunit beta-1 (Beta-1-globin) (Hemoglobin beta-1 chain) (Hemoglobin beta-major chain)	0.050955	17.3001	-0.0932294	0.926599	0.998783	-5.66691
P02301;P68433;P84228;P84244	Histone H3.3C (Embryonic)	0.254071	18.1073	-0.497615	0.623894	0.998783	-5.55709
P02535	Keratin, type I cytoskeletal 10 (56 kDa cytokeratin) (Cytokeratin-10) (CK-10) (Keratin, type I cytoskeletal 59 kDa) (Keratin-10) (K10)	-0.264406	17.0507	0.419643	0.679579	0.998783	-5.58935
P02535;P08730		0.331897	13.973	-0.576503	0.571324	0.998783	-5.4385
P02535;Q61414;Q61781;Q9Z2K1;Q9Z320		-0.391036	17.6703	0.543114	0.594608	0.998783	-5.53379
P03958	Adenosine deaminase (EC 3.5.4.4) (Adenosine aminohydrolase)	-1.43933	13.6191	2.05278	0.0608151	0.998783	-3.96472
P03977	Ig kappa chain V-III region 50S10.1	-0.157267	13.6245	0.211388	0.836059	0.998783	-5.57315
P04104	Keratin, type II cytoskeletal 1 (67 kDa cytokeratin) (Cytokeratin-1) (CK-1) (Keratin-1) (K1) (Type-II keratin Kb1)	0.159067	15.6497	-0.251472	0.80449	0.998783	-5.64139
P04104;P07744;P11679;P50446;Q3TTY5;Q3UV17;Q6IFZ6;Q6IFZ9;Q6IME9;Q6NXH9;Q8VED5;Q922U2;Q99M73;Q9DCV7;Q9R0H5;Q9Z331		0.17987	15.1536	-0.28753	0.777344	0.998783	-5.63226
P04444	Hemoglobin subunit beta-H1 (Beta-H1-globin) (Hemoglobin beta-H1 chain) (Protein Z)	0.318381	12.8937	-0.497632	0.626032	0.998783	-5.47839
P04939	Major urinary protein 3 (MUP 3) (Non-group 1/group 2 MUP15)	-0.143454	15.7947	0.144834	0.887806	0.998783	-5.49388
P04939;P11590		-0.716764	14.97	1.4003	0.175932	0.998783	-4.80777
P05064	Fructose-bisphosphate aldolase A (EC 4.1.2.13) (Aldolase 1) (Muscle-type aldolase)	-0.169284	14.8049	0.344358	0.73398	0.998783	-5.61623
P05201	Aspartate aminotransferase, cytoplasmic (cAspAT) (EC 2.6.1.1) (EC 2.6.1.3) (Cysteine aminotransferase, cytoplasmic) (Cysteine transaminase, cytoplasmic) (cCAT) (Glutamate oxaloacetate transaminase 1) (Transaminase A)	-0.797034	14.1766	1.6511	0.113501	0.998783	-4.493
P05202	Aspartate aminotransferase, mitochondrial (mAspAT) (EC 2.6.1.1) (EC 2.6.1.7) (Fatty acid-binding protein) (FABP-1) (Glutamate oxaloacetate transaminase 2) (Kynurenine aminotransferase 4) (Kynurenine aminotransferase IV) (Kynurenine--oxoglutarate transaminase 4) (Kynurenine--oxoglutarate transaminase IV) (Plasma membrane-associated fatty acid-binding protein) (FABPpm) (Transaminase A)	-0.403077	15.4489	0.817362	0.42284	0.998783	-5.36711
P05208	Chymotrypsin-like elastase family member 2A (EC 3.4.21.71) (Elastase-2) (Elastase-2A)	-0.557107	20.4984	0.508048	0.622355	0.998783	-5.54733
P05366	Serum amyloid A-1 protein	0.427969	11.3064	-0.73059	0.474901	0.998783	-5.15988
P05480	Proto-oncogene tyrosine-protein kinase Src (EC 2.7.10.2) (Proto-oncogene c-Src) (pp60c-src) (p60-Src)	0.491479	12.5703	-0.543798	0.594015	0.998783	-5.0258
P05784	Keratin, type I cytoskeletal 18 (Cytokeratin endo B) (Keratin D) (Cytokeratin-18) (CK-18) (Keratin-18) (K18)	0.494247	14.1232	-0.574607	0.576734	0.998783	-5.23964
P05784;P08730;P19001;Q61414;Q9QWL7		-0.0292475	17.475	0.0487674	0.961563	0.998783	-5.66983
P05784;P19001		0.610415	15.9708	-1.00825	0.325594	0.998783	-5.21207
P05977	Myosin light chain 1/3, skeletal muscle isoform (MLC1/MLC3) (MLC1F/MLC3F) (Myosin light chain alkali 1/2) (Myosin light chain A1/A2)	-0.379773	12.657	0.810945	0.426879	0.998783	-5.29878
P06151	L-lactate dehydrogenase A chain (LDH-A) (EC 1.1.1.27) (LDH muscle subunit) (LDH-M)	-0.435056	16.7353	0.569261	0.577959	0.998783	-5.51969
P06151;P16125		-0.250827	16.6258	0.385652	0.704465	0.998783	-5.60174
P06327	Ig heavy chain V region VH558 A1/A4	0.610098	11.232	-0.83996	0.411868	0.998783	-4.96598
P06745	Glucose-6-phosphate isomerase (GPI) (EC 5.3.1.9) (Autocrine motility factor) (AMF) (Neuroleukin) (NLK) (Phosphoglucose isomerase) (PGI) (Phosphohexose isomerase) (PHI)	-0.217578	13.9796	0.361377	0.72259	0.998783	-5.60987
P06797	Procathepsin L (EC 3.4.22.15) (Cathepsin L1) (Major excreted protein) (MEP) (p39 cysteine proteinase) [Cleaved into: Cathepsin L; Cathepsin L heavy chain; Cathepsin L light chain]	-0.19574	11.2546	0.489599	0.629461	0.998783	-5.5607
P07146	Anionic trypsin-2 (EC 3.4.21.4) (Anionic trypsin II) (Pretrypsinogen II) (Serine protease 2)	-0.742511	21.7216	1.21316	0.238452	0.998783	-5.01515
P07309	Transthyretin (Prealbumin)	0.563645	18.0178	-0.811331	0.428911	0.998783	-5.36896
P07310	Creatine kinase M-type (EC 2.7.3.2) (Creatine kinase M chain) (Creatine phosphokinase M-type) (CPK-M) (M-CK)	0.047429	13.9702	-0.102327	0.919462	0.998783	-5.66609
P07356	Annexin A2 (Annexin II) (Annexin-2) (Calpactin I heavy chain) (Calpactin-1 heavy chain) (Chromobindin-8) (Lipocortin II) (Placental anticoagulant protein IV) (PAP-IV) (Protein I) (p36)	-0.36976	17.2748	0.665057	0.513206	0.998783	-5.46861
P07724	Albumin	0.226471	15.7077	-0.327693	0.747433	0.998783	-5.62068
P07743	BPI fold-containing family A member 2 (Parotid secretory protein) (PSP)	0.221086	15.7617	-0.429195	0.672125	0.998783	-5.5861
P07744	Keratin, type II cytoskeletal 4 (Cytokeratin-4) (CK-4) (Cytoskeletal 57 kDa keratin) (Keratin-4) (K4) (Type-II keratin Kb4)	0.21481	12.4954	-0.355746	0.725923	0.998783	-5.32736
P07758;Q00896	Alpha-1-antitrypsin 1-1 (AAT) (Alpha-1 protease inhibitor 1) (Alpha-1-antiproteinase) (Serine protease inhibitor 1-1) (Serine protease inhibitor A1a) (Serpin A1a)	0.82029	16.888	-1.6246	0.11907	0.998783	-4.52814
P07759;Q03734;Q91WP6		0.844931	17.3433	-1.50523	0.147064	0.998783	-4.68098
P07901	Heat shock protein HSP 90-alpha (EC 3.6.4.10) (Heat shock 86 kDa) (HSP 86) (HSP86) (Tumor-specific transplantation 86 kDa antigen) (TSTA)	-0.261462	14.1281	0.581544	0.567025	0.998783	-5.51581
P07901;P11499		-0.242094	14.1522	0.524152	0.605627	0.998783	-5.54471
P08003	Protein disulfide-isomerase A4 (EC 5.3.4.1) (Endoplasmic reticulum resident protein 72) (ER protein 72) (ERp-72) (ERp72)	-0.214199	13.7324	0.463473	0.647763	0.998783	-5.57209
P08071	Lactotransferrin (Lactoferrin) (EC 3.4.21.-)	1.06395	12.6937	-1.6132	0.124966	0.998783	-4.37934
P08113	Endoplasmin (94 kDa glucose-regulated protein) (GRP-94) (Endoplasmic reticulum resident protein 99) (ERp99) (Heat shock protein 90 kDa beta member 1) (Polymorphic tumor rejection antigen 1) (Tumor rejection antigen gp96)	-0.200363	14.7877	0.420949	0.678042	0.998783	-5.58931
P08113;P11499		-0.504143	14.9302	0.986029	0.335274	0.998783	-5.23222
P08228	Superoxide dismutase [Cu-Zn] (EC 1.15.1.1)	0.0191265	19.4614	-0.0340706	0.973141	0.998783	-5.67039
P08249	Malate dehydrogenase, mitochondrial (EC 1.1.1.37)	-0.2007	15.6907	0.381259	0.706817	0.998783	-5.60392
P08553;P31001	Neurofilament medium polypeptide (NF-M) (160 kDa neurofilament protein) (Neurofilament 3) (Neurofilament triplet M protein)	0.0135275	13.7568	-0.0289588	0.977169	0.998783	-5.67054
P08730	Keratin, type I cytoskeletal 13 (47 kDa cytokeratin) (Cytokeratin-13) (CK-13) (Keratin-13) (K13)	0.153084	13.4954	-0.311361	0.758577	0.998783	-5.62618
P08730;P19001		0.633252	14.7651	-1.04716	0.310366	0.998783	-5.17512
P08730;P19001;Q61414;Q61781;Q6IFX2;Q9D312;Q9QWL7;Q9Z2K1		0.874463	14.0457	-1.85758	0.0772171	0.998783	-4.20535
P08752	Guanine nucleotide-binding protein G(i) subunit alpha-2 (Adenylate cyclase-inhibiting G alpha protein)	-0.257803	12.5007	0.459813	0.650832	0.998783	-5.39693
P08752;Q9DC51		-0.11937	14.05	0.259886	0.797467	0.998783	-5.63973
P08905;P17897	Lysozyme C-2 (EC 3.2.1.17) (1,4-beta-N-acetylmuramidase C) (Lysozyme C type M)	0.250459	17.0906	-0.379877	0.708791	0.998783	-5.6037
P09036	Serine protease inhibitor Kazal-type 1 (P12) (Prostatic secretory glycoprotein) (Serine protease inhibitor Kazal-type 3)	0.414223	12.1157	-0.481886	0.636359	0.998783	-5.04742
P09055	Integrin beta-1 (Fibronectin receptor subunit beta) (VLA-4 subunit beta) (CD antigen CD29)	0.0210605	14.2682	-0.0472058	0.962792	0.998783	-5.6699
P09103	Protein disulfide-isomerase (PDI) (EC 5.3.4.1) (Cellular thyroid hormone-binding protein) (Endoplasmic reticulum resident protein 59) (ER protein 59) (ERp59) (Prolyl 4-hydroxylase subunit beta) (p55)	-0.321271	15.8116	0.619876	0.541965	0.998783	-5.4949
P09411	Phosphoglycerate kinase 1 (EC 2.7.2.3)	0.377896	13.1131	-0.611495	0.549602	0.998783	-5.41891
P09470	Angiotensin-converting enzyme (ACE) (EC 3.4.15.1) (Dipeptidyl carboxypeptidase I) (Kininase II) (CD antigen CD143) [Cleaved into: Angiotensin-converting enzyme, soluble form]	0.848033	16.8706	-1.68564	0.106574	0.998783	-4.44659
P09528	Ferritin heavy chain (Ferritin H subunit) (EC 1.16.3.1) [Cleaved into: Ferritin heavy chain, N-terminally processed]	0.2966	16.6234	-0.506042	0.618065	0.998783	-5.55322
P09671	Superoxide dismutase [Mn], mitochondrial (EC 1.15.1.1)	0.3754	16.3845	-0.701278	0.49078	0.998783	-5.44626
P09803	Cadherin-1 (ARC-1) (Epithelial cadherin) (E-cadherin) (Uvomorulin) (CD antigen CD324) [Cleaved into: E-Cad/CTF1; E-Cad/CTF2; E-Cad/CTF3]	0.697152	18.2576	-1.2876	0.211807	0.998783	-4.93563
P0C0S6;Q3THW5	Histone H2A.Z (H2A/z)	1.0539	12.5464	-1.84214	0.081868	0.998783	-4.12255
P0DP26;P0DP27;P0DP28	Calmodulin-1	-0.724263	15.1389	1.40079	0.175788	0.998783	-4.8072
P10107	Annexin A1 (Annexin I) (Annexin-1) (Calpactin II) (Calpactin-2) (Chromobindin-9) (Lipocortin I) (Phospholipase A2 inhibitory protein) (p35) [Cleaved into: Annexin Ac2-26]	-0.476075	14.1384	0.933032	0.361396	0.998783	-5.27704
P10126	Elongation factor 1-alpha 1 (EF-1-alpha-1) (Elongation factor Tu) (EF-Tu) (Eukaryotic elongation factor 1 A-1) (eEF1A-1)	-0.0404495	16.8964	0.0758005	0.940291	0.998783	-5.66827
P10518	Delta-aminolevulinic acid dehydratase (ALADH) (EC 4.2.1.24) (Porphobilinogen synthase)	0.05092	12.3511	-0.108072	0.915064	0.998783	-5.54088
P10605	Cathepsin B (EC 3.4.22.1) (Cathepsin B1) [Cleaved into: Cathepsin B light chain; Cathepsin B heavy chain]	0.0387607	15.809	-0.0733525	0.942215	0.998783	-5.66844
P10630;P60843		-0.108093	13.9448	0.243505	0.809962	0.998783	-5.64354
P10639	Thioredoxin (Trx) (ATL-derived factor) (ADF)	0.238556	15.6066	-0.478288	0.637356	0.998783	-5.56571
P10649	Glutathione S-transferase Mu 1 (EC 2.5.1.18) (GST 1-1) (GST class-mu 1) (Glutathione S-transferase GT8.7) (pmGT10)	-0.0596445	13.4875	0.121981	0.904067	0.998783	-5.66405
P10649;P15626		0.819014	10.3386	-1.14855	0.266525	0.998783	-4.74882
P10649;P15626;P19639		-0.173566	13.7805	0.2685	0.791345	0.998783	-5.34933
P10649;P15626;P48774		-0.207563	15.1362	0.421995	0.67729	0.998783	-5.58891
P10852	4F2 cell-surface antigen heavy chain (4F2hc) (Solute carrier family 3 member 2) (CD antigen CD98)	-0.27224	12.0303	0.317985	0.754575	0.998783	-5.0924
P10853;P10854;Q64475;Q64478;Q64524;Q64525;Q6ZWY9;Q8CGP1;Q8CGP2		1.3192	10.8052	-2.06951	0.0602653	0.998783	-3.91355
P10853;P10854;Q64475;Q64478;Q64525;Q6ZWY9;Q8CGP1;Q8CGP2		0.590783	15.8281	-1.13664	0.268411	0.998783	-5.09266
P10922	Histone H1.0 (Histone H1') (Histone H1(0)) (MyD196) [Cleaved into: Histone H1.0, N-terminally processed]	0.295597	12.7884	-0.377384	0.710522	0.998783	-5.17294
P11031	Activated RNA polymerase II transcriptional coactivator p15 (Positive cofactor 4) (PC4) (SUB1 homolog) (Single-stranded DNA-binding protein p9) (p14)	0.715023	14.0105	-1.51657	0.14419	0.998783	-4.66685
P11032	Granzyme A (EC 3.4.21.78) (Autocrine thymic lymphoma granzyme-like serine protease) (CTLA-3) (Fragmentin-1) (T cell-specific serine protease 1) (TSP-1)	-1.41471	12.5506	1.80802	0.0872182	0.998783	-4.11667
P11087	Collagen alpha-1(I) chain (Alpha-1 type I collagen)	0.372293	13.0882	-0.388876	0.702452	0.998783	-5.0739
P11088	Filaggrin	1.73783	11.4358	-2.0858	0.0532263	0.998783	-3.84323
P11247	Myeloperoxidase (MPO) (EC 1.11.2.2) [Cleaved into: Myeloperoxidase light chain; Myeloperoxidase heavy chain]	-0.444014	11.0673	0.539389	0.596984	0.998783	-5.02743
P11276	Fibronectin (FN) [Cleaved into: Anastellin]	0.00405714	12.2189	-0.00874852	0.993106	0.998783	-5.59143
P11352	Glutathione peroxidase 1 (GPx-1) (GSHPx-1) (EC 1.11.1.9) (Cellular glutathione peroxidase) (Selenium-dependent glutathione peroxidase 1)	0.630561	13.2204	-1.41234	0.172405	0.998783	-4.79359
P11438	Lysosome-associated membrane glycoprotein 1 (LAMP-1) (Lysosome-associated membrane protein 1) (120 kDa lysosomal membrane glycoprotein) (CD107 antigen-like family member A) (LGP-120) (Lysosomal membrane glycoprotein A) (LGP-A) (P2B) (CD antigen CD107a)	0.0125345	15.6147	-0.0252504	0.980092	0.998783	-5.67064
P11499	Heat shock protein HSP 90-beta (Heat shock 84 kDa) (HSP 84) (HSP84) (Tumor-specific transplantation 84 kDa antigen) (TSTA)	-0.415111	14.4796	0.909546	0.373318	0.998783	-5.29625
P11588;P11589	Major urinary protein 1 (MUP 1)	-1.4791	16.8687	1.73412	0.105673	0.998783	-4.30342
P11590	Major urinary protein 4 (MUP 4)	-1.06707	14.3297	2.22798	0.0368712	0.998783	-3.63434
P11679	Keratin, type II cytoskeletal 8 (Cytokeratin endo A) (Cytokeratin-8) (CK-8) (Keratin-8) (K8) (Type-II keratin Kb8)	0.256236	15.3537	-0.360213	0.723921	0.998783	-5.60992
P11679;P50446;Q3UV17;Q99M73;Q9Z331		0.65571	15.5977	-1.31359	0.203065	0.998783	-4.90693
P11679;Q6IFZ6;Q8VED5;Q922U2		0.344809	13.8158	-0.636816	0.531419	0.998783	-5.40663
P11679;Q922U2		0.08671	15.9279	-0.111715	0.912652	0.998783	-5.54042
P11835	Integrin beta-2 (Cell surface adhesion glycoproteins LFA-1/CR3/p150,95 subunit beta) (Complement receptor C3 subunit beta) (CD antigen CD18)	0.0630148	10.955	-0.12267	0.903717	0.998783	-5.4309
P11983	T-complex protein 1 subunit alpha (TCP-1-alpha) (CCT-alpha) (Tailless complex polypeptide 1A) (TCP-1-A) (Tailless complex polypeptide 1B) (TCP-1-B)	0.777902	11.4591	-1.09882	0.287046	0.998783	-4.78817
P12023	Amyloid-beta precursor protein (ABPP) (APP) (Alzheimer disease amyloid A4 protein homolog) (Alzheimer disease amyloid protein) (Amyloid precursor protein) (Amyloid-beta (A4) precursor protein) (Amyloid-beta A4 protein) (Amyloidogenic glycoprotein) (AG) [Cleaved into: N-APP; Soluble APP-alpha (S-APP-alpha); Soluble APP-beta (S-APP-beta); C99 (APP-C99) (Beta-secretase C-terminal fragment) (Beta-CTF…	0.498697	10.8431	-0.608454	0.551357	0.998783	-5.00059
P12246	Serum amyloid P-component (SAP)	0.653263	12.451	-1.48354	0.153417	0.998783	-4.6493
P12265	Beta-glucuronidase (EC 3.2.1.31)	0.357037	14.4541	-0.723568	0.477264	0.998783	-5.43195
P12382	ATP-dependent 6-phosphofructokinase, liver type (ATP-PFK) (PFK-L) (EC 2.7.1.11) (6-phosphofructokinase type B) (Phosphofructo-1-kinase isozyme B) (PFK-B) (Phosphohexokinase)	0.168156	11.9822	-0.230125	0.820719	0.998783	-5.20665
P12382;Q9WUA3		0.111764	10.9175	-0.214445	0.832593	0.998783	-5.42139
P12787	Cytochrome c oxidase subunit 5A, mitochondrial (Cytochrome c oxidase polypeptide Va)	-0.811758	14.2625	1.77567	0.0901899	0.998783	-4.32234
P12815	Programmed cell death protein 6 (ALG-257) (Apoptosis-linked gene 2 protein) (ALG-2) (PMP41)	0.555867	11.9529	-1.26894	0.218936	0.998783	-4.89052
P12970	60S ribosomal protein L7a (Surfeit locus protein 3)	-0.0996075	13.1281	0.233229	0.817827	0.998783	-5.6458
P13020	Gelsolin (Actin-depolymerizing factor) (ADF) (Brevin)	0.396045	13.5318	-0.621663	0.5419	0.998783	-5.27688
P13542	Myosin-8 (Myosin heavy chain 8) (Myosin heavy chain, skeletal muscle, perinatal) (MyHC-perinatal)	-0.0207242	15.2791	0.0426686	0.966366	0.998783	-5.67009
P13634	Carbonic anhydrase 1 (EC 4.2.1.1) (Carbonate dehydratase I) (Carbonic anhydrase I) (CA-I)	-0.435456	18.2238	0.478182	0.641557	0.998783	-5.56225
P14069	Protein S100-A6 (5B10) (Calcyclin) (Prolactin receptor-associated protein) (S100 calcium-binding protein A6)	-0.731505	17.7452	1.40423	0.174777	0.998783	-4.80316
P14094	Sodium/potassium-transporting ATPase subunit beta-1 (Sodium/potassium-dependent ATPase subunit beta-1)	-0.519822	18.0019	0.936307	0.359691	0.998783	-5.27438
P14115	60S ribosomal protein L27a (L29)	-0.0412057	12.6044	0.0866378	0.931775	0.998783	-5.66746
P14131	40S ribosomal protein S16	-0.627248	14.1831	1.4313	0.166965	0.998783	-4.77107
P14148	60S ribosomal protein L7	-0.163419	13.3375	0.370815	0.714466	0.998783	-5.60753
P14152	Malate dehydrogenase, cytoplasmic (EC 1.1.1.37) (Aromatic alpha-keto acid reductase) (KAR) (EC 1.1.1.96) (Cytosolic malate dehydrogenase)	-0.207626	16.1621	0.350873	0.729157	0.998783	-5.61414
P14206	40S ribosomal protein SA (37 kDa laminin receptor precursor) (37LRP) (37 kDa oncofetal antigen) (37/67 kDa laminin receptor) (LRP/LR) (67 kDa laminin receptor) (67LR) (Laminin receptor 1) (LamR) (Laminin-binding protein precursor p40) (LBP/p40) (OFA/iLRP)	0.359913	12.0233	-0.621863	0.541772	0.998783	-5.27678
P14432	H-2 class I histocompatibility antigen, TLA(B) alpha chain (MHC thymus leukemia antigen)	-0.40444	11.4456	0.718003	0.481903	0.998783	-5.21898
P14824	Annexin A6 (67 kDa calelectrin) (Annexin VI) (Annexin-6) (Calphobindin-II) (CPB-II) (Chromobindin-20) (Lipocortin VI) (Protein III) (p68) (p70)	-0.0971007	12.9074	0.22868	0.821316	0.998783	-5.64677
P14824;P97429		0.08964	14.2163	-0.191501	0.849961	0.998783	-5.65398
P14847	C-reactive protein	0.147251	12.5886	-0.323523	0.749636	0.998783	-5.54392
P14869	60S acidic ribosomal protein P0 (60S ribosomal protein L10E)	0.0667437	12.1529	-0.135404	0.893707	0.998783	-5.5379
P15261	Interferon gamma receptor 1 (IFN-gamma receptor 1) (IFN-gamma-R1) (Interferon gamma receptor alpha-chain) (IFN-gamma-R-alpha) (CD antigen CD119)	-0.999352	11.4541	1.19857	0.248003	0.998783	-4.6565
P15532;Q01768	Nucleoside diphosphate kinase A (NDK A) (NDP kinase A) (EC 2.7.4.6) (Metastasis inhibition factor NM23) (NDPK-A) (Tumor metastatic process-associated protein) (nm23-M1)	0.0839478	14.6233	-0.173562	0.863861	0.998783	-5.657
P15626	Glutathione S-transferase Mu 2 (EC 2.5.1.18) (GST 5-5) (GST class-mu 2) (Glutathione S-transferase pmGT2)	-0.0737323	11.7308	0.137096	0.892466	0.998783	-5.43307
P15864;P43274;P43275;P43277		0.954143	12.3681	-1.27707	0.218613	0.998783	-4.64311
P15864;P43274;P43277		0.181746	13.5622	-0.220521	0.828683	0.998783	-5.35927
P15864;P43277		0.276707	12.7113	-0.648104	0.523897	0.998783	-5.47868
P15945;P15947	Kallikrein 1-related peptidase b5 (EC 3.4.21.35) (Glandular kallikrein K5) (mGK-5) (Tissue kallikrein-5)	0.111302	16.6124	-0.181626	0.857735	0.998783	-5.65563
P15947	Kallikrein-1 (EC 3.4.21.35) (Glandular kallikrein K1) (KAL-B) (Renal kallikrein) (Tissue kallikrein-6) (mGK-6)	-0.15627	21.2558	0.24542	0.808499	0.998783	-5.6431
P16110	Galectin-3 (Gal-3) (35 kDa lectin) (Carbohydrate-binding protein 35) (CBP 35) (Galactose-specific lectin 3) (IgE-binding protein) (L-34 galactoside-binding lectin) (Laminin-binding protein) (Lectin L-29) (Mac-2 antigen)	-0.474937	12.3716	0.93864	0.359614	0.998783	-5.16188
P16332	Methylmalonyl-CoA mutase, mitochondrial (MCM) (EC 5.4.99.2) (Methylmalonyl-CoA isomerase)	-0.550728	11.8482	0.912618	0.374106	0.998783	-5.04037
P16406	Glutamyl aminopeptidase (EAP) (EC 3.4.11.7) (Aminopeptidase A) (AP-A) (BP-1/6C3 antigen) (CD antigen CD249)	0.610422	18.6341	-1.16737	0.256063	0.998783	-5.06206
P16546	Spectrin alpha chain, non-erythrocytic 1 (Alpha-II spectrin) (Fodrin alpha chain)	-0.366017	14.7839	0.805363	0.429578	0.998783	-5.37582
P16627	Heat shock 70 kDa protein 1-like (Heat shock 70 kDa protein 1L) (Heat shock 70 kDa-like protein 1) (Spermatid-specific heat shock protein 70)	-0.319104	13.9536	0.688911	0.498373	0.998783	-5.45402
P16627;P20029;P63017		-0.0616797	15.9173	0.124431	0.90215	0.998783	-5.66377
P16627;P63017		0.166494	16.4611	-0.253722	0.802417	0.998783	-5.51681
P16675	Lysosomal protective protein (EC 3.4.16.5) (Carboxypeptidase C) (Carboxypeptidase L) (Cathepsin A) (Protective protein cathepsin A) (PPCA) (Protective protein for beta-galactosidase) [Cleaved into: Lysosomal protective protein 32 kDa chain; Lysosomal protective protein 20 kDa chain]	-0.281812	12.2554	0.515837	0.6122	0.998783	-5.32761
P16858	Glyceraldehyde-3-phosphate dehydrogenase (GAPDH) (EC 1.2.1.12) (Peptidyl-cysteine S-nitrosylase GAPDH) (EC 2.6.99.-)	0.569523	16.6736	-0.998825	0.329179	0.998783	-5.22105
P16858;Q64467		0.646972	13.2706	-1.28293	0.213408	0.998783	-4.94074
P17047	Lysosome-associated membrane glycoprotein 2 (LAMP-2) (Lysosome-associated membrane protein 2) (CD107 antigen-like family member B) (Lysosomal membrane glycoprotein type B) (LGP-B) (CD antigen CD107b)	0.0477088	15.1315	-0.104424	0.917817	0.998783	-5.66589
P17182	Alpha-enolase (EC 4.2.1.11) (2-phospho-D-glycerate hydro-lyase) (Enolase 1) (Non-neural enolase) (NNE)	-0.638376	15.3528	1.2401	0.228531	0.998783	-4.98684
P17182;P17183		-0.478067	14.364	0.954515	0.350614	0.998783	-5.25917
P17183;P21550		-0.179059	12.02	0.407448	0.687978	0.998783	-5.51903
P17427	AP-2 complex subunit alpha-2 (100 kDa coated vesicle protein C) (Adaptor protein complex AP-2 subunit alpha-2) (Adaptor-related protein complex 2 subunit alpha-2) (Alpha-adaptin C) (Alpha2-adaptin) (Clathrin assembly protein complex 2 alpha-C large chain) (Plasma membrane adaptor HA2/AP2 adaptin alpha C subunit)	-0.147332	12.1627	0.248808	0.806467	0.998783	-5.35349
P17439	Lysosomal acid glucosylceramidase (Lysosomal acid GCase) (EC 3.2.1.45) (Acid beta-glucosidase) (Beta-glucocerebrosidase) (Cholesterol glucosyltransferase) (SGTase) (EC 2.4.1.-) (Cholesteryl-beta-glucosidase) (EC 3.2.1.-) (D-glucosyl-N-acylsphingosine glucohydrolase) (Lysosomal cholesterol glycosyltransferase) (Lysosomal galactosylceramidase) (EC 3.2.1.46) (Lysosomal glycosylceramidase)	-0.253987	12.7586	0.551493	0.58708	0.998783	-5.53131
P17533	Alpha-defensin 29 (Alpha-defensin-related sequence 1) (CRS1C) (Cryptdin-related protein 1C) (Defensin-related cryptdin-related sequence 1)	0.53868	12.1226	-0.747007	0.470481	0.998783	-5.40955
P17563	Methanethiol oxidase (MTO) (EC 1.8.3.4) (56 kDa selenium-binding protein) (SBP56) (SP56) (Selenium-binding protein 1)	-0.367764	19.4196	0.653848	0.520261	0.998783	-5.4753
P17665	Cytochrome c oxidase subunit 7C, mitochondrial (Cytochrome c oxidase polypeptide VIIc)	-1.03902	13.3692	1.57108	0.132554	0.998783	-4.42516
P17710	Hexokinase-1 (EC 2.7.1.1) (Hexokinase type I) (HK I) (Hexokinase, tumor isozyme)	-0.586243	14.0742	0.966485	0.346515	0.998783	-5.05095
P17742	Peptidyl-prolyl cis-trans isomerase A (PPIase A) (EC 5.2.1.8) (Cyclophilin A) (Cyclosporin A-binding protein) (Rotamase A) (SP18) [Cleaved into: Peptidyl-prolyl cis-trans isomerase A, N-terminally processed]	0.117556	14.61	-0.241581	0.811434	0.998783	-5.64397
P17751	Triosephosphate isomerase (TIM) (EC 5.3.1.1) (Methylglyoxal synthase) (EC 4.2.3.3) (Triose-phosphate isomerase)	0.207242	14.1759	-0.390407	0.700525	0.998783	-5.6004
P17892	Pancreatic lipase-related protein 2 (PL-RP2) (Cytotoxic T lymphocyte lipase) (Galactolipase) (EC 3.1.1.26) (Triacylglycerol lipase) (EC 3.1.1.3)	0.187883	18.4786	-0.350482	0.729446	0.998783	-5.61427
P17897	Lysozyme C-1 (EC 3.2.1.17) (1,4-beta-N-acetylmuramidase C) (Lysozyme C type P)	0.0990377	17.2877	-0.160746	0.873949	0.998783	-5.65894
P18242	Cathepsin D (EC 3.4.23.5)	-0.381586	13.887	0.802284	0.431318	0.998783	-5.37803
P18525	Ig heavy chain V region 5-84	1.50771	15.6411	-2.15266	0.0477471	0.998783	-3.76632
P18531	Ig heavy chain V region 3-6 (Ig heavy chain V region M315)	2.21009	14.8171	-1.87676	0.102638	0.998783	-4.26805
P18572	Basigin (Basic immunoglobulin superfamily) (HT7 antigen) (Membrane glycoprotein gp42) (CD antigen CD147)	-0.629691	16.2819	1.13288	0.269954	0.998783	-5.09636
P18760	Cofilin-1 (Cofilin, non-muscle isoform)	1.13156	13.1488	-1.70146	0.106931	0.998783	-4.27758
P18760;P45591		0.19716	13.7999	-0.422435	0.676974	0.998783	-5.58874
P18761	Carbonic anhydrase 6 (EC 4.2.1.1) (Carbonate dehydratase VI) (Carbonic anhydrase VI) (CA-VI) (Salivary carbonic anhydrase) (Secreted carbonic anhydrase)	-0.384983	19.5379	0.643109	0.52707	0.998783	-5.4816
P19001	Keratin, type I cytoskeletal 19 (Cytokeratin-19) (CK-19) (Keratin-19) (K19)	1.05619	16.535	-1.40005	0.182045	0.998783	-4.74789
P19001;Q61414;Q61781;Q6IFX2;Q9QWL7		0.338002	16.3427	-0.648364	0.523732	0.998783	-5.47853
P19096	Fatty acid synthase (EC 2.3.1.85) (Type I Fatty Acid Synthase) [Includes: [Acyl-carrier-protein] S-acetyltransferase (EC 2.3.1.38); [Acyl-carrier-protein] S-malonyltransferase (EC 2.3.1.39); 3-oxoacyl-[acyl-carrier-protein] synthase (EC 2.3.1.41); 3-oxoacyl-[acyl-carrier-protein] reductase (EC 1.1.1.100); 3-hydroxyacyl-[acyl-carrier-protein] dehydratase (EC 4.2.1.59); Enoyl-[acyl-carrier-protein]…	0.179271	12.438	-0.322366	0.750862	0.998783	-5.39658
P19157	Glutathione S-transferase P 1 (Gst P1) (EC 2.5.1.18) (GST YF-YF) (GST class-pi) (GST-piB) (Preadipocyte growth factor)	-0.481672	12.6797	0.76861	0.454558	0.998783	-5.39798
P19253	60S ribosomal protein L13a (Transplantation antigen P198) (Tum-P198 antigen)	0.100464	12.8791	-0.19098	0.850454	0.998783	-5.57494
P19467	Mucin-13 (MUC-13) (Cell surface antigen 114/A10) (Lymphocyte antigen 64)	0.723681	16.8122	-0.940016	0.362726	0.998783	-5.26711
P19536	Cytochrome c oxidase subunit 5B, mitochondrial (Cytochrome c oxidase polypeptide Vb)	-0.300879	13.4911	0.483828	0.635169	0.998783	-5.48169
P19639	Glutathione S-transferase Mu 3 (EC 2.5.1.18) (GST class-mu 3) (Glutathione S-transferase GT9.3)	0.213343	12.172	-0.366329	0.718359	0.998783	-5.38365
P19783	Cytochrome c oxidase subunit 4 isoform 1, mitochondrial (Cytochrome c oxidase polypeptide IV) (Cytochrome c oxidase subunit IV isoform 1) (COX IV-1)	-0.726281	16.8304	1.29885	0.20799	0.998783	-4.92327
P20029	Endoplasmic reticulum chaperone BiP (EC 3.6.4.10) (78 kDa glucose-regulated protein) (GRP-78) (Binding-immunoglobulin protein) (BiP) (Heat shock protein 70 family protein 5) (HSP70 family protein 5) (Heat shock protein family A member 5) (Immunoglobulin heavy chain-binding protein)	-0.634678	15.7807	1.21206	0.238864	0.998783	-5.01629
P20060	Beta-hexosaminidase subunit beta (EC 3.2.1.52) (Beta-N-acetylhexosaminidase subunit beta) (Hexosaminidase subunit B) (N-acetyl-beta-glucosaminidase subunit beta)	0.288722	13.6327	-0.63691	0.531022	0.998783	-5.4852
P20108	Thioredoxin-dependent peroxide reductase, mitochondrial (EC 1.11.1.24) (Antioxidant protein 1) (AOP-1) (PRX III) (Perioredoxin-3) (Protein MER5) (Thioredoxin-dependent peroxiredoxin 3)	-0.351096	12.9881	0.688243	0.499153	0.998783	-5.37652
P20444	Protein kinase C alpha type (PKC-A) (PKC-alpha) (EC 2.7.11.13)	0.40252	14.4626	-0.907917	0.374159	0.998783	-5.29757
P21107;P58771		0.797873	12.1108	-1.09475	0.288778	0.998783	-4.79128
P21278	Guanine nucleotide-binding protein subunit alpha-11 (G alpha-11) (G-protein subunit alpha-11)	0.040644	13.2808	-0.0585591	0.954177	0.998783	-5.6693
P21278;P21279		0.0808548	11.4305	-0.114959	0.909814	0.998783	-5.23272
P21278;P21279;P30677		0.156362	13.9533	-0.307881	0.761187	0.998783	-5.62718
P21279	Guanine nucleotide-binding protein G(q) subunit alpha (Guanine nucleotide-binding protein alpha-q)	0.0837341	11.3093	-0.14218	0.888597	0.998783	-5.3709
P21440;P21447		-0.203853	15.4657	0.382225	0.706111	0.998783	-5.60358
P21440;P21447;Q9QY30		-0.0259	13.3857	0.0267676	0.978973	0.998783	-5.12717
P21447	ATP-dependent translocase ABCB1 (ATP-binding cassette sub-family B member 1A) (MDR1A) (Multidrug resistance protein 1A) (EC 7.6.2.2) (Multidrug resistance protein 3) (P-glycoprotein 3) (Phospholipid transporter ABCB1) (EC 7.6.2.1)	0.002085	16.0844	-0.00363977	0.99713	0.998783	-5.67093
P21460	Cystatin-C (Cystatin-3)	0.125175	12.6549	-0.186942	0.854124	0.998783	-5.36466
P21550	Beta-enolase (EC 4.2.1.11) (2-phospho-D-glycerate hydro-lyase) (Enolase 3) (Muscle-specific enolase) (MSE) (Skeletal muscle enolase)	0.107136	13.6382	-0.233719	0.817452	0.998783	-5.64569
P21956	Lactadherin (MFGM) (Milk fat globule-EGF factor 8) (MFG-E8) (SED1) (Sperm surface protein SP47) (MP47)	-0.338531	11.9816	0.595117	0.559119	0.998783	-5.28467
P22599	Alpha-1-antitrypsin 1-2 (AAT) (Alpha-1 protease inhibitor 2) (Alpha-1-antiproteinase) (Serine protease inhibitor 1-2) (Serine protease inhibitor A1b) (Serpin A1b)	0.390668	16.8915	-0.775314	0.446743	0.998783	-5.39709
P22599;Q00897		0.221151	18.1966	-0.402174	0.691595	0.998783	-5.5964
P22599;Q00897;Q00898		0.480882	19.7041	-0.880646	0.388414	0.998783	-5.31922
P22599;Q00898		0.368155	12.7412	-0.775598	0.446579	0.998783	-5.3969
P23492	Purine nucleoside phosphorylase (PNP) (EC 2.4.2.1) (Inosine phosphorylase) (Inosine-guanosine phosphorylase)	0.833308	12.5658	-1.49054	0.15327	0.998783	-4.5489
P23591	GDP-L-fucose synthase (EC 1.1.1.271) (GDP-4-keto-6-deoxy-D-mannose-3,5-epimerase-4-reductase) (Protein FX) (Red cell NADP(H)-binding protein) (Transplantation antigen P35B) (Tum-P35B antigen)	0.459599	10.9133	-0.834994	0.414587	0.998783	-5.14772
P23780	Beta-galactosidase (EC 3.2.1.23) (Acid beta-galactosidase) (Lactase)	-0.384192	14.1674	0.864781	0.396869	0.998783	-5.33154
P23953	Carboxylesterase 1C (EC 3.1.1.1) (Liver carboxylesterase N) (Lung surfactant convertase) (PES-N)	1.14287	11.8217	-1.995	0.0612926	0.998783	-3.92084
P23953;Q8VCC2;Q8VCT4		-0.175681	14.3238	0.278247	0.783988	0.998783	-5.45503
P24270	Catalase (EC 1.11.1.6)	-0.657013	12.4063	1.1397	0.26924	0.998783	-4.90467
P24369	Peptidyl-prolyl cis-trans isomerase B (PPIase B) (EC 5.2.1.8) (CYP-S1) (Cyclophilin B) (Rotamase B) (S-cyclophilin) (SCYLP)	-0.533131	15.4389	1.08857	0.288602	0.998783	-5.13911
P24527	Leukotriene A-4 hydrolase (LTA-4 hydrolase) (EC 3.3.2.6) (Leukotriene A(4) hydrolase) (Tripeptide aminopeptidase LTA4H) (EC 3.4.11.4)	0.196237	12.5723	-0.354425	0.727582	0.998783	-5.61226
P24549	Aldehyde dehydrogenase 1A1 (EC 1.2.1.19) (EC 1.2.1.28) (EC 1.2.1.3) (EC 1.2.1.36) (3-deoxyglucosone dehydrogenase) (ALDH-E1) (ALHDII) (Aldehyde dehydrogenase family 1 member A1) (Aldehyde dehydrogenase, cytosolic) (Retinal dehydrogenase 1) (RALDH 1) (RalDH1)	-0.257484	13.2956	0.336426	0.74266	0.998783	-5.61683
P24668	Cation-dependent mannose-6-phosphate receptor (CD Man-6-P receptor) (CD-MPR) (46 kDa mannose 6-phosphate receptor) (MPR 46)	-0.313529	13.0547	0.723633	0.477225	0.998783	-5.43191
P24822	Intestinal-type alkaline phosphatase (IAP) (Intestinal alkaline phosphatase) (EC 3.1.3.1) (Alkaline phosphatase 3)	0.139405	21.2108	-0.230254	0.820109	0.998783	-5.64643
P24822;P24823		0.514291	17.5195	-0.964357	0.345772	0.998783	-5.25084
P24823	Alkaline phosphatase, germ cell type (EC 3.1.3.1) (Alkaline phosphatase 5) (Alkaline phosphatase, placental-like) (Embryonic alkaline phosphatase) (EAP) (Embryonic-type alkaline phosphatase)	0.827496	12.4772	-1.78446	0.0894266	0.998783	-4.26521
P25444	40S ribosomal protein S2 (40S ribosomal protein S4) (Protein LLRep3)	0.223968	13.1371	-0.395207	0.697651	0.998783	-5.5982
P26040	Ezrin (Cytovillin) (Villin-2) (p81)	0.0965923	15.6809	-0.178879	0.859736	0.998783	-5.65614
P26040;P26041;P26043		0.250791	14.2345	-0.445957	0.661305	0.998783	-5.57845
P26040;P26043		0.145498	12.9845	-0.190846	0.851684	0.998783	-5.47262
P26043	Radixin (ESP10)	-0.316945	13.5418	0.609509	0.548839	0.998783	-5.50054
P26150	3 beta-hydroxysteroid dehydrogenase/Delta 5-->4-isomerase type 3 (3 beta-hydroxysteroid dehydrogenase/Delta 5-->4-isomerase type III) (3-beta-HSD III) [Includes: 3-beta-hydroxy-Delta(5)-steroid dehydrogenase (EC 1.1.1.145) (3-beta-hydroxy-5-ene steroid dehydrogenase) (Progesterone reductase); Steroid Delta-isomerase (EC 5.3.3.1) (Delta-5-3-ketosteroid isomerase)]	0.813797	10.6091	-0.995378	0.334247	0.998783	-4.79732
P26231	Catenin alpha-1 (102 kDa cadherin-associated protein) (Alpha E-catenin) (CAP102)	-0.231268	14.0096	0.52124	0.607618	0.998783	-5.5461
P26231;Q61301		0.23813	12.5084	-0.416146	0.681934	0.998783	-5.42055
P26443	Glutamate dehydrogenase 1, mitochondrial (GDH 1) (EC 1.4.1.3)	-0.242629	13.6702	0.404284	0.690732	0.998783	-5.37118
P26638	Serine--tRNA ligase, cytoplasmic (EC 6.1.1.11) (Seryl-tRNA synthetase) (SerRS) (Seryl-tRNA(Ser/Sec) synthetase)	-0.257738	10.0816	0.624436	0.539353	0.998783	-5.41354
P27005	Protein S100-A8 (Calgranulin-A) (Chemotactic cytokine CP-10) (Leukocyte L1 complex light chain) (Migration inhibitory factor-related protein 8) (MRP-8) (p8) (Pro-inflammatory S100 cytokine) (S100 calcium-binding protein A8)	-119.099	9.19253	0.645455	0.527706	0.998783	-4.59513
P27046	Alpha-mannosidase 2 (EC 3.2.1.114) (Golgi alpha-mannosidase II) (AMan II) (Man II) (Mannosidase alpha class 2A member 1) (Mannosyl-oligosaccharide 1,3-1,6-alpha-mannosidase)	0.35406	12.0505	-0.712383	0.484824	0.998783	-5.32236
P27601	Guanine nucleotide-binding protein subunit alpha-13 (G alpha-13) (G-protein subunit alpha-13)	0.275564	12.5332	-0.306999	0.762771	0.998783	-5.09616
P27659	60S ribosomal protein L3 (J1 protein)	-0.0639724	11.776	0.12644	0.90073	0.998783	-5.58092
P27773	Protein disulfide-isomerase A3 (EC 5.3.4.1) (58 kDa glucose-regulated protein) (58 kDa microsomal protein) (p58) (Disulfide isomerase ER-60) (Endoplasmic reticulum resident protein 57) (ER protein 57) (ERp57) (Endoplasmic reticulum resident protein 60) (ER protein 60) (ERp60)	-0.454902	15.2717	0.739363	0.469927	0.998783	-5.41953
P27784	C-C motif chemokine 6 (Protein C10) (Small-inducible cytokine A6) [Cleaved into: CCL6(22-95); CCL6(23-95)]	0.242864	11.4536	-0.333739	0.745216	0.998783	-5.33134
P28076	Proteasome subunit beta type-9 (EC 3.4.25.1) (LMP-2d) (Low molecular mass protein 2) (Macropain chain 7) (Multicatalytic endopeptidase complex chain 7) (Proteasome chain 7) (Proteasome subunit beta-1i) (Really interesting new gene 12 protein)	0.543947	13.634	-1.0694	0.297543	0.998783	-5.09131
P28271	Cytoplasmic aconitate hydratase (Aconitase) (EC 4.2.1.3) (Citrate hydro-lyase) (Iron regulatory protein 1) (IRP1) (Iron-responsive element-binding protein 1) (IRE-BP 1)	-0.539568	13.2069	0.985727	0.336568	0.998783	-5.12347
P28310;P50706;P50707;P50708;P50711;P50713;Q64016	Alpha-defensin 3 (Defensin-related cryptdin-3)	0.449731	20.6961	-0.807355	0.428455	0.998783	-5.37438
P28474	Alcohol dehydrogenase class-3 (EC 1.1.1.1) (Alcohol dehydrogenase 2) (Alcohol dehydrogenase 5) (Alcohol dehydrogenase B2) (ADH-B2) (Alcohol dehydrogenase class-III) (Glutathione-dependent formaldehyde dehydrogenase) (FALDH) (FDH) (GSH-FDH) (EC 1.1.1.-) (S-(hydroxymethyl)glutathione dehydrogenase) (EC 1.1.1.284)	-0.0970505	14.8056	0.20653	0.838354	0.998783	-5.65121
P28660	Nck-associated protein 1 (NAP 1) (Brain protein H19) (MH19) (Membrane-associated protein HEM-2) (p125Nap1)	-0.259038	10.4894	0.452815	0.656363	0.998783	-5.29408
P28665	Murinoglobulin-1 (MuG1)	0.404108	13.1779	-0.836741	0.4121	0.998783	-5.3528
P28825	Meprin A subunit alpha (EC 3.4.24.18) (Endopeptidase-2) (MEP-1)	0.0705397	17.9778	-0.138784	0.890935	0.998783	-5.66202
P28843	Dipeptidyl peptidase 4 (EC 3.4.14.5) (Dipeptidyl peptidase IV) (DPP IV) (T-cell activation antigen CD26) (Thymocyte-activating molecule) (THAM) (CD antigen CD26) [Cleaved into: Dipeptidyl peptidase 4 membrane form (Dipeptidyl peptidase IV membrane form); Dipeptidyl peptidase 4 soluble form (Dipeptidyl peptidase IV soluble form)]	0.0253773	19.0331	-0.0472206	0.962781	0.998783	-5.6699
P28867	Protein kinase C delta type (EC 2.7.11.13) (Tyrosine-protein kinase PRKCD) (EC 2.7.10.2) (nPKC-delta) [Cleaved into: Protein kinase C delta type regulatory subunit; Protein kinase C delta type catalytic subunit (Sphingosine-dependent protein kinase-1) (SDK1)]	-0.546864	12.2875	0.709696	0.486918	0.998783	-5.01882
P29391	Ferritin light chain 1 (Ferritin L subunit 1)	0.31282	16.4566	-0.526128	0.604277	0.998783	-5.54376
P29416	Beta-hexosaminidase subunit alpha (EC 3.2.1.52) (Beta-N-acetylhexosaminidase subunit alpha) (Hexosaminidase subunit A) (N-acetyl-beta-glucosaminidase subunit alpha)	0.0716968	13.9937	-0.16376	0.871476	0.998783	-5.65853
P29452	Caspase-1 (CASP-1) (EC 3.4.22.36) (Interleukin-1 beta convertase) (IL-1BC) (Interleukin-1 beta-converting enzyme) (ICE) (IL-1 beta-converting enzyme) (p45) [Cleaved into: Caspase-1 subunit p20; Caspase-1 subunit p10]	0.26178	11.4394	-0.47812	0.638278	0.998783	-5.34382
P29699	Alpha-2-HS-glycoprotein (Countertrypin) (Fetuin-A)	-0.10412	13.6001	0.171228	0.865941	0.998783	-5.42419
P29758	Ornithine aminotransferase, mitochondrial (EC 2.6.1.13) (Ornithine--oxo-acid aminotransferase)	-0.459274	15.0162	1.03165	0.313899	0.998783	-5.19181
P30275	Creatine kinase U-type, mitochondrial (EC 2.7.3.2) (Acidic-type mitochondrial creatine kinase) (Mia-CK) (Ubiquitous mitochondrial creatine kinase) (U-MtCK)	-0.0968843	17.3525	0.178149	0.860302	0.998783	-5.65626
P30416	Peptidyl-prolyl cis-trans isomerase FKBP4 (PPIase FKBP4) (EC 5.2.1.8) (52 kDa FK506-binding protein) (52 kDa FKBP) (FKBP-52) (59 kDa immunophilin) (p59) (FK506-binding protein 4) (FKBP-4) (FKBP59) (HSP-binding immunophilin) (HBI) (Immunophilin FKBP52) (Rotamase) [Cleaved into: Peptidyl-prolyl cis-trans isomerase FKBP4, N-terminally processed]	-0.462389	12.6452	0.506957	0.619043	0.998783	-5.03897
P30681;P63158		-0.463535	13.7829	0.76681	0.453062	0.998783	-5.18894
P30999	Catenin delta-1 (Cadherin-associated Src substrate) (CAS) (p120 catenin) (p120(ctn)) (p120(cas))	-0.188024	12.41	0.30675	0.76273	0.998783	-5.34008
P31428	Dipeptidase 1 (DPEP-1) (EC 3.4.13.19) (Beta-lactamase) (EC 3.5.2.6) (Membrane-bound dipeptidase 1) (MBD-1) (Microsomal dipeptidase) (Renal dipeptidase)	0.343461	18.8369	-0.622283	0.540412	0.998783	-5.49354
P31725	Protein S100-A9 (Calgranulin-B) (Leukocyte L1 complex heavy chain) (Migration inhibitory factor-related protein 14) (MRP-14) (p14) (S100 calcium-binding protein A9)	-0.330672	13.2307	0.627051	0.537763	0.998783	-5.49045
P31809	Carcinoembryonic antigen-related cell adhesion molecule 1 (Biliary glycoprotein 1) (BGP-1) (Biliary glycoprotein D) (MHVR1) (Murine hepatitis virus receptor) (MHV-R) (CD antigen CD66a)	0.257983	18.5517	-0.453216	0.655012	0.998783	-5.57639
P32261	Antithrombin-III (ATIII) (Serpin C1)	0.419507	14.4729	-0.904628	0.37586	0.998783	-5.30021
P32883;Q61411	GTPase KRas (EC 3.6.5.2) (K-Ras 2) (Ki-Ras) (c-K-ras) (c-Ki-ras) [Cleaved into: GTPase KRas, N-terminally processed]	-63.5159	13.1226	0.294048	0.77247	0.998783	-4.59514
P35230	Regenerating islet-derived protein 3-beta (REG-3-beta) (Pancreatitis-associated protein 1) (Regenerating islet-derived protein III-beta) (Reg III-beta) [Cleaved into: Regenerating islet-derived protein 3-beta 16.5 kDa form; Regenerating islet-derived protein 3-beta 15 kDa form]	0.469497	18.176	-0.807521	0.428361	0.998783	-5.37426
P35276	Ras-related protein Rab-3D	0.627864	11.3294	-1.10017	0.286476	0.998783	-4.89296
P35276;P55258;P61027;P61028;P62821;Q6PHN9;Q91V41;Q9D1G1		-0.31818	16.3497	0.456947	0.653136	0.998783	-5.35189
P35276;P55258;P61028		-0.401027	15.1667	0.88306	0.387138	0.998783	-5.31733
P35278	Ras-related protein Rab-5C (EC 3.6.5.2)	0.185724	11.4746	-0.272644	0.78982	0.998783	-5.34758
P35278;P61021;Q9CQD1		-0.0346887	13.7349	0.0773702	0.939057	0.998783	-5.66816
P35279	Ras-related protein Rab-6A (Rab-6)	-0.0726339	14.0972	0.150543	0.881835	0.998783	-5.57793
P35282	Ras-related protein Rab-21 (Rab-12)	0.331635	12.0859	-0.386348	0.704286	0.998783	-5.07582
P35293	Ras-related protein Rab-18	-0.456356	12.412	1.01996	0.319846	0.998783	-5.13049
P35441	Thrombospondin-1 (Glycoprotein G)	-0.783617	13.3206	1.70338	0.103159	0.998783	-4.42248
P35486	Pyruvate dehydrogenase E1 component subunit alpha, somatic form, mitochondrial (EC 1.2.4.1) (PDHE1-A type I)	-0.328787	11.8078	0.618604	0.544967	0.998783	-5.49356
P35564	Calnexin	-0.104262	12.7249	0.151342	0.881889	0.998783	-5.48599
P35700	Peroxiredoxin-1 (EC 1.11.1.24) (Macrophage 23 kDa stress protein) (Osteoblast-specific factor 3) (OSF-3) (Thioredoxin peroxidase 2) (Thioredoxin-dependent peroxide reductase 2) (Thioredoxin-dependent peroxiredoxin 1)	0.171454	14.948	-0.3428	0.735135	0.998783	-5.61672
P35979	60S ribosomal protein L12	0.113653	12.6713	-0.197297	0.84579	0.998783	-5.42036
P35980	60S ribosomal protein L18	-0.0456865	14.1258	0.106869	0.915901	0.998783	-5.66565
P36552	Oxygen-dependent coproporphyrinogen-III oxidase, mitochondrial (COX) (Coprogen oxidase) (Coproporphyrinogenase) (EC 1.3.3.3)	0.326161	13.5809	-0.722115	0.478138	0.998783	-5.43289
P37040	NADPH--cytochrome P450 reductase (CPR) (P450R) (EC 1.6.2.4)	-0.378071	14.345	0.657428	0.518737	0.998783	-5.30207
P38060	Hydroxymethylglutaryl-CoA lyase, mitochondrial (HL) (HMG-CoA lyase) (EC 4.1.3.4) (3-hydroxy-3-methylglutarate-CoA lyase)	0.496185	12.0281	-0.797972	0.437997	0.998783	-5.21888
P38647	Stress-70 protein, mitochondrial (75 kDa glucose-regulated protein) (GRP-75) (Heat shock 70 kDa protein 9) (Mortalin) (Peptide-binding protein 74) (PBP74) (p66 MOT)	-0.203798	13.3776	0.372076	0.71407	0.998783	-5.60672
P39054	Dynamin-2 (EC 3.6.5.5) (Dynamin UDNM)	0.37001	12.2415	-0.427394	0.674741	0.998783	-5.06571
P40124	Adenylyl cyclase-associated protein 1 (CAP 1)	0.0912857	14.9347	-0.180417	0.858544	0.998783	-5.65588
P40142	Transketolase (TK) (EC 2.2.1.1) (P68)	-0.333526	15.742	0.587965	0.562787	0.998783	-5.5124
P40237	CD82 antigen (C33 antigen) (IA4) (Inducible membrane protein R2) (Metastasis suppressor Kangai-1 homolog) (CD antigen CD82)	0.249465	15.5432	-0.500379	0.621979	0.998783	-5.55583
P40336	Vacuolar protein sorting-associated protein 26A (H<beta>58 protein) (H beta 58) (Vesicle protein sorting 26A) (mVPS26)	0.179821	12.6497	-0.286784	0.777716	0.998783	-5.34501
P41731	CD63 antigen (CD antigen CD63)	0.19748	14.543	-0.432318	0.669889	0.998783	-5.58487
P42125	Enoyl-CoA delta isomerase 1, mitochondrial (EC 5.3.3.8) (3,2-trans-enoyl-CoA isomerase) (Delta(3),Delta(2)-enoyl-CoA isomerase) (D3,D2-enoyl-CoA isomerase) (Dodecenoyl-CoA isomerase)	-0.363254	11.8377	0.666929	0.513214	0.998783	-5.25244
P42669	Transcriptional activator protein Pur-alpha (Purine-rich single-stranded DNA-binding protein alpha)	0.0167294	12.7238	-0.0351527	0.972304	0.998783	-5.58763
P42932	T-complex protein 1 subunit theta (TCP-1-theta) (CCT-theta)	0.38285	12.618	-0.67035	0.511082	0.998783	-5.25053
P43137	Lithostathine-1 (Islet of Langerhans regenerating protein 1) (REG 1) (Pancreatic stone protein 1) (PSP) (Pancreatic thread protein 1) (PTP) (Regenerating protein 1)	1.11862	17.1234	-1.10358	0.295429	0.998783	-5.11632
P43274	Histone H1.4 (H1 VAR.2) (H1e)	1.28319	12.8343	-1.62928	0.121499	0.998783	-4.30945
P43276	Histone H1.5 (H1 VAR.5) (H1b)	-0.00206391	11.8232	0.0028314	0.99779	0.998783	-5.48961
P43406	Integrin alpha-V (Vitronectin receptor subunit alpha) (CD antigen CD51) [Cleaved into: Integrin alpha-V heavy chain; Integrin alpha-V light chain]	-0.251527	12.9917	0.493365	0.627093	0.998783	-5.48165
P45376	Aldo-keto reductase family 1 member B1 (EC 1.1.1.300) (EC 1.1.1.372) (EC 1.1.1.54) (Aldehyde reductase) (Aldo-keto reductase family 1 member B3) (Aldose reductase) (AR) (EC 1.1.1.21)	-0.186798	12.5617	0.412604	0.684257	0.998783	-5.51147
P45700	Mannosyl-oligosaccharide 1,2-alpha-mannosidase IA (EC 3.2.1.113) (Man(9)-alpha-mannosidase) (Man9-mannosidase) (Mannosidase alpha class 1A member 1) (Processing alpha-1,2-mannosidase IA) (Alpha-1,2-mannosidase IA)	-0.199335	13.3975	0.396974	0.695563	0.998783	-5.51714
P45952	Medium-chain specific acyl-CoA dehydrogenase, mitochondrial (MCAD) (EC 1.3.8.7)	-0.400304	16.4892	0.78533	0.440975	0.998783	-5.39009
P46471	26S proteasome regulatory subunit 7 (26S proteasome AAA-ATPase subunit RPT1) (Proteasome 26S subunit ATPase 2)	-0.325132	13.4221	0.503869	0.620106	0.998783	-5.27541
P46638	Ras-related protein Rab-11B (EC 3.6.5.2)	0.0082805	15.3524	-0.0172346	0.986411	0.998783	-5.67079
P46978	Dolichyl-diphosphooligosaccharide--protein glycosyltransferase subunit STT3A (Oligosaccharyl transferase subunit STT3A) (STT3-A) (EC 2.4.99.18) (B5) (Integral membrane protein 1)	-0.259348	12.7063	0.556782	0.583525	0.998783	-5.52864
P47738	Aldehyde dehydrogenase, mitochondrial (EC 1.2.1.3) (AHD-M1) (ALDH class 2) (ALDH-E2) (ALDHI)	-0.346508	15.6766	0.61128	0.547533	0.998783	-5.4997
P47739	Aldehyde dehydrogenase, dimeric NADP-preferring (EC 1.2.1.5) (Aldehyde dehydrogenase 4) (Aldehyde dehydrogenase family 3 member A1) (Dioxin-inducible aldehyde dehydrogenase 3)	-0.852524	12.8428	1.36553	0.192561	0.998783	-4.75549
P47739;P47740		0.617615	12.6946	-0.760996	0.457005	0.998783	-5.00098
P47740	Aldehyde dehydrogenase family 3 member A2 (EC 1.2.1.3) (EC 1.2.1.94) (Aldehyde dehydrogenase 3) (Fatty aldehyde dehydrogenase)	-0.455625	14.8541	0.913006	0.371538	0.998783	-5.29346
P47753	F-actin-capping protein subunit alpha-1 (CapZ alpha-1)	-0.134939	12.1729	0.276383	0.785217	0.998783	-5.51199
P47753;P47754		0.405639	12.5921	-0.647009	0.5262	0.998783	-5.20654
P47754	F-actin-capping protein subunit alpha-2 (CapZ alpha-2)	-0.0975707	13.116	0.183306	0.856486	0.998783	-5.53108
P47757	F-actin-capping protein subunit beta (CapZ beta)	0.32142	13.0222	-0.621309	0.541728	0.998783	-5.3753
P47791	Glutathione reductase, mitochondrial (GR) (GRase) (EC 1.8.1.7)	-0.21599	14.7726	0.410837	0.685328	0.998783	-5.59317
P47856	Glutamine--fructose-6-phosphate aminotransferase [isomerizing] 1 (EC 2.6.1.16) (D-fructose-6-phosphate amidotransferase 1) (Glutamine:fructose-6-phosphate amidotransferase 1) (GFAT 1) (GFAT1) (Hexosephosphate aminotransferase 1)	-0.216735	13.1548	0.371476	0.714587	0.998783	-5.52564
P47856;Q9Z2Z9		0.42033	13.0649	-0.61681	0.545469	0.998783	-5.22209
P47911	60S ribosomal protein L6 (TAX-responsive enhancer element-binding protein 107) (TAXREB107)	0.238066	13.4806	-0.540064	0.594798	0.998783	-5.53699
P47962	60S ribosomal protein L5	-0.0073805	13.2423	0.0170561	0.986552	0.998783	-5.6708
P47963	60S ribosomal protein L13 (A52)	0.21579	12.7903	-0.402676	0.692058	0.998783	-5.59559
P47964	60S ribosomal protein L36	1.07237	12.9408	-1.30779	0.20822	0.998783	-4.6043
P47968	Ribose-5-phosphate isomerase (EC 5.3.1.6) (Phosphoriboisomerase)	0.20035	11.35	-0.240765	0.81277	0.998783	-5.10731
P48036	Annexin A5 (Anchorin CII) (Annexin V) (Annexin-5) (Calphobindin I) (CPB-I) (Endonexin II) (Lipocortin V) (Placental anticoagulant protein 4) (PP4) (Placental anticoagulant protein I) (PAP-I) (Thromboplastin inhibitor) (Vascular anticoagulant-alpha) (VAC-alpha)	0.190683	14.8314	-0.414192	0.682907	0.998783	-5.5919
P48678	Prelamin-A/C [Cleaved into: Lamin-A/C]	-0.276978	13.5908	0.456529	0.653828	0.998783	-5.45286
P48758	Carbonyl reductase [NADPH] 1 (EC 1.1.1.184) (15-hydroxyprostaglandin dehydrogenase [NADP(+)]) (EC 1.1.1.196, EC 1.1.1.197) (20-beta-hydroxysteroid dehydrogenase) (Alcohol dehydrogenase [NAD(P)+] CBR1) (EC 1.1.1.71) (NADPH-dependent carbonyl reductase 1) (Prostaglandin 9-ketoreductase) (PG-9-KR) (Prostaglandin-E(2) 9-reductase) (EC 1.1.1.189)	-0.15474	13.793	0.314344	0.756494	0.998783	-5.54357
P48962	ADP/ATP translocase 1 (ADP,ATP carrier protein 1) (ADP,ATP carrier protein, heart/skeletal muscle isoform T1) (Adenine nucleotide translocator 1) (ANT 1) (Solute carrier family 25 member 4)	-0.157864	13.3464	0.355571	0.725686	0.998783	-5.61262
P48962;P51881		0.051721	16.5055	-0.0953855	0.924907	0.998783	-5.66672
P49290	Eosinophil peroxidase (EPO) (EC 1.11.1.7) [Cleaved into: Eosinophil peroxidase light chain; Eosinophil peroxidase heavy chain]	0.236034	11.683	-0.529822	0.602029	0.998783	-5.46207
P49722	Proteasome subunit alpha type-2 (Macropain subunit C3) (Multicatalytic endopeptidase complex subunit C3) (Proteasome component C3)	0.571229	13.0052	-1.11943	0.276133	0.998783	-5.04272
P49769	Presenilin-1 (PS-1) (EC 3.4.23.-) (Protein S182) [Cleaved into: Presenilin-1 NTF subunit; Presenilin-1 CTF subunit; Presenilin-1 CTF12 (PS1-CTF12)]	0.281493	14.2088	-0.653027	0.52078	0.998783	-5.47578
P49935	Pro-cathepsin H (Cathepsin B3) (Cathepsin BA) [Cleaved into: Cathepsin H mini chain; Cathepsin H (EC 3.4.22.16); Cathepsin H heavy chain; Cathepsin H light chain]	0.126396	13.4522	-0.260788	0.79678	0.998783	-5.63952
P50247	Adenosylhomocysteinase (AdoHcyase) (EC 3.13.2.1) (CUBP) (Liver copper-binding protein) (S-adenosyl-L-homocysteine hydrolase)	-0.306875	15.7465	0.599672	0.5551	0.998783	-5.50608
P50396	Rab GDP dissociation inhibitor alpha (Rab GDI alpha) (Guanosine diphosphate dissociation inhibitor 1) (GDI-1)	0.284594	11.5349	-0.493897	0.62765	0.998783	-5.27804
P50396;Q61598		0.47068	14.9462	-0.847261	0.407323	0.998783	-5.23156
P50428	Arylsulfatase A (ASA) (EC 3.1.6.8) (Cerebroside-sulfatase)	0.408523	12.9252	-0.843726	0.408271	0.998783	-5.34756
P50429	Arylsulfatase B (ASB) (EC 3.1.6.12) (N-acetylgalactosamine-4-sulfatase) (G4S)	-0.0467776	11.565	0.0881185	0.930748	0.998783	-5.43815
P50431	Serine hydroxymethyltransferase, cytosolic (SHMT) (EC 2.1.2.1) (Glycine hydroxymethyltransferase) (Serine methylase)	0.377289	13.4205	-0.726093	0.476138	0.998783	-5.35576
P50446	Keratin, type II cytoskeletal 6A (Cytokeratin-6A) (CK-6A) (Keratin-6-alpha) (mK6-alpha) (Keratin-6A) (K6A)	0.719934	12.9925	-1.40831	0.174294	0.998783	-4.73728
P50446;Q6IME9;Q922U2		0.66683	13.2806	-0.928088	0.364922	0.998783	-5.03048
P50446;Q922U2;Q9Z331		0.879393	16.9091	-1.27828	0.218195	0.998783	-4.88269
P50446;Q9Z331		0.778312	14.9212	-1.49402	0.149952	0.998783	-4.69488
P50516	V-type proton ATPase catalytic subunit A (V-ATPase subunit A) (EC 7.1.2.2) (V-ATPase 69 kDa subunit) (Vacuolar proton pump subunit alpha)	-0.159796	13.7764	0.334189	0.741693	0.998783	-5.53777
P50544	Very long-chain specific acyl-CoA dehydrogenase, mitochondrial (EC 1.3.8.9) (MVLCAD) (VLCAD)	-0.471247	13.4525	0.98877	0.333961	0.998783	-5.22984
P50580	Proliferation-associated protein 2G4 (IRES-specific cellular trans-acting factor 45 kDa) (ITAF45) (Mpp1) (Proliferation-associated protein 1) (Protein p38-2G4)	0.710649	12.748	-0.769924	0.452471	0.998783	-4.92617
P51150	Ras-related protein Rab-7a (EC 3.6.5.2)	-0.162734	14.0624	0.380785	0.707163	0.998783	-5.60409
P51162	Gastrotropin (GT) (Fatty acid-binding protein 6) (Ileal lipid-binding protein) (ILBP)	0.658001	14.9908	-1.18085	0.25193	0.998783	-5.04786
P51174	Long-chain specific acyl-CoA dehydrogenase, mitochondrial (LCAD) (EC 1.3.8.8)	-0.063749	14.889	0.135329	0.893632	0.998783	-5.66246
P51432	1-phosphatidylinositol 4,5-bisphosphate phosphodiesterase beta-3 (EC 3.1.4.11) (Phosphoinositide phospholipase C-beta-3) (Phospholipase C-beta-3) (PLC-beta-3)	-0.141288	12.7581	0.26422	0.794296	0.998783	-5.55663
P51569	Alpha-galactosidase A (EC 3.2.1.22) (Alpha-D-galactosidase A) (Alpha-D-galactoside galactohydrolase) (Galactosylgalactosylglucosylceramidase GLA) (Melibiase)	-0.510575	13.1809	1.09022	0.28789	0.998783	-5.13754
P51658	Estradiol 17-beta-dehydrogenase 2 (EC 1.1.1.62) (17-beta-hydroxysteroid dehydrogenase type 2) (17-beta-HSD 2) (Testosterone 17-beta-dehydrogenase) (EC 1.1.1.239)	1.15785	12.2723	-1.32979	0.202081	0.998783	-4.55428
P51660	Peroxisomal multifunctional enzyme type 2 (MFE-2) (17-beta-hydroxysteroid dehydrogenase 4) (17-beta-HSD 4) (D-bifunctional protein) (DBP) (Multifunctional protein 2) (MFP-2) [Cleaved into: (3R)-hydroxyacyl-CoA dehydrogenase (EC 1.1.1.n12); Enoyl-CoA hydratase 2 (EC 4.2.1.107) (EC 4.2.1.119) (3-alpha,7-alpha,12-alpha-trihydroxy-5-beta-cholest-24-enoyl-CoA hydratase)]	-0.544604	12.4622	1.03993	0.313064	0.998783	-5.18211
P51661	11-beta-hydroxysteroid dehydrogenase type 2 (11-DH2) (11-beta-HSD2) (EC 1.1.1.-) (Corticosteroid 11-beta-dehydrogenase isozyme 2) (NAD-dependent 11-beta-hydroxysteroid dehydrogenase)	0.77116	12.6075	-1.17954	0.257692	0.998783	-4.97925
P51670	C-C motif chemokine 9 (CCF18) (Macrophage inflammatory protein 1-gamma) (MIP-1-gamma) (Macrophage inflammatory protein-related protein 2) (MRP-2) (Small-inducible cytokine A9) [Cleaved into: CCL9(29-101); CCL9(30-101); CCL9(31-101)]	-0.187315	12.0958	0.382054	0.706424	0.998783	-5.52533
P51855	Glutathione synthetase (GSH synthetase) (GSH-S) (EC 6.3.2.3) (Glutathione synthase)	1.05684	12.2549	-1.69653	0.111348	0.998783	-4.34301
P51879	Oncomodulin (OM) (Parvalbumin beta)	0.170346	12.4685	-0.351612	0.728782	0.998783	-5.5324
P51881	ADP/ATP translocase 2 (ADP,ATP carrier protein 2) (Adenine nucleotide translocator 2) (ANT 2) (Solute carrier family 25 member 5) [Cleaved into: ADP/ATP translocase 2, N-terminally processed]	0.0744965	16.2663	-0.125657	0.901191	0.998783	-5.66363
P52196	Thiosulfate sulfurtransferase (EC 2.8.1.1) (Rhodanese)	-0.340148	12.9576	0.646889	0.52501	0.998783	-5.40091
P52480	Pyruvate kinase PKM (EC 2.7.1.40) (Pyruvate kinase muscle isozyme) (Threonine-protein kinase PKM2) (EC 2.7.11.1) (Tyrosine-protein kinase PKM2) (EC 2.7.10.2)	-0.217324	14.8456	0.376224	0.711315	0.998783	-5.60508
P52480;P53657		-0.332757	15.7051	0.643593	0.526762	0.998783	-5.48132
P52503	NADH dehydrogenase [ubiquinone] iron-sulfur protein 6, mitochondrial (Complex I-13kD-A) (CI-13kD-A) (NADH-ubiquinone oxidoreductase 13 kDa-A subunit)	1.04163	11.4065	-1.25165	0.228539	0.998783	-4.61633
P52624	Uridine phosphorylase 1 (UPase 1) (UrdPase 1) (EC 2.4.2.3)	0.901648	13.7898	-1.38347	0.187613	0.998783	-4.82813
P52787	Cobalamin binding intrinsic factor (Gastric intrinsic factor) (Intrinsic factor) (IF) (INF)	0.704052	13.7866	-1.25203	0.227667	0.998783	-4.97305
P52825	Carnitine O-palmitoyltransferase 2, mitochondrial (EC 2.3.1.21) (Carnitine palmitoyltransferase II) (CPT II)	-0.20037	12.9293	0.406079	0.688968	0.998783	-5.51386
P53026	60S ribosomal protein L10a (CSA-19) (Neural precursor cell expressed developmentally down-regulated protein 6) (NEDD-6)	-0.0487223	13.7369	0.0775766	0.939014	0.998783	-5.43448
P53657	Pyruvate kinase PKLR (EC 2.7.1.40) (L-PK) (Pyruvate kinase isozymes L/R)	0.928096	11.6087	-1.27762	0.218422	0.998783	-4.64263
P53810	Phosphatidylinositol transfer protein alpha isoform (PI-TP-alpha) (PtdIns transfer protein alpha) (PtdInsTP alpha)	0.172687	12.0248	-0.374096	0.712134	0.998783	-5.60635
P53986	Monocarboxylate transporter 1 (MCT 1) (Solute carrier family 16 member 1)	-0.327211	12.6224	0.586359	0.565699	0.998783	-5.51154
P53994	Ras-related protein Rab-2A (EC 3.6.5.2)	-0.557003	13.47	1.16768	0.255941	0.998783	-5.06175
P54071	Isocitrate dehydrogenase [NADP], mitochondrial (IDH) (EC 1.1.1.42) (ICD-M) (IDP) (NADP(+)-specific ICDH) (Oxalosuccinate decarboxylase)	-0.202099	13.8496	0.451845	0.655983	0.998783	-5.57696
P54116	Stomatin (Erythrocyte band 7 integral membrane protein) (Erythrocyte membrane protein band 7.2) (Protein 7.2b)	0.176477	15.4893	-0.354814	0.726245	0.998783	-5.61287
P54775	26S proteasome regulatory subunit 6B (26S proteasome AAA-ATPase subunit RPT3) (CIP21) (MB67-interacting protein) (MIP224) (Proteasome 26S subunit ATPase 4) (Tat-binding protein 7) (TBP-7)	-0.857348	12.7768	1.45995	0.160529	0.998783	-4.61166
P54818	Galactocerebrosidase (GALCERase) (EC 3.2.1.46) (Galactocerebroside beta-galactosidase) (Galactosylceramidase) (Galactosylceramide beta-galactosidase)	-0.273015	12.5077	0.58696	0.563755	0.998783	-5.43368
P54823	Probable ATP-dependent RNA helicase DDX6 (EC 3.6.4.13) (ATP-dependent RNA helicase p54) (DEAD box protein 6) (Oncogene RCK homolog)	-0.018405	10.8043	0.0224594	0.982357	0.998783	-5.12725
P54869	Hydroxymethylglutaryl-CoA synthase, mitochondrial (HMG-CoA synthase) (EC 2.3.3.10) (3-hydroxy-3-methylglutaryl coenzyme A synthase)	-0.319395	14.6866	0.620034	0.541864	0.998783	-5.49481
P54869;Q8JZK9		-0.428535	14.25	0.876114	0.390817	0.998783	-5.32276
P55050	Fatty acid-binding protein, intestinal (Fatty acid-binding protein 2) (Intestinal-type fatty acid-binding protein) (I-FABP)	-0.0624923	12.8545	0.10431	0.918009	0.998783	-5.4842
P55258	Ras-related protein Rab-8A (EC 3.6.5.2) (Oncogene c-mel)	-0.628363	12.0143	0.736125	0.472222	0.998783	-4.94424
P55264	Adenosine kinase (AK) (EC 2.7.1.20) (Adenosine 5'-phosphotransferase)	-0.922135	12.6558	1.47073	0.15949	0.998783	-4.53683
P55292	Desmocollin-2 (Epithelial type 2 desmocollin)	0.309201	14.2441	-0.713012	0.483637	0.998783	-5.43878
P56135	ATP synthase subunit f, mitochondrial (ATP synthase membrane subunit f)	-0.19667	13.4036	0.273633	0.788543	0.998783	-5.55358
P56382	ATP synthase subunit epsilon, mitochondrial (ATPase subunit epsilon) (ATP synthase F1 subunit epsilon)	-0.412504	14.825	0.746971	0.464161	0.998783	-5.30047
P56391	Cytochrome c oxidase subunit 6B1 (Cytochrome c oxidase subunit VIb isoform 1) (COX VIb-1)	-0.146992	12.6095	0.280637	0.782001	0.998783	-5.51094
P56395	Cytochrome b5	0.812546	12.8189	-1.37674	0.185352	0.998783	-4.67245
P56480	ATP synthase subunit beta, mitochondrial (EC 7.1.2.2) (ATP synthase F1 subunit beta)	-0.346852	17.0276	0.529298	0.603502	0.998783	-5.541
P56528	ADP-ribosyl cyclase/cyclic ADP-ribose hydrolase 1 (EC 3.2.2.6) (2'-phospho-ADP-ribosyl cyclase) (2'-phospho-ADP-ribosyl cyclase/2'-phospho-cyclic-ADP-ribose transferase) (EC 2.4.99.20) (2'-phospho-cyclic-ADP-ribose transferase) (ADP-ribosyl cyclase 1) (ADPRC 1) (Cyclic ADP-ribose hydrolase 1) (cADPr hydrolase 1) (I-19) (NIM-R5 antigen) (CD antigen CD38)	-0.602645	12.325	1.25078	0.225776	0.998783	-4.97511
P56677	Suppressor of tumorigenicity 14 protein homolog (EC 3.4.21.109) (Epithin) (Serine protease 14)	0.247567	14.2223	-0.562969	0.57938	0.998783	-5.52548
P57096	Prostate stem cell antigen	1.00997	15.2693	-1.88975	0.0725872	0.998783	-4.15843
P57716	Nicastrin	0.159115	16.3415	-0.301246	0.766171	0.998783	-5.62904
P57759	Endoplasmic reticulum resident protein 29 (ERp29)	-0.0540075	12.5155	0.0970532	0.923749	0.998783	-5.43711
P57780	Alpha-actinin-4 (Non-muscle alpha-actinin 4)	0.172374	13.1195	-0.281317	0.782107	0.998783	-5.63386
P57780;Q7TPR4		-0.00259425	13.6342	0.00541448	0.995731	0.998783	-5.67092
P57780;Q7TPR4;Q9JI91		0.291588	12.9958	-0.642635	0.527372	0.998783	-5.48188
P58021	Transmembrane 9 superfamily member 2	-0.450153	13.1893	0.958508	0.348644	0.998783	-5.2558
P58044	Isopentenyl-diphosphate Delta-isomerase 1 (EC 5.3.3.2) (Isopentenyl pyrophosphate isomerase 1) (IPP isomerase 1) (IPPI1)	0.0279313	12.6043	-0.0530304	0.958257	0.998783	-5.48773
P58242	Acid sphingomyelinase-like phosphodiesterase 3b (ASM-like phosphodiesterase 3b) (EC 3.1.4.-)	0.416374	17.2924	-0.768611	0.450628	0.998783	-5.40174
P58252	Elongation factor 2 (EF-2)	0.0803882	14.9081	-0.174787	0.862911	0.998783	-5.65681
P59108	Copine-2 (Copine II)	0.543034	13.3097	-1.1658	0.256683	0.998783	-5.06364
P59108;Q0VE82;Q8BT60		0.09848	13.4557	-0.217113	0.830203	0.998783	-5.64915
P59999	Actin-related protein 2/3 complex subunit 4 (Arp2/3 complex 20 kDa subunit) (p20-ARC)	-0.256997	13.1409	0.545605	0.59105	0.998783	-5.53425
P60710;P63260		-0.14339	18.3039	0.193759	0.848853	0.998783	-5.65331
P60710;P63260;Q8BFZ3		-0.235193	17.7327	0.411518	0.684836	0.998783	-5.59291
P60766	Cell division control protein 42 homolog (EC 3.6.5.2) (G25K GTP-binding protein)	0.448528	13.4919	-0.850498	0.405049	0.998783	-5.2699
P60766;P63001;P84096		0.386977	14.197	-0.830697	0.415431	0.998783	-5.3573
P60867	40S ribosomal protein S20	-0.0761534	12.2114	0.127752	0.899797	0.998783	-5.43004
P61027	Ras-related protein Rab-10 (EC 3.6.5.2)	0.730895	11.7959	-1.38264	0.183566	0.998783	-4.66623
P61079;P62838;Q6ZWY6	Ubiquitin-conjugating enzyme E2 D3 (EC 2.3.2.23) ((E3-independent) E2 ubiquitin-conjugating enzyme D3) (EC 2.3.2.24) (E2 ubiquitin-conjugating enzyme D3) (Ubiquitin carrier protein D3) (Ubiquitin-conjugating enzyme E2(17)KB 3) (Ubiquitin-conjugating enzyme E2-17 kDa 3) (Ubiquitin-protein ligase D3)	-0.06766	12.1415	0.0785777	0.938335	0.998783	-5.12528
P61089	Ubiquitin-conjugating enzyme E2 N (EC 2.3.2.23) (Bendless-like ubiquitin-conjugating enzyme) (E2 ubiquitin-conjugating enzyme N) (Ubc13) (Ubiquitin carrier protein N) (Ubiquitin-protein ligase N)	0.608285	11.2826	-1.15271	0.263999	0.998783	-4.89287
P61161	Actin-related protein 2 (Actin-like protein 2)	0.0380267	12.8831	-0.0711246	0.944037	0.998783	-5.54384
P61164;Q8R5C5		0.65051	11.9958	-0.893235	0.384105	0.998783	-4.93264
P61205;P84078	ADP-ribosylation factor 3	-0.0978093	15.0405	0.210125	0.835582	0.998783	-5.65052
P61222	ATP-binding cassette sub-family E member 1 (RNase L inhibitor) (Ribonuclease 4 inhibitor) (RNS4I)	0.348533	11.8731	-0.409458	0.687588	0.998783	-5.06951
P61255	60S ribosomal protein L26 (Silica-induced gene 20 protein) (SIG-20)	-0.061899	14.2161	0.135201	0.893732	0.998783	-5.66248
P61327;Q9CQL1	Protein mago nashi homolog	-0.109243	12.6386	0.228358	0.821671	0.998783	-5.56461
P61358	60S ribosomal protein L27	0.700102	13.1178	-1.30203	0.208361	0.998783	-4.7925
P61514	60S ribosomal protein L37a	0.912277	12.1298	-1.79295	0.088804	0.998783	-4.20798
P61620	Protein transport protein Sec61 subunit alpha isoform 1 (Sec61 alpha-1)	-1.0225	12.9204	2.13304	0.0448045	0.998783	-3.78676
P61750	ADP-ribosylation factor 4	0.0957785	13.6627	-0.21861	0.829051	0.998783	-5.64884
P61750;P84084		-0.135271	15.1409	0.286012	0.777654	0.998783	-5.63316
P61804	Dolichyl-diphosphooligosaccharide--protein glycosyltransferase subunit DAD1 (Oligosaccharyl transferase subunit DAD1) (Defender against cell death 1) (DAD-1)	-0.887704	13.0692	1.53943	0.140843	0.998783	-4.58306
P61922	4-aminobutyrate aminotransferase, mitochondrial (EC 2.6.1.19) ((S)-3-amino-2-methylpropionate transaminase) (EC 2.6.1.22) (GABA aminotransferase) (GABA-AT) (Gamma-amino-N-butyrate transaminase) (GABA transaminase) (GABA-T) (L-AIBAT)	-0.134818	14.9608	0.288519	0.77576	0.998783	-5.63249
P61965	WD repeat-containing protein 5 (BMP2-induced 3-kb gene protein) (WD repeat-containing protein BIG-3)	0.362028	13.2573	-0.784197	0.441625	0.998783	-5.39088
P61979	Heterogeneous nuclear ribonucleoprotein K (hnRNP K)	-0.0985329	11.726	0.137355	0.892879	0.998783	-5.37133
P61982	14-3-3 protein gamma [Cleaved into: 14-3-3 protein gamma, N-terminally processed]	-0.0334642	12.861	0.0568402	0.955294	0.998783	-5.43313
P62071	Ras-related protein R-Ras2 (EC 3.6.5.-)	-0.33134	13.1779	0.586583	0.564116	0.998783	-5.43378
P62137	Serine/threonine-protein phosphatase PP1-alpha catalytic subunit (PP-1A) (EC 3.1.3.16)	-0.332776	13.2141	0.651538	0.522067	0.998783	-5.39824
P62137;P62141;P63087		0.423089	12.755	-0.812524	0.425994	0.998783	-5.29744
P62141	Serine/threonine-protein phosphatase PP1-beta catalytic subunit (PP-1B) (EC 3.1.3.16) (EC 3.1.3.53)	0.155819	14.4926	-0.329638	0.744918	0.998783	-5.62079
P62196	26S proteasome regulatory subunit 8 (26S proteasome AAA-ATPase subunit RPT6) (Proteasome 26S subunit ATPase 5) (Proteasome subunit p45) (p45/SUG) (mSUG1)	-0.416096	13.8405	0.875781	0.390994	0.998783	-5.32302
P62242	40S ribosomal protein S8	0.233609	13.2821	-0.428115	0.673112	0.998783	-5.50562
P62245	40S ribosomal protein S15a	0.461283	12.6064	-0.9482	0.35485	0.998783	-5.15421
P62259	14-3-3 protein epsilon (14-3-3E)	0.12863	15.1978	-0.246427	0.807847	0.998783	-5.56073
P62264	40S ribosomal protein S14	-0.3262	14.0237	0.666102	0.512552	0.998783	-5.46798
P62267	40S ribosomal protein S23	-0.431558	11.6048	0.513138	0.614809	0.998783	-5.03682
P62270	40S ribosomal protein S18 (Ke-3) (Ke3)	-0.124688	14.7461	0.274936	0.786035	0.998783	-5.63602
P62274	40S ribosomal protein S29	0.0278232	12.8764	-0.0491997	0.96127	0.998783	-5.4879
P62281	40S ribosomal protein S11	-0.281626	12.6674	0.589507	0.562078	0.998783	-5.43235
P62301	40S ribosomal protein S13	0.324988	13.4024	-0.400033	0.694075	0.998783	-5.16634
P62307	Small nuclear ribonucleoprotein F (snRNP-F) (Sm protein F) (Sm-F) (SmF)	0.339191	11.8999	-0.774117	0.447435	0.998783	-5.39793
P62309	Small nuclear ribonucleoprotein G (snRNP-G) (Sm protein G) (Sm-G) (SmG)	0.585321	12.3764	-1.44358	0.163517	0.998783	-4.75636
P62311	U6 snRNA-associated Sm-like protein LSm3	0.29737	11.1216	-0.579603	0.569314	0.998783	-5.29813
P62313	U6 snRNA-associated Sm-like protein LSm6	0.258976	13.0392	-0.434769	0.66886	0.998783	-5.35664
P62317	Small nuclear ribonucleoprotein Sm D2 (Sm-D2) (snRNP core protein D2)	-0.176727	13.2484	0.400497	0.69281	0.998783	-5.59702
P62320	Small nuclear ribonucleoprotein Sm D3 (Sm-D3) (snRNP core protein D3)	-0.390304	13.6003	0.769938	0.450276	0.998783	-5.32416
P62331	ADP-ribosylation factor 6 (EC 3.6.5.2)	-0.23476	13.3071	0.499328	0.622706	0.998783	-5.55631
P62342	Thioredoxin reductase-like selenoprotein T (SelT) (EC 1.8.1.9)	-0.187141	11.5238	0.223331	0.826081	0.998783	-5.11011
P62702	40S ribosomal protein S4, X isoform	0.146501	12.4422	-0.287088	0.777131	0.998783	-5.50931
P62717	60S ribosomal protein L18a	1.58164	11.6342	-1.55248	0.158158	0.998783	-4.4017
P62737;P68033	Actin, aortic smooth muscle (EC 3.6.4.-) (Alpha-actin-2) [Cleaved into: Actin, aortic smooth muscle, intermediate form]	-0.107609	18.2579	0.188096	0.852595	0.998783	-5.65457
P62746	Rho-related GTP-binding protein RhoB	-0.421556	13.4396	0.695112	0.495796	0.998783	-5.23641
P62746;Q62159;Q9QUI0		-0.117795	11.8849	0.240472	0.812522	0.998783	-5.47083
P62748	Hippocalcin-like protein 1 (Neural visinin-like protein 3) (NVL-3) (NVP-3) (Visinin-like protein 3) (VILIP-3)	0.0611335	11.8172	-0.137694	0.891786	0.998783	-5.66216
P62751	60S ribosomal protein L23a	-0.16767	15.2894	0.367165	0.717147	0.998783	-5.60877
P62754	40S ribosomal protein S6 (Phosphoprotein NP33)	0.273978	12.9202	-0.449838	0.658158	0.998783	-5.35463
P62806	Histone H4	0.604576	19.6275	-1.0909	0.287597	0.998783	-5.13689
P62814	V-type proton ATPase subunit B, brain isoform (V-ATPase subunit B 2) (Endomembrane proton pump 58 kDa subunit) (Vacuolar proton pump subunit B 2)	-0.278826	12.679	0.488879	0.630484	0.998783	-5.38501
P62821	Ras-related protein Rab-1A (EC 3.6.5.2) (YPT1-related protein)	-0.0296557	12.9577	0.0500416	0.960664	0.998783	-5.54498
P62821;Q9D1G1		0.388279	15.6553	-0.723247	0.477847	0.998783	-5.35476
P62827	GTP-binding nuclear protein Ran (EC 3.6.5.-) (GTPase Ran) (Ras-like protein TC4) (Ras-related nuclear protein)	-0.0333263	13.9091	0.0787123	0.938002	0.998783	-5.66806
P62827;Q61820		-0.272812	14.0624	0.63677	0.531112	0.998783	-5.48528
P62830	60S ribosomal protein L23	-0.0640307	12.4391	0.148389	0.883442	0.998783	-5.66075
P62835	Ras-related protein Rap-1A (EC 3.6.5.2) (Ras-related protein Krev-1)	1.59383	11.6896	-1.88738	0.0772324	0.998783	-4.047
P62835;Q99JI6		-0.19569	14.6683	0.409114	0.686572	0.998783	-5.59382
P62843	40S ribosomal protein S15 (RIG protein)	-0.0636301	12.2005	0.0889044	0.930189	0.998783	-5.2348
P62849	40S ribosomal protein S24	0.257928	10.5199	-0.280131	0.784058	0.998783	-5.09974
P62852	40S ribosomal protein S25	-0.211354	14.2458	0.482377	0.634496	0.998783	-5.56391
P62858	40S ribosomal protein S28	-0.0641412	12.9496	0.120873	0.90499	0.998783	-5.58157
P62874	Guanine nucleotide-binding protein G(I)/G(S)/G(T) subunit beta-1 (Transducin beta chain 1)	0.986381	14.107	-2.01928	0.05697	0.998783	-3.92909
P62874;P62880		0.432932	15.8284	-0.830035	0.415797	0.998783	-5.35779
P62880	Guanine nucleotide-binding protein G(I)/G(S)/G(T) subunit beta-2 (G protein subunit beta-2) (Transducin beta chain 2)	0.271313	14.2423	-0.561498	0.580364	0.998783	-5.52624
P62889	60S ribosomal protein L30	0.0395465	13.9717	-0.0910134	0.928339	0.998783	-5.6671
P62897	Cytochrome c, somatic	-0.392135	15.8515	0.757766	0.456958	0.998783	-5.40917
P62900	60S ribosomal protein L31	0.054818	13.5579	-0.120113	0.905528	0.998783	-5.66426
P62908	40S ribosomal protein S3 (EC 4.2.99.18)	0.0019655	14.8555	-0.00424516	0.996653	0.998783	-5.67092
P62918	60S ribosomal protein L8	-0.289668	13.646	0.632675	0.533732	0.998783	-5.48763
P62960	Y-box-binding protein 1 (YB-1) (CCAAT-binding transcription factor I subunit A) (CBF-A) (DNA-binding protein B) (DBPB) (Enhancer factor I subunit A) (EFI-A) (Nuclease-sensitive element-binding protein 1) (Y-box transcription factor)	1.8084	9.30586	-2.21474	0.0415076	0.998783	-3.70656
P62962	Profilin-1 (Profilin I)	0.290608	12.5052	-0.410368	0.689141	0.998783	-5.59066
P62983	Ubiquitin-40S ribosomal protein S27a (Ubiquitin carboxyl extension protein 80) [Cleaved into: Ubiquitin; 40S ribosomal protein S27a]	-0.132503	17.7401	0.257993	0.798907	0.998783	-5.64018
P63001	Ras-related C3 botulinum toxin substrate 1 (EC 3.6.5.2) (p21-Rac1)	0.102016	15.1103	-0.189631	0.851408	0.998783	-5.65431
P63017	Heat shock cognate 71 kDa protein (EC 3.6.4.10) (Heat shock 70 kDa protein 8)	0.0339417	15.6658	-0.0679496	0.946465	0.998783	-5.6688
P63028	Translationally-controlled tumor protein (TCTP) (21 kDa polypeptide) (p21) (p23)	0.118497	11.5099	-0.168052	0.86851	0.998783	-5.21653
P63038	60 kDa heat shock protein, mitochondrial (EC 5.6.1.7) (60 kDa chaperonin) (Chaperonin 60) (CPN60) (HSP-65) (Heat shock protein 60) (HSP-60) (Hsp60) (Mitochondrial matrix protein P1)	-0.328132	14.7537	0.639406	0.529429	0.998783	-5.48375
P63085	Mitogen-activated protein kinase 1 (MAP kinase 1) (MAPK 1) (EC 2.7.11.24) (ERT1) (Extracellular signal-regulated kinase 2) (ERK-2) (MAP kinase isoform p42) (p42-MAPK) (Mitogen-activated protein kinase 2) (MAP kinase 2) (MAPK 2)	-1.08946	12.373	1.23339	0.235097	0.998783	-4.62897
P63085;Q63844		-0.120504	12.0095	0.199844	0.843955	0.998783	-5.36266
P63087	Serine/threonine-protein phosphatase PP1-gamma catalytic subunit (PP-1G) (EC 3.1.3.16) (Protein phosphatase 1C catalytic subunit)	1.24446	12.4763	-1.39336	0.18241	0.998783	-4.50233
P63094;Q6R0H7	Guanine nucleotide-binding protein G(s) subunit alpha isoforms short (Adenylate cyclase-stimulating G alpha protein)	-0.0769009	11.8771	0.124825	0.902393	0.998783	-5.48203
P63101	14-3-3 protein zeta/delta (Protein kinase C inhibitor protein 1) (KCIP-1) (SEZ-2)	0.00243375	14.5213	-0.00384207	0.996984	0.998783	-5.67092
P63101;P68254;Q9CQV8		1.07717	13.6115	-1.31881	0.204589	0.998783	-4.6059
P63158	High mobility group protein B1 (High mobility group protein 1) (HMG-1)	-0.365548	13.9293	0.790064	0.438266	0.998783	-5.38675
P63163	Small nuclear ribonucleoprotein-associated protein N (snRNP-N) (Sm protein D) (Sm-D) (Sm protein N) (Sm-N) (SmN) (Tissue-specific-splicing protein)	-0.379761	13.4649	0.742943	0.466097	0.998783	-5.34742
P63276	40S ribosomal protein S17	0.441742	11.627	-0.758619	0.458389	0.998783	-5.14306
P63321	Ras-related protein Ral-A (EC 3.6.5.2)	-0.18196	11.5732	0.232209	0.819359	0.998783	-5.20589
P63321;Q9JIW9		0.294548	15.1604	-0.402225	0.69222	0.998783	-5.31312
P63325	40S ribosomal protein S10	1.30221	11.3385	-1.77068	0.094516	0.998783	-4.16084
P63328	Protein phosphatase 3 catalytic subunit alpha (EC 3.1.3.16) (CAM-PRP catalytic subunit) (Calcineurin A alpha) (Calmodulin-dependent calcineurin A subunit alpha isoform) (CNA alpha) (Serine/threonine-protein phosphatase 2B catalytic subunit alpha isoform)	-1.56859	12.3828	1.69456	0.108254	0.998783	-4.23285
P63330	Serine/threonine-protein phosphatase 2A catalytic subunit alpha isoform (PP2A-alpha) (EC 3.1.3.16)	0.0913439	12.2367	-0.160853	0.873988	0.998783	-5.43037
P67778	Prohibitin 1 (B-cell receptor-associated protein 32) (BAP 32)	-0.553373	13.1362	0.837148	0.416344	0.998783	-5.2358
P67871	Casein kinase II subunit beta (CK II beta) (Phosvitin)	-0.679583	11.5288	1.51608	0.145041	0.998783	-4.61218
P67984	60S ribosomal protein L22 (Heparin-binding protein HBp15)	-0.105379	13.5949	0.232191	0.818623	0.998783	-5.64602
P68040	Receptor of activated protein C kinase 1 (12-3) (Guanine nucleotide-binding protein subunit beta-2-like 1) (Receptor for activated C kinase) (Receptor of activated protein kinase C 1) (p205) [Cleaved into: Receptor of activated protein C kinase 1, N-terminally processed (Guanine nucleotide-binding protein subunit beta-2-like 1, N-terminally processed)]	0.0894053	13.8703	-0.196379	0.84619	0.998783	-5.6531
P68254	14-3-3 protein theta (14-3-3 protein tau)	-0.308148	11.5615	0.322868	0.752422	0.998783	-5.09061
P68368	Tubulin alpha-4A chain (EC 3.6.5.-) (Alpha-tubulin 4) (Alpha-tubulin isotype M-alpha-4) (Tubulin alpha-4 chain)	0.197316	12.4015	-0.391765	0.699561	0.998783	-5.47773
P68368;P68373		0.0871077	14.144	-0.201862	0.841955	0.998783	-5.6521
P68372	Tubulin beta-4B chain (Tubulin beta-2C chain)	0.355066	13.0808	-0.611916	0.547796	0.998783	-5.38037
P68372;P99024		0.235145	12.8276	-0.489639	0.629433	0.998783	-5.56068
P68372;P99024;Q922F4		0.34011	12.6841	-0.692296	0.496658	0.998783	-5.37405
P68373	Tubulin alpha-1C chain (EC 3.6.5.-) (Alpha-tubulin 6) (Alpha-tubulin isotype M-alpha-6) (Tubulin alpha-6 chain) [Cleaved into: Detyrosinated tubulin alpha-1C chain]	0.271203	13.252	-0.581069	0.56734	0.998783	-5.51606
P68510	14-3-3 protein eta	0.179252	12.4601	-0.356129	0.725641	0.998783	-5.48955
P70158	Acid sphingomyelinase-like phosphodiesterase 3a (ASM-like phosphodiesterase 3a) (EC 3.1.4.-)	0.287735	14.542	-0.655438	0.519257	0.998783	-5.47436
P70168	Importin subunit beta-1 (Karyopherin subunit beta-1) (Nuclear factor p97) (Pore targeting complex 97 kDa subunit) (PTAC97) (SCG)	0.257335	12.2114	-0.29727	0.770054	0.998783	-5.0968
P70195	Proteasome subunit beta type-7 (EC 3.4.25.1) (Macropain chain Z) (Multicatalytic endopeptidase complex chain Z) (Proteasome subunit Z)	0.318349	13.6281	-0.316293	0.757451	0.998783	-5.16406
P70202	Latexin (Endogenous carboxypeptidase inhibitor) (ECI) (Tissue carboxypeptidase inhibitor) (TCI)	0.166304	13.7003	-0.372059	0.713553	0.998783	-5.60711
P70296	Phosphatidylethanolamine-binding protein 1 (PEBP-1) (HCNPpp) [Cleaved into: Hippocampal cholinergic neurostimulating peptide (HCNP)]	-0.12914	12.7948	0.22657	0.823586	0.998783	-5.64689
P70302	Stromal interaction molecule 1	-0.833934	11.6717	1.79996	0.0876547	0.998783	-4.22265
P70349	Adenosine 5'-monophosphoramidase HINT1 (EC 3.9.1.-) (Desumoylating isopeptidase HINT1) (EC 3.4.22.-) (Histidine triad nucleotide-binding protein 1) (Protein kinase C inhibitor 1) (Protein kinase C-interacting protein 1) (PKCI-1)	0.691598	12.9166	-0.850872	0.406574	0.998783	-4.95791
P70404	Isocitrate dehydrogenase [NAD] subunit gamma 1, mitochondrial (Isocitric dehydrogenase subunit gamma) (NAD(+)-specific ICDH subunit gamma)	0.011576	13.278	-0.0140826	0.988927	0.998783	-5.22664
P70412	CUB and zona pellucida-like domain-containing protein 1 (CUB and ZP domain-containing protein 1) (Integral membrane-associated protein 1)	0.827381	19.4232	-1.50278	0.147692	0.998783	-4.68403
P70441	Na(+)/H(+) exchange regulatory cofactor NHE-RF1 (NHERF-1) (Ezrin-radixin-moesin-binding phosphoprotein 50) (EBP50) (Regulatory cofactor of Na(+)/H(+) exchanger) (Sodium-hydrogen exchanger regulatory factor 1) (Solute carrier family 9 isoform A3 regulatory factor 1)	-0.216679	15.4351	0.402917	0.691056	0.998783	-5.59613
P70665	Sialate O-acetylesterase (EC 3.1.1.53) (Sialic acid-specific 9-O-acetylesterase) (Yolk sac protein 2) [Cleaved into: Sialate O-acetylesterase small subunit; Sialate O-acetylesterase large subunit]	0.907989	15.0826	-1.87004	0.0753947	0.998783	-4.18725
P70670	Nascent polypeptide-associated complex subunit alpha, muscle-specific form (Alpha-NAC, muscle-specific form) (skNAC)	-0.748381	11.6623	1.39898	0.177821	0.998783	-4.68424
P70677	Caspase-3 (CASP-3) (EC 3.4.22.56) (Apopain) (Cysteine protease CPP32) (CPP-32) (LICE) (Protein Yama) (SREBP cleavage activity 1) (SCA-1) [Cleaved into: Caspase-3 subunit p17; Caspase-3 subunit p12]	0.544567	14.6473	-1.13471	0.269202	0.998783	-5.09456
P70695	Fructose-1,6-bisphosphatase isozyme 2 (FBPase 2) (EC 3.1.3.11) (D-fructose-1,6-bisphosphate 1-phosphohydrolase 2) (Muscle FBPase) (RAE-30)	0.351898	12.7017	-0.688951	0.499124	0.998783	-5.33663
P70696	Histone H2B type 1-A (Histone H2B, testis) (Testis-specific histone H2B)	0.842701	16.2171	-1.15886	0.264065	0.998783	-5.06813
P80313	T-complex protein 1 subunit eta (TCP-1-eta) (CCT-eta)	0.0583794	12.4645	-0.0656088	0.948495	0.998783	-5.12737
P80314	T-complex protein 1 subunit beta (TCP-1-beta) (CCT-beta)	0.498881	12.4566	-0.611113	0.550784	0.998783	-5.08572
P80316	T-complex protein 1 subunit epsilon (TCP-1-epsilon) (CCT-epsilon)	0.177583	12.1763	-0.304379	0.764304	0.998783	-5.4014
P80318	T-complex protein 1 subunit gamma (TCP-1-gamma) (CCT-gamma) (Matricin) (mTRiC-P5)	0.049526	11.3807	-0.0780971	0.938917	0.998783	-5.37677
P83882	60S ribosomal protein L36a (60S ribosomal protein L44)	-0.0598334	12.0595	0.109287	0.914346	0.998783	-5.58271
P84084	ADP-ribosylation factor 5	0.302302	12.6491	-0.693599	0.495487	0.998783	-5.45109
P84091	AP-2 complex subunit mu (AP-2 mu chain) (Adaptor protein complex AP-2 subunit mu) (Adaptor-related protein complex 2 subunit mu) (Clathrin assembly protein complex 2 mu medium chain) (Clathrin coat assembly protein AP50) (Clathrin coat-associated protein AP50) (Mu2-adaptin) (Plasma membrane adaptor AP-2 50 kDa protein)	0.725362	15.5903	-1.00617	0.328865	0.998783	-5.0633
P84099	60S ribosomal protein L19	0.757382	12.2065	-1.07707	0.302892	0.998783	-4.90903
P97290	Plasma protease C1 inhibitor (C1 Inh) (C1Inh) (C1 esterase inhibitor) (C1-inhibiting factor) (Serpin G1)	0.0663176	11.8452	-0.0900984	0.929197	0.998783	-5.19935
P97300	Neuroplastin (Stromal cell-derived receptor 1) (SDR-1)	-0.419564	15.5441	0.812556	0.425531	0.998783	-5.37061
P97315	Cysteine and glycine-rich protein 1 (Cysteine-rich protein 1) (CRP) (CRP1)	-0.141696	11.9636	0.169393	0.867472	0.998783	-5.11966
P97351	40S ribosomal protein S3a (Protein TU-11)	-0.342019	13.1623	0.597786	0.556992	0.998783	-5.38734
P97352	Protein S100-A13 (S100 calcium-binding protein A13)	-0.429817	12.3051	0.492788	0.628801	0.998783	-5.04511
P97363	Serine palmitoyltransferase 2 (EC 2.3.1.50) (Long chain base biosynthesis protein 2) (LCB 2) (Long chain base biosynthesis protein 2a) (LCB2a) (Serine-palmitoyl-CoA transferase 2) (SPT 2)	0.133311	11.7079	-0.157716	0.876638	0.998783	-5.11878
P97384	Annexin A11 (Annexin XI) (Annexin-11) (Calcyclin-associated annexin 50) (CAP-50)	0.465413	16.7772	-0.937067	0.359309	0.998783	-5.27375
P97429	Annexin A4 (Annexin IV) (Annexin-4)	0.489326	19.1895	-0.888981	0.38402	0.998783	-5.31266
P97430	Antileukoproteinase (ALP) (Secretory leukocyte protease inhibitor)	-0.145067	12.2419	0.362314	0.720715	0.998783	-5.61039
P97435	Enteropeptidase (EC 3.4.21.9) (Enterokinase) (Serine protease 7) (Transmembrane protease serine 15) [Cleaved into: Enteropeptidase non-catalytic heavy chain; Enteropeptidase catalytic light chain]	1.08073	15.8539	-2.09477	0.0484171	0.998783	-3.84708
P97447	Four and a half LIM domains protein 1 (FHL-1) (KyoT) (RBP-associated molecule 14-1) (RAM14-1) (Skeletal muscle LIM-protein 1) (SLIM) (SLIM-1)	0.242173	13.34	-0.490397	0.628906	0.998783	-5.56034
P97449	Aminopeptidase N (AP-N) (mAPN) (EC 3.4.11.2) (Alanyl aminopeptidase) (Aminopeptidase M) (AP-M) (Membrane protein p161) (Microsomal aminopeptidase) (CD antigen CD13)	0.64134	20.7804	-1.13224	0.270217	0.998783	-5.09699
P97450	ATP synthase-coupling factor 6, mitochondrial (ATPase subunit F6) (ATP synthase peripheral stalk subunit F6)	-0.261644	11.9069	0.447366	0.660215	0.998783	-5.29611
P97457	Myosin regulatory light chain 11 (Fast skeletal myosin light chain 2) (MLC2F) (Myosin light chain 11) (Myosin regulatory light chain 2, skeletal muscle isoform)	0.040576	13.0384	-0.0905211	0.928726	0.998783	-5.66714
P97461	40S ribosomal protein S5 [Cleaved into: 40S ribosomal protein S5, N-terminally processed]	0.339411	13.161	-0.750642	0.461145	0.998783	-5.414
P97467	Peptidyl-glycine alpha-amidating monooxygenase (PAM) [Includes: Peptidylglycine alpha-hydroxylating monooxygenase (PHM) (EC 1.14.17.3); Peptidyl-alpha-hydroxyglycine alpha-amidating lyase (EC 4.3.2.5) (Peptidylamidoglycolate lyase) (PAL)]	-0.493122	11.4006	0.677507	0.50713	0.998783	-5.05589
P97742	Carnitine O-palmitoyltransferase 1, liver isoform (CPT1-L) (EC 2.3.1.21) (Carnitine O-palmitoyltransferase I, liver isoform) (CPT I) (CPTI-L) (Carnitine palmitoyltransferase 1A)	-0.328682	13.4762	0.70082	0.49106	0.998783	-5.44655
P97792	Coxsackievirus and adenovirus receptor homolog (CAR) (mCAR)	-0.266119	13.5764	0.570091	0.574627	0.998783	-5.52181
P97805	Protein FAM3D (Oncoprotein-induced protein 1) (Protein EF-7)	0.283788	13.1141	-0.469768	0.64412	0.998783	-5.34685
P97805;Q9D8T0		0.1326	12.3955	-0.214132	0.832971	0.998783	-5.36019
P97807	Fumarate hydratase, mitochondrial (Fumarase) (EC 4.2.1.2) (EF-3)	-0.2846	12.9443	0.497661	0.62539	0.998783	-5.55574
P97816	Protein S100-G (Calbindin-D9k) (S100 calcium-binding protein G) (Vitamin D-dependent calcium-binding protein, intestinal) (CABP)	-0.914085	11.896	1.14822	0.268034	0.998783	-4.74892
P97821	Dipeptidyl peptidase 1 (EC 3.4.14.1) (Cathepsin C) (Cathepsin J) (Dipeptidyl peptidase I) (DPP-I) (DPPI) (Dipeptidyl transferase) [Cleaved into: Dipeptidyl peptidase 1 exclusion domain chain (Dipeptidyl peptidase I exclusion domain chain); Dipeptidyl peptidase 1 heavy chain (Dipeptidyl peptidase I heavy chain); Dipeptidyl peptidase 1 light chain (Dipeptidyl peptidase I light chain)]	0.183479	15.1507	-0.376847	0.710044	0.998783	-5.60546
P97861;Q9ERE2	Keratin, type II cuticular Hb6 (Keratin-86) (K86) (Type II hair keratin Hb6) (Type-II keratin Kb26)	-0.0709007	12.26	0.146327	0.885186	0.998783	-5.66098
P97864	Caspase-7 (CASP-7) (EC 3.4.22.60) (Apoptotic protease Mch-3) (Cysteine protease LICE2) [Cleaved into: Caspase-7 subunit p20; Caspase-7 subunit p11]	-0.0187643	11.7817	0.0379073	0.970154	0.998783	-5.49556
P99026	Proteasome subunit beta type-4 (Low molecular mass protein 3) (Macropain beta chain) (Multicatalytic endopeptidase complex beta chain) (Proteasome beta chain) (Proteasome chain 3)	0.51322	14.0763	-0.971681	0.343251	0.998783	-5.24372
P99027	60S acidic ribosomal protein P2	-99.2743	11.8782	0.517092	0.612107	0.998783	-4.59513
P99028	Cytochrome b-c1 complex subunit 6, mitochondrial (Complex III subunit 6) (Complex III subunit VIII) (Cytochrome c1 non-heme 11 kDa protein) (Mitochondrial hinge protein) (Ubiquinol-cytochrome c reductase complex 11 kDa protein)	-0.190565	13.4258	0.353528	0.727368	0.998783	-5.53179
P99029	Peroxiredoxin-5, mitochondrial (EC 1.11.1.24) (Antioxidant enzyme B166) (AOEB166) (Liver tissue 2D-page spot 2D-0014IV) (PLP) (Peroxiredoxin V) (Prx-V) (Peroxisomal antioxidant enzyme) (Thioredoxin peroxidase PMP20) (Thioredoxin-dependent peroxiredoxin 5)	-0.0481295	12.5256	0.0772465	0.939322	0.998783	-5.37686
Q00519	Xanthine dehydrogenase/oxidase [Includes: Xanthine dehydrogenase (XD) (EC 1.17.1.4); Xanthine oxidase (XO) (EC 1.17.3.2) (Xanthine oxidoreductase) (XOR)]	-0.0288452	14.0819	0.0572117	0.954914	0.998783	-5.66942
Q00519;Q3TYQ9		0.0764675	14.6482	-0.156607	0.877041	0.998783	-5.65959
Q00612	Glucose-6-phosphate 1-dehydrogenase X (G6PD) (EC 1.1.1.49)	0.190852	13.4139	-0.309272	0.76064	0.998783	-5.40012
Q00897	Alpha-1-antitrypsin 1-4 (Alpha-1 protease inhibitor 4) (Serine protease inhibitor 1-4) (Serine protease inhibitor A1d) (Serpin A1d)	0.512678	16.0026	-0.992542	0.332162	0.998783	-5.22655
Q01768	Nucleoside diphosphate kinase B (NDK B) (NDP kinase B) (EC 2.7.4.6) (Histidine protein kinase NDKB) (EC 2.7.13.3) (P18) (nm23-M2)	-0.472686	12.6813	1.08773	0.288964	0.998783	-5.1399
Q01853	Transitional endoplasmic reticulum ATPase (TER ATPase) (EC 3.6.4.6) (15S Mg(2+)-ATPase p97 subunit) (Valosin-containing protein) (VCP)	-0.165366	13.8162	0.340682	0.736706	0.998783	-5.61739
Q02013	Aquaporin-1 (AQP-1) (Aquaporin-CHIP) (Delayed early response protein 2) (DER2) (Water channel protein for red blood cells and kidney proximal tubule)	-0.248304	14.5117	0.493261	0.627165	0.998783	-5.47876
Q02053	Ubiquitin-like modifier-activating enzyme 1 (EC 6.2.1.45) (Ubiquitin-activating enzyme E1) (Ubiquitin-activating enzyme E1 X) (Ubiquitin-like modifier-activating enzyme 1 X)	0.0162245	13.0012	-0.0346211	0.972723	0.998783	-5.58764
Q02248	Catenin beta-1 (Beta-catenin)	-0.0939596	12.2865	0.200591	0.84303	0.998783	-5.56999
Q02248;Q02257		-0.253159	12.6493	0.559949	0.581401	0.998783	-5.52703
Q02257	Junction plakoglobin (Desmoplakin III) (Desmoplakin-3)	-0.115554	12.1695	0.21447	0.832574	0.998783	-5.42139
Q02566;Q91Z83	Myosin-6 (Myosin heavy chain 6) (Myosin heavy chain, cardiac muscle alpha isoform) (MyHC-alpha)	-0.045489	16.6589	0.0890493	0.929881	0.998783	-5.66726
Q02819	Nucleobindin-1 (CALNUC)	0.423188	12.9055	-0.524612	0.606574	0.998783	-5.12332
Q03265	ATP synthase subunit alpha, mitochondrial (ATP synthase F1 subunit alpha)	-0.17537	16.9239	0.238434	0.814743	0.998783	-5.64421
Q03311	Cholinesterase (EC 3.1.1.8) (Acylcholine acylhydrolase) (Butyrylcholine esterase) (Choline esterase II) (Pseudocholinesterase)	-0.636974	13.4579	1.46441	0.157798	0.998783	-4.73117
Q03404	Trefoil factor 2 (Spasmolytic polypeptide) (SP)	0.290505	15.5113	-0.155335	0.881969	0.998783	-5.65841
Q03734	Serine protease inhibitor A3M (Serpin A3M)	0.441886	12.5652	-1.07647	0.29385	0.998783	-5.15051
Q03734;Q6P4P1;Q91WP6		0.546707	11.9761	-0.955698	0.351144	0.998783	-5.01037
Q05117	Tartrate-resistant acid phosphatase type 5 (TR-AP) (EC 3.1.3.2) (Tartrate-resistant acid ATPase) (TrATPase) (Type 5 acid phosphatase)	0.374524	12.3953	-0.865134	0.396679	0.998783	-5.33126
Q05920	Pyruvate carboxylase, mitochondrial (EC 6.4.1.1) (Pyruvic carboxylase) (PCB)	-0.162183	15.9949	0.282036	0.780659	0.998783	-5.6342
Q06138	Calcium-binding protein 39 (MO25alpha) (Protein Mo25)	-0.072305	11.9422	0.138482	0.891437	0.998783	-5.58271
Q06185	ATP synthase subunit e, mitochondrial (ATPase subunit e) (ATP synthase membrane subunit e)	0.462351	12.8652	-0.569275	0.576557	0.998783	-5.10518
Q07076	Annexin A7 (Annexin VII) (Annexin-7) (Synexin)	0.278325	15.2789	-0.57208	0.573303	0.998783	-5.52078
Q07417	Short-chain specific acyl-CoA dehydrogenase, mitochondrial (SCAD) (EC 1.3.8.1) (Butyryl-CoA dehydrogenase)	-0.685118	14.6086	1.39471	0.177591	0.998783	-4.81432
Q07456	Protein AMBP [Cleaved into: Alpha-1-microglobulin (EC 1.6.2.-); Inter-alpha-trypsin inhibitor light chain (ITI-LC) (Bikunin) (HI-30); Trypstatin]	0.96319	13.9832	-2.12941	0.0451366	0.998783	-3.79251
Q07797	Galectin-3-binding protein (Cyp-C-associated protein) (CyCAP) (Lectin galactoside-binding soluble 3-binding protein) (Protein MAMA)	0.25307	15.8449	-0.519749	0.60864	0.998783	-5.54681
Q07813	Apoptosis regulator BAX	-0.71844	12.2201	1.34654	0.193863	0.998783	-4.74092
Q08189	Protein-glutamine gamma-glutamyltransferase E (EC 2.3.2.13) (Transglutaminase E) (TG(E)) (TGE) (TGase E) (Transglutaminase-3) (TGase-3) [Cleaved into: Protein-glutamine gamma-glutamyltransferase E 50 kDa catalytic chain; Protein-glutamine gamma-glutamyltransferase E 27 kDa non-catalytic chain]	0.340875	15.0966	-0.663344	0.514281	0.998783	-5.46964
Q08297	DNA repair protein RAD51 homolog 1 (RAD51 homolog A)	0.334566	14.9828	-0.340526	0.7376	0.998783	-5.08741
Q08509	Epidermal growth factor receptor kinase substrate 8	-0.0184288	13.1925	0.0396495	0.968745	0.998783	-5.6702
Q08652	Retinol-binding protein 2 (Cellular retinol-binding protein II) (CRBP-II)	0.296359	13.2345	-0.447271	0.660281	0.998783	-5.29615
Q08731	Lithostathine-2 (Islet of Langerhans regenerating protein 2) (REG-2) (Pancreatic stone protein 2) (PSP) (Pancreatic thread protein 2) (PTP)	0.693018	16.2614	-0.376336	0.720424	0.998783	-5.59827
Q08857	Platelet glycoprotein 4 (Glycoprotein IIIb) (GPIIIB) (PAS IV) (PAS-4) (Platelet glycoprotein IV) (GPIV) (CD antigen CD36)	0.35572	13.7042	-0.843241	0.408536	0.998783	-5.34793
Q09199	Beta-1,4 N-acetylgalactosaminyltransferase 2 (EC 2.4.1.-)	-0.371341	13.4558	0.691943	0.496875	0.998783	-5.37427
Q0VG18	Small integral membrane protein 24	0.320941	13.8727	-0.664727	0.513414	0.998783	-5.46881
Q10738	Matrilysin (EC 3.4.24.23) (Matrin) (Matrix metalloproteinase-7) (MMP-7) (Pump-1 protease) (Uterine metalloproteinase)	1.1573	13.7241	-1.42777	0.177211	0.998783	-4.58544
Q11011	Puromycin-sensitive aminopeptidase (PSA) (EC 3.4.11.14) (Cytosol alanyl aminopeptidase) (AAP-S)	0.122895	12.3332	-0.28783	0.77628	0.998783	-5.63268
Q11136	Xaa-Pro dipeptidase (X-Pro dipeptidase) (EC 3.4.13.9) (Imidodipeptidase) (Peptidase 4) (Peptidase D) (Proline dipeptidase) (Prolidase)	0.02275	18.0936	-0.0409726	0.967702	0.998783	-5.67015
Q148W0	Phospholipid-transporting ATPase IC (EC 7.6.2.1) (ATPase class I type 8B member 1) (P4-ATPase flippase complex alpha subunit ATP8B1)	-0.388102	12.7055	0.784123	0.442095	0.998783	-5.31451
Q32NZ6	Transmembrane channel-like protein 5	-0.434051	12.5893	0.823832	0.419687	0.998783	-5.28662
Q3L180	Alpha-defensin 26 (Defensin-related cryptdin-26)	0.787719	14.9678	-1.16831	0.261045	0.998783	-4.99311
Q3TC46	Protein PAT1 homolog 1 (PAT1-like protein 1) (Protein PAT1 homolog b) (Pat1b)	0.00374296	14.9373	-0.006309	0.995031	0.998783	-5.58817
Q3TC72	Fumarylacetoacetate hydrolase domain-containing protein 2A (EC 3.-.-.-)	0.418154	12.0579	-0.487784	0.632265	0.998783	-5.04547
Q3TDQ1	Dolichyl-diphosphooligosaccharide--protein glycosyltransferase subunit STT3B (Oligosaccharyl transferase subunit STT3B) (STT3-B) (EC 2.4.99.18) (B6dom1 antigen) (Source of immunodominant MHC-associated peptides)	0.280991	11.0298	-0.341701	0.736986	0.998783	-5.087
Q3THE2	Myosin regulatory light chain 12B (Myosin regulatory light chain 2-B, smooth muscle isoform) (Myosin regulatory light chain 20 kDa) (MLC20) (Myosin regulatory light chain MRLC2)	-0.148066	13.529	0.262067	0.79597	0.998783	-5.55713
Q3THS6	S-adenosylmethionine synthase isoform type-2 (AdoMet synthase 2) (EC 2.5.1.6) (Methionine adenosyltransferase 2) (MAT 2)	0.0987395	14.1569	-0.212951	0.833406	0.998783	-5.64997
Q3TIW9	Ectonucleotide pyrophosphatase/phosphodiesterase family member 7 (E-NPP 7) (NPP-7) (EC 3.1.4.12) (Alkaline sphingomyelin phosphodiesterase) (Intestinal alkaline sphingomyelinase) (Alk-SMase)	0.182626	16.8144	-0.351008	0.729057	0.998783	-5.6141
Q3TIW9;Q8BTJ4		0.477218	12.6213	-1.13311	0.269858	0.998783	-5.09613
Q3TMQ6	Angiogenin-4 (EC 3.1.27.-)	0.494501	16.7318	-0.789106	0.439894	0.998783	-5.3864
Q3TTY0	Phospholipase B1, membrane-associated (Phospholipase B) (Lysophospholipase) (EC 3.1.1.5) (Phospholipase A2) (EC 3.1.1.4) (Phospholipase B/lipase) (PLB/LIP) (Triacylglycerol lipase) (EC 3.1.1.3)	0.418534	16.6902	-0.815742	0.423746	0.998783	-5.36829
Q3TTY5	Keratin, type II cytoskeletal 2 epidermal (Cytokeratin-2e) (CK-2e) (Epithelial keratin-2e) (Keratin-2 epidermis) (Keratin-2e) (K2e) (Type-II keratin Kb2)	-0.346291	16.8973	0.4851	0.634242	0.998783	-5.5613
Q3TWN3;Q69ZF7	Metal transporter CNNM2 (Ancient conserved domain-containing protein 2) (mACDP2) (Cyclin-M2)	-0.401395	11.6777	0.78578	0.441619	0.998783	-5.22345
Q3TWW8	Serine/arginine-rich splicing factor 6 (Pre-mRNA-splicing factor SRP55) (Splicing factor, arginine/serine-rich 6)	-0.88566	12.1713	1.02624	0.31992	0.998783	-4.77641
Q3TYQ9	Aldehyde oxidase 4 (EC 1.2.3.1) (Aldehyde oxidase homolog 2) (Azaheterocycle hydroxylase 4) (EC 1.17.3.-) (Retinal oxidase)	-0.00828575	13.2543	0.0167	0.986833	0.998783	-5.6708
Q3U0B3	Dehydrogenase/reductase SDR family member 11 (17-beta-hydroxysteroid dehydrogenase) (3-beta-hydroxysteroid 3-dehydrogenase) (EC 1.1.1.270) (Estradiol 17-beta-dehydrogenase) (EC 1.1.1.62) (Short-chain dehydrogenase/reductase family 24C member 1)	-0.166235	13.7723	0.373748	0.712315	0.998783	-5.60653
Q3U1J4	DNA damage-binding protein 1 (DDB p127 subunit) (Damage-specific DNA-binding protein 1) (UV-damaged DNA-binding factor)	0.299353	13.1461	-0.493419	0.627639	0.998783	-5.33752
Q3U9G9	Delta(14)-sterol reductase LBR (Delta-14-SR) (EC 1.3.1.70) (3-beta-hydroxysterol Delta (14)-reductase) (C-14 sterol reductase) (C14SR) (Integral nuclear envelope inner membrane protein) (Lamin-B receptor) (Sterol C14-reductase)	-0.752736	11.9801	0.883001	0.390203	0.998783	-4.86575
Q3ULJ0	Glycerol-3-phosphate dehydrogenase 1-like protein (EC 1.1.1.8)	-0.210235	11.9347	0.391451	0.700025	0.998783	-5.37553
Q3UM45	Protein phosphatase 1 regulatory subunit 7 (Protein phosphatase 1 regulatory subunit 22)	-0.198345	11.6377	0.397619	0.695312	0.998783	-5.42003
Q3UMC0;Q9D3R6	Ribosome biogenesis protein SPATA5 (EC 3.6.4.10) (Spermatogenesis-associated factor protein) (Spermatogenesis-associated protein 5)	-0.210634	12.4623	0.327418	0.747101	0.998783	-5.33475
Q3UMR5	Calcium uniporter protein, mitochondrial	-0.497321	13.7939	0.521889	0.608838	0.998783	-5.03374
Q3UNX5	Acyl-coenzyme A synthetase ACSM3, mitochondrial (EC 6.2.1.2) (Acyl-CoA synthetase medium-chain family member 3) (Butyrate--CoA ligase 3) (Butyryl-coenzyme A synthetase 3) (Middle-chain acyl-CoA synthetase 3) (Propionate--CoA ligase) (EC 6.2.1.17) (Protein SA homolog)	-0.570732	12.5548	1.13851	0.268961	0.998783	-4.98753
Q3UQ44	Ras GTPase-activating-like protein IQGAP2	-0.105496	12.7852	0.177797	0.860853	0.998783	-5.42757
Q3UQ44;Q9JKF1		-0.909423	12.9943	0.960148	0.351149	0.998783	-4.81856
Q3UV17	Keratin, type II cytoskeletal 2 oral (Keratin-76) (K76) (Type-II keratin Kb9)	-0.0712625	17.5528	0.0970386	0.92394	0.998783	-5.6665
Q3UVK0	Endoplasmic reticulum metallopeptidase 1 (EC 3.4.-.-) (Felix-ina)	-0.730527	14.6548	1.46427	0.157837	0.998783	-4.73134
Q3UVU3	Zinc transporter 10 (ZnT-10) (Solute carrier family 30 member 10)	0.64104	10.0825	-0.78212	0.445471	0.998783	-4.91991
Q3UWA6	Guanylyl cyclase C (GC-C) (EC 4.6.1.2) (Heat-stable enterotoxin receptor) (STA receptor) (Intestinal guanylate cyclase)	0.0678742	15.2755	-0.137866	0.891652	0.998783	-5.66214
Q3UZZ4	Olfactomedin-4 (OLM4)	0.335924	13.2238	-0.558731	0.58318	0.998783	-5.30814
Q3V0K9	Plastin-1	-0.287844	14.5706	0.646514	0.524906	0.998783	-5.47961
Q3V0K9;Q99K51		0.331078	12.8322	-0.602104	0.554042	0.998783	-5.42549
Q45VN2	Alpha-defensin 20 (Cryptdin-4) (Defensin-related cryptdin-20)	0.305986	21.2348	-0.520117	0.608388	0.998783	-5.54663
Q497I4	Keratin, type I cuticular Ha5 (Hair keratin, type I Ha5) (Keratin-35) (K35)	0.556471	12.0955	-1.13913	0.268711	0.998783	-4.98651
Q504N0	Carboxypeptidase A2 (EC 3.4.17.15)	-0.423285	17.0018	0.617701	0.545341	0.998783	-5.49427
Q504N7	Pyrin and HIN domain-containing protein 1-like	-0.439298	13.9608	0.52206	0.608312	0.998783	-5.1018
Q571E4	N-acetylgalactosamine-6-sulfatase (EC 3.1.6.4) (Chondroitinsulfatase) (Chondroitinase) (Galactose-6-sulfate sulfatase) (N-acetylgalactosamine-6-sulfate sulfatase) (GalNAc6S sulfatase)	0.376644	14.5343	-0.824844	0.418673	0.998783	-5.36162
Q571I9	Aldehyde dehydrogenase family 16 member A1	0.253077	10.9789	-0.308163	0.761901	0.998783	-5.09452
Q5BKQ4	Inactive pancreatic lipase-related protein 1 (PL-RP1)	0.296043	15.8407	-0.594831	0.558272	0.998783	-5.50871
Q5FW60	Major urinary protein 20 (Darcin) (Major urinary protein 24)	-1.04267	14.3452	1.7353	0.0987648	0.998783	-4.28646
Q5FWK3	Rho GTPase-activating protein 1 (Rho-type GTPase-activating protein 1)	-0.850773	11.1486	1.35521	0.197858	0.998783	-4.65731
Q5SSH7	Zinc finger ZZ-type and EF-hand domain-containing protein 1	0.66435	14.5923	-1.32482	0.199378	0.998783	-4.89438
Q5SX40	Myosin-1 (Myosin heavy chain 1) (Myosin heavy chain 2x) (MyHC-2x) (Myosin heavy chain, skeletal muscle, adult 1)	-0.56041	14.8792	1.12211	0.275019	0.998783	-5.04226
Q5SYD0	Unconventional myosin-Id	0.100156	13.6723	-0.196143	0.846372	0.998783	-5.65315
Q5XJY5	Coatomer subunit delta (Archain) (Delta-coat protein) (Delta-COP)	0.381518	13.3141	-0.755383	0.458356	0.998783	-5.41079
Q60597	2-oxoglutarate dehydrogenase complex component E1 (E1o) (OGDC-E1) (OGDH-E1) (EC 1.2.4.2) (2-oxoglutarate dehydrogenase, mitochondrial) (Alpha-ketoglutarate dehydrogenase) (Alpha-KGDH-E1) (Thiamine diphosphate (ThDP)-dependent 2-oxoglutarate dehydrogenase)	-0.236009	13.7842	0.528446	0.602695	0.998783	-5.54265
Q60604	Scinderin (Adseverin) (Gelsolin-like protein)	0.397877	13.6646	-0.656078	0.52098	0.998783	-5.39397
Q60605	Myosin light polypeptide 6 (17 kDa myosin light chain) (LC17) (Myosin light chain 3) (MLC-3) (Myosin light chain alkali 3) (Myosin light chain A3) (Smooth muscle and nonmuscle myosin light chain alkali 6)	-0.165562	13.5582	0.338028	0.738677	0.998783	-5.61821
Q60648	Ganglioside GM2 activator (Cerebroside sulfate activator protein) (GM2-AP) (Sphingolipid activator protein 3) (SAP-3)	1.17469	13.5907	-1.25988	0.224603	0.998783	-4.60962
Q60692	Proteasome subunit beta type-6 (EC 3.4.25.1) (Low molecular mass protein 19) (Macropain delta chain) (Multicatalytic endopeptidase complex delta chain) (Proteasome delta chain) (Proteasome subunit Y)	-0.0978082	14.9304	0.193693	0.848266	0.998783	-5.65359
Q60700	Mitogen-activated protein kinase kinase kinase 12 (EC 2.7.11.25) (Dual leucine zipper bearing kinase) (DLK) (Leucine-zipper protein kinase) (ZPK) (MAPK-upstream kinase) (MUK) (Mixed lineage kinase)	0.85516	13.1256	-0.89258	0.385201	0.998783	-4.85916
Q60710	Deoxynucleoside triphosphate triphosphohydrolase SAMHD1 (dNTPase) (EC 3.1.5.-) (Interferon-gamma-inducible protein Mg11) (SAM domain and HD domain-containing protein 1) (mSAMHD1)	-0.61771	11.799	1.26627	0.220617	0.998783	-4.86113
Q60737	Casein kinase II subunit alpha (CK II alpha) (EC 2.7.11.1)	-0.268851	11.4657	0.525991	0.604938	0.998783	-5.37566
Q60767	Lymphocyte antigen 75 (Ly-75) (DEC-205) (CD antigen CD205)	-0.139247	10.8918	0.169792	0.867284	0.998783	-5.11741
Q60854	Serpin B6 (Placental thrombin inhibitor) (Proteinase inhibitor 6) (PI-6)	-0.491736	19.1509	0.770282	0.450106	0.998783	-5.40015
Q60866	Phosphotriesterase-related protein (EC 3.1.-.-) (Parathion hydrolase-related protein)	0.124707	11.9915	-0.233646	0.817877	0.998783	-5.41337
Q60928	Glutathione hydrolase 1 proenzyme (EC 3.4.19.13) (Gamma-glutamyltransferase 1) (Gamma-glutamyltranspeptidase 1) (GGT 1) (EC 2.3.2.2) (Leukotriene-C4 hydrolase) (EC 3.4.19.14) (CD antigen CD224) [Cleaved into: Glutathione hydrolase 1 heavy chain; Glutathione hydrolase 1 light chain]	0.260274	14.2343	-0.559529	0.581683	0.998783	-5.52724
Q60930	Voltage-dependent anion-selective channel protein 2 (VDAC-2) (mVDAC2) (Outer mitochondrial membrane protein porin 2) (Voltage-dependent anion-selective channel protein 6) (VDAC-6) (mVDAC6)	0.200047	17.0691	-0.355693	0.725596	0.998783	-5.61258
Q60931	Voltage-dependent anion-selective channel protein 3 (VDAC-3) (mVDAC3) (Outer mitochondrial membrane protein porin 3)	-0.110062	14.773	0.224464	0.824552	0.998783	-5.64765
Q60932	Voltage-dependent anion-selective channel protein 1 (VDAC-1) (mVDAC1) (Outer mitochondrial membrane protein porin 1) (Plasmalemmal porin) (Voltage-dependent anion-selective channel protein 5) (VDAC-5) (mVDAC5)	-0.096268	15.6557	0.171594	0.865389	0.998783	-5.65732
Q60967	Bifunctional 3'-phosphoadenosine 5'-phosphosulfate synthase 1 (PAPS synthase 1) (PAPSS 1) (Sulfurylase kinase 1) (SK 1) (SK1) [Includes: Sulfate adenylyltransferase (EC 2.7.7.4) (ATP-sulfurylase) (Sulfate adenylate transferase) (SAT); Adenylyl-sulfate kinase (EC 2.7.1.25) (3'-phosphoadenosine-5'-phosphosulfate synthase) (APS kinase) (Adenosine-5'-phosphosulfate 3'-phosphotransferase) (Adenylylsul…	0.792959	11.6469	-1.12018	0.278091	0.998783	-4.77172
Q60994	Adiponectin (30 kDa adipocyte complement-related protein) (Adipocyte complement-related 30 kDa protein) (ACRP30) (Adipocyte, C1q and collagen domain-containing protein) (Adipocyte-specific protein AdipoQ)	0.52159	12.0887	-1.05228	0.30578	0.998783	-5.02017
Q60997	Deleted in malignant brain tumors 1 protein (Apactin) (CRP-ductin) (Glycoprotein 300) (gp300) (Hensin) (Mucin-like glycoprotein) (Muclin) (Vomeroglandin) (p80)	0.639394	21.449	-1.07616	0.293986	0.998783	-5.15081
Q61009	Scavenger receptor class B member 1 (SRB1) (SR-BI)	0.874197	13.9511	-1.99093	0.0595735	0.998783	-4.00733
Q61035;Q99KK9	Histidine--tRNA ligase, cytoplasmic (EC 6.1.1.21) (Histidyl-tRNA synthetase) (HisRS)	0.0205548	12.65	-0.0396618	0.968753	0.998783	-5.58747
Q61171	Peroxiredoxin-2 (EC 1.11.1.24) (Thiol-specific antioxidant protein) (TSA) (Thioredoxin peroxidase 1) (Thioredoxin-dependent peroxide reductase 1) (Thioredoxin-dependent peroxiredoxin 2)	0.00727512	13.4595	-0.0140911	0.988896	0.998783	-5.58809
Q61194	Phosphatidylinositol 4-phosphate 3-kinase C2 domain-containing subunit alpha (PI3K-C2-alpha) (PtdIns-3-kinase C2 subunit alpha) (EC 2.7.1.137) (EC 2.7.1.153) (EC 2.7.1.154) (Cpk-m) (Phosphoinositide 3-kinase-C2-alpha) (p170)	-0.95827	14.2693	1.00009	0.332032	0.998783	-4.79244
Q61205	Platelet-activating factor acetylhydrolase IB subunit alpha1 (EC 3.1.1.47) (PAF acetylhydrolase 29 kDa subunit) (PAF-AH 29 kDa subunit) (PAF-AH subunit gamma) (PAFAH subunit gamma)	-0.0670965	11.9116	0.0788924	0.938088	0.998783	-5.1267
Q61247	Alpha-2-antiplasmin (Alpha-2-AP) (Alpha-2-plasmin inhibitor) (Alpha-2-PI) (Serpin F2)	0.312123	11.5796	-0.595384	0.558563	0.998783	-5.34216
Q61316	Heat shock 70 kDa protein 4 (Heat shock 70-related protein APG-2)	0.469464	11.9684	-0.550928	0.589231	0.998783	-5.02444
Q61391	Neprilysin (EC 3.4.24.11) (Atriopeptidase) (Enkephalinase) (Neutral endopeptidase 24.11) (NEP) (Neutral endopeptidase) (Skin fibroblast elastase) (SFE) (CD antigen CD10)	0.307961	18.0248	-0.578156	0.569269	0.998783	-5.5176
Q61398	Procollagen C-endopeptidase enhancer 1 (P14) (Procollagen COOH-terminal proteinase enhancer 1) (PCPE-1) (Procollagen C-proteinase enhancer 1) (Type 1 procollagen C-proteinase enhancer protein) (Type I procollagen COOH-terminal proteinase enhancer)	0.547483	10.8273	-0.807788	0.430285	0.998783	-4.99389
Q61425	Hydroxyacyl-coenzyme A dehydrogenase, mitochondrial (HCDH) (EC 1.1.1.35) (Medium and short-chain L-3-hydroxyacyl-coenzyme A dehydrogenase) (Short-chain 3-hydroxyacyl-CoA dehydrogenase)	-0.154285	15.2032	0.312543	0.757691	0.998783	-5.62584
Q61496;Q62167	ATP-dependent RNA helicase DDX4 (EC 3.6.4.13) (DEAD box protein 4) (Mvh) (Vasa homolog)	-0.117301	12.2211	0.211943	0.834515	0.998783	-5.42185
Q61503	5'-nucleotidase (5'-NT) (EC 3.1.3.35) (EC 3.1.3.5) (EC 3.1.3.89) (EC 3.1.3.91) (EC 3.1.3.99) (5'-deoxynucleotidase) (Ecto-5'-nucleotidase) (IMP-specific 5'-nucleotidase) (Thymidylate 5'-phosphatase) (CD antigen CD73)	-0.008712	15.6052	0.0178318	0.98594	0.998783	-5.67078
Q61543	Golgi apparatus protein 1 (E-selectin ligand 1) (ESL-1) (Selel) (Golgi sialoglycoprotein MG-160)	0.0889744	11.091	-0.118328	0.907422	0.998783	-5.22135
Q61598	Rab GDP dissociation inhibitor beta (Rab GDI beta) (GDI-3) (Guanosine diphosphate dissociation inhibitor 2) (GDI-2)	0.0994145	12.455	-0.178424	0.860651	0.998783	-5.65599
Q61646	Haptoglobin [Cleaved into: Haptoglobin alpha chain; Haptoglobin beta chain]	0.483256	13.0361	-1.10051	0.283488	0.998783	-5.12774
Q61739	Integrin alpha-6 (CD49 antigen-like family member F) (VLA-6) (CD antigen CD49f) [Cleaved into: Integrin alpha-6 heavy chain; Integrin alpha-6 light chain; Processed integrin alpha-6 (Alpha6p)]	-0.560898	13.564	1.25125	0.224515	0.998783	-4.97496
Q61762	Potassium voltage-gated channel subfamily A member 5 (Voltage-gated potassium channel subunit Kv1.5) (KV1-5)	-1.27696	12.5919	1.23944	0.239172	0.998783	-4.625
Q61765;Q61897	Keratin, type I cuticular Ha1 (HKA-1) (Hair keratin, type I Ha1) (Keratin-31) (K31)	-0.158819	14.2523	0.236672	0.815564	0.998783	-5.35602
Q61781;Q6IFX2;Q9Z2K1		-0.109631	13.0981	0.125853	0.901302	0.998783	-5.22098
Q61781;Q9QWL7		0.641012	12.7754	-1.00842	0.329911	0.998783	-5.20847
Q61792	LIM and SH3 domain protein 1 (LASP-1) (Metastatic lymph node gene 50 protein) (MLN 50)	0.214073	12.5898	-0.344005	0.735028	0.998783	-5.32999
Q61838	Pregnancy zone protein (Alpha-2-macroglobulin) (Alpha-2-M) [Cleaved into: Alpha-2-macroglobulin 165 kDa subunit; Alpha-2-macroglobulin 35 kDa subunit]	0.806658	13.8151	-1.57214	0.131027	0.998783	-4.59668
Q61847	Meprin A subunit beta (EC 3.4.24.63) (Endopeptidase-2) (Meprin B)	0.434403	18.6922	-0.844237	0.407992	0.998783	-5.34718
Q61879;Q6URW6		0.407732	11.5085	-0.561258	0.581888	0.998783	-5.10854
Q61900	Submaxillary gland androgen-regulated protein 3A (Salivary protein MSG1) (Submaxillary gland androgen-regulated protein 1)	0.273052	13.4767	-0.556909	0.58344	0.998783	-5.52857
Q61937	Nucleophosmin (NPM) (Nucleolar phosphoprotein B23) (Nucleolar protein NO38) (Numatrin)	-0.168919	12.0438	0.315224	0.75619	0.998783	-5.4024
Q61941	NAD(P) transhydrogenase, mitochondrial (EC 7.1.1.1) (Nicotinamide nucleotide transhydrogenase) (Pyridine nucleotide transhydrogenase)	0.033883	14.0248	-0.0356354	0.97201	0.998783	-5.12698
Q62087	Serum paraoxonase/lactonase 3 (EC 3.1.1.2) (EC 3.1.1.81) (EC 3.1.8.1)	-0.526542	12.6573	1.15092	0.262622	0.998783	-5.07853
Q62093	Serine/arginine-rich splicing factor 2 (Protein PR264) (Putative myelin regulatory factor 1) (MRF-1) (Splicing component, 35 kDa) (Splicing factor SC35) (SC-35) (Splicing factor, arginine/serine-rich 2)	1.51506	11.521	-1.81225	0.0885987	0.998783	-4.12115
Q62159	Rho-related GTP-binding protein RhoC (Silica-induced gene 61 protein) (SIG-61)	0.347519	11.3399	-0.522801	0.610714	0.998783	-5.26368
Q62159;Q9QUI0		0.132338	15.4108	-0.269852	0.789892	0.998783	-5.6373
Q62186	Translocon-associated protein subunit delta (TRAP-delta) (Signal sequence receptor subunit delta) (SSR-delta)	0.0447704	12.2153	-0.0825785	0.935091	0.998783	-5.43822
Q62261	Spectrin beta chain, non-erythrocytic 1 (Beta-II spectrin) (Embryonic liver fodrin) (Fodrin beta chain)	-0.100048	13.1181	0.165698	0.870228	0.998783	-5.42935
Q62273	Sulfate transporter (Diastrophic dysplasia protein homolog) (ST-OB) (Solute carrier family 26 member 2)	-0.094181	11.4641	0.206276	0.838754	0.998783	-5.52709
Q62283	Tetraspanin-7 (Tspan-7) (Cell surface glycoprotein A15) (PE31) (TALLA homolog) (Transmembrane 4 superfamily member 2) (CD antigen CD231)	-0.0908131	9.93588	0.177047	0.861332	0.998783	-5.47524
Q62395	Trefoil factor 3 (Intestinal trefoil factor) (mITF)	0.678072	15.7692	-1.25008	0.224936	0.998783	-4.97621
Q62425	Cytochrome c oxidase subunit NDUFA4	-0.222744	11.412	0.468786	0.644519	0.998783	-5.44839
Q62465	Synaptic vesicle membrane protein VAT-1 homolog (EC 1.-.-.-)	0.233866	11.8453	-0.373088	0.714213	0.998783	-5.32098
Q62468	Villin-1	0.1073	15.6488	-0.160138	0.874796	0.998783	-5.6589
Q62469	Integrin alpha-2 (CD49 antigen-like family member B) (Collagen receptor) (Platelet membrane glycoprotein Ia) (GPIa) (VLA-2 subunit alpha) (CD antigen CD49b)	0.326847	12.0495	-0.817694	0.422655	0.998783	-5.36687
Q62470	Integrin alpha-3 (CD49 antigen-like family member C) (Galactoprotein B3) (GAPB3) (VLA-3 subunit alpha) (CD antigen CD49c) [Cleaved into: Integrin alpha-3 heavy chain; Integrin alpha-3 light chain]	0.409831	13.6627	-0.926699	0.364545	0.998783	-5.2823
Q62471	Vomeronasal secretory protein 1 (Lipocalin-3) (Vomeronasal secretory protein I) (VNSP I)	-1.06135	15.7875	1.7698	0.0924136	0.998783	-4.33385
Q63739	Protein tyrosine phosphatase type IVA 1 (EC 3.1.3.48) (Protein-tyrosine phosphatase 4a1) (Protein-tyrosine phosphatase of regenerating liver 1) (PRL-1)	0.0600172	11.5332	-0.104202	0.918219	0.998783	-5.37482
Q63844	Mitogen-activated protein kinase 3 (MAP kinase 3) (MAPK 3) (EC 2.7.11.24) (ERT2) (Extracellular signal-regulated kinase 1) (ERK-1) (Insulin-stimulated MAP2 kinase) (MAP kinase isoform p44) (p44-MAPK) (MNK1) (Microtubule-associated protein 2 kinase) (p44-ERK1)	-0.220238	13.0674	0.420751	0.678625	0.998783	-5.46729
Q63886;Q64435;Q6ZQM8		-0.978141	16.0388	1.66304	0.111064	0.998783	-4.47703
Q64133	Amine oxidase [flavin-containing] A (EC 1.4.3.21) (EC 1.4.3.4) (Monoamine oxidase type A) (MAO-A)	-0.613036	15.3574	0.84573	0.411696	0.998783	-5.34187
Q64191	N(4)-(beta-N-acetylglucosaminyl)-L-asparaginase (EC 3.5.1.26) (Aspartylglucosaminidase) (AGA) (Glycosylasparaginase) (N4-(N-acetyl-beta-glucosaminyl)-L-asparagine amidase) [Cleaved into: Glycosylasparaginase alpha chain; Glycosylasparaginase beta chain]	-0.00415325	13.8387	0.00974399	0.992317	0.998783	-5.67089
Q64277	ADP-ribosyl cyclase/cyclic ADP-ribose hydrolase 2 (EC 3.2.2.6) (ADP-ribosyl cyclase 2) (Antigen BP3) (BP-3 alloantigen) (Bone marrow stromal antigen 1) (BST-1) (Cyclic ADP-ribose hydrolase 2) (cADPr hydrolase 2) (Leukocyte antigen 65) (Ly-65) (CD antigen CD157)	0.505756	14.7652	-1.00154	0.327897	0.998783	-5.21867
Q64299	CCN family member 3 (Cellular communication network factor 3) (Nephroblastoma-overexpressed gene protein homolog) (Protein NOV homolog) (NovH)	0.864123	13.6568	-1.5823	0.129162	0.998783	-4.52847
Q64324	Syntaxin-binding protein 2 (MUSEC1) (Protein unc-18 homolog 2) (Munc18-2) (Unc18-2) (Protein unc-18 homolog B) (Unc-18B)	-0.44048	12.2293	0.508143	0.61823	0.998783	-5.03856
Q64331	Unconventional myosin-VI (Protein twist) (Unconventional myosin-6)	0.117025	12.221	-0.207962	0.837576	0.998783	-5.42257
Q64374	Regucalcin (RC) (Gluconolactonase) (GNL) (EC 3.1.1.17) (Senescence marker protein 30) (SMP-30)	0.731093	13.6384	-1.6907	0.10559	0.998783	-4.43973
Q64433	10 kDa heat shock protein, mitochondrial (Hsp10) (10 kDa chaperonin) (Chaperonin 10) (CPN10)	0.28133	13.7738	-0.55033	0.587893	0.998783	-5.53186
Q64435	UDP-glucuronosyltransferase 1-6 (UDPGT 1-6) (UGT1*6) (UGT1-06) (UGT1.6) (EC 2.4.1.17) (Phenol UDP-glucuronosyltransferase) (UDP-glucuronosyltransferase 1A6) (UGT1A6) (UGP1A1) (UGT1A7)	-0.66443	11.7508	1.11493	0.281084	0.998783	-4.92317
Q64436;Q8VDN2		-0.163485	12.971	0.103497	0.921152	0.998783	-5.66536
Q64436;Q8VDN2;Q9Z1W8		0.129892	13.2562	-0.203436	0.84106	0.998783	-5.42337
Q64442	Sorbitol dehydrogenase (SDH) (SORD) (EC 1.1.1.-) (L-iditol 2-dehydrogenase) (EC 1.1.1.14) (Polyol dehydrogenase) (Xylitol dehydrogenase) (XDH) (EC 1.1.1.9)	0.62792	13.6674	-1.27496	0.216161	0.998783	-4.94941
Q64444	Carbonic anhydrase 4 (EC 4.2.1.1) (Carbonate dehydratase IV) (Carbonic anhydrase IV) (CA-IV)	-0.365081	15.3189	0.730888	0.472873	0.998783	-5.42716
Q64455	Receptor-type tyrosine-protein phosphatase eta (Protein-tyrosine phosphatase eta) (R-PTP-eta) (EC 3.1.3.48) (HPTP beta-like tyrosine phosphatase) (Protein-tyrosine phosphatase receptor type J) (R-PTP-J) (Susceptibility to colon cancer 1) (CD antigen CD148)	0.176718	12.3604	-0.412651	0.684019	0.998783	-5.59249
Q64467	Glyceraldehyde-3-phosphate dehydrogenase, testis-specific (EC 1.2.1.12) (Spermatogenic cell-specific glyceraldehyde 3-phosphate dehydrogenase 2) (GAPDH-2) (Spermatogenic glyceraldehyde-3-phosphate dehydrogenase)	-0.32535	16.5304	0.615619	0.544719	0.998783	-5.49729
Q64514	Tripeptidyl-peptidase 2 (TPP-2) (EC 3.4.14.10) (Tripeptidyl aminopeptidase) (Tripeptidyl-peptidase II) (TPP-II)	-0.756095	12.3887	0.858059	0.403426	0.998783	-4.87997
Q64516	Glycerol kinase (GK) (Glycerokinase) (EC 2.7.1.30) (ATP:glycerol 3-phosphotransferase)	0.119903	13.4636	-0.237912	0.814354	0.998783	-5.5626
Q64518	Sarcoplasmic/endoplasmic reticulum calcium ATPase 3 (SERCA3) (SR Ca(2+)-ATPase 3) (EC 7.2.2.10) (Calcium pump 3)	0.121115	12.3694	-0.174961	0.863838	0.998783	-5.42772
Q64521	Glycerol-3-phosphate dehydrogenase, mitochondrial (GPD-M) (GPDH-M) (EC 1.1.5.3) (Protein TISP38)	-0.218297	15.5241	0.408256	0.687192	0.998783	-5.59414
Q64522;Q8CGP5	Histone H2A type 2-B (H2A-clustered histone 21) (H2a-613A)	0.452365	18.2204	-0.857511	0.400782	0.998783	-5.33711
Q64523;Q6GSS7	Histone H2A type 2-C (H2A-clustered histone 20) (H2a-613B)	0.757438	11.3291	-1.42107	0.171389	0.998783	-4.65514
Q64524	Histone H2B type 2-E (H2B-clustered histone 21) (H2b 613)	-0.269993	13.4287	0.546664	0.590335	0.998783	-5.53372
Q64669	NAD(P)H dehydrogenase [quinone] 1 (EC 1.6.5.2) (Azoreductase) (DT-diaphorase) (DTD) (Menadione reductase) (NAD(P)H:quinone oxidoreductase 1) (Phylloquinone reductase) (Quinone reductase 1) (QR1)	0.213326	12.0883	-0.362023	0.721761	0.998783	-5.32471
Q64704	Syntaxin-3	-0.104616	12.5049	0.163145	0.872313	0.998783	-5.36823
Q64727	Vinculin (Metavinculin)	-0.488081	11.9216	0.927118	0.366107	0.998783	-5.17045
Q64735	Complement component receptor 1-like protein (Complement regulatory protein Crry) (Protein p65)	0.359171	13.2781	-0.371829	0.714858	0.998783	-5.0796
Q68FD5	Clathrin heavy chain 1	-0.0540382	12.8788	0.111358	0.912435	0.998783	-5.58257
Q68FL4	Putative adenosylhomocysteinase 3 (AdoHcyase 3) (EC 3.13.2.1) (Long-IRBIT) (S-adenosyl-L-homocysteine hydrolase 3) (S-adenosylhomocysteine hydrolase-like protein 2)	-0.799475	12.6462	1.8504	0.0782858	0.998783	-4.21575
Q68FL4;Q80SW1		-0.262375	14.0995	0.595923	0.557556	0.998783	-5.50812
Q69ZF7	Metal transporter CNNM4 (Ancient conserved domain-containing protein 4) (mACDP4) (Cyclin-M4)	-0.308436	13.1441	0.582162	0.567254	0.998783	-5.39594
Q6DYE8	Ectonucleotide pyrophosphatase/phosphodiesterase family member 3 (E-NPP 3) (Phosphodiesterase I beta) (PD-Ibeta) (Phosphodiesterase I/nucleotide pyrophosphatase 3) (CD antigen CD203c) [Includes: Alkaline phosphodiesterase I (EC 3.1.4.1); Nucleotide pyrophosphatase (NPPase) (EC 3.6.1.9) (Nucleotide diphosphatase)]	0.687094	18.0827	-1.35848	0.188636	0.998783	-4.85624
Q6GQT9	BOS complex subunit NOMO1 (Nodal modulator 1)	-0.239232	11.6019	0.456998	0.653099	0.998783	-5.35187
Q6IFX2	Keratin, type I cytoskeletal 42 (Cytokeratin-42) (CK-42) (Keratin-17n) (Keratin-42) (K42) (Type I keratin Ka22)	0.359264	13.2118	-0.450636	0.660773	0.998783	-5.57423
Q6NSR8	Probable aminopeptidase NPEPL1 (EC 3.4.11.-) (Aminopeptidase-like 1)	0.445076	14.4412	-0.985942	0.335315	0.998783	-5.23229
Q6NXH9	Keratin, type II cytoskeletal 73 (Cytokeratin-73) (CK-73) (Keratin-73) (K73) (Type II inner root sheath-specific keratin-K6irs3) (Type-II keratin Kb36)	-0.318297	13.697	0.34399	0.735039	0.998783	-5.08869
Q6P069	Sorcin	-0.362749	13.8855	0.588529	0.564615	0.998783	-5.39129
Q6P1B1	Xaa-Pro aminopeptidase 1 (EC 3.4.11.9) (Aminoacylproline aminopeptidase) (Cytosolic aminopeptidase P) (Soluble aminopeptidase P) (sAmp) (X-Pro aminopeptidase 1) (X-prolyl aminopeptidase 1, soluble)	-0.071968	12.688	0.167118	0.868866	0.998783	-5.65802
Q6P5E4	UDP-glucose:glycoprotein glucosyltransferase 1 (UGT1) (EC 2.4.1.-) (UDP--Glc:glycoprotein glucosyltransferase) (UDP-glucose ceramide glucosyltransferase-like 1)	-0.767799	11.7557	1.46604	0.159761	0.998783	-4.57612
Q6P8K8	Carboxypeptidase A4 (EC 3.4.17.-)	-0.0216452	12.2145	0.0292385	0.977012	0.998783	-5.21358
Q6P8U6	Pancreatic triacylglycerol lipase (PL) (PTL) (Pancreatic lipase) (EC 3.1.1.3)	-0.658664	20.0861	1.05973	0.30123	0.998783	-5.16612
Q6PB66	Leucine-rich PPR motif-containing protein, mitochondrial (130 kDa leucine-rich protein) (LRP 130) (mLRP130)	-0.320085	11.2869	0.665001	0.513986	0.998783	-5.35076
Q6PDN3	Myosin light chain kinase, smooth muscle (MLCK) (smMLCK) (EC 2.7.11.18) (Kinase-related protein) (KRP) (Telokin) [Cleaved into: Myosin light chain kinase, smooth muscle, deglutamylated form]	0.393142	13.6167	-0.778929	0.44508	0.998783	-5.32083
Q6PHN1	Coiled-coil domain-containing protein 57	0.49978	11.6929	-0.591727	0.562233	0.998783	-5.00737
Q6PHN9	Ras-related protein Rab-35	0.316501	14.2479	-0.351024	0.733308	0.998783	-5.43264
Q6PHZ2	Calcium/calmodulin-dependent protein kinase type II subunit delta (CaM kinase II subunit delta) (CaMK-II subunit delta) (EC 2.7.11.17)	-0.618208	13.0113	1.18344	0.25042	0.998783	-4.97797
Q6PZE0	Mucin-19 (MUC-19) (Gel-forming secreted mucin-19) (Sublingual apomucin)	-0.627943	15.0933	1.24684	0.226098	0.998783	-4.97967
Q6Q473	Calcium-activated chloride channel regulator 4A (EC 3.4.-.-) (Calcium-activated chloride channel regulator 6) (mClca6) [Cleaved into: Calcium-activated chloride channel regulator 4A, 110 kDa form; Calcium-activated chloride channel regulator 4A, 30 kDa form]	0.519559	19.263	-0.961319	0.347262	0.998783	-5.25342
Q6T3U4	NPC1-like intracellular cholesterol transporter 1 (Niemann-Pick C1-like protein 1) (Npc1l1)	0.550616	15.6339	-1.1145	0.27758	0.998783	-5.11428
Q6UGQ3	Secretoglobin family 2B member 2 (Androgen-binding protein epsilon) (Lacrimal androgen-binding protein epsilon)	-0.186623	12.4344	0.421727	0.677693	0.998783	-5.51101
Q6URW6	Myosin-14 (Myosin heavy chain 14) (Myosin heavy chain, non-muscle IIc) (Non-muscle myosin heavy chain IIc) (NMHC II-C)	0.178344	13.2951	-0.275372	0.786144	0.998783	-5.4086
Q6X893	Choline transporter-like protein 1 (Solute carrier family 44 member 1) (CD antigen CD92)	-0.00872325	12.7763	0.0201363	0.984124	0.998783	-5.67074
Q6ZPR1	Cilia- and flagella-associated protein 97	0.3754	13.5553	-0.390158	0.701522	0.998783	-5.0748
Q6ZQI3	Malectin	-0.574153	13.845	0.946958	0.356109	0.998783	-5.06611
Q6ZQM8	UDP-glucuronosyltransferase 1A7 (UGT1A7) (EC 2.4.1.17) (UDP-glucuronosyltransferase 1-7C) (UDPGT 1-7C) (UGT1*7C) (UGT1-07C) (UGT1.7C) (UDP-glucuronosyltransferase 1A7C)	-0.932593	14.2467	1.86015	0.0768383	0.998783	-4.20162
Q6ZWM4	U6 snRNA-associated Sm-like protein LSm8	-0.081189	12.9754	0.0994359	0.921946	0.998783	-5.22296
Q6ZWN5	40S ribosomal protein S9	0.0677375	13.6373	-0.152278	0.880412	0.998783	-5.66021
Q6ZWQ7	Signal peptidase complex subunit 3 (Microsomal signal peptidase 22/23 kDa subunit) (SPC22/23) (SPase 22/23 kDa subunit)	-0.892786	12.6606	0.979228	0.341923	0.998783	-4.80759
Q6ZWU9;Q6ZWY3	40S ribosomal protein S27	-0.32973	14.5165	0.697065	0.493359	0.998783	-5.44892
Q6ZWV3	60S ribosomal protein L10 (Protein QM homolog) (Ribosomal protein L10)	-0.445745	14.0397	0.796404	0.435567	0.998783	-5.22936
Q6ZWV7	60S ribosomal protein L35	-0.468442	13.9593	1.08867	0.288559	0.998783	-5.13901
Q6ZWX6	Eukaryotic translation initiation factor 2 subunit 1 (Eukaryotic translation initiation factor 2 subunit alpha) (eIF-2-alpha) (eIF-2A) (eIF-2alpha)	-0.63789	11.6182	1.3504	0.192644	0.998783	-4.77188
Q76MZ3	Serine/threonine-protein phosphatase 2A 65 kDa regulatory subunit A alpha isoform (PP2A subunit A isoform PR65-alpha) (PP2A subunit A isoform R1-alpha)	-0.0544442	13.0156	0.0918168	0.92785	0.998783	-5.43753
Q78IK2	ATP synthase membrane subunit K, mitochondrial (ATP synthase membrane subunit DAPIT, mitochondrial) (Diabetes-associated protein in insulin-sensitive tissues) (Up-regulated during skeletal muscle growth protein 5)	11.6098	11.3996	-1.39875	0.180815	0.998783	-4.58717
Q78IK4	MICOS complex subunit Mic27 (Apolipoprotein O-like) (Protein FAM121A)	1.06087	11.2089	-1.28204	0.217943	0.998783	-4.59213
Q78IQ7	Zinc transporter ZIP4 (Activated in W/Wv mouse stomach 2) (mAWMS2) (Solute carrier family 39 member 4) (Zrt- and Irt-like protein 4) (ZIP-4)	-0.467886	15.426	0.848363	0.405742	0.998783	-5.34406
Q78ZA7	Nucleosome assembly protein 1-like 4	-0.305096	11.9132	0.569603	0.575936	0.998783	-5.29675
Q791V5	Mitochondrial carrier homolog 2 (Met-induced mitochondrial protein)	-0.189334	13.6446	0.406227	0.68866	0.998783	-5.5949
Q7M742	Secretoglobin family 1C member 1 (Secretoglobin RYD5)	-0.13736	10.4773	0.272441	0.788361	0.998783	-5.41465
Q7M758	Aminopeptidase NAALADL1 (EC 3.4.11.-) (N-acetylated-alpha-linked acidic dipeptidase-like protein) (NAALADase L)	0.329617	19.733	-0.621747	0.540758	0.998783	-5.49385
Q7TMB8	Cytoplasmic FMR1-interacting protein 1 (Specifically Rac1-associated protein 1) (Sra-1)	0.455027	12.0133	-0.843066	0.410174	0.998783	-5.14214
Q7TMF3	NADH dehydrogenase [ubiquinone] 1 alpha subcomplex subunit 12 (Complex I-B17.2) (CI-B17.2) (CIB17.2) (NADH-ubiquinone oxidoreductase subunit B17.2)	0.136424	11.8263	-0.23385	0.817872	0.998783	-5.3565
Q7TMR0	Lysosomal Pro-X carboxypeptidase (EC 3.4.16.2) (Proline carboxypeptidase) (Prolylcarboxypeptidase) (PRCP)	0.0619505	13.2715	-0.143255	0.887446	0.998783	-5.66144
Q7TMS5	Broad substrate specificity ATP-binding cassette transporter ABCG2 (EC 7.6.2.2) (ATP-binding cassette sub-family G member 2) (Breast cancer resistance protein 1 homolog) (Urate exporter) (CD antigen CD338)	0.286188	13.2458	-0.625429	0.538385	0.998783	-5.49177
Q7TNG5	Echinoderm microtubule-associated protein-like 2 (EMAP-2)	0.00214038	11.4014	-0.0026333	0.997929	0.998783	-5.12742
Q7TPR4	Alpha-actinin-1 (Alpha-actinin cytoskeletal isoform) (F-actin cross-linking protein) (Non-muscle alpha-actinin-1)	0.718692	12.0755	-0.839524	0.413442	0.998783	-4.89031
Q7TPR4;Q9JI91		-0.809568	11.9375	1.74557	0.0969229	0.998783	-4.29501
Q7TPZ8	Carboxypeptidase A1 (EC 3.4.17.1)	0.152009	19.8202	-0.157952	0.877257	0.998783	-5.65896
Q7TQ65	Transmembrane channel-like protein 4	0.0637601	13.6642	-0.107398	0.915652	0.998783	-5.4362
Q7TQI3	Ubiquitin thioesterase OTUB1 (EC 3.4.19.12) (Deubiquitinating enzyme OTUB1) (OTU domain-containing ubiquitin aldehyde-binding protein 1) (Otubain-1) (Ubiquitin-specific-processing protease OTUB1)	0.628322	11.1838	-0.760068	0.458177	0.998783	-4.93117
Q7TSV4	Phosphopentomutase (EC 5.4.2.7) (Glucose phosphomutase 2) (Phosphodeoxyribomutase) (Phosphoglucomutase-1) (Phosphoglucomutase-2) (PGM 2) (EC 5.4.2.2)	0.383141	12.2716	-0.695704	0.495434	0.998783	-5.23606
Q80SY4	E3 ubiquitin-protein ligase MIB1 (EC 2.3.2.27) (DAPK-interacting protein 1) (DIP-1) (Mind bomb homolog 1) (RING-type E3 ubiquitin transferase MIB1)	1.02694	11.9665	-1.49285	0.15267	0.998783	-4.45336
Q80T03	Mucin-6 (MUC-6) (Gastric mucin-6) (Secreted gel-forming mucin-6)	0.477436	14.49	-0.995931	0.33055	0.998783	-5.22359
Q80UM7	Mannosyl-oligosaccharide glucosidase (EC 3.2.1.106) (Glucosidase 1) (Glycoprotein-processing glucosidase I)	-0.225928	11.1588	0.274157	0.787443	0.998783	-5.10277
Q80V42	Carboxypeptidase M (CPM) (EC 3.4.17.12)	0.172858	12.0378	-0.43887	0.66521	0.998783	-5.58225
Q80VA0	N-acetylgalactosaminyltransferase 7 (EC 2.4.1.41) (Polypeptide GalNAc transferase 7) (GalNAc-T7) (pp-GaNTase 7) (Protein-UDP acetylgalactosaminyltransferase 7) (UDP-GalNAc:polypeptide N-acetylgalactosaminyltransferase 7)	-0.460986	12.7478	0.819891	0.422374	0.998783	-5.20037
Q80VQ0	Aldehyde dehydrogenase family 3 member B1 (EC 1.2.1.28) (EC 1.2.1.5) (EC 1.2.1.7) (Aldehyde dehydrogenase 7)	-0.102934	11.9673	0.228126	0.821849	0.998783	-5.57042
Q80W54	CAAX prenyl protease 1 homolog (EC 3.4.24.84) (Farnesylated proteins-converting enzyme 1) (FACE-1) (Prenyl protein-specific endoprotease 1) (Zinc metalloproteinase Ste24 homolog)	0.0769565	13.042	-0.163471	0.871701	0.998783	-5.65857
Q80X71	Transmembrane protein 106B	0.069117	11.8113	-0.166383	0.869437	0.998783	-5.65813
Q80X90	Filamin-B (FLN-B) (ABP-280-like protein) (Actin-binding-like protein) (Beta-filamin)	-0.397336	15.196	0.756354	0.457786	0.998783	-5.41013
Q80X90;Q8BTM8;Q8VHX6		-0.235371	12.3306	0.412294	0.684957	0.998783	-5.3684
Q80X90;Q8VHX6		-0.221507	11.6658	0.308183	0.761658	0.998783	-5.18925
Q80XI7	Vomeromodulin (BPI fold-containing family B member 9A)	0.257322	13.1834	-0.471739	0.642448	0.998783	-5.44716
Q80XL6	Acyl-CoA dehydrogenase family member 11 (ACAD-11) (EC 1.3.8.-)	-0.217472	13.1609	0.374316	0.712285	0.998783	-5.43494
Q80XN0	D-beta-hydroxybutyrate dehydrogenase, mitochondrial (EC 1.1.1.30) (3-hydroxybutyrate dehydrogenase) (BDH)	-0.185534	12.9925	0.288474	0.776972	0.998783	-5.54999
Q80YW5	B box and SPRY domain-containing protein	-0.324868	12.5206	0.361703	0.722267	0.998783	-5.08216
Q80Z19	Mucin-2 (MUC-2) (Colonic mucin) (MCM) (Secreted gel-forming mucin)	0.29818	21.1932	-0.517393	0.610255	0.998783	-5.54792
Q812G0	Alpha-1,3-mannosyl-glycoprotein 4-beta-N-acetylglucosaminyltransferase A (EC 2.4.1.145) (N-glycosyl-oligosaccharide-glycoprotein N-acetylglucosaminyltransferase IVa) (GlcNAc-T IVa) (GnT-IVa) (N-acetylglucosaminyltransferase IVa) (UDP-N-acetylglucosamine: alpha-1,3-D-mannoside beta-1,4-N-acetylglucosaminyltransferase IVa) [Cleaved into: Alpha-1,3-mannosyl-glycoprotein 4-beta-N-acetylglucosaminyltr…	-0.194571	12.1728	0.35582	0.726081	0.998783	-5.38689
Q8BFR4	N-acetylglucosamine-6-sulfatase (EC 3.1.6.14) (Glucosamine-6-sulfatase) (G6S)	0.161904	14.9221	-0.358867	0.723255	0.998783	-5.61154
Q8BFR5	Elongation factor Tu, mitochondrial	-0.0967178	19.9144	0.163049	0.872029	0.998783	-5.65864
Q8BFS6	Serine/threonine-protein phosphatase CPPED1 (EC 3.1.3.16) (Calcineurin-like phosphoesterase domain-containing protein 1)	-0.378727	14.2684	0.833173	0.414064	0.998783	-5.35546
Q8BFZ3	Beta-actin-like protein 2 (Kappa-actin)	0.729498	15.4713	-1.24631	0.227591	0.998783	-4.9798
Q8BFZ9	Erlin-2 (Endoplasmic reticulum lipid raft-associated protein 2) (Stomatin-prohibitin-flotillin-HflC/K domain-containing protein 2) (SPFH domain-containing protein 2)	-0.351813	13.0512	0.641566	0.528392	0.998783	-5.40394
Q8BFZ9;Q91X78		-0.697788	12.8491	1.43113	0.167016	0.998783	-4.77128
Q8BG05	Heterogeneous nuclear ribonucleoprotein A3 (hnRNP A3)	0.683768	12.1908	-0.792871	0.439357	0.998783	-4.91543
Q8BGA2	LHFPL tetraspan subfamily member 2 protein (Lipoma HMGIC fusion partner-like 2 protein)	-0.68313	13.2741	0.707294	0.489475	0.998783	-4.95695
Q8BGH2	Sorting and assembly machinery component 50 homolog	-0.535836	12.4404	1.05952	0.302555	0.998783	-5.05994
Q8BGQ7	Alanine--tRNA ligase, cytoplasmic (EC 6.1.1.7) (Alanyl-tRNA synthetase) (AlaRS) (Protein sticky) (Sti)	-0.25892	11.7774	0.444099	0.662529	0.998783	-5.29731
Q8BH24	Transmembrane 9 superfamily member 4	-0.30037	12.6269	0.514725	0.612962	0.998783	-5.3281
Q8BH59;Q9QXX4		-0.324336	12.9239	0.644594	0.526843	0.998783	-5.36242
Q8BH95	Enoyl-CoA hydratase, mitochondrial (mECH) (mECH1) (EC 4.2.1.17) (EC 5.3.3.8) (Enoyl-CoA hydratase 1) (ECHS1) (Short-chain enoyl-CoA hydratase) (SCEH)	0.401038	13.0627	-0.876271	0.390734	0.998783	-5.32264
Q8BHG3	Cell cycle control protein 50B (Transmembrane protein 30B)	0.671508	12.6761	-0.720673	0.480828	0.998783	-4.95096
Q8BHG3;Q8VEK0		0.07421	13.6815	-0.16057	0.873957	0.998783	-5.65901
Q8BHH8	Clarin-3 (Transmembrane protein 12)	0.0966265	13.6672	-0.163731	0.87166	0.998783	-5.48443
Q8BHL4	Retinoic acid-induced protein 3 (G-protein coupled receptor family C group 5 member A) (Retinoic acid-induced gene 1 protein) (RAIG-1)	0.785763	13.9074	-1.81522	0.0837084	0.998783	-4.26632
Q8BHN3	Neutral alpha-glucosidase AB (EC 3.2.1.207) (Alpha-glucosidase 2) (Glucosidase II subunit alpha)	-1.01	13.9806	2.15232	0.043078	0.998783	-3.75612
Q8BI08	Protein MAL2	0.344392	14.8449	-0.787386	0.439798	0.998783	-5.38864
Q8BIJ6	Isoleucine--tRNA ligase, mitochondrial (EC 6.1.1.5) (Isoleucyl-tRNA synthetase) (IleRS)	-0.388244	12.3745	0.782971	0.443228	0.998783	-5.27666
Q8BJ48	N-acetylglucosamine-1-phosphodiester alpha-N-acetylglucosaminidase (EC 3.1.4.45) (Mannose 6-phosphate-uncovering enzyme) (Phosphodiester alpha-GlcNAcase)	0.5291	11.7506	-1.10004	0.28496	0.998783	-4.98875
Q8BJ64	Choline dehydrogenase, mitochondrial (CDH) (CHD) (EC 1.1.99.1)	-0.486535	13.9491	0.982389	0.337021	0.998783	-5.23537
Q8BK48	Pyrethroid hydrolase Ces2e (EC 3.1.1.88) (Carboxylic ester hydrolase) (EC 3.1.1.-) (carboxylesterase 2E)	-0.620027	15.3929	1.06211	0.30134	0.998783	-5.16309
Q8BK48;Q8QZR3		-0.305965	14.5572	0.458483	0.653244	0.998783	-5.49511
Q8BK48;Q8QZR3;Q91WG0		-0.0895925	15.922	0.161911	0.872914	0.998783	-5.65881
Q8BK48;Q91WG0		-0.253277	16.434	0.418925	0.679629	0.998783	-5.58999
Q8BK63	Casein kinase I isoform alpha (CKI-alpha) (EC 2.7.11.1) (CK1)	-0.497659	12.2073	0.57507	0.573177	0.998783	-5.01394
Q8BLF1	Neutral cholesterol ester hydrolase 1 (NCEH) (EC 3.1.1.-) (Acetylalkylglycerol acetylhydrolase) (2-acetyl MAGE hydrolase) (EC 3.1.1.71) (Arylacetamide deacetylase-like 1) (Chlorpyrifos oxon-binding protein) (CPO-BP)	-0.477367	11.8289	0.875055	0.392986	0.998783	-5.11958
Q8BLN5	Lanosterol synthase (EC 5.4.99.7) (2,3-epoxysqualene--lanosterol cyclase) (Oxidosqualene--lanosterol cyclase) (OSC)	0.326003	11.7777	-0.460982	0.650292	0.998783	-5.15762
Q8BM96	Adhesion G-protein coupled receptor G7 (G-protein coupled receptor 128)	0.123495	14.3989	-0.266397	0.792515	0.998783	-5.63815
Q8BMD8	Calcium-binding mitochondrial carrier protein SCaMC-1 (Small calcium-binding mitochondrial carrier protein 1) (Solute carrier family 25 member 24)	-0.571642	13.6428	0.999914	0.331585	0.998783	-5.21777
Q8BMF4	Dihydrolipoyllysine-residue acetyltransferase component of pyruvate dehydrogenase complex, mitochondrial (EC 2.3.1.12) (Dihydrolipoamide acetyltransferase component of pyruvate dehydrogenase complex) (Pyruvate dehydrogenase complex component E2) (PDC-E2) (PDCE2)	-0.258233	14.0594	0.518958	0.609447	0.998783	-5.46715
Q8BMS1	Trifunctional enzyme subunit alpha, mitochondrial (Monolysocardiolipin acyltransferase) (EC 2.3.1.-) (TP-alpha) [Includes: Long-chain enoyl-CoA hydratase (EC 4.2.1.17); Long chain 3-hydroxyacyl-CoA dehydrogenase (EC 1.1.1.211)]	-0.208345	13.9641	0.377566	0.709908	0.998783	-5.48257
Q8BND5	Sulfhydryl oxidase 1 (mSOx) (EC 1.8.3.2) (Quiescin Q6) (Skin sulfhydryl oxidase)	0.0747252	14.5319	-0.157968	0.875981	0.998783	-5.65939
Q8BP47	Asparagine--tRNA ligase, cytoplasmic (EC 6.1.1.22) (Asparaginyl-tRNA synthetase) (AsnRS) (Asparaginyl-tRNA synthetase 1)	0.463785	13.491	-0.670798	0.51252	0.998783	-5.2488
Q8BSY0	Aspartyl/asparaginyl beta-hydroxylase (EC 1.14.11.16) (Aspartate beta-hydroxylase) (ASP beta-hydroxylase) (Peptide-aspartate beta-dioxygenase)	-0.0357381	10.2329	0.0436948	0.965684	0.998783	-5.12821
Q8BT60	Copine-3 (Copine III)	0.0721018	14.8997	-0.151483	0.881032	0.998783	-5.66032
Q8BT60;Q8C166		0.31722	16.3759	-0.596831	0.55696	0.998783	-5.50763
Q8BTY1	Kynurenine--oxoglutarate transaminase 1 (EC 2.6.1.7) (Cysteine-S-conjugate beta-lyase) (EC 4.4.1.13) (Glutamine transaminase K) (GTK) (Glutamine--phenylpyruvate transaminase) (EC 2.6.1.64) (Kynurenine aminotransferase 1) (Kynurenine aminotransferase I) (KATI) (Kynurenine--oxoglutarate transaminase I)	-0.135056	11.0616	0.290144	0.774827	0.998783	-5.50852
Q8BVF7	Gamma-secretase subunit APH-1A (APH-1a) (Aph-1alpha)	0.523944	12.2918	-0.605363	0.552872	0.998783	-5.00171
Q8BVI4	Dihydropteridine reductase (EC 1.5.1.34) (HDHPR) (Quinoid dihydropteridine reductase)	-0.192499	11.8718	0.22616	0.823917	0.998783	-5.10967
Q8BW75	Amine oxidase [flavin-containing] B (EC 1.4.3.21) (EC 1.4.3.4) (Monoamine oxidase type B) (MAO-B)	-0.837813	14.4815	1.23332	0.237085	0.998783	-4.92583
Q8BWF0	Succinate-semialdehyde dehydrogenase, mitochondrial (EC 1.2.1.24) (Aldehyde dehydrogenase family 5 member A1) (NAD(+)-dependent succinic semialdehyde dehydrogenase)	-0.0381861	12.0017	0.0687816	0.945916	0.998783	-5.43912
Q8BWN8	Peroxisomal succinyl-coenzyme A thioesterase (EC 3.1.2.3) (Acyl-coenzyme A thioesterase 4) (Acyl-CoA thioesterase 4) (PTE-2b) (Peroxisomal acyl coenzyme A thioester hydrolase Ib) (Peroxisomal long-chain acyl-CoA thioesterase Ib) (PTE-Ib)	-0.06884	12.1126	0.129021	0.898761	0.998783	-5.434
Q8BWQ1	UDP-glucuronosyltransferase 2A3 (UDPGT 2A3) (EC 2.4.1.17)	-0.284688	13.1416	0.528499	0.60293	0.998783	-5.4627
Q8BWR2	PITH domain-containing protein 1	-0.465737	13.5683	1.05844	0.301801	0.998783	-5.16731
Q8BWR8	Rhophilin-2 (GTP-Rho-binding protein 2)	0.00128953	12.1108	-0.00238295	0.998125	0.998783	-5.44116
Q8BWT1	3-ketoacyl-CoA thiolase, mitochondrial (EC 2.3.1.16) (Acetyl-CoA acetyltransferase) (EC 2.3.1.9) (Acetyl-CoA acyltransferase) (Acyl-CoA hydrolase, mitochondrial) (EC 3.1.2.-, EC 3.1.2.1, EC 3.1.2.2) (Beta-ketothiolase) (Mitochondrial 3-oxoacyl-CoA thiolase)	-0.273319	13.1402	0.484453	0.634302	0.998783	-5.56192
Q8BWY3	Eukaryotic peptide chain release factor subunit 1 (Eukaryotic release factor 1) (eRF1)	-0.312719	11.3702	0.429146	0.672872	0.998783	-5.15907
Q8BXA1	Golgi integral membrane protein 4 (Decapacitation factor 10) (Golgi phosphoprotein 4)	1.69255	13.9473	-1.78006	0.0939031	0.998783	-4.15268
Q8BXK9	Chloride intracellular channel protein 5	0.0421267	12.4256	-0.0865175	0.931954	0.998783	-5.54276
Q8BYC6	Serine/threonine-protein kinase TAO3 (EC 2.7.11.1) (Thousand and one amino acid protein 3)	0.062754	11.3526	-0.0754048	0.94082	0.998783	-5.12545
Q8BYF6	Sodium-coupled monocarboxylate transporter 1 (Electrogenic sodium monocarboxylate cotransporter) (Solute carrier family 5 member 8)	0.00736025	13.3672	-0.0146417	0.988455	0.998783	-5.67083
Q8BYY9	Serine protease inhibitor A3B (Serpin A3B)	0.623496	12.4885	-0.827197	0.418878	0.998783	-4.97365
Q8C129	Leucyl-cystinyl aminopeptidase (Cystinyl aminopeptidase) (EC 3.4.11.3) (Oxytocinase) (OTase)	0.305336	11.3591	-0.366793	0.718539	0.998783	-5.08088
Q8C165	N-fatty-acyl-amino acid synthase/hydrolase PM20D1 (EC 3.5.1.114) (EC 3.5.1.14) (Peptidase M20 domain-containing protein 1) (PM20D1)	0.0591195	14.8566	-0.129249	0.898382	0.998783	-5.6632
Q8C166	Copine-1 (Copine I)	0.209827	14.2062	-0.475595	0.639242	0.998783	-5.56688
Q8C196	Carbamoyl-phosphate synthase [ammonia], mitochondrial (EC 6.3.4.16) (Carbamoyl-phosphate synthetase I) (CPSase I)	0.627545	14.329	-0.654695	0.521888	0.998783	-4.98093
Q8C1A5	Thimet oligopeptidase (EC 3.4.24.15)	0.470954	11.7539	-0.555863	0.585931	0.998783	-5.0213
Q8C1B7;Q8CHH9		-0.939189	11.4151	1.12568	0.276766	0.998783	-4.70864
Q8C1N8	Alpha-defensin 22 (Defensin-related cryptdin-22)	0.355077	20.4057	-0.580719	0.567571	0.998783	-5.51625
Q8C3K6	Sodium/glucose cotransporter 1 (Na(+)/glucose cotransporter 1) (High affinity sodium-glucose cotransporter) (Solute carrier family 5 member 1)	0.381103	15.7779	-0.743456	0.465391	0.998783	-5.41882
Q8C522	Endonuclease domain-containing 1 protein (EC 3.1.30.-)	-0.95368	12.4646	1.51175	0.150471	0.998783	-4.52728
Q8C6C9	Protein LEG1 homolog	-0.178359	17.9766	0.34055	0.736804	0.998783	-5.61743
Q8C6D4	BEN domain-containing protein 5	1.31672	13.4803	-0.633554	0.584327	0.998783	-5.17229
Q8C7X2	ER membrane protein complex subunit 1	-0.247569	10.5343	0.293422	0.77281	0.998783	-5.09764
Q8CAQ8	MICOS complex subunit Mic60 (Mitochondrial inner membrane protein) (Mitofilin)	-0.89512	13.1275	1.10491	0.289462	0.998783	-4.8866
Q8CAY6	Acetyl-CoA acetyltransferase, cytosolic (EC 2.3.1.9) (Cytosolic acetoacetyl-CoA thiolase)	-0.263833	12.6166	0.290237	0.775332	0.998783	-5.09822
Q8CC88	von Willebrand factor A domain-containing protein 8	-0.111109	11.7015	0.203172	0.841263	0.998783	-5.42342
Q8CCH2	NHL repeat-containing protein 3	-0.213638	13.5968	0.449868	0.657386	0.998783	-5.57777
Q8CG76	Aflatoxin B1 aldehyde reductase member 2 (EC 1.1.1.n11) (Succinic semialdehyde reductase) (SSA reductase)	0.537499	11.0505	-0.651825	0.523691	0.998783	-4.98096
Q8CGC7	Bifunctional glutamate/proline--tRNA ligase (Bifunctional aminoacyl-tRNA synthetase) [Includes: Glutamate--tRNA ligase (EC 6.1.1.17) (Glutamyl-tRNA synthetase) (GluRS); Proline--tRNA ligase (EC 6.1.1.15) (Prolyl-tRNA synthetase) (ProRS)]	-0.119014	11.6923	0.167793	0.868711	0.998783	-5.21604
Q8CGP5	Histone H2A type 1-F	1.11214	12.7854	-1.96755	0.0664472	0.998783	-4.0637
Q8CGR5	Kallikrein-14 (EC 3.4.21.-) (Glandular kallikrein KLK14) (mGK14) (Kallikrein related-peptidase 14)	0.868266	10.5164	-1.0618	0.303961	0.998783	-4.75363
Q8CHP8	Glycerol-3-phosphate phosphatase (G3PP) (EC 3.1.3.21) (Aspartate-based ubiquitous Mg(2+)-dependent phosphatase) (AUM) (EC 3.1.3.48) (Phosphoglycolate phosphatase) (PGP)	0.536977	12.7176	-0.906422	0.376599	0.998783	-5.09672
Q8CHT0	Delta-1-pyrroline-5-carboxylate dehydrogenase, mitochondrial (P5C dehydrogenase) (EC 1.2.1.88) (Aldehyde dehydrogenase family 4 member A1) (L-glutamate gamma-semialdehyde dehydrogenase)	0.182065	11.7475	-0.254268	0.802315	0.998783	-5.20223
Q8CI94	Glycogen phosphorylase, brain form (EC 2.4.1.1)	-0.126334	13.0724	0.209986	0.836019	0.998783	-5.42221
Q8CI94;Q9WUB3		-0.579699	13.6556	1.31211	0.203557	0.998783	-4.90858
Q8CIE6	Coatomer subunit alpha (Alpha-coat protein) (Alpha-COP) [Cleaved into: Xenin (Xenopsin-related peptide); Proxenin]	-0.296214	14.8399	0.602082	0.553525	0.998783	-5.50477
Q8JZK9	Hydroxymethylglutaryl-CoA synthase, cytoplasmic (HMG-CoA synthase) (EC 2.3.3.10) (3-hydroxy-3-methylglutaryl coenzyme A synthase)	1.18931	11.6534	-1.41096	0.177246	0.998783	-4.48764
Q8JZM8	Mucin-4 (MUC-4) (Ascites sialoglycoprotein) (ASGP) (Pancreatic adenocarcinoma mucin) (Testis mucin) [Cleaved into: Mucin-4 alpha chain (Ascites sialoglycoprotein 1) (ASGP-1); Mucin-4 beta chain (Ascites sialoglycoprotein 2) (ASGP-2)]	-0.0501882	12.3909	0.121931	0.904105	0.998783	-5.66405
Q8JZN5	Complex I assembly factor ACAD9, mitochondrial (Acyl-CoA dehydrogenase family member 9) (ACAD-9) (EC 1.3.8.-)	0.0229164	12.6962	-0.0379478	0.970144	0.998783	-5.44054
Q8JZQ5	Amiloride-sensitive amine oxidase [copper-containing] (DAO) (Diamine oxidase) (EC 1.4.3.22) (Amiloride-binding protein 1) (Amine oxidase copper domain-containing protein 1) (Histaminase)	0.0325823	16.544	-0.0634473	0.950007	0.998783	-5.66907
Q8JZU2	Tricarboxylate transport protein, mitochondrial (Citrate transport protein) (CTP) (Solute carrier family 25 member 1) (Tricarboxylate carrier protein)	-0.379066	14.1271	0.748177	0.462598	0.998783	-5.41566
Q8K010	5-oxoprolinase (EC 3.5.2.9) (5-oxo-L-prolinase) (5-OPase) (Pyroglutamase)	-0.0398597	11.6802	0.0687289	0.946001	0.998783	-5.37639
Q8K0C5	Zymogen granule membrane protein 16 (Zymogen granule protein 16) (Secretory lectin ZG16)	0.407789	20.7976	-0.739211	0.46791	0.998783	-5.42165
Q8K0C9	GDP-mannose 4,6 dehydratase (EC 4.2.1.47) (GDP-D-mannose dehydratase) (GMD)	0.571248	15.8661	-1.04571	0.307506	0.998783	-5.17902
Q8K0D2	Hyaluronan-binding protein 2 (EC 3.4.21.-) (Plasma hyaluronan-binding protein) [Cleaved into: Hyaluronan-binding protein 2 50 kDa heavy chain; Hyaluronan-binding protein 2 50 kDa heavy chain alternate form; Hyaluronan-binding protein 2 27 kDa light chain; Hyaluronan-binding protein 2 27 kDa light chain alternate form]	1.50046	11.8837	-1.76205	0.0969932	0.998783	-4.1701
Q8K0E7	Serine incorporator 2 (Tumor differentially expressed protein 2-like)	0.00439375	12.4828	-0.00822586	0.993522	0.998783	-5.48893
Q8K0L2	Ectonucleoside triphosphate diphosphohydrolase 8 (E-NTPDase 8) (NTPDase 8) (NTPDase8) (EC 3.6.1.5)	0.087552	12.6441	-0.204188	0.84016	0.998783	-5.65166
Q8K157	Galactose mutarotase (EC 5.1.3.3) (Aldose 1-epimerase)	-0.394075	13.5274	0.869744	0.394211	0.998783	-5.3277
Q8K183	Pyridoxal kinase (EC 2.7.1.35) (Pyridoxine kinase)	-0.484056	12.1332	0.866574	0.397496	0.998783	-5.12593
Q8K1F9	Lactase-like protein (Klotho/lactase-phlorizin hydrolase-related protein)	0.370808	16.4834	-0.724416	0.476754	0.998783	-5.4314
Q8K1H9	Odorant-binding protein 2a (Epididymal-specific lipocalin-13)	-0.674264	15.3579	1.30195	0.206945	0.998783	-4.91984
Q8K1R3	Polyribonucleotide nucleotidyltransferase 1, mitochondrial (EC 2.7.7.8) (3'-5' RNA exonuclease OLD35) (PNPase old-35) (Polynucleotide phosphorylase 1) (PNPase 1) (Polynucleotide phosphorylase-like protein)	0.237537	14.1849	-0.392336	0.699383	0.998783	-5.37888
Q8K1R7	Serine/threonine-protein kinase Nek9 (EC 2.7.11.1) (Nercc1 kinase) (Never in mitosis A-related kinase 9) (NimA-related protein kinase 9)	-0.367233	13.858	0.868822	0.394704	0.998783	-5.32842
Q8K1Z0	Ubiquinone biosynthesis protein COQ9, mitochondrial	0.502465	12.9473	-0.628438	0.538005	0.998783	-5.079
Q8K2B3	Succinate dehydrogenase [ubiquinone] flavoprotein subunit, mitochondrial (EC 1.3.5.1) (Flavoprotein subunit of complex II) (Fp)	-0.951269	15.1623	1.51227	0.149688	0.998783	-4.67528
Q8K2I4	Beta-mannosidase (EC 3.2.1.25) (Lysosomal beta A mannosidase) (Mannanase) (Mannase)	-0.0622085	13.3249	0.137109	0.892243	0.998783	-5.66224
Q8K354	Carbonyl reductase [NADPH] 3 (EC 1.1.1.184) (NADPH-dependent carbonyl reductase 3) (Quinone reductase CBR3) (EC 1.6.5.10)	-0.91705	11.7147	1.08456	0.294058	0.998783	-4.73729
Q8K385	Ferric-chelate reductase 1 (EC 1.-.-.-) (Stromal cell-derived receptor 2) (SDR-2)	0.261934	13.5244	-0.315018	0.756552	0.998783	-5.17676										Q9R0H5	Q9Z331
Q8K3J1	NADH dehydrogenase [ubiquinone] iron-sulfur protein 8, mitochondrial (EC 7.1.1.2) (Complex I-23kD) (CI-23kD) (NADH-ubiquinone oxidoreductase 23 kDa subunit)	-0.257289	12.9529	0.433782	0.669563	0.998783	-5.35427
Q8K3K7	1-acyl-sn-glycerol-3-phosphate acyltransferase beta (EC 2.3.1.51) (1-acylglycerol-3-phosphate O-acyltransferase 2) (1-AGP acyltransferase 2) (1-AGPAT 2) (Lysophosphatidic acid acyltransferase beta) (LPAAT-beta)	-0.120875	11.8113	0.146426	0.885294	0.998783	-5.12
Q8K3X6	Ankyrin repeat and SAM domain-containing protein 4B (Harmonin-interacting ankyrin repeat-containing protein) (Harp)	0.122097	13.2233	-0.230455	0.820184	0.998783	-5.52237
Q8K419	Galectin-4 (Gal-4) (Lactose-binding lectin 4)	-0.0367767	16.6243	0.0693243	0.945383	0.998783	-5.66871
Q8QZR3	Pyrethroid hydrolase Ces2a (EC 3.1.1.88) (Carboxylic ester hydrolase 2A) (EC 3.1.1.-) (carboxylesterase 2A)	-0.832816	14.8128	1.62534	0.11891	0.998783	-4.52716
Q8QZR5	Alanine aminotransferase 1 (ALT1) (EC 2.6.1.2) (Glutamate pyruvate transaminase 1) (GPT 1) (Glutamic--alanine transaminase 1) (Glutamic--pyruvic transaminase 1)	0.351095	11.5035	-0.75626	0.458251	0.998783	-5.33331
Q8QZT1	Acetyl-CoA acetyltransferase, mitochondrial (EC 2.3.1.9) (Acetoacetyl-CoA thiolase)	0.316416	12.9607	-0.671441	0.509212	0.998783	-5.46475
Q8QZW3	Protein FAM151A	0.0658075	14.9083	-0.128467	0.898994	0.998783	-5.6633
Q8R016	Bleomycin hydrolase (BH) (BLM hydrolase) (BMH) (EC 3.4.22.40)	0.310054	15.2902	-0.639939	0.529089	0.998783	-5.48344
Q8R059	UDP-glucose 4-epimerase (EC 5.1.3.2) (Galactowaldenase) (UDP-N-acetylglucosamine 4-epimerase) (UDP-GlcNAc 4-epimerase) (EC 5.1.3.7) (UDP-galactosamine 4-epimerase) (UDP-GalNAc 4-epimerase) (UDP-galactose 4-epimerase)	0.476359	12.2541	-0.900884	0.378849	0.998783	-5.14197
Q8R0F8	Acylpyruvase FAHD1, mitochondrial (EC 3.7.1.5) (Fumarylacetoacetate hydrolase domain-containing protein 1) (Oxaloacetate decarboxylase) (OAA decarboxylase) (EC 4.1.1.112)	0.169479	12.1788	-0.241013	0.813824	0.998783	-5.64309
Q8R0I0	Angiotensin-converting enzyme 2 (EC 3.4.17.23) (ACE-related carboxypeptidase) (EC 3.4.17.-) [Cleaved into: Processed angiotensin-converting enzyme 2]	0.579509	17.5142	-1.04561	0.307553	0.998783	-5.17911
Q8R0K2	E3 ubiquitin-protein ligase TRIM31 (EC 2.3.2.27) (Tripartite motif-containing protein 31)	-0.367867	10.5853	0.303963	0.769523	0.998783	-5.09336
Q8R0Y6	Cytosolic 10-formyltetrahydrofolate dehydrogenase (10-FTHFDH) (FDH) (EC 1.5.1.6) (Aldehyde dehydrogenase family 1 member L1)	-0.0863403	13.0946	0.16493	0.870729	0.998783	-5.53394
Q8R143	Pituitary tumor-transforming gene 1 protein-interacting protein (Pituitary tumor-transforming gene protein-binding factor) (PBF) (PTTG-binding factor)	0.274738	15.8992	-0.536224	0.597403	0.998783	-5.53887
Q8R146	Acylamino-acid-releasing enzyme (AARE) (EC 3.4.19.1) (Acyl-peptide hydrolase) (APH) (Acylaminoacyl-peptidase)	0.134771	15.4832	-0.270997	0.789022	0.998783	-5.63701
Q8R1I1	Cytochrome b-c1 complex subunit 9 (Complex III subunit 9) (Complex III subunit X) (Cytochrome c1 non-heme 7 kDa protein) (Ubiquinol-cytochrome c reductase complex 7.2 kDa protein)	0.297412	12.0016	-0.520918	0.608727	0.998783	-5.32538
Q8R1J1	Transmembrane 6 superfamily member 2	0.60305	11.4243	-0.722533	0.480309	0.998783	-4.94968
Q8R1M8	Mucosal pentraxin	0.818408	19.9836	-1.36903	0.185365	0.998783	-4.84413
Q8R1V4	Transmembrane emp24 domain-containing protein 4 (Endoplasmic reticulum stress-response protein 25) (ERS25) (p24 family protein alpha-3) (p24alpha3) (p26)	-0.576243	12.2185	0.665309	0.515251	0.998783	-4.97623
Q8R2S8	CD177 antigen (CD antigen CD177)	0.255865	13.3097	-0.544626	0.591712	0.998783	-5.53473
Q8R3B1	1-phosphatidylinositol 4,5-bisphosphate phosphodiesterase delta-1 (EC 3.1.4.11) (Phosphoinositide phospholipase C-delta-1) (Phospholipase C-delta-1) (PLC-delta-1)	-0.270288	12.1852	0.312857	0.758397	0.998783	-5.09351
Q8R3G9	Tetraspanin-8 (Tspan-8)	0.484598	18.14	-0.918018	0.368968	0.998783	-5.28939
Q8R4N0	Citramalyl-CoA lyase, mitochondrial (EC 4.1.3.25) ((3S)-malyl-CoA thioesterase) (EC 3.1.2.30) (Beta-methylmalate synthase) (EC 2.3.3.-) (Citrate lyase subunit beta-like protein, mitochondrial) (Citrate lyase beta-like) (Malate synthase) (EC 2.3.3.9)	0.0383233	13.0209	-0.0478001	0.962428	0.998783	-5.22585
Q8VBT0	Thioredoxin-related transmembrane protein 1 (Thioredoxin domain-containing protein 1)	211.578	12.337	-1.06923	0.300703	0.998783	-4.59512
Q8VC28	Aldo-keto reductase family 1 member C13 (EC 1.1.1.-)	-0.532658	12.868	1.04404	0.308901	0.998783	-5.18008
Q8VCA5	Transmembrane protease serine 4 (EC 3.4.21.-) (Channel-activating protease 4) (mCAP2) [Cleaved into: Transmembrane protease serine 4 catalytic chain]	-0.130126	11.7384	0.314705	0.756071	0.998783	-5.62522
Q8VCC2	Liver carboxylesterase 1 (EC 3.1.1.1) (Acyl-coenzyme A:cholesterol acyltransferase) (Carboxylesterase 1G) (Cholesteryl ester hydrolase) (CEH) (EC 3.1.1.13) (ES-x)	0.411958	11.809	-0.776906	0.447231	0.998783	-5.18637
Q8VCC2;Q91WU0		-0.00339	12.5149	0.0037771	0.997033	0.998783	-5.12742
Q8VCF1	Soluble calcium-activated nucleotidase 1 (SCAN-1) (EC 3.6.1.6) (Apyrase homolog)	-0.048719	11.3957	0.0584387	0.954117	0.998783	-5.12624
Q8VCH6	Delta(24)-sterol reductase (EC 1.3.1.72) (24-dehydrocholesterol reductase) (3-beta-hydroxysterol Delta-24-reductase)	0.662332	12.0629	-0.824388	0.420773	0.998783	-4.95599
Q8VCI0	Phospholipase B-like 1 (EC 3.1.1.-) (LAMA-like protein 1) (Lamina ancestor homolog 1) (Phospholipase B domain-containing protein 1) [Cleaved into: Phospholipase B-like 1 chain A; Phospholipase B-like 1 chain B; Phospholipase B-like 1 chain C]	0.629398	14.8964	-1.34988	0.191337	0.998783	-4.86607
Q8VCN5	Cystathionine gamma-lyase (CGL) (CSE) (EC 4.4.1.1) (Cysteine desulfhydrase) (Cysteine-protein sulfhydrase) (Gamma-cystathionase) (Homocysteine desulfhydrase) (EC 4.4.1.2)	0.192786	16.1829	-0.383637	0.70508	0.998783	-5.60309
Q8VCT3	Aminopeptidase B (AP-B) (EC 3.4.11.6) (Arginine aminopeptidase) (Arginyl aminopeptidase) (Cytosol aminopeptidase IV)	0.836472	11.8783	-1.39438	0.18102	0.998783	-4.61666
Q8VCT4	Carboxylesterase 1D (Carboxylesterase 3) (EC 3.1.1.1, EC 3.1.1.67) (Fatty acid ethyl ester synthase) (FAEE synthase) (Triacylglycerol hydrolase) (TGH)	-0.0489739	12.4259	0.101611	0.92007	0.998783	-5.58351
Q8VCW8	Medium-chain acyl-CoA ligase ACSF2, mitochondrial (EC 6.2.1.2)	-0.860531	12.5697	1.47377	0.160257	0.998783	-4.66324
Q8VDD5	Myosin-9 (Cellular myosin heavy chain, type A) (Myosin heavy chain 9) (Myosin heavy chain, non-muscle IIa) (Non-muscle myosin heavy chain A) (NMMHC-A) (Non-muscle myosin heavy chain IIa) (NMMHC II-a) (NMMHC-IIA)	-0.126112	13.6326	0.246084	0.807992	0.998783	-5.64295
Q8VDM4	26S proteasome non-ATPase regulatory subunit 2 (26S proteasome regulatory subunit RPN1) (26S proteasome regulatory subunit S2) (26S proteasome subunit p97)	-0.0835475	11.5643	0.144204	0.887022	0.998783	-5.37066
Q8VDN2	Sodium/potassium-transporting ATPase subunit alpha-1 (Na(+)/K(+) ATPase alpha-1 subunit) (EC 7.2.2.13) (Sodium pump subunit alpha-1)	-0.192404	15.9771	0.304735	0.76407	0.998783	-5.62774
Q8VDN2;Q9WV27		-0.556869	15.0568	0.955708	0.352003	0.998783	-5.2565
Q8VDN2;Q9WV27;Q9Z1W8		-0.0537475	15.266	0.0833039	0.934653	0.998783	-5.66767
Q8VDN2;Q9Z1W8		-1.27765	12.9722	1.35175	0.195103	0.998783	-4.53653
Q8VE70	Programmed cell death protein 10 (TF-1 cell apoptosis-related protein 15)	0.284116	12.8909	-0.303834	0.765138	0.998783	-5.09683
Q8VEK0	Cell cycle control protein 50A (P4-ATPase flippase complex beta subunit TMEM30A) (Transmembrane protein 30A)	0.019558	10.8417	-0.0499497	0.960632	0.998783	-5.66978
Q8VEK3	Heterogeneous nuclear ribonucleoprotein U (hnRNP U) (Scaffold-attachment factor A) (SAF-A)	0.106435	13.1688	-0.213935	0.83275	0.998783	-5.56749
Q8VEM8	Phosphate carrier protein, mitochondrial (Phosphate transport protein) (PTP) (Solute carrier family 25 member 3)	-0.290476	16.4356	0.52641	0.604085	0.998783	-5.54363
Q8VEN2	Placenta-expressed transcript 1 protein (Antigen mAgK114)	0.40414	13.5704	-0.874037	0.391922	0.998783	-5.32437
Q8VHF2	Cadherin-related family member 5 (Mu-protocadherin)	0.574337	18.7164	-0.999734	0.328749	0.998783	-5.22025
Q8VHQ9	Acyl-coenzyme A thioesterase 11 (Acyl-CoA thioesterase 11) (EC 3.1.2.-) (Acyl-CoA thioester hydrolase 11) (Adipose-associated thioesterase) (Brown fat-inducible thioesterase) (BFIT) (Palmitoyl-coenzyme A thioesterase) (EC 3.1.2.2)	-0.527355	11.967	0.979016	0.339789	0.998783	-5.08701
Q8VHX6	Filamin-C (FLN-C) (ABP-280-like protein) (ABP-L) (Actin-binding-like protein) (Filamin-2) (Gamma-filamin)	0.280023	11.951	-0.310361	0.760259	0.998783	-5.05967
Q91V41	Ras-related protein Rab-14	-0.231007	13.1021	0.45116	0.656696	0.998783	-5.49654
Q91V61	Sideroflexin-3	0.227028	13.0051	-0.387079	0.703202	0.998783	-5.37698
Q91V76	Ester hydrolase C11orf54 homolog (EC 3.1.-.-)	-0.0340667	15.6085	0.067775	0.946602	0.998783	-5.66881
Q91V92	ATP-citrate synthase (EC 2.3.3.8) (ATP-citrate (pro-S-)-lyase) (Citrate cleavage enzyme)	0.217237	13.02	-0.40942	0.686778	0.998783	-5.47145
Q91VA1	Choline transporter-like protein 4 (Solute carrier family 44 member 4) (Thiamine pyrophosphate transporter 1) (mTPPT1)	0.23148	17.047	-0.458282	0.651427	0.998783	-5.57428
Q91VC3	Eukaryotic initiation factor 4A-III (eIF-4A-III) (eIF4A-III) (EC 3.6.4.13) (ATP-dependent RNA helicase DDX48) (ATP-dependent RNA helicase eIF4A-3) (DEAD box protein 48) (Eukaryotic translation initiation factor 4A isoform 3) [Cleaved into: Eukaryotic initiation factor 4A-III, N-terminally processed]	0.0816362	13.6036	-0.184927	0.855049	0.998783	-5.65512
Q91VC9	Growth hormone-inducible transmembrane protein (Mitochondrial morphology and cristae structure 1) (MICS1)	0.0764734	12.811	-0.127659	0.899823	0.998783	-5.42978
Q91VD9	NADH-ubiquinone oxidoreductase 75 kDa subunit, mitochondrial (EC 7.1.1.2) (Complex I-75kD) (CI-75kD)	-0.762093	13.3972	1.39545	0.179354	0.998783	-4.81377
Q91VI7	Ribonuclease inhibitor (Ribonuclease/angiogenin inhibitor 1)	0.0410472	12.7317	-0.0776411	0.93892	0.998783	-5.48632
Q91VM9	Inorganic pyrophosphatase 2, mitochondrial (EC 3.6.1.1) (Pyrophosphate phospho-hydrolase 2) (PPase 2)	-0.3645	11.4167	0.705936	0.489198	0.998783	-5.23039
Q91VR2	ATP synthase subunit gamma, mitochondrial (ATP synthase F1 subunit gamma) (F-ATPase gamma subunit)	-0.518761	15.2459	1.04416	0.30821	0.998783	-5.18044
Q91W90	Thioredoxin domain-containing protein 5 (EC 1.8.4.-) (EC 5.3.4.1) (Endoplasmic reticulum resident protein 46) (ER protein 46) (ERp46) (Plasma cell-specific thioredoxin-related protein) (PC-TRP) (Thioredoxin-like protein p46)	-0.223916	11.3798	0.475593	0.639748	0.998783	-5.44555
Q91WD5	NADH dehydrogenase [ubiquinone] iron-sulfur protein 2, mitochondrial (EC 7.1.1.2) (Complex I-49kD) (CI-49kD) (NADH-ubiquinone oxidoreductase 49 kDa subunit)	-0.312187	13.2691	0.691345	0.496873	0.998783	-5.4525
Q91WG0	Acylcarnitine hydrolase (ACH M1) (EC 3.1.1.28) (Carboxylesterase 2) (CES 2) (Carboxylic ester hydrolase) (EC 3.1.1.-) (Peroxisome proliferator-inducible acylcarnitine hydrolase)	-0.226274	17.6897	0.441594	0.663268	0.998783	-5.58115
Q91WG8	Bifunctional UDP-N-acetylglucosamine 2-epimerase/N-acetylmannosamine kinase (UDP-GlcNAc-2-epimerase/ManAc kinase) [Includes: UDP-N-acetylglucosamine 2-epimerase (hydrolyzing) (EC 3.2.1.183) (UDP-GlcNAc-2-epimerase) (Uridine diphosphate-N-acetylglucosamine-2-epimerase); N-acetylmannosamine kinase (EC 2.7.1.60) (ManAc kinase)]	0.149471	12.5814	-0.255318	0.801351	0.998783	-5.41316
Q91WL0	Epidermal growth factor receptor kinase substrate 8-like protein 3 (EPS8-like protein 3) (Epidermal growth factor receptor pathway substrate 8-related protein 3) (EPS8-related protein 3)	0.52406	14.5873	-1.00052	0.328529	0.998783	-5.21944
Q91WP6	Serine protease inhibitor A3N (Serpin A3N)	0.567536	14.8459	-1.2685	0.218414	0.998783	-4.95641
Q91WQ9	Calmodulin-like protein 4 (Calmodulin-related) (CALM-Rel)	0.102289	12.7916	-0.199188	0.844217	0.998783	-5.52837
Q91WS0	CDGSH iron-sulfur domain-containing protein 1 (Cysteine transaminase CISD1) (EC 2.6.1.3) (MitoNEET)	0.548079	12.7517	-0.705137	0.4902	0.998783	-5.04143
Q91WS2	NACHT, LRR and PYD domains-containing protein 6 (Angiotensin II/vasopressin receptor) (Non-angiotensin-vasopressin receptor) (Non-AVR) (PYRIN-containing APAF1-like protein 5-like)	-0.0985867	12.3937	0.204289	0.840285	0.998783	-5.52745
Q91WU0	Carboxylesterase 1F (EC 3.1.1.1) (Carboxylic ester hydrolase) (Triacylglycerol hydrolase 2) (TGH-2)	0.109908	13.6012	-0.20498	0.839646	0.998783	-5.56918
Q91WV7	Neutral and basic amino acid transport protein rBAT (Solute carrier family 3 member 1) (b(0,+)-type amino acid transport protein) (NBAT)	0.292243	17.0303	-0.561091	0.580636	0.998783	-5.52644
Q91X17	Uromodulin (Tamm-Horsfall urinary glycoprotein) (THP) [Cleaved into: Uromodulin, secreted form]	-0.588315	13.1887	0.937138	0.363068	0.998783	-5.27043
Q91X72	Hemopexin	0.26732	13.1008	-0.597783	0.556337	0.998783	-5.50711
Q91X78	Erlin-1 (Endoplasmic reticulum lipid raft-associated protein 1) (Protein KE04 homolog) (Stomatin-prohibitin-flotillin-HflC/K domain-containing protein 1) (SPFH domain-containing protein 1)	-0.443222	11.8751	0.790341	0.439542	0.998783	-5.17766
Q91X79	Chymotrypsin-like elastase family member 1 (EC 3.4.21.36) (Elastase-1)	-0.854804	20.3035	1.24397	0.229565	0.998783	-4.9819
Q91X79;Q9CQ52		-0.650796	16.7719	0.823593	0.422476	0.998783	-5.15062
Q91XA2	Golgi membrane protein 1 (Golgi membrane protein GP73) (Golgi phosphoprotein 2)	0.175282	11.8703	-0.299738	0.767934	0.998783	-5.40252
Q91XA9	Acidic mammalian chitinase (AMCase) (EC 3.2.1.14) (YNL)	0.721011	20.2236	-1.22985	0.232269	0.998783	-4.99767
Q91XE4	N-acyl-aromatic-L-amino acid amidohydrolase (carboxylate-forming) (EC 3.5.1.114) (Acylase III) (Aminoacylase III) (AAIII) (Aminoacylase-3) (ACY-3) (Aspartoacylase-2) (Hepatitis C virus core-binding protein 1) (HCBP1)	-0.240259	12.8737	0.499081	0.623131	0.998783	-5.48178
Q91Y74	CMP-N-acetylneuraminate-beta-galactosamide-alpha-2,3-sialyltransferase 4 (Alpha 2,3-ST 4) (Beta-galactoside alpha-2,3-sialyltransferase 4) (EC 2.4.3.2) (EC 2.4.3.4) (Alpha 2,3-sialyltransferase IV) (Gal-beta-1,3-GalNAc-alpha-2,3-sialyltransferase) (Gal-beta-1,4-GlcNAc-alpha-2,3-sialyltransferase) (N-acetyllactosaminide alpha-2,3-sialyltransferase) (EC 2.4.3.6) (ST3Gal IV) (ST3GalIV) (Sialyltransf…	-0.783006	11.113	0.94963	0.356309	0.998783	-4.82505
Q91Y97	Fructose-bisphosphate aldolase B (EC 4.1.2.13) (Aldolase 2) (Liver-type aldolase)	-0.0137698	14.1944	0.031328	0.975302	0.998783	-5.67048
Q91YL7	PGAP2-interacting protein (Cell wall biogenesis protein 43 C-terminal homolog)	-0.288195	11.1304	0.508983	0.617256	0.998783	-5.27182
Q91YQ5	Dolichyl-diphosphooligosaccharide--protein glycosyltransferase subunit 1 (Dolichyl-diphosphooligosaccharide--protein glycosyltransferase 67 kDa subunit) (Ribophorin I) (RPN-I) (Ribophorin-1)	-0.462491	13.4071	0.91243	0.371833	0.998783	-5.29392
Q91YR1	Twinfilin-1 (Protein A6)	0.05727	11.8244	-0.120957	0.904986	0.998783	-5.53956
Q91YT0	NADH dehydrogenase [ubiquinone] flavoprotein 1, mitochondrial (EC 7.1.1.2) (Complex I-51kD) (CI-51kD) (NADH-ubiquinone oxidoreductase 51 kDa subunit)	-0.502259	14.3168	1.00669	0.325471	0.998783	-5.21412
Q91ZA3	Propionyl-CoA carboxylase alpha chain, mitochondrial (PCCase subunit alpha) (EC 6.4.1.3) (Propanoyl-CoA:carbon dioxide ligase subunit alpha)	-0.0215102	12.2698	0.0385923	0.969637	0.998783	-5.44052
Q91ZE0	Trimethyllysine dioxygenase, mitochondrial (EC 1.14.11.8) (Epsilon-trimethyllysine 2-oxoglutarate dioxygenase) (TML hydroxylase) (TML-alpha-ketoglutarate dioxygenase) (TML dioxygenase) (TMLD)	-0.629798	11.4525	1.16225	0.2602	0.998783	-4.88088
Q91ZJ5	UTP--glucose-1-phosphate uridylyltransferase (EC 2.7.7.9) (UDP-glucose pyrophosphorylase) (UDPGP) (UGPase)	0.0578419	12.7044	-0.0997698	0.921741	0.998783	-5.58363
Q91ZX7	Prolow-density lipoprotein receptor-related protein 1 (LRP-1) (Alpha-2-macroglobulin receptor) (A2MR) (CD antigen CD91) [Cleaved into: Low-density lipoprotein receptor-related protein 1 85 kDa subunit (LRP-85); Low-density lipoprotein receptor-related protein 1 515 kDa subunit (LRP-515); Low-density lipoprotein receptor-related protein 1 intracellular domain (LRPICD)]	0.145474	14.277	-0.332419	0.742847	0.998783	-5.61994
Q921G7	Electron transfer flavoprotein-ubiquinone oxidoreductase, mitochondrial (ETF-QO) (ETF-ubiquinone oxidoreductase) (EC 1.5.5.1) (Electron-transferring-flavoprotein dehydrogenase) (ETF dehydrogenase)	-0.156338	14.017	0.299886	0.767411	0.998783	-5.62928
Q921H8	3-ketoacyl-CoA thiolase A, peroxisomal (EC 2.3.1.16) (Acetyl-CoA C-myristoyltransferase) (EC 2.3.1.155) (Acetyl-CoA acyltransferase A) (EC 2.3.1.9) (Beta-ketothiolase A) (Peroxisomal 3-oxoacyl-CoA thiolase A)	0.614691	11.0407	-0.980346	0.344498	0.998783	-5.03675
Q921I1	Serotransferrin (Transferrin) (Beta-1 metal-binding globulin) (Siderophilin)	-0.278417	15.6671	0.514234	0.612424	0.998783	-5.54941
Q921M3	Splicing factor 3B subunit 3 (Pre-mRNA-splicing factor SF3b 130 kDa subunit) (SF3b130) (Spliceosome-associated protein 130) (SAP 130)	-0.229457	12.1754	0.265796	0.793763	0.998783	-5.10292
Q922B2	Aspartate--tRNA ligase, cytoplasmic (EC 6.1.1.12) (Aspartyl-tRNA synthetase) (AspRS)	-0.142607	13.0258	0.150455	0.882271	0.998783	-5.12099
Q922D8	C-1-tetrahydrofolate synthase, cytoplasmic (C1-THF synthase) [Cleaved into: C-1-tetrahydrofolate synthase, cytoplasmic, N-terminally processed] [Includes: Methylenetetrahydrofolate dehydrogenase (EC 1.5.1.5); Methenyltetrahydrofolate cyclohydrolase (EC 3.5.4.9); Formyltetrahydrofolate synthetase (EC 6.3.4.3)]	0.886402	12.0875	-1.03257	0.317037	0.998783	-4.77226
Q922K9	Tyrosine-protein kinase FRK (EC 2.7.10.2) (Beta-cell Src-homology tyrosine kinase) (BSK) (FYN-related kinase) (Intestine tyrosine kinase)	0.214772	13.2787	-0.222337	0.826842	0.998783	-5.11026
Q922Q1	Mitochondrial amidoxime reducing component 2 (mARC2) (EC 1.7.-.-) (Molybdenum cofactor sulfurase C-terminal domain-containing protein 2) (MOSC domain-containing protein 2) (Moco sulfurase C-terminal domain-containing protein 2)	-0.244402	12.9096	0.391937	0.699673	0.998783	-5.37537
Q922Q8	Leucine-rich repeat-containing protein 59 [Cleaved into: Leucine-rich repeat-containing protein 59, N-terminally processed]	-0.946532	13.5052	1.12359	0.276681	0.998783	-4.76906
Q922R8	Protein disulfide-isomerase A6 (EC 5.3.4.1) (Thioredoxin domain-containing protein 7)	0.205794	12.3904	-0.380606	0.707688	0.998783	-5.43287
Q922U2	Keratin, type II cytoskeletal 5 (Cytokeratin-5) (CK-5) (Keratin-5) (K5) (Type-II keratin Kb5)	-0.155408	14.5409	0.270425	0.790119	0.998783	-5.63678
Q922V4	Pleiotropic regulator 1	0.140936	12.2461	-0.236469	0.815873	0.998783	-5.35599
Q924M7	Mannose-6-phosphate isomerase (EC 5.3.1.8) (Phosphohexomutase) (Phosphomannose isomerase) (PMI)	0.46652	13.1332	-0.850344	0.405133	0.998783	-5.26729
Q93092	Transaldolase (EC 2.2.1.2)	-0.710722	13.3657	1.23182	0.235039	0.998783	-4.99431
Q99J47	Dehydrogenase/reductase SDR family member 7B (EC 1.1.-.-) (Short-chain dehydrogenase/reductase family 32C member 1) (Protein SDR32C1)	-0.0831289	13.1033	0.137571	0.892095	0.998783	-5.43302
Q99J77	Sialic acid synthase (N-acetylneuraminate-9-phosphate synthase) (EC 2.5.1.57) (N-acetylneuraminic acid phosphate synthase)	0.257509	12.2883	-0.506693	0.618159	0.998783	-5.43207
Q99JG3	Annexin A13 (Annexin XIII) (Annexin-13)	0.99927	15.5436	-2.05496	0.0524517	0.998783	-3.90913
Q99JW2	Aminoacylase-1 (ACY-1) (EC 3.5.1.14) (N-acyl-L-amino-acid amidohydrolase)	0.25761	12.8925	-0.529611	0.602173	0.998783	-5.46509
Q99JW5	Epithelial cell adhesion molecule (Ep-CAM) (Epithelial glycoprotein 314) (EGP314) (mEGP314) (Protein 289A) (Tumor-associated calcium signal transducer 1) (CD antigen CD326)	0.195765	13.4869	-0.341541	0.736422	0.998783	-5.53541
Q99JY0	Trifunctional enzyme subunit beta, mitochondrial (TP-beta) [Includes: 3-ketoacyl-CoA thiolase (EC 2.3.1.155) (EC 2.3.1.16) (Acetyl-CoA acyltransferase) (Beta-ketothiolase)]	-0.417091	13.2317	0.672179	0.511256	0.998783	-5.46191
Q99JY8	Phospholipid phosphatase 3 (EC 3.1.3.-) (EC 3.1.3.4) (Lipid phosphate phosphohydrolase 3) (PAP2-beta) (Phosphatidate phosphohydrolase type 2b) (Phosphatidic acid phosphatase 2b) (PAP-2b) (PAP2b)	0.0495766	10.944	-0.0621473	0.951165	0.998783	-5.12692
Q99JY9	Actin-related protein 3 (Actin-like protein 3)	-0.297958	12.6078	0.570587	0.574593	0.998783	-5.4421
Q99JZ0	Syntenin-2 (Syndecan-binding protein 2)	0.632318	13.7014	-1.14731	0.26661	0.998783	-5.0807
Q99K01	Pyridoxal-dependent decarboxylase domain-containing protein 1 (EC 4.1.1.-)	0.535247	11.806	-0.631804	0.536365	0.998783	-4.99207
Q99K30	Epidermal growth factor receptor kinase substrate 8-like protein 2 (EPS8-like protein 2) (Epidermal growth factor receptor pathway substrate 8-related protein 2) (EPS8-related protein 2)	-0.0553807	14.0524	0.126533	0.900506	0.998783	-5.66353
Q99KB8	Hydroxyacylglutathione hydrolase, mitochondrial (EC 3.1.2.6) (Glyoxalase II) (Glx II)	0.448272	14.7736	-0.973623	0.341256	0.998783	-5.24292
Q99KC8	von Willebrand factor A domain-containing protein 5A (Loss of heterozygosity 11 chromosomal region 2 gene A protein homolog)	0.273209	11.9599	-0.513397	0.613872	0.998783	-5.32868
Q99KE1	NAD-dependent malic enzyme, mitochondrial (NAD-ME) (EC 1.1.1.38) (Malic enzyme 2)	-0.316921	12.1925	0.643052	0.527822	0.998783	-5.36328
Q99KF1	Transmembrane emp24 domain-containing protein 9 (Glycoprotein 25L2) (p24 family protein alpha-2) (p24alpha2)	-0.585828	12.9517	1.17162	0.255027	0.998783	-4.98965
Q99KG5	Lipolysis-stimulated lipoprotein receptor (Angulin-3) (Lipolysis-stimulated receptor) (Liver-specific bHLH-Zip transcription factor) (Liver-specific gene on mouse chromosome 7 protein)	0.416105	11.906	-0.931484	0.362122	0.998783	-5.27837
Q99KI0	Aconitate hydratase, mitochondrial (Aconitase) (EC 4.2.1.3) (Citrate hydro-lyase)	-0.476863	14.6856	0.873912	0.392929	0.998783	-5.32361
Q99KK2	N-acylneuraminate cytidylyltransferase (EC 2.7.7.43) (CMP-N-acetylneuraminic acid synthase) (CMP-NeuNAc synthase)	0.0877123	12.8395	-0.172763	0.864652	0.998783	-5.53276
Q99KK7	Dipeptidyl peptidase 3 (EC 3.4.14.4) (Dipeptidyl aminopeptidase III) (Dipeptidyl arylamidase III) (Dipeptidyl peptidase III) (DPP III) (Enkephalinase B)	0.457956	11.3767	-0.897496	0.380608	0.998783	-5.15077
Q99KN1	Arrestin domain-containing protein 1 (Alpha-arrestin 1)	0.893922	11.8763	-1.50864	0.149607	0.998783	-4.49604
Q99KN2	Probable cytosolic iron-sulfur protein assembly protein CIAO1 (WD repeat-containing protein 39)	0.974717	12.0587	-1.29907	0.211129	0.998783	-4.62327
Q99KP3	Lambda-crystallin homolog (EC 1.1.1.45) (L-gulonate 3-dehydrogenase) (Gul3DH)	-0.286933	13.5408	0.604809	0.551745	0.998783	-5.50327
Q99KQ4	Nicotinamide phosphoribosyltransferase (NAmPRTase) (Nampt) (EC 2.4.2.12) (Pre-B-cell colony-enhancing factor 1 homolog) (PBEF) (Visfatin)	0.34034	11.1262	-0.412568	0.685353	0.998783	-5.06863
Q99KR7	Peptidyl-prolyl cis-trans isomerase F, mitochondrial (PPIase F) (EC 5.2.1.8) (Cyclophilin D) (CyP-D) (CypD) (Cyclophilin F) (Rotamase F)	-0.287614	12.9565	0.310839	0.759673	0.998783	-5.09405
Q99KR8	Plasma alpha-L-fucosidase (EC 3.2.1.51) (Alpha-L-fucoside fucohydrolase 2) (Alpha-L-fucosidase 2)	-1.08804	12.1068	1.30354	0.209634	0.998783	-4.57532
Q99KV1	DnaJ homolog subfamily B member 11 (APOBEC1-binding protein 2) (ABBP-2) (ER-associated DNAJ) (ER-associated Hsp40 co-chaperone) (Endoplasmic reticulum DNA J domain-containing protein 3) (ER-resident protein ERdj3) (ERdj3) (ERj3p)	-0.815084	11.8966	1.52164	0.145346	0.998783	-4.51388
Q99L13	3-hydroxyisobutyrate dehydrogenase, mitochondrial (HIBADH) (EC 1.1.1.31)	0.436825	11.7366	-0.82636	0.41934	0.998783	-5.15362
Q99LB2	Dehydrogenase/reductase SDR family member 4 (EC 1.1.1.184) (EC 1.1.1.300) (NADPH-dependent carbonyl reductase) (CR) (NADPH-dependent retinol dehydrogenase/reductase) (NDRD) (mouNRDR) (Peroxisomal short-chain alcohol dehydrogenase) (PSCD) (Short chain dehydrogenase/reductase family 25C member 2) (Protein SDR25C2)	-0.537932	12.2924	1.04986	0.306864	0.998783	-5.02173
Q99LC3	NADH dehydrogenase [ubiquinone] 1 alpha subcomplex subunit 10, mitochondrial (Complex I-42kD) (CI-42kD) (NADH-ubiquinone oxidoreductase 42 kDa subunit)	0.3201	12.8011	-0.556734	0.584515	0.998783	-5.30908
Q99LC5	Electron transfer flavoprotein subunit alpha, mitochondrial (Alpha-ETF)	-0.417108	13.5938	0.53657	0.601876	0.998783	-5.53448
Q99LF4	RNA-splicing ligase RtcB homolog (EC 6.5.1.8) (3'-phosphate/5'-hydroxy nucleic acid ligase) (Focal adhesion-associated protein) (FAAP)	0.510109	12.2568	-0.586959	0.565354	0.998783	-5.00927
Q99LJ1	Tissue alpha-L-fucosidase (EC 3.2.1.51) (Alpha-L-fucosidase I) (Alpha-L-fucoside fucohydrolase 1) (Alpha-L-fucosidase 1)	-0.409555	13.2937	0.884754	0.386244	0.998783	-5.31599
Q99LP6	GrpE protein homolog 1, mitochondrial (Mt-GrpE#1)	-0.514875	11.922	0.605177	0.553479	0.998783	-5.00319
Q99LU0	Charged multivesicular body protein 1B1 (Chromatin-modifying protein 1b-1) (CHMP1b-1)	0.453072	12.5304	-0.716179	0.483528	0.998783	-5.1683
Q99LX0	Parkinson disease protein 7 homolog (Maillard deglycase) (Parkinsonism-associated deglycase) (Protein DJ-1) (DJ-1) (Protein/nucleic acid deglycase DJ-1) (EC 3.1.2.-, EC 3.5.1.-, EC 3.5.1.124)	1.00495	12.4799	-1.33637	0.198903	0.998783	-4.59108
Q99LY2	Lysophospholipase D GDPD3 (EC 3.1.4.-) (Glycerophosphodiester phosphodiesterase 7) (Glycerophosphodiester phosphodiesterase domain-containing protein 3)	2.09551	12.241	-0.242633	0.811347	0.998783	-4.60403
Q99M74	Keratin, type II cuticular Hb2 (Keratin-82) (K82) (Type II hair keratin Hb2) (Type-II keratin Kb22)	0.203813	13.2894	-0.246789	0.808004	0.998783	-5.20407
Q99MN9	Propionyl-CoA carboxylase beta chain, mitochondrial (PCCase subunit beta) (EC 6.4.1.3) (Propanoyl-CoA:carbon dioxide ligase subunit beta)	0.105824	12.1395	-0.19643	0.846458	0.998783	-5.42457
Q99MR8	Methylcrotonoyl-CoA carboxylase subunit alpha, mitochondrial (MCCase subunit alpha) (EC 6.4.1.4) (3-methylcrotonyl-CoA carboxylase 1) (3-methylcrotonyl-CoA carboxylase biotin-containing subunit) (3-methylcrotonyl-CoA:carbon dioxide ligase subunit alpha)	0.124795	11.3842	-0.241255	0.812064	0.998783	-5.41615
Q99MZ6	Unconventional myosin-VIIb	0.510023	14.0716	-1.03884	0.310618	0.998783	-5.18529
Q99NB1	Acetyl-coenzyme A synthetase 2-like, mitochondrial (EC 6.2.1.1) (Acetate--CoA ligase 2) (Acetyl-CoA synthetase 2) (AceCS2) (Acyl-CoA synthetase short-chain family member 1) (Propionate--CoA ligase) (EC 6.2.1.17)	-0.334808	12.2755	0.560127	0.582643	0.998783	-5.24937
Q99P58	Ras-related protein Rab-27B (EC 3.6.5.2)	0.276157	11.2505	-0.480341	0.63706	0.998783	-5.28349
Q99P86	Resistin-like beta (Cysteine-rich secreted protein A12-beta) (Cysteine-rich secreted protein FIZZ2) (RELMbeta)	0.002088	16.9134	-0.00365179	0.997121	0.998783	-5.67093
Q99PG0	Arylacetamide deacetylase (EC 3.1.1.3)	0.130064	11.5885	-0.22082	0.827983	0.998783	-5.42008
Q99PT1	Rho GDP-dissociation inhibitor 1 (Rho GDI 1) (GDI-1) (Rho-GDI alpha)	-0.254556	16.3886	0.446313	0.659911	0.998783	-5.57923
Q9CPQ1	Cytochrome c oxidase subunit 6C (Cytochrome c oxidase polypeptide VIc)	-0.619615	15.6731	1.13585	0.268734	0.998783	-5.09344
Q9CPQ8	ATP synthase subunit g, mitochondrial (ATPase subunit g) (ATP synthase membrane subunit g)	-0.476616	14.2165	0.79437	0.437253	0.998783	-5.17502
Q9CPU0	Lactoylglutathione lyase (EC 4.4.1.5) (Aldoketomutase) (Glyoxalase I) (Glx I) (Ketone-aldehyde mutase) (Methylglyoxalase) (S-D-lactoylglutathione methylglyoxal lyase)	-0.322281	13.6703	0.685533	0.500459	0.998783	-5.45611
Q9CPU4	Microsomal glutathione S-transferase 3 (Microsomal GST-3) (Glutathione peroxidase MGST3) (EC 1.11.1.-) (Microsomal glutathione S-transferase III) (Microsomal GST-III)	0.204297	13.6141	-0.336243	0.741099	0.998783	-5.61803
Q9CPV4	Glyoxalase domain-containing protein 4	-0.106478	11.6701	0.149783	0.882685	0.998783	-5.21821
Q9CPY7	Cytosol aminopeptidase (EC 3.4.11.1) (Cysteinylglycine-S-conjugate dipeptidase) (EC 3.4.13.23) (Leucine aminopeptidase 3) (LAP-3) (Leucyl aminopeptidase) (Peptidase S) (Proline aminopeptidase) (EC 3.4.11.5) (Prolyl aminopeptidase)	0.376242	18.2632	-0.714024	0.483024	0.998783	-5.43813
Q9CQ52	Chymotrypsin-like elastase family member 3B (EC 3.4.21.70) (Elastase IIIB) (Elastase-3B) (Protease E)	0.399387	20.21	-0.608636	0.549731	0.998783	-5.50072
Q9CQ62	2,4-dienoyl-CoA reductase [(3E)-enoyl-CoA-producing], mitochondrial (EC 1.3.1.124) (2,4-dienoyl-CoA reductase [NADPH]) (4-enoyl-CoA reductase [NADPH])	0.666219	12.5375	-1.13455	0.27134	0.998783	-4.90932
Q9CQ75	NADH dehydrogenase [ubiquinone] 1 alpha subcomplex subunit 2 (Complex I-B8) (CI-B8) (NADH-ubiquinone oxidoreductase B8 subunit)	-0.341483	12.592	0.597807	0.557361	0.998783	-5.28911
Q9CQA3	Succinate dehydrogenase [ubiquinone] iron-sulfur subunit, mitochondrial (EC 1.3.5.1) (Iron-sulfur subunit of complex II) (Ip)	-0.704628	15.1848	1.37264	0.184256	0.998783	-4.83997
Q9CQB5	CDGSH iron-sulfur domain-containing protein 2 (MitoNEET-related 1 protein) (Miner1) (Nervous system overexpressed protein 70)	-0.164479	11.6256	0.195818	0.847197	0.998783	-5.11553
Q9CQC2	Colipase	-0.0451063	20.4401	0.0629516	0.95055	0.998783	-5.66908
Q9CQE1	Protein NipSnap homolog 3B (NipSnap3B) (NipSnap-related protein) (Protein NipSnap homolog 3A) (NipSnap3A)	-0.0923699	12.9624	0.171872	0.865342	0.998783	-5.47603
Q9CQF9	Prenylcysteine oxidase 1 (EC 1.8.3.5) (Prenylcysteine lyase)	0.115864	12.7509	-0.224286	0.824912	0.998783	-5.52362
Q9CQH0	PDZK1-interacting protein 1 (17 kDa membrane-associated protein)	0.185237	12.2321	-0.213647	0.833499	0.998783	-5.11158
Q9CQH3	NADH dehydrogenase [ubiquinone] 1 beta subcomplex subunit 5, mitochondrial (Complex I-SGDH) (CI-SGDH) (NADH-ubiquinone oxidoreductase SGDH subunit)	-0.893162	13.322	1.96511	0.0626811	0.998783	-4.04638
Q9CQJ8	NADH dehydrogenase [ubiquinone] 1 beta subcomplex subunit 9 (Complex I-B22) (CI-B22) (NADH-ubiquinone oxidoreductase B22 subunit)	0.115978	12.8678	-0.198095	0.845174	0.998783	-5.42429
Q9CQM5	Thioredoxin domain-containing protein 17 (14 kDa thioredoxin-related protein) (TRP14) (Protein 42-9-9) (Thioredoxin-like protein 5)	0.211932	11.3369	-0.385505	0.704348	0.998783	-5.3775
Q9CQN1	Heat shock protein 75 kDa, mitochondrial (HSP 75) (TNFR-associated protein 1) (Tumor necrosis factor type 1 receptor-associated protein) (TRAP-1)	0.0201305	14.4769	-0.0444063	0.964997	0.998783	-5.67002
Q9CQQ7	ATP synthase F(0) complex subunit B1, mitochondrial (ATP synthase peripheral stalk-membrane subunit b) (ATP synthase subunit b) (ATPase subunit b)	-0.86215	14.197	1.10637	0.291361	0.998783	-5.11553
Q9CQR2	40S ribosomal protein S21	0.271013	13.3081	-0.45154	0.656954	0.998783	-5.35398
Q9CQV3	Serpin B11	0.592061	13.3444	-1.3783	0.182527	0.998783	-4.83342
Q9CQV8	14-3-3 protein beta/alpha (Protein kinase C inhibitor protein 1) (KCIP-1) [Cleaved into: 14-3-3 protein beta/alpha, N-terminally processed]	-1.0451	13.0508	1.64233	0.121675	0.998783	-4.43569
Q9CQW2	ADP-ribosylation factor-like protein 8B (EC 3.6.5.2) (ADP-ribosylation factor-like protein 10C) (Novel small G protein indispensable for equal chromosome segregation 1)	-0.0795486	14.0237	0.133716	0.8951	0.998783	-5.43347
Q9CQW5	Galectin-2 (Gal-2)	0.670616	12.9165	-1.50938	0.146009	0.998783	-4.67583
Q9CQX2	Cytochrome b5 type B (Cytochrome b5 outer mitochondrial membrane isoform)	-0.704101	13.0655	1.48754	0.151641	0.998783	-4.70287
Q9CQY5	Magnesium transporter protein 1 (MagT1) (Dolichyl-diphosphooligosaccharide--protein glycosyltransferase subunit MAGT1) (Oligosaccharyl transferase subunit MAGT1) (Implantation-associated protein) (IAP)	-0.50715	13.135	0.840221	0.411725	0.998783	-5.14411
Q9CQY8	Transmembrane 4 L6 family member 20	-0.0783262	12.6954	0.166925	0.869094	0.998783	-5.57558
Q9CQZ6	NADH dehydrogenase [ubiquinone] 1 beta subcomplex subunit 3 (Complex I-B12) (CI-B12) (NADH-ubiquinone oxidoreductase B12 subunit)	-0.92146	13.8664	1.33557	0.202632	0.998783	-4.74776
Q9CR26	Vacuolar protein sorting-associated protein VTA1 homolog (SKD1-binding protein 1) (SBP1)	-0.557452	10.7756	0.680328	0.505943	0.998783	-4.96946
Q9CR35	Chymotrypsinogen B (EC 3.4.21.1) [Cleaved into: Chymotrypsin B chain A; Chymotrypsin B chain B; Chymotrypsin B chain C]	-0.837891	21.0774	1.20303	0.244518	0.998783	-5.02468
Q9CR57	60S ribosomal protein L14	0.203629	13.1471	-0.427207	0.67355	0.998783	-5.58688
Q9CR61	NADH dehydrogenase [ubiquinone] 1 beta subcomplex subunit 7 (Complex I-B18) (CI-B18) (NADH-ubiquinone oxidoreductase B18 subunit)	-0.484712	13.9499	0.974462	0.34139	0.998783	-5.172
Q9CR62	Mitochondrial 2-oxoglutarate/malate carrier protein (OGCP) (alpha-oxoglutarate carrier) (Solute carrier family 25 member 11) (SLC25A11)	-0.131821	13.1104	0.279896	0.782279	0.998783	-5.63475
Q9CR68	Cytochrome b-c1 complex subunit Rieske, mitochondrial (EC 7.1.1.8) (Complex III subunit 5) (Cytochrome b-c1 complex subunit 5) (Rieske iron-sulfur protein) (RISP) (Rieske protein UQCRFS1) (Ubiquinol-cytochrome c reductase iron-sulfur subunit) [Cleaved into: Cytochrome b-c1 complex subunit 9 (Su9) (Subunit 9) (8 kDa subunit 9) (Complex III subunit IX) (Cytochrome b-c1 complex subunit 11) (UQCRFS1 …	0.470888	15.8558	-0.710989	0.487171	0.998783	-5.43786
Q9CRY7	Lysophospholipase D GDPD1 (EC 3.1.4.-) (Glycerophosphodiester phosphodiesterase 4) (Glycerophosphodiester phosphodiesterase domain-containing protein 1)	-0.263891	13.9795	0.516325	0.611061	0.998783	-5.54836
Q9CVB6	Actin-related protein 2/3 complex subunit 2 (Arp2/3 complex 34 kDa subunit) (p34-ARC)	-0.309929	12.8223	0.627227	0.537559	0.998783	-5.412
Q9CWJ9	Bifunctional purine biosynthesis protein ATIC (AICAR transformylase/inosine monophosphate cyclohydrolase) (ATIC) [Includes: Phosphoribosylaminoimidazolecarboxamide formyltransferase (EC 2.1.2.3) (5-aminoimidazole-4-carboxamide ribonucleotide formyltransferase) (AICAR formyltransferase) (AICAR transformylase); Inosine 5'-monophosphate cyclohydrolase (IMP cyclohydrolase) (EC 3.5.4.10) (IMP synthase…	0.0971139	12.5736	-0.17321	0.864553	0.998783	-5.58027
Q9CX00	IST1 homolog (Charged multivesicular body protein 8) (CHMP8)	-0.615832	12.6371	0.931458	0.367036	0.998783	-5.07586
Q9CXI5	Mesencephalic astrocyte-derived neurotrophic factor (Arginine-rich protein) (Protein ARMET)	-0.376801	12.3555	0.769482	0.451002	0.998783	-5.2857
Q9CXN7	Phenazine biosynthesis-like domain-containing protein 2 (EC 5.1.-.-)	-0.099165	12.8984	0.23649	0.815329	0.998783	-5.64509
Q9CXW4	60S ribosomal protein L11	0.0451518	12.6073	-0.0777097	0.93891	0.998783	-5.43856
Q9CY50	Translocon-associated protein subunit alpha (TRAP-alpha) (Signal sequence receptor subunit alpha) (SSR-alpha)	-0.748051	14.2488	1.64811	0.114117	0.998783	-4.49699
Q9CYA0	Protein disulfide isomerase Creld2 (EC 5.3.4.1) (Cysteine-rich with EGF-like domain protein 2)	-0.277709	12.3361	0.585298	0.564715	0.998783	-5.51366
Q9CYR0	Single-stranded DNA-binding protein, mitochondrial (Mt-SSB) (MtSSB)	-0.0245505	13.343	0.0540718	0.957386	0.998783	-5.66958
Q9CZ13	Cytochrome b-c1 complex subunit 1, mitochondrial (Complex III subunit 1) (Core protein I) (Ubiquinol-cytochrome-c reductase complex core protein 1)	-0.364589	15.3027	0.63119	0.535334	0.998783	-5.48787
Q9CZ30	Obg-like ATPase 1 (GTP-binding protein 9)	0.303434	14.4449	-0.423315	0.678566	0.998783	-5.41657
Q9CZ42	ATP-dependent (S)-NAD(P)H-hydrate dehydratase (EC 4.2.1.93) (ATP-dependent NAD(P)HX dehydratase) (Carbohydrate kinase domain-containing protein) (NAD(P)HX dehydratase)	-1.49254	10.2259	1.82082	0.0872303	0.998783	-4.11292
Q9CZM2	60S ribosomal protein L15	0.0688968	14.8991	-0.151094	0.881335	0.998783	-5.66037
Q9CZN7	Serine hydroxymethyltransferase, mitochondrial (SHMT) (EC 2.1.2.1) (Glycine hydroxymethyltransferase) (Serine methylase)	0.0384684	11.7746	-0.0703065	0.944719	0.998783	-5.43903
Q9CZS1	Aldehyde dehydrogenase X, mitochondrial (EC 1.2.1.3) (Aldehyde dehydrogenase family 1 member B1)	-0.08124	14.7585	0.172867	0.864401	0.998783	-5.65711
Q9CZU6	Citrate synthase, mitochondrial (EC 2.3.3.1) (Citrate (Si)-synthase)	-0.191914	16.4705	0.335226	0.740759	0.998783	-5.61908
Q9CZX8	40S ribosomal protein S19	-0.144521	13.8886	0.306857	0.762103	0.998783	-5.54566
Q9D023	Mitochondrial pyruvate carrier 2 (Brain protein 44)	0.030841	10.6571	-0.037642	0.970435	0.998783	-5.12693
Q9D051	Pyruvate dehydrogenase E1 component subunit beta, mitochondrial (PDHE1-B) (EC 1.2.4.1)	-0.0946363	13.2461	0.180244	0.858856	0.998783	-5.53158
Q9D0F9	Phosphoglucomutase-1 (PGM 1) (EC 5.4.2.2) (Glucose phosphomutase 1) (Phosphoglucomutase-2)	-0.378828	11.9927	0.763322	0.45458	0.998783	-5.28978
Q9D0K2	Succinyl-CoA:3-ketoacid coenzyme A transferase 1, mitochondrial (SCOT) (EC 2.8.3.5) (3-oxoacid CoA-transferase 1) (Somatic-type succinyl-CoA:3-oxoacid CoA-transferase) (SCOT-s) (Succinyl-CoA:3-oxoacid CoA transferase)	0.194663	13.1952	-0.303128	0.765893	0.998783	-5.54609
Q9D0M3	Cytochrome c1, heme protein, mitochondrial (EC 7.1.1.8) (Complex III subunit 4) (Complex III subunit IV) (Cytochrome b-c1 complex subunit 4) (Ubiquinol-cytochrome-c reductase complex cytochrome c1 subunit) (Cytochrome c-1)	-0.91374	14.1755	1.09542	0.288493	0.998783	-4.79077
Q9D0R2	Threonine--tRNA ligase 1, cytoplasmic (EC 6.1.1.3) (Threonine--tRNA ligase, cytoplasmic) (Threonyl-tRNA synthetase) (ThrRS) (Threonyl-tRNA synthetase 1)	-0.242719	11.7363	0.429602	0.672734	0.998783	-5.40823
Q9D154	Leukocyte elastase inhibitor A (Serine protease inhibitor EIA) (Serpin B1a)	-0.225043	17.4342	0.406941	0.688143	0.998783	-5.59463
Q9D154;Q9JK88		0.474461	12.3043	-0.845768	0.408704	0.998783	-5.14056
Q9D172	Glutamine amidotransferase-like class 1 domain-containing protein 3, mitochondrial	-0.238735	13.012	0.444751	0.661244	0.998783	-5.49911
Q9D1A2	Cytosolic non-specific dipeptidase (EC 3.4.13.18) (CNDP dipeptidase 2) (Glutamate carboxypeptidase-like protein 1) (Threonyl dipeptidase)	-0.265953	16.8486	0.511109	0.614573	0.998783	-5.55087
Q9D1D4	Transmembrane emp24 domain-containing protein 10 (Protein Tmed10) (21 kDa transmembrane-trafficking protein) (Transmembrane protein Tmp21) (p24 family protein delta-1) (p24delta1)	-0.680016	12.523	1.12077	0.277946	0.998783	-4.95799
Q9D1G1	Ras-related protein Rab-1B (EC 3.6.5.2)	-0.51382	12.585	0.672306	0.510354	0.998783	-5.05801
Q9D1Q6	Endoplasmic reticulum resident protein 44 (ER protein 44) (ERp44) (Thioredoxin domain-containing protein 4)	0.26344	12.3614	-0.48898	0.630414	0.998783	-5.39194
Q9D1R9	60S ribosomal protein L34	0.0226365	14.2468	-0.0453118	0.964305	0.998783	-5.58726
Q9D2G2	Dihydrolipoyllysine-residue succinyltransferase component of 2-oxoglutarate dehydrogenase complex, mitochondrial (EC 2.3.1.61) (2-oxoglutarate dehydrogenase complex component E2) (OGDC-E2) (Dihydrolipoamide succinyltransferase component of 2-oxoglutarate dehydrogenase complex) (E2K)	-0.115097	13.8646	0.262435	0.795527	0.998783	-5.63912
Q9D2Q8	Protein S100-A14 (S100 calcium-binding protein A14) (S114)	0.373724	10.4527	-0.531587	0.601836	0.998783	-5.12058
Q9D2Z1	Carcinoembryonic antigen-related cell adhesion molecule 20	0.111579	12.8947	-0.248971	0.805787	0.998783	-5.64229
Q9D309	Protein FAM3B (Cytokine-like protein 2-21) (Pancreatic-derived factor) (PANDER)	-0.47133	12.7139	0.800401	0.43384	0.998783	-5.17104
Q9D312	Keratin, type I cytoskeletal 20 (Cytokeratin-20) (CK-20) (Keratin-20) (K20)	0.528354	13.7637	-0.56227	0.587546	0.998783	-5.43971
Q9D3D9	ATP synthase subunit delta, mitochondrial (ATP synthase F1 subunit delta) (F-ATPase delta subunit)	-0.428748	14.6903	0.838686	0.411031	0.998783	-5.35134
Q9D3H2	Odorant-binding protein 1a (Odorant-binding protein IA)	-0.556658	17.8708	0.821169	0.423089	0.998783	-5.3621
Q9D687	Sodium-dependent neutral amino acid transporter B(0)AT1 (Solute carrier family 6 member 19) (System B(0) neutral amino acid transporter AT1)	1.00919	14.5214	-2.14222	0.0439749	0.998783	-3.77219
Q9D6J5	NADH dehydrogenase [ubiquinone] 1 beta subcomplex subunit 8, mitochondrial (Complex I-ASHI) (CI-ASHI) (NADH-ubiquinone oxidoreductase ASHI subunit)	0.00781521	12.7848	-0.00976061	0.992325	0.998783	-5.22668
Q9D6J6	NADH dehydrogenase [ubiquinone] flavoprotein 2, mitochondrial (EC 7.1.1.2) (NADH-ubiquinone oxidoreductase 24 kDa subunit)	-0.781791	13.4684	1.75075	0.094493	0.998783	-4.3572
Q9D6R2	Isocitrate dehydrogenase [NAD] subunit alpha, mitochondrial (EC 1.1.1.41) (Isocitric dehydrogenase subunit alpha) (NAD(+)-specific ICDH subunit alpha)	0.115146	13.5835	-0.187601	0.85357	0.998783	-5.65442
Q9D6U8	Protein FAM162A (E2-induced gene 5 protein homolog) (Growth and transformation-dependent protein) (HGTD-P)	0.186279	11.8022	-0.219915	0.828696	0.998783	-5.11206
Q9D6X5	Solute carrier family 52, riboflavin transporter, member 3 (Riboflavin transporter 2) (RFT2)	1.12624	10.7535	-2.0033	0.0612226	0.998783	-3.90331
Q9D733	Pancreatic secretory granule membrane major glycoprotein GP2 (Pancreatic zymogen granule membrane protein GP-2)	0.587738	21.0685	-0.971638	0.34222	0.998783	-5.24462
Q9D7B6	Isobutyryl-CoA dehydrogenase, mitochondrial (EC 1.3.8.-) (Acyl-CoA dehydrogenase family member 8) (ACAD-8)	0.794144	11.545	-1.21051	0.248922	0.998783	-4.79391
Q9D7L8	Transmembrane and immunoglobulin domain-containing protein 1	0.369142	16.2623	-0.730943	0.47284	0.998783	-5.42712
Q9D7N9	Adipocyte plasma membrane-associated protein (Protein DD16)	-0.158726	12.7515	0.322443	0.750441	0.998783	-5.54124
Q9D7P9	Serpin B12	-0.0685603	14.8968	0.14123	0.889026	0.998783	-5.66171
Q9D7S0	Ly6/PLAUR domain-containing protein 8	-0.16912	18.3484	0.288433	0.775825	0.998783	-5.63252
Q9D7T1	Rab15 effector protein	0.96246	12.3665	-1.70642	0.104997	0.998783	-4.29526
Q9D7Z6	Calcium-activated chloride channel regulator 1 (EC 3.4.-.-) (Calcium-activated chloride channel family member 3) (mCLCA3) (Protein gob-5)	0.342862	19.32	-0.656007	0.518898	0.998783	-5.47402
Q9D816	Cytochrome P450 2C55 (EC 1.14.14.1) (CYPIIC55)	-1.12299	16.1299	1.77672	0.0923336	0.998783	-4.32717
Q9D819	Inorganic pyrophosphatase (EC 3.6.1.1) (Pyrophosphate phospho-hydrolase) (PPase)	-0.253279	13.1883	0.457164	0.652448	0.998783	-5.4941
Q9D855	Cytochrome b-c1 complex subunit 7 (Complex III subunit 7) (Complex III subunit VII) (Ubiquinol-cytochrome c reductase complex 14 kDa protein)	-0.598167	13.0905	0.988139	0.337558	0.998783	-5.15574
Q9D869	Calcineurin B homologous protein 2 (Hepatocellular carcinoma-associated antigen 520 homolog)	0.125202	11.2234	-0.155503	0.878242	0.998783	-5.11905
Q9D871	Carcinoembryonic antigen-related cell adhesion molecule 18	0.741704	12.652	-1.56929	0.132163	0.998783	-4.54472
Q9D8B3	Charged multivesicular body protein 4b (Chromatin-modifying protein 4b) (CHMP4b)	-0.697618	12.3033	1.23877	0.233357	0.998783	-4.88845
Q9D8E6	60S ribosomal protein L4	-0.153485	13.1993	0.335996	0.740187	0.998783	-5.61884
Q9D8G5	Regenerating islet-derived protein 4 (REG-4)	0.14366	14.9178	-0.132023	0.897069	0.998783	-5.19575
Q9D8I3	Glyoxalase domain-containing protein 5	-0.177325	12.7503	0.359237	0.723351	0.998783	-5.48857
Q9D8N0	Elongation factor 1-gamma (EF-1-gamma) (eEF-1B gamma)	0.711409	12.1033	-1.20572	0.244312	0.998783	-4.79985
Q9D8V0	Minor histocompatibility antigen H13 (EC 3.4.23.-) (Presenilin-like protein 3) (Signal peptide peptidase)	-0.423169	12.5674	0.724973	0.47772	0.998783	-5.21874
Q9D8W7	OCIA domain-containing protein 2	0.201026	12.1995	-0.471011	0.642696	0.998783	-5.48835
Q9D8Y0	EF-hand domain-containing protein D2 (Swiprosin-1)	0.320225	12.3524	-0.543298	0.594904	0.998783	-5.45386
Q9D958	Signal peptidase complex subunit 1 (Microsomal signal peptidase 12 kDa subunit) (SPase 12 kDa subunit)	-1.44956	11.7773	1.71291	0.105875	0.998783	-4.21709
Q9DA03	Complex III assembly factor LYRM7 (LYR motif-containing protein 7)	2.36591	16.1093	-0.597437	0.62229	0.998783	-5.06529
Q9DAS9	Guanine nucleotide-binding protein G(I)/G(S)/G(O) subunit gamma-12	0.145727	12.1318	-0.266104	0.793161	0.998783	-5.41075
Q9DAX2	Phospholipid phosphatase 2 (EC 3.1.3.-) (EC 3.1.3.4) (Lipid phosphate phosphohydrolase 2) (PAP2-gamma) (PAP2-G) (Phosphatidate phosphohydrolase type 2c) (Phosphatidic acid phosphatase 2c) (PAP-2c) (PAP2c)	0.110751	14.6065	-0.236607	0.81524	0.998783	-5.64506
Q9DB05	Alpha-soluble NSF attachment protein (SNAP-alpha) (N-ethylmaleimide-sensitive factor attachment protein alpha)	0.777445	12.0134	-1.06632	0.301073	0.998783	-4.81269
Q9DB20	ATP synthase subunit O, mitochondrial (ATP synthase peripheral stalk subunit OSCP) (Oligomycin sensitivity conferral protein) (OSCP)	-0.0365057	13.955	0.0545117	0.957215	0.998783	-5.43987
Q9DB25	Dolichyl-phosphate beta-glucosyltransferase (DolP-glucosyltransferase) (EC 2.4.1.117) (Asparagine-linked glycosylation protein 5 homolog)	0.43732	11.3089	-0.626132	0.53948	0.998783	-5.08006
Q9DB34	Charged multivesicular body protein 2a (Chromatin-modifying protein 2a) (CHMP2a) (Vacuolar protein sorting-associated protein 2) (mVps2)	-0.286855	12.3293	0.581741	0.567532	0.998783	-5.39615
Q9DB77	Cytochrome b-c1 complex subunit 2, mitochondrial (Complex III subunit 2) (Core protein II) (Ubiquinol-cytochrome-c reductase complex core protein 2)	-0.429994	15.6245	0.751465	0.460659	0.998783	-5.41344
Q9DBG6	Dolichyl-diphosphooligosaccharide--protein glycosyltransferase subunit 2 (Dolichyl-diphosphooligosaccharide--protein glycosyltransferase 63 kDa subunit) (Ribophorin II) (RPN-II) (Ribophorin-2)	-0.381544	13.354	0.761033	0.455045	0.998783	-5.40694
Q9DBH5	Vesicular integral-membrane protein VIP36 (Lectin mannose-binding 2) (Vesicular integral-membrane protein 36) (VIP36)	-0.237425	12.5011	0.511877	0.614306	0.998783	-5.47041
Q9DBJ3	Brain-specific angiogenesis inhibitor 1-associated protein 2-like protein 1 (BAI1-associated protein 2-like protein 1) (Insulin receptor tyrosine kinase substrate)	-0.112892	12.4472	0.205483	0.839365	0.998783	-5.47049
Q9DBK0	Acetyl-coenzyme A thioesterase (EC 3.1.2.1) (Acyl-CoA thioester hydrolase 12) (Acyl-coenzyme A thioesterase 12) (Acyl-CoA thioesterase 12) (Cytoplasmic acetyl-CoA hydrolase 1) (CACH-1) (mCACH-1)	0.915356	12.359	-1.46715	0.158578	0.998783	-4.53966
Q9DBM2	Peroxisomal bifunctional enzyme (PBE) (PBFE) (L-peroxisomal bifunctional enzyme) (L-PBE) (Multifunctional enzyme 1) (MFE1) (Multifunctional protein 1) (MFP-1) [Includes: Enoyl-CoA hydratase/3,2-trans-enoyl-CoA isomerase (EC 4.2.1.17) (EC 5.3.3.8); 3-hydroxyacyl-CoA dehydrogenase (EC 1.1.1.35)]	0.644453	11.8146	-0.889231	0.386193	0.998783	-4.93519
Q9DBP0	Sodium-dependent phosphate transport protein 2B (Sodium-phosphate transport protein 2B) (Na(+)-dependent phosphate cotransporter 2B) (Sodium/phosphate cotransporter 2B) (Na(+)/Pi cotransporter 2B) (NaPi-2b) (Solute carrier family 34 member 2)	0.063973	14.7509	-0.134165	0.894541	0.998783	-5.66261
Q9DBP5	UMP-CMP kinase (EC 2.7.4.14) (Deoxycytidylate kinase) (CK) (dCMP kinase) (Nucleoside-diphosphate kinase) (EC 2.7.4.6) (Uridine monophosphate/cytidine monophosphate kinase) (UMP/CMP kinase) (UMP/CMPK)	-0.0660274	12.8318	0.121658	0.904376	0.998783	-5.58149
Q9DBS1	Transmembrane protein 43 (Protein LUMA)	-0.437383	12.8832	0.739045	0.469338	0.998783	-5.21017
Q9DBU0	Transmembrane 9 superfamily member 1	-0.116379	11.765	0.199527	0.844199	0.998783	-5.36271
Q9DBX3	Sushi domain-containing protein 2	0.173029	15.6316	-0.350327	0.72956	0.998783	-5.61432
Q9DC50	Peroxisomal carnitine O-octanoyltransferase (COT) (EC 2.3.1.137)	0.351445	13.0008	-0.781399	0.443234	0.998783	-5.39285
Q9DC51	Guanine nucleotide-binding protein G(i) subunit alpha-3 (G(i) alpha-3)	0.689092	12.3337	-1.30133	0.209322	0.998783	-4.85589
Q9DC69	NADH dehydrogenase [ubiquinone] 1 alpha subcomplex subunit 9, mitochondrial (Complex I-39kD) (CI-39kD) (NADH-ubiquinone oxidoreductase 39 kDa subunit)	0.158287	12.2288	-0.290488	0.774738	0.998783	-5.40494
Q9DC70	NADH dehydrogenase [ubiquinone] iron-sulfur protein 7, mitochondrial (EC 7.1.1.2) (Complex I-20kD) (CI-20kD) (NADH-ubiquinone oxidoreductase 20 kDa subunit)	-0.087126	12.7859	0.166078	0.869837	0.998783	-5.53377
Q9DCC4	Pyrroline-5-carboxylate reductase 3 (P5C reductase 3) (P5CR 3) (EC 1.5.1.2) (Pyrroline-5-carboxylate reductase-like protein)	-0.302885	12.9529	0.683425	0.501763	0.998783	-5.45742
Q9DCD0	6-phosphogluconate dehydrogenase, decarboxylating (EC 1.1.1.44)	0.597054	13.1319	-0.924117	0.370157	0.998783	-5.20739
Q9DCJ5	NADH dehydrogenase [ubiquinone] 1 alpha subcomplex subunit 8 (Complex I-19kD) (CI-19kD) (Complex I-PGIV) (CI-PGIV) (NADH-ubiquinone oxidoreductase 19 kDa subunit)	-0.697017	13.2448	1.41392	0.172663	0.998783	-4.73085
Q9DCM0	Persulfide dioxygenase ETHE1, mitochondrial (EC 1.13.11.18) (Ethylmalonic encephalopathy protein 1 homolog) (Hepatoma subtracted clone one protein) (Sulfur dioxygenase ETHE1)	-0.176387	14.4896	0.225794	0.825358	0.998783	-5.64649
Q9DCM2	Glutathione S-transferase kappa 1 (EC 2.5.1.18) (GST 13-13) (GST class-kappa) (GSTK1-1) (mGSTK1) (Glutathione S-transferase subunit 13)	-0.45012	12.7314	0.861329	0.399198	0.998783	-5.25912
Q9DCN2	NADH-cytochrome b5 reductase 3 (B5R) (Cytochrome b5 reductase) (EC 1.6.2.2) (Diaphorase-1)	0.0690869	12.5502	-0.0910177	0.928534	0.998783	-5.22357
Q9DCS9	NADH dehydrogenase [ubiquinone] 1 beta subcomplex subunit 10 (Complex I-PDSW) (CI-PDSW) (NADH-ubiquinone oxidoreductase PDSW subunit)	-0.472613	12.1791	0.841554	0.410998	0.998783	-5.14319
Q9DCT1	1,5-anhydro-D-fructose reductase (AF reductase) (EC 1.1.1.263) (Aldo-keto reductase family 1 member C-like protein 2) (Aldo-keto reductase family 1 member E1) (Aldo-keto reductase family 1 member E2)	0.028827	13.1058	-0.0301285	0.976334	0.998783	-5.12711
Q9DCT2	NADH dehydrogenase [ubiquinone] iron-sulfur protein 3, mitochondrial (EC 7.1.1.2) (Complex I-30kD) (CI-30kD) (NADH-ubiquinone oxidoreductase 30 kDa subunit)	-0.215532	13.4303	0.385686	0.703984	0.998783	-5.47982
Q9DCW4	Electron transfer flavoprotein subunit beta (Beta-ETF)	-0.292519	13.9553	0.385135	0.706995	0.998783	-5.51926
Q9DCX2	ATP synthase subunit d, mitochondrial (ATPase subunit d) (ATP synthase peripheral stalk subunit d)	0.0323613	13.6388	-0.0675266	0.946797	0.998783	-5.66882
Q9DD20	Thiol S-methyltransferase METTL7B (Methyltransferase-like protein 7B) (EC 2.1.1.9)	-0.150558	13.1025	0.231076	0.819842	0.998783	-5.41822
Q9EPK2	Protein XRP2	0.329931	12.3842	-0.543592	0.593725	0.998783	-5.25685
Q9EQ06	Estradiol 17-beta-dehydrogenase 11 (EC 1.1.1.62) (17-beta-hydroxysteroid dehydrogenase 11) (17-beta-HSD 11) (17bHSD11) (17betaHSD11) (17-beta-hydroxysteroid dehydrogenase XI) (17-beta-HSD XI) (17betaHSDXI) (Dehydrogenase/reductase SDR family member 8)	-1.01427	12.988	1.57377	0.136603	0.998783	-4.54508
Q9EQ20	Methylmalonate-semialdehyde dehydrogenase [acylating], mitochondrial (MMSDH) (Malonate-semialdehyde dehydrogenase [acylating]) (EC 1.2.1.18) (EC 1.2.1.27) (Aldehyde dehydrogenase family 6 member A1)	-0.610364	11.4724	0.731507	0.474961	0.998783	-4.9465
Q9EQH2	Endoplasmic reticulum aminopeptidase 1 (EC 3.4.11.-) (ARTS-1) (Adipocyte-derived leucine aminopeptidase) (A-LAP) (Aminopeptidase PILS) (Puromycin-insensitive leucyl-specific aminopeptidase) (PILS-AP) (VEGF-induced aminopeptidase)	0.0414485	13.3257	-0.090291	0.928906	0.998783	-5.66716
Q9EQH3	Vacuolar protein sorting-associated protein 35 (Maternal-embryonic 3) (Vesicle protein sorting 35)	-0.258574	12.4884	0.551261	0.58752	0.998783	-5.45175
Q9EQK5	Major vault protein (MVP)	0.555207	12.8463	-0.878814	0.390998	0.998783	-5.11688
Q9EQP2	EH domain-containing protein 4 (PAST homolog 2) (mPAST2)	-0.16426	11.9399	0.318887	0.753267	0.998783	-5.44455
Q9EQU5	Protein SET (Phosphatase 2A inhibitor I2PP2A) (I-2PP2A) (Template-activating factor I) (TAF-I)	0.222174	14.2884	-0.503179	0.620042	0.998783	-5.55454
Q9ERS2	NADH dehydrogenase [ubiquinone] 1 alpha subcomplex subunit 13 (Cell death regulatory protein GRIM-19) (Complex I-B16.6) (CI-B16.6) (Gene associated with retinoic and interferon-induced mortality 19 protein) (GRIM-19) (Gene associated with retinoic and IFN-induced mortality 19 protein) (NADH-ubiquinone oxidoreductase B16.6 subunit)	-0.109709	13.3183	0.210322	0.83553	0.998783	-5.56818
Q9ES64	Harmonin (PDZ domain-containing protein) (Usher syndrome type-1C protein homolog)	0.523177	12.1807	-1.14059	0.266799	0.998783	-5.08877
Q9ES88	Solute carrier family 13 member 2 (Na(+)/dicarboxylate cotransporter 1) (NaDC-1) (Renal sodium/dicarboxylate cotransporter)	0.245833	12.9175	-0.444452	0.661702	0.998783	-5.40294
Q9ESX5	H/ACA ribonucleoprotein complex subunit DKC1 (EC 5.4.99.-) (Dyskerin) (Nopp140-associated protein of 57 kDa) (Nucleolar protein NAP57) (Nucleolar protein family A member 4) (snoRNP protein DKC1)	0.357023	11.7763	-0.597149	0.558217	0.998783	-5.23184
Q9ET22	Dipeptidyl peptidase 2 (EC 3.4.14.2) (Dipeptidyl aminopeptidase II) (Dipeptidyl peptidase 7) (Dipeptidyl peptidase II) (DPP II) (Quiescent cell proline dipeptidase)	-0.109647	12.2806	0.256645	0.799935	0.998783	-5.6405
Q9ET30	Transmembrane 9 superfamily member 3	-0.293091	12.5467	0.611577	0.547661	0.998783	-5.42059
Q9JHC0	Glutathione peroxidase 2 (GPx-2) (GSHPx-2) (EC 1.11.1.9) (Glutathione peroxidase-gastrointestinal) (GPx-GI) (GSHPx-GI)	0.517728	11.63	-1.1778	0.251968	0.998783	-5.05151
Q9JHE3	Neutral ceramidase (N-CDase) (NCDase) (EC 3.5.1.-) (EC 3.5.1.23) (Acylsphingosine deacylase 2) (N-acylsphingosine amidohydrolase 2) [Cleaved into: Neutral ceramidase soluble form]	0.515988	18.9496	-0.949315	0.35319	0.998783	-5.26354
Q9JHI5	Isovaleryl-CoA dehydrogenase, mitochondrial (IVD) (EC 1.3.8.4) (Butyryl-CoA dehydrogenase) (EC 1.3.8.1)	-0.189355	13.4069	0.359132	0.723235	0.998783	-5.53297
Q9JHR7	Insulin-degrading enzyme (EC 3.4.24.56) (Insulin protease) (Insulinase) (Insulysin)	-0.714079	11.2196	1.01624	0.323652	0.998783	-4.84927
Q9JHS4	ATP-dependent Clp protease ATP-binding subunit clpX-like, mitochondrial	0.46426	12.3145	-0.627938	0.538324	0.998783	-5.07923
Q9JHU4	Cytoplasmic dynein 1 heavy chain 1 (Cytoplasmic dynein heavy chain 1) (Dynein heavy chain, cytosolic)	0.54811	12.3582	-0.741112	0.468662	0.998783	-5.02244
Q9JHU9	Inositol-3-phosphate synthase 1 (IPS 1) (EC 5.5.1.4) (Myo-inositol 1-phosphate synthase) (MI-1-P synthase) (MIP synthase)	0.592422	14.4678	-1.30432	0.20615	0.998783	-4.91722
Q9JHW2	Omega-amidase NIT2 (EC 3.5.1.3) (Nitrilase homolog 2)	0.764133	12.0258	-0.891467	0.385026	0.998783	-4.86022
Q9JI67	Beta-1,3-galactosyltransferase 5 (Beta-1,3-GalTase 5) (Beta3Gal-T5) (Beta3GalT5) (b3Gal-T5) (EC 2.4.1.-) (Beta-3-Gx-T5) (Stage-specific embryonic antigen 3 synthase) (SSEA-3 synthase) (UDP-Gal:beta-GlcNAc beta-1,3-galactosyltransferase 5) (UDP-galactose:beta-N-acetylglucosamine beta-1,3-galactosyltransferase 5)	-0.123765	12.6427	0.217006	0.830627	0.998783	-5.42092
Q9JI75	Ribosyldihydronicotinamide dehydrogenase [quinone] (EC 1.10.5.1) (NRH dehydrogenase [quinone] 2) (NRH:quinone oxidoreductase 2) (Quinone reductase 2) (QR2)	-0.16478	12.3232	0.192231	0.849821	0.998783	-5.11463
Q9JI91	Alpha-actinin-2 (Alpha-actinin skeletal muscle isoform 2) (F-actin cross-linking protein)	0.0927522	13.7669	-0.212741	0.833567	0.998783	-5.65001
Q9JII6	Aldo-keto reductase family 1 member A1 (EC 1.1.1.2) (EC 1.1.1.33) (EC 1.1.1.372) (EC 1.1.1.54) (Alcohol dehydrogenase [NADP(+)]) (Aldehyde reductase) (Glucuronate reductase) (EC 1.1.1.19) (Glucuronolactone reductase) (EC 1.1.1.20)	0.103854	12.9622	-0.176024	0.862226	0.998783	-5.42784
Q9JIL4	Na(+)/H(+) exchange regulatory cofactor NHE-RF3 (NHERF-3) (CFTR-associated protein of 70 kDa) (Na(+)/H(+) exchanger regulatory factor 3) (Na/Pi cotransporter C-terminal-associated protein 1) (NaPi-Cap1) (PDZ domain-containing protein 1) (Sodium-hydrogen exchanger regulatory factor 3)	0.236611	12.8302	-0.48114	0.635361	0.998783	-5.56445
Q9JIP7	Solute carrier family 15 member 1 (Intestinal H(+)/peptide cotransporter) (Oligopeptide transporter, small intestine isoform) (Peptide transporter 1) (Proton-coupled dipeptide cotransporter)	0.513238	15.4402	-1.02692	0.316067	0.998783	-5.19607
Q9JIQ8	Transmembrane protease serine 2 (EC 3.4.21.-) (Epitheliasin) (Plasmic transmembrane protein X) [Cleaved into: Transmembrane protease serine 2 non-catalytic chain; Transmembrane protease serine 2 catalytic chain]	-0.0856667	12.52	0.200667	0.842877	0.998783	-5.65232
Q9JIW9	Ras-related protein Ral-B (EC 3.6.5.2)	-0.948381	12.1503	1.32154	0.203695	0.998783	-4.60979
Q9JJ00	Phospholipid scramblase 1 (PL scramblase 1) (Ca(2+)-dependent phospholipid scramblase 1) (Mg(2+)-dependent nuclease) (EC 3.1.-.-) (Transplantability-associated protein 1) (NOR1) (TRA1)	-0.352007	16.1801	0.671892	0.508931	0.998783	-5.46448
Q9JJ06	Glycoprotein-N-acetylgalactosamine 3-beta-galactosyltransferase 1 (EC 2.4.1.122) (Core 1 O-glycan T-synthase) (T-syn) (Core 1 UDP-galactose:N-acetylgalactosamine-alpha-R beta 1,3-galactosyltransferase 1) (Core 1 beta1,3-galactosyltransferase 1) (C1GalT1) (Core 1 beta3-Gal-T1)	-0.0620055	12.0923	0.111791	0.912217	0.998783	-5.43578
Q9JJF9	Signal peptide peptidase-like 2A (SPP-like 2A) (SPPL2a) (EC 3.4.23.-) (Intramembrane protease 3) (IMP-3) (Presenilin-like protein 2)	-0.357239	14.1683	0.424071	0.676501	0.998783	-5.1588
Q9JJX6	P2X purinoceptor 4 (P2X4) (ATP receptor) (Purinergic receptor)	-0.337116	12.0691	0.730589	0.473881	0.998783	-5.31096
Q9JK81	MYG1 exonuclease (EC 3.1.-.-) (Protein Gamm1)	-0.101321	12.2441	0.197537	0.845491	0.998783	-5.47911
Q9JK88	Serpin I2 (Serine protease inhibitor 14)	0.683722	15.3288	-1.44868	0.162102	0.998783	-4.75022
Q9JKA5	Cell surface A33 antigen (Glycoprotein A33) (mA33)	0.0832175	17.0316	-0.161942	0.87289	0.998783	-5.6588
Q9JKF1	Ras GTPase-activating-like protein IQGAP1	-0.162809	12.2508	0.333604	0.742306	0.998783	-5.49646
Q9JKN1	Zinc transporter 7 (ZnT-7) (Solute carrier family 30 member 7) (Znt-like transporter 2)	-0.056122	13.6366	0.123985	0.902499	0.998783	-5.66382
Q9JKR6	Hypoxia up-regulated protein 1 (GRP-170) (140 kDa Ca(2+)-binding protein) (CBP-140)	0.159493	12.0516	-0.276766	0.78509	0.998783	-5.40827
Q9JL15	Galectin-8 (Gal-8) (LGALS-8)	0.245858	12.6049	-0.43339	0.669843	0.998783	-5.35686
Q9JLB4	Cubilin (Intrinsic factor-cobalamin receptor)	0.840129	17.6143	-1.61782	0.120529	0.998783	-4.53705
Q9JLJ2	4-trimethylaminobutyraldehyde dehydrogenase (TMABA-DH) (TMABADH) (EC 1.2.1.47) (Aldehyde dehydrogenase family 9 member A1) (EC 1.2.1.3)	-0.106435	12.8514	0.165324	0.870919	0.998783	-5.57561
Q9JLK4	Calcium-binding protein 2 (CaBP2)	0.123041	14.2022	-0.206279	0.838752	0.998783	-5.47754
Q9JLT2	Trehalase (EC 3.2.1.28) (Alpha,alpha-trehalase) (Alpha,alpha-trehalose glucohydrolase)	-0.0850718	17.8253	0.158071	0.875901	0.998783	-5.65938
Q9JLT4	Thioredoxin reductase 2, mitochondrial (EC 1.8.1.9) (Thioredoxin reductase TR3)	-0.552721	13.1837	1.23781	0.22936	0.998783	-4.98926
Q9JM76	Actin-related protein 2/3 complex subunit 3 (Arp2/3 complex 21 kDa subunit) (p21-ARC)	-0.0554507	12.6251	0.061074	0.95205	0.998783	-5.12757
Q9JM84	Cystatin 10 (Carminerin)	-0.546903	12.52	1.33433	0.196294	0.998783	-4.88368
Q9JM95	Alpha-N-acetylgalactosaminide alpha-2,6-sialyltransferase 6 (EC 2.4.99.-) (GalNAc alpha-2,6-sialyltransferase VI) (ST6GalNAc VI) (ST6GalNAcVI) (Sialyltransferase 7F) (SIAT7-F)	0.687395	12.6234	-0.890989	0.385276	0.998783	-4.93407
Q9JMA9	Sodium- and chloride-dependent neutral and basic amino acid transporter B(0+) (Amino acid transporter ATB0+) (Colonic system B0+ amino acid transporter CATB0+) (Solute carrier family 6 member 14)	-0.115622	14.9987	0.223673	0.82516	0.998783	-5.64781
Q9JMH6	Thioredoxin reductase 1, cytoplasmic (TR) (EC 1.8.1.9) (Peroxidase TXNRD1) (EC 1.11.1.2) (Thioredoxin reductase TR1)	0.0289867	14.8013	-0.0638285	0.949707	0.998783	-5.66905
Q9NYQ2	2-Hydroxyacid oxidase 2 (HAOX2) (EC 1.1.3.15) ((S)-2-hydroxy-acid oxidase, peroxisomal) (Medium chain alpha-hydroxy acid oxidase) (Medium-chain L-2-hydroxy acid oxidase)	0.0730685	12.9341	-0.134291	0.894506	0.998783	-5.58002
Q9QUI0	Transforming protein RhoA (EC 3.6.5.2)	0.358338	12.5125	-0.610594	0.550398	0.998783	-5.41921
Q9QUJ7	Long-chain-fatty-acid--CoA ligase 4 (EC 6.2.1.3) (Arachidonate--CoA ligase) (EC 6.2.1.15) (Long-chain acyl-CoA synthetase 4) (LACS 4) (mACS4)	-0.25779	10.668	0.605067	0.551894	0.998783	-5.4241
Q9QUM9	Proteasome subunit alpha type-6 (Macropain iota chain) (Multicatalytic endopeptidase complex iota chain) (Proteasome iota chain)	0.411629	14.9935	-0.825448	0.418338	0.998783	-5.36118
Q9QUR6	Prolyl endopeptidase (PE) (EC 3.4.21.26) (Post-proline cleaving enzyme)	-0.149146	14.5195	0.320602	0.75166	0.998783	-5.6235
Q9QWG7	Sulfotransferase 1B1 (ST1B1) (EC 2.8.2.1) (DOPA/tyrosine sulfotransferase) (Sulfotransferase family cytosolic 1B member 1)	0.419128	13.0926	-0.739876	0.468356	0.998783	-5.25307
Q9QWL7	Keratin, type I cytoskeletal 17 (Cytokeratin-17) (CK-17) (Keratin-17) (K17)	0.246497	12.0717	-0.537161	0.597043	0.998783	-5.46415
Q9QWR8	Alpha-N-acetylgalactosaminidase (EC 3.2.1.49) (Alpha-galactosidase B)	-0.697222	13.897	1.39414	0.177761	0.998783	-4.81499
Q9QX15	Calcium-activated chloride channel regulator 3A-1 (EC 3.4.-.-)	-0.18568	14.4357	0.362836	0.720331	0.998783	-5.61022
Q9QXS1	Plectin (PCN) (PLTN) (Plectin-1) (Plectin-6)	0.0181744	13.3441	-0.0287567	0.977373	0.998783	-5.4408
Q9QXT0	Protein canopy homolog 2 (MIR-interacting saposin-like protein) (Putative secreted protein ZSIG9) (Transmembrane protein 4)	-1.31139	12.7329	2.19283	0.0415967	0.998783	-3.64705
Q9QXX4	Electrogenic aspartate/glutamate antiporter SLC25A13, mitochondrial (Citrin) (Solute carrier family 25 member 13)	-0.281937	12.0754	0.47194	0.642924	0.998783	-5.28679
Q9QYA2	Mitochondrial import receptor subunit TOM40 homolog (Mitochondrial outer membrane protein of 35 kDa) (MOM35) (Protein Haymaker) (Translocase of outer membrane 40 kDa subunit homolog)	-0.0748223	12.4313	0.163311	0.871825	0.998783	-5.6586
Q9QYF1	Retinol dehydrogenase 11 (EC 1.1.1.300) (Androgen-regulated short-chain dehydrogenase/reductase 1) (Cell line MC/9.IL4-derived protein 1) (M42C60) (Prostate short-chain dehydrogenase/reductase 1) (Retinal reductase 1) (RalR1) (Short-chain aldehyde dehydrogenase) (SCALD)	0.462075	12.9973	-0.487714	0.632313	0.998783	-5.04549
Q9QYZ9	Serine protease 30 (EC 3.4.21.-) (Distal intestinal serine protease) (Transmembrane serine protease 8)	-0.220723	12.8272	0.436946	0.666801	0.998783	-5.50515
Q9QZ06	Toll-interacting protein	-0.363103	12.5805	0.685033	0.501538	0.998783	-5.29292
Q9QZ88	Vacuolar protein sorting-associated protein 29 (Vesicle protein sorting 29)	-0.044933	12.5827	0.0496383	0.96102	0.998783	-5.12657
Q9QZD8	Mitochondrial dicarboxylate carrier (DIC) (Solute carrier family 25 member 10)	-0.129117	12.3867	0.228726	0.821642	0.998783	-5.41868
Q9QZE5	Coatomer subunit gamma-1 (Gamma-1-coat protein) (Gamma-1-COP)	-0.161538	12.215	0.222065	0.826889	0.998783	-5.20803
Q9QZN4	F-box only protein 6 (F-box only protein 6b) (F-box protein that recognizes sugar chains 2) (F-box/G-domain protein 2)	0.534648	14.1073	-1.1281	0.271923	0.998783	-5.10105
Q9QZQ8	Core histone macro-H2A.1 (Histone macroH2A1) (mH2A1) (H2A.y) (H2A/y)	0.654019	12.401	-1.06401	0.302089	0.998783	-4.92244
Q9R097	Kunitz-type protease inhibitor 1 (Hepatocyte growth factor activator inhibitor type 1) (HAI-1)	0.179206	10.7933	-0.264107	0.794848	0.998783	-5.21119
Q9R098	Hepatocyte growth factor activator (HGF activator) (HGFA) (EC 3.4.21.-) [Cleaved into: Hepatocyte growth factor activator short chain; Hepatocyte growth factor activator long chain]	0.101561	11.0158	-0.170887	0.866716	0.998783	-5.4832
Q9R0H0	Peroxisomal acyl-coenzyme A oxidase 1 (AOX) (EC 1.3.3.6) (Palmitoyl-CoA oxidase) (Peroxisomal fatty acyl-CoA oxidase) (Straight-chain acyl-CoA oxidase) [Cleaved into: Peroxisomal acyl-CoA oxidase 1, A chain; Peroxisomal acyl-CoA oxidase 1, B chain; Peroxisomal acyl-CoA oxidase 1, C chain]	-0.717422	13.0025	1.1729	0.258416	0.998783	-5.05418
Q9R0N7	Synaptotagmin-7 (Synaptotagmin VII) (SytVII)	0.115302	11.4048	-0.267536	0.791778	0.998783	-5.55884
Q9R0P3	S-formylglutathione hydrolase (FGH) (EC 3.1.2.12) (Esterase 10) (Esterase D) (Sid 478)	-0.628321	12.8207	1.1914	0.247352	0.998783	-4.97004
Q9R0P5	Destrin (Actin-depolymerizing factor) (ADF) (Sid 23)	0.485914	14.0686	-0.865617	0.398863	0.998783	-5.32865
Q9R0P6	Signal peptidase complex catalytic subunit SEC11A (EC 3.4.21.89) (Endopeptidase SP18) (Microsomal signal peptidase 18 kDa subunit) (SPase 18 kDa subunit) (SEC11 homolog A) (SEC11-like protein 1) (SPC18) (Sid 2895)	-0.825696	13.0273	1.70007	0.104514	0.998783	-4.37688
Q9R0Q9	Mannose-P-dolichol utilization defect 1 protein (Suppressor of Lec15 and Lec35 glycosylation mutation homolog) (SL15)	-0.779884	11.1172	1.64776	0.115726	0.998783	-4.4213
Q9R100	Cadherin-17 (BILL-cadherin) (Liver-intestine cadherin) (LI-cadherin) (P130)	0.727346	18.2028	-1.41725	0.170983	0.998783	-4.78779
Q9R111	Guanine deaminase (Guanase) (Guanine aminase) (EC 3.5.4.3) (Guanine aminohydrolase) (GAH)	-0.0907407	14.0981	0.192391	0.849272	0.998783	-5.65382
Q9R112	Sulfide:quinone oxidoreductase, mitochondrial (SQOR) (EC 1.8.5.8) (Sulfide quinone oxidoreductase)	-0.0700045	14.9776	0.128871	0.898703	0.998783	-5.66324
Q9R1J0	Sterol-4-alpha-carboxylate 3-dehydrogenase, decarboxylating (EC 1.1.1.170)	-0.508929	12.5939	0.98428	0.336659	0.998783	-5.16112
Q9R1P0	Proteasome subunit alpha type-4 (Macropain subunit C9) (Multicatalytic endopeptidase complex subunit C9) (Proteasome component C9) (Proteasome subunit L)	0.440858	15.3123	-0.917562	0.369201	0.998783	-5.28976
Q9R1P1	Proteasome subunit beta type-3 (Proteasome chain 13) (Proteasome component C10-II) (Proteasome theta chain)	0.16638	12.9295	-0.350938	0.729109	0.998783	-5.61412
Q9R1P3	Proteasome subunit beta type-2 (Macropain subunit C7-I) (Multicatalytic endopeptidase complex subunit C7-I) (Proteasome component C7-I)	0.371795	13.6371	-0.829721	0.41597	0.998783	-5.35802
Q9R1P4	Proteasome subunit alpha type-1 (Macropain subunit C2) (Multicatalytic endopeptidase complex subunit C2) (Proteasome component C2) (Proteasome nu chain)	0.15716	15.345	-0.304286	0.763886	0.998783	-5.62819
Q9R1Z7	6-pyruvoyl tetrahydrobiopterin synthase (PTP synthase) (PTPS) (EC 4.2.3.12)	0.457521	12.9622	-0.960281	0.348304	0.998783	-5.18402
Q9WTI7	Unconventional myosin-Ic (Myosin I beta) (MMI-beta) (MMIb)	0.288516	11.7137	-0.341233	0.737332	0.998783	-5.08711
Q9WTP6	Adenylate kinase 2, mitochondrial (AK 2) (EC 2.7.4.3) (ATP-AMP transphosphorylase 2) (ATP:AMP phosphotransferase) (Adenylate monophosphate kinase)	0.299991	12.8997	-0.375085	0.7122	0.998783	-5.17359
Q9WTP7	GTP:AMP phosphotransferase AK3, mitochondrial (EC 2.7.4.10) (Adenylate kinase 3) (AK 3) (Adenylate kinase 3 alpha-like 1)	-0.574532	15.2451	0.953125	0.352413	0.998783	-5.15024
Q9WU03	Kunitz-type protease inhibitor 2 (Hepatocyte growth factor activator inhibitor type 2) (HAI-2)	-0.175066	12.8234	0.365522	0.718533	0.998783	-5.53089
Q9WU78	Programmed cell death 6-interacting protein (ALG-2-interacting protein 1) (ALG-2-interacting protein X) (E2F1-inducible protein) (Eig2)	0.117442	13.0969	-0.255657	0.800688	0.998783	-5.64074
Q9WU81	Glucose-6-phosphate exchanger SLC37A2 (Solute carrier family 37 member 2) (cAMP-inducible protein 2)	1.00461	11.9359	-2.1593	0.0430659	0.998783	-3.7177
Q9WUA3	ATP-dependent 6-phosphofructokinase, platelet type (ATP-PFK) (PFK-P) (EC 2.7.1.11) (6-phosphofructokinase type C) (Phosphofructo-1-kinase isozyme C) (PFK-C) (Phosphohexokinase)	0.35134	12.1956	-0.742368	0.466881	0.998783	-5.30344
Q9WUM3	Coronin-1B (Coronin-2)	0.362712	12.8599	-0.613842	0.546944	0.998783	-5.28094
Q9WUM4	Coronin-1C (Coronin-3)	0.516725	12.0897	-0.966505	0.346505	0.998783	-5.05093
Q9WUM5	Succinate--CoA ligase [ADP/GDP-forming] subunit alpha, mitochondrial (EC 6.2.1.4) (EC 6.2.1.5) (Succinyl-CoA synthetase subunit alpha) (SCS-alpha)	0.43076	12.8692	-0.679443	0.505438	0.998783	-5.2454
Q9WUU7	Cathepsin Z (EC 3.4.18.1)	-0.0563169	14.1668	0.116975	0.908039	0.998783	-5.58526
Q9WUZ9	Ectonucleoside triphosphate diphosphohydrolase 5 (NTPDase 5) (EC 3.6.1.6) (CD39 antigen-like 4) (ER-UDPase) (Guanosine-diphosphatase ENTPD5) (GDPase ENTPD5) (Nucleoside diphosphatase) (Uridine-diphosphatase ENTPD5) (UDPase ENTPD5)	-0.76528	13.0533	1.24985	0.227243	0.998783	-4.80117
Q9WV27;Q9Z1W8	Sodium/potassium-transporting ATPase subunit alpha-4 (Na(+)/K(+) ATPase alpha-4 subunit) (EC 7.2.2.13) (Sodium pump subunit alpha-4)	0.120552	14.1457	-0.231949	0.81904	0.998783	-5.52206
Q9WV32	Actin-related protein 2/3 complex subunit 1B (Arp2/3 complex 41 kDa subunit) (p41-ARC)	-0.178361	12.4908	0.334841	0.741388	0.998783	-5.44712
Q9WV54	Acid ceramidase (AC) (ACDase) (Acid CDase) (EC 3.5.1.23) (Acylsphingosine deacylase) (N-acylethanolamine hydrolase ASAH1) (EC 3.5.1.-) (N-acylsphingosine amidohydrolase) [Cleaved into: Acid ceramidase subunit alpha; Acid ceramidase subunit beta]	-0.10776	13.7967	0.236616	0.815233	0.998783	-5.64506
Q9WV85	Nucleoside diphosphate kinase 3 (NDK 3) (NDP kinase 3) (EC 2.7.4.6) (DR-nm23) (Nucleoside diphosphate kinase C) (NDPKC) (nm23-M3)	-0.447289	11.7806	0.852622	0.404989	0.998783	-5.13548
Q9WVA4	Transgelin-2 (SM22-beta)	-0.219206	12.1034	0.40607	0.689196	0.998783	-5.41708
Q9WVC8	Chloride anion exchanger (Down-regulated in adenoma) (Protein DRA) (Solute carrier family 26 member 3)	0.746483	14.4001	-1.65307	0.113096	0.998783	-4.49038
Q9WVE8	Protein kinase C and casein kinase substrate in neurons protein 2 (Syndapin-2) (Syndapin-II) (SdpII)	-0.4944	15.8153	0.879928	0.38928	0.998783	-5.24506
Q9WVJ3	Carboxypeptidase Q (EC 3.4.17.-) (Hematopoietic lineage switch 2) (Plasma glutamate carboxypeptidase)	0.289915	14.3117	-0.641304	0.528219	0.998783	-5.48265
Q9WVK4	EH domain-containing protein 1 (PAST homolog 1) (mPAST1)	0.334824	12.7544	-0.685409	0.500535	0.998783	-5.45619
Q9WVP1	AP-1 complex subunit mu-2 (AP-mu chain family member mu1B) (Adaptor protein complex AP-1 subunit mu-2) (Adaptor-related protein complex 1 subunit mu-2) (Clathrin assembly protein complex 1 mu-2 medium chain 2) (Golgi adaptor HA1/AP1 adaptin mu-2 subunit) (Mu-adaptin 2) (Mu1B-adaptin)	0.136478	12.1629	-0.158242	0.876229	0.998783	-5.11872
Q9Z0F4	Calcium and integrin-binding protein 1 (CIB) (Calmyrin) (DNA-PKcs-interacting protein) (Kinase-interacting protein) (KIP)	0.448201	13.4691	-0.896763	0.379947	0.998783	-5.30649
Q9Z0G9	Claudin-3 (Clostridium perfringens enterotoxin receptor 2) (CPE-R 2) (CPE-receptor 2)	0.296749	14.7541	-0.626193	0.537893	0.998783	-5.49133
Q9Z0J0	NPC intracellular cholesterol transporter 2 (Epididymal secretory protein E1) (mE1) (Niemann Pick type C2 protein homolog)	0.123256	16.5997	-0.224165	0.824782	0.998783	-5.64771
Q9Z0K8	Pantetheinase (EC 3.5.1.92) (Pantetheine hydrolase) (Vascular non-inflammatory molecule 1) (Vanin-1)	0.108347	16.9358	-0.206451	0.838414	0.998783	-5.65123
Q9Z0N1	Eukaryotic translation initiation factor 2 subunit 3, X-linked (EC 3.6.5.3) (Eukaryotic translation initiation factor 2 subunit gamma, X-linked) (eIF-2-gamma X)	-0.976204	11.4104	1.17027	0.258889	0.998783	-4.67663
Q9Z0S1	3'(2'),5'-bisphosphate nucleotidase 1 (EC 3.1.3.7) (Bisphosphate 3'-nucleotidase 1) (PAP-inositol 1,4-phosphatase) (PIP)	-0.234204	12.1958	0.418914	0.680199	0.998783	-5.36605
Q9Z0X1	Apoptosis-inducing factor 1, mitochondrial (EC 1.6.99.-) (Programmed cell death protein 8)	-0.126593	12.1979	0.241754	0.811543	0.998783	-5.51999
Q9Z0Y2	Phospholipase A2 (EC 3.1.1.4) (Group IB phospholipase A2) (PLA2-Ib) (Phosphatidylcholine 2-acylhydrolase 1B)	0.002454	20.0917	-0.00414512	0.996732	0.998783	-5.67092
Q9Z0Z4	Hephaestin (EC 1.-.-.-)	-0.434327	12.68	0.762993	0.454772	0.998783	-5.2449
Q9Z1Q5	Chloride intracellular channel protein 1 (Nuclear chloride ion channel 27) (NCC27)	0.122872	14.0171	-0.267032	0.792033	0.998783	-5.638
Q9Z1T2	Thrombospondin-4	0.328684	12.6242	-0.76075	0.455211	0.998783	-5.40713
Q9Z1W8	Potassium-transporting ATPase alpha chain 2 (HK alpha 2) (Non-gastric H(+)/K(+) ATPase subunit alpha) (EC 7.2.2.19) (Non-gastric Na(+)/K(+) ATPase subunit alpha) (EC 7.2.2.13) (Proton pump) (Sodium pump)	-0.0905515	13.8566	0.178496	0.860117	0.998783	-5.57377
Q9Z1Z2	Serine-threonine kinase receptor-associated protein (UNR-interacting protein)	0.03892	13.5867	-0.0835065	0.934235	0.998783	-5.66771
Q9Z261	Claudin-7	0.415992	16.026	-0.841371	0.409559	0.998783	-5.34933
Q9Z280	Phospholipase D1 (PLD 1) (mPLD1) (EC 3.1.4.4) (Choline phosphatase 1) (Phosphatidylcholine-hydrolyzing phospholipase D1)	-0.450084	12.1079	0.802622	0.432198	0.998783	-5.21204
Q9Z2D3	Gasdermin-E (Non-syndromic hearing impairment protein 5 homolog) [Cleaved into: Gasdermin-E, N-terminal (GSDME-NT); Gasdermin-E, C-terminal (GSDME-CT)]	1.43441	12.5558	-1.54564	0.1413	0.998783	-4.37078
Q9Z2H7	PDZ domain-containing protein GIPC2 (SemaF cytoplasmic domain-associated protein 2) (SEMCAP-2)	0.269779	13.6729	-0.557636	0.582952	0.998783	-5.5282
Q9Z2I0	Mitochondrial proton/calcium exchanger protein (Leucine zipper-EF-hand-containing transmembrane protein 1)	0.0334575	12.1095	-0.0601036	0.95273	0.998783	-5.4396
Q9Z2I8	Succinate--CoA ligase [GDP-forming] subunit beta, mitochondrial (EC 6.2.1.4) (GTP-specific succinyl-CoA synthetase subunit beta) (G-SCS) (GTPSCS) (Succinyl-CoA synthetase beta-G chain) (SCS-betaG)	-0.064065	12.7842	0.131488	0.896633	0.998783	-5.66293
Q9Z2I9	Succinate--CoA ligase [ADP-forming] subunit beta, mitochondrial (EC 6.2.1.5) (ATP-specific succinyl-CoA synthetase subunit beta) (A-SCS) (Succinyl-CoA synthetase beta-A chain) (SCS-betaA)	-0.278747	13.0671	0.530033	0.602186	0.998783	-5.42141
Q9Z2K1	Keratin, type I cytoskeletal 16 (Cytokeratin-16) (CK-16) (Keratin-16) (K16)	0.602894	14.0977	-1.26035	0.22128	0.998783	-4.9652
Q9Z2M7	Phosphomannomutase 2 (PMM 2) (EC 5.4.2.8)	-0.0763312	12.3192	0.135256	0.8939	0.998783	-5.43329
Q9Z2T6	Keratin, type II cuticular Hb5 (Keratin-85) (K85) (Type II hair keratin Hb5) (Type-II keratin Kb25)	0.00650625	14.3987	-0.0140482	0.988923	0.998783	-5.67084
Q9Z2U0	Proteasome subunit alpha type-7 (Proteasome subunit RC6-1)	0.143508	14.8844	-0.299495	0.767488	0.998783	-5.62952
Q9Z2U1	Proteasome subunit alpha type-5 (Macropain zeta chain) (Multicatalytic endopeptidase complex zeta chain) (Proteasome zeta chain)	0.158311	14.607	-0.336255	0.739994	0.998783	-5.61876
Q9Z2V4	Phosphoenolpyruvate carboxykinase, cytosolic [GTP] (PEPCK-C) (EC 4.1.1.32) (Serine-protein kinase PCK1) (EC 2.7.11.-)	0.595467	13.9937	-1.04439	0.311324	0.998783	-5.17786
Q9Z2W0	Aspartyl aminopeptidase (EC 3.4.11.21)	0.547251	17.689	-1.06163	0.300387	0.998783	-5.16437
Q9Z2W1	Serine/threonine-protein kinase 25 (EC 2.7.11.1) (Ste20-like kinase) (Sterile 20/oxidant stress-response kinase 1) (SOK-1) (Ste20/oxidant stress response kinase 1)	-0.120497	12.3505	0.220506	0.827941	0.998783	-5.42026
Q9Z2W8	Glutamate receptor 4 (GluR-4) (GluR4) (AMPA-selective glutamate receptor 4) (GluR-D) (Glutamate receptor ionotropic, AMPA 4) (GluA4)	1.33633	13.6635	-2.04636	0.0557413	0.998783	-3.85348
Q9Z2Z6	Mitochondrial carnitine/acylcarnitine carrier protein (Carnitine/acylcarnitine translocase) (CAC) (CACT) (mCAC) (Solute carrier family 25 member 20)	-0.417731	13.8935	0.739825	0.469654	0.998783	-5.41922
P63005	Platelet-activating factor acetylhydrolase IB subunit beta (Lissencephaly-1 protein) (LIS-1) (PAF acetylhydrolase 45 kDa subunit) (PAF-AH 45 kDa subunit) (PAF-AH alpha) (PAFAH alpha)	-0.000580295	11.5974	0.0011932	0.99906	0.99906	-5.58818
A2A8L5	Receptor-type tyrosine-protein phosphatase F (EC 3.1.3.48) (Leukocyte common antigen related) (LAR)	NA	10.8893	NA	NA	NA	NA
A2AB59	Rho GTPase-activating protein 27 (CIN85-associated multi-domain-containing Rho GTPase-activating protein 1) (Rho-type GTPase-activating protein 27)	NA	11.8744	NA	NA	NA	NA
A2ACP1	Tetratricopeptide repeat protein 39A (TPR repeat protein 39A)	NA	10.64	NA	NA	NA	NA
B2RQC6	CAD protein [Includes: Glutamine-dependent carbamoyl-phosphate synthase (EC 6.3.5.5); Aspartate carbamoyltransferase (EC 2.1.3.2); Dihydroorotase (EC 3.5.2.3)]	NA	12.1075	NA	NA	NA	NA
C8YR32	Lipoxygenase homology domain-containing protein 1	NA	14.0889	NA	NA	NA	NA
D3Z7P3	Glutaminase kidney isoform, mitochondrial (GLS) (EC 3.5.1.2) [Cleaved into: Glutaminase kidney isoform, mitochondrial 68 kDa chain; Glutaminase kidney isoform, mitochondrial 65 kDa chain]	NA	12.3675	NA	NA	NA	NA
E9PYK3	Protein mono-ADP-ribosyltransferase PARP4 (EC 2.4.2.-) (ADP-ribosyltransferase diphtheria toxin-like 4) (ARTD4) (Poly [ADP-ribose] polymerase 4) (PARP-4) (Vault poly(ADP-ribose) polymerase) (VPARP) (mVparp)	NA	10.5227	NA	NA	NA	NA
E9Q3E1	Aldehyde dehydrogenase family 3 member B2 (EC 1.2.1.3) (Aldehyde dehydrogenase 8)	NA	11.883	NA	NA	NA	NA
E9Q555	E3 ubiquitin-protein ligase RNF213 (EC 2.3.2.27) (EC 3.6.4.-) (E3 ubiquitin-lipopolysaccharide ligase RNF213) (EC 2.3.2.-) (Mysterin) (RING finger protein 213)	NA	13.8781	NA	NA	NA	NA
E9Q7G0	Nuclear mitotic apparatus protein 1 (Nuclear mitotic apparatus protein) (NuMA protein)	NA	13.9282	NA	NA	NA	NA
F6ZDS4	Nucleoprotein TPR (NPC-associated intranuclear protein) (Translocated promoter region and nuclear basket protein)	NA	13.1044	NA	NA	NA	NA
O08600	Endonuclease G, mitochondrial (Endo G) (EC 3.1.30.-)	NA	11.3633	NA	NA	NA	NA
O08738	Caspase-6 (CASP-6) (EC 3.4.22.59) (Apoptotic protease Mch-2) [Cleaved into: Caspase-6 subunit p18; Caspase-6 subunit p11]	NA	12.2482	NA	NA	NA	NA
O08808	Protein diaphanous homolog 1 (Diaphanous-related formin-1) (DRF1) (p140mDIA) (mDIA1)	NA	12.0047	NA	NA	NA	NA
O09111	NADH dehydrogenase [ubiquinone] 1 beta subcomplex subunit 11, mitochondrial (Complex I-ESSS) (CI-ESSS) (NADH-ubiquinone oxidoreductase ESSS subunit) (Neuronal protein 15.6) (Np15.6) (p15.6)	NA	12.8159	NA	NA	NA	NA
O09114	Prostaglandin-H2 D-isomerase (EC 5.3.99.2) (Glutathione-independent PGD synthase) (Lipocalin-type prostaglandin-D synthase) (Prostaglandin-D2 synthase) (L-PGDS) (PGD2 synthase) (PGDS2)	NA	11.0808	NA	NA	NA	NA
O35114	Lysosome membrane protein 2 (85 kDa lysosomal membrane sialoglycoprotein) (LGP85) (Lysosome membrane protein II) (LIMP II) (Scavenger receptor class B member 2)	NA	12.3321	NA	NA	NA	NA
O35593	26S proteasome non-ATPase regulatory subunit 14 (EC 3.4.19.-) (26S proteasome regulatory subunit RPN11) (MAD1)	NA	10.8688	NA	NA	NA	NA
O35737	Heterogeneous nuclear ribonucleoprotein H (hnRNP H) [Cleaved into: Heterogeneous nuclear ribonucleoprotein H, N-terminally processed]	NA	10.5601	NA	NA	NA	NA
O35963	Ras-related protein Rab-33B	NA	16.2132	NA	NA	NA	NA
O54909;O88451		NA	13.779	NA	NA	NA	NA
O54950	5'-AMP-activated protein kinase subunit gamma-1 (AMPK gamma1) (AMPK subunit gamma-1) (AMPKg)	NA	11.9938	NA	NA	NA	NA
O55026	Ectonucleoside triphosphate diphosphohydrolase 2 (NTPDase 2) (EC 3.6.1.-) (CD39 antigen-like 1) (Ecto-ATP diphosphohydrolase 2) (Ecto-ATPDase 2) (Ecto-ATPase 2)	NA	11.9211	NA	NA	NA	NA
O55098	Serine/threonine-protein kinase 10 (EC 2.7.11.1) (Lymphocyte-oriented kinase)	NA	11.2399	NA	NA	NA	NA
O70133	ATP-dependent RNA helicase A (EC 3.6.4.13) (DEAH box protein 9) (mHEL-5) (Nuclear DNA helicase II) (NDH II) (RNA helicase A) (RHA)	NA	12.1199	NA	NA	NA	NA
O70310	Glycylpeptide N-tetradecanoyltransferase 1 (EC 2.3.1.97) (Myristoyl-CoA:protein N-myristoyltransferase 1) (NMT 1) (Type I N-myristoyltransferase) (Peptide N-myristoyltransferase 1)	NA	9.76843	NA	NA	NA	NA
O70362	Phosphatidylinositol-glycan-specific phospholipase D (PI-G PLD) (EC 3.1.4.50) (Glycoprotein phospholipase D) (Glycosyl-phosphatidylinositol-specific phospholipase D) (GPI-PLD) (GPI-specific phospholipase D)	NA	12.7932	NA	NA	NA	NA
O70400	PDZ and LIM domain protein 1 (C-terminal LIM domain protein 1) (Elfin) (LIM domain protein CLP-36)	NA	11.6981	NA	NA	NA	NA
O70404	Vesicle-associated membrane protein 8 (VAMP-8) (Endobrevin) (Edb)	NA	12.0552	NA	NA	NA	NA
O88543	COP9 signalosome complex subunit 3 (SGN3) (Signalosome subunit 3) (JAB1-containing signalosome subunit 3)	NA	11.807	NA	NA	NA	NA
O88685	26S proteasome regulatory subunit 6A (26S proteasome AAA-ATPase subunit RPT5) (Proteasome 26S subunit ATPase 3) (Tat-binding protein 1) (TBP-1)	NA	11.4481	NA	NA	NA	NA
O88974	Histone-lysine N-methyltransferase SETDB1 (EC 2.1.1.366) (ERG-associated protein with SET domain) (ESET) (SET domain bifurcated 1)	NA	12.625	NA	NA	NA	NA
P01029	Complement C4-B [Cleaved into: Complement C4 beta chain; Complement C4 alpha chain; C4a anaphylatoxin; Complement C4 gamma chain]	NA	12.6937	NA	NA	NA	NA
P01132	Pro-epidermal growth factor (EGF) [Cleaved into: Epidermal growth factor]	NA	12.6358	NA	NA	NA	NA
P01629	Ig kappa chain V-II region 2S1.3	NA	12.6027	NA	NA	NA	NA
P01749	Ig heavy chain V region 3	NA	13.8707	NA	NA	NA	NA
P01810;P01811		NA	15.8683	NA	NA	NA	NA
P01819;P01820	Ig heavy chain V region MOPC 141	NA	15.3782	NA	NA	NA	NA
P01898	H-2 class I histocompatibility antigen, Q10 alpha chain	NA	11.3494	NA	NA	NA	NA
P03953	Complement factor D (EC 3.4.21.46) (28 kDa adipocyte protein) (Adipsin) (C3 convertase activator) (Properdin factor D)	NA	12.4246	NA	NA	NA	NA
P04104;P11679;P50446;Q3TTY5;Q6IFZ6;Q8VED5;Q922U2;Q9Z331		NA	13.8843	NA	NA	NA	NA
P04104;Q6IFZ6;Q6IFZ9;Q6NXH9;Q9R0H5		NA	16.3955	NA	NA	NA	NA
P05132	cAMP-dependent protein kinase catalytic subunit alpha (PKA C-alpha) (EC 2.7.11.11)	NA	13.0972	NA	NA	NA	NA
P07744;P50446;Q3TTY5;Q3UV17;Q6NXH9;Q922U2;Q9Z331		NA	16.6752	NA	NA	NA	NA
P08030	Adenine phosphoribosyltransferase (APRT) (EC 2.4.2.7)	NA	11.5047	NA	NA	NA	NA
P09242	Alkaline phosphatase, tissue-nonspecific isozyme (AP-TNAP) (TNAP) (TNSALP) (EC 3.1.3.1) (Alkaline phosphatase 2) (Alkaline phosphatase liver/bone/kidney isozyme) (Phosphoamidase) (Phosphocreatine phosphatase) (EC 3.9.1.1)	NA	11.9259	NA	NA	NA	NA
P09926	Surfeit locus protein 2 (Surf-2)	NA	12.6982	NA	NA	NA	NA
P10630;P60843;Q91VC3		NA	12.7773	NA	NA	NA	NA
P11589	Major urinary protein 2 (MUP 2)	NA	16.56	NA	NA	NA	NA
P11725	Ornithine transcarbamylase, mitochondrial (OTCase) (EC 2.1.3.3) (Ornithine carbamoyltransferase, mitochondrial)	NA	12.2225	NA	NA	NA	NA
P11928	2'-5'-oligoadenylate synthase 1A ((2-5')oligo(A) synthase 1A) (2-5A synthase 1A) (EC 2.7.7.84) (p42 OAS)	NA	10.8749	NA	NA	NA	NA
P12367	cAMP-dependent protein kinase type II-alpha regulatory subunit	NA	11.1247	NA	NA	NA	NA
P14685	26S proteasome non-ATPase regulatory subunit 3 (26S proteasome regulatory subunit RPN3) (26S proteasome regulatory subunit S3) (Proteasome subunit p58) (Transplantation antigen P91A) (Tum-P91A antigen)	NA	11.4979	NA	NA	NA	NA
P14733	Lamin-B1	NA	12.307	NA	NA	NA	NA
P15208	Insulin receptor (IR) (EC 2.7.10.1) (CD antigen CD220) [Cleaved into: Insulin receptor subunit alpha; Insulin receptor subunit beta]	NA	11.5957	NA	NA	NA	NA
P17183	Gamma-enolase (EC 4.2.1.11) (2-phospho-D-glycerate hydro-lyase) (Enolase 2) (Neural enolase) (Neuron-specific enolase) (NSE)	NA	11.9983	NA	NA	NA	NA
P17809	Solute carrier family 2, facilitated glucose transporter member 1 (Glucose transporter type 1, erythrocyte/brain) (GLUT-1) (GT1)	NA	11.1258	NA	NA	NA	NA
P17879;Q61696	Heat shock 70 kDa protein 1B (Heat shock 70 kDa protein 1) (HSP70.1)	NA	11.3436	NA	NA	NA	NA
P17892;Q6P8U6		NA	17.0241	NA	NA	NA	NA
P18528	Ig heavy chain V region 6.96	NA	13.0269	NA	NA	NA	NA
P18653	Ribosomal protein S6 kinase alpha-1 (S6K-alpha-1) (EC 2.7.11.1) (90 kDa ribosomal protein S6 kinase 1) (p90-RSK 1) (p90RSK1) (p90S6K) (MAP kinase-activated protein kinase 1a) (MAPK-activated protein kinase 1a) (MAPKAP kinase 1a) (MAPKAPK-1a) (Ribosomal S6 kinase 1) (RSK-1)	NA	11.2462	NA	NA	NA	NA
P18760;Q9R0P5		NA	13.3528	NA	NA	NA	NA
P20444;P28867		NA	10.4679	NA	NA	NA	NA
P20918	Plasminogen (EC 3.4.21.7) [Cleaved into: Plasmin heavy chain A; Activation peptide; Angiostatin; Plasmin heavy chain A, short form; Plasmin light chain B]	NA	10.931	NA	NA	NA	NA
P21107	Tropomyosin alpha-3 chain (Gamma-tropomyosin) (Tropomyosin-3)	NA	13.0283	NA	NA	NA	NA
P21271	Unconventional myosin-Vb	NA	11.4188	NA	NA	NA	NA
P21300	Aldo-keto reductase family 1 member B7 (EC 1.1.1.21) (Aldehyde reductase) (AR) (Aldose reductase-related protein 1) (MVDP) (Vas deferens androgen-dependent protein)	NA	10.7718	NA	NA	NA	NA
P21300;P45377		NA	13.457	NA	NA	NA	NA
P21440;P21447;Q9DC29		NA	14.3949	NA	NA	NA	NA
P21614	Vitamin D-binding protein (DBP) (VDB) (Gc-globulin) (Group-specific component)	NA	11.865	NA	NA	NA	NA
P21619	Lamin-B2	NA	12.6036	NA	NA	NA	NA
P22892	AP-1 complex subunit gamma-1 (Adaptor protein complex AP-1 subunit gamma-1) (Adaptor-related protein complex 1 subunit gamma-1) (Clathrin assembly protein complex 1 gamma-1 large chain) (Gamma-adaptin) (Gamma1-adaptin) (Golgi adaptor HA1/AP1 adaptin subunit gamma-1)	NA	11.5651	NA	NA	NA	NA
P23150	H-2 class II histocompatibility antigen, I-E alpha chain	NA	10.5414	NA	NA	NA	NA
P24452	Macrophage-capping protein (Actin regulatory protein CAP-G) (Actin-capping protein GCAP39) (Myc basic motif homolog 1)	NA	11.9701	NA	NA	NA	NA
P24472	Glutathione S-transferase A4 (EC 2.5.1.18) (GST A4-4) (GSTA4-4) (GST class-alpha member 4) (Glutathione S-transferase 5.7) (GST 5.7)	NA	10.1218	NA	NA	NA	NA
P25911	Tyrosine-protein kinase Lyn (EC 2.7.10.2) (V-yes-1 Yamaguchi sarcoma viral related oncogene homolog) (p53Lyn) (p56Lyn)	NA	11.8182	NA	NA	NA	NA
P26350	Prothymosin alpha [Cleaved into: Prothymosin alpha, N-terminally processed; Thymosin alpha]	NA	10.8038	NA	NA	NA	NA
P26883	Peptidyl-prolyl cis-trans isomerase FKBP1A (PPIase FKBP1A) (EC 5.2.1.8) (12 kDa FK506-binding protein) (12 kDa FKBP) (FKBP-12) (Calstabin-1) (FK506-binding protein 1A) (FKBP-1A) (Immunophilin FKBP12) (Rotamase)	NA	11.9591	NA	NA	NA	NA
P28312	Alpha-defensin 5 (Defensin-related cryptdin-5)	NA	16.3843	NA	NA	NA	NA
P28798	Progranulin (PGRN) (Acrogranin) (Epithelin/granulin precursor) (Glycoprotein of 88 Kda) (GP88) (Glycoprotein 88) (PC cell-derived growth factor) (PCDGF) (Proepithelin) (PEPI) [Cleaved into: Paragranulin; Granulin-1; Granulin-2; Granulin-3; Granulin-4; Granulin-5; Granulin-6; Granulin-7]	NA	10.9798	NA	NA	NA	NA
P29477	Nitric oxide synthase, inducible (EC 1.14.13.39) (Inducible NO synthase) (Inducible NOS) (iNOS) (Macrophage NOS) (MAC-NOS) (NOS type II) (Peptidyl-cysteine S-nitrosylase NOS2)	NA	13.1748	NA	NA	NA	NA
P29788	Vitronectin (VN) (S-protein) (Serum-spreading factor)	NA	11.9983	NA	NA	NA	NA
P30681	High mobility group protein B2 (High mobility group protein 2) (HMG-2)	NA	12.2115	NA	NA	NA	NA
P32020	Sterol carrier protein 2 (SCP-2) (Acetyl-CoA C-myristoyltransferase) (EC 2.3.1.155) (Non-specific lipid-transfer protein) (NSL-TP) (Propanoyl-CoA C-acyltransferase) (EC 2.3.1.176) (SCP-2/3-oxoacyl-CoA thiolase) (SCP-2/thiolase) (EC 2.3.1.16) (SCP-chi) (Sterol carrier protein X) (SCP-X)	NA	12.2554	NA	NA	NA	NA
P32921	Tryptophan--tRNA ligase, cytoplasmic (EC 6.1.1.2) (Tryptophanyl-tRNA synthetase) (TrpRS) [Cleaved into: T1-TrpRS; T2-TrpRS]	NA	11.3077	NA	NA	NA	NA
P33175;Q61768	Kinesin heavy chain isoform 5A (Kinesin heavy chain neuron-specific 1) (Neuronal kinesin heavy chain) (NKHC)	NA	12.031	NA	NA	NA	NA
P34022	Ran-specific GTPase-activating protein (HpaII tiny fragments locus 9a protein) (Ran-binding protein 1) (RANBP1)	NA	12.5737	NA	NA	NA	NA
P34914	Bifunctional epoxide hydrolase 2 [Includes: Cytosolic epoxide hydrolase 2 (CEH) (EC 3.3.2.10) (Epoxide hydratase) (Soluble epoxide hydrolase) (SEH); Lipid-phosphate phosphatase (EC 3.1.3.76)]	NA	10.494	NA	NA	NA	NA
P35175	Stefin-1	NA	11.9898	NA	NA	NA	NA
P35459	Lymphocyte antigen 6D (Ly-6D) (Thymocyte B-cell antigen) (ThB)	NA	10.1051	NA	NA	NA	NA
P37804	Transgelin (Actin-associated protein p27) (Smooth muscle protein 22-alpha) (SM22-alpha)	NA	12.1218	NA	NA	NA	NA
P39447	Tight junction protein ZO-1 (Tight junction protein 1) (Zona occludens protein 1) (Zonula occludens protein 1)	NA	11.8237	NA	NA	NA	NA
P40240	CD9 antigen (CD antigen CD9)	NA	12.374	NA	NA	NA	NA
P41105	60S ribosomal protein L28	NA	12.9005	NA	NA	NA	NA
P45377	Aldose reductase-related protein 2 (AR) (EC 1.1.1.21) (Aldehyde reductase) (Fibroblast growth factor-regulated protein) (Protein FR-1)	NA	12.2864	NA	NA	NA	NA
P47226	Testin (TES1/TES2)	NA	10.3367	NA	NA	NA	NA
P47802	Metaxin-1 (Mitochondrial outer membrane import complex protein 1)	NA	11.0182	NA	NA	NA	NA
P47934	Carnitine O-acetyltransferase (Carnitine acetylase) (EC 2.3.1.137) (EC 2.3.1.7) (Carnitine acetyltransferase) (CAT) (CrAT)	NA	11.8342	NA	NA	NA	NA
P48455;P63328	Serine/threonine-protein phosphatase 2B catalytic subunit gamma isoform (EC 3.1.3.16) (CAM-PRP catalytic subunit) (Calcineurin, testis-specific catalytic subunit) (Calmodulin-dependent calcineurin A subunit gamma isoform)	NA	11.2485	NA	NA	NA	NA
P48999	Polyunsaturated fatty acid 5-lipoxygenase (EC 1.13.11.-) (Arachidonate 5-lipoxygenase) (5-LO) (5-lipoxygenase) (EC 1.13.11.34)	NA	12.0981	NA	NA	NA	NA
P49182	Heparin cofactor 2 (Heparin cofactor II) (HC-II) (Protease inhibitor leuserpin-2) (Serpin D1)	NA	12.6429	NA	NA	NA	NA
P49312	Heterogeneous nuclear ribonucleoprotein A1 (hnRNP A1) (HDP-1) (Helix-destabilizing protein) (Single-strand-binding protein) (Topoisomerase-inhibitor suppressed) (hnRNP core protein A1) [Cleaved into: Heterogeneous nuclear ribonucleoprotein A1, N-terminally processed]	NA	11.7803	NA	NA	NA	NA
P49962	Signal recognition particle 9 kDa protein (SRP9)	NA	12.0624	NA	NA	NA	NA
P50171	(3R)-3-hydroxyacyl-CoA dehydrogenase (EC 1.1.1.n12) (17-beta-hydroxysteroid dehydrogenase 8) (17-beta-HSD 8) (3-ketoacyl-[acyl-carrier-protein] reductase alpha subunit) (KAR alpha subunit) (3-oxoacyl-[acyl-carrier-protein] reductase) (Estradiol 17-beta-dehydrogenase 8) (EC 1.1.1.62) (Protein Ke6) (Ke-6) (Testosterone 17-beta-dehydrogenase 8) (EC 1.1.1.239)	NA	12.2724	NA	NA	NA	NA
P50427	Steryl-sulfatase (EC 3.1.6.2) (Arylsulfatase C) (ASC) (Steroid sulfatase) (Steryl-sulfate sulfohydrolase)	NA	10.0006	NA	NA	NA	NA
P50431;Q9CZN7		NA	10.4125	NA	NA	NA	NA
P50446;Q8VED5;Q9Z331		NA	12.8143	NA	NA	NA	NA
P50518	V-type proton ATPase subunit E 1 (V-ATPase subunit E 1) (V-ATPase 31 kDa subunit) (p31) (Vacuolar proton pump subunit E 1)	NA	11.5702	NA	NA	NA	NA
P51410	60S ribosomal protein L9	NA	12.2449	NA	NA	NA	NA
P51863	V-type proton ATPase subunit d 1 (V-ATPase subunit d 1) (P39) (Physophilin) (V-ATPase 40 kDa accessory protein) (V-ATPase AC39 subunit) (Vacuolar proton pump subunit d 1)	NA	11.236	NA	NA	NA	NA
P51910	Apolipoprotein D (Apo-D) (ApoD)	NA	11.9623	NA	NA	NA	NA
P52840	Sulfotransferase 1A1 (ST1A1) (EC 2.8.2.1) (Aryl sulfotransferase) (Phenol sulfotransferase) (Phenol/aryl sulfotransferase) (mSTp1) (ST1A4) (Sulfokinase)	NA	10.2522	NA	NA	NA	NA
P53395	Lipoamide acyltransferase component of branched-chain alpha-keto acid dehydrogenase complex, mitochondrial (EC 2.3.1.168) (Branched-chain alpha-keto acid dehydrogenase complex component E2) (BCKAD-E2) (BCKADE2) (Dihydrolipoamide acetyltransferase component of branched-chain alpha-keto acid dehydrogenase complex) (Dihydrolipoamide branched chain transacylase) (Dihydrolipoyllysine-residue (2-methyl…	NA	12.0572	NA	NA	NA	NA
P53810;P53811		NA	11.7827	NA	NA	NA	NA
P53811	Phosphatidylinositol transfer protein beta isoform (PI-TP-beta) (PtdIns transfer protein beta) (PtdInsTP beta)	NA	11.2844	NA	NA	NA	NA
P54310	Hormone-sensitive lipase (HSL) (EC 3.1.1.79) (Monoacylglycerol lipase LIPE) (EC 3.1.1.23) (Retinyl ester hydrolase) (REH)	NA	13.1496	NA	NA	NA	NA
P55096	ATP-binding cassette sub-family D member 3 (EC 3.1.2.-) (EC 7.6.2.-) (68 kDa peroxisomal membrane protein) (PMP68) (70 kDa peroxisomal membrane protein) (PMP70)	NA	11.9186	NA	NA	NA	NA
P55258;P61027;P61028;P62821;Q8K386;Q9D1G1		NA	17.1741	NA	NA	NA	NA
P56392	Cytochrome c oxidase subunit 7A1, mitochondrial (Cytochrome c oxidase subunit VIIa-heart) (Cytochrome c oxidase subunit VIIa-H) (Cytochrome c oxidase subunit VIIa-muscle) (Cytochrome c oxidase subunit VIIa-M)	NA	11.4092	NA	NA	NA	NA
P56399	Ubiquitin carboxyl-terminal hydrolase 5 (EC 3.4.19.12) (Deubiquitinating enzyme 5) (Isopeptidase T) (Ubiquitin thioesterase 5) (Ubiquitin-specific-processing protease 5)	NA	11.5784	NA	NA	NA	NA
P56654	Cytochrome P450 2C37 (EC 1.14.14.1) (CYPIIC37)	NA	12.4985	NA	NA	NA	NA
P57016	Ladinin-1 (Lad-1) (Linear IgA disease antigen homolog) (LADA)	NA	12.3077	NA	NA	NA	NA
P57776	Elongation factor 1-delta (EF-1-delta)	NA	11.6191	NA	NA	NA	NA
P58059	28S ribosomal protein S21, mitochondrial (MRP-S21) (S21mt)	NA	10.6129	NA	NA	NA	NA
P58137	Acyl-coenzyme A thioesterase 8 (Acyl-CoA thioesterase 8) (EC 3.1.2.1) (EC 3.1.2.11) (EC 3.1.2.2) (EC 3.1.2.3) (EC 3.1.2.5) (Choloyl-coenzyme A thioesterase) (EC 3.1.2.27) (Peroxisomal acyl-CoA thioesterase 2) (PTE-2) (Peroxisomal acyl-coenzyme A thioester hydrolase 1) (PTE-1) (Peroxisomal long-chain acyl-CoA thioesterase 1)	NA	11.1487	NA	NA	NA	NA
P58771	Tropomyosin alpha-1 chain (Alpha-tropomyosin) (Tropomyosin-1)	NA	11.457	NA	NA	NA	NA
P60335	Poly(rC)-binding protein 1 (Alpha-CP1) (Heterogeneous nuclear ribonucleoprotein E1) (hnRNP E1)	NA	12.3455	NA	NA	NA	NA
P60710	Actin, cytoplasmic 1 (Beta-actin) (EC 3.6.4.-) [Cleaved into: Actin, cytoplasmic 1, N-terminally processed]	NA	12.2039	NA	NA	NA	NA
P61028	Ras-related protein Rab-8B	NA	11.913	NA	NA	NA	NA
P61164	Alpha-centractin (Centractin) (ARP1) (Actin-RPV) (Centrosome-associated actin homolog)	NA	10.4065	NA	NA	NA	NA
P61458	Pterin-4-alpha-carbinolamine dehydratase (PHS) (EC 4.2.1.96) (4-alpha-hydroxy-tetrahydropterin dehydratase) (Dimerization cofactor of hepatocyte nuclear factor 1-alpha) (DCoH) (Dimerization cofactor of HNF1) (Phenylalanine hydroxylase-stimulating protein) (Pterin carbinolamine dehydratase) (PCD)	NA	12.8643	NA	NA	NA	NA
P61971	Nuclear transport factor 2 (NTF-2)	NA	11.7975	NA	NA	NA	NA
P61982;Q9CQV8		NA	12.0704	NA	NA	NA	NA
P62082	40S ribosomal protein S7	NA	12.981	NA	NA	NA	NA
P62305	Small nuclear ribonucleoprotein E (snRNP-E) (Sm protein E) (Sm-E) (SmE)	NA	10.7753	NA	NA	NA	NA
P62315	Small nuclear ribonucleoprotein Sm D1 (Sm-D1) (Sm-D autoantigen) (snRNP core protein D1)	NA	11.9174	NA	NA	NA	NA
P62855	40S ribosomal protein S26	NA	12.84	NA	NA	NA	NA
P63030	Mitochondrial pyruvate carrier 1 (Brain protein 44-like protein)	NA	12.2496	NA	NA	NA	NA
P63254	Cysteine-rich protein 1 (CRP-1) (Cysteine-rich intestinal protein) (CRIP)	NA	12.7458	NA	NA	NA	NA
P63260	Actin, cytoplasmic 2 (EC 3.6.4.-) (Gamma-actin) [Cleaved into: Actin, cytoplasmic 2, N-terminally processed]	NA	10.1862	NA	NA	NA	NA
P63323	40S ribosomal protein S12	NA	11.4807	NA	NA	NA	NA
P68372;Q922F4		NA	13.6069	NA	NA	NA	NA
P70124	Serpin B5 (Maspin) (Peptidase inhibitor 5) (PI-5)	NA	12.5123	NA	NA	NA	NA
P70172	Ileal sodium/bile acid cotransporter (Apical sodium-dependent bile acid transporter) (ASBT) (Ileal Na(+)/bile acid cotransporter) (Ileal sodium-dependent bile acid transporter) (IBAT) (ISBT) (Na(+)-dependent ileal bile acid transporter) (Sodium/taurocholate cotransporting polypeptide, ileal) (Solute carrier family 10 member 2)	NA	12.1494	NA	NA	NA	NA
P70227	Inositol 1,4,5-trisphosphate receptor type 3 (IP3 receptor isoform 3) (IP3R 3) (InsP3R3) (Type 3 inositol 1,4,5-trisphosphate receptor) (Type 3 InsP3 receptor)	NA	11.6325	NA	NA	NA	NA
P70245	3-beta-hydroxysteroid-Delta(8),Delta(7)-isomerase (EC 5.3.3.5) (Cholestenol Delta-isomerase) (Delta(8)-Delta(7) sterol isomerase) (D8-D7 sterol isomerase) (Emopamil-binding protein)	NA	13.1996	NA	NA	NA	NA
P70269	Cathepsin E (EC 3.4.23.34)	NA	12.0928	NA	NA	NA	NA
P70388	DNA repair protein RAD50 (mRad50) (EC 3.6.-.-)	NA	13.5998	NA	NA	NA	NA
P80315	T-complex protein 1 subunit delta (TCP-1-delta) (A45) (CCT-delta)	NA	12.3529	NA	NA	NA	NA
P97371	Proteasome activator complex subunit 1 (11S regulator complex subunit alpha) (REG-alpha) (Activator of multicatalytic protease subunit 1) (Proteasome activator 28 subunit alpha) (PA28a) (PA28alpha)	NA	12.0966	NA	NA	NA	NA
P97372	Proteasome activator complex subunit 2 (11S regulator complex subunit beta) (REG-beta) (Activator of multicatalytic protease subunit 2) (Proteasome activator 28 subunit beta) (PA28b) (PA28beta)	NA	12.9204	NA	NA	NA	NA
P97742;Q924X2		NA	13.6071	NA	NA	NA	NA
P99024	Tubulin beta-5 chain	NA	11.8012	NA	NA	NA	NA
Q00623	Apolipoprotein A-I (Apo-AI) (ApoA-I) (Apolipoprotein A1) [Cleaved into: Proapolipoprotein A-I (ProapoA-I); Truncated apolipoprotein A-I]	NA	12.6684	NA	NA	NA	NA
Q00PI9	Heterogeneous nuclear ribonucleoprotein U-like protein 2 (MLF1-associated nuclear protein)	NA	12.2481	NA	NA	NA	NA
Q01149	Collagen alpha-2(I) chain (Alpha-2 type I collagen)	NA	15.2732	NA	NA	NA	NA
Q04207	Transcription factor p65 (Nuclear factor NF-kappa-B p65 subunit) (Nuclear factor of kappa light polypeptide gene enhancer in B-cells 3)	NA	11.3391	NA	NA	NA	NA
Q04592	Proprotein convertase subtilisin/kexin type 5 (EC 3.4.21.-) (Proprotein convertase 5) (PC5) (Proprotein convertase 6) (PC6) (Subtilisin-like proprotein convertase 6) (SPC6) (Subtilisin/kexin-like protease PC5)	NA	12.0668	NA	NA	NA	NA
Q08879	Fibulin-1 (FIBL-1) (Basement-membrane protein 90) (BM-90)	NA	12.8939	NA	NA	NA	NA
Q0VBK2	Keratin, type II cytoskeletal 80 (Cytokeratin-80) (CK-80) (Keratin-80) (K80) (Type-II keratin Kb20)	NA	11.471	NA	NA	NA	NA
Q14AT2	Testis-expressed protein 11 (Protein ZIP4 homolog) (ZIP4H)	NA	13.329	NA	NA	NA	NA
Q19LI2	Alpha-1B-glycoprotein (Alpha-1-B glycoprotein)	NA	13.96	NA	NA	NA	NA
Q3TJ91	LLGL scribble cell polarity complex component 2 (Lethal giant larvae-like protein 2) (Lethal(2) giant larvae protein homolog 2)	NA	11.6682	NA	NA	NA	NA
Q3TZZ7	Extended synaptotagmin-2 (E-Syt2)	NA	12.3307	NA	NA	NA	NA
Q3UIA2	Rho GTPase-activating protein 17 (Neuron-associated developmentally-regulated protein) (Nadrin) (Rho-type GTPase-activating protein 17)	NA	10.4746	NA	NA	NA	NA
Q3ULD5	Methylcrotonoyl-CoA carboxylase beta chain, mitochondrial (MCCase subunit beta) (EC 6.4.1.4) (3-methylcrotonyl-CoA carboxylase 2) (3-methylcrotonyl-CoA carboxylase non-biotin-containing subunit) (3-methylcrotonyl-CoA:carbon dioxide ligase subunit beta)	NA	11.5785	NA	NA	NA	NA
Q3UMY5	Echinoderm microtubule-associated protein-like 4 (EMAP-4)	NA	11.8311	NA	NA	NA	NA
Q3UPL0	Protein transport protein Sec31A (SEC31-like protein 1) (SEC31-related protein A)	NA	11.6551	NA	NA	NA	NA
Q3UV17;Q9R0H5		NA	11.5216	NA	NA	NA	NA
Q3UW53	Protein Niban 1 (Protein FAM129A) (Protein Niban)	NA	11.8165	NA	NA	NA	NA
Q3UZZ6	Sulfotransferase 1 family member D1 (ST1D1) (EC 2.8.2.-) (Amine N-sulfotransferase) (SULT-N) (Dopamine sulfotransferase Sult1d1) (Tyrosine-ester sulfotransferase)	NA	13.1685	NA	NA	NA	NA
Q501J6;Q61656	Probable ATP-dependent RNA helicase DDX17 (EC 3.6.4.13) (DEAD box protein 17)	NA	12.2623	NA	NA	NA	NA
Q5DTT4	Retrotransposon Gag-like protein 5 (Retrotransposon gag domain-containing protein 4)	NA	13.5631	NA	NA	NA	NA
Q5SSL4	Active breakpoint cluster region-related protein	NA	11.5526	NA	NA	NA	NA
Q60631	Growth factor receptor-bound protein 2 (Adapter protein GRB2) (SH2/SH3 adapter GRB2)	NA	11.4284	NA	NA	NA	NA
Q60668	Heterogeneous nuclear ribonucleoprotein D0 (hnRNP D0) (AU-rich element RNA-binding protein 1)	NA	11.9688	NA	NA	NA	NA
Q60718	Disintegrin and metalloproteinase domain-containing protein 2 (ADAM 2) (Fertilin subunit beta) (PH-30) (PH30) (PH30-beta)	NA	13.7653	NA	NA	NA	NA
Q60972	Histone-binding protein RBBP4 (Chromatin assembly factor 1 subunit C) (CAF-1 subunit C) (Chromatin assembly factor I p48 subunit) (CAF-I 48 kDa subunit) (CAF-I p48) (Nucleosome-remodeling factor subunit RBAP48) (Retinoblastoma-binding protein 4) (RBBP-4) (Retinoblastoma-binding protein p48)	NA	11.7499	NA	NA	NA	NA
Q61133	Glutathione S-transferase theta-2 (EC 2.5.1.18) (GST class-theta-2)	NA	10.9264	NA	NA	NA	NA
Q61147	Ceruloplasmin (EC 1.16.3.1) (Ferroxidase)	NA	10.8451	NA	NA	NA	NA
Q61176	Arginase-1 (EC 3.5.3.1) (Liver-type arginase) (Type I arginase)	NA	11.2839	NA	NA	NA	NA
Q61495	Desmoglein-1-alpha (Desmoglein-1) (Dsg1-alpha) (DG1) (DGI) (Desmosomal glycoprotein I)	NA	12.7818	NA	NA	NA	NA
Q61735	Leukocyte surface antigen CD47 (Integrin-associated protein) (IAP) (CD antigen CD47)	NA	11.6086	NA	NA	NA	NA
Q61768	Kinesin-1 heavy chain (Conventional kinesin heavy chain) (Ubiquitous kinesin heavy chain) (UKHC)	NA	11.5706	NA	NA	NA	NA
Q61781	Keratin, type I cytoskeletal 14 (Cytokeratin-14) (CK-14) (Keratin-14) (K14)	NA	12.4929	NA	NA	NA	NA
Q61781;Q6IFX2		NA	10.2112	NA	NA	NA	NA
Q61781;Q9Z2K1		NA	14.0996	NA	NA	NA	NA
Q61878	Bone marrow proteoglycan (BMPG) (Proteoglycan 2) [Cleaved into: Eosinophil granule major basic protein (EMBP) (MBP)]	NA	12.5543	NA	NA	NA	NA
Q61879;Q8VDD5		NA	13.9326	NA	NA	NA	NA
Q62086	Serum paraoxonase/arylesterase 2 (PON 2) (EC 3.1.1.2) (EC 3.1.1.81) (Aromatic esterase 2) (A-esterase 2) (Serum aryldialkylphosphatase 2)	NA	12.5872	NA	NA	NA	NA
Q62167	ATP-dependent RNA helicase DDX3X (EC 3.6.4.13) (D1Pas1-related sequence 2) (DEAD box RNA helicase DEAD3) (mDEAD3) (DEAD box protein 3, X-chromosomal) (Embryonic RNA helicase)	NA	11.1031	NA	NA	NA	NA
Q62266	Cornifin-A (Small proline-rich protein 1A) (SPR1 A) (SPR1A)	NA	12.9018	NA	NA	NA	NA
Q62393	Tumor protein D52 (mD52)	NA	12.7956	NA	NA	NA	NA
Q64010	Adapter molecule crk (Proto-oncogene c-Crk) (p38)	NA	11.3076	NA	NA	NA	NA
Q64105	Sepiapterin reductase (SPR) (EC 1.1.1.153)	NA	11.9854	NA	NA	NA	NA
Q64302	Transmembrane 4 L6 family member 1 (Membrane component chromosome 3 surface marker 1 homolog) (Tumor-associated antigen L6)	NA	12.396	NA	NA	NA	NA
Q64310	Surfeit locus protein 4	NA	11.1773	NA	NA	NA	NA
Q64464	Cytochrome P450 3A13 (EC 1.14.14.1) (CYPIIIA13)	NA	11.8837	NA	NA	NA	NA
Q64511	DNA topoisomerase 2-beta (EC 5.6.2.2) (DNA topoisomerase II, beta isozyme)	NA	11.5554	NA	NA	NA	NA
Q6IME9	Keratin, type II cytoskeletal 72 (Cytokeratin-72) (CK-72) (Keratin-72) (K72) (Type II inner root sheath-specific keratin-K6irs2) (Type-II keratin Kb35)	NA	11.2125	NA	NA	NA	NA
Q6IRU5	Clathrin light chain B (Lcb)	NA	12.681	NA	NA	NA	NA
Q6NVG7	Procollagen galactosyltransferase 2 (EC 2.4.1.50) (Collagen beta(1-O)galactosyltransferase 2) (Glycosyltransferase 25 family member 2) (Hydroxylysine galactosyltransferase 2)	NA	14.3959	NA	NA	NA	NA
Q6P1F6	Serine/threonine-protein phosphatase 2A 55 kDa regulatory subunit B alpha isoform (PP2A subunit B isoform B55-alpha) (PP2A subunit B isoform PR55-alpha) (PP2A subunit B isoform R2-alpha) (PP2A subunit B isoform alpha)	NA	11.5843	NA	NA	NA	NA
Q6P1H6	Ankyrin repeat and LEM domain-containing protein 2 (LEM domain-containing protein 4)	NA	13.3276	NA	NA	NA	NA
Q6P3D0	U8 snoRNA-decapping enzyme (EC 3.6.1.62) (IDP phosphatase) (IDPase) (EC 3.6.1.64) (Inosine diphosphate phosphatase) (Nucleoside diphosphate-linked moiety X motif 16) (Nudix motif 16) (m7GpppN-mRNA hydrolase)	NA	10.5112	NA	NA	NA	NA
Q6P4T0	Autophagy-related protein 2 homolog A	NA	15.9222	NA	NA	NA	NA
Q6ZQ06	Centrosomal protein of 162 kDa (Cep162) (Protein QN1 homolog)	NA	14.1443	NA	NA	NA	NA
Q6ZQ38	Cullin-associated NEDD8-dissociated protein 1 (Cullin-associated and neddylation-dissociated protein 1) (p120 CAND1)	NA	10.7558	NA	NA	NA	NA
Q78KK3	Solute carrier family 22 member 18 (Imprinted multi-membrane-spanning polyspecific transporter-related protein 1) (Multi-membrane-spanning polyspecific transporter) (Organic cation transporter-like protein 2) (ORCTL-2)	NA	10.2058	NA	NA	NA	NA
Q791T5	Mitochondrial carrier homolog 1 (Mitochondrial carrier-like protein 1)	NA	11.7362	NA	NA	NA	NA
Q7M6Y3	Phosphatidylinositol-binding clathrin assembly protein (Clathrin assembly lymphoid myeloid leukemia) (CALM)	NA	11.0864	NA	NA	NA	NA
Q7TMC8	L-fucose kinase (Fucokinase) (EC 2.7.1.52)	NA	11.1847	NA	NA	NA	NA
Q7TN37	Transient receptor potential cation channel subfamily M member 4 (Calcium-activated non-selective cation channel 1) (Long transient receptor potential channel 4) (LTrpC-4) (LTrpC4)	NA	10.8702	NA	NA	NA	NA
Q80U72	Protein scribble homolog (Scribble) (Protein LAP4)	NA	13.8195	NA	NA	NA	NA
Q80YN3	Breast carcinoma-amplified sequence 1 homolog (Novel amplified in breast cancer 1 homolog)	NA	12.3454	NA	NA	NA	NA
Q810Q5	Normal mucosa of esophagus-specific gene 1 protein	NA	13.2653	NA	NA	NA	NA
Q8BG32	26S proteasome non-ATPase regulatory subunit 11 (26S proteasome regulatory subunit RPN6) (26S proteasome regulatory subunit S9) (26S proteasome regulatory subunit p44.5)	NA	10.7635	NA	NA	NA	NA
Q8BGC4	Prostaglandin reductase-3 (PTGR-3) (EC 1.3.1.48) (15-oxoprostaglandin 13-reductase) (Zinc-binding alcohol dehydrogenase domain-containing protein 2)	NA	10.607	NA	NA	NA	NA
Q8BH04	Phosphoenolpyruvate carboxykinase [GTP], mitochondrial (PEPCK-M) (EC 4.1.1.32)	NA	11.7828	NA	NA	NA	NA
Q8BH59	Electrogenic aspartate/glutamate antiporter SLC25A12, mitochondrial (Solute carrier family 25 member 12)	NA	11.5778	NA	NA	NA	NA
Q8BJD1	Inter-alpha-trypsin inhibitor heavy chain H5 (ITI heavy chain H5) (ITI-HC5) (Inter-alpha-inhibitor heavy chain 5)	NA	12.0729	NA	NA	NA	NA
Q8BJZ3	Protein lifeguard 3 (Responsive to centrifugal force and shear stress gene 1 protein) (Protein RECS1) (Transmembrane BAX inhibitor motif-containing protein 1)	NA	11.8542	NA	NA	NA	NA
Q8BK72	28S ribosomal protein S27, mitochondrial (MRP-S27) (S27mt) (Mitochondrial ribosomal protein S27)	NA	13.9196	NA	NA	NA	NA
Q8BKX1	Brain-specific angiogenesis inhibitor 1-associated protein 2 (BAI-associated protein 2) (BAI1-associated protein 2) (Insulin receptor substrate protein of 53 kDa) (IRSp53) (Insulin receptor substrate p53) (Insulin receptor tyrosine kinase 53 kDa substrate)	NA	11.042	NA	NA	NA	NA
Q8BKZ9	Pyruvate dehydrogenase protein X component, mitochondrial (Dihydrolipoamide dehydrogenase-binding protein of pyruvate dehydrogenase complex) (Lipoyl-containing pyruvate dehydrogenase complex component X)	NA	11.8237	NA	NA	NA	NA
Q8BP56	Protein-glucosylgalactosylhydroxylysine glucosidase (EC 3.2.1.107) (Acid trehalase-like protein 1)	NA	11.8988	NA	NA	NA	NA
Q8BP67	60S ribosomal protein L24	NA	12.1836	NA	NA	NA	NA
Q8BP74	L-seryl-tRNA(Sec) kinase (EC 2.7.1.164) (O-phosphoseryl-tRNA(Sec) kinase)	NA	12.3262	NA	NA	NA	NA
Q8BTZ7	Mannose-1-phosphate guanyltransferase beta (EC 2.7.7.13) (GDP-mannose pyrophosphorylase B) (GTP-mannose-1-phosphate guanylyltransferase beta)	NA	12.0233	NA	NA	NA	NA
Q8BU31	Ras-related protein Rap-2c (EC 3.6.5.2)	NA	13.52	NA	NA	NA	NA
Q8BU33	2-hydroxyacyl-CoA lyase 2 (EC 4.1.2.-) (Acetolactate synthase-like protein) (IlvB-like protein)	NA	9.95177	NA	NA	NA	NA
Q8BU51	BPI fold-containing family B member 6 (Bactericidal/permeability-increasing protein-like 3)	NA	10.8249	NA	NA	NA	NA
Q8BU88	39S ribosomal protein L22, mitochondrial (L22mt) (MRP-L22)	NA	11.473	NA	NA	NA	NA
Q8BWM0	Prostaglandin E synthase 2 (EC 5.3.99.3) (GATE-binding factor 1) (GBF-1) (Microsomal prostaglandin E synthase 2) (mPGES-2) [Cleaved into: Prostaglandin E synthase 2 truncated form]	NA	12.2711	NA	NA	NA	NA
Q8C052	Microtubule-associated protein 1S (MAP-1S) (BPY2-interacting protein 1) (Microtubule-associated protein 8) [Cleaved into: MAP1S heavy chain; MAP1S light chain]	NA	15.1635	NA	NA	NA	NA
Q8C0P5	Coronin-2A	NA	11.5641	NA	NA	NA	NA
Q8C1B7	Septin-11	NA	11.5197	NA	NA	NA	NA
Q8C7U7	Polypeptide N-acetylgalactosaminyltransferase 6 (EC 2.4.1.41) (Polypeptide GalNAc transferase 6) (GalNAc-T6) (pp-GaNTase 6) (Protein-UDP acetylgalactosaminyltransferase 6) (UDP-GalNAc:polypeptide N-acetylgalactosaminyltransferase 6)	NA	10.5541	NA	NA	NA	NA
Q8CD10	Calcium uptake protein 2, mitochondrial (EF-hand domain-containing family member A1)	NA	11.4287	NA	NA	NA	NA
Q8CDN6	Thioredoxin-like protein 1 (32 kDa thioredoxin-related protein)	NA	11.5427	NA	NA	NA	NA
Q8CFK6	DENN domain-containing protein 1C (Connecdenn 3)	NA	11.6426	NA	NA	NA	NA
Q8CG48	Structural maintenance of chromosomes protein 2 (SMC protein 2) (SMC-2) (Chromosome-associated protein E) (FGF-inducible protein 16) (XCAP-E homolog)	NA	13.1189	NA	NA	NA	NA
Q8CGK3	Lon protease homolog, mitochondrial (EC 3.4.21.53) (Lon protease-like protein) (LONP) (Mitochondrial ATP-dependent protease Lon) (Serine protease 15)	NA	11.2742	NA	NA	NA	NA
Q8CIF6	SID1 transmembrane family member 2	NA	12.3996	NA	NA	NA	NA
Q8CJG0	Protein argonaute-2 (Argonaute2) (mAgo2) (EC 3.1.26.n2) (Argonaute RISC catalytic component 2) (Eukaryotic translation initiation factor 2C 2) (eIF-2C 2) (eIF2C 2) (Piwi/argonaute family protein meIF2C2) (Protein slicer)	NA	10.1562	NA	NA	NA	NA
Q8JZQ2	AFG3-like protein 2 (EC 3.4.24.-)	NA	12.144	NA	NA	NA	NA
Q8K0E8	Fibrinogen beta chain [Cleaved into: Fibrinopeptide B; Fibrinogen beta chain]	NA	12.8515	NA	NA	NA	NA
Q8K0J2	UDP-GlcNAc:betaGal beta-1,3-N-acetylglucosaminyltransferase 7 (BGnT-7) (Beta-1,3-Gn-T7) (Beta-1,3-N-acetylglucosaminyltransferase 7) (Beta3Gn-T7) (EC 2.4.1.-)	NA	12.3239	NA	NA	NA	NA
Q8K2M0	39S ribosomal protein L38, mitochondrial (L38mt) (MRP-L38)	NA	10.9954	NA	NA	NA	NA
Q8K353	Cysteine-rich and transmembrane domain-containing protein 1	NA	12.2339	NA	NA	NA	NA
Q8K370	Acyl-CoA dehydrogenase family member 10 (ACAD-10) (EC 1.3.99.-)	NA	11.3167	NA	NA	NA	NA
Q8K386	Ras-related protein Rab-15	NA	16.0538	NA	NA	NA	NA
Q8K411	Presequence protease, mitochondrial (EC 3.4.24.-) (Pitrilysin metalloproteinase 1)	NA	11.9848	NA	NA	NA	NA
Q8K426	Resistin-like gamma (Resistin-like molecule gamma) (RELMgamma) (Ten-cysteine protein 1) (XCP1)	NA	11.1955	NA	NA	NA	NA
Q8K4X7	1-acyl-sn-glycerol-3-phosphate acyltransferase delta (EC 2.3.1.51) (1-acylglycerol-3-phosphate O-acyltransferase 4) (1-AGP acyltransferase 4) (1-AGPAT 4) (Lysophosphatidic acid acyltransferase delta) (LPAAT-delta)	NA	10.885	NA	NA	NA	NA
Q8K4Z3	NAD(P)H-hydrate epimerase (EC 5.1.99.6) (Apolipoprotein A-I-binding protein) (AI-BP) (NAD(P)HX epimerase)	NA	10.0442	NA	NA	NA	NA
Q8QZS1	3-hydroxyisobutyryl-CoA hydrolase, mitochondrial (EC 3.1.2.4) (3-hydroxyisobutyryl-coenzyme A hydrolase) (HIB-CoA hydrolase) (HIBYL-CoA-H)	NA	11.1601	NA	NA	NA	NA
Q8R035	Peptidyl-tRNA hydrolase ICT1, mitochondrial (EC 3.1.1.29) (39S ribosomal protein L58, mitochondrial) (MRP-L58) (Immature colon carcinoma transcript 1 protein homolog)	NA	11.9458	NA	NA	NA	NA
Q8R081	Heterogeneous nuclear ribonucleoprotein L (hnRNP L)	NA	11.0336	NA	NA	NA	NA
Q8R086	Sulfite oxidase, mitochondrial (EC 1.8.3.1)	NA	11.438	NA	NA	NA	NA
Q8R0P4	Mth938 domain-containing protein (LI2)	NA	10.8732	NA	NA	NA	NA
Q8R0W0	Epiplakin	NA	14.0646	NA	NA	NA	NA
Q8R0W0;Q9QXS1		NA	13.1515	NA	NA	NA	NA
Q8R0X7	Sphingosine-1-phosphate lyase 1 (S1PL) (SP-lyase 1) (SPL 1) (mSPL) (EC 4.1.2.27) (Sphingosine-1-phosphate aldolase)	NA	11.9396	NA	NA	NA	NA
Q8R164	Valacyclovir hydrolase (VACVase) (Valacyclovirase) (EC 3.1.-.-) (Biphenyl hydrolase-like protein)	NA	12.6045	NA	NA	NA	NA
Q8R180	ERO1-like protein alpha (ERO1-L) (ERO1-L-alpha) (EC 1.8.4.-) (Endoplasmic reticulum oxidoreductase alpha) (Endoplasmic reticulum oxidoreductin-1-like protein) (Oxidoreductin-1-L-alpha)	NA	11.4382	NA	NA	NA	NA
Q8R180;Q8R2E9		NA	12.3951	NA	NA	NA	NA
Q8R1G2	Carboxymethylenebutenolidase homolog (EC 3.1.-.-)	NA	12.5692	NA	NA	NA	NA
Q8R242	Di-N-acetylchitobiase (EC 3.2.1.-)	NA	11.5816	NA	NA	NA	NA
Q8VC30	Triokinase/FMN cyclase (Bifunctional ATP-dependent dihydroxyacetone kinase/FAD-AMP lyase (cyclizing)) [Includes: ATP-dependent dihydroxyacetone kinase (DHA kinase) (EC 2.7.1.28) (EC 2.7.1.29) (Glycerone kinase) (Triokinase) (Triose kinase); FAD-AMP lyase (cyclizing) (EC 4.6.1.15) (FAD-AMP lyase (cyclic FMN forming)) (FMN cyclase)]	NA	10.2386	NA	NA	NA	NA
Q8VCC1	15-hydroxyprostaglandin dehydrogenase [NAD(+)] (15-PGDH) (EC 1.1.1.141) (Eicosanoid/docosanoid dehydrogenase [NAD(+)]) (EC 1.1.1.-, EC 1.1.1.232) (Prostaglandin dehydrogenase 1)	NA	11.3748	NA	NA	NA	NA
Q8VCM7	Fibrinogen gamma chain	NA	11.6646	NA	NA	NA	NA
Q8VCR7	Putative protein-lysine deacylase ABHD14B (EC 2.3.1.-) (Alpha/beta hydrolase domain-containing protein 14B) (Abhydrolase domain-containing protein 14B)	NA	12.0528	NA	NA	NA	NA
Q8VCS3	Glycosaminoglycan xylosylkinase (EC 2.7.1.-) (Xylose kinase)	NA	10.0609	NA	NA	NA	NA
Q8VDJ3	Vigilin (High density lipoprotein-binding protein) (HDL-binding protein)	NA	11.3864	NA	NA	NA	NA
Q8VDM6	Heterogeneous nuclear ribonucleoprotein U-like protein 1	NA	11.9872	NA	NA	NA	NA
Q8VDP6	CDP-diacylglycerol--inositol 3-phosphatidyltransferase (EC 2.7.8.11) (Phosphatidylinositol synthase) (PI synthase) (PtdIns synthase)	NA	11.9641	NA	NA	NA	NA
Q8VED5	Keratin, type II cytoskeletal 79 (Cytokeratin-79) (CK-79) (Keratin-79) (K79) (Type-II keratin Kb38)	NA	18.3564	NA	NA	NA	NA
Q8VHB5	Carbonic anhydrase 9 (EC 4.2.1.1) (Carbonate dehydratase IX) (Carbonic anhydrase IX) (CA-IX) (CAIX) (Membrane antigen MN homolog)	NA	12.3596	NA	NA	NA	NA
Q8VHD8	Hornerin	NA	10.0103	NA	NA	NA	NA
Q8VIF2	Serine protease 42 (EC 3.4.21.-) (Testis serine protease 2)	NA	13.9816	NA	NA	NA	NA
Q91V01	Lysophospholipid acyltransferase 5 (LPLAT 5) (EC 2.3.1.-) (1-acylglycerophosphocholine O-acyltransferase) (EC 2.3.1.23) (1-acylglycerophosphoethanolamine O-acyltransferase) (EC 2.3.1.n7) (1-acylglycerophosphoserine O-acyltransferase) (EC 2.3.1.n6) (Lysophosphatidylcholine acyltransferase) (LPCAT) (Lyso-PC acyltransferase) (Lysophosphatidylcholine acyltransferase 3) (Lyso-PC acyltransferase 3) (mL…	NA	12.095	NA	NA	NA	NA
Q91V12	Cytosolic acyl coenzyme A thioester hydrolase (EC 3.1.2.2) (Acyl-CoA thioesterase 7) (Brain acyl-CoA hydrolase) (BACH) (CTE-IIa) (CTE-II) (Long chain acyl-CoA thioester hydrolase)	NA	10.8923	NA	NA	NA	NA
Q91VC4	Plasmalemma vesicle-associated protein (MECA-32 antigen) (Plasmalemma vesicle protein 1) (PV-1)	NA	13.1922	NA	NA	NA	NA
Q91VH2	Sorting nexin-9	NA	11.2824	NA	NA	NA	NA
Q91VW5	Golgin subfamily A member 4 (tGolgin-1)	NA	13.7624	NA	NA	NA	NA
Q91WK5	Glycine cleavage system H protein, mitochondrial (Lipoic acid-containing protein)	NA	12.6315	NA	NA	NA	NA
Q91WQ3	Tyrosine--tRNA ligase, cytoplasmic (EC 6.1.1.1) (Tyrosyl-tRNA synthetase) (TyrRS) [Cleaved into: Tyrosine--tRNA ligase, cytoplasmic, N-terminally processed]	NA	11.3623	NA	NA	NA	NA
Q91WT8	RNA-binding protein 47 (RNA-binding motif protein 47)	NA	11.9518	NA	NA	NA	NA
Q91XF0	Pyridoxine-5'-phosphate oxidase (EC 1.4.3.5) (Pyridoxamine-phosphate oxidase)	NA	12.9682	NA	NA	NA	NA
Q91YI0	Argininosuccinate lyase (ASAL) (EC 4.3.2.1) (Arginosuccinase)	NA	11.8608	NA	NA	NA	NA
Q91YN5	UDP-N-acetylhexosamine pyrophosphorylase [Includes: UDP-N-acetylgalactosamine pyrophosphorylase (EC 2.7.7.83); UDP-N-acetylglucosamine pyrophosphorylase (EC 2.7.7.23)]	NA	13.2082	NA	NA	NA	NA
Q91YP3	Deoxyribose-phosphate aldolase (DERA) (EC 4.1.2.4) (2-deoxy-D-ribose 5-phosphate aldolase) (Phosphodeoxyriboaldolase) (Deoxyriboaldolase)	NA	11.3146	NA	NA	NA	NA
Q91Z98	Chitinase-like protein 4 (Chitinase-3-like protein 4) (Secreted protein Ym2)	NA	11.7978	NA	NA	NA	NA
Q921S7	39S ribosomal protein L37, mitochondrial (L37mt) (MRP-L37)	NA	11.7326	NA	NA	NA	NA
Q921W0	Charged multivesicular body protein 1a (Chromatin-modifying protein 1a) (CHMP1a)	NA	13.4715	NA	NA	NA	NA
Q921X9	Protein disulfide-isomerase A5 (EC 5.3.4.1) (Protein disulfide isomerase-related protein)	NA	11.3282	NA	NA	NA	NA
Q922H4	Mannose-1-phosphate guanyltransferase alpha (GDP-mannose pyrophosphorylase A) (GTP-mannose-1-phosphate guanylyltransferase alpha)	NA	11.5696	NA	NA	NA	NA
Q923D2	Flavin reductase (NADPH) (FR) (EC 1.5.1.30) (Biliverdin reductase B) (BVR-B) (EC 1.3.1.24) (Biliverdin-IX beta-reductase) (NADPH-dependent diaphorase) (NADPH-flavin reductase) (FLR)	NA	11.5551	NA	NA	NA	NA
Q923U0	TOM1-like protein 1 (Src-activating and signaling molecule protein) (Target of Myb-like protein 1)	NA	11.4916	NA	NA	NA	NA
Q99020	Heterogeneous nuclear ribonucleoprotein A/B (hnRNP A/B) (CArG-binding factor-A) (CBF-A)	NA	11.6457	NA	NA	NA	NA
Q99JB2	Stomatin-like protein 2, mitochondrial (SLP-2) (mslp2)	NA	11.12	NA	NA	NA	NA
Q99JH8;Q9CQM2	ER lumen protein-retaining receptor 1 (KDEL endoplasmic reticulum protein retention receptor 1) (KDEL receptor 1)	NA	10.4718	NA	NA	NA	NA
Q99JX3	Golgi reassembly-stacking protein 2 (GRS2) (Golgi reassembly-stacking protein of 55 kDa) (GRASP55)	NA	11.0533	NA	NA	NA	NA
Q99KP6	Pre-mRNA-processing factor 19 (EC 2.3.2.27) (Nuclear matrix protein 200) (PRP19/PSO4 homolog) (RING-type E3 ubiquitin transferase PRP19) (Senescence evasion factor)	NA	11.8916	NA	NA	NA	NA
Q99KW9	T-cell immunomodulatory protein (Protein TIP) (Integrin-alpha FG-GAP repeat-containing protein 1) (Linkin)	NA	11.824	NA	NA	NA	NA
Q99M73	Keratin, type II cuticular Hb4 (65 kDa type II keratin) (Keratin-84) (K84) (Type II hair keratin Hb4) (Type-II keratin Kb24)	NA	12.8782	NA	NA	NA	NA
Q99M87	DnaJ homolog subfamily A member 3, mitochondrial (DnaJ protein Tid-1) (mTid-1) (Tumorous imaginal discs protein Tid56 homolog)	NA	11.6261	NA	NA	NA	NA
Q99MB1	Toll-like receptor 3 (CD antigen CD283)	NA	10.96	NA	NA	NA	NA
Q99N94	39S ribosomal protein L9, mitochondrial (L9mt) (MRP-L9)	NA	11.3095	NA	NA	NA	NA
Q99PE8	ATP-binding cassette sub-family G member 5 (EC 7.6.2.-) (Sterolin-1)	NA	14.2643	NA	NA	NA	NA
Q99PL5	Ribosome-binding protein 1 (Ribosome receptor protein) (RRp) (mRRp)	NA	11.6616	NA	NA	NA	NA
Q9CPQ3	Mitochondrial import receptor subunit TOM22 homolog (Translocase of outer membrane 22 kDa subunit homolog)	NA	10.7442	NA	NA	NA	NA
Q9CPR4	60S ribosomal protein L17	NA	11.7174	NA	NA	NA	NA
Q9CPS6	Adenosine 5'-monophosphoramidase HINT3 (EC 3.9.1.-) (HINT-4) (Histidine triad nucleotide-binding protein 3) (HINT-3)	NA	10.8728	NA	NA	NA	NA
Q9CPT4	Myeloid-derived growth factor (MYDGF)	NA	11.1523	NA	NA	NA	NA
Q9CPW4	Actin-related protein 2/3 complex subunit 5 (Arp2/3 complex 16 kDa subunit) (p16-ARC)	NA	11.5742	NA	NA	NA	NA
Q9CQ69	Cytochrome b-c1 complex subunit 8 (Complex III subunit 8) (Complex III subunit VIII) (Ubiquinol-cytochrome c reductase complex 9.5 kDa protein) (Ubiquinol-cytochrome c reductase complex ubiquinone-binding protein QP-C)	NA	13.6075	NA	NA	NA	NA
Q9CQC7	NADH dehydrogenase [ubiquinone] 1 beta subcomplex subunit 4 (Complex I-B15) (CI-B15) (NADH-ubiquinone oxidoreductase B15 subunit)	NA	10.851	NA	NA	NA	NA
Q9CQC9	GTP-binding protein SAR1b	NA	11.4413	NA	NA	NA	NA
Q9CQR4	Acyl-coenzyme A thioesterase 13 (Acyl-CoA thioesterase 13) (EC 3.1.2.-) (Hotdog-fold thioesterase superfamily member 2) (Palmitoyl-CoA hydrolase) (EC 3.1.2.2) (Thioesterase superfamily member 2) (THEM2)	NA	12.4525	NA	NA	NA	NA
Q9CQZ5	NADH dehydrogenase [ubiquinone] 1 alpha subcomplex subunit 6 (Complex I-B14) (CI-B14) (NADH-ubiquinone oxidoreductase B14 subunit)	NA	12.8019	NA	NA	NA	NA
Q9CR51	V-type proton ATPase subunit G 1 (V-ATPase subunit G 1) (V-ATPase 13 kDa subunit 1) (Vacuolar proton pump subunit G 1)	NA	11.7962	NA	NA	NA	NA
Q9CR67	Transmembrane protein 33 (Protein DB83)	NA	10.563	NA	NA	NA	NA
Q9CRB6	Tubulin polymerization-promoting protein family member 3	NA	11.7079	NA	NA	NA	NA
Q9CRB9	MICOS complex subunit Mic19 (Coiled-coil-helix-coiled-coil-helix domain-containing protein 3)	NA	14.2938	NA	NA	NA	NA
Q9CRD2	ER membrane protein complex subunit 2 (Tetratricopeptide repeat protein 35) (TPR repeat protein 35)	NA	11.8723	NA	NA	NA	NA
Q9CWS0	N(G),N(G)-dimethylarginine dimethylaminohydrolase 1 (DDAH-1) (Dimethylarginine dimethylaminohydrolase 1) (EC 3.5.3.18) (DDAHI) (Dimethylargininase-1)	NA	12.2637	NA	NA	NA	NA
Q9CXZ1	NADH dehydrogenase [ubiquinone] iron-sulfur protein 4, mitochondrial (Complex I-18 kDa) (CI-18 kDa) (Complex I-AQDQ) (CI-AQDQ) (NADH-ubiquinone oxidoreductase 18 kDa subunit)	NA	13.4212	NA	NA	NA	NA
Q9CY27	Very-long-chain enoyl-CoA reductase (EC 1.3.1.93) (Synaptic glycoprotein SC2) (Trans-2,3-enoyl-CoA reductase) (TER)	NA	12.4882	NA	NA	NA	NA
Q9CZD3	Glycine--tRNA ligase (EC 6.1.1.14) (Diadenosine tetraphosphate synthetase) (Ap4A synthetase) (EC 2.7.7.-) (Glycyl-tRNA synthetase 1) (GlyRS)	NA	12.8507	NA	NA	NA	NA
Q9CZL5	Pterin-4-alpha-carbinolamine dehydratase 2 (PHS 2) (EC 4.2.1.96) (4-alpha-hydroxy-tetrahydropterin dehydratase 2) (DcoH-like protein DCoHm) (Dimerization cofactor of hepatocyte nuclear factor 1 from muscle) (HNF-1-alpha dimerization cofactor)	NA	12.1762	NA	NA	NA	NA
Q9CZW4	Fatty acid CoA ligase Acsl3 (Arachidonate--CoA ligase) (EC 6.2.1.15) (Long-chain acyl-CoA synthetase 3) (LACS 3) (Long-chain-fatty-acid--CoA ligase 3) (EC 6.2.1.3) (Medium-chain acyl-CoA ligase Acsl3) (EC 6.2.1.2)	NA	11.4164	NA	NA	NA	NA
Q9D020	Cytosolic 5'-nucleotidase 3A (EC 3.1.3.5) (7-methylguanosine phosphate-specific 5'-nucleotidase) (7-methylguanosine nucleotidase) (EC 3.1.3.91) (Cytosolic 5'-nucleotidase 3) (Cytosolic 5'-nucleotidase III) (cN-III) (Lupin) (Pyrimidine 5'-nucleotidase 1) (P5'N-1) (P5N-1) (PN-I)	NA	11.1758	NA	NA	NA	NA
Q9D0A3	Arpin (Arp2/3 inhibition protein)	NA	14.0952	NA	NA	NA	NA
Q9D0I9	Arginine--tRNA ligase, cytoplasmic (EC 6.1.1.19) (Arginyl-tRNA synthetase) (ArgRS)	NA	13.6271	NA	NA	NA	NA
Q9D279	Mitotic interactor and substrate of PLK1 (Mitotic spindle positioning protein)	NA	12.3984	NA	NA	NA	NA
Q9D304	E3 ubiquitin-protein ligase RNF128 (EC 2.3.2.27) (Gene related to anergy in lymphocytes protein) (Goliath-related E3 ubiquitin-protein ligase 1) (RING finger protein 128) (RING-type E3 ubiquitin transferase RNF128)	NA	11.4701	NA	NA	NA	NA
Q9D338	39S ribosomal protein L19, mitochondrial (L19mt) (MRP-L19)	NA	10.8462	NA	NA	NA	NA
Q9D3P8	Plasminogen receptor (KT) (Plg-R(KT))	NA	12.9684	NA	NA	NA	NA
Q9D708	Protein S100-A16 (Protein S100F) (S100 calcium binding protein A16)	NA	12.4436	NA	NA	NA	NA
Q9D7N3	28S ribosomal protein S9, mitochondrial (MRP-S9) (S9mt)	NA	10.4389	NA	NA	NA	NA
Q9D8T0	Protein FAM3A	NA	10.0438	NA	NA	NA	NA
Q9D8T2	Gasdermin-D (Gasdermin domain-containing protein 1) [Cleaved into: Gasdermin-D, N-terminal (GSDMD-NT) (mGSDMD-NTD) (p30); Gasdermin-D, C-terminal (GSDMD-CT) (mGSDMD-CTD) (p20)]	NA	12.3304	NA	NA	NA	NA
Q9D8W5	26S proteasome non-ATPase regulatory subunit 12 (26S proteasome regulatory subunit RPN5) (26S proteasome regulatory subunit p55)	NA	13.7532	NA	NA	NA	NA
Q9D967	Magnesium-dependent phosphatase 1 (MDP-1) (EC 3.1.3.-) (EC 3.1.3.48)	NA	11.4231	NA	NA	NA	NA
Q9DBG3	AP-2 complex subunit beta (AP105B) (Adaptor protein complex AP-2 subunit beta) (Adaptor-related protein complex 2 subunit beta) (Beta-2-adaptin) (Beta-adaptin) (Clathrin assembly protein complex 2 beta large chain) (Plasma membrane adaptor HA2/AP2 adaptin beta subunit)	NA	11.4041	NA	NA	NA	NA
Q9DBG9	Tax1-binding protein 3 (Tax interaction protein 1) (TIP-1)	NA	11.5012	NA	NA	NA	NA
Q9DBM0	ATP-binding cassette sub-family G member 8 (EC 7.6.2.-) (Sterolin-2)	NA	11.0464	NA	NA	NA	NA
Q9DBN9	Probable ATP-dependent RNA helicase DDX59 (EC 3.6.4.13) (DEAD box protein 59) (Zinc finger HIT domain-containing protein 5)	NA	11.3651	NA	NA	NA	NA
Q9DBX6	Cytochrome P450 2S1 (EC 1.14.14.-) (CYPIIS1) (Hydroperoxy icosatetraenoate dehydratase) (EC 4.2.1.152) (Thromboxane-A synthase) (EC 5.3.99.5)	NA	11.088	NA	NA	NA	NA
Q9DC29	ATP-binding cassette sub-family B member 6 (ABC-type heme transporter ABCB6) (EC 7.6.2.5)	NA	13.1117	NA	NA	NA	NA
Q9DC61	Mitochondrial-processing peptidase subunit alpha (Alpha-MPP) (Inactive zinc metalloprotease alpha) (P-55)	NA	12.0258	NA	NA	NA	NA
Q9DCS3	Enoyl-[acyl-carrier-protein] reductase, mitochondrial (EC 1.3.1.104) (2-enoyl thioester reductase) (Nuclear receptor-binding factor 1) (NRBF-1)	NA	11.8764	NA	NA	NA	NA
Q9DCV7	Keratin, type II cytoskeletal 7 (Cytokeratin-7) (CK-7) (Keratin-7) (K7) (Type-II keratin Kb7)	NA	13.2761	NA	NA	NA	NA
Q9EPB5	Serine hydrolase-like protein (SHL) (EC 3.1.-.-)	NA	11.6299	NA	NA	NA	NA
Q9EQW7	Kinesin-like protein KIF13A	NA	10.4392	NA	NA	NA	NA
Q9ERG0	LIM domain and actin-binding protein 1 (Epithelial protein lost in neoplasm) (mEPLIN)	NA	12.6967	NA	NA	NA	NA
Q9ERI2	Ras-related protein Rab-27A (EC 3.6.5.2)	NA	12.0778	NA	NA	NA	NA
Q9ES97	Reticulon-3	NA	11.9539	NA	NA	NA	NA
Q9ESE1	Lipopolysaccharide-responsive and beige-like anchor protein (Beige-like protein)	NA	11.2103	NA	NA	NA	NA
Q9JHJ0	Tropomodulin-3 (Ubiquitous tropomodulin) (U-Tmod)	NA	10.1893	NA	NA	NA	NA
Q9JIF7	Coatomer subunit beta (Beta-coat protein) (Beta-COP)	NA	12.2304	NA	NA	NA	NA
Q9JIZ9	Phospholipid scramblase 3 (PL scramblase 3) (Ca(2+)-dependent phospholipid scramblase 3)	NA	11.3831	NA	NA	NA	NA
Q9JJ28	Protein flightless-1 homolog	NA	12.2218	NA	NA	NA	NA
Q9JJU8	Adapter Sh3bgrl (SH3 domain-binding glutamic acid-rich-like protein 1)	NA	11.6945	NA	NA	NA	NA
Q9JJZ2	Tubulin alpha-8 chain (EC 3.6.5.-) (Alpha-tubulin 8) [Cleaved into: Dephenylalaninated tubulin alpha-8 chain]	NA	11.25	NA	NA	NA	NA
Q9JK38	Glucosamine 6-phosphate N-acetyltransferase (EC 2.3.1.4) (Phosphoglucosamine acetylase) (Phosphoglucosamine transacetylase) (Protein EMeg32)	NA	12.0314	NA	NA	NA	NA
Q9JLF6	Protein-glutamine gamma-glutamyltransferase K (EC 2.3.2.13) (Epidermal TGase) (Transglutaminase K) (TG(K)) (TGK) (TGase K) (Transglutaminase-1) (TGase-1)	NA	11.628	NA	NA	NA	NA
Q9JM14	5'(3')-deoxyribonucleotidase, cytosolic type (EC 3.1.3.-) (Cytosolic 5',3'-pyrimidine nucleotidase) (Deoxy-5'-nucleotidase 1) (dNT-1)	NA	11.8101	NA	NA	NA	NA
Q9JMD3	START domain-containing protein 10 (StARD10) (PCTP-like protein) (PCTP-L) (Serologically defined colon cancer antigen 28 homolog) (StAR-related lipid transfer protein 10)	NA	12.6166	NA	NA	NA	NA
Q9QXA6	b(0,+)-type amino acid transporter 1 (b(0,+)AT1) (Glycoprotein-associated amino acid transporter b0,+AT1) (Solute carrier family 7 member 9)	NA	11.5487	NA	NA	NA	NA
Q9QY30	Bile salt export pump (EC 7.6.2.-) (ATP-binding cassette sub-family B member 11) (Sister of P-glycoprotein)	NA	10.7393	NA	NA	NA	NA
Q9QY33	Tetraspanin-3 (Tspan-3) (OSP-associated protein 1) (OAP-1) (Tetraspanin TM4-A) (Transmembrane 4 superfamily member 8)	NA	12.5962	NA	NA	NA	NA
Q9QYC0	Alpha-adducin (Erythrocyte adducin subunit alpha)	NA	11.6947	NA	NA	NA	NA
Q9QYJ0	DnaJ homolog subfamily A member 2 (mDj3)	NA	12.391	NA	NA	NA	NA
Q9QZZ4	Unconventional myosin-XV (Unconventional myosin-15)	NA	13.6638	NA	NA	NA	NA
Q9R0Q3	Transmembrane emp24 domain-containing protein 2 (COPI-coated vesicle membrane protein p24) (Membrane protein p24A) (Sid 394) (p24 family protein beta-1) (p24beta1)	NA	12.3794	NA	NA	NA	NA
Q9R1Q9	V-type proton ATPase subunit S1 (V-ATPase subunit S1) (Protein C7-1) (V-ATPase Ac45 subunit) (V-ATPase S1 accessory protein) (Vacuolar proton pump subunit S1)	NA	13.4037	NA	NA	NA	NA
Q9WTL2	Ras-related protein Rab-25	NA	12.6139	NA	NA	NA	NA
Q9WV56	Growth/differentiation factor 2 (GDF-2) (Bone morphogenetic protein 9) (BMP-9)	NA	10.1662	NA	NA	NA	NA
Q9WVJ2	26S proteasome non-ATPase regulatory subunit 13 (26S proteasome regulatory subunit RPN9) (26S proteasome regulatory subunit S11) (26S proteasome regulatory subunit p40.5)	NA	12.4857	NA	NA	NA	NA
Q9Z0J1	Reversion-inducing cysteine-rich protein with Kazal motifs (mRECK)	NA	13.2626	NA	NA	NA	NA
Q9Z0T9	Integrin beta-6	NA	13.7461	NA	NA	NA	NA
Q9Z0U1	Tight junction protein ZO-2 (Tight junction protein 2) (Zona occludens protein 2) (Zonula occludens protein 2)	NA	12.5105	NA	NA	NA	NA
Q9Z1B7	Mitogen-activated protein kinase 13 (MAP kinase 13) (MAPK 13) (EC 2.7.11.24) (Mitogen-activated protein kinase p38 delta) (MAP kinase p38 delta) (Stress-activated protein kinase 4)	NA	12.2265	NA	NA	NA	NA
Q9Z1N5	Spliceosome RNA helicase Ddx39b (EC 3.6.4.13) (56 kDa U2AF65-associated protein) (DEAD box protein UAP56) (HLA-B-associated transcript 1 protein)	NA	11.3962	NA	NA	NA	NA
Q9Z1Q9	Valine--tRNA ligase (EC 6.1.1.9) (Protein G7a) (Valyl-tRNA synthetase) (ValRS)	NA	12.5005	NA	NA	NA	NA
Q9Z204	Heterogeneous nuclear ribonucleoproteins C1/C2 (hnRNP C1/C2)	NA	10.8352	NA	NA	NA	NA
Q9Z2G9	Oxidoreductase HTATIP2 (EC 1.1.1.-)	NA	11.6163	NA	NA	NA	NA
Q9Z2W9	Glutamate receptor 3 (GluR-3) (AMPA-selective glutamate receptor 3) (GluR-C) (GluR-K3) (Glutamate receptor ionotropic, AMPA 3) (GluA3)	NA	13.358	NA	NA	NA	NA
Q9Z2X1	Heterogeneous nuclear ribonucleoprotein F (hnRNP F) [Cleaved into: Heterogeneous nuclear ribonucleoprotein F, N-terminally processed]	NA	11.3195	NA	NA	NA	NA
Q9Z2Y8	Pyridoxal phosphate homeostasis protein (PLP homeostasis protein) (Proline synthase co-transcribed bacterial homolog protein) (Pyridoxal phosphate-binding protein)	NA	10.9498	NA	NA	NA	NA
